# Supplementary material for: A roadmap to human hippocampal neurogenesis in adulthood, aging and AD.
Source: Research Square preprint supplement (doi:10.21203/rs.3.rs-4469965/v1), 2024-05-30
Supplement: Supplementary file 1 [file 12cd528910948c9b0888ec25.xlsx]

## Sheet: all_interactions
source	target	ligand	receptor	prob	pval	interaction_name	interaction_name_2	pathway_name	annotation	evidence
ClusterAstrocytes	ClusterEndothelial	TGFB2	TGFbR1_R2	0.0043116	0	TGFB2_TGFBR1_TGFBR2	TGFB2 - (TGFBR1+TGFBR2)	TGFb	Secreted Signaling	KEGG: hsa04350
ClusterCA2-4_neurons	ClusterEndothelial	TGFB2	TGFbR1_R2	0.00112477	0	TGFB2_TGFBR1_TGFBR2	TGFB2 - (TGFBR1+TGFBR2)	TGFb	Secreted Signaling	KEGG: hsa04350
ClusterEpendymal	ClusterEndothelial	TGFB2	TGFbR1_R2	0.00583188	0	TGFB2_TGFBR1_TGFBR2	TGFB2 - (TGFBR1+TGFBR2)	TGFb	Secreted Signaling	KEGG: hsa04350
ClusterGABA_neurons	ClusterEndothelial	TGFB2	TGFbR1_R2	0.00132284	0	TGFB2_TGFBR1_TGFBR2	TGFB2 - (TGFBR1+TGFBR2)	TGFb	Secreted Signaling	KEGG: hsa04350
ClusterNeural Stem	ClusterEndothelial	TGFB2	TGFbR1_R2	0.00381564	0	TGFB2_TGFBR1_TGFBR2	TGFB2 - (TGFBR1+TGFBR2)	TGFb	Secreted Signaling	KEGG: hsa04350
ClusterAstrocytes	ClusterEpendymal	TGFB2	TGFbR1_R2	0.00174236	0	TGFB2_TGFBR1_TGFBR2	TGFB2 - (TGFBR1+TGFBR2)	TGFb	Secreted Signaling	KEGG: hsa04350
ClusterCA2-4_neurons	ClusterEpendymal	TGFB2	TGFbR1_R2	0.00045331	0	TGFB2_TGFBR1_TGFBR2	TGFB2 - (TGFBR1+TGFBR2)	TGFb	Secreted Signaling	KEGG: hsa04350
ClusterEpendymal	ClusterEpendymal	TGFB2	TGFbR1_R2	0.00236109	0	TGFB2_TGFBR1_TGFBR2	TGFB2 - (TGFBR1+TGFBR2)	TGFb	Secreted Signaling	KEGG: hsa04350
ClusterGABA_neurons	ClusterEpendymal	TGFB2	TGFbR1_R2	0.000533207	0	TGFB2_TGFBR1_TGFBR2	TGFB2 - (TGFBR1+TGFBR2)	TGFb	Secreted Signaling	KEGG: hsa04350
ClusterNeural Stem	ClusterEpendymal	TGFB2	TGFbR1_R2	0.0015422	0	TGFB2_TGFBR1_TGFBR2	TGFB2 - (TGFBR1+TGFBR2)	TGFb	Secreted Signaling	KEGG: hsa04350
ClusterAstrocytes	ClusterMicroglia	TGFB2	TGFbR1_R2	0.0178664	0	TGFB2_TGFBR1_TGFBR2	TGFB2 - (TGFBR1+TGFBR2)	TGFb	Secreted Signaling	KEGG: hsa04350
ClusterCA2-4_neurons	ClusterMicroglia	TGFB2	TGFbR1_R2	0.00471069	0	TGFB2_TGFBR1_TGFBR2	TGFB2 - (TGFBR1+TGFBR2)	TGFb	Secreted Signaling	KEGG: hsa04350
ClusterEpendymal	ClusterMicroglia	TGFB2	TGFbR1_R2	0.0239917	0	TGFB2_TGFBR1_TGFBR2	TGFB2 - (TGFBR1+TGFBR2)	TGFb	Secreted Signaling	KEGG: hsa04350
ClusterGABA_neurons	ClusterMicroglia	TGFB2	TGFbR1_R2	0.00553746	0	TGFB2_TGFBR1_TGFBR2	TGFB2 - (TGFBR1+TGFBR2)	TGFb	Secreted Signaling	KEGG: hsa04350
ClusterNeural Stem	ClusterMicroglia	TGFB2	TGFbR1_R2	0.0158009	0	TGFB2_TGFBR1_TGFBR2	TGFB2 - (TGFBR1+TGFBR2)	TGFb	Secreted Signaling	KEGG: hsa04350
ClusterAstrocytes	ClusterEndothelial	TGFB2	ACVR1_TGFbR	0.00710796	0	TGFB2_ACVR1_TGFBR1	TGFB2 - (ACVR1+TGFBR1)	TGFb	Secreted Signaling	PMID: 29376829
ClusterCA2-4_neurons	ClusterEndothelial	TGFB2	ACVR1_TGFbR	0.0017146	0	TGFB2_ACVR1_TGFBR1	TGFB2 - (ACVR1+TGFBR1)	TGFb	Secreted Signaling	PMID: 29376829
ClusterEpendymal	ClusterEndothelial	TGFB2	ACVR1_TGFbR	0.010804	0	TGFB2_ACVR1_TGFBR1	TGFB2 - (ACVR1+TGFBR1)	TGFb	Secreted Signaling	PMID: 29376829
ClusterGABA_neurons	ClusterEndothelial	TGFB2	ACVR1_TGFbR	0.00196925	0	TGFB2_ACVR1_TGFBR1	TGFB2 - (ACVR1+TGFBR1)	TGFb	Secreted Signaling	PMID: 29376829
ClusterNeural Stem	ClusterEndothelial	TGFB2	ACVR1_TGFbR	0.00743976	0	TGFB2_ACVR1_TGFBR1	TGFB2 - (ACVR1+TGFBR1)	TGFb	Secreted Signaling	PMID: 29376829
ClusterAstrocytes	ClusterEpendymal	TGFB2	ACVR1_TGFbR	0.00253019	0	TGFB2_ACVR1_TGFBR1	TGFB2 - (ACVR1+TGFBR1)	TGFb	Secreted Signaling	PMID: 29376829
ClusterCA2-4_neurons	ClusterEpendymal	TGFB2	ACVR1_TGFbR	0.000608211	0	TGFB2_ACVR1_TGFBR1	TGFB2 - (ACVR1+TGFBR1)	TGFb	Secreted Signaling	PMID: 29376829
ClusterEpendymal	ClusterEpendymal	TGFB2	ACVR1_TGFbR	0.00385511	0	TGFB2_ACVR1_TGFBR1	TGFB2 - (ACVR1+TGFBR1)	TGFb	Secreted Signaling	PMID: 29376829
ClusterGABA_neurons	ClusterEpendymal	TGFB2	ACVR1_TGFbR	0.000698657	0	TGFB2_ACVR1_TGFBR1	TGFB2 - (ACVR1+TGFBR1)	TGFb	Secreted Signaling	PMID: 29376829
ClusterNeural Stem	ClusterEpendymal	TGFB2	ACVR1_TGFbR	0.00264887	0	TGFB2_ACVR1_TGFBR1	TGFB2 - (ACVR1+TGFBR1)	TGFb	Secreted Signaling	PMID: 29376829
ClusterEndothelial	ClusterCA2-4_neurons	BMP6	ACVR1_ACVR2A	0.00656457	0	BMP6_ACVR1_ACVR2A	BMP6 - (ACVR1+ACVR2A)	BMP	Secreted Signaling	KEGG: hsa04350; PMID:26893264
ClusterEndothelial	ClusterCA_neurons	BMP6	ACVR1_ACVR2A	0.00446164	0	BMP6_ACVR1_ACVR2A	BMP6 - (ACVR1+ACVR2A)	BMP	Secreted Signaling	KEGG: hsa04350; PMID:26893264
ClusterEndothelial	ClusterEndothelial	BMP6	ACVR1_ACVR2A	0.00354105	0	BMP6_ACVR1_ACVR2A	BMP6 - (ACVR1+ACVR2A)	BMP	Secreted Signaling	KEGG: hsa04350; PMID:26893264
ClusterEndothelial	ClusterEpendymal	BMP6	ACVR1_ACVR2A	0.00177065	0	BMP6_ACVR1_ACVR2A	BMP6 - (ACVR1+ACVR2A)	BMP	Secreted Signaling	KEGG: hsa04350; PMID:26893264
ClusterEndothelial	ClusterGABA_neurons	BMP6	ACVR1_ACVR2A	0.00282307	0	BMP6_ACVR1_ACVR2A	BMP6 - (ACVR1+ACVR2A)	BMP	Secreted Signaling	KEGG: hsa04350; PMID:26893264
ClusterEndothelial	ClusterImmature	BMP6	ACVR1_ACVR2A	0.00942984	0	BMP6_ACVR1_ACVR2A	BMP6 - (ACVR1+ACVR2A)	BMP	Secreted Signaling	KEGG: hsa04350; PMID:26893264
ClusterEndothelial	ClustermGC	BMP6	ACVR1_ACVR2A	0.00906796	0	BMP6_ACVR1_ACVR2A	BMP6 - (ACVR1+ACVR2A)	BMP	Secreted Signaling	KEGG: hsa04350; PMID:26893264
ClusterEndothelial	ClusterGABA_neurons	BMP6	ACVR1_ACVR2B	0.00104488	0	BMP6_ACVR1_ACVR2B	BMP6 - (ACVR1+ACVR2B)	BMP	Secreted Signaling	KEGG: hsa04350; PMID:26893264
ClusterEndothelial	ClusterCA2-4_neurons	BMP6	ACVR1_BMPR2	0.00896737	0	BMP6_ACVR1_BMPR2	BMP6 - (ACVR1+BMPR2)	BMP	Secreted Signaling	KEGG: hsa04350; PMID:26893264
ClusterEndothelial	ClusterCA_neurons	BMP6	ACVR1_BMPR2	0.00703914	0	BMP6_ACVR1_BMPR2	BMP6 - (ACVR1+BMPR2)	BMP	Secreted Signaling	KEGG: hsa04350; PMID:26893264
ClusterEndothelial	ClusterEndothelial	BMP6	ACVR1_BMPR2	0.0111467	0	BMP6_ACVR1_BMPR2	BMP6 - (ACVR1+BMPR2)	BMP	Secreted Signaling	KEGG: hsa04350; PMID:26893264
ClusterEndothelial	ClusterEpendymal	BMP6	ACVR1_BMPR2	0.00393676	0	BMP6_ACVR1_BMPR2	BMP6 - (ACVR1+BMPR2)	BMP	Secreted Signaling	KEGG: hsa04350; PMID:26893264
ClusterEndothelial	ClusterGABA_neurons	BMP6	ACVR1_BMPR2	0.00431839	0	BMP6_ACVR1_BMPR2	BMP6 - (ACVR1+BMPR2)	BMP	Secreted Signaling	KEGG: hsa04350; PMID:26893264
ClusterEndothelial	ClusterImmature	BMP6	ACVR1_BMPR2	0.0106205	0	BMP6_ACVR1_BMPR2	BMP6 - (ACVR1+BMPR2)	BMP	Secreted Signaling	KEGG: hsa04350; PMID:26893264
ClusterEndothelial	ClusterNeural Stem	BMP6	ACVR1_BMPR2	0.00380246	0	BMP6_ACVR1_BMPR2	BMP6 - (ACVR1+BMPR2)	BMP	Secreted Signaling	KEGG: hsa04350; PMID:26893264
ClusterEndothelial	ClustermGC	BMP6	ACVR1_BMPR2	0.0115672	0	BMP6_ACVR1_BMPR2	BMP6 - (ACVR1+BMPR2)	BMP	Secreted Signaling	KEGG: hsa04350; PMID:26893264
ClusterEndothelial	ClusterCA2-4_neurons	BMP6	BMPR1A_ACVR2A	0.00499024	0	BMP6_BMPR1A_ACVR2A	BMP6 - (BMPR1A+ACVR2A)	BMP	Secreted Signaling	KEGG: hsa04350; PMID:26893264
ClusterEndothelial	ClusterCA_neurons	BMP6	BMPR1A_ACVR2A	0.00515185	0	BMP6_BMPR1A_ACVR2A	BMP6 - (BMPR1A+ACVR2A)	BMP	Secreted Signaling	KEGG: hsa04350; PMID:26893264
ClusterEndothelial	ClusterEndothelial	BMP6	BMPR1A_ACVR2A	0.00218113	0	BMP6_BMPR1A_ACVR2A	BMP6 - (BMPR1A+ACVR2A)	BMP	Secreted Signaling	KEGG: hsa04350; PMID:26893264
ClusterEndothelial	ClusterEpendymal	BMP6	BMPR1A_ACVR2A	0.00408943	0	BMP6_BMPR1A_ACVR2A	BMP6 - (BMPR1A+ACVR2A)	BMP	Secreted Signaling	KEGG: hsa04350; PMID:26893264
ClusterEndothelial	ClusterGABA_neurons	BMP6	BMPR1A_ACVR2A	0.00588695	0	BMP6_BMPR1A_ACVR2A	BMP6 - (BMPR1A+ACVR2A)	BMP	Secreted Signaling	KEGG: hsa04350; PMID:26893264
ClusterEndothelial	ClusterImmature	BMP6	BMPR1A_ACVR2A	0.00832576	0	BMP6_BMPR1A_ACVR2A	BMP6 - (BMPR1A+ACVR2A)	BMP	Secreted Signaling	KEGG: hsa04350; PMID:26893264
ClusterEndothelial	ClusterOPCs	BMP6	BMPR1A_ACVR2A	0.00332534	0	BMP6_BMPR1A_ACVR2A	BMP6 - (BMPR1A+ACVR2A)	BMP	Secreted Signaling	KEGG: hsa04350; PMID:26893264
ClusterEndothelial	ClustermGC	BMP6	BMPR1A_ACVR2A	0.00768925	0	BMP6_BMPR1A_ACVR2A	BMP6 - (BMPR1A+ACVR2A)	BMP	Secreted Signaling	KEGG: hsa04350; PMID:26893264
ClusterEndothelial	ClusterGABA_neurons	BMP6	BMPR1A_ACVR2B	0.00218326	0	BMP6_BMPR1A_ACVR2B	BMP6 - (BMPR1A+ACVR2B)	BMP	Secreted Signaling	KEGG: hsa04350; PMID:26893264
ClusterEndothelial	ClusterAstrocytes	BMP6	BMPR1A_BMPR2	0.00988971	0	BMP6_BMPR1A_BMPR2	BMP6 - (BMPR1A+BMPR2)	BMP	Secreted Signaling	KEGG: hsa04350; PMID:26893264
ClusterEndothelial	ClusterCA2-4_neurons	BMP6	BMPR1A_BMPR2	0.00682094	0	BMP6_BMPR1A_BMPR2	BMP6 - (BMPR1A+BMPR2)	BMP	Secreted Signaling	KEGG: hsa04350; PMID:26893264
ClusterEndothelial	ClusterCA_neurons	BMP6	BMPR1A_BMPR2	0.00812477	0	BMP6_BMPR1A_BMPR2	BMP6 - (BMPR1A+BMPR2)	BMP	Secreted Signaling	KEGG: hsa04350; PMID:26893264
ClusterEndothelial	ClusterEndothelial	BMP6	BMPR1A_BMPR2	0.00688692	0	BMP6_BMPR1A_BMPR2	BMP6 - (BMPR1A+BMPR2)	BMP	Secreted Signaling	KEGG: hsa04350; PMID:26893264
ClusterEndothelial	ClusterEpendymal	BMP6	BMPR1A_BMPR2	0.00906591	0	BMP6_BMPR1A_BMPR2	BMP6 - (BMPR1A+BMPR2)	BMP	Secreted Signaling	KEGG: hsa04350; PMID:26893264
ClusterEndothelial	ClusterGABA_neurons	BMP6	BMPR1A_BMPR2	0.00898999	0	BMP6_BMPR1A_BMPR2	BMP6 - (BMPR1A+BMPR2)	BMP	Secreted Signaling	KEGG: hsa04350; PMID:26893264
ClusterEndothelial	ClusterImmature	BMP6	BMPR1A_BMPR2	0.00937842	0	BMP6_BMPR1A_BMPR2	BMP6 - (BMPR1A+BMPR2)	BMP	Secreted Signaling	KEGG: hsa04350; PMID:26893264
ClusterEndothelial	ClusterMicroglia	BMP6	BMPR1A_BMPR2	0.00388177	0	BMP6_BMPR1A_BMPR2	BMP6 - (BMPR1A+BMPR2)	BMP	Secreted Signaling	KEGG: hsa04350; PMID:26893264
ClusterEndothelial	ClusterNeural Stem	BMP6	BMPR1A_BMPR2	0.012448	0	BMP6_BMPR1A_BMPR2	BMP6 - (BMPR1A+BMPR2)	BMP	Secreted Signaling	KEGG: hsa04350; PMID:26893264
ClusterEndothelial	ClusterNeuroblast	BMP6	BMPR1A_BMPR2	0.0026671	0	BMP6_BMPR1A_BMPR2	BMP6 - (BMPR1A+BMPR2)	BMP	Secreted Signaling	KEGG: hsa04350; PMID:26893264
ClusterEndothelial	ClusterOPCs	BMP6	BMPR1A_BMPR2	0.00546656	0	BMP6_BMPR1A_BMPR2	BMP6 - (BMPR1A+BMPR2)	BMP	Secreted Signaling	KEGG: hsa04350; PMID:26893264
ClusterEndothelial	ClustermGC	BMP6	BMPR1A_BMPR2	0.00981233	0	BMP6_BMPR1A_BMPR2	BMP6 - (BMPR1A+BMPR2)	BMP	Secreted Signaling	KEGG: hsa04350; PMID:26893264
ClusterEndothelial	ClusterCA2-4_neurons	BMP6	BMPR1B_ACVR2A	0.00152573	0	BMP6_BMPR1B_ACVR2A	BMP6 - (BMPR1B+ACVR2A)	BMP	Secreted Signaling	KEGG: hsa04350; PMID:26893264
ClusterEndothelial	ClusterEpendymal	BMP6	BMPR1B_ACVR2A	0.00451497	0	BMP6_BMPR1B_ACVR2A	BMP6 - (BMPR1B+ACVR2A)	BMP	Secreted Signaling	KEGG: hsa04350; PMID:26893264
ClusterEndothelial	ClusterAstrocytes	BMP6	BMPR1B_BMPR2	0.0133421	0	BMP6_BMPR1B_BMPR2	BMP6 - (BMPR1B+BMPR2)	BMP	Secreted Signaling	KEGG: hsa04350; PMID:26893264
ClusterEndothelial	ClusterCA2-4_neurons	BMP6	BMPR1B_BMPR2	0.00208824	0	BMP6_BMPR1B_BMPR2	BMP6 - (BMPR1B+BMPR2)	BMP	Secreted Signaling	KEGG: hsa04350; PMID:26893264
ClusterEndothelial	ClusterEpendymal	BMP6	BMPR1B_BMPR2	0.010004	0	BMP6_BMPR1B_BMPR2	BMP6 - (BMPR1B+BMPR2)	BMP	Secreted Signaling	KEGG: hsa04350; PMID:26893264
ClusterEndothelial	ClusterNeural Stem	BMP6	BMPR1B_BMPR2	0.0145781	0	BMP6_BMPR1B_BMPR2	BMP6 - (BMPR1B+BMPR2)	BMP	Secreted Signaling	KEGG: hsa04350; PMID:26893264
ClusterAstrocytes	ClusterCA2-4_neurons	BMP7	ACVR1_ACVR2A	0.00607193	0	BMP7_ACVR1_ACVR2A	BMP7 - (ACVR1+ACVR2A)	BMP	Secreted Signaling	KEGG: hsa04350; PMID:26893264
ClusterCA2-4_neurons	ClusterCA2-4_neurons	BMP7	ACVR1_ACVR2A	0.00167399	0	BMP7_ACVR1_ACVR2A	BMP7 - (ACVR1+ACVR2A)	BMP	Secreted Signaling	KEGG: hsa04350; PMID:26893264
ClusterEpendymal	ClusterCA2-4_neurons	BMP7	ACVR1_ACVR2A	0.0124913	0	BMP7_ACVR1_ACVR2A	BMP7 - (ACVR1+ACVR2A)	BMP	Secreted Signaling	KEGG: hsa04350; PMID:26893264
ClusterNeural Stem	ClusterCA2-4_neurons	BMP7	ACVR1_ACVR2A	0.0052106	0	BMP7_ACVR1_ACVR2A	BMP7 - (ACVR1+ACVR2A)	BMP	Secreted Signaling	KEGG: hsa04350; PMID:26893264
ClusterOPCs	ClusterCA2-4_neurons	BMP7	ACVR1_ACVR2A	0.007828	0	BMP7_ACVR1_ACVR2A	BMP7 - (ACVR1+ACVR2A)	BMP	Secreted Signaling	KEGG: hsa04350; PMID:26893264
ClusterAstrocytes	ClusterCA_neurons	BMP7	ACVR1_ACVR2A	0.00412591	0	BMP7_ACVR1_ACVR2A	BMP7 - (ACVR1+ACVR2A)	BMP	Secreted Signaling	KEGG: hsa04350; PMID:26893264
ClusterCA2-4_neurons	ClusterCA_neurons	BMP7	ACVR1_ACVR2A	0.00113576	0	BMP7_ACVR1_ACVR2A	BMP7 - (ACVR1+ACVR2A)	BMP	Secreted Signaling	KEGG: hsa04350; PMID:26893264
ClusterEpendymal	ClusterCA_neurons	BMP7	ACVR1_ACVR2A	0.00850699	0	BMP7_ACVR1_ACVR2A	BMP7 - (ACVR1+ACVR2A)	BMP	Secreted Signaling	KEGG: hsa04350; PMID:26893264
ClusterNeural Stem	ClusterCA_neurons	BMP7	ACVR1_ACVR2A	0.00353957	0	BMP7_ACVR1_ACVR2A	BMP7 - (ACVR1+ACVR2A)	BMP	Secreted Signaling	KEGG: hsa04350; PMID:26893264
ClusterOPCs	ClusterCA_neurons	BMP7	ACVR1_ACVR2A	0.00532244	0	BMP7_ACVR1_ACVR2A	BMP7 - (ACVR1+ACVR2A)	BMP	Secreted Signaling	KEGG: hsa04350; PMID:26893264
ClusterAstrocytes	ClusterEndothelial	BMP7	ACVR1_ACVR2A	0.00327433	0	BMP7_ACVR1_ACVR2A	BMP7 - (ACVR1+ACVR2A)	BMP	Secreted Signaling	KEGG: hsa04350; PMID:26893264
ClusterCA2-4_neurons	ClusterEndothelial	BMP7	ACVR1_ACVR2A	0.000900832	0	BMP7_ACVR1_ACVR2A	BMP7 - (ACVR1+ACVR2A)	BMP	Secreted Signaling	KEGG: hsa04350; PMID:26893264
ClusterEpendymal	ClusterEndothelial	BMP7	ACVR1_ACVR2A	0.00675681	0	BMP7_ACVR1_ACVR2A	BMP7 - (ACVR1+ACVR2A)	BMP	Secreted Signaling	KEGG: hsa04350; PMID:26893264
ClusterNeural Stem	ClusterEndothelial	BMP7	ACVR1_ACVR2A	0.00280869	0	BMP7_ACVR1_ACVR2A	BMP7 - (ACVR1+ACVR2A)	BMP	Secreted Signaling	KEGG: hsa04350; PMID:26893264
ClusterOPCs	ClusterEndothelial	BMP7	ACVR1_ACVR2A	0.00422485	0	BMP7_ACVR1_ACVR2A	BMP7 - (ACVR1+ACVR2A)	BMP	Secreted Signaling	KEGG: hsa04350; PMID:26893264
ClusterAstrocytes	ClusterEpendymal	BMP7	ACVR1_ACVR2A	0.00163699	0	BMP7_ACVR1_ACVR2A	BMP7 - (ACVR1+ACVR2A)	BMP	Secreted Signaling	KEGG: hsa04350; PMID:26893264
ClusterCA2-4_neurons	ClusterEpendymal	BMP7	ACVR1_ACVR2A	0.000449817	0	BMP7_ACVR1_ACVR2A	BMP7 - (ACVR1+ACVR2A)	BMP	Secreted Signaling	KEGG: hsa04350; PMID:26893264
ClusterEpendymal	ClusterEpendymal	BMP7	ACVR1_ACVR2A	0.0033842	0	BMP7_ACVR1_ACVR2A	BMP7 - (ACVR1+ACVR2A)	BMP	Secreted Signaling	KEGG: hsa04350; PMID:26893264
ClusterNeural Stem	ClusterEpendymal	BMP7	ACVR1_ACVR2A	0.00140386	0	BMP7_ACVR1_ACVR2A	BMP7 - (ACVR1+ACVR2A)	BMP	Secreted Signaling	KEGG: hsa04350; PMID:26893264
ClusterOPCs	ClusterEpendymal	BMP7	ACVR1_ACVR2A	0.00211325	0	BMP7_ACVR1_ACVR2A	BMP7 - (ACVR1+ACVR2A)	BMP	Secreted Signaling	KEGG: hsa04350; PMID:26893264
ClusterAstrocytes	ClusterGABA_neurons	BMP7	ACVR1_ACVR2A	0.00261024	0	BMP7_ACVR1_ACVR2A	BMP7 - (ACVR1+ACVR2A)	BMP	Secreted Signaling	KEGG: hsa04350; PMID:26893264
ClusterCA2-4_neurons	ClusterGABA_neurons	BMP7	ACVR1_ACVR2A	0.000717771	0	BMP7_ACVR1_ACVR2A	BMP7 - (ACVR1+ACVR2A)	BMP	Secreted Signaling	KEGG: hsa04350; PMID:26893264
ClusterEpendymal	ClusterGABA_neurons	BMP7	ACVR1_ACVR2A	0.00539041	0	BMP7_ACVR1_ACVR2A	BMP7 - (ACVR1+ACVR2A)	BMP	Secreted Signaling	KEGG: hsa04350; PMID:26893264
ClusterNeural Stem	ClusterGABA_neurons	BMP7	ACVR1_ACVR2A	0.00223882	0	BMP7_ACVR1_ACVR2A	BMP7 - (ACVR1+ACVR2A)	BMP	Secreted Signaling	KEGG: hsa04350; PMID:26893264
ClusterOPCs	ClusterGABA_neurons	BMP7	ACVR1_ACVR2A	0.00336867	0	BMP7_ACVR1_ACVR2A	BMP7 - (ACVR1+ACVR2A)	BMP	Secreted Signaling	KEGG: hsa04350; PMID:26893264
ClusterAstrocytes	ClusterImmature	BMP7	ACVR1_ACVR2A	0.00872485	0	BMP7_ACVR1_ACVR2A	BMP7 - (ACVR1+ACVR2A)	BMP	Secreted Signaling	KEGG: hsa04350; PMID:26893264
ClusterCA2-4_neurons	ClusterImmature	BMP7	ACVR1_ACVR2A	0.00241052	0	BMP7_ACVR1_ACVR2A	BMP7 - (ACVR1+ACVR2A)	BMP	Secreted Signaling	KEGG: hsa04350; PMID:26893264
ClusterEpendymal	ClusterImmature	BMP7	ACVR1_ACVR2A	0.0178928	0	BMP7_ACVR1_ACVR2A	BMP7 - (ACVR1+ACVR2A)	BMP	Secreted Signaling	KEGG: hsa04350; PMID:26893264
ClusterNeural Stem	ClusterImmature	BMP7	ACVR1_ACVR2A	0.00749035	0	BMP7_ACVR1_ACVR2A	BMP7 - (ACVR1+ACVR2A)	BMP	Secreted Signaling	KEGG: hsa04350; PMID:26893264
ClusterOPCs	ClusterImmature	BMP7	ACVR1_ACVR2A	0.0112385	0	BMP7_ACVR1_ACVR2A	BMP7 - (ACVR1+ACVR2A)	BMP	Secreted Signaling	KEGG: hsa04350; PMID:26893264
ClusterAstrocytes	ClustermGC	BMP7	ACVR1_ACVR2A	0.00838933	0	BMP7_ACVR1_ACVR2A	BMP7 - (ACVR1+ACVR2A)	BMP	Secreted Signaling	KEGG: hsa04350; PMID:26893264
ClusterCA2-4_neurons	ClustermGC	BMP7	ACVR1_ACVR2A	0.00231649	0	BMP7_ACVR1_ACVR2A	BMP7 - (ACVR1+ACVR2A)	BMP	Secreted Signaling	KEGG: hsa04350; PMID:26893264
ClusterEpendymal	ClustermGC	BMP7	ACVR1_ACVR2A	0.0172192	0	BMP7_ACVR1_ACVR2A	BMP7 - (ACVR1+ACVR2A)	BMP	Secreted Signaling	KEGG: hsa04350; PMID:26893264
ClusterNeural Stem	ClustermGC	BMP7	ACVR1_ACVR2A	0.00720148	0	BMP7_ACVR1_ACVR2A	BMP7 - (ACVR1+ACVR2A)	BMP	Secreted Signaling	KEGG: hsa04350; PMID:26893264
ClusterOPCs	ClustermGC	BMP7	ACVR1_ACVR2A	0.0108088	0	BMP7_ACVR1_ACVR2A	BMP7 - (ACVR1+ACVR2A)	BMP	Secreted Signaling	KEGG: hsa04350; PMID:26893264
ClusterAstrocytes	ClusterGABA_neurons	BMP7	ACVR1_ACVR2B	0.000965941	0	BMP7_ACVR1_ACVR2B	BMP7 - (ACVR1+ACVR2B)	BMP	Secreted Signaling	KEGG: hsa04350; PMID:26893264
ClusterCA2-4_neurons	ClusterGABA_neurons	BMP7	ACVR1_ACVR2B	0.000265298	0	BMP7_ACVR1_ACVR2B	BMP7 - (ACVR1+ACVR2B)	BMP	Secreted Signaling	KEGG: hsa04350; PMID:26893264
ClusterEpendymal	ClusterGABA_neurons	BMP7	ACVR1_ACVR2B	0.00199832	0	BMP7_ACVR1_ACVR2B	BMP7 - (ACVR1+ACVR2B)	BMP	Secreted Signaling	KEGG: hsa04350; PMID:26893264
ClusterNeural Stem	ClusterGABA_neurons	BMP7	ACVR1_ACVR2B	0.000828297	0	BMP7_ACVR1_ACVR2B	BMP7 - (ACVR1+ACVR2B)	BMP	Secreted Signaling	KEGG: hsa04350; PMID:26893264
ClusterOPCs	ClusterGABA_neurons	BMP7	ACVR1_ACVR2B	0.00124721	0	BMP7_ACVR1_ACVR2B	BMP7 - (ACVR1+ACVR2B)	BMP	Secreted Signaling	KEGG: hsa04350; PMID:26893264
ClusterAstrocytes	ClusterCA2-4_neurons	BMP7	ACVR1_BMPR2	0.00829637	0	BMP7_ACVR1_BMPR2	BMP7 - (ACVR1+BMPR2)	BMP	Secreted Signaling	KEGG: hsa04350; PMID:26893264
ClusterCA2-4_neurons	ClusterCA2-4_neurons	BMP7	ACVR1_BMPR2	0.00229103	0	BMP7_ACVR1_BMPR2	BMP7 - (ACVR1+BMPR2)	BMP	Secreted Signaling	KEGG: hsa04350; PMID:26893264
ClusterEpendymal	ClusterCA2-4_neurons	BMP7	ACVR1_BMPR2	0.0170262	0	BMP7_ACVR1_BMPR2	BMP7 - (ACVR1+BMPR2)	BMP	Secreted Signaling	KEGG: hsa04350; PMID:26893264
ClusterNeural Stem	ClusterCA2-4_neurons	BMP7	ACVR1_BMPR2	0.00712182	0	BMP7_ACVR1_BMPR2	BMP7 - (ACVR1+BMPR2)	BMP	Secreted Signaling	KEGG: hsa04350; PMID:26893264
ClusterOPCs	ClusterCA2-4_neurons	BMP7	ACVR1_BMPR2	0.0106887	0	BMP7_ACVR1_BMPR2	BMP7 - (ACVR1+BMPR2)	BMP	Secreted Signaling	KEGG: hsa04350; PMID:26893264
ClusterAstrocytes	ClusterCA_neurons	BMP7	ACVR1_BMPR2	0.00651108	0	BMP7_ACVR1_BMPR2	BMP7 - (ACVR1+BMPR2)	BMP	Secreted Signaling	KEGG: hsa04350; PMID:26893264
ClusterCA2-4_neurons	ClusterCA_neurons	BMP7	ACVR1_BMPR2	0.00179542	0	BMP7_ACVR1_BMPR2	BMP7 - (ACVR1+BMPR2)	BMP	Secreted Signaling	KEGG: hsa04350; PMID:26893264
ClusterEpendymal	ClusterCA_neurons	BMP7	ACVR1_BMPR2	0.0133908	0	BMP7_ACVR1_BMPR2	BMP7 - (ACVR1+BMPR2)	BMP	Secreted Signaling	KEGG: hsa04350; PMID:26893264
ClusterNeural Stem	ClusterCA_neurons	BMP7	ACVR1_BMPR2	0.00558768	0	BMP7_ACVR1_BMPR2	BMP7 - (ACVR1+BMPR2)	BMP	Secreted Signaling	KEGG: hsa04350; PMID:26893264
ClusterOPCs	ClusterCA_neurons	BMP7	ACVR1_BMPR2	0.00839347	0	BMP7_ACVR1_BMPR2	BMP7 - (ACVR1+BMPR2)	BMP	Secreted Signaling	KEGG: hsa04350; PMID:26893264
ClusterAstrocytes	ClusterEndothelial	BMP7	ACVR1_BMPR2	0.0103148	0	BMP7_ACVR1_BMPR2	BMP7 - (ACVR1+BMPR2)	BMP	Secreted Signaling	KEGG: hsa04350; PMID:26893264
ClusterCA2-4_neurons	ClusterEndothelial	BMP7	ACVR1_BMPR2	0.00285256	0	BMP7_ACVR1_BMPR2	BMP7 - (ACVR1+BMPR2)	BMP	Secreted Signaling	KEGG: hsa04350; PMID:26893264
ClusterEpendymal	ClusterEndothelial	BMP7	ACVR1_BMPR2	0.0211234	0	BMP7_ACVR1_BMPR2	BMP7 - (ACVR1+BMPR2)	BMP	Secreted Signaling	KEGG: hsa04350; PMID:26893264
ClusterNeural Stem	ClusterEndothelial	BMP7	ACVR1_BMPR2	0.00885703	0	BMP7_ACVR1_BMPR2	BMP7 - (ACVR1+BMPR2)	BMP	Secreted Signaling	KEGG: hsa04350; PMID:26893264
ClusterOPCs	ClusterEndothelial	BMP7	ACVR1_BMPR2	0.0132814	0	BMP7_ACVR1_BMPR2	BMP7 - (ACVR1+BMPR2)	BMP	Secreted Signaling	KEGG: hsa04350; PMID:26893264
ClusterAstrocytes	ClusterEpendymal	BMP7	ACVR1_BMPR2	0.00364035	0	BMP7_ACVR1_BMPR2	BMP7 - (ACVR1+BMPR2)	BMP	Secreted Signaling	KEGG: hsa04350; PMID:26893264
ClusterCA2-4_neurons	ClusterEpendymal	BMP7	ACVR1_BMPR2	0.00100175	0	BMP7_ACVR1_BMPR2	BMP7 - (ACVR1+BMPR2)	BMP	Secreted Signaling	KEGG: hsa04350; PMID:26893264
ClusterEpendymal	ClusterEpendymal	BMP7	ACVR1_BMPR2	0.00750972	0	BMP7_ACVR1_BMPR2	BMP7 - (ACVR1+BMPR2)	BMP	Secreted Signaling	KEGG: hsa04350; PMID:26893264
ClusterNeural Stem	ClusterEpendymal	BMP7	ACVR1_BMPR2	0.0031228	0	BMP7_ACVR1_BMPR2	BMP7 - (ACVR1+BMPR2)	BMP	Secreted Signaling	KEGG: hsa04350; PMID:26893264
ClusterOPCs	ClusterEpendymal	BMP7	ACVR1_BMPR2	0.00469672	0	BMP7_ACVR1_BMPR2	BMP7 - (ACVR1+BMPR2)	BMP	Secreted Signaling	KEGG: hsa04350; PMID:26893264
ClusterAstrocytes	ClusterGABA_neurons	BMP7	ACVR1_BMPR2	0.00399341	0	BMP7_ACVR1_BMPR2	BMP7 - (ACVR1+BMPR2)	BMP	Secreted Signaling	KEGG: hsa04350; PMID:26893264
ClusterCA2-4_neurons	ClusterGABA_neurons	BMP7	ACVR1_BMPR2	0.00109923	0	BMP7_ACVR1_BMPR2	BMP7 - (ACVR1+BMPR2)	BMP	Secreted Signaling	KEGG: hsa04350; PMID:26893264
ClusterEpendymal	ClusterGABA_neurons	BMP7	ACVR1_BMPR2	0.00823445	0	BMP7_ACVR1_BMPR2	BMP7 - (ACVR1+BMPR2)	BMP	Secreted Signaling	KEGG: hsa04350; PMID:26893264
ClusterNeural Stem	ClusterGABA_neurons	BMP7	ACVR1_BMPR2	0.00342586	0	BMP7_ACVR1_BMPR2	BMP7 - (ACVR1+BMPR2)	BMP	Secreted Signaling	KEGG: hsa04350; PMID:26893264
ClusterOPCs	ClusterGABA_neurons	BMP7	ACVR1_BMPR2	0.00515162	0	BMP7_ACVR1_BMPR2	BMP7 - (ACVR1+BMPR2)	BMP	Secreted Signaling	KEGG: hsa04350; PMID:26893264
ClusterAstrocytes	ClusterImmature	BMP7	ACVR1_BMPR2	0.00982765	0	BMP7_ACVR1_BMPR2	BMP7 - (ACVR1+BMPR2)	BMP	Secreted Signaling	KEGG: hsa04350; PMID:26893264
ClusterCA2-4_neurons	ClusterImmature	BMP7	ACVR1_BMPR2	0.00271749	0	BMP7_ACVR1_BMPR2	BMP7 - (ACVR1+BMPR2)	BMP	Secreted Signaling	KEGG: hsa04350; PMID:26893264
ClusterEpendymal	ClusterImmature	BMP7	ACVR1_BMPR2	0.0201296	0	BMP7_ACVR1_BMPR2	BMP7 - (ACVR1+BMPR2)	BMP	Secreted Signaling	KEGG: hsa04350; PMID:26893264
ClusterNeural Stem	ClusterImmature	BMP7	ACVR1_BMPR2	0.00843852	0	BMP7_ACVR1_BMPR2	BMP7 - (ACVR1+BMPR2)	BMP	Secreted Signaling	KEGG: hsa04350; PMID:26893264
ClusterOPCs	ClusterImmature	BMP7	ACVR1_BMPR2	0.0126548	0	BMP7_ACVR1_BMPR2	BMP7 - (ACVR1+BMPR2)	BMP	Secreted Signaling	KEGG: hsa04350; PMID:26893264
ClusterAstrocytes	ClusterNeural Stem	BMP7	ACVR1_BMPR2	0.00351611	0	BMP7_ACVR1_BMPR2	BMP7 - (ACVR1+BMPR2)	BMP	Secreted Signaling	KEGG: hsa04350; PMID:26893264
ClusterCA2-4_neurons	ClusterNeural Stem	BMP7	ACVR1_BMPR2	0.000967474	0	BMP7_ACVR1_BMPR2	BMP7 - (ACVR1+BMPR2)	BMP	Secreted Signaling	KEGG: hsa04350; PMID:26893264
ClusterEpendymal	ClusterNeural Stem	BMP7	ACVR1_BMPR2	0.00725439	0	BMP7_ACVR1_BMPR2	BMP7 - (ACVR1+BMPR2)	BMP	Secreted Signaling	KEGG: hsa04350; PMID:26893264
ClusterNeural Stem	ClusterNeural Stem	BMP7	ACVR1_BMPR2	0.00301617	0	BMP7_ACVR1_BMPR2	BMP7 - (ACVR1+BMPR2)	BMP	Secreted Signaling	KEGG: hsa04350; PMID:26893264
ClusterOPCs	ClusterNeural Stem	BMP7	ACVR1_BMPR2	0.0045366	0	BMP7_ACVR1_BMPR2	BMP7 - (ACVR1+BMPR2)	BMP	Secreted Signaling	KEGG: hsa04350; PMID:26893264
ClusterAstrocytes	ClustermGC	BMP7	ACVR1_BMPR2	0.0107041	0	BMP7_ACVR1_BMPR2	BMP7 - (ACVR1+BMPR2)	BMP	Secreted Signaling	KEGG: hsa04350; PMID:26893264
ClusterCA2-4_neurons	ClustermGC	BMP7	ACVR1_BMPR2	0.0029606	0	BMP7_ACVR1_BMPR2	BMP7 - (ACVR1+BMPR2)	BMP	Secreted Signaling	KEGG: hsa04350; PMID:26893264
ClusterEpendymal	ClustermGC	BMP7	ACVR1_BMPR2	0.0219164	0	BMP7_ACVR1_BMPR2	BMP7 - (ACVR1+BMPR2)	BMP	Secreted Signaling	KEGG: hsa04350; PMID:26893264
ClusterNeural Stem	ClustermGC	BMP7	ACVR1_BMPR2	0.00919152	0	BMP7_ACVR1_BMPR2	BMP7 - (ACVR1+BMPR2)	BMP	Secreted Signaling	KEGG: hsa04350; PMID:26893264
ClusterOPCs	ClustermGC	BMP7	ACVR1_BMPR2	0.0137819	0	BMP7_ACVR1_BMPR2	BMP7 - (ACVR1+BMPR2)	BMP	Secreted Signaling	KEGG: hsa04350; PMID:26893264
ClusterAstrocytes	ClusterCA2-4_neurons	BMP7	BMPR1A_ACVR2A	0.00461503	0	BMP7_BMPR1A_ACVR2A	BMP7 - (BMPR1A+ACVR2A)	BMP	Secreted Signaling	KEGG: hsa04350; PMID:26893264
ClusterCA2-4_neurons	ClusterCA2-4_neurons	BMP7	BMPR1A_ACVR2A	0.00127096	0	BMP7_BMPR1A_ACVR2A	BMP7 - (BMPR1A+ACVR2A)	BMP	Secreted Signaling	KEGG: hsa04350; PMID:26893264
ClusterEpendymal	ClusterCA2-4_neurons	BMP7	BMPR1A_ACVR2A	0.00950928	0	BMP7_BMPR1A_ACVR2A	BMP7 - (BMPR1A+ACVR2A)	BMP	Secreted Signaling	KEGG: hsa04350; PMID:26893264
ClusterNeural Stem	ClusterCA2-4_neurons	BMP7	BMPR1A_ACVR2A	0.00395952	0	BMP7_BMPR1A_ACVR2A	BMP7 - (BMPR1A+ACVR2A)	BMP	Secreted Signaling	KEGG: hsa04350; PMID:26893264
ClusterOPCs	ClusterCA2-4_neurons	BMP7	BMPR1A_ACVR2A	0.00595234	0	BMP7_BMPR1A_ACVR2A	BMP7 - (BMPR1A+ACVR2A)	BMP	Secreted Signaling	KEGG: hsa04350; PMID:26893264
ClusterAstrocytes	ClusterCA_neurons	BMP7	BMPR1A_ACVR2A	0.0047645	0	BMP7_BMPR1A_ACVR2A	BMP7 - (BMPR1A+ACVR2A)	BMP	Secreted Signaling	KEGG: hsa04350; PMID:26893264
ClusterCA2-4_neurons	ClusterCA_neurons	BMP7	BMPR1A_ACVR2A	0.00131215	0	BMP7_BMPR1A_ACVR2A	BMP7 - (BMPR1A+ACVR2A)	BMP	Secreted Signaling	KEGG: hsa04350; PMID:26893264
ClusterEpendymal	ClusterCA_neurons	BMP7	BMPR1A_ACVR2A	0.00981698	0	BMP7_BMPR1A_ACVR2A	BMP7 - (BMPR1A+ACVR2A)	BMP	Secreted Signaling	KEGG: hsa04350; PMID:26893264
ClusterNeural Stem	ClusterCA_neurons	BMP7	BMPR1A_ACVR2A	0.00408778	0	BMP7_BMPR1A_ACVR2A	BMP7 - (BMPR1A+ACVR2A)	BMP	Secreted Signaling	KEGG: hsa04350; PMID:26893264
ClusterOPCs	ClusterCA_neurons	BMP7	BMPR1A_ACVR2A	0.00614507	0	BMP7_BMPR1A_ACVR2A	BMP7 - (BMPR1A+ACVR2A)	BMP	Secreted Signaling	KEGG: hsa04350; PMID:26893264
ClusterAstrocytes	ClusterEndothelial	BMP7	BMPR1A_ACVR2A	0.00201658	0	BMP7_BMPR1A_ACVR2A	BMP7 - (BMPR1A+ACVR2A)	BMP	Secreted Signaling	KEGG: hsa04350; PMID:26893264
ClusterCA2-4_neurons	ClusterEndothelial	BMP7	BMPR1A_ACVR2A	0.000554288	0	BMP7_BMPR1A_ACVR2A	BMP7 - (BMPR1A+ACVR2A)	BMP	Secreted Signaling	KEGG: hsa04350; PMID:26893264
ClusterEpendymal	ClusterEndothelial	BMP7	BMPR1A_ACVR2A	0.00416706	0	BMP7_BMPR1A_ACVR2A	BMP7 - (BMPR1A+ACVR2A)	BMP	Secreted Signaling	KEGG: hsa04350; PMID:26893264
ClusterNeural Stem	ClusterEndothelial	BMP7	BMPR1A_ACVR2A	0.00172949	0	BMP7_BMPR1A_ACVR2A	BMP7 - (BMPR1A+ACVR2A)	BMP	Secreted Signaling	KEGG: hsa04350; PMID:26893264
ClusterOPCs	ClusterEndothelial	BMP7	BMPR1A_ACVR2A	0.00260295	0	BMP7_BMPR1A_ACVR2A	BMP7 - (BMPR1A+ACVR2A)	BMP	Secreted Signaling	KEGG: hsa04350; PMID:26893264
ClusterAstrocytes	ClusterEpendymal	BMP7	BMPR1A_ACVR2A	0.00378157	0	BMP7_BMPR1A_ACVR2A	BMP7 - (BMPR1A+ACVR2A)	BMP	Secreted Signaling	KEGG: hsa04350; PMID:26893264
ClusterCA2-4_neurons	ClusterEpendymal	BMP7	BMPR1A_ACVR2A	0.00104072	0	BMP7_BMPR1A_ACVR2A	BMP7 - (BMPR1A+ACVR2A)	BMP	Secreted Signaling	KEGG: hsa04350; PMID:26893264
ClusterEpendymal	ClusterEpendymal	BMP7	BMPR1A_ACVR2A	0.00779988	0	BMP7_BMPR1A_ACVR2A	BMP7 - (BMPR1A+ACVR2A)	BMP	Secreted Signaling	KEGG: hsa04350; PMID:26893264
ClusterNeural Stem	ClusterEpendymal	BMP7	BMPR1A_ACVR2A	0.00324401	0	BMP7_BMPR1A_ACVR2A	BMP7 - (BMPR1A+ACVR2A)	BMP	Secreted Signaling	KEGG: hsa04350; PMID:26893264
ClusterOPCs	ClusterEpendymal	BMP7	BMPR1A_ACVR2A	0.00487873	0	BMP7_BMPR1A_ACVR2A	BMP7 - (BMPR1A+ACVR2A)	BMP	Secreted Signaling	KEGG: hsa04350; PMID:26893264
ClusterAstrocytes	ClusterGABA_neurons	BMP7	BMPR1A_ACVR2A	0.00544476	0	BMP7_BMPR1A_ACVR2A	BMP7 - (BMPR1A+ACVR2A)	BMP	Secreted Signaling	KEGG: hsa04350; PMID:26893264
ClusterCA2-4_neurons	ClusterGABA_neurons	BMP7	BMPR1A_ACVR2A	0.00150032	0	BMP7_BMPR1A_ACVR2A	BMP7 - (BMPR1A+ACVR2A)	BMP	Secreted Signaling	KEGG: hsa04350; PMID:26893264
ClusterEpendymal	ClusterGABA_neurons	BMP7	BMPR1A_ACVR2A	0.0112096	0	BMP7_BMPR1A_ACVR2A	BMP7 - (BMPR1A+ACVR2A)	BMP	Secreted Signaling	KEGG: hsa04350; PMID:26893264
ClusterNeural Stem	ClusterGABA_neurons	BMP7	BMPR1A_ACVR2A	0.00467193	0	BMP7_BMPR1A_ACVR2A	BMP7 - (BMPR1A+ACVR2A)	BMP	Secreted Signaling	KEGG: hsa04350; PMID:26893264
ClusterOPCs	ClusterGABA_neurons	BMP7	BMPR1A_ACVR2A	0.0070209	0	BMP7_BMPR1A_ACVR2A	BMP7 - (BMPR1A+ACVR2A)	BMP	Secreted Signaling	KEGG: hsa04350; PMID:26893264
ClusterAstrocytes	ClusterImmature	BMP7	BMPR1A_ACVR2A	0.00770245	0	BMP7_BMPR1A_ACVR2A	BMP7 - (BMPR1A+ACVR2A)	BMP	Secreted Signaling	KEGG: hsa04350; PMID:26893264
ClusterCA2-4_neurons	ClusterImmature	BMP7	BMPR1A_ACVR2A	0.0021264	0	BMP7_BMPR1A_ACVR2A	BMP7 - (BMPR1A+ACVR2A)	BMP	Secreted Signaling	KEGG: hsa04350; PMID:26893264
ClusterEpendymal	ClusterImmature	BMP7	BMPR1A_ACVR2A	0.0158141	0	BMP7_BMPR1A_ACVR2A	BMP7 - (BMPR1A+ACVR2A)	BMP	Secreted Signaling	KEGG: hsa04350; PMID:26893264
ClusterNeural Stem	ClusterImmature	BMP7	BMPR1A_ACVR2A	0.0066116	0	BMP7_BMPR1A_ACVR2A	BMP7 - (BMPR1A+ACVR2A)	BMP	Secreted Signaling	KEGG: hsa04350; PMID:26893264
ClusterOPCs	ClusterImmature	BMP7	BMPR1A_ACVR2A	0.00992467	0	BMP7_BMPR1A_ACVR2A	BMP7 - (BMPR1A+ACVR2A)	BMP	Secreted Signaling	KEGG: hsa04350; PMID:26893264
ClusterAstrocytes	ClusterOPCs	BMP7	BMPR1A_ACVR2A	0.00307478	0	BMP7_BMPR1A_ACVR2A	BMP7 - (BMPR1A+ACVR2A)	BMP	Secreted Signaling	KEGG: hsa04350; PMID:26893264
ClusterCA2-4_neurons	ClusterOPCs	BMP7	BMPR1A_ACVR2A	0.000845771	0	BMP7_BMPR1A_ACVR2A	BMP7 - (BMPR1A+ACVR2A)	BMP	Secreted Signaling	KEGG: hsa04350; PMID:26893264
ClusterEpendymal	ClusterOPCs	BMP7	BMPR1A_ACVR2A	0.00634684	0	BMP7_BMPR1A_ACVR2A	BMP7 - (BMPR1A+ACVR2A)	BMP	Secreted Signaling	KEGG: hsa04350; PMID:26893264
ClusterNeural Stem	ClusterOPCs	BMP7	BMPR1A_ACVR2A	0.00263742	0	BMP7_BMPR1A_ACVR2A	BMP7 - (BMPR1A+ACVR2A)	BMP	Secreted Signaling	KEGG: hsa04350; PMID:26893264
ClusterOPCs	ClusterOPCs	BMP7	BMPR1A_ACVR2A	0.00396769	0	BMP7_BMPR1A_ACVR2A	BMP7 - (BMPR1A+ACVR2A)	BMP	Secreted Signaling	KEGG: hsa04350; PMID:26893264
ClusterAstrocytes	ClustermGC	BMP7	BMPR1A_ACVR2A	0.00711286	0	BMP7_BMPR1A_ACVR2A	BMP7 - (BMPR1A+ACVR2A)	BMP	Secreted Signaling	KEGG: hsa04350; PMID:26893264
ClusterCA2-4_neurons	ClustermGC	BMP7	BMPR1A_ACVR2A	0.00196222	0	BMP7_BMPR1A_ACVR2A	BMP7 - (BMPR1A+ACVR2A)	BMP	Secreted Signaling	KEGG: hsa04350; PMID:26893264
ClusterEpendymal	ClustermGC	BMP7	BMPR1A_ACVR2A	0.0146191	0	BMP7_BMPR1A_ACVR2A	BMP7 - (BMPR1A+ACVR2A)	BMP	Secreted Signaling	KEGG: hsa04350; PMID:26893264
ClusterNeural Stem	ClustermGC	BMP7	BMPR1A_ACVR2A	0.00610464	0	BMP7_BMPR1A_ACVR2A	BMP7 - (BMPR1A+ACVR2A)	BMP	Secreted Signaling	KEGG: hsa04350; PMID:26893264
ClusterOPCs	ClustermGC	BMP7	BMPR1A_ACVR2A	0.00916763	0	BMP7_BMPR1A_ACVR2A	BMP7 - (BMPR1A+ACVR2A)	BMP	Secreted Signaling	KEGG: hsa04350; PMID:26893264
ClusterAstrocytes	ClusterGABA_neurons	BMP7	BMPR1A_ACVR2B	0.00201854	0	BMP7_BMPR1A_ACVR2B	BMP7 - (BMPR1A+ACVR2B)	BMP	Secreted Signaling	KEGG: hsa04350; PMID:26893264
ClusterCA2-4_neurons	ClusterGABA_neurons	BMP7	BMPR1A_ACVR2B	0.000554824	0	BMP7_BMPR1A_ACVR2B	BMP7 - (BMPR1A+ACVR2B)	BMP	Secreted Signaling	KEGG: hsa04350; PMID:26893264
ClusterEpendymal	ClusterGABA_neurons	BMP7	BMPR1A_ACVR2B	0.00417116	0	BMP7_BMPR1A_ACVR2B	BMP7 - (BMPR1A+ACVR2B)	BMP	Secreted Signaling	KEGG: hsa04350; PMID:26893264
ClusterNeural Stem	ClusterGABA_neurons	BMP7	BMPR1A_ACVR2B	0.00173117	0	BMP7_BMPR1A_ACVR2B	BMP7 - (BMPR1A+ACVR2B)	BMP	Secreted Signaling	KEGG: hsa04350; PMID:26893264
ClusterOPCs	ClusterGABA_neurons	BMP7	BMPR1A_ACVR2B	0.0026055	0	BMP7_BMPR1A_ACVR2B	BMP7 - (BMPR1A+ACVR2B)	BMP	Secreted Signaling	KEGG: hsa04350; PMID:26893264
ClusterAstrocytes	ClusterAstrocytes	BMP7	BMPR1A_BMPR2	0.0091503	0	BMP7_BMPR1A_BMPR2	BMP7 - (BMPR1A+BMPR2)	BMP	Secreted Signaling	KEGG: hsa04350; PMID:26893264
ClusterCA2-4_neurons	ClusterAstrocytes	BMP7	BMPR1A_BMPR2	0.002528	0	BMP7_BMPR1A_BMPR2	BMP7 - (BMPR1A+BMPR2)	BMP	Secreted Signaling	KEGG: hsa04350; PMID:26893264
ClusterEpendymal	ClusterAstrocytes	BMP7	BMPR1A_BMPR2	0.018766	0	BMP7_BMPR1A_BMPR2	BMP7 - (BMPR1A+BMPR2)	BMP	Secreted Signaling	KEGG: hsa04350; PMID:26893264
ClusterNeural Stem	ClusterAstrocytes	BMP7	BMPR1A_BMPR2	0.00785557	0	BMP7_BMPR1A_BMPR2	BMP7 - (BMPR1A+BMPR2)	BMP	Secreted Signaling	KEGG: hsa04350; PMID:26893264
ClusterOPCs	ClusterAstrocytes	BMP7	BMPR1A_BMPR2	0.0117867	0	BMP7_BMPR1A_BMPR2	BMP7 - (BMPR1A+BMPR2)	BMP	Secreted Signaling	KEGG: hsa04350; PMID:26893264
ClusterAstrocytes	ClusterCA2-4_neurons	BMP7	BMPR1A_BMPR2	0.00630922	0	BMP7_BMPR1A_BMPR2	BMP7 - (BMPR1A+BMPR2)	BMP	Secreted Signaling	KEGG: hsa04350; PMID:26893264
ClusterCA2-4_neurons	ClusterCA2-4_neurons	BMP7	BMPR1A_BMPR2	0.00173972	0	BMP7_BMPR1A_BMPR2	BMP7 - (BMPR1A+BMPR2)	BMP	Secreted Signaling	KEGG: hsa04350; PMID:26893264
ClusterEpendymal	ClusterCA2-4_neurons	BMP7	BMPR1A_BMPR2	0.0129761	0	BMP7_BMPR1A_BMPR2	BMP7 - (BMPR1A+BMPR2)	BMP	Secreted Signaling	KEGG: hsa04350; PMID:26893264
ClusterNeural Stem	ClusterCA2-4_neurons	BMP7	BMPR1A_BMPR2	0.00541442	0	BMP7_BMPR1A_BMPR2	BMP7 - (BMPR1A+BMPR2)	BMP	Secreted Signaling	KEGG: hsa04350; PMID:26893264
ClusterOPCs	ClusterCA2-4_neurons	BMP7	BMPR1A_BMPR2	0.00813334	0	BMP7_BMPR1A_BMPR2	BMP7 - (BMPR1A+BMPR2)	BMP	Secreted Signaling	KEGG: hsa04350; PMID:26893264
ClusterAstrocytes	ClusterCA_neurons	BMP7	BMPR1A_BMPR2	0.00751604	0	BMP7_BMPR1A_BMPR2	BMP7 - (BMPR1A+BMPR2)	BMP	Secreted Signaling	KEGG: hsa04350; PMID:26893264
ClusterCA2-4_neurons	ClusterCA_neurons	BMP7	BMPR1A_BMPR2	0.00207405	0	BMP7_BMPR1A_BMPR2	BMP7 - (BMPR1A+BMPR2)	BMP	Secreted Signaling	KEGG: hsa04350; PMID:26893264
ClusterEpendymal	ClusterCA_neurons	BMP7	BMPR1A_BMPR2	0.0154411	0	BMP7_BMPR1A_BMPR2	BMP7 - (BMPR1A+BMPR2)	BMP	Secreted Signaling	KEGG: hsa04350; PMID:26893264
ClusterNeural Stem	ClusterCA_neurons	BMP7	BMPR1A_BMPR2	0.00645104	0	BMP7_BMPR1A_BMPR2	BMP7 - (BMPR1A+BMPR2)	BMP	Secreted Signaling	KEGG: hsa04350; PMID:26893264
ClusterOPCs	ClusterCA_neurons	BMP7	BMPR1A_BMPR2	0.00968615	0	BMP7_BMPR1A_BMPR2	BMP7 - (BMPR1A+BMPR2)	BMP	Secreted Signaling	KEGG: hsa04350; PMID:26893264
ClusterAstrocytes	ClusterEndothelial	BMP7	BMPR1A_BMPR2	0.00637026	0	BMP7_BMPR1A_BMPR2	BMP7 - (BMPR1A+BMPR2)	BMP	Secreted Signaling	KEGG: hsa04350; PMID:26893264
ClusterCA2-4_neurons	ClusterEndothelial	BMP7	BMPR1A_BMPR2	0.00175658	0	BMP7_BMPR1A_BMPR2	BMP7 - (BMPR1A+BMPR2)	BMP	Secreted Signaling	KEGG: hsa04350; PMID:26893264
ClusterEpendymal	ClusterEndothelial	BMP7	BMPR1A_BMPR2	0.0131013	0	BMP7_BMPR1A_BMPR2	BMP7 - (BMPR1A+BMPR2)	BMP	Secreted Signaling	KEGG: hsa04350; PMID:26893264
ClusterNeural Stem	ClusterEndothelial	BMP7	BMPR1A_BMPR2	0.00546682	0	BMP7_BMPR1A_BMPR2	BMP7 - (BMPR1A+BMPR2)	BMP	Secreted Signaling	KEGG: hsa04350; PMID:26893264
ClusterOPCs	ClusterEndothelial	BMP7	BMPR1A_BMPR2	0.00821198	0	BMP7_BMPR1A_BMPR2	BMP7 - (BMPR1A+BMPR2)	BMP	Secreted Signaling	KEGG: hsa04350; PMID:26893264
ClusterAstrocytes	ClusterEpendymal	BMP7	BMPR1A_BMPR2	0.00838743	0	BMP7_BMPR1A_BMPR2	BMP7 - (BMPR1A+BMPR2)	BMP	Secreted Signaling	KEGG: hsa04350; PMID:26893264
ClusterCA2-4_neurons	ClusterEpendymal	BMP7	BMPR1A_BMPR2	0.00231596	0	BMP7_BMPR1A_BMPR2	BMP7 - (BMPR1A+BMPR2)	BMP	Secreted Signaling	KEGG: hsa04350; PMID:26893264
ClusterEpendymal	ClusterEpendymal	BMP7	BMPR1A_BMPR2	0.0172154	0	BMP7_BMPR1A_BMPR2	BMP7 - (BMPR1A+BMPR2)	BMP	Secreted Signaling	KEGG: hsa04350; PMID:26893264
ClusterNeural Stem	ClusterEpendymal	BMP7	BMPR1A_BMPR2	0.00719986	0	BMP7_BMPR1A_BMPR2	BMP7 - (BMPR1A+BMPR2)	BMP	Secreted Signaling	KEGG: hsa04350; PMID:26893264
ClusterOPCs	ClusterEpendymal	BMP7	BMPR1A_BMPR2	0.0108064	0	BMP7_BMPR1A_BMPR2	BMP7 - (BMPR1A+BMPR2)	BMP	Secreted Signaling	KEGG: hsa04350; PMID:26893264
ClusterAstrocytes	ClusterGABA_neurons	BMP7	BMPR1A_BMPR2	0.00831723	0	BMP7_BMPR1A_BMPR2	BMP7 - (BMPR1A+BMPR2)	BMP	Secreted Signaling	KEGG: hsa04350; PMID:26893264
ClusterCA2-4_neurons	ClusterGABA_neurons	BMP7	BMPR1A_BMPR2	0.00229666	0	BMP7_BMPR1A_BMPR2	BMP7 - (BMPR1A+BMPR2)	BMP	Secreted Signaling	KEGG: hsa04350; PMID:26893264
ClusterEpendymal	ClusterGABA_neurons	BMP7	BMPR1A_BMPR2	0.0170704	0	BMP7_BMPR1A_BMPR2	BMP7 - (BMPR1A+BMPR2)	BMP	Secreted Signaling	KEGG: hsa04350; PMID:26893264
ClusterNeural Stem	ClusterGABA_neurons	BMP7	BMPR1A_BMPR2	0.00713964	0	BMP7_BMPR1A_BMPR2	BMP7 - (BMPR1A+BMPR2)	BMP	Secreted Signaling	KEGG: hsa04350; PMID:26893264
ClusterOPCs	ClusterGABA_neurons	BMP7	BMPR1A_BMPR2	0.0107158	0	BMP7_BMPR1A_BMPR2	BMP7 - (BMPR1A+BMPR2)	BMP	Secreted Signaling	KEGG: hsa04350; PMID:26893264
ClusterAstrocytes	ClusterImmature	BMP7	BMPR1A_BMPR2	0.00867722	0	BMP7_BMPR1A_BMPR2	BMP7 - (BMPR1A+BMPR2)	BMP	Secreted Signaling	KEGG: hsa04350; PMID:26893264
ClusterCA2-4_neurons	ClusterImmature	BMP7	BMPR1A_BMPR2	0.00239728	0	BMP7_BMPR1A_BMPR2	BMP7 - (BMPR1A+BMPR2)	BMP	Secreted Signaling	KEGG: hsa04350; PMID:26893264
ClusterEpendymal	ClusterImmature	BMP7	BMPR1A_BMPR2	0.017796	0	BMP7_BMPR1A_BMPR2	BMP7 - (BMPR1A+BMPR2)	BMP	Secreted Signaling	KEGG: hsa04350; PMID:26893264
ClusterNeural Stem	ClusterImmature	BMP7	BMPR1A_BMPR2	0.00744941	0	BMP7_BMPR1A_BMPR2	BMP7 - (BMPR1A+BMPR2)	BMP	Secreted Signaling	KEGG: hsa04350; PMID:26893264
ClusterOPCs	ClusterImmature	BMP7	BMPR1A_BMPR2	0.0111773	0	BMP7_BMPR1A_BMPR2	BMP7 - (BMPR1A+BMPR2)	BMP	Secreted Signaling	KEGG: hsa04350; PMID:26893264
ClusterAstrocytes	ClusterMicroglia	BMP7	BMPR1A_BMPR2	0.00358948	0	BMP7_BMPR1A_BMPR2	BMP7 - (BMPR1A+BMPR2)	BMP	Secreted Signaling	KEGG: hsa04350; PMID:26893264
ClusterCA2-4_neurons	ClusterMicroglia	BMP7	BMPR1A_BMPR2	0.000987713	0	BMP7_BMPR1A_BMPR2	BMP7 - (BMPR1A+BMPR2)	BMP	Secreted Signaling	KEGG: hsa04350; PMID:26893264
ClusterEpendymal	ClusterMicroglia	BMP7	BMPR1A_BMPR2	0.00740518	0	BMP7_BMPR1A_BMPR2	BMP7 - (BMPR1A+BMPR2)	BMP	Secreted Signaling	KEGG: hsa04350; PMID:26893264
ClusterNeural Stem	ClusterMicroglia	BMP7	BMPR1A_BMPR2	0.00307913	0	BMP7_BMPR1A_BMPR2	BMP7 - (BMPR1A+BMPR2)	BMP	Secreted Signaling	KEGG: hsa04350; PMID:26893264
ClusterOPCs	ClusterMicroglia	BMP7	BMPR1A_BMPR2	0.00463116	0	BMP7_BMPR1A_BMPR2	BMP7 - (BMPR1A+BMPR2)	BMP	Secreted Signaling	KEGG: hsa04350; PMID:26893264
ClusterAstrocytes	ClusterNeural Stem	BMP7	BMPR1A_BMPR2	0.0115202	0	BMP7_BMPR1A_BMPR2	BMP7 - (BMPR1A+BMPR2)	BMP	Secreted Signaling	KEGG: hsa04350; PMID:26893264
ClusterCA2-4_neurons	ClusterNeural Stem	BMP7	BMPR1A_BMPR2	0.0031882	0	BMP7_BMPR1A_BMPR2	BMP7 - (BMPR1A+BMPR2)	BMP	Secreted Signaling	KEGG: hsa04350; PMID:26893264
ClusterEpendymal	ClusterNeural Stem	BMP7	BMPR1A_BMPR2	0.023567	0	BMP7_BMPR1A_BMPR2	BMP7 - (BMPR1A+BMPR2)	BMP	Secreted Signaling	KEGG: hsa04350; PMID:26893264
ClusterNeural Stem	ClusterNeural Stem	BMP7	BMPR1A_BMPR2	0.00989344	0	BMP7_BMPR1A_BMPR2	BMP7 - (BMPR1A+BMPR2)	BMP	Secreted Signaling	KEGG: hsa04350; PMID:26893264
ClusterOPCs	ClusterNeural Stem	BMP7	BMPR1A_BMPR2	0.0148291	0	BMP7_BMPR1A_BMPR2	BMP7 - (BMPR1A+BMPR2)	BMP	Secreted Signaling	KEGG: hsa04350; PMID:26893264
ClusterAstrocytes	ClusterNeuroblast	BMP7	BMPR1A_BMPR2	0.00246599	0	BMP7_BMPR1A_BMPR2	BMP7 - (BMPR1A+BMPR2)	BMP	Secreted Signaling	KEGG: hsa04350; PMID:26893264
ClusterCA2-4_neurons	ClusterNeuroblast	BMP7	BMPR1A_BMPR2	0.000678015	0	BMP7_BMPR1A_BMPR2	BMP7 - (BMPR1A+BMPR2)	BMP	Secreted Signaling	KEGG: hsa04350; PMID:26893264
ClusterEpendymal	ClusterNeuroblast	BMP7	BMPR1A_BMPR2	0.0050935	0	BMP7_BMPR1A_BMPR2	BMP7 - (BMPR1A+BMPR2)	BMP	Secreted Signaling	KEGG: hsa04350; PMID:26893264
ClusterNeural Stem	ClusterNeuroblast	BMP7	BMPR1A_BMPR2	0.00211504	0	BMP7_BMPR1A_BMPR2	BMP7 - (BMPR1A+BMPR2)	BMP	Secreted Signaling	KEGG: hsa04350; PMID:26893264
ClusterOPCs	ClusterNeuroblast	BMP7	BMPR1A_BMPR2	0.00318267	0	BMP7_BMPR1A_BMPR2	BMP7 - (BMPR1A+BMPR2)	BMP	Secreted Signaling	KEGG: hsa04350; PMID:26893264
ClusterAstrocytes	ClusterOPCs	BMP7	BMPR1A_BMPR2	0.00505571	0	BMP7_BMPR1A_BMPR2	BMP7 - (BMPR1A+BMPR2)	BMP	Secreted Signaling	KEGG: hsa04350; PMID:26893264
ClusterCA2-4_neurons	ClusterOPCs	BMP7	BMPR1A_BMPR2	0.00139264	0	BMP7_BMPR1A_BMPR2	BMP7 - (BMPR1A+BMPR2)	BMP	Secreted Signaling	KEGG: hsa04350; PMID:26893264
ClusterEpendymal	ClusterOPCs	BMP7	BMPR1A_BMPR2	0.0104138	0	BMP7_BMPR1A_BMPR2	BMP7 - (BMPR1A+BMPR2)	BMP	Secreted Signaling	KEGG: hsa04350; PMID:26893264
ClusterNeural Stem	ClusterOPCs	BMP7	BMPR1A_BMPR2	0.00433781	0	BMP7_BMPR1A_BMPR2	BMP7 - (BMPR1A+BMPR2)	BMP	Secreted Signaling	KEGG: hsa04350; PMID:26893264
ClusterOPCs	ClusterOPCs	BMP7	BMPR1A_BMPR2	0.00652011	0	BMP7_BMPR1A_BMPR2	BMP7 - (BMPR1A+BMPR2)	BMP	Secreted Signaling	KEGG: hsa04350; PMID:26893264
ClusterAstrocytes	ClustermGC	BMP7	BMPR1A_BMPR2	0.00907863	0	BMP7_BMPR1A_BMPR2	BMP7 - (BMPR1A+BMPR2)	BMP	Secreted Signaling	KEGG: hsa04350; PMID:26893264
ClusterCA2-4_neurons	ClustermGC	BMP7	BMPR1A_BMPR2	0.00250807	0	BMP7_BMPR1A_BMPR2	BMP7 - (BMPR1A+BMPR2)	BMP	Secreted Signaling	KEGG: hsa04350; PMID:26893264
ClusterEpendymal	ClustermGC	BMP7	BMPR1A_BMPR2	0.0186204	0	BMP7_BMPR1A_BMPR2	BMP7 - (BMPR1A+BMPR2)	BMP	Secreted Signaling	KEGG: hsa04350; PMID:26893264
ClusterNeural Stem	ClustermGC	BMP7	BMPR1A_BMPR2	0.00779396	0	BMP7_BMPR1A_BMPR2	BMP7 - (BMPR1A+BMPR2)	BMP	Secreted Signaling	KEGG: hsa04350; PMID:26893264
ClusterOPCs	ClustermGC	BMP7	BMPR1A_BMPR2	0.0116946	0	BMP7_BMPR1A_BMPR2	BMP7 - (BMPR1A+BMPR2)	BMP	Secreted Signaling	KEGG: hsa04350; PMID:26893264
ClusterAstrocytes	ClusterCA2-4_neurons	BMP7	BMPR1B_ACVR2A	0.00141053	0	BMP7_BMPR1B_ACVR2A	BMP7 - (BMPR1B+ACVR2A)	BMP	Secreted Signaling	KEGG: hsa04350; PMID:26893264
ClusterCA2-4_neurons	ClusterCA2-4_neurons	BMP7	BMPR1B_ACVR2A	0.000387536	0	BMP7_BMPR1B_ACVR2A	BMP7 - (BMPR1B+ACVR2A)	BMP	Secreted Signaling	KEGG: hsa04350; PMID:26893264
ClusterEpendymal	ClusterCA2-4_neurons	BMP7	BMPR1B_ACVR2A	0.00291662	0	BMP7_BMPR1B_ACVR2A	BMP7 - (BMPR1B+ACVR2A)	BMP	Secreted Signaling	KEGG: hsa04350; PMID:26893264
ClusterNeural Stem	ClusterCA2-4_neurons	BMP7	BMPR1B_ACVR2A	0.00120961	0	BMP7_BMPR1B_ACVR2A	BMP7 - (BMPR1B+ACVR2A)	BMP	Secreted Signaling	KEGG: hsa04350; PMID:26893264
ClusterOPCs	ClusterCA2-4_neurons	BMP7	BMPR1B_ACVR2A	0.00182101	0	BMP7_BMPR1B_ACVR2A	BMP7 - (BMPR1B+ACVR2A)	BMP	Secreted Signaling	KEGG: hsa04350; PMID:26893264
ClusterAstrocytes	ClusterEpendymal	BMP7	BMPR1B_ACVR2A	0.00417525	0	BMP7_BMPR1B_ACVR2A	BMP7 - (BMPR1B+ACVR2A)	BMP	Secreted Signaling	KEGG: hsa04350; PMID:26893264
ClusterCA2-4_neurons	ClusterEpendymal	BMP7	BMPR1B_ACVR2A	0.00114939	0	BMP7_BMPR1B_ACVR2A	BMP7 - (BMPR1B+ACVR2A)	BMP	Secreted Signaling	KEGG: hsa04350; PMID:26893264
ClusterEpendymal	ClusterEpendymal	BMP7	BMPR1B_ACVR2A	0.00860827	0	BMP7_BMPR1B_ACVR2A	BMP7 - (BMPR1B+ACVR2A)	BMP	Secreted Signaling	KEGG: hsa04350; PMID:26893264
ClusterNeural Stem	ClusterEpendymal	BMP7	BMPR1B_ACVR2A	0.00358193	0	BMP7_BMPR1B_ACVR2A	BMP7 - (BMPR1B+ACVR2A)	BMP	Secreted Signaling	KEGG: hsa04350; PMID:26893264
ClusterOPCs	ClusterEpendymal	BMP7	BMPR1B_ACVR2A	0.00538601	0	BMP7_BMPR1B_ACVR2A	BMP7 - (BMPR1B+ACVR2A)	BMP	Secreted Signaling	KEGG: hsa04350; PMID:26893264
ClusterAstrocytes	ClusterAstrocytes	BMP7	BMPR1B_BMPR2	0.0123486	0	BMP7_BMPR1B_BMPR2	BMP7 - (BMPR1B+BMPR2)	BMP	Secreted Signaling	KEGG: hsa04350; PMID:26893264
ClusterCA2-4_neurons	ClusterAstrocytes	BMP7	BMPR1B_BMPR2	0.00341953	0	BMP7_BMPR1B_BMPR2	BMP7 - (BMPR1B+BMPR2)	BMP	Secreted Signaling	KEGG: hsa04350; PMID:26893264
ClusterEpendymal	ClusterAstrocytes	BMP7	BMPR1B_BMPR2	0.0252397	0	BMP7_BMPR1B_BMPR2	BMP7 - (BMPR1B+BMPR2)	BMP	Secreted Signaling	KEGG: hsa04350; PMID:26893264
ClusterNeural Stem	ClusterAstrocytes	BMP7	BMPR1B_BMPR2	0.0106062	0	BMP7_BMPR1B_BMPR2	BMP7 - (BMPR1B+BMPR2)	BMP	Secreted Signaling	KEGG: hsa04350; PMID:26893264
ClusterOPCs	ClusterAstrocytes	BMP7	BMPR1B_BMPR2	0.0158917	0	BMP7_BMPR1B_BMPR2	BMP7 - (BMPR1B+BMPR2)	BMP	Secreted Signaling	KEGG: hsa04350; PMID:26893264
ClusterAstrocytes	ClusterCA2-4_neurons	BMP7	BMPR1B_BMPR2	0.00193068	0	BMP7_BMPR1B_BMPR2	BMP7 - (BMPR1B+BMPR2)	BMP	Secreted Signaling	KEGG: hsa04350; PMID:26893264
ClusterCA2-4_neurons	ClusterCA2-4_neurons	BMP7	BMPR1B_BMPR2	0.000530649	0	BMP7_BMPR1B_BMPR2	BMP7 - (BMPR1B+BMPR2)	BMP	Secreted Signaling	KEGG: hsa04350; PMID:26893264
ClusterEpendymal	ClusterCA2-4_neurons	BMP7	BMPR1B_BMPR2	0.00398989	0	BMP7_BMPR1B_BMPR2	BMP7 - (BMPR1B+BMPR2)	BMP	Secreted Signaling	KEGG: hsa04350; PMID:26893264
ClusterNeural Stem	ClusterCA2-4_neurons	BMP7	BMPR1B_BMPR2	0.0016558	0	BMP7_BMPR1B_BMPR2	BMP7 - (BMPR1B+BMPR2)	BMP	Secreted Signaling	KEGG: hsa04350; PMID:26893264
ClusterOPCs	ClusterCA2-4_neurons	BMP7	BMPR1B_BMPR2	0.00249214	0	BMP7_BMPR1B_BMPR2	BMP7 - (BMPR1B+BMPR2)	BMP	Secreted Signaling	KEGG: hsa04350; PMID:26893264
ClusterAstrocytes	ClusterEpendymal	BMP7	BMPR1B_BMPR2	0.00925615	0	BMP7_BMPR1B_BMPR2	BMP7 - (BMPR1B+BMPR2)	BMP	Secreted Signaling	KEGG: hsa04350; PMID:26893264
ClusterCA2-4_neurons	ClusterEpendymal	BMP7	BMPR1B_BMPR2	0.00255744	0	BMP7_BMPR1B_BMPR2	BMP7 - (BMPR1B+BMPR2)	BMP	Secreted Signaling	KEGG: hsa04350; PMID:26893264
ClusterEpendymal	ClusterEpendymal	BMP7	BMPR1B_BMPR2	0.0189809	0	BMP7_BMPR1B_BMPR2	BMP7 - (BMPR1B+BMPR2)	BMP	Secreted Signaling	KEGG: hsa04350; PMID:26893264
ClusterNeural Stem	ClusterEpendymal	BMP7	BMPR1B_BMPR2	0.00794656	0	BMP7_BMPR1B_BMPR2	BMP7 - (BMPR1B+BMPR2)	BMP	Secreted Signaling	KEGG: hsa04350; PMID:26893264
ClusterOPCs	ClusterEpendymal	BMP7	BMPR1B_BMPR2	0.0119226	0	BMP7_BMPR1B_BMPR2	BMP7 - (BMPR1B+BMPR2)	BMP	Secreted Signaling	KEGG: hsa04350; PMID:26893264
ClusterAstrocytes	ClusterNeural Stem	BMP7	BMPR1B_BMPR2	0.0134943	0	BMP7_BMPR1B_BMPR2	BMP7 - (BMPR1B+BMPR2)	BMP	Secreted Signaling	KEGG: hsa04350; PMID:26893264
ClusterCA2-4_neurons	ClusterNeural Stem	BMP7	BMPR1B_BMPR2	0.00373988	0	BMP7_BMPR1B_BMPR2	BMP7 - (BMPR1B+BMPR2)	BMP	Secreted Signaling	KEGG: hsa04350; PMID:26893264
ClusterEpendymal	ClusterNeural Stem	BMP7	BMPR1B_BMPR2	0.0275479	0	BMP7_BMPR1B_BMPR2	BMP7 - (BMPR1B+BMPR2)	BMP	Secreted Signaling	KEGG: hsa04350; PMID:26893264
ClusterNeural Stem	ClusterNeural Stem	BMP7	BMPR1B_BMPR2	0.0115921	0	BMP7_BMPR1B_BMPR2	BMP7 - (BMPR1B+BMPR2)	BMP	Secreted Signaling	KEGG: hsa04350; PMID:26893264
ClusterOPCs	ClusterNeural Stem	BMP7	BMPR1B_BMPR2	0.0173603	0	BMP7_BMPR1B_BMPR2	BMP7 - (BMPR1B+BMPR2)	BMP	Secreted Signaling	KEGG: hsa04350; PMID:26893264
ClusterImmature	ClusterAstrocytes	TGFA	EGFR	0.00482616	0	TGFA_EGFR	TGFA - EGFR	EGF	Secreted Signaling	KEGG: hsa04012
ClusterOPCs	ClusterAstrocytes	TGFA	EGFR	0.00804622	0	TGFA_EGFR	TGFA - EGFR	EGF	Secreted Signaling	KEGG: hsa04012
ClustermGC	ClusterAstrocytes	TGFA	EGFR	0.0115786	0	TGFA_EGFR	TGFA - EGFR	EGF	Secreted Signaling	KEGG: hsa04012
ClusterImmature	ClusterEndothelial	TGFA	EGFR	0.00335327	0	TGFA_EGFR	TGFA - EGFR	EGF	Secreted Signaling	KEGG: hsa04012
ClusterOPCs	ClusterEndothelial	TGFA	EGFR	0.00559613	0	TGFA_EGFR	TGFA - EGFR	EGF	Secreted Signaling	KEGG: hsa04012
ClustermGC	ClusterEndothelial	TGFA	EGFR	0.00806166	0	TGFA_EGFR	TGFA - EGFR	EGF	Secreted Signaling	KEGG: hsa04012
ClusterImmature	ClusterEpendymal	TGFA	EGFR	0.00222622	0	TGFA_EGFR	TGFA - EGFR	EGF	Secreted Signaling	KEGG: hsa04012
ClusterOPCs	ClusterEpendymal	TGFA	EGFR	0.00371805	0	TGFA_EGFR	TGFA - EGFR	EGF	Secreted Signaling	KEGG: hsa04012
ClustermGC	ClusterEpendymal	TGFA	EGFR	0.0053606	0	TGFA_EGFR	TGFA - EGFR	EGF	Secreted Signaling	KEGG: hsa04012
ClusterImmature	ClusterGABA_neurons	TGFA	EGFR	0.00169451	0	TGFA_EGFR	TGFA - EGFR	EGF	Secreted Signaling	KEGG: hsa04012
ClusterOPCs	ClusterGABA_neurons	TGFA	EGFR	0.00283105	0	TGFA_EGFR	TGFA - EGFR	EGF	Secreted Signaling	KEGG: hsa04012
ClustermGC	ClusterGABA_neurons	TGFA	EGFR	0.00408335	0	TGFA_EGFR	TGFA - EGFR	EGF	Secreted Signaling	KEGG: hsa04012
ClusterImmature	ClusterNeural Stem	TGFA	EGFR	0.00172124	0	TGFA_EGFR	TGFA - EGFR	EGF	Secreted Signaling	KEGG: hsa04012
ClusterOPCs	ClusterNeural Stem	TGFA	EGFR	0.00287565	0	TGFA_EGFR	TGFA - EGFR	EGF	Secreted Signaling	KEGG: hsa04012
ClustermGC	ClusterNeural Stem	TGFA	EGFR	0.00414759	0	TGFA_EGFR	TGFA - EGFR	EGF	Secreted Signaling	KEGG: hsa04012
ClusterImmature	ClusterOPCs	TGFA	EGFR	0.00473549	0	TGFA_EGFR	TGFA - EGFR	EGF	Secreted Signaling	KEGG: hsa04012
ClusterOPCs	ClusterOPCs	TGFA	EGFR	0.00789554	0	TGFA_EGFR	TGFA - EGFR	EGF	Secreted Signaling	KEGG: hsa04012
ClustermGC	ClusterOPCs	TGFA	EGFR	0.0113626	0	TGFA_EGFR	TGFA - EGFR	EGF	Secreted Signaling	KEGG: hsa04012
ClusterCA2-4_neurons	ClusterNeuroblast	NRG1	ERBB3	0.0100569	0	NRG1_ERBB3	NRG1 - ERBB3	NRG	Secreted Signaling	KEGG: hsa04012
ClusterCA_neurons	ClusterNeuroblast	NRG1	ERBB3	0.0270851	0	NRG1_ERBB3	NRG1 - ERBB3	NRG	Secreted Signaling	KEGG: hsa04012
ClusterGABA_neurons	ClusterNeuroblast	NRG1	ERBB3	0.0119985	0	NRG1_ERBB3	NRG1 - ERBB3	NRG	Secreted Signaling	KEGG: hsa04012
ClusterImmature	ClusterNeuroblast	NRG1	ERBB3	0.0195444	0	NRG1_ERBB3	NRG1 - ERBB3	NRG	Secreted Signaling	KEGG: hsa04012
ClustermGC	ClusterNeuroblast	NRG1	ERBB3	0.014841	0	NRG1_ERBB3	NRG1 - ERBB3	NRG	Secreted Signaling	KEGG: hsa04012
ClusterCA2-4_neurons	ClusterOPCs	NRG1	ERBB3	0.00362633	0	NRG1_ERBB3	NRG1 - ERBB3	NRG	Secreted Signaling	KEGG: hsa04012
ClusterCA_neurons	ClusterOPCs	NRG1	ERBB3	0.00987501	0	NRG1_ERBB3	NRG1 - ERBB3	NRG	Secreted Signaling	KEGG: hsa04012
ClusterGABA_neurons	ClusterOPCs	NRG1	ERBB3	0.00433188	0	NRG1_ERBB3	NRG1 - ERBB3	NRG	Secreted Signaling	KEGG: hsa04012
ClusterImmature	ClusterOPCs	NRG1	ERBB3	0.00709082	0	NRG1_ERBB3	NRG1 - ERBB3	NRG	Secreted Signaling	KEGG: hsa04012
ClustermGC	ClusterOPCs	NRG1	ERBB3	0.00536798	0	NRG1_ERBB3	NRG1 - ERBB3	NRG	Secreted Signaling	KEGG: hsa04012
ClusterCA2-4_neurons	ClustermOli	NRG1	ERBB3	0.0114325	0	NRG1_ERBB3	NRG1 - ERBB3	NRG	Secreted Signaling	KEGG: hsa04012
ClusterCA_neurons	ClustermOli	NRG1	ERBB3	0.0307177	0	NRG1_ERBB3	NRG1 - ERBB3	NRG	Secreted Signaling	KEGG: hsa04012
ClusterGABA_neurons	ClustermOli	NRG1	ERBB3	0.0136361	0	NRG1_ERBB3	NRG1 - ERBB3	NRG	Secreted Signaling	KEGG: hsa04012
ClusterImmature	ClustermOli	NRG1	ERBB3	0.0221887	0	NRG1_ERBB3	NRG1 - ERBB3	NRG	Secreted Signaling	KEGG: hsa04012
ClustermGC	ClustermOli	NRG1	ERBB3	0.0168599	0	NRG1_ERBB3	NRG1 - ERBB3	NRG	Secreted Signaling	KEGG: hsa04012
ClusterCA2-4_neurons	ClusterAstrocytes	NRG1	ERBB4	0.0997592	0	NRG1_ERBB4	NRG1 - ERBB4	NRG	Secreted Signaling	KEGG: hsa04012
ClusterCA_neurons	ClusterAstrocytes	NRG1	ERBB4	0.232933	0	NRG1_ERBB4	NRG1 - ERBB4	NRG	Secreted Signaling	KEGG: hsa04012
ClusterGABA_neurons	ClusterAstrocytes	NRG1	ERBB4	0.116973	0	NRG1_ERBB4	NRG1 - ERBB4	NRG	Secreted Signaling	KEGG: hsa04012
ClusterImmature	ClusterAstrocytes	NRG1	ERBB4	0.178603	0	NRG1_ERBB4	NRG1 - ERBB4	NRG	Secreted Signaling	KEGG: hsa04012
ClustermGC	ClusterAstrocytes	NRG1	ERBB4	0.141132	0	NRG1_ERBB4	NRG1 - ERBB4	NRG	Secreted Signaling	KEGG: hsa04012
ClusterCA_neurons	ClusterEndothelial	NRG1	ERBB4	0.0321717	0	NRG1_ERBB4	NRG1 - ERBB4	NRG	Secreted Signaling	KEGG: hsa04012
ClusterGABA_neurons	ClusterEndothelial	NRG1	ERBB4	0.0142935	0	NRG1_ERBB4	NRG1 - ERBB4	NRG	Secreted Signaling	KEGG: hsa04012
ClusterImmature	ClusterEndothelial	NRG1	ERBB4	0.0232487	0	NRG1_ERBB4	NRG1 - ERBB4	NRG	Secreted Signaling	KEGG: hsa04012
ClustermGC	ClusterEndothelial	NRG1	ERBB4	0.0176699	0	NRG1_ERBB4	NRG1 - ERBB4	NRG	Secreted Signaling	KEGG: hsa04012
ClusterCA2-4_neurons	ClusterEpendymal	NRG1	ERBB4	0.0740698	0	NRG1_ERBB4	NRG1 - ERBB4	NRG	Secreted Signaling	KEGG: hsa04012
ClusterCA_neurons	ClusterEpendymal	NRG1	ERBB4	0.179798	0	NRG1_ERBB4	NRG1 - ERBB4	NRG	Secreted Signaling	KEGG: hsa04012
ClusterGABA_neurons	ClusterEpendymal	NRG1	ERBB4	0.0872804	0	NRG1_ERBB4	NRG1 - ERBB4	NRG	Secreted Signaling	KEGG: hsa04012
ClusterImmature	ClusterEpendymal	NRG1	ERBB4	0.13567	0	NRG1_ERBB4	NRG1 - ERBB4	NRG	Secreted Signaling	KEGG: hsa04012
ClustermGC	ClusterEpendymal	NRG1	ERBB4	0.106043	0	NRG1_ERBB4	NRG1 - ERBB4	NRG	Secreted Signaling	KEGG: hsa04012
ClusterCA2-4_neurons	ClusterGABA_neurons	NRG1	ERBB4	0.0999717	0	NRG1_ERBB4	NRG1 - ERBB4	NRG	Secreted Signaling	KEGG: hsa04012
ClusterCA_neurons	ClusterGABA_neurons	NRG1	ERBB4	0.233355	0	NRG1_ERBB4	NRG1 - ERBB4	NRG	Secreted Signaling	KEGG: hsa04012
ClusterGABA_neurons	ClusterGABA_neurons	NRG1	ERBB4	0.117217	0	NRG1_ERBB4	NRG1 - ERBB4	NRG	Secreted Signaling	KEGG: hsa04012
ClusterImmature	ClusterGABA_neurons	NRG1	ERBB4	0.17895	0	NRG1_ERBB4	NRG1 - ERBB4	NRG	Secreted Signaling	KEGG: hsa04012
ClustermGC	ClusterGABA_neurons	NRG1	ERBB4	0.141418	0	NRG1_ERBB4	NRG1 - ERBB4	NRG	Secreted Signaling	KEGG: hsa04012
ClusterCA2-4_neurons	ClusterNeural Stem	NRG1	ERBB4	0.0939006	0	NRG1_ERBB4	NRG1 - ERBB4	NRG	Secreted Signaling	KEGG: hsa04012
ClusterCA_neurons	ClusterNeural Stem	NRG1	ERBB4	0.221174	0	NRG1_ERBB4	NRG1 - ERBB4	NRG	Secreted Signaling	KEGG: hsa04012
ClusterGABA_neurons	ClusterNeural Stem	NRG1	ERBB4	0.110227	0	NRG1_ERBB4	NRG1 - ERBB4	NRG	Secreted Signaling	KEGG: hsa04012
ClusterImmature	ClusterNeural Stem	NRG1	ERBB4	0.168983	0	NRG1_ERBB4	NRG1 - ERBB4	NRG	Secreted Signaling	KEGG: hsa04012
ClustermGC	ClusterNeural Stem	NRG1	ERBB4	0.133203	0	NRG1_ERBB4	NRG1 - ERBB4	NRG	Secreted Signaling	KEGG: hsa04012
ClusterCA2-4_neurons	ClusterNeuroblast	NRG1	ERBB4	0.0648344	0	NRG1_ERBB4	NRG1 - ERBB4	NRG	Secreted Signaling	KEGG: hsa04012
ClusterCA_neurons	ClusterNeuroblast	NRG1	ERBB4	0.159653	0	NRG1_ERBB4	NRG1 - ERBB4	NRG	Secreted Signaling	KEGG: hsa04012
ClusterGABA_neurons	ClusterNeuroblast	NRG1	ERBB4	0.076534	0	NRG1_ERBB4	NRG1 - ERBB4	NRG	Secreted Signaling	KEGG: hsa04012
ClusterImmature	ClusterNeuroblast	NRG1	ERBB4	0.119747	0	NRG1_ERBB4	NRG1 - ERBB4	NRG	Secreted Signaling	KEGG: hsa04012
ClustermGC	ClusterNeuroblast	NRG1	ERBB4	0.0932225	0	NRG1_ERBB4	NRG1 - ERBB4	NRG	Secreted Signaling	KEGG: hsa04012
ClusterCA2-4_neurons	ClusterOPCs	NRG1	ERBB4	0.0958361	0	NRG1_ERBB4	NRG1 - ERBB4	NRG	Secreted Signaling	KEGG: hsa04012
ClusterCA_neurons	ClusterOPCs	NRG1	ERBB4	0.225082	0	NRG1_ERBB4	NRG1 - ERBB4	NRG	Secreted Signaling	KEGG: hsa04012
ClusterGABA_neurons	ClusterOPCs	NRG1	ERBB4	0.112457	0	NRG1_ERBB4	NRG1 - ERBB4	NRG	Secreted Signaling	KEGG: hsa04012
ClusterImmature	ClusterOPCs	NRG1	ERBB4	0.172172	0	NRG1_ERBB4	NRG1 - ERBB4	NRG	Secreted Signaling	KEGG: hsa04012
ClustermGC	ClusterOPCs	NRG1	ERBB4	0.135827	0	NRG1_ERBB4	NRG1 - ERBB4	NRG	Secreted Signaling	KEGG: hsa04012
ClusterCA2-4_neurons	ClustermOli	NRG1	ERBB4	0.0790232	0	NRG1_ERBB4	NRG1 - ERBB4	NRG	Secreted Signaling	KEGG: hsa04012
ClusterCA_neurons	ClustermOli	NRG1	ERBB4	0.190369	0	NRG1_ERBB4	NRG1 - ERBB4	NRG	Secreted Signaling	KEGG: hsa04012
ClusterGABA_neurons	ClustermOli	NRG1	ERBB4	0.0930285	0	NRG1_ERBB4	NRG1 - ERBB4	NRG	Secreted Signaling	KEGG: hsa04012
ClusterImmature	ClustermOli	NRG1	ERBB4	0.144102	0	NRG1_ERBB4	NRG1 - ERBB4	NRG	Secreted Signaling	KEGG: hsa04012
ClustermGC	ClustermOli	NRG1	ERBB4	0.112874	0	NRG1_ERBB4	NRG1 - ERBB4	NRG	Secreted Signaling	KEGG: hsa04012
ClusterAstrocytes	ClusterNeuroblast	NRG2	ERBB3	0.00396985	0	NRG2_ERBB3	NRG2 - ERBB3	NRG	Secreted Signaling	KEGG: hsa04012
ClusterCA2-4_neurons	ClusterNeuroblast	NRG2	ERBB3	0.00781367	0	NRG2_ERBB3	NRG2 - ERBB3	NRG	Secreted Signaling	KEGG: hsa04012
ClusterCA_neurons	ClusterNeuroblast	NRG2	ERBB3	0.00804767	0	NRG2_ERBB3	NRG2 - ERBB3	NRG	Secreted Signaling	KEGG: hsa04012
ClusterEpendymal	ClusterNeuroblast	NRG2	ERBB3	0.00510342	0	NRG2_ERBB3	NRG2 - ERBB3	NRG	Secreted Signaling	KEGG: hsa04012
ClusterGABA_neurons	ClusterNeuroblast	NRG2	ERBB3	0.0123044	0	NRG2_ERBB3	NRG2 - ERBB3	NRG	Secreted Signaling	KEGG: hsa04012
ClusterImmature	ClusterNeuroblast	NRG2	ERBB3	0.00999645	0	NRG2_ERBB3	NRG2 - ERBB3	NRG	Secreted Signaling	KEGG: hsa04012
ClusterNeural Stem	ClusterNeuroblast	NRG2	ERBB3	0.00420856	0	NRG2_ERBB3	NRG2 - ERBB3	NRG	Secreted Signaling	KEGG: hsa04012
ClusterOPCs	ClusterNeuroblast	NRG2	ERBB3	0.00475201	0	NRG2_ERBB3	NRG2 - ERBB3	NRG	Secreted Signaling	KEGG: hsa04012
ClustermGC	ClusterNeuroblast	NRG2	ERBB3	0.0111929	0	NRG2_ERBB3	NRG2 - ERBB3	NRG	Secreted Signaling	KEGG: hsa04012
ClusterAstrocytes	ClusterOPCs	NRG2	ERBB3	0.00142585	0	NRG2_ERBB3	NRG2 - ERBB3	NRG	Secreted Signaling	KEGG: hsa04012
ClusterCA2-4_neurons	ClusterOPCs	NRG2	ERBB3	0.00281339	0	NRG2_ERBB3	NRG2 - ERBB3	NRG	Secreted Signaling	KEGG: hsa04012
ClusterCA_neurons	ClusterOPCs	NRG2	ERBB3	0.00289809	0	NRG2_ERBB3	NRG2 - ERBB3	NRG	Secreted Signaling	KEGG: hsa04012
ClusterEpendymal	ClusterOPCs	NRG2	ERBB3	0.00183433	0	NRG2_ERBB3	NRG2 - ERBB3	NRG	Secreted Signaling	KEGG: hsa04012
ClusterGABA_neurons	ClusterOPCs	NRG2	ERBB3	0.00444319	0	NRG2_ERBB3	NRG2 - ERBB3	NRG	Secreted Signaling	KEGG: hsa04012
ClusterImmature	ClusterOPCs	NRG2	ERBB3	0.0036044	0	NRG2_ERBB3	NRG2 - ERBB3	NRG	Secreted Signaling	KEGG: hsa04012
ClusterNeural Stem	ClusterOPCs	NRG2	ERBB3	0.00151182	0	NRG2_ERBB3	NRG2 - ERBB3	NRG	Secreted Signaling	KEGG: hsa04012
ClusterOPCs	ClusterOPCs	NRG2	ERBB3	0.00170764	0	NRG2_ERBB3	NRG2 - ERBB3	NRG	Secreted Signaling	KEGG: hsa04012
ClustermGC	ClusterOPCs	NRG2	ERBB3	0.00403891	0	NRG2_ERBB3	NRG2 - ERBB3	NRG	Secreted Signaling	KEGG: hsa04012
ClusterAstrocytes	ClustermOli	NRG2	ERBB3	0.00451667	0	NRG2_ERBB3	NRG2 - ERBB3	NRG	Secreted Signaling	KEGG: hsa04012
ClusterCA2-4_neurons	ClustermOli	NRG2	ERBB3	0.00888523	0	NRG2_ERBB3	NRG2 - ERBB3	NRG	Secreted Signaling	KEGG: hsa04012
ClusterCA_neurons	ClustermOli	NRG2	ERBB3	0.00915103	0	NRG2_ERBB3	NRG2 - ERBB3	NRG	Secreted Signaling	KEGG: hsa04012
ClusterEpendymal	ClustermOli	NRG2	ERBB3	0.00580547	0	NRG2_ERBB3	NRG2 - ERBB3	NRG	Secreted Signaling	KEGG: hsa04012
ClusterGABA_neurons	ClustermOli	NRG2	ERBB3	0.0139831	0	NRG2_ERBB3	NRG2 - ERBB3	NRG	Secreted Signaling	KEGG: hsa04012
ClusterImmature	ClustermOli	NRG2	ERBB3	0.0113639	0	NRG2_ERBB3	NRG2 - ERBB3	NRG	Secreted Signaling	KEGG: hsa04012
ClusterNeural Stem	ClustermOli	NRG2	ERBB3	0.0047881	0	NRG2_ERBB3	NRG2 - ERBB3	NRG	Secreted Signaling	KEGG: hsa04012
ClusterOPCs	ClustermOli	NRG2	ERBB3	0.00540599	0	NRG2_ERBB3	NRG2 - ERBB3	NRG	Secreted Signaling	KEGG: hsa04012
ClustermGC	ClustermOli	NRG2	ERBB3	0.0127219	0	NRG2_ERBB3	NRG2 - ERBB3	NRG	Secreted Signaling	KEGG: hsa04012
ClusterAstrocytes	ClusterAstrocytes	NRG2	ERBB4	0.041664	0	NRG2_ERBB4	NRG2 - ERBB4	NRG	Secreted Signaling	KEGG: hsa04012
ClusterCA2-4_neurons	ClusterAstrocytes	NRG2	ERBB4	0.0791066	0	NRG2_ERBB4	NRG2 - ERBB4	NRG	Secreted Signaling	KEGG: hsa04012
ClusterCA_neurons	ClusterAstrocytes	NRG2	ERBB4	0.0813007	0	NRG2_ERBB4	NRG2 - ERBB4	NRG	Secreted Signaling	KEGG: hsa04012
ClusterEpendymal	ClusterAstrocytes	NRG2	ERBB4	0.0529883	0	NRG2_ERBB4	NRG2 - ERBB4	NRG	Secreted Signaling	KEGG: hsa04012
ClusterGABA_neurons	ClusterAstrocytes	NRG2	ERBB4	0.119631	0	NRG2_ERBB4	NRG2 - ERBB4	NRG	Secreted Signaling	KEGG: hsa04012
ClusterImmature	ClusterAstrocytes	NRG2	ERBB4	0.0992139	0	NRG2_ERBB4	NRG2 - ERBB4	NRG	Secreted Signaling	KEGG: hsa04012
ClusterNeural Stem	ClusterAstrocytes	NRG2	ERBB4	0.044069	0	NRG2_ERBB4	NRG2 - ERBB4	NRG	Secreted Signaling	KEGG: hsa04012
ClusterOPCs	ClusterAstrocytes	NRG2	ERBB4	0.0495038	0	NRG2_ERBB4	NRG2 - ERBB4	NRG	Secreted Signaling	KEGG: hsa04012
ClustermGC	ClusterAstrocytes	NRG2	ERBB4	0.109903	0	NRG2_ERBB4	NRG2 - ERBB4	NRG	Secreted Signaling	KEGG: hsa04012
ClusterAstrocytes	ClusterEpendymal	NRG2	ERBB4	0.0304292	0	NRG2_ERBB4	NRG2 - ERBB4	NRG	Secreted Signaling	KEGG: hsa04012
ClusterCA2-4_neurons	ClusterEpendymal	NRG2	ERBB4	0.0583906	0	NRG2_ERBB4	NRG2 - ERBB4	NRG	Secreted Signaling	KEGG: hsa04012
ClusterCA_neurons	ClusterEpendymal	NRG2	ERBB4	0.0600476	0	NRG2_ERBB4	NRG2 - ERBB4	NRG	Secreted Signaling	KEGG: hsa04012
ClusterEpendymal	ClusterEpendymal	NRG2	ERBB4	0.0388237	0	NRG2_ERBB4	NRG2 - ERBB4	NRG	Secreted Signaling	KEGG: hsa04012
ClusterGABA_neurons	ClusterEpendymal	NRG2	ERBB4	0.089332	0	NRG2_ERBB4	NRG2 - ERBB4	NRG	Secreted Signaling	KEGG: hsa04012
ClusterImmature	ClusterEpendymal	NRG2	ERBB4	0.0736534	0	NRG2_ERBB4	NRG2 - ERBB4	NRG	Secreted Signaling	KEGG: hsa04012
ClusterNeural Stem	ClusterEpendymal	NRG2	ERBB4	0.0322075	0	NRG2_ERBB4	NRG2 - ERBB4	NRG	Secreted Signaling	KEGG: hsa04012
ClusterOPCs	ClusterEpendymal	NRG2	ERBB4	0.036235	0	NRG2_ERBB4	NRG2 - ERBB4	NRG	Secreted Signaling	KEGG: hsa04012
ClustermGC	ClusterEpendymal	NRG2	ERBB4	0.0818387	0	NRG2_ERBB4	NRG2 - ERBB4	NRG	Secreted Signaling	KEGG: hsa04012
ClusterAstrocytes	ClusterGABA_neurons	NRG2	ERBB4	0.0417585	0	NRG2_ERBB4	NRG2 - ERBB4	NRG	Secreted Signaling	KEGG: hsa04012
ClusterCA2-4_neurons	ClusterGABA_neurons	NRG2	ERBB4	0.079279	0	NRG2_ERBB4	NRG2 - ERBB4	NRG	Secreted Signaling	KEGG: hsa04012
ClusterCA_neurons	ClusterGABA_neurons	NRG2	ERBB4	0.0814775	0	NRG2_ERBB4	NRG2 - ERBB4	NRG	Secreted Signaling	KEGG: hsa04012
ClusterEpendymal	ClusterGABA_neurons	NRG2	ERBB4	0.0531071	0	NRG2_ERBB4	NRG2 - ERBB4	NRG	Secreted Signaling	KEGG: hsa04012
ClusterGABA_neurons	ClusterGABA_neurons	NRG2	ERBB4	0.11988	0	NRG2_ERBB4	NRG2 - ERBB4	NRG	Secreted Signaling	KEGG: hsa04012
ClusterImmature	ClusterGABA_neurons	NRG2	ERBB4	0.0994254	0	NRG2_ERBB4	NRG2 - ERBB4	NRG	Secreted Signaling	KEGG: hsa04012
ClusterNeural Stem	ClusterGABA_neurons	NRG2	ERBB4	0.0441687	0	NRG2_ERBB4	NRG2 - ERBB4	NRG	Secreted Signaling	KEGG: hsa04012
ClusterOPCs	ClusterGABA_neurons	NRG2	ERBB4	0.0496151	0	NRG2_ERBB4	NRG2 - ERBB4	NRG	Secreted Signaling	KEGG: hsa04012
ClustermGC	ClusterGABA_neurons	NRG2	ERBB4	0.110134	0	NRG2_ERBB4	NRG2 - ERBB4	NRG	Secreted Signaling	KEGG: hsa04012
ClusterAstrocytes	ClusterNeural Stem	NRG2	ERBB4	0.0390691	0	NRG2_ERBB4	NRG2 - ERBB4	NRG	Secreted Signaling	KEGG: hsa04012
ClusterCA2-4_neurons	ClusterNeural Stem	NRG2	ERBB4	0.0743606	0	NRG2_ERBB4	NRG2 - ERBB4	NRG	Secreted Signaling	KEGG: hsa04012
ClusterCA_neurons	ClusterNeural Stem	NRG2	ERBB4	0.0764341	0	NRG2_ERBB4	NRG2 - ERBB4	NRG	Secreted Signaling	KEGG: hsa04012
ClusterEpendymal	ClusterNeural Stem	NRG2	ERBB4	0.0497247	0	NRG2_ERBB4	NRG2 - ERBB4	NRG	Secreted Signaling	KEGG: hsa04012
ClusterGABA_neurons	ClusterNeural Stem	NRG2	ERBB4	0.112751	0	NRG2_ERBB4	NRG2 - ERBB4	NRG	Secreted Signaling	KEGG: hsa04012
ClusterImmature	ClusterNeural Stem	NRG2	ERBB4	0.093384	0	NRG2_ERBB4	NRG2 - ERBB4	NRG	Secreted Signaling	KEGG: hsa04012
ClusterNeural Stem	ClusterNeural Stem	NRG2	ERBB4	0.0413308	0	NRG2_ERBB4	NRG2 - ERBB4	NRG	Secreted Signaling	KEGG: hsa04012
ClusterOPCs	ClusterNeural Stem	NRG2	ERBB4	0.0464443	0	NRG2_ERBB4	NRG2 - ERBB4	NRG	Secreted Signaling	KEGG: hsa04012
ClustermGC	ClusterNeural Stem	NRG2	ERBB4	0.103517	0	NRG2_ERBB4	NRG2 - ERBB4	NRG	Secreted Signaling	KEGG: hsa04012
ClusterAstrocytes	ClusterNeuroblast	NRG2	ERBB4	0.0264796	0	NRG2_ERBB4	NRG2 - ERBB4	NRG	Secreted Signaling	KEGG: hsa04012
ClusterCA2-4_neurons	ClusterNeuroblast	NRG2	ERBB4	0.0510024	0	NRG2_ERBB4	NRG2 - ERBB4	NRG	Secreted Signaling	KEGG: hsa04012
ClusterCA_neurons	ClusterNeuroblast	NRG2	ERBB4	0.0524615	0	NRG2_ERBB4	NRG2 - ERBB4	NRG	Secreted Signaling	KEGG: hsa04012
ClusterEpendymal	ClusterNeuroblast	NRG2	ERBB4	0.0338224	0	NRG2_ERBB4	NRG2 - ERBB4	NRG	Secreted Signaling	KEGG: hsa04012
ClusterGABA_neurons	ClusterNeuroblast	NRG2	ERBB4	0.0783547	0	NRG2_ERBB4	NRG2 - ERBB4	NRG	Secreted Signaling	KEGG: hsa04012
ClusterImmature	ClusterNeuroblast	NRG2	ERBB4	0.0644663	0	NRG2_ERBB4	NRG2 - ERBB4	NRG	Secreted Signaling	KEGG: hsa04012
ClusterNeural Stem	ClusterNeuroblast	NRG2	ERBB4	0.0280337	0	NRG2_ERBB4	NRG2 - ERBB4	NRG	Secreted Signaling	KEGG: hsa04012
ClusterOPCs	ClusterNeuroblast	NRG2	ERBB4	0.0315562	0	NRG2_ERBB4	NRG2 - ERBB4	NRG	Secreted Signaling	KEGG: hsa04012
ClustermGC	ClusterNeuroblast	NRG2	ERBB4	0.0717096	0	NRG2_ERBB4	NRG2 - ERBB4	NRG	Secreted Signaling	KEGG: hsa04012
ClusterAstrocytes	ClusterOPCs	NRG2	ERBB4	0.0399242	0	NRG2_ERBB4	NRG2 - ERBB4	NRG	Secreted Signaling	KEGG: hsa04012
ClusterCA2-4_neurons	ClusterOPCs	NRG2	ERBB4	0.0759272	0	NRG2_ERBB4	NRG2 - ERBB4	NRG	Secreted Signaling	KEGG: hsa04012
ClusterCA_neurons	ClusterOPCs	NRG2	ERBB4	0.0780406	0	NRG2_ERBB4	NRG2 - ERBB4	NRG	Secreted Signaling	KEGG: hsa04012
ClusterEpendymal	ClusterOPCs	NRG2	ERBB4	0.0508007	0	NRG2_ERBB4	NRG2 - ERBB4	NRG	Secreted Signaling	KEGG: hsa04012
ClusterGABA_neurons	ClusterOPCs	NRG2	ERBB4	0.115026	0	NRG2_ERBB4	NRG2 - ERBB4	NRG	Secreted Signaling	KEGG: hsa04012
ClusterImmature	ClusterOPCs	NRG2	ERBB4	0.09531	0	NRG2_ERBB4	NRG2 - ERBB4	NRG	Secreted Signaling	KEGG: hsa04012
ClusterNeural Stem	ClusterOPCs	NRG2	ERBB4	0.0422332	0	NRG2_ERBB4	NRG2 - ERBB4	NRG	Secreted Signaling	KEGG: hsa04012
ClusterOPCs	ClusterOPCs	NRG2	ERBB4	0.0474528	0	NRG2_ERBB4	NRG2 - ERBB4	NRG	Secreted Signaling	KEGG: hsa04012
ClustermGC	ClusterOPCs	NRG2	ERBB4	0.105628	0	NRG2_ERBB4	NRG2 - ERBB4	NRG	Secreted Signaling	KEGG: hsa04012
ClusterAstrocytes	ClustermOli	NRG2	ERBB4	0.0325668	0	NRG2_ERBB4	NRG2 - ERBB4	NRG	Secreted Signaling	KEGG: hsa04012
ClusterCA2-4_neurons	ClustermOli	NRG2	ERBB4	0.062366	0	NRG2_ERBB4	NRG2 - ERBB4	NRG	Secreted Signaling	KEGG: hsa04012
ClusterCA_neurons	ClustermOli	NRG2	ERBB4	0.0641282	0	NRG2_ERBB4	NRG2 - ERBB4	NRG	Secreted Signaling	KEGG: hsa04012
ClusterEpendymal	ClustermOli	NRG2	ERBB4	0.0415257	0	NRG2_ERBB4	NRG2 - ERBB4	NRG	Secreted Signaling	KEGG: hsa04012
ClusterGABA_neurons	ClustermOli	NRG2	ERBB4	0.0952011	0	NRG2_ERBB4	NRG2 - ERBB4	NRG	Secreted Signaling	KEGG: hsa04012
ClusterImmature	ClustermOli	NRG2	ERBB4	0.0785813	0	NRG2_ERBB4	NRG2 - ERBB4	NRG	Secreted Signaling	KEGG: hsa04012
ClusterNeural Stem	ClustermOli	NRG2	ERBB4	0.0344656	0	NRG2_ERBB4	NRG2 - ERBB4	NRG	Secreted Signaling	KEGG: hsa04012
ClusterOPCs	ClustermOli	NRG2	ERBB4	0.0387641	0	NRG2_ERBB4	NRG2 - ERBB4	NRG	Secreted Signaling	KEGG: hsa04012
ClustermGC	ClustermOli	NRG2	ERBB4	0.0872627	0	NRG2_ERBB4	NRG2 - ERBB4	NRG	Secreted Signaling	KEGG: hsa04012
ClusterAstrocytes	ClusterAstrocytes	NRG3	ERBB4	0.383062	0	NRG3_ERBB4	NRG3 - ERBB4	NRG	Secreted Signaling	KEGG: hsa04012
ClusterCA2-4_neurons	ClusterAstrocytes	NRG3	ERBB4	0.389714	0	NRG3_ERBB4	NRG3 - ERBB4	NRG	Secreted Signaling	KEGG: hsa04012
ClusterCA_neurons	ClusterAstrocytes	NRG3	ERBB4	0.367216	0	NRG3_ERBB4	NRG3 - ERBB4	NRG	Secreted Signaling	KEGG: hsa04012
ClusterEpendymal	ClusterAstrocytes	NRG3	ERBB4	0.326461	0	NRG3_ERBB4	NRG3 - ERBB4	NRG	Secreted Signaling	KEGG: hsa04012
ClusterGABA_neurons	ClusterAstrocytes	NRG3	ERBB4	0.366788	0	NRG3_ERBB4	NRG3 - ERBB4	NRG	Secreted Signaling	KEGG: hsa04012
ClusterImmature	ClusterAstrocytes	NRG3	ERBB4	0.37211	0	NRG3_ERBB4	NRG3 - ERBB4	NRG	Secreted Signaling	KEGG: hsa04012
ClusterNeural Stem	ClusterAstrocytes	NRG3	ERBB4	0.377783	0	NRG3_ERBB4	NRG3 - ERBB4	NRG	Secreted Signaling	KEGG: hsa04012
ClusterOPCs	ClusterAstrocytes	NRG3	ERBB4	0.291168	0	NRG3_ERBB4	NRG3 - ERBB4	NRG	Secreted Signaling	KEGG: hsa04012
ClustermGC	ClusterAstrocytes	NRG3	ERBB4	0.379589	0	NRG3_ERBB4	NRG3 - ERBB4	NRG	Secreted Signaling	KEGG: hsa04012
ClusterAstrocytes	ClusterEpendymal	NRG3	ERBB4	0.3095	0	NRG3_ERBB4	NRG3 - ERBB4	NRG	Secreted Signaling	KEGG: hsa04012
ClusterCA2-4_neurons	ClusterEpendymal	NRG3	ERBB4	0.315528	0	NRG3_ERBB4	NRG3 - ERBB4	NRG	Secreted Signaling	KEGG: hsa04012
ClusterCA_neurons	ClusterEpendymal	NRG3	ERBB4	0.295241	0	NRG3_ERBB4	NRG3 - ERBB4	NRG	Secreted Signaling	KEGG: hsa04012
ClusterEpendymal	ClusterEpendymal	NRG3	ERBB4	0.259202	0	NRG3_ERBB4	NRG3 - ERBB4	NRG	Secreted Signaling	KEGG: hsa04012
ClusterGABA_neurons	ClusterEpendymal	NRG3	ERBB4	0.294858	0	NRG3_ERBB4	NRG3 - ERBB4	NRG	Secreted Signaling	KEGG: hsa04012
ClusterImmature	ClusterEpendymal	NRG3	ERBB4	0.29963	0	NRG3_ERBB4	NRG3 - ERBB4	NRG	Secreted Signaling	KEGG: hsa04012
ClusterNeural Stem	ClusterEpendymal	NRG3	ERBB4	0.304734	0	NRG3_ERBB4	NRG3 - ERBB4	NRG	Secreted Signaling	KEGG: hsa04012
ClusterOPCs	ClusterEpendymal	NRG3	ERBB4	0.228711	0	NRG3_ERBB4	NRG3 - ERBB4	NRG	Secreted Signaling	KEGG: hsa04012
ClustermGC	ClusterEpendymal	NRG3	ERBB4	0.306362	0	NRG3_ERBB4	NRG3 - ERBB4	NRG	Secreted Signaling	KEGG: hsa04012
ClusterAstrocytes	ClusterGABA_neurons	NRG3	ERBB4	0.383621	0	NRG3_ERBB4	NRG3 - ERBB4	NRG	Secreted Signaling	KEGG: hsa04012
ClusterCA2-4_neurons	ClusterGABA_neurons	NRG3	ERBB4	0.390277	0	NRG3_ERBB4	NRG3 - ERBB4	NRG	Secreted Signaling	KEGG: hsa04012
ClusterCA_neurons	ClusterGABA_neurons	NRG3	ERBB4	0.367766	0	NRG3_ERBB4	NRG3 - ERBB4	NRG	Secreted Signaling	KEGG: hsa04012
ClusterEpendymal	ClusterGABA_neurons	NRG3	ERBB4	0.326981	0	NRG3_ERBB4	NRG3 - ERBB4	NRG	Secreted Signaling	KEGG: hsa04012
ClusterGABA_neurons	ClusterGABA_neurons	NRG3	ERBB4	0.367338	0	NRG3_ERBB4	NRG3 - ERBB4	NRG	Secreted Signaling	KEGG: hsa04012
ClusterImmature	ClusterGABA_neurons	NRG3	ERBB4	0.372663	0	NRG3_ERBB4	NRG3 - ERBB4	NRG	Secreted Signaling	KEGG: hsa04012
ClusterNeural Stem	ClusterGABA_neurons	NRG3	ERBB4	0.378339	0	NRG3_ERBB4	NRG3 - ERBB4	NRG	Secreted Signaling	KEGG: hsa04012
ClusterOPCs	ClusterGABA_neurons	NRG3	ERBB4	0.291656	0	NRG3_ERBB4	NRG3 - ERBB4	NRG	Secreted Signaling	KEGG: hsa04012
ClustermGC	ClusterGABA_neurons	NRG3	ERBB4	0.380146	0	NRG3_ERBB4	NRG3 - ERBB4	NRG	Secreted Signaling	KEGG: hsa04012
ClusterAstrocytes	ClusterNeural Stem	NRG3	ERBB4	0.367355	0	NRG3_ERBB4	NRG3 - ERBB4	NRG	Secreted Signaling	KEGG: hsa04012
ClusterCA2-4_neurons	ClusterNeural Stem	NRG3	ERBB4	0.3739	0	NRG3_ERBB4	NRG3 - ERBB4	NRG	Secreted Signaling	KEGG: hsa04012
ClusterCA_neurons	ClusterNeural Stem	NRG3	ERBB4	0.351788	0	NRG3_ERBB4	NRG3 - ERBB4	NRG	Secreted Signaling	KEGG: hsa04012
ClusterEpendymal	ClusterNeural Stem	NRG3	ERBB4	0.311902	0	NRG3_ERBB4	NRG3 - ERBB4	NRG	Secreted Signaling	KEGG: hsa04012
ClusterGABA_neurons	ClusterNeural Stem	NRG3	ERBB4	0.351368	0	NRG3_ERBB4	NRG3 - ERBB4	NRG	Secreted Signaling	KEGG: hsa04012
ClusterImmature	ClusterNeural Stem	NRG3	ERBB4	0.356593	0	NRG3_ERBB4	NRG3 - ERBB4	NRG	Secreted Signaling	KEGG: hsa04012
ClusterNeural Stem	ClusterNeural Stem	NRG3	ERBB4	0.362166	0	NRG3_ERBB4	NRG3 - ERBB4	NRG	Secreted Signaling	KEGG: hsa04012
ClusterOPCs	ClusterNeural Stem	NRG3	ERBB4	0.277534	0	NRG3_ERBB4	NRG3 - ERBB4	NRG	Secreted Signaling	KEGG: hsa04012
ClustermGC	ClusterNeural Stem	NRG3	ERBB4	0.36394	0	NRG3_ERBB4	NRG3 - ERBB4	NRG	Secreted Signaling	KEGG: hsa04012
ClusterAstrocytes	ClusterNeuroblast	NRG3	ERBB4	0.279779	0	NRG3_ERBB4	NRG3 - ERBB4	NRG	Secreted Signaling	KEGG: hsa04012
ClusterCA2-4_neurons	ClusterNeuroblast	NRG3	ERBB4	0.285468	0	NRG3_ERBB4	NRG3 - ERBB4	NRG	Secreted Signaling	KEGG: hsa04012
ClusterCA_neurons	ClusterNeuroblast	NRG3	ERBB4	0.266361	0	NRG3_ERBB4	NRG3 - ERBB4	NRG	Secreted Signaling	KEGG: hsa04012
ClusterEpendymal	ClusterNeuroblast	NRG3	ERBB4	0.232684	0	NRG3_ERBB4	NRG3 - ERBB4	NRG	Secreted Signaling	KEGG: hsa04012
ClusterGABA_neurons	ClusterNeuroblast	NRG3	ERBB4	0.266002	0	NRG3_ERBB4	NRG3 - ERBB4	NRG	Secreted Signaling	KEGG: hsa04012
ClusterImmature	ClusterNeuroblast	NRG3	ERBB4	0.270486	0	NRG3_ERBB4	NRG3 - ERBB4	NRG	Secreted Signaling	KEGG: hsa04012
ClusterNeural Stem	ClusterNeuroblast	NRG3	ERBB4	0.275289	0	NRG3_ERBB4	NRG3 - ERBB4	NRG	Secreted Signaling	KEGG: hsa04012
ClusterOPCs	ClusterNeuroblast	NRG3	ERBB4	0.204452	0	NRG3_ERBB4	NRG3 - ERBB4	NRG	Secreted Signaling	KEGG: hsa04012
ClustermGC	ClusterNeuroblast	NRG3	ERBB4	0.276823	0	NRG3_ERBB4	NRG3 - ERBB4	NRG	Secreted Signaling	KEGG: hsa04012
ClusterAstrocytes	ClusterOPCs	NRG3	ERBB4	0.372609	0	NRG3_ERBB4	NRG3 - ERBB4	NRG	Secreted Signaling	KEGG: hsa04012
ClusterCA2-4_neurons	ClusterOPCs	NRG3	ERBB4	0.379191	0	NRG3_ERBB4	NRG3 - ERBB4	NRG	Secreted Signaling	KEGG: hsa04012
ClusterCA_neurons	ClusterOPCs	NRG3	ERBB4	0.356946	0	NRG3_ERBB4	NRG3 - ERBB4	NRG	Secreted Signaling	KEGG: hsa04012
ClusterEpendymal	ClusterOPCs	NRG3	ERBB4	0.31676	0	NRG3_ERBB4	NRG3 - ERBB4	NRG	Secreted Signaling	KEGG: hsa04012
ClusterGABA_neurons	ClusterOPCs	NRG3	ERBB4	0.356523	0	NRG3_ERBB4	NRG3 - ERBB4	NRG	Secreted Signaling	KEGG: hsa04012
ClusterImmature	ClusterOPCs	NRG3	ERBB4	0.361781	0	NRG3_ERBB4	NRG3 - ERBB4	NRG	Secreted Signaling	KEGG: hsa04012
ClusterNeural Stem	ClusterOPCs	NRG3	ERBB4	0.367389	0	NRG3_ERBB4	NRG3 - ERBB4	NRG	Secreted Signaling	KEGG: hsa04012
ClusterOPCs	ClusterOPCs	NRG3	ERBB4	0.282077	0	NRG3_ERBB4	NRG3 - ERBB4	NRG	Secreted Signaling	KEGG: hsa04012
ClustermGC	ClusterOPCs	NRG3	ERBB4	0.369174	0	NRG3_ERBB4	NRG3 - ERBB4	NRG	Secreted Signaling	KEGG: hsa04012
ClusterAstrocytes	ClustermOli	NRG3	ERBB4	0.324677	0	NRG3_ERBB4	NRG3 - ERBB4	NRG	Secreted Signaling	KEGG: hsa04012
ClusterCA2-4_neurons	ClustermOli	NRG3	ERBB4	0.330859	0	NRG3_ERBB4	NRG3 - ERBB4	NRG	Secreted Signaling	KEGG: hsa04012
ClusterCA_neurons	ClustermOli	NRG3	ERBB4	0.310032	0	NRG3_ERBB4	NRG3 - ERBB4	NRG	Secreted Signaling	KEGG: hsa04012
ClusterEpendymal	ClustermOli	NRG3	ERBB4	0.272887	0	NRG3_ERBB4	NRG3 - ERBB4	NRG	Secreted Signaling	KEGG: hsa04012
ClusterGABA_neurons	ClustermOli	NRG3	ERBB4	0.309638	0	NRG3_ERBB4	NRG3 - ERBB4	NRG	Secreted Signaling	KEGG: hsa04012
ClusterImmature	ClustermOli	NRG3	ERBB4	0.314543	0	NRG3_ERBB4	NRG3 - ERBB4	NRG	Secreted Signaling	KEGG: hsa04012
ClusterNeural Stem	ClustermOli	NRG3	ERBB4	0.319786	0	NRG3_ERBB4	NRG3 - ERBB4	NRG	Secreted Signaling	KEGG: hsa04012
ClusterOPCs	ClustermOli	NRG3	ERBB4	0.241311	0	NRG3_ERBB4	NRG3 - ERBB4	NRG	Secreted Signaling	KEGG: hsa04012
ClustermGC	ClustermOli	NRG3	ERBB4	0.321457	0	NRG3_ERBB4	NRG3 - ERBB4	NRG	Secreted Signaling	KEGG: hsa04012
ClusterEpendymal	ClusterAstrocytes	NRG4	ERBB4	0.0377335	0	NRG4_ERBB4	NRG4 - ERBB4	NRG	Secreted Signaling	KEGG: hsa04012
ClusterImmature	ClusterAstrocytes	NRG4	ERBB4	0.0127449	0	NRG4_ERBB4	NRG4 - ERBB4	NRG	Secreted Signaling	KEGG: hsa04012
ClustermGC	ClusterAstrocytes	NRG4	ERBB4	0.0165572	0	NRG4_ERBB4	NRG4 - ERBB4	NRG	Secreted Signaling	KEGG: hsa04012
ClusterEpendymal	ClusterCA_neurons	NRG4	ERBB4	0.000966576	0	NRG4_ERBB4	NRG4 - ERBB4	NRG	Secreted Signaling	KEGG: hsa04012
ClusterImmature	ClusterCA_neurons	NRG4	ERBB4	0.000318414	0	NRG4_ERBB4	NRG4 - ERBB4	NRG	Secreted Signaling	KEGG: hsa04012
ClustermGC	ClusterCA_neurons	NRG4	ERBB4	0.000415224	0	NRG4_ERBB4	NRG4 - ERBB4	NRG	Secreted Signaling	KEGG: hsa04012
ClusterEpendymal	ClusterEndothelial	NRG4	ERBB4	0.00427416	0	NRG4_ERBB4	NRG4 - ERBB4	NRG	Secreted Signaling	KEGG: hsa04012
ClusterImmature	ClusterEndothelial	NRG4	ERBB4	0.00141115	0	NRG4_ERBB4	NRG4 - ERBB4	NRG	Secreted Signaling	KEGG: hsa04012
ClustermGC	ClusterEndothelial	NRG4	ERBB4	0.00183958	0	NRG4_ERBB4	NRG4 - ERBB4	NRG	Secreted Signaling	KEGG: hsa04012
ClusterEpendymal	ClusterEpendymal	NRG4	ERBB4	0.0275282	0	NRG4_ERBB4	NRG4 - ERBB4	NRG	Secreted Signaling	KEGG: hsa04012
ClusterImmature	ClusterEpendymal	NRG4	ERBB4	0.00923308	0	NRG4_ERBB4	NRG4 - ERBB4	NRG	Secreted Signaling	KEGG: hsa04012
ClustermGC	ClusterEpendymal	NRG4	ERBB4	0.0120077	0	NRG4_ERBB4	NRG4 - ERBB4	NRG	Secreted Signaling	KEGG: hsa04012
ClusterEpendymal	ClusterGABA_neurons	NRG4	ERBB4	0.0378194	0	NRG4_ERBB4	NRG4 - ERBB4	NRG	Secreted Signaling	KEGG: hsa04012
ClusterImmature	ClusterGABA_neurons	NRG4	ERBB4	0.0127747	0	NRG4_ERBB4	NRG4 - ERBB4	NRG	Secreted Signaling	KEGG: hsa04012
ClustermGC	ClusterGABA_neurons	NRG4	ERBB4	0.0165958	0	NRG4_ERBB4	NRG4 - ERBB4	NRG	Secreted Signaling	KEGG: hsa04012
ClusterEpendymal	ClusterNeural Stem	NRG4	ERBB4	0.0353744	0	NRG4_ERBB4	NRG4 - ERBB4	NRG	Secreted Signaling	KEGG: hsa04012
ClusterImmature	ClusterNeural Stem	NRG4	ERBB4	0.0119287	0	NRG4_ERBB4	NRG4 - ERBB4	NRG	Secreted Signaling	KEGG: hsa04012
ClustermGC	ClusterNeural Stem	NRG4	ERBB4	0.0155007	0	NRG4_ERBB4	NRG4 - ERBB4	NRG	Secreted Signaling	KEGG: hsa04012
ClusterEpendymal	ClusterNeuroblast	NRG4	ERBB4	0.0239457	0	NRG4_ERBB4	NRG4 - ERBB4	NRG	Secreted Signaling	KEGG: hsa04012
ClusterImmature	ClusterNeuroblast	NRG4	ERBB4	0.0080119	0	NRG4_ERBB4	NRG4 - ERBB4	NRG	Secreted Signaling	KEGG: hsa04012
ClustermGC	ClusterNeuroblast	NRG4	ERBB4	0.0104234	0	NRG4_ERBB4	NRG4 - ERBB4	NRG	Secreted Signaling	KEGG: hsa04012
ClusterEpendymal	ClusterOPCs	NRG4	ERBB4	0.0361517	0	NRG4_ERBB4	NRG4 - ERBB4	NRG	Secreted Signaling	KEGG: hsa04012
ClusterImmature	ClusterOPCs	NRG4	ERBB4	0.0121973	0	NRG4_ERBB4	NRG4 - ERBB4	NRG	Secreted Signaling	KEGG: hsa04012
ClustermGC	ClusterOPCs	NRG4	ERBB4	0.0158485	0	NRG4_ERBB4	NRG4 - ERBB4	NRG	Secreted Signaling	KEGG: hsa04012
ClusterEpendymal	ClustermGC	NRG4	ERBB4	0.00118032	0	NRG4_ERBB4	NRG4 - ERBB4	NRG	Secreted Signaling	KEGG: hsa04012
ClusterImmature	ClustermGC	NRG4	ERBB4	0.000388882	0	NRG4_ERBB4	NRG4 - ERBB4	NRG	Secreted Signaling	KEGG: hsa04012
ClustermGC	ClustermGC	NRG4	ERBB4	0.000507107	0	NRG4_ERBB4	NRG4 - ERBB4	NRG	Secreted Signaling	KEGG: hsa04012
ClusterEpendymal	ClustermOli	NRG4	ERBB4	0.0294682	0	NRG4_ERBB4	NRG4 - ERBB4	NRG	Secreted Signaling	KEGG: hsa04012
ClusterImmature	ClustermOli	NRG4	ERBB4	0.00989688	0	NRG4_ERBB4	NRG4 - ERBB4	NRG	Secreted Signaling	KEGG: hsa04012
ClustermGC	ClustermOli	NRG4	ERBB4	0.0128684	0	NRG4_ERBB4	NRG4 - ERBB4	NRG	Secreted Signaling	KEGG: hsa04012
ClusterAstrocytes	ClusterAstrocytes	FGF1	FGFR1	0.00252078	0	FGF1_FGFR1	FGF1 - FGFR1	FGF	Secreted Signaling	PMC: 4393358
ClusterEndothelial	ClusterAstrocytes	FGF1	FGFR1	0.00167785	0	FGF1_FGFR1	FGF1 - FGFR1	FGF	Secreted Signaling	PMC: 4393358
ClusterEpendymal	ClusterAstrocytes	FGF1	FGFR1	0.00140493	0	FGF1_FGFR1	FGF1 - FGFR1	FGF	Secreted Signaling	PMC: 4393358
ClusterNeural Stem	ClusterAstrocytes	FGF1	FGFR1	0.00257537	0	FGF1_FGFR1	FGF1 - FGFR1	FGF	Secreted Signaling	PMC: 4393358
ClusterNeuroblast	ClusterAstrocytes	FGF1	FGFR1	0.0028084	0	FGF1_FGFR1	FGF1 - FGFR1	FGF	Secreted Signaling	PMC: 4393358
ClustermOli	ClusterAstrocytes	FGF1	FGFR1	0.00325934	0	FGF1_FGFR1	FGF1 - FGFR1	FGF	Secreted Signaling	PMC: 4393358
ClusterAstrocytes	ClusterCA2-4_neurons	FGF1	FGFR1	0.00948038	0	FGF1_FGFR1	FGF1 - FGFR1	FGF	Secreted Signaling	PMC: 4393358
ClusterEndothelial	ClusterCA2-4_neurons	FGF1	FGFR1	0.00632496	0	FGF1_FGFR1	FGF1 - FGFR1	FGF	Secreted Signaling	PMC: 4393358
ClusterEpendymal	ClusterCA2-4_neurons	FGF1	FGFR1	0.00530014	0	FGF1_FGFR1	FGF1 - FGFR1	FGF	Secreted Signaling	PMC: 4393358
ClusterNeural Stem	ClusterCA2-4_neurons	FGF1	FGFR1	0.00968422	0	FGF1_FGFR1	FGF1 - FGFR1	FGF	Secreted Signaling	PMC: 4393358
ClusterNeuroblast	ClusterCA2-4_neurons	FGF1	FGFR1	0.0105537	0	FGF1_FGFR1	FGF1 - FGFR1	FGF	Secreted Signaling	PMC: 4393358
ClustermOli	ClusterCA2-4_neurons	FGF1	FGFR1	0.012233	0	FGF1_FGFR1	FGF1 - FGFR1	FGF	Secreted Signaling	PMC: 4393358
ClusterAstrocytes	ClusterCA_neurons	FGF1	FGFR1	0.000359365	0	FGF1_FGFR1	FGF1 - FGFR1	FGF	Secreted Signaling	PMC: 4393358
ClusterEndothelial	ClusterCA_neurons	FGF1	FGFR1	0.000239023	0	FGF1_FGFR1	FGF1 - FGFR1	FGF	Secreted Signaling	PMC: 4393358
ClusterEpendymal	ClusterCA_neurons	FGF1	FGFR1	0.000200096	0	FGF1_FGFR1	FGF1 - FGFR1	FGF	Secreted Signaling	PMC: 4393358
ClusterNeural Stem	ClusterCA_neurons	FGF1	FGFR1	0.000367165	0	FGF1_FGFR1	FGF1 - FGFR1	FGF	Secreted Signaling	PMC: 4393358
ClusterNeuroblast	ClusterCA_neurons	FGF1	FGFR1	0.000400467	0	FGF1_FGFR1	FGF1 - FGFR1	FGF	Secreted Signaling	PMC: 4393358
ClustermOli	ClusterCA_neurons	FGF1	FGFR1	0.00046495	0	FGF1_FGFR1	FGF1 - FGFR1	FGF	Secreted Signaling	PMC: 4393358
ClusterAstrocytes	ClusterEndothelial	FGF1	FGFR1	0.00195832	0	FGF1_FGFR1	FGF1 - FGFR1	FGF	Secreted Signaling	PMC: 4393358
ClusterEndothelial	ClusterEndothelial	FGF1	FGFR1	0.00130322	0	FGF1_FGFR1	FGF1 - FGFR1	FGF	Secreted Signaling	PMC: 4393358
ClusterEpendymal	ClusterEndothelial	FGF1	FGFR1	0.00109117	0	FGF1_FGFR1	FGF1 - FGFR1	FGF	Secreted Signaling	PMC: 4393358
ClusterNeural Stem	ClusterEndothelial	FGF1	FGFR1	0.00200075	0	FGF1_FGFR1	FGF1 - FGFR1	FGF	Secreted Signaling	PMC: 4393358
ClusterNeuroblast	ClusterEndothelial	FGF1	FGFR1	0.0021819	0	FGF1_FGFR1	FGF1 - FGFR1	FGF	Secreted Signaling	PMC: 4393358
ClustermOli	ClusterEndothelial	FGF1	FGFR1	0.0025325	0	FGF1_FGFR1	FGF1 - FGFR1	FGF	Secreted Signaling	PMC: 4393358
ClusterAstrocytes	ClusterEpendymal	FGF1	FGFR1	0.00663692	0	FGF1_FGFR1	FGF1 - FGFR1	FGF	Secreted Signaling	PMC: 4393358
ClusterEndothelial	ClusterEpendymal	FGF1	FGFR1	0.00442368	0	FGF1_FGFR1	FGF1 - FGFR1	FGF	Secreted Signaling	PMC: 4393358
ClusterEpendymal	ClusterEpendymal	FGF1	FGFR1	0.00370577	0	FGF1_FGFR1	FGF1 - FGFR1	FGF	Secreted Signaling	PMC: 4393358
ClusterNeural Stem	ClusterEpendymal	FGF1	FGFR1	0.00678004	0	FGF1_FGFR1	FGF1 - FGFR1	FGF	Secreted Signaling	PMC: 4393358
ClusterNeuroblast	ClusterEpendymal	FGF1	FGFR1	0.00739071	0	FGF1_FGFR1	FGF1 - FGFR1	FGF	Secreted Signaling	PMC: 4393358
ClustermOli	ClusterEpendymal	FGF1	FGFR1	0.0085711	0	FGF1_FGFR1	FGF1 - FGFR1	FGF	Secreted Signaling	PMC: 4393358
ClusterAstrocytes	ClusterGABA_neurons	FGF1	FGFR1	0.00102874	0	FGF1_FGFR1	FGF1 - FGFR1	FGF	Secreted Signaling	PMC: 4393358
ClusterEndothelial	ClusterGABA_neurons	FGF1	FGFR1	0.000684394	0	FGF1_FGFR1	FGF1 - FGFR1	FGF	Secreted Signaling	PMC: 4393358
ClusterEpendymal	ClusterGABA_neurons	FGF1	FGFR1	0.000572977	0	FGF1_FGFR1	FGF1 - FGFR1	FGF	Secreted Signaling	PMC: 4393358
ClusterNeural Stem	ClusterGABA_neurons	FGF1	FGFR1	0.00105105	0	FGF1_FGFR1	FGF1 - FGFR1	FGF	Secreted Signaling	PMC: 4393358
ClusterNeuroblast	ClusterGABA_neurons	FGF1	FGFR1	0.00114631	0	FGF1_FGFR1	FGF1 - FGFR1	FGF	Secreted Signaling	PMC: 4393358
ClustermOli	ClusterGABA_neurons	FGF1	FGFR1	0.00133073	0	FGF1_FGFR1	FGF1 - FGFR1	FGF	Secreted Signaling	PMC: 4393358
ClusterAstrocytes	ClusterImmature	FGF1	FGFR1	0.000283459	0	FGF1_FGFR1	FGF1 - FGFR1	FGF	Secreted Signaling	PMC: 4393358
ClusterEndothelial	ClusterImmature	FGF1	FGFR1	0.000188531	0	FGF1_FGFR1	FGF1 - FGFR1	FGF	Secreted Signaling	PMC: 4393358
ClusterEpendymal	ClusterImmature	FGF1	FGFR1	0.000157826	0	FGF1_FGFR1	FGF1 - FGFR1	FGF	Secreted Signaling	PMC: 4393358
ClusterNeural Stem	ClusterImmature	FGF1	FGFR1	0.000289611	0	FGF1_FGFR1	FGF1 - FGFR1	FGF	Secreted Signaling	PMC: 4393358
ClusterNeuroblast	ClusterImmature	FGF1	FGFR1	0.000315882	0	FGF1_FGFR1	FGF1 - FGFR1	FGF	Secreted Signaling	PMC: 4393358
ClustermOli	ClusterImmature	FGF1	FGFR1	0.00036675	0	FGF1_FGFR1	FGF1 - FGFR1	FGF	Secreted Signaling	PMC: 4393358
ClusterAstrocytes	ClusterNeural Stem	FGF1	FGFR1	0.00339503	0	FGF1_FGFR1	FGF1 - FGFR1	FGF	Secreted Signaling	PMC: 4393358
ClusterEndothelial	ClusterNeural Stem	FGF1	FGFR1	0.00226042	0	FGF1_FGFR1	FGF1 - FGFR1	FGF	Secreted Signaling	PMC: 4393358
ClusterEpendymal	ClusterNeural Stem	FGF1	FGFR1	0.00189291	0	FGF1_FGFR1	FGF1 - FGFR1	FGF	Secreted Signaling	PMC: 4393358
ClusterNeural Stem	ClusterNeural Stem	FGF1	FGFR1	0.00346849	0	FGF1_FGFR1	FGF1 - FGFR1	FGF	Secreted Signaling	PMC: 4393358
ClusterNeuroblast	ClusterNeural Stem	FGF1	FGFR1	0.00378202	0	FGF1_FGFR1	FGF1 - FGFR1	FGF	Secreted Signaling	PMC: 4393358
ClustermOli	ClusterNeural Stem	FGF1	FGFR1	0.00438861	0	FGF1_FGFR1	FGF1 - FGFR1	FGF	Secreted Signaling	PMC: 4393358
ClusterAstrocytes	ClusterOPCs	FGF1	FGFR1	0.0104787	0	FGF1_FGFR1	FGF1 - FGFR1	FGF	Secreted Signaling	PMC: 4393358
ClusterEndothelial	ClusterOPCs	FGF1	FGFR1	0.00699336	0	FGF1_FGFR1	FGF1 - FGFR1	FGF	Secreted Signaling	PMC: 4393358
ClusterEpendymal	ClusterOPCs	FGF1	FGFR1	0.00586088	0	FGF1_FGFR1	FGF1 - FGFR1	FGF	Secreted Signaling	PMC: 4393358
ClusterNeural Stem	ClusterOPCs	FGF1	FGFR1	0.0107038	0	FGF1_FGFR1	FGF1 - FGFR1	FGF	Secreted Signaling	PMC: 4393358
ClusterNeuroblast	ClusterOPCs	FGF1	FGFR1	0.0116637	0	FGF1_FGFR1	FGF1 - FGFR1	FGF	Secreted Signaling	PMC: 4393358
ClustermOli	ClusterOPCs	FGF1	FGFR1	0.0135173	0	FGF1_FGFR1	FGF1 - FGFR1	FGF	Secreted Signaling	PMC: 4393358
ClusterAstrocytes	ClusterAstrocytes	FGF1	FGFR2	0.00790435	0	FGF1_FGFR2	FGF1 - FGFR2	FGF	Secreted Signaling	PMC: 4393358
ClusterEndothelial	ClusterAstrocytes	FGF1	FGFR2	0.0052707	0	FGF1_FGFR2	FGF1 - FGFR2	FGF	Secreted Signaling	PMC: 4393358
ClusterEpendymal	ClusterAstrocytes	FGF1	FGFR2	0.00441594	0	FGF1_FGFR2	FGF1 - FGFR2	FGF	Secreted Signaling	PMC: 4393358
ClusterNeural Stem	ClusterAstrocytes	FGF1	FGFR2	0.00807458	0	FGF1_FGFR2	FGF1 - FGFR2	FGF	Secreted Signaling	PMC: 4393358
ClusterNeuroblast	ClusterAstrocytes	FGF1	FGFR2	0.00880081	0	FGF1_FGFR2	FGF1 - FGFR2	FGF	Secreted Signaling	PMC: 4393358
ClustermOli	ClusterAstrocytes	FGF1	FGFR2	0.0102041	0	FGF1_FGFR2	FGF1 - FGFR2	FGF	Secreted Signaling	PMC: 4393358
ClustermOli	ClusterEndothelial	FGF1	FGFR2	0.00186675	0	FGF1_FGFR2	FGF1 - FGFR2	FGF	Secreted Signaling	PMC: 4393358
ClusterAstrocytes	ClusterEpendymal	FGF1	FGFR2	0.0113257	0	FGF1_FGFR2	FGF1 - FGFR2	FGF	Secreted Signaling	PMC: 4393358
ClusterEndothelial	ClusterEpendymal	FGF1	FGFR2	0.00756081	0	FGF1_FGFR2	FGF1 - FGFR2	FGF	Secreted Signaling	PMC: 4393358
ClusterEpendymal	ClusterEpendymal	FGF1	FGFR2	0.00633703	0	FGF1_FGFR2	FGF1 - FGFR2	FGF	Secreted Signaling	PMC: 4393358
ClusterNeural Stem	ClusterEpendymal	FGF1	FGFR2	0.0115688	0	FGF1_FGFR2	FGF1 - FGFR2	FGF	Secreted Signaling	PMC: 4393358
ClusterNeuroblast	ClusterEpendymal	FGF1	FGFR2	0.0126053	0	FGF1_FGFR2	FGF1 - FGFR2	FGF	Secreted Signaling	PMC: 4393358
ClustermOli	ClusterEpendymal	FGF1	FGFR2	0.0146063	0	FGF1_FGFR2	FGF1 - FGFR2	FGF	Secreted Signaling	PMC: 4393358
ClusterAstrocytes	ClusterNeural Stem	FGF1	FGFR2	0.0105436	0	FGF1_FGFR2	FGF1 - FGFR2	FGF	Secreted Signaling	PMC: 4393358
ClusterEndothelial	ClusterNeural Stem	FGF1	FGFR2	0.00703682	0	FGF1_FGFR2	FGF1 - FGFR2	FGF	Secreted Signaling	PMC: 4393358
ClusterEpendymal	ClusterNeural Stem	FGF1	FGFR2	0.00589734	0	FGF1_FGFR2	FGF1 - FGFR2	FGF	Secreted Signaling	PMC: 4393358
ClusterNeural Stem	ClusterNeural Stem	FGF1	FGFR2	0.0107701	0	FGF1_FGFR2	FGF1 - FGFR2	FGF	Secreted Signaling	PMC: 4393358
ClusterNeuroblast	ClusterNeural Stem	FGF1	FGFR2	0.0117358	0	FGF1_FGFR2	FGF1 - FGFR2	FGF	Secreted Signaling	PMC: 4393358
ClustermOli	ClusterNeural Stem	FGF1	FGFR2	0.0136007	0	FGF1_FGFR2	FGF1 - FGFR2	FGF	Secreted Signaling	PMC: 4393358
ClusterAstrocytes	ClusterNeuroblast	FGF1	FGFR2	0.0150452	0	FGF1_FGFR2	FGF1 - FGFR2	FGF	Secreted Signaling	PMC: 4393358
ClusterEndothelial	ClusterNeuroblast	FGF1	FGFR2	0.0100564	0	FGF1_FGFR2	FGF1 - FGFR2	FGF	Secreted Signaling	PMC: 4393358
ClusterEpendymal	ClusterNeuroblast	FGF1	FGFR2	0.00843215	0	FGF1_FGFR2	FGF1 - FGFR2	FGF	Secreted Signaling	PMC: 4393358
ClusterNeural Stem	ClusterNeuroblast	FGF1	FGFR2	0.0153669	0	FGF1_FGFR2	FGF1 - FGFR2	FGF	Secreted Signaling	PMC: 4393358
ClusterNeuroblast	ClusterNeuroblast	FGF1	FGFR2	0.0167379	0	FGF1_FGFR2	FGF1 - FGFR2	FGF	Secreted Signaling	PMC: 4393358
ClustermOli	ClusterNeuroblast	FGF1	FGFR2	0.019382	0	FGF1_FGFR2	FGF1 - FGFR2	FGF	Secreted Signaling	PMC: 4393358
ClusterAstrocytes	ClustermOli	FGF1	FGFR2	0.0213407	0	FGF1_FGFR2	FGF1 - FGFR2	FGF	Secreted Signaling	PMC: 4393358
ClusterEndothelial	ClustermOli	FGF1	FGFR2	0.0142947	0	FGF1_FGFR2	FGF1 - FGFR2	FGF	Secreted Signaling	PMC: 4393358
ClusterEpendymal	ClustermOli	FGF1	FGFR2	0.0119942	0	FGF1_FGFR2	FGF1 - FGFR2	FGF	Secreted Signaling	PMC: 4393358
ClusterNeural Stem	ClustermOli	FGF1	FGFR2	0.0217939	0	FGF1_FGFR2	FGF1 - FGFR2	FGF	Secreted Signaling	PMC: 4393358
ClusterNeuroblast	ClustermOli	FGF1	FGFR2	0.0237246	0	FGF1_FGFR2	FGF1 - FGFR2	FGF	Secreted Signaling	PMC: 4393358
ClustermOli	ClustermOli	FGF1	FGFR2	0.0274416	0	FGF1_FGFR2	FGF1 - FGFR2	FGF	Secreted Signaling	PMC: 4393358
ClusterAstrocytes	ClusterAstrocytes	FGF1	FGFR3	0.0042232	0	FGF1_FGFR3	FGF1 - FGFR3	FGF	Secreted Signaling	PMC: 4393358
ClusterEndothelial	ClusterAstrocytes	FGF1	FGFR3	0.00281259	0	FGF1_FGFR3	FGF1 - FGFR3	FGF	Secreted Signaling	PMC: 4393358
ClusterEpendymal	ClusterAstrocytes	FGF1	FGFR3	0.00235553	0	FGF1_FGFR3	FGF1 - FGFR3	FGF	Secreted Signaling	PMC: 4393358
ClusterNeural Stem	ClusterAstrocytes	FGF1	FGFR3	0.00431449	0	FGF1_FGFR3	FGF1 - FGFR3	FGF	Secreted Signaling	PMC: 4393358
ClusterNeuroblast	ClusterAstrocytes	FGF1	FGFR3	0.00470414	0	FGF1_FGFR3	FGF1 - FGFR3	FGF	Secreted Signaling	PMC: 4393358
ClustermOli	ClusterAstrocytes	FGF1	FGFR3	0.00545781	0	FGF1_FGFR3	FGF1 - FGFR3	FGF	Secreted Signaling	PMC: 4393358
ClusterAstrocytes	ClusterEpendymal	FGF1	FGFR3	0.00117311	0	FGF1_FGFR3	FGF1 - FGFR3	FGF	Secreted Signaling	PMC: 4393358
ClusterEndothelial	ClusterEpendymal	FGF1	FGFR3	0.000780477	0	FGF1_FGFR3	FGF1 - FGFR3	FGF	Secreted Signaling	PMC: 4393358
ClusterEpendymal	ClusterEpendymal	FGF1	FGFR3	0.000653428	0	FGF1_FGFR3	FGF1 - FGFR3	FGF	Secreted Signaling	PMC: 4393358
ClusterNeural Stem	ClusterEpendymal	FGF1	FGFR3	0.00119855	0	FGF1_FGFR3	FGF1 - FGFR3	FGF	Secreted Signaling	PMC: 4393358
ClusterNeuroblast	ClusterEpendymal	FGF1	FGFR3	0.00130716	0	FGF1_FGFR3	FGF1 - FGFR3	FGF	Secreted Signaling	PMC: 4393358
ClustermOli	ClusterEpendymal	FGF1	FGFR3	0.00151742	0	FGF1_FGFR3	FGF1 - FGFR3	FGF	Secreted Signaling	PMC: 4393358
ClusterAstrocytes	ClusterNeural Stem	FGF1	FGFR3	0.0034104	0	FGF1_FGFR3	FGF1 - FGFR3	FGF	Secreted Signaling	PMC: 4393358
ClusterEndothelial	ClusterNeural Stem	FGF1	FGFR3	0.00227066	0	FGF1_FGFR3	FGF1 - FGFR3	FGF	Secreted Signaling	PMC: 4393358
ClusterEpendymal	ClusterNeural Stem	FGF1	FGFR3	0.00190149	0	FGF1_FGFR3	FGF1 - FGFR3	FGF	Secreted Signaling	PMC: 4393358
ClusterNeural Stem	ClusterNeural Stem	FGF1	FGFR3	0.00348418	0	FGF1_FGFR3	FGF1 - FGFR3	FGF	Secreted Signaling	PMC: 4393358
ClusterNeuroblast	ClusterNeural Stem	FGF1	FGFR3	0.00379913	0	FGF1_FGFR3	FGF1 - FGFR3	FGF	Secreted Signaling	PMC: 4393358
ClustermOli	ClusterNeural Stem	FGF1	FGFR3	0.00440845	0	FGF1_FGFR3	FGF1 - FGFR3	FGF	Secreted Signaling	PMC: 4393358
ClusterAstrocytes	ClusterAstrocytes	FGF2	FGFR1	0.00701114	0	FGF2_FGFR1	FGF2 - FGFR1	FGF	Secreted Signaling	PMC: 4393358
ClusterEndothelial	ClusterAstrocytes	FGF2	FGFR1	0.00116821	0	FGF2_FGFR1	FGF2 - FGFR1	FGF	Secreted Signaling	PMC: 4393358
ClusterEpendymal	ClusterAstrocytes	FGF2	FGFR1	0.00521478	0	FGF2_FGFR1	FGF2 - FGFR1	FGF	Secreted Signaling	PMC: 4393358
ClusterNeural Stem	ClusterAstrocytes	FGF2	FGFR1	0.00923606	0	FGF2_FGFR1	FGF2 - FGFR1	FGF	Secreted Signaling	PMC: 4393358
ClusterAstrocytes	ClusterCA2-4_neurons	FGF2	FGFR1	0.0260444	0	FGF2_FGFR1	FGF2 - FGFR1	FGF	Secreted Signaling	PMC: 4393358
ClusterEndothelial	ClusterCA2-4_neurons	FGF2	FGFR1	0.00441001	0	FGF2_FGFR1	FGF2 - FGFR1	FGF	Secreted Signaling	PMC: 4393358
ClusterEpendymal	ClusterCA2-4_neurons	FGF2	FGFR1	0.0194671	0	FGF2_FGFR1	FGF2 - FGFR1	FGF	Secreted Signaling	PMC: 4393358
ClusterNeural Stem	ClusterCA2-4_neurons	FGF2	FGFR1	0.034102	0	FGF2_FGFR1	FGF2 - FGFR1	FGF	Secreted Signaling	PMC: 4393358
ClusterAstrocytes	ClusterCA_neurons	FGF2	FGFR1	0.00100339	0	FGF2_FGFR1	FGF2 - FGFR1	FGF	Secreted Signaling	PMC: 4393358
ClusterEndothelial	ClusterCA_neurons	FGF2	FGFR1	0.000166347	0	FGF2_FGFR1	FGF2 - FGFR1	FGF	Secreted Signaling	PMC: 4393358
ClusterEpendymal	ClusterCA_neurons	FGF2	FGFR1	0.000745151	0	FGF2_FGFR1	FGF2 - FGFR1	FGF	Secreted Signaling	PMC: 4393358
ClusterNeural Stem	ClusterCA_neurons	FGF2	FGFR1	0.00132435	0	FGF2_FGFR1	FGF2 - FGFR1	FGF	Secreted Signaling	PMC: 4393358
ClusterAstrocytes	ClusterEndothelial	FGF2	FGFR1	0.00545222	0	FGF2_FGFR1	FGF2 - FGFR1	FGF	Secreted Signaling	PMC: 4393358
ClusterEndothelial	ClusterEndothelial	FGF2	FGFR1	0.000907271	0	FGF2_FGFR1	FGF2 - FGFR1	FGF	Secreted Signaling	PMC: 4393358
ClusterEpendymal	ClusterEndothelial	FGF2	FGFR1	0.00405366	0	FGF2_FGFR1	FGF2 - FGFR1	FGF	Secreted Signaling	PMC: 4393358
ClusterNeural Stem	ClusterEndothelial	FGF2	FGFR1	0.00718602	0	FGF2_FGFR1	FGF2 - FGFR1	FGF	Secreted Signaling	PMC: 4393358
ClusterAstrocytes	ClusterEpendymal	FGF2	FGFR1	0.0183248	0	FGF2_FGFR1	FGF2 - FGFR1	FGF	Secreted Signaling	PMC: 4393358
ClusterEndothelial	ClusterEpendymal	FGF2	FGFR1	0.00308258	0	FGF2_FGFR1	FGF2 - FGFR1	FGF	Secreted Signaling	PMC: 4393358
ClusterEpendymal	ClusterEpendymal	FGF2	FGFR1	0.0136696	0	FGF2_FGFR1	FGF2 - FGFR1	FGF	Secreted Signaling	PMC: 4393358
ClusterNeural Stem	ClusterEpendymal	FGF2	FGFR1	0.0240531	0	FGF2_FGFR1	FGF2 - FGFR1	FGF	Secreted Signaling	PMC: 4393358
ClusterAstrocytes	ClusterGABA_neurons	FGF2	FGFR1	0.00286892	0	FGF2_FGFR1	FGF2 - FGFR1	FGF	Secreted Signaling	PMC: 4393358
ClusterEndothelial	ClusterGABA_neurons	FGF2	FGFR1	0.000476368	0	FGF2_FGFR1	FGF2 - FGFR1	FGF	Secreted Signaling	PMC: 4393358
ClusterEpendymal	ClusterGABA_neurons	FGF2	FGFR1	0.00213158	0	FGF2_FGFR1	FGF2 - FGFR1	FGF	Secreted Signaling	PMC: 4393358
ClusterNeural Stem	ClusterGABA_neurons	FGF2	FGFR1	0.00378435	0	FGF2_FGFR1	FGF2 - FGFR1	FGF	Secreted Signaling	PMC: 4393358
ClusterAstrocytes	ClusterImmature	FGF2	FGFR1	0.000791557	0	FGF2_FGFR1	FGF2 - FGFR1	FGF	Secreted Signaling	PMC: 4393358
ClusterEndothelial	ClusterImmature	FGF2	FGFR1	0.000131206	0	FGF2_FGFR1	FGF2 - FGFR1	FGF	Secreted Signaling	PMC: 4393358
ClusterEpendymal	ClusterImmature	FGF2	FGFR1	0.000587805	0	FGF2_FGFR1	FGF2 - FGFR1	FGF	Secreted Signaling	PMC: 4393358
ClusterNeural Stem	ClusterImmature	FGF2	FGFR1	0.00104483	0	FGF2_FGFR1	FGF2 - FGFR1	FGF	Secreted Signaling	PMC: 4393358
ClusterAstrocytes	ClusterNeural Stem	FGF2	FGFR1	0.00942801	0	FGF2_FGFR1	FGF2 - FGFR1	FGF	Secreted Signaling	PMC: 4393358
ClusterEndothelial	ClusterNeural Stem	FGF2	FGFR1	0.0015741	0	FGF2_FGFR1	FGF2 - FGFR1	FGF	Secreted Signaling	PMC: 4393358
ClusterEpendymal	ClusterNeural Stem	FGF2	FGFR1	0.00701679	0	FGF2_FGFR1	FGF2 - FGFR1	FGF	Secreted Signaling	PMC: 4393358
ClusterNeural Stem	ClusterNeural Stem	FGF2	FGFR1	0.0124103	0	FGF2_FGFR1	FGF2 - FGFR1	FGF	Secreted Signaling	PMC: 4393358
ClusterAstrocytes	ClusterOPCs	FGF2	FGFR1	0.0287364	0	FGF2_FGFR1	FGF2 - FGFR1	FGF	Secreted Signaling	PMC: 4393358
ClusterEndothelial	ClusterOPCs	FGF2	FGFR1	0.00487704	0	FGF2_FGFR1	FGF2 - FGFR1	FGF	Secreted Signaling	PMC: 4393358
ClusterEpendymal	ClusterOPCs	FGF2	FGFR1	0.0214942	0	FGF2_FGFR1	FGF2 - FGFR1	FGF	Secreted Signaling	PMC: 4393358
ClusterNeural Stem	ClusterOPCs	FGF2	FGFR1	0.0375947	0	FGF2_FGFR1	FGF2 - FGFR1	FGF	Secreted Signaling	PMC: 4393358
ClusterAstrocytes	ClusterAstrocytes	FGF2	FGFR2	0.0217753	0	FGF2_FGFR2	FGF2 - FGFR2	FGF	Secreted Signaling	PMC: 4393358
ClusterEndothelial	ClusterAstrocytes	FGF2	FGFR2	0.00367376	0	FGF2_FGFR2	FGF2 - FGFR2	FGF	Secreted Signaling	PMC: 4393358
ClusterEpendymal	ClusterAstrocytes	FGF2	FGFR2	0.0162581	0	FGF2_FGFR2	FGF2 - FGFR2	FGF	Secreted Signaling	PMC: 4393358
ClusterNeural Stem	ClusterAstrocytes	FGF2	FGFR2	0.0285508	0	FGF2_FGFR2	FGF2 - FGFR2	FGF	Secreted Signaling	PMC: 4393358
ClusterAstrocytes	ClusterEndothelial	FGF2	FGFR2	0.00402203	0	FGF2_FGFR2	FGF2 - FGFR2	FGF	Secreted Signaling	PMC: 4393358
ClusterEndothelial	ClusterEndothelial	FGF2	FGFR2	0.00066848	0	FGF2_FGFR2	FGF2 - FGFR2	FGF	Secreted Signaling	PMC: 4393358
ClusterEpendymal	ClusterEndothelial	FGF2	FGFR2	0.00298922	0	FGF2_FGFR2	FGF2 - FGFR2	FGF	Secreted Signaling	PMC: 4393358
ClusterNeural Stem	ClusterEndothelial	FGF2	FGFR2	0.00530345	0	FGF2_FGFR2	FGF2 - FGFR2	FGF	Secreted Signaling	PMC: 4393358
ClusterAstrocytes	ClusterEpendymal	FGF2	FGFR2	0.0310131	0	FGF2_FGFR2	FGF2 - FGFR2	FGF	Secreted Signaling	PMC: 4393358
ClusterEndothelial	ClusterEpendymal	FGF2	FGFR2	0.00527368	0	FGF2_FGFR2	FGF2 - FGFR2	FGF	Secreted Signaling	PMC: 4393358
ClusterEpendymal	ClusterEpendymal	FGF2	FGFR2	0.0232108	0	FGF2_FGFR2	FGF2 - FGFR2	FGF	Secreted Signaling	PMC: 4393358
ClusterNeural Stem	ClusterEpendymal	FGF2	FGFR2	0.0405438	0	FGF2_FGFR2	FGF2 - FGFR2	FGF	Secreted Signaling	PMC: 4393358
ClusterAstrocytes	ClusterNeural Stem	FGF2	FGFR2	0.0289111	0	FGF2_FGFR2	FGF2 - FGFR2	FGF	Secreted Signaling	PMC: 4393358
ClusterEndothelial	ClusterNeural Stem	FGF2	FGFR2	0.00490741	0	FGF2_FGFR2	FGF2 - FGFR2	FGF	Secreted Signaling	PMC: 4393358
ClusterEpendymal	ClusterNeural Stem	FGF2	FGFR2	0.0216259	0	FGF2_FGFR2	FGF2 - FGFR2	FGF	Secreted Signaling	PMC: 4393358
ClusterNeural Stem	ClusterNeural Stem	FGF2	FGFR2	0.0378211	0	FGF2_FGFR2	FGF2 - FGFR2	FGF	Secreted Signaling	PMC: 4393358
ClusterAstrocytes	ClusterNeuroblast	FGF2	FGFR2	0.0409304	0	FGF2_FGFR2	FGF2 - FGFR2	FGF	Secreted Signaling	PMC: 4393358
ClusterEndothelial	ClusterNeuroblast	FGF2	FGFR2	0.00701972	0	FGF2_FGFR2	FGF2 - FGFR2	FGF	Secreted Signaling	PMC: 4393358
ClusterEpendymal	ClusterNeuroblast	FGF2	FGFR2	0.0307123	0	FGF2_FGFR2	FGF2 - FGFR2	FGF	Secreted Signaling	PMC: 4393358
ClusterNeural Stem	ClusterNeuroblast	FGF2	FGFR2	0.0533411	0	FGF2_FGFR2	FGF2 - FGFR2	FGF	Secreted Signaling	PMC: 4393358
ClusterAstrocytes	ClustermOli	FGF2	FGFR2	0.0574257	0	FGF2_FGFR2	FGF2 - FGFR2	FGF	Secreted Signaling	PMC: 4393358
ClusterEndothelial	ClustermOli	FGF2	FGFR2	0.00999109	0	FGF2_FGFR2	FGF2 - FGFR2	FGF	Secreted Signaling	PMC: 4393358
ClusterEpendymal	ClustermOli	FGF2	FGFR2	0.0432753	0	FGF2_FGFR2	FGF2 - FGFR2	FGF	Secreted Signaling	PMC: 4393358
ClusterNeural Stem	ClustermOli	FGF2	FGFR2	0.0744497	0	FGF2_FGFR2	FGF2 - FGFR2	FGF	Secreted Signaling	PMC: 4393358
ClusterAstrocytes	ClusterAstrocytes	FGF2	FGFR3	0.0117105	0	FGF2_FGFR3	FGF2 - FGFR3	FGF	Secreted Signaling	PMC: 4393358
ClusterEndothelial	ClusterAstrocytes	FGF2	FGFR3	0.00195895	0	FGF2_FGFR3	FGF2 - FGFR3	FGF	Secreted Signaling	PMC: 4393358
ClusterEpendymal	ClusterAstrocytes	FGF2	FGFR3	0.0087207	0	FGF2_FGFR3	FGF2 - FGFR3	FGF	Secreted Signaling	PMC: 4393358
ClusterNeural Stem	ClusterAstrocytes	FGF2	FGFR3	0.0154036	0	FGF2_FGFR3	FGF2 - FGFR3	FGF	Secreted Signaling	PMC: 4393358
ClusterAstrocytes	ClusterEpendymal	FGF2	FGFR3	0.00327069	0	FGF2_FGFR3	FGF2 - FGFR3	FGF	Secreted Signaling	PMC: 4393358
ClusterEndothelial	ClusterEpendymal	FGF2	FGFR3	0.000543261	0	FGF2_FGFR3	FGF2 - FGFR3	FGF	Secreted Signaling	PMC: 4393358
ClusterEpendymal	ClusterEpendymal	FGF2	FGFR3	0.00243034	0	FGF2_FGFR3	FGF2 - FGFR3	FGF	Secreted Signaling	PMC: 4393358
ClusterNeural Stem	ClusterEpendymal	FGF2	FGFR3	0.00431377	0	FGF2_FGFR3	FGF2 - FGFR3	FGF	Secreted Signaling	PMC: 4393358
ClusterAstrocytes	ClusterNeural Stem	FGF2	FGFR3	0.00947042	0	FGF2_FGFR3	FGF2 - FGFR3	FGF	Secreted Signaling	PMC: 4393358
ClusterEndothelial	ClusterNeural Stem	FGF2	FGFR3	0.00158124	0	FGF2_FGFR3	FGF2 - FGFR3	FGF	Secreted Signaling	PMC: 4393358
ClusterEpendymal	ClusterNeural Stem	FGF2	FGFR3	0.00704843	0	FGF2_FGFR3	FGF2 - FGFR3	FGF	Secreted Signaling	PMC: 4393358
ClusterNeural Stem	ClusterNeural Stem	FGF2	FGFR3	0.012466	0	FGF2_FGFR3	FGF2 - FGFR3	FGF	Secreted Signaling	PMC: 4393358
ClusterCA2-4_neurons	ClusterAstrocytes	FGF5	FGFR1	0.00401135	0	FGF5_FGFR1	FGF5 - FGFR1	FGF	Secreted Signaling	PMC: 4393358
ClusterCA2-4_neurons	ClusterCA2-4_neurons	FGF5	FGFR1	0.0150243	0	FGF5_FGFR1	FGF5 - FGFR1	FGF	Secreted Signaling	PMC: 4393358
ClusterCA2-4_neurons	ClusterCA_neurons	FGF5	FGFR1	0.000572597	0	FGF5_FGFR1	FGF5 - FGFR1	FGF	Secreted Signaling	PMC: 4393358
ClusterCA2-4_neurons	ClusterEndothelial	FGF5	FGFR1	0.00311734	0	FGF5_FGFR1	FGF5 - FGFR1	FGF	Secreted Signaling	PMC: 4393358
ClusterCA2-4_neurons	ClusterEpendymal	FGF5	FGFR1	0.0105357	0	FGF5_FGFR1	FGF5 - FGFR1	FGF	Secreted Signaling	PMC: 4393358
ClusterCA2-4_neurons	ClusterGABA_neurons	FGF5	FGFR1	0.0016385	0	FGF5_FGFR1	FGF5 - FGFR1	FGF	Secreted Signaling	PMC: 4393358
ClusterCA2-4_neurons	ClusterImmature	FGF5	FGFR1	0.000451671	0	FGF5_FGFR1	FGF5 - FGFR1	FGF	Secreted Signaling	PMC: 4393358
ClusterCA2-4_neurons	ClusterNeural Stem	FGF5	FGFR1	0.00539976	0	FGF5_FGFR1	FGF5 - FGFR1	FGF	Secreted Signaling	PMC: 4393358
ClusterCA2-4_neurons	ClusterOPCs	FGF5	FGFR1	0.0165966	0	FGF5_FGFR1	FGF5 - FGFR1	FGF	Secreted Signaling	PMC: 4393358
ClusterCA2-4_neurons	ClusterAstrocytes	FGF5	FGFR2	0.0125383	0	FGF5_FGFR2	FGF5 - FGFR2	FGF	Secreted Signaling	PMC: 4393358
ClusterCA2-4_neurons	ClusterEndothelial	FGF5	FGFR2	0.0022982	0	FGF5_FGFR2	FGF5 - FGFR2	FGF	Secreted Signaling	PMC: 4393358
ClusterCA2-4_neurons	ClusterEpendymal	FGF5	FGFR2	0.0179293	0	FGF5_FGFR2	FGF5 - FGFR2	FGF	Secreted Signaling	PMC: 4393358
ClusterCA2-4_neurons	ClusterNeural Stem	FGF5	FGFR2	0.0166988	0	FGF5_FGFR2	FGF5 - FGFR2	FGF	Secreted Signaling	PMC: 4393358
ClusterCA2-4_neurons	ClusterNeuroblast	FGF5	FGFR2	0.0237653	0	FGF5_FGFR2	FGF5 - FGFR2	FGF	Secreted Signaling	PMC: 4393358
ClusterCA2-4_neurons	ClustermOli	FGF5	FGFR2	0.0335851	0	FGF5_FGFR2	FGF5 - FGFR2	FGF	Secreted Signaling	PMC: 4393358
ClusterCA2-4_neurons	ClusterAstrocytes	FGF5	FGFR3	0.00671366	0	FGF5_FGFR3	FGF5 - FGFR3	FGF	Secreted Signaling	PMC: 4393358
ClusterCA2-4_neurons	ClusterEpendymal	FGF5	FGFR3	0.00186828	0	FGF5_FGFR3	FGF5 - FGFR3	FGF	Secreted Signaling	PMC: 4393358
ClusterCA2-4_neurons	ClusterNeural Stem	FGF5	FGFR3	0.00542416	0	FGF5_FGFR3	FGF5 - FGFR3	FGF	Secreted Signaling	PMC: 4393358
ClusterCA2-4_neurons	ClusterAstrocytes	FGF9	FGFR1	0.000816965	0	FGF9_FGFR1	FGF9 - FGFR1	FGF	Secreted Signaling	PMC: 4393358
ClusterCA_neurons	ClusterAstrocytes	FGF9	FGFR1	0.000442653	0	FGF9_FGFR1	FGF9 - FGFR1	FGF	Secreted Signaling	PMC: 4393358
ClusterGABA_neurons	ClusterAstrocytes	FGF9	FGFR1	0.00113974	0	FGF9_FGFR1	FGF9 - FGFR1	FGF	Secreted Signaling	PMC: 4393358
ClusterImmature	ClusterAstrocytes	FGF9	FGFR1	0.000782391	0	FGF9_FGFR1	FGF9 - FGFR1	FGF	Secreted Signaling	PMC: 4393358
ClustermGC	ClusterAstrocytes	FGF9	FGFR1	0.000923252	0	FGF9_FGFR1	FGF9 - FGFR1	FGF	Secreted Signaling	PMC: 4393358
ClusterCA2-4_neurons	ClusterCA2-4_neurons	FGF9	FGFR1	0.00308708	0	FGF9_FGFR1	FGF9 - FGFR1	FGF	Secreted Signaling	PMC: 4393358
ClusterCA_neurons	ClusterCA2-4_neurons	FGF9	FGFR1	0.0016744	0	FGF9_FGFR1	FGF9 - FGFR1	FGF	Secreted Signaling	PMC: 4393358
ClusterGABA_neurons	ClusterCA2-4_neurons	FGF9	FGFR1	0.00430288	0	FGF9_FGFR1	FGF9 - FGFR1	FGF	Secreted Signaling	PMC: 4393358
ClusterImmature	ClusterCA2-4_neurons	FGF9	FGFR1	0.00295672	0	FGF9_FGFR1	FGF9 - FGFR1	FGF	Secreted Signaling	PMC: 4393358
ClustermGC	ClusterCA2-4_neurons	FGF9	FGFR1	0.00348767	0	FGF9_FGFR1	FGF9 - FGFR1	FGF	Secreted Signaling	PMC: 4393358
ClusterCA2-4_neurons	ClusterCA_neurons	FGF9	FGFR1	0.000116297	0	FGF9_FGFR1	FGF9 - FGFR1	FGF	Secreted Signaling	PMC: 4393358
ClusterCA_neurons	ClusterCA_neurons	FGF9	FGFR1	6.29926e-05	0	FGF9_FGFR1	FGF9 - FGFR1	FGF	Secreted Signaling	PMC: 4393358
ClusterGABA_neurons	ClusterCA_neurons	FGF9	FGFR1	0.000162289	0	FGF9_FGFR1	FGF9 - FGFR1	FGF	Secreted Signaling	PMC: 4393358
ClusterImmature	ClusterCA_neurons	FGF9	FGFR1	0.000111372	0	FGF9_FGFR1	FGF9 - FGFR1	FGF	Secreted Signaling	PMC: 4393358
ClustermGC	ClusterCA_neurons	FGF9	FGFR1	0.000131439	0	FGF9_FGFR1	FGF9 - FGFR1	FGF	Secreted Signaling	PMC: 4393358
ClusterCA2-4_neurons	ClusterEndothelial	FGF9	FGFR1	0.000634434	0	FGF9_FGFR1	FGF9 - FGFR1	FGF	Secreted Signaling	PMC: 4393358
ClusterCA_neurons	ClusterEndothelial	FGF9	FGFR1	0.000343725	0	FGF9_FGFR1	FGF9 - FGFR1	FGF	Secreted Signaling	PMC: 4393358
ClusterGABA_neurons	ClusterEndothelial	FGF9	FGFR1	0.000885155	0	FGF9_FGFR1	FGF9 - FGFR1	FGF	Secreted Signaling	PMC: 4393358
ClusterImmature	ClusterEndothelial	FGF9	FGFR1	0.000607581	0	FGF9_FGFR1	FGF9 - FGFR1	FGF	Secreted Signaling	PMC: 4393358
ClustermGC	ClusterEndothelial	FGF9	FGFR1	0.000716991	0	FGF9_FGFR1	FGF9 - FGFR1	FGF	Secreted Signaling	PMC: 4393358
ClusterCA2-4_neurons	ClusterEpendymal	FGF9	FGFR1	0.00215699	0	FGF9_FGFR1	FGF9 - FGFR1	FGF	Secreted Signaling	PMC: 4393358
ClusterCA_neurons	ClusterEpendymal	FGF9	FGFR1	0.00116943	0	FGF9_FGFR1	FGF9 - FGFR1	FGF	Secreted Signaling	PMC: 4393358
ClusterGABA_neurons	ClusterEpendymal	FGF9	FGFR1	0.00300759	0	FGF9_FGFR1	FGF9 - FGFR1	FGF	Secreted Signaling	PMC: 4393358
ClusterImmature	ClusterEpendymal	FGF9	FGFR1	0.00206582	0	FGF9_FGFR1	FGF9 - FGFR1	FGF	Secreted Signaling	PMC: 4393358
ClustermGC	ClusterEpendymal	FGF9	FGFR1	0.00243719	0	FGF9_FGFR1	FGF9 - FGFR1	FGF	Secreted Signaling	PMC: 4393358
ClusterCA2-4_neurons	ClusterGABA_neurons	FGF9	FGFR1	0.00033307	0	FGF9_FGFR1	FGF9 - FGFR1	FGF	Secreted Signaling	PMC: 4393358
ClusterCA_neurons	ClusterGABA_neurons	FGF9	FGFR1	0.000180426	0	FGF9_FGFR1	FGF9 - FGFR1	FGF	Secreted Signaling	PMC: 4393358
ClusterGABA_neurons	ClusterGABA_neurons	FGF9	FGFR1	0.00046475	0	FGF9_FGFR1	FGF9 - FGFR1	FGF	Secreted Signaling	PMC: 4393358
ClusterImmature	ClusterGABA_neurons	FGF9	FGFR1	0.000318968	0	FGF9_FGFR1	FGF9 - FGFR1	FGF	Secreted Signaling	PMC: 4393358
ClustermGC	ClusterGABA_neurons	FGF9	FGFR1	0.000376426	0	FGF9_FGFR1	FGF9 - FGFR1	FGF	Secreted Signaling	PMC: 4393358
ClusterCA2-4_neurons	ClusterImmature	FGF9	FGFR1	9.17277e-05	0	FGF9_FGFR1	FGF9 - FGFR1	FGF	Secreted Signaling	PMC: 4393358
ClusterCA_neurons	ClusterImmature	FGF9	FGFR1	4.9684e-05	0	FGF9_FGFR1	FGF9 - FGFR1	FGF	Secreted Signaling	PMC: 4393358
ClusterGABA_neurons	ClusterImmature	FGF9	FGFR1	0.000128005	0	FGF9_FGFR1	FGF9 - FGFR1	FGF	Secreted Signaling	PMC: 4393358
ClusterImmature	ClusterImmature	FGF9	FGFR1	8.78431e-05	0	FGF9_FGFR1	FGF9 - FGFR1	FGF	Secreted Signaling	PMC: 4393358
ClustermGC	ClusterImmature	FGF9	FGFR1	0.000103671	0	FGF9_FGFR1	FGF9 - FGFR1	FGF	Secreted Signaling	PMC: 4393358
ClusterCA2-4_neurons	ClusterNeural Stem	FGF9	FGFR1	0.00110095	0	FGF9_FGFR1	FGF9 - FGFR1	FGF	Secreted Signaling	PMC: 4393358
ClusterCA_neurons	ClusterNeural Stem	FGF9	FGFR1	0.000596604	0	FGF9_FGFR1	FGF9 - FGFR1	FGF	Secreted Signaling	PMC: 4393358
ClusterGABA_neurons	ClusterNeural Stem	FGF9	FGFR1	0.00153575	0	FGF9_FGFR1	FGF9 - FGFR1	FGF	Secreted Signaling	PMC: 4393358
ClusterImmature	ClusterNeural Stem	FGF9	FGFR1	0.00105438	0	FGF9_FGFR1	FGF9 - FGFR1	FGF	Secreted Signaling	PMC: 4393358
ClustermGC	ClusterNeural Stem	FGF9	FGFR1	0.00124414	0	FGF9_FGFR1	FGF9 - FGFR1	FGF	Secreted Signaling	PMC: 4393358
ClusterCA2-4_neurons	ClusterOPCs	FGF9	FGFR1	0.00341448	0	FGF9_FGFR1	FGF9 - FGFR1	FGF	Secreted Signaling	PMC: 4393358
ClusterCA_neurons	ClusterOPCs	FGF9	FGFR1	0.00185226	0	FGF9_FGFR1	FGF9 - FGFR1	FGF	Secreted Signaling	PMC: 4393358
ClusterGABA_neurons	ClusterOPCs	FGF9	FGFR1	0.00475861	0	FGF9_FGFR1	FGF9 - FGFR1	FGF	Secreted Signaling	PMC: 4393358
ClusterImmature	ClusterOPCs	FGF9	FGFR1	0.00327034	0	FGF9_FGFR1	FGF9 - FGFR1	FGF	Secreted Signaling	PMC: 4393358
ClustermGC	ClusterOPCs	FGF9	FGFR1	0.0038574	0	FGF9_FGFR1	FGF9 - FGFR1	FGF	Secreted Signaling	PMC: 4393358
ClusterCA2-4_neurons	ClusterAstrocytes	FGF9	FGFR2	0.00257112	0	FGF9_FGFR2	FGF9 - FGFR2	FGF	Secreted Signaling	PMC: 4393358
ClusterCA_neurons	ClusterAstrocytes	FGF9	FGFR2	0.00139422	0	FGF9_FGFR2	FGF9 - FGFR2	FGF	Secreted Signaling	PMC: 4393358
ClusterGABA_neurons	ClusterAstrocytes	FGF9	FGFR2	0.00358444	0	FGF9_FGFR2	FGF9 - FGFR2	FGF	Secreted Signaling	PMC: 4393358
ClusterImmature	ClusterAstrocytes	FGF9	FGFR2	0.00246249	0	FGF9_FGFR2	FGF9 - FGFR2	FGF	Secreted Signaling	PMC: 4393358
ClustermGC	ClusterAstrocytes	FGF9	FGFR2	0.00290496	0	FGF9_FGFR2	FGF9 - FGFR2	FGF	Secreted Signaling	PMC: 4393358
ClusterCA2-4_neurons	ClusterEndothelial	FGF9	FGFR2	0.000467419	0	FGF9_FGFR2	FGF9 - FGFR2	FGF	Secreted Signaling	PMC: 4393358
ClusterCA_neurons	ClusterEndothelial	FGF9	FGFR2	0.00025322	0	FGF9_FGFR2	FGF9 - FGFR2	FGF	Secreted Signaling	PMC: 4393358
ClusterGABA_neurons	ClusterEndothelial	FGF9	FGFR2	0.00065218	0	FGF9_FGFR2	FGF9 - FGFR2	FGF	Secreted Signaling	PMC: 4393358
ClusterImmature	ClusterEndothelial	FGF9	FGFR2	0.000447632	0	FGF9_FGFR2	FGF9 - FGFR2	FGF	Secreted Signaling	PMC: 4393358
ClustermGC	ClusterEndothelial	FGF9	FGFR2	0.000528254	0	FGF9_FGFR2	FGF9 - FGFR2	FGF	Secreted Signaling	PMC: 4393358
ClusterCA2-4_neurons	ClusterEpendymal	FGF9	FGFR2	0.00369262	0	FGF9_FGFR2	FGF9 - FGFR2	FGF	Secreted Signaling	PMC: 4393358
ClusterCA_neurons	ClusterEpendymal	FGF9	FGFR2	0.0020034	0	FGF9_FGFR2	FGF9 - FGFR2	FGF	Secreted Signaling	PMC: 4393358
ClusterGABA_neurons	ClusterEpendymal	FGF9	FGFR2	0.00514567	0	FGF9_FGFR2	FGF9 - FGFR2	FGF	Secreted Signaling	PMC: 4393358
ClusterImmature	ClusterEpendymal	FGF9	FGFR2	0.00353678	0	FGF9_FGFR2	FGF9 - FGFR2	FGF	Secreted Signaling	PMC: 4393358
ClustermGC	ClusterEpendymal	FGF9	FGFR2	0.00417147	0	FGF9_FGFR2	FGF9 - FGFR2	FGF	Secreted Signaling	PMC: 4393358
ClusterCA2-4_neurons	ClusterNeural Stem	FGF9	FGFR2	0.00343578	0	FGF9_FGFR2	FGF9 - FGFR2	FGF	Secreted Signaling	PMC: 4393358
ClusterCA_neurons	ClusterNeural Stem	FGF9	FGFR2	0.00186383	0	FGF9_FGFR2	FGF9 - FGFR2	FGF	Secreted Signaling	PMC: 4393358
ClusterGABA_neurons	ClusterNeural Stem	FGF9	FGFR2	0.00478825	0	FGF9_FGFR2	FGF9 - FGFR2	FGF	Secreted Signaling	PMC: 4393358
ClusterImmature	ClusterNeural Stem	FGF9	FGFR2	0.00329074	0	FGF9_FGFR2	FGF9 - FGFR2	FGF	Secreted Signaling	PMC: 4393358
ClustermGC	ClusterNeural Stem	FGF9	FGFR2	0.00388145	0	FGF9_FGFR2	FGF9 - FGFR2	FGF	Secreted Signaling	PMC: 4393358
ClusterCA2-4_neurons	ClusterNeuroblast	FGF9	FGFR2	0.00491778	0	FGF9_FGFR2	FGF9 - FGFR2	FGF	Secreted Signaling	PMC: 4393358
ClusterCA_neurons	ClusterNeuroblast	FGF9	FGFR2	0.0026696	0	FGF9_FGFR2	FGF9 - FGFR2	FGF	Secreted Signaling	PMC: 4393358
ClusterGABA_neurons	ClusterNeuroblast	FGF9	FGFR2	0.00684962	0	FGF9_FGFR2	FGF9 - FGFR2	FGF	Secreted Signaling	PMC: 4393358
ClusterImmature	ClusterNeuroblast	FGF9	FGFR2	0.00471048	0	FGF9_FGFR2	FGF9 - FGFR2	FGF	Secreted Signaling	PMC: 4393358
ClustermGC	ClusterNeuroblast	FGF9	FGFR2	0.00555462	0	FGF9_FGFR2	FGF9 - FGFR2	FGF	Secreted Signaling	PMC: 4393358
ClusterCA2-4_neurons	ClustermOli	FGF9	FGFR2	0.0070057	0	FGF9_FGFR2	FGF9 - FGFR2	FGF	Secreted Signaling	PMC: 4393358
ClusterCA_neurons	ClustermOli	FGF9	FGFR2	0.00380668	0	FGF9_FGFR2	FGF9 - FGFR2	FGF	Secreted Signaling	PMC: 4393358
ClusterGABA_neurons	ClustermOli	FGF9	FGFR2	0.0097497	0	FGF9_FGFR2	FGF9 - FGFR2	FGF	Secreted Signaling	PMC: 4393358
ClusterImmature	ClustermOli	FGF9	FGFR2	0.00671098	0	FGF9_FGFR2	FGF9 - FGFR2	FGF	Secreted Signaling	PMC: 4393358
ClustermGC	ClustermOli	FGF9	FGFR2	0.00791076	0	FGF9_FGFR2	FGF9 - FGFR2	FGF	Secreted Signaling	PMC: 4393358
ClusterCA2-4_neurons	ClusterAstrocytes	FGF9	FGFR3	0.00137029	0	FGF9_FGFR3	FGF9 - FGFR3	FGF	Secreted Signaling	PMC: 4393358
ClusterCA_neurons	ClusterAstrocytes	FGF9	FGFR3	0.000742646	0	FGF9_FGFR3	FGF9 - FGFR3	FGF	Secreted Signaling	PMC: 4393358
ClusterGABA_neurons	ClusterAstrocytes	FGF9	FGFR3	0.00191125	0	FGF9_FGFR3	FGF9 - FGFR3	FGF	Secreted Signaling	PMC: 4393358
ClusterImmature	ClusterAstrocytes	FGF9	FGFR3	0.00131233	0	FGF9_FGFR3	FGF9 - FGFR3	FGF	Secreted Signaling	PMC: 4393358
ClustermGC	ClusterAstrocytes	FGF9	FGFR3	0.00154845	0	FGF9_FGFR3	FGF9 - FGFR3	FGF	Secreted Signaling	PMC: 4393358
ClusterCA2-4_neurons	ClusterEpendymal	FGF9	FGFR3	0.000379849	0	FGF9_FGFR3	FGF9 - FGFR3	FGF	Secreted Signaling	PMC: 4393358
ClusterCA_neurons	ClusterEpendymal	FGF9	FGFR3	0.000205771	0	FGF9_FGFR3	FGF9 - FGFR3	FGF	Secreted Signaling	PMC: 4393358
ClusterGABA_neurons	ClusterEpendymal	FGF9	FGFR3	0.000530014	0	FGF9_FGFR3	FGF9 - FGFR3	FGF	Secreted Signaling	PMC: 4393358
ClusterImmature	ClusterEpendymal	FGF9	FGFR3	0.000363767	0	FGF9_FGFR3	FGF9 - FGFR3	FGF	Secreted Signaling	PMC: 4393358
ClustermGC	ClusterEpendymal	FGF9	FGFR3	0.000429292	0	FGF9_FGFR3	FGF9 - FGFR3	FGF	Secreted Signaling	PMC: 4393358
ClusterCA2-4_neurons	ClusterNeural Stem	FGF9	FGFR3	0.00110595	0	FGF9_FGFR3	FGF9 - FGFR3	FGF	Secreted Signaling	PMC: 4393358
ClusterCA_neurons	ClusterNeural Stem	FGF9	FGFR3	0.000599312	0	FGF9_FGFR3	FGF9 - FGFR3	FGF	Secreted Signaling	PMC: 4393358
ClusterGABA_neurons	ClusterNeural Stem	FGF9	FGFR3	0.00154272	0	FGF9_FGFR3	FGF9 - FGFR3	FGF	Secreted Signaling	PMC: 4393358
ClusterImmature	ClusterNeural Stem	FGF9	FGFR3	0.00105916	0	FGF9_FGFR3	FGF9 - FGFR3	FGF	Secreted Signaling	PMC: 4393358
ClustermGC	ClusterNeural Stem	FGF9	FGFR3	0.00124979	0	FGF9_FGFR3	FGF9 - FGFR3	FGF	Secreted Signaling	PMC: 4393358
ClusterEndothelial	ClusterOPCs	PDGFB	PDGFRA	0.0122178	0	PDGFB_PDGFRA	PDGFB - PDGFRA	PDGF	Secreted Signaling	PMID: 15207812
ClusterEndothelial	ClusterAstrocytes	PDGFB	PDGFRB	0.00132751	0	PDGFB_PDGFRB	PDGFB - PDGFRB	PDGF	Secreted Signaling	PMID: 15207812
ClusterEndothelial	ClusterEndothelial	PDGFB	PDGFRB	0.00196557	0	PDGFB_PDGFRB	PDGFB - PDGFRB	PDGF	Secreted Signaling	PMID: 15207812
ClusterEndothelial	ClusterEpendymal	PDGFB	PDGFRB	0.000432491	0	PDGFB_PDGFRB	PDGFB - PDGFRB	PDGF	Secreted Signaling	PMID: 15207812
ClusterEndothelial	ClusterNeural Stem	PDGFB	PDGFRB	0.00117617	0	PDGFB_PDGFRB	PDGFB - PDGFRB	PDGF	Secreted Signaling	PMID: 15207812
ClusterAstrocytes	ClusterOPCs	PDGFC	PDGFRA	0.0210439	0	PDGFC_PDGFRA	PDGFC - PDGFRA	PDGF	Secreted Signaling	PMID: 15207812
ClusterCA2-4_neurons	ClusterOPCs	PDGFC	PDGFRA	0.024882	0	PDGFC_PDGFRA	PDGFC - PDGFRA	PDGF	Secreted Signaling	PMID: 15207812
ClusterCA_neurons	ClusterOPCs	PDGFC	PDGFRA	0.0358532	0	PDGFC_PDGFRA	PDGFC - PDGFRA	PDGF	Secreted Signaling	PMID: 15207812
ClusterEndothelial	ClusterOPCs	PDGFC	PDGFRA	0.0123543	0	PDGFC_PDGFRA	PDGFC - PDGFRA	PDGF	Secreted Signaling	PMID: 15207812
ClusterEpendymal	ClusterOPCs	PDGFC	PDGFRA	0.0097723	0	PDGFC_PDGFRA	PDGFC - PDGFRA	PDGF	Secreted Signaling	PMID: 15207812
ClusterGABA_neurons	ClusterOPCs	PDGFC	PDGFRA	0.00972971	0	PDGFC_PDGFRA	PDGFC - PDGFRA	PDGF	Secreted Signaling	PMID: 15207812
ClusterImmature	ClusterOPCs	PDGFC	PDGFRA	0.023613	0	PDGFC_PDGFRA	PDGFC - PDGFRA	PDGF	Secreted Signaling	PMID: 15207812
ClusterMicroglia	ClusterOPCs	PDGFC	PDGFRA	0.0251944	0	PDGFC_PDGFRA	PDGFC - PDGFRA	PDGF	Secreted Signaling	PMID: 15207812
ClusterNeural Stem	ClusterOPCs	PDGFC	PDGFRA	0.0171601	0	PDGFC_PDGFRA	PDGFC - PDGFRA	PDGF	Secreted Signaling	PMID: 15207812
ClusterOPCs	ClusterOPCs	PDGFC	PDGFRA	0.0566648	0	PDGFC_PDGFRA	PDGFC - PDGFRA	PDGF	Secreted Signaling	PMID: 15207812
ClustermGC	ClusterOPCs	PDGFC	PDGFRA	0.0242624	0	PDGFC_PDGFRA	PDGFC - PDGFRA	PDGF	Secreted Signaling	PMID: 15207812
ClusterImmature	ClusterAstrocytes	PDGFD	PDGFRB	0.000652369	0	PDGFD_PDGFRB	PDGFD - PDGFRB	PDGF	Secreted Signaling	PMID: 15207812
ClusterImmature	ClusterEndothelial	PDGFD	PDGFRB	0.000966896	0	PDGFD_PDGFRB	PDGFD - PDGFRB	PDGF	Secreted Signaling	PMID: 15207812
ClusterImmature	ClusterEpendymal	PDGFD	PDGFRB	0.000212376	0	PDGFD_PDGFRB	PDGFD - PDGFRB	PDGF	Secreted Signaling	PMID: 15207812
ClusterImmature	ClusterNeural Stem	PDGFD	PDGFRB	0.000577912	0	PDGFD_PDGFRB	PDGFD - PDGFRB	PDGF	Secreted Signaling	PMID: 15207812
ClusterEpendymal	ClusterEndothelial	VEGFA	FLT1	0.00925303	0	VEGFA_VEGFR1	VEGFA - VEGFR1	VEGF	Secreted Signaling	KEGG: hsa04370; PMID: 16633338
ClusterEpendymal	ClusterEndothelial	VEGFB	FLT1	0.00799443	0	VEGFB_VEGFR1	VEGFB - VEGFR1	VEGF	Secreted Signaling	KEGG: hsa04370; PMID: 16633338
ClusterCA2-4_neurons	ClusterAstrocytes	IGF1	IGF1R	0.00196586	0	IGF1_IGF1R	IGF1 - IGF1R	IGF	Secreted Signaling	PMID: 14604834
ClusterGABA_neurons	ClusterAstrocytes	IGF1	IGF1R	0.020583	0	IGF1_IGF1R	IGF1 - IGF1R	IGF	Secreted Signaling	PMID: 14604834
ClusterCA2-4_neurons	ClusterCA2-4_neurons	IGF1	IGF1R	0.00215983	0	IGF1_IGF1R	IGF1 - IGF1R	IGF	Secreted Signaling	PMID: 14604834
ClusterGABA_neurons	ClusterCA2-4_neurons	IGF1	IGF1R	0.0225948	0	IGF1_IGF1R	IGF1 - IGF1R	IGF	Secreted Signaling	PMID: 14604834
ClusterCA2-4_neurons	ClusterCA_neurons	IGF1	IGF1R	0.00254081	0	IGF1_IGF1R	IGF1 - IGF1R	IGF	Secreted Signaling	PMID: 14604834
ClusterGABA_neurons	ClusterCA_neurons	IGF1	IGF1R	0.0264964	0	IGF1_IGF1R	IGF1 - IGF1R	IGF	Secreted Signaling	PMID: 14604834
ClusterCA2-4_neurons	ClusterEndothelial	IGF1	IGF1R	0.00339928	0	IGF1_IGF1R	IGF1 - IGF1R	IGF	Secreted Signaling	PMID: 14604834
ClusterGABA_neurons	ClusterEndothelial	IGF1	IGF1R	0.0351224	0	IGF1_IGF1R	IGF1 - IGF1R	IGF	Secreted Signaling	PMID: 14604834
ClusterCA2-4_neurons	ClusterEpendymal	IGF1	IGF1R	0.0030031	0	IGF1_IGF1R	IGF1 - IGF1R	IGF	Secreted Signaling	PMID: 14604834
ClusterGABA_neurons	ClusterEpendymal	IGF1	IGF1R	0.0310051	0	IGF1_IGF1R	IGF1 - IGF1R	IGF	Secreted Signaling	PMID: 14604834
ClusterCA2-4_neurons	ClusterGABA_neurons	IGF1	IGF1R	0.00238061	0	IGF1_IGF1R	IGF1 - IGF1R	IGF	Secreted Signaling	PMID: 14604834
ClusterGABA_neurons	ClusterGABA_neurons	IGF1	IGF1R	0.0248634	0	IGF1_IGF1R	IGF1 - IGF1R	IGF	Secreted Signaling	PMID: 14604834
ClusterCA2-4_neurons	ClusterImmature	IGF1	IGF1R	0.00210705	0	IGF1_IGF1R	IGF1 - IGF1R	IGF	Secreted Signaling	PMID: 14604834
ClusterGABA_neurons	ClusterImmature	IGF1	IGF1R	0.0220485	0	IGF1_IGF1R	IGF1 - IGF1R	IGF	Secreted Signaling	PMID: 14604834
ClusterCA2-4_neurons	ClusterNeural Stem	IGF1	IGF1R	0.00209229	0	IGF1_IGF1R	IGF1 - IGF1R	IGF	Secreted Signaling	PMID: 14604834
ClusterGABA_neurons	ClusterNeural Stem	IGF1	IGF1R	0.0219118	0	IGF1_IGF1R	IGF1 - IGF1R	IGF	Secreted Signaling	PMID: 14604834
ClusterCA2-4_neurons	ClusterNeuroblast	IGF1	IGF1R	0.00158074	0	IGF1_IGF1R	IGF1 - IGF1R	IGF	Secreted Signaling	PMID: 14604834
ClusterGABA_neurons	ClusterNeuroblast	IGF1	IGF1R	0.0166351	0	IGF1_IGF1R	IGF1 - IGF1R	IGF	Secreted Signaling	PMID: 14604834
ClusterCA2-4_neurons	ClusterOPCs	IGF1	IGF1R	0.00223108	0	IGF1_IGF1R	IGF1 - IGF1R	IGF	Secreted Signaling	PMID: 14604834
ClusterGABA_neurons	ClusterOPCs	IGF1	IGF1R	0.0233346	0	IGF1_IGF1R	IGF1 - IGF1R	IGF	Secreted Signaling	PMID: 14604834
ClusterCA2-4_neurons	ClustermGC	IGF1	IGF1R	0.00212805	0	IGF1_IGF1R	IGF1 - IGF1R	IGF	Secreted Signaling	PMID: 14604834
ClusterGABA_neurons	ClustermGC	IGF1	IGF1R	0.022271	0	IGF1_IGF1R	IGF1 - IGF1R	IGF	Secreted Signaling	PMID: 14604834
ClusterCA2-4_neurons	ClustermOli	IGF1	IGF1R	0.000889292	0	IGF1_IGF1R	IGF1 - IGF1R	IGF	Secreted Signaling	PMID: 14604834
ClusterGABA_neurons	ClustermOli	IGF1	IGF1R	0.00942059	0	IGF1_IGF1R	IGF1 - IGF1R	IGF	Secreted Signaling	PMID: 14604834
ClusterCA2-4_neurons	ClusterAstrocytes	IGF1	ITGA6_ITGB4	0.000645659	0	IGF1_ITGA6_ITGB4	IGF1 - (ITGA6+ITGB4)	IGF	Secreted Signaling	PMID: 28190785; PMID: 28873464
ClusterGABA_neurons	ClusterAstrocytes	IGF1	ITGA6_ITGB4	0.00685243	0	IGF1_ITGA6_ITGB4	IGF1 - (ITGA6+ITGB4)	IGF	Secreted Signaling	PMID: 28190785; PMID: 28873464
ClusterCA2-4_neurons	ClusterEpendymal	IGF1	ITGA6_ITGB4	0.000725131	0	IGF1_ITGA6_ITGB4	IGF1 - (ITGA6+ITGB4)	IGF	Secreted Signaling	PMID: 28190785; PMID: 28873464
ClusterGABA_neurons	ClusterEpendymal	IGF1	ITGA6_ITGB4	0.00768289	0	IGF1_ITGA6_ITGB4	IGF1 - (ITGA6+ITGB4)	IGF	Secreted Signaling	PMID: 28190785; PMID: 28873464
ClusterCA2-4_neurons	ClusterNeural Stem	IGF1	ITGA6_ITGB4	0.00095695	0	IGF1_ITGA6_ITGB4	IGF1 - (ITGA6+ITGB4)	IGF	Secreted Signaling	PMID: 28190785; PMID: 28873464
ClusterGABA_neurons	ClusterNeural Stem	IGF1	ITGA6_ITGB4	0.0101307	0	IGF1_ITGA6_ITGB4	IGF1 - (ITGA6+ITGB4)	IGF	Secreted Signaling	PMID: 28190785; PMID: 28873464
ClusterAstrocytes	ClusterEndothelial	MIF	CD74_CD44	0.00202243	0	MIF_CD74_CD44	MIF - (CD74+CD44)	MIF	Secreted Signaling	PMID: 29637711; PMID: 26175090
ClusterCA2-4_neurons	ClusterEndothelial	MIF	CD74_CD44	0.00326826	0	MIF_CD74_CD44	MIF - (CD74+CD44)	MIF	Secreted Signaling	PMID: 29637711; PMID: 26175090
ClusterCA_neurons	ClusterEndothelial	MIF	CD74_CD44	0.00114471	0	MIF_CD74_CD44	MIF - (CD74+CD44)	MIF	Secreted Signaling	PMID: 29637711; PMID: 26175090
ClusterEndothelial	ClusterEndothelial	MIF	CD74_CD44	0.00662379	0	MIF_CD74_CD44	MIF - (CD74+CD44)	MIF	Secreted Signaling	PMID: 29637711; PMID: 26175090
ClusterEpendymal	ClusterEndothelial	MIF	CD74_CD44	0.00544884	0	MIF_CD74_CD44	MIF - (CD74+CD44)	MIF	Secreted Signaling	PMID: 29637711; PMID: 26175090
ClusterGABA_neurons	ClusterEndothelial	MIF	CD74_CD44	0.00127182	0	MIF_CD74_CD44	MIF - (CD74+CD44)	MIF	Secreted Signaling	PMID: 29637711; PMID: 26175090
ClusterImmature	ClusterEndothelial	MIF	CD74_CD44	0.00361481	0	MIF_CD74_CD44	MIF - (CD74+CD44)	MIF	Secreted Signaling	PMID: 29637711; PMID: 26175090
ClusterNeuroblast	ClusterEndothelial	MIF	CD74_CD44	0.0071584	0	MIF_CD74_CD44	MIF - (CD74+CD44)	MIF	Secreted Signaling	PMID: 29637711; PMID: 26175090
ClustermGC	ClusterEndothelial	MIF	CD74_CD44	0.001323	0	MIF_CD74_CD44	MIF - (CD74+CD44)	MIF	Secreted Signaling	PMID: 29637711; PMID: 26175090
ClusterAstrocytes	ClusterEpendymal	MIF	CD74_CD44	0.00213602	0	MIF_CD74_CD44	MIF - (CD74+CD44)	MIF	Secreted Signaling	PMID: 29637711; PMID: 26175090
ClusterCA2-4_neurons	ClusterEpendymal	MIF	CD74_CD44	0.00345159	0	MIF_CD74_CD44	MIF - (CD74+CD44)	MIF	Secreted Signaling	PMID: 29637711; PMID: 26175090
ClusterCA_neurons	ClusterEpendymal	MIF	CD74_CD44	0.00120906	0	MIF_CD74_CD44	MIF - (CD74+CD44)	MIF	Secreted Signaling	PMID: 29637711; PMID: 26175090
ClusterEndothelial	ClusterEpendymal	MIF	CD74_CD44	0.00699402	0	MIF_CD74_CD44	MIF - (CD74+CD44)	MIF	Secreted Signaling	PMID: 29637711; PMID: 26175090
ClusterEpendymal	ClusterEpendymal	MIF	CD74_CD44	0.00575377	0	MIF_CD74_CD44	MIF - (CD74+CD44)	MIF	Secreted Signaling	PMID: 29637711; PMID: 26175090
ClusterGABA_neurons	ClusterEpendymal	MIF	CD74_CD44	0.00134331	0	MIF_CD74_CD44	MIF - (CD74+CD44)	MIF	Secreted Signaling	PMID: 29637711; PMID: 26175090
ClusterImmature	ClusterEpendymal	MIF	CD74_CD44	0.0038175	0	MIF_CD74_CD44	MIF - (CD74+CD44)	MIF	Secreted Signaling	PMID: 29637711; PMID: 26175090
ClusterNeuroblast	ClusterEpendymal	MIF	CD74_CD44	0.00755828	0	MIF_CD74_CD44	MIF - (CD74+CD44)	MIF	Secreted Signaling	PMID: 29637711; PMID: 26175090
ClustermGC	ClusterEpendymal	MIF	CD74_CD44	0.00139736	0	MIF_CD74_CD44	MIF - (CD74+CD44)	MIF	Secreted Signaling	PMID: 29637711; PMID: 26175090
ClusterCA_neurons	ClusterMicroglia	CX3CL1	CX3CR1	0.000690957	0	CX3CL1_CX3CR1	CX3CL1 - CX3CR1	CX3C	Secreted Signaling	KEGG: hsa04060
ClusterImmature	ClusterMicroglia	CX3CL1	CX3CR1	0.00162696	0	CX3CL1_CX3CR1	CX3CL1 - CX3CR1	CX3C	Secreted Signaling	KEGG: hsa04060
ClusterCA2-4_neurons	ClusterMicroglia	IL34	CSF1R	0.00381847	0	IL34_CSF1R	IL34 - CSF1R	CSF	Secreted Signaling	KEGG: hsa04060
ClusterImmature	ClusterMicroglia	IL34	CSF1R	0.00519762	0	IL34_CSF1R	IL34 - CSF1R	CSF	Secreted Signaling	KEGG: hsa04060
ClustermGC	ClusterMicroglia	IL34	CSF1R	0.00458231	0	IL34_CSF1R	IL34 - CSF1R	CSF	Secreted Signaling	KEGG: hsa04060
ClusterEndothelial	ClusterAstrocytes	SPP1	CD44	0.00602585	0	SPP1_CD44	SPP1 - CD44	SPP1	Secreted Signaling	PMID: 21907263
ClusterEpendymal	ClusterAstrocytes	SPP1	CD44	0.0106277	0	SPP1_CD44	SPP1 - CD44	SPP1	Secreted Signaling	PMID: 21907263
ClusterMicroglia	ClusterAstrocytes	SPP1	CD44	0.0986558	0	SPP1_CD44	SPP1 - CD44	SPP1	Secreted Signaling	PMID: 21907263
ClusterNeural Stem	ClusterAstrocytes	SPP1	CD44	0.00111684	0	SPP1_CD44	SPP1 - CD44	SPP1	Secreted Signaling	PMID: 21907263
ClusterNeuroblast	ClusterAstrocytes	SPP1	CD44	0.0562172	0	SPP1_CD44	SPP1 - CD44	SPP1	Secreted Signaling	PMID: 21907263
ClustermOli	ClusterAstrocytes	SPP1	CD44	0.0530205	0	SPP1_CD44	SPP1 - CD44	SPP1	Secreted Signaling	PMID: 21907263
ClusterEndothelial	ClusterEndothelial	SPP1	CD44	0.00111135	0	SPP1_CD44	SPP1 - CD44	SPP1	Secreted Signaling	PMID: 21907263
ClusterEpendymal	ClusterEndothelial	SPP1	CD44	0.00196749	0	SPP1_CD44	SPP1 - CD44	SPP1	Secreted Signaling	PMID: 21907263
ClusterMicroglia	ClusterEndothelial	SPP1	CD44	0.0196917	0	SPP1_CD44	SPP1 - CD44	SPP1	Secreted Signaling	PMID: 21907263
ClusterNeural Stem	ClusterEndothelial	SPP1	CD44	0.000205152	0	SPP1_CD44	SPP1 - CD44	SPP1	Secreted Signaling	PMID: 21907263
ClusterNeuroblast	ClusterEndothelial	SPP1	CD44	0.0108135	0	SPP1_CD44	SPP1 - CD44	SPP1	Secreted Signaling	PMID: 21907263
ClustermOli	ClusterEndothelial	SPP1	CD44	0.0101707	0	SPP1_CD44	SPP1 - CD44	SPP1	Secreted Signaling	PMID: 21907263
ClusterEndothelial	ClusterEpendymal	SPP1	CD44	0.00193575	0	SPP1_CD44	SPP1 - CD44	SPP1	Secreted Signaling	PMID: 21907263
ClusterEpendymal	ClusterEpendymal	SPP1	CD44	0.00342481	0	SPP1_CD44	SPP1 - CD44	SPP1	Secreted Signaling	PMID: 21907263
ClusterMicroglia	ClusterEpendymal	SPP1	CD44	0.0338324	0	SPP1_CD44	SPP1 - CD44	SPP1	Secreted Signaling	PMID: 21907263
ClusterNeural Stem	ClusterEpendymal	SPP1	CD44	0.000357575	0	SPP1_CD44	SPP1 - CD44	SPP1	Secreted Signaling	PMID: 21907263
ClusterNeuroblast	ClusterEpendymal	SPP1	CD44	0.0187002	0	SPP1_CD44	SPP1 - CD44	SPP1	Secreted Signaling	PMID: 21907263
ClustermOli	ClusterEpendymal	SPP1	CD44	0.0175971	0	SPP1_CD44	SPP1 - CD44	SPP1	Secreted Signaling	PMID: 21907263
ClusterEndothelial	ClusterNeural Stem	SPP1	CD44	0.0103079	0	SPP1_CD44	SPP1 - CD44	SPP1	Secreted Signaling	PMID: 21907263
ClusterEpendymal	ClusterNeural Stem	SPP1	CD44	0.0181202	0	SPP1_CD44	SPP1 - CD44	SPP1	Secreted Signaling	PMID: 21907263
ClusterMicroglia	ClusterNeural Stem	SPP1	CD44	0.15828	0	SPP1_CD44	SPP1 - CD44	SPP1	Secreted Signaling	PMID: 21907263
ClusterNeural Stem	ClusterNeural Stem	SPP1	CD44	0.0019172	0	SPP1_CD44	SPP1 - CD44	SPP1	Secreted Signaling	PMID: 21907263
ClusterNeuroblast	ClusterNeural Stem	SPP1	CD44	0.0928347	0	SPP1_CD44	SPP1 - CD44	SPP1	Secreted Signaling	PMID: 21907263
ClustermOli	ClusterNeural Stem	SPP1	CD44	0.0877495	0	SPP1_CD44	SPP1 - CD44	SPP1	Secreted Signaling	PMID: 21907263
ClusterMicroglia	ClusterAstrocytes	SPP1	ITGAV_ITGB1	0.0217321	0	SPP1_ITGAV_ITGB1	SPP1 - (ITGAV+ITGB1)	SPP1	Secreted Signaling	PMID: 21907263
ClusterNeuroblast	ClusterAstrocytes	SPP1	ITGAV_ITGB1	0.0119451	0	SPP1_ITGAV_ITGB1	SPP1 - (ITGAV+ITGB1)	SPP1	Secreted Signaling	PMID: 21907263
ClustermOli	ClusterAstrocytes	SPP1	ITGAV_ITGB1	0.0112359	0	SPP1_ITGAV_ITGB1	SPP1 - (ITGAV+ITGB1)	SPP1	Secreted Signaling	PMID: 21907263
ClusterMicroglia	ClusterCA2-4_neurons	SPP1	ITGAV_ITGB1	0.0336514	0	SPP1_ITGAV_ITGB1	SPP1 - (ITGAV+ITGB1)	SPP1	Secreted Signaling	PMID: 21907263
ClusterNeuroblast	ClusterCA2-4_neurons	SPP1	ITGAV_ITGB1	0.0185987	0	SPP1_ITGAV_ITGB1	SPP1 - (ITGAV+ITGB1)	SPP1	Secreted Signaling	PMID: 21907263
ClustermOli	ClusterCA2-4_neurons	SPP1	ITGAV_ITGB1	0.0175014	0	SPP1_ITGAV_ITGB1	SPP1 - (ITGAV+ITGB1)	SPP1	Secreted Signaling	PMID: 21907263
ClusterMicroglia	ClusterCA_neurons	SPP1	ITGAV_ITGB1	0.0143198	0	SPP1_ITGAV_ITGB1	SPP1 - (ITGAV+ITGB1)	SPP1	Secreted Signaling	PMID: 21907263
ClusterNeuroblast	ClusterCA_neurons	SPP1	ITGAV_ITGB1	0.00784413	0	SPP1_ITGAV_ITGB1	SPP1 - (ITGAV+ITGB1)	SPP1	Secreted Signaling	PMID: 21907263
ClustermOli	ClusterCA_neurons	SPP1	ITGAV_ITGB1	0.00737659	0	SPP1_ITGAV_ITGB1	SPP1 - (ITGAV+ITGB1)	SPP1	Secreted Signaling	PMID: 21907263
ClusterEndothelial	ClusterEndothelial	SPP1	ITGAV_ITGB1	0.0070326	0	SPP1_ITGAV_ITGB1	SPP1 - (ITGAV+ITGB1)	SPP1	Secreted Signaling	PMID: 21907263
ClusterEpendymal	ClusterEndothelial	SPP1	ITGAV_ITGB1	0.0123936	0	SPP1_ITGAV_ITGB1	SPP1 - (ITGAV+ITGB1)	SPP1	Secreted Signaling	PMID: 21907263
ClusterMicroglia	ClusterEndothelial	SPP1	ITGAV_ITGB1	0.113373	0	SPP1_ITGAV_ITGB1	SPP1 - (ITGAV+ITGB1)	SPP1	Secreted Signaling	PMID: 21907263
ClusterNeuroblast	ClusterEndothelial	SPP1	ITGAV_ITGB1	0.0650605	0	SPP1_ITGAV_ITGB1	SPP1 - (ITGAV+ITGB1)	SPP1	Secreted Signaling	PMID: 21907263
ClustermOli	ClusterEndothelial	SPP1	ITGAV_ITGB1	0.0613937	0	SPP1_ITGAV_ITGB1	SPP1 - (ITGAV+ITGB1)	SPP1	Secreted Signaling	PMID: 21907263
ClusterEpendymal	ClusterEpendymal	SPP1	ITGAV_ITGB1	0.00549653	0	SPP1_ITGAV_ITGB1	SPP1 - (ITGAV+ITGB1)	SPP1	Secreted Signaling	PMID: 21907263
ClusterMicroglia	ClusterEpendymal	SPP1	ITGAV_ITGB1	0.0533141	0	SPP1_ITGAV_ITGB1	SPP1 - (ITGAV+ITGB1)	SPP1	Secreted Signaling	PMID: 21907263
ClusterNeuroblast	ClusterEpendymal	SPP1	ITGAV_ITGB1	0.0297366	0	SPP1_ITGAV_ITGB1	SPP1 - (ITGAV+ITGB1)	SPP1	Secreted Signaling	PMID: 21907263
ClustermOli	ClusterEpendymal	SPP1	ITGAV_ITGB1	0.028001	0	SPP1_ITGAV_ITGB1	SPP1 - (ITGAV+ITGB1)	SPP1	Secreted Signaling	PMID: 21907263
ClusterMicroglia	ClusterGABA_neurons	SPP1	ITGAV_ITGB1	0.0155929	0	SPP1_ITGAV_ITGB1	SPP1 - (ITGAV+ITGB1)	SPP1	Secreted Signaling	PMID: 21907263
ClusterNeuroblast	ClusterGABA_neurons	SPP1	ITGAV_ITGB1	0.00854655	0	SPP1_ITGAV_ITGB1	SPP1 - (ITGAV+ITGB1)	SPP1	Secreted Signaling	PMID: 21907263
ClustermOli	ClusterGABA_neurons	SPP1	ITGAV_ITGB1	0.00803748	0	SPP1_ITGAV_ITGB1	SPP1 - (ITGAV+ITGB1)	SPP1	Secreted Signaling	PMID: 21907263
ClusterMicroglia	ClusterImmature	SPP1	ITGAV_ITGB1	0.040673	0	SPP1_ITGAV_ITGB1	SPP1 - (ITGAV+ITGB1)	SPP1	Secreted Signaling	PMID: 21907263
ClusterNeuroblast	ClusterImmature	SPP1	ITGAV_ITGB1	0.0225527	0	SPP1_ITGAV_ITGB1	SPP1 - (ITGAV+ITGB1)	SPP1	Secreted Signaling	PMID: 21907263
ClustermOli	ClusterImmature	SPP1	ITGAV_ITGB1	0.0212272	0	SPP1_ITGAV_ITGB1	SPP1 - (ITGAV+ITGB1)	SPP1	Secreted Signaling	PMID: 21907263
ClusterEpendymal	ClusterMicroglia	SPP1	ITGAV_ITGB1	0.00572879	0	SPP1_ITGAV_ITGB1	SPP1 - (ITGAV+ITGB1)	SPP1	Secreted Signaling	PMID: 21907263
ClusterMicroglia	ClusterMicroglia	SPP1	ITGAV_ITGB1	0.0554543	0	SPP1_ITGAV_ITGB1	SPP1 - (ITGAV+ITGB1)	SPP1	Secreted Signaling	PMID: 21907263
ClusterNeuroblast	ClusterMicroglia	SPP1	ITGAV_ITGB1	0.0309612	0	SPP1_ITGAV_ITGB1	SPP1 - (ITGAV+ITGB1)	SPP1	Secreted Signaling	PMID: 21907263
ClustermOli	ClusterMicroglia	SPP1	ITGAV_ITGB1	0.0291563	0	SPP1_ITGAV_ITGB1	SPP1 - (ITGAV+ITGB1)	SPP1	Secreted Signaling	PMID: 21907263
ClusterMicroglia	ClusterNeural Stem	SPP1	ITGAV_ITGB1	0.0297416	0	SPP1_ITGAV_ITGB1	SPP1 - (ITGAV+ITGB1)	SPP1	Secreted Signaling	PMID: 21907263
ClusterNeuroblast	ClusterNeural Stem	SPP1	ITGAV_ITGB1	0.016408	0	SPP1_ITGAV_ITGB1	SPP1 - (ITGAV+ITGB1)	SPP1	Secreted Signaling	PMID: 21907263
ClustermOli	ClusterNeural Stem	SPP1	ITGAV_ITGB1	0.015438	0	SPP1_ITGAV_ITGB1	SPP1 - (ITGAV+ITGB1)	SPP1	Secreted Signaling	PMID: 21907263
ClusterMicroglia	ClusterNeuroblast	SPP1	ITGAV_ITGB1	0.0282036	0	SPP1_ITGAV_ITGB1	SPP1 - (ITGAV+ITGB1)	SPP1	Secreted Signaling	PMID: 21907263
ClusterNeuroblast	ClusterNeuroblast	SPP1	ITGAV_ITGB1	0.0155485	0	SPP1_ITGAV_ITGB1	SPP1 - (ITGAV+ITGB1)	SPP1	Secreted Signaling	PMID: 21907263
ClustermOli	ClusterNeuroblast	SPP1	ITGAV_ITGB1	0.0146285	0	SPP1_ITGAV_ITGB1	SPP1 - (ITGAV+ITGB1)	SPP1	Secreted Signaling	PMID: 21907263
ClusterEpendymal	ClusterOPCs	SPP1	ITGAV_ITGB1	0.00468901	0	SPP1_ITGAV_ITGB1	SPP1 - (ITGAV+ITGB1)	SPP1	Secreted Signaling	PMID: 21907263
ClusterMicroglia	ClusterOPCs	SPP1	ITGAV_ITGB1	0.045805	0	SPP1_ITGAV_ITGB1	SPP1 - (ITGAV+ITGB1)	SPP1	Secreted Signaling	PMID: 21907263
ClusterNeuroblast	ClusterOPCs	SPP1	ITGAV_ITGB1	0.025459	0	SPP1_ITGAV_ITGB1	SPP1 - (ITGAV+ITGB1)	SPP1	Secreted Signaling	PMID: 21907263
ClustermOli	ClusterOPCs	SPP1	ITGAV_ITGB1	0.0239669	0	SPP1_ITGAV_ITGB1	SPP1 - (ITGAV+ITGB1)	SPP1	Secreted Signaling	PMID: 21907263
ClusterEpendymal	ClustermGC	SPP1	ITGAV_ITGB1	0.00435622	0	SPP1_ITGAV_ITGB1	SPP1 - (ITGAV+ITGB1)	SPP1	Secreted Signaling	PMID: 21907263
ClusterMicroglia	ClustermGC	SPP1	ITGAV_ITGB1	0.0426793	0	SPP1_ITGAV_ITGB1	SPP1 - (ITGAV+ITGB1)	SPP1	Secreted Signaling	PMID: 21907263
ClusterNeuroblast	ClustermGC	SPP1	ITGAV_ITGB1	0.0236872	0	SPP1_ITGAV_ITGB1	SPP1 - (ITGAV+ITGB1)	SPP1	Secreted Signaling	PMID: 21907263
ClustermOli	ClustermGC	SPP1	ITGAV_ITGB1	0.0222966	0	SPP1_ITGAV_ITGB1	SPP1 - (ITGAV+ITGB1)	SPP1	Secreted Signaling	PMID: 21907263
ClusterMicroglia	ClustermOli	SPP1	ITGAV_ITGB1	0.0288477	0	SPP1_ITGAV_ITGB1	SPP1 - (ITGAV+ITGB1)	SPP1	Secreted Signaling	PMID: 21907263
ClusterNeuroblast	ClustermOli	SPP1	ITGAV_ITGB1	0.0159083	0	SPP1_ITGAV_ITGB1	SPP1 - (ITGAV+ITGB1)	SPP1	Secreted Signaling	PMID: 21907263
ClustermOli	ClustermOli	SPP1	ITGAV_ITGB1	0.0149674	0	SPP1_ITGAV_ITGB1	SPP1 - (ITGAV+ITGB1)	SPP1	Secreted Signaling	PMID: 21907263
ClusterEndothelial	ClusterAstrocytes	SPP1	ITGAV_ITGB5	0.00163958	0	SPP1_ITGAV_ITGB5	SPP1 - (ITGAV+ITGB5)	SPP1	Secreted Signaling	PMID: 21907263
ClusterEpendymal	ClusterAstrocytes	SPP1	ITGAV_ITGB5	0.00290146	0	SPP1_ITGAV_ITGB5	SPP1 - (ITGAV+ITGB5)	SPP1	Secreted Signaling	PMID: 21907263
ClusterMicroglia	ClusterAstrocytes	SPP1	ITGAV_ITGB5	0.0287967	0	SPP1_ITGAV_ITGB5	SPP1 - (ITGAV+ITGB5)	SPP1	Secreted Signaling	PMID: 21907263
ClusterNeural Stem	ClusterAstrocytes	SPP1	ITGAV_ITGB5	0.000302792	0	SPP1_ITGAV_ITGB5	SPP1 - (ITGAV+ITGB5)	SPP1	Secreted Signaling	PMID: 21907263
ClusterNeuroblast	ClusterAstrocytes	SPP1	ITGAV_ITGB5	0.0158798	0	SPP1_ITGAV_ITGB5	SPP1 - (ITGAV+ITGB5)	SPP1	Secreted Signaling	PMID: 21907263
ClustermOli	ClusterAstrocytes	SPP1	ITGAV_ITGB5	0.0149406	0	SPP1_ITGAV_ITGB5	SPP1 - (ITGAV+ITGB5)	SPP1	Secreted Signaling	PMID: 21907263
ClusterEndothelial	ClusterEndothelial	SPP1	ITGAV_ITGB5	0.00275305	0	SPP1_ITGAV_ITGB5	SPP1 - (ITGAV+ITGB5)	SPP1	Secreted Signaling	PMID: 21907263
ClusterEpendymal	ClusterEndothelial	SPP1	ITGAV_ITGB5	0.00486774	0	SPP1_ITGAV_ITGB5	SPP1 - (ITGAV+ITGB5)	SPP1	Secreted Signaling	PMID: 21907263
ClusterMicroglia	ClusterEndothelial	SPP1	ITGAV_ITGB5	0.0474762	0	SPP1_ITGAV_ITGB5	SPP1 - (ITGAV+ITGB5)	SPP1	Secreted Signaling	PMID: 21907263
ClusterNeural Stem	ClusterEndothelial	SPP1	ITGAV_ITGB5	0.000508888	0	SPP1_ITGAV_ITGB5	SPP1 - (ITGAV+ITGB5)	SPP1	Secreted Signaling	PMID: 21907263
ClusterNeuroblast	ClusterEndothelial	SPP1	ITGAV_ITGB5	0.0264084	0	SPP1_ITGAV_ITGB5	SPP1 - (ITGAV+ITGB5)	SPP1	Secreted Signaling	PMID: 21907263
ClustermOli	ClusterEndothelial	SPP1	ITGAV_ITGB5	0.0248621	0	SPP1_ITGAV_ITGB5	SPP1 - (ITGAV+ITGB5)	SPP1	Secreted Signaling	PMID: 21907263
ClusterEndothelial	ClusterEpendymal	SPP1	ITGAV_ITGB5	0.00327515	0	SPP1_ITGAV_ITGB5	SPP1 - (ITGAV+ITGB5)	SPP1	Secreted Signaling	PMID: 21907263
ClusterEpendymal	ClusterEpendymal	SPP1	ITGAV_ITGB5	0.00578854	0	SPP1_ITGAV_ITGB5	SPP1 - (ITGAV+ITGB5)	SPP1	Secreted Signaling	PMID: 21907263
ClusterMicroglia	ClusterEpendymal	SPP1	ITGAV_ITGB5	0.0560034	0	SPP1_ITGAV_ITGB5	SPP1 - (ITGAV+ITGB5)	SPP1	Secreted Signaling	PMID: 21907263
ClusterNeural Stem	ClusterEpendymal	SPP1	ITGAV_ITGB5	0.000605652	0	SPP1_ITGAV_ITGB5	SPP1 - (ITGAV+ITGB5)	SPP1	Secreted Signaling	PMID: 21907263
ClusterNeuroblast	ClusterEpendymal	SPP1	ITGAV_ITGB5	0.0312758	0	SPP1_ITGAV_ITGB5	SPP1 - (ITGAV+ITGB5)	SPP1	Secreted Signaling	PMID: 21907263
ClustermOli	ClusterEpendymal	SPP1	ITGAV_ITGB5	0.0294531	0	SPP1_ITGAV_ITGB5	SPP1 - (ITGAV+ITGB5)	SPP1	Secreted Signaling	PMID: 21907263
ClusterEndothelial	ClusterImmature	SPP1	ITGAV_ITGB5	0.00137981	0	SPP1_ITGAV_ITGB5	SPP1 - (ITGAV+ITGB5)	SPP1	Secreted Signaling	PMID: 21907263
ClusterEpendymal	ClusterImmature	SPP1	ITGAV_ITGB5	0.00244226	0	SPP1_ITGAV_ITGB5	SPP1 - (ITGAV+ITGB5)	SPP1	Secreted Signaling	PMID: 21907263
ClusterMicroglia	ClusterImmature	SPP1	ITGAV_ITGB5	0.0243392	0	SPP1_ITGAV_ITGB5	SPP1 - (ITGAV+ITGB5)	SPP1	Secreted Signaling	PMID: 21907263
ClusterNeural Stem	ClusterImmature	SPP1	ITGAV_ITGB5	0.000254765	0	SPP1_ITGAV_ITGB5	SPP1 - (ITGAV+ITGB5)	SPP1	Secreted Signaling	PMID: 21907263
ClusterNeuroblast	ClusterImmature	SPP1	ITGAV_ITGB5	0.0133942	0	SPP1_ITGAV_ITGB5	SPP1 - (ITGAV+ITGB5)	SPP1	Secreted Signaling	PMID: 21907263
ClustermOli	ClusterImmature	SPP1	ITGAV_ITGB5	0.0126	0	SPP1_ITGAV_ITGB5	SPP1 - (ITGAV+ITGB5)	SPP1	Secreted Signaling	PMID: 21907263
ClusterEndothelial	ClusterNeural Stem	SPP1	ITGAV_ITGB5	0.00157935	0	SPP1_ITGAV_ITGB5	SPP1 - (ITGAV+ITGB5)	SPP1	Secreted Signaling	PMID: 21907263
ClusterEpendymal	ClusterNeural Stem	SPP1	ITGAV_ITGB5	0.00279501	0	SPP1_ITGAV_ITGB5	SPP1 - (ITGAV+ITGB5)	SPP1	Secreted Signaling	PMID: 21907263
ClusterMicroglia	ClusterNeural Stem	SPP1	ITGAV_ITGB5	0.0277666	0	SPP1_ITGAV_ITGB5	SPP1 - (ITGAV+ITGB5)	SPP1	Secreted Signaling	PMID: 21907263
ClusterNeural Stem	ClusterNeural Stem	SPP1	ITGAV_ITGB5	0.000291654	0	SPP1_ITGAV_ITGB5	SPP1 - (ITGAV+ITGB5)	SPP1	Secreted Signaling	PMID: 21907263
ClusterNeuroblast	ClusterNeural Stem	SPP1	ITGAV_ITGB5	0.0153045	0	SPP1_ITGAV_ITGB5	SPP1 - (ITGAV+ITGB5)	SPP1	Secreted Signaling	PMID: 21907263
ClustermOli	ClusterNeural Stem	SPP1	ITGAV_ITGB5	0.0143988	0	SPP1_ITGAV_ITGB5	SPP1 - (ITGAV+ITGB5)	SPP1	Secreted Signaling	PMID: 21907263
ClusterEndothelial	ClustermGC	SPP1	ITGAV_ITGB5	0.00148031	0	SPP1_ITGAV_ITGB5	SPP1 - (ITGAV+ITGB5)	SPP1	Secreted Signaling	PMID: 21907263
ClusterEpendymal	ClustermGC	SPP1	ITGAV_ITGB5	0.00261994	0	SPP1_ITGAV_ITGB5	SPP1 - (ITGAV+ITGB5)	SPP1	Secreted Signaling	PMID: 21907263
ClusterMicroglia	ClustermGC	SPP1	ITGAV_ITGB5	0.0260683	0	SPP1_ITGAV_ITGB5	SPP1 - (ITGAV+ITGB5)	SPP1	Secreted Signaling	PMID: 21907263
ClusterNeural Stem	ClustermGC	SPP1	ITGAV_ITGB5	0.000273343	0	SPP1_ITGAV_ITGB5	SPP1 - (ITGAV+ITGB5)	SPP1	Secreted Signaling	PMID: 21907263
ClusterNeuroblast	ClustermGC	SPP1	ITGAV_ITGB5	0.0143572	0	SPP1_ITGAV_ITGB5	SPP1 - (ITGAV+ITGB5)	SPP1	Secreted Signaling	PMID: 21907263
ClustermOli	ClustermGC	SPP1	ITGAV_ITGB5	0.0135067	0	SPP1_ITGAV_ITGB5	SPP1 - (ITGAV+ITGB5)	SPP1	Secreted Signaling	PMID: 21907263
ClusterEndothelial	ClusterCA2-4_neurons	SPP1	ITGA4_ITGB1	0.00277475	0	SPP1_ITGA4_ITGB1	SPP1 - (ITGA4+ITGB1)	SPP1	Secreted Signaling	PMID: 21907263
ClusterEpendymal	ClusterCA2-4_neurons	SPP1	ITGA4_ITGB1	0.00490603	0	SPP1_ITGA4_ITGB1	SPP1 - (ITGA4+ITGB1)	SPP1	Secreted Signaling	PMID: 21907263
ClusterMicroglia	ClusterCA2-4_neurons	SPP1	ITGA4_ITGB1	0.0478335	0	SPP1_ITGA4_ITGB1	SPP1 - (ITGA4+ITGB1)	SPP1	Secreted Signaling	PMID: 21907263
ClusterNeural Stem	ClusterCA2-4_neurons	SPP1	ITGA4_ITGB1	0.000512908	0	SPP1_ITGA4_ITGB1	SPP1 - (ITGA4+ITGB1)	SPP1	Secreted Signaling	PMID: 21907263
ClusterNeuroblast	ClusterCA2-4_neurons	SPP1	ITGA4_ITGB1	0.0266116	0	SPP1_ITGA4_ITGB1	SPP1 - (ITGA4+ITGB1)	SPP1	Secreted Signaling	PMID: 21907263
ClustermOli	ClusterCA2-4_neurons	SPP1	ITGA4_ITGB1	0.0250537	0	SPP1_ITGA4_ITGB1	SPP1 - (ITGA4+ITGB1)	SPP1	Secreted Signaling	PMID: 21907263
ClusterEndothelial	ClusterCA_neurons	SPP1	ITGA4_ITGB1	0.000310592	0	SPP1_ITGA4_ITGB1	SPP1 - (ITGA4+ITGB1)	SPP1	Secreted Signaling	PMID: 21907263
ClusterEpendymal	ClusterCA_neurons	SPP1	ITGA4_ITGB1	0.0005502	0	SPP1_ITGA4_ITGB1	SPP1 - (ITGA4+ITGB1)	SPP1	Secreted Signaling	PMID: 21907263
ClusterMicroglia	ClusterCA_neurons	SPP1	ITGA4_ITGB1	0.00557807	0	SPP1_ITGA4_ITGB1	SPP1 - (ITGA4+ITGB1)	SPP1	Secreted Signaling	PMID: 21907263
ClusterNeural Stem	ClusterCA_neurons	SPP1	ITGA4_ITGB1	5.72969e-05	0	SPP1_ITGA4_ITGB1	SPP1 - (ITGA4+ITGB1)	SPP1	Secreted Signaling	PMID: 21907263
ClusterNeuroblast	ClusterCA_neurons	SPP1	ITGA4_ITGB1	0.00304337	0	SPP1_ITGA4_ITGB1	SPP1 - (ITGA4+ITGB1)	SPP1	Secreted Signaling	PMID: 21907263
ClustermOli	ClusterCA_neurons	SPP1	ITGA4_ITGB1	0.00286115	0	SPP1_ITGA4_ITGB1	SPP1 - (ITGA4+ITGB1)	SPP1	Secreted Signaling	PMID: 21907263
ClusterEndothelial	ClusterCA2-4_neurons	SPP1	ITGA9_ITGB1	0.003933	0	SPP1_ITGA9_ITGB1	SPP1 - (ITGA9+ITGB1)	SPP1	Secreted Signaling	PMID: 21907263
ClusterEpendymal	ClusterCA2-4_neurons	SPP1	ITGA9_ITGB1	0.00694772	0	SPP1_ITGA9_ITGB1	SPP1 - (ITGA9+ITGB1)	SPP1	Secreted Signaling	PMID: 21907263
ClusterMicroglia	ClusterCA2-4_neurons	SPP1	ITGA9_ITGB1	0.0665452	0	SPP1_ITGA9_ITGB1	SPP1 - (ITGA9+ITGB1)	SPP1	Secreted Signaling	PMID: 21907263
ClusterNeuroblast	ClusterCA2-4_neurons	SPP1	ITGA9_ITGB1	0.0373472	0	SPP1_ITGA9_ITGB1	SPP1 - (ITGA9+ITGB1)	SPP1	Secreted Signaling	PMID: 21907263
ClustermOli	ClusterCA2-4_neurons	SPP1	ITGA9_ITGB1	0.0351836	0	SPP1_ITGA9_ITGB1	SPP1 - (ITGA9+ITGB1)	SPP1	Secreted Signaling	PMID: 21907263
ClusterEpendymal	ClusterCA_neurons	SPP1	ITGA9_ITGB1	0.00349395	0	SPP1_ITGA9_ITGB1	SPP1 - (ITGA9+ITGB1)	SPP1	Secreted Signaling	PMID: 21907263
ClusterMicroglia	ClusterCA_neurons	SPP1	ITGA9_ITGB1	0.0344941	0	SPP1_ITGA9_ITGB1	SPP1 - (ITGA9+ITGB1)	SPP1	Secreted Signaling	PMID: 21907263
ClusterNeuroblast	ClusterCA_neurons	SPP1	ITGA9_ITGB1	0.0190718	0	SPP1_ITGA9_ITGB1	SPP1 - (ITGA9+ITGB1)	SPP1	Secreted Signaling	PMID: 21907263
ClustermOli	ClusterCA_neurons	SPP1	ITGA9_ITGB1	0.0179472	0	SPP1_ITGA9_ITGB1	SPP1 - (ITGA9+ITGB1)	SPP1	Secreted Signaling	PMID: 21907263
ClusterMicroglia	ClusterEpendymal	SPP1	ITGA9_ITGB1	0.0185925	0	SPP1_ITGA9_ITGB1	SPP1 - (ITGA9+ITGB1)	SPP1	Secreted Signaling	PMID: 21907263
ClusterNeuroblast	ClusterEpendymal	SPP1	ITGA9_ITGB1	0.0102047	0	SPP1_ITGA9_ITGB1	SPP1 - (ITGA9+ITGB1)	SPP1	Secreted Signaling	PMID: 21907263
ClustermOli	ClusterEpendymal	SPP1	ITGA9_ITGB1	0.0095978	0	SPP1_ITGA9_ITGB1	SPP1 - (ITGA9+ITGB1)	SPP1	Secreted Signaling	PMID: 21907263
ClusterMicroglia	ClusterGABA_neurons	SPP1	ITGA9_ITGB1	0.0182405	0	SPP1_ITGA9_ITGB1	SPP1 - (ITGA9+ITGB1)	SPP1	Secreted Signaling	PMID: 21907263
ClusterNeuroblast	ClusterGABA_neurons	SPP1	ITGA9_ITGB1	0.0100098	0	SPP1_ITGA9_ITGB1	SPP1 - (ITGA9+ITGB1)	SPP1	Secreted Signaling	PMID: 21907263
ClustermOli	ClusterGABA_neurons	SPP1	ITGA9_ITGB1	0.00941444	0	SPP1_ITGA9_ITGB1	SPP1 - (ITGA9+ITGB1)	SPP1	Secreted Signaling	PMID: 21907263
ClusterEpendymal	ClusterImmature	SPP1	ITGA9_ITGB1	0.00472778	0	SPP1_ITGA9_ITGB1	SPP1 - (ITGA9+ITGB1)	SPP1	Secreted Signaling	PMID: 21907263
ClusterMicroglia	ClusterImmature	SPP1	ITGA9_ITGB1	0.0461679	0	SPP1_ITGA9_ITGB1	SPP1 - (ITGA9+ITGB1)	SPP1	Secreted Signaling	PMID: 21907263
ClusterNeuroblast	ClusterImmature	SPP1	ITGA9_ITGB1	0.025665	0	SPP1_ITGA9_ITGB1	SPP1 - (ITGA9+ITGB1)	SPP1	Secreted Signaling	PMID: 21907263
ClustermOli	ClusterImmature	SPP1	ITGA9_ITGB1	0.0241612	0	SPP1_ITGA9_ITGB1	SPP1 - (ITGA9+ITGB1)	SPP1	Secreted Signaling	PMID: 21907263
ClusterEpendymal	ClusterMicroglia	SPP1	ITGA9_ITGB1	0.00400551	0	SPP1_ITGA9_ITGB1	SPP1 - (ITGA9+ITGB1)	SPP1	Secreted Signaling	PMID: 21907263
ClusterMicroglia	ClusterMicroglia	SPP1	ITGA9_ITGB1	0.0393652	0	SPP1_ITGA9_ITGB1	SPP1 - (ITGA9+ITGB1)	SPP1	Secreted Signaling	PMID: 21907263
ClusterNeuroblast	ClusterMicroglia	SPP1	ITGA9_ITGB1	0.0218143	0	SPP1_ITGA9_ITGB1	SPP1 - (ITGA9+ITGB1)	SPP1	Secreted Signaling	PMID: 21907263
ClustermOli	ClusterMicroglia	SPP1	ITGA9_ITGB1	0.0205313	0	SPP1_ITGA9_ITGB1	SPP1 - (ITGA9+ITGB1)	SPP1	Secreted Signaling	PMID: 21907263
ClusterMicroglia	ClusterOPCs	SPP1	ITGA9_ITGB1	0.0289063	0	SPP1_ITGA9_ITGB1	SPP1 - (ITGA9+ITGB1)	SPP1	Secreted Signaling	PMID: 21907263
ClusterNeuroblast	ClusterOPCs	SPP1	ITGA9_ITGB1	0.0159411	0	SPP1_ITGA9_ITGB1	SPP1 - (ITGA9+ITGB1)	SPP1	Secreted Signaling	PMID: 21907263
ClustermOli	ClusterOPCs	SPP1	ITGA9_ITGB1	0.0149982	0	SPP1_ITGA9_ITGB1	SPP1 - (ITGA9+ITGB1)	SPP1	Secreted Signaling	PMID: 21907263
ClusterEpendymal	ClustermGC	SPP1	ITGA9_ITGB1	0.00464082	0	SPP1_ITGA9_ITGB1	SPP1 - (ITGA9+ITGB1)	SPP1	Secreted Signaling	PMID: 21907263
ClusterMicroglia	ClustermGC	SPP1	ITGA9_ITGB1	0.0453535	0	SPP1_ITGA9_ITGB1	SPP1 - (ITGA9+ITGB1)	SPP1	Secreted Signaling	PMID: 21907263
ClusterNeuroblast	ClustermGC	SPP1	ITGA9_ITGB1	0.0252027	0	SPP1_ITGA9_ITGB1	SPP1 - (ITGA9+ITGB1)	SPP1	Secreted Signaling	PMID: 21907263
ClustermOli	ClustermGC	SPP1	ITGA9_ITGB1	0.0237253	0	SPP1_ITGA9_ITGB1	SPP1 - (ITGA9+ITGB1)	SPP1	Secreted Signaling	PMID: 21907263
ClusterEndothelial	ClusterCA_neurons	SPP1	ITGA8_ITGB1	0.00109318	0.03	SPP1_ITGA8_ITGB1	SPP1 - (ITGA8+ITGB1)	SPP1	Secreted Signaling	PMID: 21907263
ClusterEpendymal	ClusterCA_neurons	SPP1	ITGA8_ITGB1	0.00193535	0	SPP1_ITGA8_ITGB1	SPP1 - (ITGA8+ITGB1)	SPP1	Secreted Signaling	PMID: 21907263
ClusterMicroglia	ClusterCA_neurons	SPP1	ITGA8_ITGB1	0.0193757	0	SPP1_ITGA8_ITGB1	SPP1 - (ITGA8+ITGB1)	SPP1	Secreted Signaling	PMID: 21907263
ClusterNeural Stem	ClusterCA_neurons	SPP1	ITGA8_ITGB1	0.000201795	0.03	SPP1_ITGA8_ITGB1	SPP1 - (ITGA8+ITGB1)	SPP1	Secreted Signaling	PMID: 21907263
ClusterNeuroblast	ClusterCA_neurons	SPP1	ITGA8_ITGB1	0.0106384	0	SPP1_ITGA8_ITGB1	SPP1 - (ITGA8+ITGB1)	SPP1	Secreted Signaling	PMID: 21907263
ClustermOli	ClusterCA_neurons	SPP1	ITGA8_ITGB1	0.010006	0	SPP1_ITGA8_ITGB1	SPP1 - (ITGA8+ITGB1)	SPP1	Secreted Signaling	PMID: 21907263
ClusterEndothelial	ClusterGABA_neurons	SPP1	ITGA8_ITGB1	0.000937801	0.02	SPP1_ITGA8_ITGB1	SPP1 - (ITGA8+ITGB1)	SPP1	Secreted Signaling	PMID: 21907263
ClusterEpendymal	ClusterGABA_neurons	SPP1	ITGA8_ITGB1	0.00166047	0.02	SPP1_ITGA8_ITGB1	SPP1 - (ITGA8+ITGB1)	SPP1	Secreted Signaling	PMID: 21907263
ClusterMicroglia	ClusterGABA_neurons	SPP1	ITGA8_ITGB1	0.0166651	0	SPP1_ITGA8_ITGB1	SPP1 - (ITGA8+ITGB1)	SPP1	Secreted Signaling	PMID: 21907263
ClusterNeural Stem	ClusterGABA_neurons	SPP1	ITGA8_ITGB1	0.000173091	0.02	SPP1_ITGA8_ITGB1	SPP1 - (ITGA8+ITGB1)	SPP1	Secreted Signaling	PMID: 21907263
ClusterNeuroblast	ClusterGABA_neurons	SPP1	ITGA8_ITGB1	0.0091387	0	SPP1_ITGA8_ITGB1	SPP1 - (ITGA8+ITGB1)	SPP1	Secreted Signaling	PMID: 21907263
ClustermOli	ClusterGABA_neurons	SPP1	ITGA8_ITGB1	0.00859467	0	SPP1_ITGA8_ITGB1	SPP1 - (ITGA8+ITGB1)	SPP1	Secreted Signaling	PMID: 21907263
ClusterEndothelial	ClusterImmature	SPP1	ITGA8_ITGB1	0.00290935	0	SPP1_ITGA8_ITGB1	SPP1 - (ITGA8+ITGB1)	SPP1	Secreted Signaling	PMID: 21907263
ClusterEpendymal	ClusterImmature	SPP1	ITGA8_ITGB1	0.00514348	0	SPP1_ITGA8_ITGB1	SPP1 - (ITGA8+ITGB1)	SPP1	Secreted Signaling	PMID: 21907263
ClusterMicroglia	ClusterImmature	SPP1	ITGA8_ITGB1	0.0500442	0	SPP1_ITGA8_ITGB1	SPP1 - (ITGA8+ITGB1)	SPP1	Secreted Signaling	PMID: 21907263
ClusterNeuroblast	ClusterImmature	SPP1	ITGA8_ITGB1	0.0278702	0	SPP1_ITGA8_ITGB1	SPP1 - (ITGA8+ITGB1)	SPP1	Secreted Signaling	PMID: 21907263
ClustermOli	ClusterImmature	SPP1	ITGA8_ITGB1	0.0262406	0	SPP1_ITGA8_ITGB1	SPP1 - (ITGA8+ITGB1)	SPP1	Secreted Signaling	PMID: 21907263
ClusterEndothelial	ClusterOPCs	SPP1	ITGA8_ITGB1	0.00171744	0	SPP1_ITGA8_ITGB1	SPP1 - (ITGA8+ITGB1)	SPP1	Secreted Signaling	PMID: 21907263
ClusterEpendymal	ClusterOPCs	SPP1	ITGA8_ITGB1	0.00303907	0	SPP1_ITGA8_ITGB1	SPP1 - (ITGA8+ITGB1)	SPP1	Secreted Signaling	PMID: 21907263
ClusterMicroglia	ClusterOPCs	SPP1	ITGA8_ITGB1	0.0301254	0	SPP1_ITGA8_ITGB1	SPP1 - (ITGA8+ITGB1)	SPP1	Secreted Signaling	PMID: 21907263
ClusterNeural Stem	ClusterOPCs	SPP1	ITGA8_ITGB1	0.000317192	0	SPP1_ITGA8_ITGB1	SPP1 - (ITGA8+ITGB1)	SPP1	Secreted Signaling	PMID: 21907263
ClusterNeuroblast	ClusterOPCs	SPP1	ITGA8_ITGB1	0.0166227	0	SPP1_ITGA8_ITGB1	SPP1 - (ITGA8+ITGB1)	SPP1	Secreted Signaling	PMID: 21907263
ClustermOli	ClusterOPCs	SPP1	ITGA8_ITGB1	0.0156402	0	SPP1_ITGA8_ITGB1	SPP1 - (ITGA8+ITGB1)	SPP1	Secreted Signaling	PMID: 21907263
ClusterEndothelial	ClustermGC	SPP1	ITGA8_ITGB1	0.00397246	0	SPP1_ITGA8_ITGB1	SPP1 - (ITGA8+ITGB1)	SPP1	Secreted Signaling	PMID: 21907263
ClusterEpendymal	ClustermGC	SPP1	ITGA8_ITGB1	0.00701722	0	SPP1_ITGA8_ITGB1	SPP1 - (ITGA8+ITGB1)	SPP1	Secreted Signaling	PMID: 21907263
ClusterMicroglia	ClustermGC	SPP1	ITGA8_ITGB1	0.0671706	0	SPP1_ITGA8_ITGB1	SPP1 - (ITGA8+ITGB1)	SPP1	Secreted Signaling	PMID: 21907263
ClusterNeural Stem	ClustermGC	SPP1	ITGA8_ITGB1	0.000735022	0	SPP1_ITGA8_ITGB1	SPP1 - (ITGA8+ITGB1)	SPP1	Secreted Signaling	PMID: 21907263
ClusterNeuroblast	ClustermGC	SPP1	ITGA8_ITGB1	0.0377093	0	SPP1_ITGA8_ITGB1	SPP1 - (ITGA8+ITGB1)	SPP1	Secreted Signaling	PMID: 21907263
ClustermOli	ClustermGC	SPP1	ITGA8_ITGB1	0.0355254	0	SPP1_ITGA8_ITGB1	SPP1 - (ITGA8+ITGB1)	SPP1	Secreted Signaling	PMID: 21907263
ClusterCA2-4_neurons	ClusterAstrocytes	NAMPT	INSR	0.000964803	0	NAMPT_INSR	NAMPT - INSR	VISFATIN	Secreted Signaling	PMID: 28490838
ClusterCA_neurons	ClusterAstrocytes	NAMPT	INSR	0.000699278	0	NAMPT_INSR	NAMPT - INSR	VISFATIN	Secreted Signaling	PMID: 28490838
ClusterEndothelial	ClusterAstrocytes	NAMPT	INSR	0.0119675	0	NAMPT_INSR	NAMPT - INSR	VISFATIN	Secreted Signaling	PMID: 28490838
ClusterEpendymal	ClusterAstrocytes	NAMPT	INSR	0.00190612	0	NAMPT_INSR	NAMPT - INSR	VISFATIN	Secreted Signaling	PMID: 28490838
ClusterGABA_neurons	ClusterAstrocytes	NAMPT	INSR	0.000923027	0	NAMPT_INSR	NAMPT - INSR	VISFATIN	Secreted Signaling	PMID: 28490838
ClusterImmature	ClusterAstrocytes	NAMPT	INSR	0.00118323	0	NAMPT_INSR	NAMPT - INSR	VISFATIN	Secreted Signaling	PMID: 28490838
ClusterMicroglia	ClusterAstrocytes	NAMPT	INSR	0.00344257	0	NAMPT_INSR	NAMPT - INSR	VISFATIN	Secreted Signaling	PMID: 28490838
ClusterNeural Stem	ClusterAstrocytes	NAMPT	INSR	0.00259747	0	NAMPT_INSR	NAMPT - INSR	VISFATIN	Secreted Signaling	PMID: 28490838
ClustermGC	ClusterAstrocytes	NAMPT	INSR	0.000976422	0	NAMPT_INSR	NAMPT - INSR	VISFATIN	Secreted Signaling	PMID: 28490838
ClusterCA2-4_neurons	ClusterCA2-4_neurons	NAMPT	INSR	0.000475716	0.04	NAMPT_INSR	NAMPT - INSR	VISFATIN	Secreted Signaling	PMID: 28490838
ClusterCA_neurons	ClusterCA2-4_neurons	NAMPT	INSR	0.000344746	0	NAMPT_INSR	NAMPT - INSR	VISFATIN	Secreted Signaling	PMID: 28490838
ClusterEndothelial	ClusterCA2-4_neurons	NAMPT	INSR	0.00593396	0	NAMPT_INSR	NAMPT - INSR	VISFATIN	Secreted Signaling	PMID: 28490838
ClusterEpendymal	ClusterCA2-4_neurons	NAMPT	INSR	0.000940298	0	NAMPT_INSR	NAMPT - INSR	VISFATIN	Secreted Signaling	PMID: 28490838
ClusterGABA_neurons	ClusterCA2-4_neurons	NAMPT	INSR	0.000455107	0	NAMPT_INSR	NAMPT - INSR	VISFATIN	Secreted Signaling	PMID: 28490838
ClusterImmature	ClusterCA2-4_neurons	NAMPT	INSR	0.00058348	0.01	NAMPT_INSR	NAMPT - INSR	VISFATIN	Secreted Signaling	PMID: 28490838
ClusterMicroglia	ClusterCA2-4_neurons	NAMPT	INSR	0.00169956	0	NAMPT_INSR	NAMPT - INSR	VISFATIN	Secreted Signaling	PMID: 28490838
ClusterNeural Stem	ClusterCA2-4_neurons	NAMPT	INSR	0.00128179	0	NAMPT_INSR	NAMPT - INSR	VISFATIN	Secreted Signaling	PMID: 28490838
ClustermGC	ClusterCA2-4_neurons	NAMPT	INSR	0.000481447	0	NAMPT_INSR	NAMPT - INSR	VISFATIN	Secreted Signaling	PMID: 28490838
ClusterCA2-4_neurons	ClusterCA_neurons	NAMPT	INSR	0.00168283	0	NAMPT_INSR	NAMPT - INSR	VISFATIN	Secreted Signaling	PMID: 28490838
ClusterCA_neurons	ClusterCA_neurons	NAMPT	INSR	0.00121994	0	NAMPT_INSR	NAMPT - INSR	VISFATIN	Secreted Signaling	PMID: 28490838
ClusterEndothelial	ClusterCA_neurons	NAMPT	INSR	0.0207044	0	NAMPT_INSR	NAMPT - INSR	VISFATIN	Secreted Signaling	PMID: 28490838
ClusterEpendymal	ClusterCA_neurons	NAMPT	INSR	0.00332236	0	NAMPT_INSR	NAMPT - INSR	VISFATIN	Secreted Signaling	PMID: 28490838
ClusterGABA_neurons	ClusterCA_neurons	NAMPT	INSR	0.00161002	0	NAMPT_INSR	NAMPT - INSR	VISFATIN	Secreted Signaling	PMID: 28490838
ClusterImmature	ClusterCA_neurons	NAMPT	INSR	0.00206348	0	NAMPT_INSR	NAMPT - INSR	VISFATIN	Secreted Signaling	PMID: 28490838
ClusterMicroglia	ClusterCA_neurons	NAMPT	INSR	0.00599355	0	NAMPT_INSR	NAMPT - INSR	VISFATIN	Secreted Signaling	PMID: 28490838
ClusterNeural Stem	ClusterCA_neurons	NAMPT	INSR	0.00452506	0	NAMPT_INSR	NAMPT - INSR	VISFATIN	Secreted Signaling	PMID: 28490838
ClustermGC	ClusterCA_neurons	NAMPT	INSR	0.00170308	0	NAMPT_INSR	NAMPT - INSR	VISFATIN	Secreted Signaling	PMID: 28490838
ClusterCA2-4_neurons	ClusterEndothelial	NAMPT	INSR	0.00362397	0	NAMPT_INSR	NAMPT - INSR	VISFATIN	Secreted Signaling	PMID: 28490838
ClusterCA_neurons	ClusterEndothelial	NAMPT	INSR	0.00262854	0	NAMPT_INSR	NAMPT - INSR	VISFATIN	Secreted Signaling	PMID: 28490838
ClusterEndothelial	ClusterEndothelial	NAMPT	INSR	0.0436278	0	NAMPT_INSR	NAMPT - INSR	VISFATIN	Secreted Signaling	PMID: 28490838
ClusterEpendymal	ClusterEndothelial	NAMPT	INSR	0.00714116	0	NAMPT_INSR	NAMPT - INSR	VISFATIN	Secreted Signaling	PMID: 28490838
ClusterGABA_neurons	ClusterEndothelial	NAMPT	INSR	0.00346745	0	NAMPT_INSR	NAMPT - INSR	VISFATIN	Secreted Signaling	PMID: 28490838
ClusterImmature	ClusterEndothelial	NAMPT	INSR	0.00444174	0	NAMPT_INSR	NAMPT - INSR	VISFATIN	Secreted Signaling	PMID: 28490838
ClusterMicroglia	ClusterEndothelial	NAMPT	INSR	0.0128431	0	NAMPT_INSR	NAMPT - INSR	VISFATIN	Secreted Signaling	PMID: 28490838
ClusterNeural Stem	ClusterEndothelial	NAMPT	INSR	0.00971279	0	NAMPT_INSR	NAMPT - INSR	VISFATIN	Secreted Signaling	PMID: 28490838
ClustermGC	ClusterEndothelial	NAMPT	INSR	0.00366749	0	NAMPT_INSR	NAMPT - INSR	VISFATIN	Secreted Signaling	PMID: 28490838
ClusterCA2-4_neurons	ClusterEpendymal	NAMPT	INSR	0.00187774	0	NAMPT_INSR	NAMPT - INSR	VISFATIN	Secreted Signaling	PMID: 28490838
ClusterCA_neurons	ClusterEpendymal	NAMPT	INSR	0.00136131	0	NAMPT_INSR	NAMPT - INSR	VISFATIN	Secreted Signaling	PMID: 28490838
ClusterEndothelial	ClusterEpendymal	NAMPT	INSR	0.0230515	0	NAMPT_INSR	NAMPT - INSR	VISFATIN	Secreted Signaling	PMID: 28490838
ClusterEpendymal	ClusterEpendymal	NAMPT	INSR	0.00370647	0	NAMPT_INSR	NAMPT - INSR	VISFATIN	Secreted Signaling	PMID: 28490838
ClusterGABA_neurons	ClusterEpendymal	NAMPT	INSR	0.00179651	0	NAMPT_INSR	NAMPT - INSR	VISFATIN	Secreted Signaling	PMID: 28490838
ClusterImmature	ClusterEpendymal	NAMPT	INSR	0.00230238	0	NAMPT_INSR	NAMPT - INSR	VISFATIN	Secreted Signaling	PMID: 28490838
ClusterMicroglia	ClusterEpendymal	NAMPT	INSR	0.0066844	0	NAMPT_INSR	NAMPT - INSR	VISFATIN	Secreted Signaling	PMID: 28490838
ClusterNeural Stem	ClusterEpendymal	NAMPT	INSR	0.0050475	0	NAMPT_INSR	NAMPT - INSR	VISFATIN	Secreted Signaling	PMID: 28490838
ClustermGC	ClusterEpendymal	NAMPT	INSR	0.00190034	0	NAMPT_INSR	NAMPT - INSR	VISFATIN	Secreted Signaling	PMID: 28490838
ClusterCA2-4_neurons	ClusterGABA_neurons	NAMPT	INSR	0.00252733	0	NAMPT_INSR	NAMPT - INSR	VISFATIN	Secreted Signaling	PMID: 28490838
ClusterCA_neurons	ClusterGABA_neurons	NAMPT	INSR	0.00183257	0	NAMPT_INSR	NAMPT - INSR	VISFATIN	Secreted Signaling	PMID: 28490838
ClusterEndothelial	ClusterGABA_neurons	NAMPT	INSR	0.0307999	0	NAMPT_INSR	NAMPT - INSR	VISFATIN	Secreted Signaling	PMID: 28490838
ClusterEpendymal	ClusterGABA_neurons	NAMPT	INSR	0.00498551	0	NAMPT_INSR	NAMPT - INSR	VISFATIN	Secreted Signaling	PMID: 28490838
ClusterGABA_neurons	ClusterGABA_neurons	NAMPT	INSR	0.00241806	0	NAMPT_INSR	NAMPT - INSR	VISFATIN	Secreted Signaling	PMID: 28490838
ClusterImmature	ClusterGABA_neurons	NAMPT	INSR	0.0030984	0	NAMPT_INSR	NAMPT - INSR	VISFATIN	Secreted Signaling	PMID: 28490838
ClusterMicroglia	ClusterGABA_neurons	NAMPT	INSR	0.00898182	0	NAMPT_INSR	NAMPT - INSR	VISFATIN	Secreted Signaling	PMID: 28490838
ClusterNeural Stem	ClusterGABA_neurons	NAMPT	INSR	0.00678617	0	NAMPT_INSR	NAMPT - INSR	VISFATIN	Secreted Signaling	PMID: 28490838
ClustermGC	ClusterGABA_neurons	NAMPT	INSR	0.00255771	0	NAMPT_INSR	NAMPT - INSR	VISFATIN	Secreted Signaling	PMID: 28490838
ClusterCA2-4_neurons	ClusterImmature	NAMPT	INSR	0.00163408	0	NAMPT_INSR	NAMPT - INSR	VISFATIN	Secreted Signaling	PMID: 28490838
ClusterCA_neurons	ClusterImmature	NAMPT	INSR	0.00118458	0	NAMPT_INSR	NAMPT - INSR	VISFATIN	Secreted Signaling	PMID: 28490838
ClusterEndothelial	ClusterImmature	NAMPT	INSR	0.0201157	0	NAMPT_INSR	NAMPT - INSR	VISFATIN	Secreted Signaling	PMID: 28490838
ClusterEpendymal	ClusterImmature	NAMPT	INSR	0.00322627	0	NAMPT_INSR	NAMPT - INSR	VISFATIN	Secreted Signaling	PMID: 28490838
ClusterGABA_neurons	ClusterImmature	NAMPT	INSR	0.00156337	0	NAMPT_INSR	NAMPT - INSR	VISFATIN	Secreted Signaling	PMID: 28490838
ClusterImmature	ClusterImmature	NAMPT	INSR	0.00200373	0	NAMPT_INSR	NAMPT - INSR	VISFATIN	Secreted Signaling	PMID: 28490838
ClusterMicroglia	ClusterImmature	NAMPT	INSR	0.00582065	0	NAMPT_INSR	NAMPT - INSR	VISFATIN	Secreted Signaling	PMID: 28490838
ClusterNeural Stem	ClusterImmature	NAMPT	INSR	0.00439433	0	NAMPT_INSR	NAMPT - INSR	VISFATIN	Secreted Signaling	PMID: 28490838
ClustermGC	ClusterImmature	NAMPT	INSR	0.00165375	0	NAMPT_INSR	NAMPT - INSR	VISFATIN	Secreted Signaling	PMID: 28490838
ClusterCA2-4_neurons	ClusterNeural Stem	NAMPT	INSR	0.00106581	0	NAMPT_INSR	NAMPT - INSR	VISFATIN	Secreted Signaling	PMID: 28490838
ClusterCA_neurons	ClusterNeural Stem	NAMPT	INSR	0.000772507	0	NAMPT_INSR	NAMPT - INSR	VISFATIN	Secreted Signaling	PMID: 28490838
ClusterEndothelial	ClusterNeural Stem	NAMPT	INSR	0.0132052	0	NAMPT_INSR	NAMPT - INSR	VISFATIN	Secreted Signaling	PMID: 28490838
ClusterEpendymal	ClusterNeural Stem	NAMPT	INSR	0.00210546	0	NAMPT_INSR	NAMPT - INSR	VISFATIN	Secreted Signaling	PMID: 28490838
ClusterGABA_neurons	ClusterNeural Stem	NAMPT	INSR	0.00101966	0	NAMPT_INSR	NAMPT - INSR	VISFATIN	Secreted Signaling	PMID: 28490838
ClusterImmature	ClusterNeural Stem	NAMPT	INSR	0.00130707	0	NAMPT_INSR	NAMPT - INSR	VISFATIN	Secreted Signaling	PMID: 28490838
ClusterMicroglia	ClusterNeural Stem	NAMPT	INSR	0.00380199	0	NAMPT_INSR	NAMPT - INSR	VISFATIN	Secreted Signaling	PMID: 28490838
ClusterNeural Stem	ClusterNeural Stem	NAMPT	INSR	0.00286891	0	NAMPT_INSR	NAMPT - INSR	VISFATIN	Secreted Signaling	PMID: 28490838
ClustermGC	ClusterNeural Stem	NAMPT	INSR	0.00107864	0	NAMPT_INSR	NAMPT - INSR	VISFATIN	Secreted Signaling	PMID: 28490838
ClusterCA2-4_neurons	ClusterNeuroblast	NAMPT	INSR	0.00150367	0	NAMPT_INSR	NAMPT - INSR	VISFATIN	Secreted Signaling	PMID: 28490838
ClusterCA_neurons	ClusterNeuroblast	NAMPT	INSR	0.00109001	0	NAMPT_INSR	NAMPT - INSR	VISFATIN	Secreted Signaling	PMID: 28490838
ClusterEndothelial	ClusterNeuroblast	NAMPT	INSR	0.0185377	0	NAMPT_INSR	NAMPT - INSR	VISFATIN	Secreted Signaling	PMID: 28490838
ClusterEpendymal	ClusterNeuroblast	NAMPT	INSR	0.00296917	0	NAMPT_INSR	NAMPT - INSR	VISFATIN	Secreted Signaling	PMID: 28490838
ClusterGABA_neurons	ClusterNeuroblast	NAMPT	INSR	0.0014386	0	NAMPT_INSR	NAMPT - INSR	VISFATIN	Secreted Signaling	PMID: 28490838
ClusterImmature	ClusterNeuroblast	NAMPT	INSR	0.00184387	0	NAMPT_INSR	NAMPT - INSR	VISFATIN	Secreted Signaling	PMID: 28490838
ClusterMicroglia	ClusterNeuroblast	NAMPT	INSR	0.00535792	0	NAMPT_INSR	NAMPT - INSR	VISFATIN	Secreted Signaling	PMID: 28490838
ClusterNeural Stem	ClusterNeuroblast	NAMPT	INSR	0.00404453	0	NAMPT_INSR	NAMPT - INSR	VISFATIN	Secreted Signaling	PMID: 28490838
ClustermGC	ClusterNeuroblast	NAMPT	INSR	0.00152177	0	NAMPT_INSR	NAMPT - INSR	VISFATIN	Secreted Signaling	PMID: 28490838
ClusterCA2-4_neurons	ClusterOPCs	NAMPT	INSR	0.000989487	0	NAMPT_INSR	NAMPT - INSR	VISFATIN	Secreted Signaling	PMID: 28490838
ClusterCA_neurons	ClusterOPCs	NAMPT	INSR	0.000717173	0	NAMPT_INSR	NAMPT - INSR	VISFATIN	Secreted Signaling	PMID: 28490838
ClusterEndothelial	ClusterOPCs	NAMPT	INSR	0.0122703	0	NAMPT_INSR	NAMPT - INSR	VISFATIN	Secreted Signaling	PMID: 28490838
ClusterEpendymal	ClusterOPCs	NAMPT	INSR	0.00195484	0	NAMPT_INSR	NAMPT - INSR	VISFATIN	Secreted Signaling	PMID: 28490838
ClusterGABA_neurons	ClusterOPCs	NAMPT	INSR	0.000946643	0	NAMPT_INSR	NAMPT - INSR	VISFATIN	Secreted Signaling	PMID: 28490838
ClusterImmature	ClusterOPCs	NAMPT	INSR	0.0012135	0	NAMPT_INSR	NAMPT - INSR	VISFATIN	Secreted Signaling	PMID: 28490838
ClusterMicroglia	ClusterOPCs	NAMPT	INSR	0.00353042	0	NAMPT_INSR	NAMPT - INSR	VISFATIN	Secreted Signaling	PMID: 28490838
ClusterNeural Stem	ClusterOPCs	NAMPT	INSR	0.00266381	0	NAMPT_INSR	NAMPT - INSR	VISFATIN	Secreted Signaling	PMID: 28490838
ClustermGC	ClusterOPCs	NAMPT	INSR	0.0010014	0	NAMPT_INSR	NAMPT - INSR	VISFATIN	Secreted Signaling	PMID: 28490838
ClusterCA2-4_neurons	ClustermGC	NAMPT	INSR	0.00174007	0	NAMPT_INSR	NAMPT - INSR	VISFATIN	Secreted Signaling	PMID: 28490838
ClusterCA_neurons	ClustermGC	NAMPT	INSR	0.00126145	0	NAMPT_INSR	NAMPT - INSR	VISFATIN	Secreted Signaling	PMID: 28490838
ClusterEndothelial	ClustermGC	NAMPT	INSR	0.0213946	0	NAMPT_INSR	NAMPT - INSR	VISFATIN	Secreted Signaling	PMID: 28490838
ClusterEpendymal	ClustermGC	NAMPT	INSR	0.00343516	0	NAMPT_INSR	NAMPT - INSR	VISFATIN	Secreted Signaling	PMID: 28490838
ClusterGABA_neurons	ClustermGC	NAMPT	INSR	0.00166478	0	NAMPT_INSR	NAMPT - INSR	VISFATIN	Secreted Signaling	PMID: 28490838
ClusterImmature	ClustermGC	NAMPT	INSR	0.00213363	0	NAMPT_INSR	NAMPT - INSR	VISFATIN	Secreted Signaling	PMID: 28490838
ClusterMicroglia	ClustermGC	NAMPT	INSR	0.00619648	0	NAMPT_INSR	NAMPT - INSR	VISFATIN	Secreted Signaling	PMID: 28490838
ClusterNeural Stem	ClustermGC	NAMPT	INSR	0.0046785	0	NAMPT_INSR	NAMPT - INSR	VISFATIN	Secreted Signaling	PMID: 28490838
ClustermGC	ClustermGC	NAMPT	INSR	0.001761	0	NAMPT_INSR	NAMPT - INSR	VISFATIN	Secreted Signaling	PMID: 28490838
ClusterCA2-4_neurons	ClustermOli	NAMPT	INSR	0.00166812	0	NAMPT_INSR	NAMPT - INSR	VISFATIN	Secreted Signaling	PMID: 28490838
ClusterCA_neurons	ClustermOli	NAMPT	INSR	0.00120926	0	NAMPT_INSR	NAMPT - INSR	VISFATIN	Secreted Signaling	PMID: 28490838
ClusterEndothelial	ClustermOli	NAMPT	INSR	0.0205267	0	NAMPT_INSR	NAMPT - INSR	VISFATIN	Secreted Signaling	PMID: 28490838
ClusterEpendymal	ClustermOli	NAMPT	INSR	0.00329335	0	NAMPT_INSR	NAMPT - INSR	VISFATIN	Secreted Signaling	PMID: 28490838
ClusterGABA_neurons	ClustermOli	NAMPT	INSR	0.00159593	0	NAMPT_INSR	NAMPT - INSR	VISFATIN	Secreted Signaling	PMID: 28490838
ClusterImmature	ClustermOli	NAMPT	INSR	0.00204544	0	NAMPT_INSR	NAMPT - INSR	VISFATIN	Secreted Signaling	PMID: 28490838
ClusterMicroglia	ClustermOli	NAMPT	INSR	0.00594136	0	NAMPT_INSR	NAMPT - INSR	VISFATIN	Secreted Signaling	PMID: 28490838
ClusterNeural Stem	ClustermOli	NAMPT	INSR	0.0044856	0	NAMPT_INSR	NAMPT - INSR	VISFATIN	Secreted Signaling	PMID: 28490838
ClustermGC	ClustermOli	NAMPT	INSR	0.00168819	0	NAMPT_INSR	NAMPT - INSR	VISFATIN	Secreted Signaling	PMID: 28490838
ClusterCA2-4_neurons	ClusterEndothelial	ANGPTL1	ITGA1_ITGB1	0.00342315	0	ANGPTL1_ITGA1_ITGB1	ANGPTL1 - (ITGA1+ITGB1)	ANGPTL	Secreted Signaling	PMID: 24478758
ClusterImmature	ClusterEndothelial	ANGPTL1	ITGA1_ITGB1	0.00487657	0	ANGPTL1_ITGA1_ITGB1	ANGPTL1 - (ITGA1+ITGB1)	ANGPTL	Secreted Signaling	PMID: 24478758
ClusterAstrocytes	ClusterEndothelial	ANGPTL4	CDH5	0.00842738	0	ANGPTL4_CDH5	ANGPTL4 - CDH5	ANGPTL	Secreted Signaling	PMID: 30049845
ClusterEndothelial	ClusterEndothelial	ANGPTL4	CDH5	0.00138414	0	ANGPTL4_CDH5	ANGPTL4 - CDH5	ANGPTL	Secreted Signaling	PMID: 30049845
ClusterEpendymal	ClusterEndothelial	ANGPTL4	CDH5	0.00122159	0	ANGPTL4_CDH5	ANGPTL4 - CDH5	ANGPTL	Secreted Signaling	PMID: 30049845
ClusterNeural Stem	ClusterEndothelial	ANGPTL4	CDH5	0.00328056	0	ANGPTL4_CDH5	ANGPTL4 - CDH5	ANGPTL	Secreted Signaling	PMID: 30049845
ClusterAstrocytes	ClusterAstrocytes	ANGPTL4	CDH11	0.0129672	0	ANGPTL4_CDH11	ANGPTL4 - CDH11	ANGPTL	Secreted Signaling	PMID: 30049845
ClusterEndothelial	ClusterAstrocytes	ANGPTL4	CDH11	0.00213796	0	ANGPTL4_CDH11	ANGPTL4 - CDH11	ANGPTL	Secreted Signaling	PMID: 30049845
ClusterEpendymal	ClusterAstrocytes	ANGPTL4	CDH11	0.00188705	0	ANGPTL4_CDH11	ANGPTL4 - CDH11	ANGPTL	Secreted Signaling	PMID: 30049845
ClusterNeural Stem	ClusterAstrocytes	ANGPTL4	CDH11	0.00506197	0	ANGPTL4_CDH11	ANGPTL4 - CDH11	ANGPTL	Secreted Signaling	PMID: 30049845
ClusterAstrocytes	ClusterCA2-4_neurons	ANGPTL4	CDH11	0.033642	0	ANGPTL4_CDH11	ANGPTL4 - CDH11	ANGPTL	Secreted Signaling	PMID: 30049845
ClusterEndothelial	ClusterCA2-4_neurons	ANGPTL4	CDH11	0.00564544	0	ANGPTL4_CDH11	ANGPTL4 - CDH11	ANGPTL	Secreted Signaling	PMID: 30049845
ClusterEpendymal	ClusterCA2-4_neurons	ANGPTL4	CDH11	0.00498496	0	ANGPTL4_CDH11	ANGPTL4 - CDH11	ANGPTL	Secreted Signaling	PMID: 30049845
ClusterNeural Stem	ClusterCA2-4_neurons	ANGPTL4	CDH11	0.0133026	0	ANGPTL4_CDH11	ANGPTL4 - CDH11	ANGPTL	Secreted Signaling	PMID: 30049845
ClusterAstrocytes	ClusterCA_neurons	ANGPTL4	CDH11	0.0388017	0	ANGPTL4_CDH11	ANGPTL4 - CDH11	ANGPTL	Secreted Signaling	PMID: 30049845
ClusterEndothelial	ClusterCA_neurons	ANGPTL4	CDH11	0.00654035	0	ANGPTL4_CDH11	ANGPTL4 - CDH11	ANGPTL	Secreted Signaling	PMID: 30049845
ClusterEpendymal	ClusterCA_neurons	ANGPTL4	CDH11	0.00577578	0	ANGPTL4_CDH11	ANGPTL4 - CDH11	ANGPTL	Secreted Signaling	PMID: 30049845
ClusterNeural Stem	ClusterCA_neurons	ANGPTL4	CDH11	0.0153925	0	ANGPTL4_CDH11	ANGPTL4 - CDH11	ANGPTL	Secreted Signaling	PMID: 30049845
ClusterAstrocytes	ClusterEndothelial	ANGPTL4	CDH11	0.0333972	0	ANGPTL4_CDH11	ANGPTL4 - CDH11	ANGPTL	Secreted Signaling	PMID: 30049845
ClusterEndothelial	ClusterEndothelial	ANGPTL4	CDH11	0.00560319	0	ANGPTL4_CDH11	ANGPTL4 - CDH11	ANGPTL	Secreted Signaling	PMID: 30049845
ClusterEpendymal	ClusterEndothelial	ANGPTL4	CDH11	0.00494763	0	ANGPTL4_CDH11	ANGPTL4 - CDH11	ANGPTL	Secreted Signaling	PMID: 30049845
ClusterNeural Stem	ClusterEndothelial	ANGPTL4	CDH11	0.0132038	0	ANGPTL4_CDH11	ANGPTL4 - CDH11	ANGPTL	Secreted Signaling	PMID: 30049845
ClusterAstrocytes	ClusterEpendymal	ANGPTL4	CDH11	0.0222758	0	ANGPTL4_CDH11	ANGPTL4 - CDH11	ANGPTL	Secreted Signaling	PMID: 30049845
ClusterEndothelial	ClusterEpendymal	ANGPTL4	CDH11	0.00370186	0	ANGPTL4_CDH11	ANGPTL4 - CDH11	ANGPTL	Secreted Signaling	PMID: 30049845
ClusterEpendymal	ClusterEpendymal	ANGPTL4	CDH11	0.00326802	0	ANGPTL4_CDH11	ANGPTL4 - CDH11	ANGPTL	Secreted Signaling	PMID: 30049845
ClusterNeural Stem	ClusterEpendymal	ANGPTL4	CDH11	0.00874602	0	ANGPTL4_CDH11	ANGPTL4 - CDH11	ANGPTL	Secreted Signaling	PMID: 30049845
ClusterAstrocytes	ClusterGABA_neurons	ANGPTL4	CDH11	0.0188714	0	ANGPTL4_CDH11	ANGPTL4 - CDH11	ANGPTL	Secreted Signaling	PMID: 30049845
ClusterEndothelial	ClusterGABA_neurons	ANGPTL4	CDH11	0.00312702	0	ANGPTL4_CDH11	ANGPTL4 - CDH11	ANGPTL	Secreted Signaling	PMID: 30049845
ClusterEpendymal	ClusterGABA_neurons	ANGPTL4	CDH11	0.00276036	0	ANGPTL4_CDH11	ANGPTL4 - CDH11	ANGPTL	Secreted Signaling	PMID: 30049845
ClusterNeural Stem	ClusterGABA_neurons	ANGPTL4	CDH11	0.00739371	0	ANGPTL4_CDH11	ANGPTL4 - CDH11	ANGPTL	Secreted Signaling	PMID: 30049845
ClusterAstrocytes	ClusterImmature	ANGPTL4	CDH11	0.0379278	0	ANGPTL4_CDH11	ANGPTL4 - CDH11	ANGPTL	Secreted Signaling	PMID: 30049845
ClusterEndothelial	ClusterImmature	ANGPTL4	CDH11	0.00638821	0	ANGPTL4_CDH11	ANGPTL4 - CDH11	ANGPTL	Secreted Signaling	PMID: 30049845
ClusterEpendymal	ClusterImmature	ANGPTL4	CDH11	0.00564133	0	ANGPTL4_CDH11	ANGPTL4 - CDH11	ANGPTL	Secreted Signaling	PMID: 30049845
ClusterNeural Stem	ClusterImmature	ANGPTL4	CDH11	0.0150375	0	ANGPTL4_CDH11	ANGPTL4 - CDH11	ANGPTL	Secreted Signaling	PMID: 30049845
ClusterAstrocytes	ClusterNeural Stem	ANGPTL4	CDH11	0.0131921	0	ANGPTL4_CDH11	ANGPTL4 - CDH11	ANGPTL	Secreted Signaling	PMID: 30049845
ClusterEndothelial	ClusterNeural Stem	ANGPTL4	CDH11	0.00217545	0	ANGPTL4_CDH11	ANGPTL4 - CDH11	ANGPTL	Secreted Signaling	PMID: 30049845
ClusterEpendymal	ClusterNeural Stem	ANGPTL4	CDH11	0.00192016	0	ANGPTL4_CDH11	ANGPTL4 - CDH11	ANGPTL	Secreted Signaling	PMID: 30049845
ClusterNeural Stem	ClusterNeural Stem	ANGPTL4	CDH11	0.00515048	0	ANGPTL4_CDH11	ANGPTL4 - CDH11	ANGPTL	Secreted Signaling	PMID: 30049845
ClusterAstrocytes	ClusterNeuroblast	ANGPTL4	CDH11	0.0048315	0	ANGPTL4_CDH11	ANGPTL4 - CDH11	ANGPTL	Secreted Signaling	PMID: 30049845
ClusterEndothelial	ClusterNeuroblast	ANGPTL4	CDH11	0.000791143	0	ANGPTL4_CDH11	ANGPTL4 - CDH11	ANGPTL	Secreted Signaling	PMID: 30049845
ClusterEpendymal	ClusterNeuroblast	ANGPTL4	CDH11	0.000698187	0	ANGPTL4_CDH11	ANGPTL4 - CDH11	ANGPTL	Secreted Signaling	PMID: 30049845
ClusterNeural Stem	ClusterNeuroblast	ANGPTL4	CDH11	0.00187663	0	ANGPTL4_CDH11	ANGPTL4 - CDH11	ANGPTL	Secreted Signaling	PMID: 30049845
ClusterAstrocytes	ClusterOPCs	ANGPTL4	CDH11	0.0358024	0	ANGPTL4_CDH11	ANGPTL4 - CDH11	ANGPTL	Secreted Signaling	PMID: 30049845
ClusterEndothelial	ClusterOPCs	ANGPTL4	CDH11	0.00601918	0	ANGPTL4_CDH11	ANGPTL4 - CDH11	ANGPTL	Secreted Signaling	PMID: 30049845
ClusterEpendymal	ClusterOPCs	ANGPTL4	CDH11	0.00531521	0	ANGPTL4_CDH11	ANGPTL4 - CDH11	ANGPTL	Secreted Signaling	PMID: 30049845
ClusterNeural Stem	ClusterOPCs	ANGPTL4	CDH11	0.014176	0	ANGPTL4_CDH11	ANGPTL4 - CDH11	ANGPTL	Secreted Signaling	PMID: 30049845
ClusterAstrocytes	ClustermGC	ANGPTL4	CDH11	0.0410048	0	ANGPTL4_CDH11	ANGPTL4 - CDH11	ANGPTL	Secreted Signaling	PMID: 30049845
ClusterEndothelial	ClustermGC	ANGPTL4	CDH11	0.00692489	0	ANGPTL4_CDH11	ANGPTL4 - CDH11	ANGPTL	Secreted Signaling	PMID: 30049845
ClusterEpendymal	ClustermGC	ANGPTL4	CDH11	0.00611565	0	ANGPTL4_CDH11	ANGPTL4 - CDH11	ANGPTL	Secreted Signaling	PMID: 30049845
ClusterNeural Stem	ClustermGC	ANGPTL4	CDH11	0.016289	0	ANGPTL4_CDH11	ANGPTL4 - CDH11	ANGPTL	Secreted Signaling	PMID: 30049845
ClusterAstrocytes	ClusterAstrocytes	ANGPTL4	SDC2	0.0117184	0	ANGPTL4_SDC2	ANGPTL4 - SDC2	ANGPTL	Secreted Signaling	PMID: 29017031
ClusterEndothelial	ClusterAstrocytes	ANGPTL4	SDC2	0.00193001	0	ANGPTL4_SDC2	ANGPTL4 - SDC2	ANGPTL	Secreted Signaling	PMID: 29017031
ClusterEpendymal	ClusterAstrocytes	ANGPTL4	SDC2	0.00170347	0	ANGPTL4_SDC2	ANGPTL4 - SDC2	ANGPTL	Secreted Signaling	PMID: 29017031
ClusterNeural Stem	ClusterAstrocytes	ANGPTL4	SDC2	0.00457092	0	ANGPTL4_SDC2	ANGPTL4 - SDC2	ANGPTL	Secreted Signaling	PMID: 29017031
ClusterAstrocytes	ClusterEpendymal	ANGPTL4	SDC2	0.015381	0	ANGPTL4_SDC2	ANGPTL4 - SDC2	ANGPTL	Secreted Signaling	PMID: 29017031
ClusterEndothelial	ClusterEpendymal	ANGPTL4	SDC2	0.00254112	0	ANGPTL4_SDC2	ANGPTL4 - SDC2	ANGPTL	Secreted Signaling	PMID: 29017031
ClusterEpendymal	ClusterEpendymal	ANGPTL4	SDC2	0.00224301	0	ANGPTL4_SDC2	ANGPTL4 - SDC2	ANGPTL	Secreted Signaling	PMID: 29017031
ClusterNeural Stem	ClusterEpendymal	ANGPTL4	SDC2	0.0060132	0	ANGPTL4_SDC2	ANGPTL4 - SDC2	ANGPTL	Secreted Signaling	PMID: 29017031
ClusterAstrocytes	ClusterImmature	ANGPTL4	SDC2	0.00477563	0	ANGPTL4_SDC2	ANGPTL4 - SDC2	ANGPTL	Secreted Signaling	PMID: 29017031
ClusterEndothelial	ClusterImmature	ANGPTL4	SDC2	0.000781958	0	ANGPTL4_SDC2	ANGPTL4 - SDC2	ANGPTL	Secreted Signaling	PMID: 29017031
ClusterEpendymal	ClusterImmature	ANGPTL4	SDC2	0.00069008	0	ANGPTL4_SDC2	ANGPTL4 - SDC2	ANGPTL	Secreted Signaling	PMID: 29017031
ClusterNeural Stem	ClusterImmature	ANGPTL4	SDC2	0.00185486	0	ANGPTL4_SDC2	ANGPTL4 - SDC2	ANGPTL	Secreted Signaling	PMID: 29017031
ClusterAstrocytes	ClusterNeural Stem	ANGPTL4	SDC2	0.0116296	0	ANGPTL4_SDC2	ANGPTL4 - SDC2	ANGPTL	Secreted Signaling	PMID: 29017031
ClusterEndothelial	ClusterNeural Stem	ANGPTL4	SDC2	0.00191525	0	ANGPTL4_SDC2	ANGPTL4 - SDC2	ANGPTL	Secreted Signaling	PMID: 29017031
ClusterEpendymal	ClusterNeural Stem	ANGPTL4	SDC2	0.00169044	0	ANGPTL4_SDC2	ANGPTL4 - SDC2	ANGPTL	Secreted Signaling	PMID: 29017031
ClusterNeural Stem	ClusterNeural Stem	ANGPTL4	SDC2	0.00453606	0	ANGPTL4_SDC2	ANGPTL4 - SDC2	ANGPTL	Secreted Signaling	PMID: 29017031
ClusterAstrocytes	ClustermGC	ANGPTL4	SDC2	0.00404319	0	ANGPTL4_SDC2	ANGPTL4 - SDC2	ANGPTL	Secreted Signaling	PMID: 29017031
ClusterEndothelial	ClustermGC	ANGPTL4	SDC2	0.00066162	0	ANGPTL4_SDC2	ANGPTL4 - SDC2	ANGPTL	Secreted Signaling	PMID: 29017031
ClusterEpendymal	ClustermGC	ANGPTL4	SDC2	0.000583873	0	ANGPTL4_SDC2	ANGPTL4 - SDC2	ANGPTL	Secreted Signaling	PMID: 29017031
ClusterNeural Stem	ClustermGC	ANGPTL4	SDC2	0.00156967	0	ANGPTL4_SDC2	ANGPTL4 - SDC2	ANGPTL	Secreted Signaling	PMID: 29017031
ClusterAstrocytes	ClusterOPCs	ANGPTL4	SDC3	0.00919839	0	ANGPTL4_SDC3	ANGPTL4 - SDC3	ANGPTL	Secreted Signaling	PMID: 29017031
ClusterEndothelial	ClusterOPCs	ANGPTL4	SDC3	0.00151175	0	ANGPTL4_SDC3	ANGPTL4 - SDC3	ANGPTL	Secreted Signaling	PMID: 29017031
ClusterEpendymal	ClusterOPCs	ANGPTL4	SDC3	0.00133424	0	ANGPTL4_SDC3	ANGPTL4 - SDC3	ANGPTL	Secreted Signaling	PMID: 29017031
ClusterNeural Stem	ClusterOPCs	ANGPTL4	SDC3	0.0035824	0	ANGPTL4_SDC3	ANGPTL4 - SDC3	ANGPTL	Secreted Signaling	PMID: 29017031
ClusterAstrocytes	ClusterAstrocytes	ANGPTL4	SDC4	0.00950848	0	ANGPTL4_SDC4	ANGPTL4 - SDC4	ANGPTL	Secreted Signaling	PMID: 29017031
ClusterEndothelial	ClusterAstrocytes	ANGPTL4	SDC4	0.00156313	0	ANGPTL4_SDC4	ANGPTL4 - SDC4	ANGPTL	Secreted Signaling	PMID: 29017031
ClusterEpendymal	ClusterAstrocytes	ANGPTL4	SDC4	0.00137959	0	ANGPTL4_SDC4	ANGPTL4 - SDC4	ANGPTL	Secreted Signaling	PMID: 29017031
ClusterNeural Stem	ClusterAstrocytes	ANGPTL4	SDC4	0.00370388	0	ANGPTL4_SDC4	ANGPTL4 - SDC4	ANGPTL	Secreted Signaling	PMID: 29017031
ClusterAstrocytes	ClusterEpendymal	ANGPTL4	SDC4	0.0037837	0	ANGPTL4_SDC4	ANGPTL4 - SDC4	ANGPTL	Secreted Signaling	PMID: 29017031
ClusterEndothelial	ClusterEpendymal	ANGPTL4	SDC4	0.000619023	0	ANGPTL4_SDC4	ANGPTL4 - SDC4	ANGPTL	Secreted Signaling	PMID: 29017031
ClusterEpendymal	ClusterEpendymal	ANGPTL4	SDC4	0.000546279	0	ANGPTL4_SDC4	ANGPTL4 - SDC4	ANGPTL	Secreted Signaling	PMID: 29017031
ClusterNeural Stem	ClusterEpendymal	ANGPTL4	SDC4	0.0014687	0	ANGPTL4_SDC4	ANGPTL4 - SDC4	ANGPTL	Secreted Signaling	PMID: 29017031
ClusterAstrocytes	ClusterNeural Stem	ANGPTL4	SDC4	0.0114676	0	ANGPTL4_SDC4	ANGPTL4 - SDC4	ANGPTL	Secreted Signaling	PMID: 29017031
ClusterEndothelial	ClusterNeural Stem	ANGPTL4	SDC4	0.00188831	0	ANGPTL4_SDC4	ANGPTL4 - SDC4	ANGPTL	Secreted Signaling	PMID: 29017031
ClusterEpendymal	ClusterNeural Stem	ANGPTL4	SDC4	0.00166666	0	ANGPTL4_SDC4	ANGPTL4 - SDC4	ANGPTL	Secreted Signaling	PMID: 29017031
ClusterNeural Stem	ClusterNeural Stem	ANGPTL4	SDC4	0.00447242	0	ANGPTL4_SDC4	ANGPTL4 - SDC4	ANGPTL	Secreted Signaling	PMID: 29017031
ClusterAstrocytes	ClusterEndothelial	ANGPT1	TEK	0.0110349	0	ANGPT1_TEK	ANGPT1 - TEK	ANGPT	Secreted Signaling	PMID: 20651738
ClusterEpendymal	ClusterEndothelial	ANGPT1	TEK	0.00792965	0	ANGPT1_TEK	ANGPT1 - TEK	ANGPT	Secreted Signaling	PMID: 20651738
ClusterNeural Stem	ClusterEndothelial	ANGPT1	TEK	0.010628	0	ANGPT1_TEK	ANGPT1 - TEK	ANGPT	Secreted Signaling	PMID: 20651738
ClusterAstrocytes	ClusterOPCs	ANGPT1	TEK	0.0130176	0	ANGPT1_TEK	ANGPT1 - TEK	ANGPT	Secreted Signaling	PMID: 20651738
ClusterEpendymal	ClusterOPCs	ANGPT1	TEK	0.00935969	0	ANGPT1_TEK	ANGPT1 - TEK	ANGPT	Secreted Signaling	PMID: 20651738
ClusterNeural Stem	ClusterOPCs	ANGPT1	TEK	0.0125385	0	ANGPT1_TEK	ANGPT1 - TEK	ANGPT	Secreted Signaling	PMID: 20651738
ClusterCA2-4_neurons	ClusterEndothelial	ANGPT2	TEK	0.000435198	0	ANGPT2_TEK	ANGPT2 - TEK	ANGPT	Secreted Signaling	PMID: 20651738
ClusterEndothelial	ClusterEndothelial	ANGPT2	TEK	0.00293348	0	ANGPT2_TEK	ANGPT2 - TEK	ANGPT	Secreted Signaling	PMID: 20651738
ClusterImmature	ClusterEndothelial	ANGPT2	TEK	0.000672998	0	ANGPT2_TEK	ANGPT2 - TEK	ANGPT	Secreted Signaling	PMID: 20651738
ClusterCA2-4_neurons	ClusterOPCs	ANGPT2	TEK	0.000514382	0	ANGPT2_TEK	ANGPT2 - TEK	ANGPT	Secreted Signaling	PMID: 20651738
ClusterEndothelial	ClusterOPCs	ANGPT2	TEK	0.00346565	0	ANGPT2_TEK	ANGPT2 - TEK	ANGPT	Secreted Signaling	PMID: 20651738
ClusterImmature	ClusterOPCs	ANGPT2	TEK	0.000795416	0	ANGPT2_TEK	ANGPT2 - TEK	ANGPT	Secreted Signaling	PMID: 20651738
ClusterAstrocytes	ClusterAstrocytes	PTN	PTPRZ1	0.0695246	0	PTN_PTPRZ1	PTN - PTPRZ1	PTN	Secreted Signaling	PMID: 28356350; PMID: 25620911
ClusterEndothelial	ClusterAstrocytes	PTN	PTPRZ1	0.0871078	0	PTN_PTPRZ1	PTN - PTPRZ1	PTN	Secreted Signaling	PMID: 28356350; PMID: 25620911
ClusterEpendymal	ClusterAstrocytes	PTN	PTPRZ1	0.0383705	0	PTN_PTPRZ1	PTN - PTPRZ1	PTN	Secreted Signaling	PMID: 28356350; PMID: 25620911
ClusterNeural Stem	ClusterAstrocytes	PTN	PTPRZ1	0.0975577	0	PTN_PTPRZ1	PTN - PTPRZ1	PTN	Secreted Signaling	PMID: 28356350; PMID: 25620911
ClusterNeuroblast	ClusterAstrocytes	PTN	PTPRZ1	0.0383127	0	PTN_PTPRZ1	PTN - PTPRZ1	PTN	Secreted Signaling	PMID: 28356350; PMID: 25620911
ClusterOPCs	ClusterAstrocytes	PTN	PTPRZ1	0.142703	0	PTN_PTPRZ1	PTN - PTPRZ1	PTN	Secreted Signaling	PMID: 28356350; PMID: 25620911
ClustermOli	ClusterAstrocytes	PTN	PTPRZ1	0.0918576	0	PTN_PTPRZ1	PTN - PTPRZ1	PTN	Secreted Signaling	PMID: 28356350; PMID: 25620911
ClusterAstrocytes	ClusterCA2-4_neurons	PTN	PTPRZ1	0.00926483	0.04	PTN_PTPRZ1	PTN - PTPRZ1	PTN	Secreted Signaling	PMID: 28356350; PMID: 25620911
ClusterEndothelial	ClusterCA2-4_neurons	PTN	PTPRZ1	0.0118012	0	PTN_PTPRZ1	PTN - PTPRZ1	PTN	Secreted Signaling	PMID: 28356350; PMID: 25620911
ClusterNeural Stem	ClusterCA2-4_neurons	PTN	PTPRZ1	0.0133491	0	PTN_PTPRZ1	PTN - PTPRZ1	PTN	Secreted Signaling	PMID: 28356350; PMID: 25620911
ClusterOPCs	ClusterCA2-4_neurons	PTN	PTPRZ1	0.0204076	0	PTN_PTPRZ1	PTN - PTPRZ1	PTN	Secreted Signaling	PMID: 28356350; PMID: 25620911
ClustermOli	ClusterCA2-4_neurons	PTN	PTPRZ1	0.012501	0	PTN_PTPRZ1	PTN - PTPRZ1	PTN	Secreted Signaling	PMID: 28356350; PMID: 25620911
ClusterOPCs	ClusterEndothelial	PTN	PTPRZ1	0.0110826	0.01	PTN_PTPRZ1	PTN - PTPRZ1	PTN	Secreted Signaling	PMID: 28356350; PMID: 25620911
ClusterAstrocytes	ClusterEpendymal	PTN	PTPRZ1	0.0505251	0	PTN_PTPRZ1	PTN - PTPRZ1	PTN	Secreted Signaling	PMID: 28356350; PMID: 25620911
ClusterEndothelial	ClusterEpendymal	PTN	PTPRZ1	0.0636318	0	PTN_PTPRZ1	PTN - PTPRZ1	PTN	Secreted Signaling	PMID: 28356350; PMID: 25620911
ClusterEpendymal	ClusterEpendymal	PTN	PTPRZ1	0.0276319	0	PTN_PTPRZ1	PTN - PTPRZ1	PTN	Secreted Signaling	PMID: 28356350; PMID: 25620911
ClusterNeural Stem	ClusterEpendymal	PTN	PTPRZ1	0.0714859	0	PTN_PTPRZ1	PTN - PTPRZ1	PTN	Secreted Signaling	PMID: 28356350; PMID: 25620911
ClusterNeuroblast	ClusterEpendymal	PTN	PTPRZ1	0.0275898	0	PTN_PTPRZ1	PTN - PTPRZ1	PTN	Secreted Signaling	PMID: 28356350; PMID: 25620911
ClusterOPCs	ClusterEpendymal	PTN	PTPRZ1	0.105983	0	PTN_PTPRZ1	PTN - PTPRZ1	PTN	Secreted Signaling	PMID: 28356350; PMID: 25620911
ClustermOli	ClusterEpendymal	PTN	PTPRZ1	0.0671957	0	PTN_PTPRZ1	PTN - PTPRZ1	PTN	Secreted Signaling	PMID: 28356350; PMID: 25620911
ClusterEndothelial	ClusterGABA_neurons	PTN	PTPRZ1	0.00924648	0	PTN_PTPRZ1	PTN - PTPRZ1	PTN	Secreted Signaling	PMID: 28356350; PMID: 25620911
ClusterNeural Stem	ClusterGABA_neurons	PTN	PTPRZ1	0.0104628	0	PTN_PTPRZ1	PTN - PTPRZ1	PTN	Secreted Signaling	PMID: 28356350; PMID: 25620911
ClusterOPCs	ClusterGABA_neurons	PTN	PTPRZ1	0.0160199	0	PTN_PTPRZ1	PTN - PTPRZ1	PTN	Secreted Signaling	PMID: 28356350; PMID: 25620911
ClustermOli	ClusterGABA_neurons	PTN	PTPRZ1	0.00979623	0	PTN_PTPRZ1	PTN - PTPRZ1	PTN	Secreted Signaling	PMID: 28356350; PMID: 25620911
ClusterAstrocytes	ClusterImmature	PTN	PTPRZ1	0.0437829	0	PTN_PTPRZ1	PTN - PTPRZ1	PTN	Secreted Signaling	PMID: 28356350; PMID: 25620911
ClusterEndothelial	ClusterImmature	PTN	PTPRZ1	0.0552424	0	PTN_PTPRZ1	PTN - PTPRZ1	PTN	Secreted Signaling	PMID: 28356350; PMID: 25620911
ClusterEpendymal	ClusterImmature	PTN	PTPRZ1	0.0238678	0	PTN_PTPRZ1	PTN - PTPRZ1	PTN	Secreted Signaling	PMID: 28356350; PMID: 25620911
ClusterNeural Stem	ClusterImmature	PTN	PTPRZ1	0.0621297	0	PTN_PTPRZ1	PTN - PTPRZ1	PTN	Secreted Signaling	PMID: 28356350; PMID: 25620911
ClusterNeuroblast	ClusterImmature	PTN	PTPRZ1	0.0238314	0	PTN_PTPRZ1	PTN - PTPRZ1	PTN	Secreted Signaling	PMID: 28356350; PMID: 25620911
ClusterOPCs	ClusterImmature	PTN	PTPRZ1	0.0925619	0	PTN_PTPRZ1	PTN - PTPRZ1	PTN	Secreted Signaling	PMID: 28356350; PMID: 25620911
ClustermOli	ClusterImmature	PTN	PTPRZ1	0.0583658	0	PTN_PTPRZ1	PTN - PTPRZ1	PTN	Secreted Signaling	PMID: 28356350; PMID: 25620911
ClusterAstrocytes	ClusterNeural Stem	PTN	PTPRZ1	0.0714549	0	PTN_PTPRZ1	PTN - PTPRZ1	PTN	Secreted Signaling	PMID: 28356350; PMID: 25620911
ClusterEndothelial	ClusterNeural Stem	PTN	PTPRZ1	0.0894793	0	PTN_PTPRZ1	PTN - PTPRZ1	PTN	Secreted Signaling	PMID: 28356350; PMID: 25620911
ClusterEpendymal	ClusterNeural Stem	PTN	PTPRZ1	0.0394725	0	PTN_PTPRZ1	PTN - PTPRZ1	PTN	Secreted Signaling	PMID: 28356350; PMID: 25620911
ClusterNeural Stem	ClusterNeural Stem	PTN	PTPRZ1	0.100182	0	PTN_PTPRZ1	PTN - PTPRZ1	PTN	Secreted Signaling	PMID: 28356350; PMID: 25620911
ClusterNeuroblast	ClusterNeural Stem	PTN	PTPRZ1	0.0394131	0	PTN_PTPRZ1	PTN - PTPRZ1	PTN	Secreted Signaling	PMID: 28356350; PMID: 25620911
ClusterOPCs	ClusterNeural Stem	PTN	PTPRZ1	0.146345	0	PTN_PTPRZ1	PTN - PTPRZ1	PTN	Secreted Signaling	PMID: 28356350; PMID: 25620911
ClustermOli	ClusterNeural Stem	PTN	PTPRZ1	0.094345	0	PTN_PTPRZ1	PTN - PTPRZ1	PTN	Secreted Signaling	PMID: 28356350; PMID: 25620911
ClusterAstrocytes	ClusterOPCs	PTN	PTPRZ1	0.101413	0	PTN_PTPRZ1	PTN - PTPRZ1	PTN	Secreted Signaling	PMID: 28356350; PMID: 25620911
ClusterEndothelial	ClusterOPCs	PTN	PTPRZ1	0.125969	0	PTN_PTPRZ1	PTN - PTPRZ1	PTN	Secreted Signaling	PMID: 28356350; PMID: 25620911
ClusterEpendymal	ClusterOPCs	PTN	PTPRZ1	0.0568425	0	PTN_PTPRZ1	PTN - PTPRZ1	PTN	Secreted Signaling	PMID: 28356350; PMID: 25620911
ClusterNeural Stem	ClusterOPCs	PTN	PTPRZ1	0.140364	0	PTN_PTPRZ1	PTN - PTPRZ1	PTN	Secreted Signaling	PMID: 28356350; PMID: 25620911
ClusterNeuroblast	ClusterOPCs	PTN	PTPRZ1	0.0567585	0	PTN_PTPRZ1	PTN - PTPRZ1	PTN	Secreted Signaling	PMID: 28356350; PMID: 25620911
ClusterOPCs	ClusterOPCs	PTN	PTPRZ1	0.200908	0	PTN_PTPRZ1	PTN - PTPRZ1	PTN	Secreted Signaling	PMID: 28356350; PMID: 25620911
ClustermOli	ClusterOPCs	PTN	PTPRZ1	0.13253	0	PTN_PTPRZ1	PTN - PTPRZ1	PTN	Secreted Signaling	PMID: 28356350; PMID: 25620911
ClusterAstrocytes	ClustermGC	PTN	PTPRZ1	0.0511836	0	PTN_PTPRZ1	PTN - PTPRZ1	PTN	Secreted Signaling	PMID: 28356350; PMID: 25620911
ClusterEndothelial	ClustermGC	PTN	PTPRZ1	0.0644495	0	PTN_PTPRZ1	PTN - PTPRZ1	PTN	Secreted Signaling	PMID: 28356350; PMID: 25620911
ClusterEpendymal	ClustermGC	PTN	PTPRZ1	0.0280008	0	PTN_PTPRZ1	PTN - PTPRZ1	PTN	Secreted Signaling	PMID: 28356350; PMID: 25620911
ClusterNeural Stem	ClustermGC	PTN	PTPRZ1	0.0723967	0	PTN_PTPRZ1	PTN - PTPRZ1	PTN	Secreted Signaling	PMID: 28356350; PMID: 25620911
ClusterNeuroblast	ClustermGC	PTN	PTPRZ1	0.0279582	0	PTN_PTPRZ1	PTN - PTPRZ1	PTN	Secreted Signaling	PMID: 28356350; PMID: 25620911
ClusterOPCs	ClustermGC	PTN	PTPRZ1	0.107283	0	PTN_PTPRZ1	PTN - PTPRZ1	PTN	Secreted Signaling	PMID: 28356350; PMID: 25620911
ClustermOli	ClustermGC	PTN	PTPRZ1	0.0680559	0	PTN_PTPRZ1	PTN - PTPRZ1	PTN	Secreted Signaling	PMID: 28356350; PMID: 25620911
ClusterAstrocytes	ClusterAstrocytes	PTN	SDC2	0.00885607	0	PTN_SDC2	PTN - SDC2	PTN	Secreted Signaling	PMID: 28356350; PMID: 25620911
ClusterEndothelial	ClusterAstrocytes	PTN	SDC2	0.0112819	0	PTN_SDC2	PTN - SDC2	PTN	Secreted Signaling	PMID: 28356350; PMID: 25620911
ClusterEpendymal	ClusterAstrocytes	PTN	SDC2	0.0047489	0	PTN_SDC2	PTN - SDC2	PTN	Secreted Signaling	PMID: 28356350; PMID: 25620911
ClusterNeural Stem	ClusterAstrocytes	PTN	SDC2	0.0127625	0	PTN_SDC2	PTN - SDC2	PTN	Secreted Signaling	PMID: 28356350; PMID: 25620911
ClusterNeuroblast	ClusterAstrocytes	PTN	SDC2	0.0047415	0	PTN_SDC2	PTN - SDC2	PTN	Secreted Signaling	PMID: 28356350; PMID: 25620911
ClusterOPCs	ClusterAstrocytes	PTN	SDC2	0.0195169	0	PTN_SDC2	PTN - SDC2	PTN	Secreted Signaling	PMID: 28356350; PMID: 25620911
ClustermOli	ClusterAstrocytes	PTN	SDC2	0.0119512	0	PTN_SDC2	PTN - SDC2	PTN	Secreted Signaling	PMID: 28356350; PMID: 25620911
ClusterAstrocytes	ClusterEpendymal	PTN	SDC2	0.0116347	0	PTN_SDC2	PTN - SDC2	PTN	Secreted Signaling	PMID: 28356350; PMID: 25620911
ClusterEndothelial	ClusterEpendymal	PTN	SDC2	0.0148102	0	PTN_SDC2	PTN - SDC2	PTN	Secreted Signaling	PMID: 28356350; PMID: 25620911
ClusterEpendymal	ClusterEpendymal	PTN	SDC2	0.00624699	0	PTN_SDC2	PTN - SDC2	PTN	Secreted Signaling	PMID: 28356350; PMID: 25620911
ClusterNeural Stem	ClusterEpendymal	PTN	SDC2	0.016746	0	PTN_SDC2	PTN - SDC2	PTN	Secreted Signaling	PMID: 28356350; PMID: 25620911
ClusterNeuroblast	ClusterEpendymal	PTN	SDC2	0.00623726	0	PTN_SDC2	PTN - SDC2	PTN	Secreted Signaling	PMID: 28356350; PMID: 25620911
ClusterOPCs	ClusterEpendymal	PTN	SDC2	0.0255541	0	PTN_SDC2	PTN - SDC2	PTN	Secreted Signaling	PMID: 28356350; PMID: 25620911
ClustermOli	ClusterEpendymal	PTN	SDC2	0.0156855	0	PTN_SDC2	PTN - SDC2	PTN	Secreted Signaling	PMID: 28356350; PMID: 25620911
ClusterAstrocytes	ClusterImmature	PTN	SDC2	0.00360297	0	PTN_SDC2	PTN - SDC2	PTN	Secreted Signaling	PMID: 28356350; PMID: 25620911
ClusterEndothelial	ClusterImmature	PTN	SDC2	0.00459654	0	PTN_SDC2	PTN - SDC2	PTN	Secreted Signaling	PMID: 28356350; PMID: 25620911
ClusterEpendymal	ClusterImmature	PTN	SDC2	0.00192729	0	PTN_SDC2	PTN - SDC2	PTN	Secreted Signaling	PMID: 28356350; PMID: 25620911
ClusterNeural Stem	ClusterImmature	PTN	SDC2	0.0052044	0	PTN_SDC2	PTN - SDC2	PTN	Secreted Signaling	PMID: 28356350; PMID: 25620911
ClusterNeuroblast	ClusterImmature	PTN	SDC2	0.00192428	0	PTN_SDC2	PTN - SDC2	PTN	Secreted Signaling	PMID: 28356350; PMID: 25620911
ClusterOPCs	ClusterImmature	PTN	SDC2	0.00799118	0	PTN_SDC2	PTN - SDC2	PTN	Secreted Signaling	PMID: 28356350; PMID: 25620911
ClustermOli	ClusterImmature	PTN	SDC2	0.00487119	0	PTN_SDC2	PTN - SDC2	PTN	Secreted Signaling	PMID: 28356350; PMID: 25620911
ClusterAstrocytes	ClusterNeural Stem	PTN	SDC2	0.00878881	0	PTN_SDC2	PTN - SDC2	PTN	Secreted Signaling	PMID: 28356350; PMID: 25620911
ClusterEndothelial	ClusterNeural Stem	PTN	SDC2	0.0111964	0	PTN_SDC2	PTN - SDC2	PTN	Secreted Signaling	PMID: 28356350; PMID: 25620911
ClusterEpendymal	ClusterNeural Stem	PTN	SDC2	0.00471268	0	PTN_SDC2	PTN - SDC2	PTN	Secreted Signaling	PMID: 28356350; PMID: 25620911
ClusterNeural Stem	ClusterNeural Stem	PTN	SDC2	0.0126659	0	PTN_SDC2	PTN - SDC2	PTN	Secreted Signaling	PMID: 28356350; PMID: 25620911
ClusterNeuroblast	ClusterNeural Stem	PTN	SDC2	0.00470534	0	PTN_SDC2	PTN - SDC2	PTN	Secreted Signaling	PMID: 28356350; PMID: 25620911
ClusterOPCs	ClusterNeural Stem	PTN	SDC2	0.0193703	0	PTN_SDC2	PTN - SDC2	PTN	Secreted Signaling	PMID: 28356350; PMID: 25620911
ClustermOli	ClusterNeural Stem	PTN	SDC2	0.0118607	0	PTN_SDC2	PTN - SDC2	PTN	Secreted Signaling	PMID: 28356350; PMID: 25620911
ClusterAstrocytes	ClustermGC	PTN	SDC2	0.00304983	0	PTN_SDC2	PTN - SDC2	PTN	Secreted Signaling	PMID: 28356350; PMID: 25620911
ClusterEndothelial	ClustermGC	PTN	SDC2	0.00389146	0	PTN_SDC2	PTN - SDC2	PTN	Secreted Signaling	PMID: 28356350; PMID: 25620911
ClusterEpendymal	ClustermGC	PTN	SDC2	0.00163098	0	PTN_SDC2	PTN - SDC2	PTN	Secreted Signaling	PMID: 28356350; PMID: 25620911
ClusterNeural Stem	ClustermGC	PTN	SDC2	0.00440648	0	PTN_SDC2	PTN - SDC2	PTN	Secreted Signaling	PMID: 28356350; PMID: 25620911
ClusterNeuroblast	ClustermGC	PTN	SDC2	0.00162843	0	PTN_SDC2	PTN - SDC2	PTN	Secreted Signaling	PMID: 28356350; PMID: 25620911
ClusterOPCs	ClustermGC	PTN	SDC2	0.00676891	0	PTN_SDC2	PTN - SDC2	PTN	Secreted Signaling	PMID: 28356350; PMID: 25620911
ClustermOli	ClustermGC	PTN	SDC2	0.00412415	0	PTN_SDC2	PTN - SDC2	PTN	Secreted Signaling	PMID: 28356350; PMID: 25620911
ClusterAstrocytes	ClusterOPCs	PTN	SDC3	0.0069473	0	PTN_SDC3	PTN - SDC3	PTN	Secreted Signaling	PMID: 28356350; PMID: 25620911
ClusterEndothelial	ClusterOPCs	PTN	SDC3	0.00885492	0	PTN_SDC3	PTN - SDC3	PTN	Secreted Signaling	PMID: 28356350; PMID: 25620911
ClusterEpendymal	ClusterOPCs	PTN	SDC3	0.00372203	0	PTN_SDC3	PTN - SDC3	PTN	Secreted Signaling	PMID: 28356350; PMID: 25620911
ClusterNeural Stem	ClusterOPCs	PTN	SDC3	0.0100202	0	PTN_SDC3	PTN - SDC3	PTN	Secreted Signaling	PMID: 28356350; PMID: 25620911
ClusterNeuroblast	ClusterOPCs	PTN	SDC3	0.00371623	0	PTN_SDC3	PTN - SDC3	PTN	Secreted Signaling	PMID: 28356350; PMID: 25620911
ClusterOPCs	ClusterOPCs	PTN	SDC3	0.015346	0	PTN_SDC3	PTN - SDC3	PTN	Secreted Signaling	PMID: 28356350; PMID: 25620911
ClustermOli	ClusterOPCs	PTN	SDC3	0.00938161	0	PTN_SDC3	PTN - SDC3	PTN	Secreted Signaling	PMID: 28356350; PMID: 25620911
ClusterAstrocytes	ClusterAstrocytes	PTN	SDC4	0.00718205	0	PTN_SDC4	PTN - SDC4	PTN	Secreted Signaling	PMID: 28356350; PMID: 25620911
ClusterEndothelial	ClusterAstrocytes	PTN	SDC4	0.00915354	0	PTN_SDC4	PTN - SDC4	PTN	Secreted Signaling	PMID: 28356350; PMID: 25620911
ClusterEpendymal	ClusterAstrocytes	PTN	SDC4	0.00384823	0	PTN_SDC4	PTN - SDC4	PTN	Secreted Signaling	PMID: 28356350; PMID: 25620911
ClusterNeural Stem	ClusterAstrocytes	PTN	SDC4	0.0103577	0	PTN_SDC4	PTN - SDC4	PTN	Secreted Signaling	PMID: 28356350; PMID: 25620911
ClusterNeuroblast	ClusterAstrocytes	PTN	SDC4	0.00384222	0	PTN_SDC4	PTN - SDC4	PTN	Secreted Signaling	PMID: 28356350; PMID: 25620911
ClusterOPCs	ClusterAstrocytes	PTN	SDC4	0.01586	0	PTN_SDC4	PTN - SDC4	PTN	Secreted Signaling	PMID: 28356350; PMID: 25620911
ClustermOli	ClusterAstrocytes	PTN	SDC4	0.00969782	0	PTN_SDC4	PTN - SDC4	PTN	Secreted Signaling	PMID: 28356350; PMID: 25620911
ClusterAstrocytes	ClusterEpendymal	PTN	SDC4	0.00285391	0	PTN_SDC4	PTN - SDC4	PTN	Secreted Signaling	PMID: 28356350; PMID: 25620911
ClusterEndothelial	ClusterEpendymal	PTN	SDC4	0.00364167	0	PTN_SDC4	PTN - SDC4	PTN	Secreted Signaling	PMID: 28356350; PMID: 25620911
ClusterEpendymal	ClusterEpendymal	PTN	SDC4	0.00152607	0	PTN_SDC4	PTN - SDC4	PTN	Secreted Signaling	PMID: 28356350; PMID: 25620911
ClusterNeural Stem	ClusterEpendymal	PTN	SDC4	0.00412377	0	PTN_SDC4	PTN - SDC4	PTN	Secreted Signaling	PMID: 28356350; PMID: 25620911
ClusterNeuroblast	ClusterEpendymal	PTN	SDC4	0.00152368	0	PTN_SDC4	PTN - SDC4	PTN	Secreted Signaling	PMID: 28356350; PMID: 25620911
ClusterOPCs	ClusterEpendymal	PTN	SDC4	0.00633559	0	PTN_SDC4	PTN - SDC4	PTN	Secreted Signaling	PMID: 28356350; PMID: 25620911
ClustermOli	ClusterEpendymal	PTN	SDC4	0.00385948	0	PTN_SDC4	PTN - SDC4	PTN	Secreted Signaling	PMID: 28356350; PMID: 25620911
ClusterAstrocytes	ClusterNeural Stem	PTN	SDC4	0.00866602	0	PTN_SDC4	PTN - SDC4	PTN	Secreted Signaling	PMID: 28356350; PMID: 25620911
ClusterEndothelial	ClusterNeural Stem	PTN	SDC4	0.0110403	0	PTN_SDC4	PTN - SDC4	PTN	Secreted Signaling	PMID: 28356350; PMID: 25620911
ClusterEpendymal	ClusterNeural Stem	PTN	SDC4	0.00464658	0	PTN_SDC4	PTN - SDC4	PTN	Secreted Signaling	PMID: 28356350; PMID: 25620911
ClusterNeural Stem	ClusterNeural Stem	PTN	SDC4	0.0124896	0	PTN_SDC4	PTN - SDC4	PTN	Secreted Signaling	PMID: 28356350; PMID: 25620911
ClusterNeuroblast	ClusterNeural Stem	PTN	SDC4	0.00463933	0	PTN_SDC4	PTN - SDC4	PTN	Secreted Signaling	PMID: 28356350; PMID: 25620911
ClusterOPCs	ClusterNeural Stem	PTN	SDC4	0.0191025	0	PTN_SDC4	PTN - SDC4	PTN	Secreted Signaling	PMID: 28356350; PMID: 25620911
ClustermOli	ClusterNeural Stem	PTN	SDC4	0.0116955	0	PTN_SDC4	PTN - SDC4	PTN	Secreted Signaling	PMID: 28356350; PMID: 25620911
ClusterAstrocytes	ClusterCA2-4_neurons	PTN	NCL	0.00247463	0	PTN_NCL	PTN - NCL	PTN	Secreted Signaling	PMID: 28356350; PMID: 25620911
ClusterEndothelial	ClusterCA2-4_neurons	PTN	NCL	0.00315803	0	PTN_NCL	PTN - NCL	PTN	Secreted Signaling	PMID: 28356350; PMID: 25620911
ClusterEpendymal	ClusterCA2-4_neurons	PTN	NCL	0.00132302	0	PTN_NCL	PTN - NCL	PTN	Secreted Signaling	PMID: 28356350; PMID: 25620911
ClusterNeural Stem	ClusterCA2-4_neurons	PTN	NCL	0.00357633	0	PTN_NCL	PTN - NCL	PTN	Secreted Signaling	PMID: 28356350; PMID: 25620911
ClusterNeuroblast	ClusterCA2-4_neurons	PTN	NCL	0.00132095	0	PTN_NCL	PTN - NCL	PTN	Secreted Signaling	PMID: 28356350; PMID: 25620911
ClusterOPCs	ClusterCA2-4_neurons	PTN	NCL	0.00549615	0	PTN_NCL	PTN - NCL	PTN	Secreted Signaling	PMID: 28356350; PMID: 25620911
ClustermOli	ClusterCA2-4_neurons	PTN	NCL	0.00334701	0	PTN_NCL	PTN - NCL	PTN	Secreted Signaling	PMID: 28356350; PMID: 25620911
ClusterAstrocytes	ClusterCA_neurons	PTN	NCL	0.00214238	0	PTN_NCL	PTN - NCL	PTN	Secreted Signaling	PMID: 28356350; PMID: 25620911
ClusterEndothelial	ClusterCA_neurons	PTN	NCL	0.00273427	0	PTN_NCL	PTN - NCL	PTN	Secreted Signaling	PMID: 28356350; PMID: 25620911
ClusterEpendymal	ClusterCA_neurons	PTN	NCL	0.00114521	0	PTN_NCL	PTN - NCL	PTN	Secreted Signaling	PMID: 28356350; PMID: 25620911
ClusterNeural Stem	ClusterCA_neurons	PTN	NCL	0.00309662	0	PTN_NCL	PTN - NCL	PTN	Secreted Signaling	PMID: 28356350; PMID: 25620911
ClusterNeuroblast	ClusterCA_neurons	PTN	NCL	0.00114342	0	PTN_NCL	PTN - NCL	PTN	Secreted Signaling	PMID: 28356350; PMID: 25620911
ClusterOPCs	ClusterCA_neurons	PTN	NCL	0.00476016	0	PTN_NCL	PTN - NCL	PTN	Secreted Signaling	PMID: 28356350; PMID: 25620911
ClustermOli	ClusterCA_neurons	PTN	NCL	0.00289797	0	PTN_NCL	PTN - NCL	PTN	Secreted Signaling	PMID: 28356350; PMID: 25620911
ClusterAstrocytes	ClusterEndothelial	PTN	NCL	0.0174757	0	PTN_NCL	PTN - NCL	PTN	Secreted Signaling	PMID: 28356350; PMID: 25620911
ClusterEndothelial	ClusterEndothelial	PTN	NCL	0.0222096	0	PTN_NCL	PTN - NCL	PTN	Secreted Signaling	PMID: 28356350; PMID: 25620911
ClusterEpendymal	ClusterEndothelial	PTN	NCL	0.00940895	0	PTN_NCL	PTN - NCL	PTN	Secreted Signaling	PMID: 28356350; PMID: 25620911
ClusterNeural Stem	ClusterEndothelial	PTN	NCL	0.0250879	0	PTN_NCL	PTN - NCL	PTN	Secreted Signaling	PMID: 28356350; PMID: 25620911
ClusterNeuroblast	ClusterEndothelial	PTN	NCL	0.00939435	0	PTN_NCL	PTN - NCL	PTN	Secreted Signaling	PMID: 28356350; PMID: 25620911
ClusterOPCs	ClusterEndothelial	PTN	NCL	0.0381137	0	PTN_NCL	PTN - NCL	PTN	Secreted Signaling	PMID: 28356350; PMID: 25620911
ClustermOli	ClusterEndothelial	PTN	NCL	0.0235118	0	PTN_NCL	PTN - NCL	PTN	Secreted Signaling	PMID: 28356350; PMID: 25620911
ClusterAstrocytes	ClusterEpendymal	PTN	NCL	0.0122907	0	PTN_NCL	PTN - NCL	PTN	Secreted Signaling	PMID: 28356350; PMID: 25620911
ClusterEndothelial	ClusterEpendymal	PTN	NCL	0.0156424	0	PTN_NCL	PTN - NCL	PTN	Secreted Signaling	PMID: 28356350; PMID: 25620911
ClusterEpendymal	ClusterEpendymal	PTN	NCL	0.00660126	0	PTN_NCL	PTN - NCL	PTN	Secreted Signaling	PMID: 28356350; PMID: 25620911
ClusterNeural Stem	ClusterEpendymal	PTN	NCL	0.0176851	0	PTN_NCL	PTN - NCL	PTN	Secreted Signaling	PMID: 28356350; PMID: 25620911
ClusterNeuroblast	ClusterEpendymal	PTN	NCL	0.00659099	0	PTN_NCL	PTN - NCL	PTN	Secreted Signaling	PMID: 28356350; PMID: 25620911
ClusterOPCs	ClusterEpendymal	PTN	NCL	0.0269736	0	PTN_NCL	PTN - NCL	PTN	Secreted Signaling	PMID: 28356350; PMID: 25620911
ClustermOli	ClusterEpendymal	PTN	NCL	0.0165661	0	PTN_NCL	PTN - NCL	PTN	Secreted Signaling	PMID: 28356350; PMID: 25620911
ClusterAstrocytes	ClusterGABA_neurons	PTN	NCL	0.00352188	0	PTN_NCL	PTN - NCL	PTN	Secreted Signaling	PMID: 28356350; PMID: 25620911
ClusterEndothelial	ClusterGABA_neurons	PTN	NCL	0.00449319	0	PTN_NCL	PTN - NCL	PTN	Secreted Signaling	PMID: 28356350; PMID: 25620911
ClusterEpendymal	ClusterGABA_neurons	PTN	NCL	0.00188384	0	PTN_NCL	PTN - NCL	PTN	Secreted Signaling	PMID: 28356350; PMID: 25620911
ClusterNeural Stem	ClusterGABA_neurons	PTN	NCL	0.00508745	0	PTN_NCL	PTN - NCL	PTN	Secreted Signaling	PMID: 28356350; PMID: 25620911
ClusterNeuroblast	ClusterGABA_neurons	PTN	NCL	0.00188089	0	PTN_NCL	PTN - NCL	PTN	Secreted Signaling	PMID: 28356350; PMID: 25620911
ClusterOPCs	ClusterGABA_neurons	PTN	NCL	0.00781209	0	PTN_NCL	PTN - NCL	PTN	Secreted Signaling	PMID: 28356350; PMID: 25620911
ClustermOli	ClusterGABA_neurons	PTN	NCL	0.00476169	0	PTN_NCL	PTN - NCL	PTN	Secreted Signaling	PMID: 28356350; PMID: 25620911
ClusterAstrocytes	ClusterImmature	PTN	NCL	0.011671	0	PTN_NCL	PTN - NCL	PTN	Secreted Signaling	PMID: 28356350; PMID: 25620911
ClusterEndothelial	ClusterImmature	PTN	NCL	0.0148562	0	PTN_NCL	PTN - NCL	PTN	Secreted Signaling	PMID: 28356350; PMID: 25620911
ClusterEpendymal	ClusterImmature	PTN	NCL	0.00626659	0	PTN_NCL	PTN - NCL	PTN	Secreted Signaling	PMID: 28356350; PMID: 25620911
ClusterNeural Stem	ClusterImmature	PTN	NCL	0.0167979	0	PTN_NCL	PTN - NCL	PTN	Secreted Signaling	PMID: 28356350; PMID: 25620911
ClusterNeuroblast	ClusterImmature	PTN	NCL	0.00625684	0	PTN_NCL	PTN - NCL	PTN	Secreted Signaling	PMID: 28356350; PMID: 25620911
ClusterOPCs	ClusterImmature	PTN	NCL	0.0256327	0	PTN_NCL	PTN - NCL	PTN	Secreted Signaling	PMID: 28356350; PMID: 25620911
ClustermOli	ClusterImmature	PTN	NCL	0.0157342	0	PTN_NCL	PTN - NCL	PTN	Secreted Signaling	PMID: 28356350; PMID: 25620911
ClusterAstrocytes	ClusterNeuroblast	PTN	NCL	0.00933485	0	PTN_NCL	PTN - NCL	PTN	Secreted Signaling	PMID: 28356350; PMID: 25620911
ClusterEndothelial	ClusterNeuroblast	PTN	NCL	0.0118902	0	PTN_NCL	PTN - NCL	PTN	Secreted Signaling	PMID: 28356350; PMID: 25620911
ClusterEpendymal	ClusterNeuroblast	PTN	NCL	0.00500676	0	PTN_NCL	PTN - NCL	PTN	Secreted Signaling	PMID: 28356350; PMID: 25620911
ClusterNeural Stem	ClusterNeuroblast	PTN	NCL	0.0134496	0	PTN_NCL	PTN - NCL	PTN	Secreted Signaling	PMID: 28356350; PMID: 25620911
ClusterNeuroblast	ClusterNeuroblast	PTN	NCL	0.00499896	0	PTN_NCL	PTN - NCL	PTN	Secreted Signaling	PMID: 28356350; PMID: 25620911
ClusterOPCs	ClusterNeuroblast	PTN	NCL	0.0205601	0	PTN_NCL	PTN - NCL	PTN	Secreted Signaling	PMID: 28356350; PMID: 25620911
ClustermOli	ClusterNeuroblast	PTN	NCL	0.0125951	0	PTN_NCL	PTN - NCL	PTN	Secreted Signaling	PMID: 28356350; PMID: 25620911
ClusterAstrocytes	ClustermGC	PTN	NCL	0.00374358	0	PTN_NCL	PTN - NCL	PTN	Secreted Signaling	PMID: 28356350; PMID: 25620911
ClusterEndothelial	ClustermGC	PTN	NCL	0.00477574	0	PTN_NCL	PTN - NCL	PTN	Secreted Signaling	PMID: 28356350; PMID: 25620911
ClusterEpendymal	ClustermGC	PTN	NCL	0.00200263	0	PTN_NCL	PTN - NCL	PTN	Secreted Signaling	PMID: 28356350; PMID: 25620911
ClusterNeural Stem	ClustermGC	PTN	NCL	0.00540716	0	PTN_NCL	PTN - NCL	PTN	Secreted Signaling	PMID: 28356350; PMID: 25620911
ClusterNeuroblast	ClustermGC	PTN	NCL	0.0019995	0	PTN_NCL	PTN - NCL	PTN	Secreted Signaling	PMID: 28356350; PMID: 25620911
ClusterOPCs	ClustermGC	PTN	NCL	0.0083016	0	PTN_NCL	PTN - NCL	PTN	Secreted Signaling	PMID: 28356350; PMID: 25620911
ClustermOli	ClustermGC	PTN	NCL	0.00506104	0	PTN_NCL	PTN - NCL	PTN	Secreted Signaling	PMID: 28356350; PMID: 25620911
ClusterAstrocytes	ClusterAstrocytes	PTN	ALK	0.00531053	0	PTN_ALK	PTN - ALK	PTN	Secreted Signaling	PMID: 28356350; PMID: 25620911
ClusterEndothelial	ClusterAstrocytes	PTN	ALK	0.00677178	0	PTN_ALK	PTN - ALK	PTN	Secreted Signaling	PMID: 28356350; PMID: 25620911
ClusterEpendymal	ClusterAstrocytes	PTN	ALK	0.00284295	0	PTN_ALK	PTN - ALK	PTN	Secreted Signaling	PMID: 28356350; PMID: 25620911
ClusterNeural Stem	ClusterAstrocytes	PTN	ALK	0.00766508	0	PTN_ALK	PTN - ALK	PTN	Secreted Signaling	PMID: 28356350; PMID: 25620911
ClusterNeuroblast	ClusterAstrocytes	PTN	ALK	0.00283851	0	PTN_ALK	PTN - ALK	PTN	Secreted Signaling	PMID: 28356350; PMID: 25620911
ClusterOPCs	ClusterAstrocytes	PTN	ALK	0.0117539	0	PTN_ALK	PTN - ALK	PTN	Secreted Signaling	PMID: 28356350; PMID: 25620911
ClustermOli	ClusterAstrocytes	PTN	ALK	0.00717547	0	PTN_ALK	PTN - ALK	PTN	Secreted Signaling	PMID: 28356350; PMID: 25620911
ClusterAstrocytes	ClusterEpendymal	PTN	ALK	0.00367371	0	PTN_ALK	PTN - ALK	PTN	Secreted Signaling	PMID: 28356350; PMID: 25620911
ClusterEndothelial	ClusterEpendymal	PTN	ALK	0.00468669	0	PTN_ALK	PTN - ALK	PTN	Secreted Signaling	PMID: 28356350; PMID: 25620911
ClusterEpendymal	ClusterEpendymal	PTN	ALK	0.00196519	0	PTN_ALK	PTN - ALK	PTN	Secreted Signaling	PMID: 28356350; PMID: 25620911
ClusterNeural Stem	ClusterEpendymal	PTN	ALK	0.00530641	0	PTN_ALK	PTN - ALK	PTN	Secreted Signaling	PMID: 28356350; PMID: 25620911
ClusterNeuroblast	ClusterEpendymal	PTN	ALK	0.00196212	0	PTN_ALK	PTN - ALK	PTN	Secreted Signaling	PMID: 28356350; PMID: 25620911
ClusterOPCs	ClusterEpendymal	PTN	ALK	0.00814736	0	PTN_ALK	PTN - ALK	PTN	Secreted Signaling	PMID: 28356350; PMID: 25620911
ClustermOli	ClusterEpendymal	PTN	ALK	0.0049667	0	PTN_ALK	PTN - ALK	PTN	Secreted Signaling	PMID: 28356350; PMID: 25620911
ClusterAstrocytes	ClusterGABA_neurons	PTN	ALK	0.0229421	0	PTN_ALK	PTN - ALK	PTN	Secreted Signaling	PMID: 28356350; PMID: 25620911
ClusterEndothelial	ClusterGABA_neurons	PTN	ALK	0.0291129	0	PTN_ALK	PTN - ALK	PTN	Secreted Signaling	PMID: 28356350; PMID: 25620911
ClusterEpendymal	ClusterGABA_neurons	PTN	ALK	0.0123839	0	PTN_ALK	PTN - ALK	PTN	Secreted Signaling	PMID: 28356350; PMID: 25620911
ClusterNeural Stem	ClusterGABA_neurons	PTN	ALK	0.0328558	0	PTN_ALK	PTN - ALK	PTN	Secreted Signaling	PMID: 28356350; PMID: 25620911
ClusterNeuroblast	ClusterGABA_neurons	PTN	ALK	0.0123647	0	PTN_ALK	PTN - ALK	PTN	Secreted Signaling	PMID: 28356350; PMID: 25620911
ClusterOPCs	ClusterGABA_neurons	PTN	ALK	0.0497092	0	PTN_ALK	PTN - ALK	PTN	Secreted Signaling	PMID: 28356350; PMID: 25620911
ClustermOli	ClusterGABA_neurons	PTN	ALK	0.0308071	0	PTN_ALK	PTN - ALK	PTN	Secreted Signaling	PMID: 28356350; PMID: 25620911
ClusterAstrocytes	ClusterOPCs	PTN	ALK	0.0309587	0	PTN_ALK	PTN - ALK	PTN	Secreted Signaling	PMID: 28356350; PMID: 25620911
ClusterEndothelial	ClusterOPCs	PTN	ALK	0.0391992	0	PTN_ALK	PTN - ALK	PTN	Secreted Signaling	PMID: 28356350; PMID: 25620911
ClusterEpendymal	ClusterOPCs	PTN	ALK	0.0167745	0	PTN_ALK	PTN - ALK	PTN	Secreted Signaling	PMID: 28356350; PMID: 25620911
ClusterNeural Stem	ClusterOPCs	PTN	ALK	0.0441799	0	PTN_ALK	PTN - ALK	PTN	Secreted Signaling	PMID: 28356350; PMID: 25620911
ClusterNeuroblast	ClusterOPCs	PTN	ALK	0.0167487	0	PTN_ALK	PTN - ALK	PTN	Secreted Signaling	PMID: 28356350; PMID: 25620911
ClusterOPCs	ClusterOPCs	PTN	ALK	0.0664428	0	PTN_ALK	PTN - ALK	PTN	Secreted Signaling	PMID: 28356350; PMID: 25620911
ClustermOli	ClusterOPCs	PTN	ALK	0.0414553	0	PTN_ALK	PTN - ALK	PTN	Secreted Signaling	PMID: 28356350; PMID: 25620911
ClusterImmature	ClusterAstrocytes	POSTN	ITGAV_ITGB5	0.00330748	0	POSTN_ITGAV_ITGB5	POSTN - (ITGAV+ITGB5)	PERIOSTIN	Secreted Signaling	PMID: 26721738
ClusterImmature	ClusterEndothelial	POSTN	ITGAV_ITGB5	0.00554738	0	POSTN_ITGAV_ITGB5	POSTN - (ITGAV+ITGB5)	PERIOSTIN	Secreted Signaling	PMID: 26721738
ClusterImmature	ClusterEpendymal	POSTN	ITGAV_ITGB5	0.00659588	0	POSTN_ITGAV_ITGB5	POSTN - (ITGAV+ITGB5)	PERIOSTIN	Secreted Signaling	PMID: 26721738
ClusterImmature	ClusterImmature	POSTN	ITGAV_ITGB5	0.00278419	0	POSTN_ITGAV_ITGB5	POSTN - (ITGAV+ITGB5)	PERIOSTIN	Secreted Signaling	PMID: 26721738
ClusterImmature	ClusterNeural Stem	POSTN	ITGAV_ITGB5	0.00318618	0	POSTN_ITGAV_ITGB5	POSTN - (ITGAV+ITGB5)	PERIOSTIN	Secreted Signaling	PMID: 26721738
ClusterImmature	ClustermGC	POSTN	ITGAV_ITGB5	0.00298668	0	POSTN_ITGAV_ITGB5	POSTN - (ITGAV+ITGB5)	PERIOSTIN	Secreted Signaling	PMID: 26721738
ClusterEpendymal	ClusterEpendymal	C5	C5AR1	0.000526751	0	HC_C5AR1	HC - C5AR1	COMPLEMENT	Secreted Signaling	KEGG: hsa04080
ClusterEndothelial	ClusterAstrocytes	EDN1	EDNRB	0.00265541	0	EDN1_EDNRB	EDN1 - EDNRB	EDN	Secreted Signaling	KEGG: hsa04080
ClusterEndothelial	ClusterEpendymal	EDN1	EDNRB	0.000991061	0	EDN1_EDNRB	EDN1 - EDNRB	EDN	Secreted Signaling	KEGG: hsa04080
ClusterEndothelial	ClusterNeural Stem	EDN1	EDNRB	0.00155644	0	EDN1_EDNRB	EDN1 - EDNRB	EDN	Secreted Signaling	KEGG: hsa04080
ClusterImmature	ClusterCA_neurons	PDYN	OPRD1	0.000377877	0	PDYN_OPRD1	PDYN - OPRD1	OPIOID	Secreted Signaling	KEGG: hsa04080
ClusterImmature	ClusterImmature	PDYN	OPRD1	0.000596791	0	PDYN_OPRD1	PDYN - OPRD1	OPIOID	Secreted Signaling	KEGG: hsa04080
ClusterImmature	ClustermGC	PDYN	OPRD1	0.000649626	0	PDYN_OPRD1	PDYN - OPRD1	OPIOID	Secreted Signaling	KEGG: hsa04080
ClusterImmature	ClusterImmature	PDYN	OPRK1	0.000376647	0	PDYN_OPRK1	PDYN - OPRK1	OPIOID	Secreted Signaling	KEGG: hsa04080
ClusterImmature	ClusterCA_neurons	PDYN	OPRM1	0.000256355	0	PDYN_OPRM1	PDYN - OPRM1	OPIOID	Secreted Signaling	KEGG: hsa04080
ClusterImmature	ClusterGABA_neurons	PDYN	OPRM1	0.000623753	0	PDYN_OPRM1	PDYN - OPRM1	OPIOID	Secreted Signaling	KEGG: hsa04080
ClusterCA2-4_neurons	ClusterAstrocytes	PRSS3	PARD3	0.00490579	0	PRSS3_PARD3	PRSS3 - PARD3	PARs	Secreted Signaling	KEGG: hsa04080
ClusterCA2-4_neurons	ClusterCA2-4_neurons	PRSS3	PARD3	0.000325907	0	PRSS3_PARD3	PRSS3 - PARD3	PARs	Secreted Signaling	KEGG: hsa04080
ClusterCA2-4_neurons	ClusterCA_neurons	PRSS3	PARD3	0.000204797	0	PRSS3_PARD3	PRSS3 - PARD3	PARs	Secreted Signaling	KEGG: hsa04080
ClusterCA2-4_neurons	ClusterEndothelial	PRSS3	PARD3	0.00328055	0	PRSS3_PARD3	PRSS3 - PARD3	PARs	Secreted Signaling	KEGG: hsa04080
ClusterCA2-4_neurons	ClusterEpendymal	PRSS3	PARD3	0.00419047	0	PRSS3_PARD3	PRSS3 - PARD3	PARs	Secreted Signaling	KEGG: hsa04080
ClusterCA2-4_neurons	ClusterGABA_neurons	PRSS3	PARD3	0.00169154	0	PRSS3_PARD3	PRSS3 - PARD3	PARs	Secreted Signaling	KEGG: hsa04080
ClusterCA2-4_neurons	ClusterImmature	PRSS3	PARD3	0.00458517	0	PRSS3_PARD3	PRSS3 - PARD3	PARs	Secreted Signaling	KEGG: hsa04080
ClusterCA2-4_neurons	ClusterNeural Stem	PRSS3	PARD3	0.00502531	0	PRSS3_PARD3	PRSS3 - PARD3	PARs	Secreted Signaling	KEGG: hsa04080
ClusterCA2-4_neurons	ClusterOPCs	PRSS3	PARD3	0.00376446	0	PRSS3_PARD3	PRSS3 - PARD3	PARs	Secreted Signaling	KEGG: hsa04080
ClusterCA2-4_neurons	ClustermGC	PRSS3	PARD3	0.00474268	0	PRSS3_PARD3	PRSS3 - PARD3	PARs	Secreted Signaling	KEGG: hsa04080
ClusterCA_neurons	ClusterCA2-4_neurons	KITLG	KIT	0.00773262	0	KITL_KIT	KITL - KIT	KIT	Secreted Signaling	KEGG: hsa04080
ClusterEndothelial	ClusterCA2-4_neurons	KITLG	KIT	0.00365539	0	KITL_KIT	KITL - KIT	KIT	Secreted Signaling	KEGG: hsa04080
ClusterEpendymal	ClusterCA2-4_neurons	KITLG	KIT	0.00881905	0	KITL_KIT	KITL - KIT	KIT	Secreted Signaling	KEGG: hsa04080
ClusterGABA_neurons	ClusterCA2-4_neurons	KITLG	KIT	0.00474107	0	KITL_KIT	KITL - KIT	KIT	Secreted Signaling	KEGG: hsa04080
ClusterCA_neurons	ClusterCA_neurons	KITLG	KIT	0.00129814	0	KITL_KIT	KITL - KIT	KIT	Secreted Signaling	KEGG: hsa04080
ClusterEndothelial	ClusterCA_neurons	KITLG	KIT	0.000611567	0	KITL_KIT	KITL - KIT	KIT	Secreted Signaling	KEGG: hsa04080
ClusterEpendymal	ClusterCA_neurons	KITLG	KIT	0.00148187	0	KITL_KIT	KITL - KIT	KIT	Secreted Signaling	KEGG: hsa04080
ClusterGABA_neurons	ClusterCA_neurons	KITLG	KIT	0.000793929	0	KITL_KIT	KITL - KIT	KIT	Secreted Signaling	KEGG: hsa04080
ClusterCA_neurons	ClusterGABA_neurons	KITLG	KIT	0.000953435	0	KITL_KIT	KITL - KIT	KIT	Secreted Signaling	KEGG: hsa04080
ClusterEndothelial	ClusterGABA_neurons	KITLG	KIT	0.000449093	0	KITL_KIT	KITL - KIT	KIT	Secreted Signaling	KEGG: hsa04080
ClusterEpendymal	ClusterGABA_neurons	KITLG	KIT	0.00108844	0	KITL_KIT	KITL - KIT	KIT	Secreted Signaling	KEGG: hsa04080
ClusterGABA_neurons	ClusterGABA_neurons	KITLG	KIT	0.000583035	0	KITL_KIT	KITL - KIT	KIT	Secreted Signaling	KEGG: hsa04080
ClusterCA2-4_neurons	ClusterAstrocytes	BDNF	NTRK2	0.0166408	0	BDNF_NTRK2	BDNF - NTRK2	NT	Secreted Signaling	PMID: 27908981
ClusterImmature	ClusterAstrocytes	BDNF	NTRK2	0.0948673	0	BDNF_NTRK2	BDNF - NTRK2	NT	Secreted Signaling	PMID: 27908981
ClustermGC	ClusterAstrocytes	BDNF	NTRK2	0.105634	0	BDNF_NTRK2	BDNF - NTRK2	NT	Secreted Signaling	PMID: 27908981
ClusterCA2-4_neurons	ClusterCA2-4_neurons	BDNF	NTRK2	0.00692182	0	BDNF_NTRK2	BDNF - NTRK2	NT	Secreted Signaling	PMID: 27908981
ClusterImmature	ClusterCA2-4_neurons	BDNF	NTRK2	0.0413833	0	BDNF_NTRK2	BDNF - NTRK2	NT	Secreted Signaling	PMID: 27908981
ClustermGC	ClusterCA2-4_neurons	BDNF	NTRK2	0.0463913	0	BDNF_NTRK2	BDNF - NTRK2	NT	Secreted Signaling	PMID: 27908981
ClusterCA2-4_neurons	ClusterCA_neurons	BDNF	NTRK2	0.0100338	0	BDNF_NTRK2	BDNF - NTRK2	NT	Secreted Signaling	PMID: 27908981
ClusterImmature	ClusterCA_neurons	BDNF	NTRK2	0.0590674	0	BDNF_NTRK2	BDNF - NTRK2	NT	Secreted Signaling	PMID: 27908981
ClustermGC	ClusterCA_neurons	BDNF	NTRK2	0.0660679	0	BDNF_NTRK2	BDNF - NTRK2	NT	Secreted Signaling	PMID: 27908981
ClusterCA2-4_neurons	ClusterEndothelial	BDNF	NTRK2	0.002146	0	BDNF_NTRK2	BDNF - NTRK2	NT	Secreted Signaling	PMID: 27908981
ClusterImmature	ClusterEndothelial	BDNF	NTRK2	0.013145	0	BDNF_NTRK2	BDNF - NTRK2	NT	Secreted Signaling	PMID: 27908981
ClustermGC	ClusterEndothelial	BDNF	NTRK2	0.0147884	0	BDNF_NTRK2	BDNF - NTRK2	NT	Secreted Signaling	PMID: 27908981
ClusterCA2-4_neurons	ClusterEpendymal	BDNF	NTRK2	0.0131068	0	BDNF_NTRK2	BDNF - NTRK2	NT	Secreted Signaling	PMID: 27908981
ClusterImmature	ClusterEpendymal	BDNF	NTRK2	0.0760046	0	BDNF_NTRK2	BDNF - NTRK2	NT	Secreted Signaling	PMID: 27908981
ClustermGC	ClusterEpendymal	BDNF	NTRK2	0.0848316	0	BDNF_NTRK2	BDNF - NTRK2	NT	Secreted Signaling	PMID: 27908981
ClusterCA2-4_neurons	ClusterGABA_neurons	BDNF	NTRK2	0.012945	0	BDNF_NTRK2	BDNF - NTRK2	NT	Secreted Signaling	PMID: 27908981
ClusterImmature	ClusterGABA_neurons	BDNF	NTRK2	0.0751256	0	BDNF_NTRK2	BDNF - NTRK2	NT	Secreted Signaling	PMID: 27908981
ClustermGC	ClusterGABA_neurons	BDNF	NTRK2	0.0838597	0	BDNF_NTRK2	BDNF - NTRK2	NT	Secreted Signaling	PMID: 27908981
ClusterCA2-4_neurons	ClusterImmature	BDNF	NTRK2	0.00682361	0	BDNF_NTRK2	BDNF - NTRK2	NT	Secreted Signaling	PMID: 27908981
ClusterImmature	ClusterImmature	BDNF	NTRK2	0.0408163	0	BDNF_NTRK2	BDNF - NTRK2	NT	Secreted Signaling	PMID: 27908981
ClustermGC	ClusterImmature	BDNF	NTRK2	0.0457589	0	BDNF_NTRK2	BDNF - NTRK2	NT	Secreted Signaling	PMID: 27908981
ClusterCA2-4_neurons	ClusterNeural Stem	BDNF	NTRK2	0.015698	0	BDNF_NTRK2	BDNF - NTRK2	NT	Secreted Signaling	PMID: 27908981
ClusterImmature	ClusterNeural Stem	BDNF	NTRK2	0.0898979	0	BDNF_NTRK2	BDNF - NTRK2	NT	Secreted Signaling	PMID: 27908981
ClustermGC	ClusterNeural Stem	BDNF	NTRK2	0.100163	0	BDNF_NTRK2	BDNF - NTRK2	NT	Secreted Signaling	PMID: 27908981
ClusterCA2-4_neurons	ClusterNeuroblast	BDNF	NTRK2	0.0053473	0	BDNF_NTRK2	BDNF - NTRK2	NT	Secreted Signaling	PMID: 27908981
ClusterImmature	ClusterNeuroblast	BDNF	NTRK2	0.0322242	0	BDNF_NTRK2	BDNF - NTRK2	NT	Secreted Signaling	PMID: 27908981
ClustermGC	ClusterNeuroblast	BDNF	NTRK2	0.0361656	0	BDNF_NTRK2	BDNF - NTRK2	NT	Secreted Signaling	PMID: 27908981
ClusterCA2-4_neurons	ClusterOPCs	BDNF	NTRK2	0.0107534	0	BDNF_NTRK2	BDNF - NTRK2	NT	Secreted Signaling	PMID: 27908981
ClusterImmature	ClusterOPCs	BDNF	NTRK2	0.0630795	0	BDNF_NTRK2	BDNF - NTRK2	NT	Secreted Signaling	PMID: 27908981
ClustermGC	ClusterOPCs	BDNF	NTRK2	0.0705199	0	BDNF_NTRK2	BDNF - NTRK2	NT	Secreted Signaling	PMID: 27908981
ClusterCA2-4_neurons	ClustermGC	BDNF	NTRK2	0.0063599	0	BDNF_NTRK2	BDNF - NTRK2	NT	Secreted Signaling	PMID: 27908981
ClusterImmature	ClustermGC	BDNF	NTRK2	0.0381312	0	BDNF_NTRK2	BDNF - NTRK2	NT	Secreted Signaling	PMID: 27908981
ClustermGC	ClustermGC	BDNF	NTRK2	0.0427632	0	BDNF_NTRK2	BDNF - NTRK2	NT	Secreted Signaling	PMID: 27908981
ClusterCA2-4_neurons	ClustermOli	BDNF	NTRK2	0.00220482	0	BDNF_NTRK2	BDNF - NTRK2	NT	Secreted Signaling	PMID: 27908981
ClusterImmature	ClustermOli	BDNF	NTRK2	0.0135012	0	BDNF_NTRK2	BDNF - NTRK2	NT	Secreted Signaling	PMID: 27908981
ClustermGC	ClustermOli	BDNF	NTRK2	0.0151885	0	BDNF_NTRK2	BDNF - NTRK2	NT	Secreted Signaling	PMID: 27908981
ClusterCA2-4_neurons	ClusterCA_neurons	HGF	MET	0.000582916	0	HGF_MET	HGF - MET	HGF	Secreted Signaling	PMID: 28475121
ClustermGC	ClusterAstrocytes	NTF3	NTRK2	0.00955555	0	NTF3_NTRK2	NTF3 - NTRK2	NT	Secreted Signaling	PMID: 27908981
ClustermGC	ClusterCA2-4_neurons	NTF3	NTRK2	0.00395803	0	NTF3_NTRK2	NTF3 - NTRK2	NT	Secreted Signaling	PMID: 27908981
ClustermGC	ClusterCA_neurons	NTF3	NTRK2	0.00574524	0	NTF3_NTRK2	NTF3 - NTRK2	NT	Secreted Signaling	PMID: 27908981
ClustermGC	ClusterEndothelial	NTF3	NTRK2	0.0012246	0	NTF3_NTRK2	NTF3 - NTRK2	NT	Secreted Signaling	PMID: 27908981
ClustermGC	ClusterEpendymal	NTF3	NTRK2	0.00751477	0	NTF3_NTRK2	NTF3 - NTRK2	NT	Secreted Signaling	PMID: 27908981
ClustermGC	ClusterGABA_neurons	NTF3	NTRK2	0.0074215	0	NTF3_NTRK2	NTF3 - NTRK2	NT	Secreted Signaling	PMID: 27908981
ClustermGC	ClusterImmature	NTF3	NTRK2	0.00390171	0	NTF3_NTRK2	NTF3 - NTRK2	NT	Secreted Signaling	PMID: 27908981
ClustermGC	ClusterNeural Stem	NTF3	NTRK2	0.00901052	0	NTF3_NTRK2	NTF3 - NTRK2	NT	Secreted Signaling	PMID: 27908981
ClustermGC	ClusterNeuroblast	NTF3	NTRK2	0.00305562	0	NTF3_NTRK2	NTF3 - NTRK2	NT	Secreted Signaling	PMID: 27908981
ClustermGC	ClusterOPCs	NTF3	NTRK2	0.00615919	0	NTF3_NTRK2	NTF3 - NTRK2	NT	Secreted Signaling	PMID: 27908981
ClustermGC	ClustermGC	NTF3	NTRK2	0.00363583	0	NTF3_NTRK2	NTF3 - NTRK2	NT	Secreted Signaling	PMID: 27908981
ClustermGC	ClustermOli	NTF3	NTRK2	0.0012582	0	NTF3_NTRK2	NTF3 - NTRK2	NT	Secreted Signaling	PMID: 27908981
ClustermGC	ClusterAstrocytes	NTF3	NTRK3	0.00514872	0	NTF3_NTRK3	NTF3 - NTRK3	NT	Secreted Signaling	PMID: 27908981
ClustermGC	ClusterCA2-4_neurons	NTF3	NTRK3	0.00599375	0	NTF3_NTRK3	NTF3 - NTRK3	NT	Secreted Signaling	PMID: 27908981
ClustermGC	ClusterCA_neurons	NTF3	NTRK3	0.00616412	0	NTF3_NTRK3	NTF3 - NTRK3	NT	Secreted Signaling	PMID: 27908981
ClustermGC	ClusterEndothelial	NTF3	NTRK3	0.00111294	0	NTF3_NTRK3	NTF3 - NTRK3	NT	Secreted Signaling	PMID: 27908981
ClustermGC	ClusterEpendymal	NTF3	NTRK3	0.00106834	0	NTF3_NTRK3	NTF3 - NTRK3	NT	Secreted Signaling	PMID: 27908981
ClustermGC	ClusterGABA_neurons	NTF3	NTRK3	0.00527741	0	NTF3_NTRK3	NTF3 - NTRK3	NT	Secreted Signaling	PMID: 27908981
ClustermGC	ClusterImmature	NTF3	NTRK3	0.00605866	0	NTF3_NTRK3	NTF3 - NTRK3	NT	Secreted Signaling	PMID: 27908981
ClustermGC	ClusterNeural Stem	NTF3	NTRK3	0.00593185	0	NTF3_NTRK3	NTF3 - NTRK3	NT	Secreted Signaling	PMID: 27908981
ClustermGC	ClusterOPCs	NTF3	NTRK3	0.00594119	0	NTF3_NTRK3	NTF3 - NTRK3	NT	Secreted Signaling	PMID: 27908981
ClustermGC	ClustermGC	NTF3	NTRK3	0.00587284	0	NTF3_NTRK3	NTF3 - NTRK3	NT	Secreted Signaling	PMID: 27908981
ClusterAstrocytes	ClusterCA2-4_neurons	SEMA3A	NRP1_PLXNA1	0.00148961	0	SEMA3A_NRP1_PLXNA1	SEMA3A - (NRP1+PLXNA1)	SEMA3	Secreted Signaling	PMID: 27533782
ClusterEpendymal	ClusterCA2-4_neurons	SEMA3A	NRP1_PLXNA1	0.00187806	0	SEMA3A_NRP1_PLXNA1	SEMA3A - (NRP1+PLXNA1)	SEMA3	Secreted Signaling	PMID: 27533782
ClusterAstrocytes	ClusterCA_neurons	SEMA3A	NRP1_PLXNA1	0.00100592	0	SEMA3A_NRP1_PLXNA1	SEMA3A - (NRP1+PLXNA1)	SEMA3	Secreted Signaling	PMID: 27533782
ClusterEpendymal	ClusterCA_neurons	SEMA3A	NRP1_PLXNA1	0.0012684	0	SEMA3A_NRP1_PLXNA1	SEMA3A - (NRP1+PLXNA1)	SEMA3	Secreted Signaling	PMID: 27533782
ClusterAstrocytes	ClusterImmature	SEMA3A	NRP1_PLXNA1	0.00133433	0	SEMA3A_NRP1_PLXNA1	SEMA3A - (NRP1+PLXNA1)	SEMA3	Secreted Signaling	PMID: 27533782
ClusterEpendymal	ClusterImmature	SEMA3A	NRP1_PLXNA1	0.00168236	0	SEMA3A_NRP1_PLXNA1	SEMA3A - (NRP1+PLXNA1)	SEMA3	Secreted Signaling	PMID: 27533782
ClusterAstrocytes	ClusterCA2-4_neurons	SEMA3A	NRP1_PLXNA2	0.00460316	0	SEMA3A_NRP1_PLXNA2	SEMA3A - (NRP1+PLXNA2)	SEMA3	Secreted Signaling	PMID: 27533782
ClusterEpendymal	ClusterCA2-4_neurons	SEMA3A	NRP1_PLXNA2	0.00579883	0	SEMA3A_NRP1_PLXNA2	SEMA3A - (NRP1+PLXNA2)	SEMA3	Secreted Signaling	PMID: 27533782
ClusterAstrocytes	ClusterCA_neurons	SEMA3A	NRP1_PLXNA2	0.0037031	0	SEMA3A_NRP1_PLXNA2	SEMA3A - (NRP1+PLXNA2)	SEMA3	Secreted Signaling	PMID: 27533782
ClusterEpendymal	ClusterCA_neurons	SEMA3A	NRP1_PLXNA2	0.00466609	0	SEMA3A_NRP1_PLXNA2	SEMA3A - (NRP1+PLXNA2)	SEMA3	Secreted Signaling	PMID: 27533782
ClusterAstrocytes	ClusterEndothelial	SEMA3A	NRP1_PLXNA2	0.00215234	0	SEMA3A_NRP1_PLXNA2	SEMA3A - (NRP1+PLXNA2)	SEMA3	Secreted Signaling	PMID: 27533782
ClusterEpendymal	ClusterEndothelial	SEMA3A	NRP1_PLXNA2	0.00271315	0	SEMA3A_NRP1_PLXNA2	SEMA3A - (NRP1+PLXNA2)	SEMA3	Secreted Signaling	PMID: 27533782
ClusterAstrocytes	ClusterEpendymal	SEMA3A	NRP1_PLXNA2	0.00116631	0	SEMA3A_NRP1_PLXNA2	SEMA3A - (NRP1+PLXNA2)	SEMA3	Secreted Signaling	PMID: 27533782
ClusterEpendymal	ClusterEpendymal	SEMA3A	NRP1_PLXNA2	0.00147058	0	SEMA3A_NRP1_PLXNA2	SEMA3A - (NRP1+PLXNA2)	SEMA3	Secreted Signaling	PMID: 27533782
ClusterAstrocytes	ClusterGABA_neurons	SEMA3A	NRP1_PLXNA2	0.000987913	0	SEMA3A_NRP1_PLXNA2	SEMA3A - (NRP1+PLXNA2)	SEMA3	Secreted Signaling	PMID: 27533782
ClusterEpendymal	ClusterGABA_neurons	SEMA3A	NRP1_PLXNA2	0.0012457	0	SEMA3A_NRP1_PLXNA2	SEMA3A - (NRP1+PLXNA2)	SEMA3	Secreted Signaling	PMID: 27533782
ClusterAstrocytes	ClusterImmature	SEMA3A	NRP1_PLXNA2	0.00469434	0	SEMA3A_NRP1_PLXNA2	SEMA3A - (NRP1+PLXNA2)	SEMA3	Secreted Signaling	PMID: 27533782
ClusterEpendymal	ClusterImmature	SEMA3A	NRP1_PLXNA2	0.00591356	0	SEMA3A_NRP1_PLXNA2	SEMA3A - (NRP1+PLXNA2)	SEMA3	Secreted Signaling	PMID: 27533782
ClusterAstrocytes	ClusterNeural Stem	SEMA3A	NRP1_PLXNA2	0.00130413	0	SEMA3A_NRP1_PLXNA2	SEMA3A - (NRP1+PLXNA2)	SEMA3	Secreted Signaling	PMID: 27533782
ClusterEpendymal	ClusterNeural Stem	SEMA3A	NRP1_PLXNA2	0.0016443	0	SEMA3A_NRP1_PLXNA2	SEMA3A - (NRP1+PLXNA2)	SEMA3	Secreted Signaling	PMID: 27533782
ClusterAstrocytes	ClustermGC	SEMA3A	NRP1_PLXNA2	0.00515943	0	SEMA3A_NRP1_PLXNA2	SEMA3A - (NRP1+PLXNA2)	SEMA3	Secreted Signaling	PMID: 27533782
ClusterEpendymal	ClustermGC	SEMA3A	NRP1_PLXNA2	0.00649866	0	SEMA3A_NRP1_PLXNA2	SEMA3A - (NRP1+PLXNA2)	SEMA3	Secreted Signaling	PMID: 27533782
ClusterAstrocytes	ClusterCA2-4_neurons	SEMA3A	NRP1_PLXNA4	0.00891534	0	SEMA3A_NRP1_PLXNA4	SEMA3A - (NRP1+PLXNA4)	SEMA3	Secreted Signaling	PMID: 27533782
ClusterEpendymal	ClusterCA2-4_neurons	SEMA3A	NRP1_PLXNA4	0.0112185	0	SEMA3A_NRP1_PLXNA4	SEMA3A - (NRP1+PLXNA4)	SEMA3	Secreted Signaling	PMID: 27533782
ClusterAstrocytes	ClusterCA_neurons	SEMA3A	NRP1_PLXNA4	0.00474196	0	SEMA3A_NRP1_PLXNA4	SEMA3A - (NRP1+PLXNA4)	SEMA3	Secreted Signaling	PMID: 27533782
ClusterEpendymal	ClusterCA_neurons	SEMA3A	NRP1_PLXNA4	0.00597347	0	SEMA3A_NRP1_PLXNA4	SEMA3A - (NRP1+PLXNA4)	SEMA3	Secreted Signaling	PMID: 27533782
ClusterAstrocytes	ClusterGABA_neurons	SEMA3A	NRP1_PLXNA4	0.00136523	0	SEMA3A_NRP1_PLXNA4	SEMA3A - (NRP1+PLXNA4)	SEMA3	Secreted Signaling	PMID: 27533782
ClusterEpendymal	ClusterGABA_neurons	SEMA3A	NRP1_PLXNA4	0.00172131	0	SEMA3A_NRP1_PLXNA4	SEMA3A - (NRP1+PLXNA4)	SEMA3	Secreted Signaling	PMID: 27533782
ClusterAstrocytes	ClusterImmature	SEMA3A	NRP1_PLXNA4	0.00875597	0	SEMA3A_NRP1_PLXNA4	SEMA3A - (NRP1+PLXNA4)	SEMA3	Secreted Signaling	PMID: 27533782
ClusterEpendymal	ClusterImmature	SEMA3A	NRP1_PLXNA4	0.0110184	0	SEMA3A_NRP1_PLXNA4	SEMA3A - (NRP1+PLXNA4)	SEMA3	Secreted Signaling	PMID: 27533782
ClusterAstrocytes	ClustermGC	SEMA3A	NRP1_PLXNA4	0.00914749	0	SEMA3A_NRP1_PLXNA4	SEMA3A - (NRP1+PLXNA4)	SEMA3	Secreted Signaling	PMID: 27533782
ClusterEpendymal	ClustermGC	SEMA3A	NRP1_PLXNA4	0.0115099	0	SEMA3A_NRP1_PLXNA4	SEMA3A - (NRP1+PLXNA4)	SEMA3	Secreted Signaling	PMID: 27533782
ClusterEpendymal	ClusterCA2-4_neurons	SEMA3B	NRP1_PLXNA1	0.000509467	0	SEMA3B_NRP1_PLXNA1	SEMA3B - (NRP1+PLXNA1)	SEMA3	Secreted Signaling	PMID: 27533782
ClusterNeuroblast	ClusterCA2-4_neurons	SEMA3B	NRP1_PLXNA1	0.00313477	0	SEMA3B_NRP1_PLXNA1	SEMA3B - (NRP1+PLXNA1)	SEMA3	Secreted Signaling	PMID: 27533782
ClustermOli	ClusterCA2-4_neurons	SEMA3B	NRP1_PLXNA1	0.00411242	0	SEMA3B_NRP1_PLXNA1	SEMA3B - (NRP1+PLXNA1)	SEMA3	Secreted Signaling	PMID: 27533782
ClusterEpendymal	ClusterCA_neurons	SEMA3B	NRP1_PLXNA1	0.000343929	0	SEMA3B_NRP1_PLXNA1	SEMA3B - (NRP1+PLXNA1)	SEMA3	Secreted Signaling	PMID: 27533782
ClusterNeuroblast	ClusterCA_neurons	SEMA3B	NRP1_PLXNA1	0.00211801	0	SEMA3B_NRP1_PLXNA1	SEMA3B - (NRP1+PLXNA1)	SEMA3	Secreted Signaling	PMID: 27533782
ClustermOli	ClusterCA_neurons	SEMA3B	NRP1_PLXNA1	0.00277945	0	SEMA3B_NRP1_PLXNA1	SEMA3B - (NRP1+PLXNA1)	SEMA3	Secreted Signaling	PMID: 27533782
ClusterEpendymal	ClusterImmature	SEMA3B	NRP1_PLXNA1	0.000456314	0	SEMA3B_NRP1_PLXNA1	SEMA3B - (NRP1+PLXNA1)	SEMA3	Secreted Signaling	PMID: 27533782
ClusterNeuroblast	ClusterImmature	SEMA3B	NRP1_PLXNA1	0.00280849	0	SEMA3B_NRP1_PLXNA1	SEMA3B - (NRP1+PLXNA1)	SEMA3	Secreted Signaling	PMID: 27533782
ClustermOli	ClusterImmature	SEMA3B	NRP1_PLXNA1	0.00368475	0	SEMA3B_NRP1_PLXNA1	SEMA3B - (NRP1+PLXNA1)	SEMA3	Secreted Signaling	PMID: 27533782
ClusterEpendymal	ClusterCA2-4_neurons	SEMA3B	NRP1_PLXNA2	0.00157758	0	SEMA3B_NRP1_PLXNA2	SEMA3B - (NRP1+PLXNA2)	SEMA3	Secreted Signaling	PMID: 27533782
ClusterNeuroblast	ClusterCA2-4_neurons	SEMA3B	NRP1_PLXNA2	0.00965375	0	SEMA3B_NRP1_PLXNA2	SEMA3B - (NRP1+PLXNA2)	SEMA3	Secreted Signaling	PMID: 27533782
ClustermOli	ClusterCA2-4_neurons	SEMA3B	NRP1_PLXNA2	0.0126387	0	SEMA3B_NRP1_PLXNA2	SEMA3B - (NRP1+PLXNA2)	SEMA3	Secreted Signaling	PMID: 27533782
ClusterEpendymal	ClusterCA_neurons	SEMA3B	NRP1_PLXNA2	0.00126837	0	SEMA3B_NRP1_PLXNA2	SEMA3B - (NRP1+PLXNA2)	SEMA3	Secreted Signaling	PMID: 27533782
ClusterNeuroblast	ClusterCA_neurons	SEMA3B	NRP1_PLXNA2	0.00777387	0	SEMA3B_NRP1_PLXNA2	SEMA3B - (NRP1+PLXNA2)	SEMA3	Secreted Signaling	PMID: 27533782
ClustermOli	ClusterCA_neurons	SEMA3B	NRP1_PLXNA2	0.0101835	0	SEMA3B_NRP1_PLXNA2	SEMA3B - (NRP1+PLXNA2)	SEMA3	Secreted Signaling	PMID: 27533782
ClusterEpendymal	ClusterEndothelial	SEMA3B	NRP1_PLXNA2	0.000736454	0	SEMA3B_NRP1_PLXNA2	SEMA3B - (NRP1+PLXNA2)	SEMA3	Secreted Signaling	PMID: 27533782
ClusterNeuroblast	ClusterEndothelial	SEMA3B	NRP1_PLXNA2	0.00452612	0	SEMA3B_NRP1_PLXNA2	SEMA3B - (NRP1+PLXNA2)	SEMA3	Secreted Signaling	PMID: 27533782
ClustermOli	ClusterEndothelial	SEMA3B	NRP1_PLXNA2	0.00593512	0	SEMA3B_NRP1_PLXNA2	SEMA3B - (NRP1+PLXNA2)	SEMA3	Secreted Signaling	PMID: 27533782
ClusterEpendymal	ClusterEpendymal	SEMA3B	NRP1_PLXNA2	0.00039881	0	SEMA3B_NRP1_PLXNA2	SEMA3B - (NRP1+PLXNA2)	SEMA3	Secreted Signaling	PMID: 27533782
ClusterNeuroblast	ClusterEpendymal	SEMA3B	NRP1_PLXNA2	0.00245529	0	SEMA3B_NRP1_PLXNA2	SEMA3B - (NRP1+PLXNA2)	SEMA3	Secreted Signaling	PMID: 27533782
ClustermOli	ClusterEpendymal	SEMA3B	NRP1_PLXNA2	0.00322171	0	SEMA3B_NRP1_PLXNA2	SEMA3B - (NRP1+PLXNA2)	SEMA3	Secreted Signaling	PMID: 27533782
ClusterEpendymal	ClusterGABA_neurons	SEMA3B	NRP1_PLXNA2	0.000337769	0	SEMA3B_NRP1_PLXNA2	SEMA3B - (NRP1+PLXNA2)	SEMA3	Secreted Signaling	PMID: 27533782
ClusterNeuroblast	ClusterGABA_neurons	SEMA3B	NRP1_PLXNA2	0.00208014	0	SEMA3B_NRP1_PLXNA2	SEMA3B - (NRP1+PLXNA2)	SEMA3	Secreted Signaling	PMID: 27533782
ClustermOli	ClusterGABA_neurons	SEMA3B	NRP1_PLXNA2	0.00272978	0	SEMA3B_NRP1_PLXNA2	SEMA3B - (NRP1+PLXNA2)	SEMA3	Secreted Signaling	PMID: 27533782
ClusterEpendymal	ClusterImmature	SEMA3B	NRP1_PLXNA2	0.00160893	0	SEMA3B_NRP1_PLXNA2	SEMA3B - (NRP1+PLXNA2)	SEMA3	Secreted Signaling	PMID: 27533782
ClusterNeuroblast	ClusterImmature	SEMA3B	NRP1_PLXNA2	0.00984398	0	SEMA3B_NRP1_PLXNA2	SEMA3B - (NRP1+PLXNA2)	SEMA3	Secreted Signaling	PMID: 27533782
ClustermOli	ClusterImmature	SEMA3B	NRP1_PLXNA2	0.012887	0	SEMA3B_NRP1_PLXNA2	SEMA3B - (NRP1+PLXNA2)	SEMA3	Secreted Signaling	PMID: 27533782
ClusterEpendymal	ClusterNeural Stem	SEMA3B	NRP1_PLXNA2	0.000445977	0	SEMA3B_NRP1_PLXNA2	SEMA3B - (NRP1+PLXNA2)	SEMA3	Secreted Signaling	PMID: 27533782
ClusterNeuroblast	ClusterNeural Stem	SEMA3B	NRP1_PLXNA2	0.00274501	0	SEMA3B_NRP1_PLXNA2	SEMA3B - (NRP1+PLXNA2)	SEMA3	Secreted Signaling	PMID: 27533782
ClustermOli	ClusterNeural Stem	SEMA3B	NRP1_PLXNA2	0.00360154	0	SEMA3B_NRP1_PLXNA2	SEMA3B - (NRP1+PLXNA2)	SEMA3	Secreted Signaling	PMID: 27533782
ClusterEpendymal	ClustermGC	SEMA3B	NRP1_PLXNA2	0.00176888	0	SEMA3B_NRP1_PLXNA2	SEMA3B - (NRP1+PLXNA2)	SEMA3	Secreted Signaling	PMID: 27533782
ClusterNeuroblast	ClustermGC	SEMA3B	NRP1_PLXNA2	0.0108137	0	SEMA3B_NRP1_PLXNA2	SEMA3B - (NRP1+PLXNA2)	SEMA3	Secreted Signaling	PMID: 27533782
ClustermOli	ClustermGC	SEMA3B	NRP1_PLXNA2	0.0141522	0	SEMA3B_NRP1_PLXNA2	SEMA3B - (NRP1+PLXNA2)	SEMA3	Secreted Signaling	PMID: 27533782
ClusterEpendymal	ClusterCA2-4_neurons	SEMA3B	NRP1_PLXNA4	0.00306417	0	SEMA3B_NRP1_PLXNA4	SEMA3B - (NRP1+PLXNA4)	SEMA3	Secreted Signaling	PMID: 27533782
ClusterNeuroblast	ClusterCA2-4_neurons	SEMA3B	NRP1_PLXNA4	0.0186088	0	SEMA3B_NRP1_PLXNA4	SEMA3B - (NRP1+PLXNA4)	SEMA3	Secreted Signaling	PMID: 27533782
ClustermOli	ClusterCA2-4_neurons	SEMA3B	NRP1_PLXNA4	0.0242948	0	SEMA3B_NRP1_PLXNA4	SEMA3B - (NRP1+PLXNA4)	SEMA3	Secreted Signaling	PMID: 27533782
ClusterEpendymal	ClusterCA_neurons	SEMA3B	NRP1_PLXNA4	0.0016253	0	SEMA3B_NRP1_PLXNA4	SEMA3B - (NRP1+PLXNA4)	SEMA3	Secreted Signaling	PMID: 27533782
ClusterNeuroblast	ClusterCA_neurons	SEMA3B	NRP1_PLXNA4	0.00994332	0	SEMA3B_NRP1_PLXNA4	SEMA3B - (NRP1+PLXNA4)	SEMA3	Secreted Signaling	PMID: 27533782
ClustermOli	ClusterCA_neurons	SEMA3B	NRP1_PLXNA4	0.0130166	0	SEMA3B_NRP1_PLXNA4	SEMA3B - (NRP1+PLXNA4)	SEMA3	Secreted Signaling	PMID: 27533782
ClusterEpendymal	ClusterGABA_neurons	SEMA3B	NRP1_PLXNA4	0.000466892	0	SEMA3B_NRP1_PLXNA4	SEMA3B - (NRP1+PLXNA4)	SEMA3	Secreted Signaling	PMID: 27533782
ClusterNeuroblast	ClusterGABA_neurons	SEMA3B	NRP1_PLXNA4	0.00287343	0	SEMA3B_NRP1_PLXNA4	SEMA3B - (NRP1+PLXNA4)	SEMA3	Secreted Signaling	PMID: 27533782
ClustermOli	ClusterGABA_neurons	SEMA3B	NRP1_PLXNA4	0.00376988	0	SEMA3B_NRP1_PLXNA4	SEMA3B - (NRP1+PLXNA4)	SEMA3	Secreted Signaling	PMID: 27533782
ClusterEpendymal	ClusterImmature	SEMA3B	NRP1_PLXNA4	0.00300908	0	SEMA3B_NRP1_PLXNA4	SEMA3B - (NRP1+PLXNA4)	SEMA3	Secreted Signaling	PMID: 27533782
ClusterNeuroblast	ClusterImmature	SEMA3B	NRP1_PLXNA4	0.0182794	0	SEMA3B_NRP1_PLXNA4	SEMA3B - (NRP1+PLXNA4)	SEMA3	Secreted Signaling	PMID: 27533782
ClustermOli	ClusterImmature	SEMA3B	NRP1_PLXNA4	0.0238671	0	SEMA3B_NRP1_PLXNA4	SEMA3B - (NRP1+PLXNA4)	SEMA3	Secreted Signaling	PMID: 27533782
ClusterEpendymal	ClustermGC	SEMA3B	NRP1_PLXNA4	0.00314444	0	SEMA3B_NRP1_PLXNA4	SEMA3B - (NRP1+PLXNA4)	SEMA3	Secreted Signaling	PMID: 27533782
ClusterNeuroblast	ClustermGC	SEMA3B	NRP1_PLXNA4	0.0190885	0	SEMA3B_NRP1_PLXNA4	SEMA3B - (NRP1+PLXNA4)	SEMA3	Secreted Signaling	PMID: 27533782
ClustermOli	ClustermGC	SEMA3B	NRP1_PLXNA4	0.0249173	0	SEMA3B_NRP1_PLXNA4	SEMA3B - (NRP1+PLXNA4)	SEMA3	Secreted Signaling	PMID: 27533782
ClusterImmature	ClusterCA2-4_neurons	SEMA3C	NRP1_PLXNA1	0.0132482	0	SEMA3C_NRP1_PLXNA1	SEMA3C - (NRP1+PLXNA1)	SEMA3	Secreted Signaling	PMID: 27533782
ClustermGC	ClusterCA2-4_neurons	SEMA3C	NRP1_PLXNA1	0.0130807	0	SEMA3C_NRP1_PLXNA1	SEMA3C - (NRP1+PLXNA1)	SEMA3	Secreted Signaling	PMID: 27533782
ClustermOli	ClusterCA2-4_neurons	SEMA3C	NRP1_PLXNA1	0.00472351	0	SEMA3C_NRP1_PLXNA1	SEMA3C - (NRP1+PLXNA1)	SEMA3	Secreted Signaling	PMID: 27533782
ClusterImmature	ClusterCA_neurons	SEMA3C	NRP1_PLXNA1	0.00898072	0	SEMA3C_NRP1_PLXNA1	SEMA3C - (NRP1+PLXNA1)	SEMA3	Secreted Signaling	PMID: 27533782
ClustermGC	ClusterCA_neurons	SEMA3C	NRP1_PLXNA1	0.00886667	0	SEMA3C_NRP1_PLXNA1	SEMA3C - (NRP1+PLXNA1)	SEMA3	Secreted Signaling	PMID: 27533782
ClustermOli	ClusterCA_neurons	SEMA3C	NRP1_PLXNA1	0.0031931	0	SEMA3C_NRP1_PLXNA1	SEMA3C - (NRP1+PLXNA1)	SEMA3	Secreted Signaling	PMID: 27533782
ClusterImmature	ClusterImmature	SEMA3C	NRP1_PLXNA1	0.0118818	0	SEMA3C_NRP1_PLXNA1	SEMA3C - (NRP1+PLXNA1)	SEMA3	Secreted Signaling	PMID: 27533782
ClustermGC	ClusterImmature	SEMA3C	NRP1_PLXNA1	0.0117313	0	SEMA3C_NRP1_PLXNA1	SEMA3C - (NRP1+PLXNA1)	SEMA3	Secreted Signaling	PMID: 27533782
ClustermOli	ClusterImmature	SEMA3C	NRP1_PLXNA1	0.00423256	0	SEMA3C_NRP1_PLXNA1	SEMA3C - (NRP1+PLXNA1)	SEMA3	Secreted Signaling	PMID: 27533782
ClusterImmature	ClusterCA2-4_neurons	SEMA3C	NRP1_PLXNA2	0.0399558	0	SEMA3C_NRP1_PLXNA2	SEMA3C - (NRP1+PLXNA2)	SEMA3	Secreted Signaling	PMID: 27533782
ClustermGC	ClusterCA2-4_neurons	SEMA3C	NRP1_PLXNA2	0.039464	0	SEMA3C_NRP1_PLXNA2	SEMA3C - (NRP1+PLXNA2)	SEMA3	Secreted Signaling	PMID: 27533782
ClustermOli	ClusterCA2-4_neurons	SEMA3C	NRP1_PLXNA2	0.0144983	0	SEMA3C_NRP1_PLXNA2	SEMA3C - (NRP1+PLXNA2)	SEMA3	Secreted Signaling	PMID: 27533782
ClusterImmature	ClusterCA_neurons	SEMA3C	NRP1_PLXNA2	0.032368	0	SEMA3C_NRP1_PLXNA2	SEMA3C - (NRP1+PLXNA2)	SEMA3	Secreted Signaling	PMID: 27533782
ClustermGC	ClusterCA_neurons	SEMA3C	NRP1_PLXNA2	0.0319666	0	SEMA3C_NRP1_PLXNA2	SEMA3C - (NRP1+PLXNA2)	SEMA3	Secreted Signaling	PMID: 27533782
ClustermOli	ClusterCA_neurons	SEMA3C	NRP1_PLXNA2	0.0116862	0	SEMA3C_NRP1_PLXNA2	SEMA3C - (NRP1+PLXNA2)	SEMA3	Secreted Signaling	PMID: 27533782
ClusterImmature	ClusterEndothelial	SEMA3C	NRP1_PLXNA2	0.0190426	0	SEMA3C_NRP1_PLXNA2	SEMA3C - (NRP1+PLXNA2)	SEMA3	Secreted Signaling	PMID: 27533782
ClustermGC	ClusterEndothelial	SEMA3C	NRP1_PLXNA2	0.0188032	0	SEMA3C_NRP1_PLXNA2	SEMA3C - (NRP1+PLXNA2)	SEMA3	Secreted Signaling	PMID: 27533782
ClustermOli	ClusterEndothelial	SEMA3C	NRP1_PLXNA2	0.0068152	0	SEMA3C_NRP1_PLXNA2	SEMA3C - (NRP1+PLXNA2)	SEMA3	Secreted Signaling	PMID: 27533782
ClusterImmature	ClusterEpendymal	SEMA3C	NRP1_PLXNA2	0.0103994	0	SEMA3C_NRP1_PLXNA2	SEMA3C - (NRP1+PLXNA2)	SEMA3	Secreted Signaling	PMID: 27533782
ClustermGC	ClusterEpendymal	SEMA3C	NRP1_PLXNA2	0.0102676	0	SEMA3C_NRP1_PLXNA2	SEMA3C - (NRP1+PLXNA2)	SEMA3	Secreted Signaling	PMID: 27533782
ClustermOli	ClusterEpendymal	SEMA3C	NRP1_PLXNA2	0.00370094	0	SEMA3C_NRP1_PLXNA2	SEMA3C - (NRP1+PLXNA2)	SEMA3	Secreted Signaling	PMID: 27533782
ClusterImmature	ClusterGABA_neurons	SEMA3C	NRP1_PLXNA2	0.00882122	0	SEMA3C_NRP1_PLXNA2	SEMA3C - (NRP1+PLXNA2)	SEMA3	Secreted Signaling	PMID: 27533782
ClustermGC	ClusterGABA_neurons	SEMA3C	NRP1_PLXNA2	0.00870918	0	SEMA3C_NRP1_PLXNA2	SEMA3C - (NRP1+PLXNA2)	SEMA3	Secreted Signaling	PMID: 27533782
ClustermOli	ClusterGABA_neurons	SEMA3C	NRP1_PLXNA2	0.00313606	0	SEMA3C_NRP1_PLXNA2	SEMA3C - (NRP1+PLXNA2)	SEMA3	Secreted Signaling	PMID: 27533782
ClusterImmature	ClusterImmature	SEMA3C	NRP1_PLXNA2	0.0407186	0	SEMA3C_NRP1_PLXNA2	SEMA3C - (NRP1+PLXNA2)	SEMA3	Secreted Signaling	PMID: 27533782
ClustermGC	ClusterImmature	SEMA3C	NRP1_PLXNA2	0.0402178	0	SEMA3C_NRP1_PLXNA2	SEMA3C - (NRP1+PLXNA2)	SEMA3	Secreted Signaling	PMID: 27533782
ClustermOli	ClusterImmature	SEMA3C	NRP1_PLXNA2	0.0147826	0	SEMA3C_NRP1_PLXNA2	SEMA3C - (NRP1+PLXNA2)	SEMA3	Secreted Signaling	PMID: 27533782
ClusterImmature	ClusterNeural Stem	SEMA3C	NRP1_PLXNA2	0.0116156	0	SEMA3C_NRP1_PLXNA2	SEMA3C - (NRP1+PLXNA2)	SEMA3	Secreted Signaling	PMID: 27533782
ClustermGC	ClusterNeural Stem	SEMA3C	NRP1_PLXNA2	0.0114685	0	SEMA3C_NRP1_PLXNA2	SEMA3C - (NRP1+PLXNA2)	SEMA3	Secreted Signaling	PMID: 27533782
ClustermOli	ClusterNeural Stem	SEMA3C	NRP1_PLXNA2	0.00413703	0	SEMA3C_NRP1_PLXNA2	SEMA3C - (NRP1+PLXNA2)	SEMA3	Secreted Signaling	PMID: 27533782
ClusterImmature	ClustermGC	SEMA3C	NRP1_PLXNA2	0.0445929	0	SEMA3C_NRP1_PLXNA2	SEMA3C - (NRP1+PLXNA2)	SEMA3	Secreted Signaling	PMID: 27533782
ClustermGC	ClustermGC	SEMA3C	NRP1_PLXNA2	0.0440467	0	SEMA3C_NRP1_PLXNA2	SEMA3C - (NRP1+PLXNA2)	SEMA3	Secreted Signaling	PMID: 27533782
ClustermOli	ClustermGC	SEMA3C	NRP1_PLXNA2	0.0162309	0	SEMA3C_NRP1_PLXNA2	SEMA3C - (NRP1+PLXNA2)	SEMA3	Secreted Signaling	PMID: 27533782
ClusterImmature	ClusterCA2-4_neurons	SEMA3C	NRP1_PLXNA4	0.0748941	0	SEMA3C_NRP1_PLXNA4	SEMA3C - (NRP1+PLXNA4)	SEMA3	Secreted Signaling	PMID: 27533782
ClustermGC	ClusterCA2-4_neurons	SEMA3C	NRP1_PLXNA4	0.0740055	0	SEMA3C_NRP1_PLXNA4	SEMA3C - (NRP1+PLXNA4)	SEMA3	Secreted Signaling	PMID: 27533782
ClustermOli	ClusterCA2-4_neurons	SEMA3C	NRP1_PLXNA4	0.0278211	0	SEMA3C_NRP1_PLXNA4	SEMA3C - (NRP1+PLXNA4)	SEMA3	Secreted Signaling	PMID: 27533782
ClusterImmature	ClusterCA_neurons	SEMA3C	NRP1_PLXNA4	0.0411166	0	SEMA3C_NRP1_PLXNA4	SEMA3C - (NRP1+PLXNA4)	SEMA3	Secreted Signaling	PMID: 27533782
ClustermGC	ClusterCA_neurons	SEMA3C	NRP1_PLXNA4	0.0406111	0	SEMA3C_NRP1_PLXNA4	SEMA3C - (NRP1+PLXNA4)	SEMA3	Secreted Signaling	PMID: 27533782
ClustermOli	ClusterCA_neurons	SEMA3C	NRP1_PLXNA4	0.014931	0	SEMA3C_NRP1_PLXNA4	SEMA3C - (NRP1+PLXNA4)	SEMA3	Secreted Signaling	PMID: 27533782
ClusterImmature	ClusterGABA_neurons	SEMA3C	NRP1_PLXNA4	0.012154	0	SEMA3C_NRP1_PLXNA4	SEMA3C - (NRP1+PLXNA4)	SEMA3	Secreted Signaling	PMID: 27533782
ClustermGC	ClusterGABA_neurons	SEMA3C	NRP1_PLXNA4	0.0120001	0	SEMA3C_NRP1_PLXNA4	SEMA3C - (NRP1+PLXNA4)	SEMA3	Secreted Signaling	PMID: 27533782
ClustermOli	ClusterGABA_neurons	SEMA3C	NRP1_PLXNA4	0.00433029	0	SEMA3C_NRP1_PLXNA4	SEMA3C - (NRP1+PLXNA4)	SEMA3	Secreted Signaling	PMID: 27533782
ClusterImmature	ClusterImmature	SEMA3C	NRP1_PLXNA4	0.0736429	0	SEMA3C_NRP1_PLXNA4	SEMA3C - (NRP1+PLXNA4)	SEMA3	Secreted Signaling	PMID: 27533782
ClustermGC	ClusterImmature	SEMA3C	NRP1_PLXNA4	0.072768	0	SEMA3C_NRP1_PLXNA4	SEMA3C - (NRP1+PLXNA4)	SEMA3	Secreted Signaling	PMID: 27533782
ClustermOli	ClusterImmature	SEMA3C	NRP1_PLXNA4	0.0273331	0	SEMA3C_NRP1_PLXNA4	SEMA3C - (NRP1+PLXNA4)	SEMA3	Secreted Signaling	PMID: 27533782
ClusterImmature	ClustermGC	SEMA3C	NRP1_PLXNA4	0.0767113	0	SEMA3C_NRP1_PLXNA4	SEMA3C - (NRP1+PLXNA4)	SEMA3	Secreted Signaling	PMID: 27533782
ClustermGC	ClustermGC	SEMA3C	NRP1_PLXNA4	0.0758029	0	SEMA3C_NRP1_PLXNA4	SEMA3C - (NRP1+PLXNA4)	SEMA3	Secreted Signaling	PMID: 27533782
ClustermOli	ClustermGC	SEMA3C	NRP1_PLXNA4	0.0285314	0	SEMA3C_NRP1_PLXNA4	SEMA3C - (NRP1+PLXNA4)	SEMA3	Secreted Signaling	PMID: 27533782
ClusterCA_neurons	ClusterCA2-4_neurons	SEMA3D	NRP1_PLXNA1	0.00224439	0	SEMA3D_NRP1_PLXNA1	SEMA3D - (NRP1+PLXNA1)	SEMA3	Secreted Signaling	PMID: 27533782
ClusterEpendymal	ClusterCA2-4_neurons	SEMA3D	NRP1_PLXNA1	0.00108706	0	SEMA3D_NRP1_PLXNA1	SEMA3D - (NRP1+PLXNA1)	SEMA3	Secreted Signaling	PMID: 27533782
ClusterCA_neurons	ClusterCA_neurons	SEMA3D	NRP1_PLXNA1	0.00151599	0	SEMA3D_NRP1_PLXNA1	SEMA3D - (NRP1+PLXNA1)	SEMA3	Secreted Signaling	PMID: 27533782
ClusterEpendymal	ClusterCA_neurons	SEMA3D	NRP1_PLXNA1	0.000733983	0	SEMA3D_NRP1_PLXNA1	SEMA3D - (NRP1+PLXNA1)	SEMA3	Secreted Signaling	PMID: 27533782
ClusterCA_neurons	ClusterImmature	SEMA3D	NRP1_PLXNA1	0.0020106	0	SEMA3D_NRP1_PLXNA1	SEMA3D - (NRP1+PLXNA1)	SEMA3	Secreted Signaling	PMID: 27533782
ClusterEpendymal	ClusterImmature	SEMA3D	NRP1_PLXNA1	0.000973702	0	SEMA3D_NRP1_PLXNA1	SEMA3D - (NRP1+PLXNA1)	SEMA3	Secreted Signaling	PMID: 27533782
ClusterCA_neurons	ClusterCA2-4_neurons	SEMA3D	NRP1_PLXNA2	0.00692463	0	SEMA3D_NRP1_PLXNA2	SEMA3D - (NRP1+PLXNA2)	SEMA3	Secreted Signaling	PMID: 27533782
ClusterEpendymal	ClusterCA2-4_neurons	SEMA3D	NRP1_PLXNA2	0.00336203	0	SEMA3D_NRP1_PLXNA2	SEMA3D - (NRP1+PLXNA2)	SEMA3	Secreted Signaling	PMID: 27533782
ClusterCA_neurons	ClusterCA_neurons	SEMA3D	NRP1_PLXNA2	0.0055732	0	SEMA3D_NRP1_PLXNA2	SEMA3D - (NRP1+PLXNA2)	SEMA3	Secreted Signaling	PMID: 27533782
ClusterEpendymal	ClusterCA_neurons	SEMA3D	NRP1_PLXNA2	0.002704	0	SEMA3D_NRP1_PLXNA2	SEMA3D - (NRP1+PLXNA2)	SEMA3	Secreted Signaling	PMID: 27533782
ClusterCA_neurons	ClusterEndothelial	SEMA3D	NRP1_PLXNA2	0.00324184	0	SEMA3D_NRP1_PLXNA2	SEMA3D - (NRP1+PLXNA2)	SEMA3	Secreted Signaling	PMID: 27533782
ClusterEpendymal	ClusterEndothelial	SEMA3D	NRP1_PLXNA2	0.00157097	0	SEMA3D_NRP1_PLXNA2	SEMA3D - (NRP1+PLXNA2)	SEMA3	Secreted Signaling	PMID: 27533782
ClusterCA_neurons	ClusterEpendymal	SEMA3D	NRP1_PLXNA2	0.00175757	0	SEMA3D_NRP1_PLXNA2	SEMA3D - (NRP1+PLXNA2)	SEMA3	Secreted Signaling	PMID: 27533782
ClusterEpendymal	ClusterEpendymal	SEMA3D	NRP1_PLXNA2	0.000851052	0	SEMA3D_NRP1_PLXNA2	SEMA3D - (NRP1+PLXNA2)	SEMA3	Secreted Signaling	PMID: 27533782
ClusterCA_neurons	ClusterGABA_neurons	SEMA3D	NRP1_PLXNA2	0.00148887	0	SEMA3D_NRP1_PLXNA2	SEMA3D - (NRP1+PLXNA2)	SEMA3	Secreted Signaling	PMID: 27533782
ClusterEpendymal	ClusterGABA_neurons	SEMA3D	NRP1_PLXNA2	0.000720841	0	SEMA3D_NRP1_PLXNA2	SEMA3D - (NRP1+PLXNA2)	SEMA3	Secreted Signaling	PMID: 27533782
ClusterCA_neurons	ClusterImmature	SEMA3D	NRP1_PLXNA2	0.00706146	0	SEMA3D_NRP1_PLXNA2	SEMA3D - (NRP1+PLXNA2)	SEMA3	Secreted Signaling	PMID: 27533782
ClusterEpendymal	ClusterImmature	SEMA3D	NRP1_PLXNA2	0.00342871	0	SEMA3D_NRP1_PLXNA2	SEMA3D - (NRP1+PLXNA2)	SEMA3	Secreted Signaling	PMID: 27533782
ClusterCA_neurons	ClusterNeural Stem	SEMA3D	NRP1_PLXNA2	0.00196512	0	SEMA3D_NRP1_PLXNA2	SEMA3D - (NRP1+PLXNA2)	SEMA3	Secreted Signaling	PMID: 27533782
ClusterEpendymal	ClusterNeural Stem	SEMA3D	NRP1_PLXNA2	0.000951654	0	SEMA3D_NRP1_PLXNA2	SEMA3D - (NRP1+PLXNA2)	SEMA3	Secreted Signaling	PMID: 27533782
ClusterCA_neurons	ClustermGC	SEMA3D	NRP1_PLXNA2	0.00775926	0	SEMA3D_NRP1_PLXNA2	SEMA3D - (NRP1+PLXNA2)	SEMA3	Secreted Signaling	PMID: 27533782
ClusterEpendymal	ClustermGC	SEMA3D	NRP1_PLXNA2	0.00376889	0	SEMA3D_NRP1_PLXNA2	SEMA3D - (NRP1+PLXNA2)	SEMA3	Secreted Signaling	PMID: 27533782
ClusterCA_neurons	ClusterCA2-4_neurons	SEMA3D	NRP1_PLXNA4	0.0133823	0	SEMA3D_NRP1_PLXNA4	SEMA3D - (NRP1+PLXNA4)	SEMA3	Secreted Signaling	PMID: 27533782
ClusterEpendymal	ClusterCA2-4_neurons	SEMA3D	NRP1_PLXNA4	0.00651916	0	SEMA3D_NRP1_PLXNA4	SEMA3D - (NRP1+PLXNA4)	SEMA3	Secreted Signaling	PMID: 27533782
ClusterCA_neurons	ClusterCA_neurons	SEMA3D	NRP1_PLXNA4	0.00713293	0	SEMA3D_NRP1_PLXNA4	SEMA3D - (NRP1+PLXNA4)	SEMA3	Secreted Signaling	PMID: 27533782
ClusterEpendymal	ClusterCA_neurons	SEMA3D	NRP1_PLXNA4	0.00346354	0	SEMA3D_NRP1_PLXNA4	SEMA3D - (NRP1+PLXNA4)	SEMA3	Secreted Signaling	PMID: 27533782
ClusterCA_neurons	ClusterGABA_neurons	SEMA3D	NRP1_PLXNA4	0.00205713	0	SEMA3D_NRP1_PLXNA4	SEMA3D - (NRP1+PLXNA4)	SEMA3	Secreted Signaling	PMID: 27533782
ClusterEpendymal	ClusterGABA_neurons	SEMA3D	NRP1_PLXNA4	0.000996259	0	SEMA3D_NRP1_PLXNA4	SEMA3D - (NRP1+PLXNA4)	SEMA3	Secreted Signaling	PMID: 27533782
ClusterCA_neurons	ClusterImmature	SEMA3D	NRP1_PLXNA4	0.0131441	0	SEMA3D_NRP1_PLXNA4	SEMA3D - (NRP1+PLXNA4)	SEMA3	Secreted Signaling	PMID: 27533782
ClusterEpendymal	ClusterImmature	SEMA3D	NRP1_PLXNA4	0.00640234	0	SEMA3D_NRP1_PLXNA4	SEMA3D - (NRP1+PLXNA4)	SEMA3	Secreted Signaling	PMID: 27533782
ClusterCA_neurons	ClustermGC	SEMA3D	NRP1_PLXNA4	0.0137292	0	SEMA3D_NRP1_PLXNA4	SEMA3D - (NRP1+PLXNA4)	SEMA3	Secreted Signaling	PMID: 27533782
ClusterEpendymal	ClustermGC	SEMA3D	NRP1_PLXNA4	0.00668933	0	SEMA3D_NRP1_PLXNA4	SEMA3D - (NRP1+PLXNA4)	SEMA3	Secreted Signaling	PMID: 27533782
ClusterEpendymal	ClusterCA2-4_neurons	SEMA3B	NRP2_PLXNA1	0.000228884	0	SEMA3B_NRP2_PLXNA1	SEMA3B - (NRP2+PLXNA1)	SEMA3	Secreted Signaling	PMID: 27533782
ClusterNeuroblast	ClusterCA2-4_neurons	SEMA3B	NRP2_PLXNA1	0.00141037	0	SEMA3B_NRP2_PLXNA1	SEMA3B - (NRP2+PLXNA1)	SEMA3	Secreted Signaling	PMID: 27533782
ClustermOli	ClusterCA2-4_neurons	SEMA3B	NRP2_PLXNA1	0.00185123	0	SEMA3B_NRP2_PLXNA1	SEMA3B - (NRP2+PLXNA1)	SEMA3	Secreted Signaling	PMID: 27533782
ClusterEpendymal	ClusterImmature	SEMA3B	NRP2_PLXNA1	0.000267146	0	SEMA3B_NRP2_PLXNA1	SEMA3B - (NRP2+PLXNA1)	SEMA3	Secreted Signaling	PMID: 27533782
ClusterNeuroblast	ClusterImmature	SEMA3B	NRP2_PLXNA1	0.00164581	0	SEMA3B_NRP2_PLXNA1	SEMA3B - (NRP2+PLXNA1)	SEMA3	Secreted Signaling	PMID: 27533782
ClustermOli	ClusterImmature	SEMA3B	NRP2_PLXNA1	0.0021601	0	SEMA3B_NRP2_PLXNA1	SEMA3B - (NRP2+PLXNA1)	SEMA3	Secreted Signaling	PMID: 27533782
ClusterEpendymal	ClusterAstrocytes	SEMA3B	NRP2_PLXNA2	0.000479635	0	SEMA3B_NRP2_PLXNA2	SEMA3B - (NRP2+PLXNA2)	SEMA3	Secreted Signaling	PMID: 27533782
ClusterNeuroblast	ClusterAstrocytes	SEMA3B	NRP2_PLXNA2	0.00295166	0	SEMA3B_NRP2_PLXNA2	SEMA3B - (NRP2+PLXNA2)	SEMA3	Secreted Signaling	PMID: 27533782
ClustermOli	ClusterAstrocytes	SEMA3B	NRP2_PLXNA2	0.00387243	0	SEMA3B_NRP2_PLXNA2	SEMA3B - (NRP2+PLXNA2)	SEMA3	Secreted Signaling	PMID: 27533782
ClusterEpendymal	ClusterCA2-4_neurons	SEMA3B	NRP2_PLXNA2	0.000709165	0	SEMA3B_NRP2_PLXNA2	SEMA3B - (NRP2+PLXNA2)	SEMA3	Secreted Signaling	PMID: 27533782
ClusterNeuroblast	ClusterCA2-4_neurons	SEMA3B	NRP2_PLXNA2	0.00435903	0	SEMA3B_NRP2_PLXNA2	SEMA3B - (NRP2+PLXNA2)	SEMA3	Secreted Signaling	PMID: 27533782
ClustermOli	ClusterCA2-4_neurons	SEMA3B	NRP2_PLXNA2	0.0057163	0	SEMA3B_NRP2_PLXNA2	SEMA3B - (NRP2+PLXNA2)	SEMA3	Secreted Signaling	PMID: 27533782
ClusterEpendymal	ClusterEndothelial	SEMA3B	NRP2_PLXNA2	0.000723876	0	SEMA3B_NRP2_PLXNA2	SEMA3B - (NRP2+PLXNA2)	SEMA3	Secreted Signaling	PMID: 27533782
ClusterNeuroblast	ClusterEndothelial	SEMA3B	NRP2_PLXNA2	0.00444911	0	SEMA3B_NRP2_PLXNA2	SEMA3B - (NRP2+PLXNA2)	SEMA3	Secreted Signaling	PMID: 27533782
ClustermOli	ClusterEndothelial	SEMA3B	NRP2_PLXNA2	0.00583427	0	SEMA3B_NRP2_PLXNA2	SEMA3B - (NRP2+PLXNA2)	SEMA3	Secreted Signaling	PMID: 27533782
ClusterEpendymal	ClusterEpendymal	SEMA3B	NRP2_PLXNA2	0.000491992	0	SEMA3B_NRP2_PLXNA2	SEMA3B - (NRP2+PLXNA2)	SEMA3	Secreted Signaling	PMID: 27533782
ClusterNeuroblast	ClusterEpendymal	SEMA3B	NRP2_PLXNA2	0.00302751	0	SEMA3B_NRP2_PLXNA2	SEMA3B - (NRP2+PLXNA2)	SEMA3	Secreted Signaling	PMID: 27533782
ClustermOli	ClusterEpendymal	SEMA3B	NRP2_PLXNA2	0.00397184	0	SEMA3B_NRP2_PLXNA2	SEMA3B - (NRP2+PLXNA2)	SEMA3	Secreted Signaling	PMID: 27533782
ClusterEpendymal	ClusterGABA_neurons	SEMA3B	NRP2_PLXNA2	0.000402737	0	SEMA3B_NRP2_PLXNA2	SEMA3B - (NRP2+PLXNA2)	SEMA3	Secreted Signaling	PMID: 27533782
ClusterNeuroblast	ClusterGABA_neurons	SEMA3B	NRP2_PLXNA2	0.00247942	0	SEMA3B_NRP2_PLXNA2	SEMA3B - (NRP2+PLXNA2)	SEMA3	Secreted Signaling	PMID: 27533782
ClustermOli	ClusterGABA_neurons	SEMA3B	NRP2_PLXNA2	0.00325334	0	SEMA3B_NRP2_PLXNA2	SEMA3B - (NRP2+PLXNA2)	SEMA3	Secreted Signaling	PMID: 27533782
ClusterEpendymal	ClusterImmature	SEMA3B	NRP2_PLXNA2	0.000942384	0	SEMA3B_NRP2_PLXNA2	SEMA3B - (NRP2+PLXNA2)	SEMA3	Secreted Signaling	PMID: 27533782
ClusterNeuroblast	ClusterImmature	SEMA3B	NRP2_PLXNA2	0.0057856	0	SEMA3B_NRP2_PLXNA2	SEMA3B - (NRP2+PLXNA2)	SEMA3	Secreted Signaling	PMID: 27533782
ClustermOli	ClusterImmature	SEMA3B	NRP2_PLXNA2	0.00758369	0	SEMA3B_NRP2_PLXNA2	SEMA3B - (NRP2+PLXNA2)	SEMA3	Secreted Signaling	PMID: 27533782
ClusterEpendymal	ClusterNeural Stem	SEMA3B	NRP2_PLXNA2	0.000527613	0	SEMA3B_NRP2_PLXNA2	SEMA3B - (NRP2+PLXNA2)	SEMA3	Secreted Signaling	PMID: 27533782
ClusterNeuroblast	ClusterNeural Stem	SEMA3B	NRP2_PLXNA2	0.00324611	0	SEMA3B_NRP2_PLXNA2	SEMA3B - (NRP2+PLXNA2)	SEMA3	Secreted Signaling	PMID: 27533782
ClustermOli	ClusterNeural Stem	SEMA3B	NRP2_PLXNA2	0.00425834	0	SEMA3B_NRP2_PLXNA2	SEMA3B - (NRP2+PLXNA2)	SEMA3	Secreted Signaling	PMID: 27533782
ClusterEpendymal	ClustermGC	SEMA3B	NRP2_PLXNA2	0.000982428	0	SEMA3B_NRP2_PLXNA2	SEMA3B - (NRP2+PLXNA2)	SEMA3	Secreted Signaling	PMID: 27533782
ClusterNeuroblast	ClustermGC	SEMA3B	NRP2_PLXNA2	0.0060302	0	SEMA3B_NRP2_PLXNA2	SEMA3B - (NRP2+PLXNA2)	SEMA3	Secreted Signaling	PMID: 27533782
ClustermOli	ClustermGC	SEMA3B	NRP2_PLXNA2	0.00790369	0	SEMA3B_NRP2_PLXNA2	SEMA3B - (NRP2+PLXNA2)	SEMA3	Secreted Signaling	PMID: 27533782
ClusterEpendymal	ClusterCA2-4_neurons	SEMA3B	NRP2_PLXNA4	0.00137855	0	SEMA3B_NRP2_PLXNA4	SEMA3B - (NRP2+PLXNA4)	SEMA3	Secreted Signaling	PMID: 27533782
ClusterNeuroblast	ClusterCA2-4_neurons	SEMA3B	NRP2_PLXNA4	0.00844445	0	SEMA3B_NRP2_PLXNA4	SEMA3B - (NRP2+PLXNA4)	SEMA3	Secreted Signaling	PMID: 27533782
ClustermOli	ClusterCA2-4_neurons	SEMA3B	NRP2_PLXNA4	0.0110597	0	SEMA3B_NRP2_PLXNA4	SEMA3B - (NRP2+PLXNA4)	SEMA3	Secreted Signaling	PMID: 27533782
ClusterEpendymal	ClusterGABA_neurons	SEMA3B	NRP2_PLXNA4	0.000556682	0	SEMA3B_NRP2_PLXNA4	SEMA3B - (NRP2+PLXNA4)	SEMA3	Secreted Signaling	PMID: 27533782
ClusterNeuroblast	ClusterGABA_neurons	SEMA3B	NRP2_PLXNA4	0.00342445	0	SEMA3B_NRP2_PLXNA4	SEMA3B - (NRP2+PLXNA4)	SEMA3	Secreted Signaling	PMID: 27533782
ClustermOli	ClusterGABA_neurons	SEMA3B	NRP2_PLXNA4	0.00449203	0	SEMA3B_NRP2_PLXNA4	SEMA3B - (NRP2+PLXNA4)	SEMA3	Secreted Signaling	PMID: 27533782
ClusterEpendymal	ClusterImmature	SEMA3B	NRP2_PLXNA4	0.00176351	0	SEMA3B_NRP2_PLXNA4	SEMA3B - (NRP2+PLXNA4)	SEMA3	Secreted Signaling	PMID: 27533782
ClusterNeuroblast	ClusterImmature	SEMA3B	NRP2_PLXNA4	0.0107812	0	SEMA3B_NRP2_PLXNA4	SEMA3B - (NRP2+PLXNA4)	SEMA3	Secreted Signaling	PMID: 27533782
ClustermOli	ClusterImmature	SEMA3B	NRP2_PLXNA4	0.0141098	0	SEMA3B_NRP2_PLXNA4	SEMA3B - (NRP2+PLXNA4)	SEMA3	Secreted Signaling	PMID: 27533782
ClusterEpendymal	ClustermGC	SEMA3B	NRP2_PLXNA4	0.00174748	0	SEMA3B_NRP2_PLXNA4	SEMA3B - (NRP2+PLXNA4)	SEMA3	Secreted Signaling	PMID: 27533782
ClusterNeuroblast	ClustermGC	SEMA3B	NRP2_PLXNA4	0.0106841	0	SEMA3B_NRP2_PLXNA4	SEMA3B - (NRP2+PLXNA4)	SEMA3	Secreted Signaling	PMID: 27533782
ClustermOli	ClustermGC	SEMA3B	NRP2_PLXNA4	0.0139832	0	SEMA3B_NRP2_PLXNA4	SEMA3B - (NRP2+PLXNA4)	SEMA3	Secreted Signaling	PMID: 27533782
ClusterImmature	ClusterCA2-4_neurons	SEMA3C	NRP2_PLXNA1	0.00599398	0	SEMA3C_NRP2_PLXNA1	SEMA3C - (NRP2+PLXNA1)	SEMA3	Secreted Signaling	PMID: 27533782
ClustermGC	ClusterCA2-4_neurons	SEMA3C	NRP2_PLXNA1	0.00591763	0	SEMA3C_NRP2_PLXNA1	SEMA3C - (NRP2+PLXNA1)	SEMA3	Secreted Signaling	PMID: 27533782
ClustermOli	ClusterCA2-4_neurons	SEMA3C	NRP2_PLXNA1	0.00212703	0	SEMA3C_NRP2_PLXNA1	SEMA3C - (NRP2+PLXNA1)	SEMA3	Secreted Signaling	PMID: 27533782
ClusterImmature	ClusterImmature	SEMA3C	NRP2_PLXNA1	0.00698922	0	SEMA3C_NRP2_PLXNA1	SEMA3C - (NRP2+PLXNA1)	SEMA3	Secreted Signaling	PMID: 27533782
ClustermGC	ClusterImmature	SEMA3C	NRP2_PLXNA1	0.00690028	0	SEMA3C_NRP2_PLXNA1	SEMA3C - (NRP2+PLXNA1)	SEMA3	Secreted Signaling	PMID: 27533782
ClustermOli	ClusterImmature	SEMA3C	NRP2_PLXNA1	0.00248181	0	SEMA3C_NRP2_PLXNA1	SEMA3C - (NRP2+PLXNA1)	SEMA3	Secreted Signaling	PMID: 27533782
ClusterImmature	ClusterAstrocytes	SEMA3C	NRP2_PLXNA2	0.0124817	0	SEMA3C_NRP2_PLXNA2	SEMA3C - (NRP2+PLXNA2)	SEMA3	Secreted Signaling	PMID: 27533782
ClustermGC	ClusterAstrocytes	SEMA3C	NRP2_PLXNA2	0.0123238	0	SEMA3C_NRP2_PLXNA2	SEMA3C - (NRP2+PLXNA2)	SEMA3	Secreted Signaling	PMID: 27533782
ClustermOli	ClusterAstrocytes	SEMA3C	NRP2_PLXNA2	0.00444801	0	SEMA3C_NRP2_PLXNA2	SEMA3C - (NRP2+PLXNA2)	SEMA3	Secreted Signaling	PMID: 27533782
ClusterImmature	ClusterCA2-4_neurons	SEMA3C	NRP2_PLXNA2	0.0183495	0	SEMA3C_NRP2_PLXNA2	SEMA3C - (NRP2+PLXNA2)	SEMA3	Secreted Signaling	PMID: 27533782
ClustermGC	ClusterCA2-4_neurons	SEMA3C	NRP2_PLXNA2	0.0181186	0	SEMA3C_NRP2_PLXNA2	SEMA3C - (NRP2+PLXNA2)	SEMA3	Secreted Signaling	PMID: 27533782
ClustermOli	ClusterCA2-4_neurons	SEMA3C	NRP2_PLXNA2	0.00656415	0	SEMA3C_NRP2_PLXNA2	SEMA3C - (NRP2+PLXNA2)	SEMA3	Secreted Signaling	PMID: 27533782
ClusterImmature	ClusterEndothelial	SEMA3C	NRP2_PLXNA2	0.0187232	0	SEMA3C_NRP2_PLXNA2	SEMA3C - (NRP2+PLXNA2)	SEMA3	Secreted Signaling	PMID: 27533782
ClustermGC	ClusterEndothelial	SEMA3C	NRP2_PLXNA2	0.0184878	0	SEMA3C_NRP2_PLXNA2	SEMA3C - (NRP2+PLXNA2)	SEMA3	Secreted Signaling	PMID: 27533782
ClustermOli	ClusterEndothelial	SEMA3C	NRP2_PLXNA2	0.0066995	0	SEMA3C_NRP2_PLXNA2	SEMA3C - (NRP2+PLXNA2)	SEMA3	Secreted Signaling	PMID: 27533782
ClusterImmature	ClusterEpendymal	SEMA3C	NRP2_PLXNA2	0.0127994	0	SEMA3C_NRP2_PLXNA2	SEMA3C - (NRP2+PLXNA2)	SEMA3	Secreted Signaling	PMID: 27533782
ClustermGC	ClusterEpendymal	SEMA3C	NRP2_PLXNA2	0.0126374	0	SEMA3C_NRP2_PLXNA2	SEMA3C - (NRP2+PLXNA2)	SEMA3	Secreted Signaling	PMID: 27533782
ClustermOli	ClusterEpendymal	SEMA3C	NRP2_PLXNA2	0.00456214	0	SEMA3C_NRP2_PLXNA2	SEMA3C - (NRP2+PLXNA2)	SEMA3	Secreted Signaling	PMID: 27533782
ClusterImmature	ClusterGABA_neurons	SEMA3C	NRP2_PLXNA2	0.0105008	0	SEMA3C_NRP2_PLXNA2	SEMA3C - (NRP2+PLXNA2)	SEMA3	Secreted Signaling	PMID: 27533782
ClustermGC	ClusterGABA_neurons	SEMA3C	NRP2_PLXNA2	0.0103677	0	SEMA3C_NRP2_PLXNA2	SEMA3C - (NRP2+PLXNA2)	SEMA3	Secreted Signaling	PMID: 27533782
ClustermOli	ClusterGABA_neurons	SEMA3C	NRP2_PLXNA2	0.00373726	0	SEMA3C_NRP2_PLXNA2	SEMA3C - (NRP2+PLXNA2)	SEMA3	Secreted Signaling	PMID: 27533782
ClusterImmature	ClusterImmature	SEMA3C	NRP2_PLXNA2	0.0242432	0	SEMA3C_NRP2_PLXNA2	SEMA3C - (NRP2+PLXNA2)	SEMA3	Secreted Signaling	PMID: 27533782
ClustermGC	ClusterImmature	SEMA3C	NRP2_PLXNA2	0.02394	0	SEMA3C_NRP2_PLXNA2	SEMA3C - (NRP2+PLXNA2)	SEMA3	Secreted Signaling	PMID: 27533782
ClustermOli	ClusterImmature	SEMA3C	NRP2_PLXNA2	0.00870608	0	SEMA3C_NRP2_PLXNA2	SEMA3C - (NRP2+PLXNA2)	SEMA3	Secreted Signaling	PMID: 27533782
ClusterImmature	ClusterNeural Stem	SEMA3C	NRP2_PLXNA2	0.0137138	0	SEMA3C_NRP2_PLXNA2	SEMA3C - (NRP2+PLXNA2)	SEMA3	Secreted Signaling	PMID: 27533782
ClustermGC	ClusterNeural Stem	SEMA3C	NRP2_PLXNA2	0.0135405	0	SEMA3C_NRP2_PLXNA2	SEMA3C - (NRP2+PLXNA2)	SEMA3	Secreted Signaling	PMID: 27533782
ClustermOli	ClusterNeural Stem	SEMA3C	NRP2_PLXNA2	0.00489101	0	SEMA3C_NRP2_PLXNA2	SEMA3C - (NRP2+PLXNA2)	SEMA3	Secreted Signaling	PMID: 27533782
ClusterImmature	ClustermGC	SEMA3C	NRP2_PLXNA2	0.0252483	0	SEMA3C_NRP2_PLXNA2	SEMA3C - (NRP2+PLXNA2)	SEMA3	Secreted Signaling	PMID: 27533782
ClustermGC	ClustermGC	SEMA3C	NRP2_PLXNA2	0.0249329	0	SEMA3C_NRP2_PLXNA2	SEMA3C - (NRP2+PLXNA2)	SEMA3	Secreted Signaling	PMID: 27533782
ClustermOli	ClustermGC	SEMA3C	NRP2_PLXNA2	0.00907302	0	SEMA3C_NRP2_PLXNA2	SEMA3C - (NRP2+PLXNA2)	SEMA3	Secreted Signaling	PMID: 27533782
ClusterImmature	ClusterCA2-4_neurons	SEMA3C	NRP2_PLXNA4	0.0350851	0	SEMA3C_NRP2_PLXNA4	SEMA3C - (NRP2+PLXNA4)	SEMA3	Secreted Signaling	PMID: 27533782
ClustermGC	ClusterCA2-4_neurons	SEMA3C	NRP2_PLXNA4	0.0346511	0	SEMA3C_NRP2_PLXNA4	SEMA3C - (NRP2+PLXNA4)	SEMA3	Secreted Signaling	PMID: 27533782
ClustermOli	ClusterCA2-4_neurons	SEMA3C	NRP2_PLXNA4	0.0126899	0	SEMA3C_NRP2_PLXNA4	SEMA3C - (NRP2+PLXNA4)	SEMA3	Secreted Signaling	PMID: 27533782
ClusterImmature	ClusterGABA_neurons	SEMA3C	NRP2_PLXNA4	0.0144589	0	SEMA3C_NRP2_PLXNA4	SEMA3C - (NRP2+PLXNA4)	SEMA3	Secreted Signaling	PMID: 27533782
ClustermGC	ClusterGABA_neurons	SEMA3C	NRP2_PLXNA4	0.0142763	0	SEMA3C_NRP2_PLXNA4	SEMA3C - (NRP2+PLXNA4)	SEMA3	Secreted Signaling	PMID: 27533782
ClustermOli	ClusterGABA_neurons	SEMA3C	NRP2_PLXNA4	0.00515924	0	SEMA3C_NRP2_PLXNA4	SEMA3C - (NRP2+PLXNA4)	SEMA3	Secreted Signaling	PMID: 27533782
ClusterImmature	ClusterImmature	SEMA3C	NRP2_PLXNA4	0.0444633	0	SEMA3C_NRP2_PLXNA4	SEMA3C - (NRP2+PLXNA4)	SEMA3	Secreted Signaling	PMID: 27533782
ClustermGC	ClusterImmature	SEMA3C	NRP2_PLXNA4	0.0439186	0	SEMA3C_NRP2_PLXNA4	SEMA3C - (NRP2+PLXNA4)	SEMA3	Secreted Signaling	PMID: 27533782
ClustermOli	ClusterImmature	SEMA3C	NRP2_PLXNA4	0.0161823	0	SEMA3C_NRP2_PLXNA4	SEMA3C - (NRP2+PLXNA4)	SEMA3	Secreted Signaling	PMID: 27533782
ClusterImmature	ClustermGC	SEMA3C	NRP2_PLXNA4	0.0440764	0	SEMA3C_NRP2_PLXNA4	SEMA3C - (NRP2+PLXNA4)	SEMA3	Secreted Signaling	PMID: 27533782
ClustermGC	ClustermGC	SEMA3C	NRP2_PLXNA4	0.0435362	0	SEMA3C_NRP2_PLXNA4	SEMA3C - (NRP2+PLXNA4)	SEMA3	Secreted Signaling	PMID: 27533782
ClustermOli	ClustermGC	SEMA3C	NRP2_PLXNA4	0.0160374	0	SEMA3C_NRP2_PLXNA4	SEMA3C - (NRP2+PLXNA4)	SEMA3	Secreted Signaling	PMID: 27533782
ClusterCA_neurons	ClusterCA2-4_neurons	SEMA3D	NRP2_PLXNA1	0.00100928	0	SEMA3D_NRP2_PLXNA1	SEMA3D - (NRP2+PLXNA1)	SEMA3	Secreted Signaling	PMID: 27533782
ClusterEpendymal	ClusterCA2-4_neurons	SEMA3D	NRP2_PLXNA1	0.000488528	0	SEMA3D_NRP2_PLXNA1	SEMA3D - (NRP2+PLXNA1)	SEMA3	Secreted Signaling	PMID: 27533782
ClusterCA_neurons	ClusterImmature	SEMA3D	NRP2_PLXNA1	0.00117785	0	SEMA3D_NRP2_PLXNA1	SEMA3D - (NRP2+PLXNA1)	SEMA3	Secreted Signaling	PMID: 27533782
ClusterEpendymal	ClusterImmature	SEMA3D	NRP2_PLXNA1	0.000570168	0	SEMA3D_NRP2_PLXNA1	SEMA3D - (NRP2+PLXNA1)	SEMA3	Secreted Signaling	PMID: 27533782
ClusterCA_neurons	ClusterAstrocytes	SEMA3D	NRP2_PLXNA2	0.00211318	0	SEMA3D_NRP2_PLXNA2	SEMA3D - (NRP2+PLXNA2)	SEMA3	Secreted Signaling	PMID: 27533782
ClusterEpendymal	ClusterAstrocytes	SEMA3D	NRP2_PLXNA2	0.00102344	0	SEMA3D_NRP2_PLXNA2	SEMA3D - (NRP2+PLXNA2)	SEMA3	Secreted Signaling	PMID: 27533782
ClusterCA_neurons	ClusterCA2-4_neurons	SEMA3D	NRP2_PLXNA2	0.00312201	0	SEMA3D_NRP2_PLXNA2	SEMA3D - (NRP2+PLXNA2)	SEMA3	Secreted Signaling	PMID: 27533782
ClusterEpendymal	ClusterCA2-4_neurons	SEMA3D	NRP2_PLXNA2	0.00151281	0	SEMA3D_NRP2_PLXNA2	SEMA3D - (NRP2+PLXNA2)	SEMA3	Secreted Signaling	PMID: 27533782
ClusterCA_neurons	ClusterEndothelial	SEMA3D	NRP2_PLXNA2	0.00318661	0	SEMA3D_NRP2_PLXNA2	SEMA3D - (NRP2+PLXNA2)	SEMA3	Secreted Signaling	PMID: 27533782
ClusterEpendymal	ClusterEndothelial	SEMA3D	NRP2_PLXNA2	0.00154417	0	SEMA3D_NRP2_PLXNA2	SEMA3D - (NRP2+PLXNA2)	SEMA3	Secreted Signaling	PMID: 27533782
ClusterCA_neurons	ClusterEpendymal	SEMA3D	NRP2_PLXNA2	0.00216753	0	SEMA3D_NRP2_PLXNA2	SEMA3D - (NRP2+PLXNA2)	SEMA3	Secreted Signaling	PMID: 27533782
ClusterEpendymal	ClusterEpendymal	SEMA3D	NRP2_PLXNA2	0.00104979	0	SEMA3D_NRP2_PLXNA2	SEMA3D - (NRP2+PLXNA2)	SEMA3	Secreted Signaling	PMID: 27533782
ClusterCA_neurons	ClusterGABA_neurons	SEMA3D	NRP2_PLXNA2	0.00177485	0	SEMA3D_NRP2_PLXNA2	SEMA3D - (NRP2+PLXNA2)	SEMA3	Secreted Signaling	PMID: 27533782
ClusterEpendymal	ClusterGABA_neurons	SEMA3D	NRP2_PLXNA2	0.000859428	0	SEMA3D_NRP2_PLXNA2	SEMA3D - (NRP2+PLXNA2)	SEMA3	Secreted Signaling	PMID: 27533782
ClusterCA_neurons	ClusterImmature	SEMA3D	NRP2_PLXNA2	0.00414543	0	SEMA3D_NRP2_PLXNA2	SEMA3D - (NRP2+PLXNA2)	SEMA3	Secreted Signaling	PMID: 27533782
ClusterEpendymal	ClusterImmature	SEMA3D	NRP2_PLXNA2	0.00200979	0	SEMA3D_NRP2_PLXNA2	SEMA3D - (NRP2+PLXNA2)	SEMA3	Secreted Signaling	PMID: 27533782
ClusterCA_neurons	ClusterNeural Stem	SEMA3D	NRP2_PLXNA2	0.00232418	0	SEMA3D_NRP2_PLXNA2	SEMA3D - (NRP2+PLXNA2)	SEMA3	Secreted Signaling	PMID: 27533782
ClusterEpendymal	ClusterNeural Stem	SEMA3D	NRP2_PLXNA2	0.00112575	0	SEMA3D_NRP2_PLXNA2	SEMA3D - (NRP2+PLXNA2)	SEMA3	Secreted Signaling	PMID: 27533782
ClusterCA_neurons	ClustermGC	SEMA3D	NRP2_PLXNA2	0.00432099	0	SEMA3D_NRP2_PLXNA2	SEMA3D - (NRP2+PLXNA2)	SEMA3	Secreted Signaling	PMID: 27533782
ClusterEpendymal	ClustermGC	SEMA3D	NRP2_PLXNA2	0.00209509	0	SEMA3D_NRP2_PLXNA2	SEMA3D - (NRP2+PLXNA2)	SEMA3	Secreted Signaling	PMID: 27533782
ClusterCA_neurons	ClusterCA2-4_neurons	SEMA3D	NRP2_PLXNA4	0.00605511	0	SEMA3D_NRP2_PLXNA4	SEMA3D - (NRP2+PLXNA4)	SEMA3	Secreted Signaling	PMID: 27533782
ClusterEpendymal	ClusterCA2-4_neurons	SEMA3D	NRP2_PLXNA4	0.00293854	0	SEMA3D_NRP2_PLXNA4	SEMA3D - (NRP2+PLXNA4)	SEMA3	Secreted Signaling	PMID: 27533782
ClusterCA_neurons	ClusterGABA_neurons	SEMA3D	NRP2_PLXNA4	0.00245199	0	SEMA3D_NRP2_PLXNA4	SEMA3D - (NRP2+PLXNA4)	SEMA3	Secreted Signaling	PMID: 27533782
ClusterEpendymal	ClusterGABA_neurons	SEMA3D	NRP2_PLXNA4	0.00118773	0	SEMA3D_NRP2_PLXNA4	SEMA3D - (NRP2+PLXNA4)	SEMA3	Secreted Signaling	PMID: 27533782
ClusterCA_neurons	ClusterImmature	SEMA3D	NRP2_PLXNA4	0.00773584	0	SEMA3D_NRP2_PLXNA4	SEMA3D - (NRP2+PLXNA4)	SEMA3	Secreted Signaling	PMID: 27533782
ClusterEpendymal	ClusterImmature	SEMA3D	NRP2_PLXNA4	0.00375747	0	SEMA3D_NRP2_PLXNA4	SEMA3D - (NRP2+PLXNA4)	SEMA3	Secreted Signaling	PMID: 27533782
ClusterCA_neurons	ClustermGC	SEMA3D	NRP2_PLXNA4	0.00766596	0	SEMA3D_NRP2_PLXNA4	SEMA3D - (NRP2+PLXNA4)	SEMA3	Secreted Signaling	PMID: 27533782
ClusterEpendymal	ClustermGC	SEMA3D	NRP2_PLXNA4	0.00372339	0	SEMA3D_NRP2_PLXNA4	SEMA3D - (NRP2+PLXNA4)	SEMA3	Secreted Signaling	PMID: 27533782
ClusterImmature	ClusterEndothelial	SEMA3C	NRP1_NRP2	0.00861323	0	SEMA3C_NRP1_NRP2	SEMA3C - (NRP1+NRP2)	SEMA3	Secreted Signaling	PMID: 27533782
ClustermGC	ClusterEndothelial	SEMA3C	NRP1_NRP2	0.0085038	0	SEMA3C_NRP1_NRP2	SEMA3C - (NRP1+NRP2)	SEMA3	Secreted Signaling	PMID: 27533782
ClustermOli	ClusterEndothelial	SEMA3C	NRP1_NRP2	0.0030617	0	SEMA3C_NRP1_NRP2	SEMA3C - (NRP1+NRP2)	SEMA3	Secreted Signaling	PMID: 27533782
ClusterImmature	ClusterEndothelial	SEMA3C	PLXND1	0.00471685	0	SEMA3C_PLXND1	SEMA3C - PLXND1	SEMA3	Secreted Signaling	PMID: 27533782
ClustermGC	ClusterEndothelial	SEMA3C	PLXND1	0.00465669	0	SEMA3C_PLXND1	SEMA3C - PLXND1	SEMA3	Secreted Signaling	PMID: 27533782
ClustermOli	ClusterEndothelial	SEMA3C	PLXND1	0.00167244	0	SEMA3C_PLXND1	SEMA3C - PLXND1	SEMA3	Secreted Signaling	PMID: 27533782
ClusterCA2-4_neurons	ClusterEndothelial	SEMA3E	PLXND1	0.000775587	0	SEMA3E_PLXND1	SEMA3E - PLXND1	SEMA3	Secreted Signaling	PMID: 22325954
ClusterOPCs	ClusterEndothelial	SEMA3E	PLXND1	0.00194444	0	SEMA3E_PLXND1	SEMA3E - PLXND1	SEMA3	Secreted Signaling	PMID: 22325954
ClusterAstrocytes	ClusterCA2-4_neurons	AGT	MAS1	0.000769083	0	AGT_MAS1	AGT - MAS1	AGT	Secreted Signaling	KEGG: hsa04080
ClusterEpendymal	ClusterCA2-4_neurons	AGT	MAS1	0.00131808	0	AGT_MAS1	AGT - MAS1	AGT	Secreted Signaling	KEGG: hsa04080
ClusterNeural Stem	ClusterCA2-4_neurons	AGT	MAS1	0.000641917	0	AGT_MAS1	AGT - MAS1	AGT	Secreted Signaling	KEGG: hsa04080
ClusterAstrocytes	ClusterImmature	AGT	MAS1	0.00103887	0	AGT_MAS1	AGT - MAS1	AGT	Secreted Signaling	KEGG: hsa04080
ClusterEpendymal	ClusterImmature	AGT	MAS1	0.00178011	0	AGT_MAS1	AGT - MAS1	AGT	Secreted Signaling	KEGG: hsa04080
ClusterNeural Stem	ClusterImmature	AGT	MAS1	0.000867133	0	AGT_MAS1	AGT - MAS1	AGT	Secreted Signaling	KEGG: hsa04080
ClusterEpendymal	ClusterCA2-4_neurons	ENHO	GPR19	8.45713e-05	0	ENHO_GPR19	ENHO - GPR19	ENHO	Secreted Signaling	PMID: 28476646
ClusterEpendymal	ClusterCA_neurons	ENHO	GPR19	0.000121406	0	ENHO_GPR19	ENHO - GPR19	ENHO	Secreted Signaling	PMID: 28476646
ClusterEpendymal	ClusterImmature	ENHO	GPR19	0.00017034	0	ENHO_GPR19	ENHO - GPR19	ENHO	Secreted Signaling	PMID: 28476646
ClusterEpendymal	ClustermGC	ENHO	GPR19	0.000184279	0	ENHO_GPR19	ENHO - GPR19	ENHO	Secreted Signaling	PMID: 28476646
ClusterCA2-4_neurons	ClusterEndothelial	GAS6	AXL	9.98848e-05	0	GAS6_AXL	GAS6 - AXL	GAS	Secreted Signaling	PMID: 27801848
ClusterCA_neurons	ClusterEndothelial	GAS6	AXL	0.000126166	0	GAS6_AXL	GAS6 - AXL	GAS	Secreted Signaling	PMID: 27801848
ClusterEndothelial	ClusterEndothelial	GAS6	AXL	0.000314281	0	GAS6_AXL	GAS6 - AXL	GAS	Secreted Signaling	PMID: 27801848
ClusterEpendymal	ClusterEndothelial	GAS6	AXL	0.000312834	0	GAS6_AXL	GAS6 - AXL	GAS	Secreted Signaling	PMID: 27801848
ClusterGABA_neurons	ClusterEndothelial	GAS6	AXL	0.000198688	0	GAS6_AXL	GAS6 - AXL	GAS	Secreted Signaling	PMID: 27801848
ClusterCA2-4_neurons	ClusterAstrocytes	GAS6	MERTK	0.000621381	0	GAS6_MERTK	GAS6 - MERTK	GAS	Secreted Signaling	PMID: 27801848
ClusterCA_neurons	ClusterAstrocytes	GAS6	MERTK	0.000784767	0	GAS6_MERTK	GAS6 - MERTK	GAS	Secreted Signaling	PMID: 27801848
ClusterEndothelial	ClusterAstrocytes	GAS6	MERTK	0.00195295	0	GAS6_MERTK	GAS6 - MERTK	GAS	Secreted Signaling	PMID: 27801848
ClusterEpendymal	ClusterAstrocytes	GAS6	MERTK	0.00194397	0	GAS6_MERTK	GAS6 - MERTK	GAS	Secreted Signaling	PMID: 27801848
ClusterGABA_neurons	ClusterAstrocytes	GAS6	MERTK	0.0012354	0	GAS6_MERTK	GAS6 - MERTK	GAS	Secreted Signaling	PMID: 27801848
ClusterCA2-4_neurons	ClusterEndothelial	GAS6	MERTK	0.000486091	0	GAS6_MERTK	GAS6 - MERTK	GAS	Secreted Signaling	PMID: 27801848
ClusterCA_neurons	ClusterEndothelial	GAS6	MERTK	0.000613926	0	GAS6_MERTK	GAS6 - MERTK	GAS	Secreted Signaling	PMID: 27801848
ClusterEndothelial	ClusterEndothelial	GAS6	MERTK	0.00152819	0	GAS6_MERTK	GAS6 - MERTK	GAS	Secreted Signaling	PMID: 27801848
ClusterEpendymal	ClusterEndothelial	GAS6	MERTK	0.00152116	0	GAS6_MERTK	GAS6 - MERTK	GAS	Secreted Signaling	PMID: 27801848
ClusterGABA_neurons	ClusterEndothelial	GAS6	MERTK	0.000966552	0	GAS6_MERTK	GAS6 - MERTK	GAS	Secreted Signaling	PMID: 27801848
ClusterCA2-4_neurons	ClusterEpendymal	GAS6	MERTK	0.000349572	0	GAS6_MERTK	GAS6 - MERTK	GAS	Secreted Signaling	PMID: 27801848
ClusterCA_neurons	ClusterEpendymal	GAS6	MERTK	0.000441519	0	GAS6_MERTK	GAS6 - MERTK	GAS	Secreted Signaling	PMID: 27801848
ClusterEndothelial	ClusterEpendymal	GAS6	MERTK	0.00109932	0	GAS6_MERTK	GAS6 - MERTK	GAS	Secreted Signaling	PMID: 27801848
ClusterEpendymal	ClusterEpendymal	GAS6	MERTK	0.00109426	0	GAS6_MERTK	GAS6 - MERTK	GAS	Secreted Signaling	PMID: 27801848
ClusterGABA_neurons	ClusterEpendymal	GAS6	MERTK	0.000695187	0	GAS6_MERTK	GAS6 - MERTK	GAS	Secreted Signaling	PMID: 27801848
ClusterCA2-4_neurons	ClusterMicroglia	GAS6	MERTK	0.00241612	0	GAS6_MERTK	GAS6 - MERTK	GAS	Secreted Signaling	PMID: 27801848
ClusterCA_neurons	ClusterMicroglia	GAS6	MERTK	0.00304997	0	GAS6_MERTK	GAS6 - MERTK	GAS	Secreted Signaling	PMID: 27801848
ClusterEndothelial	ClusterMicroglia	GAS6	MERTK	0.00756455	0	GAS6_MERTK	GAS6 - MERTK	GAS	Secreted Signaling	PMID: 27801848
ClusterEpendymal	ClusterMicroglia	GAS6	MERTK	0.00752996	0	GAS6_MERTK	GAS6 - MERTK	GAS	Secreted Signaling	PMID: 27801848
ClusterGABA_neurons	ClusterMicroglia	GAS6	MERTK	0.00479509	0	GAS6_MERTK	GAS6 - MERTK	GAS	Secreted Signaling	PMID: 27801848
ClusterCA2-4_neurons	ClusterNeural Stem	GAS6	MERTK	0.000622002	0	GAS6_MERTK	GAS6 - MERTK	GAS	Secreted Signaling	PMID: 27801848
ClusterCA_neurons	ClusterNeural Stem	GAS6	MERTK	0.000785551	0	GAS6_MERTK	GAS6 - MERTK	GAS	Secreted Signaling	PMID: 27801848
ClusterEndothelial	ClusterNeural Stem	GAS6	MERTK	0.0019549	0	GAS6_MERTK	GAS6 - MERTK	GAS	Secreted Signaling	PMID: 27801848
ClusterEpendymal	ClusterNeural Stem	GAS6	MERTK	0.00194591	0	GAS6_MERTK	GAS6 - MERTK	GAS	Secreted Signaling	PMID: 27801848
ClusterGABA_neurons	ClusterNeural Stem	GAS6	MERTK	0.00123663	0	GAS6_MERTK	GAS6 - MERTK	GAS	Secreted Signaling	PMID: 27801848
ClusterCA2-4_neurons	ClusterCA2-4_neurons	GAS6	TYRO3	6.80768e-05	0	GAS6_TYRO3	GAS6 - TYRO3	GAS	Secreted Signaling	PMID: 27801848
ClusterCA_neurons	ClusterCA2-4_neurons	GAS6	TYRO3	8.59894e-05	0	GAS6_TYRO3	GAS6 - TYRO3	GAS	Secreted Signaling	PMID: 27801848
ClusterEndothelial	ClusterCA2-4_neurons	GAS6	TYRO3	0.000214214	0	GAS6_TYRO3	GAS6 - TYRO3	GAS	Secreted Signaling	PMID: 27801848
ClusterEpendymal	ClusterCA2-4_neurons	GAS6	TYRO3	0.000213227	0	GAS6_TYRO3	GAS6 - TYRO3	GAS	Secreted Signaling	PMID: 27801848
ClusterGABA_neurons	ClusterCA2-4_neurons	GAS6	TYRO3	0.000135421	0	GAS6_TYRO3	GAS6 - TYRO3	GAS	Secreted Signaling	PMID: 27801848
ClusterCA2-4_neurons	ClusterCA_neurons	GAS6	TYRO3	0.000499199	0	GAS6_TYRO3	GAS6 - TYRO3	GAS	Secreted Signaling	PMID: 27801848
ClusterCA_neurons	ClusterCA_neurons	GAS6	TYRO3	0.000630478	0	GAS6_TYRO3	GAS6 - TYRO3	GAS	Secreted Signaling	PMID: 27801848
ClusterEndothelial	ClusterCA_neurons	GAS6	TYRO3	0.00156935	0	GAS6_TYRO3	GAS6 - TYRO3	GAS	Secreted Signaling	PMID: 27801848
ClusterEpendymal	ClusterCA_neurons	GAS6	TYRO3	0.00156213	0	GAS6_TYRO3	GAS6 - TYRO3	GAS	Secreted Signaling	PMID: 27801848
ClusterGABA_neurons	ClusterCA_neurons	GAS6	TYRO3	0.000992602	0	GAS6_TYRO3	GAS6 - TYRO3	GAS	Secreted Signaling	PMID: 27801848
ClusterCA2-4_neurons	ClusterEpendymal	GAS6	TYRO3	2.69265e-05	0	GAS6_TYRO3	GAS6 - TYRO3	GAS	Secreted Signaling	PMID: 27801848
ClusterCA_neurons	ClusterEpendymal	GAS6	TYRO3	3.40119e-05	0	GAS6_TYRO3	GAS6 - TYRO3	GAS	Secreted Signaling	PMID: 27801848
ClusterEndothelial	ClusterEpendymal	GAS6	TYRO3	8.47359e-05	0	GAS6_TYRO3	GAS6 - TYRO3	GAS	Secreted Signaling	PMID: 27801848
ClusterEpendymal	ClusterEpendymal	GAS6	TYRO3	8.43455e-05	0	GAS6_TYRO3	GAS6 - TYRO3	GAS	Secreted Signaling	PMID: 27801848
ClusterGABA_neurons	ClusterEpendymal	GAS6	TYRO3	5.35654e-05	0	GAS6_TYRO3	GAS6 - TYRO3	GAS	Secreted Signaling	PMID: 27801848
ClusterCA2-4_neurons	ClusterImmature	GAS6	TYRO3	0.000152663	0	GAS6_TYRO3	GAS6 - TYRO3	GAS	Secreted Signaling	PMID: 27801848
ClusterCA_neurons	ClusterImmature	GAS6	TYRO3	0.000192828	0	GAS6_TYRO3	GAS6 - TYRO3	GAS	Secreted Signaling	PMID: 27801848
ClusterEndothelial	ClusterImmature	GAS6	TYRO3	0.00048029	0	GAS6_TYRO3	GAS6 - TYRO3	GAS	Secreted Signaling	PMID: 27801848
ClusterEpendymal	ClusterImmature	GAS6	TYRO3	0.000478079	0	GAS6_TYRO3	GAS6 - TYRO3	GAS	Secreted Signaling	PMID: 27801848
ClusterGABA_neurons	ClusterImmature	GAS6	TYRO3	0.000303658	0	GAS6_TYRO3	GAS6 - TYRO3	GAS	Secreted Signaling	PMID: 27801848
ClusterCA2-4_neurons	ClusterEndothelial	PROS1	AXL	0.000235516	0	PROS1_AXL	PROS1 - AXL	PROS	Secreted Signaling	PMID: 29531161
ClusterCA_neurons	ClusterEndothelial	PROS1	AXL	0.000270715	0	PROS1_AXL	PROS1 - AXL	PROS	Secreted Signaling	PMID: 29531161
ClusterEndothelial	ClusterEndothelial	PROS1	AXL	0.00056158	0	PROS1_AXL	PROS1 - AXL	PROS	Secreted Signaling	PMID: 29531161
ClusterEpendymal	ClusterEndothelial	PROS1	AXL	0.00201524	0	PROS1_AXL	PROS1 - AXL	PROS	Secreted Signaling	PMID: 29531161
ClusterImmature	ClusterEndothelial	PROS1	AXL	0.000255196	0	PROS1_AXL	PROS1 - AXL	PROS	Secreted Signaling	PMID: 29531161
ClustermGC	ClusterEndothelial	PROS1	AXL	0.000249219	0	PROS1_AXL	PROS1 - AXL	PROS	Secreted Signaling	PMID: 29531161
ClusterCA2-4_neurons	ClusterCA2-4_neurons	PROS1	TYRO3	0.000160523	0	PROS1_TYRO3	PROS1 - TYRO3	PROS	Secreted Signaling	PMID: 30501104
ClusterCA_neurons	ClusterCA2-4_neurons	PROS1	TYRO3	0.000184517	0	PROS1_TYRO3	PROS1 - TYRO3	PROS	Secreted Signaling	PMID: 30501104
ClusterEndothelial	ClusterCA2-4_neurons	PROS1	TYRO3	0.000382803	0	PROS1_TYRO3	PROS1 - TYRO3	PROS	Secreted Signaling	PMID: 30501104
ClusterEpendymal	ClusterCA2-4_neurons	PROS1	TYRO3	0.00137433	0	PROS1_TYRO3	PROS1 - TYRO3	PROS	Secreted Signaling	PMID: 30501104
ClusterImmature	ClusterCA2-4_neurons	PROS1	TYRO3	0.000173938	0	PROS1_TYRO3	PROS1 - TYRO3	PROS	Secreted Signaling	PMID: 30501104
ClustermGC	ClusterCA2-4_neurons	PROS1	TYRO3	0.000169864	0	PROS1_TYRO3	PROS1 - TYRO3	PROS	Secreted Signaling	PMID: 30501104
ClusterCA2-4_neurons	ClusterCA_neurons	PROS1	TYRO3	0.00117641	0	PROS1_TYRO3	PROS1 - TYRO3	PROS	Secreted Signaling	PMID: 30501104
ClusterCA_neurons	ClusterCA_neurons	PROS1	TYRO3	0.00135204	0	PROS1_TYRO3	PROS1 - TYRO3	PROS	Secreted Signaling	PMID: 30501104
ClusterEndothelial	ClusterCA_neurons	PROS1	TYRO3	0.00280147	0	PROS1_TYRO3	PROS1 - TYRO3	PROS	Secreted Signaling	PMID: 30501104
ClusterEpendymal	ClusterCA_neurons	PROS1	TYRO3	0.00999511	0	PROS1_TYRO3	PROS1 - TYRO3	PROS	Secreted Signaling	PMID: 30501104
ClusterImmature	ClusterCA_neurons	PROS1	TYRO3	0.00127461	0	PROS1_TYRO3	PROS1 - TYRO3	PROS	Secreted Signaling	PMID: 30501104
ClustermGC	ClusterCA_neurons	PROS1	TYRO3	0.00124479	0	PROS1_TYRO3	PROS1 - TYRO3	PROS	Secreted Signaling	PMID: 30501104
ClusterCA2-4_neurons	ClusterEpendymal	PROS1	TYRO3	6.34956e-05	0	PROS1_TYRO3	PROS1 - TYRO3	PROS	Secreted Signaling	PMID: 30501104
ClusterCA_neurons	ClusterEpendymal	PROS1	TYRO3	7.29874e-05	0	PROS1_TYRO3	PROS1 - TYRO3	PROS	Secreted Signaling	PMID: 30501104
ClusterEndothelial	ClusterEpendymal	PROS1	TYRO3	0.00015144	0	PROS1_TYRO3	PROS1 - TYRO3	PROS	Secreted Signaling	PMID: 30501104
ClusterEpendymal	ClusterEpendymal	PROS1	TYRO3	0.000544021	0	PROS1_TYRO3	PROS1 - TYRO3	PROS	Secreted Signaling	PMID: 30501104
ClusterImmature	ClusterEpendymal	PROS1	TYRO3	6.88023e-05	0	PROS1_TYRO3	PROS1 - TYRO3	PROS	Secreted Signaling	PMID: 30501104
ClustermGC	ClusterEpendymal	PROS1	TYRO3	6.71908e-05	0	PROS1_TYRO3	PROS1 - TYRO3	PROS	Secreted Signaling	PMID: 30501104
ClusterCA2-4_neurons	ClusterImmature	PROS1	TYRO3	0.000359934	0	PROS1_TYRO3	PROS1 - TYRO3	PROS	Secreted Signaling	PMID: 30501104
ClusterCA_neurons	ClusterImmature	PROS1	TYRO3	0.000413722	0	PROS1_TYRO3	PROS1 - TYRO3	PROS	Secreted Signaling	PMID: 30501104
ClusterEndothelial	ClusterImmature	PROS1	TYRO3	0.000858105	0	PROS1_TYRO3	PROS1 - TYRO3	PROS	Secreted Signaling	PMID: 30501104
ClusterEpendymal	ClusterImmature	PROS1	TYRO3	0.00307696	0	PROS1_TYRO3	PROS1 - TYRO3	PROS	Secreted Signaling	PMID: 30501104
ClusterImmature	ClusterImmature	PROS1	TYRO3	0.000390007	0	PROS1_TYRO3	PROS1 - TYRO3	PROS	Secreted Signaling	PMID: 30501104
ClustermGC	ClusterImmature	PROS1	TYRO3	0.000380874	0	PROS1_TYRO3	PROS1 - TYRO3	PROS	Secreted Signaling	PMID: 30501104
ClusterAstrocytes	ClusterEpendymal	PSAP	GPR37L1	0.00427891	0	PSAP_GPR37L1	PSAP - GPR37L1	PSAP	Secreted Signaling	PMID: 23690594
ClusterCA2-4_neurons	ClusterEpendymal	PSAP	GPR37L1	0.00269624	0	PSAP_GPR37L1	PSAP - GPR37L1	PSAP	Secreted Signaling	PMID: 23690594
ClusterCA_neurons	ClusterEpendymal	PSAP	GPR37L1	0.00235845	0	PSAP_GPR37L1	PSAP - GPR37L1	PSAP	Secreted Signaling	PMID: 23690594
ClusterEndothelial	ClusterEpendymal	PSAP	GPR37L1	0.00427266	0	PSAP_GPR37L1	PSAP - GPR37L1	PSAP	Secreted Signaling	PMID: 23690594
ClusterEpendymal	ClusterEpendymal	PSAP	GPR37L1	0.00665342	0	PSAP_GPR37L1	PSAP - GPR37L1	PSAP	Secreted Signaling	PMID: 23690594
ClusterGABA_neurons	ClusterEpendymal	PSAP	GPR37L1	0.00285724	0	PSAP_GPR37L1	PSAP - GPR37L1	PSAP	Secreted Signaling	PMID: 23690594
ClusterImmature	ClusterEpendymal	PSAP	GPR37L1	0.00493454	0	PSAP_GPR37L1	PSAP - GPR37L1	PSAP	Secreted Signaling	PMID: 23690594
ClusterMicroglia	ClusterEpendymal	PSAP	GPR37L1	0.00487606	0	PSAP_GPR37L1	PSAP - GPR37L1	PSAP	Secreted Signaling	PMID: 23690594
ClusterNeural Stem	ClusterEpendymal	PSAP	GPR37L1	0.00288535	0	PSAP_GPR37L1	PSAP - GPR37L1	PSAP	Secreted Signaling	PMID: 23690594
ClusterNeuroblast	ClusterEpendymal	PSAP	GPR37L1	0.00566675	0	PSAP_GPR37L1	PSAP - GPR37L1	PSAP	Secreted Signaling	PMID: 23690594
ClusterOPCs	ClusterEpendymal	PSAP	GPR37L1	0.00296583	0	PSAP_GPR37L1	PSAP - GPR37L1	PSAP	Secreted Signaling	PMID: 23690594
ClustermGC	ClusterEpendymal	PSAP	GPR37L1	0.00332487	0	PSAP_GPR37L1	PSAP - GPR37L1	PSAP	Secreted Signaling	PMID: 23690594
ClustermOli	ClusterEpendymal	PSAP	GPR37L1	0.00177968	0	PSAP_GPR37L1	PSAP - GPR37L1	PSAP	Secreted Signaling	PMID: 23690594
ClusterAstrocytes	ClusterOPCs	PSAP	GPR37L1	0.00733016	0	PSAP_GPR37L1	PSAP - GPR37L1	PSAP	Secreted Signaling	PMID: 23690594
ClusterCA2-4_neurons	ClusterOPCs	PSAP	GPR37L1	0.00462415	0	PSAP_GPR37L1	PSAP - GPR37L1	PSAP	Secreted Signaling	PMID: 23690594
ClusterCA_neurons	ClusterOPCs	PSAP	GPR37L1	0.00404581	0	PSAP_GPR37L1	PSAP - GPR37L1	PSAP	Secreted Signaling	PMID: 23690594
ClusterEndothelial	ClusterOPCs	PSAP	GPR37L1	0.0073195	0	PSAP_GPR37L1	PSAP - GPR37L1	PSAP	Secreted Signaling	PMID: 23690594
ClusterEpendymal	ClusterOPCs	PSAP	GPR37L1	0.0113786	0	PSAP_GPR37L1	PSAP - GPR37L1	PSAP	Secreted Signaling	PMID: 23690594
ClusterGABA_neurons	ClusterOPCs	PSAP	GPR37L1	0.00489971	0	PSAP_GPR37L1	PSAP - GPR37L1	PSAP	Secreted Signaling	PMID: 23690594
ClusterImmature	ClusterOPCs	PSAP	GPR37L1	0.00844935	0	PSAP_GPR37L1	PSAP - GPR37L1	PSAP	Secreted Signaling	PMID: 23690594
ClusterMicroglia	ClusterOPCs	PSAP	GPR37L1	0.00834957	0	PSAP_GPR37L1	PSAP - GPR37L1	PSAP	Secreted Signaling	PMID: 23690594
ClusterNeural Stem	ClusterOPCs	PSAP	GPR37L1	0.0049478	0	PSAP_GPR37L1	PSAP - GPR37L1	PSAP	Secreted Signaling	PMID: 23690594
ClusterNeuroblast	ClusterOPCs	PSAP	GPR37L1	0.00969803	0	PSAP_GPR37L1	PSAP - GPR37L1	PSAP	Secreted Signaling	PMID: 23690594
ClusterOPCs	ClusterOPCs	PSAP	GPR37L1	0.00508553	0	PSAP_GPR37L1	PSAP - GPR37L1	PSAP	Secreted Signaling	PMID: 23690594
ClustermGC	ClusterOPCs	PSAP	GPR37L1	0.0056997	0	PSAP_GPR37L1	PSAP - GPR37L1	PSAP	Secreted Signaling	PMID: 23690594
ClustermOli	ClusterOPCs	PSAP	GPR37L1	0.00305422	0	PSAP_GPR37L1	PSAP - GPR37L1	PSAP	Secreted Signaling	PMID: 23690594
ClusterAstrocytes	ClusterNeuroblast	PSAP	GPR37	0.032147	0	PSAP_GPR37	PSAP - GPR37	PSAP	Secreted Signaling	PMID: 23690594
ClusterCA2-4_neurons	ClusterNeuroblast	PSAP	GPR37	0.0204685	0	PSAP_GPR37	PSAP - GPR37	PSAP	Secreted Signaling	PMID: 23690594
ClusterCA_neurons	ClusterNeuroblast	PSAP	GPR37	0.0179442	0	PSAP_GPR37	PSAP - GPR37	PSAP	Secreted Signaling	PMID: 23690594
ClusterEndothelial	ClusterNeuroblast	PSAP	GPR37	0.0321014	0	PSAP_GPR37	PSAP - GPR37	PSAP	Secreted Signaling	PMID: 23690594
ClusterEpendymal	ClusterNeuroblast	PSAP	GPR37	0.0492219	0	PSAP_GPR37	PSAP - GPR37	PSAP	Secreted Signaling	PMID: 23690594
ClusterGABA_neurons	ClusterNeuroblast	PSAP	GPR37	0.0216676	0	PSAP_GPR37	PSAP - GPR37	PSAP	Secreted Signaling	PMID: 23690594
ClusterImmature	ClusterNeuroblast	PSAP	GPR37	0.0369143	0	PSAP_GPR37	PSAP - GPR37	PSAP	Secreted Signaling	PMID: 23690594
ClusterMicroglia	ClusterNeuroblast	PSAP	GPR37	0.0364908	0	PSAP_GPR37	PSAP - GPR37	PSAP	Secreted Signaling	PMID: 23690594
ClusterNeural Stem	ClusterNeuroblast	PSAP	GPR37	0.0218767	0	PSAP_GPR37	PSAP - GPR37	PSAP	Secreted Signaling	PMID: 23690594
ClusterNeuroblast	ClusterNeuroblast	PSAP	GPR37	0.0421907	0	PSAP_GPR37	PSAP - GPR37	PSAP	Secreted Signaling	PMID: 23690594
ClusterOPCs	ClusterNeuroblast	PSAP	GPR37	0.022475	0	PSAP_GPR37	PSAP - GPR37	PSAP	Secreted Signaling	PMID: 23690594
ClustermGC	ClusterNeuroblast	PSAP	GPR37	0.0251362	0	PSAP_GPR37	PSAP - GPR37	PSAP	Secreted Signaling	PMID: 23690594
ClustermOli	ClusterNeuroblast	PSAP	GPR37	0.0135927	0	PSAP_GPR37	PSAP - GPR37	PSAP	Secreted Signaling	PMID: 23690594
ClusterAstrocytes	ClustermOli	PSAP	GPR37	0.0401801	0	PSAP_GPR37	PSAP - GPR37	PSAP	Secreted Signaling	PMID: 23690594
ClusterCA2-4_neurons	ClustermOli	PSAP	GPR37	0.0256607	0	PSAP_GPR37	PSAP - GPR37	PSAP	Secreted Signaling	PMID: 23690594
ClusterCA_neurons	ClustermOli	PSAP	GPR37	0.0225108	0	PSAP_GPR37	PSAP - GPR37	PSAP	Secreted Signaling	PMID: 23690594
ClusterEndothelial	ClustermOli	PSAP	GPR37	0.0401236	0	PSAP_GPR37	PSAP - GPR37	PSAP	Secreted Signaling	PMID: 23690594
ClusterEpendymal	ClustermOli	PSAP	GPR37	0.061252	0	PSAP_GPR37	PSAP - GPR37	PSAP	Secreted Signaling	PMID: 23690594
ClusterGABA_neurons	ClustermOli	PSAP	GPR37	0.0271556	0	PSAP_GPR37	PSAP - GPR37	PSAP	Secreted Signaling	PMID: 23690594
ClusterImmature	ClustermOli	PSAP	GPR37	0.0460821	0	PSAP_GPR37	PSAP - GPR37	PSAP	Secreted Signaling	PMID: 23690594
ClusterMicroglia	ClustermOli	PSAP	GPR37	0.0455583	0	PSAP_GPR37	PSAP - GPR37	PSAP	Secreted Signaling	PMID: 23690594
ClusterNeural Stem	ClustermOli	PSAP	GPR37	0.0274161	0	PSAP_GPR37	PSAP - GPR37	PSAP	Secreted Signaling	PMID: 23690594
ClusterNeuroblast	ClustermOli	PSAP	GPR37	0.0525973	0	PSAP_GPR37	PSAP - GPR37	PSAP	Secreted Signaling	PMID: 23690594
ClusterOPCs	ClustermOli	PSAP	GPR37	0.0281616	0	PSAP_GPR37	PSAP - GPR37	PSAP	Secreted Signaling	PMID: 23690594
ClustermGC	ClustermOli	PSAP	GPR37	0.0314744	0	PSAP_GPR37	PSAP - GPR37	PSAP	Secreted Signaling	PMID: 23690594
ClustermOli	ClustermOli	PSAP	GPR37	0.0170712	0	PSAP_GPR37	PSAP - GPR37	PSAP	Secreted Signaling	PMID: 23690594
ClusterEndothelial	ClusterEndothelial	COL1A2	ITGA1_ITGB1	0.00704583	0	COL1A2_ITGA1_ITGB1	COL1A2 - (ITGA1+ITGB1)	COLLAGEN	ECM-Receptor	KEGG: hsa04512
ClusterCA2-4_neurons	ClusterEndothelial	COL4A1	ITGA1_ITGB1	0.0100755	0	COL4A1_ITGA1_ITGB1	COL4A1 - (ITGA1+ITGB1)	COLLAGEN	ECM-Receptor	KEGG: hsa04512
ClusterCA_neurons	ClusterEndothelial	COL4A1	ITGA1_ITGB1	0.0101374	0	COL4A1_ITGA1_ITGB1	COL4A1 - (ITGA1+ITGB1)	COLLAGEN	ECM-Receptor	KEGG: hsa04512
[truncated: 5,772 more rows]

## Sheet: cluster_interactions
Unnamed: 0	ClusterAstrocytes	ClusterCA2-4_neurons	ClusterCA_neurons	ClusterEndothelial	ClusterEpendymal	ClusterGABA_neurons	ClusterImmature	ClusterMicroglia	ClusterNeural Stem	ClusterNeuroblast	ClusterOPCs	ClustermGC	ClustermOli
ClusterAstrocytes	1.33809	1.26759	1.18546	0.476565	1.21638	1.52096	1.65816	0.151541	1.41002	1.11267	2.33084	1.6263	1.49009
ClusterCA2-4_neurons	1.10226	1.64548	1.45349	0.298661	1.3152	1.94108	1.59338	0.210033	1.12225	1.23139	2.30895	1.54496	1.4533
ClusterCA_neurons	1.33008	1.83922	1.62764	0.329768	1.15492	2.12803	1.77991	0.193119	1.34788	1.27831	2.71678	1.97457	1.65288
ClusterEndothelial	0.741734	0.642777	0.445511	1.02187	0.850635	0.41139	0.718624	0.271261	0.92912	0.305009	0.641983	0.712416	0.316145
ClusterEpendymal	1.24808	0.999835	0.779428	0.700083	1.01158	1.09736	1.00829	0.236151	1.3703	0.54229	1.42521	0.98811	0.639164
ClusterGABA_neurons	1.23776	1.80787	1.61654	0.321687	1.31493	2.17217	1.75658	0.213248	1.2402	1.2464	2.71046	1.93316	1.61293
ClusterImmature	1.52688	1.99573	1.70484	0.511662	1.35529	2.19476	1.96179	0.233289	1.58344	1.35009	2.65899	2.14568	1.72761
ClusterMicroglia	0.188785	0.180552	0.0935363	0.235916	0.215614	0.0966497	0.19586	0.14123	0.255514	0.116963	0.179615	0.217709	0.136109
ClusterNeural Stem	1.34476	1.03861	0.98323	0.466998	1.22502	1.39757	1.46727	0.155754	1.43145	1.08665	2.27361	1.43532	1.46566
ClusterNeuroblast	0.937925	0.837976	0.630607	0.445286	0.471172	0.543197	1.10976	0.278701	1.05519	0.746926	1.32058	1.28428	1.22506
ClusterOPCs	1.69537	1.33312	1.48492	0.39116	1.31001	1.85104	1.89834	0.246076	1.76554	1.28308	2.80986	2.01561	1.40196
ClustermGC	1.53413	1.953	1.67164	0.509083	1.34972	2.15167	2.16352	0.22479	1.59547	1.52521	2.84462	2.0895	1.94974
ClustermOli	1.12227	1.38769	1.24521	0.555379	0.620952	0.90862	1.62824	0.294466	1.25944	1.23678	1.53637	1.6213	1.42712
