# Supplementary material for: A roadmap to human hippocampal neurogenesis in adulthood, aging and AD.
Source: Research Square preprint supplement (doi:10.21203/rs.3.rs-4469965/v1), 2024-05-30
Supplement: Supplementary file 2 [file 21a0a72fc4273f356e749a90.xlsx]

## Sheet: signif_summary
Contrast	Cluster	Total	Up	Down
Diagnosis	GABA_neurons	143	0	0
1.YC/0.HA	GABA_neurons	153	115	38
2.MCI/0.HA	GABA_neurons	10	4	6
3.AD/0.HA	GABA_neurons	2329	883	1446
2.MCI/1.YC	GABA_neurons	417	112	305
3.AD/1.YC	GABA_neurons	3251	1171	2080
3.AD/2.MCI	GABA_neurons	9	7	2
CODE	Acronym in manuscript
HA	NCI
YC	YA
MCI	MCI
AD	AD

## Sheet: signif
ID	Symbol	log2FC	log2CPM	PValue	QValue	Contrast	Cluster
ENSG00000241563	CORT			0.00144501	0.239607	Diagnosis	GABA_neurons
ENSG00000171729	TMEM51			0.000163094	0.137284	Diagnosis	GABA_neurons
ENSG00000228436	AL139260.1			0.0011802	0.230361	Diagnosis	GABA_neurons
ENSG00000117155	SSX2IP			0.00013936	0.137284	Diagnosis	GABA_neurons
ENSG00000241073	AC093019.2			0.00039762	0.155162	Diagnosis	GABA_neurons
ENSG00000236230	AL356108.1			8.75165e-05	0.128968	Diagnosis	GABA_neurons
ENSG00000171094	ALK			0.00166544	0.243884	Diagnosis	GABA_neurons
ENSG00000285519	AC104781.2			0.000434454	0.160053	Diagnosis	GABA_neurons
ENSG00000119866	BCL11A			0.000784191	0.21472	Diagnosis	GABA_neurons
ENSG00000014641	MDH1			0.00118481	0.230361	Diagnosis	GABA_neurons
ENSG00000185304	RGPD2			0.00146378	0.239607	Diagnosis	GABA_neurons
ENSG00000176771	NCKAP5			0.000379429	0.155162	Diagnosis	GABA_neurons
ENSG00000115183	TANC1			0.000880763	0.220321	Diagnosis	GABA_neurons
ENSG00000285906	AC083855.2			0.000294199	0.155162	Diagnosis	GABA_neurons
ENSG00000151789	ZNF385D			0.000369019	0.155162	Diagnosis	GABA_neurons
ENSG00000114541	FRMD4B			7.97064e-05	0.128968	Diagnosis	GABA_neurons
ENSG00000168386	FILIP1L			0.000200656	0.137284	Diagnosis	GABA_neurons
ENSG00000170017	ALCAM			0.00018746	0.137284	Diagnosis	GABA_neurons
ENSG00000287022	AC079841.2			0.00013787	0.137284	Diagnosis	GABA_neurons
ENSG00000206199	ANKUB1			0.000397886	0.155162	Diagnosis	GABA_neurons
ENSG00000159788	RGS12			0.00142751	0.239607	Diagnosis	GABA_neurons
ENSG00000286900	AL590235.2			0.000346437	0.155162	Diagnosis	GABA_neurons
ENSG00000168824	NSG1			0.000280895	0.155162	Diagnosis	GABA_neurons
ENSG00000248343	AC096576.2			0.000955263	0.222318	Diagnosis	GABA_neurons
ENSG00000138764	CCNG2			0.00157177	0.243884	Diagnosis	GABA_neurons
ENSG00000249307	LINC01088			0.00158301	0.243884	Diagnosis	GABA_neurons
ENSG00000250062	AC104827.1			0.00079977	0.216066	Diagnosis	GABA_neurons
ENSG00000163110	PDLIM5			0.000135902	0.137284	Diagnosis	GABA_neurons
ENSG00000248152	AC093879.1			0.0015177	0.243884	Diagnosis	GABA_neurons
ENSG00000138735	PDE5A			0.00145972	0.239607	Diagnosis	GABA_neurons
ENSG00000261083	LINC02516			0.000729807	0.21061	Diagnosis	GABA_neurons
ENSG00000196782	MAML3			0.000203263	0.137284	Diagnosis	GABA_neurons
ENSG00000249806	AC139720.1			0.000935774	0.222318	Diagnosis	GABA_neurons
ENSG00000250910	AC097467.3			5.29497e-05	0.128968	Diagnosis	GABA_neurons
ENSG00000113389	NPR3			0.0010594	0.222318	Diagnosis	GABA_neurons
ENSG00000175426	PCSK1			0.000666754	0.204694	Diagnosis	GABA_neurons
ENSG00000248752	AC116362.1			0.00160531	0.243884	Diagnosis	GABA_neurons
ENSG00000230612	AC004039.1			0.00103781	0.222318	Diagnosis	GABA_neurons
ENSG00000145832	SLC25A48			0.000422056	0.158365	Diagnosis	GABA_neurons
ENSG00000120738	EGR1			0.000875834	0.220321	Diagnosis	GABA_neurons
ENSG00000251205	AC016598.2			8.90483e-05	0.128968	Diagnosis	GABA_neurons
ENSG00000249881	AC008696.2			0.000119539	0.137284	Diagnosis	GABA_neurons
ENSG00000285605	AC109441.1			0.00132762	0.239607	Diagnosis	GABA_neurons
ENSG00000169247	SH3TC2			0.000652971	0.203546	Diagnosis	GABA_neurons
ENSG00000182578	CSF1R			0.00169416	0.243884	Diagnosis	GABA_neurons
ENSG00000170624	SGCD			0.000245017	0.155162	Diagnosis	GABA_neurons
ENSG00000254187	AC008708.2			0.00164367	0.243884	Diagnosis	GABA_neurons
ENSG00000182132	KCNIP1			0.00104976	0.222318	Diagnosis	GABA_neurons
ENSG00000286364	AL512308.1			0.00151988	0.243884	Diagnosis	GABA_neurons
ENSG00000137266	SLC22A23			0.00076484	0.214038	Diagnosis	GABA_neurons
ENSG00000272168	CASC15			0.00120059	0.230361	Diagnosis	GABA_neurons
ENSG00000204296	TSBP1			0.00116218	0.230361	Diagnosis	GABA_neurons
ENSG00000287679	AL355347.1			0.00161867	0.243884	Diagnosis	GABA_neurons
ENSG00000287811	AL391840.3			0.000326231	0.155162	Diagnosis	GABA_neurons
ENSG00000146242	TPBG			0.00054325	0.181111	Diagnosis	GABA_neurons
ENSG00000118412	CASP8AP2			0.00173996	0.246539	Diagnosis	GABA_neurons
ENSG00000173214	MFSD4B			0.0010643	0.222318	Diagnosis	GABA_neurons
ENSG00000047936	ROS1			0.00103182	0.222318	Diagnosis	GABA_neurons
ENSG00000106546	AHR			0.00162963	0.243884	Diagnosis	GABA_neurons
ENSG00000287249	AC005400.1			0.000482649	0.165897	Diagnosis	GABA_neurons
ENSG00000006704	GTF2IRD1			0.000398205	0.155162	Diagnosis	GABA_neurons
ENSG00000128564	VGF			0.00125464	0.235385	Diagnosis	GABA_neurons
ENSG00000240499	AC004594.1			0.00086757	0.220321	Diagnosis	GABA_neurons
ENSG00000285106	AC016831.7			0.00139382	0.239607	Diagnosis	GABA_neurons
ENSG00000253197	AC117834.1			5.86661e-05	0.128968	Diagnosis	GABA_neurons
ENSG00000164930	FZD6			0.000996605	0.222318	Diagnosis	GABA_neurons
ENSG00000107099	DOCK8			5.49869e-05	0.128968	Diagnosis	GABA_neurons
ENSG00000107104	KANK1			0.00104434	0.222318	Diagnosis	GABA_neurons
ENSG00000234021	AL596451.1			0.000349231	0.155162	Diagnosis	GABA_neurons
ENSG00000187713	TMEM203			0.00119489	0.230361	Diagnosis	GABA_neurons
ENSG00000229240	LINC00710			0.000395076	0.155162	Diagnosis	GABA_neurons
ENSG00000237986	CELF2-AS2			0.000126383	0.137284	Diagnosis	GABA_neurons
ENSG00000148488	ST8SIA6			0.00156321	0.243884	Diagnosis	GABA_neurons
ENSG00000077327	SPAG6			0.00135247	0.239607	Diagnosis	GABA_neurons
ENSG00000231131	LNCAROD			0.00169138	0.243884	Diagnosis	GABA_neurons
ENSG00000228065	LINC01515			0.000194808	0.137284	Diagnosis	GABA_neurons
ENSG00000099282	TSPAN15			0.00101455	0.222318	Diagnosis	GABA_neurons
ENSG00000234942	GRID1-AS1			0.000737997	0.21061	Diagnosis	GABA_neurons
ENSG00000138119	MYOF			0.000990067	0.222318	Diagnosis	GABA_neurons
ENSG00000273143	AL355512.1			0.000350765	0.155162	Diagnosis	GABA_neurons
ENSG00000198873	GRK5			0.000347971	0.155162	Diagnosis	GABA_neurons
ENSG00000132334	PTPRE			8.91105e-05	0.128968	Diagnosis	GABA_neurons
ENSG00000108001	EBF3			0.00129091	0.237785	Diagnosis	GABA_neurons
ENSG00000285751	AC021723.2			0.00136985	0.239607	Diagnosis	GABA_neurons
ENSG00000283217	AC068205.1			0.000100097	0.135211	Diagnosis	GABA_neurons
ENSG00000186907	RTN4RL2			0.000415546	0.158365	Diagnosis	GABA_neurons
ENSG00000166793	YPEL4			0.000483067	0.165897	Diagnosis	GABA_neurons
ENSG00000166927	MS4A7			0.000451112	0.160358	Diagnosis	GABA_neurons
ENSG00000196600	SLC22A25			0.000771138	0.214038	Diagnosis	GABA_neurons
ENSG00000287912	AP003464.1			5.87442e-05	0.128968	Diagnosis	GABA_neurons
ENSG00000255028	AP003049.2			6.42374e-05	0.128968	Diagnosis	GABA_neurons
ENSG00000185742	C11orf87			0.000693581	0.206667	Diagnosis	GABA_neurons
ENSG00000255580	AP000462.1			0.000340486	0.155162	Diagnosis	GABA_neurons
ENSG00000165478	HEPACAM			0.000930034	0.222318	Diagnosis	GABA_neurons
ENSG00000250166	AC053513.1			0.000391403	0.155162	Diagnosis	GABA_neurons
ENSG00000123104	ITPR2			1.11773e-05	0.113237	Diagnosis	GABA_neurons
ENSG00000257228	AC090531.1			0.000678906	0.205313	Diagnosis	GABA_neurons
ENSG00000161835	GRASP			0.000345617	0.155162	Diagnosis	GABA_neurons
ENSG00000135678	CPM			0.000555583	0.181568	Diagnosis	GABA_neurons
ENSG00000257458	AC069437.1			0.00144872	0.239607	Diagnosis	GABA_neurons
ENSG00000012504	NR1H4			6.69141e-05	0.128968	Diagnosis	GABA_neurons
ENSG00000257095	AC084361.1			0.00120102	0.230361	Diagnosis	GABA_neurons
ENSG00000157782	CABP1			0.000710497	0.208639	Diagnosis	GABA_neurons
ENSG00000132972	RNF17			0.000300186	0.155162	Diagnosis	GABA_neurons
ENSG00000150893	FREM2			0.000350082	0.155162	Diagnosis	GABA_neurons
ENSG00000102468	HTR2A			0.000621919	0.196896	Diagnosis	GABA_neurons
ENSG00000139734	DIAPH3			0.00145826	0.239607	Diagnosis	GABA_neurons
ENSG00000228842	PCDH9-AS2			2.73722e-06	0.0554615	Diagnosis	GABA_neurons
ENSG00000285588	AL160254.1			0.000829756	0.218344	Diagnosis	GABA_neurons
ENSG00000198542	ITGBL1			0.00102219	0.222318	Diagnosis	GABA_neurons
ENSG00000259001	AL355075.4			0.000920557	0.222318	Diagnosis	GABA_neurons
ENSG00000092051	JPH4			0.00115493	0.230361	Diagnosis	GABA_neurons
ENSG00000258580	AL136298.1			0.000172767	0.137284	Diagnosis	GABA_neurons
ENSG00000151322	NPAS3			0.00090106	0.222318	Diagnosis	GABA_neurons
ENSG00000182732	RGS6			0.00164196	0.243884	Diagnosis	GABA_neurons
ENSG00000258859	LINC02296			0.000604347	0.19437	Diagnosis	GABA_neurons
ENSG00000151575	TEX9			0.00128407	0.237785	Diagnosis	GABA_neurons
ENSG00000259564	AC009554.1			0.00145297	0.239607	Diagnosis	GABA_neurons
ENSG00000137809	ITGA11			0.00087068	0.220321	Diagnosis	GABA_neurons
ENSG00000004779	NDUFAB1			0.00146636	0.239607	Diagnosis	GABA_neurons
ENSG00000102924	CBLN1			0.00135495	0.239607	Diagnosis	GABA_neurons
ENSG00000197943	PLCG2			0.000304539	0.155162	Diagnosis	GABA_neurons
ENSG00000167693	NXN			0.000337706	0.155162	Diagnosis	GABA_neurons
ENSG00000141255	SPATA22			0.000249974	0.155162	Diagnosis	GABA_neurons
ENSG00000181045	SLC26A11			0.00172849	0.246539	Diagnosis	GABA_neurons
ENSG00000263878	DLGAP1-AS4			0.000172772	0.137284	Diagnosis	GABA_neurons
ENSG00000265204	AC090772.2			0.00123799	0.234432	Diagnosis	GABA_neurons
ENSG00000285095	AC025887.2			0.000148325	0.137284	Diagnosis	GABA_neurons
ENSG00000166960	CCDC178			0.000444751	0.160358	Diagnosis	GABA_neurons
ENSG00000267707	AC015961.2			0.00169715	0.243884	Diagnosis	GABA_neurons
ENSG00000178342	KCNG2			0.00165761	0.243884	Diagnosis	GABA_neurons
ENSG00000176533	GNG7			0.00156932	0.243884	Diagnosis	GABA_neurons
ENSG00000105738	SIPA1L3			0.00120513	0.230361	Diagnosis	GABA_neurons
ENSG00000176396	EID2			0.000545245	0.181111	Diagnosis	GABA_neurons
ENSG00000233993	AL121900.1			0.00102438	0.222318	Diagnosis	GABA_neurons
ENSG00000232712	KIZ-AS1			0.00111426	0.230361	Diagnosis	GABA_neurons
ENSG00000053438	NNAT			0.000822014	0.218344	Diagnosis	GABA_neurons
ENSG00000278996	FP671120.4			6.76121e-05	0.128968	Diagnosis	GABA_neurons
ENSG00000229425	AJ009632.2			0.000150288	0.137284	Diagnosis	GABA_neurons
ENSG00000154723	ATP5PF			0.00169556	0.243884	Diagnosis	GABA_neurons
ENSG00000206028	Z99774.1			0.000195111	0.137284	Diagnosis	GABA_neurons
ENSG00000100362	PVALB			6.96488e-05	0.128968	Diagnosis	GABA_neurons
ENSG00000188158	NHS			0.00134901	0.239607	Diagnosis	GABA_neurons
ENSG00000117154	IGSF21	1.45791	5.35215	0.00143686	0.22745	1.YC/0.HA	GABA_neurons
ENSG00000187147	RNF220	1.13107	6.12932	0.000934439	0.18032	1.YC/0.HA	GABA_neurons
ENSG00000186160	CYP4Z1	-1.10254	3.27983	0.00101565	0.190547	1.YC/0.HA	GABA_neurons
ENSG00000174348	PODN	-1.41195	1.96342	0.00138157	0.221079	1.YC/0.HA	GABA_neurons
ENSG00000117155	SSX2IP	0.959526	6.16057	0.000823376	0.168518	1.YC/0.HA	GABA_neurons
ENSG00000197915	HRNR	-2.20353	0.667628	0.000809404	0.167348	1.YC/0.HA	GABA_neurons
ENSG00000285638	AL138927.1	3.72449	1.41373	9.16486e-05	0.0619697	1.YC/0.HA	GABA_neurons
ENSG00000143858	SYT2	2.00898	2.65571	0.000136734	0.076785	1.YC/0.HA	GABA_neurons
ENSG00000008118	CAMK1G	1.03031	4.18131	0.000375737	0.116136	1.YC/0.HA	GABA_neurons
ENSG00000169621	APLF	1.63306	3.29677	1.09787e-05	0.0222451	1.YC/0.HA	GABA_neurons
ENSG00000080293	SCTR	2.19297	1.43866	3.74585e-05	0.0510932	1.YC/0.HA	GABA_neurons
ENSG00000144230	GPR17	2.49022	0.793277	0.000651433	0.150475	1.YC/0.HA	GABA_neurons
ENSG00000231079	AC105402.3	2.49995	4.42831	0.000151584	0.076785	1.YC/0.HA	GABA_neurons
ENSG00000115183	TANC1	1.02886	5.0643	9.86466e-05	0.0644767	1.YC/0.HA	GABA_neurons
ENSG00000136546	SCN7A	-1.63947	6.38154	0.00178749	0.247442	1.YC/0.HA	GABA_neurons
ENSG00000162944	RFTN2	1.08432	3.9852	0.000889461	0.177627	1.YC/0.HA	GABA_neurons
ENSG00000115896	PLCL1	1.44282	7.52811	7.01275e-05	0.0592052	1.YC/0.HA	GABA_neurons
ENSG00000135917	SLC19A3	-1.42244	1.90748	0.00128663	0.213686	1.YC/0.HA	GABA_neurons
ENSG00000286363	AC087427.1	2.92051	-0.187483	0.00109484	0.198069	1.YC/0.HA	GABA_neurons
ENSG00000183960	KCNH8	0.894912	5.5341	0.000266421	0.105355	1.YC/0.HA	GABA_neurons
ENSG00000168314	MOBP	1.85289	5.48501	0.000272215	0.105355	1.YC/0.HA	GABA_neurons
ENSG00000242242	NECTIN3-AS1	0.952136	4.14772	0.00181712	0.247442	1.YC/0.HA	GABA_neurons
ENSG00000163430	FSTL1	1.04819	3.7239	0.00160478	0.235623	1.YC/0.HA	GABA_neurons
ENSG00000154928	EPHB1	0.841196	6.26447	0.000626989	0.150475	1.YC/0.HA	GABA_neurons
ENSG00000181744	DIPK2A	1.39752	5.24021	4.41661e-05	0.0510932	1.YC/0.HA	GABA_neurons
ENSG00000174899	SLC66A1L	-1.68756	1.51465	0.000406852	0.116136	1.YC/0.HA	GABA_neurons
ENSG00000288087	AC112770.1	4.4215	4.11078	0.000462488	0.126634	1.YC/0.HA	GABA_neurons
ENSG00000075651	PLD1	0.883138	4.73409	0.00110627	0.198364	1.YC/0.HA	GABA_neurons
ENSG00000244405	ETV5	1.6025	5.0387	0.00168747	0.243135	1.YC/0.HA	GABA_neurons
ENSG00000047365	ARAP2	1.16377	6.70086	0.000260033	0.105355	1.YC/0.HA	GABA_neurons
ENSG00000154274	C4orf19	1.22173	2.22864	0.00181961	0.247442	1.YC/0.HA	GABA_neurons
ENSG00000174607	UGT8	1.43319	4.5114	0.00020596	0.0948448	1.YC/0.HA	GABA_neurons
ENSG00000261083	LINC02516	-2.59606	2.66275	8.53476e-05	0.0619697	1.YC/0.HA	GABA_neurons
ENSG00000287144	AC097511.1	2.8587	-0.256195	0.00150498	0.231014	1.YC/0.HA	GABA_neurons
ENSG00000071205	ARHGAP10	1.80004	4.82683	0.000795912	0.166255	1.YC/0.HA	GABA_neurons
ENSG00000198948	MFAP3L	1.02451	4.79314	0.000402966	0.116136	1.YC/0.HA	GABA_neurons
ENSG00000272870	AC097534.2	-1.02134	3.62188	0.00122814	0.212688	1.YC/0.HA	GABA_neurons
ENSG00000164236	ANKRD33B	1.7681	4.89114	0.00137885	0.221079	1.YC/0.HA	GABA_neurons
ENSG00000287709	AC008780.2	2.40255	0.603184	0.000358941	0.116136	1.YC/0.HA	GABA_neurons
ENSG00000178722	C5orf64	1.70373	3.63931	1.15926e-07	0.000391481	1.YC/0.HA	GABA_neurons
ENSG00000249057	MAST4-IT1	3.29081	0.53275	0.000306882	0.110508	1.YC/0.HA	GABA_neurons
ENSG00000171617	ENC1	1.1368	5.49527	0.0013857	0.221079	1.YC/0.HA	GABA_neurons
ENSG00000112893	MAN2A1	1.10099	7.79743	0.00037537	0.116136	1.YC/0.HA	GABA_neurons
ENSG00000249150	AC010267.1	-1.63646	2.00659	0.00159686	0.235623	1.YC/0.HA	GABA_neurons
ENSG00000249803	AC112178.1	-3.65016	-0.24597	0.000551176	0.145038	1.YC/0.HA	GABA_neurons
ENSG00000120738	EGR1	2.34138	1.96891	0.000563132	0.145861	1.YC/0.HA	GABA_neurons
ENSG00000251205	AC016598.2	4.58877	1.5979	0.000316328	0.110508	1.YC/0.HA	GABA_neurons
ENSG00000249881	AC008696.2	3.24342	2.77141	0.000250883	0.105355	1.YC/0.HA	GABA_neurons
ENSG00000169247	SH3TC2	1.871	2.84715	0.000312126	0.110508	1.YC/0.HA	GABA_neurons
ENSG00000182578	CSF1R	1.487	1.63435	0.00137336	0.221079	1.YC/0.HA	GABA_neurons
ENSG00000118322	ATP10B	1.24336	4.33071	0.00188224	0.249267	1.YC/0.HA	GABA_neurons
ENSG00000177932	ZNF354C	1.94076	2.01691	5.54758e-05	0.0510932	1.YC/0.HA	GABA_neurons
ENSG00000286364	AL512308.1	2.10784	1.39859	7.94738e-05	0.0619346	1.YC/0.HA	GABA_neurons
ENSG00000172197	MBOAT1	3.13398	-0.104733	0.000691988	0.155699	1.YC/0.HA	GABA_neurons
ENSG00000186470	BTN3A2	-1.7379	1.76749	0.0012621	0.213686	1.YC/0.HA	GABA_neurons
ENSG00000231389	HLA-DPA1	-1.69061	1.40382	0.000284612	0.105355	1.YC/0.HA	GABA_neurons
ENSG00000112561	TFEB	1.53037	2.95036	0.00188196	0.249267	1.YC/0.HA	GABA_neurons
ENSG00000188107	EYS	0.974341	5.75002	0.000143117	0.076785	1.YC/0.HA	GABA_neurons
ENSG00000112280	COL9A1	1.32624	2.65242	0.00127621	0.213686	1.YC/0.HA	GABA_neurons
ENSG00000286871	AL139090.1	-2.18709	2.54582	2.2828e-05	0.0355801	1.YC/0.HA	GABA_neurons
ENSG00000146469	VIP	1.14443	5.75053	0.000841979	0.170602	1.YC/0.HA	GABA_neurons
ENSG00000153721	CNKSR3	1.33069	3.15238	0.000345311	0.116136	1.YC/0.HA	GABA_neurons
ENSG00000125337	KIF25	1.86544	1.10158	0.00130202	0.214484	1.YC/0.HA	GABA_neurons
ENSG00000230423	AL672310.1	-1.71983	0.829092	0.000900974	0.177627	1.YC/0.HA	GABA_neurons
ENSG00000106624	AEBP1	-2.2677	0.888832	0.000546875	0.145038	1.YC/0.HA	GABA_neurons
ENSG00000285741	AC005999.2	-1.71204	5.94768	0.00105778	0.1933	1.YC/0.HA	GABA_neurons
ENSG00000128564	VGF	2.51597	3.49891	1.44592e-08	0.000146486	1.YC/0.HA	GABA_neurons
ENSG00000106278	PTPRZ1	0.966243	6.66322	0.000135851	0.076785	1.YC/0.HA	GABA_neurons
ENSG00000240499	AC004594.1	1.32854	3.70455	0.00185564	0.249	1.YC/0.HA	GABA_neurons
ENSG00000241345	AC004690.2	2.10255	1.59792	0.0010091	0.190547	1.YC/0.HA	GABA_neurons
ENSG00000224897	POT1-AS1	-1.11035	7.24492	0.000714639	0.155699	1.YC/0.HA	GABA_neurons
ENSG00000105894	PTN	0.857192	5.27775	0.000389539	0.116136	1.YC/0.HA	GABA_neurons
ENSG00000253642	AF279873.3	-1.18077	5.30829	0.000273175	0.105355	1.YC/0.HA	GABA_neurons
ENSG00000254302	AC087855.2	-2.10616	1.43522	0.000108636	0.0667027	1.YC/0.HA	GABA_neurons
ENSG00000253108	AC090993.1	-2.99416	4.0741	0.00152706	0.232633	1.YC/0.HA	GABA_neurons
ENSG00000147488	ST18	1.23447	6.70664	9.03207e-05	0.0619697	1.YC/0.HA	GABA_neurons
ENSG00000253877	LINC01608	0.949253	4.88414	0.00097865	0.18707	1.YC/0.HA	GABA_neurons
ENSG00000287759	AL353151.2	1.19278	3.48119	0.00155161	0.232633	1.YC/0.HA	GABA_neurons
ENSG00000119138	KLF9	1.51439	3.90092	0.000700917	0.155699	1.YC/0.HA	GABA_neurons
ENSG00000107362	ABHD17B	0.729554	5.0765	0.00122632	0.212688	1.YC/0.HA	GABA_neurons
ENSG00000265763	ZNF488	2.13334	1.07022	0.000550156	0.145038	1.YC/0.HA	GABA_neurons
ENSG00000072422	RHOBTB1	1.21829	4.83112	0.000376752	0.116136	1.YC/0.HA	GABA_neurons
ENSG00000138311	ZNF365	1.18491	5.00352	6.81091e-05	0.0592052	1.YC/0.HA	GABA_neurons
ENSG00000156042	CFAP70	-1.05833	5.51903	0.000400112	0.116136	1.YC/0.HA	GABA_neurons
ENSG00000165424	ZCCHC24	1.26463	3.41924	0.000602113	0.148781	1.YC/0.HA	GABA_neurons
ENSG00000272447	AL135925.1	-1.203	2.48376	0.00154789	0.232633	1.YC/0.HA	GABA_neurons
ENSG00000197430	OPALIN	1.85164	3.58039	0.00105894	0.1933	1.YC/0.HA	GABA_neurons
ENSG00000148737	TCF7L2	0.942719	5.001	0.000581362	0.145861	1.YC/0.HA	GABA_neurons
ENSG00000229272	AL157388.1	-0.936005	4.23243	0.00102542	0.190614	1.YC/0.HA	GABA_neurons
ENSG00000285751	AC021723.2	3.58505	1.51521	3.30442e-08	0.000223181	1.YC/0.HA	GABA_neurons
ENSG00000283217	AC068205.1	2.60931	1.56276	1.51959e-07	0.000439857	1.YC/0.HA	GABA_neurons
ENSG00000133316	WDR74	1.45871	3.19984	5.45504e-05	0.0510932	1.YC/0.HA	GABA_neurons
ENSG00000109971	HSPA8	1.03041	5.98949	0.000759569	0.163727	1.YC/0.HA	GABA_neurons
ENSG00000134917	ADAMTS8	1.74797	2.18327	0.0015001	0.231014	1.YC/0.HA	GABA_neurons
ENSG00000205810	KLRC3	1.93099	0.859176	0.000427061	0.118536	1.YC/0.HA	GABA_neurons
ENSG00000255968	AC024145.1	1.50017	2.40729	0.000641938	0.150475	1.YC/0.HA	GABA_neurons
ENSG00000123104	ITPR2	1.40922	6.65052	1.83495e-07	0.000464747	1.YC/0.HA	GABA_neurons
ENSG00000050438	SLC4A8	0.856085	6.37277	0.000396317	0.116136	1.YC/0.HA	GABA_neurons
ENSG00000123358	NR4A1	2.08193	2.48719	0.000407027	0.116136	1.YC/0.HA	GABA_neurons
ENSG00000166863	TAC3	1.91938	4.51806	2.04747e-06	0.00460954	1.YC/0.HA	GABA_neurons
ENSG00000286279	AC108721.2	1.6501	2.81393	0.000660957	0.150475	1.YC/0.HA	GABA_neurons
ENSG00000157782	CABP1	1.39319	6.27123	0.000793906	0.166255	1.YC/0.HA	GABA_neurons
ENSG00000132972	RNF17	3.21384	1.73986	9.59427e-08	0.000391481	1.YC/0.HA	GABA_neurons
ENSG00000133119	RFC3	-1.13306	5.41315	0.000160561	0.0789241	1.YC/0.HA	GABA_neurons
ENSG00000125247	TMTC4	1.10588	4.29917	4.59526e-05	0.0510932	1.YC/0.HA	GABA_neurons
ENSG00000258081	AL110292.1	1.57133	1.97136	0.00126658	0.213686	1.YC/0.HA	GABA_neurons
ENSG00000259070	LINC00639	2.08368	4.44239	1.36061e-08	0.000146486	1.YC/0.HA	GABA_neurons
ENSG00000182732	RGS6	1.02965	8.37369	0.0007952	0.166255	1.YC/0.HA	GABA_neurons
ENSG00000258859	LINC02296	3.63601	3.77409	0.000147349	0.076785	1.YC/0.HA	GABA_neurons
ENSG00000156414	TDRD9	-1.47173	2.33504	0.000245235	0.105355	1.YC/0.HA	GABA_neurons
ENSG00000260232	PWRN4	-1.25842	7.08336	0.000611294	0.149229	1.YC/0.HA	GABA_neurons
ENSG00000261064	LINC02256	-0.994374	4.22701	0.00148293	0.231014	1.YC/0.HA	GABA_neurons
ENSG00000134138	MEIS2	1.07962	4.88382	0.00170394	0.243135	1.YC/0.HA	GABA_neurons
ENSG00000285934	AC091074.2	-2.55242	0.164056	0.00179964	0.247442	1.YC/0.HA	GABA_neurons
ENSG00000256061	DNAAF4	-0.898625	4.9132	0.00183636	0.248055	1.YC/0.HA	GABA_neurons
ENSG00000138587	MNS1	-1.29702	3.95319	0.00180309	0.247442	1.YC/0.HA	GABA_neurons
ENSG00000157483	MYO1E	1.2186	3.98357	0.00066003	0.150475	1.YC/0.HA	GABA_neurons
ENSG00000137809	ITGA11	2.50927	1.63809	0.000283628	0.105355	1.YC/0.HA	GABA_neurons
ENSG00000259543	AC060809.1	-1.02212	2.80797	0.00180232	0.247442	1.YC/0.HA	GABA_neurons
ENSG00000287950	AC009432.2	3.61609	0.425039	0.00170309	0.243135	1.YC/0.HA	GABA_neurons
ENSG00000140470	ADAMTS17	1.82826	6.47159	0.000197884	0.0932449	1.YC/0.HA	GABA_neurons
ENSG00000103184	SEC14L5	1.60744	4.6106	5.12741e-05	0.0510932	1.YC/0.HA	GABA_neurons
ENSG00000183793	NPIPA5	-1.74425	2.21903	0.00156145	0.232633	1.YC/0.HA	GABA_neurons
ENSG00000102924	CBLN1	2.17098	1.26695	4.61014e-05	0.0510932	1.YC/0.HA	GABA_neurons
ENSG00000140807	NKD1	1.58557	1.93312	0.000285979	0.105355	1.YC/0.HA	GABA_neurons
ENSG00000103089	FA2H	1.34139	3.27184	0.000104621	0.0662446	1.YC/0.HA	GABA_neurons
ENSG00000260528	FAM157C	2.36451	1.92635	1.04411e-07	0.000391481	1.YC/0.HA	GABA_neurons
ENSG00000108381	ASPA	1.98639	3.18995	0.000163598	0.0789241	1.YC/0.HA	GABA_neurons
ENSG00000065320	NTN1	1.64641	2.60585	0.000149333	0.076785	1.YC/0.HA	GABA_neurons
ENSG00000125430	HS3ST3B1	1.52338	2.36888	0.00118904	0.211336	1.YC/0.HA	GABA_neurons
ENSG00000258472	AC005726.1	-0.877818	4.80775	0.0017744	0.247442	1.YC/0.HA	GABA_neurons
ENSG00000108950	FAM20A	1.74703	2.33337	0.000391071	0.116136	1.YC/0.HA	GABA_neurons
ENSG00000267659	LINC01482	2.48159	2.93614	1.58326e-05	0.0267333	1.YC/0.HA	GABA_neurons
ENSG00000267109	AC011990.1	2.32219	0.591142	0.000907446	0.177627	1.YC/0.HA	GABA_neurons
ENSG00000132205	EMILIN2	1.98469	0.674141	0.000911714	0.177627	1.YC/0.HA	GABA_neurons
ENSG00000285095	AC025887.2	1.5301	3.80941	4.98315e-05	0.0510932	1.YC/0.HA	GABA_neurons
ENSG00000166960	CCDC178	-1.53703	3.64628	3.96433e-05	0.0510932	1.YC/0.HA	GABA_neurons
ENSG00000167210	LOXHD1	1.88782	2.66665	0.000124263	0.0740534	1.YC/0.HA	GABA_neurons
ENSG00000081913	PHLPP1	0.759498	7.11377	0.0012205	0.212688	1.YC/0.HA	GABA_neurons
ENSG00000264015	AC124254.2	1.68804	2.21965	9.17526e-05	0.0619697	1.YC/0.HA	GABA_neurons
ENSG00000105711	SCN1B	1.59679	3.98099	0.000575191	0.145861	1.YC/0.HA	GABA_neurons
ENSG00000142227	EMP3	-1.62271	1.30474	0.000708889	0.155699	1.YC/0.HA	GABA_neurons
ENSG00000167614	TTYH1	1.32485	3.50056	0.0005831	0.145861	1.YC/0.HA	GABA_neurons
ENSG00000215397	SCRT2	3.35365	0.160372	0.000369566	0.116136	1.YC/0.HA	GABA_neurons
ENSG00000064787	BCAS1	1.51657	4.85471	1.55226e-05	0.0267333	1.YC/0.HA	GABA_neurons
ENSG00000229425	AJ009632.2	4.10662	4.36104	0.0016591	0.241846	1.YC/0.HA	GABA_neurons
ENSG00000154642	C21orf91	1.67029	2.50599	0.00126677	0.213686	1.YC/0.HA	GABA_neurons
ENSG00000070371	CLTCL1	-1.06187	4.63913	0.00147856	0.231014	1.YC/0.HA	GABA_neurons
ENSG00000100362	PVALB	2.85893	2.37808	0.000412682	0.116136	1.YC/0.HA	GABA_neurons
ENSG00000158352	SHROOM4	1.61338	4.20133	7.36566e-05	0.0596972	1.YC/0.HA	GABA_neurons
ENSG00000175556	LONRF3	-1.24696	4.28717	0.000654084	0.150475	1.YC/0.HA	GABA_neurons
ENSG00000185985	SLITRK2	0.948593	4.06888	0.000214327	0.0965041	1.YC/0.HA	GABA_neurons
ENSG00000198899	MT-ATP6	-2.09242	9.10927	0.000265683	0.105355	1.YC/0.HA	GABA_neurons
ENSG00000171729	TMEM51	1.86605	3.83255	6.46541e-07	0.00655011	2.MCI/0.HA	GABA_neurons
ENSG00000232878	DPYD-AS1	-1.60114	2.5772	5.5789e-05	0.140627	2.MCI/0.HA	GABA_neurons
ENSG00000235026	DPP10-AS1	-1.10857	4.07478	5.36839e-05	0.140627	2.MCI/0.HA	GABA_neurons
ENSG00000287149	AC092640.1	2.03827	5.76533	1.59365e-07	0.00322906	2.MCI/0.HA	GABA_neurons
ENSG00000138764	CCNG2	1.13885	4.9614	4.43086e-05	0.140627	2.MCI/0.HA	GABA_neurons
ENSG00000231171	LINC01098	-2.51399	1.65195	4.95356e-05	0.140627	2.MCI/0.HA	GABA_neurons
ENSG00000223838	AC007091.1	-2.33476	2.35518	0.000104212	0.211153	2.MCI/0.HA	GABA_neurons
ENSG00000132334	PTPRE	0.927334	7.76044	6.24639e-05	0.140627	2.MCI/0.HA	GABA_neurons
ENSG00000255028	AP003049.2	-1.89258	3.29315	3.03511e-05	0.140627	2.MCI/0.HA	GABA_neurons
ENSG00000265204	AC090772.2	-1.81085	2.1948	1.23164e-05	0.0831847	2.MCI/0.HA	GABA_neurons
ENSG00000188290	HES4	-1.25467	3.51632	0.00375977	0.0787808	3.AD/0.HA	GABA_neurons
ENSG00000160087	UBE2J2	0.685384	3.98566	0.0123686	0.159758	3.AD/0.HA	GABA_neurons
ENSG00000175756	AURKAIP1	-1.51446	3.21259	0.00284751	0.0665911	3.AD/0.HA	GABA_neurons
ENSG00000224870	MRPL20-AS1	-2.55263	0.820855	0.0221113	0.219509	3.AD/0.HA	GABA_neurons
ENSG00000215014	AL645728.1	-2.18572	1.75551	0.00693127	0.114584	3.AD/0.HA	GABA_neurons
ENSG00000286989	AL691432.4	-1.43463	1.88306	0.0201729	0.208539	3.AD/0.HA	GABA_neurons
ENSG00000116151	MORN1	-0.85812	3.27509	0.024688	0.233029	3.AD/0.HA	GABA_neurons
ENSG00000157911	PEX10	-1.27906	2.3764	0.0203794	0.209068	3.AD/0.HA	GABA_neurons
ENSG00000116251	RPL22	-0.810453	5.19857	0.000382363	0.0184903	3.AD/0.HA	GABA_neurons
ENSG00000215788	TNFRSF25	-0.82552	4.1499	0.00513142	0.0940931	3.AD/0.HA	GABA_neurons
ENSG00000116288	PARK7	-0.711176	4.61616	0.0110291	0.150182	3.AD/0.HA	GABA_neurons
ENSG00000074800	ENO1	-0.720767	4.91872	0.00825882	0.126868	3.AD/0.HA	GABA_neurons
ENSG00000171621	SPSB1	1.31094	2.39639	0.0130861	0.164919	3.AD/0.HA	GABA_neurons
ENSG00000241563	CORT	-3.29285	2.34167	4.71087e-05	0.00471482	3.AD/0.HA	GABA_neurons
ENSG00000160049	DFFA	0.711212	4.22755	0.0203888	0.209068	3.AD/0.HA	GABA_neurons
ENSG00000116649	SRM	-0.758492	4.00122	0.00852562	0.129108	3.AD/0.HA	GABA_neurons
ENSG00000231606	AL357873.1	-0.785116	5.35279	0.0111915	0.151376	3.AD/0.HA	GABA_neurons
ENSG00000234593	KAZN-AS1	-0.834464	5.05588	0.010391	0.144802	3.AD/0.HA	GABA_neurons
ENSG00000171729	TMEM51	1.18695	3.24908	0.00182414	0.0507395	3.AD/0.HA	GABA_neurons
ENSG00000142634	EFHD2	-1.12999	3.86692	0.0168163	0.187524	3.AD/0.HA	GABA_neurons
ENSG00000065526	SPEN	0.439128	6.28483	0.0129136	0.163739	3.AD/0.HA	GABA_neurons
ENSG00000117115	PADI2	1.13293	3.06026	0.00312846	0.0705036	3.AD/0.HA	GABA_neurons
ENSG00000117154	IGSF21	0.752864	4.98676	0.0138467	0.170291	3.AD/0.HA	GABA_neurons
ENSG00000173436	MICOS10	-0.545179	4.97588	0.0183417	0.196739	3.AD/0.HA	GABA_neurons
ENSG00000162545	CAMK2N1	-0.66225	6.2394	0.000568351	0.0242952	3.AD/0.HA	GABA_neurons
ENSG00000158828	PINK1	-0.952169	4.13863	0.00669476	0.112107	3.AD/0.HA	GABA_neurons
ENSG00000240553	AL031428.1	-1.44086	3.63466	0.000125791	0.00884992	3.AD/0.HA	GABA_neurons
ENSG00000142676	RPL11	-1.02305	4.86852	0.000992719	0.0343562	3.AD/0.HA	GABA_neurons
ENSG00000011007	ELOA	0.686692	4.03305	0.0140808	0.172182	3.AD/0.HA	GABA_neurons
ENSG00000057757	PITHD1	-1.22956	4.42861	0.000277312	0.0147091	3.AD/0.HA	GABA_neurons
ENSG00000183726	TMEM50A	-0.733203	4.70888	0.00440999	0.086798	3.AD/0.HA	GABA_neurons
ENSG00000157978	LDLRAP1	1.69963	1.74433	0.000927083	0.0329272	3.AD/0.HA	GABA_neurons
ENSG00000117632	STMN1	-1.45217	5.7745	3.44733e-08	2.40861e-05	3.AD/0.HA	GABA_neurons
ENSG00000117682	DHDDS	-0.725725	4.64558	0.00450428	0.0878264	3.AD/0.HA	GABA_neurons
ENSG00000198830	HMGN2	-0.893767	4.43699	0.00123509	0.0395347	3.AD/0.HA	GABA_neurons
ENSG00000117713	ARID1A	0.445255	6.57883	0.0207703	0.211588	3.AD/0.HA	GABA_neurons
ENSG00000253368	TRNP1	-1.36062	2.94686	0.00281481	0.0660878	3.AD/0.HA	GABA_neurons
ENSG00000158195	WASF2	0.658604	5.27727	0.00477557	0.0906924	3.AD/0.HA	GABA_neurons
ENSG00000126705	AHDC1	0.695264	5.09919	0.00191856	0.0519011	3.AD/0.HA	GABA_neurons
ENSG00000130770	ATP5IF1	-1.21834	5.10557	0.0104329	0.145087	3.AD/0.HA	GABA_neurons
ENSG00000242125	SNHG3	-1.70552	3.04046	6.03148e-05	0.00561639	3.AD/0.HA	GABA_neurons
ENSG00000120656	TAF12	0.717595	3.89355	0.0138893	0.170606	3.AD/0.HA	GABA_neurons
ENSG00000121769	FABP3	-1.55326	2.95117	0.000965726	0.0339714	3.AD/0.HA	GABA_neurons
ENSG00000176261	ZBTB8OS	0.439252	6.79955	0.0210122	0.213156	3.AD/0.HA	GABA_neurons
ENSG00000121905	HPCA	-1.07985	2.9788	0.0247161	0.233146	3.AD/0.HA	GABA_neurons
ENSG00000121900	TMEM54	-1.97973	1.88551	0.00510669	0.0937244	3.AD/0.HA	GABA_neurons
ENSG00000020129	NCDN	-0.92747	4.88046	0.000532909	0.0232899	3.AD/0.HA	GABA_neurons
ENSG00000119535	CSF3R	2.53923	0.796592	0.00936945	0.137433	3.AD/0.HA	GABA_neurons
ENSG00000197982	C1orf122	-1.14774	3.56071	0.0033133	0.0731308	3.AD/0.HA	GABA_neurons
ENSG00000228436	AL139260.1	0.573876	7.28517	0.00913222	0.1354	3.AD/0.HA	GABA_neurons
ENSG00000168653	NDUFS5	-1.24832	4.61729	0.00136719	0.0418273	3.AD/0.HA	GABA_neurons
ENSG00000117013	KCNQ4	-0.951655	3.34215	0.00845107	0.128385	3.AD/0.HA	GABA_neurons
ENSG00000287400	AC093151.8	3.4751	1.98383	6.31111e-07	0.000199806	3.AD/0.HA	GABA_neurons
ENSG00000117410	ATP6V0B	-1.25746	4.6694	0.00946118	0.137963	3.AD/0.HA	GABA_neurons
ENSG00000187147	RNF220	2.01826	6.8593	2.01676e-11	8.17272e-08	3.AD/0.HA	GABA_neurons
ENSG00000142937	RPS8	-1.32336	5.82631	3.11995e-06	0.000618259	3.AD/0.HA	GABA_neurons
ENSG00000126088	UROD	-2.06384	1.94494	0.00264631	0.0636526	3.AD/0.HA	GABA_neurons
ENSG00000117450	PRDX1	-0.759076	4.03968	0.0149051	0.176716	3.AD/0.HA	GABA_neurons
ENSG00000229846	AC099788.1	-1.68013	3.10207	0.000417389	0.0197136	3.AD/0.HA	GABA_neurons
ENSG00000182183	SHISAL2A	1.5522	1.03403	0.015064	0.177711	3.AD/0.HA	GABA_neurons
ENSG00000174348	PODN	-1.3506	2.1925	0.0144984	0.174757	3.AD/0.HA	GABA_neurons
ENSG00000226759	DAB1-AS1	-1.64773	1.67805	0.0268613	0.242402	3.AD/0.HA	GABA_neurons
ENSG00000234807	LINC01135	0.775315	4.37464	0.00335766	0.0736607	3.AD/0.HA	GABA_neurons
ENSG00000134716	CYP2J2	1.35039	1.96963	0.0264134	0.240513	3.AD/0.HA	GABA_neurons
ENSG00000162599	NFIA	0.710824	7.18498	0.000592967	0.0251353	3.AD/0.HA	GABA_neurons
ENSG00000237928	NFIA-AS2	1.38438	1.95192	0.0107435	0.147796	3.AD/0.HA	GABA_neurons
ENSG00000125703	ATG4C	0.633346	6.08794	0.00114333	0.0377913	3.AD/0.HA	GABA_neurons
ENSG00000142856	ITGB3BP	-0.711917	5.4614	0.000644416	0.0262719	3.AD/0.HA	GABA_neurons
ENSG00000286429	BX004807.1	-4.84665	0.755101	0.00735615	0.118294	3.AD/0.HA	GABA_neurons
ENSG00000116652	DLEU2L	-0.949081	3.00447	0.0148828	0.176716	3.AD/0.HA	GABA_neurons
ENSG00000229294	AL139294.1	-1.14663	4.45017	0.00443616	0.0870983	3.AD/0.HA	GABA_neurons
ENSG00000184588	PDE4B	0.974877	9.53504	2.82852e-07	0.00011005	3.AD/0.HA	GABA_neurons
ENSG00000237919	AL158840.1	-2.65021	2.9005	2.41525e-07	9.98618e-05	3.AD/0.HA	GABA_neurons
ENSG00000050628	PTGER3	-0.723054	3.76481	0.0232284	0.225625	3.AD/0.HA	GABA_neurons
ENSG00000286863	AL513166.1	-0.591739	7.55978	0.00685532	0.113575	3.AD/0.HA	GABA_neurons
ENSG00000225087	AL583808.1	-2.33326	3.34745	1.64352e-05	0.00222007	3.AD/0.HA	GABA_neurons
ENSG00000178965	ERICH3	-0.610929	5.94142	0.00631925	0.107869	3.AD/0.HA	GABA_neurons
ENSG00000234497	ERICH3-AS1	-3.01635	2.10288	6.60595e-05	0.00589647	3.AD/0.HA	GABA_neurons
ENSG00000137955	RABGGTB	-1.0874	3.82451	0.000607899	0.0253964	3.AD/0.HA	GABA_neurons
ENSG00000184005	ST6GALNAC3	0.563971	7.66412	0.00413367	0.0840441	3.AD/0.HA	GABA_neurons
ENSG00000287870	AC093433.2	1.62014	1.95187	0.0074142	0.11885	3.AD/0.HA	GABA_neurons
ENSG00000154027	AK5	0.686803	7.95709	0.00560992	0.10006	3.AD/0.HA	GABA_neurons
ENSG00000137941	TTLL7	0.405792	8.34417	0.0253868	0.235962	3.AD/0.HA	GABA_neurons
ENSG00000142871	CCN1	-2.24495	1.1575	0.0280223	0.24708	3.AD/0.HA	GABA_neurons
ENSG00000143013	LMO4	-0.734411	5.66243	0.0117904	0.155212	3.AD/0.HA	GABA_neurons
ENSG00000171492	LRRC8D	0.58353	7.01422	0.000903245	0.0323921	3.AD/0.HA	GABA_neurons
ENSG00000287372	AL627316.1	2.07812	1.14476	0.013893	0.170606	3.AD/0.HA	GABA_neurons
ENSG00000122406	RPL5	-0.616698	5.60454	0.016613	0.186696	3.AD/0.HA	GABA_neurons
ENSG00000117525	F3	-2.55566	2.04296	0.023724	0.227926	3.AD/0.HA	GABA_neurons
ENSG00000232878	DPYD-AS1	-1.12594	2.77775	0.0116541	0.1541	3.AD/0.HA	GABA_neurons
ENSG00000241073	AC093019.2	-3.43866	1.99762	1.11325e-05	0.00161119	3.AD/0.HA	GABA_neurons
ENSG00000137996	RTCA	-0.610949	4.43457	0.0261773	0.239353	3.AD/0.HA	GABA_neurons
ENSG00000181656	GPR88	-4.34066	0.529297	0.0199869	0.207209	3.AD/0.HA	GABA_neurons
ENSG00000273204	AC104506.1	-4.56101	0.6012	0.0188371	0.200777	3.AD/0.HA	GABA_neurons
ENSG00000134215	VAV3	0.941481	5.76067	0.00130435	0.0406595	3.AD/0.HA	GABA_neurons
ENSG00000270066	AL356488.2	1.17509	1.97062	0.0227776	0.223172	3.AD/0.HA	GABA_neurons
ENSG00000116299	KIAA1324	0.463133	6.15403	0.0147075	0.176044	3.AD/0.HA	GABA_neurons
ENSG00000134243	SORT1	0.74579	6.99659	9.27029e-05	0.0072244	3.AD/0.HA	GABA_neurons
ENSG00000162650	ATXN7L2	-1.33254	2.34486	0.0208455	0.21214	3.AD/0.HA	GABA_neurons
ENSG00000134248	LAMTOR5	-1.13955	3.39448	0.00346418	0.0750708	3.AD/0.HA	GABA_neurons
ENSG00000134242	PTPN22	1.43201	2.41455	0.00419554	0.084503	3.AD/0.HA	GABA_neurons
ENSG00000188761	BCL2L15	1.51095	2.15896	0.0229114	0.223617	3.AD/0.HA	GABA_neurons
ENSG00000134250	NOTCH2	0.616679	4.00337	0.0252109	0.235729	3.AD/0.HA	GABA_neurons
ENSG00000131779	PEX11B	-1.19536	2.82913	0.00954803	0.138733	3.AD/0.HA	GABA_neurons
ENSG00000234222	LIX1L-AS1	-1.20776	2.51511	0.016122	0.183519	3.AD/0.HA	GABA_neurons
ENSG00000265972	TXNIP	1.13316	2.77283	0.0253008	0.235886	3.AD/0.HA	GABA_neurons
ENSG00000278811	LINC00624	-0.951769	2.90296	0.0225593	0.221808	3.AD/0.HA	GABA_neurons
ENSG00000159164	SV2A	-0.615744	6.08686	0.008026	0.125191	3.AD/0.HA	GABA_neurons
ENSG00000266472	MRPS21	-0.851	4.69253	0.00217527	0.0555806	3.AD/0.HA	GABA_neurons
ENSG00000143369	ECM1	-1.62446	2.31933	0.0115074	0.153188	3.AD/0.HA	GABA_neurons
ENSG00000213190	MLLT11	-0.946433	4.5085	0.00247971	0.0609986	3.AD/0.HA	GABA_neurons
ENSG00000285651	AL450992.2	-2.10178	1.95118	0.00208092	0.0542336	3.AD/0.HA	GABA_neurons
ENSG00000197956	S100A6	-1.14694	3.69377	0.00945924	0.137963	3.AD/0.HA	GABA_neurons
ENSG00000143614	GATAD2B	0.438379	6.95605	0.0210189	0.213156	3.AD/0.HA	GABA_neurons
ENSG00000143543	JTB	-1.05149	3.41067	0.0177324	0.19309	3.AD/0.HA	GABA_neurons
ENSG00000177954	RPS27	-1.0719	5.073	0.00166544	0.0475283	3.AD/0.HA	GABA_neurons
ENSG00000163344	PMVK	-1.82874	2.86499	0.000146336	0.00988441	3.AD/0.HA	GABA_neurons
ENSG00000143590	EFNA3	-1.23117	2.23875	0.0250155	0.234551	3.AD/0.HA	GABA_neurons
ENSG00000160752	FDPS	-0.750165	4.28029	0.00415519	0.0841925	3.AD/0.HA	GABA_neurons
ENSG00000116586	LAMTOR2	-1.75195	2.59979	0.000812902	0.0300378	3.AD/0.HA	GABA_neurons
ENSG00000163382	NAXE	-1.41917	2.65722	0.0059078	0.103729	3.AD/0.HA	GABA_neurons
ENSG00000163568	AIM2	1.55293	2.74328	0.013591	0.168945	3.AD/0.HA	GABA_neurons
ENSG00000162729	IGSF8	-0.741434	4.17756	0.0196501	0.205232	3.AD/0.HA	GABA_neurons
ENSG00000162734	PEA15	-1.11475	4.14582	6.86807e-05	0.00597256	3.AD/0.HA	GABA_neurons
ENSG00000215845	TSTD1	-3.76325	2.23484	2.03436e-06	0.000433896	3.AD/0.HA	GABA_neurons
ENSG00000143222	UFC1	-1.21622	2.70681	0.00970415	0.139735	3.AD/0.HA	GABA_neurons
ENSG00000162745	OLFML2B	1.58402	1.63496	0.0278051	0.246463	3.AD/0.HA	GABA_neurons
ENSG00000143183	TMCO1	-0.552178	4.96188	0.0255483	0.236067	3.AD/0.HA	GABA_neurons
ENSG00000143158	MPC2	-0.802187	4.13653	0.00692997	0.114584	3.AD/0.HA	GABA_neurons
ENSG00000143153	ATP1B1	-0.869068	8.49173	3.92519e-05	0.00419477	3.AD/0.HA	GABA_neurons
ENSG00000213062	Z99572.1	-1.33315	2.98863	0.000800752	0.0297704	3.AD/0.HA	GABA_neurons
ENSG00000234741	GAS5	-0.876608	4.30336	0.0095003	0.138329	3.AD/0.HA	GABA_neurons
ENSG00000116194	ANGPTL1	-1.16265	2.65627	0.0220443	0.219293	3.AD/0.HA	GABA_neurons
ENSG00000143322	ABL2	0.438427	6.6912	0.0160124	0.182888	3.AD/0.HA	GABA_neurons
ENSG00000162782	TDRD5	-2.21801	2.51001	0.00220887	0.0561557	3.AD/0.HA	GABA_neurons
ENSG00000135824	RGS8	0.835416	4.23541	0.00170374	0.0484082	3.AD/0.HA	GABA_neurons
ENSG00000135838	NPL	0.697355	4.51899	0.00679102	0.113205	3.AD/0.HA	GABA_neurons
ENSG00000198756	COLGALT2	0.39373	6.39493	0.0286111	0.249974	3.AD/0.HA	GABA_neurons
ENSG00000116703	PDC	-1.972	2.38697	0.000539455	0.0234057	3.AD/0.HA	GABA_neurons
ENSG00000225811	AL354771.1	-1.37948	3.48053	0.00183715	0.0507829	3.AD/0.HA	GABA_neurons
ENSG00000162630	B3GALT2	-0.743015	5.01947	0.00316005	0.0708391	3.AD/0.HA	GABA_neurons
ENSG00000066279	ASPM	-1.41041	3.13635	0.00108683	0.0366413	3.AD/0.HA	GABA_neurons
ENSG00000203721	LINC00862	1.51493	4.4176	1.84223e-06	0.000410191	3.AD/0.HA	GABA_neurons
ENSG00000260088	DDX59-AS1	-1.45187	1.89309	0.0178994	0.193842	3.AD/0.HA	GABA_neurons
ENSG00000159348	CYB5R1	-1.03173	3.39031	0.00768386	0.121633	3.AD/0.HA	GABA_neurons
ENSG00000133048	CHI3L1	-2.88881	1.00462	0.0117208	0.154585	3.AD/0.HA	GABA_neurons
ENSG00000182004	SNRPE	-0.831184	3.25475	0.0214801	0.216532	3.AD/0.HA	GABA_neurons
ENSG00000133056	PIK3C2B	0.779454	5.14249	0.000212063	0.0125272	3.AD/0.HA	GABA_neurons
ENSG00000184144	CNTN2	0.988227	4.20982	0.00209897	0.0544778	3.AD/0.HA	GABA_neurons
ENSG00000117266	CDK18	1.17224	4.26384	0.0111043	0.150903	3.AD/0.HA	GABA_neurons
ENSG00000162877	PM20D1	-2.83911	1.96441	8.04646e-05	0.0066007	3.AD/0.HA	GABA_neurons
ENSG00000123838	C4BPA	-2.33768	1.60499	0.00535743	0.0968352	3.AD/0.HA	GABA_neurons
ENSG00000076356	PLXNA2	0.441733	6.80832	0.0275186	0.245199	3.AD/0.HA	GABA_neurons
ENSG00000232537	AC092810.3	2.22186	1.30321	0.00414884	0.0841479	3.AD/0.HA	GABA_neurons
ENSG00000196878	LAMB3	-1.97964	1.37626	0.0202902	0.208873	3.AD/0.HA	GABA_neurons
ENSG00000287343	AL022397.1	-1.56702	1.77814	0.0228852	0.223577	3.AD/0.HA	GABA_neurons
ENSG00000117691	NENF	-0.917377	3.89278	0.0127475	0.162754	3.AD/0.HA	GABA_neurons
ENSG00000196482	ESRRG	0.641266	8.3463	0.000773841	0.0292821	3.AD/0.HA	GABA_neurons
ENSG00000143507	DUSP10	0.910582	4.71264	0.000133678	0.00924432	3.AD/0.HA	GABA_neurons
ENSG00000236230	AL356108.1	0.956846	5.05112	2.2399e-05	0.00275059	3.AD/0.HA	GABA_neurons
ENSG00000143753	DEGS1	-0.693249	4.20315	0.0260908	0.238777	3.AD/0.HA	GABA_neurons
ENSG00000143742	SRP9	-0.94297	4.73776	0.000847901	0.0309493	3.AD/0.HA	GABA_neurons
ENSG00000196187	TMEM63A	1.53867	3.71247	3.0993e-05	0.00343158	3.AD/0.HA	GABA_neurons
ENSG00000163041	H3F3A	-0.557771	5.23127	0.0162905	0.184814	3.AD/0.HA	GABA_neurons
ENSG00000143772	ITPKB	0.942504	4.87594	0.000850792	0.0309493	3.AD/0.HA	GABA_neurons
ENSG00000143761	ARF1	-0.762021	4.68099	0.00845252	0.128385	3.AD/0.HA	GABA_neurons
ENSG00000143774	GUK1	-1.13464	4.13691	0.00605359	0.104925	3.AD/0.HA	GABA_neurons
ENSG00000168159	RNF187	-1.23972	3.35655	0.00345617	0.0750578	3.AD/0.HA	GABA_neurons
ENSG00000116574	RHOU	0.928947	3.42918	0.00910161	0.135203	3.AD/0.HA	GABA_neurons
ENSG00000143633	C1orf131	-0.929313	3.54529	0.00435402	0.0861534	3.AD/0.HA	GABA_neurons
ENSG00000162946	DISC1	0.811348	5.57542	0.00242897	0.0603136	3.AD/0.HA	GABA_neurons
ENSG00000286263	AL391832.4	0.945095	5.94657	0.0204166	0.209141	3.AD/0.HA	GABA_neurons
ENSG00000173726	TOMM20	-0.994166	5.81569	0.00212155	0.0548302	3.AD/0.HA	GABA_neurons
ENSG00000116962	NID1	1.01912	3.01444	0.0101517	0.142256	3.AD/0.HA	GABA_neurons
ENSG00000133019	CHRM3	0.785713	9.84867	0.000276186	0.0146879	3.AD/0.HA	GABA_neurons
ENSG00000182901	RGS7	0.493685	10.2654	0.00478483	0.0906924	3.AD/0.HA	GABA_neurons
ENSG00000235096	AC118555.1	-2.34867	1.88907	0.00184035	0.0507829	3.AD/0.HA	GABA_neurons
ENSG00000203663	OR2L2	1.03783	3.3144	0.0115739	0.153576	3.AD/0.HA	GABA_neurons
ENSG00000198128	OR2L3	0.939102	3.69579	0.0101521	0.142256	3.AD/0.HA	GABA_neurons
ENSG00000035115	SH3YL1	0.497005	6.42657	0.00482749	0.0910751	3.AD/0.HA	GABA_neurons
ENSG00000130508	PXDN	0.787589	3.77315	0.0237646	0.228085	3.AD/0.HA	GABA_neurons
ENSG00000186487	MYT1L	0.452997	10.0767	0.017961	0.194301	3.AD/0.HA	GABA_neurons
ENSG00000171863	RPS7	-1.42804	4.87014	0.00054356	0.023487	3.AD/0.HA	GABA_neurons
ENSG00000232044	SILC1	0.453946	6.81209	0.0113965	0.152641	3.AD/0.HA	GABA_neurons
ENSG00000226506	AC007463.1	1.7774	1.75709	0.00267626	0.0641924	3.AD/0.HA	GABA_neurons
ENSG00000115738	ID2	-1.178	4.919	0.00826503	0.126868	3.AD/0.HA	GABA_neurons
ENSG00000240687	AC082651.1	2.62441	0.888394	0.0142812	0.173145	3.AD/0.HA	GABA_neurons
ENSG00000162975	KCNF1	-1.83079	2.0374	0.0173379	0.19086	3.AD/0.HA	GABA_neurons
ENSG00000163032	VSNL1	-0.526241	7.40212	0.0151185	0.177827	3.AD/0.HA	GABA_neurons
ENSG00000119771	KLHL29	0.562397	8.27402	0.00249911	0.0612298	3.AD/0.HA	GABA_neurons
ENSG00000224361	AC011239.1	-2.98157	1.05765	0.00706797	0.115793	3.AD/0.HA	GABA_neurons
ENSG00000232642	AC008073.2	-4.55453	0.597698	0.0158469	0.18151	3.AD/0.HA	GABA_neurons
ENSG00000119772	DNMT3A	0.476478	6.45719	0.0124848	0.1606	3.AD/0.HA	GABA_neurons
ENSG00000235072	AC012074.1	0.962019	2.53286	0.0225782	0.221808	3.AD/0.HA	GABA_neurons
ENSG00000230286	AC013472.2	-1.69175	1.46544	0.0209344	0.212618	3.AD/0.HA	GABA_neurons
ENSG00000115194	SLC30A3	-2.10231	1.77417	0.0157205	0.180572	3.AD/0.HA	GABA_neurons
ENSG00000115226	FNDC4	-1.38739	2.35641	0.00889776	0.133249	3.AD/0.HA	GABA_neurons
ENSG00000075426	FOSL2	0.952659	2.48179	0.0255254	0.236067	3.AD/0.HA	GABA_neurons
ENSG00000189350	TOGARAM2	1.21365	4.88757	2.87863e-07	0.00011005	3.AD/0.HA	GABA_neurons
ENSG00000171094	ALK	0.501743	8.75555	0.0286581	0.249974	3.AD/0.HA	GABA_neurons
ENSG00000286963	AC074096.1	-2.56272	1.34938	0.00611633	0.105657	3.AD/0.HA	GABA_neurons
ENSG00000152683	SLC30A6	0.432801	5.3714	0.0230711	0.224528	3.AD/0.HA	GABA_neurons
ENSG00000272054	AC007390.2	1.05932	2.36153	0.0136938	0.169023	3.AD/0.HA	GABA_neurons
ENSG00000235848	RMDN2-AS1	-1.46136	2.16886	0.00820483	0.126616	3.AD/0.HA	GABA_neurons
ENSG00000115875	SRSF7	-0.655142	5.10316	0.0089807	0.134095	3.AD/0.HA	GABA_neurons
ENSG00000227028	SLC8A1-AS1	-0.829207	4.99185	0.0196396	0.205228	3.AD/0.HA	GABA_neurons
ENSG00000138036	DYNC2LI1	-0.411622	5.67701	0.0283282	0.248399	3.AD/0.HA	GABA_neurons
ENSG00000143919	CAMKMT	0.668721	7.14748	0.00187877	0.0513042	3.AD/0.HA	GABA_neurons
ENSG00000205054	LINC01121	-4.4696	0.556052	0.0217497	0.217892	3.AD/0.HA	GABA_neurons
ENSG00000143933	CALM2	-0.724666	7.34949	0.00485215	0.0912005	3.AD/0.HA	GABA_neurons
ENSG00000234690	EPCAM-DT	1.31705	3.39799	0.000708013	0.0281228	3.AD/0.HA	GABA_neurons
ENSG00000170802	FOXN2	0.552469	5.05993	0.0256687	0.236502	3.AD/0.HA	GABA_neurons
ENSG00000282998	AC009975.2	-3.02527	1.12283	0.0100222	0.141351	3.AD/0.HA	GABA_neurons
ENSG00000283058	AC009234.1	-1.54272	2.09326	0.00577731	0.102464	3.AD/0.HA	GABA_neurons
ENSG00000228108	AC092839.1	-1.46312	2.81888	0.00468769	0.089945	3.AD/0.HA	GABA_neurons
ENSG00000285519	AC104781.2	-1.31836	3.4117	0.000214012	0.0126056	3.AD/0.HA	GABA_neurons
ENSG00000143947	RPS27A	-1.85233	5.63076	1.67965e-06	0.000382395	3.AD/0.HA	GABA_neurons
ENSG00000240401	AC012358.3	-0.934912	4.17471	0.00433398	0.086009	3.AD/0.HA	GABA_neurons
ENSG00000285755	AC132153.1	0.988203	3.46911	0.00426118	0.0852319	3.AD/0.HA	GABA_neurons
ENSG00000028116	VRK2	1.47265	4.76424	0.0016111	0.0466344	3.AD/0.HA	GABA_neurons
ENSG00000231609	AC007098.1	-1.32155	3.93047	6.81366e-05	0.00595079	3.AD/0.HA	GABA_neurons
ENSG00000286480	AC009501.3	-1.3395	3.07841	0.00582949	0.103069	3.AD/0.HA	GABA_neurons
ENSG00000014641	MDH1	-0.791401	6.0367	0.00121637	0.0392464	3.AD/0.HA	GABA_neurons
ENSG00000232613	LINC02576	-1.10363	2.27097	0.0279045	0.246532	3.AD/0.HA	GABA_neurons
ENSG00000198369	SPRED2	0.541373	6.44868	0.017047	0.189368	3.AD/0.HA	GABA_neurons
ENSG00000143995	MEIS1	1.14989	4.22277	1.4945e-05	0.00205996	3.AD/0.HA	GABA_neurons
ENSG00000169621	APLF	0.982598	2.90448	0.0122945	0.15938	3.AD/0.HA	GABA_neurons
ENSG00000135617	PRADC1	-1.89344	2.3545	0.000595493	0.0251897	3.AD/0.HA	GABA_neurons
ENSG00000286244	AC073046.3	-1.69684	1.88603	0.00813607	0.125938	3.AD/0.HA	GABA_neurons
ENSG00000163170	BOLA3	-0.977994	3.41325	0.0153079	0.178463	3.AD/0.HA	GABA_neurons
ENSG00000204843	DCTN1	-0.716509	4.97305	0.00336275	0.0736607	3.AD/0.HA	GABA_neurons
ENSG00000005448	WDR54	-1.6481	2.18513	0.00759182	0.12079	3.AD/0.HA	GABA_neurons
ENSG00000115274	INO80B	-1.99272	2.27037	0.0011171	0.0374127	3.AD/0.HA	GABA_neurons
ENSG00000239779	WBP1	-1.63488	2.65082	0.00150584	0.0444125	3.AD/0.HA	GABA_neurons
ENSG00000286883	AC005041.5	-1.24297	2.26262	0.027863	0.246532	3.AD/0.HA	GABA_neurons
ENSG00000270571	AC007681.1	-0.958542	3.54135	0.0159193	0.18203	3.AD/0.HA	GABA_neurons
ENSG00000287749	AC073091.4	-3.17357	1.89499	0.026055	0.238557	3.AD/0.HA	GABA_neurons
ENSG00000234653	AC079117.1	-1.14994	3.80314	0.000284725	0.0150272	3.AD/0.HA	GABA_neurons
ENSG00000237031	AC008067.1	-1.42825	2.29452	0.0148305	0.176451	3.AD/0.HA	GABA_neurons
ENSG00000034510	TMSB10	-1.80011	5.22417	3.2117e-06	0.000625725	3.AD/0.HA	GABA_neurons
ENSG00000152291	TGOLN2	-0.551671	5.05245	0.0256788	0.236502	3.AD/0.HA	GABA_neurons
ENSG00000115548	KDM3A	0.604268	5.3158	0.00268474	0.0641924	3.AD/0.HA	GABA_neurons
ENSG00000228363	AC015971.1	-1.80405	2.6611	0.000879075	0.0316936	3.AD/0.HA	GABA_neurons
ENSG00000185304	RGPD2	-2.99368	1.68069	0.00294067	0.0675554	3.AD/0.HA	GABA_neurons
ENSG00000172005	MAL	1.34941	3.59303	1.20268e-05	0.00171611	3.AD/0.HA	GABA_neurons
ENSG00000144199	FAHD2B	-1.6368	2.9781	0.000123694	0.00876325	3.AD/0.HA	GABA_neurons
ENSG00000135940	COX5B	-1.40247	4.92587	0.000146837	0.00988441	3.AD/0.HA	GABA_neurons
ENSG00000168658	VWA3B	-4.63609	0.661719	0.0200311	0.207379	3.AD/0.HA	GABA_neurons
ENSG00000115539	PDCL3	-1.36403	2.2337	0.0177112	0.193042	3.AD/0.HA	GABA_neurons
ENSG00000071082	RPL31	-0.811129	5.70006	0.00502502	0.0930686	3.AD/0.HA	GABA_neurons
ENSG00000071054	MAP4K4	0.415965	7.80133	0.0178227	0.193528	3.AD/0.HA	GABA_neurons
ENSG00000170417	TMEM182	0.676648	4.32427	0.0100248	0.141351	3.AD/0.HA	GABA_neurons
ENSG00000269707	AC018730.1	0.599439	4.62018	0.0194064	0.203466	3.AD/0.HA	GABA_neurons
ENSG00000224509	AC010884.1	0.845408	3.72896	0.0047294	0.0905344	3.AD/0.HA	GABA_neurons
ENSG00000235522	AC010978.1	-5.19682	0.993506	0.00274318	0.0652375	3.AD/0.HA	GABA_neurons
ENSG00000282033	AC074387.1	-4.5501	0.617127	0.0254179	0.235962	3.AD/0.HA	GABA_neurons
ENSG00000175701	MTLN	-1.66881	2.92397	0.000931558	0.0329987	3.AD/0.HA	GABA_neurons
ENSG00000153208	MERTK	0.88565	4.19422	0.00182554	0.0507395	3.AD/0.HA	GABA_neurons
ENSG00000144152	FBLN7	0.92713	3.85211	0.000949223	0.0335351	3.AD/0.HA	GABA_neurons
ENSG00000231538	DPP10-AS3	-1.57904	2.30688	0.0215793	0.217044	3.AD/0.HA	GABA_neurons
ENSG00000286776	AC093610.1	-1.17712	2.58804	0.0206345	0.210734	3.AD/0.HA	GABA_neurons
ENSG00000235026	DPP10-AS1	-1.01203	4.14801	0.00258344	0.0626965	3.AD/0.HA	GABA_neurons
ENSG00000287451	AC016721.1	-3.0861	1.14043	0.00388636	0.0809305	3.AD/0.HA	GABA_neurons
ENSG00000136717	BIN1	0.506844	5.60289	0.0113697	0.152464	3.AD/0.HA	GABA_neurons
ENSG00000286145	AC068282.1	-1.17537	3.76625	0.00106859	0.0362069	3.AD/0.HA	GABA_neurons
ENSG00000163166	IWS1	0.720745	6.1074	0.000244259	0.0137155	3.AD/0.HA	GABA_neurons
ENSG00000152082	MZT2B	-1.36863	4.60693	0.000195536	0.011987	3.AD/0.HA	GABA_neurons
ENSG00000136718	IMP4	-1.43572	2.4858	0.00258373	0.0626965	3.AD/0.HA	GABA_neurons
ENSG00000163046	ANKRD30BL	0.519754	8.46202	0.0268697	0.242402	3.AD/0.HA	GABA_neurons
ENSG00000176771	NCKAP5	1.52164	7.46588	4.68346e-12	4.45889e-08	3.AD/0.HA	GABA_neurons
ENSG00000152127	MGAT5	0.407048	7.25968	0.0191715	0.202425	3.AD/0.HA	GABA_neurons
ENSG00000168702	LRP1B	0.701958	11.5187	0.00228235	0.0572338	3.AD/0.HA	GABA_neurons
ENSG00000075884	ARHGAP15	0.627322	4.5821	0.0286775	0.249974	3.AD/0.HA	GABA_neurons
ENSG00000257277	AC092652.2	1.68583	2.66829	0.000376774	0.0182636	3.AD/0.HA	GABA_neurons
ENSG00000287115	AC009951.6	-4.58352	0.611462	0.0168482	0.187777	3.AD/0.HA	GABA_neurons
ENSG00000226674	TEX41	0.727069	4.72096	0.0191429	0.202334	3.AD/0.HA	GABA_neurons
ENSG00000286335	AC009230.1	-1.75323	1.72116	0.00724947	0.117323	3.AD/0.HA	GABA_neurons
ENSG00000157827	FMNL2	0.669438	8.58764	0.000136098	0.00934785	3.AD/0.HA	GABA_neurons
ENSG00000177917	ARL6IP6	0.54236	5.08279	0.0112366	0.151885	3.AD/0.HA	GABA_neurons
ENSG00000144278	GALNT13	0.740467	8.81644	0.00722664	0.117313	3.AD/0.HA	GABA_neurons
ENSG00000162989	KCNJ3	0.464609	9.06869	0.0114989	0.153188	3.AD/0.HA	GABA_neurons
ENSG00000136541	ERMN	1.30378	3.04417	0.00622719	0.106864	3.AD/0.HA	GABA_neurons
ENSG00000234584	AC019186.1	1.24165	2.68759	0.00145025	0.0433142	3.AD/0.HA	GABA_neurons
ENSG00000115183	TANC1	1.14076	5.16946	2.10917e-05	0.00265441	3.AD/0.HA	GABA_neurons
ENSG00000153250	RBMS1	0.452266	7.5044	0.0217684	0.217892	3.AD/0.HA	GABA_neurons
ENSG00000182263	FIGN	0.558191	6.99597	0.0171981	0.190407	3.AD/0.HA	GABA_neurons
ENSG00000224490	TTC21B-AS1	-1.4124	2.13555	0.0285214	0.249633	3.AD/0.HA	GABA_neurons
ENSG00000236107	SCN1A-AS1	-0.68518	7.08721	0.00823546	0.126744	3.AD/0.HA	GABA_neurons
ENSG00000136546	SCN7A	-0.647977	6.40215	0.00248593	0.0609986	3.AD/0.HA	GABA_neurons
ENSG00000228222	AC073050.1	0.648717	9.61489	0.00344253	0.0749221	3.AD/0.HA	GABA_neurons
ENSG00000115935	WIPF1	1.02033	4.67588	0.000369831	0.0180102	3.AD/0.HA	GABA_neurons
ENSG00000154518	ATP5MC3	-1.50568	4.3044	0.00289598	0.0668984	3.AD/0.HA	GABA_neurons
ENSG00000155636	RBM45	-0.561629	4.92238	0.0140119	0.171546	3.AD/0.HA	GABA_neurons
ENSG00000287149	AC092640.1	1.43789	5.23555	1.91347e-07	8.42843e-05	3.AD/0.HA	GABA_neurons
ENSG00000170396	ZNF804A	0.772836	8.655	0.00939138	0.137491	3.AD/0.HA	GABA_neurons
ENSG00000128694	OSGEPL1	-0.743507	3.42704	0.0277787	0.246463	3.AD/0.HA	GABA_neurons
ENSG00000128699	ORMDL1	-0.844925	5.28387	0.00113472	0.0376295	3.AD/0.HA	GABA_neurons
ENSG00000115415	STAT1	-0.579683	4.51985	0.0201937	0.208539	3.AD/0.HA	GABA_neurons
ENSG00000233766	AC098617.1	-1.2685	4.92374	0.0014595	0.0434248	3.AD/0.HA	GABA_neurons
ENSG00000196950	SLC39A10	-0.572323	7.03168	0.00435337	0.0861534	3.AD/0.HA	GABA_neurons
ENSG00000162944	RFTN2	1.79178	4.47103	1.20781e-08	1.22363e-05	3.AD/0.HA	GABA_neurons
ENSG00000115896	PLCL1	0.944063	7.32103	0.00594546	0.10394	3.AD/0.HA	GABA_neurons
ENSG00000287299	AC012459.1	-1.06472	3.72897	0.00155177	0.045568	3.AD/0.HA	GABA_neurons
ENSG00000237166	LINC01792	1.92045	2.08925	0.000808259	0.0299944	3.AD/0.HA	GABA_neurons
ENSG00000119013	NDUFB3	-0.878936	3.29903	0.0272758	0.244433	3.AD/0.HA	GABA_neurons
ENSG00000082146	STRADB	-0.718011	4.85336	0.0115605	0.153499	3.AD/0.HA	GABA_neurons
ENSG00000114942	EEF1B2	-1.38275	3.87593	0.000128007	0.00894375	3.AD/0.HA	GABA_neurons
ENSG00000228577	AC010731.2	-4.04709	0.366519	0.0281786	0.24796	3.AD/0.HA	GABA_neurons
ENSG00000144410	CPO	-1.03392	3.22391	0.0109406	0.14948	3.AD/0.HA	GABA_neurons
ENSG00000163251	FZD5	1.50157	1.32953	0.0185911	0.198993	3.AD/0.HA	GABA_neurons
ENSG00000234281	LANCL1-AS1	-0.883853	4.19465	0.0103537	0.144481	3.AD/0.HA	GABA_neurons
ENSG00000273118	AC093865.1	0.925624	4.835	0.00110081	0.0369895	3.AD/0.HA	GABA_neurons
ENSG00000030419	IKZF2	0.78711	5.29618	0.00224031	0.0566706	3.AD/0.HA	GABA_neurons
ENSG00000115414	FN1	-1.22662	3.03032	0.00387681	0.0808629	3.AD/0.HA	GABA_neurons
ENSG00000118242	MREG	0.555577	4.13115	0.0287207	0.249974	3.AD/0.HA	GABA_neurons
ENSG00000197756	RPL37A	-0.865493	6.45613	0.0026054	0.0629209	3.AD/0.HA	GABA_neurons
ENSG00000115461	IGFBP5	-0.731511	4.80752	0.0153921	0.178848	3.AD/0.HA	GABA_neurons
ENSG00000135929	CYP27A1	1.0632	3.53246	0.000564379	0.0242276	3.AD/0.HA	GABA_neurons
ENSG00000144567	RETREG2	-1.44897	3.58912	0.0010672	0.0362069	3.AD/0.HA	GABA_neurons
ENSG00000158552	ZFAND2B	-1.8387	2.57745	0.00079314	0.0296573	3.AD/0.HA	GABA_neurons
ENSG00000198925	ATG9A	-1.32307	2.83507	0.00183916	0.0507829	3.AD/0.HA	GABA_neurons
ENSG00000127824	TUBA4A	-1.81012	3.61487	0.000451817	0.020949	3.AD/0.HA	GABA_neurons
ENSG00000188760	TMEM198	-2.76114	1.49341	0.0022579	0.0569366	3.AD/0.HA	GABA_neurons
ENSG00000114923	SLC4A3	-0.990997	4.01712	0.000465173	0.0213243	3.AD/0.HA	GABA_neurons
ENSG00000169047	IRS1	0.513764	5.39717	0.0225946	0.221808	3.AD/0.HA	GABA_neurons
ENSG00000153832	FBXO36	0.516776	5.02448	0.0170299	0.189282	3.AD/0.HA	GABA_neurons
ENSG00000135916	ITM2C	-1.48812	4.88632	3.6206e-06	0.000673032	3.AD/0.HA	GABA_neurons
ENSG00000163273	NPPC	-1.76426	3.31497	0.0012164	0.0392464	3.AD/0.HA	GABA_neurons
ENSG00000227033	AC019130.1	-1.47918	2.41337	0.00361062	0.0769142	3.AD/0.HA	GABA_neurons
ENSG00000115468	EFHD1	0.99979	4.20311	0.000315213	0.0161284	3.AD/0.HA	GABA_neurons
ENSG00000168918	INPP5D	1.55532	2.32444	0.000870114	0.0314265	3.AD/0.HA	GABA_neurons
ENSG00000130147	SH3BP4	1.48566	2.80596	0.00107772	0.0364553	3.AD/0.HA	GABA_neurons
ENSG00000157985	AGAP1	0.523688	8.56611	0.00994478	0.141008	3.AD/0.HA	GABA_neurons
ENSG00000227252	AC012063.1	0.728506	3.56328	0.0220826	0.21944	3.AD/0.HA	GABA_neurons
ENSG00000286864	AC012076.1	-2.09249	1.94877	0.00329302	0.0728418	3.AD/0.HA	GABA_neurons
ENSG00000188542	DUSP28	-1.62828	1.82844	0.0159862	0.182691	3.AD/0.HA	GABA_neurons
ENSG00000162804	SNED1	0.541148	5.46474	0.0278523	0.246532	3.AD/0.HA	GABA_neurons
ENSG00000224318	CHL1-AS2	1.30389	4.42415	0.000267719	0.0143506	3.AD/0.HA	GABA_neurons
ENSG00000234661	CHL1-AS1	-2.17528	2.82575	2.72002e-05	0.00311373	3.AD/0.HA	GABA_neurons
ENSG00000286363	AC087427.1	3.20075	0.337763	0.0026042	0.0629209	3.AD/0.HA	GABA_neurons
ENSG00000150995	ITPR1	1.21554	6.89453	0.000347752	0.0173979	3.AD/0.HA	GABA_neurons
ENSG00000233912	AC026202.2	-1.2054	2.90215	0.00448963	0.0878091	3.AD/0.HA	GABA_neurons
ENSG00000236202	GRM7-AS1	-1.43383	2.38272	0.00401352	0.0827282	3.AD/0.HA	GABA_neurons
ENSG00000227110	LMCD1-AS1	0.776628	7.24898	0.00729826	0.117856	3.AD/0.HA	GABA_neurons
ENSG00000114026	OGG1	0.698355	3.91012	0.0176608	0.192686	3.AD/0.HA	GABA_neurons
ENSG00000232287	SLC6A1-AS1	-1.7427	2.08437	0.00436433	0.0862732	3.AD/0.HA	GABA_neurons
ENSG00000285906	AC083855.2	-5.83996	1.37658	2.84843e-05	0.0032243	3.AD/0.HA	GABA_neurons
ENSG00000132170	PPARG	0.599961	5.36667	0.0193842	0.203466	3.AD/0.HA	GABA_neurons
ENSG00000144713	RPL32	-1.53658	5.71093	8.09247e-05	0.00661168	3.AD/0.HA	GABA_neurons
ENSG00000170860	LSM3	-1.11393	3.22653	0.0113691	0.152464	3.AD/0.HA	GABA_neurons
ENSG00000183960	KCNH8	1.36771	5.88141	2.35186e-05	0.00283651	3.AD/0.HA	GABA_neurons
ENSG00000114166	KAT2B	0.716561	5.9087	0.000363932	0.0178547	3.AD/0.HA	GABA_neurons
ENSG00000151789	ZNF385D	0.968838	11.4237	9.82675e-06	0.00151992	3.AD/0.HA	GABA_neurons
ENSG00000182247	UBE2E2	0.406846	8.75522	0.0175793	0.192432	3.AD/0.HA	GABA_neurons
ENSG00000174748	RPL15	-1.26276	5.50454	0.00362127	0.0769142	3.AD/0.HA	GABA_neurons
ENSG00000144642	RBMS3	0.512251	10.8472	0.0258687	0.23771	3.AD/0.HA	GABA_neurons
ENSG00000168028	RPSA	-1.36227	4.90479	8.57867e-07	0.000231761	3.AD/0.HA	GABA_neurons
ENSG00000168314	MOBP	2.17133	5.88312	1.05782e-05	0.00157599	3.AD/0.HA	GABA_neurons
ENSG00000114784	EIF1B	-1.31329	5.06582	1.03255e-06	0.00025829	3.AD/0.HA	GABA_neurons
ENSG00000188846	RPL14	-1.04456	5.47473	0.000220334	0.0128149	3.AD/0.HA	GABA_neurons
ENSG00000187094	CCK	-1.25002	7.71127	0.0114128	0.152739	3.AD/0.HA	GABA_neurons
ENSG00000232354	VIPR1-AS1	-2.73637	0.944372	0.0158809	0.181796	3.AD/0.HA	GABA_neurons
ENSG00000181061	HIGD1A	-1.52643	3.11502	0.000425589	0.0199613	3.AD/0.HA	GABA_neurons
ENSG00000144791	LIMD1	0.851542	3.07057	0.0174975	0.191685	3.AD/0.HA	GABA_neurons
ENSG00000114648	KLHL18	0.529886	5.01387	0.0234225	0.226966	3.AD/0.HA	GABA_neurons
ENSG00000232112	TMA7	-0.944496	4.86494	0.0113126	0.152313	3.AD/0.HA	GABA_neurons
ENSG00000178467	P4HTM	-0.736913	4.64196	0.00474074	0.0905344	3.AD/0.HA	GABA_neurons
ENSG00000164076	CAMKV	-1.01832	3.54554	0.00302696	0.0689127	3.AD/0.HA	GABA_neurons
ENSG00000213600	U73169.1	2.58299	0.788623	0.00368975	0.0780393	3.AD/0.HA	GABA_neurons
ENSG00000248487	ABHD14A	-1.58364	3.71436	4.82448e-05	0.00474532	3.AD/0.HA	GABA_neurons
ENSG00000162244	RPL29	-1.5845	4.63935	7.1563e-07	0.000221938	3.AD/0.HA	GABA_neurons
ENSG00000114902	SPCS1	-0.81696	4.22563	0.0177347	0.19309	3.AD/0.HA	GABA_neurons
ENSG00000157388	CACNA1D	0.468685	8.97298	0.00589626	0.103617	3.AD/0.HA	GABA_neurons
ENSG00000113811	SELENOK	-1.0432	3.70589	0.00268885	0.0641924	3.AD/0.HA	GABA_neurons
ENSG00000168297	PXK	0.69791	6.55224	0.00039325	0.0188465	3.AD/0.HA	GABA_neurons
ENSG00000241472	PTPRG-AS1	-0.794673	4.38874	0.00593571	0.103923	3.AD/0.HA	GABA_neurons
ENSG00000244342	LINC00698	-4.20218	0.424889	0.0163447	0.185134	3.AD/0.HA	GABA_neurons
ENSG00000226017	PRICKLE2-AS3	-1.57299	2.12416	0.0147843	0.176212	3.AD/0.HA	GABA_neurons
ENSG00000244513	AC109587.1	-1.47137	2.5198	0.00534951	0.0968262	3.AD/0.HA	GABA_neurons
ENSG00000144746	ARL6IP5	-0.750048	5.63155	0.00432926	0.0859995	3.AD/0.HA	GABA_neurons
ENSG00000114541	FRMD4B	1.2619	7.1605	2.21337e-10	4.61547e-07	3.AD/0.HA	GABA_neurons
ENSG00000187098	MITF	0.771797	6.0453	0.0021311	0.0549254	3.AD/0.HA	GABA_neurons
ENSG00000163602	RYBP	0.411322	6.75031	0.0191247	0.202247	3.AD/0.HA	GABA_neurons
ENSG00000172986	GXYLT2	0.801648	4.01468	0.00471142	0.0903149	3.AD/0.HA	GABA_neurons
ENSG00000242516	LINC00960	-1.22252	4.04561	0.000265803	0.0143454	3.AD/0.HA	GABA_neurons
ENSG00000169855	ROBO1	0.591155	11.441	0.00983689	0.140429	3.AD/0.HA	GABA_neurons
ENSG00000288105	AC117461.1	-1.06533	5.4469	0.00463807	0.0891618	3.AD/0.HA	GABA_neurons
ENSG00000239440	LINC02008	-1.0901	4.06094	0.015251	0.177959	3.AD/0.HA	GABA_neurons
ENSG00000175161	CADM2	0.659719	11.8503	0.000982528	0.0341475	3.AD/0.HA	GABA_neurons
ENSG00000206538	VGLL3	-1.28147	3.17029	0.0128876	0.163713	3.AD/0.HA	GABA_neurons
ENSG00000178750	STX19	-1.79219	1.76583	0.0098724	0.140572	3.AD/0.HA	GABA_neurons
ENSG00000282527	AC110491.3	-2.45104	1.27901	0.0110516	0.150286	3.AD/0.HA	GABA_neurons
ENSG00000080200	CRYBG3	0.601608	5.1185	0.0142271	0.172645	3.AD/0.HA	GABA_neurons
ENSG00000080819	CPOX	0.652415	3.93749	0.0173939	0.191229	3.AD/0.HA	GABA_neurons
ENSG00000168386	FILIP1L	-1.06926	5.12807	2.31423e-06	0.000483411	3.AD/0.HA	GABA_neurons
ENSG00000154175	ABI3BP	1.55493	7.36949	0.000334691	0.0169115	3.AD/0.HA	GABA_neurons
ENSG00000114391	RPL24	-1.02686	5.55374	0.00316053	0.0708391	3.AD/0.HA	GABA_neurons
ENSG00000144815	NXPE3	0.453934	5.6929	0.0187709	0.200387	3.AD/0.HA	GABA_neurons
ENSG00000170017	ALCAM	1.00038	9.26978	1.04321e-08	1.1125e-05	3.AD/0.HA	GABA_neurons
ENSG00000286854	AC079382.2	0.928867	5.20554	0.000308542	0.0159481	3.AD/0.HA	GABA_neurons
ENSG00000243701	DUBR	0.512788	7.21646	0.0116838	0.154327	3.AD/0.HA	GABA_neurons
ENSG00000272597	AC063944.3	1.04803	2.03572	0.0246717	0.233029	3.AD/0.HA	GABA_neurons
ENSG00000114439	BBX	0.386093	6.83378	0.0236499	0.227429	3.AD/0.HA	GABA_neurons
ENSG00000163507	CIP2A	-0.864093	3.68223	0.00709525	0.115845	3.AD/0.HA	GABA_neurons
ENSG00000242029	AC078980.1	-4.72211	0.659517	0.0173415	0.19086	3.AD/0.HA	GABA_neurons
ENSG00000144834	TAGLN3	-0.751317	5.10145	0.00602727	0.104697	3.AD/0.HA	GABA_neurons
ENSG00000091972	CD200	-0.553175	5.31639	0.0093095	0.136985	3.AD/0.HA	GABA_neurons
ENSG00000181722	ZBTB20	0.766641	8.76832	0.000259226	0.0142343	3.AD/0.HA	GABA_neurons
ENSG00000240922	LSAMP-AS1	-1.49681	2.96503	0.00164758	0.0472183	3.AD/0.HA	GABA_neurons
ENSG00000241397	LINC00903	-1.12171	2.89736	0.0138441	0.170291	3.AD/0.HA	GABA_neurons
ENSG00000242816	AC092691.3	-1.12757	4.29633	0.000262369	0.0142523	3.AD/0.HA	GABA_neurons
ENSG00000121578	B4GALT4	-0.73978	3.9353	0.0175913	0.192446	3.AD/0.HA	GABA_neurons
ENSG00000144840	RABL3	-1.10363	3.46582	0.00253655	0.0618479	3.AD/0.HA	GABA_neurons
ENSG00000287022	AC079841.2	-3.11636	2.17918	9.81489e-06	0.00151992	3.AD/0.HA	GABA_neurons
ENSG00000051341	POLQ	-1.30245	2.74552	0.00659453	0.111038	3.AD/0.HA	GABA_neurons
ENSG00000272758	AC083798.2	-0.934841	3.23083	0.0274971	0.245199	3.AD/0.HA	GABA_neurons
ENSG00000114626	ABTB1	-1.17763	2.79734	0.00482214	0.0910589	3.AD/0.HA	GABA_neurons
ENSG00000250592	AC055733.2	-2.1284	1.97657	0.00063796	0.0260612	3.AD/0.HA	GABA_neurons
ENSG00000091513	TF	1.32725	5.85147	6.0391e-07	0.000194986	3.AD/0.HA	GABA_neurons
ENSG00000154917	RAB6B	-0.466314	5.89412	0.0249756	0.234396	3.AD/0.HA	GABA_neurons
ENSG00000174579	MSL2	0.516654	5.5155	0.011398	0.152641	3.AD/0.HA	GABA_neurons
ENSG00000114113	RBP2	-1.89071	1.81248	0.00680502	0.113205	3.AD/0.HA	GABA_neurons
ENSG00000114120	SLC25A36	-0.474269	6.56292	0.0164527	0.185822	3.AD/0.HA	GABA_neurons
ENSG00000287155	AC022215.2	-2.55681	0.813179	0.0182519	0.196191	3.AD/0.HA	GABA_neurons
ENSG00000181804	SLC9A9	0.492274	6.87474	0.0273823	0.244953	3.AD/0.HA	GABA_neurons
ENSG00000243415	AC107021.1	-2.71935	1.57703	0.0192165	0.202583	3.AD/0.HA	GABA_neurons
ENSG00000152977	ZIC1	1.32687	2.60251	0.00063667	0.0260612	3.AD/0.HA	GABA_neurons
ENSG00000206199	ANKUB1	-0.970697	5.01198	2.27377e-05	0.00277322	3.AD/0.HA	GABA_neurons
ENSG00000070087	PFN2	-0.973313	4.40631	0.00458116	0.0887414	3.AD/0.HA	GABA_neurons
ENSG00000287706	AC092924.2	2.10059	2.74811	2.07376e-05	0.00264268	3.AD/0.HA	GABA_neurons
ENSG00000174948	GPR149	0.865918	5.49021	3.63158e-05	0.00393492	3.AD/0.HA	GABA_neurons
ENSG00000213186	TRIM59	1.84592	3.26853	4.27574e-05	0.00448886	3.AD/0.HA	GABA_neurons
ENSG00000169255	B3GALNT1	-0.729764	4.69501	0.0042393	0.0850463	3.AD/0.HA	GABA_neurons
ENSG00000287319	AC079822.1	-1.71263	2.25696	0.0101914	0.142708	3.AD/0.HA	GABA_neurons
ENSG00000008952	SEC62	-0.709632	6.62131	0.000519209	0.0231213	3.AD/0.HA	GABA_neurons
ENSG00000285051	SLC7A14-AS1	1.27578	6.05721	0.00163324	0.0470736	3.AD/0.HA	GABA_neurons
ENSG00000286856	AC061708.1	1.43007	2.76683	0.000205849	0.01234	3.AD/0.HA	GABA_neurons
ENSG00000154310	TNIK	0.705495	8.49321	0.000759471	0.02898	3.AD/0.HA	GABA_neurons
ENSG00000075651	PLD1	1.26318	4.98708	1.68288e-08	1.42078e-05	3.AD/0.HA	GABA_neurons
ENSG00000197584	KCNMB2	0.522078	10.3409	0.0157609	0.180934	3.AD/0.HA	GABA_neurons
ENSG00000237978	KCNMB2-AS1	-0.680534	7.44201	0.00449096	0.0878091	3.AD/0.HA	GABA_neurons
ENSG00000172667	ZMAT3	0.427888	5.68312	0.0217226	0.217892	3.AD/0.HA	GABA_neurons
ENSG00000136521	NDUFB5	-0.767284	4.4272	0.015796	0.181234	3.AD/0.HA	GABA_neurons
ENSG00000114757	PEX5L	0.533163	8.94129	0.00804973	0.125272	3.AD/0.HA	GABA_neurons
ENSG00000287645	AC092939.1	-0.97191	3.45542	0.0170089	0.189152	3.AD/0.HA	GABA_neurons
ENSG00000205981	DNAJC19	-0.829974	4.35219	0.00969928	0.139735	3.AD/0.HA	GABA_neurons
ENSG00000239381	AC125613.1	-0.945598	4.98275	0.000475116	0.0216332	3.AD/0.HA	GABA_neurons
ENSG00000043093	DCUN1D1	0.482646	5.64129	0.0171062	0.189801	3.AD/0.HA	GABA_neurons
ENSG00000176597	B3GNT5	-0.9109	3.55144	0.0128251	0.163436	3.AD/0.HA	GABA_neurons
ENSG00000161203	AP2M1	-0.908655	4.77006	0.0173253	0.19086	3.AD/0.HA	GABA_neurons
ENSG00000090539	CHRD	-1.30722	2.9163	0.0055947	0.0999645	3.AD/0.HA	GABA_neurons
ENSG00000187068	C3orf70	0.556516	5.37556	0.00832718	0.127532	3.AD/0.HA	GABA_neurons
ENSG00000156976	EIF4A2	-1.01322	6.25532	0.00779619	0.12304	3.AD/0.HA	GABA_neurons
ENSG00000157005	SST	-1.81651	5.21172	0.000963041	0.0339359	3.AD/0.HA	GABA_neurons
ENSG00000223812	AC073365.1	-2.96627	3.51519	0.0220185	0.219293	3.AD/0.HA	GABA_neurons
ENSG00000231383	FGF12-AS1	-0.98103	4.28775	0.0048152	0.0910127	3.AD/0.HA	GABA_neurons
ENSG00000114315	HES1	-2.63689	1.47735	0.0101186	0.142045	3.AD/0.HA	GABA_neurons
ENSG00000237222	LINC01968	2.33585	0.273028	0.0242276	0.230645	3.AD/0.HA	GABA_neurons
ENSG00000229178	AC233280.1	-1.83981	1.97272	0.00357905	0.0764965	3.AD/0.HA	GABA_neurons
ENSG00000223783	LINC01983	2.00827	1.27209	0.0107409	0.147796	3.AD/0.HA	GABA_neurons
ENSG00000287286	AC024560.5	-1.66945	1.67766	0.0254688	0.235962	3.AD/0.HA	GABA_neurons
ENSG00000182899	RPL35A	-1.56895	5.19212	4.63834e-06	0.000824405	3.AD/0.HA	GABA_neurons
ENSG00000281016	AC092574.2	-1.22	3.14544	0.00359474	0.076751	3.AD/0.HA	GABA_neurons
ENSG00000174227	PIGG	-0.964957	4.21435	0.00675587	0.11285	3.AD/0.HA	GABA_neurons
ENSG00000169020	ATP5ME	-1.02636	4.30633	0.0274954	0.245199	3.AD/0.HA	GABA_neurons
ENSG00000168824	NSG1	-1.29963	3.99643	7.73151e-05	0.00650024	3.AD/0.HA	GABA_neurons
ENSG00000179010	MRFAP1	-1.01417	4.1466	0.00297878	0.068122	3.AD/0.HA	GABA_neurons
ENSG00000178988	MRFAP1L1	-1.10604	3.11745	0.00408798	0.0834145	3.AD/0.HA	GABA_neurons
ENSG00000163145	C1QTNF7	-1.27256	3.2552	0.00997159	0.141269	3.AD/0.HA	GABA_neurons
ENSG00000237765	FAM200B	-0.832152	4.53392	0.00120943	0.0391461	3.AD/0.HA	GABA_neurons
ENSG00000004468	CD38	1.40852	1.8282	0.015161	0.177827	3.AD/0.HA	GABA_neurons
ENSG00000007062	PROM1	-1.1204	3.50655	0.024858	0.234049	3.AD/0.HA	GABA_neurons
ENSG00000248343	AC096576.2	-1.77832	3.46267	0.000797854	0.0297171	3.AD/0.HA	GABA_neurons
ENSG00000169851	PCDH7	0.639757	9.50765	0.00734431	0.118197	3.AD/0.HA	GABA_neurons
ENSG00000047365	ARAP2	1.05834	6.71286	0.000102381	0.00774044	3.AD/0.HA	GABA_neurons
ENSG00000231160	KLF3-AS1	0.532874	6.23931	0.0176054	0.192446	3.AD/0.HA	GABA_neurons
ENSG00000174123	TLR10	2.23175	0.37791	0.0268275	0.242344	3.AD/0.HA	GABA_neurons
ENSG00000249207	AC079921.1	-0.830576	3.70613	0.0200052	0.207231	3.AD/0.HA	GABA_neurons
ENSG00000163682	RPL9	-1.28535	5.44565	0.00101635	0.0348449	3.AD/0.HA	GABA_neurons
ENSG00000154277	UCHL1	-1.11041	6.74794	1.99929e-06	0.000430954	3.AD/0.HA	GABA_neurons
ENSG00000064042	LIMCH1	0.429613	9.10405	0.025172	0.235473	3.AD/0.HA	GABA_neurons
ENSG00000282917	AC107068.2	-1.67564	3.68727	3.16419e-05	0.00348439	3.AD/0.HA	GABA_neurons
ENSG00000075539	FRYL	0.446137	8.18876	0.00991615	0.140802	3.AD/0.HA	GABA_neurons
ENSG00000248256	OCIAD1-AS1	-2.80342	1.53455	0.00198137	0.0529637	3.AD/0.HA	GABA_neurons
ENSG00000145247	OCIAD2	-0.981973	3.07771	0.0172176	0.19041	3.AD/0.HA	GABA_neurons
ENSG00000250302	LINC01618	-1.35386	2.55465	0.00836434	0.127908	3.AD/0.HA	GABA_neurons
ENSG00000226950	DANCR	-1.33324	3.03074	0.0083971	0.128119	3.AD/0.HA	GABA_neurons
ENSG00000250930	LNX1-AS1	-1.15878	3.20286	0.00337807	0.0738366	3.AD/0.HA	GABA_neurons
ENSG00000249700	SRD5A3-AS1	-1.56613	1.96041	0.0104472	0.145186	3.AD/0.HA	GABA_neurons
ENSG00000171476	HOPX	-1.27415	3.18394	0.00897925	0.134095	3.AD/0.HA	GABA_neurons
ENSG00000250125	LINC02232	-1.27246	4.56914	0.00478098	0.0906924	3.AD/0.HA	GABA_neurons
ENSG00000109163	GNRHR	-1.64617	1.97275	0.0199861	0.207209	3.AD/0.HA	GABA_neurons
ENSG00000080493	SLC4A4	0.780141	6.91022	0.00537434	0.0970543	3.AD/0.HA	GABA_neurons
ENSG00000169116	PARM1	0.536698	5.96614	0.0237503	0.228071	3.AD/0.HA	GABA_neurons
ENSG00000138769	CDKL2	-0.48621	5.95638	0.0124369	0.160405	3.AD/0.HA	GABA_neurons
ENSG00000138764	CCNG2	0.734821	4.64467	0.00839302	0.128119	3.AD/0.HA	GABA_neurons
ENSG00000249307	LINC01088	1.27882	4.82797	2.36516e-06	0.000489009	3.AD/0.HA	GABA_neurons
ENSG00000197826	CFAP299	-1.02197	3.5282	0.0270102	0.24302	3.AD/0.HA	GABA_neurons
ENSG00000180769	WDFY3-AS2	1.0515	3.02198	0.00372112	0.0785388	3.AD/0.HA	GABA_neurons
ENSG00000250062	AC104827.1	-1.43553	4.8412	3.9957e-06	0.000722865	3.AD/0.HA	GABA_neurons
ENSG00000284968	AC093827.4	1.67051	1.08629	0.00838587	0.128119	3.AD/0.HA	GABA_neurons
ENSG00000145337	PYURF	-0.931925	3.33951	0.01655	0.186432	3.AD/0.HA	GABA_neurons
ENSG00000177432	NAP1L5	-0.670541	4.71322	0.0125264	0.160741	3.AD/0.HA	GABA_neurons
ENSG00000185477	GPRIN3	0.735977	5.76511	0.000973209	0.0340837	3.AD/0.HA	GABA_neurons
ENSG00000163110	PDLIM5	1.06408	5.67106	1.0491e-05	0.00157459	3.AD/0.HA	GABA_neurons
ENSG00000163116	STPG2	0.49149	5.38757	0.0259547	0.238069	3.AD/0.HA	GABA_neurons
ENSG00000251523	AC108159.1	-2.39737	1.27308	0.0124676	0.160494	3.AD/0.HA	GABA_neurons
ENSG00000197894	ADH5	-0.965361	3.84338	0.00281172	0.0660878	3.AD/0.HA	GABA_neurons
ENSG00000164032	H2AFZ	-1.98051	3.74153	0.00209985	0.0544778	3.AD/0.HA	GABA_neurons
ENSG00000286242	AC018797.3	-1.30575	2.89144	0.0129353	0.16381	3.AD/0.HA	GABA_neurons
ENSG00000145354	CISD2	-0.720676	4.27789	0.013373	0.16775	3.AD/0.HA	GABA_neurons
ENSG00000138780	GSTCD	-0.587034	5.03997	0.0124524	0.160494	3.AD/0.HA	GABA_neurons
ENSG00000168743	NPNT	-1.21023	4.05064	0.000629679	0.0259848	3.AD/0.HA	GABA_neurons
ENSG00000109475	RPL34	-1.23829	5.83198	0.00190251	0.0516045	3.AD/0.HA	GABA_neurons
ENSG00000170522	ELOVL6	0.425587	6.78163	0.016034	0.182928	3.AD/0.HA	GABA_neurons
ENSG00000248152	AC093879.1	-1.1034	5.46976	3.245e-06	0.000626193	3.AD/0.HA	GABA_neurons
ENSG00000145349	CAMK2D	0.43468	8.28654	0.0194098	0.203466	3.AD/0.HA	GABA_neurons
ENSG00000174607	UGT8	2.15305	5.10939	6.60186e-12	4.45889e-08	3.AD/0.HA	GABA_neurons
ENSG00000269893	SNHG8	-1.11208	2.68361	0.0271735	0.24402	3.AD/0.HA	GABA_neurons
ENSG00000138735	PDE5A	-0.905572	6.14004	2.66958e-05	0.00310868	3.AD/0.HA	GABA_neurons
ENSG00000109381	ELF2	0.506361	6.97939	0.00405111	0.0829836	3.AD/0.HA	GABA_neurons
ENSG00000196782	MAML3	1.14897	8.28071	0.000114059	0.00825378	3.AD/0.HA	GABA_neurons
ENSG00000153130	SCOC	-0.758147	5.27636	0.00457559	0.0887182	3.AD/0.HA	GABA_neurons
ENSG00000249806	AC139720.1	-1.65061	5.48384	1.07235e-06	0.000264975	3.AD/0.HA	GABA_neurons
ENSG00000109458	GAB1	1.39111	6.74646	8.42819e-05	0.00683088	3.AD/0.HA	GABA_neurons
ENSG00000170365	SMAD1	0.501728	5.61852	0.0221941	0.219525	3.AD/0.HA	GABA_neurons
ENSG00000151623	NR3C2	0.705501	8.72468	0.00143801	0.043191	3.AD/0.HA	GABA_neurons
ENSG00000287292	AC002460.2	0.769726	7.33673	0.00207599	0.0542336	3.AD/0.HA	GABA_neurons
ENSG00000145425	RPS3A	-1.59224	5.35309	3.94642e-06	0.000720382	3.AD/0.HA	GABA_neurons
ENSG00000121211	MND1	1.20499	2.57345	0.0153228	0.178533	3.AD/0.HA	GABA_neurons
ENSG00000250910	AC097467.3	-2.31672	2.66181	7.27374e-06	0.00119822	3.AD/0.HA	GABA_neurons
ENSG00000164124	TMEM144	1.19887	6.33929	0.000202547	0.0122508	3.AD/0.HA	GABA_neurons
ENSG00000286558	AC098679.5	1.95733	2.45714	6.69659e-05	0.00595079	3.AD/0.HA	GABA_neurons
ENSG00000171503	ETFDH	-0.442696	6.26457	0.0222715	0.219915	3.AD/0.HA	GABA_neurons
ENSG00000171497	PPID	-0.618242	4.55581	0.0230624	0.224528	3.AD/0.HA	GABA_neurons
ENSG00000145416	MARCH1	0.796014	8.74113	0.00401089	0.0827282	3.AD/0.HA	GABA_neurons
ENSG00000183439	TRIM61	-2.3205	1.21636	0.0118647	0.155525	3.AD/0.HA	GABA_neurons
ENSG00000052802	MSMO1	-0.849027	4.24898	0.00227832	0.0572338	3.AD/0.HA	GABA_neurons
ENSG00000181381	DDX60L	0.82298	3.32741	0.022366	0.220633	3.AD/0.HA	GABA_neurons
ENSG00000129116	PALLD	0.416916	6.91606	0.0247592	0.233336	3.AD/0.HA	GABA_neurons
ENSG00000056050	HPF1	-0.591873	4.47689	0.0245377	0.232568	3.AD/0.HA	GABA_neurons
ENSG00000198948	MFAP3L	0.857506	4.72174	0.000161641	0.0105311	3.AD/0.HA	GABA_neurons
ENSG00000174473	GALNTL6	0.981591	10.9811	0.000419166	0.0197515	3.AD/0.HA	GABA_neurons
ENSG00000245213	AC105285.1	0.745357	4.74033	0.00854591	0.129245	3.AD/0.HA	GABA_neurons
ENSG00000145451	GLRA3	-0.788557	5.26216	0.0135761	0.168945	3.AD/0.HA	GABA_neurons
ENSG00000249106	AC097537.1	-1.31334	3.36913	0.00131615	0.0409016	3.AD/0.HA	GABA_neurons
ENSG00000251504	LINC01099	-1.44968	2.69914	0.0178517	0.193581	3.AD/0.HA	GABA_neurons
ENSG00000287775	AC096747.1	-1.84165	2.42341	0.00335648	0.0736607	3.AD/0.HA	GABA_neurons
ENSG00000249883	AC104803.1	-1.71473	3.25086	4.55189e-05	0.0046347	3.AD/0.HA	GABA_neurons
ENSG00000248197	LINC00290	-1.01542	4.82549	0.000453966	0.0209527	3.AD/0.HA	GABA_neurons
ENSG00000251336	TEMN3-AS1	-2.53978	1.30592	0.00823819	0.126744	3.AD/0.HA	GABA_neurons
ENSG00000177822	TENM3-AS1	-1.31406	5.33378	5.11027e-07	0.000169745	3.AD/0.HA	GABA_neurons
ENSG00000248816	AC079226.2	-1.95269	1.35805	0.0104282	0.145087	3.AD/0.HA	GABA_neurons
ENSG00000164303	ENPP6	1.54846	2.11508	0.000758133	0.02898	3.AD/0.HA	GABA_neurons
ENSG00000168310	IRF2	0.528928	5.3612	0.010104	0.142045	3.AD/0.HA	GABA_neurons
ENSG00000151729	SLC25A4	-1.03956	4.49659	0.00754163	0.120417	3.AD/0.HA	GABA_neurons
ENSG00000245685	FRG1-DT	0.62321	5.03161	0.0243722	0.231619	3.AD/0.HA	GABA_neurons
ENSG00000164366	CCDC127	-1.10764	2.75614	0.0163299	0.185134	3.AD/0.HA	GABA_neurons
ENSG00000145494	NDUFS6	-0.992177	3.85925	0.0105197	0.145848	3.AD/0.HA	GABA_neurons
ENSG00000133398	MED10	-1.28303	3.9407	0.000393449	0.0188465	3.AD/0.HA	GABA_neurons
ENSG00000078295	ADCY2	0.41576	8.70064	0.0202011	0.208539	3.AD/0.HA	GABA_neurons
ENSG00000288002	AC091912.3	1.35007	2.83817	0.000241614	0.0136748	3.AD/0.HA	GABA_neurons
ENSG00000250198	LINC02199	2.17088	1.19419	0.000887875	0.0318974	3.AD/0.HA	GABA_neurons
ENSG00000112902	SEMA5A	0.700246	8.23186	0.00630224	0.10772	3.AD/0.HA	GABA_neurons
ENSG00000145569	OTULINL	0.887992	3.76564	0.0019011	0.0516045	3.AD/0.HA	GABA_neurons
ENSG00000183654	MARCH11	0.559956	6.57823	0.000950013	0.0335351	3.AD/0.HA	GABA_neurons
ENSG00000250981	AC016650.1	-1.63705	2.0236	0.0130092	0.164488	3.AD/0.HA	GABA_neurons
ENSG00000248874	C5orf17	-3.92303	4.85823	0.0152335	0.177959	3.AD/0.HA	GABA_neurons
ENSG00000286134	AC114930.1	-4.7691	2.31002	0.0177489	0.193141	3.AD/0.HA	GABA_neurons
ENSG00000251294	AC091885.2	-1.49523	4.1257	0.002333	0.0583596	3.AD/0.HA	GABA_neurons
ENSG00000286625	AC113370.1	2.07589	1.33884	0.00044099	0.0204939	3.AD/0.HA	GABA_neurons
ENSG00000113100	CDH9	-0.661672	8.669	0.00124884	0.0396613	3.AD/0.HA	GABA_neurons
ENSG00000113387	SUB1	-0.648497	5.80488	0.00480005	0.0908958	3.AD/0.HA	GABA_neurons
ENSG00000113389	NPR3	1.27541	3.86031	0.000215065	0.0126057	3.AD/0.HA	GABA_neurons
ENSG00000113456	RAD1	-1.0926	2.85269	0.0270012	0.24302	3.AD/0.HA	GABA_neurons
ENSG00000248461	LINC02119	-1.87117	2.08915	0.019362	0.203466	3.AD/0.HA	GABA_neurons
ENSG00000113594	LIFR	0.582542	6.19171	0.00151695	0.0446751	3.AD/0.HA	GABA_neurons
ENSG00000132356	PRKAA1	-0.533677	5.18714	0.0180307	0.194745	3.AD/0.HA	GABA_neurons
ENSG00000145592	RPL37	-0.930231	5.80194	0.00026974	0.0144208	3.AD/0.HA	GABA_neurons
ENSG00000250722	SELENOP	1.70416	4.0431	0.00618704	0.1066	3.AD/0.HA	GABA_neurons
ENSG00000112972	HMGCS1	-0.574295	5.39235	0.00757684	0.120788	3.AD/0.HA	GABA_neurons
ENSG00000172244	C5orf34	-1.41333	2.25261	0.0178562	0.193581	3.AD/0.HA	GABA_neurons
ENSG00000164171	ITGA2	1.83132	3.73369	1.59147e-08	1.42078e-05	3.AD/0.HA	GABA_neurons
ENSG00000134363	FST	-5.32642	0.972559	0.0050062	0.0928047	3.AD/0.HA	GABA_neurons
ENSG00000178996	SNX18	0.796075	3.61597	0.0102747	0.143576	3.AD/0.HA	GABA_neurons
ENSG00000251307	AC026704.1	-1.67035	2.92042	0.000521458	0.0231706	3.AD/0.HA	GABA_neurons
ENSG00000095015	MAP3K1	0.511037	5.52385	0.0120105	0.1566	3.AD/0.HA	GABA_neurons
ENSG00000250961	AC025470.2	1.28262	2.03132	0.0197459	0.205914	3.AD/0.HA	GABA_neurons
ENSG00000248475	AC016642.1	-0.997531	3.72007	0.00767531	0.121633	3.AD/0.HA	GABA_neurons
ENSG00000164181	ELOVL7	0.653285	4.61464	0.0120758	0.15725	3.AD/0.HA	GABA_neurons
ENSG00000130449	ZSWIM6	0.392293	7.98855	0.0246778	0.233029	3.AD/0.HA	GABA_neurons
ENSG00000178722	C5orf64	1.48596	3.51127	7.23309e-05	0.00618384	3.AD/0.HA	GABA_neurons
ENSG00000186479	RGS7BP	0.409287	6.88204	0.0252978	0.235886	3.AD/0.HA	GABA_neurons
ENSG00000049192	ADAMTS6	0.486791	6.33457	0.020707	0.211261	3.AD/0.HA	GABA_neurons
ENSG00000112851	ERBIN	0.62722	8.07473	0.0014515	0.0433142	3.AD/0.HA	GABA_neurons
ENSG00000285999	AC025442.2	0.918281	3.50619	0.011048	0.150286	3.AD/0.HA	GABA_neurons
ENSG00000134056	MRPS36	-0.689739	3.91921	0.0282867	0.248345	3.AD/0.HA	GABA_neurons
ENSG00000085231	AK6	-0.71746	3.63948	0.0217622	0.217892	3.AD/0.HA	GABA_neurons
ENSG00000273841	TAF9	-1.40392	2.95795	0.00975969	0.139951	3.AD/0.HA	GABA_neurons
ENSG00000152939	MARVELD2	1.54532	0.794058	0.0259033	0.237802	3.AD/0.HA	GABA_neurons
ENSG00000131844	MCCC2	-0.528314	4.80558	0.0238047	0.228259	3.AD/0.HA	GABA_neurons
ENSG00000145741	BTF3	-1.13543	4.23927	0.000610169	0.0253974	3.AD/0.HA	GABA_neurons
ENSG00000171617	ENC1	-0.745746	4.66136	0.00908491	0.135062	3.AD/0.HA	GABA_neurons
ENSG00000145703	IQGAP2	0.829013	5.01888	0.00118316	0.0387916	3.AD/0.HA	GABA_neurons
ENSG00000250802	ZBED3-AS1	0.575815	4.84937	0.0166064	0.186696	3.AD/0.HA	GABA_neurons
ENSG00000145685	LHFPL2	0.934858	5.61437	0.00516133	0.0945559	3.AD/0.HA	GABA_neurons
ENSG00000249042	AC008771.1	-0.76686	4.6877	0.0116217	0.154008	3.AD/0.HA	GABA_neurons
ENSG00000186468	RPS23	-1.32553	5.54406	0.000148995	0.00996347	3.AD/0.HA	GABA_neurons
ENSG00000164176	EDIL3	0.669419	8.48522	0.00460465	0.0890261	3.AD/0.HA	GABA_neurons
ENSG00000127184	COX7C	-1.60224	5.47707	0.000363542	0.0178547	3.AD/0.HA	GABA_neurons
ENSG00000134480	CCNH	1.09118	9.81629	0.000100808	0.00768002	3.AD/0.HA	GABA_neurons
ENSG00000245864	MEF2C-AS2	-0.618242	5.22811	0.0158258	0.181473	3.AD/0.HA	GABA_neurons
ENSG00000286577	AC117528.1	-2.015	1.87563	0.00822603	0.126744	3.AD/0.HA	GABA_neurons
ENSG00000246763	RGMB-AS1	-2.39485	1.24405	0.020349	0.209068	3.AD/0.HA	GABA_neurons
ENSG00000279232	AC008522.1	-2.08576	1.92035	0.00573434	0.101831	3.AD/0.HA	GABA_neurons
ENSG00000174132	FAM174A	-1.01437	5.09209	7.00278e-05	0.00601634	3.AD/0.HA	GABA_neurons
ENSG00000112893	MAN2A1	0.883514	7.737	0.00175724	0.0495204	3.AD/0.HA	GABA_neurons
ENSG00000152495	CAMK4	0.680641	8.08729	0.00143851	0.043191	3.AD/0.HA	GABA_neurons
ENSG00000250095	NREP-AS1	-4.43423	0.602303	0.0206474	0.21076	3.AD/0.HA	GABA_neurons
ENSG00000224032	EPB41L4A-AS1	-1.0386	3.46913	0.0123985	0.160011	3.AD/0.HA	GABA_neurons
ENSG00000129625	REEP5	-0.554935	5.94129	0.0239405	0.228759	3.AD/0.HA	GABA_neurons
ENSG00000129596	CDO1	-0.750546	4.2136	0.0128953	0.163713	3.AD/0.HA	GABA_neurons
ENSG00000251293	AC008574.1	-2.31885	3.49143	0.000354598	0.0175669	3.AD/0.HA	GABA_neurons
ENSG00000113083	LOX	1.93122	1.31322	0.00309372	0.0700717	3.AD/0.HA	GABA_neurons
ENSG00000145794	MEGF10	0.965888	4.67428	0.00219461	0.0559335	3.AD/0.HA	GABA_neurons
ENSG00000230561	CCDC192	-1.83056	3.11458	6.23178e-05	0.0057135	3.AD/0.HA	GABA_neurons
ENSG00000113396	SLC27A6	0.483567	5.62759	0.0202274	0.208681	3.AD/0.HA	GABA_neurons
ENSG00000169567	HINT1	-1.73733	5.07473	0.000368044	0.0179694	3.AD/0.HA	GABA_neurons
ENSG00000234758	AC034228.3	-1.78441	1.25253	0.0231956	0.225415	3.AD/0.HA	GABA_neurons
ENSG00000197208	SLC22A4	-0.740079	3.50622	0.0240686	0.229604	3.AD/0.HA	GABA_neurons
ENSG00000230612	AC004039.1	-1.98933	4.02017	7.33879e-07	0.000221938	3.AD/0.HA	GABA_neurons
ENSG00000164405	UQCRQ	-1.8875	3.78326	1.60449e-07	7.7405e-05	3.AD/0.HA	GABA_neurons
ENSG00000113558	SKP1	-0.669179	5.86241	0.00292324	0.0673076	3.AD/0.HA	GABA_neurons
ENSG00000152700	SAR1B	-0.545333	4.96104	0.0160765	0.183187	3.AD/0.HA	GABA_neurons
ENSG00000164615	CAMLG	-0.599429	5.08474	0.0107617	0.147832	3.AD/0.HA	GABA_neurons
ENSG00000145824	CXCL14	-1.45774	7.9493	0.00612765	0.105757	3.AD/0.HA	GABA_neurons
ENSG00000145832	SLC25A48	0.596141	6.04858	0.014803	0.176227	3.AD/0.HA	GABA_neurons
ENSG00000145826	LECT2	-2.50782	1.30542	0.01674	0.187454	3.AD/0.HA	GABA_neurons
ENSG00000069018	TRPC7	0.83594	3.03678	0.026774	0.242077	3.AD/0.HA	GABA_neurons
ENSG00000249593	AC011405.1	-1.10755	2.2739	0.0258823	0.237727	3.AD/0.HA	GABA_neurons
ENSG00000120306	CYSTM1	-0.714753	3.96324	0.025829	0.237454	3.AD/0.HA	GABA_neurons
ENSG00000256453	DND1	-3.99119	0.354219	0.0281956	0.24796	3.AD/0.HA	GABA_neurons
ENSG00000255408	PCDHA3	-5.0841	0.883259	0.00144098	0.043191	3.AD/0.HA	GABA_neurons
ENSG00000272154	AC244517.2	-1.64232	2.15146	0.02555	0.236067	3.AD/0.HA	GABA_neurons
ENSG00000280029	AC244517.11	-1.65087	3.00516	0.000387183	0.0186356	3.AD/0.HA	GABA_neurons
ENSG00000288095	AC005618.4	-4.75824	0.71031	0.00768301	0.121633	3.AD/0.HA	GABA_neurons
ENSG00000204956	PCDHGA1	0.894987	3.35344	0.0260548	0.238557	3.AD/0.HA	GABA_neurons
ENSG00000286736	AC005753.2	-1.38526	3.47881	0.0115499	0.153459	3.AD/0.HA	GABA_neurons
ENSG00000113555	PCDH12	-2.65603	0.888653	0.0181206	0.195401	3.AD/0.HA	GABA_neurons
ENSG00000131507	NDFIP1	-0.559854	7.35666	0.00227678	0.0572338	3.AD/0.HA	GABA_neurons
ENSG00000113580	NR3C1	0.609639	7.15807	0.00166785	0.0475303	3.AD/0.HA	GABA_neurons
ENSG00000285605	AC109441.1	-2.68995	3.31117	1.90968e-07	8.42843e-05	3.AD/0.HA	GABA_neurons
ENSG00000204928	GRXCR2	-1.90888	2.03418	0.00402528	0.0828717	3.AD/0.HA	GABA_neurons
ENSG00000156463	SH3RF2	-1.90159	1.85745	0.00799216	0.125048	3.AD/0.HA	GABA_neurons
ENSG00000280780	JAKMIP2-AS1	-0.953269	3.69632	0.00656374	0.110736	3.AD/0.HA	GABA_neurons
ENSG00000176049	JAKMIP2	0.432158	8.34732	0.0199795	0.207209	3.AD/0.HA	GABA_neurons
ENSG00000169247	SH3TC2	2.64755	3.4101	5.35085e-11	1.54884e-07	3.AD/0.HA	GABA_neurons
ENSG00000250072	SH3TC2-DT	2.32925	2.5126	0.000235481	0.0134783	3.AD/0.HA	GABA_neurons
ENSG00000248647	AC012613.1	-2.00956	1.88887	0.00757323	0.120788	3.AD/0.HA	GABA_neurons
ENSG00000182578	CSF1R	2.17716	2.01859	6.80316e-05	0.00595079	3.AD/0.HA	GABA_neurons
ENSG00000011083	SLC6A7	-1.19306	2.81372	0.0222628	0.219915	3.AD/0.HA	GABA_neurons
ENSG00000164587	RPS14	-1.33871	5.44128	0.00286452	0.0665911	3.AD/0.HA	GABA_neurons
ENSG00000254333	NDST1-AS1	-1.92505	1.33692	0.0129065	0.163739	3.AD/0.HA	GABA_neurons
ENSG00000113140	SPARC	-0.902844	3.34014	0.00959729	0.139	3.AD/0.HA	GABA_neurons
ENSG00000177556	ATOX1	-0.866065	3.91422	0.0232489	0.225716	3.AD/0.HA	GABA_neurons
ENSG00000145888	GLRA1	1.15649	2.77759	0.00133146	0.0411251	3.AD/0.HA	GABA_neurons
ENSG00000286749	AC008571.2	1.13133	6.0739	0.000165732	0.010763	3.AD/0.HA	GABA_neurons
ENSG00000170271	FAXDC2	1.14339	3.37655	0.00205755	0.0540016	3.AD/0.HA	GABA_neurons
ENSG00000170624	SGCD	0.977281	9.83761	9.67301e-05	0.00750937	3.AD/0.HA	GABA_neurons
ENSG00000253653	AC009185.1	-2.20609	1.09854	0.0279016	0.246532	3.AD/0.HA	GABA_neurons
ENSG00000170214	ADRA1B	0.82652	5.60011	0.0122693	0.159257	3.AD/0.HA	GABA_neurons
ENSG00000170234	PWWP2A	0.480863	6.28141	0.0189534	0.201238	3.AD/0.HA	GABA_neurons
ENSG00000118322	ATP10B	1.02397	4.24065	0.0167973	0.187524	3.AD/0.HA	GABA_neurons
ENSG00000170584	NUDCD2	-1.02597	3.54925	0.00525836	0.0958262	3.AD/0.HA	GABA_neurons
ENSG00000254187	AC008708.2	-1.97712	2.79413	6.28562e-05	0.00573651	3.AD/0.HA	GABA_neurons
ENSG00000253925	AC011369.1	-1.43429	2.78799	0.00505898	0.0934412	3.AD/0.HA	GABA_neurons
ENSG00000204767	INSYN2B	0.923759	5.1133	0.000231563	0.0133293	3.AD/0.HA	GABA_neurons
ENSG00000043462	LCP2	0.871486	2.88691	0.0192894	0.203035	3.AD/0.HA	GABA_neurons
ENSG00000182132	KCNIP1	0.829003	8.7139	7.92684e-05	0.00658253	3.AD/0.HA	GABA_neurons
ENSG00000204764	RANBP17	0.501142	7.29328	0.0276748	0.246049	3.AD/0.HA	GABA_neurons
ENSG00000174705	SH3PXD2B	0.754509	4.82135	0.00117027	0.0385561	3.AD/0.HA	GABA_neurons
ENSG00000113719	ERGIC1	0.477014	5.86298	0.0126568	0.162004	3.AD/0.HA	GABA_neurons
ENSG00000248469	AC139491.1	-4.02438	0.359344	0.0246266	0.232843	3.AD/0.HA	GABA_neurons
ENSG00000251458	AC139491.4	-1.70116	1.47114	0.0251564	0.235436	3.AD/0.HA	GABA_neurons
ENSG00000074317	SNCB	-0.970973	4.71588	9.91586e-05	0.00763936	3.AD/0.HA	GABA_neurons
ENSG00000196923	PDLIM7	-1.5767	2.25958	0.00454058	0.0882084	3.AD/0.HA	GABA_neurons
ENSG00000146067	FAM193B	0.435456	5.49698	0.0205876	0.210467	3.AD/0.HA	GABA_neurons
ENSG00000177932	ZNF354C	1.70461	1.81693	0.000727181	0.0284242	3.AD/0.HA	GABA_neurons
ENSG00000113269	RNF130	0.531969	8.02793	0.00489105	0.0915919	3.AD/0.HA	GABA_neurons
ENSG00000204628	RACK1	-1.32786	4.66938	9.40655e-07	0.000247527	3.AD/0.HA	GABA_neurons
ENSG00000137267	TUBB2A	-1.6735	5.07233	2.68899e-05	0.00311338	3.AD/0.HA	GABA_neurons
ENSG00000137285	TUBB2B	-0.874708	3.48072	0.0100241	0.141351	3.AD/0.HA	GABA_neurons
ENSG00000137266	SLC22A23	0.712124	6.91005	6.78739e-05	0.00595079	3.AD/0.HA	GABA_neurons
ENSG00000228793	AL033523.1	2.31639	5.10514	2.06063e-07	8.8835e-05	3.AD/0.HA	GABA_neurons
ENSG00000145975	FAM217A	-2.59811	1.77852	0.000730433	0.0284242	3.AD/0.HA	GABA_neurons
ENSG00000285424	AL162718.1	-2.33458	1.22198	0.00589602	0.103617	3.AD/0.HA	GABA_neurons
ENSG00000214113	LYRM4	0.48484	6.11567	0.0128137	0.163436	3.AD/0.HA	GABA_neurons
ENSG00000124785	NRN1	-2.06662	2.84396	0.00873399	0.131477	3.AD/0.HA	GABA_neurons
ENSG00000238221	AL139095.4	-1.72533	1.72964	0.0249476	0.234348	3.AD/0.HA	GABA_neurons
ENSG00000111837	MAK	-0.970414	4.41627	0.000978348	0.0340837	3.AD/0.HA	GABA_neurons
ENSG00000112137	PHACTR1	0.487932	9.92494	0.0286873	0.249974	3.AD/0.HA	GABA_neurons
ENSG00000137414	FAM8A1	-0.632431	4.29209	0.0239386	0.228759	3.AD/0.HA	GABA_neurons
ENSG00000137177	KIF13A	0.66592	6.27156	0.00124726	0.0396613	3.AD/0.HA	GABA_neurons
ENSG00000233848	AL513188.1	-2.43634	1.9773	0.000238227	0.0135589	3.AD/0.HA	GABA_neurons
ENSG00000197061	HIST1H4C	-0.876057	4.23695	0.0267002	0.24195	3.AD/0.HA	GABA_neurons
ENSG00000204655	MOG	1.64474	3.74435	4.80928e-06	0.000847353	3.AD/0.HA	GABA_neurons
ENSG00000206503	HLA-A	-1.80831	3.60586	1.84372e-05	0.00242581	3.AD/0.HA	GABA_neurons
ENSG00000137331	IER3	-3.13951	1.21387	0.0114609	0.152994	3.AD/0.HA	GABA_neurons
ENSG00000272501	AL662844.4	-1.9782	1.67696	0.0125075	0.1606	3.AD/0.HA	GABA_neurons
ENSG00000204525	HLA-C	-1.97513	2.80114	0.00121942	0.0392814	3.AD/0.HA	GABA_neurons
ENSG00000204387	SNHG32	-1.15417	3.00437	0.0124616	0.160494	3.AD/0.HA	GABA_neurons
ENSG00000213676	ATF6B	-0.934918	3.62035	0.00349736	0.0754671	3.AD/0.HA	GABA_neurons
ENSG00000221988	PPT2	0.824961	2.63563	0.0279021	0.246532	3.AD/0.HA	GABA_neurons
ENSG00000204296	TSBP1	-1.54168	3.0858	0.00184465	0.0507829	3.AD/0.HA	GABA_neurons
ENSG00000230313	HCG24	1.57045	1.67541	0.00323196	0.071858	3.AD/0.HA	GABA_neurons
ENSG00000112473	SLC39A7	-1.85333	2.16049	0.00190782	0.0516795	3.AD/0.HA	GABA_neurons
ENSG00000204227	RING1	-0.786536	4.03462	0.00739603	0.118747	3.AD/0.HA	GABA_neurons
ENSG00000231500	RPS18	-1.63233	5.23692	0.000634288	0.0260612	3.AD/0.HA	GABA_neurons
ENSG00000204220	PFDN6	-1.38455	2.53134	0.0173593	0.190953	3.AD/0.HA	GABA_neurons
ENSG00000112514	CUTA	-1.7404	3.46402	0.000299134	0.0155479	3.AD/0.HA	GABA_neurons
ENSG00000137309	HMGA1	-1.4275	2.28116	0.00880594	0.132167	3.AD/0.HA	GABA_neurons
ENSG00000186577	SMIM29	-1.76475	3.44409	8.72107e-05	0.00698444	3.AD/0.HA	GABA_neurons
ENSG00000124614	RPS10	-1.43226	3.34082	0.00136212	0.0418169	3.AD/0.HA	GABA_neurons
ENSG00000198755	RPL10A	-1.42906	4.59483	1.19844e-05	0.00171611	3.AD/0.HA	GABA_neurons
ENSG00000096060	FKBP5	2.06412	6.06007	3.09465e-13	6.27038e-09	3.AD/0.HA	GABA_neurons
ENSG00000156711	MAPK13	-0.906941	2.84839	0.0274546	0.245199	3.AD/0.HA	GABA_neurons
ENSG00000124772	CPNE5	-1.02001	4.79249	0.000533525	0.0232899	3.AD/0.HA	GABA_neurons
ENSG00000137409	MTCH1	-0.811815	5.07735	0.00711344	0.115955	3.AD/0.HA	GABA_neurons
ENSG00000112167	SAYSD1	-1.3342	2.50148	0.0109363	0.14948	3.AD/0.HA	GABA_neurons
ENSG00000164627	KIF6	1.13937	5.39151	0.017492	0.191685	3.AD/0.HA	GABA_neurons
ENSG00000146122	DAAM2	1.46765	4.7861	7.58418e-07	0.000225986	3.AD/0.HA	GABA_neurons
ENSG00000156564	LRFN2	0.696315	6.53179	0.00535215	0.0968262	3.AD/0.HA	GABA_neurons
ENSG00000112561	TFEB	1.262	2.78528	0.00554299	0.0993034	3.AD/0.HA	GABA_neurons
ENSG00000214736	TOMM6	-0.971117	3.40309	0.00715479	0.116349	3.AD/0.HA	GABA_neurons
ENSG00000137161	CNPY3	-1.16453	3.04976	0.00333398	0.0734272	3.AD/0.HA	GABA_neurons
ENSG00000124733	MEA1	-1.43435	2.38988	0.00475614	0.0906924	3.AD/0.HA	GABA_neurons
ENSG00000146215	CRIP3	-2.6119	0.860648	0.0182199	0.196175	3.AD/0.HA	GABA_neurons
ENSG00000137207	YIPF3	-1.28745	3.00171	0.0016221	0.0468192	3.AD/0.HA	GABA_neurons
ENSG00000124571	XPO5	0.535658	4.80938	0.0164099	0.185546	3.AD/0.HA	GABA_neurons
ENSG00000096384	HSP90AB1	-0.865618	7.40354	0.00176703	0.0495511	3.AD/0.HA	GABA_neurons
ENSG00000178233	TMEM151B	-0.647379	4.37735	0.0264349	0.240513	3.AD/0.HA	GABA_neurons
ENSG00000286417	AL133334.1	-1.13651	2.46883	0.0244897	0.232308	3.AD/0.HA	GABA_neurons
ENSG00000146233	CYP39A1	2.66913	2.21264	3.00406e-05	0.00338157	3.AD/0.HA	GABA_neurons
ENSG00000146070	PLA2G7	1.50974	1.55153	0.0089568	0.133936	3.AD/0.HA	GABA_neurons
ENSG00000124818	OPN5	-2.49736	1.70791	0.00268264	0.0641924	3.AD/0.HA	GABA_neurons
ENSG00000146085	MMUT	-0.608949	4.32264	0.018323	0.196642	3.AD/0.HA	GABA_neurons
ENSG00000096092	TMEM14A	-1.39265	4.99269	1.40101e-05	0.00195774	3.AD/0.HA	GABA_neurons
ENSG00000146147	MLIP	-2.64648	4.39634	0.00603009	0.104697	3.AD/0.HA	GABA_neurons
ENSG00000226803	ZNF451-AS1	-1.31554	3.8011	0.000319122	0.0162873	3.AD/0.HA	GABA_neurons
ENSG00000230910	AL391807.1	-0.701705	5.50211	0.00083166	0.0304721	3.AD/0.HA	GABA_neurons
ENSG00000135298	ADGRB3	0.396656	11.6231	0.0256344	0.236502	3.AD/0.HA	GABA_neurons
ENSG00000232295	AL589935.1	1.03869	5.35704	5.81021e-05	0.00547565	3.AD/0.HA	GABA_neurons
ENSG00000233237	LINC00472	0.753975	7.68371	0.012348	0.159758	3.AD/0.HA	GABA_neurons
ENSG00000185760	KCNQ5	0.829524	10.4397	0.000417159	0.0197136	3.AD/0.HA	GABA_neurons
ENSG00000135297	MTO1	0.568486	4.55803	0.0179094	0.193847	3.AD/0.HA	GABA_neurons
ENSG00000156508	EEF1A1	-0.805047	6.92185	0.00146726	0.0435918	3.AD/0.HA	GABA_neurons
ENSG00000231652	AL590428.1	-4.70711	0.750195	0.0130878	0.164919	3.AD/0.HA	GABA_neurons
ENSG00000112695	COX7A2	-1.3466	4.69405	0.000200304	0.0121878	3.AD/0.HA	GABA_neurons
ENSG00000112697	TMEM30A	-0.515038	5.5246	0.0222923	0.220013	3.AD/0.HA	GABA_neurons
ENSG00000287811	AL391840.3	-1.17706	4.0337	4.6005e-05	0.00463758	3.AD/0.HA	GABA_neurons
ENSG00000112773	TENT5A	0.878676	4.43041	0.0231827	0.225397	3.AD/0.HA	GABA_neurons
ENSG00000203877	RIPPLY2	-1.30131	2.87407	0.014975	0.177441	3.AD/0.HA	GABA_neurons
ENSG00000228679	AL034347.1	0.81437	3.05015	0.0215844	0.217044	3.AD/0.HA	GABA_neurons
ENSG00000083099	LYRM2	-0.559417	4.76819	0.0158403	0.18151	3.AD/0.HA	GABA_neurons
ENSG00000118412	CASP8AP2	0.610387	5.6438	0.00352833	0.0758122	3.AD/0.HA	GABA_neurons
ENSG00000271860	AL589740.1	0.651431	8.23534	0.00505264	0.0934093	3.AD/0.HA	GABA_neurons
ENSG00000184486	POU3F2	1.37706	2.05893	0.0151926	0.177857	3.AD/0.HA	GABA_neurons
ENSG00000132423	COQ3	-0.909739	3.14215	0.0212794	0.215153	3.AD/0.HA	GABA_neurons
ENSG00000132424	PNISR	0.482276	8.05942	0.0119619	0.156369	3.AD/0.HA	GABA_neurons
ENSG00000260000	AL133338.1	-2.20332	1.51195	0.016393	0.185543	3.AD/0.HA	GABA_neurons
ENSG00000112333	NR2E1	0.964083	3.98118	0.0122505	0.159115	3.AD/0.HA	GABA_neurons
ENSG00000118689	FOXO3	0.444232	7.06176	0.0138505	0.170291	3.AD/0.HA	GABA_neurons
ENSG00000053328	METTL24	-0.772216	4.71296	0.00287507	0.0665911	3.AD/0.HA	GABA_neurons
ENSG00000287268	AL050350.1	-2.50152	0.792452	0.0199555	0.207209	3.AD/0.HA	GABA_neurons
ENSG00000155111	CDK19	0.489176	6.70918	0.0111652	0.151223	3.AD/0.HA	GABA_neurons
ENSG00000173214	MFSD4B	-0.667372	6.60326	0.000159547	0.0104619	3.AD/0.HA	GABA_neurons
ENSG00000189241	TSPYL1	-0.878381	5.08354	0.000209215	0.012477	3.AD/0.HA	GABA_neurons
ENSG00000111834	RSPH4A	-5.0233	0.856506	0.00208154	0.0542336	3.AD/0.HA	GABA_neurons
ENSG00000286339	Z99496.2	-2.20945	1.1532	0.0203773	0.209068	3.AD/0.HA	GABA_neurons
ENSG00000286540	AL096854.1	-1.73001	3.48592	0.002216	0.0562664	3.AD/0.HA	GABA_neurons
ENSG00000111897	SERINC1	-0.787353	6.87311	0.00708549	0.115793	3.AD/0.HA	GABA_neurons
ENSG00000164434	FABP7	-1.78297	2.00221	0.0212795	0.215153	3.AD/0.HA	GABA_neurons
ENSG00000236548	RNF217-AS1	-0.655641	6.1613	0.0115356	0.153368	3.AD/0.HA	GABA_neurons
ENSG00000164484	TMEM200A	-1.11215	2.44023	0.0275973	0.245576	3.AD/0.HA	GABA_neurons
ENSG00000112306	RPS12	-1.23097	5.28817	0.000911517	0.0325161	3.AD/0.HA	GABA_neurons
ENSG00000146411	SLC2A12	0.680834	3.73639	0.0277491	0.246463	3.AD/0.HA	GABA_neurons
ENSG00000118515	SGK1	0.5847	7.892	0.00806654	0.125317	3.AD/0.HA	GABA_neurons
ENSG00000112357	PEX7	-0.750829	4.19319	0.0080712	0.125317	3.AD/0.HA	GABA_neurons
ENSG00000135540	NHSL1	0.870694	3.90534	0.0176451	0.192632	3.AD/0.HA	GABA_neurons
ENSG00000279968	GVQW2	-1.17969	2.21356	0.0285055	0.249602	3.AD/0.HA	GABA_neurons
ENSG00000169976	SF3B5	-1.64208	2.02074	0.00915619	0.135517	3.AD/0.HA	GABA_neurons
ENSG00000224658	AL513164.1	-1.84941	2.31656	0.000812219	0.0300378	3.AD/0.HA	GABA_neurons
ENSG00000281021	AL078581.4	-1.84615	2.30584	0.000884413	0.0318294	3.AD/0.HA	GABA_neurons
ENSG00000223598	AL138733.1	-1.8838	1.59872	0.0136344	0.168967	3.AD/0.HA	GABA_neurons
ENSG00000120262	CCDC170	-0.828748	3.16668	0.0248962	0.234243	3.AD/0.HA	GABA_neurons
ENSG00000153721	CNKSR3	1.81372	3.44747	2.09767e-05	0.00265441	3.AD/0.HA	GABA_neurons
ENSG00000287092	AL589693.1	1.08386	5.34237	0.000211122	0.0125081	3.AD/0.HA	GABA_neurons
ENSG00000175048	ZDHHC14	0.604198	7.9417	0.00134215	0.0413921	3.AD/0.HA	GABA_neurons
ENSG00000236324	AL035634.1	-4.84424	0.752506	0.0051745	0.094626	3.AD/0.HA	GABA_neurons
ENSG00000078269	SYNJ2	1.30639	5.18877	0.0006857	0.0276216	3.AD/0.HA	GABA_neurons
ENSG00000130338	TULP4	0.421986	6.96114	0.0147641	0.176075	3.AD/0.HA	GABA_neurons
ENSG00000203711	C6orf99	-2.7687	0.89685	0.0234465	0.227091	3.AD/0.HA	GABA_neurons
ENSG00000146477	SLC22A3	1.46432	4.44682	0.00639899	0.108781	3.AD/0.HA	GABA_neurons
ENSG00000286805	AL138716.1	-2.40481	0.739655	0.0189329	0.201238	3.AD/0.HA	GABA_neurons
ENSG00000225437	PACRG-AS2	-2.7761	0.929747	0.0254127	0.235962	3.AD/0.HA	GABA_neurons
ENSG00000112531	QKI	0.536556	9.91332	0.0172487	0.190564	3.AD/0.HA	GABA_neurons
ENSG00000071242	RPS6KA2	0.4092	9.21222	0.028634	0.249974	3.AD/0.HA	GABA_neurons
ENSG00000285730	Z94721.3	-5.59461	1.20532	0.000200086	0.0121878	3.AD/0.HA	GABA_neurons
ENSG00000008018	PSMB1	-0.589773	5.06681	0.00878375	0.13203	3.AD/0.HA	GABA_neurons
ENSG00000225968	ELFN1	0.747766	5.01467	0.00525905	0.0958262	3.AD/0.HA	GABA_neurons
ENSG00000176349	AC104129.1	1.88586	1.27456	0.00252999	0.0617622	3.AD/0.HA	GABA_neurons
ENSG00000272953	AC092171.4	-1.56109	2.11875	0.013088	0.164919	3.AD/0.HA	GABA_neurons
ENSG00000136247	ZDHHC4	-1.15194	2.39432	0.0164005	0.185543	3.AD/0.HA	GABA_neurons
ENSG00000146574	CCZ1B	-0.881076	4.19535	0.00196355	0.0526961	3.AD/0.HA	GABA_neurons
ENSG00000106399	RPA3	-1.01194	3.30454	0.0113687	0.152464	3.AD/0.HA	GABA_neurons
ENSG00000189043	NDUFA4	-1.70827	5.82097	0.000303274	0.0157159	3.AD/0.HA	GABA_neurons
ENSG00000005108	THSD7A	0.514798	9.13455	0.0276571	0.246	3.AD/0.HA	GABA_neurons
ENSG00000006747	SCIN	1.63098	1.2831	0.00933823	0.137242	3.AD/0.HA	GABA_neurons
ENSG00000235837	AC073333.1	-2.14807	1.47795	0.00462414	0.0891478	3.AD/0.HA	GABA_neurons
ENSG00000106537	TSPAN13	-0.851921	5.01738	0.000637306	0.0260612	3.AD/0.HA	GABA_neurons
ENSG00000106546	AHR	-0.802917	5.23125	0.00122557	0.0394166	3.AD/0.HA	GABA_neurons
ENSG00000223838	AC007091.1	-1.96863	2.57566	0.00275947	0.0653945	3.AD/0.HA	GABA_neurons
ENSG00000183742	MACC1	1.3193	2.61894	0.00706559	0.115793	3.AD/0.HA	GABA_neurons
ENSG00000164651	SP8	1.25972	2.27693	0.00633723	0.108085	3.AD/0.HA	GABA_neurons
ENSG00000105889	STEAP1B	1.17445	2.73464	0.00534182	0.0968262	3.AD/0.HA	GABA_neurons
ENSG00000196683	TOMM7	-1.26217	4.22161	0.000473626	0.021614	3.AD/0.HA	GABA_neurons
ENSG00000286478	AC007130.1	-1.57969	1.82299	0.0191831	0.202442	3.AD/0.HA	GABA_neurons
ENSG00000146592	CREB5	1.09975	5.8201	4.85131e-06	0.00084739	3.AD/0.HA	GABA_neurons
ENSG00000106080	FKBP14	-0.732597	3.75868	0.0171855	0.190407	3.AD/0.HA	GABA_neurons
ENSG00000106113	CRHR2	1.06875	2.47833	0.0186199	0.19909	3.AD/0.HA	GABA_neurons
ENSG00000154678	PDE1C	0.801624	7.9826	6.40218e-06	0.00108101	3.AD/0.HA	GABA_neurons
ENSG00000164619	BMPER	-0.630111	7.18317	0.00280005	0.0659705	3.AD/0.HA	GABA_neurons
ENSG00000287249	AC005400.1	-1.18937	4.47191	6.04271e-05	0.00561639	3.AD/0.HA	GABA_neurons
ENSG00000122547	EEPD1	0.539911	7.11805	0.0150796	0.177711	3.AD/0.HA	GABA_neurons
ENSG00000011426	ANLN	1.33654	5.1561	3.4494e-09	4.65945e-06	3.AD/0.HA	GABA_neurons
ENSG00000136250	AOAH	0.682302	4.13958	0.00812596	0.125938	3.AD/0.HA	GABA_neurons
ENSG00000155849	ELMO1	0.892986	8.04466	1.086e-05	0.00160616	3.AD/0.HA	GABA_neurons
ENSG00000228434	AC004951.1	1.00011	4.1233	0.000601872	0.0253011	3.AD/0.HA	GABA_neurons
ENSG00000196262	PPIA	-1.11674	5.85815	0.000431994	0.020122	3.AD/0.HA	GABA_neurons
ENSG00000136205	TNS3	0.806403	4.39072	0.00203393	0.0537308	3.AD/0.HA	GABA_neurons
ENSG00000164744	SUN3	-1.27713	2.13477	0.0248406	0.233993	3.AD/0.HA	GABA_neurons
ENSG00000183696	UPP1	-0.645622	5.00382	0.00937643	0.137433	3.AD/0.HA	GABA_neurons
ENSG00000286987	AC006478.1	-3.13709	1.74712	0.000134971	0.00930198	3.AD/0.HA	GABA_neurons
ENSG00000231427	LINC01445	2.46874	2.4727	0.000151085	0.0100042	3.AD/0.HA	GABA_neurons
ENSG00000170419	VSTM2A	-0.497064	6.3623	0.0191705	0.202425	3.AD/0.HA	GABA_neurons
ENSG00000132432	SEC61G	-0.972552	3.88859	0.00228023	0.0572338	3.AD/0.HA	GABA_neurons
ENSG00000106153	CHCHD2	-1.53981	4.422	0.000155679	0.0102748	3.AD/0.HA	GABA_neurons
ENSG00000237310	AC008267.5	-1.2085	2.59128	0.0172685	0.190575	3.AD/0.HA	GABA_neurons
ENSG00000158321	AUTS2	0.48569	10.7634	0.00802206	0.125191	3.AD/0.HA	GABA_neurons
ENSG00000185274	GALNT17	0.724859	9.3021	6.31351e-05	0.00573651	3.AD/0.HA	GABA_neurons
ENSG00000272843	AC211476.2	-4.46756	0.535398	0.0249759	0.234396	3.AD/0.HA	GABA_neurons
ENSG00000006704	GTF2IRD1	0.715844	6.25143	0.000193038	0.0119613	3.AD/0.HA	GABA_neurons
ENSG00000232729	AC211433.1	-1.09435	3.99559	0.000676118	0.027329	3.AD/0.HA	GABA_neurons
ENSG00000178809	TRIM73	-0.858817	3.39912	0.0261235	0.238968	3.AD/0.HA	GABA_neurons
ENSG00000127946	HIP1	0.971934	5.92993	1.0063e-05	0.00153107	3.AD/0.HA	GABA_neurons
ENSG00000005486	RHBDD2	-0.900683	4.65376	0.000923196	0.0328749	3.AD/0.HA	GABA_neurons
ENSG00000127952	STYXL1	0.854463	4.20483	0.00403757	0.0828867	3.AD/0.HA	GABA_neurons
ENSG00000146701	MDH2	-1.13089	3.52579	0.00164464	0.0472007	3.AD/0.HA	GABA_neurons
ENSG00000223770	AC006145.1	-2.20455	1.79604	0.00507228	0.0935163	3.AD/0.HA	GABA_neurons
ENSG00000233073	AC005009.2	0.643966	5.21314	0.0114428	0.152994	3.AD/0.HA	GABA_neurons
ENSG00000075142	SRI	-0.612819	4.35092	0.0191189	0.202247	3.AD/0.HA	GABA_neurons
ENSG00000243144	AC079760.2	-1.11849	2.69062	0.01546	0.179205	3.AD/0.HA	GABA_neurons
ENSG00000240720	LRRD1	0.738808	3.45402	0.0145782	0.175301	3.AD/0.HA	GABA_neurons
ENSG00000236861	AC006378.1	-5.35389	1.04507	0.000387208	0.0186356	3.AD/0.HA	GABA_neurons
ENSG00000242265	PEG10	-0.805436	4.89286	0.00136045	0.0418169	3.AD/0.HA	GABA_neurons
ENSG00000105854	PON2	0.891853	3.84896	0.00509692	0.0937244	3.AD/0.HA	GABA_neurons
ENSG00000127922	SEM1	0.639642	7.24134	0.00208241	0.0542336	3.AD/0.HA	GABA_neurons
ENSG00000006128	TAC1	-2.25058	5.95767	0.000534266	0.0232899	3.AD/0.HA	GABA_neurons
ENSG00000160917	CPSF4	-0.988697	3.26559	0.0050516	0.0934093	3.AD/0.HA	GABA_neurons
ENSG00000241468	ATP5MF	-1.38418	3.86528	0.00416767	0.0842719	3.AD/0.HA	GABA_neurons
ENSG00000168090	COPS6	-0.978048	3.93962	0.0109765	0.149768	3.AD/0.HA	GABA_neurons
ENSG00000221838	AP4M1	-1.65647	2.62957	0.000787348	0.0296573	3.AD/0.HA	GABA_neurons
ENSG00000214300	SPDYE3	-1.23608	2.91683	0.00206284	0.0540016	3.AD/0.HA	GABA_neurons
ENSG00000172336	POP7	-1.86502	2.14911	0.0142269	0.172645	3.AD/0.HA	GABA_neurons
ENSG00000106400	ZNHIT1	-1.14147	2.90484	0.00595459	0.103975	3.AD/0.HA	GABA_neurons
ENSG00000257923	CUX1	0.465669	7.24627	0.0105237	0.145848	3.AD/0.HA	GABA_neurons
ENSG00000272219	AC005072.1	1.44645	1.00164	0.0282823	0.248345	3.AD/0.HA	GABA_neurons
ENSG00000234715	AC005064.1	-1.96922	3.57162	0.00251037	0.0614314	3.AD/0.HA	GABA_neurons
ENSG00000237513	AC007384.1	-1.15304	3.09086	0.00244421	0.0603323	3.AD/0.HA	GABA_neurons
ENSG00000243193	AC006387.1	-1.31701	3.33435	0.00097166	0.0340837	3.AD/0.HA	GABA_neurons
ENSG00000172209	GPR22	-0.894979	4.32363	0.00483401	0.0911133	3.AD/0.HA	GABA_neurons
ENSG00000091140	DLD	-0.487355	5.19203	0.0265056	0.241049	3.AD/0.HA	GABA_neurons
ENSG00000225572	DOCK4-AS1	-2.26136	1.85488	0.00204331	0.0539083	3.AD/0.HA	GABA_neurons
ENSG00000223646	AC002463.1	-1.19462	4.31185	0.000244364	0.0137155	3.AD/0.HA	GABA_neurons
ENSG00000226367	ST7-AS2	-1.26205	3.45974	0.000299263	0.0155479	3.AD/0.HA	GABA_neurons
ENSG00000077063	CTTNBP2	0.419581	8.09185	0.0150766	0.177711	3.AD/0.HA	GABA_neurons
ENSG00000240499	AC004594.1	-2.12032	2.66465	0.000150288	0.0100042	3.AD/0.HA	GABA_neurons
ENSG00000128609	NDUFA5	-0.779163	5.12594	0.00109721	0.0369297	3.AD/0.HA	GABA_neurons
ENSG00000241345	AC004690.2	1.81359	1.42431	0.00634398	0.108109	3.AD/0.HA	GABA_neurons
ENSG00000242593	AC006148.1	0.587843	8.42891	0.00159225	0.0465106	3.AD/0.HA	GABA_neurons
ENSG00000170775	GPR37	1.07941	3.69613	0.000711773	0.0281228	3.AD/0.HA	GABA_neurons
ENSG00000128524	ATP6V1F	-1.50047	3.96674	0.000202011	0.0122508	3.AD/0.HA	GABA_neurons
ENSG00000240571	AC087071.2	-2.19551	1.81799	0.00535208	0.0968262	3.AD/0.HA	GABA_neurons
ENSG00000285106	AC016831.7	0.673333	7.37811	0.000219104	0.0127939	3.AD/0.HA	GABA_neurons
ENSG00000226380	AC016831.1	0.655587	4.9575	0.00765419	0.121543	3.AD/0.HA	GABA_neurons
ENSG00000221866	PLXNA4	0.840183	8.43575	0.000334041	0.0169115	3.AD/0.HA	GABA_neurons
ENSG00000234352	AC009264.1	-0.846886	4.02891	0.0224617	0.221146	3.AD/0.HA	GABA_neurons
ENSG00000105894	PTN	0.788243	5.25937	0.00237367	0.0591138	3.AD/0.HA	GABA_neurons
ENSG00000064393	HIPK2	0.846133	6.79351	0.000210841	0.0125081	3.AD/0.HA	GABA_neurons
ENSG00000059377	TBXAS1	1.16653	3.40011	0.00567709	0.100991	3.AD/0.HA	GABA_neurons
ENSG00000006459	KDM7A	0.624736	5.30339	0.00650428	0.1101	3.AD/0.HA	GABA_neurons
ENSG00000260231	KDM7A-DT	-4.47212	0.536042	0.0254411	0.235962	3.AD/0.HA	GABA_neurons
ENSG00000106123	EPHB6	-1.25111	4.01805	0.00127149	0.0400668	3.AD/0.HA	GABA_neurons
ENSG00000197448	GSTK1	-0.815582	3.8116	0.00951006	0.138329	3.AD/0.HA	GABA_neurons
ENSG00000197024	ZNF398	0.50859	5.32336	0.0122268	0.158909	3.AD/0.HA	GABA_neurons
ENSG00000164885	CDK5	-1.93184	2.37203	0.000567479	0.0242952	3.AD/0.HA	GABA_neurons
ENSG00000239911	PRKAG2-AS1	-1.95488	2.24888	0.00287397	0.0665911	3.AD/0.HA	GABA_neurons
ENSG00000130226	DPP6	0.541743	10.3452	0.00197586	0.0529112	3.AD/0.HA	GABA_neurons
ENSG00000186480	INSIG1	-0.949885	3.7254	0.00159305	0.0465106	3.AD/0.HA	GABA_neurons
ENSG00000105982	RNF32	-1.67697	1.68951	0.0251034	0.235157	3.AD/0.HA	GABA_neurons
ENSG00000182372	CLN8	0.695826	4.03317	0.00937443	0.137433	3.AD/0.HA	GABA_neurons
ENSG00000183117	CSMD1	0.707457	11.9988	0.00222229	0.0563556	3.AD/0.HA	GABA_neurons
ENSG00000286934	AC027251.1	-1.40971	2.75221	0.00296168	0.0678074	3.AD/0.HA	GABA_neurons
ENSG00000091879	ANGPT2	-0.700146	4.41251	0.0069542	0.114744	3.AD/0.HA	GABA_neurons
ENSG00000253893	FAM85B	0.794387	4.22563	0.0136095	0.168967	3.AD/0.HA	GABA_neurons
ENSG00000285675	AC023385.1	-1.25072	2.3637	0.0256772	0.236502	3.AD/0.HA	GABA_neurons
ENSG00000253649	PRSS51	-1.05196	3.50463	0.00461036	0.0890515	3.AD/0.HA	GABA_neurons
ENSG00000164741	DLC1	0.622014	7.59668	0.00287569	0.0665911	3.AD/0.HA	GABA_neurons
ENSG00000129422	MTUS1	0.518562	6.62485	0.00308607	0.0700223	3.AD/0.HA	GABA_neurons
ENSG00000253944	AC027117.2	1.46308	2.22934	0.01116	0.151223	3.AD/0.HA	GABA_neurons
ENSG00000104763	ASAH1	-0.582457	5.32068	0.0113491	0.152464	3.AD/0.HA	GABA_neurons
ENSG00000147416	ATP6V1B2	-0.569396	5.45942	0.0156511	0.180388	3.AD/0.HA	GABA_neurons
ENSG00000130227	XPO7	0.407851	6.64519	0.0183224	0.196642	3.AD/0.HA	GABA_neurons
ENSG00000168490	PHYHIP	-1.04016	3.35133	0.0198584	0.206662	3.AD/0.HA	GABA_neurons
ENSG00000042980	ADAM28	1.20041	3.20697	0.0272625	0.244433	3.AD/0.HA	GABA_neurons
ENSG00000277586	NEFL	-1.6065	4.84186	0.0118666	0.155525	3.AD/0.HA	GABA_neurons
ENSG00000147459	DOCK5	1.63495	5.79651	2.95809e-07	0.000110994	3.AD/0.HA	GABA_neurons
ENSG00000104765	BNIP3L	0.588467	6.71077	0.00830807	0.127336	3.AD/0.HA	GABA_neurons
ENSG00000240694	PNMA2	-0.728352	6.03699	0.00248667	0.0609986	3.AD/0.HA	GABA_neurons
ENSG00000120903	CHRNA2	1.40907	1.86624	0.0224112	0.220757	3.AD/0.HA	GABA_neurons
ENSG00000120885	CLU	-0.646668	7.29347	0.00751062	0.120111	3.AD/0.HA	GABA_neurons
ENSG00000253567	AC025871.1	-2.8852	1.00521	0.00977014	0.140002	3.AD/0.HA	GABA_neurons
ENSG00000197892	KIF13B	0.936527	6.21913	8.2297e-07	0.00022927	3.AD/0.HA	GABA_neurons
ENSG00000133872	SARAF	-0.757522	6.65822	0.000354538	0.0175669	3.AD/0.HA	GABA_neurons
ENSG00000285669	AC026979.4	0.801278	3.26498	0.0238488	0.228259	3.AD/0.HA	GABA_neurons
ENSG00000253108	AC090993.1	-2.31977	4.00781	0.000107209	0.00798626	3.AD/0.HA	GABA_neurons
ENSG00000286693	AC105230.1	-1.83089	3.3299	1.41137e-05	0.00195872	3.AD/0.HA	GABA_neurons
ENSG00000104332	SFRP1	-1.75441	3.60263	4.19539e-05	0.00442744	3.AD/0.HA	GABA_neurons
ENSG00000104365	IKBKB	0.55483	5.03069	0.0156284	0.180347	3.AD/0.HA	GABA_neurons
ENSG00000034239	EFCAB1	-2.61776	1.47558	0.022203	0.219525	3.AD/0.HA	GABA_neurons
ENSG00000147488	ST18	1.8783	7.27993	5.20136e-11	1.54884e-07	3.AD/0.HA	GABA_neurons
ENSG00000253976	AC022679.2	-1.30485	2.6696	0.00387912	0.0808629	3.AD/0.HA	GABA_neurons
ENSG00000170791	CHCHD7	-1.51099	2.73957	0.000979011	0.0340837	3.AD/0.HA	GABA_neurons
ENSG00000253116	AC027698.1	-1.94315	3.20114	3.69565e-05	0.00398304	3.AD/0.HA	GABA_neurons
ENSG00000171316	CHD7	1.34905	5.6377	1.61782e-06	0.000372503	3.AD/0.HA	GABA_neurons
ENSG00000177182	CLVS1	0.513831	7.73291	0.00680061	0.113205	3.AD/0.HA	GABA_neurons
ENSG00000137563	GGH	-1.02171	3.14167	0.0096461	0.139436	3.AD/0.HA	GABA_neurons
ENSG00000253554	LINC01414	0.533631	6.98073	0.0151556	0.177827	3.AD/0.HA	GABA_neurons
ENSG00000172817	CYP7B1	0.725416	5.31966	0.00810785	0.12579	3.AD/0.HA	GABA_neurons
ENSG00000271966	AC021321.1	-2.11419	1.08892	0.0213246	0.2155	3.AD/0.HA	GABA_neurons
ENSG00000255206	AC011853.2	-2.38482	1.21676	0.018139	0.195496	3.AD/0.HA	GABA_neurons
ENSG00000221947	XKR9	-1.19409	3.46997	0.0037598	0.0787808	3.AD/0.HA	GABA_neurons
ENSG00000147604	RPL7	-1.53961	4.98186	0.00283228	0.0663442	3.AD/0.HA	GABA_neurons
ENSG00000254538	AC027018.1	-1.52302	3.8563	5.41398e-05	0.00524871	3.AD/0.HA	GABA_neurons
ENSG00000154582	ELOC	-0.876957	4.32165	0.00275788	0.0653945	3.AD/0.HA	GABA_neurons
ENSG00000104381	GDAP1	0.510017	8.58922	0.0136328	0.168967	3.AD/0.HA	GABA_neurons
ENSG00000254349	MIR2052HG	0.607973	7.10235	0.0161469	0.183651	3.AD/0.HA	GABA_neurons
ENSG00000091656	ZFHX4	1.26345	5.25499	8.94524e-06	0.00140503	3.AD/0.HA	GABA_neurons
ENSG00000104432	IL7	-1.68538	4.39038	5.74692e-06	0.000986814	3.AD/0.HA	GABA_neurons
ENSG00000104435	STMN2	-0.537803	7.18183	0.00532365	0.0966557	3.AD/0.HA	GABA_neurons
ENSG00000164687	FABP5	-0.859951	4.21066	0.00611667	0.105657	3.AD/0.HA	GABA_neurons
ENSG00000176731	RBIS	-0.756513	4.06559	0.00817419	0.126421	3.AD/0.HA	GABA_neurons
ENSG00000133742	CA1	-1.61779	3.18216	0.000701197	0.0280784	3.AD/0.HA	GABA_neurons
ENSG00000253154	AC100801.1	1.33782	1.89495	0.0275186	0.245199	3.AD/0.HA	GABA_neurons
ENSG00000104320	NBN	-0.50341	5.45556	0.0108108	0.148306	3.AD/0.HA	GABA_neurons
ENSG00000104327	CALB1	-1.71827	4.23748	6.43027e-05	0.00579067	3.AD/0.HA	GABA_neurons
ENSG00000253394	LINC00534	-0.717932	4.67849	0.0121625	0.158276	3.AD/0.HA	GABA_neurons
ENSG00000254251	AC103770.1	-1.08278	2.80369	0.0136833	0.169023	3.AD/0.HA	GABA_neurons
ENSG00000253197	AC117834.1	-2.28615	3.00992	6.06264e-07	0.000194986	3.AD/0.HA	GABA_neurons
ENSG00000271971	AC120053.1	-2.07293	1.06396	0.0208424	0.21214	3.AD/0.HA	GABA_neurons
ENSG00000156467	UQCRB	-1.05538	5.45433	0.00101231	0.0348243	3.AD/0.HA	GABA_neurons
ENSG00000104324	CPQ	0.505613	6.23024	0.0160838	0.183187	3.AD/0.HA	GABA_neurons
ENSG00000156482	RPL30	-0.918057	5.27072	0.00159088	0.0465106	3.AD/0.HA	GABA_neurons
ENSG00000164919	COX6C	-0.972302	5.70133	0.00190062	0.0516045	3.AD/0.HA	GABA_neurons
ENSG00000147669	POLR2K	-1.16123	3.09773	0.00708108	0.115793	3.AD/0.HA	GABA_neurons
ENSG00000164930	FZD6	-1.36603	3.08154	0.00100072	0.0344841	3.AD/0.HA	GABA_neurons
ENSG00000251003	ZFPM2-AS1	-1.38727	4.34711	0.000243563	0.0137155	3.AD/0.HA	GABA_neurons
ENSG00000164830	OXR1	0.516841	9.9681	0.0114521	0.152994	3.AD/0.HA	GABA_neurons
ENSG00000154188	ANGPT1	0.995548	5.78507	1.97172e-06	0.000429581	3.AD/0.HA	GABA_neurons
ENSG00000287949	AC025508.1	-1.93727	1.64444	0.00841186	0.128151	3.AD/0.HA	GABA_neurons
ENSG00000147654	EBAG9	-0.898659	3.93532	0.00337128	0.0737677	3.AD/0.HA	GABA_neurons
ENSG00000253877	LINC01608	1.80269	5.50524	1.95264e-05	0.00252002	3.AD/0.HA	GABA_neurons
ENSG00000286946	AC024996.1	-1.5188	2.07824	0.014724	0.176044	3.AD/0.HA	GABA_neurons
ENSG00000225885	AC023590.1	-0.799492	4.88109	0.00205282	0.0539484	3.AD/0.HA	GABA_neurons
ENSG00000136960	ENPP2	1.25399	5.6212	8.64609e-08	4.7857e-05	3.AD/0.HA	GABA_neurons
ENSG00000155792	DEPTOR	0.623308	4.88314	0.023606	0.227361	3.AD/0.HA	GABA_neurons
ENSG00000178764	ZHX2	0.781898	5.7656	0.000613523	0.0254738	3.AD/0.HA	GABA_neurons
ENSG00000253607	AC104316.1	-1.91907	1.33436	0.0196887	0.205529	3.AD/0.HA	GABA_neurons
ENSG00000156804	FBXO32	0.531546	5.176	0.00992325	0.140802	3.AD/0.HA	GABA_neurons
ENSG00000147684	NDUFB9	-1.18324	4.2413	0.000103124	0.00776764	3.AD/0.HA	GABA_neurons
ENSG00000287195	AC131568.1	-1.12215	2.71096	0.0154195	0.179043	3.AD/0.HA	GABA_neurons
ENSG00000253117	OC90	2.02263	1.61105	0.00050143	0.0224932	3.AD/0.HA	GABA_neurons
ENSG00000132297	HHLA1	1.79364	2.59055	2.57653e-05	0.00305297	3.AD/0.HA	GABA_neurons
ENSG00000184156	KCNQ3	0.586731	9.8628	0.000597868	0.0252375	3.AD/0.HA	GABA_neurons
ENSG00000104419	NDRG1	0.644343	4.23844	0.0105941	0.146725	3.AD/0.HA	GABA_neurons
ENSG00000123908	AGO2	0.468549	5.71225	0.0100756	0.14187	3.AD/0.HA	GABA_neurons
ENSG00000253741	LNCOC1	-1.69484	2.16611	0.013175	0.165603	3.AD/0.HA	GABA_neurons
ENSG00000160932	LY6E	-1.69686	3.01818	0.000535638	0.0232899	3.AD/0.HA	GABA_neurons
ENSG00000176956	LY6H	-1.70209	4.99759	1.08906e-07	5.80698e-05	3.AD/0.HA	GABA_neurons
ENSG00000147813	NAPRT	-1.62483	1.4208	0.0204026	0.209103	3.AD/0.HA	GABA_neurons
ENSG00000178209	PLEC	0.559445	5.08347	0.0144344	0.174345	3.AD/0.HA	GABA_neurons
ENSG00000178719	GRINA	-1.02129	3.64159	0.00638655	0.108743	3.AD/0.HA	GABA_neurons
ENSG00000179091	CYC1	-1.28743	2.93895	0.00578008	0.102464	3.AD/0.HA	GABA_neurons
ENSG00000160948	VPS28	-1.17223	3.50106	0.00237482	0.0591138	3.AD/0.HA	GABA_neurons
ENSG00000187954	CYHR1	-1.06857	3.99774	0.00138587	0.0422263	3.AD/0.HA	GABA_neurons
ENSG00000265393	AC084125.4	-4.48958	0.564426	0.0167068	0.187334	3.AD/0.HA	GABA_neurons
ENSG00000161016	RPL8	-1.29848	4.55898	0.00429052	0.0856412	3.AD/0.HA	GABA_neurons
ENSG00000107099	DOCK8	1.64179	5.22283	3.30359e-07	0.000119531	3.AD/0.HA	GABA_neurons
ENSG00000107104	KANK1	1.77266	6.25725	1.61083e-11	8.15965e-08	3.AD/0.HA	GABA_neurons
ENSG00000236404	VLDLR-AS1	0.435902	6.26753	0.0267447	0.242009	3.AD/0.HA	GABA_neurons
ENSG00000120210	INSL6	-3.62221	1.48573	0.000330252	0.0167709	3.AD/0.HA	GABA_neurons
ENSG00000120217	CD274	-1.56542	1.60132	0.0205801	0.210467	3.AD/0.HA	GABA_neurons
ENSG00000137038	DMAC1	-0.875885	4.02356	0.0028095	0.0660878	3.AD/0.HA	GABA_neurons
ENSG00000234740	AL162386.2	2.1751	0.653435	0.0134448	0.168263	3.AD/0.HA	GABA_neurons
ENSG00000173068	BNC2	1.53696	3.25411	0.000360988	0.0177964	3.AD/0.HA	GABA_neurons
ENSG00000155876	RRAGA	-1.76914	3.42915	0.000181545	0.0115675	3.AD/0.HA	GABA_neurons
ENSG00000137154	RPS6	-1.06842	5.0138	0.00105624	0.0359263	3.AD/0.HA	GABA_neurons
ENSG00000184434	LRRC19	-5.12015	0.888328	0.00285937	0.0665911	3.AD/0.HA	GABA_neurons
ENSG00000285103	AL451123.1	-2.55513	1.74581	0.000453605	0.0209527	3.AD/0.HA	GABA_neurons
ENSG00000107341	UBE2R2	0.480854	7.00888	0.00835823	0.127908	3.AD/0.HA	GABA_neurons
ENSG00000168913	ENHO	-1.90998	3.18042	0.000987262	0.0342533	3.AD/0.HA	GABA_neurons
ENSG00000213930	GALT	-0.943912	3.46372	0.00969319	0.139735	3.AD/0.HA	GABA_neurons
ENSG00000165283	STOML2	-1.89432	2.03071	0.00972844	0.139799	3.AD/0.HA	GABA_neurons
ENSG00000269900	RMRP	0.977692	3.35323	0.0266852	0.24195	3.AD/0.HA	GABA_neurons
ENSG00000159884	CCDC107	-1.10935	2.96132	0.0128675	0.163685	3.AD/0.HA	GABA_neurons
ENSG00000137133	HINT2	-1.87153	1.53822	0.016644	0.18694	3.AD/0.HA	GABA_neurons
ENSG00000175768	TOMM5	-1.07209	3.5828	0.00405664	0.0829836	3.AD/0.HA	GABA_neurons
ENSG00000107338	SHB	0.864247	4.20972	0.00264827	0.0636526	3.AD/0.HA	GABA_neurons
ENSG00000180071	ANKRD18A	1.21751	4.47634	4.35314e-05	0.00450301	3.AD/0.HA	GABA_neurons
ENSG00000240240	BX664727.3	0.852602	4.07284	0.00243267	0.0603315	3.AD/0.HA	GABA_neurons
ENSG00000236733	AL354794.1	-2.68909	1.45349	0.00375896	0.0787808	3.AD/0.HA	GABA_neurons
ENSG00000107362	ABHD17B	0.665702	5.04286	0.00461512	0.0890587	3.AD/0.HA	GABA_neurons
ENSG00000119125	GDA	-0.605617	5.25432	0.0268917	0.242492	3.AD/0.HA	GABA_neurons
ENSG00000225434	LINC01504	-4.64248	0.641874	0.0152335	0.177959	3.AD/0.HA	GABA_neurons
ENSG00000135002	RFK	-0.896629	4.20204	0.0044123	0.086798	3.AD/0.HA	GABA_neurons
ENSG00000187210	GCNT1	-0.597824	4.43622	0.0285655	0.249827	3.AD/0.HA	GABA_neurons
ENSG00000106772	PRUNE2	0.46182	7.27211	0.00907024	0.135062	3.AD/0.HA	GABA_neurons
ENSG00000148057	IDNK	-0.939873	2.8776	0.0234838	0.227126	3.AD/0.HA	GABA_neurons
ENSG00000285556	AL354897.1	1.38245	2.2951	0.00199678	0.0531636	3.AD/0.HA	GABA_neurons
ENSG00000135047	CTSL	-0.974371	3.43046	0.0220427	0.219293	3.AD/0.HA	GABA_neurons
ENSG00000287750	AL353572.4	-2.09519	1.06228	0.0222077	0.219525	3.AD/0.HA	GABA_neurons
ENSG00000165025	SYK	1.23858	2.27684	0.0130168	0.164488	3.AD/0.HA	GABA_neurons
ENSG00000237422	AL158071.4	1.25993	2.16803	0.021209	0.214676	3.AD/0.HA	GABA_neurons
ENSG00000106819	ASPN	-1.6229	2.3252	0.0195738	0.204647	3.AD/0.HA	GABA_neurons
ENSG00000106823	ECM2	-1.42656	2.48488	0.0141272	0.172443	3.AD/0.HA	GABA_neurons
ENSG00000185920	PTCH1	0.528154	4.73091	0.0262978	0.240021	3.AD/0.HA	GABA_neurons
ENSG00000130958	SLC35D2	1.30472	1.83278	0.0167978	0.187524	3.AD/0.HA	GABA_neurons
ENSG00000081377	CDC14B	0.855691	7.10383	1.58216e-06	0.000368559	3.AD/0.HA	GABA_neurons
ENSG00000203279	AL590705.1	0.750351	5.73479	0.00113308	0.0376295	3.AD/0.HA	GABA_neurons
ENSG00000165138	ANKS6	0.562446	5.63421	0.00550591	0.0988138	3.AD/0.HA	GABA_neurons
ENSG00000254571	AL358937.1	1.4755	2.43751	0.00315636	0.0708391	3.AD/0.HA	GABA_neurons
ENSG00000165152	TMEM246	-0.760813	4.31975	0.014362	0.173733	3.AD/0.HA	GABA_neurons
ENSG00000070214	SLC44A1	0.929217	7.93561	2.30804e-06	0.000483411	3.AD/0.HA	GABA_neurons
ENSG00000234323	LINC01505	0.690714	6.86162	0.0106259	0.146867	3.AD/0.HA	GABA_neurons
ENSG00000230782	AL807761.4	-1.35148	2.8495	0.00975052	0.139919	3.AD/0.HA	GABA_neurons
ENSG00000136810	TXN	-1.01741	4.78268	0.000668048	0.0271262	3.AD/0.HA	GABA_neurons
ENSG00000165124	SVEP1	0.638617	7.31374	0.023844	0.228259	3.AD/0.HA	GABA_neurons
ENSG00000198121	LPAR1	0.657528	5.31987	0.00391162	0.0812062	3.AD/0.HA	GABA_neurons
ENSG00000165181	SHOC1	-0.907848	4.09701	0.00405841	0.0829836	3.AD/0.HA	GABA_neurons
ENSG00000148158	SNX30	0.468348	5.58974	0.0171141	0.189801	3.AD/0.HA	GABA_neurons
ENSG00000285447	ZNF883	-0.727555	4.44054	0.0281885	0.24796	3.AD/0.HA	GABA_neurons
ENSG00000136883	KIF12	-4.49479	0.567258	0.0163461	0.185134	3.AD/0.HA	GABA_neurons
ENSG00000136888	ATP6V1G1	-0.967291	4.73224	0.000714916	0.0281228	3.AD/0.HA	GABA_neurons
ENSG00000148219	ASTN2	0.556451	9.31525	0.0133942	0.167824	3.AD/0.HA	GABA_neurons
ENSG00000229105	ASTN2-AS1	-1.51515	2.58171	0.0234619	0.227123	3.AD/0.HA	GABA_neurons
ENSG00000136861	CDK5RAP2	0.53891	6.09299	0.00355277	0.0760953	3.AD/0.HA	GABA_neurons
ENSG00000106780	MEGF9	0.418877	6.64649	0.0141664	0.172443	3.AD/0.HA	GABA_neurons
ENSG00000148180	GSN	1.0217	4.80823	0.000118661	0.00849581	3.AD/0.HA	GABA_neurons
ENSG00000175764	TTLL11	0.384156	6.9519	0.0287351	0.249992	3.AD/0.HA	GABA_neurons
ENSG00000136942	RPL35	-1.38795	5.05471	9.18004e-05	0.0071817	3.AD/0.HA	GABA_neurons
ENSG00000136950	ARPC5L	-0.898281	3.91161	0.0278008	0.246463	3.AD/0.HA	GABA_neurons
ENSG00000167081	PBX3	1.26569	6.22811	0.00509909	0.0937244	3.AD/0.HA	GABA_neurons
ENSG00000197958	RPL12	-1.21873	4.18984	0.000262207	0.0142523	3.AD/0.HA	GABA_neurons
ENSG00000279571	AL162426.1	-1.84735	2.56464	0.00370336	0.0782456	3.AD/0.HA	GABA_neurons
ENSG00000106992	AK1	-0.991255	3.28068	0.0192528	0.202861	3.AD/0.HA	GABA_neurons
ENSG00000136908	DPM2	-1.72488	2.59312	0.00123305	0.0395318	3.AD/0.HA	GABA_neurons
ENSG00000148334	PTGES2	-1.21682	3.14364	0.00354017	0.0759862	3.AD/0.HA	GABA_neurons
ENSG00000171159	C9orf16	-1.50093	3.85964	0.00205152	0.0539484	3.AD/0.HA	GABA_neurons
ENSG00000167123	CERCAM	1.20109	4.25283	0.000738072	0.028483	3.AD/0.HA	GABA_neurons
ENSG00000097007	ABL1	0.468672	6.40073	0.0136291	0.168967	3.AD/0.HA	GABA_neurons
ENSG00000126878	AIF1L	1.97762	1.30882	0.00155675	0.045648	3.AD/0.HA	GABA_neurons
ENSG00000148303	RPL7A	-1.47952	5.27642	1.30174e-05	0.00184447	3.AD/0.HA	GABA_neurons
ENSG00000130558	OLFM1	-0.707872	5.75369	0.00596585	0.103975	3.AD/0.HA	GABA_neurons
ENSG00000148411	NACC2	0.823947	4.96878	0.00140492	0.0426144	3.AD/0.HA	GABA_neurons
ENSG00000233016	SNHG7	-1.24491	3.29304	0.00450792	0.0878264	3.AD/0.HA	GABA_neurons
ENSG00000054148	PHPT1	-1.48486	3.58119	0.0067188	0.112416	3.AD/0.HA	GABA_neurons
ENSG00000187713	TMEM203	-2.42467	1.66643	0.00117817	0.0387266	3.AD/0.HA	GABA_neurons
ENSG00000188229	TUBB4B	-1.67222	3.78953	0.000315179	0.0161284	3.AD/0.HA	GABA_neurons
ENSG00000261456	TUBB8	1.25477	1.73805	0.0232924	0.225922	3.AD/0.HA	GABA_neurons
ENSG00000151240	DIP2C	0.447261	8.62607	0.0104051	0.144899	3.AD/0.HA	GABA_neurons
ENSG00000067064	IDI1	-0.711302	4.41002	0.0143739	0.173773	3.AD/0.HA	GABA_neurons
ENSG00000185736	ADARB2	0.969288	11.9687	0.00115904	0.0382485	3.AD/0.HA	GABA_neurons
ENSG00000287043	AL392083.2	1.92585	1.30866	0.00820153	0.126616	3.AD/0.HA	GABA_neurons
ENSG00000236892	AL357833.1	-4.56131	0.650429	0.0123669	0.159758	3.AD/0.HA	GABA_neurons
ENSG00000165568	AKR1E2	-1.69425	3.15383	0.000253071	0.0140486	3.AD/0.HA	GABA_neurons
ENSG00000151632	AKR1C2	-1.43225	2.3706	0.00510034	0.0937244	3.AD/0.HA	GABA_neurons
ENSG00000226647	AL365356.1	-0.969652	3.14538	0.0197861	0.206121	3.AD/0.HA	GABA_neurons
ENSG00000229240	LINC00710	-5.2997	1.08848	0.00428461	0.0856162	3.AD/0.HA	GABA_neurons
ENSG00000237986	CELF2-AS2	-1.03155	3.06115	0.0115057	0.153188	3.AD/0.HA	GABA_neurons
ENSG00000229751	AC044781.1	-0.89348	3.49143	0.00725751	0.11736	3.AD/0.HA	GABA_neurons
ENSG00000065809	FAM107B	1.25302	5.18565	2.22061e-09	4.09037e-06	3.AD/0.HA	GABA_neurons
ENSG00000148484	RSU1	0.402193	5.81774	0.0280599	0.247303	3.AD/0.HA	GABA_neurons
ENSG00000148488	ST8SIA6	1.54558	4.24538	0.000813876	0.0300378	3.AD/0.HA	GABA_neurons
ENSG00000165995	CACNB2	0.470617	8.68023	0.0143145	0.173366	3.AD/0.HA	GABA_neurons
ENSG00000136770	DNAJC1	0.418426	6.92191	0.0205105	0.209997	3.AD/0.HA	GABA_neurons
ENSG00000148444	COMMD3	-0.907735	3.03544	0.0253093	0.235886	3.AD/0.HA	GABA_neurons
ENSG00000077327	SPAG6	-2.62732	1.45997	0.00732288	0.118084	3.AD/0.HA	GABA_neurons
ENSG00000150867	PIP4K2A	1.37112	7.38697	2.55e-09	4.30568e-06	3.AD/0.HA	GABA_neurons
ENSG00000151023	ENKUR	-1.27295	2.72415	0.00360663	0.0769142	3.AD/0.HA	GABA_neurons
ENSG00000095777	MYO3A	-1.4571	3.57718	0.00984155	0.140429	3.AD/0.HA	GABA_neurons
ENSG00000136750	GAD2	-0.60986	7.86476	0.00921889	0.135849	3.AD/0.HA	GABA_neurons
ENSG00000229327	AL391839.1	-1.75905	1.93515	0.00596797	0.103975	3.AD/0.HA	GABA_neurons
ENSG00000165507	DEPP1	-2.76561	0.934618	0.0106278	0.146867	3.AD/0.HA	GABA_neurons
ENSG00000285294	LINC00842	-2.02208	1.90934	0.00203359	0.0537308	3.AD/0.HA	GABA_neurons
ENSG00000276850	AC245041.2	-4.5742	0.605792	0.0189026	0.201238	3.AD/0.HA	GABA_neurons
ENSG00000128815	WDFY4	1.80069	1.82534	0.000730126	0.0284242	3.AD/0.HA	GABA_neurons
ENSG00000204161	TMEM273	1.95027	0.853226	0.0118617	0.155525	3.AD/0.HA	GABA_neurons
ENSG00000285803	AL442003.1	-2.06129	1.42012	0.0251149	0.235157	3.AD/0.HA	GABA_neurons
ENSG00000286401	AC069547.2	-2.07185	1.05936	0.0255382	0.236067	3.AD/0.HA	GABA_neurons
ENSG00000231131	LNCAROD	2.06357	3.5709	0.000113268	0.00825378	3.AD/0.HA	GABA_neurons
ENSG00000234173	AL353784.1	-2.23767	3.2664	3.83841e-06	0.000707034	3.AD/0.HA	GABA_neurons
ENSG00000122870	BICC1	1.5845	6.82558	1.31777e-10	3.33759e-07	3.AD/0.HA	GABA_neurons
ENSG00000232682	AL592430.1	-1.17262	2.40512	0.0144384	0.174345	3.AD/0.HA	GABA_neurons
ENSG00000138311	ZNF365	0.679866	4.74815	0.0205848	0.210467	3.AD/0.HA	GABA_neurons
ENSG00000228065	LINC01515	4.44809	4.53951	6.97695e-05	0.00601634	3.AD/0.HA	GABA_neurons
ENSG00000183230	CTNNA3	0.85272	8.11032	0.00126848	0.0400668	3.AD/0.HA	GABA_neurons
ENSG00000198739	LRRTM3	0.537719	9.25707	0.00498446	0.092656	3.AD/0.HA	GABA_neurons
ENSG00000122912	SLC25A16	0.488046	5.82167	0.00663035	0.111397	3.AD/0.HA	GABA_neurons
ENSG00000099282	TSPAN15	1.52085	2.80083	1.8282e-05	0.00242111	3.AD/0.HA	GABA_neurons
ENSG00000287306	AC016821.1	1.79814	3.16237	5.53512e-05	0.00528429	3.AD/0.HA	GABA_neurons
ENSG00000148734	NPFFR1	1.54254	2.34183	0.000828387	0.0304072	3.AD/0.HA	GABA_neurons
ENSG00000107719	PALD1	1.19953	2.88806	0.00659805	0.111038	3.AD/0.HA	GABA_neurons
ENSG00000138316	ADAMTS14	1.68665	1.09028	0.0128195	0.163436	3.AD/0.HA	GABA_neurons
ENSG00000166228	PCBD1	-1.50623	2.88626	0.000561325	0.0241991	3.AD/0.HA	GABA_neurons
ENSG00000107736	CDH23	1.49099	2.51194	0.00220035	0.0560095	3.AD/0.HA	GABA_neurons
ENSG00000197746	PSAP	-0.907141	6.38935	0.000190087	0.0118375	3.AD/0.HA	GABA_neurons
ENSG00000122863	CHST3	1.89048	2.40682	8.67985e-06	0.00137399	3.AD/0.HA	GABA_neurons
ENSG00000272599	AC016394.2	-2.8177	0.963536	0.015057	0.177711	3.AD/0.HA	GABA_neurons
ENSG00000166348	USP54	0.638007	6.37086	0.000483896	0.0219344	3.AD/0.HA	GABA_neurons
ENSG00000172586	CHCHD1	-1.35359	2.72636	0.0111472	0.151181	3.AD/0.HA	GABA_neurons
ENSG00000232342	AC022540.1	-1.69572	1.70511	0.0192867	0.203035	3.AD/0.HA	GABA_neurons
ENSG00000165637	VDAC2	-0.806357	4.466	0.00406035	0.0829836	3.AD/0.HA	GABA_neurons
ENSG00000148655	LRMDA	1.01128	5.86648	0.000237971	0.0135589	3.AD/0.HA	GABA_neurons
ENSG00000236467	KCNMA1-AS1	-1.462	3.01736	0.00374977	0.0787808	3.AD/0.HA	GABA_neurons
ENSG00000138326	RPS24	-0.946826	5.90718	8.00435e-05	0.00660037	3.AD/0.HA	GABA_neurons
ENSG00000108179	PPIF	-2.07311	1.72608	0.0044014	0.0867521	3.AD/0.HA	GABA_neurons
ENSG00000165424	ZCCHC24	1.45214	3.53742	0.000257779	0.0141933	3.AD/0.HA	GABA_neurons
ENSG00000229458	AC010157.1	-1.58308	2.2751	0.0077115	0.121975	3.AD/0.HA	GABA_neurons
ENSG00000234942	GRID1-AS1	-3.16392	2.19952	3.12997e-06	0.000618259	3.AD/0.HA	GABA_neurons
ENSG00000122367	LDB3	1.20513	3.01001	0.00144543	0.0432605	3.AD/0.HA	GABA_neurons
ENSG00000173267	SNCG	-1.867	4.22416	4.45416e-05	0.00458123	3.AD/0.HA	GABA_neurons
ENSG00000223482	NUTM2A-AS1	0.856311	6.44382	0.0168667	0.18788	3.AD/0.HA	GABA_neurons
ENSG00000138119	MYOF	1.43396	2.39696	0.000621342	0.0257457	3.AD/0.HA	GABA_neurons
ENSG00000138207	RBP4	-1.99604	2.41687	0.00108562	0.0366413	3.AD/0.HA	GABA_neurons
ENSG00000280660	AL157396.1	0.543145	5.02269	0.00824544	0.12676	3.AD/0.HA	GABA_neurons
ENSG00000197430	OPALIN	0.996266	3.08211	0.0221461	0.219525	3.AD/0.HA	GABA_neurons
ENSG00000155629	PIK3AP1	1.66262	1.45631	0.00510425	0.0937244	3.AD/0.HA	GABA_neurons
ENSG00000171314	PGAM1	-1.67058	4.25514	1.13271e-06	0.000276195	3.AD/0.HA	GABA_neurons
ENSG00000155256	ZFYVE27	-0.598159	4.53083	0.0145734	0.175301	3.AD/0.HA	GABA_neurons
ENSG00000120053	GOT1	-0.550972	4.99776	0.0207689	0.211588	3.AD/0.HA	GABA_neurons
ENSG00000014919	COX15	-0.677388	4.13345	0.0211721	0.214602	3.AD/0.HA	GABA_neurons
ENSG00000235823	OLMALINC	1.34136	4.37724	5.25804e-05	0.00514678	3.AD/0.HA	GABA_neurons
ENSG00000166136	NDUFB8	-0.854757	5.38229	0.00185884	0.051035	3.AD/0.HA	GABA_neurons
ENSG00000055950	MRPL43	-1.59421	2.68184	0.00252039	0.0616021	3.AD/0.HA	GABA_neurons
ENSG00000198408	OGA	-0.380601	7.21121	0.0226594	0.222336	3.AD/0.HA	GABA_neurons
ENSG00000107872	FBXL15	-1.02335	2.77238	0.0221583	0.219525	3.AD/0.HA	GABA_neurons
ENSG00000138111	MFSD13A	-0.878486	2.95345	0.0203589	0.209068	3.AD/0.HA	GABA_neurons
ENSG00000173915	ATP5MD	-0.856	4.91383	0.0171942	0.190407	3.AD/0.HA	GABA_neurons
ENSG00000156395	SORCS3	0.804419	8.8156	0.00176856	0.0495511	3.AD/0.HA	GABA_neurons
ENSG00000108018	SORCS1	0.539036	8.80249	0.0227471	0.223002	3.AD/0.HA	GABA_neurons
ENSG00000273143	AL355512.1	3.22311	2.14733	4.74693e-05	0.00471482	3.AD/0.HA	GABA_neurons
ENSG00000203867	RBM20	1.17231	3.12735	0.00391087	0.0812062	3.AD/0.HA	GABA_neurons
ENSG00000043591	ADRB1	-1.74375	1.71535	0.025381	0.235962	3.AD/0.HA	GABA_neurons
ENSG00000285582	AC016042.1	-1.38448	5.0712	7.87595e-07	0.00022927	3.AD/0.HA	GABA_neurons
ENSG00000198873	GRK5	0.559034	6.38895	0.00347241	0.0750885	3.AD/0.HA	GABA_neurons
ENSG00000148908	RGS10	0.938965	3.11699	0.0172677	0.190575	3.AD/0.HA	GABA_neurons
ENSG00000066468	FGFR2	1.04661	5.34275	4.77774e-05	0.00472227	3.AD/0.HA	GABA_neurons
ENSG00000154478	GPR26	-2.23434	1.17505	0.025743	0.23677	3.AD/0.HA	GABA_neurons
ENSG00000182022	CHST15	0.691413	5.90983	0.0040053	0.0827272	3.AD/0.HA	GABA_neurons
ENSG00000189319	FAM53B	0.537415	5.25177	0.0228266	0.223196	3.AD/0.HA	GABA_neurons
ENSG00000175029	CTBP2	0.621365	5.37873	0.0139437	0.171125	3.AD/0.HA	GABA_neurons
ENSG00000188690	UROS	-0.624417	4.68904	0.0202034	0.208539	3.AD/0.HA	GABA_neurons
ENSG00000154493	C10orf90	1.69742	5.62984	8.73907e-08	4.7857e-05	3.AD/0.HA	GABA_neurons
ENSG00000150760	DOCK1	1.10195	5.45831	2.59389e-05	0.00305566	3.AD/0.HA	GABA_neurons
ENSG00000132334	PTPRE	1.05309	7.80176	3.6027e-08	2.43326e-05	3.AD/0.HA	GABA_neurons
ENSG00000231705	AL451069.2	1.97665	0.77338	0.00523212	0.0955073	3.AD/0.HA	GABA_neurons
ENSG00000130643	CALY	-1.18118	6.59704	0.000179472	0.0115443	3.AD/0.HA	GABA_neurons
ENSG00000142089	IFITM3	-1.81917	2.58483	0.0167637	0.187454	3.AD/0.HA	GABA_neurons
ENSG00000023191	RNH1	-0.901531	4.05518	0.00787425	0.123873	3.AD/0.HA	GABA_neurons
ENSG00000255158	AC131934.1	-1.56198	2.26067	0.00740361	0.118774	3.AD/0.HA	GABA_neurons
ENSG00000177042	TMEM80	-1.65952	2.29805	0.00434552	0.0861534	3.AD/0.HA	GABA_neurons
ENSG00000184524	CEND1	-0.678725	4.38498	0.0146563	0.175928	3.AD/0.HA	GABA_neurons
ENSG00000177600	RPLP2	-0.957002	5.29923	0.0084917	0.12869	3.AD/0.HA	GABA_neurons
ENSG00000177700	POLR2L	-1.14891	2.9831	0.0111318	0.151073	3.AD/0.HA	GABA_neurons
ENSG00000110651	CD81	-1.35109	4.78723	4.91918e-08	3.02037e-05	3.AD/0.HA	GABA_neurons
ENSG00000269821	KCNQ1OT1	0.501792	7.68862	0.0257352	0.23677	3.AD/0.HA	GABA_neurons
ENSG00000167323	STIM1	0.540991	6.4265	0.00455042	0.0883148	3.AD/0.HA	GABA_neurons
ENSG00000166333	ILK	-1.10253	3.21033	0.00295869	0.0678074	3.AD/0.HA	GABA_neurons
ENSG00000166337	TAF10	-1.09218	2.94328	0.00857189	0.129422	3.AD/0.HA	GABA_neurons
ENSG00000255159	AC026894.1	-2.42176	2.19795	0.000293034	0.0153423	3.AD/0.HA	GABA_neurons
ENSG00000184014	DENND5A	0.430794	6.55248	0.0188267	0.200772	3.AD/0.HA	GABA_neurons
ENSG00000255476	AC011092.2	-1.06959	3.14212	0.00326791	0.0725063	3.AD/0.HA	GABA_neurons
ENSG00000286561	AC011092.3	-1.71389	2.22664	0.00420851	0.084614	3.AD/0.HA	GABA_neurons
ENSG00000133805	AMPD3	0.942828	3.3167	0.00288349	0.0666955	3.AD/0.HA	GABA_neurons
ENSG00000255823	MTRNR2L8	1.8915	3.78497	0.000730877	0.0284242	3.AD/0.HA	GABA_neurons
ENSG00000110328	GALNT18	0.434726	7.99408	0.00938064	0.137433	3.AD/0.HA	GABA_neurons
ENSG00000110700	RPS13	-1.41592	4.79632	0.000367967	0.0179694	3.AD/0.HA	GABA_neurons
ENSG00000254966	AC103974.1	-1.50748	2.43239	0.00238449	0.0592818	3.AD/0.HA	GABA_neurons
ENSG00000007372	PAX6	1.41221	1.82964	0.0285009	0.249602	3.AD/0.HA	GABA_neurons
ENSG00000166016	ABTB2	1.27454	3.58628	6.56118e-05	0.00588242	3.AD/0.HA	GABA_neurons
ENSG00000179241	LDLRAD3	0.673722	4.93488	0.0019248	0.0520004	3.AD/0.HA	GABA_neurons
ENSG00000110442	COMMD9	-1.12473	3.22654	0.0041037	0.0835671	3.AD/0.HA	GABA_neurons
ENSG00000135362	PRR5L	2.00108	3.85874	6.4607e-06	0.00108187	3.AD/0.HA	GABA_neurons
ENSG00000148948	LRRC4C	0.512027	10.4972	0.0164948	0.18609	3.AD/0.HA	GABA_neurons
ENSG00000283217	AC068205.1	2.15655	1.24014	0.000994897	0.0343562	3.AD/0.HA	GABA_neurons
ENSG00000157570	TSPAN18	1.2353	3.34988	0.00495907	0.0924386	3.AD/0.HA	GABA_neurons
ENSG00000175274	TP53I11	0.848037	3.7507	0.0123062	0.15943	3.AD/0.HA	GABA_neurons
ENSG00000134569	LRP4	1.26983	2.94008	0.0136974	0.169023	3.AD/0.HA	GABA_neurons
ENSG00000134575	ACP2	-1.58494	2.39559	0.00582143	0.103016	3.AD/0.HA	GABA_neurons
ENSG00000213619	NDUFS3	-1.56402	2.85584	0.00145418	0.0433303	3.AD/0.HA	GABA_neurons
ENSG00000172247	C1QTNF4	-1.50842	2.91887	0.00309862	0.0700717	3.AD/0.HA	GABA_neurons
ENSG00000149177	PTPRJ	0.422762	7.66768	0.0261965	0.239419	3.AD/0.HA	GABA_neurons
ENSG00000086205	FOLH1	1.23823	4.11657	0.000605039	0.0253704	3.AD/0.HA	GABA_neurons
ENSG00000186907	RTN4RL2	-3.05314	1.13803	0.0043958	0.0867521	3.AD/0.HA	GABA_neurons
ENSG00000166793	YPEL4	-1.92041	2.62641	6.0811e-05	0.00562627	3.AD/0.HA	GABA_neurons
ENSG00000211450	SELENOH	-1.00592	4.38106	0.00124836	0.0396613	3.AD/0.HA	GABA_neurons
ENSG00000186509	OR9Q1	1.89641	0.717316	0.0183645	0.196879	3.AD/0.HA	GABA_neurons
ENSG00000255240	AP001636.3	1.39141	2.09592	0.0107564	0.147832	3.AD/0.HA	GABA_neurons
ENSG00000166902	MRPL16	-1.13937	2.88019	0.00795209	0.124517	3.AD/0.HA	GABA_neurons
ENSG00000166927	MS4A7	2.54536	1.16087	0.000482703	0.0219295	3.AD/0.HA	GABA_neurons
ENSG00000124920	MYRF	1.12943	2.97659	0.00493052	0.0920758	3.AD/0.HA	GABA_neurons
ENSG00000221968	FADS3	-0.836315	3.49776	0.0155079	0.179658	3.AD/0.HA	GABA_neurons
ENSG00000167996	FTH1	-0.999685	7.00707	0.00277229	0.0656216	3.AD/0.HA	GABA_neurons
ENSG00000254772	EEF1G	-0.857184	4.44424	0.0126013	0.16144	3.AD/0.HA	GABA_neurons
ENSG00000149541	B3GAT3	-0.838487	3.57596	0.0156009	0.180347	3.AD/0.HA	GABA_neurons
ENSG00000204922	UQCC3	-1.7245	2.06201	0.00743883	0.119151	3.AD/0.HA	GABA_neurons
ENSG00000168000	BSCL2	-0.466225	5.51331	0.025459	0.235962	3.AD/0.HA	GABA_neurons
ENSG00000162188	GNG3	-2.4438	3.52668	1.58704e-07	7.7405e-05	3.AD/0.HA	GABA_neurons
ENSG00000267811	AP001160.2	-4.99629	0.834716	0.00328245	0.0726874	3.AD/0.HA	GABA_neurons
ENSG00000197658	SLC22A24	-5.76331	1.47567	0.00723726	0.117313	3.AD/0.HA	GABA_neurons
ENSG00000184999	SLC22A10	-2.65898	4.34442	0.0058651	0.103518	3.AD/0.HA	GABA_neurons
ENSG00000196600	SLC22A25	-3.3092	1.39383	0.0182328	0.196175	3.AD/0.HA	GABA_neurons
ENSG00000176485	PLAAT3	0.979697	4.34017	0.00101909	0.0348798	3.AD/0.HA	GABA_neurons
ENSG00000176340	COX8A	-2.1325	3.77714	0.000248664	0.013842	3.AD/0.HA	GABA_neurons
ENSG00000167770	OTUB1	-0.946431	3.59106	0.00323435	0.071858	3.AD/0.HA	GABA_neurons
ENSG00000256824	AP000721.2	0.897282	4.38453	0.00279113	0.0659106	3.AD/0.HA	GABA_neurons
ENSG00000173511	VEGFB	-0.944907	3.40639	0.00919332	0.135769	3.AD/0.HA	GABA_neurons
ENSG00000173113	TRMT112	-1.6269	3.24618	0.000337941	0.016991	3.AD/0.HA	GABA_neurons
ENSG00000126432	PRDX5	-1.53545	3.64656	0.0178759	0.193691	3.AD/0.HA	GABA_neurons
ENSG00000237410	AP001092.1	-4.38058	0.51115	0.0278869	0.246532	3.AD/0.HA	GABA_neurons
ENSG00000168061	SAC3D1	-1.79319	1.52691	0.0217339	0.217892	3.AD/0.HA	GABA_neurons
ENSG00000149809	TM7SF2	-1.15465	3.18945	0.00708392	0.115793	3.AD/0.HA	GABA_neurons
ENSG00000149806	FAU	-1.11166	5.04211	0.00942959	0.137951	3.AD/0.HA	GABA_neurons
ENSG00000014216	CAPN1	-1.30427	3.34583	0.000248668	0.013842	3.AD/0.HA	GABA_neurons
ENSG00000245532	NEAT1	1.34564	8.79656	4.3123e-05	0.00450301	3.AD/0.HA	GABA_neurons
ENSG00000173465	ZNRD2	-2.22859	1.12738	0.0217789	0.217892	3.AD/0.HA	GABA_neurons
ENSG00000172977	KAT5	-1.09436	2.6833	0.0174369	0.19133	3.AD/0.HA	GABA_neurons
ENSG00000172757	CFL1	-1.1885	5.08158	5.37798e-05	0.00523887	3.AD/0.HA	GABA_neurons
ENSG00000175602	CCDC85B	-1.77716	3.68389	0.000101203	0.00768002	3.AD/0.HA	GABA_neurons
ENSG00000175550	DRAP1	-1.09121	3.26411	0.0143234	0.173369	3.AD/0.HA	GABA_neurons
ENSG00000175334	BANF1	-1.65437	3.11909	0.00120851	0.0391461	3.AD/0.HA	GABA_neurons
ENSG00000174684	B4GAT1	-2.32652	4.21383	8.08025e-07	0.00022927	3.AD/0.HA	GABA_neurons
ENSG00000174080	CTSF	-0.801461	3.6806	0.021787	0.217892	3.AD/0.HA	GABA_neurons
ENSG00000173120	KDM2A	0.468024	7.04155	0.0119395	0.156278	3.AD/0.HA	GABA_neurons
ENSG00000172531	PPP1CA	-1.1647	2.47724	0.016986	0.189001	3.AD/0.HA	GABA_neurons
ENSG00000172508	CARNS1	1.53907	2.70677	0.00760082	0.12079	3.AD/0.HA	GABA_neurons
ENSG00000172663	TMEM134	-1.13913	2.7882	0.00710761	0.115954	3.AD/0.HA	GABA_neurons
ENSG00000084207	GSTP1	-1.10043	3.59049	0.0165996	0.186696	3.AD/0.HA	GABA_neurons
ENSG00000167792	NDUFV1	-0.815534	4.73196	0.00827577	0.126937	3.AD/0.HA	GABA_neurons
ENSG00000110717	NDUFS8	-1.20168	3.80449	0.000819138	0.0301771	3.AD/0.HA	GABA_neurons
ENSG00000197345	MRPL21	-1.20377	2.95572	0.00342701	0.0747296	3.AD/0.HA	GABA_neurons
ENSG00000254604	AP002336.2	-0.790539	3.80826	0.00979467	0.140254	3.AD/0.HA	GABA_neurons
ENSG00000226627	SHANK2-AS1	-2.03575	1.6843	0.00759712	0.12079	3.AD/0.HA	GABA_neurons
ENSG00000149357	LAMTOR1	-0.948299	3.3477	0.0115145	0.153188	3.AD/0.HA	GABA_neurons
ENSG00000110200	ANAPC15	-1.40179	2.117	0.0197667	0.206025	3.AD/0.HA	GABA_neurons
ENSG00000175575	PAAF1	-0.556563	4.80821	0.0189484	0.201238	3.AD/0.HA	GABA_neurons
ENSG00000149380	P4HA3	-0.95959	3.01084	0.0229537	0.22388	3.AD/0.HA	GABA_neurons
ENSG00000165434	PGM2L1	-0.491275	6.16162	0.0190086	0.201439	3.AD/0.HA	GABA_neurons
ENSG00000255136	AP001972.3	-0.67392	4.41503	0.0141705	0.172443	3.AD/0.HA	GABA_neurons
ENSG00000149273	RPS3	-0.692614	5.32854	0.00478211	0.0906924	3.AD/0.HA	GABA_neurons
ENSG00000149257	SERPINH1	3.11821	0.823765	0.0117136	0.154585	3.AD/0.HA	GABA_neurons
ENSG00000137474	MYO7A	1.53997	1.91131	0.00708634	0.115793	3.AD/0.HA	GABA_neurons
ENSG00000254459	AP002812.2	-1.27146	3.45311	0.00077128	0.0292821	3.AD/0.HA	GABA_neurons
ENSG00000151366	NDUFC2	-1.23004	4.94682	0.00181751	0.0507395	3.AD/0.HA	GABA_neurons
ENSG00000287912	AP003464.1	-2.11502	2.88833	1.58508e-05	0.00216877	3.AD/0.HA	GABA_neurons
ENSG00000245832	MIR4300HG	1.5457	6.58356	0.000717021	0.0281228	3.AD/0.HA	GABA_neurons
ENSG00000255503	AP001767.3	-1.86846	1.80827	0.0148663	0.176716	3.AD/0.HA	GABA_neurons
ENSG00000165494	PCF11	0.450235	5.28979	0.0279377	0.246532	3.AD/0.HA	GABA_neurons
ENSG00000255311	AP002370.2	-0.770362	5.03854	0.0141418	0.172443	3.AD/0.HA	GABA_neurons
ENSG00000254787	AP001825.1	-0.698561	5.2982	0.00204848	0.0539484	3.AD/0.HA	GABA_neurons
ENSG00000073921	PICALM	0.374203	7.7074	0.0264088	0.240513	3.AD/0.HA	GABA_neurons
ENSG00000254733	AP001831.1	-0.74161	4.79171	0.0113571	0.152464	3.AD/0.HA	GABA_neurons
ENSG00000150687	PRSS23	-0.756625	4.15475	0.0125019	0.1606	3.AD/0.HA	GABA_neurons
ENSG00000255082	GRM5-AS1	-1.78847	4.32721	1.00134e-06	0.000255475	3.AD/0.HA	GABA_neurons
ENSG00000245552	AP000787.1	-1.29061	3.62586	0.000266914	0.0143454	3.AD/0.HA	GABA_neurons
ENSG00000087053	MTMR2	0.419502	5.60979	0.0286906	0.249974	3.AD/0.HA	GABA_neurons
ENSG00000184384	MAML2	0.702422	7.01773	0.0195323	0.204318	3.AD/0.HA	GABA_neurons
ENSG00000255467	AP002433.1	-3.05799	1.10525	0.00744554	0.119164	3.AD/0.HA	GABA_neurons
ENSG00000255028	AP003049.2	-2.45006	3.34397	1.6209e-08	1.42078e-05	3.AD/0.HA	GABA_neurons
ENSG00000185742	C11orf87	-0.809331	4.63723	0.000572994	0.0243396	3.AD/0.HA	GABA_neurons
ENSG00000149294	NCAM1	0.409242	9.49809	0.0262394	0.239704	3.AD/0.HA	GABA_neurons
ENSG00000166736	HTR3A	-1.30337	2.82683	0.0188722	0.201046	3.AD/0.HA	GABA_neurons
ENSG00000109906	ZBTB16	0.660606	8.11558	9.72118e-05	0.00751796	3.AD/0.HA	GABA_neurons
ENSG00000166741	NNMT	0.911883	4.50196	0.0152032	0.177857	3.AD/0.HA	GABA_neurons
ENSG00000255580	AP000462.1	-1.61145	4.00782	1.00869e-06	0.000255475	3.AD/0.HA	GABA_neurons
ENSG00000256315	AP000462.2	-2.65709	0.875216	0.0064383	0.109257	3.AD/0.HA	GABA_neurons
ENSG00000160584	SIK3	0.481127	8.70039	0.00557306	0.0996658	3.AD/0.HA	GABA_neurons
ENSG00000177103	DSCAML1	0.498702	8.77465	0.00654354	0.11058	3.AD/0.HA	GABA_neurons
ENSG00000118096	IFT46	-0.732325	3.67132	0.0138045	0.170161	3.AD/0.HA	GABA_neurons
ENSG00000019144	PHLDB1	0.69533	4.0582	0.0145288	0.17502	3.AD/0.HA	GABA_neurons
ENSG00000118181	RPS25	-1.44622	5.43159	9.27249e-07	0.00024721	3.AD/0.HA	GABA_neurons
ENSG00000149428	HYOU1	-0.945579	3.0509	0.0218384	0.21819	3.AD/0.HA	GABA_neurons
ENSG00000172269	DPAGT1	-1.77519	1.52027	0.0151511	0.177827	3.AD/0.HA	GABA_neurons
ENSG00000154096	THY1	-1.21792	5.53231	0.000171618	0.0111097	3.AD/0.HA	GABA_neurons
ENSG00000109929	SC5D	-0.589872	4.88515	0.013212	0.165964	3.AD/0.HA	GABA_neurons
ENSG00000154127	UBASH3B	0.422365	7.59743	0.0212112	0.214676	3.AD/0.HA	GABA_neurons
ENSG00000109971	HSPA8	-0.866979	5.15839	0.00312075	0.0704823	3.AD/0.HA	GABA_neurons
ENSG00000110013	SIAE	-0.939096	3.25935	0.0259139	0.237802	3.AD/0.HA	GABA_neurons
ENSG00000154146	NRGN	-2.46117	3.83582	0.0239942	0.229001	3.AD/0.HA	GABA_neurons
ENSG00000165478	HEPACAM	1.45616	3.09967	3.50642e-05	0.00381973	3.AD/0.HA	GABA_neurons
ENSG00000165526	RPUSD4	-0.899493	3.06105	0.0229028	0.223617	3.AD/0.HA	GABA_neurons
ENSG00000182934	SRPRA	-1.00975	3.27108	0.0134561	0.168301	3.AD/0.HA	GABA_neurons
ENSG00000134954	ETS1	0.794081	4.66304	0.00392205	0.0813395	3.AD/0.HA	GABA_neurons
ENSG00000151702	FLI1	1.91884	2.54364	6.3869e-06	0.00108101	3.AD/0.HA	GABA_neurons
ENSG00000182667	NTM	0.876517	9.54033	0.00011394	0.00825378	3.AD/0.HA	GABA_neurons
ENSG00000255371	OPCML-IT2	2.30987	0.707811	0.00738924	0.118732	3.AD/0.HA	GABA_neurons
ENSG00000166086	JAM3	0.571612	6.33156	0.00539732	0.0973825	3.AD/0.HA	GABA_neurons
ENSG00000171840	NINJ2	1.39966	2.8219	0.00657355	0.11081	3.AD/0.HA	GABA_neurons
ENSG00000006831	ADIPOR2	0.671765	5.96557	0.000352875	0.0175669	3.AD/0.HA	GABA_neurons
ENSG00000151067	CACNA1C	0.386397	9.45629	0.0282848	0.248345	3.AD/0.HA	GABA_neurons
ENSG00000285734	AC005414.1	-2.66045	0.881059	0.0202507	0.208708	3.AD/0.HA	GABA_neurons
ENSG00000215039	CD27-AS1	-0.970835	2.96293	0.0145695	0.175301	3.AD/0.HA	GABA_neurons
ENSG00000111639	MRPL51	-1.99666	2.67023	0.000526313	0.0232899	3.AD/0.HA	GABA_neurons
ENSG00000111640	GAPDH	-1.34603	6.61152	8.22419e-07	0.00022927	3.AD/0.HA	GABA_neurons
ENSG00000247853	AC006064.2	-2.92008	1.03642	0.0146548	0.175928	3.AD/0.HA	GABA_neurons
ENSG00000111664	GNB3	-1.38766	2.12997	0.0249082	0.234243	3.AD/0.HA	GABA_neurons
ENSG00000111669	TPI1	-1.30565	4.36869	0.000717573	0.0281228	3.AD/0.HA	GABA_neurons
ENSG00000111674	ENO2	-1.17092	5.41257	0.000118194	0.00849235	3.AD/0.HA	GABA_neurons
ENSG00000111678	C12orf57	-1.72827	3.39959	0.000109228	0.00804793	3.AD/0.HA	GABA_neurons
ENSG00000126838	PZP	-1.43228	2.60015	0.00458923	0.0888128	3.AD/0.HA	GABA_neurons
ENSG00000284634	AC092821.3	-0.651108	4.39051	0.028102	0.247567	3.AD/0.HA	GABA_neurons
ENSG00000139112	GABARAPL1	-0.861748	4.51719	0.0021447	0.0550773	3.AD/0.HA	GABA_neurons
ENSG00000256537	SMIM10L1	-1.18605	3.58346	0.00112018	0.0374539	3.AD/0.HA	GABA_neurons
ENSG00000121380	BCL2L14	-1.2381	3.98371	0.00128351	0.0401955	3.AD/0.HA	GABA_neurons
ENSG00000205791	LOH12CR2	-2.94666	1.07143	0.0178377	0.193581	3.AD/0.HA	GABA_neurons
ENSG00000111266	DUSP16	0.724626	4.85668	0.00120794	0.0391461	3.AD/0.HA	GABA_neurons
ENSG00000178878	APOLD1	1.37109	4.13977	2.75228e-05	0.00313296	3.AD/0.HA	GABA_neurons
ENSG00000111305	GSG1	-4.02226	0.360743	0.0275021	0.245199	3.AD/0.HA	GABA_neurons
ENSG00000273079	GRIN2B	0.413898	9.77577	0.0167271	0.187454	3.AD/0.HA	GABA_neurons
ENSG00000287928	AC007535.1	-1.2318	2.53879	0.0127333	0.162675	3.AD/0.HA	GABA_neurons
ENSG00000008394	MGST1	-1.04956	4.31701	0.000601486	0.0253011	3.AD/0.HA	GABA_neurons
ENSG00000255910	AC024901.1	-0.602312	7.40247	0.00292031	0.0673076	3.AD/0.HA	GABA_neurons
ENSG00000084453	SLCO1A2	1.77775	4.56139	5.45716e-05	0.00526538	3.AD/0.HA	GABA_neurons
ENSG00000111711	GOLT1B	-0.770035	5.4255	0.00160129	0.0465501	3.AD/0.HA	GABA_neurons
ENSG00000111713	GYS2	1.06499	2.23605	0.0128689	0.163685	3.AD/0.HA	GABA_neurons
ENSG00000111716	LDHB	-0.608349	5.52511	0.0157196	0.180572	3.AD/0.HA	GABA_neurons
ENSG00000111726	CMAS	-0.602847	4.81669	0.0115014	0.153188	3.AD/0.HA	GABA_neurons
ENSG00000250166	AC053513.1	-1.57963	5.64087	2.2779e-10	4.61547e-07	3.AD/0.HA	GABA_neurons
ENSG00000256995	AC084816.1	-2.32095	3.67091	0.0185341	0.198487	3.AD/0.HA	GABA_neurons
ENSG00000118308	LRMP	-1.92988	3.31977	0.0118364	0.155525	3.AD/0.HA	GABA_neurons
ENSG00000123104	ITPR2	1.06598	6.53027	3.76157e-07	0.000131408	3.AD/0.HA	GABA_neurons
ENSG00000247903	AC024896.1	-3.9915	0.33053	0.0236011	0.227361	3.AD/0.HA	GABA_neurons
ENSG00000256226	AC092747.1	-2.48501	0.778302	0.0197027	0.205569	3.AD/0.HA	GABA_neurons
ENSG00000064763	FAR2	0.5004	7.53424	0.0130213	0.164488	3.AD/0.HA	GABA_neurons
ENSG00000174718	RESF1	0.498565	5.52454	0.0189551	0.201238	3.AD/0.HA	GABA_neurons
ENSG00000139132	FGD4	0.438137	6.23354	0.0287163	0.249974	3.AD/0.HA	GABA_neurons
ENSG00000139117	CPNE8	-0.73445	6.64983	0.00243741	0.0603323	3.AD/0.HA	GABA_neurons
ENSG00000180116	C12orf40	-0.747604	4.94537	0.00285731	0.0665911	3.AD/0.HA	GABA_neurons
ENSG00000257228	AC090531.1	-2.78235	1.91924	0.000370658	0.0180102	3.AD/0.HA	GABA_neurons
ENSG00000257319	AC008127.1	-2.24729	2.08193	0.00140979	0.0426345	3.AD/0.HA	GABA_neurons
ENSG00000189079	ARID2	0.425841	6.29883	0.0227493	0.223002	3.AD/0.HA	GABA_neurons
ENSG00000139209	SLC38A4	-1.59747	2.23903	0.0236304	0.227361	3.AD/0.HA	GABA_neurons
ENSG00000152556	PFKM	-0.631328	4.15436	0.0208627	0.212209	3.AD/0.HA	GABA_neurons
ENSG00000134287	ARF3	-0.630689	4.69061	0.0223942	0.220696	3.AD/0.HA	GABA_neurons
ENSG00000123416	TUBA1B	-1.66432	5.76187	0.00128088	0.0401751	3.AD/0.HA	GABA_neurons
ENSG00000258017	AC011603.2	0.444893	5.39305	0.0278562	0.246532	3.AD/0.HA	GABA_neurons
ENSG00000167552	TUBA1A	-0.714767	5.56351	0.00282222	0.0661849	3.AD/0.HA	GABA_neurons
ENSG00000161791	FMNL3	0.771544	3.95097	0.0070398	0.115793	3.AD/0.HA	GABA_neurons
ENSG00000178449	COX14	-1.36349	3.08432	0.00430545	0.0857788	3.AD/0.HA	GABA_neurons
ENSG00000066084	DIP2B	0.435702	7.97632	0.0135545	0.168945	3.AD/0.HA	GABA_neurons
ENSG00000185432	METTL7A	1.23142	2.94456	0.000708167	0.0281228	3.AD/0.HA	GABA_neurons
ENSG00000050438	SLC4A8	0.482361	6.19033	0.012371	0.159758	3.AD/0.HA	GABA_neurons
ENSG00000167778	SPRYD3	-1.22406	3.09659	0.011249	0.151952	3.AD/0.HA	GABA_neurons
ENSG00000123349	PFDN5	-1.53963	4.38312	7.00748e-05	0.00601634	3.AD/0.HA	GABA_neurons
ENSG00000094914	AAAS	-1.16026	2.40009	0.0162522	0.184587	3.AD/0.HA	GABA_neurons
ENSG00000285692	AC023509.6	-1.0543	3.33872	0.0042094	0.084614	3.AD/0.HA	GABA_neurons
ENSG00000135390	ATP5MC2	-0.820295	4.89176	0.000733833	0.028483	3.AD/0.HA	GABA_neurons
ENSG00000257596	SCAT2	-1.84375	1.27017	0.0148024	0.176227	3.AD/0.HA	GABA_neurons
ENSG00000258344	AC078778.1	1.67256	1.00185	0.00918665	0.135769	3.AD/0.HA	GABA_neurons
ENSG00000135486	HNRNPA1	-0.743749	4.56953	0.00934045	0.137242	3.AD/0.HA	GABA_neurons
ENSG00000135441	BLOC1S1	-1.53498	3.19201	6.15571e-05	0.00566941	3.AD/0.HA	GABA_neurons
ENSG00000135404	CD63	-1.05554	4.42556	0.00162176	0.0468192	3.AD/0.HA	GABA_neurons
ENSG00000135414	GDF11	0.919029	3.25889	0.00406277	0.0829836	3.AD/0.HA	GABA_neurons
ENSG00000065361	ERBB3	1.89488	2.96312	3.61751e-06	0.000673032	3.AD/0.HA	GABA_neurons
ENSG00000229117	RPL41	-1.58171	5.60891	1.14929e-07	5.97101e-05	3.AD/0.HA	GABA_neurons
ENSG00000196465	MYL6B	-1.12806	4.31057	0.000108585	0.00804793	3.AD/0.HA	GABA_neurons
ENSG00000092841	MYL6	-0.949178	4.27975	0.00132345	0.0410027	3.AD/0.HA	GABA_neurons
ENSG00000135469	COQ10A	-1.57947	1.60687	0.020882	0.212298	3.AD/0.HA	GABA_neurons
ENSG00000257342	AC025165.2	-1.42997	2.00466	0.0214068	0.216103	3.AD/0.HA	GABA_neurons
ENSG00000139266	MARCH9	-1.35849	2.80426	0.00372993	0.0786428	3.AD/0.HA	GABA_neurons
ENSG00000286279	AC108721.2	2.07588	3.10728	0.000299073	0.0155479	3.AD/0.HA	GABA_neurons
ENSG00000255886	AC020611.2	-2.28041	2.08663	0.00112912	0.0376286	3.AD/0.HA	GABA_neurons
ENSG00000153179	RASSF3	0.75273	3.97522	0.0129346	0.16381	3.AD/0.HA	GABA_neurons
ENSG00000248995	LINC02231	-0.964421	3.22491	0.0263946	0.240513	3.AD/0.HA	GABA_neurons
ENSG00000174099	MSRB3	0.506671	5.93126	0.00423418	0.0850277	3.AD/0.HA	GABA_neurons
ENSG00000135678	CPM	1.98406	3.67857	1.40884e-07	7.13646e-05	3.AD/0.HA	GABA_neurons
ENSG00000139292	LGR5	1.30858	3.7683	1.01255e-05	0.00153107	3.AD/0.HA	GABA_neurons
ENSG00000258123	LINC02444	-4.5248	0.672134	0.0272658	0.244433	3.AD/0.HA	GABA_neurons
ENSG00000251138	AC090015.1	1.48492	4.59008	0.0126048	0.16144	3.AD/0.HA	GABA_neurons
ENSG00000253719	ATXN7L3B	-0.811524	4.58738	0.00331766	0.0731474	3.AD/0.HA	GABA_neurons
ENSG00000257434	AC073525.1	-1.76627	3.81289	4.73969e-05	0.00471482	3.AD/0.HA	GABA_neurons
ENSG00000257191	AC090709.1	-0.945269	5.54701	0.000793321	0.0296573	3.AD/0.HA	GABA_neurons
ENSG00000257894	AC027288.3	-0.670264	6.56094	0.00199719	0.0531636	3.AD/0.HA	GABA_neurons
ENSG00000257467	PPFIA2-AS1	-2.55003	3.68986	2.83353e-09	4.35779e-06	3.AD/0.HA	GABA_neurons
ENSG00000258162	AC069228.1	-1.10511	5.44713	5.54835e-05	0.00528429	3.AD/0.HA	GABA_neurons
ENSG00000257747	LINC02426	-2.31588	1.22418	0.0147237	0.176044	3.AD/0.HA	GABA_neurons
ENSG00000179104	TMTC2	0.521318	8.87558	0.00431697	0.0859026	3.AD/0.HA	GABA_neurons
ENSG00000271614	ATP2B1-AS1	-1.0308	3.05513	0.0215823	0.217044	3.AD/0.HA	GABA_neurons
ENSG00000139329	LUM	-4.50314	0.54168	0.0286145	0.249974	3.AD/0.HA	GABA_neurons
ENSG00000011465	DCN	-1.90457	3.83431	0.000215259	0.0126057	3.AD/0.HA	GABA_neurons
ENSG00000133639	BTG1	-0.911966	4.34153	0.0024453	0.0603323	3.AD/0.HA	GABA_neurons
ENSG00000169372	CRADD	0.739521	7.42588	0.000158601	0.0104337	3.AD/0.HA	GABA_neurons
ENSG00000184752	NDUFA12	-0.781811	4.74368	0.0214162	0.216103	3.AD/0.HA	GABA_neurons
ENSG00000257458	AC069437.1	-0.939685	4.31025	0.00124613	0.0396613	3.AD/0.HA	GABA_neurons
ENSG00000258039	AC117377.1	-2.22769	1.15944	0.00758563	0.12079	3.AD/0.HA	GABA_neurons
ENSG00000075089	ACTR6	-0.668311	4.61407	0.00652133	0.110296	3.AD/0.HA	GABA_neurons
ENSG00000166153	DEPDC4	-1.18001	2.30687	0.0178192	0.193528	3.AD/0.HA	GABA_neurons
ENSG00000012504	NR1H4	2.01413	3.00592	3.37152e-07	0.000119849	3.AD/0.HA	GABA_neurons
ENSG00000151572	ANO4	0.606032	9.12566	0.00186847	0.051136	3.AD/0.HA	GABA_neurons
ENSG00000281344	HELLPAR	-0.960008	3.34057	0.00982548	0.140398	3.AD/0.HA	GABA_neurons
ENSG00000171759	PAH	-1.28863	3.47077	0.0018195	0.0507395	3.AD/0.HA	GABA_neurons
ENSG00000139372	TDG	-0.515632	4.70581	0.0222103	0.219525	3.AD/0.HA	GABA_neurons
ENSG00000260329	AC007541.1	-1.91127	1.2995	0.0263723	0.240484	3.AD/0.HA	GABA_neurons
ENSG00000008405	CRY1	0.660292	5.2389	0.0021285	0.0549254	3.AD/0.HA	GABA_neurons
ENSG00000257548	AC078929.1	2.64554	0.566145	0.0111909	0.151376	3.AD/0.HA	GABA_neurons
ENSG00000287202	AC008119.1	-1.77929	1.54571	0.0256703	0.236502	3.AD/0.HA	GABA_neurons
ENSG00000136003	ISCU	-1.24968	4.31127	0.00019582	0.011987	3.AD/0.HA	GABA_neurons
ENSG00000139438	FAM222A	0.987344	3.78921	0.00165463	0.0472864	3.AD/0.HA	GABA_neurons
ENSG00000139437	TCHP	-0.613177	5.1791	0.00794716	0.124517	3.AD/0.HA	GABA_neurons
ENSG00000234608	MAPKAPK5-AS1	-1.21202	2.96772	0.00766421	0.121607	3.AD/0.HA	GABA_neurons
ENSG00000089248	ERP29	-1.2633	3.47972	0.00545909	0.0982345	3.AD/0.HA	GABA_neurons
ENSG00000089009	RPL6	-1.47825	5.77647	2.9985e-08	2.16985e-05	3.AD/0.HA	GABA_neurons
ENSG00000089220	PEBP1	-0.914866	6.52107	0.00644734	0.109319	3.AD/0.HA	GABA_neurons
ENSG00000135090	TAOK3	0.459836	7.35685	0.0135299	0.168911	3.AD/0.HA	GABA_neurons
ENSG00000257095	AC084361.1	-0.970806	3.80799	0.00429432	0.0856412	3.AD/0.HA	GABA_neurons
ENSG00000255692	AC002563.1	-2.68132	1.47174	0.00913727	0.1354	3.AD/0.HA	GABA_neurons
ENSG00000277283	AC004812.2	-2.03216	1.69113	0.0084239	0.128238	3.AD/0.HA	GABA_neurons
ENSG00000089157	RPLP0	-1.43388	4.51776	0.000120559	0.00860128	3.AD/0.HA	GABA_neurons
ENSG00000111775	COX6A1	-1.35811	4.90339	0.000431995	0.020122	3.AD/0.HA	GABA_neurons
ENSG00000111786	SRSF9	-0.888818	3.74435	0.0102324	0.143117	3.AD/0.HA	GABA_neurons
ENSG00000088986	DYNLL1	-1.2458	5.65806	0.00022954	0.0132505	3.AD/0.HA	GABA_neurons
ENSG00000257097	CLIP1-AS1	-4.05905	0.344688	0.0268683	0.242402	3.AD/0.HA	GABA_neurons
ENSG00000033030	ZCCHC8	0.491429	5.07875	0.0254214	0.235962	3.AD/0.HA	GABA_neurons
ENSG00000182196	ARL6IP4	-1.32657	3.88906	0.000188581	0.0118375	3.AD/0.HA	GABA_neurons
ENSG00000179195	ZNF664	-0.997388	3.22173	0.0159021	0.181936	3.AD/0.HA	GABA_neurons
ENSG00000196498	NCOR2	0.461195	6.22484	0.00854944	0.129245	3.AD/0.HA	GABA_neurons
ENSG00000150991	UBC	-0.869664	5.12217	0.00591654	0.103729	3.AD/0.HA	GABA_neurons
ENSG00000181234	TMEM132C	0.573855	6.95048	0.0103748	0.144677	3.AD/0.HA	GABA_neurons
ENSG00000151952	TMEM132D	0.697144	9.46445	0.00473491	0.0905344	3.AD/0.HA	GABA_neurons
ENSG00000232243	AL139327.2	-4.96327	0.888344	0.0254343	0.235962	3.AD/0.HA	GABA_neurons
ENSG00000150457	LATS2	1.7728	1.8079	0.000284792	0.0150272	3.AD/0.HA	GABA_neurons
ENSG00000150459	SAP18	-1.154	4.21387	0.0014797	0.043833	3.AD/0.HA	GABA_neurons
ENSG00000173141	MRPL57	-1.33862	4.06798	0.000769917	0.0292821	3.AD/0.HA	GABA_neurons
ENSG00000182957	SPATA13	0.672168	5.63719	0.00416039	0.0842136	3.AD/0.HA	GABA_neurons
ENSG00000165566	AMER2	0.98569	5.03487	3.43462e-06	0.000650396	3.AD/0.HA	GABA_neurons
ENSG00000132964	CDK8	0.442072	7.87624	0.0116591	0.1541	3.AD/0.HA	GABA_neurons
ENSG00000237001	WASF3-AS1	-2.99022	1.66654	0.000190456	0.0118375	3.AD/0.HA	GABA_neurons
ENSG00000275294	LINC02340	-1.42151	3.21296	0.00097669	0.0340837	3.AD/0.HA	GABA_neurons
ENSG00000122026	RPL21	-0.876099	5.4781	0.0279333	0.246532	3.AD/0.HA	GABA_neurons
ENSG00000122034	GTF3A	-0.682109	4.42698	0.00701985	0.115733	3.AD/0.HA	GABA_neurons
ENSG00000186184	POLR1D	-0.50708	4.87754	0.0257186	0.236761	3.AD/0.HA	GABA_neurons
ENSG00000132963	POMP	-0.691072	4.52374	0.0109389	0.14948	3.AD/0.HA	GABA_neurons
ENSG00000133121	STARD13	0.463416	7.73484	0.0165416	0.186432	3.AD/0.HA	GABA_neurons
ENSG00000236581	STARD13-AS	-0.911154	3.54308	0.00607646	0.105142	3.AD/0.HA	GABA_neurons
ENSG00000271850	LINC02343	-1.67651	2.02162	0.0046376	0.0891618	3.AD/0.HA	GABA_neurons
ENSG00000150893	FREM2	1.20509	5.5706	0.00921676	0.135849	3.AD/0.HA	GABA_neurons
ENSG00000120690	ELF1	0.952938	4.61197	0.00140816	0.0426345	3.AD/0.HA	GABA_neurons
ENSG00000102760	RGCC	1.10382	3.23999	0.00327069	0.0725063	3.AD/0.HA	GABA_neurons
ENSG00000120658	ENOX1	0.707329	9.35669	8.554e-05	0.00689612	3.AD/0.HA	GABA_neurons
ENSG00000151773	CCDC122	0.836084	4.04703	0.0136729	0.169023	3.AD/0.HA	GABA_neurons
ENSG00000233725	NRAD1	0.938149	2.45603	0.0263408	0.240305	3.AD/0.HA	GABA_neurons
ENSG00000276527	AL356515.1	-2.14816	1.11244	0.0194886	0.204177	3.AD/0.HA	GABA_neurons
ENSG00000223732	AL359706.1	-1.40058	3.19521	0.000431114	0.020122	3.AD/0.HA	GABA_neurons
ENSG00000133112	TPT1	-0.828665	5.73396	0.0106812	0.147427	3.AD/0.HA	GABA_neurons
ENSG00000235903	CPB2-AS1	0.602067	5.67282	0.0202878	0.208873	3.AD/0.HA	GABA_neurons
ENSG00000173988	LRRC63	1.40399	4.06	7.48134e-05	0.00634255	3.AD/0.HA	GABA_neurons
ENSG00000136156	ITM2B	-0.75367	7.2843	0.000506692	0.0226635	3.AD/0.HA	GABA_neurons
ENSG00000139687	RB1	0.39918	6.89437	0.0220365	0.219293	3.AD/0.HA	GABA_neurons
ENSG00000139679	LPAR6	-1.26483	2.99101	0.00597391	0.103989	3.AD/0.HA	GABA_neurons
ENSG00000136144	RCBTB1	0.780916	4.33272	0.00136564	0.0418273	3.AD/0.HA	GABA_neurons
ENSG00000150510	FAM124A	1.00732	4.74413	0.00086081	0.0312017	3.AD/0.HA	GABA_neurons
ENSG00000273723	AL139089.1	-2.26256	1.17975	0.0182408	0.196175	3.AD/0.HA	GABA_neurons
ENSG00000278630	LINC02335	-3.11989	1.14726	0.0107444	0.147796	3.AD/0.HA	GABA_neurons
ENSG00000288015	AL159156.1	-4.0157	0.359521	0.0269649	0.242936	3.AD/0.HA	GABA_neurons
ENSG00000139734	DIAPH3	-2.26749	3.5103	3.31197e-06	0.000633085	3.AD/0.HA	GABA_neurons
ENSG00000280165	PCDH20	-1.018	2.97764	0.0195305	0.204318	3.AD/0.HA	GABA_neurons
ENSG00000234527	PCDH9-AS1	-3.17348	1.15137	0.00202954	0.0537308	3.AD/0.HA	GABA_neurons
ENSG00000228842	PCDH9-AS2	-1.07629	5.51421	1.85313e-07	8.42843e-05	3.AD/0.HA	GABA_neurons
ENSG00000285588	AL160254.1	-0.81571	4.26713	0.00363642	0.077153	3.AD/0.HA	GABA_neurons
ENSG00000261105	LMO7-AS1	-1.31304	2.89344	0.00225926	0.0569366	3.AD/0.HA	GABA_neurons
ENSG00000236051	MYCBP2-AS1	-1.42171	5.25622	0.000511132	0.0228118	3.AD/0.HA	GABA_neurons
ENSG00000136158	SPRY2	-0.840971	3.74777	0.00997796	0.141269	3.AD/0.HA	GABA_neurons
ENSG00000287159	AL356737.2	-4.88022	0.826084	0.0174395	0.19133	3.AD/0.HA	GABA_neurons
ENSG00000125257	ABCC4	0.519002	4.88305	0.022037	0.219293	3.AD/0.HA	GABA_neurons
ENSG00000185352	HS6ST3	0.61934	9.22905	0.0027139	0.064617	3.AD/0.HA	GABA_neurons
ENSG00000088387	DOCK9	0.445899	8.3876	0.0156214	0.180347	3.AD/0.HA	GABA_neurons
ENSG00000125247	TMTC4	1.02452	4.26622	0.000543648	0.023487	3.AD/0.HA	GABA_neurons
ENSG00000198542	ITGBL1	1.27127	3.67881	0.00199207	0.0531636	3.AD/0.HA	GABA_neurons
ENSG00000151287	TEX30	-1.17619	2.32292	0.0249337	0.234326	3.AD/0.HA	GABA_neurons
ENSG00000272274	LINC00551	-1.33923	4.08441	0.000705012	0.0281228	3.AD/0.HA	GABA_neurons
ENSG00000204442	FAM155A	0.478283	11.4898	0.0253642	0.235962	3.AD/0.HA	GABA_neurons
ENSG00000227248	FAM155A-IT1	1.14075	2.81839	0.00595823	0.103975	3.AD/0.HA	GABA_neurons
ENSG00000285534	AL163541.1	1.54009	4.06867	0.00176437	0.0495511	3.AD/0.HA	GABA_neurons
ENSG00000275830	AL390755.1	1.58449	2.24372	0.0113443	0.152464	3.AD/0.HA	GABA_neurons
ENSG00000204398	AL359649.1	0.896555	2.76261	0.0239575	0.228759	3.AD/0.HA	GABA_neurons
ENSG00000068650	ATP11A	0.522489	6.07143	0.00365611	0.0774896	3.AD/0.HA	GABA_neurons
ENSG00000126217	MCF2L	0.527037	6.46348	0.0037499	0.0787808	3.AD/0.HA	GABA_neurons
ENSG00000185989	RASA3	0.646049	5.05262	0.0119993	0.156555	3.AD/0.HA	GABA_neurons
ENSG00000259001	AL355075.4	2.11745	2.9783	8.44032e-07	0.000231105	3.AD/0.HA	GABA_neurons
ENSG00000092094	OSGEP	-0.894725	4.68225	0.00279426	0.0659106	3.AD/0.HA	GABA_neurons
ENSG00000100823	APEX1	-1.34116	3.19721	0.00390965	0.0812062	3.AD/0.HA	GABA_neurons
ENSG00000165782	PIP4P1	-1.31875	2.62016	0.0236274	0.227361	3.AD/0.HA	GABA_neurons
ENSG00000165801	ARHGEF40	0.863183	3.11995	0.0104825	0.145577	3.AD/0.HA	GABA_neurons
ENSG00000092203	TOX4	-0.754651	4.37104	0.0066743	0.111949	3.AD/0.HA	GABA_neurons
ENSG00000100836	PABPN1	-0.559241	5.58923	0.00497972	0.092656	3.AD/0.HA	GABA_neurons
ENSG00000092096	SLC22A17	-0.830294	5.65434	0.0025684	0.0624741	3.AD/0.HA	GABA_neurons
ENSG00000100842	EFS	2.00107	1.19123	0.0147504	0.176075	3.AD/0.HA	GABA_neurons
ENSG00000100884	CPNE6	-0.768049	3.48562	0.0209174	0.212551	3.AD/0.HA	GABA_neurons
ENSG00000092010	PSME1	-1.58367	1.8227	0.0153664	0.178734	3.AD/0.HA	GABA_neurons
ENSG00000129559	NEDD8	-0.838097	4.71601	0.00147159	0.0436566	3.AD/0.HA	GABA_neurons
ENSG00000100852	ARHGAP5	0.511516	7.51904	0.00585087	0.103357	3.AD/0.HA	GABA_neurons
ENSG00000258580	AL136298.1	-1.90282	3.26764	3.14286e-06	0.000618259	3.AD/0.HA	GABA_neurons
ENSG00000151322	NPAS3	0.865079	11.5279	0.000314886	0.0161284	3.AD/0.HA	GABA_neurons
ENSG00000258342	AL133304.3	0.850393	4.2705	0.00492113	0.0919851	3.AD/0.HA	GABA_neurons
ENSG00000257585	LINC00609	1.34197	6.17283	2.58372e-07	0.00010265	3.AD/0.HA	GABA_neurons
ENSG00000258844	AL162511.1	1.52203	2.40256	0.0102347	0.143117	3.AD/0.HA	GABA_neurons
ENSG00000139865	TTC6	-1.42674	2.11992	0.0164339	0.185713	3.AD/0.HA	GABA_neurons
ENSG00000259070	LINC00639	1.80321	4.33925	7.38622e-05	0.00628822	3.AD/0.HA	GABA_neurons
ENSG00000251363	LINC02315	1.46301	4.95162	0.000189787	0.0118375	3.AD/0.HA	GABA_neurons
ENSG00000258636	AL121821.2	-1.34913	2.54472	0.0141436	0.172443	3.AD/0.HA	GABA_neurons
ENSG00000139915	MDGA2	0.524009	10.4843	0.0129971	0.164488	3.AD/0.HA	GABA_neurons
ENSG00000213741	RPS29	-0.741308	5.7304	0.00206283	0.0540016	3.AD/0.HA	GABA_neurons
ENSG00000165502	RPL36AL	-1.22475	3.82929	0.0172063	0.190407	3.AD/0.HA	GABA_neurons
ENSG00000165516	KLHDC2	-0.567127	4.94731	0.0274522	0.245199	3.AD/0.HA	GABA_neurons
ENSG00000100490	CDKL1	0.628845	6.11993	0.000570817	0.0243396	3.AD/0.HA	GABA_neurons
ENSG00000087303	NID2	-1.62198	2.27561	0.00344973	0.0749983	3.AD/0.HA	GABA_neurons
ENSG00000258731	AL356020.1	-2.58844	0.836306	0.0109731	0.149768	3.AD/0.HA	GABA_neurons
ENSG00000020577	SAMD4A	0.435914	7.79571	0.0190386	0.201547	3.AD/0.HA	GABA_neurons
ENSG00000131979	GCH1	0.787806	3.10533	0.0167483	0.187454	3.AD/0.HA	GABA_neurons
ENSG00000139946	PELI2	0.884814	6.08438	0.000414274	0.0196581	3.AD/0.HA	GABA_neurons
ENSG00000151812	SLC35F4	0.742584	7.69603	0.000132051	0.00916304	3.AD/0.HA	GABA_neurons
ENSG00000100567	PSMA3	-0.633405	4.57897	0.00999105	0.141269	3.AD/0.HA	GABA_neurons
ENSG00000181619	GPR135	0.446556	6.31231	0.0221057	0.219509	3.AD/0.HA	GABA_neurons
ENSG00000050130	JKAMP	-0.634917	5.0356	0.0091416	0.1354	3.AD/0.HA	GABA_neurons
ENSG00000100612	DHRS7	-0.73844	3.84303	0.0169303	0.188484	3.AD/0.HA	GABA_neurons
ENSG00000054690	PLEKHH1	0.995801	5.43145	0.000101094	0.00768002	3.AD/0.HA	GABA_neurons
ENSG00000182185	RAD51B	0.619497	6.03616	0.00184814	0.05081	3.AD/0.HA	GABA_neurons
ENSG00000258957	AL359317.2	-0.89854	3.13445	0.0214638	0.216475	3.AD/0.HA	GABA_neurons
ENSG00000100632	ERH	-0.753053	3.89838	0.0166022	0.186696	3.AD/0.HA	GABA_neurons
ENSG00000198732	SMOC1	1.26412	5.18562	8.53761e-06	0.00137293	3.AD/0.HA	GABA_neurons
ENSG00000100678	SLC8A3	0.527127	6.87799	0.00302617	0.0689127	3.AD/0.HA	GABA_neurons
ENSG00000259033	AL356804.1	-2.12633	1.76645	0.0048519	0.0912005	3.AD/0.HA	GABA_neurons
ENSG00000182732	RGS6	0.932571	8.38579	2.17839e-05	0.00272461	3.AD/0.HA	GABA_neurons
ENSG00000080815	PSEN1	0.444768	6.10082	0.015152	0.177827	3.AD/0.HA	GABA_neurons
ENSG00000251393	AC005280.1	-4.49824	0.583974	0.0266779	0.24195	3.AD/0.HA	GABA_neurons
ENSG00000177465	ACOT4	-2.55571	0.82798	0.0278064	0.246463	3.AD/0.HA	GABA_neurons
ENSG00000176903	PNMA1	-1.05345	3.70194	0.00201429	0.0534908	3.AD/0.HA	GABA_neurons
ENSG00000119703	ZC2HC1C	-1.87672	2.00843	0.00182312	0.0507395	3.AD/0.HA	GABA_neurons
ENSG00000258569	AC007376.2	0.655942	3.96306	0.0235932	0.227361	3.AD/0.HA	GABA_neurons
ENSG00000177108	ZDHHC22	-1.0934	3.00651	0.0221688	0.219525	3.AD/0.HA	GABA_neurons
ENSG00000100580	TMED8	-0.435653	5.54684	0.0221732	0.219525	3.AD/0.HA	GABA_neurons
ENSG00000100596	SPTLC2	0.492538	5.47003	0.0156835	0.180556	3.AD/0.HA	GABA_neurons
ENSG00000021645	NRXN3	0.547314	12.6784	0.00449403	0.0878091	3.AD/0.HA	GABA_neurons
ENSG00000258419	AC022469.1	1.24028	3.22113	0.00134769	0.0414999	3.AD/0.HA	GABA_neurons
ENSG00000259106	AC008056.2	-1.25389	2.789	0.00642667	0.109151	3.AD/0.HA	GABA_neurons
ENSG00000258637	AC008056.1	-1.10062	5.49389	0.000125628	0.00884992	3.AD/0.HA	GABA_neurons
ENSG00000258766	DIO2-AS1	-2.70798	1.86778	0.000287598	0.0151359	3.AD/0.HA	GABA_neurons
ENSG00000258733	LINC02328	0.965504	4.69091	0.00171442	0.0485841	3.AD/0.HA	GABA_neurons
ENSG00000042317	SPATA7	-0.61723	6.16348	0.00309713	0.0700717	3.AD/0.HA	GABA_neurons
ENSG00000198668	CALM1	-0.59194	8.28743	0.00661812	0.111283	3.AD/0.HA	GABA_neurons
ENSG00000260711	AL121839.2	-4.07025	0.371835	0.0255291	0.236067	3.AD/0.HA	GABA_neurons
ENSG00000165929	TC2N	-2.05592	2.46371	0.000530309	0.0232899	3.AD/0.HA	GABA_neurons
ENSG00000100604	CHGA	-1.14476	3.94013	0.00113289	0.0376295	3.AD/0.HA	GABA_neurons
ENSG00000175785	PRIMA1	1.18909	1.97552	0.0119617	0.156369	3.AD/0.HA	GABA_neurons
ENSG00000089737	DDX24	-0.68712	6.5735	0.00170583	0.0484082	3.AD/0.HA	GABA_neurons
ENSG00000165959	CLMN	1.57653	5.70872	5.48261e-08	3.26731e-05	3.AD/0.HA	GABA_neurons
ENSG00000176438	SYNE3	1.15148	1.99339	0.0199928	0.207209	3.AD/0.HA	GABA_neurons
ENSG00000225163	LINC00618	-2.98688	1.03919	0.0243827	0.231619	3.AD/0.HA	GABA_neurons
ENSG00000247970	AL160313.1	1.02395	3.3019	0.00295662	0.0678074	3.AD/0.HA	GABA_neurons
ENSG00000258560	AL157912.1	-2.08126	1.45377	0.0180621	0.194978	3.AD/0.HA	GABA_neurons
ENSG00000183092	BEGAIN	0.748872	4.07335	0.00453257	0.0881622	3.AD/0.HA	GABA_neurons
ENSG00000254656	RTL1	-1.4239	2.01963	0.00955149	0.138733	3.AD/0.HA	GABA_neurons
ENSG00000196663	TECPR2	0.524081	5.89374	0.00499039	0.0926813	3.AD/0.HA	GABA_neurons
ENSG00000185215	TNFAIP2	-1.33978	2.50209	0.0144521	0.174406	3.AD/0.HA	GABA_neurons
ENSG00000166165	CKB	-1.47575	5.46471	8.26015e-07	0.00022927	3.AD/0.HA	GABA_neurons
ENSG00000156411	ATP5MPL	-1.32104	4.66623	0.000260074	0.0142422	3.AD/0.HA	GABA_neurons
ENSG00000258986	TMEM179	-1.02348	3.74611	0.0088132	0.132178	3.AD/0.HA	GABA_neurons
ENSG00000203485	INF2	1.04833	2.3254	0.0182327	0.196175	3.AD/0.HA	GABA_neurons
ENSG00000184887	BTBD6	-1.16012	2.4068	0.0198885	0.206807	3.AD/0.HA	GABA_neurons
ENSG00000251602	AL928654.1	1.60684	1.1834	0.0166654	0.18706	3.AD/0.HA	GABA_neurons
ENSG00000258710	LINC01193	1.91419	1.74365	0.00176702	0.0495511	3.AD/0.HA	GABA_neurons
ENSG00000275835	TUBGCP5	-0.58446	5.22894	0.0113093	0.152313	3.AD/0.HA	GABA_neurons
ENSG00000179455	MKRN3	1.26359	4.0936	0.00237056	0.0591138	3.AD/0.HA	GABA_neurons
ENSG00000254585	MAGEL2	-1.61626	1.64417	0.0211969	0.214676	3.AD/0.HA	GABA_neurons
ENSG00000182636	NDN	-1.54628	3.6455	0.000126893	0.00889653	3.AD/0.HA	GABA_neurons
ENSG00000257647	AC124312.2	-2.88641	0.985861	0.00964811	0.139436	3.AD/0.HA	GABA_neurons
ENSG00000287482	AC124312.5	-1.4178	3.18046	0.000840024	0.0307231	3.AD/0.HA	GABA_neurons
ENSG00000206190	ATP10A	1.2872	2.48889	0.0266818	0.24195	3.AD/0.HA	GABA_neurons
ENSG00000182256	GABRG3	0.620238	9.33461	0.00449093	0.0878091	3.AD/0.HA	GABA_neurons
ENSG00000261426	AC144833.1	1.02879	2.51698	0.0079515	0.124517	3.AD/0.HA	GABA_neurons
ENSG00000104067	TJP1	0.38047	8.25193	0.0259934	0.238316	3.AD/0.HA	GABA_neurons
ENSG00000166912	MTMR10	0.632674	4.84765	0.00444949	0.0872755	3.AD/0.HA	GABA_neurons
ENSG00000169918	OTUD7A	0.420443	8.54705	0.0147555	0.176075	3.AD/0.HA	GABA_neurons
ENSG00000261064	LINC02256	-0.80065	4.18511	0.0148717	0.176716	3.AD/0.HA	GABA_neurons
ENSG00000166922	SCG5	-0.717566	6.03655	0.000420566	0.0197715	3.AD/0.HA	GABA_neurons
ENSG00000166923	GREM1	1.57716	2.11457	0.00403275	0.0828717	3.AD/0.HA	GABA_neurons
ENSG00000198838	RYR3	0.580526	7.56371	0.0119149	0.156056	3.AD/0.HA	GABA_neurons
ENSG00000184984	CHRM5	1.1242	4.46932	3.02683e-05	0.00338837	3.AD/0.HA	GABA_neurons
ENSG00000134153	EMC7	-1.41394	3.62078	0.00439855	0.0867521	3.AD/0.HA	GABA_neurons
ENSG00000182117	NOP10	-2.14266	2.21247	0.00061043	0.0253974	3.AD/0.HA	GABA_neurons
ENSG00000215252	GOLGA8B	-0.744609	6.34709	0.00491643	0.0919821	3.AD/0.HA	GABA_neurons
ENSG00000248079	DPH6-DT	0.736469	6.63705	0.00732564	0.118084	3.AD/0.HA	GABA_neurons
ENSG00000186073	C15orf41	0.423284	6.56792	0.0162712	0.184698	3.AD/0.HA	GABA_neurons
ENSG00000172575	RASGRP1	-1.03763	4.22544	0.00187009	0.051136	3.AD/0.HA	GABA_neurons
ENSG00000175779	LINC02694	-1.5565	2.35498	0.00682801	0.113215	3.AD/0.HA	GABA_neurons
ENSG00000137801	THBS1	-5.09955	0.899739	0.00105165	0.0358729	3.AD/0.HA	GABA_neurons
ENSG00000140319	SRP14	-1.08732	5.4784	0.00306835	0.0696982	3.AD/0.HA	GABA_neurons
ENSG00000259521	INO80-AS1	-2.90722	1.59694	0.00216223	0.055317	3.AD/0.HA	GABA_neurons
ENSG00000137815	RTF1	-0.522426	6.00948	0.01327	0.166591	3.AD/0.HA	GABA_neurons
ENSG00000285080	AC068724.3	-0.939739	4.11925	0.00127374	0.0400729	3.AD/0.HA	GABA_neurons
ENSG00000223572	CKMT1A	-1.31004	2.58051	0.010889	0.149224	3.AD/0.HA	GABA_neurons
ENSG00000171877	FRMD5	0.625198	9.28369	0.00286154	0.0665911	3.AD/0.HA	GABA_neurons
ENSG00000259595	AC025043.1	-1.71199	3.19182	3.2562e-05	0.00356634	3.AD/0.HA	GABA_neurons
ENSG00000166710	B2M	-1.08872	4.84212	0.00286636	0.0665911	3.AD/0.HA	GABA_neurons
ENSG00000171766	GATM	0.817951	3.46203	0.00606068	0.104959	3.AD/0.HA	GABA_neurons
ENSG00000259255	AC073941.1	1.01604	3.66569	0.00139516	0.042382	3.AD/0.HA	GABA_neurons
ENSG00000188467	SLC24A5	-1.88148	1.57349	0.014598	0.175436	3.AD/0.HA	GABA_neurons
ENSG00000185634	SHC4	1.16582	3.11239	0.00120406	0.0391461	3.AD/0.HA	GABA_neurons
ENSG00000255302	EID1	-0.880056	5.63763	0.00506392	0.0934473	3.AD/0.HA	GABA_neurons
ENSG00000259715	AC022087.1	-4.198	0.399559	0.0160604	0.183127	3.AD/0.HA	GABA_neurons
ENSG00000259678	AC066613.2	-0.599333	4.16506	0.0272357	0.244398	3.AD/0.HA	GABA_neurons
ENSG00000104112	SCG3	-0.592046	6.66401	0.00476168	0.0906924	3.AD/0.HA	GABA_neurons
ENSG00000169856	ONECUT1	2.30963	0.702715	0.02454	0.232568	3.AD/0.HA	GABA_neurons
ENSG00000137766	UNC13C	0.497693	8.0243	0.0134831	0.168431	3.AD/0.HA	GABA_neurons
ENSG00000069869	NEDD4	0.799124	4.79255	0.00268774	0.0641924	3.AD/0.HA	GABA_neurons
ENSG00000260392	AC090518.1	0.605053	4.30832	0.0215434	0.216997	3.AD/0.HA	GABA_neurons
ENSG00000128918	ALDH1A2	-0.976451	5.56481	0.0107392	0.147796	3.AD/0.HA	GABA_neurons
ENSG00000157483	MYO1E	1.48596	4.17935	8.65665e-06	0.00137399	3.AD/0.HA	GABA_neurons
ENSG00000069667	RORA	0.425163	10.3546	0.0154529	0.179205	3.AD/0.HA	GABA_neurons
ENSG00000259564	AC009554.1	-1.82759	3.46668	5.08541e-06	0.000880689	3.AD/0.HA	GABA_neurons
ENSG00000259589	AC073167.1	-2.19673	3.98594	7.26631e-07	0.000221938	3.AD/0.HA	GABA_neurons
ENSG00000166794	PPIB	-1.21339	3.82363	0.000266059	0.0143454	3.AD/0.HA	GABA_neurons
ENSG00000169118	CSNK1G1	0.431543	6.24245	0.0240879	0.22968	3.AD/0.HA	GABA_neurons
ENSG00000140451	PIF1	-2.10963	1.08635	0.013379	0.16775	3.AD/0.HA	GABA_neurons
ENSG00000174444	RPL4	-0.999884	4.65623	0.000858087	0.0311587	3.AD/0.HA	GABA_neurons
ENSG00000174442	ZWILCH	-2.83522	2.72377	4.39073e-07	0.000148275	3.AD/0.HA	GABA_neurons
ENSG00000140350	ANP32A	0.558644	5.1755	0.00546855	0.0983175	3.AD/0.HA	GABA_neurons
ENSG00000137818	RPLP1	-0.950578	5.89727	0.00478464	0.0906924	3.AD/0.HA	GABA_neurons
ENSG00000137831	UACA	0.995528	2.75053	0.0176691	0.192686	3.AD/0.HA	GABA_neurons
ENSG00000259964	THSD4-AS1	-1.84388	2.56055	0.00163588	0.0470828	3.AD/0.HA	GABA_neurons
ENSG00000261632	AC022872.1	-2.16832	2.70403	2.45797e-05	0.00294695	3.AD/0.HA	GABA_neurons
ENSG00000067221	STOML1	-1.33843	2.50005	0.00804774	0.125272	3.AD/0.HA	GABA_neurons
ENSG00000178741	COX5A	-0.88011	4.39697	0.00481075	0.0910127	3.AD/0.HA	GABA_neurons
ENSG00000169410	PTPN9	0.496765	6.49887	0.0048683	0.0914193	3.AD/0.HA	GABA_neurons
ENSG00000177971	IMP3	-1.99775	2.26013	0.000408806	0.0194442	3.AD/0.HA	GABA_neurons
ENSG00000117906	RCN2	-0.724144	6.14446	0.000606025	0.0253704	3.AD/0.HA	GABA_neurons
ENSG00000166426	CRABP1	-1.74758	1.50133	0.0151439	0.177827	3.AD/0.HA	GABA_neurons
ENSG00000185787	MORF4L1	-0.53687	6.25218	0.00375212	0.0787808	3.AD/0.HA	GABA_neurons
ENSG00000197978	GOLGA6L9	1.39033	2.00406	0.0122835	0.15934	3.AD/0.HA	GABA_neurons
ENSG00000182774	RPS17	-1.32996	4.45267	0.00123291	0.0395318	3.AD/0.HA	GABA_neurons
ENSG00000273540	AGBL1	-0.763092	5.72906	0.00159918	0.0465501	3.AD/0.HA	GABA_neurons
ENSG00000259494	MRPL46	-1.37188	2.63092	0.0047805	0.0906924	3.AD/0.HA	GABA_neurons
ENSG00000166821	PEX11A	-1.64776	2.16894	0.00301448	0.0688419	3.AD/0.HA	GABA_neurons
ENSG00000166823	MESP1	-2.24221	1.79989	0.00703321	0.115793	3.AD/0.HA	GABA_neurons
ENSG00000275443	AC012409.2	-1.45296	4.09966	0.000787618	0.0296573	3.AD/0.HA	GABA_neurons
ENSG00000259199	AC022523.1	0.656544	4.22862	0.0203711	0.209068	3.AD/0.HA	GABA_neurons
ENSG00000131873	CHSY1	0.590425	5.64099	0.00172394	0.0487856	3.AD/0.HA	GABA_neurons
ENSG00000140479	PCSK6	1.26458	5.26244	0.000181207	0.0115675	3.AD/0.HA	GABA_neurons
ENSG00000103152	MPG	-0.976853	2.92046	0.0252919	0.235886	3.AD/0.HA	GABA_neurons
ENSG00000242173	ARHGDIG	-1.66823	4.0202	0.000339729	0.0170386	3.AD/0.HA	GABA_neurons
ENSG00000197562	RAB40C	0.517093	4.95468	0.0256258	0.236502	3.AD/0.HA	GABA_neurons
ENSG00000130731	METTL26	-2.07913	3.22723	1.7087e-05	0.00227775	3.AD/0.HA	GABA_neurons
ENSG00000140983	RHOT2	-1.08516	3.1055	0.00624543	0.106969	3.AD/0.HA	GABA_neurons
ENSG00000103266	STUB1	-1.43115	3.70099	0.000222544	0.0128834	3.AD/0.HA	GABA_neurons
ENSG00000103024	NME3	-0.742736	4.00374	0.0245518	0.232571	3.AD/0.HA	GABA_neurons
ENSG00000074071	MRPS34	-0.920898	2.87154	0.0264348	0.240513	3.AD/0.HA	GABA_neurons
ENSG00000162032	SPSB3	-1.09104	2.75881	0.0138064	0.170161	3.AD/0.HA	GABA_neurons
ENSG00000162039	MEIOB	-1.143	2.64052	0.0269452	0.242866	3.AD/0.HA	GABA_neurons
ENSG00000140990	NDUFB10	-1.67407	3.78703	0.00175294	0.0494681	3.AD/0.HA	GABA_neurons
ENSG00000140988	RPS2	-1.0694	4.91657	0.000773357	0.0292821	3.AD/0.HA	GABA_neurons
ENSG00000127561	SYNGR3	-1.01978	3.95688	0.00165169	0.047269	3.AD/0.HA	GABA_neurons
ENSG00000260260	SNHG19	-1.47925	2.87147	0.00131972	0.0409498	3.AD/0.HA	GABA_neurons
ENSG00000131653	TRAF7	-1.21093	2.96845	0.00289887	0.0668984	3.AD/0.HA	GABA_neurons
[truncated: 4,313 more rows]
