# Supplementary material for: A roadmap to human hippocampal neurogenesis in adulthood, aging and AD.
Source: Research Square preprint supplement (doi:10.21203/rs.3.rs-4469965/v1), 2024-05-30
Supplement: Supplementary file 3 [file 2bf1493c37b894d982851961.xlsx]

## Sheet: README
Tabs in this document	Description
diff_summary	Summary of the number of differentially expressed features for each
	differential test run at QValue 0.05. Please refer to the diff tab
	description for more details.
filter_counts	Counts per feature: the number of observations in unit counts, after
	filtering low-expressed features.
norm	Normalized expression per feature.
	Values in this table are expressed as a fraction of total counts.
avg	Averaged normalized expression per group. Scaling as noted in the 'norm'
	tab
diff	Differential expression statistics.
	Statistics from generalized linear models, modeling the effect of
	multiple factors or sample groups simulataneously. There will be 2
	columns per factor test, one for PValue, and one for QValue (FDR-corrected
	p-value). You may see tests both for individual factors (e.g., Treatment:
	QValue), and for interaction terms between factors (e.g., Treatment::Genotype:
	QValue). Interaction terms test whether one factor's effect depends on
	the other factor (e.g., if the effect of a treatment depends on genotype).
	Pair-wise comparisons between samples. You will see four columns per
	comparison, all starting with the set of the groups being compared,
	e.g., Disease/Control. The four columns are: (1) log2FC (log2 fold-change),
	(2) log2CPM (log2 mean expression between both groups), (3) PValue, and
	(4) QValue. Note that the sample naming, such as Disease/Control (Disease
	divided by Control), indicates the direction of the log2FC: positive
	values mean higher expression in the numerator (Disease), negative
	values mean higher expression in the denominator (Control). To reverse
	the direction of the comparison (e.g., as Control/Disease), just reverse
	the sign of the log2FC (multiply by -1). All other statistics will
	remain the same.
lib	Normalization and dispersion estimates based on different differential
	comparisons. Normalization factors include the library size and TMM
	factor estimated by edgeR. Dispersion estimates include the common
	dispersion estimated for each comparison, and the corresponding biological
	coefficient of variation (BCV), equal to the square-root of the dispersion.
	Typical BCV values for well-controlled model systems are ~0.05-0.3,
	i.e., 5% to 30% variation relative to the mean.
removed_features	All features in the input data set, with TRUE/FALSE indicating if that
	feature was removed due to low expression, prior to differential testing.
	Only features listed as TRUE will be shown in other tabs.
metadata	Metadata used in the analysis, associating sample names with experimental
	groups.

## Sheet: diff_summary
Comparison	Total	Up	Down
Diagnosis	2
1.YC/0.HA	0	0	0
2.MCI/0.HA	0	0	0
3.AD/0.HA	1	0	1
2.MCI/1.YC	0	0	0
3.AD/1.YC	2	0	2
3.AD/2.MCI	0	0	0
*Significant features at Q < 0.05, log2FC > 0
*Out of 13 total

## Sheet: filter_counts
ID	1	2	3	4	5	6	7	8	9	10	11	12	13	14
Astrocytes	624	1489	2365	603	657	1249	51	1026	974	821	1411	91	77	314
CA2-4_neurons	45	201	320	67	50	548	23	284	179	231	81	14	0	115
CA_neurons	110	467	68	239	607	147	623	123	172	238	1355	235	1456	782
Endothelial	25	66	77	36	208	41	94	19	19	43	78	58	60	58
Ependymal	43	197	689	144	259	33	106	18	12	40	206	279	0	125
GABA_neurons	84	167	100	79	370	229	304	224	187	150	426	103	2111	635
Immature	0	7	2	6	91	41	106	193	164	2	58	1	347	161
Microglia	708	645	965	502	667	275	1275	689	621	877	362	553	203	595
Neural Stem	84	197	420	57	131	77	1868	59	114	88	19	772	344	1144
Neuroblast	6	9	28	3	78	102	5	2	61	3	21	1	45	52
OPCs	326	765	685	325	265	291	741	378	358	613	701	438	451	1019
mGC	61	846	769	385	347	1749	458	2544	1400	438	892	640	0	1383
mOli	3004	1735	4690	2110	3209	1048	1483	1365	2179	3081	1025	2553	721	4433

## Sheet: norm
ID	1	2	3	4	5	6	7	8	9	10	11	12	13	14
Astrocytes	0.121875	0.219261	0.211576	0.132353	0.0946822	0.214237	0.00714586	0.14818	0.151242	0.123925	0.21266	0.0158592	0.0132416	0.0290311
CA2-4_neurons	0.00878906	0.029598	0.0286277	0.0147059	0.00720565	0.0939966	0.00322264	0.0410168	0.027795	0.0348679	0.012208	0.00243987	0	0.0106324
CA_neurons	0.0214844	0.0687675	0.00608338	0.0524583	0.0874766	0.0252144	0.0872916	0.0177643	0.0267081	0.0359245	0.20422	0.040955	0.250387	0.0723003
Endothelial	0.00488281	0.00971875	0.00688853	0.00790167	0.0299755	0.00703259	0.0131708	0.00274408	0.00295031	0.00649057	0.0117558	0.0101081	0.0103181	0.00536243
Ependymal	0.00839844	0.029009	0.0616389	0.0316067	0.0373253	0.00566038	0.0148522	0.00259965	0.00186335	0.00603774	0.0310475	0.0486232	0	0.011557
GABA_neurons	0.0164063	0.0245914	0.00894614	0.0173398	0.0533218	0.0392796	0.0425949	0.0323512	0.0290373	0.0226415	0.064205	0.0179505	0.363027	0.0587093
Immature	0	0.00103078	0.000178923	0.00131694	0.0131143	0.00703259	0.0148522	0.0278741	0.0254658	0.000301887	0.00874152	0.000174277	0.0596733	0.0148854
Microglia	0.138281	0.0949786	0.0863303	0.110184	0.0961234	0.0471698	0.178646	0.099509	0.0964286	0.132377	0.0545592	0.096375	0.0349097	0.0550111
Neural Stem	0.0164063	0.029009	0.0375738	0.012511	0.0188788	0.0132075	0.261735	0.00852109	0.0177019	0.013283	0.0028636	0.134542	0.0591574	0.105769
Neuroblast	0.00117187	0.00132528	0.00250492	0.000658472	0.0112408	0.0174957	0.000700574	0.00028885	0.00947205	0.00045283	0.00316503	0.000174277	0.00773861	0.00480769
OPCs	0.0636719	0.112649	0.0612811	0.0713345	0.0381899	0.0499142	0.103825	0.0545927	0.0555901	0.0925283	0.105652	0.0763332	0.077558	0.0942123
mGC	0.0119141	0.124577	0.0687958	0.084504	0.0500072	0.3	0.0641726	0.367418	0.217391	0.0661132	0.134439	0.111537	0	0.127866
mOli	0.586719	0.255485	0.419574	0.463126	0.462459	0.17976	0.20779	0.19714	0.338354	0.465057	0.154484	0.444929	0.12399	0.409856

## Sheet: avg
ID	0.NCI	1.YA	2.MCI	3.AD
Astrocytes	0.116061	0.0211363	0.125922	0.171266
CA2-4_neurons	0.0363604	0.0053162	0.0193277	0.0204302
CA_neurons	0.0544367	0.161344	0.0769519	0.0371984
Endothelial	0.0132307	0.00784028	0.00782619	0.00734794
Ependymal	0.0151094	0.00577848	0.0218929	0.0326633
GABA_neurons	0.0418869	0.210868	0.0334586	0.0168209
Immature	0.0157183	0.0372793	0.00867088	0.000631661
Microglia	0.105362	0.0449604	0.094935	0.107444
Neural Stem	0.0755855	0.0824633	0.0420975	0.023875
Neuroblast	0.00743149	0.00627315	0.00331605	0.00141514
OPCs	0.0616305	0.0858852	0.0825259	0.0772341
mGC	0.195399	0.0639331	0.13237	0.0724476
mOli	0.261787	0.266923	0.350706	0.431226

## Sheet: diff
ID	Diagnosis : PValue	Diagnosis : QValue	1.YA/0.NCI : log2FC	1.YA/0.NCI : log2CPM	1.YA/0.NCI : PValue	1.YA/0.NCI : QValue	2.MCI/0.NCI : log2FC	2.MCI/0.NCI : log2CPM	2.MCI/0.NCI : PValue	2.MCI/0.NCI : QValue	3.AD/0.NCI : log2FC	3.AD/0.NCI : log2CPM	3.AD/0.NCI : PValue	3.AD/0.NCI : QValue	2.MCI/1.YA : log2FC	2.MCI/1.YA : log2CPM	2.MCI/1.YA : PValue	2.MCI/1.YA : QValue	3.AD/1.YA : log2FC	3.AD/1.YA : log2CPM	3.AD/1.YA : PValue	3.AD/1.YA : QValue	3.AD/2.MCI : log2FC	3.AD/2.MCI : log2CPM	3.AD/2.MCI : PValue	3.AD/2.MCI : QValue
Astrocytes	0.253121	0.658113	-2.45505	16.3691	0.121016	0.524404	0.117784	16.8873	0.903492	0.903492	0.561593	17.1345	0.473791	0.593706	2.57285	16.4772	0.123984	0.556932	3.01616	16.8898	0.0226107	0.0979795	0.443734	17.1832	0.538791	0.875535
CA2-4_neurons	0.540628	0.715658	-2.76027	14.6807	0.106404	0.524404	-0.91028	14.7797	0.411319	0.818819	-0.828439	14.8074	0.322673	0.507281	1.85145	13.8666	0.337952	0.687954	1.92858	13.936	0.18227	0.296189	0.0813796	14.301	0.923879	0.923879
CA_neurons	0.132138	0.429449	1.56687	16.4623	0.181652	0.59037	0.499166	16.0094	0.588151	0.818819	-0.550213	15.4919	0.502366	0.593706	-1.06769	16.6842	0.360667	0.687954	-2.11678	16.2658	0.0451961	0.142112	-1.0493	15.8072	0.217066	0.672148
Endothelial	0.708536	0.767581	-0.755727	13.5144	0.704842	0.916295	-0.756681	13.4028	0.447777	0.818819	-0.846909	13.3696	0.338999	0.507281	-0.00113688	12.9851	1	1	-0.0901161	12.9246	0.872179	0.944861	-0.0898407	12.9448	0.917757	0.923879
Ependymal	0.585162	0.715658	-1.37664	13.5833	0.446343	0.725308	0.533726	14.1979	0.635416	0.818819	1.11217	14.562	0.192185	0.4164	1.91116	14.0355	0.317526	0.687954	2.48608	14.5497	0.0959315	0.182599	0.578656	14.7513	0.524036	0.875535
GABA_neurons	0.00242082	0.0258065	2.33108	16.5867	0.0521118	0.524404	-0.323781	15.2121	0.692847	0.818819	-1.31627	14.8549	0.120303	0.312787	-2.65495	16.5021	0.0350265	0.455344	-3.6472	16.3183	0.000780342	0.00507222	-0.992831	14.634	0.17312	0.672148
Immature	0.00397024	0.0258065	1.24393	14.4995	0.31033	0.672382	-0.856575	13.6094	0.490572	0.818819	-4.64229	13.0493	1.14978e-05	0.000149471	-2.10075	14.1734	0.128523	0.556932	-5.88209	13.6779	4.00924e-06	5.21201e-05	-3.76256	12.2748	0.0126718	0.164734
Microglia	0.112375	0.429449	-1.22809	16.3829	0.432767	0.725308	-0.150432	16.6153	0.844471	0.903492	0.0279539	16.7023	0.972032	0.972032	1.07773	16.2607	0.529195	0.687954	1.25604	16.4059	0.328665	0.474738	0.178285	16.63	0.772692	0.923879
Neural Stem	0.465963	0.715658	0.125655	16.2534	0.846065	0.970755	-0.844518	15.8512	0.493448	0.818819	-1.66008	15.6102	0.0462531	0.20043	-0.970226	15.7682	0.42565	0.687954	-1.78628	15.4149	0.0983225	0.182599	-0.815595	15.0219	0.378137	0.819296
Neuroblast	0.330684	0.715658	-0.243975	12.8354	0.970755	0.970755	-1.15738	12.4696	0.39063	0.818819	-2.34741	12.2025	0.0125064	0.0812918	-0.913698	12.1628	0.493975	0.687954	-2.10734	11.6959	0.0546583	0.142112	-1.1977	11.3871	0.258518	0.672148
OPCs	0.781967	0.781967	0.478668	16.0942	0.639831	0.916295	0.421028	16.1425	0.583315	0.818819	0.325444	16.0886	0.685549	0.742678	-0.0575957	16.3561	0.884793	0.958526	-0.153211	16.294	0.824942	0.944861	-0.0955985	16.2901	0.87888	0.923879
mGC	0.605557	0.715658	-1.61061	17.2115	0.296883	0.672382	-0.561728	17.3241	0.504144	0.818819	-1.43091	17.0334	0.0726692	0.236175	1.04889	16.7443	0.521022	0.687954	0.17947	16.0923	0.958467	0.958467	-0.869144	16.6474	0.231881	0.672148
mOli	0.483804	0.715658	0.0281306	18.0082	0.905242	0.970755	0.421805	18.2249	0.566757	0.818819	0.719952	18.4029	0.351194	0.507281	0.393691	18.3006	0.837491	0.958526	0.691785	18.5224	0.5765	0.74945	0.29813	18.5769	0.629982	0.909974

## Sheet: lib
Sample	lib.size	norm.factors
1	5120	1
2	6791	1
3	11178	1
4	4556	1
5	6939	1
6	5830	1
7	7137	1
8	6924	1
9	6440	1
10	6625	1
11	6635	1
12	5738	1
13	5815	1
14	10816	1
sample.set	dispersion	BCV
0.NCI	0.887807	0.942235
1.YA	2.13037	1.45958
2.MCI	0.933909	0.96639
3.AD	0.301331	0.548936
full model	0.820976	0.906077
1.YA/0.NCI	1.14223	1.06875
2.MCI/0.NCI	0.910504	0.954203
3.AD/0.NCI	0.618419	0.786396
2.MCI/1.YA	1.18531	1.08872
3.AD/1.YA	0.706645	0.840622
3.AD/2.MCI	0.632797	0.795485

## Sheet: removed_features
ID	Retained
Astrocytes	TRUE
CA2-4_neurons	TRUE
CA_neurons	TRUE
Endothelial	TRUE
Ependymal	TRUE
GABA_neurons	TRUE
Immature	TRUE
Microglia	TRUE
Neural Stem	TRUE
Neuroblast	TRUE
OPCs	TRUE
mGC	TRUE
mOli	TRUE

## Sheet: metadata
Sample	Diagnosis
1	3.AD
2	3.AD
3	3.AD
4	3.AD
5	0.NCI
6	0.NCI
7	0.NCI
8	0.NCI
9	2.MCI
10	2.MCI
11	2.MCI
12	2.MCI
13	1.YA
14	1.YA
