# Supplementary material for: A roadmap to human hippocampal neurogenesis in adulthood, aging and AD.
Source: Research Square preprint supplement (doi:10.21203/rs.3.rs-4469965/v1), 2024-05-30
Supplement: Supplementary file 4 [file 32fad276d8cf7f8229d8b4b2.xlsx]

## Sheet: all_interactions
Interaction	Sender	Receiver	Weight	ligand	receptor	activator	interaction_type	ligand_type
CO_GUCY1A1	ClusterCA2-4_neurons	ClusterCA2.4_neurons	0.000105932	HMOX1,HMOX2	GUCY1A1		gas-effector	Gas
CO_GUCY1A1	ClusterCA_neurons	ClusterCA2.4_neurons	8.4362e-05	HMOX1,HMOX2	GUCY1A1		gas-effector	Gas
CO_GUCY1A1	ClusterGABA_neurons	ClusterCA2.4_neurons	7.38838e-05	HMOX1,HMOX2	GUCY1A1		gas-effector	Gas
CO_GUCY1A1	ClusterImmature	ClusterCA2.4_neurons	9.67593e-05	HMOX1,HMOX2	GUCY1A1		gas-effector	Gas
CO_GUCY1A1	ClustermGC	ClusterCA2.4_neurons	9.14555e-05	HMOX1,HMOX2	GUCY1A1		gas-effector	Gas
CO_GUCY1A1	ClusterCA2-4_neurons	ClusterCA_neurons	0.000116586	HMOX1,HMOX2	GUCY1A1		gas-effector	Gas
CO_GUCY1A1	ClusterCA_neurons	ClusterCA_neurons	9.28462e-05	HMOX1,HMOX2	GUCY1A1		gas-effector	Gas
CO_GUCY1A1	ClusterGABA_neurons	ClusterCA_neurons	8.13142e-05	HMOX1,HMOX2	GUCY1A1		gas-effector	Gas
CO_GUCY1A1	ClusterImmature	ClusterCA_neurons	0.00010649	HMOX1,HMOX2	GUCY1A1		gas-effector	Gas
CO_GUCY1A1	ClustermGC	ClusterCA_neurons	0.000100653	HMOX1,HMOX2	GUCY1A1		gas-effector	Gas
CO_GUCY1A1	ClusterCA2-4_neurons	ClusterEndothelial	0.000146667	HMOX1,HMOX2	GUCY1A1		gas-effector	Gas
CO_GUCY1A1	ClusterCA_neurons	ClusterEndothelial	0.000116802	HMOX1,HMOX2	GUCY1A1		gas-effector	Gas
CO_GUCY1A1	ClusterGABA_neurons	ClusterEndothelial	0.000102295	HMOX1,HMOX2	GUCY1A1		gas-effector	Gas
CO_GUCY1A1	ClusterImmature	ClusterEndothelial	0.000133967	HMOX1,HMOX2	GUCY1A1		gas-effector	Gas
CO_GUCY1A1	ClustermGC	ClusterEndothelial	0.000126623	HMOX1,HMOX2	GUCY1A1		gas-effector	Gas
CO_GUCY1A1	ClusterCA2-4_neurons	ClusterGABA_neurons	0.000202763	HMOX1,HMOX2	GUCY1A1		gas-effector	Gas
CO_GUCY1A1	ClusterCA_neurons	ClusterGABA_neurons	0.000161476	HMOX1,HMOX2	GUCY1A1		gas-effector	Gas
CO_GUCY1A1	ClusterGABA_neurons	ClusterGABA_neurons	0.00014142	HMOX1,HMOX2	GUCY1A1		gas-effector	Gas
CO_GUCY1A1	ClusterImmature	ClusterGABA_neurons	0.000185205	HMOX1,HMOX2	GUCY1A1		gas-effector	Gas
CO_GUCY1A1	ClustermGC	ClusterGABA_neurons	0.000175053	HMOX1,HMOX2	GUCY1A1		gas-effector	Gas
CO_GUCY1A1	ClusterCA2-4_neurons	ClusterImmature	0.000539756	HMOX1,HMOX2	GUCY1A1		gas-effector	Gas
CO_GUCY1A1	ClusterCA_neurons	ClusterImmature	0.000429849	HMOX1,HMOX2	GUCY1A1		gas-effector	Gas
CO_GUCY1A1	ClusterGABA_neurons	ClusterImmature	0.00037646	HMOX1,HMOX2	GUCY1A1		gas-effector	Gas
CO_GUCY1A1	ClusterImmature	ClusterImmature	0.000493017	HMOX1,HMOX2	GUCY1A1		gas-effector	Gas
CO_GUCY1A1	ClustermGC	ClusterImmature	0.000465992	HMOX1,HMOX2	GUCY1A1		gas-effector	Gas
CO_GUCY1A1	ClusterCA2-4_neurons	ClustermGC	0.00046747	HMOX1,HMOX2	GUCY1A1		gas-effector	Gas
CO_GUCY1A1	ClusterCA_neurons	ClustermGC	0.000372282	HMOX1,HMOX2	GUCY1A1		gas-effector	Gas
CO_GUCY1A1	ClusterGABA_neurons	ClustermGC	0.000326042	HMOX1,HMOX2	GUCY1A1		gas-effector	Gas
CO_GUCY1A1	ClusterImmature	ClustermGC	0.00042699	HMOX1,HMOX2	GUCY1A1		gas-effector	Gas
CO_GUCY1A1	ClustermGC	ClustermGC	0.000403584	HMOX1,HMOX2	GUCY1A1		gas-effector	Gas
CO_GUCY1A2	ClusterCA2-4_neurons	ClusterCA2.4_neurons	0.00177727	HMOX1,HMOX2	GUCY1A2		gas-effector	Gas
CO_GUCY1A2	ClusterCA_neurons	ClusterCA2.4_neurons	0.00141537	HMOX1,HMOX2	GUCY1A2		gas-effector	Gas
CO_GUCY1A2	ClusterGABA_neurons	ClusterCA2.4_neurons	0.00123958	HMOX1,HMOX2	GUCY1A2		gas-effector	Gas
CO_GUCY1A2	ClusterImmature	ClusterCA2.4_neurons	0.00162337	HMOX1,HMOX2	GUCY1A2		gas-effector	Gas
CO_GUCY1A2	ClustermGC	ClusterCA2.4_neurons	0.00153438	HMOX1,HMOX2	GUCY1A2		gas-effector	Gas
CO_GUCY1A2	ClusterCA2-4_neurons	ClusterCA_neurons	0.00166546	HMOX1,HMOX2	GUCY1A2		gas-effector	Gas
CO_GUCY1A2	ClusterCA_neurons	ClusterCA_neurons	0.00132633	HMOX1,HMOX2	GUCY1A2		gas-effector	Gas
CO_GUCY1A2	ClusterGABA_neurons	ClusterCA_neurons	0.00116159	HMOX1,HMOX2	GUCY1A2		gas-effector	Gas
CO_GUCY1A2	ClusterImmature	ClusterCA_neurons	0.00152124	HMOX1,HMOX2	GUCY1A2		gas-effector	Gas
CO_GUCY1A2	ClustermGC	ClusterCA_neurons	0.00143785	HMOX1,HMOX2	GUCY1A2		gas-effector	Gas
CO_GUCY1A2	ClusterCA2-4_neurons	ClusterEndothelial	0.000284638	HMOX1,HMOX2	GUCY1A2		gas-effector	Gas
CO_GUCY1A2	ClusterCA_neurons	ClusterEndothelial	0.000226679	HMOX1,HMOX2	GUCY1A2		gas-effector	Gas
CO_GUCY1A2	ClusterGABA_neurons	ClusterEndothelial	0.000198524	HMOX1,HMOX2	GUCY1A2		gas-effector	Gas
CO_GUCY1A2	ClusterImmature	ClusterEndothelial	0.00025999	HMOX1,HMOX2	GUCY1A2		gas-effector	Gas
CO_GUCY1A2	ClustermGC	ClusterEndothelial	0.000245739	HMOX1,HMOX2	GUCY1A2		gas-effector	Gas
CO_GUCY1A2	ClusterCA2-4_neurons	ClusterGABA_neurons	0.000885008	HMOX1,HMOX2	GUCY1A2		gas-effector	Gas
CO_GUCY1A2	ClusterCA_neurons	ClusterGABA_neurons	0.000704799	HMOX1,HMOX2	GUCY1A2		gas-effector	Gas
CO_GUCY1A2	ClusterGABA_neurons	ClusterGABA_neurons	0.00061726	HMOX1,HMOX2	GUCY1A2		gas-effector	Gas
CO_GUCY1A2	ClusterImmature	ClusterGABA_neurons	0.000808372	HMOX1,HMOX2	GUCY1A2		gas-effector	Gas
CO_GUCY1A2	ClustermGC	ClusterGABA_neurons	0.000764061	HMOX1,HMOX2	GUCY1A2		gas-effector	Gas
CO_GUCY1A2	ClusterCA2-4_neurons	ClusterImmature	0.00180596	HMOX1,HMOX2	GUCY1A2		gas-effector	Gas
CO_GUCY1A2	ClusterCA_neurons	ClusterImmature	0.00143822	HMOX1,HMOX2	GUCY1A2		gas-effector	Gas
CO_GUCY1A2	ClusterGABA_neurons	ClusterImmature	0.00125959	HMOX1,HMOX2	GUCY1A2		gas-effector	Gas
CO_GUCY1A2	ClusterImmature	ClusterImmature	0.00164958	HMOX1,HMOX2	GUCY1A2		gas-effector	Gas
CO_GUCY1A2	ClustermGC	ClusterImmature	0.00155915	HMOX1,HMOX2	GUCY1A2		gas-effector	Gas
CO_GUCY1A2	ClusterCA2-4_neurons	ClusterOPCs	0.00108169	HMOX1,HMOX2	GUCY1A2		gas-effector	Gas
CO_GUCY1A2	ClusterCA_neurons	ClusterOPCs	0.000861436	HMOX1,HMOX2	GUCY1A2		gas-effector	Gas
CO_GUCY1A2	ClusterGABA_neurons	ClusterOPCs	0.000754441	HMOX1,HMOX2	GUCY1A2		gas-effector	Gas
CO_GUCY1A2	ClusterImmature	ClusterOPCs	0.000988027	HMOX1,HMOX2	GUCY1A2		gas-effector	Gas
CO_GUCY1A2	ClustermGC	ClusterOPCs	0.000933869	HMOX1,HMOX2	GUCY1A2		gas-effector	Gas
CO_GUCY1A2	ClusterCA2-4_neurons	ClustermGC	0.00190588	HMOX1,HMOX2	GUCY1A2		gas-effector	Gas
CO_GUCY1A2	ClusterCA_neurons	ClustermGC	0.0015178	HMOX1,HMOX2	GUCY1A2		gas-effector	Gas
CO_GUCY1A2	ClusterGABA_neurons	ClustermGC	0.00132928	HMOX1,HMOX2	GUCY1A2		gas-effector	Gas
CO_GUCY1A2	ClusterImmature	ClustermGC	0.00174084	HMOX1,HMOX2	GUCY1A2		gas-effector	Gas
CO_GUCY1A2	ClustermGC	ClustermGC	0.00164542	HMOX1,HMOX2	GUCY1A2		gas-effector	Gas
CO_GUCY1B1	ClusterCA2-4_neurons	ClusterCA2.4_neurons	0.000381746	HMOX1,HMOX2	GUCY1B1		gas-effector	Gas
CO_GUCY1B1	ClusterCA_neurons	ClusterCA2.4_neurons	0.000304013	HMOX1,HMOX2	GUCY1B1		gas-effector	Gas
CO_GUCY1B1	ClusterGABA_neurons	ClusterCA2.4_neurons	0.000266253	HMOX1,HMOX2	GUCY1B1		gas-effector	Gas
CO_GUCY1B1	ClusterImmature	ClusterCA2.4_neurons	0.000348689	HMOX1,HMOX2	GUCY1B1		gas-effector	Gas
CO_GUCY1B1	ClustermGC	ClusterCA2.4_neurons	0.000329576	HMOX1,HMOX2	GUCY1B1		gas-effector	Gas
CO_GUCY1B1	ClusterCA2-4_neurons	ClusterCA_neurons	0.000450765	HMOX1,HMOX2	GUCY1B1		gas-effector	Gas
CO_GUCY1B1	ClusterCA_neurons	ClusterCA_neurons	0.000358978	HMOX1,HMOX2	GUCY1B1		gas-effector	Gas
CO_GUCY1B1	ClusterGABA_neurons	ClusterCA_neurons	0.000314391	HMOX1,HMOX2	GUCY1B1		gas-effector	Gas
CO_GUCY1B1	ClusterImmature	ClusterCA_neurons	0.000411732	HMOX1,HMOX2	GUCY1B1		gas-effector	Gas
CO_GUCY1B1	ClustermGC	ClusterCA_neurons	0.000389163	HMOX1,HMOX2	GUCY1B1		gas-effector	Gas
CO_GUCY1B1	ClusterCA2-4_neurons	ClusterEndothelial	0.000144517	HMOX1,HMOX2	GUCY1B1		gas-effector	Gas
CO_GUCY1B1	ClusterCA_neurons	ClusterEndothelial	0.00011509	HMOX1,HMOX2	GUCY1B1		gas-effector	Gas
CO_GUCY1B1	ClusterGABA_neurons	ClusterEndothelial	0.000100795	HMOX1,HMOX2	GUCY1B1		gas-effector	Gas
CO_GUCY1B1	ClusterImmature	ClusterEndothelial	0.000132003	HMOX1,HMOX2	GUCY1B1		gas-effector	Gas
CO_GUCY1B1	ClustermGC	ClusterEndothelial	0.000124767	HMOX1,HMOX2	GUCY1B1		gas-effector	Gas
CO_GUCY1B1	ClusterCA2-4_neurons	ClusterEpendymal	7.48174e-05	HMOX1,HMOX2	GUCY1B1		gas-effector	Gas
CO_GUCY1B1	ClusterCA_neurons	ClusterEpendymal	5.95828e-05	HMOX1,HMOX2	GUCY1B1		gas-effector	Gas
CO_GUCY1B1	ClusterGABA_neurons	ClusterEpendymal	5.21823e-05	HMOX1,HMOX2	GUCY1B1		gas-effector	Gas
CO_GUCY1B1	ClusterImmature	ClusterEpendymal	6.83387e-05	HMOX1,HMOX2	GUCY1B1		gas-effector	Gas
CO_GUCY1B1	ClustermGC	ClusterEpendymal	6.45927e-05	HMOX1,HMOX2	GUCY1B1		gas-effector	Gas
CO_GUCY1B1	ClusterCA2-4_neurons	ClusterGABA_neurons	0.0005355	HMOX1,HMOX2	GUCY1B1		gas-effector	Gas
CO_GUCY1B1	ClusterCA_neurons	ClusterGABA_neurons	0.00042646	HMOX1,HMOX2	GUCY1B1		gas-effector	Gas
CO_GUCY1B1	ClusterGABA_neurons	ClusterGABA_neurons	0.000373491	HMOX1,HMOX2	GUCY1B1		gas-effector	Gas
CO_GUCY1B1	ClusterImmature	ClusterGABA_neurons	0.00048913	HMOX1,HMOX2	GUCY1B1		gas-effector	Gas
CO_GUCY1B1	ClustermGC	ClusterGABA_neurons	0.000462318	HMOX1,HMOX2	GUCY1B1		gas-effector	Gas
CO_GUCY1B1	ClusterCA2-4_neurons	ClusterImmature	0.000654694	HMOX1,HMOX2	GUCY1B1		gas-effector	Gas
CO_GUCY1B1	ClusterCA_neurons	ClusterImmature	0.000521383	HMOX1,HMOX2	GUCY1B1		gas-effector	Gas
CO_GUCY1B1	ClusterGABA_neurons	ClusterImmature	0.000456624	HMOX1,HMOX2	GUCY1B1		gas-effector	Gas
CO_GUCY1B1	ClusterImmature	ClusterImmature	0.000598002	HMOX1,HMOX2	GUCY1B1		gas-effector	Gas
CO_GUCY1B1	ClustermGC	ClusterImmature	0.000565222	HMOX1,HMOX2	GUCY1B1		gas-effector	Gas
CO_GUCY1B1	ClusterCA2-4_neurons	ClustermGC	0.000525327	HMOX1,HMOX2	GUCY1B1		gas-effector	Gas
CO_GUCY1B1	ClusterCA_neurons	ClustermGC	0.000418358	HMOX1,HMOX2	GUCY1B1		gas-effector	Gas
CO_GUCY1B1	ClusterGABA_neurons	ClustermGC	0.000366396	HMOX1,HMOX2	GUCY1B1		gas-effector	Gas
CO_GUCY1B1	ClusterImmature	ClustermGC	0.000479838	HMOX1,HMOX2	GUCY1B1		gas-effector	Gas
CO_GUCY1B1	ClustermGC	ClustermGC	0.000453535	HMOX1,HMOX2	GUCY1B1		gas-effector	Gas
GJA1_GJA1	ClusterAstrocytes	ClusterAstrocytes	0.0420889	GJA1	GJA1	Ptpn2,Csnk1d,Prkce,Mapk7	ligand-receptor	Gap junction protein
GJA1_GJA1	ClusterEndothelial	ClusterAstrocytes	0.0104647	GJA1	GJA1	Ptpn2,Csnk1d,Prkce,Mapk7	ligand-receptor	Gap junction protein
GJA1_GJA1	ClusterEpendymal	ClusterAstrocytes	0.0416384	GJA1	GJA1	Ptpn2,Csnk1d,Prkce,Mapk7	ligand-receptor	Gap junction protein
GJA1_GJA1	ClusterNeural Stem	ClusterAstrocytes	0.0290288	GJA1	GJA1	Ptpn2,Csnk1d,Prkce,Mapk7	ligand-receptor	Gap junction protein
GJA1_GJA1	ClusterAstrocytes	ClusterEndothelial	0.0104647	GJA1	GJA1	Ptpn2,Csnk1d,Prkce,Mapk7	ligand-receptor	Gap junction protein
GJA1_GJA1	ClusterEndothelial	ClusterEndothelial	0.00260187	GJA1	GJA1	Ptpn2,Csnk1d,Prkce,Mapk7	ligand-receptor	Gap junction protein
GJA1_GJA1	ClusterEpendymal	ClusterEndothelial	0.0103527	GJA1	GJA1	Ptpn2,Csnk1d,Prkce,Mapk7	ligand-receptor	Gap junction protein
GJA1_GJA1	ClusterNeural Stem	ClusterEndothelial	0.00721752	GJA1	GJA1	Ptpn2,Csnk1d,Prkce,Mapk7	ligand-receptor	Gap junction protein
GJA1_GJA1	ClusterAstrocytes	ClusterEpendymal	0.0416384	GJA1	GJA1	Ptpn2,Csnk1d,Prkce,Mapk7	ligand-receptor	Gap junction protein
GJA1_GJA1	ClusterEndothelial	ClusterEpendymal	0.0103527	GJA1	GJA1	Ptpn2,Csnk1d,Prkce,Mapk7	ligand-receptor	Gap junction protein
GJA1_GJA1	ClusterEpendymal	ClusterEpendymal	0.0411926	GJA1	GJA1	Ptpn2,Csnk1d,Prkce,Mapk7	ligand-receptor	Gap junction protein
GJA1_GJA1	ClusterNeural Stem	ClusterEpendymal	0.028718	GJA1	GJA1	Ptpn2,Csnk1d,Prkce,Mapk7	ligand-receptor	Gap junction protein
GJA1_GJA1	ClusterAstrocytes	ClusterNeural.Stem	0.0290288	GJA1	GJA1	Ptpn2,Csnk1d,Prkce,Mapk7	ligand-receptor	Gap junction protein
GJA1_GJA1	ClusterEndothelial	ClusterNeural.Stem	0.00721752	GJA1	GJA1	Ptpn2,Csnk1d,Prkce,Mapk7	ligand-receptor	Gap junction protein
GJA1_GJA1	ClusterEpendymal	ClusterNeural.Stem	0.028718	GJA1	GJA1	Ptpn2,Csnk1d,Prkce,Mapk7	ligand-receptor	Gap junction protein
GJA1_GJA1	ClusterNeural Stem	ClusterNeural.Stem	0.0200212	GJA1	GJA1	Ptpn2,Csnk1d,Prkce,Mapk7	ligand-receptor	Gap junction protein
GJC1_GJC1	ClusterEndothelial	ClusterEndothelial	0.000742337	GJC1	GJC1		ligand-receptor	Gap junction protein
Glu_GRIA1	ClusterCA2-4_neurons	ClusterCA2.4_neurons	0.0436006	GLS,SLC17A6,SLC17A7,SLC17A8	GRIA1	Camk2a,Prkaca,Fyn,Epb41,Iqsec2,Shank3,Camk2g,Nptx1	ligand-receptor	Neurotransmitter
Glu_GRIA1	ClusterCA_neurons	ClusterCA2.4_neurons	0.0368916	GLS,SLC17A6,SLC17A7,SLC17A8	GRIA1	Camk2a,Prkaca,Fyn,Epb41,Iqsec2,Shank3,Camk2g,Nptx1	ligand-receptor	Neurotransmitter
Glu_GRIA1	ClusterImmature	ClusterCA2.4_neurons	0.0514979	GLS,SLC17A6,SLC17A7,SLC17A8	GRIA1	Camk2a,Prkaca,Fyn,Epb41,Iqsec2,Shank3,Camk2g,Nptx1	ligand-receptor	Neurotransmitter
Glu_GRIA1	ClusterNeuroblast	ClusterCA2.4_neurons	0.0196733	GLS,SLC17A6,SLC17A7,SLC17A8	GRIA1	Camk2a,Prkaca,Fyn,Epb41,Iqsec2,Shank3,Camk2g,Nptx1	ligand-receptor	Neurotransmitter
Glu_GRIA1	ClustermGC	ClusterCA2.4_neurons	0.0410398	GLS,SLC17A6,SLC17A7,SLC17A8	GRIA1	Camk2a,Prkaca,Fyn,Epb41,Iqsec2,Shank3,Camk2g,Nptx1	ligand-receptor	Neurotransmitter
Glu_GRIA1	ClusterCA2-4_neurons	ClusterCA_neurons	0.0345182	GLS,SLC17A6,SLC17A7,SLC17A8	GRIA1	Camk2a,Prkaca,Fyn,Epb41,Iqsec2,Shank3,Camk2g,Nptx1	ligand-receptor	Neurotransmitter
Glu_GRIA1	ClusterCA_neurons	ClusterCA_neurons	0.0292067	GLS,SLC17A6,SLC17A7,SLC17A8	GRIA1	Camk2a,Prkaca,Fyn,Epb41,Iqsec2,Shank3,Camk2g,Nptx1	ligand-receptor	Neurotransmitter
Glu_GRIA1	ClusterImmature	ClusterCA_neurons	0.0407704	GLS,SLC17A6,SLC17A7,SLC17A8	GRIA1	Camk2a,Prkaca,Fyn,Epb41,Iqsec2,Shank3,Camk2g,Nptx1	ligand-receptor	Neurotransmitter
Glu_GRIA1	ClusterNeuroblast	ClusterCA_neurons	0.0155752	GLS,SLC17A6,SLC17A7,SLC17A8	GRIA1	Camk2a,Prkaca,Fyn,Epb41,Iqsec2,Shank3,Camk2g,Nptx1	ligand-receptor	Neurotransmitter
Glu_GRIA1	ClustermGC	ClusterCA_neurons	0.0324908	GLS,SLC17A6,SLC17A7,SLC17A8	GRIA1	Camk2a,Prkaca,Fyn,Epb41,Iqsec2,Shank3,Camk2g,Nptx1	ligand-receptor	Neurotransmitter
Glu_GRIA1	ClusterCA2-4_neurons	ClusterEpendymal	0.0100837	GLS,SLC17A6,SLC17A7,SLC17A8	GRIA1	Camk2a,Prkaca,Fyn,Epb41,Iqsec2,Shank3,Camk2g,Nptx1	ligand-receptor	Neurotransmitter
Glu_GRIA1	ClusterCA_neurons	ClusterEpendymal	0.00853211	GLS,SLC17A6,SLC17A7,SLC17A8	GRIA1	Camk2a,Prkaca,Fyn,Epb41,Iqsec2,Shank3,Camk2g,Nptx1	ligand-receptor	Neurotransmitter
Glu_GRIA1	ClusterImmature	ClusterEpendymal	0.0119102	GLS,SLC17A6,SLC17A7,SLC17A8	GRIA1	Camk2a,Prkaca,Fyn,Epb41,Iqsec2,Shank3,Camk2g,Nptx1	ligand-receptor	Neurotransmitter
Glu_GRIA1	ClusterNeuroblast	ClusterEpendymal	0.00454995	GLS,SLC17A6,SLC17A7,SLC17A8	GRIA1	Camk2a,Prkaca,Fyn,Epb41,Iqsec2,Shank3,Camk2g,Nptx1	ligand-receptor	Neurotransmitter
Glu_GRIA1	ClustermGC	ClusterEpendymal	0.00949147	GLS,SLC17A6,SLC17A7,SLC17A8	GRIA1	Camk2a,Prkaca,Fyn,Epb41,Iqsec2,Shank3,Camk2g,Nptx1	ligand-receptor	Neurotransmitter
Glu_GRIA1	ClusterCA2-4_neurons	ClusterGABA_neurons	0.0300128	GLS,SLC17A6,SLC17A7,SLC17A8	GRIA1	Camk2a,Prkaca,Fyn,Epb41,Iqsec2,Shank3,Camk2g,Nptx1	ligand-receptor	Neurotransmitter
Glu_GRIA1	ClusterCA_neurons	ClusterGABA_neurons	0.0253946	GLS,SLC17A6,SLC17A7,SLC17A8	GRIA1	Camk2a,Prkaca,Fyn,Epb41,Iqsec2,Shank3,Camk2g,Nptx1	ligand-receptor	Neurotransmitter
Glu_GRIA1	ClusterImmature	ClusterGABA_neurons	0.0354489	GLS,SLC17A6,SLC17A7,SLC17A8	GRIA1	Camk2a,Prkaca,Fyn,Epb41,Iqsec2,Shank3,Camk2g,Nptx1	ligand-receptor	Neurotransmitter
Glu_GRIA1	ClusterNeuroblast	ClusterGABA_neurons	0.0135423	GLS,SLC17A6,SLC17A7,SLC17A8	GRIA1	Camk2a,Prkaca,Fyn,Epb41,Iqsec2,Shank3,Camk2g,Nptx1	ligand-receptor	Neurotransmitter
Glu_GRIA1	ClustermGC	ClusterGABA_neurons	0.02825	GLS,SLC17A6,SLC17A7,SLC17A8	GRIA1	Camk2a,Prkaca,Fyn,Epb41,Iqsec2,Shank3,Camk2g,Nptx1	ligand-receptor	Neurotransmitter
Glu_GRIA1	ClusterCA2-4_neurons	ClusterImmature	0.0350973	GLS,SLC17A6,SLC17A7,SLC17A8	GRIA1	Camk2a,Prkaca,Fyn,Epb41,Iqsec2,Shank3,Camk2g,Nptx1	ligand-receptor	Neurotransmitter
Glu_GRIA1	ClusterCA_neurons	ClusterImmature	0.0296967	GLS,SLC17A6,SLC17A7,SLC17A8	GRIA1	Camk2a,Prkaca,Fyn,Epb41,Iqsec2,Shank3,Camk2g,Nptx1	ligand-receptor	Neurotransmitter
Glu_GRIA1	ClusterImmature	ClusterImmature	0.0414544	GLS,SLC17A6,SLC17A7,SLC17A8	GRIA1	Camk2a,Prkaca,Fyn,Epb41,Iqsec2,Shank3,Camk2g,Nptx1	ligand-receptor	Neurotransmitter
Glu_GRIA1	ClusterNeuroblast	ClusterImmature	0.0158365	GLS,SLC17A6,SLC17A7,SLC17A8	GRIA1	Camk2a,Prkaca,Fyn,Epb41,Iqsec2,Shank3,Camk2g,Nptx1	ligand-receptor	Neurotransmitter
Glu_GRIA1	ClustermGC	ClusterImmature	0.0330359	GLS,SLC17A6,SLC17A7,SLC17A8	GRIA1	Camk2a,Prkaca,Fyn,Epb41,Iqsec2,Shank3,Camk2g,Nptx1	ligand-receptor	Neurotransmitter
Glu_GRIA1	ClusterCA2-4_neurons	ClusterNeuroblast	0.00280505	GLS,SLC17A6,SLC17A7,SLC17A8	GRIA1	Camk2a,Prkaca,Fyn,Epb41,Iqsec2,Shank3,Camk2g,Nptx1	ligand-receptor	Neurotransmitter
Glu_GRIA1	ClusterCA_neurons	ClusterNeuroblast	0.00237342	GLS,SLC17A6,SLC17A7,SLC17A8	GRIA1	Camk2a,Prkaca,Fyn,Epb41,Iqsec2,Shank3,Camk2g,Nptx1	ligand-receptor	Neurotransmitter
Glu_GRIA1	ClusterImmature	ClusterNeuroblast	0.00331312	GLS,SLC17A6,SLC17A7,SLC17A8	GRIA1	Camk2a,Prkaca,Fyn,Epb41,Iqsec2,Shank3,Camk2g,Nptx1	ligand-receptor	Neurotransmitter
Glu_GRIA1	ClusterNeuroblast	ClusterNeuroblast	0.00126568	GLS,SLC17A6,SLC17A7,SLC17A8	GRIA1	Camk2a,Prkaca,Fyn,Epb41,Iqsec2,Shank3,Camk2g,Nptx1	ligand-receptor	Neurotransmitter
Glu_GRIA1	ClustermGC	ClusterNeuroblast	0.00264029	GLS,SLC17A6,SLC17A7,SLC17A8	GRIA1	Camk2a,Prkaca,Fyn,Epb41,Iqsec2,Shank3,Camk2g,Nptx1	ligand-receptor	Neurotransmitter
Glu_GRIA1	ClusterCA2-4_neurons	ClusterOPCs	0.00365018	GLS,SLC17A6,SLC17A7,SLC17A8	GRIA1	Camk2a,Prkaca,Fyn,Epb41,Iqsec2,Shank3,Camk2g,Nptx1	ligand-receptor	Neurotransmitter
Glu_GRIA1	ClusterCA_neurons	ClusterOPCs	0.00308851	GLS,SLC17A6,SLC17A7,SLC17A8	GRIA1	Camk2a,Prkaca,Fyn,Epb41,Iqsec2,Shank3,Camk2g,Nptx1	ligand-receptor	Neurotransmitter
Glu_GRIA1	ClusterImmature	ClusterOPCs	0.00431132	GLS,SLC17A6,SLC17A7,SLC17A8	GRIA1	Camk2a,Prkaca,Fyn,Epb41,Iqsec2,Shank3,Camk2g,Nptx1	ligand-receptor	Neurotransmitter
Glu_GRIA1	ClusterNeuroblast	ClusterOPCs	0.00164702	GLS,SLC17A6,SLC17A7,SLC17A8	GRIA1	Camk2a,Prkaca,Fyn,Epb41,Iqsec2,Shank3,Camk2g,Nptx1	ligand-receptor	Neurotransmitter
Glu_GRIA1	ClustermGC	ClusterOPCs	0.00343578	GLS,SLC17A6,SLC17A7,SLC17A8	GRIA1	Camk2a,Prkaca,Fyn,Epb41,Iqsec2,Shank3,Camk2g,Nptx1	ligand-receptor	Neurotransmitter
Glu_GRIA1	ClusterCA2-4_neurons	ClustermGC	0.0364094	GLS,SLC17A6,SLC17A7,SLC17A8	GRIA1	Camk2a,Prkaca,Fyn,Epb41,Iqsec2,Shank3,Camk2g,Nptx1	ligand-receptor	Neurotransmitter
Glu_GRIA1	ClusterCA_neurons	ClustermGC	0.030807	GLS,SLC17A6,SLC17A7,SLC17A8	GRIA1	Camk2a,Prkaca,Fyn,Epb41,Iqsec2,Shank3,Camk2g,Nptx1	ligand-receptor	Neurotransmitter
Glu_GRIA1	ClusterImmature	ClustermGC	0.0430042	GLS,SLC17A6,SLC17A7,SLC17A8	GRIA1	Camk2a,Prkaca,Fyn,Epb41,Iqsec2,Shank3,Camk2g,Nptx1	ligand-receptor	Neurotransmitter
Glu_GRIA1	ClusterNeuroblast	ClustermGC	0.0164285	GLS,SLC17A6,SLC17A7,SLC17A8	GRIA1	Camk2a,Prkaca,Fyn,Epb41,Iqsec2,Shank3,Camk2g,Nptx1	ligand-receptor	Neurotransmitter
Glu_GRIA1	ClustermGC	ClustermGC	0.0342709	GLS,SLC17A6,SLC17A7,SLC17A8	GRIA1	Camk2a,Prkaca,Fyn,Epb41,Iqsec2,Shank3,Camk2g,Nptx1	ligand-receptor	Neurotransmitter
Glu_GRIA2	ClusterCA2-4_neurons	ClusterAstrocytes	0.0136233	GLS,SLC17A6,SLC17A7,SLC17A8	GRIA2	Iqsec2,Shank3	ligand-receptor	Neurotransmitter
Glu_GRIA2	ClusterCA_neurons	ClusterAstrocytes	0.0115271	GLS,SLC17A6,SLC17A7,SLC17A8	GRIA2	Iqsec2,Shank3	ligand-receptor	Neurotransmitter
Glu_GRIA2	ClusterImmature	ClusterAstrocytes	0.0160909	GLS,SLC17A6,SLC17A7,SLC17A8	GRIA2	Iqsec2,Shank3	ligand-receptor	Neurotransmitter
Glu_GRIA2	ClusterNeuroblast	ClusterAstrocytes	0.00614708	GLS,SLC17A6,SLC17A7,SLC17A8	GRIA2	Iqsec2,Shank3	ligand-receptor	Neurotransmitter
Glu_GRIA2	ClustermGC	ClusterAstrocytes	0.0128232	GLS,SLC17A6,SLC17A7,SLC17A8	GRIA2	Iqsec2,Shank3	ligand-receptor	Neurotransmitter
Glu_GRIA2	ClusterCA2-4_neurons	ClusterCA2.4_neurons	0.0390726	GLS,SLC17A6,SLC17A7,SLC17A8	GRIA2	Iqsec2,Shank3	ligand-receptor	Neurotransmitter
Glu_GRIA2	ClusterCA_neurons	ClusterCA2.4_neurons	0.0330604	GLS,SLC17A6,SLC17A7,SLC17A8	GRIA2	Iqsec2,Shank3	ligand-receptor	Neurotransmitter
Glu_GRIA2	ClusterImmature	ClusterCA2.4_neurons	0.0461498	GLS,SLC17A6,SLC17A7,SLC17A8	GRIA2	Iqsec2,Shank3	ligand-receptor	Neurotransmitter
Glu_GRIA2	ClusterNeuroblast	ClusterCA2.4_neurons	0.0176302	GLS,SLC17A6,SLC17A7,SLC17A8	GRIA2	Iqsec2,Shank3	ligand-receptor	Neurotransmitter
Glu_GRIA2	ClustermGC	ClusterCA2.4_neurons	0.0367777	GLS,SLC17A6,SLC17A7,SLC17A8	GRIA2	Iqsec2,Shank3	ligand-receptor	Neurotransmitter
Glu_GRIA2	ClusterCA2-4_neurons	ClusterCA_neurons	0.0383053	GLS,SLC17A6,SLC17A7,SLC17A8	GRIA2	Iqsec2,Shank3	ligand-receptor	Neurotransmitter
Glu_GRIA2	ClusterCA_neurons	ClusterCA_neurons	0.0324111	GLS,SLC17A6,SLC17A7,SLC17A8	GRIA2	Iqsec2,Shank3	ligand-receptor	Neurotransmitter
Glu_GRIA2	ClusterImmature	ClusterCA_neurons	0.0452434	GLS,SLC17A6,SLC17A7,SLC17A8	GRIA2	Iqsec2,Shank3	ligand-receptor	Neurotransmitter
Glu_GRIA2	ClusterNeuroblast	ClusterCA_neurons	0.017284	GLS,SLC17A6,SLC17A7,SLC17A8	GRIA2	Iqsec2,Shank3	ligand-receptor	Neurotransmitter
Glu_GRIA2	ClustermGC	ClusterCA_neurons	0.0360554	GLS,SLC17A6,SLC17A7,SLC17A8	GRIA2	Iqsec2,Shank3	ligand-receptor	Neurotransmitter
Glu_GRIA2	ClusterCA2-4_neurons	ClusterEndothelial	0.00190595	GLS,SLC17A6,SLC17A7,SLC17A8	GRIA2	Iqsec2,Shank3	ligand-receptor	Neurotransmitter
Glu_GRIA2	ClusterCA_neurons	ClusterEndothelial	0.00161268	GLS,SLC17A6,SLC17A7,SLC17A8	GRIA2	Iqsec2,Shank3	ligand-receptor	Neurotransmitter
Glu_GRIA2	ClusterImmature	ClusterEndothelial	0.00225118	GLS,SLC17A6,SLC17A7,SLC17A8	GRIA2	Iqsec2,Shank3	ligand-receptor	Neurotransmitter
Glu_GRIA2	ClusterNeuroblast	ClusterEndothelial	0.000859998	GLS,SLC17A6,SLC17A7,SLC17A8	GRIA2	Iqsec2,Shank3	ligand-receptor	Neurotransmitter
Glu_GRIA2	ClustermGC	ClusterEndothelial	0.00179401	GLS,SLC17A6,SLC17A7,SLC17A8	GRIA2	Iqsec2,Shank3	ligand-receptor	Neurotransmitter
Glu_GRIA2	ClusterCA2-4_neurons	ClusterEpendymal	0.00559913	GLS,SLC17A6,SLC17A7,SLC17A8	GRIA2	Iqsec2,Shank3	ligand-receptor	Neurotransmitter
Glu_GRIA2	ClusterCA_neurons	ClusterEpendymal	0.00473757	GLS,SLC17A6,SLC17A7,SLC17A8	GRIA2	Iqsec2,Shank3	ligand-receptor	Neurotransmitter
Glu_GRIA2	ClusterImmature	ClusterEpendymal	0.00661329	GLS,SLC17A6,SLC17A7,SLC17A8	GRIA2	Iqsec2,Shank3	ligand-receptor	Neurotransmitter
Glu_GRIA2	ClusterNeuroblast	ClusterEpendymal	0.00252642	GLS,SLC17A6,SLC17A7,SLC17A8	GRIA2	Iqsec2,Shank3	ligand-receptor	Neurotransmitter
Glu_GRIA2	ClustermGC	ClusterEpendymal	0.00527027	GLS,SLC17A6,SLC17A7,SLC17A8	GRIA2	Iqsec2,Shank3	ligand-receptor	Neurotransmitter
Glu_GRIA2	ClusterCA2-4_neurons	ClusterGABA_neurons	0.0300487	GLS,SLC17A6,SLC17A7,SLC17A8	GRIA2	Iqsec2,Shank3	ligand-receptor	Neurotransmitter
Glu_GRIA2	ClusterCA_neurons	ClusterGABA_neurons	0.025425	GLS,SLC17A6,SLC17A7,SLC17A8	GRIA2	Iqsec2,Shank3	ligand-receptor	Neurotransmitter
Glu_GRIA2	ClusterImmature	ClusterGABA_neurons	0.0354913	GLS,SLC17A6,SLC17A7,SLC17A8	GRIA2	Iqsec2,Shank3	ligand-receptor	Neurotransmitter
Glu_GRIA2	ClusterNeuroblast	ClusterGABA_neurons	0.0135585	GLS,SLC17A6,SLC17A7,SLC17A8	GRIA2	Iqsec2,Shank3	ligand-receptor	Neurotransmitter
Glu_GRIA2	ClustermGC	ClusterGABA_neurons	0.0282838	GLS,SLC17A6,SLC17A7,SLC17A8	GRIA2	Iqsec2,Shank3	ligand-receptor	Neurotransmitter
Glu_GRIA2	ClusterCA2-4_neurons	ClusterImmature	0.0395964	GLS,SLC17A6,SLC17A7,SLC17A8	GRIA2	Iqsec2,Shank3	ligand-receptor	Neurotransmitter
Glu_GRIA2	ClusterCA_neurons	ClusterImmature	0.0335035	GLS,SLC17A6,SLC17A7,SLC17A8	GRIA2	Iqsec2,Shank3	ligand-receptor	Neurotransmitter
Glu_GRIA2	ClusterImmature	ClusterImmature	0.0467684	GLS,SLC17A6,SLC17A7,SLC17A8	GRIA2	Iqsec2,Shank3	ligand-receptor	Neurotransmitter
Glu_GRIA2	ClusterNeuroblast	ClusterImmature	0.0178665	GLS,SLC17A6,SLC17A7,SLC17A8	GRIA2	Iqsec2,Shank3	ligand-receptor	Neurotransmitter
Glu_GRIA2	ClustermGC	ClusterImmature	0.0372707	GLS,SLC17A6,SLC17A7,SLC17A8	GRIA2	Iqsec2,Shank3	ligand-receptor	Neurotransmitter
Glu_GRIA2	ClusterCA2-4_neurons	ClusterNeural.Stem	0.00517814	GLS,SLC17A6,SLC17A7,SLC17A8	GRIA2	Iqsec2,Shank3	ligand-receptor	Neurotransmitter
Glu_GRIA2	ClusterCA_neurons	ClusterNeural.Stem	0.00438136	GLS,SLC17A6,SLC17A7,SLC17A8	GRIA2	Iqsec2,Shank3	ligand-receptor	Neurotransmitter
Glu_GRIA2	ClusterImmature	ClusterNeural.Stem	0.00611604	GLS,SLC17A6,SLC17A7,SLC17A8	GRIA2	Iqsec2,Shank3	ligand-receptor	Neurotransmitter
Glu_GRIA2	ClusterNeuroblast	ClusterNeural.Stem	0.00233646	GLS,SLC17A6,SLC17A7,SLC17A8	GRIA2	Iqsec2,Shank3	ligand-receptor	Neurotransmitter
Glu_GRIA2	ClustermGC	ClusterNeural.Stem	0.004874	GLS,SLC17A6,SLC17A7,SLC17A8	GRIA2	Iqsec2,Shank3	ligand-receptor	Neurotransmitter
Glu_GRIA2	ClusterCA2-4_neurons	ClusterNeuroblast	0.0172616	GLS,SLC17A6,SLC17A7,SLC17A8	GRIA2	Iqsec2,Shank3	ligand-receptor	Neurotransmitter
Glu_GRIA2	ClusterCA_neurons	ClusterNeuroblast	0.0146055	GLS,SLC17A6,SLC17A7,SLC17A8	GRIA2	Iqsec2,Shank3	ligand-receptor	Neurotransmitter
Glu_GRIA2	ClusterImmature	ClusterNeuroblast	0.0203881	GLS,SLC17A6,SLC17A7,SLC17A8	GRIA2	Iqsec2,Shank3	ligand-receptor	Neurotransmitter
Glu_GRIA2	ClusterNeuroblast	ClusterNeuroblast	0.00778871	GLS,SLC17A6,SLC17A7,SLC17A8	GRIA2	Iqsec2,Shank3	ligand-receptor	Neurotransmitter
Glu_GRIA2	ClustermGC	ClusterNeuroblast	0.0162477	GLS,SLC17A6,SLC17A7,SLC17A8	GRIA2	Iqsec2,Shank3	ligand-receptor	Neurotransmitter
Glu_GRIA2	ClusterCA2-4_neurons	ClusterOPCs	0.0350658	GLS,SLC17A6,SLC17A7,SLC17A8	GRIA2	Iqsec2,Shank3	ligand-receptor	Neurotransmitter
Glu_GRIA2	ClusterCA_neurons	ClusterOPCs	0.0296701	GLS,SLC17A6,SLC17A7,SLC17A8	GRIA2	Iqsec2,Shank3	ligand-receptor	Neurotransmitter
Glu_GRIA2	ClusterImmature	ClusterOPCs	0.0414172	GLS,SLC17A6,SLC17A7,SLC17A8	GRIA2	Iqsec2,Shank3	ligand-receptor	Neurotransmitter
Glu_GRIA2	ClusterNeuroblast	ClusterOPCs	0.0158223	GLS,SLC17A6,SLC17A7,SLC17A8	GRIA2	Iqsec2,Shank3	ligand-receptor	Neurotransmitter
Glu_GRIA2	ClustermGC	ClusterOPCs	0.0330062	GLS,SLC17A6,SLC17A7,SLC17A8	GRIA2	Iqsec2,Shank3	ligand-receptor	Neurotransmitter
Glu_GRIA2	ClusterCA2-4_neurons	ClustermGC	0.0396878	GLS,SLC17A6,SLC17A7,SLC17A8	GRIA2	Iqsec2,Shank3	ligand-receptor	Neurotransmitter
Glu_GRIA2	ClusterCA_neurons	ClustermGC	0.0335809	GLS,SLC17A6,SLC17A7,SLC17A8	GRIA2	Iqsec2,Shank3	ligand-receptor	Neurotransmitter
Glu_GRIA2	ClusterImmature	ClustermGC	0.0468763	GLS,SLC17A6,SLC17A7,SLC17A8	GRIA2	Iqsec2,Shank3	ligand-receptor	Neurotransmitter
Glu_GRIA2	ClusterNeuroblast	ClustermGC	0.0179078	GLS,SLC17A6,SLC17A7,SLC17A8	GRIA2	Iqsec2,Shank3	ligand-receptor	Neurotransmitter
Glu_GRIA2	ClustermGC	ClustermGC	0.0373567	GLS,SLC17A6,SLC17A7,SLC17A8	GRIA2	Iqsec2,Shank3	ligand-receptor	Neurotransmitter
Glu_GRIA2	ClusterCA2-4_neurons	ClustermOli	0.00599758	GLS,SLC17A6,SLC17A7,SLC17A8	GRIA2	Iqsec2,Shank3	ligand-receptor	Neurotransmitter
Glu_GRIA2	ClusterCA_neurons	ClustermOli	0.00507471	GLS,SLC17A6,SLC17A7,SLC17A8	GRIA2	Iqsec2,Shank3	ligand-receptor	Neurotransmitter
Glu_GRIA2	ClusterImmature	ClustermOli	0.00708391	GLS,SLC17A6,SLC17A7,SLC17A8	GRIA2	Iqsec2,Shank3	ligand-receptor	Neurotransmitter
Glu_GRIA2	ClusterNeuroblast	ClustermOli	0.00270621	GLS,SLC17A6,SLC17A7,SLC17A8	GRIA2	Iqsec2,Shank3	ligand-receptor	Neurotransmitter
Glu_GRIA2	ClustermGC	ClustermOli	0.00564531	GLS,SLC17A6,SLC17A7,SLC17A8	GRIA2	Iqsec2,Shank3	ligand-receptor	Neurotransmitter
Glu_GRIA3	ClusterCA2-4_neurons	ClusterCA2.4_neurons	0.0287348	GLS,SLC17A6,SLC17A7,SLC17A8	GRIA3	Iqsec2,Shank3	ligand-receptor	Neurotransmitter
Glu_GRIA3	ClusterCA_neurons	ClusterCA2.4_neurons	0.0243133	GLS,SLC17A6,SLC17A7,SLC17A8	GRIA3	Iqsec2,Shank3	ligand-receptor	Neurotransmitter
Glu_GRIA3	ClusterImmature	ClusterCA2.4_neurons	0.0339395	GLS,SLC17A6,SLC17A7,SLC17A8	GRIA3	Iqsec2,Shank3	ligand-receptor	Neurotransmitter
Glu_GRIA3	ClusterNeuroblast	ClusterCA2.4_neurons	0.0129656	GLS,SLC17A6,SLC17A7,SLC17A8	GRIA3	Iqsec2,Shank3	ligand-receptor	Neurotransmitter
Glu_GRIA3	ClustermGC	ClusterCA2.4_neurons	0.0270471	GLS,SLC17A6,SLC17A7,SLC17A8	GRIA3	Iqsec2,Shank3	ligand-receptor	Neurotransmitter
Glu_GRIA3	ClusterCA2-4_neurons	ClusterCA_neurons	0.0297265	GLS,SLC17A6,SLC17A7,SLC17A8	GRIA3	Iqsec2,Shank3	ligand-receptor	Neurotransmitter
Glu_GRIA3	ClusterCA_neurons	ClusterCA_neurons	0.0251524	GLS,SLC17A6,SLC17A7,SLC17A8	GRIA3	Iqsec2,Shank3	ligand-receptor	Neurotransmitter
Glu_GRIA3	ClusterImmature	ClusterCA_neurons	0.0351108	GLS,SLC17A6,SLC17A7,SLC17A8	GRIA3	Iqsec2,Shank3	ligand-receptor	Neurotransmitter
Glu_GRIA3	ClusterNeuroblast	ClusterCA_neurons	0.0134131	GLS,SLC17A6,SLC17A7,SLC17A8	GRIA3	Iqsec2,Shank3	ligand-receptor	Neurotransmitter
Glu_GRIA3	ClustermGC	ClusterCA_neurons	0.0279805	GLS,SLC17A6,SLC17A7,SLC17A8	GRIA3	Iqsec2,Shank3	ligand-receptor	Neurotransmitter
Glu_GRIA3	ClusterCA2-4_neurons	ClusterEpendymal	0.00192998	GLS,SLC17A6,SLC17A7,SLC17A8	GRIA3	Iqsec2,Shank3	ligand-receptor	Neurotransmitter
Glu_GRIA3	ClusterCA_neurons	ClusterEpendymal	0.001633	GLS,SLC17A6,SLC17A7,SLC17A8	GRIA3	Iqsec2,Shank3	ligand-receptor	Neurotransmitter
Glu_GRIA3	ClusterImmature	ClusterEpendymal	0.00227955	GLS,SLC17A6,SLC17A7,SLC17A8	GRIA3	Iqsec2,Shank3	ligand-receptor	Neurotransmitter
Glu_GRIA3	ClustermGC	ClusterEpendymal	0.00181662	GLS,SLC17A6,SLC17A7,SLC17A8	GRIA3	Iqsec2,Shank3	ligand-receptor	Neurotransmitter
Glu_GRIA3	ClusterCA2-4_neurons	ClusterGABA_neurons	0.0197462	GLS,SLC17A6,SLC17A7,SLC17A8	GRIA3	Iqsec2,Shank3	ligand-receptor	Neurotransmitter
Glu_GRIA3	ClusterCA_neurons	ClusterGABA_neurons	0.0167078	GLS,SLC17A6,SLC17A7,SLC17A8	GRIA3	Iqsec2,Shank3	ligand-receptor	Neurotransmitter
Glu_GRIA3	ClusterImmature	ClusterGABA_neurons	0.0233228	GLS,SLC17A6,SLC17A7,SLC17A8	GRIA3	Iqsec2,Shank3	ligand-receptor	Neurotransmitter
Glu_GRIA3	ClusterNeuroblast	ClusterGABA_neurons	0.0089098	GLS,SLC17A6,SLC17A7,SLC17A8	GRIA3	Iqsec2,Shank3	ligand-receptor	Neurotransmitter
Glu_GRIA3	ClustermGC	ClusterGABA_neurons	0.0185864	GLS,SLC17A6,SLC17A7,SLC17A8	GRIA3	Iqsec2,Shank3	ligand-receptor	Neurotransmitter
Glu_GRIA3	ClusterCA2-4_neurons	ClusterImmature	0.0224003	GLS,SLC17A6,SLC17A7,SLC17A8	GRIA3	Iqsec2,Shank3	ligand-receptor	Neurotransmitter
Glu_GRIA3	ClusterCA_neurons	ClusterImmature	0.0189535	GLS,SLC17A6,SLC17A7,SLC17A8	GRIA3	Iqsec2,Shank3	ligand-receptor	Neurotransmitter
Glu_GRIA3	ClusterImmature	ClusterImmature	0.0264577	GLS,SLC17A6,SLC17A7,SLC17A8	GRIA3	Iqsec2,Shank3	ligand-receptor	Neurotransmitter
Glu_GRIA3	ClusterNeuroblast	ClusterImmature	0.0101074	GLS,SLC17A6,SLC17A7,SLC17A8	GRIA3	Iqsec2,Shank3	ligand-receptor	Neurotransmitter
Glu_GRIA3	ClustermGC	ClusterImmature	0.0210847	GLS,SLC17A6,SLC17A7,SLC17A8	GRIA3	Iqsec2,Shank3	ligand-receptor	Neurotransmitter
Glu_GRIA3	ClusterCA2-4_neurons	ClusterNeuroblast	0.00400658	GLS,SLC17A6,SLC17A7,SLC17A8	GRIA3	Iqsec2,Shank3	ligand-receptor	Neurotransmitter
Glu_GRIA3	ClusterCA_neurons	ClusterNeuroblast	0.00339007	GLS,SLC17A6,SLC17A7,SLC17A8	GRIA3	Iqsec2,Shank3	ligand-receptor	Neurotransmitter
Glu_GRIA3	ClusterImmature	ClusterNeuroblast	0.00473228	GLS,SLC17A6,SLC17A7,SLC17A8	GRIA3	Iqsec2,Shank3	ligand-receptor	Neurotransmitter
Glu_GRIA3	ClusterNeuroblast	ClusterNeuroblast	0.00180784	GLS,SLC17A6,SLC17A7,SLC17A8	GRIA3	Iqsec2,Shank3	ligand-receptor	Neurotransmitter
Glu_GRIA3	ClustermGC	ClusterNeuroblast	0.00377126	GLS,SLC17A6,SLC17A7,SLC17A8	GRIA3	Iqsec2,Shank3	ligand-receptor	Neurotransmitter
Glu_GRIA3	ClusterCA2-4_neurons	ClusterOPCs	0.0195786	GLS,SLC17A6,SLC17A7,SLC17A8	GRIA3	Iqsec2,Shank3	ligand-receptor	Neurotransmitter
Glu_GRIA3	ClusterCA_neurons	ClusterOPCs	0.016566	GLS,SLC17A6,SLC17A7,SLC17A8	GRIA3	Iqsec2,Shank3	ligand-receptor	Neurotransmitter
Glu_GRIA3	ClusterImmature	ClusterOPCs	0.0231249	GLS,SLC17A6,SLC17A7,SLC17A8	GRIA3	Iqsec2,Shank3	ligand-receptor	Neurotransmitter
Glu_GRIA3	ClusterNeuroblast	ClusterOPCs	0.00883421	GLS,SLC17A6,SLC17A7,SLC17A8	GRIA3	Iqsec2,Shank3	ligand-receptor	Neurotransmitter
Glu_GRIA3	ClustermGC	ClusterOPCs	0.0184287	GLS,SLC17A6,SLC17A7,SLC17A8	GRIA3	Iqsec2,Shank3	ligand-receptor	Neurotransmitter
Glu_GRIA3	ClusterCA2-4_neurons	ClustermGC	0.023508	GLS,SLC17A6,SLC17A7,SLC17A8	GRIA3	Iqsec2,Shank3	ligand-receptor	Neurotransmitter
Glu_GRIA3	ClusterCA_neurons	ClustermGC	0.0198908	GLS,SLC17A6,SLC17A7,SLC17A8	GRIA3	Iqsec2,Shank3	ligand-receptor	Neurotransmitter
Glu_GRIA3	ClusterImmature	ClustermGC	0.027766	GLS,SLC17A6,SLC17A7,SLC17A8	GRIA3	Iqsec2,Shank3	ligand-receptor	Neurotransmitter
Glu_GRIA3	ClusterNeuroblast	ClustermGC	0.0106072	GLS,SLC17A6,SLC17A7,SLC17A8	GRIA3	Iqsec2,Shank3	ligand-receptor	Neurotransmitter
Glu_GRIA3	ClustermGC	ClustermGC	0.0221273	GLS,SLC17A6,SLC17A7,SLC17A8	GRIA3	Iqsec2,Shank3	ligand-receptor	Neurotransmitter
Glu_GRIA4	ClusterCA2-4_neurons	ClusterAstrocytes	0.00307305	GLS,SLC17A6,SLC17A7,SLC17A8	GRIA4	Iqsec2,Shank3,Camk2a,Prkcg,Prkca,Prkaca	ligand-receptor	Neurotransmitter
Glu_GRIA4	ClusterCA_neurons	ClusterAstrocytes	0.00260019	GLS,SLC17A6,SLC17A7,SLC17A8	GRIA4	Iqsec2,Shank3,Camk2a,Prkcg,Prkca,Prkaca	ligand-receptor	Neurotransmitter
Glu_GRIA4	ClusterImmature	ClusterAstrocytes	0.00362967	GLS,SLC17A6,SLC17A7,SLC17A8	GRIA4	Iqsec2,Shank3,Camk2a,Prkcg,Prkca,Prkaca	ligand-receptor	Neurotransmitter
Glu_GRIA4	ClusterNeuroblast	ClusterAstrocytes	0.00138661	GLS,SLC17A6,SLC17A7,SLC17A8	GRIA4	Iqsec2,Shank3,Camk2a,Prkcg,Prkca,Prkaca	ligand-receptor	Neurotransmitter
Glu_GRIA4	ClustermGC	ClusterAstrocytes	0.00289256	GLS,SLC17A6,SLC17A7,SLC17A8	GRIA4	Iqsec2,Shank3,Camk2a,Prkcg,Prkca,Prkaca	ligand-receptor	Neurotransmitter
Glu_GRIA4	ClusterCA2-4_neurons	ClusterCA2.4_neurons	0.00201199	GLS,SLC17A6,SLC17A7,SLC17A8	GRIA4	Iqsec2,Shank3,Camk2a,Prkcg,Prkca,Prkaca	ligand-receptor	Neurotransmitter
Glu_GRIA4	ClusterCA_neurons	ClusterCA2.4_neurons	0.00170239	GLS,SLC17A6,SLC17A7,SLC17A8	GRIA4	Iqsec2,Shank3,Camk2a,Prkcg,Prkca,Prkaca	ligand-receptor	Neurotransmitter
Glu_GRIA4	ClusterImmature	ClusterCA2.4_neurons	0.00237641	GLS,SLC17A6,SLC17A7,SLC17A8	GRIA4	Iqsec2,Shank3,Camk2a,Prkcg,Prkca,Prkaca	ligand-receptor	Neurotransmitter
Glu_GRIA4	ClusterNeuroblast	ClusterCA2.4_neurons	0.000907841	GLS,SLC17A6,SLC17A7,SLC17A8	GRIA4	Iqsec2,Shank3,Camk2a,Prkcg,Prkca,Prkaca	ligand-receptor	Neurotransmitter
Glu_GRIA4	ClustermGC	ClusterCA2.4_neurons	0.00189381	GLS,SLC17A6,SLC17A7,SLC17A8	GRIA4	Iqsec2,Shank3,Camk2a,Prkcg,Prkca,Prkaca	ligand-receptor	Neurotransmitter
Glu_GRIA4	ClusterCA2-4_neurons	ClusterCA_neurons	0.0206331	GLS,SLC17A6,SLC17A7,SLC17A8	GRIA4	Iqsec2,Shank3,Camk2a,Prkcg,Prkca,Prkaca	ligand-receptor	Neurotransmitter
Glu_GRIA4	ClusterCA_neurons	ClusterCA_neurons	0.0174582	GLS,SLC17A6,SLC17A7,SLC17A8	GRIA4	Iqsec2,Shank3,Camk2a,Prkcg,Prkca,Prkaca	ligand-receptor	Neurotransmitter
Glu_GRIA4	ClusterImmature	ClusterCA_neurons	0.0243703	GLS,SLC17A6,SLC17A7,SLC17A8	GRIA4	Iqsec2,Shank3,Camk2a,Prkcg,Prkca,Prkaca	ligand-receptor	Neurotransmitter
Glu_GRIA4	ClusterNeuroblast	ClusterCA_neurons	0.00930999	GLS,SLC17A6,SLC17A7,SLC17A8	GRIA4	Iqsec2,Shank3,Camk2a,Prkcg,Prkca,Prkaca	ligand-receptor	Neurotransmitter
Glu_GRIA4	ClustermGC	ClusterCA_neurons	0.0194212	GLS,SLC17A6,SLC17A7,SLC17A8	GRIA4	Iqsec2,Shank3,Camk2a,Prkcg,Prkca,Prkaca	ligand-receptor	Neurotransmitter
Glu_GRIA4	ClusterCA2-4_neurons	ClusterEpendymal	0.00281624	GLS,SLC17A6,SLC17A7,SLC17A8	GRIA4	Iqsec2,Shank3,Camk2a,Prkcg,Prkca,Prkaca	ligand-receptor	Neurotransmitter
Glu_GRIA4	ClusterCA_neurons	ClusterEpendymal	0.0023829	GLS,SLC17A6,SLC17A7,SLC17A8	GRIA4	Iqsec2,Shank3,Camk2a,Prkcg,Prkca,Prkaca	ligand-receptor	Neurotransmitter
Glu_GRIA4	ClusterImmature	ClusterEpendymal	0.00332634	GLS,SLC17A6,SLC17A7,SLC17A8	GRIA4	Iqsec2,Shank3,Camk2a,Prkcg,Prkca,Prkaca	ligand-receptor	Neurotransmitter
Glu_GRIA4	ClusterNeuroblast	ClusterEpendymal	0.00127073	GLS,SLC17A6,SLC17A7,SLC17A8	GRIA4	Iqsec2,Shank3,Camk2a,Prkcg,Prkca,Prkaca	ligand-receptor	Neurotransmitter
Glu_GRIA4	ClustermGC	ClusterEpendymal	0.00265083	GLS,SLC17A6,SLC17A7,SLC17A8	GRIA4	Iqsec2,Shank3,Camk2a,Prkcg,Prkca,Prkaca	ligand-receptor	Neurotransmitter
Glu_GRIA4	ClusterCA2-4_neurons	ClusterGABA_neurons	0.0279232	GLS,SLC17A6,SLC17A7,SLC17A8	GRIA4	Iqsec2,Shank3,Camk2a,Prkcg,Prkca,Prkaca	ligand-receptor	Neurotransmitter
Glu_GRIA4	ClusterCA_neurons	ClusterGABA_neurons	0.0236265	GLS,SLC17A6,SLC17A7,SLC17A8	GRIA4	Iqsec2,Shank3,Camk2a,Prkcg,Prkca,Prkaca	ligand-receptor	Neurotransmitter
Glu_GRIA4	ClusterImmature	ClusterGABA_neurons	0.0329809	GLS,SLC17A6,SLC17A7,SLC17A8	GRIA4	Iqsec2,Shank3,Camk2a,Prkcg,Prkca,Prkaca	ligand-receptor	Neurotransmitter
Glu_GRIA4	ClusterNeuroblast	ClusterGABA_neurons	0.0125994	GLS,SLC17A6,SLC17A7,SLC17A8	GRIA4	Iqsec2,Shank3,Camk2a,Prkcg,Prkca,Prkaca	ligand-receptor	Neurotransmitter
Glu_GRIA4	ClustermGC	ClusterGABA_neurons	0.0262831	GLS,SLC17A6,SLC17A7,SLC17A8	GRIA4	Iqsec2,Shank3,Camk2a,Prkcg,Prkca,Prkaca	ligand-receptor	Neurotransmitter
Glu_GRIA4	ClusterCA2-4_neurons	ClusterImmature	0.0256213	GLS,SLC17A6,SLC17A7,SLC17A8	GRIA4	Iqsec2,Shank3,Camk2a,Prkcg,Prkca,Prkaca	ligand-receptor	Neurotransmitter
Glu_GRIA4	ClusterCA_neurons	ClusterImmature	0.0216788	GLS,SLC17A6,SLC17A7,SLC17A8	GRIA4	Iqsec2,Shank3,Camk2a,Prkcg,Prkca,Prkaca	ligand-receptor	Neurotransmitter
Glu_GRIA4	ClusterImmature	ClusterImmature	0.030262	GLS,SLC17A6,SLC17A7,SLC17A8	GRIA4	Iqsec2,Shank3,Camk2a,Prkcg,Prkca,Prkaca	ligand-receptor	Neurotransmitter
Glu_GRIA4	ClusterNeuroblast	ClusterImmature	0.0115607	GLS,SLC17A6,SLC17A7,SLC17A8	GRIA4	Iqsec2,Shank3,Camk2a,Prkcg,Prkca,Prkaca	ligand-receptor	Neurotransmitter
Glu_GRIA4	ClustermGC	ClusterImmature	0.0241164	GLS,SLC17A6,SLC17A7,SLC17A8	GRIA4	Iqsec2,Shank3,Camk2a,Prkcg,Prkca,Prkaca	ligand-receptor	Neurotransmitter
Glu_GRIA4	ClusterCA2-4_neurons	ClusterNeuroblast	0.00901282	GLS,SLC17A6,SLC17A7,SLC17A8	GRIA4	Iqsec2,Shank3,Camk2a,Prkcg,Prkca,Prkaca	ligand-receptor	Neurotransmitter
Glu_GRIA4	ClusterCA_neurons	ClusterNeuroblast	0.00762598	GLS,SLC17A6,SLC17A7,SLC17A8	GRIA4	Iqsec2,Shank3,Camk2a,Prkcg,Prkca,Prkaca	ligand-receptor	Neurotransmitter
Glu_GRIA4	ClusterImmature	ClusterNeuroblast	0.0106453	GLS,SLC17A6,SLC17A7,SLC17A8	GRIA4	Iqsec2,Shank3,Camk2a,Prkcg,Prkca,Prkaca	ligand-receptor	Neurotransmitter
Glu_GRIA4	ClusterNeuroblast	ClusterNeuroblast	0.00406673	GLS,SLC17A6,SLC17A7,SLC17A8	GRIA4	Iqsec2,Shank3,Camk2a,Prkcg,Prkca,Prkaca	ligand-receptor	Neurotransmitter
Glu_GRIA4	ClustermGC	ClusterNeuroblast	0.00848345	GLS,SLC17A6,SLC17A7,SLC17A8	GRIA4	Iqsec2,Shank3,Camk2a,Prkcg,Prkca,Prkaca	ligand-receptor	Neurotransmitter
Glu_GRIA4	ClusterCA2-4_neurons	ClusterOPCs	0.032606	GLS,SLC17A6,SLC17A7,SLC17A8	GRIA4	Iqsec2,Shank3,Camk2a,Prkcg,Prkca,Prkaca	ligand-receptor	Neurotransmitter
Glu_GRIA4	ClusterCA_neurons	ClusterOPCs	0.0275888	GLS,SLC17A6,SLC17A7,SLC17A8	GRIA4	Iqsec2,Shank3,Camk2a,Prkcg,Prkca,Prkaca	ligand-receptor	Neurotransmitter
Glu_GRIA4	ClusterImmature	ClusterOPCs	0.0385119	GLS,SLC17A6,SLC17A7,SLC17A8	GRIA4	Iqsec2,Shank3,Camk2a,Prkcg,Prkca,Prkaca	ligand-receptor	Neurotransmitter
Glu_GRIA4	ClusterNeuroblast	ClusterOPCs	0.0147124	GLS,SLC17A6,SLC17A7,SLC17A8	GRIA4	Iqsec2,Shank3,Camk2a,Prkcg,Prkca,Prkaca	ligand-receptor	Neurotransmitter
Glu_GRIA4	ClustermGC	ClusterOPCs	0.0306909	GLS,SLC17A6,SLC17A7,SLC17A8	GRIA4	Iqsec2,Shank3,Camk2a,Prkcg,Prkca,Prkaca	ligand-receptor	Neurotransmitter
Glu_GRIA4	ClusterCA2-4_neurons	ClustermGC	0.0252834	GLS,SLC17A6,SLC17A7,SLC17A8	GRIA4	Iqsec2,Shank3,Camk2a,Prkcg,Prkca,Prkaca	ligand-receptor	Neurotransmitter
Glu_GRIA4	ClusterCA_neurons	ClustermGC	0.0213929	GLS,SLC17A6,SLC17A7,SLC17A8	GRIA4	Iqsec2,Shank3,Camk2a,Prkcg,Prkca,Prkaca	ligand-receptor	Neurotransmitter
Glu_GRIA4	ClusterImmature	ClustermGC	0.0298629	GLS,SLC17A6,SLC17A7,SLC17A8	GRIA4	Iqsec2,Shank3,Camk2a,Prkcg,Prkca,Prkaca	ligand-receptor	Neurotransmitter
Glu_GRIA4	ClusterNeuroblast	ClustermGC	0.0114083	GLS,SLC17A6,SLC17A7,SLC17A8	GRIA4	Iqsec2,Shank3,Camk2a,Prkcg,Prkca,Prkaca	ligand-receptor	Neurotransmitter
Glu_GRIA4	ClustermGC	ClustermGC	0.0237983	GLS,SLC17A6,SLC17A7,SLC17A8	GRIA4	Iqsec2,Shank3,Camk2a,Prkcg,Prkca,Prkaca	ligand-receptor	Neurotransmitter
Glu_GRIA4	ClusterCA2-4_neurons	ClustermOli	0.0150174	GLS,SLC17A6,SLC17A7,SLC17A8	GRIA4	Iqsec2,Shank3,Camk2a,Prkcg,Prkca,Prkaca	ligand-receptor	Neurotransmitter
Glu_GRIA4	ClusterCA_neurons	ClustermOli	0.0127066	GLS,SLC17A6,SLC17A7,SLC17A8	GRIA4	Iqsec2,Shank3,Camk2a,Prkcg,Prkca,Prkaca	ligand-receptor	Neurotransmitter
Glu_GRIA4	ClusterImmature	ClustermOli	0.0177375	GLS,SLC17A6,SLC17A7,SLC17A8	GRIA4	Iqsec2,Shank3,Camk2a,Prkcg,Prkca,Prkaca	ligand-receptor	Neurotransmitter
Glu_GRIA4	ClusterNeuroblast	ClustermOli	0.0067761	GLS,SLC17A6,SLC17A7,SLC17A8	GRIA4	Iqsec2,Shank3,Camk2a,Prkcg,Prkca,Prkaca	ligand-receptor	Neurotransmitter
Glu_GRIA4	ClustermGC	ClustermOli	0.0141353	GLS,SLC17A6,SLC17A7,SLC17A8	GRIA4	Iqsec2,Shank3,Camk2a,Prkcg,Prkca,Prkaca	ligand-receptor	Neurotransmitter
Glu_GRIK1	ClusterCA2-4_neurons	ClusterCA2.4_neurons	0.0100561	GLS,SLC17A6,SLC17A7,SLC17A8	GRIK1	Prkaca,Prkca	ligand-receptor	Neurotransmitter
Glu_GRIK1	ClusterCA_neurons	ClusterCA2.4_neurons	0.00850871	GLS,SLC17A6,SLC17A7,SLC17A8	GRIK1	Prkaca,Prkca	ligand-receptor	Neurotransmitter
Glu_GRIK1	ClusterImmature	ClusterCA2.4_neurons	0.0118775	GLS,SLC17A6,SLC17A7,SLC17A8	GRIK1	Prkaca,Prkca	ligand-receptor	Neurotransmitter
Glu_GRIK1	ClusterNeuroblast	ClusterCA2.4_neurons	0.00453747	GLS,SLC17A6,SLC17A7,SLC17A8	GRIK1	Prkaca,Prkca	ligand-receptor	Neurotransmitter
Glu_GRIK1	ClustermGC	ClusterCA2.4_neurons	0.00946543	GLS,SLC17A6,SLC17A7,SLC17A8	GRIK1	Prkaca,Prkca	ligand-receptor	Neurotransmitter
Glu_GRIK1	ClusterCA2-4_neurons	ClusterCA_neurons	0.000853318	GLS,SLC17A6,SLC17A7,SLC17A8	GRIK1	Prkaca,Prkca	ligand-receptor	Neurotransmitter
Glu_GRIK1	ClusterCA_neurons	ClusterCA_neurons	0.000722015	GLS,SLC17A6,SLC17A7,SLC17A8	GRIK1	Prkaca,Prkca	ligand-receptor	Neurotransmitter
Glu_GRIK1	ClusterImmature	ClusterCA_neurons	0.00100788	GLS,SLC17A6,SLC17A7,SLC17A8	GRIK1	Prkaca,Prkca	ligand-receptor	Neurotransmitter
Glu_GRIK1	ClusterNeuroblast	ClusterCA_neurons	0.000385031	GLS,SLC17A6,SLC17A7,SLC17A8	GRIK1	Prkaca,Prkca	ligand-receptor	Neurotransmitter
Glu_GRIK1	ClustermGC	ClusterCA_neurons	0.000803199	GLS,SLC17A6,SLC17A7,SLC17A8	GRIK1	Prkaca,Prkca	ligand-receptor	Neurotransmitter
Glu_GRIK1	ClusterCA2-4_neurons	ClusterGABA_neurons	0.0230439	GLS,SLC17A6,SLC17A7,SLC17A8	GRIK1	Prkaca,Prkca	ligand-receptor	Neurotransmitter
Glu_GRIK1	ClusterCA_neurons	ClusterGABA_neurons	0.019498	GLS,SLC17A6,SLC17A7,SLC17A8	GRIK1	Prkaca,Prkca	ligand-receptor	Neurotransmitter
Glu_GRIK1	ClusterImmature	ClusterGABA_neurons	0.0272178	GLS,SLC17A6,SLC17A7,SLC17A8	GRIK1	Prkaca,Prkca	ligand-receptor	Neurotransmitter
Glu_GRIK1	ClusterNeuroblast	ClusterGABA_neurons	0.0103978	GLS,SLC17A6,SLC17A7,SLC17A8	GRIK1	Prkaca,Prkca	ligand-receptor	Neurotransmitter
Glu_GRIK1	ClustermGC	ClusterGABA_neurons	0.0216904	GLS,SLC17A6,SLC17A7,SLC17A8	GRIK1	Prkaca,Prkca	ligand-receptor	Neurotransmitter
Glu_GRIK1	ClusterCA2-4_neurons	ClusterOPCs	0.0304909	GLS,SLC17A6,SLC17A7,SLC17A8	GRIK1	Prkaca,Prkca	ligand-receptor	Neurotransmitter
Glu_GRIK1	ClusterCA_neurons	ClusterOPCs	0.0257992	GLS,SLC17A6,SLC17A7,SLC17A8	GRIK1	Prkaca,Prkca	ligand-receptor	Neurotransmitter
Glu_GRIK1	ClusterImmature	ClusterOPCs	0.0360137	GLS,SLC17A6,SLC17A7,SLC17A8	GRIK1	Prkaca,Prkca	ligand-receptor	Neurotransmitter
Glu_GRIK1	ClusterNeuroblast	ClusterOPCs	0.013758	GLS,SLC17A6,SLC17A7,SLC17A8	GRIK1	Prkaca,Prkca	ligand-receptor	Neurotransmitter
Glu_GRIK1	ClustermGC	ClusterOPCs	0.0287	GLS,SLC17A6,SLC17A7,SLC17A8	GRIK1	Prkaca,Prkca	ligand-receptor	Neurotransmitter
Glu_GRIK2	ClusterCA2-4_neurons	ClusterAstrocytes	0.00317087	GLS,SLC17A6,SLC17A7,SLC17A8	GRIK2	Prkaca	ligand-receptor	Neurotransmitter
Glu_GRIK2	ClusterCA_neurons	ClusterAstrocytes	0.00268295	GLS,SLC17A6,SLC17A7,SLC17A8	GRIK2	Prkaca	ligand-receptor	Neurotransmitter
Glu_GRIK2	ClusterImmature	ClusterAstrocytes	0.0037452	GLS,SLC17A6,SLC17A7,SLC17A8	GRIK2	Prkaca	ligand-receptor	Neurotransmitter
Glu_GRIK2	ClustermGC	ClusterAstrocytes	0.00298463	GLS,SLC17A6,SLC17A7,SLC17A8	GRIK2	Prkaca	ligand-receptor	Neurotransmitter
Glu_GRIK2	ClusterCA2-4_neurons	ClusterCA2.4_neurons	0.040283	GLS,SLC17A6,SLC17A7,SLC17A8	GRIK2	Prkaca	ligand-receptor	Neurotransmitter
Glu_GRIK2	ClusterCA_neurons	ClusterCA2.4_neurons	0.0340845	GLS,SLC17A6,SLC17A7,SLC17A8	GRIK2	Prkaca	ligand-receptor	Neurotransmitter
Glu_GRIK2	ClusterImmature	ClusterCA2.4_neurons	0.0475794	GLS,SLC17A6,SLC17A7,SLC17A8	GRIK2	Prkaca	ligand-receptor	Neurotransmitter
Glu_GRIK2	ClusterNeuroblast	ClusterCA2.4_neurons	0.0181764	GLS,SLC17A6,SLC17A7,SLC17A8	GRIK2	Prkaca	ligand-receptor	Neurotransmitter
Glu_GRIK2	ClustermGC	ClusterCA2.4_neurons	0.037917	GLS,SLC17A6,SLC17A7,SLC17A8	GRIK2	Prkaca	ligand-receptor	Neurotransmitter
Glu_GRIK2	ClusterCA2-4_neurons	ClusterCA_neurons	0.0338843	GLS,SLC17A6,SLC17A7,SLC17A8	GRIK2	Prkaca	ligand-receptor	Neurotransmitter
Glu_GRIK2	ClusterCA_neurons	ClusterCA_neurons	0.0286704	GLS,SLC17A6,SLC17A7,SLC17A8	GRIK2	Prkaca	ligand-receptor	Neurotransmitter
Glu_GRIK2	ClusterImmature	ClusterCA_neurons	0.0400216	GLS,SLC17A6,SLC17A7,SLC17A8	GRIK2	Prkaca	ligand-receptor	Neurotransmitter
Glu_GRIK2	ClusterNeuroblast	ClusterCA_neurons	0.0152891	GLS,SLC17A6,SLC17A7,SLC17A8	GRIK2	Prkaca	ligand-receptor	Neurotransmitter
Glu_GRIK2	ClustermGC	ClusterCA_neurons	0.0318941	GLS,SLC17A6,SLC17A7,SLC17A8	GRIK2	Prkaca	ligand-receptor	Neurotransmitter
Glu_GRIK2	ClusterCA2-4_neurons	ClusterEpendymal	0.00337794	GLS,SLC17A6,SLC17A7,SLC17A8	GRIK2	Prkaca	ligand-receptor	Neurotransmitter
Glu_GRIK2	ClusterCA_neurons	ClusterEpendymal	0.00285816	GLS,SLC17A6,SLC17A7,SLC17A8	GRIK2	Prkaca	ligand-receptor	Neurotransmitter
Glu_GRIK2	ClusterImmature	ClusterEpendymal	0.00398978	GLS,SLC17A6,SLC17A7,SLC17A8	GRIK2	Prkaca	ligand-receptor	Neurotransmitter
Glu_GRIK2	ClustermGC	ClusterEpendymal	0.00317953	GLS,SLC17A6,SLC17A7,SLC17A8	GRIK2	Prkaca	ligand-receptor	Neurotransmitter
Glu_GRIK2	ClusterCA2-4_neurons	ClusterGABA_neurons	0.045562	GLS,SLC17A6,SLC17A7,SLC17A8	GRIK2	Prkaca	ligand-receptor	Neurotransmitter
Glu_GRIK2	ClusterCA_neurons	ClusterGABA_neurons	0.0385512	GLS,SLC17A6,SLC17A7,SLC17A8	GRIK2	Prkaca	ligand-receptor	Neurotransmitter
Glu_GRIK2	ClusterImmature	ClusterGABA_neurons	0.0538146	GLS,SLC17A6,SLC17A7,SLC17A8	GRIK2	Prkaca	ligand-receptor	Neurotransmitter
Glu_GRIK2	ClusterNeuroblast	ClusterGABA_neurons	0.0205583	GLS,SLC17A6,SLC17A7,SLC17A8	GRIK2	Prkaca	ligand-receptor	Neurotransmitter
Glu_GRIK2	ClustermGC	ClusterGABA_neurons	0.0428859	GLS,SLC17A6,SLC17A7,SLC17A8	GRIK2	Prkaca	ligand-receptor	Neurotransmitter
Glu_GRIK2	ClusterCA2-4_neurons	ClusterImmature	0.0417457	GLS,SLC17A6,SLC17A7,SLC17A8	GRIK2	Prkaca	ligand-receptor	Neurotransmitter
Glu_GRIK2	ClusterCA_neurons	ClusterImmature	0.0353221	GLS,SLC17A6,SLC17A7,SLC17A8	GRIK2	Prkaca	ligand-receptor	Neurotransmitter
Glu_GRIK2	ClusterImmature	ClusterImmature	0.049307	GLS,SLC17A6,SLC17A7,SLC17A8	GRIK2	Prkaca	ligand-receptor	Neurotransmitter
Glu_GRIK2	ClusterNeuroblast	ClusterImmature	0.0188363	GLS,SLC17A6,SLC17A7,SLC17A8	GRIK2	Prkaca	ligand-receptor	Neurotransmitter
Glu_GRIK2	ClustermGC	ClusterImmature	0.0392937	GLS,SLC17A6,SLC17A7,SLC17A8	GRIK2	Prkaca	ligand-receptor	Neurotransmitter
Glu_GRIK2	ClusterCA2-4_neurons	ClusterNeural.Stem	0.00162575	GLS,SLC17A6,SLC17A7,SLC17A8	GRIK2	Prkaca	ligand-receptor	Neurotransmitter
Glu_GRIK2	ClusterCA_neurons	ClusterNeural.Stem	0.00137559	GLS,SLC17A6,SLC17A7,SLC17A8	GRIK2	Prkaca	ligand-receptor	Neurotransmitter
Glu_GRIK2	ClusterImmature	ClusterNeural.Stem	0.00192022	GLS,SLC17A6,SLC17A7,SLC17A8	GRIK2	Prkaca	ligand-receptor	Neurotransmitter
Glu_GRIK2	ClustermGC	ClusterNeural.Stem	0.00153026	GLS,SLC17A6,SLC17A7,SLC17A8	GRIK2	Prkaca	ligand-receptor	Neurotransmitter
Glu_GRIK2	ClusterCA2-4_neurons	ClusterOPCs	0.0395757	GLS,SLC17A6,SLC17A7,SLC17A8	GRIK2	Prkaca	ligand-receptor	Neurotransmitter
Glu_GRIK2	ClusterCA_neurons	ClusterOPCs	0.033486	GLS,SLC17A6,SLC17A7,SLC17A8	GRIK2	Prkaca	ligand-receptor	Neurotransmitter
Glu_GRIK2	ClusterImmature	ClusterOPCs	0.046744	GLS,SLC17A6,SLC17A7,SLC17A8	GRIK2	Prkaca	ligand-receptor	Neurotransmitter
Glu_GRIK2	ClusterNeuroblast	ClusterOPCs	0.0178572	GLS,SLC17A6,SLC17A7,SLC17A8	GRIK2	Prkaca	ligand-receptor	Neurotransmitter
Glu_GRIK2	ClustermGC	ClusterOPCs	0.0372512	GLS,SLC17A6,SLC17A7,SLC17A8	GRIK2	Prkaca	ligand-receptor	Neurotransmitter
Glu_GRIK2	ClusterCA2-4_neurons	ClustermGC	0.0436635	GLS,SLC17A6,SLC17A7,SLC17A8	GRIK2	Prkaca	ligand-receptor	Neurotransmitter
Glu_GRIK2	ClusterCA_neurons	ClustermGC	0.0369448	GLS,SLC17A6,SLC17A7,SLC17A8	GRIK2	Prkaca	ligand-receptor	Neurotransmitter
Glu_GRIK2	ClusterImmature	ClustermGC	0.0515722	GLS,SLC17A6,SLC17A7,SLC17A8	GRIK2	Prkaca	ligand-receptor	Neurotransmitter
Glu_GRIK2	ClusterNeuroblast	ClustermGC	0.0197017	GLS,SLC17A6,SLC17A7,SLC17A8	GRIK2	Prkaca	ligand-receptor	Neurotransmitter
Glu_GRIK2	ClustermGC	ClustermGC	0.0410989	GLS,SLC17A6,SLC17A7,SLC17A8	GRIK2	Prkaca	ligand-receptor	Neurotransmitter
Glu_GRIK3	ClusterCA2-4_neurons	ClusterGABA_neurons	0.00328472	GLS,SLC17A6,SLC17A7,SLC17A8	GRIK3		ligand-receptor	Neurotransmitter
Glu_GRIK3	ClusterCA_neurons	ClusterGABA_neurons	0.00277929	GLS,SLC17A6,SLC17A7,SLC17A8	GRIK3		ligand-receptor	Neurotransmitter
Glu_GRIK3	ClusterImmature	ClusterGABA_neurons	0.00387967	GLS,SLC17A6,SLC17A7,SLC17A8	GRIK3		ligand-receptor	Neurotransmitter
Glu_GRIK3	ClusterNeuroblast	ClusterGABA_neurons	0.00148212	GLS,SLC17A6,SLC17A7,SLC17A8	GRIK3		ligand-receptor	Neurotransmitter
Glu_GRIK3	ClustermGC	ClusterGABA_neurons	0.00309179	GLS,SLC17A6,SLC17A7,SLC17A8	GRIK3		ligand-receptor	Neurotransmitter
Glu_GRIK3	ClusterCA2-4_neurons	ClusterOPCs	0.0040997	GLS,SLC17A6,SLC17A7,SLC17A8	GRIK3		ligand-receptor	Neurotransmitter
Glu_GRIK3	ClusterCA_neurons	ClusterOPCs	0.00346886	GLS,SLC17A6,SLC17A7,SLC17A8	GRIK3		ligand-receptor	Neurotransmitter
Glu_GRIK3	ClusterImmature	ClusterOPCs	0.00484227	GLS,SLC17A6,SLC17A7,SLC17A8	GRIK3		ligand-receptor	Neurotransmitter
Glu_GRIK3	ClusterNeuroblast	ClusterOPCs	0.00184985	GLS,SLC17A6,SLC17A7,SLC17A8	GRIK3		ligand-receptor	Neurotransmitter
Glu_GRIK3	ClustermGC	ClusterOPCs	0.0038589	GLS,SLC17A6,SLC17A7,SLC17A8	GRIK3		ligand-receptor	Neurotransmitter
Glu_GRIK4	ClusterCA2-4_neurons	ClusterAstrocytes	0.00426495	GLS,SLC17A6,SLC17A7,SLC17A8	GRIK4		ligand-receptor	Neurotransmitter
Glu_GRIK4	ClusterCA_neurons	ClusterAstrocytes	0.00360869	GLS,SLC17A6,SLC17A7,SLC17A8	GRIK4		ligand-receptor	Neurotransmitter
Glu_GRIK4	ClusterImmature	ClusterAstrocytes	0.00503745	GLS,SLC17A6,SLC17A7,SLC17A8	GRIK4		ligand-receptor	Neurotransmitter
Glu_GRIK4	ClusterNeuroblast	ClusterAstrocytes	0.00192442	GLS,SLC17A6,SLC17A7,SLC17A8	GRIK4		ligand-receptor	Neurotransmitter
Glu_GRIK4	ClustermGC	ClusterAstrocytes	0.00401445	GLS,SLC17A6,SLC17A7,SLC17A8	GRIK4		ligand-receptor	Neurotransmitter
Glu_GRIK4	ClusterCA2-4_neurons	ClusterCA2.4_neurons	0.0158801	GLS,SLC17A6,SLC17A7,SLC17A8	GRIK4		ligand-receptor	Neurotransmitter
Glu_GRIK4	ClusterCA_neurons	ClusterCA2.4_neurons	0.0134366	GLS,SLC17A6,SLC17A7,SLC17A8	GRIK4		ligand-receptor	Neurotransmitter
Glu_GRIK4	ClusterImmature	ClusterCA2.4_neurons	0.0187565	GLS,SLC17A6,SLC17A7,SLC17A8	GRIK4		ligand-receptor	Neurotransmitter
Glu_GRIK4	ClusterNeuroblast	ClusterCA2.4_neurons	0.00716538	GLS,SLC17A6,SLC17A7,SLC17A8	GRIK4		ligand-receptor	Neurotransmitter
Glu_GRIK4	ClustermGC	ClusterCA2.4_neurons	0.0149474	GLS,SLC17A6,SLC17A7,SLC17A8	GRIK4		ligand-receptor	Neurotransmitter
Glu_GRIK4	ClusterCA2-4_neurons	ClusterCA_neurons	0.0138248	GLS,SLC17A6,SLC17A7,SLC17A8	GRIK4		ligand-receptor	Neurotransmitter
Glu_GRIK4	ClusterCA_neurons	ClusterCA_neurons	0.0116975	GLS,SLC17A6,SLC17A7,SLC17A8	GRIK4		ligand-receptor	Neurotransmitter
Glu_GRIK4	ClusterImmature	ClusterCA_neurons	0.0163288	GLS,SLC17A6,SLC17A7,SLC17A8	GRIK4		ligand-receptor	Neurotransmitter
Glu_GRIK4	ClusterNeuroblast	ClusterCA_neurons	0.00623796	GLS,SLC17A6,SLC17A7,SLC17A8	GRIK4		ligand-receptor	Neurotransmitter
Glu_GRIK4	ClustermGC	ClusterCA_neurons	0.0130128	GLS,SLC17A6,SLC17A7,SLC17A8	GRIK4		ligand-receptor	Neurotransmitter
Glu_GRIK4	ClusterCA2-4_neurons	ClusterEpendymal	0.00834853	GLS,SLC17A6,SLC17A7,SLC17A8	GRIK4		ligand-receptor	Neurotransmitter
Glu_GRIK4	ClusterCA_neurons	ClusterEpendymal	0.0070639	GLS,SLC17A6,SLC17A7,SLC17A8	GRIK4		ligand-receptor	Neurotransmitter
Glu_GRIK4	ClusterImmature	ClusterEpendymal	0.00986068	GLS,SLC17A6,SLC17A7,SLC17A8	GRIK4		ligand-receptor	Neurotransmitter
Glu_GRIK4	ClusterNeuroblast	ClusterEpendymal	0.00376699	GLS,SLC17A6,SLC17A7,SLC17A8	GRIK4		ligand-receptor	Neurotransmitter
Glu_GRIK4	ClustermGC	ClusterEpendymal	0.00785818	GLS,SLC17A6,SLC17A7,SLC17A8	GRIK4		ligand-receptor	Neurotransmitter
Glu_GRIK4	ClusterCA2-4_neurons	ClusterGABA_neurons	0.00315636	GLS,SLC17A6,SLC17A7,SLC17A8	GRIK4		ligand-receptor	Neurotransmitter
Glu_GRIK4	ClusterCA_neurons	ClusterGABA_neurons	0.00267068	GLS,SLC17A6,SLC17A7,SLC17A8	GRIK4		ligand-receptor	Neurotransmitter
Glu_GRIK4	ClusterImmature	ClusterGABA_neurons	0.00372806	GLS,SLC17A6,SLC17A7,SLC17A8	GRIK4		ligand-receptor	Neurotransmitter
Glu_GRIK4	ClusterNeuroblast	ClusterGABA_neurons	0.0014242	GLS,SLC17A6,SLC17A7,SLC17A8	GRIK4		ligand-receptor	Neurotransmitter
Glu_GRIK4	ClustermGC	ClusterGABA_neurons	0.00297097	GLS,SLC17A6,SLC17A7,SLC17A8	GRIK4		ligand-receptor	Neurotransmitter
Glu_GRIK4	ClusterCA2-4_neurons	ClusterImmature	0.0144796	GLS,SLC17A6,SLC17A7,SLC17A8	GRIK4		ligand-receptor	Neurotransmitter
Glu_GRIK4	ClusterCA_neurons	ClusterImmature	0.0122515	GLS,SLC17A6,SLC17A7,SLC17A8	GRIK4		ligand-receptor	Neurotransmitter
Glu_GRIK4	ClusterImmature	ClusterImmature	0.0171022	GLS,SLC17A6,SLC17A7,SLC17A8	GRIK4		ligand-receptor	Neurotransmitter
Glu_GRIK4	ClusterNeuroblast	ClusterImmature	0.00653342	GLS,SLC17A6,SLC17A7,SLC17A8	GRIK4		ligand-receptor	Neurotransmitter
Glu_GRIK4	ClustermGC	ClusterImmature	0.0136291	GLS,SLC17A6,SLC17A7,SLC17A8	GRIK4		ligand-receptor	Neurotransmitter
Glu_GRIK4	ClusterCA2-4_neurons	ClusterNeural.Stem	0.00383994	GLS,SLC17A6,SLC17A7,SLC17A8	GRIK4		ligand-receptor	Neurotransmitter
Glu_GRIK4	ClusterCA_neurons	ClusterNeural.Stem	0.00324908	GLS,SLC17A6,SLC17A7,SLC17A8	GRIK4		ligand-receptor	Neurotransmitter
Glu_GRIK4	ClusterImmature	ClusterNeural.Stem	0.00453546	GLS,SLC17A6,SLC17A7,SLC17A8	GRIK4		ligand-receptor	Neurotransmitter
Glu_GRIK4	ClusterNeuroblast	ClusterNeural.Stem	0.00173265	GLS,SLC17A6,SLC17A7,SLC17A8	GRIK4		ligand-receptor	Neurotransmitter
Glu_GRIK4	ClustermGC	ClusterNeural.Stem	0.00361441	GLS,SLC17A6,SLC17A7,SLC17A8	GRIK4		ligand-receptor	Neurotransmitter
Glu_GRIK4	ClusterCA2-4_neurons	ClusterOPCs	0.012002	GLS,SLC17A6,SLC17A7,SLC17A8	GRIK4		ligand-receptor	Neurotransmitter
Glu_GRIK4	ClusterCA_neurons	ClusterOPCs	0.0101552	GLS,SLC17A6,SLC17A7,SLC17A8	GRIK4		ligand-receptor	Neurotransmitter
Glu_GRIK4	ClusterImmature	ClusterOPCs	0.0141759	GLS,SLC17A6,SLC17A7,SLC17A8	GRIK4		ligand-receptor	Neurotransmitter
Glu_GRIK4	ClusterNeuroblast	ClusterOPCs	0.00541549	GLS,SLC17A6,SLC17A7,SLC17A8	GRIK4		ligand-receptor	Neurotransmitter
Glu_GRIK4	ClustermGC	ClusterOPCs	0.011297	GLS,SLC17A6,SLC17A7,SLC17A8	GRIK4		ligand-receptor	Neurotransmitter
Glu_GRIK4	ClusterCA2-4_neurons	ClustermGC	0.0137995	GLS,SLC17A6,SLC17A7,SLC17A8	GRIK4		ligand-receptor	Neurotransmitter
Glu_GRIK4	ClusterCA_neurons	ClustermGC	0.0116761	GLS,SLC17A6,SLC17A7,SLC17A8	GRIK4		ligand-receptor	Neurotransmitter
Glu_GRIK4	ClusterImmature	ClustermGC	0.016299	GLS,SLC17A6,SLC17A7,SLC17A8	GRIK4		ligand-receptor	Neurotransmitter
Glu_GRIK4	ClusterNeuroblast	ClustermGC	0.00622657	GLS,SLC17A6,SLC17A7,SLC17A8	GRIK4		ligand-receptor	Neurotransmitter
Glu_GRIK4	ClustermGC	ClustermGC	0.012989	GLS,SLC17A6,SLC17A7,SLC17A8	GRIK4		ligand-receptor	Neurotransmitter
Glu_GRIK5	ClusterCA2-4_neurons	ClusterCA2.4_neurons	0.00711382	GLS,SLC17A6,SLC17A7,SLC17A8	GRIK5		ligand-receptor	Neurotransmitter
Glu_GRIK5	ClusterCA_neurons	ClusterCA2.4_neurons	0.00601919	GLS,SLC17A6,SLC17A7,SLC17A8	GRIK5		ligand-receptor	Neurotransmitter
Glu_GRIK5	ClusterImmature	ClusterCA2.4_neurons	0.00840233	GLS,SLC17A6,SLC17A7,SLC17A8	GRIK5		ligand-receptor	Neurotransmitter
Glu_GRIK5	ClusterNeuroblast	ClusterCA2.4_neurons	0.00320987	GLS,SLC17A6,SLC17A7,SLC17A8	GRIK5		ligand-receptor	Neurotransmitter
Glu_GRIK5	ClustermGC	ClusterCA2.4_neurons	0.00669599	GLS,SLC17A6,SLC17A7,SLC17A8	GRIK5		ligand-receptor	Neurotransmitter
Glu_GRIK5	ClusterCA2-4_neurons	ClusterCA_neurons	0.00388225	GLS,SLC17A6,SLC17A7,SLC17A8	GRIK5		ligand-receptor	Neurotransmitter
Glu_GRIK5	ClusterCA_neurons	ClusterCA_neurons	0.00328488	GLS,SLC17A6,SLC17A7,SLC17A8	GRIK5		ligand-receptor	Neurotransmitter
Glu_GRIK5	ClusterImmature	ClusterCA_neurons	0.00458544	GLS,SLC17A6,SLC17A7,SLC17A8	GRIK5		ligand-receptor	Neurotransmitter
Glu_GRIK5	ClusterNeuroblast	ClusterCA_neurons	0.00175174	GLS,SLC17A6,SLC17A7,SLC17A8	GRIK5		ligand-receptor	Neurotransmitter
Glu_GRIK5	ClustermGC	ClusterCA_neurons	0.00365423	GLS,SLC17A6,SLC17A7,SLC17A8	GRIK5		ligand-receptor	Neurotransmitter
Glu_GRIK5	ClusterCA2-4_neurons	ClusterEpendymal	0.000630844	GLS,SLC17A6,SLC17A7,SLC17A8	GRIK5		ligand-receptor	Neurotransmitter
Glu_GRIK5	ClusterCA_neurons	ClusterEpendymal	0.000533773	GLS,SLC17A6,SLC17A7,SLC17A8	GRIK5		ligand-receptor	Neurotransmitter
Glu_GRIK5	ClusterImmature	ClusterEpendymal	0.000745107	GLS,SLC17A6,SLC17A7,SLC17A8	GRIK5		ligand-receptor	Neurotransmitter
Glu_GRIK5	ClusterNeuroblast	ClusterEpendymal	0.000284647	GLS,SLC17A6,SLC17A7,SLC17A8	GRIK5		ligand-receptor	Neurotransmitter
Glu_GRIK5	ClustermGC	ClusterEpendymal	0.000593791	GLS,SLC17A6,SLC17A7,SLC17A8	GRIK5		ligand-receptor	Neurotransmitter
Glu_GRIK5	ClusterCA2-4_neurons	ClusterGABA_neurons	0.00187025	GLS,SLC17A6,SLC17A7,SLC17A8	GRIK5		ligand-receptor	Neurotransmitter
Glu_GRIK5	ClusterCA_neurons	ClusterGABA_neurons	0.00158246	GLS,SLC17A6,SLC17A7,SLC17A8	GRIK5		ligand-receptor	Neurotransmitter
Glu_GRIK5	ClusterImmature	ClusterGABA_neurons	0.002209	GLS,SLC17A6,SLC17A7,SLC17A8	GRIK5		ligand-receptor	Neurotransmitter
Glu_GRIK5	ClusterNeuroblast	ClusterGABA_neurons	0.000843886	GLS,SLC17A6,SLC17A7,SLC17A8	GRIK5		ligand-receptor	Neurotransmitter
Glu_GRIK5	ClustermGC	ClusterGABA_neurons	0.0017604	GLS,SLC17A6,SLC17A7,SLC17A8	GRIK5		ligand-receptor	Neurotransmitter
Glu_GRIK5	ClusterCA2-4_neurons	ClusterImmature	0.00553865	GLS,SLC17A6,SLC17A7,SLC17A8	GRIK5		ligand-receptor	Neurotransmitter
Glu_GRIK5	ClusterCA_neurons	ClusterImmature	0.00468639	GLS,SLC17A6,SLC17A7,SLC17A8	GRIK5		ligand-receptor	Neurotransmitter
Glu_GRIK5	ClusterImmature	ClusterImmature	0.00654185	GLS,SLC17A6,SLC17A7,SLC17A8	GRIK5		ligand-receptor	Neurotransmitter
Glu_GRIK5	ClusterNeuroblast	ClusterImmature	0.00249913	GLS,SLC17A6,SLC17A7,SLC17A8	GRIK5		ligand-receptor	Neurotransmitter
Glu_GRIK5	ClustermGC	ClusterImmature	0.00521333	GLS,SLC17A6,SLC17A7,SLC17A8	GRIK5		ligand-receptor	Neurotransmitter
Glu_GRIK5	ClusterCA2-4_neurons	ClustermGC	0.00608772	GLS,SLC17A6,SLC17A7,SLC17A8	GRIK5		ligand-receptor	Neurotransmitter
Glu_GRIK5	ClusterCA_neurons	ClustermGC	0.00515098	GLS,SLC17A6,SLC17A7,SLC17A8	GRIK5		ligand-receptor	Neurotransmitter
Glu_GRIK5	ClusterImmature	ClustermGC	0.00719038	GLS,SLC17A6,SLC17A7,SLC17A8	GRIK5		ligand-receptor	Neurotransmitter
Glu_GRIK5	ClusterNeuroblast	ClustermGC	0.00274688	GLS,SLC17A6,SLC17A7,SLC17A8	GRIK5		ligand-receptor	Neurotransmitter
Glu_GRIK5	ClustermGC	ClustermGC	0.00573016	GLS,SLC17A6,SLC17A7,SLC17A8	GRIK5		ligand-receptor	Neurotransmitter
Glu_GRIN1	ClusterCA2-4_neurons	ClusterCA2.4_neurons	0.00604378	GLS,SLC17A6,SLC17A7,SLC17A8	GRIN1	Prkcg,Prkca,Grin2c,Dlg4,Grin2b	ligand-receptor	Neurotransmitter
Glu_GRIN1	ClusterCA_neurons	ClusterCA2.4_neurons	0.0051138	GLS,SLC17A6,SLC17A7,SLC17A8	GRIN1	Prkcg,Prkca,Grin2c,Dlg4,Grin2b	ligand-receptor	Neurotransmitter
Glu_GRIN1	ClusterImmature	ClusterCA2.4_neurons	0.00713848	GLS,SLC17A6,SLC17A7,SLC17A8	GRIN1	Prkcg,Prkca,Grin2c,Dlg4,Grin2b	ligand-receptor	Neurotransmitter
Glu_GRIN1	ClusterNeuroblast	ClusterCA2.4_neurons	0.00272706	GLS,SLC17A6,SLC17A7,SLC17A8	GRIN1	Prkcg,Prkca,Grin2c,Dlg4,Grin2b	ligand-receptor	Neurotransmitter
Glu_GRIN1	ClustermGC	ClusterCA2.4_neurons	0.0056888	GLS,SLC17A6,SLC17A7,SLC17A8	GRIN1	Prkcg,Prkca,Grin2c,Dlg4,Grin2b	ligand-receptor	Neurotransmitter
Glu_GRIN1	ClusterCA2-4_neurons	ClusterCA_neurons	0.00913037	GLS,SLC17A6,SLC17A7,SLC17A8	GRIN1	Prkcg,Prkca,Grin2c,Dlg4,Grin2b	ligand-receptor	Neurotransmitter
Glu_GRIN1	ClusterCA_neurons	ClusterCA_neurons	0.00772544	GLS,SLC17A6,SLC17A7,SLC17A8	GRIN1	Prkcg,Prkca,Grin2c,Dlg4,Grin2b	ligand-receptor	Neurotransmitter
Glu_GRIN1	ClusterImmature	ClusterCA_neurons	0.0107841	GLS,SLC17A6,SLC17A7,SLC17A8	GRIN1	Prkcg,Prkca,Grin2c,Dlg4,Grin2b	ligand-receptor	Neurotransmitter
Glu_GRIN1	ClusterNeuroblast	ClusterCA_neurons	0.00411977	GLS,SLC17A6,SLC17A7,SLC17A8	GRIN1	Prkcg,Prkca,Grin2c,Dlg4,Grin2b	ligand-receptor	Neurotransmitter
Glu_GRIN1	ClustermGC	ClusterCA_neurons	0.0085941	GLS,SLC17A6,SLC17A7,SLC17A8	GRIN1	Prkcg,Prkca,Grin2c,Dlg4,Grin2b	ligand-receptor	Neurotransmitter
Glu_GRIN1	ClusterCA2-4_neurons	ClusterGABA_neurons	0.00806141	GLS,SLC17A6,SLC17A7,SLC17A8	GRIN1	Prkcg,Prkca,Grin2c,Dlg4,Grin2b	ligand-receptor	Neurotransmitter
Glu_GRIN1	ClusterCA_neurons	ClusterGABA_neurons	0.00682097	GLS,SLC17A6,SLC17A7,SLC17A8	GRIN1	Prkcg,Prkca,Grin2c,Dlg4,Grin2b	ligand-receptor	Neurotransmitter
Glu_GRIN1	ClusterImmature	ClusterGABA_neurons	0.00952155	GLS,SLC17A6,SLC17A7,SLC17A8	GRIN1	Prkcg,Prkca,Grin2c,Dlg4,Grin2b	ligand-receptor	Neurotransmitter
Glu_GRIN1	ClusterNeuroblast	ClusterGABA_neurons	0.00363744	GLS,SLC17A6,SLC17A7,SLC17A8	GRIN1	Prkcg,Prkca,Grin2c,Dlg4,Grin2b	ligand-receptor	Neurotransmitter
Glu_GRIN1	ClustermGC	ClusterGABA_neurons	0.00758792	GLS,SLC17A6,SLC17A7,SLC17A8	GRIN1	Prkcg,Prkca,Grin2c,Dlg4,Grin2b	ligand-receptor	Neurotransmitter
Glu_GRIN1	ClusterCA2-4_neurons	ClusterImmature	0.00686836	GLS,SLC17A6,SLC17A7,SLC17A8	GRIN1	Prkcg,Prkca,Grin2c,Dlg4,Grin2b	ligand-receptor	Neurotransmitter
Glu_GRIN1	ClusterCA_neurons	ClusterImmature	0.0058115	GLS,SLC17A6,SLC17A7,SLC17A8	GRIN1	Prkcg,Prkca,Grin2c,Dlg4,Grin2b	ligand-receptor	Neurotransmitter
Glu_GRIN1	ClusterImmature	ClusterImmature	0.00811241	GLS,SLC17A6,SLC17A7,SLC17A8	GRIN1	Prkcg,Prkca,Grin2c,Dlg4,Grin2b	ligand-receptor	Neurotransmitter
Glu_GRIN1	ClusterNeuroblast	ClusterImmature	0.00309912	GLS,SLC17A6,SLC17A7,SLC17A8	GRIN1	Prkcg,Prkca,Grin2c,Dlg4,Grin2b	ligand-receptor	Neurotransmitter
Glu_GRIN1	ClustermGC	ClusterImmature	0.00646495	GLS,SLC17A6,SLC17A7,SLC17A8	GRIN1	Prkcg,Prkca,Grin2c,Dlg4,Grin2b	ligand-receptor	Neurotransmitter
Glu_GRIN1	ClusterCA2-4_neurons	ClustermGC	0.00594918	GLS,SLC17A6,SLC17A7,SLC17A8	GRIN1	Prkcg,Prkca,Grin2c,Dlg4,Grin2b	ligand-receptor	Neurotransmitter
Glu_GRIN1	ClusterCA_neurons	ClustermGC	0.00503375	GLS,SLC17A6,SLC17A7,SLC17A8	GRIN1	Prkcg,Prkca,Grin2c,Dlg4,Grin2b	ligand-receptor	Neurotransmitter
Glu_GRIN1	ClusterImmature	ClustermGC	0.00702674	GLS,SLC17A6,SLC17A7,SLC17A8	GRIN1	Prkcg,Prkca,Grin2c,Dlg4,Grin2b	ligand-receptor	Neurotransmitter
Glu_GRIN1	ClusterNeuroblast	ClustermGC	0.00268437	GLS,SLC17A6,SLC17A7,SLC17A8	GRIN1	Prkcg,Prkca,Grin2c,Dlg4,Grin2b	ligand-receptor	Neurotransmitter
Glu_GRIN1	ClustermGC	ClustermGC	0.00559975	GLS,SLC17A6,SLC17A7,SLC17A8	GRIN1	Prkcg,Prkca,Grin2c,Dlg4,Grin2b	ligand-receptor	Neurotransmitter
Glu_GRIN2A	ClusterCA2-4_neurons	ClusterCA2.4_neurons	0.0293839	GLS,SLC17A6,SLC17A7,SLC17A8	GRIN2A	Fyn,Src,Dlg4,Prkaca,Cdk5	ligand-receptor	Neurotransmitter
Glu_GRIN2A	ClusterCA_neurons	ClusterCA2.4_neurons	0.0248625	GLS,SLC17A6,SLC17A7,SLC17A8	GRIN2A	Fyn,Src,Dlg4,Prkaca,Cdk5	ligand-receptor	Neurotransmitter
Glu_GRIN2A	ClusterImmature	ClusterCA2.4_neurons	0.0347062	GLS,SLC17A6,SLC17A7,SLC17A8	GRIN2A	Fyn,Src,Dlg4,Prkaca,Cdk5	ligand-receptor	Neurotransmitter
Glu_GRIN2A	ClusterNeuroblast	ClusterCA2.4_neurons	0.0132585	GLS,SLC17A6,SLC17A7,SLC17A8	GRIN2A	Fyn,Src,Dlg4,Prkaca,Cdk5	ligand-receptor	Neurotransmitter
Glu_GRIN2A	ClustermGC	ClusterCA2.4_neurons	0.0276581	GLS,SLC17A6,SLC17A7,SLC17A8	GRIN2A	Fyn,Src,Dlg4,Prkaca,Cdk5	ligand-receptor	Neurotransmitter
Glu_GRIN2A	ClusterCA2-4_neurons	ClusterCA_neurons	0.0322963	GLS,SLC17A6,SLC17A7,SLC17A8	GRIN2A	Fyn,Src,Dlg4,Prkaca,Cdk5	ligand-receptor	Neurotransmitter
Glu_GRIN2A	ClusterCA_neurons	ClusterCA_neurons	0.0273267	GLS,SLC17A6,SLC17A7,SLC17A8	GRIN2A	Fyn,Src,Dlg4,Prkaca,Cdk5	ligand-receptor	Neurotransmitter
Glu_GRIN2A	ClusterImmature	ClusterCA_neurons	0.0381461	GLS,SLC17A6,SLC17A7,SLC17A8	GRIN2A	Fyn,Src,Dlg4,Prkaca,Cdk5	ligand-receptor	Neurotransmitter
Glu_GRIN2A	ClusterNeuroblast	ClusterCA_neurons	0.0145726	GLS,SLC17A6,SLC17A7,SLC17A8	GRIN2A	Fyn,Src,Dlg4,Prkaca,Cdk5	ligand-receptor	Neurotransmitter
Glu_GRIN2A	ClustermGC	ClusterCA_neurons	0.0303994	GLS,SLC17A6,SLC17A7,SLC17A8	GRIN2A	Fyn,Src,Dlg4,Prkaca,Cdk5	ligand-receptor	Neurotransmitter
Glu_GRIN2A	ClusterCA2-4_neurons	ClusterEpendymal	0.011708	GLS,SLC17A6,SLC17A7,SLC17A8	GRIN2A	Fyn,Src,Dlg4,Prkaca,Cdk5	ligand-receptor	Neurotransmitter
Glu_GRIN2A	ClusterCA_neurons	ClusterEpendymal	0.00990646	GLS,SLC17A6,SLC17A7,SLC17A8	GRIN2A	Fyn,Src,Dlg4,Prkaca,Cdk5	ligand-receptor	Neurotransmitter
Glu_GRIN2A	ClusterImmature	ClusterEpendymal	0.0138287	GLS,SLC17A6,SLC17A7,SLC17A8	GRIN2A	Fyn,Src,Dlg4,Prkaca,Cdk5	ligand-receptor	Neurotransmitter
Glu_GRIN2A	ClusterNeuroblast	ClusterEpendymal	0.00528285	GLS,SLC17A6,SLC17A7,SLC17A8	GRIN2A	Fyn,Src,Dlg4,Prkaca,Cdk5	ligand-receptor	Neurotransmitter
Glu_GRIN2A	ClustermGC	ClusterEpendymal	0.0110203	GLS,SLC17A6,SLC17A7,SLC17A8	GRIN2A	Fyn,Src,Dlg4,Prkaca,Cdk5	ligand-receptor	Neurotransmitter
Glu_GRIN2A	ClusterCA2-4_neurons	ClusterGABA_neurons	0.0307231	GLS,SLC17A6,SLC17A7,SLC17A8	GRIN2A	Fyn,Src,Dlg4,Prkaca,Cdk5	ligand-receptor	Neurotransmitter
Glu_GRIN2A	ClusterCA_neurons	ClusterGABA_neurons	0.0259956	GLS,SLC17A6,SLC17A7,SLC17A8	GRIN2A	Fyn,Src,Dlg4,Prkaca,Cdk5	ligand-receptor	Neurotransmitter
Glu_GRIN2A	ClusterImmature	ClusterGABA_neurons	0.0362879	GLS,SLC17A6,SLC17A7,SLC17A8	GRIN2A	Fyn,Src,Dlg4,Prkaca,Cdk5	ligand-receptor	Neurotransmitter
Glu_GRIN2A	ClusterNeuroblast	ClusterGABA_neurons	0.0138628	GLS,SLC17A6,SLC17A7,SLC17A8	GRIN2A	Fyn,Src,Dlg4,Prkaca,Cdk5	ligand-receptor	Neurotransmitter
Glu_GRIN2A	ClustermGC	ClusterGABA_neurons	0.0289185	GLS,SLC17A6,SLC17A7,SLC17A8	GRIN2A	Fyn,Src,Dlg4,Prkaca,Cdk5	ligand-receptor	Neurotransmitter
Glu_GRIN2A	ClusterCA2-4_neurons	ClusterImmature	0.0347781	GLS,SLC17A6,SLC17A7,SLC17A8	GRIN2A	Fyn,Src,Dlg4,Prkaca,Cdk5	ligand-receptor	Neurotransmitter
Glu_GRIN2A	ClusterCA_neurons	ClusterImmature	0.0294266	GLS,SLC17A6,SLC17A7,SLC17A8	GRIN2A	Fyn,Src,Dlg4,Prkaca,Cdk5	ligand-receptor	Neurotransmitter
Glu_GRIN2A	ClusterImmature	ClusterImmature	0.0410774	GLS,SLC17A6,SLC17A7,SLC17A8	GRIN2A	Fyn,Src,Dlg4,Prkaca,Cdk5	ligand-receptor	Neurotransmitter
Glu_GRIN2A	ClusterNeuroblast	ClusterImmature	0.0156924	GLS,SLC17A6,SLC17A7,SLC17A8	GRIN2A	Fyn,Src,Dlg4,Prkaca,Cdk5	ligand-receptor	Neurotransmitter
Glu_GRIN2A	ClustermGC	ClusterImmature	0.0327354	GLS,SLC17A6,SLC17A7,SLC17A8	GRIN2A	Fyn,Src,Dlg4,Prkaca,Cdk5	ligand-receptor	Neurotransmitter
Glu_GRIN2A	ClusterCA2-4_neurons	ClusterNeuroblast	0.00362736	GLS,SLC17A6,SLC17A7,SLC17A8	GRIN2A	Fyn,Src,Dlg4,Prkaca,Cdk5	ligand-receptor	Neurotransmitter
Glu_GRIN2A	ClusterCA_neurons	ClusterNeuroblast	0.0030692	GLS,SLC17A6,SLC17A7,SLC17A8	GRIN2A	Fyn,Src,Dlg4,Prkaca,Cdk5	ligand-receptor	Neurotransmitter
Glu_GRIN2A	ClusterImmature	ClusterNeuroblast	0.00428438	GLS,SLC17A6,SLC17A7,SLC17A8	GRIN2A	Fyn,Src,Dlg4,Prkaca,Cdk5	ligand-receptor	Neurotransmitter
Glu_GRIN2A	ClustermGC	ClusterNeuroblast	0.00341431	GLS,SLC17A6,SLC17A7,SLC17A8	GRIN2A	Fyn,Src,Dlg4,Prkaca,Cdk5	ligand-receptor	Neurotransmitter
Glu_GRIN2A	ClusterCA2-4_neurons	ClustermGC	0.0357755	GLS,SLC17A6,SLC17A7,SLC17A8	GRIN2A	Fyn,Src,Dlg4,Prkaca,Cdk5	ligand-receptor	Neurotransmitter
Glu_GRIN2A	ClusterCA_neurons	ClustermGC	0.0302706	GLS,SLC17A6,SLC17A7,SLC17A8	GRIN2A	Fyn,Src,Dlg4,Prkaca,Cdk5	ligand-receptor	Neurotransmitter
Glu_GRIN2A	ClusterImmature	ClustermGC	0.0422554	GLS,SLC17A6,SLC17A7,SLC17A8	GRIN2A	Fyn,Src,Dlg4,Prkaca,Cdk5	ligand-receptor	Neurotransmitter
Glu_GRIN2A	ClusterNeuroblast	ClustermGC	0.0161425	GLS,SLC17A6,SLC17A7,SLC17A8	GRIN2A	Fyn,Src,Dlg4,Prkaca,Cdk5	ligand-receptor	Neurotransmitter
Glu_GRIN2A	ClustermGC	ClustermGC	0.0336742	GLS,SLC17A6,SLC17A7,SLC17A8	GRIN2A	Fyn,Src,Dlg4,Prkaca,Cdk5	ligand-receptor	Neurotransmitter
Glu_GRIN2B	ClusterCA2-4_neurons	ClusterCA2.4_neurons	0.0320298	GLS,SLC17A6,SLC17A7,SLC17A8	GRIN2B	Camk2a,Prkca,Fyn,Prkcg,Prkcb,Src,Ptprg,Dlg4,Camk2b,Dapk1	ligand-receptor	Neurotransmitter
Glu_GRIN2B	ClusterCA_neurons	ClusterCA2.4_neurons	0.0271012	GLS,SLC17A6,SLC17A7,SLC17A8	GRIN2B	Camk2a,Prkca,Fyn,Prkcg,Prkcb,Src,Ptprg,Dlg4,Camk2b,Dapk1	ligand-receptor	Neurotransmitter
Glu_GRIN2B	ClusterImmature	ClusterCA2.4_neurons	0.0378312	GLS,SLC17A6,SLC17A7,SLC17A8	GRIN2B	Camk2a,Prkca,Fyn,Prkcg,Prkcb,Src,Ptprg,Dlg4,Camk2b,Dapk1	ligand-receptor	Neurotransmitter
Glu_GRIN2B	ClusterNeuroblast	ClusterCA2.4_neurons	0.0144524	GLS,SLC17A6,SLC17A7,SLC17A8	GRIN2B	Camk2a,Prkca,Fyn,Prkcg,Prkcb,Src,Ptprg,Dlg4,Camk2b,Dapk1	ligand-receptor	Neurotransmitter
Glu_GRIN2B	ClustermGC	ClusterCA2.4_neurons	0.0301485	GLS,SLC17A6,SLC17A7,SLC17A8	GRIN2B	Camk2a,Prkca,Fyn,Prkcg,Prkcb,Src,Ptprg,Dlg4,Camk2b,Dapk1	ligand-receptor	Neurotransmitter
Glu_GRIN2B	ClusterCA2-4_neurons	ClusterCA_neurons	0.0324327	GLS,SLC17A6,SLC17A7,SLC17A8	GRIN2B	Camk2a,Prkca,Fyn,Prkcg,Prkcb,Src,Ptprg,Dlg4,Camk2b,Dapk1	ligand-receptor	Neurotransmitter
Glu_GRIN2B	ClusterCA_neurons	ClusterCA_neurons	0.0274421	GLS,SLC17A6,SLC17A7,SLC17A8	GRIN2B	Camk2a,Prkca,Fyn,Prkcg,Prkcb,Src,Ptprg,Dlg4,Camk2b,Dapk1	ligand-receptor	Neurotransmitter
Glu_GRIN2B	ClusterImmature	ClusterCA_neurons	0.0383072	GLS,SLC17A6,SLC17A7,SLC17A8	GRIN2B	Camk2a,Prkca,Fyn,Prkcg,Prkcb,Src,Ptprg,Dlg4,Camk2b,Dapk1	ligand-receptor	Neurotransmitter
Glu_GRIN2B	ClusterNeuroblast	ClusterCA_neurons	0.0146342	GLS,SLC17A6,SLC17A7,SLC17A8	GRIN2B	Camk2a,Prkca,Fyn,Prkcg,Prkcb,Src,Ptprg,Dlg4,Camk2b,Dapk1	ligand-receptor	Neurotransmitter
Glu_GRIN2B	ClustermGC	ClusterCA_neurons	0.0305278	GLS,SLC17A6,SLC17A7,SLC17A8	GRIN2B	Camk2a,Prkca,Fyn,Prkcg,Prkcb,Src,Ptprg,Dlg4,Camk2b,Dapk1	ligand-receptor	Neurotransmitter
Glu_GRIN2B	ClusterCA2-4_neurons	ClusterEpendymal	0.00127068	GLS,SLC17A6,SLC17A7,SLC17A8	GRIN2B	Camk2a,Prkca,Fyn,Prkcg,Prkcb,Src,Ptprg,Dlg4,Camk2b,Dapk1	ligand-receptor	Neurotransmitter
Glu_GRIN2B	ClusterCA_neurons	ClusterEpendymal	0.00107516	GLS,SLC17A6,SLC17A7,SLC17A8	GRIN2B	Camk2a,Prkca,Fyn,Prkcg,Prkcb,Src,Ptprg,Dlg4,Camk2b,Dapk1	ligand-receptor	Neurotransmitter
Glu_GRIN2B	ClusterImmature	ClusterEpendymal	0.00150084	GLS,SLC17A6,SLC17A7,SLC17A8	GRIN2B	Camk2a,Prkca,Fyn,Prkcg,Prkcb,Src,Ptprg,Dlg4,Camk2b,Dapk1	ligand-receptor	Neurotransmitter
Glu_GRIN2B	ClusterNeuroblast	ClusterEpendymal	0.000573353	GLS,SLC17A6,SLC17A7,SLC17A8	GRIN2B	Camk2a,Prkca,Fyn,Prkcg,Prkcb,Src,Ptprg,Dlg4,Camk2b,Dapk1	ligand-receptor	Neurotransmitter
Glu_GRIN2B	ClustermGC	ClusterEpendymal	0.00119605	GLS,SLC17A6,SLC17A7,SLC17A8	GRIN2B	Camk2a,Prkca,Fyn,Prkcg,Prkcb,Src,Ptprg,Dlg4,Camk2b,Dapk1	ligand-receptor	Neurotransmitter
Glu_GRIN2B	ClusterCA2-4_neurons	ClusterGABA_neurons	0.0299141	GLS,SLC17A6,SLC17A7,SLC17A8	GRIN2B	Camk2a,Prkca,Fyn,Prkcg,Prkcb,Src,Ptprg,Dlg4,Camk2b,Dapk1	ligand-receptor	Neurotransmitter
Glu_GRIN2B	ClusterCA_neurons	ClusterGABA_neurons	0.0253111	GLS,SLC17A6,SLC17A7,SLC17A8	GRIN2B	Camk2a,Prkca,Fyn,Prkcg,Prkcb,Src,Ptprg,Dlg4,Camk2b,Dapk1	ligand-receptor	Neurotransmitter
Glu_GRIN2B	ClusterImmature	ClusterGABA_neurons	0.0353323	GLS,SLC17A6,SLC17A7,SLC17A8	GRIN2B	Camk2a,Prkca,Fyn,Prkcg,Prkcb,Src,Ptprg,Dlg4,Camk2b,Dapk1	ligand-receptor	Neurotransmitter
Glu_GRIN2B	ClusterNeuroblast	ClusterGABA_neurons	0.0134977	GLS,SLC17A6,SLC17A7,SLC17A8	GRIN2B	Camk2a,Prkca,Fyn,Prkcg,Prkcb,Src,Ptprg,Dlg4,Camk2b,Dapk1	ligand-receptor	Neurotransmitter
Glu_GRIN2B	ClustermGC	ClusterGABA_neurons	0.0281571	GLS,SLC17A6,SLC17A7,SLC17A8	GRIN2B	Camk2a,Prkca,Fyn,Prkcg,Prkcb,Src,Ptprg,Dlg4,Camk2b,Dapk1	ligand-receptor	Neurotransmitter
Glu_GRIN2B	ClusterCA2-4_neurons	ClusterImmature	0.0332284	GLS,SLC17A6,SLC17A7,SLC17A8	GRIN2B	Camk2a,Prkca,Fyn,Prkcg,Prkcb,Src,Ptprg,Dlg4,Camk2b,Dapk1	ligand-receptor	Neurotransmitter
Glu_GRIN2B	ClusterCA_neurons	ClusterImmature	0.0281154	GLS,SLC17A6,SLC17A7,SLC17A8	GRIN2B	Camk2a,Prkca,Fyn,Prkcg,Prkcb,Src,Ptprg,Dlg4,Camk2b,Dapk1	ligand-receptor	Neurotransmitter
Glu_GRIN2B	ClusterImmature	ClusterImmature	0.039247	GLS,SLC17A6,SLC17A7,SLC17A8	GRIN2B	Camk2a,Prkca,Fyn,Prkcg,Prkcb,Src,Ptprg,Dlg4,Camk2b,Dapk1	ligand-receptor	Neurotransmitter
Glu_GRIN2B	ClusterNeuroblast	ClusterImmature	0.0149932	GLS,SLC17A6,SLC17A7,SLC17A8	GRIN2B	Camk2a,Prkca,Fyn,Prkcg,Prkcb,Src,Ptprg,Dlg4,Camk2b,Dapk1	ligand-receptor	Neurotransmitter
Glu_GRIN2B	ClustermGC	ClusterImmature	0.0312767	GLS,SLC17A6,SLC17A7,SLC17A8	GRIN2B	Camk2a,Prkca,Fyn,Prkcg,Prkcb,Src,Ptprg,Dlg4,Camk2b,Dapk1	ligand-receptor	Neurotransmitter
Glu_GRIN2B	ClusterCA2-4_neurons	ClusterNeuroblast	0.00299715	GLS,SLC17A6,SLC17A7,SLC17A8	GRIN2B	Camk2a,Prkca,Fyn,Prkcg,Prkcb,Src,Ptprg,Dlg4,Camk2b,Dapk1	ligand-receptor	Neurotransmitter
Glu_GRIN2B	ClusterCA_neurons	ClusterNeuroblast	0.00253597	GLS,SLC17A6,SLC17A7,SLC17A8	GRIN2B	Camk2a,Prkca,Fyn,Prkcg,Prkcb,Src,Ptprg,Dlg4,Camk2b,Dapk1	ligand-receptor	Neurotransmitter
Glu_GRIN2B	ClusterImmature	ClusterNeuroblast	0.00354002	GLS,SLC17A6,SLC17A7,SLC17A8	GRIN2B	Camk2a,Prkca,Fyn,Prkcg,Prkcb,Src,Ptprg,Dlg4,Camk2b,Dapk1	ligand-receptor	Neurotransmitter
Glu_GRIN2B	ClusterNeuroblast	ClusterNeuroblast	0.00135236	GLS,SLC17A6,SLC17A7,SLC17A8	GRIN2B	Camk2a,Prkca,Fyn,Prkcg,Prkcb,Src,Ptprg,Dlg4,Camk2b,Dapk1	ligand-receptor	Neurotransmitter
Glu_GRIN2B	ClustermGC	ClusterNeuroblast	0.00282111	GLS,SLC17A6,SLC17A7,SLC17A8	GRIN2B	Camk2a,Prkca,Fyn,Prkcg,Prkcb,Src,Ptprg,Dlg4,Camk2b,Dapk1	ligand-receptor	Neurotransmitter
Glu_GRIN2B	ClusterCA2-4_neurons	ClusterOPCs	0.0104629	GLS,SLC17A6,SLC17A7,SLC17A8	GRIN2B	Camk2a,Prkca,Fyn,Prkcg,Prkcb,Src,Ptprg,Dlg4,Camk2b,Dapk1	ligand-receptor	Neurotransmitter
Glu_GRIN2B	ClusterCA_neurons	ClusterOPCs	0.00885296	GLS,SLC17A6,SLC17A7,SLC17A8	GRIN2B	Camk2a,Prkca,Fyn,Prkcg,Prkcb,Src,Ptprg,Dlg4,Camk2b,Dapk1	ligand-receptor	Neurotransmitter
Glu_GRIN2B	ClusterImmature	ClusterOPCs	0.0123581	GLS,SLC17A6,SLC17A7,SLC17A8	GRIN2B	Camk2a,Prkca,Fyn,Prkcg,Prkcb,Src,Ptprg,Dlg4,Camk2b,Dapk1	ligand-receptor	Neurotransmitter
Glu_GRIN2B	ClusterNeuroblast	ClusterOPCs	0.00472105	GLS,SLC17A6,SLC17A7,SLC17A8	GRIN2B	Camk2a,Prkca,Fyn,Prkcg,Prkcb,Src,Ptprg,Dlg4,Camk2b,Dapk1	ligand-receptor	Neurotransmitter
Glu_GRIN2B	ClustermGC	ClusterOPCs	0.0098484	GLS,SLC17A6,SLC17A7,SLC17A8	GRIN2B	Camk2a,Prkca,Fyn,Prkcg,Prkcb,Src,Ptprg,Dlg4,Camk2b,Dapk1	ligand-receptor	Neurotransmitter
Glu_GRIN2B	ClusterCA2-4_neurons	ClustermGC	0.0331515	GLS,SLC17A6,SLC17A7,SLC17A8	GRIN2B	Camk2a,Prkca,Fyn,Prkcg,Prkcb,Src,Ptprg,Dlg4,Camk2b,Dapk1	ligand-receptor	Neurotransmitter
Glu_GRIN2B	ClusterCA_neurons	ClustermGC	0.0280504	GLS,SLC17A6,SLC17A7,SLC17A8	GRIN2B	Camk2a,Prkca,Fyn,Prkcg,Prkcb,Src,Ptprg,Dlg4,Camk2b,Dapk1	ligand-receptor	Neurotransmitter
Glu_GRIN2B	ClusterImmature	ClustermGC	0.0391562	GLS,SLC17A6,SLC17A7,SLC17A8	GRIN2B	Camk2a,Prkca,Fyn,Prkcg,Prkcb,Src,Ptprg,Dlg4,Camk2b,Dapk1	ligand-receptor	Neurotransmitter
Glu_GRIN2B	ClusterNeuroblast	ClustermGC	0.0149585	GLS,SLC17A6,SLC17A7,SLC17A8	GRIN2B	Camk2a,Prkca,Fyn,Prkcg,Prkcb,Src,Ptprg,Dlg4,Camk2b,Dapk1	ligand-receptor	Neurotransmitter
Glu_GRIN2B	ClustermGC	ClustermGC	0.0312044	GLS,SLC17A6,SLC17A7,SLC17A8	GRIN2B	Camk2a,Prkca,Fyn,Prkcg,Prkcb,Src,Ptprg,Dlg4,Camk2b,Dapk1	ligand-receptor	Neurotransmitter
Glu_GRIN2D	ClusterCA2-4_neurons	ClusterGABA_neurons	0.00126841	GLS,SLC17A6,SLC17A7,SLC17A8	GRIN2D		ligand-receptor	Neurotransmitter
Glu_GRIN2D	ClusterCA_neurons	ClusterGABA_neurons	0.00107323	GLS,SLC17A6,SLC17A7,SLC17A8	GRIN2D		ligand-receptor	Neurotransmitter
Glu_GRIN2D	ClusterImmature	ClusterGABA_neurons	0.00149815	GLS,SLC17A6,SLC17A7,SLC17A8	GRIN2D		ligand-receptor	Neurotransmitter
Glu_GRIN2D	ClusterNeuroblast	ClusterGABA_neurons	0.000572326	GLS,SLC17A6,SLC17A7,SLC17A8	GRIN2D		ligand-receptor	Neurotransmitter
Glu_GRIN2D	ClustermGC	ClusterGABA_neurons	0.00119391	GLS,SLC17A6,SLC17A7,SLC17A8	GRIN2D		ligand-receptor	Neurotransmitter
Glu_GRIN3A	ClusterCA2-4_neurons	ClusterGABA_neurons	0.00618053	GLS,SLC17A6,SLC17A7,SLC17A8	GRIN3A		ligand-receptor	Neurotransmitter
Glu_GRIN3A	ClusterCA_neurons	ClusterGABA_neurons	0.00522951	GLS,SLC17A6,SLC17A7,SLC17A8	GRIN3A		ligand-receptor	Neurotransmitter
Glu_GRIN3A	ClusterImmature	ClusterGABA_neurons	0.00729999	GLS,SLC17A6,SLC17A7,SLC17A8	GRIN3A		ligand-receptor	Neurotransmitter
Glu_GRIN3A	ClusterNeuroblast	ClusterGABA_neurons	0.00278876	GLS,SLC17A6,SLC17A7,SLC17A8	GRIN3A		ligand-receptor	Neurotransmitter
Glu_GRIN3A	ClustermGC	ClusterGABA_neurons	0.00581752	GLS,SLC17A6,SLC17A7,SLC17A8	GRIN3A		ligand-receptor	Neurotransmitter
Glu_GRIN3A	ClusterCA2-4_neurons	ClusterImmature	0.00190087	GLS,SLC17A6,SLC17A7,SLC17A8	GRIN3A		ligand-receptor	Neurotransmitter
Glu_GRIN3A	ClusterCA_neurons	ClusterImmature	0.00160838	GLS,SLC17A6,SLC17A7,SLC17A8	GRIN3A		ligand-receptor	Neurotransmitter
Glu_GRIN3A	ClusterImmature	ClusterImmature	0.00224517	GLS,SLC17A6,SLC17A7,SLC17A8	GRIN3A		ligand-receptor	Neurotransmitter
Glu_GRIN3A	ClusterNeuroblast	ClusterImmature	0.000857704	GLS,SLC17A6,SLC17A7,SLC17A8	GRIN3A		ligand-receptor	Neurotransmitter
Glu_GRIN3A	ClustermGC	ClusterImmature	0.00178922	GLS,SLC17A6,SLC17A7,SLC17A8	GRIN3A		ligand-receptor	Neurotransmitter
Glu_GRIN3A	ClusterCA2-4_neurons	ClustermGC	0.00183193	GLS,SLC17A6,SLC17A7,SLC17A8	GRIN3A		ligand-receptor	Neurotransmitter
Glu_GRIN3A	ClusterCA_neurons	ClustermGC	0.00155004	GLS,SLC17A6,SLC17A7,SLC17A8	GRIN3A		ligand-receptor	Neurotransmitter
Glu_GRIN3A	ClusterImmature	ClustermGC	0.00216374	GLS,SLC17A6,SLC17A7,SLC17A8	GRIN3A		ligand-receptor	Neurotransmitter
Glu_GRIN3A	ClusterNeuroblast	ClustermGC	0.000826597	GLS,SLC17A6,SLC17A7,SLC17A8	GRIN3A		ligand-receptor	Neurotransmitter
Glu_GRIN3A	ClustermGC	ClustermGC	0.00172433	GLS,SLC17A6,SLC17A7,SLC17A8	GRIN3A		ligand-receptor	Neurotransmitter
Glu_GRM1	ClusterCA2-4_neurons	ClusterCA2.4_neurons	0.023563	GLS,SLC17A6,SLC17A7,SLC17A8	GRM1	Prkca	ligand-receptor	Neurotransmitter
Glu_GRM1	ClusterCA_neurons	ClusterCA2.4_neurons	0.0199372	GLS,SLC17A6,SLC17A7,SLC17A8	GRM1	Prkca	ligand-receptor	Neurotransmitter
Glu_GRM1	ClusterImmature	ClusterCA2.4_neurons	0.0278309	GLS,SLC17A6,SLC17A7,SLC17A8	GRM1	Prkca	ligand-receptor	Neurotransmitter
Glu_GRM1	ClusterNeuroblast	ClusterCA2.4_neurons	0.010632	GLS,SLC17A6,SLC17A7,SLC17A8	GRM1	Prkca	ligand-receptor	Neurotransmitter
Glu_GRM1	ClustermGC	ClusterCA2.4_neurons	0.022179	GLS,SLC17A6,SLC17A7,SLC17A8	GRM1	Prkca	ligand-receptor	Neurotransmitter
Glu_GRM1	ClusterCA2-4_neurons	ClusterCA_neurons	0.0195232	GLS,SLC17A6,SLC17A7,SLC17A8	GRM1	Prkca	ligand-receptor	Neurotransmitter
Glu_GRM1	ClusterCA_neurons	ClusterCA_neurons	0.0165191	GLS,SLC17A6,SLC17A7,SLC17A8	GRM1	Prkca	ligand-receptor	Neurotransmitter
Glu_GRM1	ClusterImmature	ClusterCA_neurons	0.0230594	GLS,SLC17A6,SLC17A7,SLC17A8	GRM1	Prkca	ligand-receptor	Neurotransmitter
Glu_GRM1	ClusterNeuroblast	ClusterCA_neurons	0.0088092	GLS,SLC17A6,SLC17A7,SLC17A8	GRM1	Prkca	ligand-receptor	Neurotransmitter
Glu_GRM1	ClustermGC	ClusterCA_neurons	0.0183765	GLS,SLC17A6,SLC17A7,SLC17A8	GRM1	Prkca	ligand-receptor	Neurotransmitter
Glu_GRM1	ClusterCA2-4_neurons	ClusterGABA_neurons	0.00505643	GLS,SLC17A6,SLC17A7,SLC17A8	GRM1	Prkca	ligand-receptor	Neurotransmitter
Glu_GRM1	ClusterCA_neurons	ClusterGABA_neurons	0.00427838	GLS,SLC17A6,SLC17A7,SLC17A8	GRM1	Prkca	ligand-receptor	Neurotransmitter
Glu_GRM1	ClusterImmature	ClusterGABA_neurons	0.00597229	GLS,SLC17A6,SLC17A7,SLC17A8	GRM1	Prkca	ligand-receptor	Neurotransmitter
Glu_GRM1	ClusterNeuroblast	ClusterGABA_neurons	0.00228155	GLS,SLC17A6,SLC17A7,SLC17A8	GRM1	Prkca	ligand-receptor	Neurotransmitter
Glu_GRM1	ClustermGC	ClusterGABA_neurons	0.00475944	GLS,SLC17A6,SLC17A7,SLC17A8	GRM1	Prkca	ligand-receptor	Neurotransmitter
Glu_GRM1	ClusterCA2-4_neurons	ClusterImmature	0.0313726	GLS,SLC17A6,SLC17A7,SLC17A8	GRM1	Prkca	ligand-receptor	Neurotransmitter
Glu_GRM1	ClusterCA_neurons	ClusterImmature	0.0265451	GLS,SLC17A6,SLC17A7,SLC17A8	GRM1	Prkca	ligand-receptor	Neurotransmitter
Glu_GRM1	ClusterImmature	ClusterImmature	0.037055	GLS,SLC17A6,SLC17A7,SLC17A8	GRM1	Prkca	ligand-receptor	Neurotransmitter
Glu_GRM1	ClusterNeuroblast	ClusterImmature	0.0141558	GLS,SLC17A6,SLC17A7,SLC17A8	GRM1	Prkca	ligand-receptor	Neurotransmitter
Glu_GRM1	ClustermGC	ClusterImmature	0.0295299	GLS,SLC17A6,SLC17A7,SLC17A8	GRM1	Prkca	ligand-receptor	Neurotransmitter
Glu_GRM1	ClusterCA2-4_neurons	ClustermGC	0.034944	GLS,SLC17A6,SLC17A7,SLC17A8	GRM1	Prkca	ligand-receptor	Neurotransmitter
Glu_GRM1	ClusterCA_neurons	ClustermGC	0.0295671	GLS,SLC17A6,SLC17A7,SLC17A8	GRM1	Prkca	ligand-receptor	Neurotransmitter
Glu_GRM1	ClusterImmature	ClustermGC	0.0412734	GLS,SLC17A6,SLC17A7,SLC17A8	GRM1	Prkca	ligand-receptor	Neurotransmitter
Glu_GRM1	ClusterNeuroblast	ClustermGC	0.0157673	GLS,SLC17A6,SLC17A7,SLC17A8	GRM1	Prkca	ligand-receptor	Neurotransmitter
Glu_GRM1	ClustermGC	ClustermGC	0.0328916	GLS,SLC17A6,SLC17A7,SLC17A8	GRM1	Prkca	ligand-receptor	Neurotransmitter
Glu_GRM3	ClusterCA2-4_neurons	ClusterAstrocytes	0.00384301	GLS,SLC17A6,SLC17A7,SLC17A8	GRM3		ligand-receptor	Neurotransmitter
Glu_GRM3	ClusterCA_neurons	ClusterAstrocytes	0.00325167	GLS,SLC17A6,SLC17A7,SLC17A8	GRM3		ligand-receptor	Neurotransmitter
Glu_GRM3	ClusterImmature	ClusterAstrocytes	0.00453909	GLS,SLC17A6,SLC17A7,SLC17A8	GRM3		ligand-receptor	Neurotransmitter
Glu_GRM3	ClusterNeuroblast	ClusterAstrocytes	0.00173403	GLS,SLC17A6,SLC17A7,SLC17A8	GRM3		ligand-receptor	Neurotransmitter
Glu_GRM3	ClustermGC	ClusterAstrocytes	0.00361729	GLS,SLC17A6,SLC17A7,SLC17A8	GRM3		ligand-receptor	Neurotransmitter
Glu_GRM3	ClusterCA2-4_neurons	ClusterCA_neurons	0.00642335	GLS,SLC17A6,SLC17A7,SLC17A8	GRM3		ligand-receptor	Neurotransmitter
Glu_GRM3	ClusterCA_neurons	ClusterCA_neurons	0.00543497	GLS,SLC17A6,SLC17A7,SLC17A8	GRM3		ligand-receptor	Neurotransmitter
Glu_GRM3	ClusterImmature	ClusterCA_neurons	0.0075868	GLS,SLC17A6,SLC17A7,SLC17A8	GRM3		ligand-receptor	Neurotransmitter
Glu_GRM3	ClusterNeuroblast	ClusterCA_neurons	0.00289832	GLS,SLC17A6,SLC17A7,SLC17A8	GRM3		ligand-receptor	Neurotransmitter
Glu_GRM3	ClustermGC	ClusterCA_neurons	0.00604608	GLS,SLC17A6,SLC17A7,SLC17A8	GRM3		ligand-receptor	Neurotransmitter
Glu_GRM3	ClusterCA2-4_neurons	ClusterEndothelial	0.00534213	GLS,SLC17A6,SLC17A7,SLC17A8	GRM3		ligand-receptor	Neurotransmitter
Glu_GRM3	ClusterCA_neurons	ClusterEndothelial	0.00452012	GLS,SLC17A6,SLC17A7,SLC17A8	GRM3		ligand-receptor	Neurotransmitter
Glu_GRM3	ClusterImmature	ClusterEndothelial	0.00630974	GLS,SLC17A6,SLC17A7,SLC17A8	GRM3		ligand-receptor	Neurotransmitter
Glu_GRM3	ClusterNeuroblast	ClusterEndothelial	0.00241046	GLS,SLC17A6,SLC17A7,SLC17A8	GRM3		ligand-receptor	Neurotransmitter
Glu_GRM3	ClustermGC	ClusterEndothelial	0.00502836	GLS,SLC17A6,SLC17A7,SLC17A8	GRM3		ligand-receptor	Neurotransmitter
Glu_GRM3	ClusterCA2-4_neurons	ClusterEpendymal	0.00336313	GLS,SLC17A6,SLC17A7,SLC17A8	GRM3		ligand-receptor	Neurotransmitter
Glu_GRM3	ClusterCA_neurons	ClusterEpendymal	0.00284563	GLS,SLC17A6,SLC17A7,SLC17A8	GRM3		ligand-receptor	Neurotransmitter
Glu_GRM3	ClusterImmature	ClusterEpendymal	0.00397228	GLS,SLC17A6,SLC17A7,SLC17A8	GRM3		ligand-receptor	Neurotransmitter
Glu_GRM3	ClusterNeuroblast	ClusterEpendymal	0.0015175	GLS,SLC17A6,SLC17A7,SLC17A8	GRM3		ligand-receptor	Neurotransmitter
Glu_GRM3	ClustermGC	ClusterEpendymal	0.00316559	GLS,SLC17A6,SLC17A7,SLC17A8	GRM3		ligand-receptor	Neurotransmitter
Glu_GRM3	ClusterCA2-4_neurons	ClusterGABA_neurons	0.00355981	GLS,SLC17A6,SLC17A7,SLC17A8	GRM3		ligand-receptor	Neurotransmitter
Glu_GRM3	ClusterCA_neurons	ClusterGABA_neurons	0.00301204	GLS,SLC17A6,SLC17A7,SLC17A8	GRM3		ligand-receptor	Neurotransmitter
Glu_GRM3	ClusterImmature	ClusterGABA_neurons	0.00420458	GLS,SLC17A6,SLC17A7,SLC17A8	GRM3		ligand-receptor	Neurotransmitter
Glu_GRM3	ClusterNeuroblast	ClusterGABA_neurons	0.00160624	GLS,SLC17A6,SLC17A7,SLC17A8	GRM3		ligand-receptor	Neurotransmitter
Glu_GRM3	ClustermGC	ClusterGABA_neurons	0.00335072	GLS,SLC17A6,SLC17A7,SLC17A8	GRM3		ligand-receptor	Neurotransmitter
Glu_GRM3	ClusterCA2-4_neurons	ClusterImmature	0.00702047	GLS,SLC17A6,SLC17A7,SLC17A8	GRM3		ligand-receptor	Neurotransmitter
Glu_GRM3	ClusterCA_neurons	ClusterImmature	0.0059402	GLS,SLC17A6,SLC17A7,SLC17A8	GRM3		ligand-receptor	Neurotransmitter
Glu_GRM3	ClusterImmature	ClusterImmature	0.00829207	GLS,SLC17A6,SLC17A7,SLC17A8	GRM3		ligand-receptor	Neurotransmitter
Glu_GRM3	ClusterNeuroblast	ClusterImmature	0.00316775	GLS,SLC17A6,SLC17A7,SLC17A8	GRM3		ligand-receptor	Neurotransmitter
Glu_GRM3	ClustermGC	ClusterImmature	0.00660812	GLS,SLC17A6,SLC17A7,SLC17A8	GRM3		ligand-receptor	Neurotransmitter
Glu_GRM3	ClusterCA2-4_neurons	ClusterNeural.Stem	0.0058037	GLS,SLC17A6,SLC17A7,SLC17A8	GRM3		ligand-receptor	Neurotransmitter
Glu_GRM3	ClusterCA_neurons	ClusterNeural.Stem	0.00491066	GLS,SLC17A6,SLC17A7,SLC17A8	GRM3		ligand-receptor	Neurotransmitter
Glu_GRM3	ClusterImmature	ClusterNeural.Stem	0.00685491	GLS,SLC17A6,SLC17A7,SLC17A8	GRM3		ligand-receptor	Neurotransmitter
Glu_GRM3	ClusterNeuroblast	ClusterNeural.Stem	0.00261873	GLS,SLC17A6,SLC17A7,SLC17A8	GRM3		ligand-receptor	Neurotransmitter
Glu_GRM3	ClustermGC	ClusterNeural.Stem	0.00546282	GLS,SLC17A6,SLC17A7,SLC17A8	GRM3		ligand-receptor	Neurotransmitter
Glu_GRM3	ClusterCA2-4_neurons	ClusterNeuroblast	0.0207518	GLS,SLC17A6,SLC17A7,SLC17A8	GRM3		ligand-receptor	Neurotransmitter
Glu_GRM3	ClusterCA_neurons	ClusterNeuroblast	0.0175587	GLS,SLC17A6,SLC17A7,SLC17A8	GRM3		ligand-receptor	Neurotransmitter
Glu_GRM3	ClusterImmature	ClusterNeuroblast	0.0245106	GLS,SLC17A6,SLC17A7,SLC17A8	GRM3		ligand-receptor	Neurotransmitter
Glu_GRM3	ClusterNeuroblast	ClusterNeuroblast	0.00936357	GLS,SLC17A6,SLC17A7,SLC17A8	GRM3		ligand-receptor	Neurotransmitter
Glu_GRM3	ClustermGC	ClusterNeuroblast	0.019533	GLS,SLC17A6,SLC17A7,SLC17A8	GRM3		ligand-receptor	Neurotransmitter
Glu_GRM3	ClusterCA2-4_neurons	ClustermGC	0.00993656	GLS,SLC17A6,SLC17A7,SLC17A8	GRM3		ligand-receptor	Neurotransmitter
Glu_GRM3	ClusterCA_neurons	ClustermGC	0.00840758	GLS,SLC17A6,SLC17A7,SLC17A8	GRM3		ligand-receptor	Neurotransmitter
Glu_GRM3	ClusterImmature	ClustermGC	0.0117363	GLS,SLC17A6,SLC17A7,SLC17A8	GRM3		ligand-receptor	Neurotransmitter
Glu_GRM3	ClusterNeuroblast	ClustermGC	0.00448354	GLS,SLC17A6,SLC17A7,SLC17A8	GRM3		ligand-receptor	Neurotransmitter
Glu_GRM3	ClustermGC	ClustermGC	0.00935294	GLS,SLC17A6,SLC17A7,SLC17A8	GRM3		ligand-receptor	Neurotransmitter
Glu_GRM3	ClusterCA2-4_neurons	ClustermOli	0.0318766	GLS,SLC17A6,SLC17A7,SLC17A8	GRM3		ligand-receptor	Neurotransmitter
Glu_GRM3	ClusterCA_neurons	ClustermOli	0.0269716	GLS,SLC17A6,SLC17A7,SLC17A8	GRM3		ligand-receptor	Neurotransmitter
Glu_GRM3	ClusterImmature	ClustermOli	0.0376503	GLS,SLC17A6,SLC17A7,SLC17A8	GRM3		ligand-receptor	Neurotransmitter
Glu_GRM3	ClusterNeuroblast	ClustermOli	0.0143833	GLS,SLC17A6,SLC17A7,SLC17A8	GRM3		ligand-receptor	Neurotransmitter
Glu_GRM3	ClustermGC	ClustermOli	0.0300043	GLS,SLC17A6,SLC17A7,SLC17A8	GRM3		ligand-receptor	Neurotransmitter
Glu_GRM5	ClusterCA2-4_neurons	ClusterCA2.4_neurons	0.0346137	GLS,SLC17A6,SLC17A7,SLC17A8	GRM5	Prkcq,Prkcz,Prkcg,Prkcb,Prkca,Prkce,Prkcd	ligand-receptor	Neurotransmitter
Glu_GRM5	ClusterCA_neurons	ClusterCA2.4_neurons	0.0292875	GLS,SLC17A6,SLC17A7,SLC17A8	GRM5	Prkcq,Prkcz,Prkcg,Prkcb,Prkca,Prkce,Prkcd	ligand-receptor	Neurotransmitter
Glu_GRM5	ClusterImmature	ClusterCA2.4_neurons	0.0408831	GLS,SLC17A6,SLC17A7,SLC17A8	GRM5	Prkcq,Prkcz,Prkcg,Prkcb,Prkca,Prkce,Prkcd	ligand-receptor	Neurotransmitter
Glu_GRM5	ClusterNeuroblast	ClusterCA2.4_neurons	0.0156183	GLS,SLC17A6,SLC17A7,SLC17A8	GRM5	Prkcq,Prkcz,Prkcg,Prkcb,Prkca,Prkce,Prkcd	ligand-receptor	Neurotransmitter
Glu_GRM5	ClustermGC	ClusterCA2.4_neurons	0.0325806	GLS,SLC17A6,SLC17A7,SLC17A8	GRM5	Prkcq,Prkcz,Prkcg,Prkcb,Prkca,Prkce,Prkcd	ligand-receptor	Neurotransmitter
Glu_GRM5	ClusterCA2-4_neurons	ClusterCA_neurons	0.0368217	GLS,SLC17A6,SLC17A7,SLC17A8	GRM5	Prkcq,Prkcz,Prkcg,Prkcb,Prkca,Prkce,Prkcd	ligand-receptor	Neurotransmitter
Glu_GRM5	ClusterCA_neurons	ClusterCA_neurons	0.0311558	GLS,SLC17A6,SLC17A7,SLC17A8	GRM5	Prkcq,Prkcz,Prkcg,Prkcb,Prkca,Prkce,Prkcd	ligand-receptor	Neurotransmitter
Glu_GRM5	ClusterImmature	ClusterCA_neurons	0.0434912	GLS,SLC17A6,SLC17A7,SLC17A8	GRM5	Prkcq,Prkcz,Prkcg,Prkcb,Prkca,Prkce,Prkcd	ligand-receptor	Neurotransmitter
Glu_GRM5	ClusterNeuroblast	ClusterCA_neurons	0.0166146	GLS,SLC17A6,SLC17A7,SLC17A8	GRM5	Prkcq,Prkcz,Prkcg,Prkcb,Prkca,Prkce,Prkcd	ligand-receptor	Neurotransmitter
Glu_GRM5	ClustermGC	ClusterCA_neurons	0.034659	GLS,SLC17A6,SLC17A7,SLC17A8	GRM5	Prkcq,Prkcz,Prkcg,Prkcb,Prkca,Prkce,Prkcd	ligand-receptor	Neurotransmitter
Glu_GRM5	ClusterCA2-4_neurons	ClusterEpendymal	0.00238489	GLS,SLC17A6,SLC17A7,SLC17A8	GRM5	Prkcq,Prkcz,Prkcg,Prkcb,Prkca,Prkce,Prkcd	ligand-receptor	Neurotransmitter
Glu_GRM5	ClusterCA_neurons	ClusterEpendymal	0.00201792	GLS,SLC17A6,SLC17A7,SLC17A8	GRM5	Prkcq,Prkcz,Prkcg,Prkcb,Prkca,Prkce,Prkcd	ligand-receptor	Neurotransmitter
Glu_GRM5	ClusterImmature	ClusterEpendymal	0.00281686	GLS,SLC17A6,SLC17A7,SLC17A8	GRM5	Prkcq,Prkcz,Prkcg,Prkcb,Prkca,Prkce,Prkcd	ligand-receptor	Neurotransmitter
Glu_GRM5	ClusterNeuroblast	ClusterEpendymal	0.0010761	GLS,SLC17A6,SLC17A7,SLC17A8	GRM5	Prkcq,Prkcz,Prkcg,Prkcb,Prkca,Prkce,Prkcd	ligand-receptor	Neurotransmitter
Glu_GRM5	ClustermGC	ClusterEpendymal	0.00224481	GLS,SLC17A6,SLC17A7,SLC17A8	GRM5	Prkcq,Prkcz,Prkcg,Prkcb,Prkca,Prkce,Prkcd	ligand-receptor	Neurotransmitter
Glu_GRM5	ClusterCA2-4_neurons	ClusterGABA_neurons	0.0340545	GLS,SLC17A6,SLC17A7,SLC17A8	GRM5	Prkcq,Prkcz,Prkcg,Prkcb,Prkca,Prkce,Prkcd	ligand-receptor	Neurotransmitter
Glu_GRM5	ClusterCA_neurons	ClusterGABA_neurons	0.0288144	GLS,SLC17A6,SLC17A7,SLC17A8	GRM5	Prkcq,Prkcz,Prkcg,Prkcb,Prkca,Prkce,Prkcd	ligand-receptor	Neurotransmitter
Glu_GRM5	ClusterImmature	ClusterGABA_neurons	0.0402228	GLS,SLC17A6,SLC17A7,SLC17A8	GRM5	Prkcq,Prkcz,Prkcg,Prkcb,Prkca,Prkce,Prkcd	ligand-receptor	Neurotransmitter
Glu_GRM5	ClusterNeuroblast	ClusterGABA_neurons	0.015366	GLS,SLC17A6,SLC17A7,SLC17A8	GRM5	Prkcq,Prkcz,Prkcg,Prkcb,Prkca,Prkce,Prkcd	ligand-receptor	Neurotransmitter
Glu_GRM5	ClustermGC	ClusterGABA_neurons	0.0320543	GLS,SLC17A6,SLC17A7,SLC17A8	GRM5	Prkcq,Prkcz,Prkcg,Prkcb,Prkca,Prkce,Prkcd	ligand-receptor	Neurotransmitter
Glu_GRM5	ClusterCA2-4_neurons	ClusterImmature	0.0338399	GLS,SLC17A6,SLC17A7,SLC17A8	GRM5	Prkcq,Prkcz,Prkcg,Prkcb,Prkca,Prkce,Prkcd	ligand-receptor	Neurotransmitter
Glu_GRM5	ClusterCA_neurons	ClusterImmature	0.0286328	GLS,SLC17A6,SLC17A7,SLC17A8	GRM5	Prkcq,Prkcz,Prkcg,Prkcb,Prkca,Prkce,Prkcd	ligand-receptor	Neurotransmitter
Glu_GRM5	ClusterImmature	ClusterImmature	0.0399693	GLS,SLC17A6,SLC17A7,SLC17A8	GRM5	Prkcq,Prkcz,Prkcg,Prkcb,Prkca,Prkce,Prkcd	ligand-receptor	Neurotransmitter
Glu_GRM5	ClusterNeuroblast	ClusterImmature	0.0152691	GLS,SLC17A6,SLC17A7,SLC17A8	GRM5	Prkcq,Prkcz,Prkcg,Prkcb,Prkca,Prkce,Prkcd	ligand-receptor	Neurotransmitter
Glu_GRM5	ClustermGC	ClusterImmature	0.0318523	GLS,SLC17A6,SLC17A7,SLC17A8	GRM5	Prkcq,Prkcz,Prkcg,Prkcb,Prkca,Prkce,Prkcd	ligand-receptor	Neurotransmitter
Glu_GRM5	ClusterCA2-4_neurons	ClusterOPCs	0.0299637	GLS,SLC17A6,SLC17A7,SLC17A8	GRM5	Prkcq,Prkcz,Prkcg,Prkcb,Prkca,Prkce,Prkcd	ligand-receptor	Neurotransmitter
Glu_GRM5	ClusterCA_neurons	ClusterOPCs	0.025353	GLS,SLC17A6,SLC17A7,SLC17A8	GRM5	Prkcq,Prkcz,Prkcg,Prkcb,Prkca,Prkce,Prkcd	ligand-receptor	Neurotransmitter
Glu_GRM5	ClusterImmature	ClusterOPCs	0.0353909	GLS,SLC17A6,SLC17A7,SLC17A8	GRM5	Prkcq,Prkcz,Prkcg,Prkcb,Prkca,Prkce,Prkcd	ligand-receptor	Neurotransmitter
Glu_GRM5	ClusterNeuroblast	ClusterOPCs	0.0135201	GLS,SLC17A6,SLC17A7,SLC17A8	GRM5	Prkcq,Prkcz,Prkcg,Prkcb,Prkca,Prkce,Prkcd	ligand-receptor	Neurotransmitter
Glu_GRM5	ClustermGC	ClusterOPCs	0.0282037	GLS,SLC17A6,SLC17A7,SLC17A8	GRM5	Prkcq,Prkcz,Prkcg,Prkcb,Prkca,Prkce,Prkcd	ligand-receptor	Neurotransmitter
Glu_GRM5	ClusterCA2-4_neurons	ClustermGC	0.0341507	GLS,SLC17A6,SLC17A7,SLC17A8	GRM5	Prkcq,Prkcz,Prkcg,Prkcb,Prkca,Prkce,Prkcd	ligand-receptor	Neurotransmitter
Glu_GRM5	ClusterCA_neurons	ClustermGC	0.0288958	GLS,SLC17A6,SLC17A7,SLC17A8	GRM5	Prkcq,Prkcz,Prkcg,Prkcb,Prkca,Prkce,Prkcd	ligand-receptor	Neurotransmitter
Glu_GRM5	ClusterImmature	ClustermGC	0.0403364	GLS,SLC17A6,SLC17A7,SLC17A8	GRM5	Prkcq,Prkcz,Prkcg,Prkcb,Prkca,Prkce,Prkcd	ligand-receptor	Neurotransmitter
Glu_GRM5	ClusterNeuroblast	ClustermGC	0.0154094	GLS,SLC17A6,SLC17A7,SLC17A8	GRM5	Prkcq,Prkcz,Prkcg,Prkcb,Prkca,Prkce,Prkcd	ligand-receptor	Neurotransmitter
Glu_GRM5	ClustermGC	ClustermGC	0.0321449	GLS,SLC17A6,SLC17A7,SLC17A8	GRM5	Prkcq,Prkcz,Prkcg,Prkcb,Prkca,Prkce,Prkcd	ligand-receptor	Neurotransmitter
Glu_GRM7	ClusterCA2-4_neurons	ClusterCA2.4_neurons	0.0365997	GLS,SLC17A6,SLC17A7,SLC17A8	GRM7	Prkca,Prkaca,Prkg2	ligand-receptor	Neurotransmitter
Glu_GRM7	ClusterCA_neurons	ClusterCA2.4_neurons	0.0309679	GLS,SLC17A6,SLC17A7,SLC17A8	GRM7	Prkca,Prkaca,Prkg2	ligand-receptor	Neurotransmitter
Glu_GRM7	ClusterImmature	ClusterCA2.4_neurons	0.0432289	GLS,SLC17A6,SLC17A7,SLC17A8	GRM7	Prkca,Prkaca,Prkg2	ligand-receptor	Neurotransmitter
Glu_GRM7	ClusterNeuroblast	ClusterCA2.4_neurons	0.0165144	GLS,SLC17A6,SLC17A7,SLC17A8	GRM7	Prkca,Prkaca,Prkg2	ligand-receptor	Neurotransmitter
Glu_GRM7	ClustermGC	ClusterCA2.4_neurons	0.03445	GLS,SLC17A6,SLC17A7,SLC17A8	GRM7	Prkca,Prkaca,Prkg2	ligand-receptor	Neurotransmitter
Glu_GRM7	ClusterCA2-4_neurons	ClusterCA_neurons	0.0340758	GLS,SLC17A6,SLC17A7,SLC17A8	GRM7	Prkca,Prkaca,Prkg2	ligand-receptor	Neurotransmitter
Glu_GRM7	ClusterCA_neurons	ClusterCA_neurons	0.0288324	GLS,SLC17A6,SLC17A7,SLC17A8	GRM7	Prkca,Prkaca,Prkg2	ligand-receptor	Neurotransmitter
Glu_GRM7	ClusterImmature	ClusterCA_neurons	0.0402478	GLS,SLC17A6,SLC17A7,SLC17A8	GRM7	Prkca,Prkaca,Prkg2	ligand-receptor	Neurotransmitter
Glu_GRM7	ClusterNeuroblast	ClusterCA_neurons	0.0153756	GLS,SLC17A6,SLC17A7,SLC17A8	GRM7	Prkca,Prkaca,Prkg2	ligand-receptor	Neurotransmitter
Glu_GRM7	ClustermGC	ClusterCA_neurons	0.0320743	GLS,SLC17A6,SLC17A7,SLC17A8	GRM7	Prkca,Prkaca,Prkg2	ligand-receptor	Neurotransmitter
Glu_GRM7	ClusterCA2-4_neurons	ClusterEpendymal	0.00154706	GLS,SLC17A6,SLC17A7,SLC17A8	GRM7	Prkca,Prkaca,Prkg2	ligand-receptor	Neurotransmitter
Glu_GRM7	ClusterCA_neurons	ClusterEpendymal	0.00130901	GLS,SLC17A6,SLC17A7,SLC17A8	GRM7	Prkca,Prkaca,Prkg2	ligand-receptor	Neurotransmitter
Glu_GRM7	ClusterImmature	ClusterEpendymal	0.00182728	GLS,SLC17A6,SLC17A7,SLC17A8	GRM7	Prkca,Prkaca,Prkg2	ligand-receptor	Neurotransmitter
Glu_GRM7	ClusterNeuroblast	ClusterEpendymal	0.00069806	GLS,SLC17A6,SLC17A7,SLC17A8	GRM7	Prkca,Prkaca,Prkg2	ligand-receptor	Neurotransmitter
Glu_GRM7	ClustermGC	ClusterEpendymal	0.0014562	GLS,SLC17A6,SLC17A7,SLC17A8	GRM7	Prkca,Prkaca,Prkg2	ligand-receptor	Neurotransmitter
Glu_GRM7	ClusterCA2-4_neurons	ClusterGABA_neurons	0.0288601	GLS,SLC17A6,SLC17A7,SLC17A8	GRM7	Prkca,Prkaca,Prkg2	ligand-receptor	Neurotransmitter
Glu_GRM7	ClusterCA_neurons	ClusterGABA_neurons	0.0244193	GLS,SLC17A6,SLC17A7,SLC17A8	GRM7	Prkca,Prkaca,Prkg2	ligand-receptor	Neurotransmitter
Glu_GRM7	ClusterImmature	ClusterGABA_neurons	0.0340875	GLS,SLC17A6,SLC17A7,SLC17A8	GRM7	Prkca,Prkaca,Prkg2	ligand-receptor	Neurotransmitter
Glu_GRM7	ClusterNeuroblast	ClusterGABA_neurons	0.0130222	GLS,SLC17A6,SLC17A7,SLC17A8	GRM7	Prkca,Prkaca,Prkg2	ligand-receptor	Neurotransmitter
Glu_GRM7	ClustermGC	ClusterGABA_neurons	0.027165	GLS,SLC17A6,SLC17A7,SLC17A8	GRM7	Prkca,Prkaca,Prkg2	ligand-receptor	Neurotransmitter
Glu_GRM7	ClusterCA2-4_neurons	ClusterImmature	0.0379607	GLS,SLC17A6,SLC17A7,SLC17A8	GRM7	Prkca,Prkaca,Prkg2	ligand-receptor	Neurotransmitter
Glu_GRM7	ClusterCA_neurons	ClusterImmature	0.0321195	GLS,SLC17A6,SLC17A7,SLC17A8	GRM7	Prkca,Prkaca,Prkg2	ligand-receptor	Neurotransmitter
Glu_GRM7	ClusterImmature	ClusterImmature	0.0448364	GLS,SLC17A6,SLC17A7,SLC17A8	GRM7	Prkca,Prkaca,Prkg2	ligand-receptor	Neurotransmitter
Glu_GRM7	ClusterNeuroblast	ClusterImmature	0.0171285	GLS,SLC17A6,SLC17A7,SLC17A8	GRM7	Prkca,Prkaca,Prkg2	ligand-receptor	Neurotransmitter
Glu_GRM7	ClustermGC	ClusterImmature	0.0357311	GLS,SLC17A6,SLC17A7,SLC17A8	GRM7	Prkca,Prkaca,Prkg2	ligand-receptor	Neurotransmitter
Glu_GRM7	ClusterCA2-4_neurons	ClusterOPCs	0.035445	GLS,SLC17A6,SLC17A7,SLC17A8	GRM7	Prkca,Prkaca,Prkg2	ligand-receptor	Neurotransmitter
Glu_GRM7	ClusterCA_neurons	ClusterOPCs	0.029991	GLS,SLC17A6,SLC17A7,SLC17A8	GRM7	Prkca,Prkaca,Prkg2	ligand-receptor	Neurotransmitter
Glu_GRM7	ClusterImmature	ClusterOPCs	0.0418651	GLS,SLC17A6,SLC17A7,SLC17A8	GRM7	Prkca,Prkaca,Prkg2	ligand-receptor	Neurotransmitter
Glu_GRM7	ClusterNeuroblast	ClusterOPCs	0.0159934	GLS,SLC17A6,SLC17A7,SLC17A8	GRM7	Prkca,Prkaca,Prkg2	ligand-receptor	Neurotransmitter
Glu_GRM7	ClustermGC	ClusterOPCs	0.0333632	GLS,SLC17A6,SLC17A7,SLC17A8	GRM7	Prkca,Prkaca,Prkg2	ligand-receptor	Neurotransmitter
Glu_GRM7	ClusterCA2-4_neurons	ClustermGC	0.0396367	GLS,SLC17A6,SLC17A7,SLC17A8	GRM7	Prkca,Prkaca,Prkg2	ligand-receptor	Neurotransmitter
Glu_GRM7	ClusterCA_neurons	ClustermGC	0.0335376	GLS,SLC17A6,SLC17A7,SLC17A8	GRM7	Prkca,Prkaca,Prkg2	ligand-receptor	Neurotransmitter
Glu_GRM7	ClusterImmature	ClustermGC	0.046816	GLS,SLC17A6,SLC17A7,SLC17A8	GRM7	Prkca,Prkaca,Prkg2	ligand-receptor	Neurotransmitter
Glu_GRM7	ClusterNeuroblast	ClustermGC	0.0178847	GLS,SLC17A6,SLC17A7,SLC17A8	GRM7	Prkca,Prkaca,Prkg2	ligand-receptor	Neurotransmitter
Glu_GRM7	ClustermGC	ClustermGC	0.0373086	GLS,SLC17A6,SLC17A7,SLC17A8	GRM7	Prkca,Prkaca,Prkg2	ligand-receptor	Neurotransmitter
Glu_GRM8	ClusterCA2-4_neurons	ClusterCA_neurons	0.00265006	GLS,SLC17A6,SLC17A7,SLC17A8	GRM8		ligand-receptor	Neurotransmitter
Glu_GRM8	ClusterCA_neurons	ClusterCA_neurons	0.00224228	GLS,SLC17A6,SLC17A7,SLC17A8	GRM8		ligand-receptor	Neurotransmitter
Glu_GRM8	ClusterImmature	ClusterCA_neurons	0.00313006	GLS,SLC17A6,SLC17A7,SLC17A8	GRM8		ligand-receptor	Neurotransmitter
Glu_GRM8	ClusterNeuroblast	ClusterCA_neurons	0.00119575	GLS,SLC17A6,SLC17A7,SLC17A8	GRM8		ligand-receptor	Neurotransmitter
Glu_GRM8	ClustermGC	ClusterCA_neurons	0.00249441	GLS,SLC17A6,SLC17A7,SLC17A8	GRM8		ligand-receptor	Neurotransmitter
Glu_GRM8	ClusterCA2-4_neurons	ClusterEndothelial	0.00488604	GLS,SLC17A6,SLC17A7,SLC17A8	GRM8		ligand-receptor	Neurotransmitter
Glu_GRM8	ClusterCA_neurons	ClusterEndothelial	0.0041342	GLS,SLC17A6,SLC17A7,SLC17A8	GRM8		ligand-receptor	Neurotransmitter
Glu_GRM8	ClusterImmature	ClusterEndothelial	0.00577103	GLS,SLC17A6,SLC17A7,SLC17A8	GRM8		ligand-receptor	Neurotransmitter
Glu_GRM8	ClusterNeuroblast	ClusterEndothelial	0.00220466	GLS,SLC17A6,SLC17A7,SLC17A8	GRM8		ligand-receptor	Neurotransmitter
Glu_GRM8	ClustermGC	ClusterEndothelial	0.00459906	GLS,SLC17A6,SLC17A7,SLC17A8	GRM8		ligand-receptor	Neurotransmitter
Glu_GRM8	ClusterCA2-4_neurons	ClusterEpendymal	0.00321054	GLS,SLC17A6,SLC17A7,SLC17A8	GRM8		ligand-receptor	Neurotransmitter
Glu_GRM8	ClusterCA_neurons	ClusterEpendymal	0.00271652	GLS,SLC17A6,SLC17A7,SLC17A8	GRM8		ligand-receptor	Neurotransmitter
Glu_GRM8	ClusterImmature	ClusterEpendymal	0.00379206	GLS,SLC17A6,SLC17A7,SLC17A8	GRM8		ligand-receptor	Neurotransmitter
Glu_GRM8	ClusterNeuroblast	ClusterEpendymal	0.00144865	GLS,SLC17A6,SLC17A7,SLC17A8	GRM8		ligand-receptor	Neurotransmitter
Glu_GRM8	ClustermGC	ClusterEpendymal	0.00302197	GLS,SLC17A6,SLC17A7,SLC17A8	GRM8		ligand-receptor	Neurotransmitter
Glu_GRM8	ClusterCA2-4_neurons	ClusterGABA_neurons	0.00429442	GLS,SLC17A6,SLC17A7,SLC17A8	GRM8		ligand-receptor	Neurotransmitter
Glu_GRM8	ClusterCA_neurons	ClusterGABA_neurons	0.00363362	GLS,SLC17A6,SLC17A7,SLC17A8	GRM8		ligand-receptor	Neurotransmitter
Glu_GRM8	ClusterImmature	ClusterGABA_neurons	0.00507226	GLS,SLC17A6,SLC17A7,SLC17A8	GRM8		ligand-receptor	Neurotransmitter
Glu_GRM8	ClusterNeuroblast	ClusterGABA_neurons	0.00193771	GLS,SLC17A6,SLC17A7,SLC17A8	GRM8		ligand-receptor	Neurotransmitter
Glu_GRM8	ClustermGC	ClusterGABA_neurons	0.00404219	GLS,SLC17A6,SLC17A7,SLC17A8	GRM8		ligand-receptor	Neurotransmitter
Glu_GRM8	ClusterCA2-4_neurons	ClustermGC	0.00158608	GLS,SLC17A6,SLC17A7,SLC17A8	GRM8		ligand-receptor	Neurotransmitter
Glu_GRM8	ClusterCA_neurons	ClustermGC	0.00134202	GLS,SLC17A6,SLC17A7,SLC17A8	GRM8		ligand-receptor	Neurotransmitter
Glu_GRM8	ClusterImmature	ClustermGC	0.00187336	GLS,SLC17A6,SLC17A7,SLC17A8	GRM8		ligand-receptor	Neurotransmitter
Glu_GRM8	ClusterNeuroblast	ClustermGC	0.000715665	GLS,SLC17A6,SLC17A7,SLC17A8	GRM8		ligand-receptor	Neurotransmitter
Glu_GRM8	ClustermGC	ClustermGC	0.00149292	GLS,SLC17A6,SLC17A7,SLC17A8	GRM8		ligand-receptor	Neurotransmitter
NO_GUCY1A1	ClusterGABA_neurons	ClusterCA2.4_neurons	4.14851e-05	NOS1,NOS2,NOS3	GUCY1A1		gas-effector	Gas
NO_GUCY1A1	ClusterOPCs	ClusterCA2.4_neurons	0.000175669	NOS1,NOS2,NOS3	GUCY1A1		gas-effector	Gas
NO_GUCY1A1	ClusterGABA_neurons	ClusterCA_neurons	4.56572e-05	NOS1,NOS2,NOS3	GUCY1A1		gas-effector	Gas
NO_GUCY1A1	ClusterOPCs	ClusterCA_neurons	0.000193335	NOS1,NOS2,NOS3	GUCY1A1		gas-effector	Gas
NO_GUCY1A1	ClusterGABA_neurons	ClusterEndothelial	5.74376e-05	NOS1,NOS2,NOS3	GUCY1A1		gas-effector	Gas
NO_GUCY1A1	ClusterOPCs	ClusterEndothelial	0.00024322	NOS1,NOS2,NOS3	GUCY1A1		gas-effector	Gas
NO_GUCY1A1	ClusterGABA_neurons	ClusterGABA_neurons	7.9406e-05	NOS1,NOS2,NOS3	GUCY1A1		gas-effector	Gas
NO_GUCY1A1	ClusterOPCs	ClusterGABA_neurons	0.000336245	NOS1,NOS2,NOS3	GUCY1A1		gas-effector	Gas
NO_GUCY1A1	ClusterGABA_neurons	ClusterImmature	0.000211379	NOS1,NOS2,NOS3	GUCY1A1		gas-effector	Gas
NO_GUCY1A1	ClusterOPCs	ClusterImmature	0.000895084	NOS1,NOS2,NOS3	GUCY1A1		gas-effector	Gas
NO_GUCY1A1	ClusterGABA_neurons	ClustermGC	0.00018307	NOS1,NOS2,NOS3	GUCY1A1		gas-effector	Gas
NO_GUCY1A1	ClusterOPCs	ClustermGC	0.00077521	NOS1,NOS2,NOS3	GUCY1A1		gas-effector	Gas
NO_GUCY1A2	ClusterGABA_neurons	ClusterCA2.4_neurons	0.000696012	NOS1,NOS2,NOS3	GUCY1A2		gas-effector	Gas
NO_GUCY1A2	ClusterOPCs	ClusterCA2.4_neurons	0.00294726	NOS1,NOS2,NOS3	GUCY1A2		gas-effector	Gas
NO_GUCY1A2	ClusterGABA_neurons	ClusterCA_neurons	0.000652225	NOS1,NOS2,NOS3	GUCY1A2		gas-effector	Gas
NO_GUCY1A2	ClusterOPCs	ClusterCA_neurons	0.00276185	NOS1,NOS2,NOS3	GUCY1A2		gas-effector	Gas
NO_GUCY1A2	ClusterGABA_neurons	ClusterEndothelial	0.00011147	NOS1,NOS2,NOS3	GUCY1A2		gas-effector	Gas
NO_GUCY1A2	ClusterOPCs	ClusterEndothelial	0.000472018	NOS1,NOS2,NOS3	GUCY1A2		gas-effector	Gas
NO_GUCY1A2	ClusterGABA_neurons	ClusterGABA_neurons	0.000346586	NOS1,NOS2,NOS3	GUCY1A2		gas-effector	Gas
NO_GUCY1A2	ClusterOPCs	ClusterGABA_neurons	0.00146762	NOS1,NOS2,NOS3	GUCY1A2		gas-effector	Gas
NO_GUCY1A2	ClusterGABA_neurons	ClusterImmature	0.000707248	NOS1,NOS2,NOS3	GUCY1A2		gas-effector	Gas
NO_GUCY1A2	ClusterOPCs	ClusterImmature	0.00299484	NOS1,NOS2,NOS3	GUCY1A2		gas-effector	Gas
NO_GUCY1A2	ClusterGABA_neurons	ClusterOPCs	0.000423612	NOS1,NOS2,NOS3	GUCY1A2		gas-effector	Gas
NO_GUCY1A2	ClusterOPCs	ClusterOPCs	0.00179379	NOS1,NOS2,NOS3	GUCY1A2		gas-effector	Gas
NO_GUCY1A2	ClusterGABA_neurons	ClustermGC	0.000746377	NOS1,NOS2,NOS3	GUCY1A2		gas-effector	Gas
NO_GUCY1A2	ClusterOPCs	ClustermGC	0.00316054	NOS1,NOS2,NOS3	GUCY1A2		gas-effector	Gas
NO_GUCY1B1	ClusterGABA_neurons	ClusterCA2.4_neurons	0.000149499	NOS1,NOS2,NOS3	GUCY1B1		gas-effector	Gas
NO_GUCY1B1	ClusterOPCs	ClusterCA2.4_neurons	0.000633053	NOS1,NOS2,NOS3	GUCY1B1		gas-effector	Gas
NO_GUCY1B1	ClusterGABA_neurons	ClusterCA_neurons	0.000176528	NOS1,NOS2,NOS3	GUCY1B1		gas-effector	Gas
NO_GUCY1B1	ClusterOPCs	ClusterCA_neurons	0.000747508	NOS1,NOS2,NOS3	GUCY1B1		gas-effector	Gas
NO_GUCY1B1	ClusterGABA_neurons	ClusterEndothelial	5.65955e-05	NOS1,NOS2,NOS3	GUCY1B1		gas-effector	Gas
NO_GUCY1B1	ClusterOPCs	ClusterEndothelial	0.000239653	NOS1,NOS2,NOS3	GUCY1B1		gas-effector	Gas
NO_GUCY1B1	ClusterGABA_neurons	ClusterEpendymal	2.92999e-05	NOS1,NOS2,NOS3	GUCY1B1		gas-effector	Gas
NO_GUCY1B1	ClusterOPCs	ClusterEpendymal	0.00012407	NOS1,NOS2,NOS3	GUCY1B1		gas-effector	Gas
NO_GUCY1B1	ClusterGABA_neurons	ClusterGABA_neurons	0.000209712	NOS1,NOS2,NOS3	GUCY1B1		gas-effector	Gas
NO_GUCY1B1	ClusterOPCs	ClusterGABA_neurons	0.000888026	NOS1,NOS2,NOS3	GUCY1B1		gas-effector	Gas
NO_GUCY1B1	ClusterGABA_neurons	ClusterImmature	0.00025639	NOS1,NOS2,NOS3	GUCY1B1		gas-effector	Gas
NO_GUCY1B1	ClusterOPCs	ClusterImmature	0.00108569	NOS1,NOS2,NOS3	GUCY1B1		gas-effector	Gas
NO_GUCY1B1	ClusterGABA_neurons	ClustermGC	0.000205728	NOS1,NOS2,NOS3	GUCY1B1		gas-effector	Gas
NO_GUCY1B1	ClusterOPCs	ClustermGC	0.000871156	NOS1,NOS2,NOS3	GUCY1B1		gas-effector	Gas
NRXN1_NLGN1	ClusterAstrocytes	ClusterCA2.4_neurons	0.319084	NRXN1	NLGN1	Nrxn2,Nrxn1,Nrxn3	ligand-receptor	Synaptic adhesion molecule
NRXN1_NLGN1	ClusterCA2-4_neurons	ClusterCA2.4_neurons	0.299495	NRXN1	NLGN1	Nrxn2,Nrxn1,Nrxn3	ligand-receptor	Synaptic adhesion molecule
NRXN1_NLGN1	ClusterCA_neurons	ClusterCA2.4_neurons	0.309296	NRXN1	NLGN1	Nrxn2,Nrxn1,Nrxn3	ligand-receptor	Synaptic adhesion molecule
NRXN1_NLGN1	ClusterGABA_neurons	ClusterCA2.4_neurons	0.312922	NRXN1	NLGN1	Nrxn2,Nrxn1,Nrxn3	ligand-receptor	Synaptic adhesion molecule
NRXN1_NLGN1	ClusterImmature	ClusterCA2.4_neurons	0.315401	NRXN1	NLGN1	Nrxn2,Nrxn1,Nrxn3	ligand-receptor	Synaptic adhesion molecule
NRXN1_NLGN1	ClusterNeural Stem	ClusterCA2.4_neurons	0.243688	NRXN1	NLGN1	Nrxn2,Nrxn1,Nrxn3	ligand-receptor	Synaptic adhesion molecule
NRXN1_NLGN1	ClusterOPCs	ClusterCA2.4_neurons	0.34803	NRXN1	NLGN1	Nrxn2,Nrxn1,Nrxn3	ligand-receptor	Synaptic adhesion molecule
NRXN1_NLGN1	ClustermGC	ClusterCA2.4_neurons	0.323731	NRXN1	NLGN1	Nrxn2,Nrxn1,Nrxn3	ligand-receptor	Synaptic adhesion molecule
NRXN1_NLGN1	ClusterAstrocytes	ClusterCA_neurons	0.275746	NRXN1	NLGN1	Nrxn2,Nrxn1,Nrxn3	ligand-receptor	Synaptic adhesion molecule
NRXN1_NLGN1	ClusterCA2-4_neurons	ClusterCA_neurons	0.258817	NRXN1	NLGN1	Nrxn2,Nrxn1,Nrxn3	ligand-receptor	Synaptic adhesion molecule
NRXN1_NLGN1	ClusterCA_neurons	ClusterCA_neurons	0.267287	NRXN1	NLGN1	Nrxn2,Nrxn1,Nrxn3	ligand-receptor	Synaptic adhesion molecule
NRXN1_NLGN1	ClusterGABA_neurons	ClusterCA_neurons	0.270421	NRXN1	NLGN1	Nrxn2,Nrxn1,Nrxn3	ligand-receptor	Synaptic adhesion molecule
NRXN1_NLGN1	ClusterImmature	ClusterCA_neurons	0.272563	NRXN1	NLGN1	Nrxn2,Nrxn1,Nrxn3	ligand-receptor	Synaptic adhesion molecule
NRXN1_NLGN1	ClusterNeural Stem	ClusterCA_neurons	0.21059	NRXN1	NLGN1	Nrxn2,Nrxn1,Nrxn3	ligand-receptor	Synaptic adhesion molecule
NRXN1_NLGN1	ClusterOPCs	ClusterCA_neurons	0.30076	NRXN1	NLGN1	Nrxn2,Nrxn1,Nrxn3	ligand-receptor	Synaptic adhesion molecule
NRXN1_NLGN1	ClustermGC	ClusterCA_neurons	0.279761	NRXN1	NLGN1	Nrxn2,Nrxn1,Nrxn3	ligand-receptor	Synaptic adhesion molecule
NRXN1_NLGN1	ClusterOPCs	ClusterEpendymal	0.163116	NRXN1	NLGN1	Nrxn2,Nrxn1,Nrxn3	ligand-receptor	Synaptic adhesion molecule
NRXN1_NLGN1	ClusterAstrocytes	ClusterGABA_neurons	0.267402	NRXN1	NLGN1	Nrxn2,Nrxn1,Nrxn3	ligand-receptor	Synaptic adhesion molecule
NRXN1_NLGN1	ClusterCA2-4_neurons	ClusterGABA_neurons	0.250986	NRXN1	NLGN1	Nrxn2,Nrxn1,Nrxn3	ligand-receptor	Synaptic adhesion molecule
NRXN1_NLGN1	ClusterCA_neurons	ClusterGABA_neurons	0.2592	NRXN1	NLGN1	Nrxn2,Nrxn1,Nrxn3	ligand-receptor	Synaptic adhesion molecule
NRXN1_NLGN1	ClusterGABA_neurons	ClusterGABA_neurons	0.262239	NRXN1	NLGN1	Nrxn2,Nrxn1,Nrxn3	ligand-receptor	Synaptic adhesion molecule
NRXN1_NLGN1	ClusterImmature	ClusterGABA_neurons	0.264316	NRXN1	NLGN1	Nrxn2,Nrxn1,Nrxn3	ligand-receptor	Synaptic adhesion molecule
NRXN1_NLGN1	ClusterNeural Stem	ClusterGABA_neurons	0.204218	NRXN1	NLGN1	Nrxn2,Nrxn1,Nrxn3	ligand-receptor	Synaptic adhesion molecule
NRXN1_NLGN1	ClusterOPCs	ClusterGABA_neurons	0.29166	NRXN1	NLGN1	Nrxn2,Nrxn1,Nrxn3	ligand-receptor	Synaptic adhesion molecule
NRXN1_NLGN1	ClustermGC	ClusterGABA_neurons	0.271297	NRXN1	NLGN1	Nrxn2,Nrxn1,Nrxn3	ligand-receptor	Synaptic adhesion molecule
NRXN1_NLGN1	ClusterAstrocytes	ClusterImmature	0.284989	NRXN1	NLGN1	Nrxn2,Nrxn1,Nrxn3	ligand-receptor	Synaptic adhesion molecule
NRXN1_NLGN1	ClusterCA2-4_neurons	ClusterImmature	0.267493	NRXN1	NLGN1	Nrxn2,Nrxn1,Nrxn3	ligand-receptor	Synaptic adhesion molecule
NRXN1_NLGN1	ClusterCA_neurons	ClusterImmature	0.276247	NRXN1	NLGN1	Nrxn2,Nrxn1,Nrxn3	ligand-receptor	Synaptic adhesion molecule
NRXN1_NLGN1	ClusterGABA_neurons	ClusterImmature	0.279486	NRXN1	NLGN1	Nrxn2,Nrxn1,Nrxn3	ligand-receptor	Synaptic adhesion molecule
NRXN1_NLGN1	ClusterImmature	ClusterImmature	0.281699	NRXN1	NLGN1	Nrxn2,Nrxn1,Nrxn3	ligand-receptor	Synaptic adhesion molecule
NRXN1_NLGN1	ClusterNeural Stem	ClusterImmature	0.21765	NRXN1	NLGN1	Nrxn2,Nrxn1,Nrxn3	ligand-receptor	Synaptic adhesion molecule
NRXN1_NLGN1	ClusterOPCs	ClusterImmature	0.310842	NRXN1	NLGN1	Nrxn2,Nrxn1,Nrxn3	ligand-receptor	Synaptic adhesion molecule
NRXN1_NLGN1	ClustermGC	ClusterImmature	0.28914	NRXN1	NLGN1	Nrxn2,Nrxn1,Nrxn3	ligand-receptor	Synaptic adhesion molecule
NRXN1_NLGN1	ClusterAstrocytes	ClusterNeuroblast	0.223051	NRXN1	NLGN1	Nrxn2,Nrxn1,Nrxn3	ligand-receptor	Synaptic adhesion molecule
NRXN1_NLGN1	ClusterCA2-4_neurons	ClusterNeuroblast	0.209358	NRXN1	NLGN1	Nrxn2,Nrxn1,Nrxn3	ligand-receptor	Synaptic adhesion molecule
NRXN1_NLGN1	ClusterCA_neurons	ClusterNeuroblast	0.216209	NRXN1	NLGN1	Nrxn2,Nrxn1,Nrxn3	ligand-receptor	Synaptic adhesion molecule
NRXN1_NLGN1	ClusterGABA_neurons	ClusterNeuroblast	0.218744	NRXN1	NLGN1	Nrxn2,Nrxn1,Nrxn3	ligand-receptor	Synaptic adhesion molecule
NRXN1_NLGN1	ClusterImmature	ClusterNeuroblast	0.220476	NRXN1	NLGN1	Nrxn2,Nrxn1,Nrxn3	ligand-receptor	Synaptic adhesion molecule
NRXN1_NLGN1	ClusterNeural Stem	ClusterNeuroblast	0.170347	NRXN1	NLGN1	Nrxn2,Nrxn1,Nrxn3	ligand-receptor	Synaptic adhesion molecule
NRXN1_NLGN1	ClusterOPCs	ClusterNeuroblast	0.243285	NRXN1	NLGN1	Nrxn2,Nrxn1,Nrxn3	ligand-receptor	Synaptic adhesion molecule
NRXN1_NLGN1	ClustermGC	ClusterNeuroblast	0.226299	NRXN1	NLGN1	Nrxn2,Nrxn1,Nrxn3	ligand-receptor	Synaptic adhesion molecule
NRXN1_NLGN1	ClusterAstrocytes	ClusterOPCs	0.351258	NRXN1	NLGN1	Nrxn2,Nrxn1,Nrxn3	ligand-receptor	Synaptic adhesion molecule
NRXN1_NLGN1	ClusterCA2-4_neurons	ClusterOPCs	0.329694	NRXN1	NLGN1	Nrxn2,Nrxn1,Nrxn3	ligand-receptor	Synaptic adhesion molecule
NRXN1_NLGN1	ClusterCA_neurons	ClusterOPCs	0.340483	NRXN1	NLGN1	Nrxn2,Nrxn1,Nrxn3	ligand-receptor	Synaptic adhesion molecule
NRXN1_NLGN1	ClusterEpendymal	ClusterOPCs	0.162084	NRXN1	NLGN1	Nrxn2,Nrxn1,Nrxn3	ligand-receptor	Synaptic adhesion molecule
NRXN1_NLGN1	ClusterGABA_neurons	ClusterOPCs	0.344475	NRXN1	NLGN1	Nrxn2,Nrxn1,Nrxn3	ligand-receptor	Synaptic adhesion molecule
NRXN1_NLGN1	ClusterImmature	ClusterOPCs	0.347203	NRXN1	NLGN1	Nrxn2,Nrxn1,Nrxn3	ligand-receptor	Synaptic adhesion molecule
NRXN1_NLGN1	ClusterNeural Stem	ClusterOPCs	0.26826	NRXN1	NLGN1	Nrxn2,Nrxn1,Nrxn3	ligand-receptor	Synaptic adhesion molecule
NRXN1_NLGN1	ClusterOPCs	ClusterOPCs	0.383122	NRXN1	NLGN1	Nrxn2,Nrxn1,Nrxn3	ligand-receptor	Synaptic adhesion molecule
NRXN1_NLGN1	ClustermGC	ClusterOPCs	0.356373	NRXN1	NLGN1	Nrxn2,Nrxn1,Nrxn3	ligand-receptor	Synaptic adhesion molecule
NRXN1_NLGN1	ClusterAstrocytes	ClustermGC	0.29816	NRXN1	NLGN1	Nrxn2,Nrxn1,Nrxn3	ligand-receptor	Synaptic adhesion molecule
NRXN1_NLGN1	ClusterCA2-4_neurons	ClustermGC	0.279856	NRXN1	NLGN1	Nrxn2,Nrxn1,Nrxn3	ligand-receptor	Synaptic adhesion molecule
NRXN1_NLGN1	ClusterCA_neurons	ClustermGC	0.289014	NRXN1	NLGN1	Nrxn2,Nrxn1,Nrxn3	ligand-receptor	Synaptic adhesion molecule
NRXN1_NLGN1	ClusterGABA_neurons	ClustermGC	0.292403	NRXN1	NLGN1	Nrxn2,Nrxn1,Nrxn3	ligand-receptor	Synaptic adhesion molecule
NRXN1_NLGN1	ClusterImmature	ClustermGC	0.294718	NRXN1	NLGN1	Nrxn2,Nrxn1,Nrxn3	ligand-receptor	Synaptic adhesion molecule
NRXN1_NLGN1	ClusterNeural Stem	ClustermGC	0.227709	NRXN1	NLGN1	Nrxn2,Nrxn1,Nrxn3	ligand-receptor	Synaptic adhesion molecule
NRXN1_NLGN1	ClusterOPCs	ClustermGC	0.325208	NRXN1	NLGN1	Nrxn2,Nrxn1,Nrxn3	ligand-receptor	Synaptic adhesion molecule
NRXN1_NLGN1	ClustermGC	ClustermGC	0.302502	NRXN1	NLGN1	Nrxn2,Nrxn1,Nrxn3	ligand-receptor	Synaptic adhesion molecule
NRXN1_NLGN1	ClusterAstrocytes	ClustermOli	0.244793	NRXN1	NLGN1	Nrxn2,Nrxn1,Nrxn3	ligand-receptor	Synaptic adhesion molecule
NRXN1_NLGN1	ClusterCA2-4_neurons	ClustermOli	0.229765	NRXN1	NLGN1	Nrxn2,Nrxn1,Nrxn3	ligand-receptor	Synaptic adhesion molecule
NRXN1_NLGN1	ClusterCA_neurons	ClustermOli	0.237284	NRXN1	NLGN1	Nrxn2,Nrxn1,Nrxn3	ligand-receptor	Synaptic adhesion molecule
NRXN1_NLGN1	ClusterGABA_neurons	ClustermOli	0.240066	NRXN1	NLGN1	Nrxn2,Nrxn1,Nrxn3	ligand-receptor	Synaptic adhesion molecule
NRXN1_NLGN1	ClusterImmature	ClustermOli	0.241968	NRXN1	NLGN1	Nrxn2,Nrxn1,Nrxn3	ligand-receptor	Synaptic adhesion molecule
NRXN1_NLGN1	ClusterNeural Stem	ClustermOli	0.186952	NRXN1	NLGN1	Nrxn2,Nrxn1,Nrxn3	ligand-receptor	Synaptic adhesion molecule
NRXN1_NLGN1	ClusterOPCs	ClustermOli	0.267	NRXN1	NLGN1	Nrxn2,Nrxn1,Nrxn3	ligand-receptor	Synaptic adhesion molecule
NRXN1_NLGN1	ClustermGC	ClustermOli	0.248358	NRXN1	NLGN1	Nrxn2,Nrxn1,Nrxn3	ligand-receptor	Synaptic adhesion molecule
NRXN1_NLGN2	ClusterAstrocytes	ClusterCA2.4_neurons	0.00330324	NRXN1	NLGN2		ligand-receptor	Synaptic adhesion molecule
NRXN1_NLGN2	ClusterCA2-4_neurons	ClusterCA2.4_neurons	0.00310045	NRXN1	NLGN2		ligand-receptor	Synaptic adhesion molecule
NRXN1_NLGN2	ClusterCA_neurons	ClusterCA2.4_neurons	0.00320191	NRXN1	NLGN2		ligand-receptor	Synaptic adhesion molecule
NRXN1_NLGN2	ClusterEndothelial	ClusterCA2.4_neurons	0.000174933	NRXN1	NLGN2		ligand-receptor	Synaptic adhesion molecule
NRXN1_NLGN2	ClusterEpendymal	ClusterCA2.4_neurons	0.00152424	NRXN1	NLGN2		ligand-receptor	Synaptic adhesion molecule
NRXN1_NLGN2	ClusterGABA_neurons	ClusterCA2.4_neurons	0.00323945	NRXN1	NLGN2		ligand-receptor	Synaptic adhesion molecule
NRXN1_NLGN2	ClusterImmature	ClusterCA2.4_neurons	0.00326511	NRXN1	NLGN2		ligand-receptor	Synaptic adhesion molecule
NRXN1_NLGN2	ClusterNeural Stem	ClusterCA2.4_neurons	0.00252272	NRXN1	NLGN2		ligand-receptor	Synaptic adhesion molecule
NRXN1_NLGN2	ClusterNeuroblast	ClusterCA2.4_neurons	0.000387511	NRXN1	NLGN2		ligand-receptor	Synaptic adhesion molecule
NRXN1_NLGN2	ClusterOPCs	ClusterCA2.4_neurons	0.00360289	NRXN1	NLGN2		ligand-receptor	Synaptic adhesion molecule
NRXN1_NLGN2	ClustermGC	ClusterCA2.4_neurons	0.00335134	NRXN1	NLGN2		ligand-receptor	Synaptic adhesion molecule
NRXN1_NLGN2	ClusterAstrocytes	ClusterCA_neurons	0.00407949	NRXN1	NLGN2		ligand-receptor	Synaptic adhesion molecule
NRXN1_NLGN2	ClusterCA2-4_neurons	ClusterCA_neurons	0.00382904	NRXN1	NLGN2		ligand-receptor	Synaptic adhesion molecule
NRXN1_NLGN2	ClusterCA_neurons	ClusterCA_neurons	0.00395435	NRXN1	NLGN2		ligand-receptor	Synaptic adhesion molecule
NRXN1_NLGN2	ClusterEndothelial	ClusterCA_neurons	0.000216041	NRXN1	NLGN2		ligand-receptor	Synaptic adhesion molecule
NRXN1_NLGN2	ClusterEpendymal	ClusterCA_neurons	0.00188243	NRXN1	NLGN2		ligand-receptor	Synaptic adhesion molecule
NRXN1_NLGN2	ClusterGABA_neurons	ClusterCA_neurons	0.00400071	NRXN1	NLGN2		ligand-receptor	Synaptic adhesion molecule
NRXN1_NLGN2	ClusterImmature	ClusterCA_neurons	0.00403239	NRXN1	NLGN2		ligand-receptor	Synaptic adhesion molecule
NRXN1_NLGN2	ClusterNeural Stem	ClusterCA_neurons	0.00311555	NRXN1	NLGN2		ligand-receptor	Synaptic adhesion molecule
NRXN1_NLGN2	ClusterNeuroblast	ClusterCA_neurons	0.000478574	NRXN1	NLGN2		ligand-receptor	Synaptic adhesion molecule
NRXN1_NLGN2	ClusterOPCs	ClusterCA_neurons	0.00444955	NRXN1	NLGN2		ligand-receptor	Synaptic adhesion molecule
NRXN1_NLGN2	ClustermGC	ClusterCA_neurons	0.0041389	NRXN1	NLGN2		ligand-receptor	Synaptic adhesion molecule
NRXN1_NLGN2	ClusterAstrocytes	ClusterImmature	0.00760348	NRXN1	NLGN2		ligand-receptor	Synaptic adhesion molecule
NRXN1_NLGN2	ClusterCA2-4_neurons	ClusterImmature	0.00713668	NRXN1	NLGN2		ligand-receptor	Synaptic adhesion molecule
NRXN1_NLGN2	ClusterCA_neurons	ClusterImmature	0.00737023	NRXN1	NLGN2		ligand-receptor	Synaptic adhesion molecule
NRXN1_NLGN2	ClusterEndothelial	ClusterImmature	0.000402664	NRXN1	NLGN2		ligand-receptor	Synaptic adhesion molecule
NRXN1_NLGN2	ClusterEpendymal	ClusterImmature	0.00350854	NRXN1	NLGN2		ligand-receptor	Synaptic adhesion molecule
NRXN1_NLGN2	ClusterGABA_neurons	ClusterImmature	0.00745665	NRXN1	NLGN2		ligand-receptor	Synaptic adhesion molecule
NRXN1_NLGN2	ClusterImmature	ClusterImmature	0.0075157	NRXN1	NLGN2		ligand-receptor	Synaptic adhesion molecule
NRXN1_NLGN2	ClusterNeural Stem	ClusterImmature	0.00580686	NRXN1	NLGN2		ligand-receptor	Synaptic adhesion molecule
NRXN1_NLGN2	ClusterNeuroblast	ClusterImmature	0.000891981	NRXN1	NLGN2		ligand-receptor	Synaptic adhesion molecule
NRXN1_NLGN2	ClusterOPCs	ClusterImmature	0.00829322	NRXN1	NLGN2		ligand-receptor	Synaptic adhesion molecule
NRXN1_NLGN2	ClustermGC	ClusterImmature	0.0077142	NRXN1	NLGN2		ligand-receptor	Synaptic adhesion molecule
NRXN1_NLGN3	ClusterAstrocytes	ClusterCA2.4_neurons	0.00311251	NRXN1	NLGN3		ligand-receptor	Synaptic adhesion molecule
NRXN1_NLGN3	ClusterCA2-4_neurons	ClusterCA2.4_neurons	0.00292143	NRXN1	NLGN3		ligand-receptor	Synaptic adhesion molecule
NRXN1_NLGN3	ClusterCA_neurons	ClusterCA2.4_neurons	0.00301703	NRXN1	NLGN3		ligand-receptor	Synaptic adhesion molecule
NRXN1_NLGN3	ClusterEndothelial	ClusterCA2.4_neurons	0.000164832	NRXN1	NLGN3		ligand-receptor	Synaptic adhesion molecule
NRXN1_NLGN3	ClusterEpendymal	ClusterCA2.4_neurons	0.00143623	NRXN1	NLGN3		ligand-receptor	Synaptic adhesion molecule
NRXN1_NLGN3	ClusterGABA_neurons	ClusterCA2.4_neurons	0.00305241	NRXN1	NLGN3		ligand-receptor	Synaptic adhesion molecule
NRXN1_NLGN3	ClusterImmature	ClusterCA2.4_neurons	0.00307658	NRXN1	NLGN3		ligand-receptor	Synaptic adhesion molecule
NRXN1_NLGN3	ClusterNeural Stem	ClusterCA2.4_neurons	0.00237706	NRXN1	NLGN3		ligand-receptor	Synaptic adhesion molecule
NRXN1_NLGN3	ClusterNeuroblast	ClusterCA2.4_neurons	0.000365136	NRXN1	NLGN3		ligand-receptor	Synaptic adhesion molecule
NRXN1_NLGN3	ClusterOPCs	ClusterCA2.4_neurons	0.00339486	NRXN1	NLGN3		ligand-receptor	Synaptic adhesion molecule
NRXN1_NLGN3	ClustermGC	ClusterCA2.4_neurons	0.00315784	NRXN1	NLGN3		ligand-receptor	Synaptic adhesion molecule
NRXN1_NLGN3	ClusterAstrocytes	ClusterImmature	0.00622124	NRXN1	NLGN3		ligand-receptor	Synaptic adhesion molecule
NRXN1_NLGN3	ClusterCA2-4_neurons	ClusterImmature	0.0058393	NRXN1	NLGN3		ligand-receptor	Synaptic adhesion molecule
NRXN1_NLGN3	ClusterCA_neurons	ClusterImmature	0.00603039	NRXN1	NLGN3		ligand-receptor	Synaptic adhesion molecule
NRXN1_NLGN3	ClusterEndothelial	ClusterImmature	0.000329464	NRXN1	NLGN3		ligand-receptor	Synaptic adhesion molecule
NRXN1_NLGN3	ClusterEpendymal	ClusterImmature	0.00287072	NRXN1	NLGN3		ligand-receptor	Synaptic adhesion molecule
NRXN1_NLGN3	ClusterGABA_neurons	ClusterImmature	0.0061011	NRXN1	NLGN3		ligand-receptor	Synaptic adhesion molecule
NRXN1_NLGN3	ClusterImmature	ClusterImmature	0.00614942	NRXN1	NLGN3		ligand-receptor	Synaptic adhesion molecule
NRXN1_NLGN3	ClusterNeural Stem	ClusterImmature	0.00475123	NRXN1	NLGN3		ligand-receptor	Synaptic adhesion molecule
NRXN1_NLGN3	ClusterNeuroblast	ClusterImmature	0.000729827	NRXN1	NLGN3		ligand-receptor	Synaptic adhesion molecule
NRXN1_NLGN3	ClusterOPCs	ClusterImmature	0.00678559	NRXN1	NLGN3		ligand-receptor	Synaptic adhesion molecule
NRXN1_NLGN3	ClustermGC	ClusterImmature	0.00631183	NRXN1	NLGN3		ligand-receptor	Synaptic adhesion molecule
NRXN1_NLGN3	ClusterAstrocytes	ClusterOPCs	0.0162664	NRXN1	NLGN3		ligand-receptor	Synaptic adhesion molecule
NRXN1_NLGN3	ClusterCA2-4_neurons	ClusterOPCs	0.0152678	NRXN1	NLGN3		ligand-receptor	Synaptic adhesion molecule
NRXN1_NLGN3	ClusterCA_neurons	ClusterOPCs	0.0157675	NRXN1	NLGN3		ligand-receptor	Synaptic adhesion molecule
NRXN1_NLGN3	ClusterEndothelial	ClusterOPCs	0.000861437	NRXN1	NLGN3		ligand-receptor	Synaptic adhesion molecule
NRXN1_NLGN3	ClusterEpendymal	ClusterOPCs	0.00750597	NRXN1	NLGN3		ligand-receptor	Synaptic adhesion molecule
NRXN1_NLGN3	ClusterGABA_neurons	ClusterOPCs	0.0159523	NRXN1	NLGN3		ligand-receptor	Synaptic adhesion molecule
NRXN1_NLGN3	ClusterImmature	ClusterOPCs	0.0160787	NRXN1	NLGN3		ligand-receptor	Synaptic adhesion molecule
NRXN1_NLGN3	ClusterNeural Stem	ClusterOPCs	0.0124229	NRXN1	NLGN3		ligand-receptor	Synaptic adhesion molecule
NRXN1_NLGN3	ClusterNeuroblast	ClusterOPCs	0.00190825	NRXN1	NLGN3		ligand-receptor	Synaptic adhesion molecule
NRXN1_NLGN3	ClusterOPCs	ClusterOPCs	0.017742	NRXN1	NLGN3		ligand-receptor	Synaptic adhesion molecule
NRXN1_NLGN3	ClustermGC	ClusterOPCs	0.0165033	NRXN1	NLGN3		ligand-receptor	Synaptic adhesion molecule
NRXN1_NLGN4X	ClusterAstrocytes	ClusterCA2.4_neurons	0.0826721	NRXN1	NLGN4X		ligand-receptor	Synaptic adhesion molecule
NRXN1_NLGN4X	ClusterCA2-4_neurons	ClusterCA2.4_neurons	0.0775967	NRXN1	NLGN4X		ligand-receptor	Synaptic adhesion molecule
NRXN1_NLGN4X	ClusterCA_neurons	ClusterCA2.4_neurons	0.080136	NRXN1	NLGN4X		ligand-receptor	Synaptic adhesion molecule
NRXN1_NLGN4X	ClusterGABA_neurons	ClusterCA2.4_neurons	0.0810756	NRXN1	NLGN4X		ligand-receptor	Synaptic adhesion molecule
NRXN1_NLGN4X	ClusterImmature	ClusterCA2.4_neurons	0.0817177	NRXN1	NLGN4X		ligand-receptor	Synaptic adhesion molecule
NRXN1_NLGN4X	ClusterNeural Stem	ClusterCA2.4_neurons	0.0631376	NRXN1	NLGN4X		ligand-receptor	Synaptic adhesion molecule
NRXN1_NLGN4X	ClusterOPCs	ClusterCA2.4_neurons	0.0901716	NRXN1	NLGN4X		ligand-receptor	Synaptic adhesion molecule
NRXN1_NLGN4X	ClustermGC	ClusterCA2.4_neurons	0.083876	NRXN1	NLGN4X		ligand-receptor	Synaptic adhesion molecule
NRXN1_NLGN4X	ClusterAstrocytes	ClusterCA_neurons	0.0973672	NRXN1	NLGN4X		ligand-receptor	Synaptic adhesion molecule
NRXN1_NLGN4X	ClusterCA2-4_neurons	ClusterCA_neurons	0.0913896	NRXN1	NLGN4X		ligand-receptor	Synaptic adhesion molecule
NRXN1_NLGN4X	ClusterCA_neurons	ClusterCA_neurons	0.0943803	NRXN1	NLGN4X		ligand-receptor	Synaptic adhesion molecule
NRXN1_NLGN4X	ClusterEpendymal	ClusterCA_neurons	0.044929	NRXN1	NLGN4X		ligand-receptor	Synaptic adhesion molecule
NRXN1_NLGN4X	ClusterGABA_neurons	ClusterCA_neurons	0.0954869	NRXN1	NLGN4X		ligand-receptor	Synaptic adhesion molecule
NRXN1_NLGN4X	ClusterImmature	ClusterCA_neurons	0.0962431	NRXN1	NLGN4X		ligand-receptor	Synaptic adhesion molecule
NRXN1_NLGN4X	ClusterNeural Stem	ClusterCA_neurons	0.0743604	NRXN1	NLGN4X		ligand-receptor	Synaptic adhesion molecule
NRXN1_NLGN4X	ClusterOPCs	ClusterCA_neurons	0.1062	NRXN1	NLGN4X		ligand-receptor	Synaptic adhesion molecule
NRXN1_NLGN4X	ClustermGC	ClusterCA_neurons	0.0987851	NRXN1	NLGN4X		ligand-receptor	Synaptic adhesion molecule
NRXN1_NLGN4X	ClusterAstrocytes	ClusterGABA_neurons	0.101386	NRXN1	NLGN4X		ligand-receptor	Synaptic adhesion molecule
NRXN1_NLGN4X	ClusterCA2-4_neurons	ClusterGABA_neurons	0.0951621	NRXN1	NLGN4X		ligand-receptor	Synaptic adhesion molecule
NRXN1_NLGN4X	ClusterCA_neurons	ClusterGABA_neurons	0.0982763	NRXN1	NLGN4X		ligand-receptor	Synaptic adhesion molecule
NRXN1_NLGN4X	ClusterEpendymal	ClusterGABA_neurons	0.0467836	NRXN1	NLGN4X		ligand-receptor	Synaptic adhesion molecule
NRXN1_NLGN4X	ClusterGABA_neurons	ClusterGABA_neurons	0.0994286	NRXN1	NLGN4X		ligand-receptor	Synaptic adhesion molecule
NRXN1_NLGN4X	ClusterImmature	ClusterGABA_neurons	0.100216	NRXN1	NLGN4X		ligand-receptor	Synaptic adhesion molecule
NRXN1_NLGN4X	ClusterNeural Stem	ClusterGABA_neurons	0.07743	NRXN1	NLGN4X		ligand-receptor	Synaptic adhesion molecule
NRXN1_NLGN4X	ClusterOPCs	ClusterGABA_neurons	0.110584	NRXN1	NLGN4X		ligand-receptor	Synaptic adhesion molecule
NRXN1_NLGN4X	ClustermGC	ClusterGABA_neurons	0.102863	NRXN1	NLGN4X		ligand-receptor	Synaptic adhesion molecule
NRXN1_NLGN4X	ClusterAstrocytes	ClusterImmature	0.146924	NRXN1	NLGN4X		ligand-receptor	Synaptic adhesion molecule
NRXN1_NLGN4X	ClusterCA2-4_neurons	ClusterImmature	0.137904	NRXN1	NLGN4X		ligand-receptor	Synaptic adhesion molecule
NRXN1_NLGN4X	ClusterCA_neurons	ClusterImmature	0.142417	NRXN1	NLGN4X		ligand-receptor	Synaptic adhesion molecule
NRXN1_NLGN4X	ClusterEpendymal	ClusterImmature	0.0677966	NRXN1	NLGN4X		ligand-receptor	Synaptic adhesion molecule
NRXN1_NLGN4X	ClusterGABA_neurons	ClusterImmature	0.144087	NRXN1	NLGN4X		ligand-receptor	Synaptic adhesion molecule
NRXN1_NLGN4X	ClusterImmature	ClusterImmature	0.145228	NRXN1	NLGN4X		ligand-receptor	Synaptic adhesion molecule
NRXN1_NLGN4X	ClusterNeural Stem	ClusterImmature	0.112208	NRXN1	NLGN4X		ligand-receptor	Synaptic adhesion molecule
NRXN1_NLGN4X	ClusterOPCs	ClusterImmature	0.160253	NRXN1	NLGN4X		ligand-receptor	Synaptic adhesion molecule
NRXN1_NLGN4X	ClustermGC	ClusterImmature	0.149064	NRXN1	NLGN4X		ligand-receptor	Synaptic adhesion molecule
NRXN1_NLGN4X	ClusterAstrocytes	ClusterOPCs	0.180904	NRXN1	NLGN4X		ligand-receptor	Synaptic adhesion molecule
NRXN1_NLGN4X	ClusterCA2-4_neurons	ClusterOPCs	0.169798	NRXN1	NLGN4X		ligand-receptor	Synaptic adhesion molecule
NRXN1_NLGN4X	ClusterCA_neurons	ClusterOPCs	0.175355	NRXN1	NLGN4X		ligand-receptor	Synaptic adhesion molecule
NRXN1_NLGN4X	ClusterEpendymal	ClusterOPCs	0.0834762	NRXN1	NLGN4X		ligand-receptor	Synaptic adhesion molecule
NRXN1_NLGN4X	ClusterGABA_neurons	ClusterOPCs	0.177411	NRXN1	NLGN4X		ligand-receptor	Synaptic adhesion molecule
NRXN1_NLGN4X	ClusterImmature	ClusterOPCs	0.178816	NRXN1	NLGN4X		ligand-receptor	Synaptic adhesion molecule
NRXN1_NLGN4X	ClusterNeural Stem	ClusterOPCs	0.138159	NRXN1	NLGN4X		ligand-receptor	Synaptic adhesion molecule
NRXN1_NLGN4X	ClusterOPCs	ClusterOPCs	0.197315	NRXN1	NLGN4X		ligand-receptor	Synaptic adhesion molecule
NRXN1_NLGN4X	ClustermGC	ClusterOPCs	0.183539	NRXN1	NLGN4X		ligand-receptor	Synaptic adhesion molecule
NRXN1_NLGN4X	ClusterAstrocytes	ClustermGC	0.149185	NRXN1	NLGN4X		ligand-receptor	Synaptic adhesion molecule
NRXN1_NLGN4X	ClusterCA2-4_neurons	ClustermGC	0.140026	NRXN1	NLGN4X		ligand-receptor	Synaptic adhesion molecule
NRXN1_NLGN4X	ClusterCA_neurons	ClustermGC	0.144608	NRXN1	NLGN4X		ligand-receptor	Synaptic adhesion molecule
NRXN1_NLGN4X	ClusterEpendymal	ClustermGC	0.0688396	NRXN1	NLGN4X		ligand-receptor	Synaptic adhesion molecule
NRXN1_NLGN4X	ClusterGABA_neurons	ClustermGC	0.146304	NRXN1	NLGN4X		ligand-receptor	Synaptic adhesion molecule
NRXN1_NLGN4X	ClusterImmature	ClustermGC	0.147463	NRXN1	NLGN4X		ligand-receptor	Synaptic adhesion molecule
NRXN1_NLGN4X	ClusterNeural Stem	ClustermGC	0.113934	NRXN1	NLGN4X		ligand-receptor	Synaptic adhesion molecule
NRXN1_NLGN4X	ClusterOPCs	ClustermGC	0.162718	NRXN1	NLGN4X		ligand-receptor	Synaptic adhesion molecule
NRXN1_NLGN4X	ClustermGC	ClustermGC	0.151357	NRXN1	NLGN4X		ligand-receptor	Synaptic adhesion molecule
NRXN1_NLGN4Y	ClusterAstrocytes	ClusterCA_neurons	0.131235	NRXN1	NLGN4Y		ligand-receptor	Synaptic adhesion molecule
NRXN1_NLGN4Y	ClusterCA2-4_neurons	ClusterCA_neurons	0.123179	NRXN1	NLGN4Y		ligand-receptor	Synaptic adhesion molecule
NRXN1_NLGN4Y	ClusterCA_neurons	ClusterCA_neurons	0.12721	NRXN1	NLGN4Y		ligand-receptor	Synaptic adhesion molecule
NRXN1_NLGN4Y	ClusterEpendymal	ClusterCA_neurons	0.0605571	NRXN1	NLGN4Y		ligand-receptor	Synaptic adhesion molecule
NRXN1_NLGN4Y	ClusterGABA_neurons	ClusterCA_neurons	0.128701	NRXN1	NLGN4Y		ligand-receptor	Synaptic adhesion molecule
NRXN1_NLGN4Y	ClusterImmature	ClusterCA_neurons	0.12972	NRXN1	NLGN4Y		ligand-receptor	Synaptic adhesion molecule
NRXN1_NLGN4Y	ClusterNeural Stem	ClusterCA_neurons	0.100226	NRXN1	NLGN4Y		ligand-receptor	Synaptic adhesion molecule
NRXN1_NLGN4Y	ClusterOPCs	ClusterCA_neurons	0.14314	NRXN1	NLGN4Y		ligand-receptor	Synaptic adhesion molecule
NRXN1_NLGN4Y	ClustermGC	ClusterCA_neurons	0.133146	NRXN1	NLGN4Y		ligand-receptor	Synaptic adhesion molecule
NRXN1_NLGN4Y	ClusterAstrocytes	ClusterGABA_neurons	0.109166	NRXN1	NLGN4Y		ligand-receptor	Synaptic adhesion molecule
NRXN1_NLGN4Y	ClusterCA2-4_neurons	ClusterGABA_neurons	0.102464	NRXN1	NLGN4Y		ligand-receptor	Synaptic adhesion molecule
NRXN1_NLGN4Y	ClusterCA_neurons	ClusterGABA_neurons	0.105817	NRXN1	NLGN4Y		ligand-receptor	Synaptic adhesion molecule
NRXN1_NLGN4Y	ClusterGABA_neurons	ClusterGABA_neurons	0.107058	NRXN1	NLGN4Y		ligand-receptor	Synaptic adhesion molecule
NRXN1_NLGN4Y	ClusterImmature	ClusterGABA_neurons	0.107906	NRXN1	NLGN4Y		ligand-receptor	Synaptic adhesion molecule
NRXN1_NLGN4Y	ClusterNeural Stem	ClusterGABA_neurons	0.0833714	NRXN1	NLGN4Y		ligand-receptor	Synaptic adhesion molecule
NRXN1_NLGN4Y	ClusterOPCs	ClusterGABA_neurons	0.119069	NRXN1	NLGN4Y		ligand-receptor	Synaptic adhesion molecule
NRXN1_NLGN4Y	ClustermGC	ClusterGABA_neurons	0.110756	NRXN1	NLGN4Y		ligand-receptor	Synaptic adhesion molecule
NRXN1_NLGN4Y	ClusterAstrocytes	ClusterImmature	0.128823	NRXN1	NLGN4Y		ligand-receptor	Synaptic adhesion molecule
NRXN1_NLGN4Y	ClusterCA2-4_neurons	ClusterImmature	0.120914	NRXN1	NLGN4Y		ligand-receptor	Synaptic adhesion molecule
NRXN1_NLGN4Y	ClusterCA_neurons	ClusterImmature	0.124871	NRXN1	NLGN4Y		ligand-receptor	Synaptic adhesion molecule
NRXN1_NLGN4Y	ClusterEpendymal	ClusterImmature	0.0594439	NRXN1	NLGN4Y		ligand-receptor	Synaptic adhesion molecule
NRXN1_NLGN4Y	ClusterGABA_neurons	ClusterImmature	0.126335	NRXN1	NLGN4Y		ligand-receptor	Synaptic adhesion molecule
NRXN1_NLGN4Y	ClusterImmature	ClusterImmature	0.127336	NRXN1	NLGN4Y		ligand-receptor	Synaptic adhesion molecule
NRXN1_NLGN4Y	ClusterNeural Stem	ClusterImmature	0.0983836	NRXN1	NLGN4Y		ligand-receptor	Synaptic adhesion molecule
NRXN1_NLGN4Y	ClusterOPCs	ClusterImmature	0.140509	NRXN1	NLGN4Y		ligand-receptor	Synaptic adhesion molecule
NRXN1_NLGN4Y	ClustermGC	ClusterImmature	0.130699	NRXN1	NLGN4Y		ligand-receptor	Synaptic adhesion molecule
NRXN1_NLGN4Y	ClusterAstrocytes	ClusterOPCs	0.146544	NRXN1	NLGN4Y		ligand-receptor	Synaptic adhesion molecule
NRXN1_NLGN4Y	ClusterCA2-4_neurons	ClusterOPCs	0.137547	NRXN1	NLGN4Y		ligand-receptor	Synaptic adhesion molecule
NRXN1_NLGN4Y	ClusterCA_neurons	ClusterOPCs	0.142049	NRXN1	NLGN4Y		ligand-receptor	Synaptic adhesion molecule
NRXN1_NLGN4Y	ClusterEpendymal	ClusterOPCs	0.0676211	NRXN1	NLGN4Y		ligand-receptor	Synaptic adhesion molecule
NRXN1_NLGN4Y	ClusterGABA_neurons	ClusterOPCs	0.143714	NRXN1	NLGN4Y		ligand-receptor	Synaptic adhesion molecule
NRXN1_NLGN4Y	ClusterImmature	ClusterOPCs	0.144852	NRXN1	NLGN4Y		ligand-receptor	Synaptic adhesion molecule
NRXN1_NLGN4Y	ClusterNeural Stem	ClusterOPCs	0.111917	NRXN1	NLGN4Y		ligand-receptor	Synaptic adhesion molecule
NRXN1_NLGN4Y	ClusterOPCs	ClusterOPCs	0.159838	NRXN1	NLGN4Y		ligand-receptor	Synaptic adhesion molecule
NRXN1_NLGN4Y	ClustermGC	ClusterOPCs	0.148678	NRXN1	NLGN4Y		ligand-receptor	Synaptic adhesion molecule
NRXN1_NLGN4Y	ClusterAstrocytes	ClustermGC	0.101134	NRXN1	NLGN4Y		ligand-receptor	Synaptic adhesion molecule
NRXN1_NLGN4Y	ClusterCA2-4_neurons	ClustermGC	0.0949252	NRXN1	NLGN4Y		ligand-receptor	Synaptic adhesion molecule
NRXN1_NLGN4Y	ClusterCA_neurons	ClustermGC	0.0980316	NRXN1	NLGN4Y		ligand-receptor	Synaptic adhesion molecule
NRXN1_NLGN4Y	ClusterGABA_neurons	ClustermGC	0.099181	NRXN1	NLGN4Y		ligand-receptor	Synaptic adhesion molecule
NRXN1_NLGN4Y	ClusterImmature	ClustermGC	0.0999665	NRXN1	NLGN4Y		ligand-receptor	Synaptic adhesion molecule
NRXN1_NLGN4Y	ClusterNeural Stem	ClustermGC	0.0772372	NRXN1	NLGN4Y		ligand-receptor	Synaptic adhesion molecule
NRXN1_NLGN4Y	ClusterOPCs	ClustermGC	0.110308	NRXN1	NLGN4Y		ligand-receptor	Synaptic adhesion molecule
NRXN1_NLGN4Y	ClustermGC	ClustermGC	0.102607	NRXN1	NLGN4Y		ligand-receptor	Synaptic adhesion molecule
NRXN2_NLGN1	ClusterCA2-4_neurons	ClusterCA2.4_neurons	0.0188529	NRXN2	NLGN1		ligand-receptor	Synaptic adhesion molecule
NRXN2_NLGN1	ClusterCA_neurons	ClusterCA2.4_neurons	0.0279874	NRXN2	NLGN1		ligand-receptor	Synaptic adhesion molecule
NRXN2_NLGN1	ClusterGABA_neurons	ClusterCA2.4_neurons	0.0381063	NRXN2	NLGN1		ligand-receptor	Synaptic adhesion molecule
NRXN2_NLGN1	ClusterImmature	ClusterCA2.4_neurons	0.0337987	NRXN2	NLGN1		ligand-receptor	Synaptic adhesion molecule
NRXN2_NLGN1	ClusterOPCs	ClusterCA2.4_neurons	0.0183117	NRXN2	NLGN1		ligand-receptor	Synaptic adhesion molecule
NRXN2_NLGN1	ClustermGC	ClusterCA2.4_neurons	0.0112979	NRXN2	NLGN1		ligand-receptor	Synaptic adhesion molecule
NRXN2_NLGN1	ClusterCA2-4_neurons	ClusterCA_neurons	0.0162923	NRXN2	NLGN1		ligand-receptor	Synaptic adhesion molecule
NRXN2_NLGN1	ClusterCA_neurons	ClusterCA_neurons	0.0241862	NRXN2	NLGN1		ligand-receptor	Synaptic adhesion molecule
NRXN2_NLGN1	ClusterGABA_neurons	ClusterCA_neurons	0.0329307	NRXN2	NLGN1		ligand-receptor	Synaptic adhesion molecule
NRXN2_NLGN1	ClusterImmature	ClusterCA_neurons	0.0292081	NRXN2	NLGN1		ligand-receptor	Synaptic adhesion molecule
NRXN2_NLGN1	ClusterOPCs	ClusterCA_neurons	0.0158246	NRXN2	NLGN1		ligand-receptor	Synaptic adhesion molecule
NRXN2_NLGN1	ClustermGC	ClusterCA_neurons	0.00976342	NRXN2	NLGN1		ligand-receptor	Synaptic adhesion molecule
NRXN2_NLGN1	ClusterCA2-4_neurons	ClusterEpendymal	0.00883609	NRXN2	NLGN1		ligand-receptor	Synaptic adhesion molecule
NRXN2_NLGN1	ClusterCA_neurons	ClusterEpendymal	0.0131173	NRXN2	NLGN1		ligand-receptor	Synaptic adhesion molecule
NRXN2_NLGN1	ClusterGABA_neurons	ClusterEpendymal	0.0178599	NRXN2	NLGN1		ligand-receptor	Synaptic adhesion molecule
NRXN2_NLGN1	ClusterImmature	ClusterEpendymal	0.0158409	NRXN2	NLGN1		ligand-receptor	Synaptic adhesion molecule
NRXN2_NLGN1	ClusterOPCs	ClusterEpendymal	0.00858244	NRXN2	NLGN1		ligand-receptor	Synaptic adhesion molecule
NRXN2_NLGN1	ClustermGC	ClusterEpendymal	0.00529516	NRXN2	NLGN1		ligand-receptor	Synaptic adhesion molecule
NRXN2_NLGN1	ClusterCA2-4_neurons	ClusterGABA_neurons	0.0157994	NRXN2	NLGN1		ligand-receptor	Synaptic adhesion molecule
NRXN2_NLGN1	ClusterCA_neurons	ClusterGABA_neurons	0.0234544	NRXN2	NLGN1		ligand-receptor	Synaptic adhesion molecule
NRXN2_NLGN1	ClusterGABA_neurons	ClusterGABA_neurons	0.0319343	NRXN2	NLGN1		ligand-receptor	Synaptic adhesion molecule
NRXN2_NLGN1	ClusterImmature	ClusterGABA_neurons	0.0283243	NRXN2	NLGN1		ligand-receptor	Synaptic adhesion molecule
NRXN2_NLGN1	ClusterOPCs	ClusterGABA_neurons	0.0153458	NRXN2	NLGN1		ligand-receptor	Synaptic adhesion molecule
NRXN2_NLGN1	ClustermGC	ClusterGABA_neurons	0.00946801	NRXN2	NLGN1		ligand-receptor	Synaptic adhesion molecule
NRXN2_NLGN1	ClusterCA2-4_neurons	ClusterImmature	0.0168385	NRXN2	NLGN1		ligand-receptor	Synaptic adhesion molecule
NRXN2_NLGN1	ClusterCA_neurons	ClusterImmature	0.0249969	NRXN2	NLGN1		ligand-receptor	Synaptic adhesion molecule
NRXN2_NLGN1	ClusterGABA_neurons	ClusterImmature	0.0340346	NRXN2	NLGN1		ligand-receptor	Synaptic adhesion molecule
NRXN2_NLGN1	ClusterImmature	ClusterImmature	0.0301872	NRXN2	NLGN1		ligand-receptor	Synaptic adhesion molecule
NRXN2_NLGN1	ClusterOPCs	ClusterImmature	0.0163551	NRXN2	NLGN1		ligand-receptor	Synaptic adhesion molecule
NRXN2_NLGN1	ClustermGC	ClusterImmature	0.0100907	NRXN2	NLGN1		ligand-receptor	Synaptic adhesion molecule
NRXN2_NLGN1	ClusterCA2-4_neurons	ClusterNeuroblast	0.0131789	NRXN2	NLGN1		ligand-receptor	Synaptic adhesion molecule
NRXN2_NLGN1	ClusterCA_neurons	ClusterNeuroblast	0.0195642	NRXN2	NLGN1		ligand-receptor	Synaptic adhesion molecule
NRXN2_NLGN1	ClusterGABA_neurons	ClusterNeuroblast	0.0266377	NRXN2	NLGN1		ligand-receptor	Synaptic adhesion molecule
NRXN2_NLGN1	ClusterImmature	ClusterNeuroblast	0.0236265	NRXN2	NLGN1		ligand-receptor	Synaptic adhesion molecule
NRXN2_NLGN1	ClusterOPCs	ClusterNeuroblast	0.0128006	NRXN2	NLGN1		ligand-receptor	Synaptic adhesion molecule
NRXN2_NLGN1	ClustermGC	ClusterNeuroblast	0.00789765	NRXN2	NLGN1		ligand-receptor	Synaptic adhesion molecule
NRXN2_NLGN1	ClusterCA2-4_neurons	ClusterOPCs	0.0207539	NRXN2	NLGN1		ligand-receptor	Synaptic adhesion molecule
NRXN2_NLGN1	ClusterCA_neurons	ClusterOPCs	0.0308095	NRXN2	NLGN1		ligand-receptor	Synaptic adhesion molecule
NRXN2_NLGN1	ClusterGABA_neurons	ClusterOPCs	0.0419487	NRXN2	NLGN1		ligand-receptor	Synaptic adhesion molecule
NRXN2_NLGN1	ClusterImmature	ClusterOPCs	0.0372067	NRXN2	NLGN1		ligand-receptor	Synaptic adhesion molecule
NRXN2_NLGN1	ClusterOPCs	ClusterOPCs	0.0201582	NRXN2	NLGN1		ligand-receptor	Synaptic adhesion molecule
NRXN2_NLGN1	ClustermGC	ClusterOPCs	0.0124371	NRXN2	NLGN1		ligand-receptor	Synaptic adhesion molecule
NRXN2_NLGN1	ClusterCA2-4_neurons	ClustermGC	0.0176167	NRXN2	NLGN1		ligand-receptor	Synaptic adhesion molecule
NRXN2_NLGN1	ClusterCA_neurons	ClustermGC	0.0261522	NRXN2	NLGN1		ligand-receptor	Synaptic adhesion molecule
NRXN2_NLGN1	ClusterGABA_neurons	ClustermGC	0.0356075	NRXN2	NLGN1		ligand-receptor	Synaptic adhesion molecule
NRXN2_NLGN1	ClusterImmature	ClustermGC	0.0315823	NRXN2	NLGN1		ligand-receptor	Synaptic adhesion molecule
NRXN2_NLGN1	ClusterOPCs	ClustermGC	0.017111	NRXN2	NLGN1		ligand-receptor	Synaptic adhesion molecule
NRXN2_NLGN1	ClustermGC	ClustermGC	0.0105571	NRXN2	NLGN1		ligand-receptor	Synaptic adhesion molecule
NRXN2_NLGN1	ClusterCA2-4_neurons	ClustermOli	0.0144635	NRXN2	NLGN1		ligand-receptor	Synaptic adhesion molecule
NRXN2_NLGN1	ClusterCA_neurons	ClustermOli	0.0214713	NRXN2	NLGN1		ligand-receptor	Synaptic adhesion molecule
NRXN2_NLGN1	ClusterGABA_neurons	ClustermOli	0.0292342	NRXN2	NLGN1		ligand-receptor	Synaptic adhesion molecule
NRXN2_NLGN1	ClusterImmature	ClustermOli	0.0259295	NRXN2	NLGN1		ligand-receptor	Synaptic adhesion molecule
NRXN2_NLGN1	ClusterOPCs	ClustermOli	0.0140483	NRXN2	NLGN1		ligand-receptor	Synaptic adhesion molecule
NRXN2_NLGN1	ClustermGC	ClustermOli	0.00866748	NRXN2	NLGN1		ligand-receptor	Synaptic adhesion molecule
NRXN2_NLGN2	ClusterCA2-4_neurons	ClusterCA2.4_neurons	0.00019517	NRXN2	NLGN2	Nrxn2,Nrxn1,Nrxn3,Gphn	ligand-receptor	Synaptic adhesion molecule
NRXN2_NLGN2	ClusterCA_neurons	ClusterCA2.4_neurons	0.000289733	NRXN2	NLGN2	Nrxn2,Nrxn1,Nrxn3,Gphn	ligand-receptor	Synaptic adhesion molecule
NRXN2_NLGN2	ClusterGABA_neurons	ClusterCA2.4_neurons	0.000394486	NRXN2	NLGN2	Nrxn2,Nrxn1,Nrxn3,Gphn	ligand-receptor	Synaptic adhesion molecule
NRXN2_NLGN2	ClusterImmature	ClusterCA2.4_neurons	0.000349892	NRXN2	NLGN2	Nrxn2,Nrxn1,Nrxn3,Gphn	ligand-receptor	Synaptic adhesion molecule
NRXN2_NLGN2	ClusterOPCs	ClusterCA2.4_neurons	0.000189568	NRXN2	NLGN2	Nrxn2,Nrxn1,Nrxn3,Gphn	ligand-receptor	Synaptic adhesion molecule
NRXN2_NLGN2	ClustermGC	ClusterCA2.4_neurons	0.000116959	NRXN2	NLGN2	Nrxn2,Nrxn1,Nrxn3,Gphn	ligand-receptor	Synaptic adhesion molecule
NRXN2_NLGN2	ClusterCA2-4_neurons	ClusterCA_neurons	0.000241035	NRXN2	NLGN2	Nrxn2,Nrxn1,Nrxn3,Gphn	ligand-receptor	Synaptic adhesion molecule
NRXN2_NLGN2	ClusterCA_neurons	ClusterCA_neurons	0.000357819	NRXN2	NLGN2	Nrxn2,Nrxn1,Nrxn3,Gphn	ligand-receptor	Synaptic adhesion molecule
NRXN2_NLGN2	ClusterGABA_neurons	ClusterCA_neurons	0.000487189	NRXN2	NLGN2	Nrxn2,Nrxn1,Nrxn3,Gphn	ligand-receptor	Synaptic adhesion molecule
NRXN2_NLGN2	ClusterImmature	ClusterCA_neurons	0.000432116	NRXN2	NLGN2	Nrxn2,Nrxn1,Nrxn3,Gphn	ligand-receptor	Synaptic adhesion molecule
NRXN2_NLGN2	ClusterOPCs	ClusterCA_neurons	0.000234115	NRXN2	NLGN2	Nrxn2,Nrxn1,Nrxn3,Gphn	ligand-receptor	Synaptic adhesion molecule
NRXN2_NLGN2	ClustermGC	ClusterCA_neurons	0.000144444	NRXN2	NLGN2	Nrxn2,Nrxn1,Nrxn3,Gphn	ligand-receptor	Synaptic adhesion molecule
NRXN2_NLGN2	ClusterCA2-4_neurons	ClusterImmature	0.000449248	NRXN2	NLGN2	Nrxn2,Nrxn1,Nrxn3,Gphn	ligand-receptor	Synaptic adhesion molecule
NRXN2_NLGN2	ClusterCA_neurons	ClusterImmature	0.000666915	NRXN2	NLGN2	Nrxn2,Nrxn1,Nrxn3,Gphn	ligand-receptor	Synaptic adhesion molecule
NRXN2_NLGN2	ClusterGABA_neurons	ClusterImmature	0.000908038	NRXN2	NLGN2	Nrxn2,Nrxn1,Nrxn3,Gphn	ligand-receptor	Synaptic adhesion molecule
NRXN2_NLGN2	ClusterImmature	ClusterImmature	0.000805391	NRXN2	NLGN2	Nrxn2,Nrxn1,Nrxn3,Gphn	ligand-receptor	Synaptic adhesion molecule
NRXN2_NLGN2	ClusterOPCs	ClusterImmature	0.000436352	NRXN2	NLGN2	Nrxn2,Nrxn1,Nrxn3,Gphn	ligand-receptor	Synaptic adhesion molecule
NRXN2_NLGN2	ClustermGC	ClusterImmature	0.000269219	NRXN2	NLGN2	Nrxn2,Nrxn1,Nrxn3,Gphn	ligand-receptor	Synaptic adhesion molecule
NRXN2_NLGN3	ClusterCA2-4_neurons	ClusterCA2.4_neurons	0.000183901	NRXN2	NLGN3		ligand-receptor	Synaptic adhesion molecule
NRXN2_NLGN3	ClusterCA_neurons	ClusterCA2.4_neurons	0.000273004	NRXN2	NLGN3		ligand-receptor	Synaptic adhesion molecule
NRXN2_NLGN3	ClusterGABA_neurons	ClusterCA2.4_neurons	0.000371709	NRXN2	NLGN3		ligand-receptor	Synaptic adhesion molecule
NRXN2_NLGN3	ClusterImmature	ClusterCA2.4_neurons	0.00032969	NRXN2	NLGN3		ligand-receptor	Synaptic adhesion molecule
NRXN2_NLGN3	ClusterOPCs	ClusterCA2.4_neurons	0.000178622	NRXN2	NLGN3		ligand-receptor	Synaptic adhesion molecule
NRXN2_NLGN3	ClustermGC	ClusterCA2.4_neurons	0.000110206	NRXN2	NLGN3		ligand-receptor	Synaptic adhesion molecule
NRXN2_NLGN3	ClusterCA2-4_neurons	ClusterImmature	0.000367579	NRXN2	NLGN3		ligand-receptor	Synaptic adhesion molecule
NRXN2_NLGN3	ClusterCA_neurons	ClusterImmature	0.000545676	NRXN2	NLGN3		ligand-receptor	Synaptic adhesion molecule
NRXN2_NLGN3	ClusterGABA_neurons	ClusterImmature	0.000742965	NRXN2	NLGN3		ligand-receptor	Synaptic adhesion molecule
NRXN2_NLGN3	ClusterImmature	ClusterImmature	0.000658978	NRXN2	NLGN3		ligand-receptor	Synaptic adhesion molecule
NRXN2_NLGN3	ClusterOPCs	ClusterImmature	0.000357027	NRXN2	NLGN3		ligand-receptor	Synaptic adhesion molecule
NRXN2_NLGN3	ClustermGC	ClusterImmature	0.000220277	NRXN2	NLGN3		ligand-receptor	Synaptic adhesion molecule
NRXN2_NLGN3	ClusterCA2-4_neurons	ClusterOPCs	0.000961096	NRXN2	NLGN3		ligand-receptor	Synaptic adhesion molecule
NRXN2_NLGN3	ClusterCA_neurons	ClusterOPCs	0.00142676	NRXN2	NLGN3		ligand-receptor	Synaptic adhesion molecule
NRXN2_NLGN3	ClusterGABA_neurons	ClusterOPCs	0.00194261	NRXN2	NLGN3		ligand-receptor	Synaptic adhesion molecule
NRXN2_NLGN3	ClusterImmature	ClusterOPCs	0.00172301	NRXN2	NLGN3		ligand-receptor	Synaptic adhesion molecule
NRXN2_NLGN3	ClusterOPCs	ClusterOPCs	0.000933506	NRXN2	NLGN3		ligand-receptor	Synaptic adhesion molecule
NRXN2_NLGN3	ClustermGC	ClusterOPCs	0.000575952	NRXN2	NLGN3		ligand-receptor	Synaptic adhesion molecule
NRXN2_NLGN4X	ClusterCA2-4_neurons	ClusterAstrocytes	0.00163217	NRXN2	NLGN4X		ligand-receptor	Synaptic adhesion molecule
NRXN2_NLGN4X	ClusterCA_neurons	ClusterAstrocytes	0.00242297	NRXN2	NLGN4X		ligand-receptor	Synaptic adhesion molecule
NRXN2_NLGN4X	ClusterGABA_neurons	ClusterAstrocytes	0.003299	NRXN2	NLGN4X		ligand-receptor	Synaptic adhesion molecule
NRXN2_NLGN4X	ClusterImmature	ClusterAstrocytes	0.00292607	NRXN2	NLGN4X		ligand-receptor	Synaptic adhesion molecule
NRXN2_NLGN4X	ClusterOPCs	ClusterAstrocytes	0.00158531	NRXN2	NLGN4X		ligand-receptor	Synaptic adhesion molecule
NRXN2_NLGN4X	ClusterCA2-4_neurons	ClusterCA2.4_neurons	0.00488464	NRXN2	NLGN4X		ligand-receptor	Synaptic adhesion molecule
NRXN2_NLGN4X	ClusterCA_neurons	ClusterCA2.4_neurons	0.00725132	NRXN2	NLGN4X		ligand-receptor	Synaptic adhesion molecule
NRXN2_NLGN4X	ClusterGABA_neurons	ClusterCA2.4_neurons	0.00987303	NRXN2	NLGN4X		ligand-receptor	Synaptic adhesion molecule
NRXN2_NLGN4X	ClusterImmature	ClusterCA2.4_neurons	0.00875696	NRXN2	NLGN4X		ligand-receptor	Synaptic adhesion molecule
NRXN2_NLGN4X	ClusterOPCs	ClusterCA2.4_neurons	0.00474442	NRXN2	NLGN4X		ligand-receptor	Synaptic adhesion molecule
NRXN2_NLGN4X	ClustermGC	ClusterCA2.4_neurons	0.0029272	NRXN2	NLGN4X		ligand-receptor	Synaptic adhesion molecule
NRXN2_NLGN4X	ClusterCA2-4_neurons	ClusterCA_neurons	0.00575289	NRXN2	NLGN4X		ligand-receptor	Synaptic adhesion molecule
NRXN2_NLGN4X	ClusterCA_neurons	ClusterCA_neurons	0.00854025	NRXN2	NLGN4X		ligand-receptor	Synaptic adhesion molecule
NRXN2_NLGN4X	ClusterGABA_neurons	ClusterCA_neurons	0.011628	NRXN2	NLGN4X		ligand-receptor	Synaptic adhesion molecule
NRXN2_NLGN4X	ClusterImmature	ClusterCA_neurons	0.0103135	NRXN2	NLGN4X		ligand-receptor	Synaptic adhesion molecule
NRXN2_NLGN4X	ClusterOPCs	ClusterCA_neurons	0.00558775	NRXN2	NLGN4X		ligand-receptor	Synaptic adhesion molecule
NRXN2_NLGN4X	ClustermGC	ClusterCA_neurons	0.00344751	NRXN2	NLGN4X		ligand-receptor	Synaptic adhesion molecule
NRXN2_NLGN4X	ClusterCA_neurons	ClusterEpendymal	0.00139415	NRXN2	NLGN4X		ligand-receptor	Synaptic adhesion molecule
NRXN2_NLGN4X	ClusterGABA_neurons	ClusterEpendymal	0.0018982	NRXN2	NLGN4X		ligand-receptor	Synaptic adhesion molecule
NRXN2_NLGN4X	ClusterImmature	ClusterEpendymal	0.00168362	NRXN2	NLGN4X		ligand-receptor	Synaptic adhesion molecule
NRXN2_NLGN4X	ClusterCA2-4_neurons	ClusterGABA_neurons	0.00599037	NRXN2	NLGN4X		ligand-receptor	Synaptic adhesion molecule
NRXN2_NLGN4X	ClusterCA_neurons	ClusterGABA_neurons	0.00889279	NRXN2	NLGN4X		ligand-receptor	Synaptic adhesion molecule
NRXN2_NLGN4X	ClusterGABA_neurons	ClusterGABA_neurons	0.012108	NRXN2	NLGN4X		ligand-receptor	Synaptic adhesion molecule
NRXN2_NLGN4X	ClusterImmature	ClusterGABA_neurons	0.0107393	NRXN2	NLGN4X		ligand-receptor	Synaptic adhesion molecule
NRXN2_NLGN4X	ClusterOPCs	ClusterGABA_neurons	0.00581841	NRXN2	NLGN4X		ligand-receptor	Synaptic adhesion molecule
NRXN2_NLGN4X	ClustermGC	ClusterGABA_neurons	0.00358982	NRXN2	NLGN4X		ligand-receptor	Synaptic adhesion molecule
NRXN2_NLGN4X	ClusterCA2-4_neurons	ClusterImmature	0.00868096	NRXN2	NLGN4X		ligand-receptor	Synaptic adhesion molecule
NRXN2_NLGN4X	ClusterCA_neurons	ClusterImmature	0.012887	NRXN2	NLGN4X		ligand-receptor	Synaptic adhesion molecule
NRXN2_NLGN4X	ClusterGABA_neurons	ClusterImmature	0.0175463	NRXN2	NLGN4X		ligand-receptor	Synaptic adhesion molecule
NRXN2_NLGN4X	ClusterImmature	ClusterImmature	0.0155628	NRXN2	NLGN4X		ligand-receptor	Synaptic adhesion molecule
NRXN2_NLGN4X	ClusterOPCs	ClusterImmature	0.00843177	NRXN2	NLGN4X		ligand-receptor	Synaptic adhesion molecule
NRXN2_NLGN4X	ClustermGC	ClusterImmature	0.0052022	NRXN2	NLGN4X		ligand-receptor	Synaptic adhesion molecule
NRXN2_NLGN4X	ClusterCA2-4_neurons	ClusterNeural.Stem	0.00180378	NRXN2	NLGN4X		ligand-receptor	Synaptic adhesion molecule
NRXN2_NLGN4X	ClusterCA_neurons	ClusterNeural.Stem	0.00267773	NRXN2	NLGN4X		ligand-receptor	Synaptic adhesion molecule
NRXN2_NLGN4X	ClusterGABA_neurons	ClusterNeural.Stem	0.00364586	NRXN2	NLGN4X		ligand-receptor	Synaptic adhesion molecule
NRXN2_NLGN4X	ClusterImmature	ClusterNeural.Stem	0.00323372	NRXN2	NLGN4X		ligand-receptor	Synaptic adhesion molecule
NRXN2_NLGN4X	ClusterOPCs	ClusterNeural.Stem	0.001752	NRXN2	NLGN4X		ligand-receptor	Synaptic adhesion molecule
NRXN2_NLGN4X	ClustermGC	ClusterNeural.Stem	0.00108094	NRXN2	NLGN4X		ligand-receptor	Synaptic adhesion molecule
NRXN2_NLGN4X	ClusterCA2-4_neurons	ClusterOPCs	0.0106886	NRXN2	NLGN4X		ligand-receptor	Synaptic adhesion molecule
NRXN2_NLGN4X	ClusterCA_neurons	ClusterOPCs	0.0158674	NRXN2	NLGN4X		ligand-receptor	Synaptic adhesion molecule
NRXN2_NLGN4X	ClusterGABA_neurons	ClusterOPCs	0.0216043	NRXN2	NLGN4X		ligand-receptor	Synaptic adhesion molecule
NRXN2_NLGN4X	ClusterImmature	ClusterOPCs	0.0191621	NRXN2	NLGN4X		ligand-receptor	Synaptic adhesion molecule
NRXN2_NLGN4X	ClusterOPCs	ClusterOPCs	0.0103818	NRXN2	NLGN4X		ligand-receptor	Synaptic adhesion molecule
NRXN2_NLGN4X	ClustermGC	ClusterOPCs	0.00640534	NRXN2	NLGN4X		ligand-receptor	Synaptic adhesion molecule
NRXN2_NLGN4X	ClusterCA2-4_neurons	ClustermGC	0.00881451	NRXN2	NLGN4X		ligand-receptor	Synaptic adhesion molecule
NRXN2_NLGN4X	ClusterCA_neurons	ClustermGC	0.0130853	NRXN2	NLGN4X		ligand-receptor	Synaptic adhesion molecule
NRXN2_NLGN4X	ClusterGABA_neurons	ClustermGC	0.0178162	NRXN2	NLGN4X		ligand-receptor	Synaptic adhesion molecule
NRXN2_NLGN4X	ClusterImmature	ClustermGC	0.0158022	NRXN2	NLGN4X		ligand-receptor	Synaptic adhesion molecule
NRXN2_NLGN4X	ClusterOPCs	ClustermGC	0.00856148	NRXN2	NLGN4X		ligand-receptor	Synaptic adhesion molecule
NRXN2_NLGN4X	ClustermGC	ClustermGC	0.00528223	NRXN2	NLGN4X		ligand-receptor	Synaptic adhesion molecule
NRXN2_NLGN4Y	ClusterCA_neurons	ClusterAstrocytes	0.00247428	NRXN2	NLGN4Y		ligand-receptor	Synaptic adhesion molecule
NRXN2_NLGN4Y	ClusterGABA_neurons	ClusterAstrocytes	0.00336886	NRXN2	NLGN4Y		ligand-receptor	Synaptic adhesion molecule
NRXN2_NLGN4Y	ClusterImmature	ClusterAstrocytes	0.00298804	NRXN2	NLGN4Y		ligand-receptor	Synaptic adhesion molecule
NRXN2_NLGN4Y	ClusterCA2-4_neurons	ClusterCA2.4_neurons	0.00241901	NRXN2	NLGN4Y		ligand-receptor	Synaptic adhesion molecule
NRXN2_NLGN4Y	ClusterCA_neurons	ClusterCA2.4_neurons	0.00359105	NRXN2	NLGN4Y		ligand-receptor	Synaptic adhesion molecule
NRXN2_NLGN4Y	ClusterGABA_neurons	ClusterCA2.4_neurons	0.0048894	NRXN2	NLGN4Y		ligand-receptor	Synaptic adhesion molecule
NRXN2_NLGN4Y	ClusterImmature	ClusterCA2.4_neurons	0.00433668	NRXN2	NLGN4Y		ligand-receptor	Synaptic adhesion molecule
NRXN2_NLGN4Y	ClusterOPCs	ClusterCA2.4_neurons	0.00234957	NRXN2	NLGN4Y		ligand-receptor	Synaptic adhesion molecule
NRXN2_NLGN4Y	ClustermGC	ClusterCA2.4_neurons	0.00144963	NRXN2	NLGN4Y		ligand-receptor	Synaptic adhesion molecule
NRXN2_NLGN4Y	ClusterCA2-4_neurons	ClusterCA_neurons	0.00775398	NRXN2	NLGN4Y		ligand-receptor	Synaptic adhesion molecule
NRXN2_NLGN4Y	ClusterCA_neurons	ClusterCA_neurons	0.0115109	NRXN2	NLGN4Y		ligand-receptor	Synaptic adhesion molecule
NRXN2_NLGN4Y	ClusterGABA_neurons	ClusterCA_neurons	0.0156727	NRXN2	NLGN4Y		ligand-receptor	Synaptic adhesion molecule
NRXN2_NLGN4Y	ClusterImmature	ClusterCA_neurons	0.013901	NRXN2	NLGN4Y		ligand-receptor	Synaptic adhesion molecule
NRXN2_NLGN4Y	ClusterOPCs	ClusterCA_neurons	0.00753139	NRXN2	NLGN4Y		ligand-receptor	Synaptic adhesion molecule
NRXN2_NLGN4Y	ClustermGC	ClusterCA_neurons	0.00464669	NRXN2	NLGN4Y		ligand-receptor	Synaptic adhesion molecule
NRXN2_NLGN4Y	ClusterCA2-4_neurons	ClusterEpendymal	0.00301915	NRXN2	NLGN4Y		ligand-receptor	Synaptic adhesion molecule
NRXN2_NLGN4Y	ClusterCA_neurons	ClusterEpendymal	0.00448197	NRXN2	NLGN4Y		ligand-receptor	Synaptic adhesion molecule
NRXN2_NLGN4Y	ClusterGABA_neurons	ClusterEpendymal	0.00610243	NRXN2	NLGN4Y		ligand-receptor	Synaptic adhesion molecule
NRXN2_NLGN4Y	ClusterImmature	ClusterEpendymal	0.00541259	NRXN2	NLGN4Y		ligand-receptor	Synaptic adhesion molecule
NRXN2_NLGN4Y	ClusterOPCs	ClusterEpendymal	0.00293248	NRXN2	NLGN4Y		ligand-receptor	Synaptic adhesion molecule
NRXN2_NLGN4Y	ClustermGC	ClusterEpendymal	0.00180927	NRXN2	NLGN4Y		ligand-receptor	Synaptic adhesion molecule
NRXN2_NLGN4Y	ClusterCA2-4_neurons	ClusterGABA_neurons	0.00645002	NRXN2	NLGN4Y		ligand-receptor	Synaptic adhesion molecule
NRXN2_NLGN4Y	ClusterCA_neurons	ClusterGABA_neurons	0.00957515	NRXN2	NLGN4Y		ligand-receptor	Synaptic adhesion molecule
NRXN2_NLGN4Y	ClusterGABA_neurons	ClusterGABA_neurons	0.013037	NRXN2	NLGN4Y		ligand-receptor	Synaptic adhesion molecule
NRXN2_NLGN4Y	ClusterImmature	ClusterGABA_neurons	0.0115633	NRXN2	NLGN4Y		ligand-receptor	Synaptic adhesion molecule
NRXN2_NLGN4Y	ClusterOPCs	ClusterGABA_neurons	0.00626487	NRXN2	NLGN4Y		ligand-receptor	Synaptic adhesion molecule
NRXN2_NLGN4Y	ClustermGC	ClusterGABA_neurons	0.00386528	NRXN2	NLGN4Y		ligand-receptor	Synaptic adhesion molecule
NRXN2_NLGN4Y	ClusterCA2-4_neurons	ClusterImmature	0.00761144	NRXN2	NLGN4Y		ligand-receptor	Synaptic adhesion molecule
NRXN2_NLGN4Y	ClusterCA_neurons	ClusterImmature	0.0112993	NRXN2	NLGN4Y		ligand-receptor	Synaptic adhesion molecule
NRXN2_NLGN4Y	ClusterGABA_neurons	ClusterImmature	0.0153846	NRXN2	NLGN4Y		ligand-receptor	Synaptic adhesion molecule
NRXN2_NLGN4Y	ClusterImmature	ClusterImmature	0.0136454	NRXN2	NLGN4Y		ligand-receptor	Synaptic adhesion molecule
NRXN2_NLGN4Y	ClusterOPCs	ClusterImmature	0.00739295	NRXN2	NLGN4Y		ligand-receptor	Synaptic adhesion molecule
NRXN2_NLGN4Y	ClustermGC	ClusterImmature	0.00456128	NRXN2	NLGN4Y		ligand-receptor	Synaptic adhesion molecule
NRXN2_NLGN4Y	ClusterCA2-4_neurons	ClusterMicroglia	0.00182757	NRXN2	NLGN4Y		ligand-receptor	Synaptic adhesion molecule
NRXN2_NLGN4Y	ClusterCA_neurons	ClusterMicroglia	0.00271306	NRXN2	NLGN4Y		ligand-receptor	Synaptic adhesion molecule
NRXN2_NLGN4Y	ClusterGABA_neurons	ClusterMicroglia	0.00369396	NRXN2	NLGN4Y		ligand-receptor	Synaptic adhesion molecule
NRXN2_NLGN4Y	ClusterImmature	ClusterMicroglia	0.00327639	NRXN2	NLGN4Y		ligand-receptor	Synaptic adhesion molecule
NRXN2_NLGN4Y	ClusterOPCs	ClusterMicroglia	0.00177511	NRXN2	NLGN4Y		ligand-receptor	Synaptic adhesion molecule
NRXN2_NLGN4Y	ClusterCA2-4_neurons	ClusterNeuroblast	0.00189345	NRXN2	NLGN4Y		ligand-receptor	Synaptic adhesion molecule
NRXN2_NLGN4Y	ClusterCA_neurons	ClusterNeuroblast	0.00281085	NRXN2	NLGN4Y		ligand-receptor	Synaptic adhesion molecule
NRXN2_NLGN4Y	ClusterGABA_neurons	ClusterNeuroblast	0.00382712	NRXN2	NLGN4Y		ligand-receptor	Synaptic adhesion molecule
NRXN2_NLGN4Y	ClusterImmature	ClusterNeuroblast	0.00339449	NRXN2	NLGN4Y		ligand-receptor	Synaptic adhesion molecule
NRXN2_NLGN4Y	ClusterOPCs	ClusterNeuroblast	0.0018391	NRXN2	NLGN4Y		ligand-receptor	Synaptic adhesion molecule
NRXN2_NLGN4Y	ClusterCA2-4_neurons	ClusterOPCs	0.00865848	NRXN2	NLGN4Y		ligand-receptor	Synaptic adhesion molecule
NRXN2_NLGN4Y	ClusterCA_neurons	ClusterOPCs	0.0128536	NRXN2	NLGN4Y		ligand-receptor	Synaptic adhesion molecule
NRXN2_NLGN4Y	ClusterGABA_neurons	ClusterOPCs	0.0175009	NRXN2	NLGN4Y		ligand-receptor	Synaptic adhesion molecule
NRXN2_NLGN4Y	ClusterImmature	ClusterOPCs	0.0155225	NRXN2	NLGN4Y		ligand-receptor	Synaptic adhesion molecule
NRXN2_NLGN4Y	ClusterOPCs	ClusterOPCs	0.00840993	NRXN2	NLGN4Y		ligand-receptor	Synaptic adhesion molecule
NRXN2_NLGN4Y	ClustermGC	ClusterOPCs	0.00518873	NRXN2	NLGN4Y		ligand-receptor	Synaptic adhesion molecule
NRXN2_NLGN4Y	ClusterCA2-4_neurons	ClustermGC	0.00597546	NRXN2	NLGN4Y		ligand-receptor	Synaptic adhesion molecule
NRXN2_NLGN4Y	ClusterCA_neurons	ClustermGC	0.00887065	NRXN2	NLGN4Y		ligand-receptor	Synaptic adhesion molecule
NRXN2_NLGN4Y	ClusterGABA_neurons	ClustermGC	0.0120778	NRXN2	NLGN4Y		ligand-receptor	Synaptic adhesion molecule
NRXN2_NLGN4Y	ClusterImmature	ClustermGC	0.0107125	NRXN2	NLGN4Y		ligand-receptor	Synaptic adhesion molecule
NRXN2_NLGN4Y	ClusterOPCs	ClustermGC	0.00580392	NRXN2	NLGN4Y		ligand-receptor	Synaptic adhesion molecule
NRXN2_NLGN4Y	ClustermGC	ClustermGC	0.00358089	NRXN2	NLGN4Y		ligand-receptor	Synaptic adhesion molecule
NRXN2_NLGN4Y	ClusterCA2-4_neurons	ClustermOli	0.00206651	NRXN2	NLGN4Y		ligand-receptor	Synaptic adhesion molecule
NRXN2_NLGN4Y	ClusterCA_neurons	ClustermOli	0.00306776	NRXN2	NLGN4Y		ligand-receptor	Synaptic adhesion molecule
NRXN2_NLGN4Y	ClusterGABA_neurons	ClustermOli	0.00417691	NRXN2	NLGN4Y		ligand-receptor	Synaptic adhesion molecule
NRXN2_NLGN4Y	ClusterImmature	ClustermOli	0.00370474	NRXN2	NLGN4Y		ligand-receptor	Synaptic adhesion molecule
NRXN2_NLGN4Y	ClusterOPCs	ClustermOli	0.00200719	NRXN2	NLGN4Y		ligand-receptor	Synaptic adhesion molecule
NRXN3_NLGN1	ClusterCA2-4_neurons	ClusterCA2.4_neurons	0.335073	NRXN3	NLGN1		ligand-receptor	Synaptic adhesion molecule
NRXN3_NLGN1	ClusterCA_neurons	ClusterCA2.4_neurons	0.267258	NRXN3	NLGN1		ligand-receptor	Synaptic adhesion molecule
NRXN3_NLGN1	ClusterGABA_neurons	ClusterCA2.4_neurons	0.352835	NRXN3	NLGN1		ligand-receptor	Synaptic adhesion molecule
NRXN3_NLGN1	ClusterImmature	ClusterCA2.4_neurons	0.278003	NRXN3	NLGN1		ligand-receptor	Synaptic adhesion molecule
NRXN3_NLGN1	ClusterNeuroblast	ClusterCA2.4_neurons	0.196124	NRXN3	NLGN1		ligand-receptor	Synaptic adhesion molecule
NRXN3_NLGN1	ClustermGC	ClusterCA2.4_neurons	0.322444	NRXN3	NLGN1		ligand-receptor	Synaptic adhesion molecule
NRXN3_NLGN1	ClustermOli	ClusterCA2.4_neurons	0.250162	NRXN3	NLGN1		ligand-receptor	Synaptic adhesion molecule
NRXN3_NLGN1	ClusterCA2-4_neurons	ClusterCA_neurons	0.289563	NRXN3	NLGN1		ligand-receptor	Synaptic adhesion molecule
NRXN3_NLGN1	ClusterCA_neurons	ClusterCA_neurons	0.230958	NRXN3	NLGN1		ligand-receptor	Synaptic adhesion molecule
NRXN3_NLGN1	ClusterGABA_neurons	ClusterCA_neurons	0.304913	NRXN3	NLGN1		ligand-receptor	Synaptic adhesion molecule
NRXN3_NLGN1	ClusterImmature	ClusterCA_neurons	0.240244	NRXN3	NLGN1		ligand-receptor	Synaptic adhesion molecule
NRXN3_NLGN1	ClusterNeuroblast	ClusterCA_neurons	0.169486	NRXN3	NLGN1		ligand-receptor	Synaptic adhesion molecule
NRXN3_NLGN1	ClustermGC	ClusterCA_neurons	0.278649	NRXN3	NLGN1		ligand-receptor	Synaptic adhesion molecule
NRXN3_NLGN1	ClustermOli	ClusterCA_neurons	0.216184	NRXN3	NLGN1		ligand-receptor	Synaptic adhesion molecule
NRXN3_NLGN1	ClusterCA2-4_neurons	ClusterEpendymal	0.157044	NRXN3	NLGN1		ligand-receptor	Synaptic adhesion molecule
NRXN3_NLGN1	ClusterGABA_neurons	ClusterEpendymal	0.165368	NRXN3	NLGN1		ligand-receptor	Synaptic adhesion molecule
NRXN3_NLGN1	ClusterCA2-4_neurons	ClusterGABA_neurons	0.280802	NRXN3	NLGN1		ligand-receptor	Synaptic adhesion molecule
NRXN3_NLGN1	ClusterCA_neurons	ClusterGABA_neurons	0.22397	NRXN3	NLGN1		ligand-receptor	Synaptic adhesion molecule
NRXN3_NLGN1	ClusterGABA_neurons	ClusterGABA_neurons	0.295687	NRXN3	NLGN1		ligand-receptor	Synaptic adhesion molecule
NRXN3_NLGN1	ClusterImmature	ClusterGABA_neurons	0.232975	NRXN3	NLGN1		ligand-receptor	Synaptic adhesion molecule
NRXN3_NLGN1	ClusterNeuroblast	ClusterGABA_neurons	0.164358	NRXN3	NLGN1		ligand-receptor	Synaptic adhesion molecule
NRXN3_NLGN1	ClustermGC	ClusterGABA_neurons	0.270218	NRXN3	NLGN1		ligand-receptor	Synaptic adhesion molecule
NRXN3_NLGN1	ClustermOli	ClusterGABA_neurons	0.209643	NRXN3	NLGN1		ligand-receptor	Synaptic adhesion molecule
NRXN3_NLGN1	ClusterCA2-4_neurons	ClusterImmature	0.29927	NRXN3	NLGN1		ligand-receptor	Synaptic adhesion molecule
NRXN3_NLGN1	ClusterCA_neurons	ClusterImmature	0.238701	NRXN3	NLGN1		ligand-receptor	Synaptic adhesion molecule
NRXN3_NLGN1	ClusterGABA_neurons	ClusterImmature	0.315134	NRXN3	NLGN1		ligand-receptor	Synaptic adhesion molecule
NRXN3_NLGN1	ClusterImmature	ClusterImmature	0.248298	NRXN3	NLGN1		ligand-receptor	Synaptic adhesion molecule
NRXN3_NLGN1	ClusterNeuroblast	ClusterImmature	0.175167	NRXN3	NLGN1		ligand-receptor	Synaptic adhesion molecule
NRXN3_NLGN1	ClustermGC	ClusterImmature	0.28799	NRXN3	NLGN1		ligand-receptor	Synaptic adhesion molecule
NRXN3_NLGN1	ClustermOli	ClusterImmature	0.223432	NRXN3	NLGN1		ligand-receptor	Synaptic adhesion molecule
NRXN3_NLGN1	ClusterCA2-4_neurons	ClusterNeuroblast	0.234228	NRXN3	NLGN1		ligand-receptor	Synaptic adhesion molecule
NRXN3_NLGN1	ClusterCA_neurons	ClusterNeuroblast	0.186823	NRXN3	NLGN1		ligand-receptor	Synaptic adhesion molecule
NRXN3_NLGN1	ClusterGABA_neurons	ClusterNeuroblast	0.246644	NRXN3	NLGN1		ligand-receptor	Synaptic adhesion molecule
NRXN3_NLGN1	ClusterImmature	ClusterNeuroblast	0.194334	NRXN3	NLGN1		ligand-receptor	Synaptic adhesion molecule
NRXN3_NLGN1	ClustermGC	ClusterNeuroblast	0.2254	NRXN3	NLGN1		ligand-receptor	Synaptic adhesion molecule
NRXN3_NLGN1	ClustermOli	ClusterNeuroblast	0.174872	NRXN3	NLGN1		ligand-receptor	Synaptic adhesion molecule
NRXN3_NLGN1	ClusterCA2-4_neurons	ClusterOPCs	0.36886	NRXN3	NLGN1		ligand-receptor	Synaptic adhesion molecule
NRXN3_NLGN1	ClusterCA_neurons	ClusterOPCs	0.294206	NRXN3	NLGN1		ligand-receptor	Synaptic adhesion molecule
NRXN3_NLGN1	ClusterGABA_neurons	ClusterOPCs	0.388412	NRXN3	NLGN1		ligand-receptor	Synaptic adhesion molecule
NRXN3_NLGN1	ClusterImmature	ClusterOPCs	0.306034	NRXN3	NLGN1		ligand-receptor	Synaptic adhesion molecule
NRXN3_NLGN1	ClusterNeuroblast	ClusterOPCs	0.215899	NRXN3	NLGN1		ligand-receptor	Synaptic adhesion molecule
NRXN3_NLGN1	ClustermGC	ClusterOPCs	0.354957	NRXN3	NLGN1		ligand-receptor	Synaptic adhesion molecule
NRXN3_NLGN1	ClustermOli	ClusterOPCs	0.275386	NRXN3	NLGN1		ligand-receptor	Synaptic adhesion molecule
NRXN3_NLGN1	ClusterCA2-4_neurons	ClustermGC	0.313101	NRXN3	NLGN1		ligand-receptor	Synaptic adhesion molecule
NRXN3_NLGN1	ClusterCA_neurons	ClustermGC	0.249732	NRXN3	NLGN1		ligand-receptor	Synaptic adhesion molecule
NRXN3_NLGN1	ClusterGABA_neurons	ClustermGC	0.329698	NRXN3	NLGN1		ligand-receptor	Synaptic adhesion molecule
NRXN3_NLGN1	ClusterImmature	ClustermGC	0.259773	NRXN3	NLGN1		ligand-receptor	Synaptic adhesion molecule
NRXN3_NLGN1	ClusterNeuroblast	ClustermGC	0.183263	NRXN3	NLGN1		ligand-receptor	Synaptic adhesion molecule
NRXN3_NLGN1	ClustermGC	ClustermGC	0.3013	NRXN3	NLGN1		ligand-receptor	Synaptic adhesion molecule
NRXN3_NLGN1	ClustermOli	ClustermGC	0.233758	NRXN3	NLGN1		ligand-receptor	Synaptic adhesion molecule
NRXN3_NLGN1	ClusterCA2-4_neurons	ClustermOli	0.25706	NRXN3	NLGN1		ligand-receptor	Synaptic adhesion molecule
NRXN3_NLGN1	ClusterCA_neurons	ClustermOli	0.205033	NRXN3	NLGN1		ligand-receptor	Synaptic adhesion molecule
NRXN3_NLGN1	ClusterGABA_neurons	ClustermOli	0.270686	NRXN3	NLGN1		ligand-receptor	Synaptic adhesion molecule
NRXN3_NLGN1	ClusterImmature	ClustermOli	0.213277	NRXN3	NLGN1		ligand-receptor	Synaptic adhesion molecule
NRXN3_NLGN1	ClustermGC	ClustermOli	0.247371	NRXN3	NLGN1		ligand-receptor	Synaptic adhesion molecule
NRXN3_NLGN1	ClustermOli	ClustermOli	0.191918	NRXN3	NLGN1		ligand-receptor	Synaptic adhesion molecule
NRXN3_NLGN2	ClusterCA2-4_neurons	ClusterCA2.4_neurons	0.00346877	NRXN3	NLGN2		ligand-receptor	Synaptic adhesion molecule
NRXN3_NLGN2	ClusterCA_neurons	ClusterCA2.4_neurons	0.00276672	NRXN3	NLGN2		ligand-receptor	Synaptic adhesion molecule
NRXN3_NLGN2	ClusterEndothelial	ClusterCA2.4_neurons	0.000282696	NRXN3	NLGN2		ligand-receptor	Synaptic adhesion molecule
NRXN3_NLGN2	ClusterEpendymal	ClusterCA2.4_neurons	0.000665094	NRXN3	NLGN2		ligand-receptor	Synaptic adhesion molecule
NRXN3_NLGN2	ClusterGABA_neurons	ClusterCA2.4_neurons	0.00365264	NRXN3	NLGN2		ligand-receptor	Synaptic adhesion molecule
NRXN3_NLGN2	ClusterImmature	ClusterCA2.4_neurons	0.00287795	NRXN3	NLGN2		ligand-receptor	Synaptic adhesion molecule
NRXN3_NLGN2	ClusterNeural Stem	ClusterCA2.4_neurons	0.000191223	NRXN3	NLGN2		ligand-receptor	Synaptic adhesion molecule
NRXN3_NLGN2	ClusterNeuroblast	ClusterCA2.4_neurons	0.00203032	NRXN3	NLGN2		ligand-receptor	Synaptic adhesion molecule
NRXN3_NLGN2	ClusterOPCs	ClusterCA2.4_neurons	0.00115312	NRXN3	NLGN2		ligand-receptor	Synaptic adhesion molecule
NRXN3_NLGN2	ClustermGC	ClusterCA2.4_neurons	0.00333802	NRXN3	NLGN2		ligand-receptor	Synaptic adhesion molecule
NRXN3_NLGN2	ClustermOli	ClusterCA2.4_neurons	0.00258974	NRXN3	NLGN2		ligand-receptor	Synaptic adhesion molecule
NRXN3_NLGN2	ClusterCA2-4_neurons	ClusterCA_neurons	0.00428391	NRXN3	NLGN2		ligand-receptor	Synaptic adhesion molecule
NRXN3_NLGN2	ClusterCA_neurons	ClusterCA_neurons	0.00341689	NRXN3	NLGN2		ligand-receptor	Synaptic adhesion molecule
NRXN3_NLGN2	ClusterEndothelial	ClusterCA_neurons	0.000349128	NRXN3	NLGN2		ligand-receptor	Synaptic adhesion molecule
NRXN3_NLGN2	ClusterEpendymal	ClusterCA_neurons	0.000821388	NRXN3	NLGN2		ligand-receptor	Synaptic adhesion molecule
NRXN3_NLGN2	ClusterGABA_neurons	ClusterCA_neurons	0.00451099	NRXN3	NLGN2		ligand-receptor	Synaptic adhesion molecule
NRXN3_NLGN2	ClusterImmature	ClusterCA_neurons	0.00355426	NRXN3	NLGN2		ligand-receptor	Synaptic adhesion molecule
NRXN3_NLGN2	ClusterNeural Stem	ClusterCA_neurons	0.00023616	NRXN3	NLGN2		ligand-receptor	Synaptic adhesion molecule
NRXN3_NLGN2	ClusterNeuroblast	ClusterCA_neurons	0.00250744	NRXN3	NLGN2		ligand-receptor	Synaptic adhesion molecule
NRXN3_NLGN2	ClusterOPCs	ClusterCA_neurons	0.0014241	NRXN3	NLGN2		ligand-receptor	Synaptic adhesion molecule
NRXN3_NLGN2	ClustermGC	ClusterCA_neurons	0.00412245	NRXN3	NLGN2		ligand-receptor	Synaptic adhesion molecule
NRXN3_NLGN2	ClustermOli	ClusterCA_neurons	0.00319832	NRXN3	NLGN2		ligand-receptor	Synaptic adhesion molecule
NRXN3_NLGN2	ClusterCA2-4_neurons	ClusterImmature	0.00798449	NRXN3	NLGN2		ligand-receptor	Synaptic adhesion molecule
NRXN3_NLGN2	ClusterCA_neurons	ClusterImmature	0.0063685	NRXN3	NLGN2		ligand-receptor	Synaptic adhesion molecule
NRXN3_NLGN2	ClusterEndothelial	ClusterImmature	0.000650716	NRXN3	NLGN2		ligand-receptor	Synaptic adhesion molecule
NRXN3_NLGN2	ClusterEpendymal	ClusterImmature	0.00153093	NRXN3	NLGN2		ligand-receptor	Synaptic adhesion molecule
NRXN3_NLGN2	ClusterGABA_neurons	ClusterImmature	0.00840773	NRXN3	NLGN2		ligand-receptor	Synaptic adhesion molecule
NRXN3_NLGN2	ClusterImmature	ClusterImmature	0.00662454	NRXN3	NLGN2		ligand-receptor	Synaptic adhesion molecule
NRXN3_NLGN2	ClusterNeural Stem	ClusterImmature	0.000440163	NRXN3	NLGN2		ligand-receptor	Synaptic adhesion molecule
NRXN3_NLGN2	ClusterNeuroblast	ClusterImmature	0.00467344	NRXN3	NLGN2		ligand-receptor	Synaptic adhesion molecule
NRXN3_NLGN2	ClusterOPCs	ClusterImmature	0.00265429	NRXN3	NLGN2		ligand-receptor	Synaptic adhesion molecule
NRXN3_NLGN2	ClustermGC	ClusterImmature	0.00768354	NRXN3	NLGN2		ligand-receptor	Synaptic adhesion molecule
NRXN3_NLGN2	ClustermOli	ClusterImmature	0.00596112	NRXN3	NLGN2		ligand-receptor	Synaptic adhesion molecule
NRXN3_NLGN3	ClusterCA2-4_neurons	ClusterCA2.4_neurons	0.00326848	NRXN3	NLGN3	Nrxn2,Nrxn1,Nrxn3	ligand-receptor	Synaptic adhesion molecule
NRXN3_NLGN3	ClusterCA_neurons	ClusterCA2.4_neurons	0.00260697	NRXN3	NLGN3	Nrxn2,Nrxn1,Nrxn3	ligand-receptor	Synaptic adhesion molecule
NRXN3_NLGN3	ClusterEndothelial	ClusterCA2.4_neurons	0.000266373	NRXN3	NLGN3	Nrxn2,Nrxn1,Nrxn3	ligand-receptor	Synaptic adhesion molecule
NRXN3_NLGN3	ClusterEpendymal	ClusterCA2.4_neurons	0.000626692	NRXN3	NLGN3	Nrxn2,Nrxn1,Nrxn3	ligand-receptor	Synaptic adhesion molecule
NRXN3_NLGN3	ClusterGABA_neurons	ClusterCA2.4_neurons	0.00344174	NRXN3	NLGN3	Nrxn2,Nrxn1,Nrxn3	ligand-receptor	Synaptic adhesion molecule
NRXN3_NLGN3	ClusterImmature	ClusterCA2.4_neurons	0.00271178	NRXN3	NLGN3	Nrxn2,Nrxn1,Nrxn3	ligand-receptor	Synaptic adhesion molecule
NRXN3_NLGN3	ClusterNeural Stem	ClusterCA2.4_neurons	0.000180182	NRXN3	NLGN3	Nrxn2,Nrxn1,Nrxn3	ligand-receptor	Synaptic adhesion molecule
NRXN3_NLGN3	ClusterNeuroblast	ClusterCA2.4_neurons	0.00191309	NRXN3	NLGN3	Nrxn2,Nrxn1,Nrxn3	ligand-receptor	Synaptic adhesion molecule
NRXN3_NLGN3	ClusterOPCs	ClusterCA2.4_neurons	0.00108654	NRXN3	NLGN3	Nrxn2,Nrxn1,Nrxn3	ligand-receptor	Synaptic adhesion molecule
NRXN3_NLGN3	ClustermGC	ClusterCA2.4_neurons	0.00314529	NRXN3	NLGN3	Nrxn2,Nrxn1,Nrxn3	ligand-receptor	Synaptic adhesion molecule
NRXN3_NLGN3	ClustermOli	ClusterCA2.4_neurons	0.00244021	NRXN3	NLGN3	Nrxn2,Nrxn1,Nrxn3	ligand-receptor	Synaptic adhesion molecule
NRXN3_NLGN3	ClusterCA2-4_neurons	ClusterImmature	0.00653298	NRXN3	NLGN3	Nrxn2,Nrxn1,Nrxn3	ligand-receptor	Synaptic adhesion molecule
NRXN3_NLGN3	ClusterCA_neurons	ClusterImmature	0.00521077	NRXN3	NLGN3	Nrxn2,Nrxn1,Nrxn3	ligand-receptor	Synaptic adhesion molecule
NRXN3_NLGN3	ClusterEndothelial	ClusterImmature	0.000532422	NRXN3	NLGN3	Nrxn2,Nrxn1,Nrxn3	ligand-receptor	Synaptic adhesion molecule
NRXN3_NLGN3	ClusterEpendymal	ClusterImmature	0.00125262	NRXN3	NLGN3	Nrxn2,Nrxn1,Nrxn3	ligand-receptor	Synaptic adhesion molecule
NRXN3_NLGN3	ClusterGABA_neurons	ClusterImmature	0.00687929	NRXN3	NLGN3	Nrxn2,Nrxn1,Nrxn3	ligand-receptor	Synaptic adhesion molecule
NRXN3_NLGN3	ClusterImmature	ClusterImmature	0.00542026	NRXN3	NLGN3	Nrxn2,Nrxn1,Nrxn3	ligand-receptor	Synaptic adhesion molecule
NRXN3_NLGN3	ClusterNeural Stem	ClusterImmature	0.000360145	NRXN3	NLGN3	Nrxn2,Nrxn1,Nrxn3	ligand-receptor	Synaptic adhesion molecule
NRXN3_NLGN3	ClusterNeuroblast	ClusterImmature	0.00382385	NRXN3	NLGN3	Nrxn2,Nrxn1,Nrxn3	ligand-receptor	Synaptic adhesion molecule
NRXN3_NLGN3	ClusterOPCs	ClusterImmature	0.00217176	NRXN3	NLGN3	Nrxn2,Nrxn1,Nrxn3	ligand-receptor	Synaptic adhesion molecule
NRXN3_NLGN3	ClustermGC	ClusterImmature	0.00628675	NRXN3	NLGN3	Nrxn2,Nrxn1,Nrxn3	ligand-receptor	Synaptic adhesion molecule
NRXN3_NLGN3	ClustermOli	ClusterImmature	0.00487744	NRXN3	NLGN3	Nrxn2,Nrxn1,Nrxn3	ligand-receptor	Synaptic adhesion molecule
NRXN3_NLGN3	ClusterCA2-4_neurons	ClusterOPCs	0.0170816	NRXN3	NLGN3	Nrxn2,Nrxn1,Nrxn3	ligand-receptor	Synaptic adhesion molecule
NRXN3_NLGN3	ClusterCA_neurons	ClusterOPCs	0.0136244	NRXN3	NLGN3	Nrxn2,Nrxn1,Nrxn3	ligand-receptor	Synaptic adhesion molecule
NRXN3_NLGN3	ClusterEndothelial	ClusterOPCs	0.00139211	NRXN3	NLGN3	Nrxn2,Nrxn1,Nrxn3	ligand-receptor	Synaptic adhesion molecule
NRXN3_NLGN3	ClusterEpendymal	ClusterOPCs	0.00327518	NRXN3	NLGN3	Nrxn2,Nrxn1,Nrxn3	ligand-receptor	Synaptic adhesion molecule
NRXN3_NLGN3	ClusterGABA_neurons	ClusterOPCs	0.017987	NRXN3	NLGN3	Nrxn2,Nrxn1,Nrxn3	ligand-receptor	Synaptic adhesion molecule
NRXN3_NLGN3	ClusterImmature	ClusterOPCs	0.0141722	NRXN3	NLGN3	Nrxn2,Nrxn1,Nrxn3	ligand-receptor	Synaptic adhesion molecule
NRXN3_NLGN3	ClusterNeural Stem	ClusterOPCs	0.000941659	NRXN3	NLGN3	Nrxn2,Nrxn1,Nrxn3	ligand-receptor	Synaptic adhesion molecule
NRXN3_NLGN3	ClusterNeuroblast	ClusterOPCs	0.00999809	NRXN3	NLGN3	Nrxn2,Nrxn1,Nrxn3	ligand-receptor	Synaptic adhesion molecule
NRXN3_NLGN3	ClusterOPCs	ClusterOPCs	0.00567843	NRXN3	NLGN3	Nrxn2,Nrxn1,Nrxn3	ligand-receptor	Synaptic adhesion molecule
NRXN3_NLGN3	ClustermGC	ClusterOPCs	0.0164377	NRXN3	NLGN3	Nrxn2,Nrxn1,Nrxn3	ligand-receptor	Synaptic adhesion molecule
NRXN3_NLGN3	ClustermOli	ClusterOPCs	0.0127529	NRXN3	NLGN3	Nrxn2,Nrxn1,Nrxn3	ligand-receptor	Synaptic adhesion molecule
NRXN3_NLGN4X	ClusterCA2-4_neurons	ClusterCA2.4_neurons	0.0868148	NRXN3	NLGN4X		ligand-receptor	Synaptic adhesion molecule
NRXN3_NLGN4X	ClusterCA_neurons	ClusterCA2.4_neurons	0.0692442	NRXN3	NLGN4X		ligand-receptor	Synaptic adhesion molecule
NRXN3_NLGN4X	ClusterGABA_neurons	ClusterCA2.4_neurons	0.0914167	NRXN3	NLGN4X		ligand-receptor	Synaptic adhesion molecule
NRXN3_NLGN4X	ClusterImmature	ClusterCA2.4_neurons	0.0720282	NRXN3	NLGN4X		ligand-receptor	Synaptic adhesion molecule
NRXN3_NLGN4X	ClusterNeuroblast	ClusterCA2.4_neurons	0.050814	NRXN3	NLGN4X		ligand-receptor	Synaptic adhesion molecule
NRXN3_NLGN4X	ClustermGC	ClusterCA2.4_neurons	0.0835426	NRXN3	NLGN4X		ligand-receptor	Synaptic adhesion molecule
NRXN3_NLGN4X	ClustermOli	ClusterCA2.4_neurons	0.0648148	NRXN3	NLGN4X		ligand-receptor	Synaptic adhesion molecule
NRXN3_NLGN4X	ClusterCA2-4_neurons	ClusterCA_neurons	0.102246	NRXN3	NLGN4X		ligand-receptor	Synaptic adhesion molecule
NRXN3_NLGN4X	ClusterCA_neurons	ClusterCA_neurons	0.0815525	NRXN3	NLGN4X		ligand-receptor	Synaptic adhesion molecule
NRXN3_NLGN4X	ClusterGABA_neurons	ClusterCA_neurons	0.107666	NRXN3	NLGN4X		ligand-receptor	Synaptic adhesion molecule
NRXN3_NLGN4X	ClusterImmature	ClusterCA_neurons	0.0848313	NRXN3	NLGN4X		ligand-receptor	Synaptic adhesion molecule
NRXN3_NLGN4X	ClusterNeuroblast	ClusterCA_neurons	0.0598462	NRXN3	NLGN4X		ligand-receptor	Synaptic adhesion molecule
NRXN3_NLGN4X	ClustermGC	ClusterCA_neurons	0.0983925	NRXN3	NLGN4X		ligand-receptor	Synaptic adhesion molecule
NRXN3_NLGN4X	ClustermOli	ClusterCA_neurons	0.0763358	NRXN3	NLGN4X		ligand-receptor	Synaptic adhesion molecule
NRXN3_NLGN4X	ClusterCA2-4_neurons	ClusterGABA_neurons	0.106467	NRXN3	NLGN4X		ligand-receptor	Synaptic adhesion molecule
NRXN3_NLGN4X	ClusterCA_neurons	ClusterGABA_neurons	0.084919	NRXN3	NLGN4X		ligand-receptor	Synaptic adhesion molecule
NRXN3_NLGN4X	ClusterGABA_neurons	ClusterGABA_neurons	0.112111	NRXN3	NLGN4X		ligand-receptor	Synaptic adhesion molecule
NRXN3_NLGN4X	ClusterImmature	ClusterGABA_neurons	0.0883331	NRXN3	NLGN4X		ligand-receptor	Synaptic adhesion molecule
NRXN3_NLGN4X	ClusterNeuroblast	ClusterGABA_neurons	0.0623167	NRXN3	NLGN4X		ligand-receptor	Synaptic adhesion molecule
NRXN3_NLGN4X	ClustermGC	ClusterGABA_neurons	0.102454	NRXN3	NLGN4X		ligand-receptor	Synaptic adhesion molecule
NRXN3_NLGN4X	ClustermOli	ClusterGABA_neurons	0.0794869	NRXN3	NLGN4X		ligand-receptor	Synaptic adhesion molecule
NRXN3_NLGN4X	ClusterCA2-4_neurons	ClusterImmature	0.154287	NRXN3	NLGN4X		ligand-receptor	Synaptic adhesion molecule
NRXN3_NLGN4X	ClusterCA_neurons	ClusterImmature	0.123061	NRXN3	NLGN4X		ligand-receptor	Synaptic adhesion molecule
NRXN3_NLGN4X	ClusterGABA_neurons	ClusterImmature	0.162465	NRXN3	NLGN4X		ligand-receptor	Synaptic adhesion molecule
NRXN3_NLGN4X	ClusterImmature	ClusterImmature	0.128008	NRXN3	NLGN4X		ligand-receptor	Synaptic adhesion molecule
NRXN3_NLGN4X	ClusterNeuroblast	ClusterImmature	0.0903064	NRXN3	NLGN4X		ligand-receptor	Synaptic adhesion molecule
NRXN3_NLGN4X	ClusterOPCs	ClusterImmature	0.0512897	NRXN3	NLGN4X		ligand-receptor	Synaptic adhesion molecule
NRXN3_NLGN4X	ClustermGC	ClusterImmature	0.148472	NRXN3	NLGN4X		ligand-receptor	Synaptic adhesion molecule
NRXN3_NLGN4X	ClustermOli	ClusterImmature	0.115189	NRXN3	NLGN4X		ligand-receptor	Synaptic adhesion molecule
NRXN3_NLGN4X	ClusterCA2-4_neurons	ClusterOPCs	0.189969	NRXN3	NLGN4X		ligand-receptor	Synaptic adhesion molecule
NRXN3_NLGN4X	ClusterCA_neurons	ClusterOPCs	0.151521	NRXN3	NLGN4X		ligand-receptor	Synaptic adhesion molecule
NRXN3_NLGN4X	ClusterGABA_neurons	ClusterOPCs	0.200039	NRXN3	NLGN4X		ligand-receptor	Synaptic adhesion molecule
NRXN3_NLGN4X	ClusterImmature	ClusterOPCs	0.157613	NRXN3	NLGN4X		ligand-receptor	Synaptic adhesion molecule
NRXN3_NLGN4X	ClusterNeuroblast	ClusterOPCs	0.111192	NRXN3	NLGN4X		ligand-receptor	Synaptic adhesion molecule
NRXN3_NLGN4X	ClusterOPCs	ClusterOPCs	0.0631516	NRXN3	NLGN4X		ligand-receptor	Synaptic adhesion molecule
NRXN3_NLGN4X	ClustermGC	ClusterOPCs	0.182809	NRXN3	NLGN4X		ligand-receptor	Synaptic adhesion molecule
NRXN3_NLGN4X	ClustermOli	ClusterOPCs	0.141829	NRXN3	NLGN4X		ligand-receptor	Synaptic adhesion molecule
NRXN3_NLGN4X	ClusterCA2-4_neurons	ClustermGC	0.15666	NRXN3	NLGN4X		ligand-receptor	Synaptic adhesion molecule
NRXN3_NLGN4X	ClusterCA_neurons	ClustermGC	0.124954	NRXN3	NLGN4X		ligand-receptor	Synaptic adhesion molecule
NRXN3_NLGN4X	ClusterGABA_neurons	ClustermGC	0.164965	NRXN3	NLGN4X		ligand-receptor	Synaptic adhesion molecule
NRXN3_NLGN4X	ClusterImmature	ClustermGC	0.129977	NRXN3	NLGN4X		ligand-receptor	Synaptic adhesion molecule
NRXN3_NLGN4X	ClusterNeuroblast	ClustermGC	0.0916957	NRXN3	NLGN4X		ligand-receptor	Synaptic adhesion molecule
NRXN3_NLGN4X	ClusterOPCs	ClustermGC	0.0520787	NRXN3	NLGN4X		ligand-receptor	Synaptic adhesion molecule
NRXN3_NLGN4X	ClustermGC	ClustermGC	0.150756	NRXN3	NLGN4X		ligand-receptor	Synaptic adhesion molecule
NRXN3_NLGN4X	ClustermOli	ClustermGC	0.116961	NRXN3	NLGN4X		ligand-receptor	Synaptic adhesion molecule
NRXN3_NLGN4Y	ClusterCA2-4_neurons	ClusterCA_neurons	0.137812	NRXN3	NLGN4Y		ligand-receptor	Synaptic adhesion molecule
NRXN3_NLGN4Y	ClusterCA_neurons	ClusterCA_neurons	0.10992	NRXN3	NLGN4Y		ligand-receptor	Synaptic adhesion molecule
NRXN3_NLGN4Y	ClusterGABA_neurons	ClusterCA_neurons	0.145117	NRXN3	NLGN4Y		ligand-receptor	Synaptic adhesion molecule
NRXN3_NLGN4Y	ClusterImmature	ClusterCA_neurons	0.114339	NRXN3	NLGN4Y		ligand-receptor	Synaptic adhesion molecule
NRXN3_NLGN4Y	ClusterNeuroblast	ClusterCA_neurons	0.0806632	NRXN3	NLGN4Y		ligand-receptor	Synaptic adhesion molecule
NRXN3_NLGN4Y	ClustermGC	ClusterCA_neurons	0.132617	NRXN3	NLGN4Y		ligand-receptor	Synaptic adhesion molecule
NRXN3_NLGN4Y	ClustermOli	ClusterCA_neurons	0.102888	NRXN3	NLGN4Y		ligand-receptor	Synaptic adhesion molecule
NRXN3_NLGN4Y	ClusterCA2-4_neurons	ClusterEpendymal	0.0536594	NRXN3	NLGN4Y		ligand-receptor	Synaptic adhesion molecule
NRXN3_NLGN4Y	ClusterGABA_neurons	ClusterEpendymal	0.0565038	NRXN3	NLGN4Y		ligand-receptor	Synaptic adhesion molecule
NRXN3_NLGN4Y	ClusterCA2-4_neurons	ClusterGABA_neurons	0.114636	NRXN3	NLGN4Y		ligand-receptor	Synaptic adhesion molecule
NRXN3_NLGN4Y	ClusterCA_neurons	ClusterGABA_neurons	0.091435	NRXN3	NLGN4Y		ligand-receptor	Synaptic adhesion molecule
NRXN3_NLGN4Y	ClusterGABA_neurons	ClusterGABA_neurons	0.120713	NRXN3	NLGN4Y		ligand-receptor	Synaptic adhesion molecule
NRXN3_NLGN4Y	ClusterImmature	ClusterGABA_neurons	0.0951111	NRXN3	NLGN4Y		ligand-receptor	Synaptic adhesion molecule
NRXN3_NLGN4Y	ClusterNeuroblast	ClusterGABA_neurons	0.0670984	NRXN3	NLGN4Y		ligand-receptor	Synaptic adhesion molecule
NRXN3_NLGN4Y	ClustermGC	ClusterGABA_neurons	0.110316	NRXN3	NLGN4Y		ligand-receptor	Synaptic adhesion molecule
NRXN3_NLGN4Y	ClustermOli	ClusterGABA_neurons	0.0855861	NRXN3	NLGN4Y		ligand-receptor	Synaptic adhesion molecule
NRXN3_NLGN4Y	ClusterCA2-4_neurons	ClusterImmature	0.135278	NRXN3	NLGN4Y		ligand-receptor	Synaptic adhesion molecule
NRXN3_NLGN4Y	ClusterCA_neurons	ClusterImmature	0.107899	NRXN3	NLGN4Y		ligand-receptor	Synaptic adhesion molecule
NRXN3_NLGN4Y	ClusterGABA_neurons	ClusterImmature	0.142449	NRXN3	NLGN4Y		ligand-receptor	Synaptic adhesion molecule
NRXN3_NLGN4Y	ClusterImmature	ClusterImmature	0.112237	NRXN3	NLGN4Y		ligand-receptor	Synaptic adhesion molecule
NRXN3_NLGN4Y	ClusterNeuroblast	ClusterImmature	0.0791804	NRXN3	NLGN4Y		ligand-receptor	Synaptic adhesion molecule
NRXN3_NLGN4Y	ClustermGC	ClusterImmature	0.130179	NRXN3	NLGN4Y		ligand-receptor	Synaptic adhesion molecule
NRXN3_NLGN4Y	ClustermOli	ClusterImmature	0.100997	NRXN3	NLGN4Y		ligand-receptor	Synaptic adhesion molecule
NRXN3_NLGN4Y	ClusterCA2-4_neurons	ClusterOPCs	0.153887	NRXN3	NLGN4Y		ligand-receptor	Synaptic adhesion molecule
NRXN3_NLGN4Y	ClusterCA_neurons	ClusterOPCs	0.122742	NRXN3	NLGN4Y		ligand-receptor	Synaptic adhesion molecule
NRXN3_NLGN4Y	ClusterGABA_neurons	ClusterOPCs	0.162045	NRXN3	NLGN4Y		ligand-receptor	Synaptic adhesion molecule
NRXN3_NLGN4Y	ClusterImmature	ClusterOPCs	0.127677	NRXN3	NLGN4Y		ligand-receptor	Synaptic adhesion molecule
NRXN3_NLGN4Y	ClusterNeuroblast	ClusterOPCs	0.0900725	NRXN3	NLGN4Y		ligand-receptor	Synaptic adhesion molecule
NRXN3_NLGN4Y	ClusterOPCs	ClusterOPCs	0.0511568	NRXN3	NLGN4Y		ligand-receptor	Synaptic adhesion molecule
NRXN3_NLGN4Y	ClustermGC	ClusterOPCs	0.148087	NRXN3	NLGN4Y		ligand-receptor	Synaptic adhesion molecule
NRXN3_NLGN4Y	ClustermOli	ClusterOPCs	0.11489	NRXN3	NLGN4Y		ligand-receptor	Synaptic adhesion molecule
NRXN3_NLGN4Y	ClusterCA2-4_neurons	ClustermGC	0.106202	NRXN3	NLGN4Y		ligand-receptor	Synaptic adhesion molecule
NRXN3_NLGN4Y	ClusterCA_neurons	ClustermGC	0.0847076	NRXN3	NLGN4Y		ligand-receptor	Synaptic adhesion molecule
NRXN3_NLGN4Y	ClusterGABA_neurons	ClustermGC	0.111831	NRXN3	NLGN4Y		ligand-receptor	Synaptic adhesion molecule
NRXN3_NLGN4Y	ClusterImmature	ClustermGC	0.0881132	NRXN3	NLGN4Y		ligand-receptor	Synaptic adhesion molecule
NRXN3_NLGN4Y	ClusterNeuroblast	ClustermGC	0.0621615	NRXN3	NLGN4Y		ligand-receptor	Synaptic adhesion molecule
NRXN3_NLGN4Y	ClustermGC	ClustermGC	0.102199	NRXN3	NLGN4Y		ligand-receptor	Synaptic adhesion molecule
NRXN3_NLGN4Y	ClustermOli	ClustermGC	0.079289	NRXN3	NLGN4Y		ligand-receptor	Synaptic adhesion molecule
PDYN_OPRD1	ClusterImmature	ClusterCA_neurons	0.000216188	PDYN	OPRD1	Pomc,Pdyn,Penk	ligand-receptor	Neuropeptide
PDYN_OPRD1	ClusterImmature	ClusterImmature	0.000341506	PDYN	OPRD1	Pomc,Pdyn,Penk	ligand-receptor	Neuropeptide
PDYN_OPRD1	ClusterImmature	ClustermGC	0.00037176	PDYN	OPRD1	Pomc,Pdyn,Penk	ligand-receptor	Neuropeptide
PDYN_OPRK1	ClusterImmature	ClusterImmature	0.000215484	PDYN	OPRK1	Pdyn,Pomc,Penk,Mecp2,Gabarapl1	ligand-receptor	Neuropeptide
PDYN_OPRM1	ClusterImmature	ClusterCA_neurons	0.000146646	PDYN	OPRM1	Pdyn,Penk,Grk2,Rpn1,Pomc,Pld2	ligand-receptor	Neuropeptide
PDYN_OPRM1	ClusterImmature	ClusterGABA_neurons	0.000356945	PDYN	OPRM1	Pdyn,Penk,Grk2,Rpn1,Pomc,Pld2	ligand-receptor	Neuropeptide

## Sheet: cluster_interactions
Unnamed: 0	ClusterAstrocytes	ClusterCA2-4_neurons	ClusterCA_neurons	ClusterEndothelial	ClusterEpendymal	ClusterGABA_neurons	ClusterImmature	ClusterMicroglia	ClusterNeural Stem	ClusterNeuroblast	ClusterOPCs	ClustermGC	ClustermOli
ClusterAstrocytes	0.0420889	0.408172	0.508428	0.0104647	0.0416384	0.477955	0.574562	0	0.0290288	0.223051	0.694973	0.548479	0.244793
ClusterCA2-4_neurons	0.0296074	1.18953	1.39237	0.0127099	0.278904	1.317	1.55104	0.00182757	0.0182513	0.51912	1.67719	1.51148	0.556247
ClusterCA_neurons	0.0285678	1.07401	1.26033	0.0107256	0.0666651	1.19166	1.40525	0.00271306	0.0165944	0.476565	1.53159	1.36756	0.51161
ClusterEndothelial	0.0104647	0.000888834	0.000565169	0.00334421	0.0103527	0	0.00191527	0	0.00721752	0	0.00225354	0	0
ClusterEpendymal	0.0416384	0.00425226	0.10819	0.0103527	0.0411926	0.0467836	0.136403	0	0.028718	0	0.323963	0.0688396	0
ClusterGABA_neurons	0.00666786	0.907738	1.12397	0.000627116	0.247814	1.05608	1.27069	0.00369396	0.00364586	0.495853	1.53421	1.21304	0.544164
ClusterImmature	0.0389564	1.22092	1.41398	0.0148579	0.0894684	1.33892	1.5714	0.00327639	0.0226604	0.513245	1.6658	1.53634	0.54735
ClusterMicroglia	0	0	0	0	0	0	0	0	0	0	0	0	0
ClusterNeural Stem	0.0290288	0.312097	0.388528	0.00721752	0.028718	0.36502	0.4396	0	0.0200212	0.170347	0.5317	0.41888	0.186952
ClusterNeuroblast	0.0111921	0.409102	0.470447	0.00547512	0.0229953	0.445662	0.522377	0	0.00668783	0.0256449	0.543201	0.51102	0.0238656
ClusterOPCs	0.00158531	0.476968	0.588854	0.000954891	0.174755	0.551433	0.720747	0.00177511	0.001752	0.257925	0.919681	0.686596	0.283055
ClustermGC	0.0263321	1.17293	1.37803	0.0119186	0.0601347	1.30308	1.53611	0	0.0165624	0.516508	1.67101	1.49541	0.554182
ClustermOli	0	0.320007	0.398607	0	0	0.374716	0.450456	0	0	0.174872	0.544858	0.430007	0.191918

## Sheet: ligand_abundance
Unnamed: 0	5HT_HTR1A	5HT_HTR1B	5HT_HTR1D	5HT_HTR1E	5HT_HTR1F	5HT_HTR2A	5HT_HTR2B	5HT_HTR2C	5HT_HTR3A	5HT_HTR3B	5HT_HTR3C	5HT_HTR3D	5HT_HTR3E	5HT_HTR4	5HT_HTR5A	5HT_HTR6	5HT_HTR7	5HT_SLC6A4	ADCYAP1_ADCYAP1R1	ADCYAP1_VIPR1	ADCYAP1_VIPR2	Ach_ACHE	Ach_CHRM1	Ach_CHRM2	Ach_CHRM3	Ach_CHRM4	Ach_CHRM5	Ach_CHRNA1	Ach_CHRNA10	Ach_CHRNA2	Ach_CHRNA3	Ach_CHRNA4	Ach_CHRNA5	Ach_CHRNA6	Ach_CHRNA7	Ach_CHRNA9	Ach_CHRNB1	Ach_CHRNB2	Ach_CHRNB3	Ach_CHRNB4	Ach_CHRND	Ach_CHRNE	Ach_CHRNG	CCK_CCKBR	CORT_SSTR1	CORT_SSTR2	CORT_SSTR3	CORT_SSTR4	CO_GUCY1A1
ClusterAstrocytes	0	0	0	0	0	0	0	0	0	0	0	0	0	0	0	0	0	0	0	0	0	0	0	0	0	0	0	0	0	0	0	0	0	0	0	0	0	0	0	0	0	0	0	0	0	0	0	0	0
ClusterCA2-4_neurons	0	0	0	0	0	0	0	0	0	0	0	0	0	0	0	0	0	0	0	0	0	0	0	0	0	0	0	0	0	0	0	0	0	0	0	0	0	0	0	0	0	0	0	0.0506259	0	0	0	0	0.00740731
ClusterCA_neurons	0	0	0	0	0	0	0	0	0	0	0	0	0	0	0	0	0	0	0	0	0	0	0	0	0	0	0	0	0	0	0	0	0	0	0	0	0	0	0	0	0	0	0	0.0322545	0	0	0	0	0.00589901
ClusterEndothelial	0	0	0	0	0	0	0	0	0	0	0	0	0	0	0	0	0	0	0	0	0	0	0	0	0	0	0	0	0	0	0	0	0	0	0	0	0	0	0	0	0	0	0	0	0	0	0	0	0
ClusterEpendymal	0	0	0	0	0	0	0	0	0	0	0	0	0	0	0	0	0	0	0	0	0	0	0	0	0	0	0	0	0	0	0	0	0	0	0	0	0	0	0	0	0	0	0	0	0	0	0	0	0
ClusterGABA_neurons	0	0	0	0	0	0	0	0	0	0	0	0	0	0	0	0	0	0	0	0	0	0	0	0	0	0	0	0	0	0	0	0	0	0	0	0	0	0	0	0	0	0	0	0.0903204	0	0	0	0	0.00516632
ClusterImmature	0	0	0	0	0	0	0	0	0	0	0	0	0	0	0	0	0	0	0	0	0	0	0	0	0	0	0	0	0	0	0	0	0	0	0	0	0	0	0	0	0	0	0	0.0151301	0	0	0	0	0.00676589
ClusterMicroglia	0	0	0	0	0	0	0	0	0	0	0	0	0	0	0	0	0	0	0	0	0	0	0	0	0	0	0	0	0	0	0	0	0	0	0	0	0	0	0	0	0	0	0	0	0	0	0	0	0
ClusterNeural Stem	0	0	0	0	0	0	0	0	0	0	0	0	0	0	0	0	0	0	0	0	0	0	0	0	0	0	0	0	0	0	0	0	0	0	0	0	0	0	0	0	0	0	0	0	0	0	0	0	0
ClusterNeuroblast	0	0	0	0	0	0	0	0	0	0	0	0	0	0	0	0	0	0	0	0	0	0	0	0	0	0	0	0	0	0	0	0	0	0	0	0	0	0	0	0	0	0	0	0.0462134	0	0	0	0	0
ClusterOPCs	0	0	0	0	0	0	0	0	0	0	0	0	0	0	0	0	0	0	0	0	0	0	0	0	0	0	0	0	0	0	0	0	0	0	0	0	0	0	0	0	0	0	0	0	0	0	0	0	0
ClustermGC	0	0	0	0	0	0	0	0	0	0	0	0	0	0	0	0	0	0	0	0	0	0	0	0	0	0	0	0	0	0	0	0	0	0	0	0	0	0	0	0	0	0	0	0	0	0	0	0	0.00639502
ClustermOli	0	0	0	0	0	0	0	0	0	0	0	0	0	0	0	0	0	0	0	0	0	0	0	0	0	0	0	0	0	0	0	0	0	0	0	0	0	0	0	0	0	0	0	0	0	0	0	0	0
[truncated: 141 more columns]

## Sheet: receptor_abundance
Unnamed: 0	5HT_HTR1A	5HT_HTR1B	5HT_HTR1D	5HT_HTR1E	5HT_HTR1F	5HT_HTR2A	5HT_HTR2B	5HT_HTR2C	5HT_HTR3A	5HT_HTR3B	5HT_HTR3C	5HT_HTR3D	5HT_HTR3E	5HT_HTR4	5HT_HTR5A	5HT_HTR6	5HT_HTR7	5HT_SLC6A4	ADCYAP1_ADCYAP1R1	ADCYAP1_VIPR1	ADCYAP1_VIPR2	Ach_ACHE	Ach_CHRM1	Ach_CHRM2	Ach_CHRM3	Ach_CHRM4	Ach_CHRM5	Ach_CHRNA1	Ach_CHRNA10	Ach_CHRNA2	Ach_CHRNA3	Ach_CHRNA4	Ach_CHRNA5	Ach_CHRNA6	Ach_CHRNA7	Ach_CHRNA9	Ach_CHRNB1	Ach_CHRNB2	Ach_CHRNB3	Ach_CHRNB4	Ach_CHRND	Ach_CHRNE	Ach_CHRNG	CCK_CCKBR	CORT_SSTR1	CORT_SSTR2	CORT_SSTR3	CORT_SSTR4	CO_GUCY1A1
ClusterAstrocytes	0	0	0	0	0	0	0	0	0	0	0	0	0	0	0	0	0	0	0.0224025	0	0	0	0	0	0	0	0	0	0	0	0	0	0	0	0	0	0	0	0	0	0	0	0	0	0	0	0	0	0
ClusterCA2-4_neurons	0	0	0	0.079195	0	0	0	0.030957	0	0	0	0	0	0.104725	0	0	0.0421318	0	0.00804673	0	0	0	0	0	0.367032	0	0	0	0	0	0	0	0	0	0.00662574	0	0	0	0	0	0	0	0	0	0	0.0153614	0	0	0.014301
ClusterCA_neurons	0	0	0	0.0798193	0	0.0480843	0	0	0	0	0	0	0	0.108518	0	0	0	0	0	0.00986592	0	0	0	0	0.353675	0	0	0	0	0	0	0	0	0	0	0	0	0	0	0	0	0	0	0	0	0.0191129	0	0	0.0157393
ClusterEndothelial	0	0	0	0	0	0	0	0	0	0	0	0	0	0	0	0	0	0	0	0	0	0	0	0	0	0	0	0	0	0	0	0	0	0	0	0	0	0	0	0	0	0	0	0	0	0	0	0	0.0198003
ClusterEpendymal	0	0	0	0	0	0	0	0.159913	0	0	0	0	0	0	0	0	0	0	0.0110683	0	0	0	0	0	0	0	0	0	0	0	0	0	0	0	0	0	0	0	0	0	0	0	0	0	0	0	0	0	0
ClusterGABA_neurons	0	0	0	0.0367369	0	0.0155791	0	0	0	0	0	0	0	0.0162472	0	0	0	0	0.0288517	0	0	0	0	0.0345221	0.295443	0	0	0	0	0	0	0	0	0	0.0140177	0	0	0	0	0	0	0	0	0	0	0	0	0	0.0273734
ClusterImmature	0	0	0	0.0801091	0	0	0	0	0	0	0	0	0	0.169324	0	0	0	0	0.0446706	0.0130213	0	0	0	0	0.0140524	0	0	0	0	0	0	0	0	0	0	0	0	0	0	0	0	0	0	0	0	0.0595988	0	0	0.072868
ClusterMicroglia	0	0	0	0	0	0	0	0	0	0	0	0	0	0	0	0	0	0	0	0	0	0	0	0	0	0	0	0	0	0	0	0	0	0	0	0	0	0	0	0	0	0	0	0	0	0	0	0	0
ClusterNeural Stem	0	0	0	0	0	0	0	0	0	0	0	0	0	0	0	0	0	0	0	0	0	0	0	0	0	0	0	0	0	0	0	0	0	0	0	0	0	0	0	0	0	0	0	0	0	0	0	0	0
ClusterNeuroblast	0	0	0	0	0	0	0	0	0	0	0	0	0	0	0	0	0	0	0	0	0	0	0	0	0	0	0	0	0	0	0	0	0	0	0	0	0	0	0	0	0	0	0	0	0	0	0	0	0
ClusterOPCs	0	0	0	0	0	0	0	0	0	0	0	0	0	0	0	0	0	0	0	0	0.0361964	0	0	0	0	0	0	0	0	0	0	0	0	0	0	0	0	0	0	0	0	0	0	0	0	0	0	0	0
ClustermGC	0	0	0	0.0870585	0	0	0	0	0	0	0	0	0	0.203772	0	0	0	0	0.0215325	0.0110111	0	0	0	0	0	0	0	0	0	0	0	0	0	0	0	0	0	0	0	0	0	0	0	0	0	0.0204988	0	0	0.0631092
ClustermOli	0	0	0	0	0	0	0	0	0	0	0	0	0	0	0	0	0	0	0	0	0	0	0	0	0	0	0	0	0	0	0	0	0	0	0	0	0	0	0	0	0	0	0	0	0	0	0	0	0
[truncated: 141 more columns]
