# Supplementary material for: A roadmap to human hippocampal neurogenesis in adulthood, aging and AD.
Source: Research Square preprint supplement (doi:10.21203/rs.3.rs-4469965/v1), 2024-05-30
Supplement: Supplementary file 5 [file 49f3602793f5ec64e9f99f84.xlsx]

## Sheet: motifs_neurogenic_be...ltered
Motif	Motif Name	Class	Family	1.YC_vs_0.HA_Immature.down : Log2 Odds Ratio	1.YC_vs_0.HA_Immature.down : QValue	1.YC_vs_0.HA_Immature.up : Log2 Odds Ratio	1.YC_vs_0.HA_Immature.up : QValue	1.YC_vs_0.HA_Neural-Stem.up : Log2 Odds Ratio	1.YC_vs_0.HA_Neural-Stem.up : QValue	3.AD_vs_0.HA_Immature.down : Log2 Odds Ratio	3.AD_vs_0.HA_Immature.down : QValue	3.AD_vs_0.HA_Immature.up : Log2 Odds Ratio	3.AD_vs_0.HA_Immature.up : QValue	3.AD_vs_1.YC_Immature.down : Log2 Odds Ratio	3.AD_vs_1.YC_Immature.down : QValue	3.AD_vs_1.YC_Immature.up : Log2 Odds Ratio	3.AD_vs_1.YC_Immature.up : QValue	3.AD_vs_1.YC_Neural-Stem.down : Log2 Odds Ratio	3.AD_vs_1.YC_Neural-Stem.down : QValue	3.AD_vs_1.YC_Neural-Stem.up : Log2 Odds Ratio	3.AD_vs_1.YC_Neural-Stem.up : QValue
MA0506.1	NRF1	Basic leucine zipper factors (bZIP)	Jun-related	0	1	0	1	0	1	1.0374	0	0	1	0.470832	7.69693e-192	0	1	1.38581	1.38338e-63	0	1
MA0470.1	E2F4	Fork headwinged helix factors	E2F	0	1	0	1	0	1	1.00752	0	0	1	0.463309	9.24646e-191	0	1	1.29691	4.24275e-56	0	1
MA1122.1	TFDP1	Fork headwinged helix factors	E2F	0	1	0	1	0	1	0.988449	0	0	1	0.449728	2.83251e-182	0	1	1.26095	2.00571e-53	0	1
MA0732.1	EGR3	C2H2 zinc finger factors	Three-zinc finger Kruppel-related	0	1	0	1	0	1	0.923851	0	0	1	0.398494	9.40831e-164	0	1	1.00103	5.12257e-36	0	1
MA0632.1	Tcfl5	Basic helix-loop-helix factors (bHLH)	PAS domain factors	0	1	0	1	0	1	1.05804	0	0	1	0.514518	2.49515e-136	0	1	1.45349	8.93874e-49	0	1
MA0527.1	ZBTB33	C2H2 zinc finger factors	Other factors with up to three adjacent zinc fingers	0	1	0	1	0	1	1.06079	0	0	1	0.516981	2.42655e-133	0	1	1.30698	5.96565e-37	0	1
MA0740.1	KLF14	C2H2 zinc finger factors	Three-zinc finger Kruppel-related	0	1	0	1	0	1	0.833761	0	0	1	0.359111	2.95085e-133	0	1	1.12406	2.227e-45	0	1
MA0062.2	Gabpa	Tryptophan cluster factors	Ets-related	0	1	0	1	0	1	0.626129	1.34482e-224	0	1	0.293948	4.85304e-65	0	1	1.04588	1.9865e-32	0	1
MA0765.1	ETV5	Tryptophan cluster factors	Ets-related	0	1	0	1	0	1	0.800091	1.80471e-210	0	1	0.389017	1.20455e-61	0	1	1.40559	5.50307e-38	0	1
MA0028.2	ELK1	Tryptophan cluster factors	Ets-related	0	1	0	1	0	1	0.730529	8.18405e-187	0	1	0.362569	5.328e-58	0	1	1.34704	5.96565e-37	0	1
MA0759.1	ELK3	Tryptophan cluster factors	Ets-related	0	1	0	1	0	1	0.671222	2.08927e-155	0	1	0.339886	6.74718e-51	0	1	1.2881	2.36937e-33	0	1
MA0761.1	ETV1	Tryptophan cluster factors	Ets-related	0	1	0	1	0	1	0.711531	7.23774e-157	0	1	0.352742	1.20284e-48	0	1	1.326	2.33203e-32	0	1
MA0764.1	ETV4	Tryptophan cluster factors	Ets-related	0	1	0	1	0	1	0.70406	1.58428e-154	0	1	0.349302	4.5184e-48	0	1	1.36402	1.05436e-34	0	1
MA0156.2	FEV	Tryptophan cluster factors	Ets-related	0	1	0	1	0	1	0.598972	2.12614e-116	0	1	0.305026	4.49032e-39	0	1	1.29798	7.62833e-33	0	1
MA0475.2	FLI1	Tryptophan cluster factors	Ets-related	0	1	0	1	0	1	0.520377	5.54148e-97	0	1	0.265193	3.42986e-33	0	1	1.10777	3.24115e-25	0	1
MA0763.1	ETV3	Tryptophan cluster factors	Ets-related	0	1	0	1	0	1	0.554408	1.08858e-98	0	1	0.280369	5.81173e-33	0	1	1.1913	5.42834e-27	0	1
MA0748.1	YY2	C2H2 zinc finger factors	More than 3 adjacent zinc fingers	0	1	0	1	0	1	0.647039	1.09219e-119	0	1	0.295081	1.17779e-31	0	1	1.25135	1.05309e-26	0	1
MA0474.2	ERG	Tryptophan cluster factors	Ets-related	0	1	0	1	0	1	0.466682	2.87821e-78	0	1	0.243627	1.99252e-28	0	1	1.03322	5.85023e-22	0	1
MA0615.1	Gmeb1	SAND domain factors	GMEB	0	1	0	1	0	1	0.766312	2.93789e-94	0	1	0.371559	2.25348e-27	0	1	1.31168	2.4757e-17	0	1
MA0024.3	E2F1	Fork headwinged helix factors	E2F	0	1	0	1	0	1	0.606119	2.36572e-65	0	1	0.291984	1.53142e-19	0	1	1.01293	4.65654e-11	0	1
MA0604.1	Atf1	Basic leucine zipper factors (bZIP)	CREB-related factors	0	1	0	1	0	1	0.498938	5.52348e-48	0	1	0.250951	4.35183e-16	0	1	1.08019	4.47812e-14	0	1
MA0609.1	Crem	Basic leucine zipper factors (bZIP)	CREB-related factors	0	1	0	1	0	1	0.525057	1.61875e-33	0	1	0.292244	1.02937e-13	0	1	1.08439	2.9973e-09	0	1
MA0502.1	NFYB	Heteromeric CCAAT-binding factors	Heteromeric CCAAT-binding	0	1	0	1	0	1	0.371108	9.29005e-56	0	1	0.146316	3.78724e-12	0	1	1.2765	2.37978e-39	0	1
MA0060.3	NFYA	Other alpha	NFY	0	1	0	1	0	1	0.291878	4.94398e-36	0	1	0.100023	1.31611e-06	0	1	1.13668	7.58398e-32	0	1
MA0718.1	RAX	Homeo domain factors	Paired-related HD factors	0	1	0	1	4.02759	3.05685e-06	0	1	0	1	0	1	0	1	0.950215	2.62568e-14	0	1
MA0894.1	HESX1	Homeo domain factors	Paired-related HD factors	0	1	0	1	3.60263	0.000132466	0	1	0	1	0	1	0	1	0.9626	9.06329e-14	0	1
MA0642.1	EN2	Homeo domain factors	NK	0	1	0	1	3.45804	0.000150702	0	1	0	1	0	1	0	1	1.15924	2.85106e-22	0	1
MA0644.1	ESX1	Homeo domain factors	Paired-related HD factors	0	1	0	1	3.48397	0.000150702	0	1	0	1	0	1	0	1	0.975608	4.52821e-15	0	1
MA0710.1	NOTO	Homeo domain factors	NK	0	1	0	1	3.42588	0.000150702	0	1	0	1	0	1	0	1	0.874524	2.50853e-12	0	1
MA0892.1	GSX1	Homeo domain factors	HOX	0	1	0	1	3.25814	0.000331957	0	1	0	1	0	1	0	1	0.841095	2.72452e-12	0	1
MA0912.1	Hoxd3	Homeo domain factors	HOX	0	1	0	1	3.13982	0.00055786	0	1	0	1	0	1	0	1	0	1	0	1
MA0699.1	LBX2	Homeo domain factors	NK	0	1	0	1	3.21849	0.000582776	0	1	0	1	0	1	0	1	1.12701	1.46761e-20	0	1
MA0662.1	MIXL1	Homeo domain factors	Paired-related HD factors	0	1	0	1	3.21883	0.000582776	0	1	0	1	0	1	0	1	0.953697	2.69162e-14	0	1
MA0890.1	GBX2	Homeo domain factors	HOX	0	1	0	1	3.17447	0.000659482	0	1	0	1	0	1	0	1	0.977314	2.48127e-15	0	1
MA0874.1	Arx	Homeo domain factors	Paired-related HD factors	0	1	0	1	3.30657	0.000735026	0	1	0	1	0	1	0	1	0.685068	4.01523e-06	0	1
MA0889.1	GBX1	Homeo domain factors	HOX	0	1	0	1	3.18526	0.00119547	0	1	0	1	0	1	0	1	0.986167	1.79242e-13	0	1
MA0854.1	Alx1	Homeo domain factors	Paired-related HD factors	0	1	0	1	3.15672	0.00126144	0	1	0	1	0	1	0	1	0.641732	8.62348e-06	0	1
MA0618.1	LBX1	Homeo domain factors	NK	0	1	0	1	2.95326	0.00146074	0	1	0	1	0	1	0	1	0.679494	4.68911e-08	0	1
MA0900.1	HOXA2	Homeo domain factors	HOX	0	1	0	1	3.04141	0.00186433	0	1	0	1	0	1	0	1	0.918328	1.99895e-12	0	1
MA0612.1	EMX1	Homeo domain factors	NK	0	1	0	1	3.0277	0.00186433	0	1	0	1	0	1	0	1	0.779619	5.3224e-09	0	1
MA0630.1	SHOX	Homeo domain factors	Paired-related HD factors	0	1	0	1	2.91982	0.00203437	0	1	0	1	0	1	0	1	1.08188	7.52857e-19	0	1
MA0654.1	ISX	Homeo domain factors	Paired-related HD factors	0	1	0	1	2.91982	0.00203437	0	1	0	1	0	1	0	1	1.08188	7.52857e-19	0	1
MA0701.1	LHX9	Homeo domain factors	HD-LIM	0	1	0	1	2.91982	0.00203437	0	1	0	1	0	1	0	1	1.08188	7.52857e-19	0	1
MA0716.1	PRRX1	Homeo domain factors	Paired-related HD factors	0	1	0	1	2.91982	0.00203437	0	1	0	1	0	1	0	1	1.08188	7.52857e-19	0	1
MA0717.1	RAX2	Homeo domain factors	Paired-related HD factors	0	1	0	1	2.91982	0.00203437	0	1	0	1	0	1	0	1	1.08188	7.52857e-19	0	1
MA0720.1	Shox2	Homeo domain factors	Paired-related HD factors	0	1	0	1	2.91982	0.00203437	0	1	0	1	0	1	0	1	1.08188	7.52857e-19	0	1
MA0721.1	UNCX	Homeo domain factors	Paired-related HD factors	0	1	0	1	2.91982	0.00203437	0	1	0	1	0	1	0	1	1.08188	7.52857e-19	0	1
MA0700.1	LHX2	Homeo domain factors	HD-LIM	0	1	0	1	2.92016	0.00203437	0	1	0	1	0	1	0	1	0.91444	3.4468e-13	0	1
MA0675.1	NKX6-2	Homeo domain factors	NK	0	1	0	1	2.72627	0.00251579	0	1	0	1	0	1	0	1	0.809711	8.79459e-13	0	1
MA0893.1	GSX2	Homeo domain factors	HOX	0	1	0	1	2.67848	0.00304637	0	1	0	1	0	1	0	1	0.937346	1.01244e-17	0	1
MA0780.1	PAX3	Paired box factors	Paired plus homeo domain	0	1	0	1	3.19085	0.00364798	0	1	0	1	0	1	0	1	0	1	0	1
MA0903.1	HOXB3	Homeo domain factors	HOX	0	1	0	1	2.67652	0.0050961	0	1	0	1	0	1	0	1	0.731148	2.67698e-09	0	1
MA0132.2	PDX1	Homeo domain factors	HOX	0	1	0	1	2.83498	0.0050961	0	1	0	1	0	1	0	1	0.476067	0.00135686	0	1
MA0680.1	PAX7	Paired box factors	Paired plus homeo domain	0	1	0	1	3.06858	0.0050961	0	1	0	1	0	1	0	1	0	1	0	1
MA0882.1	DLX6	Homeo domain factors	NK	0	1	0	1	2.81033	0.00539312	0	1	0	1	0	1	0	1	0.548432	0.000145643	0	1
MA0027.2	EN1	Homeo domain factors	NK	0	1	0	1	2.70982	0.0077683	0	1	0	1	0	1	0	1	0.800672	1.36755e-09	0	1

## Sheet: 1.YA_vs_0.NCI_Immature.down
Motif	Motif Name	Class	Family	Hits in list	Unhit in list	Hits in background	Unhit in background	Percent in list	Percent in background	Log2 Odds Ratio	PValue	QValue
MA0038.1	Gfi1	C2H2 zinc finger factors	More than 3 adjacent zinc fingers	9	7	23361	98166	0.5625	0.192229	2.43367	0.00109653	0.627214
MA0046.2	HNF1A	Homeo domain factors	POU domain factors	6	10	12146	109381	0.375	0.0999449	2.43381	0.00329117	0.759646
MA0483.1	Gfi1B	C2H2 zinc finger factors	More than 3 adjacent zinc fingers	10	6	33868	87659	0.625	0.278687	2.10891	0.00398416	0.759646
MA1119.1	SIX2	Homeo domain factors	HD-SINE	7	9	21253	100274	0.4375	0.174883	1.87562	0.0131057	1
MA1122.1	TFDP1	Fork headwinged helix factors	E2F	0	16	29482	92045	0	0.242596	-inf	0.017766	1
MA0470.1	E2F4	Fork headwinged helix factors	E2F	0	16	28741	92786	0	0.236499	-inf	0.0183714	1
MA0705.1	Lhx8	Homeo domain factors	HD-LIM	4	12	8507	113020	0.25	0.0700009	2.14682	0.022123	1
MA0615.1	Gmeb1	SAND domain factors	GMEB	3	13	4706	116821	0.1875	0.0387239	2.51809	0.0222945	1
MA0798.1	RFX3	Fork headwinged helix factors	RFX-related factors	5	11	13684	107843	0.3125	0.1126	1.84084	0.027245	1
MA0100.3	MYB	Tryptophan cluster factors	MybSANT domain factors	6	10	19354	102173	0.375	0.159257	1.66333	0.0308941	1
MA0506.1	NRF1	Basic leucine zipper factors (bZIP)	Jun-related	0	16	27532	93995	0	0.22655	-inf	0.0315273	1
MA0137.3	STAT1	STAT domain factors	STAT factors	8	8	28656	92871	0.5	0.235799	1.69637	0.0327694	1
MA0799.1	RFX4	Fork headwinged helix factors	RFX-related factors	5	11	14406	107121	0.3125	0.118542	1.75687	0.0332436	1
MA0731.1	BCL6B	C2H2 zinc finger factors	More than 3 adjacent zinc fingers	6	10	19797	101730	0.375	0.162902	1.62441	0.0341748	1
MA0623.1	Neurog1	Basic helix-loop-helix factors (bHLH)	Tal-related	4	12	10640	110887	0.25	0.0875526	1.79653	0.045505	1
MA0604.1	Atf1	Basic leucine zipper factors (bZIP)	CREB-related factors	3	13	6247	115280	0.1875	0.0514042	2.09035	0.04605	1
MA0658.1	LHX6	Homeo domain factors	HD-LIM	3	13	6533	114994	0.1875	0.0537576	2.02224	0.0514674	1
MA0144.2	STAT3	STAT domain factors	STAT factors	9	7	37413	84114	0.5625	0.307858	1.53136	0.0528472	1
MA0734.1	GLI2	C2H2 zinc finger factors	More than 3 adjacent zinc fingers	0	16	22672	98855	0	0.186559	-inf	0.0552595	1
MA0066.1	PPARG	Nuclear receptors with C4 zinc fingers	Thyroid hormone receptor-related factors (NR1)	0	16	22602	98925	0	0.185983	-inf	0.055377	1
MA0645.1	ETV6	Tryptophan cluster factors	Ets-related	0	16	22372	99155	0	0.184091	-inf	0.0558203	1
MA0679.1	ONECUT1	Homeo domain factors	HD-CUT	3	13	7081	114446	0.1875	0.0582669	1.89901	0.0627024	1
MA0103.3	ZEB1	Homeo domain factors	HD-ZF factors	2	14	45129	76398	0.125	0.37135	-2.04786	0.0660643	1
MA0697.1	ZIC3	C2H2 zinc finger factors	More than 3 adjacent zinc fingers	2	14	43550	77977	0.125	0.358357	-1.96696	0.0662022	1
MA0516.1	SP2	C2H2 zinc finger factors	Three-zinc finger Kruppel-related	6	10	76138	45389	0.375	0.626511	-1.48323	0.0663474	1
MA0600.2	RFX2	Fork headwinged helix factors	RFX-related factors	4	12	12037	109490	0.25	0.0990479	1.6002	0.0664918	1
MA0696.1	ZIC1	C2H2 zinc finger factors	More than 3 adjacent zinc fingers	2	14	42105	79422	0.125	0.346466	-1.89179	0.0690621	1
MA0751.1	ZIC4	C2H2 zinc finger factors	More than 3 adjacent zinc fingers	2	14	41770	79757	0.125	0.34371	-1.87419	0.0701033	1
MA0901.1	HOXB13	Homeo domain factors	HOX	5	11	17998	103529	0.3125	0.148099	1.38658	0.0756053	1
MA1420.1	IRF5	Tryptophan cluster factors	Interferon-regulatory factors	4	12	12642	108885	0.25	0.104026	1.52152	0.0769905	1
MA0139.1	CTCF	C2H2 zinc finger factors	More than 3 adjacent zinc fingers	4	12	59611	61916	0.25	0.490517	-1.53034	0.0776385	1
MA0106.3	TP53	p53 domain factors	p53-related factors	4	12	12721	108806	0.25	0.104676	1.51148	0.0784236	1
MA0804.1	TBX19	T-Box factors	Brachyury-related factors	3	13	7892	113635	0.1875	0.0649403	1.73236	0.0813148	1
MA0146.2	Zfx	C2H2 zinc finger factors	More than 3 adjacent zinc fingers	4	12	58000	63527	0.25	0.47726	-1.45355	0.0816362	1
MA0808.1	TEAD3	TEA domain factors	TEF-1-related factors	5	11	18485	103042	0.3125	0.152106	1.34128	0.0830311	1
MA0879.1	Dlx1	Homeo domain factors	NK	3	13	8082	113445	0.1875	0.0665037	1.69563	0.0860034	1
MA0650.1	HOXA13	Homeo domain factors	HOX	5	11	18758	102769	0.3125	0.154353	1.31624	0.0873721	1
MA0485.1	Hoxc9	Homeo domain factors	HOX	4	12	13211	108316	0.25	0.108708	1.45046	0.0876303	1
MA0014.3	PAX5	Paired box factors	Paired domain only	0	16	21293	100234	0	0.175212	-inf	0.0928234	1
MA0112.3	ESR1	Nuclear receptors with C4 zinc fingers	Steroid hormone receptors (NR3)	0	16	21610	99917	0	0.177821	-inf	0.0936346	1
MA0758.1	E2F7	Fork headwinged helix factors	E2F	4	12	13556	107971	0.25	0.111547	1.40866	0.094437	1
MA0902.1	HOXB2	Homeo domain factors	HOX	3	13	8657	112870	0.1875	0.0712352	1.58915	0.100913	1
MA0638.1	CREB3	Basic leucine zipper factors (bZIP)	CREB-related factors	3	13	8803	112724	0.1875	0.0724366	1.56316	0.104865	1
MA0510.2	RFX5	Fork headwinged helix factors	RFX-related factors	4	12	14267	107260	0.25	0.117398	1.32529	0.109291	1
MA0158.1	HOXA5	Homeo domain factors	HOX	3	13	8983	112544	0.1875	0.0739177	1.53171	0.109827	1
MA0003.3	TFAP2A	Basic helix-span-helix factors (bHSH)	AP-2	8	8	37746	83781	0.5	0.310598	1.15031	0.110365	1
MA0756.1	ONECUT2	Homeo domain factors	HD-CUT	3	13	9052	112475	0.1875	0.0744855	1.51983	0.111754	1
MA0732.1	EGR3	C2H2 zinc finger factors	Three-zinc finger Kruppel-related	2	14	38698	82829	0.125	0.318431	-1.70941	0.112769	1
MA0811.1	TFAP2B	Basic helix-span-helix factors (bHSH)	AP-2	2	14	38489	83038	0.125	0.316712	-1.69796	0.113536	1
MA0153.2	HNF1B	Homeo domain factors	POU domain factors	3	13	9186	112341	0.1875	0.0755881	1.49672	0.115538	1
MA0468.1	DUX4	Homeo domain factors	Paired-related HD factors	4	12	14622	106905	0.25	0.120319	1.28512	0.117113	1
MA0692.1	TFEB	Basic helix-loop-helix factors (bHLH)	bHLH-ZIP	4	12	14752	106775	0.25	0.121389	1.27061	0.120044	1
MA0138.2	REST	C2H2 zinc finger factors	Factors with multiple dispersed zinc fingers	9	7	44301	77226	0.5625	0.364536	1.16433	0.12018	1
MA0783.1	PKNOX2	Homeo domain factors	TALE-type homeo domain factors	6	10	25625	95902	0.375	0.210858	1.16704	0.123464	1
MA0599.1	KLF5	C2H2 zinc finger factors	Three-zinc finger Kruppel-related	6	10	71516	50011	0.375	0.588478	-1.25299	0.124695	1
MA0079.3	SP1	C2H2 zinc finger factors	Three-zinc finger Kruppel-related	7	9	76011	45516	0.4375	0.625466	-1.10242	0.128652	1
MA0772.1	IRF7	Tryptophan cluster factors	Interferon-regulatory factors	6	10	26093	95434	0.375	0.214709	1.13388	0.12914	1
MA0827.1	OLIG3	Basic helix-loop-helix factors (bHLH)	Tal-related	3	13	9754	111773	0.1875	0.080262	1.40293	0.132143	1
MA1107.1	KLF9	C2H2 zinc finger factors	Three-zinc finger Kruppel-related	5	11	61899	59628	0.3125	0.509344	-1.19143	0.137031	1
MA0528.1	ZNF263	C2H2 zinc finger factors	More than 3 adjacent zinc fingers	10	6	94651	26876	0.625	0.778847	-1.07936	0.139585	1
MA0866.1	SOX21	High-mobility group (HMG) domain factors	SOX-related factors	4	12	15594	105933	0.25	0.128317	1.17911	0.139853	1
MA1102.1	CTCFL	C2H2 zinc finger factors	More than 3 adjacent zinc fingers	5	11	61315	60212	0.3125	0.504538	-1.16369	0.140074	1
MA0486.2	HSF1	Heat shock factors	HSF factors	4	12	15650	105877	0.25	0.128778	1.17318	0.14122	1
MA1150.1	RORB	Nuclear receptors with C4 zinc fingers	Thyroid hormone receptor-related factors (NR1)	4	12	15718	105809	0.25	0.129338	1.166	0.142889	1
MA1101.1	BACH2	Basic leucine zipper factors (bZIP)	Jun-related	7	9	30459	91068	0.4375	0.250636	1.21751	0.143279	1
MA0691.1	TFAP4	Basic helix-loop-helix factors (bHLH)	bHLH-ZIP	1	15	27315	94212	0.0625	0.224765	-2.12068	0.143912	1
MA0111.1	Spz1	Basic helix-loop-helix factors (bHLH)		1	15	27231	94296	0.0625	0.224074	-2.11495	0.144255	1
MA0069.1	PAX6	Paired box factors	Paired plus homeo domain	3	13	10160	111367	0.1875	0.0836028	1.33886	0.144543	1
MA0154.3	EBF1	Rel homology region (RHR) factors	Early B-Cell Factor-related factors	7	9	31101	90426	0.4375	0.255918	1.17721	0.145962	1
MA0671.1	NFIX	SMADNF-1 DNA-binding domain factors	Nuclear factor 1	7	9	31188	90339	0.4375	0.256634	1.1718	0.146395	1
MA0135.1	Lhx3	Homeo domain factors	HD-LIM	4	12	15898	105629	0.25	0.130819	1.14711	0.147346	1
MA1105.1	GRHL2	Grainyhead domain factors	Grainyhead-related factors	4	12	16033	105494	0.25	0.13193	1.13307	0.150729	1
MA0628.1	POU6F1	Homeo domain factors	POU domain factors	2	14	5263	116264	0.125	0.0433072	1.65798	0.150934	1
MA0673.1	NKX2-8	Homeo domain factors	NK	0	16	17363	104164	0	0.142874	-inf	0.151345	1
MA0646.1	GCM1	GCM domain factors	GCM	0	16	18575	102952	0	0.152847	-inf	0.154754	1
MA0635.1	BARHL2	Homeo domain factors	NK	2	14	5392	116135	0.125	0.0443687	1.62145	0.156896	1
MA0784.1	POU1F1	Homeo domain factors	POU domain factors	5	11	19647	101880	0.3125	0.161668	1.23697	0.161876	1
MA0621.1	mix-a	Homeo domain factors	Paired-related HD factors	3	13	10719	110808	0.1875	0.0882026	1.25441	0.162281	1
MA0680.1	PAX7	Paired box factors	Paired plus homeo domain	2	14	5531	115996	0.125	0.0455125	1.583	0.163377	1
MA1137.1	FOSL1::JUNB	Basic leucine zipper factors (bZIP)::Basic leucine zipper factors (bZIP)	Fos-related::Jun-related	5	11	19841	101686	0.3125	0.163264	1.22005	0.163544	1
MA0660.1	MEF2B	MADS box factors	Regulators of differentiation	5	11	20107	101420	0.3125	0.165453	1.19706	0.166017	1
MA0524.2	TFAP2C	Basic helix-span-helix factors (bHSH)	AP-2	2	14	37936	83591	0.125	0.312161	-1.66749	0.174057	1
MA0119.1	NFIC::TLX1	SMADNF-1 DNA-binding domain factors::Homeo domain factors	Nuclear factor 1::NK	2	14	35167	86360	0.125	0.289376	-1.5111	0.177337	1
MA0782.1	PKNOX1	Homeo domain factors	TALE-type homeo domain factors	5	11	21401	100126	0.3125	0.176101	1.08857	0.180949	1
MA0809.1	TEAD4	TEA domain factors	TEF-1-related factors	5	11	21791	99736	0.3125	0.17931	1.0569	0.186345	1
MA0713.1	PHOX2A	Homeo domain factors	Paired-related HD factors	3	13	11453	110074	0.1875	0.0942424	1.14916	0.186623	1
MA0685.1	SP4	C2H2 zinc finger factors	Three-zinc finger Kruppel-related	3	13	45188	76339	0.1875	0.371835	-1.35898	0.194367	1
MA1109.1	NEUROD1	Basic helix-loop-helix factors (bHLH)	Tal-related	9	7	46310	75217	0.5625	0.381068	1.06232	0.196038	1
MA0715.1	PROP1	Homeo domain factors	Paired-related HD factors	3	13	11864	109663	0.1875	0.0976244	1.09293	0.200715	1
MA0851.1	Foxj3	Fork headwinged helix factors	FOX	5	11	22730	98797	0.3125	0.187037	0.982429	0.200915	1
MA0884.1	DUXA	Homeo domain factors	Paired-related HD factors	3	13	11945	109582	0.1875	0.0982909	1.08204	0.203528	1
MA1124.1	ZNF24	C2H2 zinc finger factors	More than 3 adjacent zinc fingers	5	11	23118	98409	0.3125	0.190229	0.952183	0.207552	1
MA0511.2	RUNX2	Runt domain factors	Runt-related factors	3	13	12072	109455	0.1875	0.099336	1.06512	0.207961	1
MA0507.1	POU2F2	Homeo domain factors	POU domain factors	5	11	23147	98380	0.3125	0.190468	0.949951	0.208062	1
MA0886.1	EMX2	Homeo domain factors	NK	2	14	6496	115031	0.125	0.0534531	1.33894	0.209668	1
MA0746.1	SP3	C2H2 zinc finger factors	Three-zinc finger Kruppel-related	5	11	59929	61598	0.3125	0.493133	-1.09786	0.210779	1
MA0897.1	Hmx2	Homeo domain factors	NK	3	13	12327	109200	0.1875	0.101434	1.0316	0.21694	1
MA0870.1	Sox1	High-mobility group (HMG) domain factors	SOX-related factors	3	13	12341	109186	0.1875	0.101549	1.02978	0.217436	1
MA0523.1	TCF7L2	High-mobility group (HMG) domain factors	TCF-7-related factors	1	15	24903	96624	0.0625	0.204917	-1.95083	0.220701	1
MA0162.3	EGR1	C2H2 zinc finger factors	Three-zinc finger Kruppel-related	1	15	26276	95251	0.0625	0.216215	-2.0489	0.220955	1
MA0860.1	Rarg	Nuclear receptors with C4 zinc fingers	Thyroid hormone receptor-related factors (NR1)	1	15	24554	96973	0.0625	0.202046	-1.92527	0.221558	1
MA0818.1	BHLHE22	Basic helix-loop-helix factors (bHLH)	Tal-related	2	14	6883	114644	0.125	0.0566376	1.2507	0.228707	1
MA0795.1	SMAD3	SMADNF-1 DNA-binding domain factors	SMAD factors	2	14	6988	114539	0.125	0.0575016	1.22749	0.233905	1
MA0159.1	RARA::RXRA	Nuclear receptors with C4 zinc fingers::Nuclear receptors with C4 zinc fingers	Thyroid hormone receptor-related factors (NR1)::RXR-related receptors (NR2)	6	10	28740	92787	0.375	0.236491	0.953804	0.23504	1
MA0152.1	NFATC2	Rel homology region (RHR) factors	NFAT-related factors	6	10	29451	92076	0.375	0.242341	0.907477	0.242078	1
MA0031.1	FOXD1	Fork headwinged helix factors	FOX	3	13	13065	108462	0.1875	0.107507	0.937999	0.243461	1
MA0042.2	FOXI1	Fork headwinged helix factors	FOX	3	13	13083	108444	0.1875	0.107655	0.935776	0.244116	1
MA0033.2	FOXL1	Fork headwinged helix factors	FOX	3	13	13083	108444	0.1875	0.107655	0.935776	0.244116	1
MA0847.1	FOXD2	Fork headwinged helix factors	FOX	3	13	13083	108444	0.1875	0.107655	0.935776	0.244116	1
MA0848.1	FOXO4	Fork headwinged helix factors	FOX	3	13	13083	108444	0.1875	0.107655	0.935776	0.244116	1
MA0849.1	FOXO6	Fork headwinged helix factors	FOX	3	13	13083	108444	0.1875	0.107655	0.935776	0.244116	1
MA0850.1	FOXP3	Fork headwinged helix factors	FOX	3	13	13083	108444	0.1875	0.107655	0.935776	0.244116	1
MA0072.1	RORA	Nuclear receptors with C4 zinc fingers	Thyroid hormone receptor-related factors (NR1)	0	16	14702	106825	0	0.120977	-inf	0.2459	1
MA1155.1	ZSCAN4	C2H2 zinc finger factors	More than 3 adjacent zinc fingers	6	10	29883	91644	0.375	0.245896	0.8797	0.246956	1
MA0029.1	Mecom	C2H2 zinc finger factors	Factors with multiple dispersed zinc fingers	0	16	15465	106062	0	0.127256	-inf	0.24994	1
MA0888.1	EVX2	Homeo domain factors	HOX	2	14	7315	114212	0.125	0.0601924	1.1573	0.25016	1
MA1147.1	NR4A2::RXRA	Nuclear receptors with C4 zinc fingers::Nuclear receptors with C4 zinc fingers	NGFI-B-related receptors (NR4)::RXR-related receptors (NR2)	0	16	15503	106024	0	0.127568	-inf	0.250209	1
MA0887.1	EVX1	Homeo domain factors	HOX	2	14	7372	114155	0.125	0.0606614	1.14541	0.253002	1
MA0605.1	Atf3	Basic leucine zipper factors (bZIP)	Fos-related	2	14	7373	114154	0.125	0.0606696	1.1452	0.253052	1
MA0817.1	BHLHE23	Basic helix-loop-helix factors (bHLH)	Tal-related	2	14	7534	113993	0.125	0.0619945	1.11195	0.261091	1
MA0059.1	MAX::MYC	Basic helix-loop-helix factors (bHLH)::Basic helix-loop-helix factors (bHLH)	bHLH-ZIP::bHLH-ZIP	4	12	16642	104885	0.25	0.136941	1.07095	0.261128	1
MA0789.1	POU3F4	Homeo domain factors	POU domain factors	4	12	16699	104828	0.25	0.13741	1.06523	0.261808	1
MA0698.1	ZBTB18	C2H2 zinc finger factors	More than 3 adjacent zinc fingers	2	14	33611	87916	0.125	0.276572	-1.42004	0.263602	1
MA0081.1	SPIB	Tryptophan cluster factors	Ets-related	2	14	33328	88199	0.125	0.274244	-1.4032	0.263627	1
MA0652.1	IRF8	Tryptophan cluster factors	Interferon-regulatory factors	4	12	16952	104575	0.25	0.139492	1.04006	0.264974	1
MA0505.1	Nr5a2	Nuclear receptors with C4 zinc fingers	FTZF1related(NR5A)	2	14	34734	86793	0.125	0.285813	-1.48601	0.265543	1
MA1418.1	IRF3	Tryptophan cluster factors	Interferon-regulatory factors	2	14	31989	89538	0.125	0.263225	-1.32252	0.266627	1
MA0473.2	ELF1	Tryptophan cluster factors	Ets-related	4	12	17256	104271	0.25	0.141993	1.01024	0.269086	1
MA0826.1	OLIG1	Basic helix-loop-helix factors (bHLH)	Tal-related	2	14	7696	113831	0.125	0.0633275	1.07928	0.269192	1
MA0647.1	GRHL1	Grainyhead domain factors	Grainyhead-related factors	2	14	7821	113706	0.125	0.0643561	1.05445	0.27545	1
MA0909.1	HOXD13	Homeo domain factors	HOX	4	12	17735	103792	0.25	0.145935	0.964125	0.276219	1
MA0745.1	SNAI2	C2H2 zinc finger factors	More than 3 adjacent zinc fingers	7	9	36675	84852	0.4375	0.301785	0.84751	0.276305	1
MA0785.1	POU2F1	Homeo domain factors	POU domain factors	4	12	17987	103540	0.25	0.148008	0.940116	0.280277	1
MA0676.1	Nr2e1	Nuclear receptors with C4 zinc fingers	RXR-related receptors (NR2)	4	12	18088	103439	0.25	0.148839	0.93064	0.28196	1
MA0882.1	DLX6	Homeo domain factors	NK	2	14	8086	113441	0.125	0.0665367	1.00301	0.288726	1
MA0663.1	MLX	Basic helix-loop-helix factors (bHLH)	bHLH-ZIP	2	14	8104	113423	0.125	0.0666848	0.999578	0.289628	1
MA0858.1	Rarb	Nuclear receptors with C4 zinc fingers	Thyroid hormone receptor-related factors (NR1)	4	12	18616	102911	0.25	0.153184	0.881805	0.291269	1
MA0607.1	Bhlha15	Basic helix-loop-helix factors (bHLH)	Tal-related	4	12	18652	102875	0.25	0.15348	0.878517	0.291933	1
MA1138.1	FOSL2::JUNB	Basic leucine zipper factors (bZIP)::Basic leucine zipper factors (bZIP)	Fos-related::Jun-related	4	12	18823	102704	0.25	0.154887	0.862951	0.295141	1
MA0002.2	Runx1	Runt domain factors	Runt-related factors	3	13	39603	81924	0.1875	0.325878	-1.06679	0.295204	1
MA0797.1	TGIF2	Homeo domain factors	TALE-type homeo domain factors	4	12	18934	102593	0.25	0.155801	0.852908	0.297268	1
MA0787.1	POU3F2	Homeo domain factors	POU domain factors	4	12	18937	102590	0.25	0.155825	0.852638	0.297326	1
MA0678.1	OLIG2	Basic helix-loop-helix factors (bHLH)	Tal-related	2	14	8280	113247	0.125	0.068133	0.966357	0.298447	1
MA0865.1	E2F8	Fork headwinged helix factors	E2F	4	12	19230	102297	0.25	0.158236	0.82636	0.303102	1
MA1135.1	FOSB::JUNB	Basic leucine zipper factors (bZIP)::Basic leucine zipper factors (bZIP)	Fos-related::Jun-related	4	12	19412	102115	0.25	0.159734	0.810201	0.306803	1
MA0894.1	HESX1	Homeo domain factors	Paired-related HD factors	2	14	8461	113066	0.125	0.0696224	0.932879	0.307512	1
MA0612.1	EMX1	Homeo domain factors	NK	2	14	8527	113000	0.125	0.0701655	0.92084	0.310815	1
MA0661.1	MEOX1	Homeo domain factors	HOX	2	14	8563	112964	0.125	0.0704617	0.91431	0.312616	1
MA1142.1	FOSL1::JUND	Basic leucine zipper factors (bZIP)::Basic leucine zipper factors (bZIP)	Fos-related::Jun-related	4	12	19707	101820	0.25	0.162161	0.784267	0.312981	1
MA0099.3	FOS::JUN	Basic leucine zipper factors (bZIP)::Basic leucine zipper factors (bZIP)	Fos-related::Jun-related	4	12	19739	101788	0.25	0.162425	0.781473	0.313664	1
MA0027.2	EN1	Homeo domain factors	NK	2	14	8628	112899	0.125	0.0709966	0.902421	0.315867	1
MA0796.1	TGIF1	Homeo domain factors	TALE-type homeo domain factors	4	12	19897	101630	0.25	0.163725	0.76773	0.317072	1
MA0471.1	E2F6	Fork headwinged helix factors	E2F	5	11	56010	65517	0.3125	0.460885	-0.91129	0.317338	1
MA1130.1	FOSL2::JUN	Basic leucine zipper factors (bZIP)::Basic leucine zipper factors (bZIP)	Fos-related::Jun-related	4	12	20119	101408	0.25	0.165552	0.748567	0.321958	1
MA0025.1	NFIL3	Basic leucine zipper factors (bZIP)	CEBP-related	2	14	8780	112747	0.125	0.0722473	0.875329	0.323462	1
MA0009.2	TBXT	T-Box factors	Brachyury-related factors	2	14	8932	112595	0.125	0.0734981	0.84865	0.331045	1
MA0051.1	IRF2	Tryptophan cluster factors	Interferon-regulatory factors	1	15	21829	99698	0.0625	0.179623	-1.71557	0.334318	1
MA0047.2	Foxa2	Fork headwinged helix factors	FOX	1	15	22416	99111	0.0625	0.184453	-1.76237	0.334351	1
MA0117.2	Mafb	Basic leucine zipper factors (bZIP)	Maf-related	4	12	20665	100862	0.25	0.170045	0.702147	0.334436	1
MA0062.2	Gabpa	Tryptophan cluster factors	Ets-related	1	15	23056	98471	0.0625	0.189719	-1.81233	0.335766	1
MA0148.3	FOXA1	Fork headwinged helix factors	FOX	1	15	23152	98375	0.0625	0.190509	-1.81973	0.336099	1
MA0794.1	PROX1	Homeo domain factors	HD-PROS factors	2	14	9047	112480	0.125	0.0744444	0.828719	0.336773	1
MA0488.1	JUN	Basic leucine zipper factors (bZIP)	Jun-related	1	15	20826	100701	0.0625	0.171369	-1.63327	0.337188	1
MA0700.1	LHX2	Homeo domain factors	HD-LIM	2	14	9137	112390	0.125	0.0751849	0.813283	0.34125	1
MA0093.2	USF1	Basic helix-loop-helix factors (bHLH)	bHLH-ZIP	5	11	24298	97229	0.3125	0.199939	0.863036	0.342421	1
MA0725.1	VSX1	Homeo domain factors	Paired-related HD factors	2	14	9237	112290	0.125	0.0760078	0.796294	0.346217	1
MA0726.1	VSX2	Homeo domain factors	Paired-related HD factors	2	14	9237	112290	0.125	0.0760078	0.796294	0.346217	1
MA0890.1	GBX2	Homeo domain factors	HOX	2	14	9321	112206	0.125	0.076699	0.782153	0.350382	1
MA0748.1	YY2	C2H2 zinc finger factors	More than 3 adjacent zinc fingers	2	14	9360	112167	0.125	0.0770199	0.775628	0.352314	1
MA0494.1	Nr1h3::Rxra	Nuclear receptors with C4 zinc fingers::Nuclear receptors with C4 zinc fingers	Thyroid hormone receptor-related factors (NR1)::RXR-related receptors (NR2)	5	11	26139	95388	0.3125	0.215088	0.730091	0.36079	1
MA0670.1	NFIA	SMADNF-1 DNA-binding domain factors	Nuclear factor 1	5	11	26325	95202	0.3125	0.216619	0.717047	0.363157	1
MA0125.1	Nobox	Homeo domain factors	Paired-related HD factors	2	14	9641	111886	0.125	0.0793322	0.729332	0.366193	1
MA0904.1	Hoxb5	Homeo domain factors	HOX	2	14	9659	111868	0.125	0.0794803	0.726409	0.367079	1
MA0593.1	FOXP2	Fork headwinged helix factors	FOX	5	11	27115	94412	0.3125	0.223119	0.662368	0.374158	1
MA0706.1	MEOX2	Homeo domain factors	HOX	2	14	10003	111524	0.125	0.0823109	0.671475	0.383947	1
MA0846.1	FOXC2	Fork headwinged helix factors	FOX	5	11	27780	93747	0.3125	0.228591	0.617216	0.384532	1
MA0686.1	SPDEF	Tryptophan cluster factors	Ets-related	0	16	10788	110739	0	0.0887704	-inf	0.390415	1
MA0829.1	Srebf1	Basic helix-loop-helix factors (bHLH)	bHLH-ZIP	0	16	10670	110857	0	0.0877994	-inf	0.390476	1
MA0714.1	PITX3	Homeo domain factors	Paired-related HD factors	0	16	11011	110516	0	0.0906054	-inf	0.390551	1
MA1126.1	FOS::JUN	Basic leucine zipper factors (bZIP)::Basic leucine zipper factors (bZIP)	Fos-related::Jun-related	0	16	10520	111007	0	0.0865651	-inf	0.390689	1
MA0765.1	ETV5	Tryptophan cluster factors	Ets-related	0	16	10479	111048	0	0.0862278	-inf	0.390774	1
MA1131.1	FOSL2::JUN	Basic leucine zipper factors (bZIP)::Basic leucine zipper factors (bZIP)	Fos-related::Jun-related	0	16	10415	111112	0	0.0857011	-inf	0.39093	1
MA0828.1	SREBF2	Basic helix-loop-helix factors (bHLH)	bHLH-ZIP	0	16	10318	111209	0	0.0849029	-inf	0.391222	1
MA0515.1	Sox6	High-mobility group (HMG) domain factors	SOX-related factors	6	10	31864	89663	0.375	0.262197	0.755612	0.391519	1
MA0891.1	GSC2	Homeo domain factors	Paired-related HD factors	0	16	10191	111336	0	0.0838579	-inf	0.391706	1
MA0070.1	PBX1	Homeo domain factors	TALE-type homeo domain factors	0	16	11449	110078	0	0.0942095	-inf	0.391736	1
MA0063.1	Nkx2-5	Homeo domain factors	NK	0	16	11514	110013	0	0.0947444	-inf	0.392011	1
MA0028.2	ELK1	Tryptophan cluster factors	Ets-related	0	16	11572	109955	0	0.0952216	-inf	0.392279	1
MA0609.1	Crem	Basic leucine zipper factors (bZIP)	CREB-related factors	1	15	3731	117796	0.0625	0.030701	1.07368	0.392871	1
MA0779.1	PAX1	Paired box factors	Paired domain only	0	16	11941	109586	0	0.098258	-inf	0.394433	1
MA0914.1	ISL2	Homeo domain factors	HD-LIM	0	16	12429	109098	0	0.102274	-inf	0.398428	1
MA0036.3	GATA2	Other C4 zinc finger-type factors	C4-GATA-related	0	16	12839	108688	0	0.105647	-inf	0.402724	1
MA0527.1	ZBTB33	C2H2 zinc finger factors	Other factors with up to three adjacent zinc fingers	0	16	12866	108661	0	0.105869	-inf	0.403035	1
MA0793.1	POU6F2	Homeo domain factors	POU domain factors	0	16	13021	108506	0	0.107145	-inf	0.404888	1
MA0594.1	Hoxa9	Homeo domain factors	HOX	3	13	13333	108194	0.1875	0.109712	0.905011	0.408987	1
MA0018.3	CREB1	Basic leucine zipper factors (bZIP)	CREB-related factors	3	13	13453	108074	0.1875	0.1107	0.890505	0.410662	1
MA0707.1	MNX1	Homeo domain factors	HOX	3	13	13476	108051	0.1875	0.110889	0.887738	0.41099	1
MA0757.1	ONECUT3	Homeo domain factors	HD-CUT	3	13	13630	107897	0.1875	0.112156	0.869309	0.413242	1
MA0871.1	TFEC	Basic helix-loop-helix factors (bHLH)	bHLH-ZIP	3	13	14372	107155	0.1875	0.118262	0.782877	0.425386	1
MA0614.1	Foxj2	Fork headwinged helix factors	FOX	3	13	14633	106894	0.1875	0.120409	0.753393	0.430127	1
MA0633.1	Twist2	Basic helix-loop-helix factors (bHLH)	Tal-related	3	13	14767	106760	0.1875	0.121512	0.738432	0.432648	1
MA0157.2	FOXO3	Fork headwinged helix factors	FOX	3	13	14943	106584	0.1875	0.12296	0.718958	0.436046	1
MA0517.1	STAT1::STAT2	STAT domain factors::STAT domain factors	STAT factors::STAT factors	4	12	45354	76173	0.25	0.373201	-0.836905	0.439666	1
MA0684.1	RUNX3	Runt domain factors	Runt-related factors	3	13	15153	106374	0.1875	0.124688	0.695978	0.440223	1
MA0810.1	TFAP2A	Basic helix-span-helix factors (bHSH)	AP-2	4	12	43944	77583	0.25	0.361599	-0.764881	0.441966	1
MA0613.1	FOXG1	Fork headwinged helix factors	FOX	3	13	15358	106169	0.1875	0.126375	0.673807	0.444423	1
MA0065.2	Pparg::Rxra	Nuclear receptors with C4 zinc fingers::Nuclear receptors with C4 zinc fingers	Thyroid hormone receptor-related factors (NR1)::RXR-related receptors (NR2)	5	11	53034	68493	0.3125	0.436397	-0.768451	0.450883	1
MA0767.1	GCM2	GCM domain factors	GCM	3	13	15729	105798	0.1875	0.129428	0.634324	0.452314	1
MA0649.1	HEY2	Basic helix-loop-helix factors (bHLH)	Hairy-related factors	3	13	15743	105784	0.1875	0.129543	0.632849	0.452619	1
MA0030.1	FOXF2	Fork headwinged helix factors	FOX	3	13	15985	105542	0.1875	0.131535	0.607537	0.457961	1
MA0050.2	IRF1	Tryptophan cluster factors	Interferon-regulatory factors	6	10	58658	62869	0.375	0.482675	-0.636934	0.458862	1
MA1118.1	SIX1	Homeo domain factors	HD-SINE	3	13	16068	105459	0.1875	0.132218	0.598931	0.459826	1
MA0771.1	HSF4	Heat shock factors	HSF factors	3	13	16540	104987	0.1875	0.136101	0.550692	0.470715	1
MA0078.1	Sox17	High-mobility group (HMG) domain factors	SOX-related factors	3	13	16568	104959	0.1875	0.136332	0.547867	0.471375	1
MA0792.1	POU5F1B	Homeo domain factors	POU domain factors	3	13	16768	104759	0.1875	0.137978	0.527805	0.476137	1
MA0068.2	PAX4	Paired box factors	Paired plus homeo domain	1	15	4951	116576	0.0625	0.0407399	0.650489	0.486024	1
MA0479.1	FOXH1	Fork headwinged helix factors	FOX	1	15	18920	102607	0.0625	0.155686	-1.46774	0.493718	1
MA0672.1	NKX2-3	Homeo domain factors	NK	1	15	19258	102269	0.0625	0.158467	-1.49805	0.494227	1
MA0592.2	Esrra	Nuclear receptors with C4 zinc fingers	Steroid hormone receptors (NR3)	1	15	19504	102023	0.0625	0.160491	-1.51983	0.494852	1
MA0689.1	TBX20	T-Box factors	TBX1-related factors	1	15	19579	101948	0.0625	0.161108	-1.52643	0.495084	1
MA1112.1	NR4A1	Nuclear receptors with C4 zinc fingers	NGFI-B-related receptors (NR4)	1	15	17792	103735	0.0625	0.146404	-1.36328	0.495093	1
MA0735.1	GLIS1	C2H2 zinc finger factors	More than 3 adjacent zinc fingers	1	15	17749	103778	0.0625	0.14605	-1.3592	0.495243	1
MA0845.1	FOXB1	Fork headwinged helix factors	FOX	1	15	19654	101873	0.0625	0.161725	-1.53301	0.495336	1
MA0899.1	HOXA10	Homeo domain factors	HOX	3	13	17560	103967	0.1875	0.144495	0.450277	0.495675	1
MA0780.1	PAX3	Paired box factors	Paired plus homeo domain	1	15	5100	116427	0.0625	0.041966	0.605863	0.496434	1
MA0141.3	ESRRB	Nuclear receptors with C4 zinc fingers	Steroid hormone receptors (NR3)	1	15	19934	101593	0.0625	0.164029	-1.55739	0.496443	1
MA1113.1	PBX2	Homeo domain factors	TALE-type homeo domain factors	4	12	21063	100464	0.25	0.17332	0.668924	0.503486	1
MA0090.2	TEAD1	TEA domain factors	TEF-1-related factors	4	12	21080	100447	0.25	0.173459	0.667516	0.503621	1
MA0491.1	JUND	Basic leucine zipper factors (bZIP)	Jun-related	4	12	21674	99853	0.25	0.178347	0.618869	0.508873	1
MA1128.1	FOSL1::JUN	Basic leucine zipper factors (bZIP)::Basic leucine zipper factors (bZIP)	Fos-related::Jun-related	4	12	21783	99744	0.25	0.179244	0.610057	0.509943	1
MA1141.1	FOS::JUND	Basic leucine zipper factors (bZIP)::Basic leucine zipper factors (bZIP)	Fos-related::Jun-related	4	12	21975	99552	0.25	0.180824	0.594617	0.511904	1
MA0477.1	FOSL1	Basic leucine zipper factors (bZIP)	Fos-related	4	12	21992	99535	0.25	0.180964	0.593255	0.512082	1
MA0843.1	TEF	Basic leucine zipper factors (bZIP)	CEBP-related	1	15	5355	116172	0.0625	0.0440643	0.532315	0.513793	1
MA0657.1	KLF13	C2H2 zinc finger factors	Three-zinc finger Kruppel-related	4	12	22517	99010	0.25	0.185284	0.55159	0.517947	1
MA0775.1	MEIS3	Homeo domain factors	TALE-type homeo domain factors	4	12	22573	98954	0.25	0.185745	0.54719	0.518613	1
MA0842.1	NRL	Basic leucine zipper factors (bZIP)	Maf-related	4	12	22656	98871	0.25	0.186428	0.540685	0.519613	1
MA0490.1	JUNB	Basic leucine zipper factors (bZIP)	Jun-related	4	12	22674	98853	0.25	0.186576	0.539276	0.519832	1
MA0651.1	HOXC11	Homeo domain factors	HOX	1	15	5451	116076	0.0625	0.0448542	0.50549	0.520181	1
MA0147.3	MYC	Basic helix-loop-helix factors (bHLH)	bHLH-ZIP	4	12	23063	98464	0.25	0.189777	0.509047	0.524749	1
MA1115.1	POU5F1	Homeo domain factors	POU domain factors	4	12	23571	97956	0.25	0.193957	0.470153	0.531672	1
MA0773.1	MEF2D	MADS box factors	Regulators of differentiation	4	12	23726	97801	0.25	0.195232	0.458413	0.533891	1
MA0136.2	ELF5	Tryptophan cluster factors	Ets-related	4	12	23862	97665	0.25	0.196351	0.448159	0.535878	1
MA0091.1	TAL1::TCF3	Basic helix-loop-helix factors (bHLH)::Basic helix-loop-helix factors (bHLH)	Tal-related::E2A	4	12	23893	97634	0.25	0.196607	0.445828	0.536336	1
MA0101.1	REL	Rel homology region (RHR) factors	NF-kappaB-related factors	4	12	24266	97261	0.25	0.199676	0.417958	0.541986	1
MA0520.1	Stat6	STAT domain factors	STAT factors	4	12	24584	96943	0.25	0.202292	0.39445	0.547002	1
MA0092.1	Hand1::Tcf3	Basic helix-loop-helix factors (bHLH)::Basic helix-loop-helix factors (bHLH)	Tal-related::E2A	2	14	26255	95272	0.125	0.216043	-0.947853	0.54774	1
MA0595.1	SREBF1	Basic helix-loop-helix factors (bHLH)	bHLH-ZIP	2	14	26898	94629	0.125	0.221334	-0.992522	0.548054	1
MA1148.1	PPARA::RXRA	Nuclear receptors with C4 zinc fingers::Nuclear receptors with C4 zinc fingers	Thyroid hormone receptor-related factors (NR1)::RXR-related receptors (NR2)	2	14	25851	95676	0.125	0.212718	-0.91938	0.548098	1
MA0088.2	ZNF143	C2H2 zinc finger factors	More than 3 adjacent zinc fingers	2	14	27227	94300	0.125	0.224041	-1.01508	0.548623	1
MA0107.1	RELA	Rel homology region (RHR) factors	NF-kappaB-related factors	2	14	27520	94007	0.125	0.226452	-1.03501	0.549358	1
MA0596.1	SREBF2	Basic helix-loop-helix factors (bHLH)	bHLH-ZIP	2	14	25194	96333	0.125	0.207312	-0.872374	0.54962	1
MA0908.1	HOXD11	Homeo domain factors	HOX	1	15	5937	115590	0.0625	0.0488533	0.376243	0.551332	1
MA0076.2	ELK4	Tryptophan cluster factors	Ets-related	2	14	28146	93381	0.125	0.231603	-1.07709	0.551626	1
MA0711.1	OTX1	Homeo domain factors	Paired-related HD factors	1	15	5996	115531	0.0625	0.0493388	0.36124	0.554982	1
MA0116.1	Znf423	C2H2 zinc finger factors	Factors with multiple dispersed zinc fingers	5	11	28980	92547	0.3125	0.238466	0.53762	0.556083	1
MA0480.1	Foxo1	Fork headwinged helix factors	FOX	5	11	30129	91398	0.3125	0.24792	0.463502	0.564667	1
MA0509.1	Rfx1	Fork headwinged helix factors	RFX-related factors	5	11	30340	91187	0.3125	0.249656	0.450099	0.566533	1
MA0519.1	Stat5a::Stat5b	STAT domain factors::STAT domain factors	STAT factors::STAT factors	5	11	30352	91175	0.3125	0.249755	0.449339	0.566642	1
MA0704.1	Lhx4	Homeo domain factors	HD-LIM	1	15	6231	115296	0.0625	0.0512726	0.30284	0.569246	1
MA0880.1	Dlx3	Homeo domain factors	NK	1	15	6301	115226	0.0625	0.0518486	0.285847	0.573411	1
MA0815.1	TFAP2C	Basic helix-span-helix factors (bHSH)	AP-2	3	13	33456	88071	0.1875	0.275297	-0.719125	0.580586	1
MA0041.1	Foxd3	Fork headwinged helix factors	FOX	5	11	31732	89795	0.3125	0.261111	0.363194	0.580881	1
MA0738.1	HIC2	C2H2 zinc finger factors	Factors with multiple dispersed zinc fingers	3	13	34977	86550	0.1875	0.287813	-0.808356	0.581095	1
MA0872.1	TFAP2A	Basic helix-span-helix factors (bHSH)	AP-2	3	13	35208	86319	0.1875	0.289713	-0.821701	0.581586	1
MA0812.1	TFAP2B	Basic helix-span-helix factors (bHSH)	AP-2	6	10	35575	85952	0.375	0.292733	0.535697	0.582591	1
MA1149.1	RARA::RXRG	Nuclear receptors with C4 zinc fingers::Nuclear receptors with C4 zinc fingers	Thyroid hormone receptor-related factors (NR1)::RXR-related receptors (NR2)	5	11	31946	89581	0.3125	0.262872	0.350064	0.583378	1
MA0665.1	MSC	Basic helix-loop-helix factors (bHLH)	Tal-related	3	13	32191	89336	0.1875	0.264888	-0.642829	0.58388	1
MA0724.1	VENTX	Homeo domain factors	NK	1	15	6647	114880	0.0625	0.0546957	0.204387	0.59345	1
MA0906.1	HOXC12	Homeo domain factors	HOX	1	15	6669	114858	0.0625	0.0548767	0.199344	0.594694	1
MA0733.1	EGR4	C2H2 zinc finger factors	Three-zinc finger Kruppel-related	4	12	40056	81471	0.25	0.329606	-0.56069	0.602826	1
MA0740.1	KLF14	C2H2 zinc finger factors	Three-zinc finger Kruppel-related	6	10	39032	82495	0.375	0.32118	0.342634	0.604047	1
MA0149.1	EWSR1-FLI1	Tryptophan cluster factors	Ets-related	9	7	75631	45896	0.5625	0.622339	-0.358012	0.615486	1
MA0155.1	INSM1	C2H2 zinc finger factors	Factors with multiple dispersed zinc fingers	5	11	46534	74993	0.3125	0.382911	-0.449029	0.618711	1
MA0874.1	Arx	Homeo domain factors	Paired-related HD factors	1	15	7116	114411	0.0625	0.0585549	0.100079	0.619206	1
MA0895.1	HMBOX1	Homeo domain factors	POU domain factors	1	15	7128	114399	0.0625	0.0586536	0.0974948	0.619845	1
MA0636.1	BHLHE41	Basic helix-loop-helix factors (bHLH)	Hairy-related factors	0	16	7687	113840	0	0.0632534	-inf	0.620191	1
MA0854.1	Alx1	Homeo domain factors	Paired-related HD factors	0	16	7845	113682	0	0.0645536	-inf	0.620376	1
MA0853.1	Alx4	Homeo domain factors	Paired-related HD factors	0	16	7268	114259	0	0.0598056	-inf	0.620551	1
MA0840.1	Creb5	Basic leucine zipper factors (bZIP)	CREB-related factors	0	16	7191	114336	0	0.059172	-inf	0.620758	1
MA0656.1	JDP2	Basic leucine zipper factors (bZIP)	Fos-related	0	16	8382	113145	0	0.0689723	-inf	0.622197	1
MA0631.1	Six3	Homeo domain factors	HD-SINE	0	16	8554	112973	0	0.0703877	-inf	0.623142	1
MA1127.1	FOSB::JUN	Basic leucine zipper factors (bZIP)::Basic leucine zipper factors (bZIP)	Fos-related::Jun-related	0	16	8896	112631	0	0.0732018	-inf	0.625498	1
MA0712.1	OTX2	Homeo domain factors	Paired-related HD factors	0	16	8924	112603	0	0.0734322	-inf	0.625718	1
MA0642.1	EN2	Homeo domain factors	NK	0	16	9285	112242	0	0.0764028	-inf	0.628888	1
MA0883.1	Dmbx1	Homeo domain factors	Paired-related HD factors	0	16	9434	112093	0	0.0776288	-inf	0.630371	1
MA0648.1	GSC	Homeo domain factors	Paired-related HD factors	0	16	9517	112010	0	0.0783118	-inf	0.631239	1
MA1145.1	FOSL2::JUND	Basic leucine zipper factors (bZIP)::Basic leucine zipper factors (bZIP)	Fos-related::Jun-related	0	16	9725	111802	0	0.0800234	-inf	0.63354	1
MA0761.1	ETV1	Tryptophan cluster factors	Ets-related	0	16	10066	111461	0	0.0828293	-inf	0.637677	1
MA1133.1	JUN::JUNB	Basic leucine zipper factors (bZIP)::Basic leucine zipper factors (bZIP)	Jun-related::Jun-related	0	16	10076	111451	0	0.0829116	-inf	0.637804	1
MA0764.1	ETV4	Tryptophan cluster factors	Ets-related	0	16	10162	111365	0	0.0836193	-inf	0.638918	1
MA0885.1	Dlx2	Homeo domain factors	NK	2	14	10367	111160	0.125	0.0853061	0.615194	0.641702	1
MA0892.1	GSX1	Homeo domain factors	HOX	2	14	10545	110982	0.125	0.0867708	0.588322	0.644207	1
MA0903.1	HOXB3	Homeo domain factors	HOX	2	14	10670	110857	0.125	0.0877994	0.569696	0.646024	1
MA0618.1	LBX1	Homeo domain factors	NK	2	14	10729	110798	0.125	0.0882849	0.560973	0.646898	1
MA0164.1	Nr2e3	Nuclear receptors with C4 zinc fingers	RXR-related receptors (NR2)	2	14	10824	110703	0.125	0.0890666	0.547018	0.648326	1
MA0681.1	Phox2b	Homeo domain factors	Paired-related HD factors	2	14	11042	110485	0.125	0.0908605	0.515408	0.651696	1
MA0912.1	Hoxd3	Homeo domain factors	HOX	2	14	11362	110165	0.125	0.0934936	0.47001	0.656862	1
MA0629.1	Rhox11	Homeo domain factors	Paired-related HD factors	2	14	11541	109986	0.125	0.0949666	0.445114	0.659855	1
MA0498.2	MEIS1	Homeo domain factors	TALE-type homeo domain factors	2	14	11620	109907	0.125	0.0956166	0.434236	0.661198	1
MA0626.1	Npas2	Basic helix-loop-helix factors (bHLH)	PAS domain factors	2	14	11856	109671	0.125	0.0975586	0.40213	0.665286	1
MA0825.1	MNT	Basic helix-loop-helix factors (bHLH)	bHLH-ZIP	2	14	11992	109535	0.125	0.0986777	0.383888	0.66769	1
MA0058.3	MAX	Basic helix-loop-helix factors (bHLH)	bHLH-ZIP	2	14	12297	109230	0.125	0.101187	0.343632	0.673197	1
MA0898.1	Hmx3	Homeo domain factors	NK	2	14	12474	109053	0.125	0.102644	0.320674	0.67646	1
MA0752.1	ZNF410	C2H2 zinc finger factors	More than 3 adjacent zinc fingers	2	14	12482	109045	0.125	0.10271	0.319644	0.676609	1
MA0893.1	GSX2	Homeo domain factors	HOX	2	14	12743	108784	0.125	0.104857	0.286331	0.681504	1
MA0622.1	Mlxip	Basic helix-loop-helix factors (bHLH)	bHLH-ZIP	2	14	12814	108713	0.125	0.105442	0.277373	0.682851	1
MA0461.2	Atoh1	Basic helix-loop-helix factors (bHLH)	Tal-related	2	14	12829	108698	0.125	0.105565	0.275486	0.683136	1
MA0833.1	ATF4	Basic leucine zipper factors (bZIP)	ATF-4-related factors	2	14	12849	108678	0.125	0.10573	0.272974	0.683517	1
MA0823.1	HEY1	Basic helix-loop-helix factors (bHLH)	Hairy-related factors	2	14	12961	108566	0.125	0.106651	0.258965	0.685658	1
MA0474.2	ERG	Tryptophan cluster factors	Ets-related	2	14	12972	108555	0.125	0.106742	0.257595	0.685869	1
MA0616.1	Hes2	Basic helix-loop-helix factors (bHLH)	Hairy-related factors	2	14	13342	108185	0.125	0.109786	0.212089	0.693039	1
MA0659.1	MAFG	Basic leucine zipper factors (bZIP)	Maf-related	2	14	13482	108045	0.125	0.110938	0.195154	0.695785	1
MA0839.1	CREB3L1	Basic leucine zipper factors (bZIP)	CREB-related factors	2	14	13636	107891	0.125	0.112206	0.176701	0.698823	1
MA1419.1	IRF4	Tryptophan cluster factors	Interferon-regulatory factors	2	14	14066	107461	0.125	0.115744	0.126219	0.70739	1
MA0669.1	NEUROG2	Basic helix-loop-helix factors (bHLH)	Tal-related	1	15	15128	106399	0.0625	0.124483	-1.09269	0.710843	1
MA1151.1	RORC	Nuclear receptors with C4 zinc fingers	Thyroid hormone receptor-related factors (NR1)	1	15	15340	106187	0.0625	0.126227	-1.11565	0.710868	1
MA0502.1	NFYB	Heteromeric CCAAT-binding factors	Heteromeric CCAAT-binding	1	15	15354	106173	0.0625	0.126342	-1.11716	0.710875	1
MA0007.3	Ar	Nuclear receptors with C4 zinc fingers	Steroid hormone receptors (NR3)	1	15	14925	106602	0.0625	0.122812	-1.07045	0.71094	1
MA0124.2	Nkx3-1	Homeo domain factors	NK	1	15	14696	106831	0.0625	0.120928	-1.04505	0.711195	1
MA1146.1	NR1H4::RXRA	Nuclear receptors with C4 zinc fingers::Nuclear receptors with C4 zinc fingers	Thyroid hormone receptor-related factors (NR1)::RXR-related receptors (NR2)	1	15	14614	106913	0.0625	0.120253	-1.03587	0.711325	1
MA1104.1	GATA6	Other C4 zinc finger-type factors	C4-GATA-related	1	15	14563	106964	0.0625	0.119833	-1.03014	0.711416	1
MA0719.1	RHOXF1	Homeo domain factors	Paired-related HD factors	1	15	14452	107075	0.0625	0.11892	-1.0176	0.711642	1
MA0077.1	SOX9	High-mobility group (HMG) domain factors	SOX-related factors	1	15	14302	107225	0.0625	0.117686	-1.00053	0.712007	1
MA0482.1	Gata4	Other C4 zinc finger-type factors	C4-GATA-related	1	15	16120	105407	0.0625	0.132645	-1.19784	0.712028	1
MA0060.3	NFYA	Other alpha	NFY	1	15	16336	105191	0.0625	0.134423	-1.22	0.712631	1
MA1110.1	NR1H4	Nuclear receptors with C4 zinc fingers	Thyroid hormone receptor-related factors (NR1)	1	15	16361	105166	0.0625	0.134629	-1.22255	0.712708	1
MA1153.1	Smad4	SMADNF-1 DNA-binding domain factors	SMAD factors	1	15	16545	104982	0.0625	0.136143	-1.24121	0.713324	1
MA0683.1	POU4F2	Homeo domain factors	POU domain factors	1	15	17007	104520	0.0625	0.139944	-1.28731	0.715228	1
MA0467.1	Crx	Homeo domain factors	Paired-related HD factors	1	15	17460	104067	0.0625	0.143672	-1.3315	0.717562	1
MA1132.1	JUN::JUNB	Basic leucine zipper factors (bZIP)::Basic leucine zipper factors (bZIP)	Jun-related::Jun-related	1	15	17491	104036	0.0625	0.143927	-1.33449	0.717738	1
MA0035.3	Gata1	Other C4 zinc finger-type factors	C4-GATA-related	1	15	17508	104019	0.0625	0.144067	-1.33613	0.717835	1
MA0040.1	Foxq1	Fork headwinged helix factors	FOX	3	13	17610	103917	0.1875	0.144906	0.445481	0.718444	1
MA1108.1	MXI1	Basic helix-loop-helix factors (bHLH)	bHLH-ZIP	3	13	17692	103835	0.1875	0.145581	0.43764	0.718939	1
MA0868.1	SOX8	High-mobility group (HMG) domain factors	SOX-related factors	3	13	17752	103775	0.1875	0.146075	0.431922	0.71931	1
MA0744.1	SCRT2	C2H2 zinc finger factors	More than 3 adjacent zinc fingers	3	13	17960	103567	0.1875	0.147786	0.412222	0.720652	1
MA0627.1	Pou2f3	Homeo domain factors	POU domain factors	3	13	18023	103504	0.1875	0.148304	0.406293	0.721075	1
MA1103.1	FOXK2	Fork headwinged helix factors	FOX	3	13	18280	103247	0.1875	0.150419	0.38228	0.722879	1
MA0841.1	NFE2	Basic leucine zipper factors (bZIP)	Jun-related	3	13	18538	102989	0.1875	0.152542	0.358451	0.724812	1
MA1134.1	FOS::JUNB	Basic leucine zipper factors (bZIP)::Basic leucine zipper factors (bZIP)	Fos-related::Jun-related	3	13	18737	102790	0.1875	0.15418	0.340257	0.726383	1
MA1144.1	FOSL2::JUND	Basic leucine zipper factors (bZIP)::Basic leucine zipper factors (bZIP)	Fos-related::Jun-related	3	13	18950	102577	0.1875	0.155932	0.32094	0.728138	1
MA0643.1	Esrrg	Nuclear receptors with C4 zinc fingers	Steroid hormone receptors (NR3)	3	13	19064	102463	0.1875	0.15687	0.310681	0.729107	1
MA0805.1	TBX1	T-Box factors	TBX1-related factors	3	13	19084	102443	0.1875	0.157035	0.308887	0.729279	1
MA0806.1	TBX4	T-Box factors	TBX2-related factors	3	13	19084	102443	0.1875	0.157035	0.308887	0.729279	1
MA0526.2	USF2	Basic helix-loop-helix factors (bHLH)	bHLH-ZIP	3	13	19295	102232	0.1875	0.158771	0.290046	0.731134	1
MA0786.1	POU3F1	Homeo domain factors	POU domain factors	3	13	19432	102095	0.1875	0.159899	0.277902	0.732375	1
MA0788.1	POU3F3	Homeo domain factors	POU domain factors	3	13	19495	102032	0.1875	0.160417	0.27234	0.732954	1
MA1120.1	SOX13	High-mobility group (HMG) domain factors	SOX-related factors	3	13	19501	102026	0.1875	0.160466	0.271812	0.73301	1
MA0688.1	TBX2	T-Box factors	TBX2-related factors	3	13	19667	101860	0.1875	0.161832	0.25723	0.734566	1
MA0619.1	LIN54	CRC domain		3	13	19979	101548	0.1875	0.1644	0.230091	0.737593	1
MA0856.1	RXRG	Nuclear receptors with C4 zinc fingers	RXR-related receptors (NR2)	3	13	20063	101464	0.1875	0.165091	0.222842	0.73843	1
MA0481.2	FOXP1	Fork headwinged helix factors	FOX	3	13	20339	101188	0.1875	0.167362	0.199194	0.741242	1
MA0512.2	Rxra	Nuclear receptors with C4 zinc fingers	RXR-related receptors (NR2)	3	13	20662	100865	0.1875	0.17002	0.171941	0.744648	1
MA0114.3	Hnf4a	Nuclear receptors with C4 zinc fingers	RXR-related receptors (NR2)	3	13	20958	100569	0.1875	0.172456	0.147171	0.74787	1
MA0778.1	NFKB2	Rel homology region (RHR) factors	NF-kappaB-related factors	2	14	22586	98941	0.125	0.185852	-0.676201	0.751766	1
MA0476.1	FOS	Basic leucine zipper factors (bZIP)	Fos-related	2	14	23002	98525	0.125	0.189275	-0.708608	0.751771	1
MA0032.2	FOXC1	Fork headwinged helix factors	FOX	2	14	22400	99127	0.125	0.184321	-0.661562	0.751863	1
MA0625.1	NFATC3	Rel homology region (RHR) factors	NFAT-related factors	2	14	23190	98337	0.125	0.190822	-0.723106	0.751872	1
MA0105.4	NFKB1	Rel homology region (RHR) factors	NF-kappaB-related factors	2	14	23198	98329	0.125	0.190888	-0.723721	0.751878	1
MA0489.1	JUN	Basic leucine zipper factors (bZIP)	Jun-related	2	14	23444	98083	0.125	0.192912	-0.742552	0.752105	1
MA0801.1	MGA	T-Box factors	TBX6-related factors	2	14	22035	99492	0.125	0.181318	-0.632559	0.752237	1
MA0677.1	Nr2f6	Nuclear receptors with C4 zinc fingers	RXR-related receptors (NR2)	2	14	23703	97824	0.125	0.195043	-0.762216	0.752455	1
MA0462.1	BATF::JUN	Basic leucine zipper factors (bZIP)::Basic leucine zipper factors (bZIP)	B-ATF-related factors::Jun-related	2	14	21751	99776	0.125	0.178981	-0.609733	0.752698	1
MA0729.1	RARA	Nuclear receptors with C4 zinc fingers	Thyroid hormone receptor-related factors (NR1)	2	14	21681	99846	0.125	0.178405	-0.604071	0.752835	1
MA1154.1	ZNF282	C2H2 zinc finger factors	More than 3 adjacent zinc fingers	2	14	24171	97356	0.125	0.198894	-0.797339	0.753365	1
MA0694.1	ZBTB7B	C2H2 zinc finger factors	More than 3 adjacent zinc fingers	2	14	24747	96780	0.125	0.203634	-0.839872	0.75496	1
MA0859.1	Rarg	Nuclear receptors with C4 zinc fingers	Thyroid hormone receptor-related factors (NR1)	4	12	25050	96477	0.25	0.206127	0.360408	0.756007	1
MA0142.1	Pou5f1::Sox2	Homeo domain factors::High-mobility group (HMG) domain factors	POU domain factors::SOX-related factors	4	12	25111	96416	0.25	0.206629	0.355987	0.756233	1
MA0730.1	RARA	Nuclear receptors with C4 zinc fingers	Thyroid hormone receptor-related factors (NR1)	4	12	25937	95590	0.25	0.213426	0.296883	0.759805	1
MA1121.1	TEAD2	TEA domain factors	TEF-1-related factors	4	12	26057	95470	0.25	0.214413	0.288411	0.760401	1
MA0150.2	Nfe2l2	Basic leucine zipper factors (bZIP)	Jun-related	4	12	27645	93882	0.25	0.22748	0.178896	0.76993	1
MA0774.1	MEIS2	Homeo domain factors	TALE-type homeo domain factors	4	12	27837	93690	0.25	0.22906	0.165954	0.771272	1
MA0687.1	SPIC	Tryptophan cluster factors	Ets-related	3	13	30231	91296	0.1875	0.24876	-0.520923	0.774801	1
MA0591.1	Bach1::Mafk	Basic leucine zipper factors (bZIP)::Basic leucine zipper factors (bZIP)	Jun-related::Maf-related	3	13	30566	90961	0.1875	0.251516	-0.542121	0.774808	1
MA0017.2	NR2F1	Nuclear receptors with C4 zinc fingers	RXR-related receptors (NR2)	3	13	30109	91418	0.1875	0.247756	-0.513164	0.774835	1
MA0478.1	FOSL2	Basic leucine zipper factors (bZIP)	Fos-related	3	13	30737	90790	0.1875	0.252923	-0.552882	0.774867	1
MA0518.1	Stat4	STAT domain factors	STAT factors	5	11	32969	88558	0.3125	0.27129	0.288055	0.778952	1
MA0463.1	Bcl6	C2H2 zinc finger factors	More than 3 adjacent zinc fingers	5	11	33596	87931	0.3125	0.276449	0.250536	0.781132	1
MA0820.1	FIGLA	Basic helix-loop-helix factors (bHLH)	Tal-related	5	11	33902	87625	0.3125	0.278967	0.232434	0.782347	1
MA0736.1	GLIS2	C2H2 zinc finger factors	More than 3 adjacent zinc fingers	5	11	34131	87396	0.3125	0.280851	0.218951	0.783319	1
MA0497.1	MEF2C	MADS box factors	Regulators of differentiation	5	11	35259	86268	0.3125	0.290133	0.153319	0.788845	1
MA0039.3	KLF4	C2H2 zinc finger factors	Three-zinc finger Kruppel-related	4	12	37811	83716	0.25	0.311133	-0.438318	0.788879	1
MA0484.1	HNF4G	Nuclear receptors with C4 zinc fingers	RXR-related receptors (NR2)	4	12	36341	85186	0.25	0.299036	-0.355911	0.790309	1
MA0750.2	ZBTB7A	C2H2 zinc finger factors	More than 3 adjacent zinc fingers	4	12	36047	85480	0.25	0.296617	-0.339226	0.790878	1
MA0258.2	ESR2	Nuclear receptors with C4 zinc fingers	Steroid hormone receptors (NR3)	4	12	35802	85725	0.25	0.294601	-0.325261	0.791425	1
MA0522.2	TCF3	Basic helix-loop-helix factors (bHLH)	E2A	6	10	41357	80170	0.375	0.340311	0.21795	0.794687	1
MA0830.1	TCF4	Basic helix-loop-helix factors (bHLH)	E2A	6	10	41782	79745	0.375	0.343808	0.195536	0.796191	1
MA0816.1	Ascl2	Basic helix-loop-helix factors (bHLH)	MyoDASC-related factors	5	11	45181	76346	0.3125	0.371777	-0.380664	0.797518	1
MA1116.1	RBPJ	Rel homology region (RHR) factors	CSL-related factors	7	9	46622	74905	0.4375	0.383635	0.32146	0.797959	1
MA0753.1	ZNF740	C2H2 zinc finger factors	Other factors with up to three adjacent zinc fingers	5	11	43749	77778	0.3125	0.359994	-0.30744	0.799016	1
MA0514.1	Sox3	High-mobility group (HMG) domain factors	SOX-related factors	6	10	42598	78929	0.375	0.350523	0.152798	0.799512	1
MA0499.1	Myod1	Basic helix-loop-helix factors (bHLH)	MyoDASC-related factors	6	10	51825	69702	0.375	0.426448	-0.309411	0.802907	1
MA0493.1	Klf1	C2H2 zinc finger factors	Three-zinc finger Kruppel-related	6	10	51671	69856	0.375	0.425181	-0.301933	0.803098	1
MA0500.1	Myog	Basic helix-loop-helix factors (bHLH)	MyoDASC-related factors	6	10	51386	70141	0.375	0.422836	-0.28808	0.803506	1
MA0741.1	KLF16	C2H2 zinc finger factors	Three-zinc finger Kruppel-related	7	9	59159	62368	0.4375	0.486797	-0.286358	0.8047	1
MA0521.1	Tcf12	Basic helix-loop-helix factors (bHLH)	E2A	6	10	50531	70996	0.375	0.415801	-0.24637	0.805152	1
MA0747.1	SP8	C2H2 zinc finger factors	Three-zinc finger Kruppel-related	8	8	56221	65306	0.5	0.462621	0.216102	0.806111	1
MA0073.1	RREB1	C2H2 zinc finger factors	Factors with multiple dispersed zinc fingers	7	9	58258	63269	0.4375	0.479383	-0.243524	0.806264	1
MA0095.2	YY1	C2H2 zinc finger factors	More than 3 adjacent zinc fingers	3	13	28388	93139	0.1875	0.233594	-0.401359	1	1
MA0601.1	Arid3b	ARID	ARID-related	2	14	14910	106617	0.125	0.122689	0.0307338	1	1
MA0606.1	NFAT5	Rel homology region (RHR) factors	NFAT-related factors	4	12	30331	91196	0.25	0.249582	0.00321497	1	1
MA0608.1	Creb3l2	Basic leucine zipper factors (bZIP)	CREB-related factors	1	15	9663	111864	0.0625	0.0795132	-0.373788	1	1
MA0644.1	ESX1	Homeo domain factors	Paired-related HD factors	1	15	9132	112395	0.0625	0.0751438	-0.285402	1	1
MA0682.1	Pitx1	Homeo domain factors	Paired-related HD factors	1	15	13531	107996	0.0625	0.111342	-0.910246	1	1
MA0075.2	Prrx2	Homeo domain factors	Paired-related HD factors	1	15	7567	113960	0.0625	0.062266	0.00577185	1	1
MA0708.1	MSX2	Homeo domain factors	NK	1	15	10887	110640	0.0625	0.089585	-0.561642	1	1
MA0709.1	Msx3	Homeo domain factors	NK	1	15	10887	110640	0.0625	0.089585	-0.561642	1	1
MA0710.1	NOTO	Homeo domain factors	NK	1	15	9478	112049	0.0625	0.0779909	-0.34351	1	1
MA0727.1	NR3C2	Nuclear receptors with C4 zinc fingers	Steroid hormone receptors (NR3)	1	15	12061	109466	0.0625	0.0992454	-0.724824	1	1
MA0742.1	Klf12	C2H2 zinc finger factors	Three-zinc finger Kruppel-related	5	11	38650	82877	0.3125	0.318036	-0.0370296	1	1
MA0754.1	CUX1	Homeo domain factors	HD-CUT	0	16	3838	117689	0	0.0315815	-inf	1	1
MA0755.1	CUX2	Homeo domain factors	HD-CUT	0	16	3524	118003	0	0.0289977	-inf	1	1
MA0469.2	E2F3	Fork headwinged helix factors	E2F	0	16	3612	117915	0	0.0297218	-inf	1	1
MA0768.1	LEF1	High-mobility group (HMG) domain factors	TCF-7-related factors	3	13	23316	98211	0.1875	0.191859	-0.0409204	1	1
MA0803.1	TBX15	T-Box factors	TBX1-related factors	3	13	23448	98079	0.1875	0.192945	-0.0510097	1	1
MA0814.1	TFAP2C	Basic helix-span-helix factors (bHSH)	AP-2	5	11	39688	81839	0.3125	0.326578	-0.0934158	1	1
MA0834.1	ATF7	Basic leucine zipper factors (bZIP)	Jun-related	0	16	6758	114769	0	0.055609	-inf	1	1
MA0861.1	TP73	p53 domain factors	p53-related factors	1	15	12772	108755	0.0625	0.105096	-0.816859	1	1
MA0896.1	Hmx1	Homeo domain factors	NK	1	15	11032	110495	0.0625	0.0907782	-0.582627	1	1
MA0910.1	Hoxd8	Homeo domain factors	HOX	1	15	13575	107952	0.0625	0.111704	-0.915518	1	1
MA0161.2	NFIC	SMADNF-1 DNA-binding domain factors	Nuclear factor 1	4	12	33122	88405	0.25	0.272548	-0.16862	1	1
MA1129.1	FOSL1::JUN	Basic leucine zipper factors (bZIP)::Basic leucine zipper factors (bZIP)	Fos-related::Jun-related	0	16	5729	115798	0	0.0471418	-inf	1	1
MA1143.1	FOSL1::JUND	Basic leucine zipper factors (bZIP)::Basic leucine zipper factors (bZIP)	Fos-related::Jun-related	1	15	7926	113601	0.0625	0.0652201	-0.0656521	1	1
MA1152.1	SOX15	High-mobility group (HMG) domain factors	SOX-related factors	4	12	28952	92575	0.25	0.238235	0.0920062	1	1
MA0019.1	Ddit3::Cebpa	Basic leucine zipper factors (bZIP)::Basic leucine zipper factors (bZIP)	CEBP-related::CEBP-related	2	14	15281	106246	0.125	0.125742	-0.00975731	1	1
MA0067.1	Pax2	Paired box factors	Paired domain only	1	15	7924	113603	0.0625	0.0652036	-0.0652626	1	1
MA0071.1	RORA	Nuclear receptors with C4 zinc fingers	Thyroid hormone receptor-related factors (NR1)	2	14	17623	103904	0.125	0.145013	-0.247628	1	1
MA0074.1	RXRA::VDR	Nuclear receptors with C4 zinc fingers::Nuclear receptors with C4 zinc fingers	RXR-related receptors (NR2)::Thyroid hormone receptor-related factors (NR1)	1	15	12868	108659	0.0625	0.105886	-0.828937	1	1
MA0084.1	SRY	High-mobility group (HMG) domain factors	SOX-related factors	2	14	16039	105488	0.125	0.131979	-0.0899431	1	1
MA0108.2	TBP	TATA-binding proteins	TBP-related factors	1	15	10171	111356	0.0625	0.0836933	-0.45429	1	1
MA0115.1	NR1H2::RXRA	Nuclear receptors with C4 zinc fingers::Nuclear receptors with C4 zinc fingers	Thyroid hormone receptor-related factors (NR1)::RXR-related receptors (NR2)	2	14	18228	103299	0.125	0.149991	-0.304754	1	1
MA0160.1	NR4A2	Nuclear receptors with C4 zinc fingers	NGFI-B-related receptors (NR4)	3	13	22290	99237	0.1875	0.183416	0.0390074	1	1
MA0163.1	PLAG1	C2H2 zinc finger factors	More than 3 adjacent zinc fingers	8	8	59092	62435	0.5	0.486246	0.0794256	1	1
MA0259.1	ARNT::HIF1A	Basic helix-loop-helix factors (bHLH)::Basic helix-loop-helix factors (bHLH)	PAS domain factors::PAS domain factors	1	15	11931	109596	0.0625	0.0981757	-0.707475	1	1
MA0504.1	NR2C2	Nuclear receptors with C4 zinc fingers	RXR-related receptors (NR2)	6	10	47023	74504	0.375	0.386935	-0.0730206	1	1
MA0501.1	MAF::NFE2	Basic leucine zipper factors (bZIP)::Basic leucine zipper factors (bZIP)	Maf-related::Jun-related	3	13	24804	96723	0.1875	0.204103	-0.152189	1	1
MA0492.1	JUND	Basic leucine zipper factors (bZIP)	Jun-related	2	14	17697	103830	0.125	0.145622	-0.254706	1	1
MA0465.1	CDX2	Homeo domain factors	HOX	2	14	18216	103311	0.125	0.149893	-0.303636	1	1
MA0102.3	CEBPA	Basic leucine zipper factors (bZIP)	CEBP-related	2	14	17928	103599	0.125	0.147523	-0.276629	1	1
MA0143.3	Sox2	High-mobility group (HMG) domain factors	SOX-related factors	3	13	25125	96402	0.1875	0.206744	-0.175536	1	1
MA0140.2	GATA1::TAL1	Other C4 zinc finger-type factors::Basic helix-loop-helix factors (bHLH)	C4-GATA-related::Tal-related	2	14	15066	106461	0.125	0.123972	0.0136024	1	1
MA0597.1	THAP1	C2CH THAP-type zinc finger factors	THAP-related factors	5	11	41929	79598	0.3125	0.345018	-0.212701	1	1
MA0602.1	Arid5a	ARID	ARID-related	1	15	11067	110460	0.0625	0.0910662	-0.587656	1	1
MA0603.1	Arntl	Basic helix-loop-helix factors (bHLH)	PAS domain factors	1	15	10448	111079	0.0625	0.0859727	-0.496659	1	1
MA0610.1	DMRT3	DM-type intertwined zinc finger factors	DMRT factors	1	15	10764	110763	0.0625	0.0885729	-0.543643	1	1
MA0611.1	Dux	Homeo domain factors	Paired-related HD factors	1	15	12939	108588	0.0625	0.10647	-0.837818	1	1
MA1099.1	Hes1	Basic helix-loop-helix factors (bHLH)	Hairy-related factors	2	14	16284	105243	0.125	0.133995	-0.115176	1	1
MA0624.1	NFATC1	Rel homology region (RHR) factors	NFAT-related factors	3	13	23568	97959	0.1875	0.193932	-0.0601453	1	1
MA0630.1	SHOX	Homeo domain factors	Paired-related HD factors	1	15	9139	112388	0.0625	0.0752014	-0.286598	1	1
MA0632.1	Tcfl5	Basic helix-loop-helix factors (bHLH)	PAS domain factors	1	15	13384	108143	0.0625	0.110132	-0.892525	1	1
MA0634.1	ALX3	Homeo domain factors	Paired-related HD factors	1	15	11346	110181	0.0625	0.093362	-0.627235	1	1
MA0639.1	DBP	Basic leucine zipper factors (bZIP)	CEBP-related	0	16	5153	116374	0	0.0424021	-inf	1	1
MA0598.2	EHF	Tryptophan cluster factors	Ets-related	2	14	18273	103254	0.125	0.150362	-0.30894	1	1
MA0640.1	ELF3	Tryptophan cluster factors	Ets-related	2	14	20021	101506	0.125	0.164745	-0.46537	1	1
MA0641.1	ELF4	Tryptophan cluster factors	Ets-related	2	14	18707	102820	0.125	0.153933	-0.348881	1	1
MA0475.2	FLI1	Tryptophan cluster factors	Ets-related	1	15	12731	108796	0.0625	0.104759	-0.811677	1	1
MA0131.2	HINFP	C2H2 zinc finger factors	Factors with multiple dispersed zinc fingers	2	14	21420	100107	0.125	0.176257	-0.582833	1	1
MA0043.2	HLF	Basic leucine zipper factors (bZIP)	CEBP-related	0	16	6365	115162	0	0.0523752	-inf	1	1
MA0653.1	IRF9	Tryptophan cluster factors	Interferon-regulatory factors	3	13	22336	99191	0.1875	0.183795	0.0353638	1	1
MA0654.1	ISX	Homeo domain factors	Paired-related HD factors	1	15	9139	112388	0.0625	0.0752014	-0.286598	1	1
MA0655.1	JDP2	Basic leucine zipper factors (bZIP)	Fos-related	2	14	17085	104442	0.125	0.140586	-0.195412	1	1
MA0662.1	MIXL1	Homeo domain factors	Paired-related HD factors	1	15	9060	112467	0.0625	0.0745513	-0.273057	1	1
MA0664.1	MLXIPL	Basic helix-loop-helix factors (bHLH)	bHLH-ZIP	1	15	8181	113346	0.0625	0.0673184	-0.11458	1	1
MA0666.1	MSX1	Homeo domain factors	NK	1	15	10107	111420	0.0625	0.0831667	-0.444352	1	1
MA0667.1	MYF6	Basic helix-loop-helix factors (bHLH)	MyoDASC-related factors	2	14	18045	103482	0.125	0.148486	-0.287643	1	1
MA0668.1	NEUROD2	Basic helix-loop-helix factors (bHLH)	Tal-related	1	15	9074	112453	0.0625	0.0746665	-0.275464	1	1
MA0048.2	NHLH1	Basic helix-loop-helix factors (bHLH)	Tal-related	5	11	38692	82835	0.3125	0.318382	-0.0393316	1	1
MA0674.1	NKX6-1	Homeo domain factors	NK	1	15	12053	109474	0.0625	0.0991796	-0.723761	1	1
MA0675.1	NKX6-2	Homeo domain factors	NK	1	15	12371	109156	0.0625	0.101796	-0.765528	1	1
MA0080.4	SPI1	Tryptophan cluster factors	Ets-related	4	12	30763	90764	0.25	0.253137	-0.0240447	1	1
MA0083.3	SRF	MADS box factors	Responders to external signals (SRFRLM1)	1	15	8111	113416	0.0625	0.0667424	-0.101291	1	1
MA0690.1	TBX21	T-Box factors	TBrain-related factors	2	14	19634	101893	0.125	0.161561	-0.431721	1	1
MA0695.1	ZBTB7C	C2H2 zinc finger factors	More than 3 adjacent zinc fingers	3	13	26976	94551	0.1875	0.221975	-0.306054	1	1
MA0699.1	LBX2	Homeo domain factors	NK	1	15	9062	112465	0.0625	0.0745678	-0.273401	1	1
MA0701.1	LHX9	Homeo domain factors	HD-LIM	1	15	9139	112388	0.0625	0.0752014	-0.286598	1	1
MA0702.1	LMX1A	Homeo domain factors	HD-LIM	1	15	8964	112563	0.0625	0.0737614	-0.256456	1	1
MA0703.1	LMX1B	Homeo domain factors	HD-LIM	1	15	8964	112563	0.0625	0.0737614	-0.256456	1	1
MA0122.2	NKX3-2	Homeo domain factors	NK	2	14	14548	106979	0.125	0.11971	0.0710968	1	1
MA0132.2	PDX1	Homeo domain factors	HOX	1	15	7958	113569	0.0625	0.0654834	-0.0718716	1	1
MA0716.1	PRRX1	Homeo domain factors	Paired-related HD factors	1	15	9139	112388	0.0625	0.0752014	-0.286598	1	1
MA0717.1	RAX2	Homeo domain factors	Paired-related HD factors	1	15	9139	112388	0.0625	0.0752014	-0.286598	1	1
MA0718.1	RAX	Homeo domain factors	Paired-related HD factors	1	15	9181	112346	0.0625	0.075547	-0.293753	1	1
MA0720.1	Shox2	Homeo domain factors	Paired-related HD factors	1	15	9139	112388	0.0625	0.0752014	-0.286598	1	1
MA0721.1	UNCX	Homeo domain factors	Paired-related HD factors	1	15	9139	112388	0.0625	0.0752014	-0.286598	1	1
MA0722.1	VAX1	Homeo domain factors	NK	1	15	8837	112690	0.0625	0.0727164	-0.234241	1	1
MA0723.1	VAX2	Homeo domain factors	NK	1	15	7826	113701	0.0625	0.0643972	-0.0460646	1	1
MA0113.3	NR3C1	Nuclear receptors with C4 zinc fingers	Steroid hormone receptors (NR3)	1	15	11985	109542	0.0625	0.0986201	-0.714703	1	1
MA0728.1	Nr2F6	Nuclear receptors with C4 zinc fingers	RXR-related receptors (NR2)	3	13	25594	95933	0.1875	0.210603	-0.209253	1	1
MA0472.2	EGR2	C2H2 zinc finger factors	Three-zinc finger Kruppel-related	3	13	26733	94794	0.1875	0.219976	-0.289297	1	1
MA0737.1	GLIS3	C2H2 zinc finger factors	More than 3 adjacent zinc fingers	4	12	28859	92668	0.25	0.23747	0.0980977	1	1
MA0739.1	Hic1	C2H2 zinc finger factors	Factors with multiple dispersed zinc fingers	4	12	31953	89574	0.25	0.262929	-0.0978326	1	1
MA0743.1	SCRT1	C2H2 zinc finger factors	More than 3 adjacent zinc fingers	2	14	18089	103438	0.125	0.148848	-0.29177	1	1
MA0749.1	ZBED1	C2H2 zinc finger factors	BED zinc finger factors	0	16	1949	119578	0	0.0160376	-inf	1	1
MA0759.1	ELK3	Tryptophan cluster factors	Ets-related	1	15	11600	109927	0.0625	0.095452	-0.662518	1	1
MA0760.1	ERF	Tryptophan cluster factors	Ets-related	1	15	13499	108028	0.0625	0.111078	-0.906403	1	1
MA0098.3	ETS1	Tryptophan cluster factors	Ets-related	2	14	15347	106180	0.125	0.126285	-0.0168717	1	1
MA0762.1	ETV2	Tryptophan cluster factors	Ets-related	2	14	15445	106082	0.125	0.127091	-0.0273876	1	1
MA0763.1	ETV3	Tryptophan cluster factors	Ets-related	1	15	11055	110472	0.0625	0.0909674	-0.585933	1	1
MA0156.2	FEV	Tryptophan cluster factors	Ets-related	1	15	11038	110489	0.0625	0.0908276	-0.58349	1	1
MA0766.1	GATA5	Other C4 zinc finger-type factors	C4-GATA-related	1	15	11636	109891	0.0625	0.0957483	-0.667462	1	1
MA0769.1	Tcf7	High-mobility group (HMG) domain factors	TCF-7-related factors	3	13	23766	97761	0.1875	0.195561	-0.0751439	1	1
MA0770.1	HSF2	Heat shock factors	HSF factors	2	14	17135	104392	0.125	0.140997	-0.200322	1	1
MA0052.3	MEF2A	MADS box factors	Regulators of differentiation	3	13	25480	96047	0.1875	0.209665	-0.201099	1	1
MA0776.1	MYBL1	Tryptophan cluster factors	MybSANT domain factors	0	16	3037	118490	0	0.0249903	-inf	1	1
MA0777.1	MYBL2	Tryptophan cluster factors	MybSANT domain factors	0	16	3270	118257	0	0.0269076	-inf	1	1
MA0781.1	PAX9	Paired box factors	Paired domain only	1	15	12558	108969	0.0625	0.103335	-0.789646	1	1
MA0790.1	POU4F1	Homeo domain factors	POU domain factors	2	14	17445	104082	0.125	0.143548	-0.230499	1	1
MA0791.1	POU4F3	Homeo domain factors	POU domain factors	2	14	16666	104861	0.125	0.137138	-0.153891	1	1
MA0800.1	EOMES	T-Box factors	TBrain-related factors	2	14	19040	102487	0.125	0.156673	-0.379015	1	1
MA0802.1	TBR1	T-Box factors	TBrain-related factors	2	14	19382	102145	0.125	0.159487	-0.409521	1	1
MA0807.1	TBX5	T-Box factors	TBX2-related factors	3	13	24110	97417	0.1875	0.198392	-0.10089	1	1
MA0813.1	TFAP2B	Basic helix-span-helix factors (bHSH)	AP-2	4	12	35439	86088	0.25	0.291614	-0.304468	1	1
MA0464.2	BHLHE40	Basic helix-loop-helix factors (bHLH)	Hairy-related factors	1	15	9507	112020	0.0625	0.0782295	-0.348292	1	1
MA0819.1	CLOCK	Basic helix-loop-helix factors (bHLH)	PAS domain factors	1	15	9611	111916	0.0625	0.0790853	-0.365331	1	1
MA0821.1	HES5	Basic helix-loop-helix factors (bHLH)	Hairy-related factors	2	14	15862	105665	0.125	0.130522	-0.0715106	1	1
MA0822.1	HES7	Basic helix-loop-helix factors (bHLH)	Hairy-related factors	2	14	16975	104552	0.125	0.139681	-0.184569	1	1
MA0832.1	Tcf21	Basic helix-loop-helix factors (bHLH)	Tal-related	3	13	27425	94102	0.1875	0.22567	-0.336735	1	1
MA0466.2	CEBPB	Basic leucine zipper factors (bZIP)	CEBP-related	0	16	5767	115760	0	0.0474545	-inf	1	1
MA0836.1	CEBPD	Basic leucine zipper factors (bZIP)	CEBP-related	0	16	5727	115800	0	0.0471253	-inf	1	1
MA0837.1	CEBPE	Basic leucine zipper factors (bZIP)	CEBP-related	0	16	6013	115514	0	0.0494787	-inf	1	1
MA0838.1	CEBPG	Basic leucine zipper factors (bZIP)	CEBP-related	0	16	5808	115719	0	0.0477918	-inf	1	1
MA0844.1	XBP1	Basic leucine zipper factors (bZIP)	XBP-1-related factors	1	15	7459	114068	0.0625	0.0613773	0.0278822	1	1
MA0855.1	RXRB	Nuclear receptors with C4 zinc fingers	RXR-related receptors (NR2)	2	14	20825	100702	0.125	0.171361	-0.533643	1	1
MA0857.1	Rarb	Nuclear receptors with C4 zinc fingers	Thyroid hormone receptor-related factors (NR1)	3	13	26497	95030	0.1875	0.218034	-0.272918	1	1
MA0525.2	TP63	p53 domain factors	p53-related factors	1	15	7956	113571	0.0625	0.0654669	-0.0714835	1	1
MA0862.1	GMEB2	SAND domain factors	GMEB	0	16	1652	119875	0	0.0135937	-inf	1	1
MA0863.1	MTF1	C2H2 zinc finger factors	More than 3 adjacent zinc fingers	2	14	18131	103396	0.125	0.149193	-0.295702	1	1
MA0024.3	E2F1	Fork headwinged helix factors	E2F	0	16	5553	115974	0	0.0456935	-inf	1	1
MA0864.1	E2F2	Fork headwinged helix factors	E2F	0	16	5112	116415	0	0.0420647	-inf	1	1
MA0867.1	SOX4	High-mobility group (HMG) domain factors	SOX-related factors	2	14	19566	101961	0.125	0.161001	-0.425753	1	1
MA0869.1	Sox11	High-mobility group (HMG) domain factors	SOX-related factors	2	14	19345	102182	0.125	0.159183	-0.406242	1	1
MA0873.1	HOXD12	Homeo domain factors	HOX	0	16	5106	116421	0	0.0420154	-inf	1	1
MA0875.1	BARX1	Homeo domain factors	NK	1	15	10535	110992	0.0625	0.0866886	-0.509632	1	1
MA0876.1	BSX	Homeo domain factors	NK	1	15	10192	111335	0.0625	0.0838661	-0.457538	1	1
MA0877.1	Barhl1	Homeo domain factors	NK	1	15	10923	110604	0.0625	0.0898813	-0.566875	1	1
MA0878.1	CDX1	Homeo domain factors	HOX	2	14	17416	104111	0.125	0.14331	-0.227695	1	1
MA0881.1	Dlx4	Homeo domain factors	NK	1	15	8439	113088	0.0625	0.0694414	-0.162664	1	1
MA0889.1	GBX1	Homeo domain factors	HOX	1	15	7701	113826	0.0625	0.0633686	-0.02125	1	1
MA0900.1	HOXA2	Homeo domain factors	HOX	1	15	8452	113075	0.0625	0.0695483	-0.165051	1	1
MA0905.1	HOXC10	Homeo domain factors	HOX	1	15	8169	113358	0.0625	0.0672196	-0.112309	1	1
MA0907.1	HOXC13	Homeo domain factors	HOX	1	15	10415	111112	0.0625	0.0857011	-0.491665	1	1
MA0911.1	Hoxa11	Homeo domain factors	HOX	0	16	5727	115800	0	0.0471253	-inf	1	1
MA0913.1	Hoxd9	Homeo domain factors	HOX	2	14	18166	103361	0.125	0.149481	-0.298973	1	1
MA1100.1	ASCL1	Basic helix-loop-helix factors (bHLH)	MyoDASC-related factors	8	8	61772	59755	0.5	0.508299	-0.0479056	1	1
MA0852.2	FOXK1	Fork headwinged helix factors	FOX	2	14	19115	102412	0.125	0.15729	-0.385743	1	1
MA1106.1	HIF1A	Basic helix-loop-helix factors (bHLH)	PAS domain factors	1	15	10092	111435	0.0625	0.0830433	-0.442014	1	1
MA0495.2	MAFF	Basic leucine zipper factors (bZIP)	Maf-related	2	14	19588	101939	0.125	0.161182	-0.427686	1	1
MA0496.2	MAFK	Basic leucine zipper factors (bZIP)	Maf-related	2	14	18798	102729	0.125	0.154682	-0.357159	1	1
MA0620.2	MITF	Basic helix-loop-helix factors (bHLH)	bHLH-ZIP	1	15	11601	109926	0.0625	0.0954603	-0.662655	1	1
MA0104.4	MYCN	Basic helix-loop-helix factors (bHLH)	bHLH-ZIP	2	14	16095	105432	0.125	0.13244	-0.0957391	1	1
MA1111.1	NR2F2	Nuclear receptors with C4 zinc fingers	RXR-related receptors (NR2)	2	14	20702	100825	0.125	0.170349	-0.523336	1	1
MA1114.1	PBX3	Homeo domain factors	TALE-type homeo domain factors	5	11	39557	81970	0.3125	0.3255	-0.0863388	1	1
MA0508.2	PRDM1	C2H2 zinc finger factors	More than 3 adjacent zinc fingers	3	13	25297	96230	0.1875	0.20816	-0.187954	1	1
MA1117.1	RELB	Rel homology region (RHR) factors	NF-kappaB-related factors	3	13	25577	95950	0.1875	0.210464	-0.208039	1	1
MA0442.2	SOX10	High-mobility group (HMG) domain factors	SOX-related factors	4	12	33772	87755	0.25	0.277897	-0.207302	1	1
MA1123.1	TWIST1	Basic helix-loop-helix factors (bHLH)	Tal-related	4	12	33359	88168	0.25	0.274499	-0.182778	1	1
MA1125.1	ZNF384	C2H2 zinc finger factors	More than 3 adjacent zinc fingers	6	10	45478	76049	0.375	0.374221	0.00479521	1	1
MA0037.3	GATA3	Other C4 zinc finger-type factors	C4-GATA-related	1	15	10189	111338	0.0625	0.0838415	-0.457075	1	1
MA1136.1	FOSB::JUNB	Basic leucine zipper factors (bZIP)::Basic leucine zipper factors (bZIP)	Fos-related::Jun-related	0	16	6354	115173	0	0.0522847	-inf	1	1
MA1139.1	FOSL2::JUNB	Basic leucine zipper factors (bZIP)::Basic leucine zipper factors (bZIP)	Fos-related::Jun-related	0	16	6450	115077	0	0.0530746	-inf	1	1
MA1140.1	JUNB	Basic leucine zipper factors (bZIP)	Jun-related	0	16	4917	116610	0	0.0404601	-inf	1	1
MA0831.2	TFE3	Basic helix-loop-helix factors (bHLH)	bHLH-ZIP	1	15	10673	110854	0.0625	0.0878241	-0.530206	1	1
MA0693.2	VDR	Nuclear receptors with C4 zinc fingers	Thyroid hormone receptor-related factors (NR1)	2	14	19227	102300	0.125	0.158212	-0.39575	1	1
MA1421.1	TCF7L1	High-mobility group (HMG) domain factors	TCF-7-related factors	3	13	23992	97535	0.1875	0.197421	-0.0921513	1	1

## Sheet: 1.YA_vs_0.NCI_Immature.up
Motif	Motif Name	Class	Family	Hits in list	Unhit in list	Hits in background	Unhit in background	Percent in list	Percent in background	Log2 Odds Ratio	PValue	QValue
MA0737.1	GLIS3	C2H2 zinc finger factors	More than 3 adjacent zinc fingers	2	53	28859	92668	0.0363636	0.23747	-3.04486	9.22712e-05	0.0519024
MA0715.1	PROP1	Homeo domain factors	Paired-related HD factors	15	40	11864	109663	0.272727	0.0976244	1.79335	0.000185818	0.0519024
MA1120.1	SOX13	High-mobility group (HMG) domain factors	SOX-related factors	20	35	19501	102026	0.363636	0.160466	1.57994	0.000272215	0.0519024
MA0713.1	PHOX2A	Homeo domain factors	Paired-related HD factors	13	42	11453	110074	0.236364	0.0942424	1.57271	0.00150862	0.215733
MA0442.2	SOX10	High-mobility group (HMG) domain factors	SOX-related factors	26	29	33772	87755	0.472727	0.277897	1.22012	0.00227062	0.242113
MA0143.3	Sox2	High-mobility group (HMG) domain factors	SOX-related factors	21	34	25125	96402	0.381818	0.206744	1.24478	0.00253965	0.242113
MA1155.1	ZSCAN4	C2H2 zinc finger factors	More than 3 adjacent zinc fingers	23	32	29883	91644	0.418182	0.245896	1.14029	0.00460861	0.315534
MA0077.1	SOX9	High-mobility group (HMG) domain factors	SOX-related factors	14	41	14302	107225	0.254545	0.117686	1.35618	0.00488393	0.315534
MA0803.1	TBX15	T-Box factors	TBX1-related factors	3	52	23448	98079	0.0545455	0.192945	-2.05099	0.00576484	0.315534
MA0722.1	VAX1	Homeo domain factors	NK	10	45	8837	112690	0.181818	0.0727164	1.50283	0.00585824	0.315534
MA0158.1	HOXA5	Homeo domain factors	HOX	10	45	8983	112544	0.181818	0.0739177	1.47713	0.0065588	0.315534
MA0793.1	POU6F2	Homeo domain factors	POU domain factors	13	42	13021	108506	0.236364	0.107145	1.36697	0.00661959	0.315534
MA0521.1	Tcf12	Basic helix-loop-helix factors (bHLH)	E2A	33	22	50531	70996	0.6	0.415801	1.07554	0.00868178	0.375539
MA0500.1	Myog	Basic helix-loop-helix factors (bHLH)	MyoDASC-related factors	33	22	51386	70141	0.6	0.422836	1.03386	0.00919152	0.375539
MA0736.1	GLIS2	C2H2 zinc finger factors	More than 3 adjacent zinc fingers	7	48	34131	87396	0.127273	0.280851	-1.42101	0.0101215	0.385967
MA0035.3	Gata1	Other C4 zinc finger-type factors	C4-GATA-related	15	40	17508	104019	0.272727	0.144067	1.15571	0.0113962	0.401889
MA0776.1	MYBL1	Tryptophan cluster factors	MybSANT domain factors	5	50	3037	118490	0.0909091	0.0249903	1.96405	0.012077	0.401889
MA0515.1	Sox6	High-mobility group (HMG) domain factors	SOX-related factors	23	32	31864	89663	0.418182	0.262197	1.01619	0.0131997	0.401889
MA0499.1	Myod1	Basic helix-loop-helix factors (bHLH)	MyoDASC-related factors	33	22	51825	69702	0.6	0.426448	1.01252	0.0133495	0.401889
MA0681.1	Phox2b	Homeo domain factors	Paired-related HD factors	11	44	11042	110485	0.2	0.0908605	1.32276	0.0149978	0.428936
MA0791.1	POU4F3	Homeo domain factors	POU domain factors	14	41	16666	104861	0.254545	0.137138	1.1033	0.0174926	0.467505
MA0766.1	GATA5	Other C4 zinc finger-type factors	C4-GATA-related	11	44	11636	109891	0.2	0.0957483	1.23935	0.017981	0.467505
MA0039.3	KLF4	C2H2 zinc finger factors	Three-zinc finger Kruppel-related	9	46	37811	83716	0.163636	0.311133	-1.20693	0.0189663	0.471683
MA0597.1	THAP1	C2CH THAP-type zinc finger factors	THAP-related factors	11	44	41929	79598	0.2	0.345018	-1.07521	0.0231326	0.509494
MA0675.1	NKX6-2	Homeo domain factors	NK	11	44	12371	109156	0.2	0.101796	1.14134	0.0240402	0.509494
MA0062.2	Gabpa	Tryptophan cluster factors	Ets-related	4	51	23056	98471	0.0727273	0.189719	-1.57787	0.0244505	0.509494
MA0489.1	JUN	Basic leucine zipper factors (bZIP)	Jun-related	4	51	23444	98083	0.0727273	0.192912	-1.60764	0.0245948	0.509494
MA0618.1	LBX1	Homeo domain factors	NK	10	45	10729	110798	0.181818	0.0882849	1.19839	0.0272307	0.509494
MA0030.1	FOXF2	Fork headwinged helix factors	FOX	13	42	15985	105542	0.236364	0.131535	1.03116	0.0279892	0.509494
MA0742.1	Klf12	C2H2 zinc finger factors	Three-zinc finger Kruppel-related	10	45	38650	82877	0.181818	0.318036	-1.06941	0.0297763	0.509494
MA0478.1	FOSL2	Basic leucine zipper factors (bZIP)	Fos-related	7	48	30737	90790	0.127273	0.252923	-1.21514	0.0299308	0.509494
MA0467.1	Crx	Homeo domain factors	Paired-related HD factors	14	41	17460	104067	0.254545	0.143672	1.02521	0.0314775	0.509494
MA0820.1	FIGLA	Basic helix-loop-helix factors (bHLH)	Tal-related	8	47	33902	87625	0.145455	0.278967	-1.18461	0.0338362	0.509494
MA0635.1	BARHL2	Homeo domain factors	NK	6	49	5392	116135	0.109091	0.0443687	1.39912	0.0345962	0.509494
MA0725.1	VSX1	Homeo domain factors	Paired-related HD factors	9	46	9237	112290	0.163636	0.0760078	1.25001	0.0350289	0.509494
MA0726.1	VSX2	Homeo domain factors	Paired-related HD factors	9	46	9237	112290	0.163636	0.0760078	1.25001	0.0350289	0.509494
MA1104.1	GATA6	Other C4 zinc finger-type factors	C4-GATA-related	12	43	14563	106964	0.218182	0.119833	1.03545	0.0352035	0.509494
MA0490.1	JUNB	Basic leucine zipper factors (bZIP)	Jun-related	4	51	22674	98853	0.0727273	0.186576	-1.54818	0.0355049	0.509494
MA0070.1	PBX1	Homeo domain factors	TALE-type homeo domain factors	10	45	11449	110078	0.181818	0.0942095	1.0953	0.0356511	0.509494
MA0076.2	ELK4	Tryptophan cluster factors	Ets-related	6	49	28146	93381	0.109091	0.231603	-1.29959	0.0360528	0.509494
MA0883.1	Dmbx1	Homeo domain factors	Paired-related HD factors	9	46	9434	112093	0.163636	0.0776288	1.21694	0.0366923	0.509494
MA0813.1	TFAP2B	Basic helix-span-helix factors (bHSH)	AP-2	9	46	35439	86088	0.163636	0.291614	-1.07316	0.0375441	0.509494
MA1152.1	SOX15	High-mobility group (HMG) domain factors	SOX-related factors	20	35	28952	92575	0.363636	0.238235	0.869567	0.0383011	0.509494
MA0779.1	PAX1	Paired box factors	Paired domain only	1	54	11941	109586	0.0181818	0.098258	-2.55681	0.0403899	0.525069
MA0486.2	HSF1	Heat shock factors	HSF factors	2	53	15650	105877	0.0363636	0.128778	-1.96976	0.0415837	0.528575
MA0893.1	GSX2	Homeo domain factors	HOX	11	44	12743	108784	0.2	0.104857	1.09368	0.0427012	0.53098
MA0037.3	GATA3	Other C4 zinc finger-type factors	C4-GATA-related	9	46	10189	111338	0.163636	0.0838415	1.09621	0.0464497	0.565303
MA0892.1	GSX1	Homeo domain factors	HOX	9	46	10545	110982	0.163636	0.0867708	1.04205	0.0529324	0.612153
MA0790.1	POU4F1	Homeo domain factors	POU domain factors	13	42	17445	104082	0.236364	0.143548	0.884938	0.0552	0.612153
MA0598.2	EHF	Tryptophan cluster factors	Ets-related	3	52	18273	103254	0.0545455	0.150362	-1.61706	0.0561476	0.612153
MA0646.1	GCM1	GCM domain factors	GCM	14	41	18575	102952	0.254545	0.152847	0.92028	0.0574975	0.612153
MA0136.2	ELF5	Tryptophan cluster factors	Ets-related	5	50	23862	97665	0.0909091	0.196351	-1.28881	0.0596437	0.612153
MA0799.1	RFX4	Fork headwinged helix factors	RFX-related factors	2	53	14406	107121	0.0363636	0.118542	-1.83341	0.0596945	0.612153
MA0510.2	RFX5	Fork headwinged helix factors	RFX-related factors	2	53	14267	107260	0.0363636	0.117398	-1.81755	0.0598538	0.612153
MA0777.1	MYBL2	Tryptophan cluster factors	MybSANT domain factors	4	51	3270	118257	0.0727273	0.0269076	1.50403	0.0606815	0.612153
MA0869.1	Sox11	High-mobility group (HMG) domain factors	SOX-related factors	14	41	19345	102182	0.254545	0.159183	0.850901	0.063734	0.612153
MA0699.1	LBX2	Homeo domain factors	NK	8	47	9062	112465	0.145455	0.0745678	1.0789	0.0643762	0.612153
MA0674.1	NKX6-1	Homeo domain factors	NK	10	45	12053	109474	0.181818	0.0991796	1.01321	0.0649227	0.612153
MA0700.1	LHX2	Homeo domain factors	HD-LIM	8	47	9137	112390	0.145455	0.0751849	1.06605	0.0659167	0.612153
MA0767.1	GCM2	GCM domain factors	GCM	12	43	15729	105798	0.218182	0.129428	0.908457	0.0667914	0.612153
MA0649.1	HEY2	Basic helix-loop-helix factors (bHLH)	Hairy-related factors	12	43	15743	105784	0.218182	0.129543	0.906985	0.0669473	0.612153
MA1130.1	FOSL2::JUN	Basic leucine zipper factors (bZIP)::Basic leucine zipper factors (bZIP)	Fos-related::Jun-related	4	51	20119	101408	0.0727273	0.165552	-1.33888	0.0688854	0.612153
MA1137.1	FOSL1::JUNB	Basic leucine zipper factors (bZIP)::Basic leucine zipper factors (bZIP)	Fos-related::Jun-related	4	51	19841	101686	0.0727273	0.163264	-1.31486	0.0692898	0.612153
MA0815.1	TFAP2C	Basic helix-span-helix factors (bHSH)	AP-2	9	46	33456	88071	0.163636	0.275297	-0.957257	0.0698572	0.612153
MA0488.1	JUN	Basic leucine zipper factors (bZIP)	Jun-related	15	40	20826	100701	0.272727	0.171369	0.858573	0.0704746	0.612153
MA0084.1	SRY	High-mobility group (HMG) domain factors	SOX-related factors	12	43	16039	105488	0.218182	0.131979	0.87611	0.070633	0.612153
MA0482.1	Gata4	Other C4 zinc finger-type factors	C4-GATA-related	12	43	16120	105407	0.218182	0.132645	0.867734	0.0717707	0.612729
MA0833.1	ATF4	Basic leucine zipper factors (bZIP)	ATF-4-related factors	10	45	12849	108678	0.181818	0.10573	0.910337	0.0768574	0.646422
MA0473.2	ELF1	Tryptophan cluster factors	Ets-related	3	52	17256	104271	0.0545455	0.141993	-1.5203	0.0787982	0.646422
MA1145.1	FOSL2::JUND	Basic leucine zipper factors (bZIP)::Basic leucine zipper factors (bZIP)	Fos-related::Jun-related	8	47	9725	111802	0.145455	0.0800234	0.968535	0.0804684	0.646422
MA0048.2	NHLH1	Basic helix-loop-helix factors (bHLH)	Tal-related	24	31	38692	82835	0.436364	0.318382	0.728981	0.081005	0.646422
MA0889.1	GBX1	Homeo domain factors	HOX	7	48	7701	113826	0.127273	0.0633686	1.108	0.0852084	0.646422
MA0659.1	MAFG	Basic leucine zipper factors (bZIP)	Maf-related	2	53	13482	108045	0.0363636	0.110938	-1.72539	0.0852361	0.646422
MA0798.1	RFX3	Fork headwinged helix factors	RFX-related factors	2	53	13684	107843	0.0363636	0.1126	-1.74954	0.0854023	0.646422
MA0594.1	Hoxa9	Homeo domain factors	HOX	2	53	13333	108194	0.0363636	0.109712	-1.70736	0.0854178	0.646422
MA0687.1	SPIC	Tryptophan cluster factors	Ets-related	8	47	30231	91296	0.145455	0.24876	-0.95998	0.0858882	0.646422
MA1103.1	FOXK2	Fork headwinged helix factors	FOX	13	42	18280	103247	0.236364	0.150419	0.805873	0.0873719	0.649048
MA0132.2	PDX1	Homeo domain factors	HOX	7	48	7958	113569	0.127273	0.0654834	1.0574	0.0908162	0.649836
MA0138.2	REST	C2H2 zinc finger factors	Factors with multiple dispersed zinc fingers	14	41	44301	77226	0.254545	0.364536	-0.748443	0.0943143	0.649836
MA0865.1	E2F8	Fork headwinged helix factors	E2F	4	51	19230	102297	0.0727273	0.158236	-1.26109	0.0951827	0.649836
MA1135.1	FOSB::JUNB	Basic leucine zipper factors (bZIP)::Basic leucine zipper factors (bZIP)	Fos-related::Jun-related	4	51	19412	102115	0.0727273	0.159734	-1.27725	0.0954071	0.649836
MA1144.1	FOSL2::JUND	Basic leucine zipper factors (bZIP)::Basic leucine zipper factors (bZIP)	Fos-related::Jun-related	4	51	18950	102577	0.0727273	0.155932	-1.23599	0.0954325	0.649836
MA0479.1	FOXH1	Fork headwinged helix factors	FOX	4	51	18920	102607	0.0727273	0.155686	-1.23328	0.0955023	0.649836
MA0698.1	ZBTB18	C2H2 zinc finger factors	More than 3 adjacent zinc fingers	21	34	33611	87916	0.381818	0.276572	0.69204	0.0961932	0.649836
MA0099.3	FOS::JUN	Basic leucine zipper factors (bZIP)::Basic leucine zipper factors (bZIP)	Fos-related::Jun-related	4	51	19739	101788	0.0727273	0.162425	-1.30598	0.0965665	0.649836
MA0872.1	TFAP2A	Basic helix-span-helix factors (bHSH)	AP-2	10	45	35208	86319	0.181818	0.289713	-0.876144	0.100577	0.66348
MA0493.1	Klf1	C2H2 zinc finger factors	Three-zinc finger Kruppel-related	17	38	51671	69856	0.309091	0.425181	-0.725425	0.100914	0.66348
MA0695.1	ZBTB7C	C2H2 zinc finger factors	More than 3 adjacent zinc fingers	7	48	26976	94551	0.127273	0.221975	-0.968142	0.104387	0.665957
MA0073.1	RREB1	C2H2 zinc finger factors	Factors with multiple dispersed zinc fingers	20	35	58258	63269	0.363636	0.479383	-0.688301	0.104656	0.665957
MA0900.1	HOXA2	Homeo domain factors	HOX	7	48	8452	113075	0.127273	0.0695483	0.964251	0.104783	0.665957
MA0705.1	Lhx8	Homeo domain factors	HD-LIM	7	48	8507	113020	0.127273	0.0700009	0.954199	0.106589	0.669988
MA1128.1	FOSL1::JUN	Basic leucine zipper factors (bZIP)::Basic leucine zipper factors (bZIP)	Fos-related::Jun-related	5	50	21783	99744	0.0909091	0.179244	-1.12688	0.111353	0.688965
MA1141.1	FOS::JUND	Basic leucine zipper factors (bZIP)::Basic leucine zipper factors (bZIP)	Fos-related::Jun-related	5	50	21975	99552	0.0909091	0.180824	-1.14232	0.112017	0.688965
MA0683.1	POU4F2	Homeo domain factors	POU domain factors	12	43	17007	104520	0.218182	0.139944	0.778264	0.116077	0.706342
MA1127.1	FOSB::JUN	Basic leucine zipper factors (bZIP)::Basic leucine zipper factors (bZIP)	Fos-related::Jun-related	7	48	8896	112631	0.127273	0.0732018	0.88464	0.120728	0.715303
MA0712.1	OTX2	Homeo domain factors	Paired-related HD factors	7	48	8924	112603	0.127273	0.0734322	0.879756	0.121836	0.715303
MA0697.1	ZIC3	C2H2 zinc finger factors	More than 3 adjacent zinc fingers	14	41	43550	77977	0.254545	0.358357	-0.709815	0.122349	0.715303
MA0091.1	TAL1::TCF3	Basic helix-loop-helix factors (bHLH)::Basic helix-loop-helix factors (bHLH)	Tal-related::E2A	6	49	23893	97634	0.109091	0.196607	-0.998923	0.125506	0.715303
MA0807.1	TBX5	T-Box factors	TBX2-related factors	6	49	24110	97417	0.109091	0.198392	-1.01517	0.125925	0.715303
MA0492.1	JUND	Basic leucine zipper factors (bZIP)	Jun-related	12	43	17697	103830	0.218182	0.145622	0.711331	0.127316	0.715303
MA0504.1	NR2C2	Nuclear receptors with C4 zinc fingers	RXR-related receptors (NR2)	27	28	47023	74504	0.490909	0.386935	0.611432	0.1278	0.715303
MA0909.1	HOXD13	Homeo domain factors	HOX	12	43	17735	103792	0.218182	0.145935	0.707709	0.128077	0.715303
MA0841.1	NFE2	Basic leucine zipper factors (bZIP)	Jun-related	4	51	18538	102989	0.0727273	0.152542	-1.19849	0.130705	0.715303
MA0641.1	ELF4	Tryptophan cluster factors	Ets-related	4	51	18707	102820	0.0727273	0.153933	-1.21395	0.131504	0.715303
MA1138.1	FOSL2::JUNB	Basic leucine zipper factors (bZIP)::Basic leucine zipper factors (bZIP)	Fos-related::Jun-related	4	51	18823	102704	0.0727273	0.154887	-1.2245	0.132232	0.715303
MA0706.1	MEOX2	Homeo domain factors	HOX	8	47	10003	111524	0.145455	0.0823109	0.924322	0.132556	0.715303
MA0876.1	BSX	Homeo domain factors	NK	8	47	10192	111335	0.145455	0.0838661	0.894746	0.135722	0.725543
MA0728.1	Nr2F6	Nuclear receptors with C4 zinc fingers	RXR-related receptors (NR2)	7	48	25594	95933	0.127273	0.210603	-0.871352	0.139597	0.736849
MA0867.1	SOX4	High-mobility group (HMG) domain factors	SOX-related factors	13	42	19566	101961	0.236364	0.161001	0.689706	0.140413	0.736849
MA1126.1	FOS::JUN	Basic leucine zipper factors (bZIP)::Basic leucine zipper factors (bZIP)	Fos-related::Jun-related	8	47	10520	111007	0.145455	0.0865651	0.844844	0.142693	0.742002
MA0691.1	TFAP4	Basic helix-loop-helix factors (bHLH)	bHLH-ZIP	17	38	27315	94212	0.309091	0.224765	0.625746	0.145508	0.749823
MA0846.1	FOXC2	Fork headwinged helix factors	FOX	17	38	27780	93747	0.309091	0.228591	0.594255	0.15138	0.771206
MA0866.1	SOX21	High-mobility group (HMG) domain factors	SOX-related factors	11	44	15594	105933	0.2	0.128317	0.764077	0.153362	0.771206
MA0877.1	Barhl1	Homeo domain factors	NK	8	47	10923	110604	0.145455	0.0898813	0.785361	0.153702	0.771206
MA0075.2	Prrx2	Homeo domain factors	Paired-related HD factors	6	49	7567	113960	0.109091	0.062266	0.882851	0.155182	0.771861
MA0591.1	Bach1::Mafk	Basic leucine zipper factors (bZIP)::Basic leucine zipper factors (bZIP)	Jun-related::Maf-related	9	46	30566	90961	0.163636	0.251516	-0.780248	0.16148	0.782364
MA0017.2	NR2F1	Nuclear receptors with C4 zinc fingers	RXR-related receptors (NR2)	9	46	30109	91418	0.163636	0.247756	-0.751294	0.162408	0.782364
MA0476.1	FOS	Basic leucine zipper factors (bZIP)	Fos-related	6	49	23002	98525	0.109091	0.189275	-0.930994	0.166778	0.782364
MA0723.1	VAX2	Homeo domain factors	NK	6	49	7826	113701	0.109091	0.0643972	0.831067	0.167068	0.782364
MA0634.1	ALX3	Homeo domain factors	Paired-related HD factors	8	47	11346	110181	0.145455	0.093362	0.725015	0.167974	0.782364
MA0854.1	Alx1	Homeo domain factors	Paired-related HD factors	6	49	7845	113682	0.109091	0.0645536	0.827328	0.16799	0.782364
MA0912.1	Hoxd3	Homeo domain factors	HOX	8	47	11362	110165	0.145455	0.0934936	0.722773	0.168566	0.782364
MA0739.1	Hic1	C2H2 zinc finger factors	Factors with multiple dispersed zinc fingers	19	36	31953	89574	0.345455	0.262929	0.565126	0.169255	0.782364
MA0600.2	RFX2	Fork headwinged helix factors	RFX-related factors	2	53	12037	109490	0.0363636	0.0990479	-1.54266	0.170639	0.782364
MA0677.1	Nr2f6	Nuclear receptors with C4 zinc fingers	RXR-related receptors (NR2)	15	40	23703	97824	0.272727	0.195043	0.630073	0.171052	0.782364
MA1100.1	ASCL1	Basic helix-loop-helix factors (bHLH)	MyoDASC-related factors	33	22	61772	59755	0.6	0.508299	0.537059	0.180215	0.782364
MA0882.1	DLX6	Homeo domain factors	NK	6	49	8086	113441	0.109091	0.0665367	0.780612	0.180249	0.782364
MA0083.3	SRF	MADS box factors	Responders to external signals (SRFRLM1)	6	49	8111	113416	0.109091	0.0667424	0.77584	0.181579	0.782364
MA0036.3	GATA2	Other C4 zinc finger-type factors	C4-GATA-related	9	46	12839	108688	0.163636	0.105647	0.727936	0.182535	0.782364
MA0115.1	NR1H2::RXRA	Nuclear receptors with C4 zinc fingers::Nuclear receptors with C4 zinc fingers	Thyroid hormone receptor-related factors (NR1)::RXR-related receptors (NR2)	12	43	18228	103299	0.218182	0.149991	0.661285	0.182604	0.782364
MA0611.1	Dux	Homeo domain factors	Paired-related HD factors	9	46	12939	108588	0.163636	0.10647	0.715414	0.184739	0.782364
MA1148.1	PPARA::RXRA	Nuclear receptors with C4 zinc fingers::Nuclear receptors with C4 zinc fingers	Thyroid hormone receptor-related factors (NR1)::RXR-related receptors (NR2)	16	39	25851	95676	0.290909	0.212718	0.602528	0.185354	0.782364
MA0630.1	SHOX	Homeo domain factors	Paired-related HD factors	7	48	9139	112388	0.127273	0.0752014	0.842689	0.191332	0.782364
MA0654.1	ISX	Homeo domain factors	Paired-related HD factors	7	48	9139	112388	0.127273	0.0752014	0.842689	0.191332	0.782364
MA0701.1	LHX9	Homeo domain factors	HD-LIM	7	48	9139	112388	0.127273	0.0752014	0.842689	0.191332	0.782364
MA0716.1	PRRX1	Homeo domain factors	Paired-related HD factors	7	48	9139	112388	0.127273	0.0752014	0.842689	0.191332	0.782364
MA0717.1	RAX2	Homeo domain factors	Paired-related HD factors	7	48	9139	112388	0.127273	0.0752014	0.842689	0.191332	0.782364
MA0720.1	Shox2	Homeo domain factors	Paired-related HD factors	7	48	9139	112388	0.127273	0.0752014	0.842689	0.191332	0.782364
MA0721.1	UNCX	Homeo domain factors	Paired-related HD factors	7	48	9139	112388	0.127273	0.0752014	0.842689	0.191332	0.782364
MA0642.1	EN2	Homeo domain factors	NK	7	48	9285	112242	0.127273	0.0764028	0.817948	0.194555	0.782364
MA0890.1	GBX2	Homeo domain factors	HOX	7	48	9321	112206	0.127273	0.076699	0.811902	0.19542	0.782364
MA1142.1	FOSL1::JUND	Basic leucine zipper factors (bZIP)::Basic leucine zipper factors (bZIP)	Fos-related::Jun-related	5	50	19707	101820	0.0909091	0.162161	-0.952674	0.198632	0.782364
MA0852.2	FOXK1	Fork headwinged helix factors	FOX	12	43	19115	102412	0.218182	0.15729	0.580296	0.198912	0.782364
MA0640.1	ELF3	Tryptophan cluster factors	Ets-related	5	50	20021	101506	0.0909091	0.164745	-0.979934	0.200112	0.782364
MA0648.1	GSC	Homeo domain factors	Paired-related HD factors	7	48	9517	112010	0.127273	0.0783118	0.779356	0.200602	0.782364
MA0514.1	Sox3	High-mobility group (HMG) domain factors	SOX-related factors	24	31	42598	78929	0.436364	0.350523	0.520593	0.203427	0.782364
MA0904.1	Hoxb5	Homeo domain factors	HOX	7	48	9659	111868	0.127273	0.0794803	0.756158	0.204844	0.782364
MA0880.1	Dlx3	Homeo domain factors	NK	5	50	6301	115226	0.0909091	0.0518486	0.87076	0.20901	0.782364
MA0072.1	RORA	Nuclear receptors with C4 zinc fingers	Thyroid hormone receptor-related factors (NR1)	10	45	14702	106825	0.181818	0.120977	0.691225	0.209532	0.782364
MA0816.1	Ascl2	Basic helix-loop-helix factors (bHLH)	MyoDASC-related factors	25	30	45181	76346	0.454545	0.371777	0.493753	0.211221	0.782364
MA0519.1	Stat5a::Stat5b	STAT domain factors::STAT domain factors	STAT factors::STAT factors	18	37	30352	91175	0.327273	0.249755	0.547313	0.211417	0.782364
MA1139.1	FOSL2::JUNB	Basic leucine zipper factors (bZIP)::Basic leucine zipper factors (bZIP)	Fos-related::Jun-related	5	50	6450	115077	0.0909091	0.0530746	0.835217	0.21626	0.782364
MA0462.1	BATF::JUN	Basic leucine zipper factors (bZIP)::Basic leucine zipper factors (bZIP)	B-ATF-related factors::Jun-related	6	49	21751	99776	0.109091	0.178981	-0.83212	0.218261	0.782364
MA0491.1	JUND	Basic leucine zipper factors (bZIP)	Jun-related	6	49	21674	99853	0.109091	0.178347	-0.825891	0.21829	0.782364
MA0112.3	ESR1	Nuclear receptors with C4 zinc fingers	Steroid hormone receptors (NR3)	6	49	21610	99917	0.109091	0.177821	-0.820701	0.218367	0.782364
MA0886.1	EMX2	Homeo domain factors	NK	5	50	6496	115031	0.0909091	0.0534531	0.824388	0.218612	0.782364
MA0477.1	FOSL1	Basic leucine zipper factors (bZIP)	Fos-related	6	49	21992	99535	0.109091	0.180964	-0.851505	0.218616	0.782364
MA1133.1	JUN::JUNB	Basic leucine zipper factors (bZIP)::Basic leucine zipper factors (bZIP)	Jun-related::Jun-related	7	48	10076	111451	0.127273	0.0829116	0.689788	0.219524	0.782364
MA0599.1	KLF5	C2H2 zinc finger factors	Three-zinc finger Kruppel-related	37	18	71516	50011	0.672727	0.588478	0.523502	0.219942	0.782364
MA0749.1	ZBED1	C2H2 zinc finger factors	BED zinc finger factors	2	53	1949	119578	0.0363636	0.0160376	1.21113	0.220779	0.782364
MA0047.2	Foxa2	Fork headwinged helix factors	FOX	14	41	22416	99111	0.254545	0.184453	0.594311	0.220921	0.782364
MA0775.1	MEIS3	Homeo domain factors	TALE-type homeo domain factors	14	41	22573	98954	0.254545	0.185745	0.581955	0.222279	0.782364
MA0029.1	Mecom	C2H2 zinc finger factors	Factors with multiple dispersed zinc fingers	10	45	15465	106062	0.181818	0.127256	0.607892	0.223518	0.782364
MA0469.2	E2F3	Fork headwinged helix factors	E2F	3	52	3612	117915	0.0545455	0.0297218	0.913353	0.224314	0.782364
MA0623.1	Neurog1	Basic helix-loop-helix factors (bHLH)	Tal-related	2	53	10640	110887	0.0363636	0.0875526	-1.34639	0.234154	0.795338
MA0686.1	SPDEF	Tryptophan cluster factors	Ets-related	2	53	10788	110739	0.0363636	0.0887704	-1.36825	0.234426	0.795338
MA1153.1	Smad4	SMADNF-1 DNA-binding domain factors	SMAD factors	4	51	16545	104982	0.0727273	0.136143	-1.00674	0.235418	0.795338
MA0763.1	ETV3	Tryptophan cluster factors	Ets-related	2	53	11055	110472	0.0363636	0.0909674	-1.407	0.236095	0.795338
MA0101.1	REL	Rel homology region (RHR) factors	NF-kappaB-related factors	7	48	24266	97261	0.127273	0.199676	-0.77466	0.236278	0.795338
MA0093.2	USF1	Basic helix-loop-helix factors (bHLH)	bHLH-ZIP	7	48	24298	97229	0.127273	0.199939	-0.777035	0.236377	0.795338
MA0750.2	ZBTB7A	C2H2 zinc finger factors	More than 3 adjacent zinc fingers	12	43	36047	85480	0.218182	0.296617	-0.595628	0.238419	0.79752
MA0498.2	MEIS1	Homeo domain factors	TALE-type homeo domain factors	8	47	11620	109907	0.145455	0.0956166	0.686995	0.244513	0.812944
MA0795.1	SMAD3	SMADNF-1 DNA-binding domain factors	SMAD factors	5	50	6988	114539	0.0909091	0.0575016	0.712869	0.246809	0.812944
MA0899.1	HOXA10	Homeo domain factors	HOX	11	44	17560	103967	0.2	0.144495	0.565751	0.248073	0.812944
MA0040.1	Foxq1	Fork headwinged helix factors	FOX	11	44	17610	103917	0.2	0.144906	0.560955	0.249055	0.812944
MA0754.1	CUX1	Homeo domain factors	HD-CUT	3	52	3838	117689	0.0545455	0.0315815	0.822993	0.251549	0.812944
MA0494.1	Nr1h3::Rxra	Nuclear receptors with C4 zinc fingers::Nuclear receptors with C4 zinc fingers	Thyroid hormone receptor-related factors (NR1)::RXR-related receptors (NR2)	8	47	26139	95388	0.145455	0.215088	-0.686959	0.251558	0.812944
MA1134.1	FOS::JUNB	Basic leucine zipper factors (bZIP)::Basic leucine zipper factors (bZIP)	Fos-related::Jun-related	5	50	18737	102790	0.0909091	0.15418	-0.866179	0.260816	0.838127
MA0159.1	RARA::RXRA	Nuclear receptors with C4 zinc fingers::Nuclear receptors with C4 zinc fingers	Thyroid hormone receptor-related factors (NR1)::RXR-related receptors (NR2)	9	46	28740	92787	0.163636	0.236491	-0.662736	0.26565	0.843886
MA0470.1	E2F4	Fork headwinged helix factors	E2F	9	46	28741	92786	0.163636	0.236499	-0.662802	0.265652	0.843886
MA0592.2	Esrra	Nuclear receptors with C4 zinc fingers	Steroid hormone receptors (NR3)	12	43	19504	102023	0.218182	0.160491	0.545742	0.267653	0.843886
MA0752.1	ZNF410	C2H2 zinc finger factors	More than 3 adjacent zinc fingers	8	47	12482	109045	0.145455	0.10271	0.572399	0.268509	0.843886
MA0731.1	BCL6B	C2H2 zinc finger factors	More than 3 adjacent zinc fingers	12	43	19797	101730	0.218182	0.162902	0.520082	0.272234	0.844177
MA0474.2	ERG	Tryptophan cluster factors	Ets-related	3	52	12972	108555	0.0545455	0.106742	-1.05052	0.275497	0.844177
MA0527.1	ZBTB33	C2H2 zinc finger factors	Other factors with up to three adjacent zinc fingers	3	52	12866	108661	0.0545455	0.105869	-1.03727	0.275507	0.844177
MA0475.2	FLI1	Tryptophan cluster factors	Ets-related	3	52	12731	108796	0.0545455	0.104759	-1.02026	0.27583	0.844177
MA0632.1	Tcfl5	Basic helix-loop-helix factors (bHLH)	PAS domain factors	3	52	13384	108143	0.0545455	0.110132	-1.10111	0.27744	0.844177
MA0881.1	Dlx4	Homeo domain factors	NK	6	49	8439	113088	0.109091	0.0694414	0.714465	0.278254	0.844177
MA0894.1	HESX1	Homeo domain factors	Paired-related HD factors	6	49	8461	113066	0.109091	0.0696224	0.710428	0.278932	0.844177
MA0661.1	MEOX1	Homeo domain factors	HOX	6	49	8563	112964	0.109091	0.0704617	0.691836	0.282229	0.847378
MA0090.2	TEAD1	TEA domain factors	TEF-1-related factors	6	49	21080	100447	0.109091	0.173459	-0.777246	0.283396	0.847378
MA0014.3	PAX5	Paired box factors	Paired domain only	6	49	21293	100234	0.109091	0.175212	-0.794812	0.284641	0.847378
MA0068.2	PAX4	Paired box factors	Paired plus homeo domain	4	51	4951	116576	0.0727273	0.0407399	0.885053	0.286986	0.847378
MA0665.1	MSC	Basic helix-loop-helix factors (bHLH)	Tal-related	18	37	32191	89336	0.327273	0.264888	0.433052	0.287682	0.847378
MA0051.1	IRF2	Tryptophan cluster factors	Interferon-regulatory factors	13	42	21829	99698	0.236364	0.179623	0.499434	0.290292	0.847378
MA0873.1	HOXD12	Homeo domain factors	HOX	4	51	5106	116421	0.0727273	0.0420154	0.838578	0.294118	0.847378
MA0864.1	E2F2	Fork headwinged helix factors	E2F	4	51	5112	116415	0.0727273	0.0420647	0.836809	0.294411	0.847378
MA0719.1	RHOXF1	Homeo domain factors	Paired-related HD factors	9	46	14452	107075	0.163636	0.11892	0.535632	0.296279	0.847378
MA0702.1	LMX1A	Homeo domain factors	HD-LIM	6	49	8964	112563	0.109091	0.0737614	0.620677	0.297434	0.847378
MA0703.1	LMX1B	Homeo domain factors	HD-LIM	6	49	8964	112563	0.109091	0.0737614	0.620677	0.297434	0.847378
MA0160.1	NR4A2	Nuclear receptors with C4 zinc fingers	NGFI-B-related receptors (NR4)	13	42	22290	99237	0.236364	0.183416	0.462598	0.297767	0.847378
MA0662.1	MIXL1	Homeo domain factors	Paired-related HD factors	6	49	9060	112467	0.109091	0.0745513	0.604079	0.301572	0.847491
MA0668.1	NEUROD2	Basic helix-loop-helix factors (bHLH)	Tal-related	6	49	9074	112453	0.109091	0.0746665	0.601671	0.30219	0.847491
MA0484.1	HNF4G	Nuclear receptors with C4 zinc fingers	RXR-related receptors (NR2)	20	35	36341	85186	0.363636	0.299036	0.421686	0.303938	0.847491
MA0644.1	ESX1	Homeo domain factors	Paired-related HD factors	6	49	9132	112395	0.109091	0.0751438	0.591735	0.304792	0.847491
MA0633.1	Twist2	Basic helix-loop-helix factors (bHLH)	Tal-related	9	46	14767	106760	0.163636	0.121512	0.500276	0.305215	0.847491
MA0019.1	Ddit3::Cebpa	Basic leucine zipper factors (bZIP)::Basic leucine zipper factors (bZIP)	CEBP-related::CEBP-related	4	51	15281	106246	0.0727273	0.125742	-0.87482	0.309322	0.851
MA0098.3	ETS1	Tryptophan cluster factors	Ets-related	4	51	15347	106180	0.0727273	0.126285	-0.881934	0.309455	0.851
MA0651.1	HOXC11	Homeo domain factors	HOX	4	51	5451	116076	0.0727273	0.0448542	0.739963	0.312873	0.85407
MA0732.1	EGR3	C2H2 zinc finger factors	Three-zinc finger Kruppel-related	21	34	38698	82829	0.381818	0.318431	0.402779	0.313557	0.85407
MA1118.1	SIX1	Homeo domain factors	HD-SINE	10	45	16068	105459	0.181818	0.132218	0.544485	0.315499	0.855287
MA1117.1	RELB	Rel homology region (RHR) factors	NF-kappaB-related factors	8	47	25577	95950	0.145455	0.210464	-0.647131	0.319598	0.858591
MA0501.1	MAF::NFE2	Basic leucine zipper factors (bZIP)::Basic leucine zipper factors (bZIP)	Maf-related::Jun-related	8	47	24804	96723	0.145455	0.204103	-0.591286	0.31972	0.858591
MA0827.1	OLIG3	Basic helix-loop-helix factors (bHLH)	Tal-related	2	53	9754	111773	0.0363636	0.080262	-1.20948	0.321273	0.858729
MA0108.2	TBP	TATA-binding proteins	TBP-related factors	2	53	10171	111356	0.0363636	0.0836933	-1.27527	0.324374	0.862986
MA0103.3	ZEB1	Homeo domain factors	HD-ZF factors	24	31	45129	76398	0.436364	0.37135	0.390212	0.330521	0.866499
MA0107.1	RELA	Rel homology region (RHR) factors	NF-kappaB-related factors	9	46	27520	94007	0.163636	0.226452	-0.581324	0.333704	0.866499
MA0506.1	NRF1	Basic leucine zipper factors (bZIP)	Jun-related	9	46	27532	93995	0.163636	0.22655	-0.582137	0.333715	0.866499
MA0838.1	CEBPG	Basic leucine zipper factors (bZIP)	CEBP-related	4	51	5808	115719	0.0727273	0.0477918	0.643988	0.335842	0.866499
MA0164.1	Nr2e3	Nuclear receptors with C4 zinc fingers	RXR-related receptors (NR2)	7	48	10824	110703	0.127273	0.0890666	0.576764	0.337135	0.866499
MA0735.1	GLIS1	C2H2 zinc finger factors	More than 3 adjacent zinc fingers	5	50	17749	103778	0.0909091	0.14605	-0.774229	0.338074	0.866499
MA0770.1	HSF2	Heat shock factors	HSF factors	5	50	17135	104392	0.0909091	0.140997	-0.714928	0.338111	0.866499
MA0743.1	SCRT1	C2H2 zinc finger factors	More than 3 adjacent zinc fingers	5	50	18089	103438	0.0909091	0.148848	-0.806337	0.340394	0.866499
MA0137.3	STAT1	STAT domain factors	STAT factors	16	39	28656	92871	0.290909	0.235799	0.410985	0.34125	0.866499
MA0714.1	PITX3	Homeo domain factors	Paired-related HD factors	7	48	11011	110516	0.127273	0.0906054	0.549614	0.342358	0.866499
MA0908.1	HOXD11	Homeo domain factors	HOX	4	51	5937	115590	0.0727273	0.0488533	0.610682	0.344888	0.866618
MA0152.1	NFATC2	Rel homology region (RHR) factors	NFAT-related factors	10	45	29451	92076	0.181818	0.242341	-0.525388	0.34695	0.866618
MA0787.1	POU3F2	Homeo domain factors	POU domain factors	11	44	18937	102590	0.2	0.155825	0.437604	0.353104	0.878153
MA0643.1	Esrrg	Nuclear receptors with C4 zinc fingers	Steroid hormone receptors (NR3)	11	44	19064	102463	0.2	0.15687	0.426175	0.355785	0.879139
MA0154.3	EBF1	Rel homology region (RHR) factors	Early B-Cell Factor-related factors	17	38	31101	90426	0.309091	0.255918	0.379308	0.356574	0.879139
MA0689.1	TBX20	T-Box factors	TBX1-related factors	6	49	19579	101948	0.109091	0.161108	-0.649284	0.36126	0.880941
MA0802.1	TBR1	T-Box factors	TBrain-related factors	6	49	19382	102145	0.109091	0.159487	-0.63191	0.361805	0.880941
MA0100.3	MYB	Tryptophan cluster factors	MybSANT domain factors	6	49	19354	102173	0.109091	0.159257	-0.629429	0.361925	0.880941
MA0884.1	DUXA	Homeo domain factors	Paired-related HD factors	3	52	11945	109582	0.0545455	0.0982909	-0.917939	0.366759	0.883023
MA0626.1	Npas2	Basic helix-loop-helix factors (bHLH)	PAS domain factors	3	52	11856	109671	0.0545455	0.0975586	-0.905978	0.366804	0.883023
MA0117.2	Mafb	Basic leucine zipper factors (bZIP)	Maf-related	12	43	20665	100862	0.218182	0.170045	0.445813	0.367412	0.883023
MA0818.1	BHLHE22	Basic helix-loop-helix factors (bHLH)	Tal-related	1	54	6883	114644	0.0181818	0.0566376	-1.6969	0.373861	0.894763
MA0888.1	EVX2	Homeo domain factors	HOX	5	50	7315	114212	0.0909091	0.0601924	0.642759	0.384036	0.911809
MA0851.1	Foxj3	Fork headwinged helix factors	FOX	13	42	22730	98797	0.236364	0.187037	0.427987	0.385403	0.911809
MA0887.1	EVX1	Homeo domain factors	HOX	5	50	7372	114155	0.0909091	0.0606614	0.630839	0.385765	0.911809
MA1124.1	ZNF24	C2H2 zinc finger factors	More than 3 adjacent zinc fingers	13	42	23118	98409	0.236364	0.190229	0.397892	0.389923	0.915833
MA0758.1	E2F7	Fork headwinged helix factors	E2F	8	47	13556	107971	0.145455	0.111547	0.439043	0.391718	0.915833
MA0910.1	Hoxd8	Homeo domain factors	HOX	8	47	13575	107952	0.145455	0.111704	0.436768	0.392271	0.915833
MA0694.1	ZBTB7B	C2H2 zinc finger factors	More than 3 adjacent zinc fingers	8	47	24747	96780	0.145455	0.203634	-0.587117	0.400938	0.919137
MA0122.2	NKX3-2	Homeo domain factors	NK	4	51	14548	106979	0.0727273	0.11971	-0.793984	0.403774	0.919137
MA0468.1	DUX4	Homeo domain factors	Paired-related HD factors	4	51	14622	106905	0.0727273	0.120319	-0.802302	0.404279	0.919137
MA0124.2	Nkx3-1	Homeo domain factors	NK	4	51	14696	106831	0.0727273	0.120928	-0.810584	0.404874	0.919137
MA0508.2	PRDM1	C2H2 zinc finger factors	More than 3 adjacent zinc fingers	14	41	25297	96230	0.254545	0.20816	0.37732	0.406132	0.919137
MA0157.2	FOXO3	Fork headwinged helix factors	FOX	9	46	14943	106584	0.163636	0.12296	0.480803	0.407552	0.919137
MA0525.2	TP63	p53 domain factors	p53-related factors	5	50	7956	113571	0.0909091	0.0654669	0.51346	0.408109	0.919137
MA0155.1	INSM1	C2H2 zinc finger factors	Factors with multiple dispersed zinc fingers	24	31	46534	74993	0.436364	0.382911	0.319216	0.409225	0.919137
MA1116.1	RBPJ	Rel homology region (RHR) factors	CSL-related factors	18	37	46622	74905	0.327273	0.383635	-0.355449	0.409755	0.919137
MA0092.1	Hand1::Tcf3	Basic helix-loop-helix factors (bHLH)::Basic helix-loop-helix factors (bHLH)	Tal-related::E2A	9	46	26255	95272	0.163636	0.216043	-0.494162	0.414305	0.924462
MA0595.1	SREBF1	Basic helix-loop-helix factors (bHLH)	bHLH-ZIP	9	46	26898	94629	0.163636	0.221334	-0.538834	0.415569	0.924462
MA0593.1	FOXP2	Fork headwinged helix factors	FOX	15	40	27115	94412	0.272727	0.223119	0.384838	0.416978	0.924462
MA0774.1	MEIS2	Homeo domain factors	TALE-type homeo domain factors	15	40	27837	93690	0.272727	0.22906	0.335851	0.424828	0.937687
MA0135.1	Lhx3	Homeo domain factors	HD-LIM	9	46	15898	105629	0.163636	0.130819	0.378446	0.426222	0.937687
MA0652.1	IRF8	Tryptophan cluster factors	Interferon-regulatory factors	5	50	16952	104575	0.0909091	0.139492	-0.696911	0.433707	0.9505
MA0756.1	ONECUT2	Homeo domain factors	HD-CUT	2	53	9052	112475	0.0363636	0.0744855	-1.09269	0.437298	0.954711
MA0080.4	SPI1	Tryptophan cluster factors	Ets-related	11	44	30763	90764	0.2	0.253137	-0.439052	0.439082	0.954962
MA1149.1	RARA::RXRG	Nuclear receptors with C4 zinc fingers::Nuclear receptors with C4 zinc fingers	Thyroid hormone receptor-related factors (NR1)::RXR-related receptors (NR2)	17	38	31946	89581	0.309091	0.262872	0.327114	0.444628	0.956921
MA1112.1	NR4A1	Nuclear receptors with C4 zinc fingers	NGFI-B-related receptors (NR4)	10	45	17792	103735	0.181818	0.146404	0.373672	0.445002	0.956921
MA0901.1	HOXB13	Homeo domain factors	HOX	10	45	17998	103529	0.181818	0.148099	0.354197	0.449125	0.958841
MA0518.1	Stat4	STAT domain factors	STAT factors	12	43	32969	88558	0.218182	0.27129	-0.41576	0.449247	0.958841
MA0497.1	MEF2C	MADS box factors	Regulators of differentiation	13	42	35259	86268	0.236364	0.290133	-0.401005	0.458119	0.965862
MA0526.2	USF2	Basic helix-loop-helix factors (bHLH)	bHLH-ZIP	6	49	19295	102232	0.109091	0.158771	-0.624191	0.458268	0.965862
MA1106.1	HIF1A	Basic helix-loop-helix factors (bHLH)	PAS domain factors	6	49	10092	111435	0.109091	0.0830433	0.43516	0.459454	0.965862
MA0666.1	MSX1	Homeo domain factors	NK	6	49	10107	111420	0.109091	0.0831667	0.432823	0.45993	0.965862
MA0069.1	PAX6	Paired box factors	Paired plus homeo domain	6	49	10160	111367	0.109091	0.0836028	0.424591	0.461643	0.965862
MA0891.1	GSC2	Homeo domain factors	Paired-related HD factors	6	49	10191	111336	0.109091	0.0838579	0.419795	0.462668	0.965862
MA0745.1	SNAI2	C2H2 zinc finger factors	More than 3 adjacent zinc fingers	19	36	36675	84852	0.345455	0.301785	0.288111	0.466031	0.968181
MA0856.1	RXRG	Nuclear receptors with C4 zinc fingers	RXR-related receptors (NR2)	11	44	20063	101464	0.2	0.165091	0.338355	0.468096	0.968181
MA0907.1	HOXC13	Homeo domain factors	HOX	6	49	10415	111112	0.109091	0.0857011	0.385528	0.47055	0.968181
MA1131.1	FOSL2::JUN	Basic leucine zipper factors (bZIP)::Basic leucine zipper factors (bZIP)	Fos-related::Jun-related	6	49	10415	111112	0.109091	0.0857011	0.385528	0.47055	0.968181
MA0751.1	ZIC4	C2H2 zinc finger factors	More than 3 adjacent zinc fingers	16	39	41770	79757	0.290909	0.34371	-0.352304	0.478706	0.975072
MA0156.2	FEV	Tryptophan cluster factors	Ets-related	3	52	11038	110489	0.0545455	0.0908276	-0.792094	0.482133	0.975072
MA0753.1	ZNF740	C2H2 zinc finger factors	Other factors with up to three adjacent zinc fingers	17	38	43749	77778	0.309091	0.359994	-0.330391	0.484258	0.975072
MA0063.1	Nkx2-5	Homeo domain factors	NK	3	52	11514	110013	0.0545455	0.0947444	-0.859255	0.485492	0.975072
MA0028.2	ELK1	Tryptophan cluster factors	Ets-related	3	52	11572	109955	0.0545455	0.0952216	-0.867268	0.48619	0.975072
MA0759.1	ELK3	Tryptophan cluster factors	Ets-related	3	52	11600	109927	0.0545455	0.095452	-0.871122	0.486549	0.975072
MA0620.2	MITF	Basic helix-loop-helix factors (bHLH)	bHLH-ZIP	3	52	11601	109926	0.0545455	0.0954603	-0.87126	0.486562	0.975072
MA0685.1	SP4	C2H2 zinc finger factors	Three-zinc finger Kruppel-related	23	32	45188	76339	0.418182	0.371835	0.280025	0.487536	0.975072
MA0259.1	ARNT::HIF1A	Basic helix-loop-helix factors (bHLH)::Basic helix-loop-helix factors (bHLH)	PAS domain factors::PAS domain factors	7	48	11931	109596	0.127273	0.0981757	0.421792	0.491897	0.977358
MA0842.1	NRL	Basic leucine zipper factors (bZIP)	Maf-related	12	43	22656	98871	0.218182	0.186428	0.28431	0.493241	0.977358
MA0139.1	CTCF	C2H2 zinc finger factors	More than 3 adjacent zinc fingers	24	31	59611	61916	0.436364	0.490517	-0.314495	0.500395	0.977358
MA0870.1	Sox1	High-mobility group (HMG) domain factors	SOX-related factors	7	48	12341	109186	0.127273	0.101549	0.367644	0.500934	0.977358
MA1102.1	CTCFL	C2H2 zinc finger factors	More than 3 adjacent zinc fingers	25	30	61315	60212	0.454545	0.504538	-0.289218	0.501389	0.977358
MA0163.1	PLAG1	C2H2 zinc finger factors	More than 3 adjacent zinc fingers	24	31	59092	62435	0.436364	0.486246	-0.289837	0.501416	0.977358
MA0747.1	SP8	C2H2 zinc finger factors	Three-zinc finger Kruppel-related	28	27	56221	65306	0.509091	0.462621	0.268568	0.501895	0.977358
MA0780.1	PAX3	Paired box factors	Paired plus homeo domain	3	52	5100	116427	0.0545455	0.041966	0.397302	0.50248	0.977358
MA0520.1	Stat6	STAT domain factors	STAT factors	13	42	24584	96943	0.236364	0.202292	0.287537	0.504057	0.977358
MA0730.1	RARA	Nuclear receptors with C4 zinc fingers	Thyroid hormone receptor-related factors (NR1)	14	41	25937	95590	0.254545	0.213426	0.331648	0.509373	0.982196
MA0472.2	EGR2	C2H2 zinc finger factors	Three-zinc finger Kruppel-related	14	41	26733	94794	0.254545	0.219976	0.275985	0.516879	0.982196
MA0485.1	Hoxc9	Homeo domain factors	HOX	4	51	13211	108316	0.0727273	0.108708	-0.636986	0.517121	0.982196
MA0528.1	ZNF263	C2H2 zinc finger factors	More than 3 adjacent zinc fingers	41	14	94651	26876	0.745455	0.778847	-0.266118	0.518811	0.982196
MA0839.1	CREB3L1	Basic leucine zipper factors (bZIP)	CREB-related factors	4	51	13636	107891	0.0727273	0.112206	-0.688338	0.51898	0.982196
MA0843.1	TEF	Basic leucine zipper factors (bZIP)	CEBP-related	1	54	5355	116172	0.0181818	0.0440643	-1.31565	0.519794	0.982196
MA0024.3	E2F1	Fork headwinged helix factors	E2F	1	54	5553	115974	0.0181818	0.0456935	-1.37049	0.520051	0.982196
MA0150.2	Nfe2l2	Basic leucine zipper factors (bZIP)	Jun-related	10	45	27645	93882	0.181818	0.22748	-0.406082	0.520289	0.982196
MA0095.2	YY1	C2H2 zinc finger factors	More than 3 adjacent zinc fingers	15	40	28388	93139	0.272727	0.233594	0.299073	0.523409	0.984835
MA0604.1	Atf1	Basic leucine zipper factors (bZIP)	CREB-related factors	1	54	6247	115280	0.0181818	0.0514042	-1.54904	0.531386	0.993699
MA1122.1	TFDP1	Fork headwinged helix factors	E2F	11	44	29482	92045	0.2	0.242596	-0.357482	0.531594	0.993699
MA0614.1	Foxj2	Fork headwinged helix factors	FOX	8	47	14633	106894	0.145455	0.120409	0.314291	0.533845	0.994657
MA0601.1	Arid3b	ARID	ARID-related	8	47	14910	106617	0.145455	0.122689	0.283493	0.540268	0.999319
MA0140.2	GATA1::TAL1	Other C4 zinc finger-type factors::Basic helix-loop-helix factors (bHLH)	C4-GATA-related::Tal-related	8	47	15066	106461	0.145455	0.123972	0.266364	0.544274	0.999319
MA0502.1	NFYB	Heteromeric CCAAT-binding factors	Heteromeric CCAAT-binding	5	50	15354	106173	0.0909091	0.126342	-0.532193	0.544655	0.999319
MA0906.1	HOXC12	Homeo domain factors	HOX	4	51	6669	114858	0.0727273	0.0548767	0.433796	0.544997	0.999319
MA0669.1	NEUROG2	Basic helix-loop-helix factors (bHLH)	Tal-related	5	50	15128	106399	0.0909091	0.124483	-0.507732	0.545083	0.999319
MA0104.4	MYCN	Basic helix-loop-helix factors (bHLH)	bHLH-ZIP	5	50	16095	105432	0.0909091	0.13244	-0.610294	0.548073	1
MA1110.1	NR1H4	Nuclear receptors with C4 zinc fingers	Thyroid hormone receptor-related factors (NR1)	9	46	16361	105166	0.163636	0.134629	0.330694	0.551058	1
MA0119.1	NFIC::TLX1	SMADNF-1 DNA-binding domain factors::Homeo domain factors	Nuclear factor 1::NK	18	37	35167	86360	0.327273	0.289376	0.256574	0.552729	1
MA0811.1	TFAP2B	Basic helix-span-helix factors (bHSH)	AP-2	15	40	38489	83038	0.272727	0.316712	-0.305681	0.563029	1
MA0895.1	HMBOX1	Homeo domain factors	POU domain factors	4	51	7128	114399	0.0727273	0.0586536	0.332003	0.56405	1
MA0071.1	RORA	Nuclear receptors with C4 zinc fingers	Thyroid hormone receptor-related factors (NR1)	6	49	17623	103904	0.109091	0.145013	-0.470023	0.566916	1
MA0878.1	CDX1	Homeo domain factors	HOX	6	49	17416	104111	0.109091	0.14331	-0.450106	0.567116	1
MA0744.1	SCRT2	C2H2 zinc finger factors	More than 3 adjacent zinc fingers	6	49	17960	103567	0.109091	0.147786	-0.502037	0.567661	1
MA0676.1	Nr2e1	Nuclear receptors with C4 zinc fingers	RXR-related receptors (NR2)	6	49	18088	103439	0.109091	0.148839	-0.514066	0.568285	1
MA0733.1	EGR4	C2H2 zinc finger factors	Three-zinc finger Kruppel-related	20	35	40056	81471	0.363636	0.329606	0.216897	0.569752	1
MA0830.1	TCF4	Basic helix-loop-helix factors (bHLH)	E2A	21	34	41782	79745	0.381818	0.343808	0.23735	0.57137	1
MA0605.1	Atf3	Basic leucine zipper factors (bZIP)	Fos-related	4	51	7373	114154	0.0727273	0.0606696	0.280156	0.575688	1
MA0636.1	BHLHE41	Basic helix-loop-helix factors (bHLH)	Hairy-related factors	2	53	7687	113840	0.0363636	0.0632534	-0.839516	0.582911	1
MA0826.1	OLIG1	Basic helix-loop-helix factors (bHLH)	Tal-related	2	53	7696	113831	0.0363636	0.0633275	-0.841318	0.582918	1
MA0817.1	BHLHE23	Basic helix-loop-helix factors (bHLH)	Tal-related	2	53	7534	113993	0.0363636	0.0619945	-0.80857	0.583099	1
MA0663.1	MLX	Basic helix-loop-helix factors (bHLH)	bHLH-ZIP	2	53	8104	113423	0.0363636	0.0666848	-0.921036	0.585203	1
MA0796.1	TGIF1	Homeo domain factors	TALE-type homeo domain factors	7	48	19897	101630	0.127273	0.163725	-0.424899	0.585308	1
MA0786.1	POU3F1	Homeo domain factors	POU domain factors	10	45	19432	102095	0.181818	0.159899	0.223444	0.585318	1
MA0141.3	ESRRB	Nuclear receptors with C4 zinc fingers	Steroid hormone receptors (NR3)	7	48	19934	101593	0.127273	0.164029	-0.428105	0.585344	1
MA0619.1	LIN54	CRC domain		7	48	19979	101548	0.127273	0.1644	-0.431997	0.585406	1
MA0512.2	Rxra	Nuclear receptors with C4 zinc fingers	RXR-related receptors (NR2)	11	44	20662	100865	0.2	0.17002	0.287342	0.588866	1
MA0471.1	E2F6	Fork headwinged helix factors	E2F	23	32	56010	65517	0.418182	0.460885	-0.25025	0.589287	1
MA0855.1	RXRB	Nuclear receptors with C4 zinc fingers	RXR-related receptors (NR2)	11	44	20825	100702	0.2	0.171361	0.273669	0.590355	1
MA0741.1	KLF16	C2H2 zinc finger factors	Three-zinc finger Kruppel-related	29	26	59159	62368	0.527273	0.486797	0.233746	0.590763	1
MA1113.1	PBX2	Homeo domain factors	TALE-type homeo domain factors	11	44	21063	100464	0.2	0.17332	0.253857	0.592968	1
MA0027.2	EN1	Homeo domain factors	NK	5	50	8628	112899	0.0909091	0.0709966	0.387929	0.593406	1
MA1119.1	SIX2	Homeo domain factors	HD-SINE	11	44	21253	100274	0.2	0.174883	0.238167	0.595417	1
MA0009.2	TBXT	T-Box factors	Brachyury-related factors	5	50	8932	112595	0.0909091	0.0734981	0.334083	0.600487	1
MA0801.1	MGA	T-Box factors	TBX6-related factors	8	47	22035	99492	0.145455	0.181318	-0.3798	0.600674	1
MA0729.1	RARA	Nuclear receptors with C4 zinc fingers	Thyroid hormone receptor-related factors (NR1)	8	47	21681	99846	0.145455	0.178405	-0.351311	0.601272	1
MA0734.1	GLI2	C2H2 zinc finger factors	More than 3 adjacent zinc fingers	8	47	22672	98855	0.145455	0.186559	-0.430179	0.602484	1
MA0147.3	MYC	Basic helix-loop-helix factors (bHLH)	bHLH-ZIP	12	43	23063	98464	0.218182	0.189777	0.252667	0.605395	1
MA0038.1	Gfi1	C2H2 zinc finger factors	More than 3 adjacent zinc fingers	12	43	23361	98166	0.218182	0.192229	0.229768	0.608453	1
MA0773.1	MEF2D	MADS box factors	Regulators of differentiation	12	43	23726	97801	0.218182	0.195232	0.202122	0.613156	1
MA1421.1	TCF7L1	High-mobility group (HMG) domain factors	TCF-7-related factors	9	46	23992	97535	0.163636	0.197421	-0.330265	0.61403	1
MA0819.1	CLOCK	Basic helix-loop-helix factors (bHLH)	PAS domain factors	5	50	9611	111916	0.0909091	0.0790853	0.219655	0.621377	1
MA0125.1	Nobox	Homeo domain factors	Paired-related HD factors	5	50	9641	111886	0.0909091	0.0793322	0.214772	0.622437	1
MA0162.3	EGR1	C2H2 zinc finger factors	Three-zinc finger Kruppel-related	10	45	26276	95251	0.181818	0.216215	-0.31193	0.625072	1
MA0828.1	SREBF2	Basic helix-loop-helix factors (bHLH)	bHLH-ZIP	3	52	10318	111209	0.0545455	0.0849029	-0.68538	0.626177	1
MA0885.1	Dlx2	Homeo domain factors	NK	3	52	10367	111160	0.0545455	0.0853061	-0.692853	0.626551	1
MA0603.1	Arntl	Basic helix-loop-helix factors (bHLH)	PAS domain factors	3	52	10448	111079	0.0545455	0.0859727	-0.705135	0.627253	1
MA0832.1	Tcf21	Basic helix-loop-helix factors (bHLH)	Tal-related	14	41	27425	94102	0.254545	0.22567	0.22858	0.628341	1
MA0829.1	Srebf1	Basic helix-loop-helix factors (bHLH)	bHLH-ZIP	3	52	10670	110857	0.0545455	0.0877994	-0.738363	0.629696	1
MA0831.2	TFE3	Basic helix-loop-helix factors (bHLH)	bHLH-ZIP	3	52	10673	110854	0.0545455	0.0878241	-0.738808	0.629734	1
MA0621.1	mix-a	Homeo domain factors	Paired-related HD factors	6	49	10719	110808	0.109091	0.0882026	0.340068	0.630374	1
MA0602.1	Arid5a	ARID	ARID-related	6	49	11067	110460	0.109091	0.0910662	0.289437	0.635898	1
MA0480.1	Foxo1	Fork headwinged helix factors	FOX	15	40	30129	91398	0.272727	0.24792	0.185944	0.641709	1
MA1101.1	BACH2	Basic leucine zipper factors (bZIP)	Jun-related	12	43	30459	91068	0.218182	0.250636	-0.261219	0.643582	1
MA0606.1	NFAT5	Rel homology region (RHR) factors	NFAT-related factors	15	40	30331	91196	0.272727	0.249582	0.173162	0.643788	1
MA0629.1	Rhox11	Homeo domain factors	Paired-related HD factors	6	49	11541	109986	0.109091	0.0949666	0.22273	0.645933	1
MA1418.1	IRF3	Tryptophan cluster factors	Interferon-regulatory factors	16	39	31989	89538	0.290909	0.263225	0.199493	0.646774	1
MA0161.2	NFIC	SMADNF-1 DNA-binding domain factors	Nuclear factor 1	13	42	33122	88405	0.236364	0.272548	-0.275527	0.650208	1
MA0081.1	SPIB	Tryptophan cluster factors	Ets-related	13	42	33328	88199	0.236364	0.274244	-0.287836	0.650348	1
MA0511.2	RUNX2	Runt domain factors	Runt-related factors	4	51	12072	109455	0.0727273	0.099336	-0.491789	0.654627	1
MA0825.1	MNT	Basic helix-loop-helix factors (bHLH)	bHLH-ZIP	4	51	11992	109535	0.0727273	0.0986777	-0.481139	0.654711	1
MA0914.1	ISL2	Homeo domain factors	HD-LIM	4	51	12429	109098	0.0727273	0.102274	-0.538566	0.655303	1
MA0898.1	Hmx3	Homeo domain factors	NK	4	51	12474	109053	0.0727273	0.102644	-0.544377	0.655507	1
MA0781.1	PAX9	Paired box factors	Paired domain only	4	51	12558	108969	0.0727273	0.103335	-0.555176	0.655958	1
MA0074.1	RXRA::VDR	Nuclear receptors with C4 zinc fingers::Nuclear receptors with C4 zinc fingers	RXR-related receptors (NR2)::Thyroid hormone receptor-related factors (NR1)	4	51	12868	108659	0.0727273	0.105886	-0.594473	0.65838	1
MA0823.1	HEY1	Basic helix-loop-helix factors (bHLH)	Hairy-related factors	7	48	12961	108566	0.127273	0.106651	0.288712	0.659365	1
MA0003.3	TFAP2A	Basic helix-span-helix factors (bHSH)	AP-2	15	40	37746	83781	0.272727	0.310598	-0.264718	0.662167	1
MA0018.3	CREB1	Basic leucine zipper factors (bZIP)	CREB-related factors	7	48	13453	108074	0.127273	0.1107	0.228408	0.666035	1
MA0707.1	MNX1	Homeo domain factors	HOX	7	48	13476	108051	0.127273	0.110889	0.225635	0.66641	1
MA0814.1	TFAP2C	Basic helix-span-helix factors (bHSH)	AP-2	16	39	39688	81839	0.290909	0.326578	-0.241296	0.666848	1
MA0682.1	Pitx1	Homeo domain factors	Paired-related HD factors	7	48	13531	107996	0.127273	0.111342	0.219022	0.667329	1
MA0871.1	TFEC	Basic helix-loop-helix factors (bHLH)	bHLH-ZIP	5	50	14372	107155	0.0909091	0.118262	-0.423558	0.677451	1
MA1146.1	NR1H4::RXRA	Nuclear receptors with C4 zinc fingers::Nuclear receptors with C4 zinc fingers	Thyroid hormone receptor-related factors (NR1)::RXR-related receptors (NR2)	5	50	14614	106913	0.0909091	0.120253	-0.45091	0.677891	1
MA0516.1	SP2	C2H2 zinc finger factors	Three-zinc finger Kruppel-related	33	22	76138	45389	0.6	0.626511	-0.161306	0.678144	1
MA1125.1	ZNF384	C2H2 zinc finger factors	More than 3 adjacent zinc fingers	22	33	45478	76049	0.4	0.374221	0.156793	0.678688	1
MA1151.1	RORC	Nuclear receptors with C4 zinc fingers	Thyroid hormone receptor-related factors (NR1)	8	47	15340	106187	0.145455	0.126227	0.236635	0.682881	1
MA0613.1	FOXG1	Fork headwinged helix factors	FOX	8	47	15358	106169	0.145455	0.126375	0.234698	0.68307	1
MA0771.1	HSF4	Heat shock factors	HSF factors	6	49	16540	104987	0.109091	0.136101	-0.363565	0.695446	1
MA0792.1	POU5F1B	Homeo domain factors	POU domain factors	6	49	16768	104759	0.109091	0.137978	-0.386452	0.695681	1
MA0655.1	JDP2	Basic leucine zipper factors (bZIP)	Fos-related	6	49	17085	104442	0.109091	0.140586	-0.417844	0.696786	1
MA0650.1	HOXA13	Homeo domain factors	HOX	7	48	18758	102769	0.127273	0.154353	-0.323777	0.710038	1
MA0805.1	TBX1	T-Box factors	TBX1-related factors	7	48	19084	102443	0.127273	0.157035	-0.353218	0.710463	1
MA0806.1	TBX4	T-Box factors	TBX2-related factors	7	48	19084	102443	0.127273	0.157035	-0.353218	0.710463	1
MA0788.1	POU3F3	Homeo domain factors	POU domain factors	10	45	19495	102032	0.181818	0.160417	0.217882	0.712182	1
MA0481.2	FOXP1	Fork headwinged helix factors	FOX	10	45	20339	101188	0.181818	0.167362	0.144828	0.719492	1
MA0778.1	NFKB2	Rel homology region (RHR) factors	NF-kappaB-related factors	11	44	22586	98941	0.2	0.185852	0.131166	0.730816	1
MA0624.1	NFATC1	Rel homology region (RHR) factors	NFAT-related factors	9	46	23568	97959	0.163636	0.193932	-0.298284	0.732688	1
MA0680.1	PAX7	Paired box factors	Paired plus homeo domain	3	52	5531	115996	0.0545455	0.0455125	0.274909	0.739469	1
MA0596.1	SREBF2	Basic helix-loop-helix factors (bHLH)	bHLH-ZIP	10	45	25194	96333	0.181818	0.207312	-0.234972	0.740934	1
MA0783.1	PKNOX2	Homeo domain factors	TALE-type homeo domain factors	10	45	25625	95902	0.181818	0.210858	-0.265912	0.740971	1
MA0142.1	Pou5f1::Sox2	Homeo domain factors::High-mobility group (HMG) domain factors	POU domain factors::SOX-related factors	10	45	25111	96416	0.181818	0.206629	-0.228969	0.741048	1
MA1121.1	TEAD2	TEA domain factors	TEF-1-related factors	13	42	26057	95470	0.236364	0.214413	0.181531	0.742062	1
MA0836.1	CEBPD	Basic leucine zipper factors (bZIP)	CEBP-related	3	52	5727	115800	0.0545455	0.0471253	0.222231	0.744627	1
MA0466.2	CEBPB	Basic leucine zipper factors (bZIP)	CEBP-related	3	52	5767	115760	0.0545455	0.0474545	0.211691	0.745746	1
MA0711.1	OTX1	Homeo domain factors	Paired-related HD factors	3	52	5996	115531	0.0545455	0.0493388	0.152657	0.752538	1
MA0837.1	CEBPE	Basic leucine zipper factors (bZIP)	CEBP-related	3	52	6013	115514	0.0545455	0.0494787	0.148357	0.753067	1
MA0509.1	Rfx1	Fork headwinged helix factors	RFX-related factors	12	43	30340	91187	0.218182	0.249656	-0.253688	0.755184	1
MA0671.1	NFIX	SMADNF-1 DNA-binding domain factors	Nuclear factor 1	15	40	31188	90339	0.272727	0.256634	0.119332	0.758947	1
MA0704.1	Lhx4	Homeo domain factors	HD-LIM	3	52	6231	115296	0.0545455	0.0512726	0.0943039	0.7601	1
MA0463.1	Bcl6	C2H2 zinc finger factors	More than 3 adjacent zinc fingers	16	39	33596	87931	0.290909	0.276449	0.102688	0.765405	1
MA0258.2	ESR2	Nuclear receptors with C4 zinc fingers	Steroid hormone receptors (NR3)	15	40	35802	85725	0.272727	0.294601	-0.155357	0.769798	1
MA0679.1	ONECUT1	Homeo domain factors	HD-CUT	2	53	7081	114446	0.0363636	0.0582669	-0.713374	0.771176	1
MA0840.1	Creb5	Basic leucine zipper factors (bZIP)	CREB-related factors	2	53	7191	114336	0.0363636	0.059172	-0.737003	0.772033	1
MA0853.1	Alx4	Homeo domain factors	Paired-related HD factors	2	53	7268	114259	0.0363636	0.0598056	-0.753343	0.772733	1
MA0740.1	KLF14	C2H2 zinc finger factors	Three-zinc finger Kruppel-related	16	39	39032	82495	0.290909	0.32118	-0.20574	0.772818	1
MA0696.1	ZIC1	C2H2 zinc finger factors	More than 3 adjacent zinc fingers	20	35	42105	79422	0.363636	0.346466	0.108189	0.778432	1
MA0647.1	GRHL1	Grainyhead domain factors	Grainyhead-related factors	4	51	7821	113706	0.0727273	0.0643561	0.189384	0.77998	1
MA0067.1	Pax2	Paired box factors	Paired domain only	4	51	7924	113603	0.0727273	0.0652036	0.169201	0.781707	1
MA1143.1	FOSL1::JUND	Basic leucine zipper factors (bZIP)::Basic leucine zipper factors (bZIP)	Fos-related::Jun-related	4	51	7926	113601	0.0727273	0.0652201	0.168811	0.781741	1
MA1109.1	NEUROD1	Basic helix-loop-helix factors (bHLH)	Tal-related	22	33	46310	75217	0.4	0.381068	0.11477	0.782413	1
MA0879.1	Dlx1	Homeo domain factors	NK	4	51	8082	113445	0.0727273	0.0665037	0.138689	0.784558	1
MA0905.1	HOXC10	Homeo domain factors	HOX	4	51	8169	113358	0.0727273	0.0672196	0.122123	0.786227	1
MA0678.1	OLIG2	Basic helix-loop-helix factors (bHLH)	Tal-related	4	51	8280	113247	0.0727273	0.068133	0.101319	0.788451	1
MA1107.1	KLF9	C2H2 zinc finger factors	Three-zinc finger Kruppel-related	27	28	61899	59628	0.490909	0.509344	-0.106354	0.789315	1
MA0656.1	JDP2	Basic leucine zipper factors (bZIP)	Fos-related	4	51	8382	113145	0.0727273	0.0689723	0.0823414	0.790583	1
MA0902.1	HOXB2	Homeo domain factors	HOX	4	51	8657	112870	0.0727273	0.0712352	0.0322315	0.796711	1
MA0025.1	NFIL3	Basic leucine zipper factors (bZIP)	CEBP-related	3	52	8780	112747	0.0545455	0.0722473	-0.432779	0.797114	1
MA0464.2	BHLHE40	Basic helix-loop-helix factors (bHLH)	Hairy-related factors	3	52	9507	112020	0.0545455	0.0782295	-0.556903	0.79947	1
MA0875.1	BARX1	Homeo domain factors	NK	5	50	10535	110992	0.0909091	0.0866886	0.0752895	0.811071	1
MA0903.1	HOXB3	Homeo domain factors	HOX	5	50	10670	110857	0.0909091	0.0877994	0.0551534	0.813164	1
MA0896.1	Hmx1	Homeo domain factors	NK	4	51	11032	110495	0.0727273	0.0907782	-0.34825	0.815956	1
MA0046.2	HNF1A	Homeo domain factors	POU domain factors	6	49	12146	109381	0.109091	0.0999449	0.141024	0.820627	1
MA0106.3	TP53	p53 domain factors	p53-related factors	6	49	12721	108806	0.109091	0.104676	0.0667437	0.826324	1
MA0616.1	Hes2	Basic helix-loop-helix factors (bHLH)	Hairy-related factors	5	50	13342	108185	0.0909091	0.109786	-0.302423	0.829843	1
MA0760.1	ERF	Tryptophan cluster factors	Ets-related	5	50	13499	108028	0.0909091	0.111078	-0.321403	0.830007	1
MA0757.1	ONECUT3	Homeo domain factors	HD-CUT	5	50	13630	107897	0.0909091	0.112156	-0.337093	0.830263	1
MA1419.1	IRF4	Tryptophan cluster factors	Interferon-regulatory factors	5	50	14066	107461	0.0909091	0.115744	-0.388385	0.831862	1
MA1147.1	NR4A2::RXRA	Nuclear receptors with C4 zinc fingers::Nuclear receptors with C4 zinc fingers	NGFI-B-related receptors (NR4)::RXR-related receptors (NR2)	6	49	15503	106024	0.109091	0.127568	-0.25594	0.840505	1
MA1150.1	RORB	Nuclear receptors with C4 zinc fingers	Thyroid hormone receptor-related factors (NR1)	6	49	15718	105809	0.109091	0.129338	-0.278751	0.840667	1
MA1099.1	Hes1	Basic helix-loop-helix factors (bHLH)	Hairy-related factors	8	47	16284	105243	0.145455	0.133995	0.137652	0.84223	1
MA0060.3	NFYA	Other alpha	NFY	8	47	16336	105191	0.145455	0.134423	0.132337	0.842451	1
MA0789.1	POU3F4	Homeo domain factors	POU domain factors	8	47	16699	104828	0.145455	0.13741	0.0956258	0.844345	1
MA0822.1	HES7	Basic helix-loop-helix factors (bHLH)	Hairy-related factors	8	47	16975	104552	0.145455	0.139681	0.0681615	0.846171	1
MA0868.1	SOX8	High-mobility group (HMG) domain factors	SOX-related factors	7	48	17752	103775	0.127273	0.146075	-0.230186	0.849018	1
MA1132.1	JUN::JUNB	Basic leucine zipper factors (bZIP)::Basic leucine zipper factors (bZIP)	Jun-related::Jun-related	7	48	17491	104036	0.127273	0.143927	-0.205176	0.849084	1
MA0102.3	CEBPA	Basic leucine zipper factors (bZIP)	CEBP-related	7	48	17928	103599	0.127273	0.147523	-0.246882	0.849146	1
MA0627.1	Pou2f3	Homeo domain factors	POU domain factors	7	48	18023	103504	0.127273	0.148304	-0.25583	0.849272	1
MA0858.1	Rarb	Nuclear receptors with C4 zinc fingers	Thyroid hormone receptor-related factors (NR1)	9	46	18616	102911	0.163636	0.153184	0.113173	0.850937	1
MA0607.1	Bhlha15	Basic helix-loop-helix factors (bHLH)	Tal-related	9	46	18652	102875	0.163636	0.15348	0.10988	0.851084	1
MA0800.1	EOMES	T-Box factors	TBrain-related factors	9	46	19040	102487	0.163636	0.156673	0.074712	0.852993	1
MA0693.2	VDR	Nuclear receptors with C4 zinc fingers	Thyroid hormone receptor-related factors (NR1)	9	46	19227	102300	0.163636	0.158212	0.057972	0.854113	1
MA0672.1	NKX2-3	Homeo domain factors	NK	9	46	19258	102269	0.163636	0.158467	0.0552098	0.854311	1
MA0660.1	MEF2B	MADS box factors	Regulators of differentiation	8	47	20107	101420	0.145455	0.165453	-0.220014	0.856035	1
MA0688.1	TBX2	T-Box factors	TBX2-related factors	8	47	19667	101860	0.145455	0.161832	-0.181829	0.856036	1
MA0845.1	FOXB1	Fork headwinged helix factors	FOX	8	47	19654	101873	0.145455	0.161725	-0.18069	0.856048	1
MA1111.1	NR2F2	Nuclear receptors with C4 zinc fingers	RXR-related receptors (NR2)	10	45	20702	100825	0.181818	0.170349	0.114111	0.857215	1
MA0131.2	HINFP	C2H2 zinc finger factors	Factors with multiple dispersed zinc fingers	10	45	21420	100107	0.181818	0.176257	0.0545939	0.86031	1
MA0653.1	IRF9	Tryptophan cluster factors	Interferon-regulatory factors	9	46	22336	99191	0.163636	0.183795	-0.202796	0.8618	1
MA0645.1	ETV6	Tryptophan cluster factors	Ets-related	9	46	22372	99155	0.163636	0.184091	-0.205643	0.861831	1
MA0809.1	TEAD4	TEA domain factors	TEF-1-related factors	9	46	21791	99736	0.163636	0.17931	-0.159242	0.861863	1
MA0657.1	KLF13	C2H2 zinc finger factors	Three-zinc finger Kruppel-related	9	46	22517	99010	0.163636	0.185284	-0.217075	0.862004	1
MA0066.1	PPARG	Nuclear receptors with C4 zinc fingers	Thyroid hormone receptor-related factors (NR1)	9	46	22602	98925	0.163636	0.185983	-0.22375	0.862137	1
MA0148.3	FOXA1	Fork headwinged helix factors	FOX	11	44	23152	98375	0.2	0.190509	0.0871679	0.863577	1
MA0625.1	NFATC3	Rel homology region (RHR) factors	NFAT-related factors	11	44	23190	98337	0.2	0.190822	0.0842438	0.863711	1
MA0768.1	LEF1	High-mobility group (HMG) domain factors	TCF-7-related factors	11	44	23316	98211	0.2	0.191859	0.0745741	0.864189	1
MA1115.1	POU5F1	Homeo domain factors	POU domain factors	11	44	23571	97956	0.2	0.193957	0.0551264	0.865301	1
MA0859.1	Rarg	Nuclear receptors with C4 zinc fingers	Thyroid hormone receptor-related factors (NR1)	12	43	25050	96477	0.218182	0.206127	0.104087	0.8674	1
MA0857.1	Rarb	Nuclear receptors with C4 zinc fingers	Thyroid hormone receptor-related factors (NR1)	11	44	26497	95030	0.2	0.218034	-0.157444	0.87068	1
MA0111.1	Spz1	Basic helix-loop-helix factors (bHLH)		13	42	27231	94296	0.236364	0.224074	0.100081	0.871395	1
MA0116.1	Znf423	C2H2 zinc finger factors	Factors with multiple dispersed zinc fingers	12	43	28980	92547	0.218182	0.238466	-0.166171	0.874305	1
MA0041.1	Foxd3	Fork headwinged helix factors	FOX	15	40	31732	89795	0.272727	0.261111	0.0856655	0.878035	1
MA1123.1	TWIST1	Basic helix-loop-helix factors (bHLH)	Tal-related	14	41	33359	88168	0.254545	0.274499	-0.148015	0.879976	1
MA0483.1	Gfi1B	C2H2 zinc finger factors	More than 3 adjacent zinc fingers	16	39	33868	87659	0.290909	0.278687	0.0865826	0.880511	1
MA0812.1	TFAP2B	Basic helix-span-helix factors (bHSH)	AP-2	15	40	35575	85952	0.272727	0.292733	-0.142366	0.882273	1
MA0505.1	Nr5a2	Nuclear receptors with C4 zinc fingers	FTZF1related(NR5A)	15	40	34734	86793	0.272727	0.285813	-0.0938059	0.882632	1
MA0522.2	TCF3	Basic helix-loop-helix factors (bHLH)	E2A	18	37	41357	80170	0.327273	0.340311	-0.0845955	0.887797	1
MA0079.3	SP1	C2H2 zinc finger factors	Three-zinc finger Kruppel-related	34	21	76011	45516	0.618182	0.625466	-0.0447196	0.890259	1
MA0065.2	Pparg::Rxra	Nuclear receptors with C4 zinc fingers::Nuclear receptors with C4 zinc fingers	Thyroid hormone receptor-related factors (NR1)::RXR-related receptors (NR2)	23	32	53034	68493	0.418182	0.436397	-0.107424	0.892009	1
MA0050.2	IRF1	Tryptophan cluster factors	Interferon-regulatory factors	26	29	58658	62869	0.472727	0.482675	-0.0575334	0.893657	1
MA0517.1	STAT1::STAT2	STAT domain factors::STAT domain factors	STAT factors::STAT factors	20	35	45354	76173	0.363636	0.373201	-0.0593084	1	1
MA0612.1	EMX1	Homeo domain factors	NK	3	52	8527	113000	0.0545455	0.0701655	-0.387356	1	1
MA0628.1	POU6F1	Homeo domain factors	POU domain factors	2	53	5263	116264	0.0363636	0.0433072	-0.262546	1	1
MA0658.1	LHX6	Homeo domain factors	HD-LIM	3	52	6533	114994	0.0545455	0.0537576	0.0221951	1	1
MA0724.1	VENTX	Homeo domain factors	NK	3	52	6647	114880	0.0545455	0.0546957	-0.00419669	1	1
MA0727.1	NR3C2	Nuclear receptors with C4 zinc fingers	Steroid hormone receptors (NR3)	5	50	12061	109466	0.0909091	0.0992454	-0.139877	1	1
MA0804.1	TBX19	T-Box factors	Brachyury-related factors	3	52	7892	113635	0.0545455	0.0649403	-0.267613	1	1
MA0461.2	Atoh1	Basic helix-loop-helix factors (bHLH)	Tal-related	5	50	12829	108698	0.0909091	0.105565	-0.239117	1	1
MA0860.1	Rarg	Nuclear receptors with C4 zinc fingers	Thyroid hormone receptor-related factors (NR1)	11	44	24554	96973	0.2	0.202046	-0.0183767	1	1
MA0911.1	Hoxa11	Homeo domain factors	HOX	2	53	5727	115800	0.0363636	0.0471253	-0.390213	1	1
MA1105.1	GRHL2	Grainyhead domain factors	Grainyhead-related factors	7	48	16033	105494	0.127273	0.13193	-0.0595678	1	1
MA1108.1	MXI1	Basic helix-loop-helix factors (bHLH)	bHLH-ZIP	8	47	17692	103835	0.145455	0.145581	-0.00146508	1	1
MA0031.1	FOXD1	Fork headwinged helix factors	FOX	6	49	13065	108462	0.109091	0.107507	0.0236656	1	1
MA0059.1	MAX::MYC	Basic helix-loop-helix factors (bHLH)::Basic helix-loop-helix factors (bHLH)	bHLH-ZIP::bHLH-ZIP	7	48	16642	104885	0.127273	0.136941	-0.121722	1	1
MA0078.1	Sox17	High-mobility group (HMG) domain factors	SOX-related factors	7	48	16568	104959	0.127273	0.136332	-0.114272	1	1
MA0149.1	EWSR1-FLI1	Tryptophan cluster factors	Ets-related	34	21	75631	45896	0.618182	0.622339	-0.0254737	1	1
MA0002.2	Runx1	Runt domain factors	Runt-related factors	18	37	39603	81924	0.327273	0.325878	0.00914805	1	1
MA0146.2	Zfx	C2H2 zinc finger factors	More than 3 adjacent zinc fingers	26	29	58000	63527	0.472727	0.47726	-0.0262269	1	1
MA0507.1	POU2F2	Homeo domain factors	POU domain factors	10	45	23147	98380	0.181818	0.190468	-0.0824146	1	1
MA0465.1	CDX2	Homeo domain factors	HOX	8	47	18216	103311	0.145455	0.149893	-0.0508784	1	1
MA0523.1	TCF7L2	High-mobility group (HMG) domain factors	TCF-7-related factors	11	44	24903	96624	0.2	0.204917	-0.0439487	1	1
MA0144.2	STAT3	STAT domain factors	STAT factors	17	38	37413	84114	0.309091	0.307858	0.0083416	1	1
MA0608.1	Creb3l2	Basic leucine zipper factors (bZIP)	CREB-related factors	4	51	9663	111864	0.0727273	0.0795132	-0.139299	1	1
MA0609.1	Crem	Basic leucine zipper factors (bZIP)	CREB-related factors	1	54	3731	117796	0.0181818	0.030701	-0.774303	1	1
MA0610.1	DMRT3	DM-type intertwined zinc finger factors	DMRT factors	4	51	10764	110763	0.0727273	0.0885729	-0.309265	1	1
MA0615.1	Gmeb1	SAND domain factors	GMEB	2	53	4706	116821	0.0363636	0.0387239	-0.0942655	1	1
MA0622.1	Mlxip	Basic helix-loop-helix factors (bHLH)	bHLH-ZIP	5	50	12814	108713	0.0909091	0.105442	-0.237229	1	1
MA0631.1	Six3	Homeo domain factors	HD-SINE	3	52	8554	112973	0.0545455	0.0703877	-0.392262	1	1
MA0007.3	Ar	Nuclear receptors with C4 zinc fingers	Steroid hormone receptors (NR3)	6	49	14925	106602	0.109091	0.122812	-0.193353	1	1
MA0638.1	CREB3	Basic leucine zipper factors (bZIP)	CREB-related factors	4	51	8803	112724	0.0727273	0.0724366	0.00623048	1	1
MA0639.1	DBP	Basic leucine zipper factors (bZIP)	CEBP-related	2	53	5153	116374	0.0363636	0.0424021	-0.230708	1	1
MA0042.2	FOXI1	Fork headwinged helix factors	FOX	6	49	13083	108444	0.109091	0.107655	0.0214395	1	1
MA0033.2	FOXL1	Fork headwinged helix factors	FOX	6	49	13083	108444	0.109091	0.107655	0.0214395	1	1
MA0043.2	HLF	Basic leucine zipper factors (bZIP)	CEBP-related	2	53	6365	115162	0.0363636	0.0523752	-0.550571	1	1
MA0153.2	HNF1B	Homeo domain factors	POU domain factors	4	51	9186	112341	0.0727273	0.0755881	-0.0601219	1	1
MA0664.1	MLXIPL	Basic helix-loop-helix factors (bHLH)	bHLH-ZIP	3	52	8181	113346	0.0545455	0.0673184	-0.323177	1	1
MA0667.1	MYF6	Basic helix-loop-helix factors (bHLH)	MyoDASC-related factors	8	47	18045	103482	0.145455	0.148486	-0.0348824	1	1
MA0670.1	NFIA	SMADNF-1 DNA-binding domain factors	Nuclear factor 1	12	43	26325	95202	0.218182	0.216619	0.0132563	1	1
MA0673.1	NKX2-8	Homeo domain factors	NK	8	47	17363	104164	0.145455	0.142874	0.0301825	1	1
MA0684.1	RUNX3	Runt domain factors	Runt-related factors	6	49	15153	106374	0.109091	0.124688	-0.218326	1	1
MA0690.1	TBX21	T-Box factors	TBrain-related factors	9	46	19634	101893	0.163636	0.161561	0.0219932	1	1
MA0692.1	TFEB	Basic helix-loop-helix factors (bHLH)	bHLH-ZIP	6	49	14752	106775	0.109091	0.121389	-0.174186	1	1
MA0708.1	MSX2	Homeo domain factors	NK	5	50	10887	110640	0.0909091	0.089585	0.0232692	1	1
MA0709.1	Msx3	Homeo domain factors	NK	5	50	10887	110640	0.0909091	0.089585	0.0232692	1	1
MA0710.1	NOTO	Homeo domain factors	NK	4	51	9478	112049	0.0727273	0.0779909	-0.109025	1	1
MA0114.3	Hnf4a	Nuclear receptors with C4 zinc fingers	RXR-related receptors (NR2)	9	46	20958	100569	0.163636	0.172456	-0.0910504	1	1
MA0113.3	NR3C1	Nuclear receptors with C4 zinc fingers	Steroid hormone receptors (NR3)	5	50	11985	109542	0.0909091	0.0986201	-0.129754	1	1
MA0738.1	HIC2	C2H2 zinc finger factors	Factors with multiple dispersed zinc fingers	16	39	34977	86550	0.290909	0.287813	0.0217253	1	1
MA0746.1	SP3	C2H2 zinc finger factors	Three-zinc finger Kruppel-related	27	28	59929	61598	0.490909	0.493133	-0.0128389	1	1
MA0748.1	YY2	C2H2 zinc finger factors	More than 3 adjacent zinc fingers	4	51	9360	112167	0.0727273	0.0770199	-0.089431	1	1
MA0088.2	ZNF143	C2H2 zinc finger factors	More than 3 adjacent zinc fingers	12	43	27227	94300	0.218182	0.224041	-0.0491001	1	1
MA0755.1	CUX2	Homeo domain factors	HD-CUT	1	54	3524	118003	0.0181818	0.0289977	-0.68942	1	1
MA0761.1	ETV1	Tryptophan cluster factors	Ets-related	4	51	10066	111461	0.0727273	0.0828293	-0.20346	1	1
MA0762.1	ETV2	Tryptophan cluster factors	Ets-related	7	48	15445	106082	0.127273	0.127091	0.00236053	1	1
MA0764.1	ETV4	Tryptophan cluster factors	Ets-related	4	51	10162	111365	0.0727273	0.0836193	-0.218399	1	1
MA0765.1	ETV5	Tryptophan cluster factors	Ets-related	4	51	10479	111048	0.0727273	0.0862278	-0.266836	1	1
MA0769.1	Tcf7	High-mobility group (HMG) domain factors	TCF-7-related factors	10	45	23766	97761	0.181818	0.195561	-0.129545	1	1
MA0772.1	IRF7	Tryptophan cluster factors	Interferon-regulatory factors	12	43	26093	95434	0.218182	0.214709	0.0295396	1	1
MA0052.3	MEF2A	MADS box factors	Regulators of differentiation	11	44	25480	96047	0.2	0.209665	-0.0856673	1	1
MA0105.4	NFKB1	Rel homology region (RHR) factors	NF-kappaB-related factors	10	45	23198	98329	0.181818	0.190888	-0.0863408	1	1
MA0782.1	PKNOX1	Homeo domain factors	TALE-type homeo domain factors	9	46	21401	100126	0.163636	0.176101	-0.127527	1	1
MA0784.1	POU1F1	Homeo domain factors	POU domain factors	9	46	19647	101880	0.163636	0.161668	0.0208541	1	1
MA0785.1	POU2F1	Homeo domain factors	POU domain factors	8	47	17987	103540	0.145455	0.148008	-0.0294288	1	1
MA0794.1	PROX1	Homeo domain factors	HD-PROS factors	4	51	9047	112480	0.0727273	0.0744444	-0.0363402	1	1
MA0797.1	TGIF2	Homeo domain factors	TALE-type homeo domain factors	8	47	18934	102593	0.145455	0.155801	-0.116738	1	1
MA0808.1	TEAD3	TEA domain factors	TEF-1-related factors	8	47	18485	103042	0.145455	0.152106	-0.0757957	1	1
MA0810.1	TFAP2A	Basic helix-span-helix factors (bHSH)	AP-2	20	35	43944	77583	0.363636	0.361599	0.0127223	1	1
MA0524.2	TFAP2C	Basic helix-span-helix factors (bHSH)	AP-2	17	38	37936	83591	0.309091	0.312161	-0.0206933	1	1
MA0821.1	HES5	Basic helix-loop-helix factors (bHLH)	Hairy-related factors	7	48	15862	105665	0.127273	0.130522	-0.0417588	1	1
MA0058.3	MAX	Basic helix-loop-helix factors (bHLH)	bHLH-ZIP	5	50	12297	109230	0.0909091	0.101187	-0.170953	1	1
MA0834.1	ATF7	Basic leucine zipper factors (bZIP)	Jun-related	3	52	6758	114769	0.0545455	0.055609	-0.0294842	1	1
MA0844.1	XBP1	Basic leucine zipper factors (bZIP)	XBP-1-related factors	3	52	7459	114068	0.0545455	0.0613773	-0.180712	1	1
MA0032.2	FOXC1	Fork headwinged helix factors	FOX	10	45	22400	99127	0.181818	0.184321	-0.0241479	1	1
MA0847.1	FOXD2	Fork headwinged helix factors	FOX	6	49	13083	108444	0.109091	0.107655	0.0214395	1	1
MA0848.1	FOXO4	Fork headwinged helix factors	FOX	6	49	13083	108444	0.109091	0.107655	0.0214395	1	1
MA0849.1	FOXO6	Fork headwinged helix factors	FOX	6	49	13083	108444	0.109091	0.107655	0.0214395	1	1
MA0850.1	FOXP3	Fork headwinged helix factors	FOX	6	49	13083	108444	0.109091	0.107655	0.0214395	1	1
MA0861.1	TP73	p53 domain factors	p53-related factors	5	50	12772	108755	0.0909091	0.105096	-0.231934	1	1
MA0862.1	GMEB2	SAND domain factors	GMEB	0	55	1652	119875	0	0.0135937	-inf	1	1
MA0863.1	MTF1	C2H2 zinc finger factors	More than 3 adjacent zinc fingers	8	47	18131	103396	0.145455	0.149193	-0.0429426	1	1
MA0874.1	Arx	Homeo domain factors	Paired-related HD factors	3	52	7116	114411	0.0545455	0.0585549	-0.108462	1	1
MA0897.1	Hmx2	Homeo domain factors	NK	5	50	12327	109200	0.0909091	0.101434	-0.174866	1	1
MA0913.1	Hoxd9	Homeo domain factors	HOX	8	47	18166	103361	0.145455	0.149481	-0.046214	1	1
MA0495.2	MAFF	Basic leucine zipper factors (bZIP)	Maf-related	9	46	19588	101939	0.163636	0.161182	0.0260289	1	1
MA0496.2	MAFK	Basic leucine zipper factors (bZIP)	Maf-related	8	47	18798	102729	0.145455	0.154682	-0.104421	1	1
MA1114.1	PBX3	Homeo domain factors	TALE-type homeo domain factors	18	37	39557	81970	0.327273	0.3255	0.0116346	1	1
MA1154.1	ZNF282	C2H2 zinc finger factors	More than 3 adjacent zinc fingers	11	44	24171	97356	0.2	0.198894	0.00999287	1	1
MA1129.1	FOSL1::JUN	Basic leucine zipper factors (bZIP)::Basic leucine zipper factors (bZIP)	Fos-related::Jun-related	2	53	5729	115798	0.0363636	0.0471418	-0.390741	1	1
MA1136.1	FOSB::JUNB	Basic leucine zipper factors (bZIP)::Basic leucine zipper factors (bZIP)	Fos-related::Jun-related	2	53	6354	115173	0.0363636	0.0522847	-0.547938	1	1
MA1140.1	JUNB	Basic leucine zipper factors (bZIP)	Jun-related	2	53	4917	116610	0.0363636	0.0404601	-0.160151	1	1
MA1420.1	IRF5	Tryptophan cluster factors	Interferon-regulatory factors	5	50	12642	108885	0.0909091	0.104026	-0.215446	1	1
MA0718.1	RAX	Homeo domain factors	Paired-related HD factors	4	51	9181	112346	0.0727273	0.075547	-0.0592722	1	1

## Sheet: 1.YA_vs_0.NCI_Neural-Stem.up
Motif	Motif Name	Class	Family	Hits in list	Unhit in list	Hits in background	Unhit in background	Percent in list	Percent in background	Log2 Odds Ratio	PValue	QValue
MA0718.1	RAX	Homeo domain factors	Paired-related HD factors	12	9	9181	112346	0.571429	0.075547	4.02759	5.34414e-09	3.05685e-06
MA0894.1	HESX1	Homeo domain factors	Paired-related HD factors	10	11	8461	113066	0.47619	0.0696224	3.60263	4.63169e-07	0.000132466
MA0644.1	ESX1	Homeo domain factors	Paired-related HD factors	10	11	9132	112395	0.47619	0.0751438	3.48397	9.36431e-07	0.000150702
MA0642.1	EN2	Homeo domain factors	NK	10	11	9285	112242	0.47619	0.0764028	3.45804	1.09084e-06	0.000150702
MA0710.1	NOTO	Homeo domain factors	NK	10	11	9478	112049	0.47619	0.0779909	3.42588	1.31732e-06	0.000150702
MA0892.1	GSX1	Homeo domain factors	HOX	10	11	10545	110982	0.47619	0.0867708	3.25814	3.48207e-06	0.000331957
MA0912.1	Hoxd3	Homeo domain factors	HOX	10	11	11362	110165	0.47619	0.0934936	3.13982	6.82696e-06	0.00055786
MA0662.1	MIXL1	Homeo domain factors	Paired-related HD factors	9	12	9060	112467	0.428571	0.0745513	3.21883	9.15309e-06	0.000582776
MA0699.1	LBX2	Homeo domain factors	NK	9	12	9062	112465	0.428571	0.0745678	3.21849	9.16955e-06	0.000582776
MA0890.1	GBX2	Homeo domain factors	HOX	9	12	9321	112206	0.428571	0.076699	3.17447	1.15294e-05	0.000659482
MA0874.1	Arx	Homeo domain factors	Paired-related HD factors	8	13	7116	114411	0.380952	0.0585549	3.30657	1.41351e-05	0.000735026
MA0889.1	GBX1	Homeo domain factors	HOX	8	13	7701	113826	0.380952	0.0633686	3.18526	2.50799e-05	0.00119547
MA0854.1	Alx1	Homeo domain factors	Paired-related HD factors	8	13	7845	113682	0.380952	0.0645536	3.15672	2.86691e-05	0.00126144
MA0618.1	LBX1	Homeo domain factors	NK	9	12	10729	110798	0.428571	0.0882849	2.95326	3.57524e-05	0.00146074
MA0900.1	HOXA2	Homeo domain factors	HOX	8	13	8452	113075	0.380952	0.0695483	3.04141	4.89593e-05	0.00186433
MA0612.1	EMX1	Homeo domain factors	NK	8	13	8527	113000	0.380952	0.0701655	3.0277	5.21492e-05	0.00186433
MA0700.1	LHX2	Homeo domain factors	HD-LIM	8	13	9137	112390	0.380952	0.0751849	2.92016	8.52261e-05	0.00203437
MA0630.1	SHOX	Homeo domain factors	Paired-related HD factors	8	13	9139	112388	0.380952	0.0752014	2.91982	8.53582e-05	0.00203437
MA0654.1	ISX	Homeo domain factors	Paired-related HD factors	8	13	9139	112388	0.380952	0.0752014	2.91982	8.53582e-05	0.00203437
MA0701.1	LHX9	Homeo domain factors	HD-LIM	8	13	9139	112388	0.380952	0.0752014	2.91982	8.53582e-05	0.00203437
MA0716.1	PRRX1	Homeo domain factors	Paired-related HD factors	8	13	9139	112388	0.380952	0.0752014	2.91982	8.53582e-05	0.00203437
MA0717.1	RAX2	Homeo domain factors	Paired-related HD factors	8	13	9139	112388	0.380952	0.0752014	2.91982	8.53582e-05	0.00203437
MA0720.1	Shox2	Homeo domain factors	Paired-related HD factors	8	13	9139	112388	0.380952	0.0752014	2.91982	8.53582e-05	0.00203437
MA0721.1	UNCX	Homeo domain factors	Paired-related HD factors	8	13	9139	112388	0.380952	0.0752014	2.91982	8.53582e-05	0.00203437
MA0675.1	NKX6-2	Homeo domain factors	NK	9	12	12371	109156	0.428571	0.101796	2.72627	0.000109956	0.00251579
MA0893.1	GSX2	Homeo domain factors	HOX	9	12	12743	108784	0.428571	0.104857	2.67848	0.000138472	0.00304637
MA0780.1	PAX3	Paired box factors	Paired plus homeo domain	6	15	5100	116427	0.285714	0.041966	3.19085	0.000172195	0.00364798
MA0903.1	HOXB3	Homeo domain factors	HOX	8	13	10670	110857	0.380952	0.0877994	2.67652	0.000252284	0.0050961
MA0132.2	PDX1	Homeo domain factors	HOX	7	14	7958	113569	0.333333	0.0654834	2.83498	0.000264961	0.0050961
MA0680.1	PAX7	Paired box factors	Paired plus homeo domain	6	15	5531	115996	0.285714	0.0455125	3.06858	0.000267278	0.0050961
MA0882.1	DLX6	Homeo domain factors	NK	7	14	8086	113441	0.333333	0.0665367	2.81033	0.000292284	0.00539312
MA0027.2	EN1	Homeo domain factors	NK	7	14	8628	112899	0.333333	0.0709966	2.70982	0.00043459	0.0077683
MA0658.1	LHX6	Homeo domain factors	HD-LIM	6	15	6533	114994	0.285714	0.0537576	2.81548	0.000650383	0.0107308
MA0725.1	VSX1	Homeo domain factors	Paired-related HD factors	7	14	9237	112290	0.333333	0.0760078	2.60346	0.000656606	0.0107308
MA0726.1	VSX2	Homeo domain factors	Paired-related HD factors	7	14	9237	112290	0.333333	0.0760078	2.60346	0.000656606	0.0107308
MA0724.1	VENTX	Homeo domain factors	NK	6	15	6647	114880	0.285714	0.0546957	2.78918	0.000712554	0.0113217
MA0706.1	MEOX2	Homeo domain factors	HOX	7	14	10003	111524	0.333333	0.0823109	2.47874	0.00105685	0.0163384
MA0853.1	Alx4	Homeo domain factors	Paired-related HD factors	6	15	7268	114259	0.285714	0.0598056	2.65263	0.00113746	0.0171218
MA0707.1	MNX1	Homeo domain factors	HOX	8	13	13476	108051	0.380952	0.110889	2.3028	0.00122424	0.0175118
MA0887.1	EVX1	Homeo domain factors	HOX	6	15	7372	114155	0.285714	0.0606614	2.63082	0.0012246	0.0175118
MA0075.2	Prrx2	Homeo domain factors	Paired-related HD factors	6	15	7567	113960	0.285714	0.062266	2.59069	0.00140187	0.0195578
MA0877.1	Barhl1	Homeo domain factors	NK	7	14	10923	110604	0.333333	0.0898813	2.33993	0.00177296	0.0241461
MA0879.1	Dlx1	Homeo domain factors	NK	6	15	8082	113445	0.285714	0.0665037	2.48906	0.00196627	0.026156
MA0705.1	Lhx8	Homeo domain factors	HD-LIM	6	15	8507	113020	0.285714	0.0700009	2.40959	0.00255166	0.0331715
MA0661.1	MEOX1	Homeo domain factors	HOX	6	15	8563	112964	0.285714	0.0704617	2.39953	0.00263775	0.0335287
MA0902.1	HOXB2	Homeo domain factors	HOX	6	15	8657	112870	0.285714	0.0712352	2.38268	0.00278723	0.0346586
MA0704.1	Lhx4	Homeo domain factors	HD-LIM	5	16	6231	115296	0.238095	0.0512726	2.53162	0.0036171	0.0440208
MA0754.1	CUX1	Homeo domain factors	HD-CUT	4	17	3838	117689	0.190476	0.0315815	2.85079	0.00387642	0.046194
MA0478.1	FOSL2	Basic leucine zipper factors (bZIP)	Fos-related	0	21	30737	90790	0	0.252923	-inf	0.00406834	0.0474917
MA0886.1	EMX2	Homeo domain factors	NK	5	16	6496	115031	0.238095	0.0534531	2.46821	0.00432359	0.0494618
MA0125.1	Nobox	Homeo domain factors	Paired-related HD factors	6	15	9641	111886	0.285714	0.0793322	2.21476	0.00476862	0.0531964
MA0793.1	POU6F2	Homeo domain factors	POU domain factors	7	14	13021	108506	0.333333	0.107145	2.05898	0.00483604	0.0531964
MA0666.1	MSX1	Homeo domain factors	NK	6	15	10107	111420	0.285714	0.0831667	2.14068	0.00601074	0.0648706
MA0876.1	BSX	Homeo domain factors	NK	6	15	10192	111335	0.285714	0.0838661	2.1275	0.00626107	0.0663209
MA0888.1	EVX2	Homeo domain factors	HOX	5	16	7315	114212	0.238095	0.0601924	2.2865	0.00713827	0.074238
MA0472.2	EGR2	C2H2 zinc finger factors	Three-zinc finger Kruppel-related	0	21	26733	94794	0	0.219976	-inf	0.00763418	0.0779777
MA0621.1	mix-a	Homeo domain factors	Paired-related HD factors	6	15	10719	110808	0.285714	0.0882026	2.048	0.00799011	0.0801814
MA0708.1	MSX2	Homeo domain factors	NK	6	15	10887	110640	0.285714	0.089585	2.0234	0.0086089	0.0834625
MA0709.1	Msx3	Homeo domain factors	NK	6	15	10887	110640	0.285714	0.089585	2.0234	0.0086089	0.0834625
MA0068.2	PAX4	Paired box factors	Paired plus homeo domain	4	17	4951	116576	0.190476	0.0407399	2.46989	0.00946286	0.0902126
MA1124.1	ZNF24	C2H2 zinc finger factors	More than 3 adjacent zinc fingers	9	12	23118	98409	0.428571	0.190229	1.67484	0.0104017	0.0975376
MA1115.1	POU5F1	Homeo domain factors	POU domain factors	9	12	23571	97956	0.428571	0.193957	1.63998	0.0118166	0.109017
MA0881.1	Dlx4	Homeo domain factors	NK	5	16	8439	113088	0.238095	0.0694414	2.06621	0.0128478	0.116532
MA1121.1	TEAD2	TEA domain factors	TEF-1-related factors	0	21	26057	95470	0	0.214413	-inf	0.0131573	0.116532
MA0162.3	EGR1	C2H2 zinc finger factors	Three-zinc finger Kruppel-related	0	21	26276	95251	0	0.216215	-inf	0.0132991	0.116532
MA0807.1	TBX5	T-Box factors	TBX2-related factors	0	21	24110	97417	0	0.198392	-inf	0.013446	0.116532
MA0141.3	ESRRB	Nuclear receptors with C4 zinc fingers	Steroid hormone receptors (NR3)	8	13	19934	101593	0.380952	0.164029	1.64904	0.014194	0.121178
MA0722.1	VAX1	Homeo domain factors	NK	5	16	8837	112690	0.238095	0.0727164	1.99472	0.0154645	0.130084
MA0702.1	LMX1A	Homeo domain factors	HD-LIM	5	16	8964	112563	0.238095	0.0737614	1.97219	0.016371	0.132637
MA0703.1	LMX1B	Homeo domain factors	HD-LIM	5	16	8964	112563	0.238095	0.0737614	1.97219	0.016371	0.132637
MA0060.3	NFYA	Other alpha	NFY	7	14	16336	105191	0.333333	0.134423	1.68687	0.0164637	0.132637
MA0611.1	Dux	Homeo domain factors	Paired-related HD factors	6	15	12939	108588	0.285714	0.10647	1.74714	0.0192837	0.153198
MA0733.1	EGR4	C2H2 zinc finger factors	Three-zinc finger Kruppel-related	2	19	40056	81471	0.0952381	0.329606	-2.2238	0.0201051	0.157536
MA0880.1	Dlx3	Homeo domain factors	NK	4	17	6301	115226	0.190476	0.0518486	2.10526	0.0213058	0.164688
MA0904.1	Hoxb5	Homeo domain factors	HOX	5	16	9659	111868	0.238095	0.0794803	1.85568	0.0219793	0.167629
MA0477.1	FOSL1	Basic leucine zipper factors (bZIP)	Fos-related	0	21	21992	99535	0	0.180964	-inf	0.0225559	0.169142
MA0491.1	JUND	Basic leucine zipper factors (bZIP)	Jun-related	0	21	21674	99853	0	0.178347	-inf	0.0229064	0.169142
MA0790.1	POU4F1	Homeo domain factors	POU domain factors	7	14	17445	104082	0.333333	0.143548	1.57682	0.0230649	0.169142
MA0154.3	EBF1	Rel homology region (RHR) factors	Early B-Cell Factor-related factors	1	20	31101	90426	0.047619	0.255918	-2.78215	0.0243104	0.17602
MA0909.1	HOXD13	Homeo domain factors	HOX	7	14	17735	103792	0.333333	0.145935	1.54901	0.0250668	0.179228
MA0901.1	HOXB13	Homeo domain factors	HOX	7	14	17998	103529	0.333333	0.148099	1.52411	0.0269875	0.189565
MA0627.1	Pou2f3	Homeo domain factors	POU domain factors	7	14	18023	103504	0.333333	0.148304	1.52176	0.0271754	0.189565
MA0670.1	NFIA	SMADNF-1 DNA-binding domain factors	Nuclear factor 1	9	12	26325	95202	0.428571	0.216619	1.43945	0.0298415	0.205655
MA0875.1	BARX1	Homeo domain factors	NK	5	16	10535	110992	0.238095	0.0866886	1.7191	0.0307131	0.209142
MA0732.1	EGR3	C2H2 zinc finger factors	Three-zinc finger Kruppel-related	2	19	38698	82829	0.0952381	0.318431	-2.15017	0.0325783	0.219233
MA0787.1	POU3F2	Homeo domain factors	POU domain factors	7	14	18937	102590	0.333333	0.155825	1.43754	0.0347008	0.230801
MA0643.1	Esrrg	Nuclear receptors with C4 zinc fingers	Steroid hormone receptors (NR3)	7	14	19064	102463	0.333333	0.15687	1.42613	0.0358509	0.235709
MA0896.1	Hmx1	Homeo domain factors	NK	5	16	11032	110495	0.238095	0.0907782	1.64612	0.0365489	0.237568
MA1135.1	FOSB::JUNB	Basic leucine zipper factors (bZIP)::Basic leucine zipper factors (bZIP)	Fos-related::Jun-related	0	21	19412	102115	0	0.159734	-inf	0.0379882	0.244149
MA0723.1	VAX2	Homeo domain factors	NK	4	17	7826	113701	0.190476	0.0643972	1.77333	0.0426594	0.271124
MA1150.1	RORB	Nuclear receptors with C4 zinc fingers	Thyroid hormone receptor-related factors (NR1)	6	15	15718	105809	0.285714	0.129338	1.42903	0.0452804	0.28462
MA0674.1	NKX6-1	Homeo domain factors	NK	5	16	12053	109474	0.238095	0.0991796	1.50502	0.0506488	0.314903
MA0812.1	TFAP2B	Basic helix-span-helix factors (bHSH)	AP-2	2	19	35575	85952	0.0952381	0.292733	-1.97535	0.053671	0.330106
MA0897.1	Hmx2	Homeo domain factors	NK	5	16	12327	109200	0.238095	0.101434	1.46899	0.0549298	0.334254
MA0873.1	HOXD12	Homeo domain factors	HOX	3	18	5106	116421	0.142857	0.0420154	1.92619	0.0560996	0.335218
MA0864.1	E2F2	Fork headwinged helix factors	E2F	3	18	5112	116415	0.142857	0.0420647	1.92409	0.0562603	0.335218
MA0898.1	Hmx3	Homeo domain factors	NK	5	16	12474	109053	0.238095	0.102644	1.44995	0.0573146	0.337979
MA0142.1	Pou5f1::Sox2	Homeo domain factors::High-mobility group (HMG) domain factors	POU domain factors::SOX-related factors	8	13	25111	96416	0.380952	0.206629	1.2405	0.0588855	0.342955
MA0628.1	POU6F1	Homeo domain factors	POU domain factors	3	18	5263	116264	0.142857	0.0433072	1.88033	0.0603806	0.342955
MA0035.3	Gata1	Other C4 zinc finger-type factors	C4-GATA-related	0	21	17508	104019	0	0.144067	-inf	0.0615818	0.342955
MA1134.1	FOS::JUNB	Basic leucine zipper factors (bZIP)::Basic leucine zipper factors (bZIP)	Fos-related::Jun-related	0	21	18737	102790	0	0.15418	-inf	0.062598	0.342955
MA1138.1	FOSL2::JUNB	Basic leucine zipper factors (bZIP)::Basic leucine zipper factors (bZIP)	Fos-related::Jun-related	0	21	18823	102704	0	0.154887	-inf	0.0628276	0.342955
MA1144.1	FOSL2::JUND	Basic leucine zipper factors (bZIP)::Basic leucine zipper factors (bZIP)	Fos-related::Jun-related	0	21	18950	102577	0	0.155932	-inf	0.063204	0.342955
MA0805.1	TBX1	T-Box factors	TBX1-related factors	0	21	19084	102443	0	0.157035	-inf	0.0636493	0.342955
MA0806.1	TBX4	T-Box factors	TBX2-related factors	0	21	19084	102443	0	0.157035	-inf	0.0636493	0.342955
MA0526.2	USF2	Basic helix-loop-helix factors (bHLH)	bHLH-ZIP	0	21	19295	102232	0	0.158771	-inf	0.06445	0.342955
MA0494.1	Nr1h3::Rxra	Nuclear receptors with C4 zinc fingers::Nuclear receptors with C4 zinc fingers	Thyroid hormone receptor-related factors (NR1)::RXR-related receptors (NR2)	1	20	26139	95388	0.047619	0.215088	-2.45432	0.0646212	0.342955
MA0522.2	TCF3	Basic helix-loop-helix factors (bHLH)	E2A	3	18	41357	80170	0.142857	0.340311	-1.63002	0.0652797	0.342955
MA0788.1	POU3F3	Homeo domain factors	POU domain factors	7	14	19495	102032	0.333333	0.160417	1.38782	0.0653534	0.342955
MA0856.1	RXRG	Nuclear receptors with C4 zinc fingers	RXR-related receptors (NR2)	7	14	20063	101464	0.333333	0.165091	1.3383	0.0684264	0.355818
MA0485.1	Hoxc9	Homeo domain factors	HOX	5	16	13211	108316	0.238095	0.108708	1.35735	0.0702041	0.361772
MA0516.1	SP2	C2H2 zinc finger factors	Three-zinc finger Kruppel-related	9	12	76138	45389	0.428571	0.626511	-1.16132	0.07174	0.363713
MA0079.3	SP1	C2H2 zinc finger factors	Three-zinc finger Kruppel-related	9	12	76011	45516	0.428571	0.625466	-1.15488	0.0723751	0.363713
MA0594.1	Hoxa9	Homeo domain factors	HOX	5	16	13333	108194	0.238095	0.109712	1.34246	0.0724883	0.363713
MA0149.1	EWSR1-FLI1	Tryptophan cluster factors	Ets-related	9	12	75631	45896	0.428571	0.622339	-1.13566	0.0744319	0.370218
MA0760.1	ERF	Tryptophan cluster factors	Ets-related	5	16	13499	108028	0.238095	0.111078	1.32248	0.075665	0.372956
MA0682.1	Pitx1	Homeo domain factors	Paired-related HD factors	5	16	13531	107996	0.238095	0.111342	1.31865	0.0762865	0.372956
MA0910.1	Hoxd8	Homeo domain factors	HOX	5	16	13575	107952	0.238095	0.111704	1.31318	0.0771458	0.373961
MA0908.1	HOXD11	Homeo domain factors	HOX	3	18	5937	115590	0.142857	0.0488533	1.69814	0.0804759	0.386826
MA0146.2	Zfx	C2H2 zinc finger factors	More than 3 adjacent zinc fingers	6	15	58000	63527	0.285714	0.47726	-1.19054	0.0847758	0.404098
MA0885.1	Dlx2	Homeo domain factors	NK	4	17	10367	111160	0.190476	0.0853061	1.33509	0.0985177	0.430428
MA0019.1	Ddit3::Cebpa	Basic leucine zipper factors (bZIP)::Basic leucine zipper factors (bZIP)	CEBP-related::CEBP-related	0	21	15281	106246	0	0.125742	-inf	0.0996127	0.430428
MA0684.1	RUNX3	Runt domain factors	Runt-related factors	0	21	15153	106374	0	0.124688	-inf	0.0997184	0.430428
MA0692.1	TFEB	Basic helix-loop-helix factors (bHLH)	bHLH-ZIP	0	21	14752	106775	0	0.121389	-inf	0.100512	0.430428
MA0104.4	MYCN	Basic helix-loop-helix factors (bHLH)	bHLH-ZIP	0	21	16095	105432	0	0.13244	-inf	0.100567	0.430428
MA0482.1	Gata4	Other C4 zinc finger-type factors	C4-GATA-related	0	21	16120	105407	0	0.132645	-inf	0.10064	0.430428
MA0093.2	USF1	Basic helix-loop-helix factors (bHLH)	bHLH-ZIP	1	20	24298	97229	0.047619	0.199939	-2.32137	0.100675	0.430428
MA0694.1	ZBTB7B	C2H2 zinc finger factors	More than 3 adjacent zinc fingers	1	20	24747	96780	0.047619	0.203634	-2.35447	0.100721	0.430428
MA0501.1	MAF::NFE2	Basic leucine zipper factors (bZIP)::Basic leucine zipper factors (bZIP)	Maf-related::Jun-related	1	20	24804	96723	0.047619	0.204103	-2.35864	0.10077	0.430428
MA1099.1	Hes1	Basic helix-loop-helix factors (bHLH)	Hairy-related factors	0	21	16284	105243	0	0.133995	-inf	0.101181	0.430428
MA0740.1	KLF14	C2H2 zinc finger factors	Three-zinc finger Kruppel-related	3	18	39032	82495	0.142857	0.32118	-1.5053	0.101325	0.430428
MA0773.1	MEF2D	MADS box factors	Regulators of differentiation	1	20	23726	97801	0.047619	0.195232	-2.27854	0.101492	0.430428
MA0052.3	MEF2A	MADS box factors	Regulators of differentiation	1	20	25480	96047	0.047619	0.209665	-2.40755	0.102068	0.430428
MA0803.1	TBX15	T-Box factors	TBX1-related factors	1	20	23448	98079	0.047619	0.192945	-2.25744	0.102248	0.430428
MA0489.1	JUN	Basic leucine zipper factors (bZIP)	Jun-related	1	20	23444	98083	0.047619	0.192912	-2.25714	0.102261	0.430428
MA0811.1	TFAP2B	Basic helix-span-helix factors (bHSH)	AP-2	3	18	38489	83038	0.142857	0.316712	-1.47563	0.10234	0.430428
MA0683.1	POU4F2	Homeo domain factors	POU domain factors	6	15	17007	104520	0.285714	0.139944	1.29763	0.104891	0.43794
MA0777.1	MYBL2	Tryptophan cluster factors	MybSANT domain factors	2	19	3270	118257	0.0952381	0.0269076	1.92862	0.10865	0.447021
MA0528.1	ZNF263	C2H2 zinc finger factors	More than 3 adjacent zinc fingers	13	8	94651	26876	0.619048	0.778847	-1.11587	0.108921	0.447021
MA0514.1	Sox3	High-mobility group (HMG) domain factors	SOX-related factors	11	10	42598	78929	0.52381	0.350523	1.0273	0.110665	0.447817
MA0164.1	Nr2e3	Nuclear receptors with C4 zinc fingers	RXR-related receptors (NR2)	4	17	10824	110703	0.190476	0.0890666	1.26695	0.111171	0.447817
MA0685.1	SP4	C2H2 zinc finger factors	Three-zinc finger Kruppel-related	4	17	45188	76339	0.190476	0.371835	-1.33097	0.113005	0.452021
MA0810.1	TFAP2A	Basic helix-span-helix factors (bHSH)	AP-2	4	17	43944	77583	0.190476	0.361599	-1.26738	0.11608	0.45982
MA0714.1	PITX3	Homeo domain factors	Paired-related HD factors	4	17	11011	110516	0.190476	0.0906054	1.23969	0.116563	0.45982
MA0755.1	CUX2	Homeo domain factors	HD-CUT	2	19	3524	118003	0.0952381	0.0289977	1.8175	0.122966	0.481759
MA0634.1	ALX3	Homeo domain factors	Paired-related HD factors	4	17	11346	110181	0.190476	0.093362	1.19214	0.126522	0.492317
MA1101.1	BACH2	Basic leucine zipper factors (bZIP)	Jun-related	2	19	30459	91068	0.0952381	0.250636	-1.6679	0.130568	0.504626
MA0063.1	Nkx2-5	Homeo domain factors	NK	4	17	11514	110013	0.190476	0.0947444	1.16872	0.131658	0.505427
MA1120.1	SOX13	High-mobility group (HMG) domain factors	SOX-related factors	6	15	19501	102026	0.285714	0.160466	1.0654	0.132603	0.50566
MA0784.1	POU1F1	Homeo domain factors	POU domain factors	6	15	19647	101880	0.285714	0.161668	1.05258	0.134895	0.510992
MA0161.2	NFIC	SMADNF-1 DNA-binding domain factors	Nuclear factor 1	9	12	33122	88405	0.428571	0.272548	1.00135	0.138437	0.51592
MA0081.1	SPIB	Tryptophan cluster factors	Ets-related	9	12	33328	88199	0.428571	0.274244	0.989044	0.139859	0.51592
MA0481.2	FOXP1	Fork headwinged helix factors	FOX	6	15	20339	101188	0.285714	0.167362	0.992841	0.146684	0.51592
MA0046.2	HNF1A	Homeo domain factors	POU domain factors	4	17	12146	109381	0.190476	0.0999449	1.08334	0.151791	0.51592
MA0512.2	Rxra	Nuclear receptors with C4 zinc fingers	RXR-related receptors (NR2)	6	15	20662	100865	0.285714	0.17002	0.965517	0.152697	0.51592
MA0039.3	KLF4	C2H2 zinc finger factors	Three-zinc finger Kruppel-related	10	11	37811	83716	0.47619	0.311133	1.00923	0.154218	0.51592
MA1141.1	FOS::JUND	Basic leucine zipper factors (bZIP)::Basic leucine zipper factors (bZIP)	Fos-related::Jun-related	1	20	21975	99552	0.047619	0.180824	-2.14233	0.155289	0.51592
MA0809.1	TEAD4	TEA domain factors	TEF-1-related factors	1	20	21791	99736	0.047619	0.17931	-2.12754	0.155317	0.51592
MA0462.1	BATF::JUN	Basic leucine zipper factors (bZIP)::Basic leucine zipper factors (bZIP)	B-ATF-related factors::Jun-related	1	20	21751	99776	0.047619	0.178981	-2.12431	0.155341	0.51592
MA0855.1	RXRB	Nuclear receptors with C4 zinc fingers	RXR-related receptors (NR2)	6	15	20825	100702	0.285714	0.171361	0.951687	0.15585	0.51592
MA0488.1	JUN	Basic leucine zipper factors (bZIP)	Jun-related	6	15	20826	100701	0.285714	0.171369	0.951604	0.155869	0.51592
MA0657.1	KLF13	C2H2 zinc finger factors	Three-zinc finger Kruppel-related	1	20	22517	99010	0.047619	0.185284	-2.18536	0.155978	0.51592
MA0014.3	PAX5	Paired box factors	Paired domain only	1	20	21293	100234	0.047619	0.175212	-2.087	0.156074	0.51592
MA0778.1	NFKB2	Rel homology region (RHR) factors	NF-kappaB-related factors	1	20	22586	98941	0.047619	0.185852	-2.19078	0.156148	0.51592
MA0490.1	JUNB	Basic leucine zipper factors (bZIP)	Jun-related	1	20	22674	98853	0.047619	0.186576	-2.19768	0.156391	0.51592
MA0872.1	TFAP2A	Basic helix-span-helix factors (bHSH)	AP-2	3	18	35208	86319	0.142857	0.289713	-1.29114	0.156693	0.51592
MA0090.2	TEAD1	TEA domain factors	TEF-1-related factors	1	20	21080	100447	0.047619	0.173459	-2.06943	0.156705	0.51592
MA1113.1	PBX2	Homeo domain factors	TALE-type homeo domain factors	1	20	21063	100464	0.047619	0.17332	-2.06803	0.156764	0.51592
MA0476.1	FOS	Basic leucine zipper factors (bZIP)	Fos-related	1	20	23002	98525	0.047619	0.189275	-2.22319	0.157555	0.51592
MA0105.4	NFKB1	Rel homology region (RHR) factors	NF-kappaB-related factors	1	20	23198	98329	0.047619	0.190888	-2.23831	0.158443	0.51592
MA0823.1	HEY1	Basic helix-loop-helix factors (bHLH)	Hairy-related factors	0	21	12961	108566	0	0.106651	-inf	0.159225	0.51592
MA0074.1	RXRA::VDR	Nuclear receptors with C4 zinc fingers::Nuclear receptors with C4 zinc fingers	RXR-related receptors (NR2)::Thyroid hormone receptor-related factors (NR1)	0	21	12868	108659	0	0.105886	-inf	0.15928	0.51592
MA0527.1	ZBTB33	C2H2 zinc finger factors	Other factors with up to three adjacent zinc fingers	0	21	12866	108661	0	0.105869	-inf	0.159282	0.51592
MA0036.3	GATA2	Other C4 zinc finger-type factors	C4-GATA-related	0	21	12839	108688	0	0.105647	-inf	0.159308	0.51592
MA0616.1	Hes2	Basic helix-loop-helix factors (bHLH)	Hairy-related factors	0	21	13342	108185	0	0.109786	-inf	0.159556	0.51592
MA0632.1	Tcfl5	Basic helix-loop-helix factors (bHLH)	PAS domain factors	0	21	13384	108143	0	0.110132	-inf	0.159647	0.51592
MA0871.1	TFEC	Basic helix-loop-helix factors (bHLH)	bHLH-ZIP	0	21	14372	107155	0	0.118262	-inf	0.164721	0.529327
MA1104.1	GATA6	Other C4 zinc finger-type factors	C4-GATA-related	0	21	14563	106964	0	0.119833	-inf	0.166329	0.531509
MA0007.3	Ar	Nuclear receptors with C4 zinc fingers	Steroid hormone receptors (NR3)	5	16	14925	106602	0.238095	0.122812	1.15835	0.16996	0.540094
MA0830.1	TCF4	Basic helix-loop-helix factors (bHLH)	E2A	4	17	41782	79745	0.190476	0.343808	-1.15494	0.170949	0.540235
MA0502.1	NFYB	Heteromeric CCAAT-binding factors	Heteromeric CCAAT-binding	5	16	15354	106173	0.238095	0.126342	1.11165	0.175075	0.549143
MA0762.1	ETV2	Tryptophan cluster factors	Ets-related	5	16	15445	106082	0.238095	0.127091	1.10189	0.176277	0.549143
MA0508.2	PRDM1	C2H2 zinc finger factors	More than 3 adjacent zinc fingers	7	14	25297	96230	0.333333	0.20816	0.927452	0.176647	0.549143
MA0728.1	Nr2F6	Nuclear receptors with C4 zinc fingers	RXR-related receptors (NR2)	7	14	25594	95933	0.333333	0.210603	0.90617	0.180424	0.555893
MA0631.1	Six3	Homeo domain factors	HD-SINE	3	18	8554	112973	0.142857	0.0703877	1.13826	0.180763	0.555893
MA0772.1	IRF7	Tryptophan cluster factors	Interferon-regulatory factors	7	14	26093	95434	0.333333	0.214709	0.870816	0.187396	0.573213
MA0092.1	Hand1::Tcf3	Basic helix-loop-helix factors (bHLH)::Basic helix-loop-helix factors (bHLH)	Tal-related::E2A	7	14	26255	95272	0.333333	0.216043	0.859445	0.189825	0.577554
MA0638.1	CREB3	Basic leucine zipper factors (bZIP)	CREB-related factors	3	18	8803	112724	0.142857	0.0724366	1.09368	0.191748	0.579422
MA0741.1	KLF16	C2H2 zinc finger factors	Three-zinc finger Kruppel-related	7	14	59159	62368	0.333333	0.486797	-0.923778	0.192465	0.579422
MA0506.1	NRF1	Basic leucine zipper factors (bZIP)	Jun-related	2	19	27532	93995	0.0952381	0.22655	-1.47648	0.195758	0.584314
MA0737.1	GLIS3	C2H2 zinc finger factors	More than 3 adjacent zinc fingers	2	19	28859	92668	0.0952381	0.23747	-1.56491	0.196272	0.584314
MA0712.1	OTX2	Homeo domain factors	Paired-related HD factors	3	18	8924	112603	0.142857	0.0734322	1.07244	0.197155	0.584314
MA0158.1	HOXA5	Homeo domain factors	HOX	3	18	8983	112544	0.142857	0.0739177	1.06217	0.199807	0.589121
MA0480.1	Foxo1	Fork headwinged helix factors	FOX	8	13	30129	91398	0.380952	0.24792	0.900506	0.202538	0.59411
MA0071.1	RORA	Nuclear receptors with C4 zinc fingers	Thyroid hormone receptor-related factors (NR1)	5	16	17623	103904	0.238095	0.145013	0.881633	0.216051	0.630516
MA0883.1	Dmbx1	Homeo domain factors	Paired-related HD factors	3	18	9434	112093	0.142857	0.0776288	0.985729	0.220386	0.634877
MA0739.1	Hic1	C2H2 zinc finger factors	Factors with multiple dispersed zinc fingers	8	13	31953	89574	0.380952	0.262929	0.78668	0.220641	0.634877
MA0648.1	GSC	Homeo domain factors	Paired-related HD factors	3	18	9517	112010	0.142857	0.0783118	0.972031	0.224229	0.634877
MA0736.1	GLIS2	C2H2 zinc finger factors	More than 3 adjacent zinc fingers	3	18	34131	87396	0.142857	0.280851	-1.22847	0.224417	0.634877
MA0785.1	POU2F1	Homeo domain factors	POU domain factors	5	16	17987	103540	0.238095	0.148008	0.847079	0.224538	0.634877
MA0667.1	MYF6	Basic helix-loop-helix factors (bHLH)	MyoDASC-related factors	5	16	18045	103482	0.238095	0.148486	0.841626	0.225934	0.634877
MA0518.1	Stat4	STAT domain factors	STAT factors	3	18	32969	88558	0.142857	0.27129	-1.15948	0.22659	0.634877
MA0608.1	Creb3l2	Basic leucine zipper factors (bZIP)	CREB-related factors	3	18	9663	111864	0.142857	0.0795132	0.948203	0.231026	0.634877
MA0484.1	HNF4G	Nuclear receptors with C4 zinc fingers	RXR-related receptors (NR2)	9	12	36341	85186	0.428571	0.299036	0.813925	0.232392	0.634877
MA0690.1	TBX21	T-Box factors	TBrain-related factors	1	20	19634	101893	0.047619	0.161561	-1.94629	0.234626	0.634877
MA1142.1	FOSL1::JUND	Basic leucine zipper factors (bZIP)::Basic leucine zipper factors (bZIP)	Fos-related::Jun-related	1	20	19707	101820	0.047619	0.162161	-1.95268	0.234737	0.634877
MA0099.3	FOS::JUN	Basic leucine zipper factors (bZIP)::Basic leucine zipper factors (bZIP)	Fos-related::Jun-related	1	20	19739	101788	0.047619	0.162425	-1.95547	0.234794	0.634877
MA1137.1	FOSL1::JUNB	Basic leucine zipper factors (bZIP)::Basic leucine zipper factors (bZIP)	Fos-related::Jun-related	1	20	19841	101686	0.047619	0.163264	-1.96436	0.235008	0.634877
MA1130.1	FOSL2::JUN	Basic leucine zipper factors (bZIP)::Basic leucine zipper factors (bZIP)	Fos-related::Jun-related	1	20	20119	101408	0.047619	0.165552	-1.98838	0.235847	0.634877
MA0646.1	GCM1	GCM domain factors	GCM	1	20	18575	102952	0.047619	0.152847	-1.85138	0.236029	0.634877
MA0841.1	NFE2	Basic leucine zipper factors (bZIP)	Jun-related	1	20	18538	102989	0.047619	0.152542	-1.84799	0.236182	0.634877
MA0808.1	TEAD3	TEA domain factors	TEF-1-related factors	1	20	18485	103042	0.047619	0.152106	-1.84312	0.236414	0.634877
MA0814.1	TFAP2C	Basic helix-span-helix factors (bHSH)	AP-2	4	17	39688	81839	0.190476	0.326578	-1.04337	0.245848	0.637683
MA0742.1	Klf12	C2H2 zinc finger factors	Three-zinc finger Kruppel-related	4	17	38650	82877	0.190476	0.318036	-0.986952	0.248763	0.637683
MA0829.1	Srebf1	Basic helix-loop-helix factors (bHLH)	bHLH-ZIP	0	21	10670	110857	0	0.0877994	-inf	0.251915	0.637683
MA0831.2	TFE3	Basic helix-loop-helix factors (bHLH)	bHLH-ZIP	0	21	10673	110854	0	0.0878241	-inf	0.251916	0.637683
MA0603.1	Arntl	Basic helix-loop-helix factors (bHLH)	PAS domain factors	0	21	10448	111079	0	0.0859727	-inf	0.25203	0.637683
MA0828.1	SREBF2	Basic helix-loop-helix factors (bHLH)	bHLH-ZIP	0	21	10318	111209	0	0.0849029	-inf	0.252297	0.637683
MA0037.3	GATA3	Other C4 zinc finger-type factors	C4-GATA-related	0	21	10189	111338	0	0.0838415	-inf	0.252712	0.637683
MA0602.1	Arid5a	ARID	ARID-related	0	21	11067	110460	0	0.0910662	-inf	0.25275	0.637683
MA0645.1	ETV6	Tryptophan cluster factors	Ets-related	6	15	22372	99155	0.285714	0.184091	0.826053	0.255562	0.637683
MA0620.2	MITF	Basic helix-loop-helix factors (bHLH)	bHLH-ZIP	0	21	11601	109926	0	0.0954603	-inf	0.255868	0.637683
MA0766.1	GATA5	Other C4 zinc finger-type factors	C4-GATA-related	0	21	11636	109891	0	0.0957483	-inf	0.256148	0.637683
MA0626.1	Npas2	Basic helix-loop-helix factors (bHLH)	PAS domain factors	0	21	11856	109671	0	0.0975586	-inf	0.258118	0.637683
MA0259.1	ARNT::HIF1A	Basic helix-loop-helix factors (bHLH)::Basic helix-loop-helix factors (bHLH)	PAS domain factors::PAS domain factors	0	21	11931	109596	0	0.0981757	-inf	0.258869	0.637683
MA0779.1	PAX1	Paired box factors	Paired domain only	0	21	11941	109586	0	0.098258	-inf	0.258972	0.637683
MA0825.1	MNT	Basic helix-loop-helix factors (bHLH)	bHLH-ZIP	0	21	11992	109535	0	0.0986777	-inf	0.25951	0.637683
MA0836.1	CEBPD	Basic leucine zipper factors (bZIP)	CEBP-related	2	19	5727	115800	0.0952381	0.0471253	1.08984	0.260326	0.637683
MA0911.1	Hoxa11	Homeo domain factors	HOX	2	19	5727	115800	0.0952381	0.0471253	1.08984	0.260326	0.637683
MA0155.1	INSM1	C2H2 zinc finger factors	Factors with multiple dispersed zinc fingers	5	16	46534	74993	0.238095	0.382911	-0.989591	0.26081	0.637683
MA1125.1	ZNF384	C2H2 zinc finger factors	More than 3 adjacent zinc fingers	5	16	45478	76049	0.238095	0.374221	-0.936302	0.260825	0.637683
MA1116.1	RBPJ	Rel homology region (RHR) factors	CSL-related factors	11	10	46622	74905	0.52381	0.383635	0.821493	0.260965	0.637683
MA0517.1	STAT1::STAT2	STAT domain factors::STAT domain factors	STAT factors::STAT factors	5	16	45354	76173	0.238095	0.373201	-0.930013	0.26104	0.637683
MA0466.2	CEBPB	Basic leucine zipper factors (bZIP)	CEBP-related	2	19	5767	115760	0.0952381	0.0474545	1.07922	0.262929	0.637683
MA0058.3	MAX	Basic helix-loop-helix factors (bHLH)	bHLH-ZIP	0	21	12297	109230	0	0.101187	-inf	0.2631	0.637683
MA0838.1	CEBPG	Basic leucine zipper factors (bZIP)	CEBP-related	2	19	5808	115719	0.0952381	0.0477918	1.06849	0.265599	0.641025
MA0507.1	POU2F2	Homeo domain factors	POU domain factors	6	15	23147	98380	0.285714	0.190468	0.765601	0.267128	0.642005
MA0768.1	LEF1	High-mobility group (HMG) domain factors	TCF-7-related factors	6	15	23316	98211	0.285714	0.191859	0.752626	0.269942	0.646053
MA0747.1	SP8	C2H2 zinc finger factors	Three-zinc finger Kruppel-related	7	14	56221	65306	0.333333	0.462621	-0.783883	0.27789	0.656646
MA0769.1	Tcf7	High-mobility group (HMG) domain factors	TCF-7-related factors	6	15	23766	97761	0.285714	0.195561	0.718421	0.277916	0.656646
MA0471.1	E2F6	Fork headwinged helix factors	E2F	7	14	56010	65517	0.333333	0.460885	-0.773805	0.278877	0.656646
MA0837.1	CEBPE	Basic leucine zipper factors (bZIP)	CEBP-related	2	19	6013	115514	0.0952381	0.0494787	1.0159	0.27896	0.656646
MA1102.1	CTCFL	C2H2 zinc finger factors	More than 3 adjacent zinc fingers	8	13	61315	60212	0.380952	0.504538	-0.726613	0.282254	0.661676
MA0859.1	Rarg	Nuclear receptors with C4 zinc fingers	Thyroid hormone receptor-related factors (NR1)	2	19	25050	96477	0.0952381	0.206127	-1.30257	0.2848	0.664921
MA0860.1	Rarg	Nuclear receptors with C4 zinc fingers	Thyroid hormone receptor-related factors (NR1)	2	19	24554	96973	0.0952381	0.202046	-1.26632	0.286121	0.66529
MA0593.1	FOXP2	Fork headwinged helix factors	FOX	7	14	27115	94412	0.333333	0.223119	0.79987	0.29029	0.672249
MA0077.1	SOX9	High-mobility group (HMG) domain factors	SOX-related factors	4	17	14302	107225	0.190476	0.117686	0.818878	0.300875	0.693953
MA0799.1	RFX4	Fork headwinged helix factors	RFX-related factors	4	17	14406	107121	0.190476	0.118542	0.807025	0.303405	0.696979
MA0159.1	RARA::RXRA	Nuclear receptors with C4 zinc fingers::Nuclear receptors with C4 zinc fingers	Thyroid hormone receptor-related factors (NR1)::RXR-related receptors (NR2)	7	14	28740	92787	0.333333	0.236491	0.690855	0.306059	0.700263
MA0468.1	DUX4	Homeo domain factors	Paired-related HD factors	4	17	14622	106905	0.190476	0.120319	0.782642	0.308815	0.70175
MA0116.1	Znf423	C2H2 zinc finger factors	Factors with multiple dispersed zinc fingers	7	14	28980	92547	0.333333	0.238466	0.675122	0.309163	0.70175
MA0072.1	RORA	Nuclear receptors with C4 zinc fingers	Thyroid hormone receptor-related factors (NR1)	4	17	14702	106825	0.190476	0.120977	0.77369	0.31087	0.702836
MA0601.1	Arid3b	ARID	ARID-related	4	17	14910	106617	0.190476	0.122689	0.750609	0.316336	0.71238
MA1149.1	RARA::RXRG	Nuclear receptors with C4 zinc fingers::Nuclear receptors with C4 zinc fingers	Thyroid hormone receptor-related factors (NR1)::RXR-related receptors (NR2)	3	18	31946	89581	0.142857	0.262872	-1.09746	0.320246	0.718356
MA0906.1	HOXC12	Homeo domain factors	HOX	2	19	6669	114858	0.0952381	0.0548767	0.858285	0.32167	0.718731
MA0834.1	ATF7	Basic leucine zipper factors (bZIP)	Jun-related	2	19	6758	114769	0.0952381	0.055609	0.838054	0.327441	0.724271
MA1151.1	RORC	Nuclear receptors with C4 zinc fingers	Thyroid hormone receptor-related factors (NR1)	4	17	15340	106187	0.190476	0.126227	0.703759	0.328178	0.724271
MA0098.3	ETS1	Tryptophan cluster factors	Ets-related	4	17	15347	106180	0.190476	0.126285	0.703006	0.328376	0.724271
MA0442.2	SOX10	High-mobility group (HMG) domain factors	SOX-related factors	8	13	33772	87755	0.380952	0.277897	0.677207	0.329677	0.724271
MA0483.1	Gfi1B	C2H2 zinc finger factors	More than 3 adjacent zinc fingers	8	13	33868	87659	0.380952	0.278687	0.671533	0.33048	0.724271
MA0866.1	SOX21	High-mobility group (HMG) domain factors	SOX-related factors	4	17	15594	105933	0.190476	0.128317	0.676611	0.335491	0.732445
MA0505.1	Nr5a2	Nuclear receptors with C4 zinc fingers	FTZF1related(NR5A)	8	13	34734	86793	0.380952	0.285813	0.620785	0.339032	0.737362
MA0135.1	Lhx3	Homeo domain factors	HD-LIM	4	17	15898	105629	0.190476	0.130819	0.644613	0.344528	0.737461
MA0003.3	TFAP2A	Basic helix-span-helix factors (bHSH)	AP-2	4	17	37746	83781	0.190476	0.310598	-0.937157	0.345147	0.737461
MA0524.2	TFAP2C	Basic helix-span-helix factors (bHSH)	AP-2	4	17	37936	83591	0.190476	0.312161	-0.947676	0.345478	0.737461
MA0771.1	HSF4	Heat shock factors	HSF factors	1	20	16540	104987	0.047619	0.136101	-1.65574	0.346939	0.737461
MA0655.1	JDP2	Basic leucine zipper factors (bZIP)	Fos-related	1	20	17085	104442	0.047619	0.140586	-1.71002	0.346971	0.737461
MA0750.2	ZBTB7A	C2H2 zinc finger factors	More than 3 adjacent zinc fingers	4	17	36047	85480	0.190476	0.296617	-0.841749	0.347418	0.737461
MA1132.1	JUN::JUNB	Basic leucine zipper factors (bZIP)::Basic leucine zipper factors (bZIP)	Jun-related::Jun-related	1	20	17491	104036	0.047619	0.143927	-1.74952	0.348102	0.737461
MA0607.1	Bhlha15	Basic helix-loop-helix factors (bHLH)	Tal-related	5	16	18652	102875	0.238095	0.15348	0.785407	0.356249	0.749574
MA0650.1	HOXA13	Homeo domain factors	HOX	5	16	18758	102769	0.238095	0.154353	0.775744	0.357329	0.749574
MA0496.2	MAFK	Basic leucine zipper factors (bZIP)	Maf-related	5	16	18798	102729	0.238095	0.154682	0.772109	0.357751	0.749574
MA0852.2	FOXK1	Fork headwinged helix factors	FOX	5	16	19115	102412	0.238095	0.15729	0.743524	0.361359	0.751882
MA0138.2	REST	C2H2 zinc finger factors	Factors with multiple dispersed zinc fingers	10	11	44301	77226	0.47619	0.364536	0.66417	0.364398	0.751882
MA0786.1	POU3F1	Homeo domain factors	POU domain factors	5	16	19432	102095	0.238095	0.159899	0.715322	0.365425	0.751882
MA0605.1	Atf3	Basic leucine zipper factors (bZIP)	Fos-related	2	19	7373	114154	0.0952381	0.0606696	0.704639	0.367021	0.752459
MA0816.1	Ascl2	Basic helix-loop-helix factors (bHLH)	MyoDASC-related factors	10	11	45181	76346	0.47619	0.371777	0.619269	0.368451	0.752693
MA0844.1	XBP1	Basic leucine zipper factors (bZIP)	XBP-1-related factors	2	19	7459	114068	0.0952381	0.0613773	0.68682	0.372503	0.756195
MA0619.1	LIN54	CRC domain		5	16	19979	101548	0.238095	0.1644	0.667524	0.373463	0.756195
MA0640.1	ELF3	Tryptophan cluster factors	Ets-related	5	16	20021	101506	0.238095	0.164745	0.663897	0.374131	0.756195
MA0599.1	KLF5	C2H2 zinc finger factors	Three-zinc finger Kruppel-related	10	11	71516	50011	0.47619	0.588478	-0.653484	0.375622	0.756535
MA1100.1	ASCL1	Basic helix-loop-helix factors (bHLH)	MyoDASC-related factors	13	8	61772	59755	0.619048	0.508299	0.652534	0.384664	0.766504
MA0117.2	Mafb	Basic leucine zipper factors (bZIP)	Maf-related	5	16	20665	100862	0.238095	0.170045	0.609041	0.385239	0.766504
MA0065.2	Pparg::Rxra	Nuclear receptors with C4 zinc fingers::Nuclear receptors with C4 zinc fingers	Thyroid hormone receptor-related factors (NR1)::RXR-related receptors (NR2)	7	14	53034	68493	0.333333	0.436397	-0.630954	0.385932	0.766504
MA0114.3	Hnf4a	Nuclear receptors with C4 zinc fingers	RXR-related receptors (NR2)	5	16	20958	100569	0.238095	0.172456	0.584533	0.3908	0.773486
MA0525.2	TP63	p53 domain factors	p53-related factors	0	21	7956	113571	0	0.0654669	-inf	0.396402	0.774835
MA0067.1	Pax2	Paired box factors	Paired domain only	0	21	7924	113603	0	0.0652036	-inf	0.396505	0.774835
MA0112.3	ESR1	Nuclear receptors with C4 zinc fingers	Steroid hormone receptors (NR3)	5	16	21610	99917	0.238095	0.177821	0.530952	0.404212	0.774835
MA0734.1	GLI2	C2H2 zinc finger factors	More than 3 adjacent zinc fingers	2	19	22672	98855	0.0952381	0.186559	-1.1235	0.404295	0.774835
MA0464.2	BHLHE40	Basic helix-loop-helix factors (bHLH)	Hairy-related factors	0	21	9507	112020	0	0.0782295	-inf	0.404405	0.774835
MA0147.3	MYC	Basic helix-loop-helix factors (bHLH)	bHLH-ZIP	2	19	23063	98464	0.0952381	0.189777	-1.15388	0.404463	0.774835
MA0801.1	MGA	T-Box factors	TBX6-related factors	2	19	22035	99492	0.0952381	0.181318	-1.07312	0.405498	0.774835
MA0624.1	NFATC1	Rel homology region (RHR) factors	NFAT-related factors	2	19	23568	97959	0.0952381	0.193932	-1.19259	0.405668	0.774835
MA0819.1	CLOCK	Basic helix-loop-helix factors (bHLH)	PAS domain factors	0	21	9611	111916	0	0.0790853	-inf	0.405747	0.774835
MA1128.1	FOSL1::JUN	Basic leucine zipper factors (bZIP)::Basic leucine zipper factors (bZIP)	Fos-related::Jun-related	2	19	21783	99744	0.0952381	0.179244	-1.05288	0.406491	0.774835
MA0827.1	OLIG3	Basic helix-loop-helix factors (bHLH)	Tal-related	0	21	9754	111773	0	0.080262	-inf	0.407737	0.774835
MA0776.1	MYBL1	Tryptophan cluster factors	MybSANT domain factors	1	20	3037	118490	0.047619	0.0249903	0.96404	0.412333	0.780974
MA0891.1	GSC2	Homeo domain factors	Paired-related HD factors	3	18	10191	111336	0.142857	0.0838579	0.864579	0.414842	0.782782
MA0143.3	Sox2	High-mobility group (HMG) domain factors	SOX-related factors	6	15	25125	96402	0.285714	0.206744	0.618004	0.416024	0.782782
MA0907.1	HOXC13	Homeo domain factors	HOX	3	18	10415	111112	0.142857	0.0857011	0.830306	0.418992	0.785781
MA0156.2	FEV	Tryptophan cluster factors	Ets-related	3	18	11038	110489	0.142857	0.0908276	0.738375	0.43222	0.807941
MA0070.1	PBX1	Homeo domain factors	TALE-type homeo domain factors	3	18	11449	110078	0.142857	0.0942095	0.680252	0.442152	0.812483
MA0470.1	E2F4	Fork headwinged helix factors	E2F	3	18	28741	92786	0.142857	0.236499	-0.894105	0.442787	0.812483
MA0088.2	ZNF143	C2H2 zinc finger factors	More than 3 adjacent zinc fingers	6	15	27227	94300	0.285714	0.224041	0.470287	0.44386	0.812483
MA1122.1	TFDP1	Fork headwinged helix factors	E2F	3	18	29482	92045	0.142857	0.242596	-0.942384	0.443977	0.812483
MA0846.1	FOXC2	Fork headwinged helix factors	FOX	3	18	27780	93747	0.142857	0.228591	-0.83019	0.44423	0.812483
MA0629.1	Rhox11	Homeo domain factors	Paired-related HD factors	3	18	11541	109986	0.142857	0.0949666	0.667498	0.444492	0.812483
MA0150.2	Nfe2l2	Basic leucine zipper factors (bZIP)	Jun-related	3	18	27645	93882	0.142857	0.22748	-0.821088	0.44471	0.812483
MA0759.1	ELK3	Tryptophan cluster factors	Ets-related	3	18	11600	109927	0.142857	0.095452	0.659367	0.446014	0.812483
MA0509.1	Rfx1	Fork headwinged helix factors	RFX-related factors	7	14	30340	91187	0.333333	0.249656	0.587601	0.447777	0.813107
MA0080.4	SPI1	Tryptophan cluster factors	Ets-related	7	14	30763	90764	0.333333	0.253137	0.560918	0.450553	0.815558
MA0671.1	NFIX	SMADNF-1 DNA-binding domain factors	Nuclear factor 1	7	14	31188	90339	0.333333	0.256634	0.534353	0.453921	0.819062
MA0113.3	NR3C1	Nuclear receptors with C4 zinc fingers	Steroid hormone receptors (NR3)	3	18	11985	109542	0.142857	0.0986201	0.607203	0.456328	0.820145
MA0727.1	NR3C2	Nuclear receptors with C4 zinc fingers	Steroid hormone receptors (NR3)	3	18	12061	109466	0.142857	0.0992454	0.597083	0.458438	0.820145
MA1418.1	IRF3	Tryptophan cluster factors	Interferon-regulatory factors	7	14	31989	89538	0.333333	0.263225	0.48492	0.461776	0.822853
MA0870.1	Sox1	High-mobility group (HMG) domain factors	SOX-related factors	3	18	12341	109186	0.142857	0.101549	0.56028	0.466405	0.827198
MA0820.1	FIGLA	Basic helix-loop-helix factors (bHLH)	Tal-related	4	17	33902	87625	0.190476	0.278967	-0.717533	0.470237	0.827198
MA0119.1	NFIC::TLX1	SMADNF-1 DNA-binding domain factors::Homeo domain factors	Nuclear factor 1::NK	4	17	35167	86360	0.190476	0.289376	-0.791327	0.470254	0.827198
MA0698.1	ZBTB18	C2H2 zinc finger factors	More than 3 adjacent zinc fingers	4	17	33611	87916	0.190476	0.276572	-0.70032	0.470952	0.827198
MA0815.1	TFAP2C	Basic helix-span-helix factors (bHSH)	AP-2	4	17	33456	88071	0.190476	0.275297	-0.691114	0.471445	0.827198
MA0475.2	FLI1	Tryptophan cluster factors	Ets-related	3	18	12731	108796	0.142857	0.104759	0.510233	0.477964	0.832121
MA0461.2	Atoh1	Basic helix-loop-helix factors (bHLH)	Tal-related	3	18	12829	108698	0.142857	0.105565	0.497871	0.480945	0.832121
MA0474.2	ERG	Tryptophan cluster factors	Ets-related	3	18	12972	108555	0.142857	0.106742	0.47998	0.485344	0.832121
MA0031.1	FOXD1	Fork headwinged helix factors	FOX	3	18	13065	108462	0.142857	0.107507	0.468438	0.488236	0.832121
MA0042.2	FOXI1	Fork headwinged helix factors	FOX	3	18	13083	108444	0.142857	0.107655	0.466212	0.488798	0.832121
MA0033.2	FOXL1	Fork headwinged helix factors	FOX	3	18	13083	108444	0.142857	0.107655	0.466212	0.488798	0.832121
MA0847.1	FOXD2	Fork headwinged helix factors	FOX	3	18	13083	108444	0.142857	0.107655	0.466212	0.488798	0.832121
MA0848.1	FOXO4	Fork headwinged helix factors	FOX	3	18	13083	108444	0.142857	0.107655	0.466212	0.488798	0.832121
MA0849.1	FOXO6	Fork headwinged helix factors	FOX	3	18	13083	108444	0.142857	0.107655	0.466212	0.488798	0.832121
MA0850.1	FOXP3	Fork headwinged helix factors	FOX	3	18	13083	108444	0.142857	0.107655	0.466212	0.488798	0.832121
MA0122.2	NKX3-2	Homeo domain factors	NK	1	20	14548	106979	0.047619	0.11971	-1.44349	0.503164	0.847725
MA0124.2	Nkx3-1	Homeo domain factors	NK	1	20	14696	106831	0.047619	0.120928	-1.46009	0.50352	0.847725
MA0758.1	E2F7	Fork headwinged helix factors	E2F	3	18	13556	107971	0.142857	0.111547	0.40867	0.50386	0.847725
MA0757.1	ONECUT3	Homeo domain factors	HD-CUT	1	20	13630	107897	0.047619	0.112156	-1.33712	0.503892	0.847725
MA0029.1	Mecom	C2H2 zinc finger factors	Factors with multiple dispersed zinc fingers	1	20	15465	106062	0.047619	0.127256	-1.54409	0.507333	0.849625
MA0767.1	GCM2	GCM domain factors	GCM	1	20	15729	105798	0.047619	0.129428	-1.57211	0.509361	0.849625
MA0649.1	HEY2	Basic helix-loop-helix factors (bHLH)	Hairy-related factors	1	20	15743	105784	0.047619	0.129543	-1.57358	0.509478	0.849625
MA0030.1	FOXF2	Fork headwinged helix factors	FOX	1	20	15985	105542	0.047619	0.131535	-1.59889	0.511656	0.850777
MA0139.1	CTCF	C2H2 zinc finger factors	More than 3 adjacent zinc fingers	12	9	59611	61916	0.571429	0.490517	0.469761	0.516999	0.854811
MA1107.1	KLF9	C2H2 zinc finger factors	Three-zinc finger Kruppel-related	9	12	61899	59628	0.428571	0.509344	-0.468953	0.517071	0.854811
MA0791.1	POU4F3	Homeo domain factors	POU domain factors	4	17	16666	104861	0.190476	0.137138	0.566025	0.519281	0.85599
MA0673.1	NKX2-8	Homeo domain factors	NK	4	17	17363	104164	0.190476	0.142874	0.497298	0.529081	0.86714
MA0878.1	CDX1	Homeo domain factors	HOX	4	17	17416	104111	0.190476	0.14331	0.492166	0.529903	0.86714
MA0467.1	Crx	Homeo domain factors	Paired-related HD factors	4	17	17460	104067	0.190476	0.143672	0.487916	0.530593	0.86714
MA0492.1	JUND	Basic leucine zipper factors (bZIP)	Jun-related	4	17	17697	103830	0.190476	0.145622	0.465177	0.534429	0.870783
MA1112.1	NR4A1	Nuclear receptors with C4 zinc fingers	NGFI-B-related receptors (NR4)	4	17	17792	103735	0.190476	0.146404	0.456132	0.536021	0.870783
MA0102.3	CEBPA	Basic leucine zipper factors (bZIP)	CEBP-related	4	17	17928	103599	0.190476	0.147523	0.443254	0.538354	0.870783
MA0744.1	SCRT2	C2H2 zinc finger factors	More than 3 adjacent zinc fingers	4	17	17960	103567	0.190476	0.147786	0.440236	0.538911	0.870783
MA0913.1	Hoxd9	Homeo domain factors	HOX	4	17	18166	103361	0.190476	0.149481	0.42091	0.54258	0.874241
MA0641.1	ELF4	Tryptophan cluster factors	Ets-related	4	17	18707	102820	0.190476	0.153933	0.371003	0.552823	0.885653
MA0797.1	TGIF2	Homeo domain factors	TALE-type homeo domain factors	4	17	18934	102593	0.190476	0.155801	0.350414	0.557364	0.885653
MA0660.1	MEF2B	MADS box factors	Regulators of differentiation	2	19	20107	101420	0.0952381	0.165453	-0.913341	0.560479	0.885653
MA0731.1	BCL6B	C2H2 zinc finger factors	More than 3 adjacent zinc fingers	2	19	19797	101730	0.0952381	0.162902	-0.886523	0.560657	0.885653
MA0688.1	TBX2	T-Box factors	TBX2-related factors	2	19	19667	101860	0.0952381	0.161832	-0.875176	0.560851	0.885653
MA0867.1	SOX4	High-mobility group (HMG) domain factors	SOX-related factors	2	19	19566	101961	0.0952381	0.161001	-0.866319	0.561052	0.885653
MA0869.1	Sox11	High-mobility group (HMG) domain factors	SOX-related factors	2	19	19345	102182	0.0952381	0.159183	-0.846808	0.561645	0.885653
MA0693.2	VDR	Nuclear receptors with C4 zinc fingers	Thyroid hormone receptor-related factors (NR1)	2	19	19227	102300	0.0952381	0.158212	-0.836316	0.562049	0.885653
MA0131.2	HINFP	C2H2 zinc finger factors	Factors with multiple dispersed zinc fingers	2	19	21420	100107	0.0952381	0.176257	-1.0234	0.564012	0.886305
MA0066.1	PPARG	Nuclear receptors with C4 zinc fingers	Thyroid hormone receptor-related factors (NR1)	5	16	22602	98925	0.238095	0.185983	0.451807	0.572643	0.896844
MA0851.1	Foxj3	Fork headwinged helix factors	FOX	5	16	22730	98797	0.238095	0.187037	0.441792	0.573855	0.896844
MA0677.1	Nr2f6	Nuclear receptors with C4 zinc fingers	RXR-related receptors (NR2)	5	16	23703	97824	0.238095	0.195043	0.367043	0.584676	0.911266
MA0101.1	REL	Rel homology region (RHR) factors	NF-kappaB-related factors	5	16	24266	97261	0.238095	0.199676	0.32485	0.59213	0.920275
MA0857.1	Rarb	Nuclear receptors with C4 zinc fingers	Thyroid hormone receptor-related factors (NR1)	3	18	26497	95030	0.142857	0.218034	-0.742377	0.597297	0.920275
MA0639.1	DBP	Basic leucine zipper factors (bZIP)	CEBP-related	1	20	5153	116374	0.047619	0.0424021	0.175282	0.597464	0.920275
MA0596.1	SREBF2	Basic helix-loop-helix factors (bHLH)	bHLH-ZIP	3	18	25194	96333	0.142857	0.207312	-0.649992	0.597643	0.920275
MA0695.1	ZBTB7C	C2H2 zinc finger factors	More than 3 adjacent zinc fingers	3	18	26976	94551	0.142857	0.221975	-0.77551	0.5985	0.920275
MA0832.1	Tcf21	Basic helix-loop-helix factors (bHLH)	Tal-related	6	15	27425	94102	0.285714	0.22567	0.456801	0.60026	0.920506
MA1152.1	SOX15	High-mobility group (HMG) domain factors	SOX-related factors	6	15	28952	92575	0.285714	0.238235	0.355028	0.61039	0.927155
MA0843.1	TEF	Basic leucine zipper factors (bZIP)	CEBP-related	1	20	5355	116172	0.047619	0.0440643	0.117277	0.611884	0.927155
MA0635.1	BARHL2	Homeo domain factors	NK	1	20	5392	116135	0.047619	0.0443687	0.106875	0.614471	0.927155
MA0152.1	NFATC2	Rel homology region (RHR) factors	NFAT-related factors	6	15	29451	92076	0.285714	0.242341	0.322581	0.614989	0.927155
MA0651.1	HOXC11	Homeo domain factors	HOX	1	20	5451	116076	0.047619	0.0448542	0.0905222	0.618563	0.927155
MA1155.1	ZSCAN4	C2H2 zinc finger factors	More than 3 adjacent zinc fingers	6	15	29883	91644	0.285714	0.245896	0.294809	0.619438	0.927155
MA0665.1	MSC	Basic helix-loop-helix factors (bHLH)	Tal-related	4	17	32191	89336	0.190476	0.264888	-0.61482	0.621555	0.927155
MA0591.1	Bach1::Mafk	Basic leucine zipper factors (bZIP)::Basic leucine zipper factors (bZIP)	Jun-related::Maf-related	4	17	30566	90961	0.190476	0.251516	-0.51411	0.623139	0.927155
MA0687.1	SPIC	Tryptophan cluster factors	Ets-related	6	15	30231	91296	0.285714	0.24876	0.272631	0.623318	0.927155
MA0024.3	E2F1	Fork headwinged helix factors	E2F	0	21	5553	115974	0	0.0456935	-inf	0.623411	0.927155
MA0604.1	Atf1	Basic leucine zipper factors (bZIP)	CREB-related factors	0	21	6247	115280	0	0.0514042	-inf	0.624264	0.927155
MA0463.1	Bcl6	C2H2 zinc finger factors	More than 3 adjacent zinc fingers	7	14	33596	87931	0.333333	0.276449	0.388091	0.625667	0.927155
MA0818.1	BHLHE22	Basic helix-loop-helix factors (bHLH)	Tal-related	0	21	6883	114644	0	0.0566376	-inf	0.62937	0.929686
MA0679.1	ONECUT1	Homeo domain factors	HD-CUT	0	21	7081	114446	0	0.0582669	-inf	0.631663	0.929686
MA0895.1	HMBOX1	Homeo domain factors	POU domain factors	0	21	7128	114399	0	0.0586536	-inf	0.632252	0.929686
MA0817.1	BHLHE23	Basic helix-loop-helix factors (bHLH)	Tal-related	0	21	7534	113993	0	0.0619945	-inf	0.637981	0.929959
MA0745.1	SNAI2	C2H2 zinc finger factors	More than 3 adjacent zinc fingers	5	16	36675	84852	0.238095	0.301785	-0.467976	0.639199	0.929959
MA0048.2	NHLH1	Basic helix-loop-helix factors (bHLH)	Tal-related	8	13	38692	82835	0.380952	0.318382	0.397814	0.63977	0.929959
MA0636.1	BHLHE41	Basic helix-loop-helix factors (bHLH)	Hairy-related factors	0	21	7687	113840	0	0.0632534	-inf	0.640418	0.929959
MA0826.1	OLIG1	Basic helix-loop-helix factors (bHLH)	Tal-related	0	21	7696	113831	0	0.0633275	-inf	0.640566	0.929959
MA0804.1	TBX19	T-Box factors	Brachyury-related factors	2	19	7892	113635	0.0952381	0.0649403	0.599922	0.643934	0.932481
MA0905.1	HOXC10	Homeo domain factors	HOX	2	19	8169	113358	0.0952381	0.0672196	0.546635	0.648996	0.936661
MA0697.1	ZIC3	C2H2 zinc finger factors	More than 3 adjacent zinc fingers	6	15	43550	77977	0.285714	0.358357	-0.481548	0.650095	0.936661
MA0751.1	ZIC4	C2H2 zinc finger factors	More than 3 adjacent zinc fingers	6	15	41770	79757	0.285714	0.34371	-0.388815	0.652679	0.938021
MA1109.1	NEUROD1	Basic helix-loop-helix factors (bHLH)	Tal-related	9	12	46310	75217	0.428571	0.381068	0.284681	0.658744	0.942559
MA1127.1	FOSB::JUN	Basic leucine zipper factors (bZIP)::Basic leucine zipper factors (bZIP)	Fos-related::Jun-related	2	19	8896	112631	0.0952381	0.0732018	0.41437	0.663915	0.942559
MA0746.1	SP3	C2H2 zinc finger factors	Three-zinc finger Kruppel-related	9	12	59929	61598	0.428571	0.493133	-0.375402	0.664232	0.942559
MA0499.1	Myod1	Basic helix-loop-helix factors (bHLH)	MyoDASC-related factors	10	11	51825	69702	0.47619	0.426448	0.290038	0.664457	0.942559
MA0009.2	TBXT	T-Box factors	Brachyury-related factors	2	19	8932	112595	0.0952381	0.0734981	0.408083	0.664706	0.942559
MA0163.1	PLAG1	C2H2 zinc finger factors	More than 3 adjacent zinc fingers	9	12	59092	62435	0.428571	0.486246	-0.33564	0.666137	0.942559
MA0756.1	ONECUT2	Homeo domain factors	HD-CUT	2	19	9052	112475	0.0952381	0.0744855	0.387291	0.667371	0.942559
MA1145.1	FOSL2::JUND	Basic leucine zipper factors (bZIP)::Basic leucine zipper factors (bZIP)	Fos-related::Jun-related	2	19	9725	111802	0.0952381	0.0800234	0.275173	0.683062	0.962344
MA1131.1	FOSL2::JUN	Basic leucine zipper factors (bZIP)::Basic leucine zipper factors (bZIP)	Fos-related::Jun-related	2	19	10415	111112	0.0952381	0.0857011	0.167337	0.700104	0.971948
MA1126.1	FOS::JUN	Basic leucine zipper factors (bZIP)::Basic leucine zipper factors (bZIP)	Fos-related::Jun-related	2	19	10520	111007	0.0952381	0.0865651	0.151492	0.702755	0.971948
MA0610.1	DMRT3	DM-type intertwined zinc finger factors	DMRT factors	2	19	10764	110763	0.0952381	0.0885729	0.115215	0.708956	0.971948
MA0686.1	SPDEF	Tryptophan cluster factors	Ets-related	2	19	10788	110739	0.0952381	0.0887704	0.111782	0.709568	0.971948
MA0028.2	ELK1	Tryptophan cluster factors	Ets-related	1	20	11572	109955	0.047619	0.0952216	-1.07372	0.715534	0.971948
MA0715.1	PROP1	Homeo domain factors	Paired-related HD factors	1	20	11864	109663	0.047619	0.0976244	-1.11351	0.715728	0.971948
MA0511.2	RUNX2	Runt domain factors	Runt-related factors	1	20	12072	109455	0.047619	0.099336	-1.14132	0.7161	0.971948
MA0763.1	ETV3	Tryptophan cluster factors	Ets-related	1	20	11055	110472	0.047619	0.0909674	-1.00099	0.716185	0.971948
MA0752.1	ZNF410	C2H2 zinc finger factors	More than 3 adjacent zinc fingers	1	20	12482	109045	0.047619	0.10271	-1.19492	0.717375	0.971948
MA0781.1	PAX9	Paired box factors	Paired domain only	1	20	12558	108969	0.047619	0.103335	-1.20468	0.717687	0.971948
MA0106.3	TP53	p53 domain factors	p53-related factors	1	20	12721	108806	0.047619	0.104676	-1.22545	0.718434	0.971948
MA0861.1	TP73	p53 domain factors	p53-related factors	1	20	12772	108755	0.047619	0.105096	-1.2319	0.718689	0.971948
MA0622.1	Mlxip	Basic helix-loop-helix factors (bHLH)	bHLH-ZIP	1	20	12814	108713	0.047619	0.105442	-1.23719	0.718906	0.971948
MA0659.1	MAFG	Basic leucine zipper factors (bZIP)	Maf-related	1	20	13482	108045	0.047619	0.110938	-1.3194	0.72322	0.971948
MA0839.1	CREB3L1	Basic leucine zipper factors (bZIP)	CREB-related factors	3	18	13636	107891	0.142857	0.112206	0.399112	0.724446	0.971948
MA0510.2	RFX5	Fork headwinged helix factors	RFX-related factors	3	18	14267	107260	0.142857	0.117398	0.325392	0.730168	0.971948
MA1146.1	NR1H4::RXRA	Nuclear receptors with C4 zinc fingers::Nuclear receptors with C4 zinc fingers	Thyroid hormone receptor-related factors (NR1)::RXR-related receptors (NR2)	3	18	14614	106913	0.142857	0.120253	0.286048	0.733789	0.971948
MA0614.1	Foxj2	Fork headwinged helix factors	FOX	3	18	14633	106894	0.142857	0.120409	0.283917	0.733996	0.971948
MA0633.1	Twist2	Basic helix-loop-helix factors (bHLH)	Tal-related	3	18	14767	106760	0.142857	0.121512	0.268957	0.735482	0.971948
MA0157.2	FOXO3	Fork headwinged helix factors	FOX	3	18	14943	106584	0.142857	0.12296	0.24948	0.737499	0.971948
MA0669.1	NEUROG2	Basic helix-loop-helix factors (bHLH)	Tal-related	3	18	15128	106399	0.142857	0.124483	0.229215	0.739694	0.971948
MA0486.2	HSF1	Heat shock factors	HSF factors	3	18	15650	105877	0.142857	0.128778	0.173156	0.746274	0.971948
MA0821.1	HES5	Basic helix-loop-helix factors (bHLH)	Hairy-related factors	3	18	15862	105665	0.142857	0.130522	0.150842	0.749093	0.971948
MA1105.1	GRHL2	Grainyhead domain factors	Grainyhead-related factors	3	18	16033	105494	0.142857	0.13193	0.133125	0.751422	0.971948
MA0899.1	HOXA10	Homeo domain factors	HOX	2	19	17560	103967	0.0952381	0.144495	-0.682159	0.758201	0.971948
MA0040.1	Foxq1	Fork headwinged helix factors	FOX	2	19	17610	103917	0.0952381	0.144906	-0.686955	0.758232	0.971948
MA0735.1	GLIS1	C2H2 zinc finger factors	More than 3 adjacent zinc fingers	2	19	17749	103778	0.0952381	0.14605	-0.700229	0.758354	0.971948
MA1153.1	Smad4	SMADNF-1 DNA-binding domain factors	SMAD factors	3	18	16545	104982	0.142857	0.136143	0.0807306	0.758665	0.971948
MA0676.1	Nr2e1	Nuclear receptors with C4 zinc fingers	RXR-related receptors (NR2)	2	19	18088	103439	0.0952381	0.148839	-0.732244	0.758869	0.971948
MA0743.1	SCRT1	C2H2 zinc finger factors	More than 3 adjacent zinc fingers	2	19	18089	103438	0.0952381	0.148848	-0.732337	0.758871	0.971948
MA0059.1	MAX::MYC	Basic helix-loop-helix factors (bHLH)::Basic helix-loop-helix factors (bHLH)	bHLH-ZIP::bHLH-ZIP	2	19	16642	104885	0.0952381	0.136941	-0.592014	0.75889	0.971948
MA0863.1	MTF1	C2H2 zinc finger factors	More than 3 adjacent zinc fingers	2	19	18131	103396	0.0952381	0.149193	-0.736269	0.758956	0.971948
MA0078.1	Sox17	High-mobility group (HMG) domain factors	SOX-related factors	3	18	16568	104959	0.142857	0.136332	0.0784094	0.758999	0.971948
MA0115.1	NR1H2::RXRA	Nuclear receptors with C4 zinc fingers::Nuclear receptors with C4 zinc fingers	Thyroid hormone receptor-related factors (NR1)::RXR-related receptors (NR2)	2	19	18228	103299	0.0952381	0.149991	-0.745321	0.75917	0.971948
MA0800.1	EOMES	T-Box factors	TBrain-related factors	2	19	19040	102487	0.0952381	0.156673	-0.819581	0.761874	0.971948
MA0672.1	NKX2-3	Homeo domain factors	NK	4	17	19258	102269	0.190476	0.158467	0.321354	0.762876	0.971948
MA0100.3	MYB	Tryptophan cluster factors	MybSANT domain factors	4	17	19354	102173	0.190476	0.159257	0.312824	0.763347	0.971948
MA0592.2	Esrra	Nuclear receptors with C4 zinc fingers	Steroid hormone receptors (NR3)	4	17	19504	102023	0.190476	0.160491	0.299565	0.764123	0.971948
MA0689.1	TBX20	T-Box factors	TBX1-related factors	4	17	19579	101948	0.190476	0.161108	0.292966	0.764529	0.971948
MA0495.2	MAFF	Basic leucine zipper factors (bZIP)	Maf-related	4	17	19588	101939	0.190476	0.161182	0.292175	0.764579	0.971948
MA0796.1	TGIF1	Homeo domain factors	TALE-type homeo domain factors	4	17	19897	101630	0.190476	0.163725	0.26521	0.766382	0.971948
MA1111.1	NR2F2	Nuclear receptors with C4 zinc fingers	RXR-related receptors (NR2)	4	17	20702	100825	0.190476	0.170349	0.1965	0.77196	0.971948
MA1119.1	SIX2	Homeo domain factors	HD-SINE	4	17	21253	100274	0.190476	0.174883	0.150782	0.776439	0.971948
MA0782.1	PKNOX1	Homeo domain factors	TALE-type homeo domain factors	4	17	21401	100126	0.190476	0.176101	0.138635	0.777725	0.971948
MA0729.1	RARA	Nuclear receptors with C4 zinc fingers	Thyroid hormone receptor-related factors (NR1)	4	17	21681	99846	0.190476	0.178405	0.115834	0.780248	0.971948
MA0148.3	FOXA1	Fork headwinged helix factors	FOX	3	18	23152	98375	0.142857	0.190509	-0.497798	0.783046	0.971948
MA0625.1	NFATC3	Rel homology region (RHR) factors	NFAT-related factors	3	18	23190	98337	0.142857	0.190822	-0.500721	0.783047	0.971948
MA0038.1	Gfi1	C2H2 zinc finger factors	More than 3 adjacent zinc fingers	3	18	23361	98166	0.142857	0.192229	-0.513831	0.783091	0.971948
MA0842.1	NRL	Basic leucine zipper factors (bZIP)	Maf-related	3	18	22656	98871	0.142857	0.186428	-0.4593	0.783291	0.971948
MA0091.1	TAL1::TCF3	Basic helix-loop-helix factors (bHLH)::Basic helix-loop-helix factors (bHLH)	Tal-related::E2A	3	18	23893	97634	0.142857	0.196607	-0.554154	0.78359	0.971948
MA0047.2	Foxa2	Fork headwinged helix factors	FOX	3	18	22416	99111	0.142857	0.184453	-0.440439	0.783591	0.971948
MA0032.2	FOXC1	Fork headwinged helix factors	FOX	3	18	22400	99127	0.142857	0.184321	-0.439176	0.783615	0.971948
MA0653.1	IRF9	Tryptophan cluster factors	Interferon-regulatory factors	3	18	22336	99191	0.142857	0.183795	-0.434117	0.783717	0.971948
MA1421.1	TCF7L1	High-mobility group (HMG) domain factors	TCF-7-related factors	3	18	23992	97535	0.142857	0.197421	-0.561583	0.783743	0.971948
MA0520.1	Stat6	STAT domain factors	STAT factors	3	18	24584	96943	0.142857	0.202292	-0.605529	0.785035	0.971948
MA1117.1	RELB	Rel homology region (RHR) factors	NF-kappaB-related factors	5	16	25577	95950	0.238095	0.210464	0.229408	0.788589	0.972403
MA0783.1	PKNOX2	Homeo domain factors	TALE-type homeo domain factors	5	16	25625	95902	0.238095	0.210858	0.22598	0.788802	0.972403
MA0095.2	YY1	C2H2 zinc finger factors	More than 3 adjacent zinc fingers	4	17	28388	93139	0.190476	0.233594	-0.373346	0.799447	0.978641
MA0076.2	ELK4	Tryptophan cluster factors	Ets-related	4	17	28146	93381	0.190476	0.231603	-0.357253	0.799705	0.978641
MA0017.2	NR2F1	Nuclear receptors with C4 zinc fingers	RXR-related receptors (NR2)	4	17	30109	91418	0.190476	0.247756	-0.485153	0.800269	0.978641
MA0606.1	NFAT5	Rel homology region (RHR) factors	NFAT-related factors	6	15	30331	91196	0.285714	0.249582	0.266289	0.800706	0.978641
MA0515.1	Sox6	High-mobility group (HMG) domain factors	SOX-related factors	6	15	31864	89663	0.285714	0.262197	0.170638	0.805573	0.98249
MA0738.1	HIC2	C2H2 zinc finger factors	Factors with multiple dispersed zinc fingers	5	16	34977	86550	0.238095	0.287813	-0.370914	0.810276	0.983402
MA0813.1	TFAP2B	Basic helix-span-helix factors (bHSH)	AP-2	5	16	35439	86088	0.238095	0.291614	-0.397559	0.810569	0.983402
MA1123.1	TWIST1	Basic helix-loop-helix factors (bHLH)	Tal-related	5	16	33359	88168	0.238095	0.274499	-0.27588	0.811478	0.983402
MA0002.2	Runx1	Runt domain factors	Runt-related factors	6	15	39603	81924	0.285714	0.325878	-0.273225	0.818338	0.98759
MA1114.1	PBX3	Homeo domain factors	TALE-type homeo domain factors	6	15	39557	81970	0.285714	0.3255	-0.270739	0.818388	0.98759
MA0103.3	ZEB1	Homeo domain factors	HD-ZF factors	7	14	45129	76398	0.333333	0.37135	-0.240561	0.823737	0.989869
MA0108.2	TBP	TATA-binding proteins	TBP-related factors	1	20	10171	111356	0.047619	0.0836933	-0.869223	1	1
MA0062.2	Gabpa	Tryptophan cluster factors	Ets-related	4	17	23056	98471	0.190476	0.189719	0.00709389	1	1
MA0160.1	NR4A2	Nuclear receptors with C4 zinc fingers	NGFI-B-related receptors (NR4)	4	17	22290	99237	0.190476	0.183416	0.0670274	1	1
MA0500.1	Myog	Basic helix-loop-helix factors (bHLH)	MyoDASC-related factors	9	12	51386	70141	0.428571	0.422836	0.0338569	1	1
MA0521.1	Tcf12	Basic helix-loop-helix factors (bHLH)	E2A	9	12	50531	70996	0.428571	0.415801	0.0754978	1	1
MA0623.1	Neurog1	Basic helix-loop-helix factors (bHLH)	Tal-related	1	20	10640	110887	0.047619	0.0875526	-0.940365	1	1
MA0647.1	GRHL1	Grainyhead domain factors	Grainyhead-related factors	1	20	7821	113706	0.047619	0.0643561	-0.460135	1	1
MA0043.2	HLF	Basic leucine zipper factors (bZIP)	CEBP-related	1	20	6365	115162	0.047619	0.0523752	-0.144568	1	1
MA0153.2	HNF1B	Homeo domain factors	POU domain factors	1	20	9186	112341	0.047619	0.0755881	-0.709683	1	1
MA0656.1	JDP2	Basic leucine zipper factors (bZIP)	Fos-related	1	20	8382	113145	0.047619	0.0689723	-0.567226	1	1
MA0668.1	NEUROD2	Basic helix-loop-helix factors (bHLH)	Tal-related	1	20	9074	112453	0.047619	0.0746665	-0.690543	1	1
MA0691.1	TFAP4	Basic helix-loop-helix factors (bHLH)	bHLH-ZIP	4	17	27315	94212	0.190476	0.224765	-0.301239	1	1
MA0761.1	ETV1	Tryptophan cluster factors	Ets-related	1	20	10066	111461	0.047619	0.0828293	-0.852889	1	1
MA0792.1	POU5F1B	Homeo domain factors	POU domain factors	3	18	16768	104759	0.142857	0.137978	0.0583393	1	1
MA0840.1	Creb5	Basic leucine zipper factors (bZIP)	CREB-related factors	1	20	7191	114336	0.047619	0.059172	-0.330993	1	1
MA0858.1	Rarb	Nuclear receptors with C4 zinc fingers	Thyroid hormone receptor-related factors (NR1)	3	18	18616	102911	0.142857	0.153184	-0.11821	1	1
MA0868.1	SOX8	High-mobility group (HMG) domain factors	SOX-related factors	3	18	17752	103775	0.142857	0.146075	-0.0375597	1	1
MA0018.3	CREB1	Basic leucine zipper factors (bZIP)	CREB-related factors	2	19	13453	108074	0.0952381	0.1107	-0.241948	1	1
MA1110.1	NR1H4	Nuclear receptors with C4 zinc fingers	Thyroid hormone receptor-related factors (NR1)	2	19	16361	105166	0.0952381	0.134629	-0.563587	1	1
MA1139.1	FOSL2::JUNB	Basic leucine zipper factors (bZIP)::Basic leucine zipper factors (bZIP)	Fos-related::Jun-related	1	20	6450	115077	0.047619	0.0530746	-0.164773	1	1
MA1140.1	JUNB	Basic leucine zipper factors (bZIP)	Jun-related	0	21	4917	116610	0	0.0404601	-inf	1	1
MA0025.1	NFIL3	Basic leucine zipper factors (bZIP)	CEBP-related	1	20	8780	112747	0.047619	0.0722473	-0.639248	1	1
MA0041.1	Foxd3	Fork headwinged helix factors	FOX	5	16	31732	89795	0.238095	0.261111	-0.177371	1	1
MA0051.1	IRF2	Tryptophan cluster factors	Interferon-regulatory factors	3	18	21829	99698	0.142857	0.179623	-0.393638	1	1
MA0069.1	PAX6	Paired box factors	Paired plus homeo domain	1	20	10160	111367	0.047619	0.0836028	-0.867519	1	1
MA0073.1	RREB1	C2H2 zinc finger factors	Factors with multiple dispersed zinc fingers	10	11	58258	63269	0.47619	0.479383	-0.0184622	1	1
MA0084.1	SRY	High-mobility group (HMG) domain factors	SOX-related factors	2	19	16039	105488	0.0952381	0.131979	-0.5305	1	1
MA0107.1	RELA	Rel homology region (RHR) factors	NF-kappaB-related factors	4	17	27520	94007	0.190476	0.226452	-0.315167	1	1
MA0111.1	Spz1	Basic helix-loop-helix factors (bHLH)		4	17	27231	94296	0.190476	0.224074	-0.29551	1	1
MA0519.1	Stat5a::Stat5b	STAT domain factors::STAT domain factors	STAT factors::STAT factors	5	16	30352	91175	0.238095	0.249755	-0.0912137	1	1
MA0504.1	NR2C2	Nuclear receptors with C4 zinc fingers	RXR-related receptors (NR2)	8	13	47023	74504	0.380952	0.386935	-0.03649	1	1
MA0497.1	MEF2C	MADS box factors	Regulators of differentiation	6	15	35259	86268	0.285714	0.290133	-0.0311099	1	1
MA0493.1	Klf1	C2H2 zinc finger factors	Three-zinc finger Kruppel-related	9	12	51671	69856	0.428571	0.425181	0.0199958	1	1
MA0479.1	FOXH1	Fork headwinged helix factors	FOX	3	18	18920	102607	0.142857	0.155686	-0.145864	1	1
MA0465.1	CDX2	Homeo domain factors	HOX	3	18	18216	103311	0.142857	0.149893	-0.0812602	1	1
MA0523.1	TCF7L2	High-mobility group (HMG) domain factors	TCF-7-related factors	4	17	24903	96624	0.190476	0.204917	-0.131394	1	1
MA0258.2	ESR2	Nuclear receptors with C4 zinc fingers	Steroid hormone receptors (NR3)	6	15	35802	85725	0.285714	0.294601	-0.0622253	1	1
MA0050.2	IRF1	Tryptophan cluster factors	Interferon-regulatory factors	10	11	58658	62869	0.47619	0.482675	-0.0374882	1	1
MA0137.3	STAT1	STAT domain factors	STAT factors	5	16	28656	92871	0.238095	0.235799	0.0183194	1	1
MA0144.2	STAT3	STAT domain factors	STAT factors	6	15	37413	84114	0.285714	0.307858	-0.153117	1	1
MA0140.2	GATA1::TAL1	Other C4 zinc finger-type factors::Basic helix-loop-helix factors (bHLH)	C4-GATA-related::Tal-related	2	19	15066	106461	0.0952381	0.123972	-0.426967	1	1
MA0595.1	SREBF1	Basic helix-loop-helix factors (bHLH)	bHLH-ZIP	4	17	26898	94629	0.190476	0.221334	-0.272674	1	1
MA0609.1	Crem	Basic leucine zipper factors (bZIP)	CREB-related factors	0	21	3731	117796	0	0.030701	-inf	1	1
MA0613.1	FOXG1	Fork headwinged helix factors	FOX	2	19	15358	106169	0.0952381	0.126375	-0.458623	1	1
MA0615.1	Gmeb1	SAND domain factors	GMEB	0	21	4706	116821	0	0.0387239	-inf	1	1
MA0598.2	EHF	Tryptophan cluster factors	Ets-related	3	18	18273	103254	0.142857	0.150362	-0.0865657	1	1
MA0136.2	ELF5	Tryptophan cluster factors	Ets-related	4	17	23862	97665	0.190476	0.196351	-0.0543504	1	1
MA0652.1	IRF8	Tryptophan cluster factors	Interferon-regulatory factors	3	18	16952	104575	0.142857	0.139492	0.040053	1	1
MA0663.1	MLX	Basic helix-loop-helix factors (bHLH)	bHLH-ZIP	1	20	8104	113423	0.047619	0.0666848	-0.515018	1	1
MA0664.1	MLXIPL	Basic helix-loop-helix factors (bHLH)	bHLH-ZIP	1	20	8181	113346	0.047619	0.0673184	-0.529643	1	1
MA0678.1	OLIG2	Basic helix-loop-helix factors (bHLH)	Tal-related	1	20	8280	113247	0.047619	0.068133	-0.548259	1	1
MA0681.1	Phox2b	Homeo domain factors	Paired-related HD factors	1	20	11042	110485	0.047619	0.0908605	-0.999125	1	1
MA0083.3	SRF	MADS box factors	Responders to external signals (SRFRLM1)	1	20	8111	113416	0.047619	0.0667424	-0.516353	1	1
MA0696.1	ZIC1	C2H2 zinc finger factors	More than 3 adjacent zinc fingers	7	14	42105	79422	0.333333	0.346466	-0.0844574	1	1
MA0711.1	OTX1	Homeo domain factors	Paired-related HD factors	1	20	5996	115531	0.047619	0.0493388	-0.0537921	1	1
MA0713.1	PHOX2A	Homeo domain factors	Paired-related HD factors	2	19	11453	110074	0.0952381	0.0942424	0.0167501	1	1
MA0719.1	RHOXF1	Homeo domain factors	Paired-related HD factors	2	19	14452	107075	0.0952381	0.11892	-0.358631	1	1
MA0730.1	RARA	Nuclear receptors with C4 zinc fingers	Thyroid hormone receptor-related factors (NR1)	4	17	25937	95590	0.190476	0.213426	-0.205612	1	1
MA0748.1	YY2	C2H2 zinc finger factors	More than 3 adjacent zinc fingers	1	20	9360	112167	0.047619	0.0770199	-0.738997	1	1
MA0749.1	ZBED1	C2H2 zinc finger factors	BED zinc finger factors	0	21	1949	119578	0	0.0160376	-inf	1	1
MA0753.1	ZNF740	C2H2 zinc finger factors	Other factors with up to three adjacent zinc fingers	7	14	43749	77778	0.333333	0.359994	-0.169908	1	1
MA0469.2	E2F3	Fork headwinged helix factors	E2F	0	21	3612	117915	0	0.0297218	-inf	1	1
MA0473.2	ELF1	Tryptophan cluster factors	Ets-related	3	18	17256	104271	0.142857	0.141993	0.0102058	1	1
MA0764.1	ETV4	Tryptophan cluster factors	Ets-related	1	20	10162	111365	0.047619	0.0836193	-0.867829	1	1
MA0765.1	ETV5	Tryptophan cluster factors	Ets-related	1	20	10479	111048	0.047619	0.0862278	-0.916269	1	1
MA0770.1	HSF2	Heat shock factors	HSF factors	3	18	17135	104392	0.142857	0.140997	0.0220321	1	1
MA0498.2	MEIS1	Homeo domain factors	TALE-type homeo domain factors	2	19	11620	109907	0.0952381	0.0956166	-0.00632618	1	1
MA0774.1	MEIS2	Homeo domain factors	TALE-type homeo domain factors	5	16	27837	93690	0.238095	0.22906	0.072826	1	1
MA0775.1	MEIS3	Homeo domain factors	TALE-type homeo domain factors	4	17	22573	98954	0.190476	0.185745	0.044701	1	1
MA0789.1	POU3F4	Homeo domain factors	POU domain factors	3	18	16699	104828	0.142857	0.13741	0.0652405	1	1
MA0794.1	PROX1	Homeo domain factors	HD-PROS factors	1	20	9047	112480	0.047619	0.0744444	-0.685896	1	1
MA0600.2	RFX2	Fork headwinged helix factors	RFX-related factors	2	19	12037	109490	0.0952381	0.0990479	-0.0626781	1	1
MA0795.1	SMAD3	SMADNF-1 DNA-binding domain factors	SMAD factors	1	20	6988	114539	0.047619	0.0575016	-0.287118	1	1
MA0798.1	RFX3	Fork headwinged helix factors	RFX-related factors	2	19	13684	107843	0.0952381	0.1126	-0.269608	1	1
MA0802.1	TBR1	T-Box factors	TBrain-related factors	3	18	19382	102145	0.142857	0.159487	-0.187112	1	1
MA0822.1	HES7	Basic helix-loop-helix factors (bHLH)	Hairy-related factors	3	18	16975	104552	0.142857	0.139681	0.0377791	1	1
MA0833.1	ATF4	Basic leucine zipper factors (bZIP)	ATF-4-related factors	2	19	12849	108678	0.0952381	0.10573	-0.167613	1	1
MA0845.1	FOXB1	Fork headwinged helix factors	FOX	3	18	19654	101873	0.142857	0.161725	-0.211084	1	1
MA0862.1	GMEB2	SAND domain factors	GMEB	0	21	1652	119875	0	0.0135937	-inf	1	1
MA0865.1	E2F8	Fork headwinged helix factors	E2F	3	18	19230	102297	0.142857	0.158236	-0.173598	1	1
MA0884.1	DUXA	Homeo domain factors	Paired-related HD factors	2	19	11945	109582	0.0952381	0.0982909	-0.0503966	1	1
MA0914.1	ISL2	Homeo domain factors	HD-LIM	2	19	12429	109098	0.0952381	0.102274	-0.114093	1	1
MA1103.1	FOXK2	Fork headwinged helix factors	FOX	3	18	18280	103247	0.142857	0.150419	-0.0872163	1	1
MA1106.1	HIF1A	Basic helix-loop-helix factors (bHLH)	PAS domain factors	1	20	10092	111435	0.047619	0.0830433	-0.856948	1	1
MA1108.1	MXI1	Basic helix-loop-helix factors (bHLH)	bHLH-ZIP	3	18	17692	103835	0.142857	0.145581	-0.0318406	1	1
MA1118.1	SIX1	Homeo domain factors	HD-SINE	2	19	16068	105459	0.0952381	0.132218	-0.533503	1	1
MA1154.1	ZNF282	C2H2 zinc finger factors	More than 3 adjacent zinc fingers	4	17	24171	97356	0.190476	0.198894	-0.0774999	1	1
MA1129.1	FOSL1::JUN	Basic leucine zipper factors (bZIP)::Basic leucine zipper factors (bZIP)	Fos-related::Jun-related	1	20	5729	115798	0.047619	0.0471418	0.0152567	1	1
MA1133.1	JUN::JUNB	Basic leucine zipper factors (bZIP)::Basic leucine zipper factors (bZIP)	Jun-related::Jun-related	1	20	10076	111451	0.047619	0.0829116	-0.854451	1	1
MA1136.1	FOSB::JUNB	Basic leucine zipper factors (bZIP)::Basic leucine zipper factors (bZIP)	Fos-related::Jun-related	1	20	6354	115173	0.047619	0.0522847	-0.141935	1	1
MA1143.1	FOSL1::JUND	Basic leucine zipper factors (bZIP)::Basic leucine zipper factors (bZIP)	Fos-related::Jun-related	1	20	7926	113601	0.047619	0.0652201	-0.48071	1	1
MA1147.1	NR4A2::RXRA	Nuclear receptors with C4 zinc fingers::Nuclear receptors with C4 zinc fingers	NGFI-B-related receptors (NR4)::RXR-related receptors (NR2)	2	19	15503	106024	0.0952381	0.127568	-0.474152	1	1
MA1148.1	PPARA::RXRA	Nuclear receptors with C4 zinc fingers::Nuclear receptors with C4 zinc fingers	Thyroid hormone receptor-related factors (NR1)::RXR-related receptors (NR2)	4	17	25851	95676	0.190476	0.212718	-0.199523	1	1
MA1419.1	IRF4	Tryptophan cluster factors	Interferon-regulatory factors	2	19	14066	107461	0.0952381	0.115744	-0.314361	1	1
MA1420.1	IRF5	Tryptophan cluster factors	Interferon-regulatory factors	2	19	12642	108885	0.0952381	0.104026	-0.141431	1	1
MA0597.1	THAP1	C2CH THAP-type zinc finger factors	THAP-related factors	7	14	41929	79598	0.333333	0.345018	-0.0752197	1	1

## Sheet: 3.AD_vs_0.NCI_Immature.down
Motif	Motif Name	Class	Family	Hits in list	Unhit in list	Hits in background	Unhit in background	Percent in list	Percent in background	Log2 Odds Ratio	PValue	QValue
MA0516.1	SP2	C2H2 zinc finger factors	Three-zinc finger Kruppel-related	30404	10843	76138	45389	0.73712	0.626511	0.741212	0	0
MA0506.1	NRF1	Basic leucine zipper factors (bZIP)	Jun-related	15487	25760	27532	93995	0.37547	0.22655	1.0374	0	0
MA0470.1	E2F4	Fork headwinged helix factors	E2F	15829	25418	28741	92786	0.383761	0.236499	1.00752	0	0
MA0527.1	ZBTB33	C2H2 zinc finger factors	Other factors with up to three adjacent zinc fingers	8170	33077	12866	108661	0.198075	0.105869	1.06079	0	0
MA0079.3	SP1	C2H2 zinc finger factors	Three-zinc finger Kruppel-related	30233	11014	76011	45516	0.732975	0.625466	0.71694	0	0
MA0599.1	KLF5	C2H2 zinc finger factors	Three-zinc finger Kruppel-related	28649	12598	71516	50011	0.694572	0.588478	0.669256	0	0
MA0632.1	Tcfl5	Basic helix-loop-helix factors (bHLH)	PAS domain factors	8451	32796	13384	108143	0.204888	0.110132	1.05804	0	0
MA0131.2	HINFP	C2H2 zinc finger factors	Factors with multiple dispersed zinc fingers	12050	29197	21420	100107	0.292142	0.176257	0.947745	0	0
MA0685.1	SP4	C2H2 zinc finger factors	Three-zinc finger Kruppel-related	20883	20364	45188	76339	0.506291	0.371835	0.792823	0	0
MA0472.2	EGR2	C2H2 zinc finger factors	Three-zinc finger Kruppel-related	14219	27028	26733	94794	0.344728	0.219976	0.899561	0	0
MA0732.1	EGR3	C2H2 zinc finger factors	Three-zinc finger Kruppel-related	19381	21866	38698	82829	0.469877	0.318431	0.923851	0	0
MA0733.1	EGR4	C2H2 zinc finger factors	Three-zinc finger Kruppel-related	19291	21956	40056	81471	0.467695	0.329606	0.837614	0	0
MA0740.1	KLF14	C2H2 zinc finger factors	Three-zinc finger Kruppel-related	18870	22377	39032	82495	0.457488	0.32118	0.833761	0	0
MA0741.1	KLF16	C2H2 zinc finger factors	Three-zinc finger Kruppel-related	25387	15860	59159	62368	0.615487	0.486797	0.754876	0	0
MA0746.1	SP3	C2H2 zinc finger factors	Three-zinc finger Kruppel-related	25692	15555	59929	61598	0.622882	0.493133	0.763542	0	0
MA0747.1	SP8	C2H2 zinc finger factors	Three-zinc finger Kruppel-related	24092	17155	56221	65306	0.584091	0.462621	0.705998	0	0
MA0751.1	ZIC4	C2H2 zinc finger factors	More than 3 adjacent zinc fingers	18641	22606	41770	79757	0.451936	0.34371	0.654845	0	0
MA0810.1	TFAP2A	Basic helix-span-helix factors (bHSH)	AP-2	19720	21527	43944	77583	0.478095	0.361599	0.693521	0	0
MA0003.3	TFAP2A	Basic helix-span-helix factors (bHSH)	AP-2	17281	23966	37746	83781	0.418964	0.310598	0.678549	0	0
MA1102.1	CTCFL	C2H2 zinc finger factors	More than 3 adjacent zinc fingers	25476	15771	61315	60212	0.617645	0.504538	0.665652	0	0
MA1122.1	TFDP1	Fork headwinged helix factors	E2F	16027	25220	29482	92045	0.388562	0.242596	0.988449	0	0
MA0162.3	EGR1	C2H2 zinc finger factors	Three-zinc finger Kruppel-related	14428	26819	26276	95251	0.349795	0.216215	0.963614	0	0
MA0812.1	TFAP2B	Basic helix-span-helix factors (bHSH)	AP-2	16291	24956	35575	85952	0.394962	0.292733	0.657397	0	0
MA1099.1	Hes1	Basic helix-loop-helix factors (bHLH)	Hairy-related factors	8851	32396	16284	105243	0.214585	0.133995	0.820211	0	0
MA0872.1	TFAP2A	Basic helix-span-helix factors (bHSH)	AP-2	16146	25101	35208	86319	0.391447	0.289713	0.657246	0	0
MA0815.1	TFAP2C	Basic helix-span-helix factors (bHSH)	AP-2	15498	25749	33456	88071	0.375736	0.275297	0.663999	0	0
MA0750.2	ZBTB7A	C2H2 zinc finger factors	More than 3 adjacent zinc fingers	16444	24803	36047	85480	0.398671	0.296617	0.652797	0	0
MA0813.1	TFAP2B	Basic helix-span-helix factors (bHSH)	AP-2	16096	25151	35439	86088	0.390234	0.291614	0.6366	3.76503e-296	7.69141e-295
MA0696.1	ZIC1	C2H2 zinc finger factors	More than 3 adjacent zinc fingers	18397	22850	42105	79422	0.44602	0.346466	0.602757	5.04253e-282	9.94596e-281
MA0742.1	Klf12	C2H2 zinc finger factors	Three-zinc finger Kruppel-related	17125	24122	38650	82877	0.415182	0.318036	0.606311	2.15924e-277	4.11696e-276
MA0736.1	GLIS2	C2H2 zinc finger factors	More than 3 adjacent zinc fingers	15380	25867	34131	87396	0.372876	0.280851	0.60646	1.4652e-263	2.70353e-262
MA0811.1	TFAP2B	Basic helix-span-helix factors (bHSH)	AP-2	16942	24305	38489	83038	0.410745	0.316712	0.58873	8.25359e-261	1.47533e-259
MA0493.1	Klf1	C2H2 zinc finger factors	Three-zinc finger Kruppel-related	21560	19687	51671	69856	0.522705	0.425181	0.566106	2.59105e-258	4.49116e-257
MA1107.1	KLF9	C2H2 zinc finger factors	Three-zinc finger Kruppel-related	25012	16235	61899	59628	0.606396	0.509344	0.569567	3.05238e-257	5.13518e-256
MA0524.2	TFAP2C	Basic helix-span-helix factors (bHSH)	AP-2	16669	24578	37936	83591	0.404126	0.312161	0.579631	2.85721e-251	4.66949e-250
MA0146.2	Zfx	C2H2 zinc finger factors	More than 3 adjacent zinc fingers	23641	17606	58000	63527	0.573157	0.47726	0.556516	5.71383e-249	9.07864e-248
MA0753.1	ZNF740	C2H2 zinc finger factors	Other factors with up to three adjacent zinc fingers	18707	22540	43749	77778	0.453536	0.359994	0.561146	8.38169e-247	1.29576e-245
MA0697.1	ZIC3	C2H2 zinc finger factors	More than 3 adjacent zinc fingers	18627	22620	43550	77977	0.451596	0.358357	0.560115	1.36333e-245	2.05217e-244
MA0471.1	E2F6	Fork headwinged helix factors	E2F	22894	18353	56010	65517	0.555046	0.460885	0.545111	8.23264e-240	1.20745e-238
MA0163.1	PLAG1	C2H2 zinc finger factors	More than 3 adjacent zinc fingers	23923	17324	59092	62435	0.579994	0.486246	0.544996	2.28176e-238	3.26292e-237
MA0062.2	Gabpa	Tryptophan cluster factors	Ets-related	10949	30298	23056	98471	0.26545	0.189719	0.626129	9.63945e-226	1.34482e-224
MA0765.1	ETV5	Tryptophan cluster factors	Ets-related	5821	35426	10479	111048	0.141125	0.0862278	0.800091	1.32514e-211	1.80471e-210
MA0695.1	ZBTB7C	C2H2 zinc finger factors	More than 3 adjacent zinc fingers	12247	29000	26976	94551	0.296919	0.221975	0.56579	1.83046e-201	2.43493e-200
MA0028.2	ELK1	Tryptophan cluster factors	Ets-related	6132	35115	11572	109955	0.148665	0.0952216	0.730529	6.29542e-188	8.18405e-187
MA0735.1	GLIS1	C2H2 zinc finger factors	More than 3 adjacent zinc fingers	8582	32665	17749	103778	0.208064	0.14605	0.619327	9.14313e-184	1.16219e-182
MA0694.1	ZBTB7B	C2H2 zinc finger factors	More than 3 adjacent zinc fingers	11232	30015	24747	96780	0.272311	0.203634	0.549383	1.281e-179	1.59289e-178
MA0814.1	TFAP2C	Basic helix-span-helix factors (bHSH)	AP-2	16507	24740	39688	81839	0.400199	0.326578	0.460262	2.70642e-160	3.29377e-159
MA0076.2	ELK4	Tryptophan cluster factors	Ets-related	12319	28928	28146	93381	0.298664	0.231603	0.49863	4.88815e-159	5.82505e-158
MA0761.1	ETV1	Tryptophan cluster factors	Ets-related	5314	35933	10066	111461	0.128834	0.0828293	0.711531	6.20016e-158	7.23774e-157
MA0759.1	ELK3	Tryptophan cluster factors	Ets-related	5934	35313	11600	109927	0.143865	0.095452	0.671222	1.82628e-156	2.08927e-155
MA0764.1	ETV4	Tryptophan cluster factors	Ets-related	5338	35909	10162	111365	0.129415	0.0836193	0.70406	1.41256e-155	1.58428e-154
MA0504.1	NR2C2	Nuclear receptors with C4 zinc fingers	RXR-related receptors (NR2)	18811	22436	47023	74504	0.456057	0.386935	0.409682	7.29093e-134	8.02003e-133
MA1125.1	ZNF384	C2H2 zinc finger factors	More than 3 adjacent zinc fingers	12695	28552	45478	76049	0.30778	0.374221	-0.427565	1.00692e-132	1.08671e-131
MA0014.3	PAX5	Paired box factors	Paired domain only	9510	31737	21293	100234	0.230562	0.175212	0.496269	2.01984e-131	2.13954e-130
MA0050.2	IRF1	Tryptophan cluster factors	Interferon-regulatory factors	17126	24121	58658	62869	0.415206	0.482675	-0.39407	4.92547e-125	5.12249e-124
MA0748.1	YY2	C2H2 zinc finger factors	More than 3 adjacent zinc fingers	4767	36480	9360	112167	0.115572	0.0770199	0.647039	1.06928e-120	1.09219e-119
MA0156.2	FEV	Tryptophan cluster factors	Ets-related	5421	35826	11038	110489	0.131428	0.0908276	0.598972	2.15587e-117	2.12614e-116
MA1100.1	ASCL1	Basic helix-loop-helix factors (bHLH)	MyoDASC-related factors	23630	17617	61772	59755	0.57289	0.508299	0.375747	2.12718e-114	2.06228e-113
MA0155.1	INSM1	C2H2 zinc finger factors	Factors with multiple dispersed zinc fingers	18375	22872	46534	74993	0.445487	0.382911	0.372606	1.45508e-110	1.38717e-109
MA1108.1	MXI1	Basic helix-loop-helix factors (bHLH)	bHLH-ZIP	7950	33297	17692	103835	0.192741	0.145581	0.486755	2.82145e-110	2.64569e-109
MA0139.1	CTCF	C2H2 zinc finger factors	More than 3 adjacent zinc fingers	22849	18398	59611	61916	0.553955	0.490517	0.367304	5.23541e-110	4.83009e-109
MA0528.1	ZNF263	C2H2 zinc finger factors	More than 3 adjacent zinc fingers	34153	7094	94651	26876	0.828012	0.778847	0.451026	3.96998e-103	3.60449e-102
MA0147.3	MYC	Basic helix-loop-helix factors (bHLH)	bHLH-ZIP	9879	31368	23063	98464	0.239508	0.189777	0.427175	7.43183e-102	6.6422e-101
MA0763.1	ETV3	Tryptophan cluster factors	Ets-related	5285	35962	11055	110472	0.128131	0.0909674	0.554408	1.25606e-99	1.08858e-98
MA0041.1	Foxd3	Fork headwinged helix factors	FOX	8657	32590	31732	89795	0.209882	0.261111	-0.41179	1.54534e-98	1.3193e-97
MA0475.2	FLI1	Tryptophan cluster factors	Ets-related	5928	35319	12731	108796	0.14372	0.104759	0.520377	6.58778e-98	5.54148e-97
MA0823.1	HEY1	Basic helix-loop-helix factors (bHLH)	Hairy-related factors	5999	35248	12961	108566	0.145441	0.106651	0.511572	7.69716e-96	6.38083e-95
MA0615.1	Gmeb1	SAND domain factors	GMEB	2645	38602	4706	116821	0.0641259	0.0387239	0.766312	3.59532e-95	2.93789e-94
MA0473.2	ELF1	Tryptophan cluster factors	Ets-related	7597	33650	17256	104271	0.184183	0.141993	0.44806	4.63546e-91	3.73449e-90
MA1152.1	SOX15	High-mobility group (HMG) domain factors	SOX-related factors	7907	33340	28952	92575	0.191699	0.238235	-0.399081	5.81496e-87	4.61966e-86
MA0846.1	FOXC2	Fork headwinged helix factors	FOX	7563	33684	27780	93747	0.183359	0.228591	-0.400288	8.63581e-85	6.76669e-84
MA0142.1	Pou5f1::Sox2	Homeo domain factors::High-mobility group (HMG) domain factors	POU domain factors::SOX-related factors	6745	34502	25111	96416	0.163527	0.206629	-0.413803	2.25889e-83	1.74606e-82
MA0645.1	ETV6	Tryptophan cluster factors	Ets-related	9393	31854	22372	99155	0.227726	0.184091	0.386202	3.91842e-81	2.98845e-80
MA0641.1	ELF4	Tryptophan cluster factors	Ets-related	8035	33212	18707	102820	0.194802	0.153933	0.411146	4.58376e-81	3.44988e-80
MA0497.1	MEF2C	MADS box factors	Regulators of differentiation	9979	31268	35259	86268	0.241933	0.290133	-0.356883	5.3166e-81	3.94947e-80
MA0073.1	RREB1	C2H2 zinc finger factors	Factors with multiple dispersed zinc fingers	22003	19244	58258	63269	0.533445	0.479383	0.312325	2.77808e-80	2.03726e-79
MA1149.1	RARA::RXRG	Nuclear receptors with C4 zinc fingers::Nuclear receptors with C4 zinc fingers	Thyroid hormone receptor-related factors (NR1)::RXR-related receptors (NR2)	12845	28402	31946	89581	0.311417	0.262872	0.342721	8.4856e-80	6.14401e-79
MA0474.2	ERG	Tryptophan cluster factors	Ets-related	5846	35401	12972	108555	0.141732	0.106742	0.466682	4.02547e-79	2.87821e-78
MA0098.3	ETS1	Tryptophan cluster factors	Ets-related	6747	34500	15347	106180	0.163576	0.126285	0.436202	1.1642e-78	8.22123e-78
MA0597.1	THAP1	C2CH THAP-type zinc finger factors	THAP-related factors	16355	24892	41929	79598	0.396514	0.345018	0.318808	1.63323e-78	1.13928e-77
MA0657.1	KLF13	C2H2 zinc finger factors	Three-zinc finger Kruppel-related	9404	31843	22517	99010	0.227992	0.185284	0.376961	1.55524e-77	1.07181e-76
MA0649.1	HEY2	Basic helix-loop-helix factors (bHLH)	Hairy-related factors	6880	34367	15743	105784	0.1668	0.129543	0.427793	4.51553e-77	3.07486e-76
MA0138.2	REST	C2H2 zinc finger factors	Factors with multiple dispersed zinc fingers	17153	24094	44301	77226	0.415861	0.364536	0.311513	1.89015e-76	1.27196e-75
MA0517.1	STAT1::STAT2	STAT domain factors::STAT domain factors	STAT factors::STAT factors	13323	27924	45354	76173	0.323005	0.373201	-0.319533	5.62448e-76	3.74093e-75
MA0737.1	GLIS3	C2H2 zinc finger factors	More than 3 adjacent zinc fingers	11644	29603	28859	92668	0.282299	0.23747	0.336836	1.13902e-72	7.48876e-72
MA0067.1	Pax2	Paired box factors	Paired domain only	3808	37439	7924	113603	0.0923219	0.0652036	0.544188	4.89855e-72	3.18406e-71
MA0869.1	Sox11	High-mobility group (HMG) domain factors	SOX-related factors	5088	36159	19345	102182	0.123354	0.159183	-0.428087	9.31572e-72	5.98718e-71
MA0032.2	FOXC1	Fork headwinged helix factors	FOX	6065	35182	22400	99127	0.147041	0.184321	-0.390428	2.11856e-68	1.34646e-67
MA0686.1	SPDEF	Tryptophan cluster factors	Ets-related	4891	36356	10788	110739	0.118578	0.0887704	0.465669	1.28653e-67	8.08675e-67
MA0024.3	E2F1	Fork headwinged helix factors	E2F	2802	38445	5553	115974	0.0679322	0.0456935	0.606119	3.805e-66	2.36572e-65
MA0507.1	POU2F2	Homeo domain factors	POU domain factors	6327	34920	23147	98380	0.153393	0.190468	-0.376871	9.07397e-66	5.58098e-65
MA0734.1	GLI2	C2H2 zinc finger factors	More than 3 adjacent zinc fingers	9313	31934	22672	98855	0.225786	0.186559	0.346668	1.01287e-65	6.16345e-65
MA0619.1	LIN54	CRC domain		5355	35892	19979	101548	0.129828	0.1644	-0.39912	7.98916e-65	4.81032e-64
MA0845.1	FOXB1	Fork headwinged helix factors	FOX	5259	35988	19654	101873	0.1275	0.161725	-0.400802	1.85375e-64	1.10452e-63
MA0788.1	POU3F3	Homeo domain factors	POU domain factors	5212	36035	19495	102032	0.126361	0.160417	-0.401668	2.68715e-64	1.58459e-63
MA0760.1	ERF	Tryptophan cluster factors	Ets-related	5889	35358	13499	108028	0.142774	0.111078	0.414536	6.79182e-64	3.9642e-63
MA0104.4	MYCN	Basic helix-loop-helix factors (bHLH)	bHLH-ZIP	6853	34394	16095	105432	0.166145	0.13244	0.384293	6.21368e-63	3.59013e-62
MA0784.1	POU1F1	Homeo domain factors	POU domain factors	5301	35946	19647	101880	0.128518	0.161668	-0.387035	1.82827e-60	1.04577e-59
MA0515.1	Sox6	High-mobility group (HMG) domain factors	SOX-related factors	9185	32062	31864	89663	0.222683	0.262197	-0.310909	2.2038e-58	1.24809e-57
MA0606.1	NFAT5	Rel homology region (RHR) factors	NFAT-related factors	8696	32551	30331	91196	0.210827	0.249582	-0.316075	3.5869e-58	2.01148e-57
MA0786.1	POU3F1	Homeo domain factors	POU domain factors	5262	35985	19432	102095	0.127573	0.159899	-0.380341	5.02764e-58	2.79205e-57
MA0868.1	SOX8	High-mobility group (HMG) domain factors	SOX-related factors	4748	36499	17752	103775	0.115111	0.146075	-0.395098	1.15496e-57	6.35229e-57
MA0135.1	Lhx3	Homeo domain factors	HD-LIM	4183	37064	15898	105629	0.101413	0.130819	-0.415361	1.84617e-57	1.00572e-56
MA0676.1	Nr2e1	Nuclear receptors with C4 zinc fingers	RXR-related receptors (NR2)	4861	36386	18088	103439	0.117851	0.148839	-0.388422	8.46709e-57	4.56903e-56
MA0787.1	POU3F2	Homeo domain factors	POU domain factors	5124	36123	18937	102590	0.124227	0.155825	-0.380002	1.03886e-56	5.55355e-56
MA0502.1	NFYB	Heteromeric CCAAT-binding factors	Heteromeric CCAAT-binding	6499	34748	15354	106173	0.157563	0.126342	0.371108	1.75406e-56	9.29005e-56
MA0040.1	Foxq1	Fork headwinged helix factors	FOX	4718	36529	17610	103917	0.114384	0.144906	-0.39187	2.0655e-56	1.08391e-55
MA0047.2	Foxa2	Fork headwinged helix factors	FOX	6215	35032	22416	99111	0.150678	0.184453	-0.350275	4.84286e-56	2.51829e-55
MA0822.1	HES7	Basic helix-loop-helix factors (bHLH)	Hairy-related factors	7094	34153	16975	104552	0.171988	0.139681	0.355424	6.40399e-56	3.30007e-55
MA0149.1	EWSR1-FLI1	Tryptophan cluster factors	Ets-related	27437	13810	75631	45896	0.665188	0.622339	0.269797	2.56612e-55	1.31056e-54
MA0152.1	NFATC2	Rel homology region (RHR) factors	NFAT-related factors	8468	32779	29451	92076	0.2053	0.242341	-0.308138	2.37781e-54	1.20363e-53
MA0913.1	Hoxd9	Homeo domain factors	HOX	4915	36332	18166	103361	0.11916	0.149481	-0.377641	3.94268e-54	1.97826e-53
MA0683.1	POU4F2	Homeo domain factors	POU domain factors	4565	36682	17007	104520	0.110675	0.139944	-0.386853	1.61356e-53	8.02572e-53
MA0148.3	FOXA1	Fork headwinged helix factors	FOX	6482	34765	23152	98375	0.157151	0.190509	-0.335915	3.36219e-53	1.65791e-52
MA0767.1	GCM2	GCM domain factors	GCM	6588	34659	15729	105798	0.159721	0.129428	0.354522	1.94248e-52	9.49656e-52
MA0790.1	POU4F1	Homeo domain factors	POU domain factors	4715	36532	17445	104082	0.114311	0.143548	-0.377043	3.47238e-52	1.68322e-51
MA0029.1	Mecom	C2H2 zinc finger factors	Factors with multiple dispersed zinc fingers	4109	37138	15465	106062	0.0996194	0.127256	-0.398258	5.53509e-52	2.66057e-51
MA0785.1	POU2F1	Homeo domain factors	POU domain factors	4885	36362	17987	103540	0.118433	0.148008	-0.370886	6.0648e-52	2.89089e-51
MA0851.1	Foxj3	Fork headwinged helix factors	FOX	6379	34868	22730	98797	0.154654	0.187037	-0.330685	6.64128e-51	3.13951e-50
MA0084.1	SRY	High-mobility group (HMG) domain factors	SOX-related factors	4302	36945	16039	105488	0.104298	0.131979	-0.384928	1.87609e-50	8.79608e-50
MA0259.1	ARNT::HIF1A	Basic helix-loop-helix factors (bHLH)::Basic helix-loop-helix factors (bHLH)	PAS domain factors::PAS domain factors	5142	36105	11931	109596	0.124664	0.0981757	0.387615	2.65779e-50	1.23598e-49
MA0593.1	FOXP2	Fork headwinged helix factors	FOX	7786	33461	27115	94412	0.188765	0.223119	-0.303603	8.51739e-50	3.92899e-49
MA0523.1	TCF7L2	High-mobility group (HMG) domain factors	TCF-7-related factors	7091	34156	24903	96624	0.171916	0.204917	-0.311964	4.25678e-49	1.9479e-48
MA1115.1	POU5F1	Homeo domain factors	POU domain factors	6669	34578	23571	97956	0.161684	0.193957	-0.319135	4.34915e-49	1.97438e-48
MA0052.3	MEF2A	MADS box factors	Regulators of differentiation	7279	33968	25480	96047	0.176473	0.209665	-0.307938	8.32544e-49	3.74973e-48
MA0878.1	CDX1	Homeo domain factors	HOX	4747	36500	17416	104111	0.115087	0.14331	-0.363223	1.17526e-48	5.25195e-48
MA1106.1	HIF1A	Basic helix-loop-helix factors (bHLH)	PAS domain factors	4425	36822	10092	111435	0.107281	0.0830433	0.408097	1.25173e-48	5.52348e-48
MA0604.1	Atf1	Basic leucine zipper factors (bZIP)	CREB-related factors	2934	38313	6247	115280	0.0711324	0.0514042	0.498938	1.25534e-48	5.52348e-48
MA0866.1	SOX21	High-mobility group (HMG) domain factors	SOX-related factors	4189	37058	15594	105933	0.101559	0.128317	-0.381073	2.38929e-48	1.04326e-47
MA0867.1	SOX4	High-mobility group (HMG) domain factors	SOX-related factors	5420	35827	19566	101961	0.131403	0.161001	-0.343135	2.72488e-48	1.18078e-47
MA0899.1	HOXA10	Homeo domain factors	HOX	4797	36450	17560	103967	0.116299	0.144495	-0.360006	3.30981e-48	1.42347e-47
MA0465.1	CDX2	Homeo domain factors	HOX	5006	36241	18216	103311	0.121366	0.149893	-0.352229	8.89931e-48	3.79881e-47
MA0650.1	HOXA13	Homeo domain factors	HOX	5182	36065	18758	102769	0.125633	0.154353	-0.345243	3.50856e-47	1.48659e-46
MA0598.2	EHF	Tryptophan cluster factors	Ets-related	7452	33795	18273	103254	0.180668	0.150362	0.317346	4.78762e-47	2.01362e-46
MA0768.1	LEF1	High-mobility group (HMG) domain factors	TCF-7-related factors	6618	34629	23316	98211	0.160448	0.191859	-0.313001	6.24941e-47	2.60924e-46
MA0509.1	Rfx1	Fork headwinged helix factors	RFX-related factors	11789	29458	30340	91187	0.285815	0.249656	0.266356	6.66452e-47	2.7624e-46
MA0772.1	IRF7	Tryptophan cluster factors	Interferon-regulatory factors	7505	33742	26093	95434	0.181953	0.214709	-0.297731	1.10707e-46	4.55571e-46
MA0442.2	SOX10	High-mobility group (HMG) domain factors	SOX-related factors	9979	31268	33772	87755	0.241933	0.277897	-0.270044	1.27629e-46	5.21457e-46
MA0514.1	Sox3	High-mobility group (HMG) domain factors	SOX-related factors	12878	28369	42598	78929	0.312217	0.350523	-0.249635	4.82401e-46	1.95697e-45
MA0715.1	PROP1	Homeo domain factors	Paired-related HD factors	3080	38167	11864	109663	0.0746721	0.0976244	-0.422852	6.2744e-46	2.52744e-45
MA0039.3	KLF4	C2H2 zinc finger factors	Three-zinc finger Kruppel-related	14400	26847	37811	83716	0.349116	0.311133	0.247987	8.07349e-46	3.2294e-45
MA0627.1	Pou2f3	Homeo domain factors	POU domain factors	4979	36268	18023	103504	0.120712	0.148304	-0.342938	4.0462e-45	1.60724e-44
MA0646.1	GCM1	GCM domain factors	GCM	7534	33713	18575	102952	0.182656	0.152847	0.308768	4.19672e-45	1.65554e-44
MA0773.1	MEF2D	MADS box factors	Regulators of differentiation	6777	34470	23726	97801	0.164303	0.195232	-0.303293	7.10314e-45	2.78288e-44
MA0791.1	POU4F3	Homeo domain factors	POU domain factors	4564	36683	16666	104861	0.11065	0.137138	-0.353188	1.45152e-44	5.64811e-44
MA0602.1	Arid5a	ARID	ARID-related	2856	38391	11067	110460	0.0692414	0.0910662	-0.429456	2.21575e-44	8.56359e-44
MA0769.1	Tcf7	High-mobility group (HMG) domain factors	TCF-7-related factors	6802	34445	23766	97761	0.164909	0.195561	-0.299954	4.7962e-44	1.84122e-43
MA0789.1	POU3F4	Homeo domain factors	POU domain factors	4586	36661	16699	104828	0.111184	0.13741	-0.348695	1.20687e-43	4.6022e-43
MA0601.1	Arid3b	ARID	ARID-related	4035	37212	14910	106617	0.0978253	0.122689	-0.36699	1.7307e-43	6.55604e-43
MA0792.1	POU5F1B	Homeo domain factors	POU domain factors	4613	36634	16768	104759	0.111838	0.137978	-0.346062	3.51912e-43	1.3243e-42
MA0464.2	BHLHE40	Basic helix-loop-helix factors (bHLH)	Hairy-related factors	4139	37108	9507	112020	0.100347	0.0782295	0.394244	4.8903e-43	1.82827e-42
MA0910.1	Hoxd8	Homeo domain factors	HOX	3631	37616	13575	107952	0.0880306	0.111704	-0.38149	5.3028e-43	1.96961e-42
MA0483.1	Gfi1B	C2H2 zinc finger factors	More than 3 adjacent zinc fingers	10081	31166	33868	87659	0.244406	0.278687	-0.256328	2.24257e-42	8.27581e-42
MA0638.1	CREB3	Basic leucine zipper factors (bZIP)	CREB-related factors	3861	37386	8803	112724	0.0936068	0.0724366	0.403201	3.3671e-42	1.2346e-41
MA0608.1	Creb3l2	Basic leucine zipper factors (bZIP)	CREB-related factors	4183	37064	9663	111864	0.101413	0.0795132	0.385721	9.26657e-42	3.3761e-41
MA0901.1	HOXB13	Homeo domain factors	HOX	5032	36215	17998	103529	0.121997	0.148099	-0.323209	1.81846e-40	6.58329e-40
MA0757.1	ONECUT3	Homeo domain factors	HD-CUT	3678	37569	13630	107897	0.0891701	0.112156	-0.367705	2.21197e-40	7.95752e-40
MA0653.1	IRF9	Tryptophan cluster factors	Interferon-regulatory factors	6402	34845	22336	99191	0.155211	0.183795	-0.293562	2.52946e-40	9.04282e-40
MA0636.1	BHLHE41	Basic helix-loop-helix factors (bHLH)	Hairy-related factors	3410	37837	7687	113840	0.0826727	0.0632534	0.416486	4.10229e-40	1.45746e-39
MA0102.3	CEBPA	Basic leucine zipper factors (bZIP)	CEBP-related	5032	36215	17928	103599	0.121997	0.147523	-0.316615	8.06533e-39	2.84776e-38
MA0798.1	RFX3	Fork headwinged helix factors	RFX-related factors	5645	35602	13684	107843	0.136858	0.1126	0.321494	1.51285e-38	5.3089e-38
MA0909.1	HOXD13	Homeo domain factors	HOX	4977	36270	17735	103792	0.120663	0.145935	-0.31636	1.87285e-38	6.53215e-38
MA0713.1	PHOX2A	Homeo domain factors	Paired-related HD factors	3041	38206	11453	110074	0.0737266	0.0942424	-0.38646	6.74713e-38	2.339e-37
MA0603.1	Arntl	Basic helix-loop-helix factors (bHLH)	PAS domain factors	4424	36823	10448	111079	0.107256	0.0859727	0.35312	2.76894e-37	9.54116e-37
MA0105.4	NFKB1	Rel homology region (RHR) factors	NF-kappaB-related factors	9074	32173	23198	98329	0.219992	0.190888	0.25754	6.1064e-37	2.09153e-36
MA0060.3	NFYA	Other alpha	NFY	6589	34658	16336	105191	0.159745	0.134423	0.291878	1.45208e-36	4.94398e-36
MA0781.1	PAX9	Paired box factors	Paired domain only	5200	36047	12558	108969	0.12607	0.103335	0.323976	1.59794e-36	5.40843e-36
MA0674.1	NKX6-1	Homeo domain factors	NK	3243	38004	12053	109474	0.0786239	0.0991796	-0.367585	3.11145e-36	1.04691e-35
MA0520.1	Stat6	STAT domain factors	STAT factors	7188	34059	24584	96943	0.174267	0.202292	-0.265001	5.75084e-36	1.92367e-35
MA0681.1	Phox2b	Homeo domain factors	Paired-related HD factors	2938	38309	11042	110485	0.0712294	0.0908605	-0.381958	5.80345e-36	1.92999e-35
MA0046.2	HNF1A	Homeo domain factors	POU domain factors	3278	37969	12146	109381	0.0794724	0.0999449	-0.363084	1.04419e-35	3.45247e-35
MA1124.1	ZNF24	C2H2 zinc finger factors	More than 3 adjacent zinc fingers	6728	34519	23118	98409	0.163115	0.190229	-0.269408	2.24117e-35	7.36752e-35
MA0778.1	NFKB2	Rel homology region (RHR) factors	NF-kappaB-related factors	8820	32427	22586	98941	0.213834	0.185852	0.252759	5.69698e-35	1.8621e-34
MA0610.1	DMRT3	DM-type intertwined zinc finger factors	DMRT factors	2865	38382	10764	110763	0.0694596	0.0885729	-0.380592	6.57088e-35	2.13554e-34
MA0675.1	NKX6-2	Homeo domain factors	NK	3359	37888	12371	109156	0.0814362	0.101796	-0.354241	1.06817e-34	3.45193e-34
MA0072.1	RORA	Nuclear receptors with C4 zinc fingers	Thyroid hormone receptor-related factors (NR1)	4083	37164	14702	106825	0.098989	0.120977	-0.325001	1.81747e-34	5.8404e-34
MA0799.1	RFX4	Fork headwinged helix factors	RFX-related factors	5850	35397	14406	107121	0.141828	0.118542	0.297427	2.13976e-34	6.83766e-34
MA0510.2	RFX5	Fork headwinged helix factors	RFX-related factors	5799	35448	14267	107260	0.140592	0.117398	0.298576	2.19851e-34	6.98638e-34
MA0707.1	MNX1	Homeo domain factors	HOX	3708	37539	13476	108051	0.0898974	0.110889	-0.336391	4.7496e-34	1.50098e-33
MA0609.1	Crem	Basic leucine zipper factors (bZIP)	CREB-related factors	1798	39449	3731	117796	0.043591	0.030701	0.525057	5.15058e-34	1.61875e-33
MA0063.1	Nkx2-5	Homeo domain factors	NK	3105	38142	11514	110013	0.0752782	0.0947444	-0.362464	5.80199e-34	1.81352e-33
MA1120.1	SOX13	High-mobility group (HMG) domain factors	SOX-related factors	5607	35640	19501	102026	0.135937	0.160466	-0.280842	2.08828e-33	6.49183e-33
MA0624.1	NFATC1	Rel homology region (RHR) factors	NFAT-related factors	6905	34342	23568	97959	0.167406	0.193932	-0.258952	2.13427e-33	6.59892e-33
MA1421.1	TCF7L1	High-mobility group (HMG) domain factors	TCF-7-related factors	7054	34193	23992	97535	0.171018	0.197421	-0.253861	1.21099e-32	3.72412e-32
MA0863.1	MTF1	C2H2 zinc finger factors	More than 3 adjacent zinc fingers	7175	34072	18131	103396	0.173952	0.149193	0.26407	1.67117e-32	5.11182e-32
MA0600.2	RFX2	Fork headwinged helix factors	RFX-related factors	4949	36298	12037	109490	0.119984	0.0990479	0.310608	2.04371e-32	6.2181e-32
MA0621.1	mix-a	Homeo domain factors	Paired-related HD factors	2887	38360	10719	110808	0.069993	0.0882026	-0.362104	7.37024e-32	2.23057e-31
MA0480.1	Foxo1	Fork headwinged helix factors	FOX	9054	32193	30129	91398	0.219507	0.24792	-0.229058	7.98464e-32	2.4038e-31
MA0625.1	NFATC3	Rel homology region (RHR) factors	NFAT-related factors	6815	34432	23190	98337	0.165224	0.190822	-0.25277	1.47263e-31	4.41019e-31
MA0495.2	MAFF	Basic leucine zipper factors (bZIP)	Maf-related	5678	35569	19588	101939	0.137658	0.161182	-0.267533	1.08914e-30	3.24473e-30
MA0614.1	Foxj2	Fork headwinged helix factors	FOX	4114	37133	14633	106894	0.0997406	0.120409	-0.305173	1.14825e-30	3.4031e-30
MA0071.1	RORA	Nuclear receptors with C4 zinc fingers	Thyroid hormone receptor-related factors (NR1)	5055	36192	17623	103904	0.122554	0.145013	-0.280136	1.1923e-30	3.51545e-30
MA0103.3	ZEB1	Homeo domain factors	HD-ZF factors	16632	24615	45129	76398	0.403229	0.37135	0.193897	1.33691e-30	3.92161e-30
MA0779.1	PAX1	Paired box factors	Paired domain only	4884	36363	11941	109586	0.118409	0.098258	0.301773	2.01207e-30	5.87196e-30
MA0898.1	Hmx3	Homeo domain factors	NK	3449	37798	12474	109053	0.0836182	0.102644	-0.325994	4.06099e-30	1.17913e-29
MA0481.2	FOXP1	Fork headwinged helix factors	FOX	5927	35320	20339	101188	0.143695	0.167362	-0.260425	4.26906e-30	1.23329e-29
MA0660.1	MEF2B	MADS box factors	Regulators of differentiation	5854	35393	20107	101420	0.141925	0.165453	-0.261428	4.70256e-30	1.35169e-29
MA0839.1	CREB3L1	Basic leucine zipper factors (bZIP)	CREB-related factors	5497	35750	13636	107891	0.13327	0.112206	0.282906	8.36764e-30	2.38124e-29
MA0793.1	POU6F2	Homeo domain factors	POU domain factors	3624	37623	13021	108506	0.0878609	0.107145	-0.317066	9.34505e-30	2.64622e-29
MA0479.1	FOXH1	Fork headwinged helix factors	FOX	5485	35762	18920	102607	0.132979	0.155686	-0.265688	1.75917e-29	4.95688e-29
MA0594.1	Hoxa9	Homeo domain factors	HOX	3725	37522	13333	108194	0.0903096	0.109712	-0.311846	1.79337e-29	5.02847e-29
MA0622.1	Mlxip	Basic helix-loop-helix factors (bHLH)	bHLH-ZIP	5190	36057	12814	108713	0.125827	0.105442	0.288307	2.00863e-29	5.60457e-29
MA0897.1	Hmx2	Homeo domain factors	NK	3414	37833	12327	109200	0.0827697	0.101434	-0.323	2.6169e-29	7.26634e-29
MA0058.3	MAX	Basic helix-loop-helix factors (bHLH)	bHLH-ZIP	4995	36252	12297	109230	0.1211	0.101187	0.291533	4.27618e-29	1.18163e-28
MA1150.1	RORB	Nuclear receptors with C4 zinc fingers	Thyroid hormone receptor-related factors (NR1)	4480	36767	15718	105809	0.108614	0.129338	-0.285838	6.15851e-29	1.69359e-28
MA0077.1	SOX9	High-mobility group (HMG) domain factors	SOX-related factors	4043	37204	14302	107225	0.0980192	0.117686	-0.295578	2.12352e-28	5.81175e-28
MA0080.4	SPI1	Tryptophan cluster factors	Ets-related	9331	31916	30763	90764	0.226223	0.253137	-0.2133	2.85411e-28	7.77407e-28
MA0468.1	DUX4	Homeo domain factors	Paired-related HD factors	4147	37100	14622	106905	0.100541	0.120319	-0.291134	3.59857e-28	9.75536e-28
MA1103.1	FOXK2	Fork headwinged helix factors	FOX	5309	35938	18280	103247	0.128712	0.150419	-0.261208	8.13307e-28	2.19439e-27
MA0485.1	Hoxc9	Homeo domain factors	HOX	3716	37531	13211	108316	0.0900914	0.108708	-0.300798	2.13584e-27	5.73569e-27
MA0051.1	IRF2	Tryptophan cluster factors	Interferon-regulatory factors	6454	34793	21829	99698	0.156472	0.179623	-0.239244	2.85948e-27	7.6431e-27
MA0626.1	Npas2	Basic helix-loop-helix factors (bHLH)	PAS domain factors	4803	36444	11856	109671	0.116445	0.0975586	0.285867	3.50871e-27	9.3348e-27
MA0825.1	MNT	Basic helix-loop-helix factors (bHLH)	bHLH-ZIP	4848	36399	11992	109535	0.117536	0.0986777	0.28286	7.51921e-27	1.9912e-26
MA0670.1	NFIA	SMADNF-1 DNA-binding domain factors	Nuclear factor 1	7916	33331	26325	95202	0.191917	0.216619	-0.2195	8.86241e-27	2.33608e-26
MA1151.1	RORC	Nuclear receptors with C4 zinc fingers	Thyroid hormone receptor-related factors (NR1)	4395	36852	15340	106187	0.106553	0.126227	-0.276545	1.03311e-26	2.71072e-26
MA0508.2	PRDM1	C2H2 zinc finger factors	More than 3 adjacent zinc fingers	7584	33663	25297	96230	0.183868	0.20816	-0.222648	1.04656e-26	2.73349e-26
MA0035.3	Gata1	Other C4 zinc finger-type factors	C4-GATA-related	5087	36160	17508	104019	0.12333	0.144067	-0.258721	2.04714e-26	5.32257e-26
MA0870.1	Sox1	High-mobility group (HMG) domain factors	SOX-related factors	3459	37788	12341	109186	0.0838606	0.101549	-0.304218	2.12297e-26	5.49473e-26
MA0613.1	FOXG1	Fork headwinged helix factors	FOX	4406	36841	15358	106169	0.10682	0.126375	-0.274445	2.15143e-26	5.54332e-26
MA0693.2	VDR	Nuclear receptors with C4 zinc fingers	Thyroid hormone receptor-related factors (NR1)	5637	35610	19227	102300	0.136664	0.158212	-0.247709	2.70198e-26	6.93063e-26
MA0634.1	ALX3	Homeo domain factors	Paired-related HD factors	3158	38089	11346	110181	0.0765631	0.093362	-0.312645	8.81934e-26	2.25208e-25
MA1104.1	GATA6	Other C4 zinc finger-type factors	C4-GATA-related	4165	37082	14563	106964	0.100977	0.119833	-0.27756	9.75066e-26	2.47883e-25
MA0844.1	XBP1	Basic leucine zipper factors (bZIP)	XBP-1-related factors	3149	38098	7459	114068	0.0763449	0.0613773	0.338037	1.20452e-25	3.04861e-25
MA0893.1	GSX2	Homeo domain factors	HOX	3597	37650	12743	108784	0.0872063	0.104857	-0.294069	1.54666e-25	3.89731e-25
MA0640.1	ELF3	Tryptophan cluster factors	Ets-related	7721	33526	20021	101506	0.187189	0.164745	0.22353	2.91195e-25	7.30543e-25
MA0078.1	Sox17	High-mobility group (HMG) domain factors	SOX-related factors	4809	36438	16568	104959	0.11659	0.136332	-0.258256	3.63133e-25	9.0704e-25
MA0143.3	Sox2	High-mobility group (HMG) domain factors	SOX-related factors	7560	33687	25125	96402	0.183286	0.206744	-0.215828	4.13135e-25	1.02745e-24
MA0153.2	HNF1B	Homeo domain factors	POU domain factors	2500	38747	9186	112341	0.0606105	0.0755881	-0.341753	4.1626e-25	1.03074e-24
MA0702.1	LMX1A	Homeo domain factors	HD-LIM	2432	38815	8964	112563	0.0589619	0.0737614	-0.345925	4.24098e-25	1.04113e-24
MA0703.1	LMX1B	Homeo domain factors	HD-LIM	2432	38815	8964	112563	0.0589619	0.0737614	-0.345925	4.24098e-25	1.04113e-24
MA0809.1	TEAD4	TEA domain factors	TEF-1-related factors	6484	34763	21791	99736	0.157199	0.17931	-0.228243	5.62712e-25	1.37552e-24
MA0756.1	ONECUT2	Homeo domain factors	HD-CUT	2461	38786	9052	112475	0.0596649	0.0744855	-0.342968	6.27867e-25	1.52826e-24
MA0136.2	ELF5	Tryptophan cluster factors	Ets-related	9077	32170	23862	97665	0.220064	0.196351	0.207676	8.15338e-25	1.97616e-24
MA1117.1	RELB	Rel homology region (RHR) factors	NF-kappaB-related factors	9680	31567	25577	95950	0.234684	0.210464	0.202078	1.14566e-24	2.76506e-24
MA1110.1	NR1H4	Nuclear receptors with C4 zinc fingers	Thyroid hormone receptor-related factors (NR1)	4752	36495	16361	105166	0.115208	0.134629	-0.256733	1.19927e-24	2.88228e-24
MA0796.1	TGIF1	Homeo domain factors	TALE-type homeo domain factors	5886	35361	19897	101630	0.142701	0.163725	-0.234122	2.08718e-24	4.99526e-24
MA0857.1	Rarb	Nuclear receptors with C4 zinc fingers	Thyroid hormone receptor-related factors (NR1)	8021	33226	26497	95030	0.194463	0.218034	-0.207939	2.28845e-24	5.45414e-24
MA0154.3	EBF1	Rel homology region (RHR) factors	Early B-Cell Factor-related factors	11614	29633	31101	90426	0.281572	0.255918	0.188423	2.37174e-24	5.6292e-24
MA0116.1	Znf423	C2H2 zinc finger factors	Factors with multiple dispersed zinc fingers	10869	30378	28980	92547	0.26351	0.238466	0.192305	2.78224e-24	6.5762e-24
MA0036.3	GATA2	Other C4 zinc finger-type factors	C4-GATA-related	3654	37593	12839	108688	0.0885883	0.105647	-0.281305	9.91385e-24	2.33363e-23
MA0821.1	HES5	Basic helix-loop-helix factors (bHLH)	Hairy-related factors	6197	35050	15862	105665	0.150241	0.130522	0.236043	1.379e-23	3.23274e-23
MA1111.1	NR2F2	Nuclear receptors with C4 zinc fingers	RXR-related receptors (NR2)	6164	35083	20702	100825	0.149441	0.170349	-0.224848	2.15866e-23	5.03981e-23
MA0030.1	FOXF2	Fork headwinged helix factors	FOX	4654	36593	15985	105542	0.112832	0.131535	-0.251976	2.21615e-23	5.15301e-23
MA0117.2	Mafb	Basic leucine zipper factors (bZIP)	Maf-related	6172	35075	20665	100862	0.149635	0.170045	-0.219536	2.21423e-22	5.12769e-22
MA0766.1	GATA5	Other C4 zinc finger-type factors	C4-GATA-related	3299	37948	11636	109891	0.0799816	0.0957483	-0.284496	2.79733e-22	6.4519e-22
MA0912.1	Hoxd3	Homeo domain factors	HOX	3216	38031	11362	110165	0.0779693	0.0934936	-0.286438	4.27528e-22	9.82112e-22
MA0101.1	REL	Rel homology region (RHR) factors	NF-kappaB-related factors	9145	32102	24266	97261	0.221713	0.199676	0.191299	1.87801e-21	4.29688e-21
MA0884.1	DUXA	Homeo domain factors	Paired-related HD factors	3411	37836	11945	109582	0.0826969	0.0982909	-0.273941	2.55769e-21	5.82869e-21
MA0874.1	Arx	Homeo domain factors	Paired-related HD factors	1915	39332	7116	114411	0.0464276	0.0585549	-0.353246	3.20717e-21	7.27977e-21
MA1418.1	IRF3	Tryptophan cluster factors	Interferon-regulatory factors	9891	31356	31989	89538	0.239799	0.263225	-0.179668	3.51765e-21	7.95295e-21
MA0738.1	HIC2	C2H2 zinc finger factors	Factors with multiple dispersed zinc fingers	12886	28361	34977	86550	0.312411	0.287813	0.169014	3.79805e-21	8.5531e-21
MA0482.1	Gata4	Other C4 zinc finger-type factors	C4-GATA-related	4741	36506	16120	105407	0.114942	0.132645	-0.235805	6.61402e-21	1.48361e-20
MA0618.1	LBX1	Homeo domain factors	NK	3036	38211	10729	110798	0.0736054	0.0882849	-0.28538	6.88156e-21	1.5376e-20
MA0496.2	MAFK	Basic leucine zipper factors (bZIP)	Maf-related	5604	35643	18798	102729	0.135864	0.154682	-0.218919	1.1088e-20	2.46784e-20
MA0122.2	NKX3-2	Homeo domain factors	NK	4246	37001	14548	106979	0.102941	0.11971	-0.244935	1.36856e-20	3.03416e-20
MA0706.1	MEOX2	Homeo domain factors	HOX	2815	38432	10003	111524	0.0682474	0.0823109	-0.292231	1.64636e-20	3.63598e-20
MA0526.2	USF2	Basic helix-loop-helix factors (bHLH)	bHLH-ZIP	7362	33885	19295	102232	0.178486	0.158771	0.203048	1.69476e-20	3.72847e-20
MA0687.1	SPIC	Tryptophan cluster factors	Ets-related	9332	31915	30231	91296	0.226247	0.24876	-0.179488	2.14456e-20	4.69996e-20
MA1105.1	GRHL2	Grainyhead domain factors	Grainyhead-related factors	4724	36523	16033	105494	0.11453	0.13193	-0.232662	2.52771e-20	5.51851e-20
MA0729.1	RARA	Nuclear receptors with C4 zinc fingers	Thyroid hormone receptor-related factors (NR1)	6544	34703	21681	99846	0.158654	0.178405	-0.203566	2.93144e-20	6.37561e-20
MA0663.1	MLX	Basic helix-loop-helix factors (bHLH)	bHLH-ZIP	3311	37936	8104	113423	0.0802725	0.0666848	0.288749	3.22472e-20	6.98689e-20
MA0892.1	GSX1	Homeo domain factors	HOX	2989	38258	10545	110982	0.0724659	0.0867708	-0.282313	3.2583e-20	7.03302e-20
MA0070.1	PBX1	Homeo domain factors	TALE-type homeo domain factors	3273	37974	11449	110078	0.0793512	0.0942095	-0.271075	3.4673e-20	7.45599e-20
MA0124.2	Nkx3-1	Homeo domain factors	NK	4302	36945	14696	106831	0.104298	0.120928	-0.240447	4.34225e-20	9.3025e-20
MA0048.2	NHLH1	Basic helix-loop-helix factors (bHLH)	Tal-related	14144	27103	38692	82835	0.34291	0.318382	0.159936	5.21818e-20	1.11373e-19
MA0662.1	MIXL1	Homeo domain factors	Paired-related HD factors	2531	38716	9060	112467	0.061362	0.0745513	-0.301283	7.22968e-20	1.53732e-19
MA1140.1	JUNB	Basic leucine zipper factors (bZIP)	Jun-related	2111	39136	4917	116610	0.0511795	0.0404601	0.355276	9.58367e-20	2.03032e-19
MA0904.1	Hoxb5	Homeo domain factors	HOX	2726	38521	9659	111868	0.0660897	0.0794803	-0.286989	2.74439e-19	5.79259e-19
MA0834.1	ATF7	Basic leucine zipper factors (bZIP)	Jun-related	2797	38450	6758	114769	0.067811	0.055609	0.304994	2.79586e-19	5.87953e-19
MA0125.1	Nobox	Homeo domain factors	Paired-related HD factors	2721	38526	9641	111886	0.0659684	0.0793322	-0.286902	3.11008e-19	6.51635e-19
MA0907.1	HOXC13	Homeo domain factors	HOX	2967	38280	10415	111112	0.0719325	0.0857011	-0.274216	5.3612e-19	1.1192e-18
MA0752.1	ZNF410	C2H2 zinc finger factors	More than 3 adjacent zinc fingers	3619	37628	12482	109045	0.0877397	0.10271	-0.251124	5.67142e-19	1.17966e-18
MA0698.1	ZBTB18	C2H2 zinc finger factors	More than 3 adjacent zinc fingers	10484	30763	33611	87916	0.254176	0.276572	-0.165852	6.65506e-19	1.37924e-18
MA0679.1	ONECUT1	Homeo domain factors	HD-CUT	1935	39312	7081	114446	0.0469125	0.0582669	-0.329972	8.67153e-19	1.79066e-18
MA0664.1	MLXIPL	Basic helix-loop-helix factors (bHLH)	bHLH-ZIP	3315	37932	8181	113346	0.0803695	0.0673184	0.276025	1.09998e-18	2.26328e-18
MA0885.1	Dlx2	Homeo domain factors	NK	2958	38289	10367	111160	0.0717143	0.0853061	-0.271651	1.28166e-18	2.62764e-18
MA0718.1	RAX	Homeo domain factors	Paired-related HD factors	2587	38660	9181	112346	0.0627197	0.075547	-0.288318	1.28744e-18	2.63005e-18
MA0065.2	Pparg::Rxra	Nuclear receptors with C4 zinc fingers::Nuclear receptors with C4 zinc fingers	Thyroid hormone receptor-related factors (NR1)::RXR-related receptors (NR2)	19026	22221	53034	68493	0.46127	0.436397	0.145085	1.67464e-18	3.40887e-18
MA0704.1	Lhx4	Homeo domain factors	HD-LIM	1680	39567	6231	115296	0.0407302	0.0512726	-0.348007	2.0791e-18	4.2057e-18
MA0157.2	FOXO3	Fork headwinged helix factors	FOX	4412	36835	14943	106584	0.106965	0.12296	-0.227108	2.08079e-18	4.2057e-18
MA0800.1	EOMES	T-Box factors	TBrain-related factors	5730	35517	19040	102487	0.138919	0.156673	-0.203587	2.41664e-18	4.86732e-18
MA0852.2	FOXK1	Fork headwinged helix factors	FOX	5760	35487	19115	102412	0.139647	0.15729	-0.201561	4.50329e-18	9.03818e-18
MA0630.1	SHOX	Homeo domain factors	Paired-related HD factors	2583	38664	9139	112388	0.0626227	0.0752014	-0.283546	5.32352e-18	1.04283e-17
MA0654.1	ISX	Homeo domain factors	Paired-related HD factors	2583	38664	9139	112388	0.0626227	0.0752014	-0.283546	5.32352e-18	1.04283e-17
MA0701.1	LHX9	Homeo domain factors	HD-LIM	2583	38664	9139	112388	0.0626227	0.0752014	-0.283546	5.32352e-18	1.04283e-17
MA0716.1	PRRX1	Homeo domain factors	Paired-related HD factors	2583	38664	9139	112388	0.0626227	0.0752014	-0.283546	5.32352e-18	1.04283e-17
MA0717.1	RAX2	Homeo domain factors	Paired-related HD factors	2583	38664	9139	112388	0.0626227	0.0752014	-0.283546	5.32352e-18	1.04283e-17
MA0720.1	Shox2	Homeo domain factors	Paired-related HD factors	2583	38664	9139	112388	0.0626227	0.0752014	-0.283546	5.32352e-18	1.04283e-17
MA0721.1	UNCX	Homeo domain factors	Paired-related HD factors	2583	38664	9139	112388	0.0626227	0.0752014	-0.283546	5.32352e-18	1.04283e-17
MA0672.1	NKX2-3	Homeo domain factors	NK	5810	35437	19258	102269	0.140859	0.158467	-0.199826	6.57654e-18	1.28388e-17
MA0140.2	GATA1::TAL1	Other C4 zinc finger-type factors::Basic helix-loop-helix factors (bHLH)	C4-GATA-related::Tal-related	4462	36785	15066	106461	0.108178	0.123972	-0.222384	7.62061e-18	1.48265e-17
MA0896.1	Hmx1	Homeo domain factors	NK	3186	38061	11032	110495	0.077242	0.0907782	-0.254265	1.72883e-17	3.35217e-17
MA0725.1	VSX1	Homeo domain factors	Paired-related HD factors	2622	38625	9237	112290	0.0635683	0.0760078	-0.277117	1.8783e-17	3.61746e-17
MA0726.1	VSX2	Homeo domain factors	Paired-related HD factors	2622	38625	9237	112290	0.0635683	0.0760078	-0.277117	1.8783e-17	3.61746e-17
MA0090.2	TEAD1	TEA domain factors	TEF-1-related factors	6414	34833	21080	100447	0.155502	0.173459	-0.188691	2.54427e-17	4.88364e-17
MA0914.1	ISL2	Homeo domain factors	HD-LIM	3632	37615	12429	109098	0.0880549	0.102274	-0.238615	2.93012e-17	5.60545e-17
MA0141.3	ESRRB	Nuclear receptors with C4 zinc fingers	Steroid hormone receptors (NR3)	6047	35200	19934	101593	0.146605	0.164029	-0.191805	4.31974e-17	8.2363e-17
MA0854.1	Alx1	Homeo domain factors	Paired-related HD factors	2194	39053	7845	113682	0.0531917	0.0645536	-0.296693	4.35538e-17	8.27667e-17
MA0842.1	NRL	Basic leucine zipper factors (bZIP)	Maf-related	6933	34314	22656	98871	0.168085	0.186428	-0.181612	4.68457e-17	8.87277e-17
MA0652.1	IRF8	Tryptophan cluster factors	Interferon-regulatory factors	5084	36163	16952	104575	0.123257	0.139492	-0.205454	4.91576e-17	9.27991e-17
MA1119.1	SIX2	Homeo domain factors	HD-SINE	6479	34768	21253	100274	0.157078	0.174883	-0.185728	6.21858e-17	1.17007e-16
MA0830.1	TCF4	Basic helix-loop-helix factors (bHLH)	E2A	15117	26130	41782	79745	0.366499	0.343808	0.142973	8.05591e-17	1.51081e-16
MA0633.1	Twist2	Basic helix-loop-helix factors (bHLH)	Tal-related	4387	36860	14767	106760	0.106359	0.121512	-0.216813	8.54136e-17	1.59662e-16
MA0722.1	VAX1	Homeo domain factors	NK	2512	38735	8837	112690	0.0609014	0.0727164	-0.274054	1.7408e-16	3.24345e-16
MA0467.1	Crx	Homeo domain factors	Paired-related HD factors	5264	35983	17460	104067	0.127621	0.143672	-0.197684	2.60903e-16	4.84535e-16
MA1136.1	FOSB::JUNB	Basic leucine zipper factors (bZIP)::Basic leucine zipper factors (bZIP)	Fos-related::Jun-related	2594	38653	6354	115173	0.0628894	0.0522847	0.282706	7.91202e-16	1.46462e-15
MA1112.1	NR4A1	Nuclear receptors with C4 zinc fingers	NGFI-B-related receptors (NR4)	5386	35861	17792	103735	0.130579	0.146404	-0.191543	1.23978e-15	2.28165e-15
MA0797.1	TGIF2	Homeo domain factors	TALE-type homeo domain factors	5756	35491	18934	102593	0.13955	0.155801	-0.18645	1.24055e-15	2.28165e-15
MA0688.1	TBX2	T-Box factors	TBX2-related factors	5998	35249	19667	101860	0.145417	0.161832	-0.182307	1.82233e-15	3.34094e-15
MA0728.1	Nr2F6	Nuclear receptors with C4 zinc fingers	RXR-related receptors (NR2)	7939	33308	25594	95933	0.192475	0.210603	-0.162639	2.66703e-15	4.87393e-15
MA0808.1	TEAD3	TEA domain factors	TEF-1-related factors	5621	35626	18485	103042	0.136277	0.152106	-0.185242	3.51839e-15	6.4093e-15
MA0710.1	NOTO	Homeo domain factors	NK	2735	38512	9478	112049	0.0663079	0.0779909	-0.252278	3.64429e-15	6.61758e-15
MA0700.1	LHX2	Homeo domain factors	HD-LIM	2631	38616	9137	112390	0.0637865	0.0751849	-0.254853	5.50358e-15	9.96218e-15
MA0705.1	Lhx8	Homeo domain factors	HD-LIM	2434	38813	8507	113020	0.0590104	0.0700009	-0.263341	6.27376e-15	1.13205e-14
MA0802.1	TBR1	T-Box factors	TBrain-related factors	5920	35327	19382	102145	0.143526	0.159487	-0.179289	7.31999e-15	1.31668e-14
MA0025.1	NFIL3	Basic leucine zipper factors (bZIP)	CEBP-related	2521	38726	8780	112747	0.0611196	0.0722473	-0.258496	7.72488e-15	1.38515e-14
MA0894.1	HESX1	Homeo domain factors	Paired-related HD factors	2422	38825	8461	113066	0.0587194	0.0696224	-0.262508	9.23415e-15	1.6506e-14
MA0628.1	POU6F1	Homeo domain factors	POU domain factors	1431	39816	5263	116264	0.0346934	0.0433072	-0.332858	9.95637e-15	1.77416e-14
MA0031.1	FOXD1	Fork headwinged helix factors	FOX	3887	37360	13065	108462	0.0942372	0.107507	-0.211344	1.48606e-14	2.63166e-14
MA0042.2	FOXI1	Fork headwinged helix factors	FOX	3893	37354	13083	108444	0.0943826	0.107655	-0.211112	1.54258e-14	2.68194e-14
MA0033.2	FOXL1	Fork headwinged helix factors	FOX	3893	37354	13083	108444	0.0943826	0.107655	-0.211112	1.54258e-14	2.68194e-14
MA0847.1	FOXD2	Fork headwinged helix factors	FOX	3893	37354	13083	108444	0.0943826	0.107655	-0.211112	1.54258e-14	2.68194e-14
MA0848.1	FOXO4	Fork headwinged helix factors	FOX	3893	37354	13083	108444	0.0943826	0.107655	-0.211112	1.54258e-14	2.68194e-14
MA0849.1	FOXO6	Fork headwinged helix factors	FOX	3893	37354	13083	108444	0.0943826	0.107655	-0.211112	1.54258e-14	2.68194e-14
MA0850.1	FOXP3	Fork headwinged helix factors	FOX	3893	37354	13083	108444	0.0943826	0.107655	-0.211112	1.54258e-14	2.68194e-14
MA0723.1	VAX2	Homeo domain factors	NK	2228	39019	7826	113701	0.054016	0.0643972	-0.269515	1.83318e-14	3.17751e-14
MA0680.1	PAX7	Paired box factors	Paired plus homeo domain	1517	39730	5531	115996	0.0367784	0.0455125	-0.320527	2.02085e-14	3.49222e-14
MA0115.1	NR1H2::RXRA	Nuclear receptors with C4 zinc fingers::Nuclear receptors with C4 zinc fingers	Thyroid hormone receptor-related factors (NR1)::RXR-related receptors (NR2)	5557	35690	18228	103299	0.134725	0.149991	-0.180559	2.30599e-14	3.97208e-14
MA0699.1	LBX2	Homeo domain factors	NK	2618	38629	9062	112465	0.0634713	0.0745678	-0.249632	2.31242e-14	3.97208e-14
MA0859.1	Rarg	Nuclear receptors with C4 zinc fingers	Thyroid hormone receptor-related factors (NR1)	7788	33459	25050	96477	0.188814	0.206127	-0.157715	2.84335e-14	4.86945e-14
MA0782.1	PKNOX1	Homeo domain factors	TALE-type homeo domain factors	6593	34654	21401	100126	0.159842	0.176101	-0.167965	2.86054e-14	4.88427e-14
MA0002.2	Runx1	Runt domain factors	Runt-related factors	12610	28637	39603	81924	0.305719	0.325878	-0.134673	3.09667e-14	5.27171e-14
MA1121.1	TEAD2	TEA domain factors	TEF-1-related factors	8122	33125	26057	95470	0.196911	0.214413	-0.154657	3.53315e-14	5.99691e-14
MA0159.1	RARA::RXRA	Nuclear receptors with C4 zinc fingers::Nuclear receptors with C4 zinc fingers	Thyroid hormone receptor-related factors (NR1)::RXR-related receptors (NR2)	10514	30733	28740	92787	0.254903	0.236491	0.143378	5.45692e-14	9.23479e-14
MA0853.1	Alx4	Homeo domain factors	Paired-related HD factors	2062	39185	7268	114259	0.0499915	0.0598056	-0.273566	6.11839e-14	1.03236e-13
MA0881.1	Dlx4	Homeo domain factors	NK	2429	38818	8439	113088	0.0588891	0.0694414	-0.254049	6.24674e-14	1.05092e-13
MA0783.1	PKNOX2	Homeo domain factors	TALE-type homeo domain factors	7988	33259	25625	95902	0.193663	0.210858	-0.153849	6.87924e-14	1.15394e-13
MA0612.1	EMX1	Homeo domain factors	NK	2459	38788	8527	113000	0.0596165	0.0701655	-0.251313	8.3271e-14	1.39272e-13
MA0902.1	HOXB2	Homeo domain factors	HOX	2502	38745	8657	112870	0.060659	0.0712352	-0.248193	1.14817e-13	1.91473e-13
MA0877.1	Barhl1	Homeo domain factors	NK	3222	38025	10923	110604	0.0781148	0.0898813	-0.220946	1.39709e-13	2.32306e-13
MA0708.1	MSX2	Homeo domain factors	NK	3211	38036	10887	110640	0.0778481	0.089585	-0.221065	1.49599e-13	2.47314e-13
MA0709.1	Msx3	Homeo domain factors	NK	3211	38036	10887	110640	0.0778481	0.089585	-0.221065	1.49599e-13	2.47314e-13
MA0903.1	HOXB3	Homeo domain factors	HOX	3142	38105	10670	110857	0.0761752	0.0877994	-0.223147	1.52565e-13	2.5149e-13
MA0875.1	BARX1	Homeo domain factors	NK	3100	38147	10535	110992	0.075157	0.0866886	-0.224025	1.6232e-13	2.66802e-13
MA0678.1	OLIG2	Basic helix-loop-helix factors (bHLH)	Tal-related	2388	38859	8280	113247	0.0578951	0.068133	-0.250664	2.1768e-13	3.56771e-13
MA0644.1	ESX1	Homeo domain factors	Paired-related HD factors	2657	38590	9132	112395	0.0644168	0.0751438	-0.238842	2.21152e-13	3.61425e-13
MA0673.1	NKX2-8	Homeo domain factors	NK	5301	35946	17363	104164	0.128518	0.142874	-0.17674	2.36689e-13	3.85715e-13
MA0658.1	LHX6	Homeo domain factors	HD-LIM	1843	39404	6533	114994	0.044682	0.0537576	-0.280531	2.79901e-13	4.54839e-13
MA1139.1	FOSL2::JUNB	Basic leucine zipper factors (bZIP)::Basic leucine zipper factors (bZIP)	Fos-related::Jun-related	2587	38660	6450	115077	0.0627197	0.0530746	0.255616	2.97645e-13	4.82302e-13
MA0081.1	SPIB	Tryptophan cluster factors	Ets-related	10553	30694	33328	88199	0.255849	0.274244	-0.136302	2.98916e-13	4.82995e-13
MA0037.3	GATA3	Other C4 zinc finger-type factors	C4-GATA-related	2995	38252	10189	111338	0.0726113	0.0838415	-0.225035	3.05105e-13	4.91605e-13
MA0661.1	MEOX1	Homeo domain factors	HOX	2480	38767	8563	112964	0.0601256	0.0704617	-0.244802	3.13347e-13	5.03468e-13
MA0132.2	PDX1	Homeo domain factors	HOX	2290	38957	7958	113569	0.0555192	0.0654834	-0.253431	3.42385e-13	5.48584e-13
MA0616.1	Hes2	Basic helix-loop-helix factors (bHLH)	Hairy-related factors	5074	36173	13342	108185	0.123015	0.109786	0.185715	3.60392e-13	5.75822e-13
MA0905.1	HOXC10	Homeo domain factors	HOX	2357	38890	8169	113358	0.0571435	0.0672196	-0.249781	3.66479e-13	5.83917e-13
MA0631.1	Six3	Homeo domain factors	HD-SINE	2479	38768	8554	112973	0.0601013	0.0703877	-0.243789	3.94282e-13	6.26471e-13
MA0780.1	PAX3	Paired box factors	Paired plus homeo domain	1402	39845	5100	116427	0.0339904	0.041966	-0.316039	4.12649e-13	6.53838e-13
MA0059.1	MAX::MYC	Basic helix-loop-helix factors (bHLH)::Basic helix-loop-helix factors (bHLH)	bHLH-ZIP::bHLH-ZIP	6245	35002	16642	104885	0.151405	0.136941	0.169228	4.25421e-13	6.72213e-13
MA0690.1	TBX21	T-Box factors	TBrain-related factors	6047	35200	19634	101893	0.146605	0.161561	-0.165669	4.51507e-13	7.11465e-13
MA1147.1	NR4A2::RXRA	Nuclear receptors with C4 zinc fingers::Nuclear receptors with C4 zinc fingers	NGFI-B-related receptors (NR4)::RXR-related receptors (NR2)	5836	35411	15503	106024	0.141489	0.127568	0.172609	6.68764e-13	1.05091e-12
MA1143.1	FOSL1::JUND	Basic leucine zipper factors (bZIP)::Basic leucine zipper factors (bZIP)	Fos-related::Jun-related	3119	38128	7926	113601	0.0756176	0.0652201	0.229505	7.26292e-13	1.13819e-12
MA0682.1	Pitx1	Homeo domain factors	Paired-related HD factors	4075	37172	13531	107996	0.0987951	0.111342	-0.192698	9.39586e-13	1.46842e-12
MA1118.1	SIX1	Homeo domain factors	HD-SINE	4898	36349	16068	105459	0.118748	0.132218	-0.177222	1.21531e-12	1.89416e-12
MA0463.1	Bcl6	C2H2 zinc finger factors	More than 3 adjacent zinc fingers	10664	30583	33596	87931	0.25854	0.276449	-0.131924	1.4107e-12	2.19272e-12
MA1129.1	FOSL1::JUN	Basic leucine zipper factors (bZIP)::Basic leucine zipper factors (bZIP)	Fos-related::Jun-related	2309	38938	5729	115798	0.0559798	0.0471418	0.261395	1.59633e-12	2.47453e-12
MA1133.1	JUN::JUNB	Basic leucine zipper factors (bZIP)::Basic leucine zipper factors (bZIP)	Jun-related::Jun-related	3889	37358	10076	111451	0.0942856	0.0829116	0.203441	1.63389e-12	2.5259e-12
MA0890.1	GBX2	Homeo domain factors	HOX	2734	38513	9321	112206	0.0662836	0.076699	-0.226729	1.75258e-12	2.7021e-12
MA0817.1	BHLHE23	Basic helix-loop-helix factors (bHLH)	Tal-related	2170	39077	7534	113993	0.0526099	0.0619945	-0.251156	2.05097e-12	3.15364e-12
MA0592.2	Esrra	Nuclear receptors with C4 zinc fingers	Steroid hormone receptors (NR3)	6023	35224	19504	102023	0.146023	0.160491	-0.160966	2.19294e-12	3.3629e-12
MA0501.1	MAF::NFE2	Basic leucine zipper factors (bZIP)::Basic leucine zipper factors (bZIP)	Maf-related::Jun-related	7768	33479	24804	96723	0.188329	0.204103	-0.144372	3.7976e-12	5.80809e-12
MA0605.1	Atf3	Basic leucine zipper factors (bZIP)	Fos-related	2900	38347	7373	114154	0.0703081	0.0606696	0.227559	5.9501e-12	9.07588e-12
MA1145.1	FOSL2::JUND	Basic leucine zipper factors (bZIP)::Basic leucine zipper factors (bZIP)	Fos-related::Jun-related	3750	37497	9725	111802	0.0909157	0.0800234	0.201264	6.51087e-12	9.90483e-12
MA0158.1	HOXA5	Homeo domain factors	HOX	2638	38609	8983	112544	0.0639562	0.0739177	-0.224263	7.26563e-12	1.10237e-11
MA0666.1	MSX1	Homeo domain factors	NK	2998	38249	10107	111420	0.0726841	0.0831667	-0.210759	9.13681e-12	1.38261e-11
MA0762.1	ETV2	Tryptophan cluster factors	Ets-related	5783	35464	15445	106082	0.140204	0.127091	0.163488	1.14667e-11	1.73059e-11
MA1123.1	TWIST1	Basic helix-loop-helix factors (bHLH)	Tal-related	10617	30630	33359	88168	0.257401	0.274499	-0.126413	1.23214e-11	1.8547e-11
MA0469.2	E2F3	Fork headwinged helix factors	E2F	1508	39739	3612	117915	0.0365602	0.0297218	0.308985	1.34294e-11	2.01617e-11
MA0882.1	DLX6	Homeo domain factors	NK	2360	38887	8086	113441	0.0572163	0.0665367	-0.232047	1.52156e-11	2.27836e-11
MA0083.3	SRF	MADS box factors	Responders to external signals (SRFRLM1)	2368	38879	8111	113416	0.0574102	0.0667424	-0.23164	1.6254e-11	2.42748e-11
MA0865.1	E2F8	Fork headwinged helix factors	E2F	7111	34136	19230	102297	0.1724	0.158236	0.148153	1.96737e-11	2.93056e-11
MA0160.1	NR4A2	Nuclear receptors with C4 zinc fingers	NGFI-B-related receptors (NR4)	6963	34284	22290	99237	0.168812	0.183416	-0.145287	2.05709e-11	3.05624e-11
MA0895.1	HMBOX1	Homeo domain factors	POU domain factors	2060	39187	7128	114399	0.049943	0.0586536	-0.245215	2.16262e-11	3.20471e-11
MA0164.1	Nr2e3	Nuclear receptors with C4 zinc fingers	RXR-related receptors (NR2)	3236	38011	10824	110703	0.0784542	0.0890666	-0.199736	2.29792e-11	3.39641e-11
MA0669.1	NEUROG2	Basic helix-loop-helix factors (bHLH)	Tal-related	4626	36621	15128	106399	0.112154	0.124483	-0.170635	2.60132e-11	3.83493e-11
MA0068.2	PAX4	Paired box factors	Paired plus homeo domain	1383	39864	4951	116576	0.0335297	0.0407399	-0.291793	3.26369e-11	4.79905e-11
MA0770.1	HSF2	Heat shock factors	HSF factors	5285	35962	17135	104392	0.128131	0.140997	-0.159516	4.3875e-11	6.435e-11
MA0498.2	MEIS1	Homeo domain factors	TALE-type homeo domain factors	3499	37748	11620	109907	0.0848304	0.0956166	-0.189777	5.08192e-11	7.43442e-11
MA0827.1	OLIG3	Basic helix-loop-helix factors (bHLH)	Tal-related	2901	38346	9754	111773	0.0703324	0.080262	-0.206012	5.13184e-11	7.48829e-11
MA0831.2	TFE3	Basic helix-loop-helix factors (bHLH)	bHLH-ZIP	4069	37178	10673	110854	0.0986496	0.0878241	0.184899	5.23868e-11	7.62475e-11
MA0144.2	STAT3	STAT domain factors	STAT factors	11992	29255	37413	84114	0.290736	0.307858	-0.117831	5.73124e-11	8.32048e-11
MA0522.2	TCF3	Basic helix-loop-helix factors (bHLH)	E2A	14770	26477	41357	80170	0.358087	0.340311	0.112859	5.89369e-11	8.53466e-11
MA0161.2	NFIC	SMADNF-1 DNA-binding domain factors	Nuclear factor 1	10569	30678	33122	88405	0.256237	0.272548	-0.121048	9.46658e-11	1.3674e-10
MA0656.1	JDP2	Basic leucine zipper factors (bZIP)	Fos-related	3239	38008	8382	113145	0.0785269	0.0689723	0.202024	1.09526e-10	1.57806e-10
MA0647.1	GRHL1	Grainyhead domain factors	Grainyhead-related factors	2292	38955	7821	113706	0.0555677	0.0643561	-0.225309	1.13925e-10	1.63731e-10
MA1127.1	FOSB::JUN	Basic leucine zipper factors (bZIP)::Basic leucine zipper factors (bZIP)	Fos-related::Jun-related	3423	37824	8896	112631	0.0829879	0.0732018	0.196309	1.24978e-10	1.79166e-10
MA1419.1	IRF4	Tryptophan cluster factors	Interferon-regulatory factors	4300	36947	14066	107461	0.10425	0.115744	-0.169513	1.42447e-10	2.03699e-10
MA0075.2	Prrx2	Homeo domain factors	Paired-related HD factors	2217	39030	7567	113960	0.0537494	0.062266	-0.225232	2.24141e-10	3.19723e-10
MA0643.1	Esrrg	Nuclear receptors with C4 zinc fingers	Steroid hormone receptors (NR3)	5937	35310	19064	102463	0.143938	0.15687	-0.146102	2.57016e-10	3.65704e-10
MA0880.1	Dlx3	Homeo domain factors	NK	1822	39425	6301	115226	0.0441729	0.0518486	-0.242764	3.91974e-10	5.5635e-10
MA0518.1	Stat4	STAT domain factors	STAT factors	10542	30705	32969	88558	0.255582	0.27129	-0.116832	4.22762e-10	5.98563e-10
MA0876.1	BSX	Homeo domain factors	NK	3061	38186	10192	111335	0.0742115	0.0838661	-0.191564	4.31045e-10	6.08785e-10
MA0731.1	BCL6B	C2H2 zinc finger factors	More than 3 adjacent zinc fingers	6195	35052	19797	101730	0.150193	0.162902	-0.13894	9.69123e-10	1.36537e-09
MA0818.1	BHLHE22	Basic helix-loop-helix factors (bHLH)	Tal-related	2016	39231	6883	114644	0.0488763	0.0566376	-0.224439	1.50946e-09	2.1214e-09
MA0879.1	Dlx1	Homeo domain factors	NK	2398	38849	8082	113445	0.0581376	0.0665037	-0.206829	1.55757e-09	2.18366e-09
MA0499.1	Myod1	Basic helix-loop-helix factors (bHLH)	MyoDASC-related factors	18286	22961	51825	69702	0.443329	0.426448	0.0991046	2.33089e-09	3.25982e-09
MA0519.1	Stat5a::Stat5b	STAT domain factors::STAT domain factors	STAT factors::STAT factors	9699	31548	30352	91175	0.235144	0.249755	-0.11481	2.4114e-09	3.36419e-09
MA0689.1	TBX20	T-Box factors	TBX1-related factors	6137	35110	19579	101948	0.148787	0.161108	-0.135832	2.62637e-09	3.6552e-09
MA0886.1	EMX2	Homeo domain factors	NK	1900	39347	6496	115031	0.046064	0.0534531	-0.225847	3.31418e-09	4.60124e-09
MA0100.3	MYB	Tryptophan cluster factors	MybSANT domain factors	6079	35168	19354	102173	0.14738	0.159257	-0.132056	8.38619e-09	1.16148e-08
MA0462.1	BATF::JUN	Basic leucine zipper factors (bZIP)::Basic leucine zipper factors (bZIP)	B-ATF-related factors::Jun-related	6870	34377	21751	99776	0.166558	0.178981	-0.125461	8.99238e-09	1.24243e-08
MA0667.1	MYF6	Basic helix-loop-helix factors (bHLH)	MyoDASC-related factors	5652	35595	18045	103482	0.137028	0.148486	-0.135141	1.0142e-08	1.39789e-08
MA0659.1	MAFG	Basic leucine zipper factors (bZIP)	Maf-related	4161	37086	13482	108045	0.10088	0.110938	-0.153341	1.12418e-08	1.54575e-08
MA0651.1	HOXC11	Homeo domain factors	HOX	1581	39666	5451	116076	0.0383301	0.0448542	-0.23658	1.25527e-08	1.72185e-08
MA0840.1	Creb5	Basic leucine zipper factors (bZIP)	CREB-related factors	2764	38483	7191	114336	0.0670109	0.059172	0.191527	1.305e-08	1.78579e-08
MA0258.2	ESR2	Nuclear receptors with C4 zinc fingers	Steroid hormone receptors (NR3)	12764	28483	35802	85725	0.309453	0.294601	0.101653	1.35011e-08	1.84311e-08
MA0889.1	GBX1	Homeo domain factors	HOX	2297	38950	7701	113826	0.0556889	0.0633686	-0.198153	1.49717e-08	2.039e-08
MA0906.1	HOXC12	Homeo domain factors	HOX	1968	39279	6669	114858	0.0477126	0.0548767	-0.212712	1.52881e-08	2.07714e-08
MA0108.2	TBP	TATA-binding proteins	TBP-related factors	3091	38156	10171	111356	0.0749388	0.0836933	-0.173113	1.54419e-08	2.09308e-08
MA0027.2	EN1	Homeo domain factors	NK	2595	38652	8628	112899	0.0629137	0.0709966	-0.186868	1.74527e-08	2.36003e-08
MA0607.1	Bhlha15	Basic helix-loop-helix factors (bHLH)	Tal-related	5859	35388	18652	102875	0.142047	0.15348	-0.131052	1.77018e-08	2.38808e-08
MA0500.1	Myog	Basic helix-loop-helix factors (bHLH)	MyoDASC-related factors	18095	23152	51386	70141	0.438699	0.422836	0.0933336	1.88349e-08	2.53496e-08
MA0724.1	VENTX	Homeo domain factors	NK	1963	39284	6647	114880	0.0475913	0.0546957	-0.211522	1.95665e-08	2.62724e-08
MA0691.1	TFAP4	Basic helix-loop-helix factors (bHLH)	bHLH-ZIP	8725	32522	27315	94212	0.211531	0.224765	-0.111984	2.05902e-08	2.75821e-08
MA0749.1	ZBED1	C2H2 zinc finger factors	BED zinc finger factors	835	40412	1949	119578	0.0202439	0.0160376	0.342217	2.30028e-08	3.07421e-08
MA0069.1	PAX6	Paired box factors	Paired plus homeo domain	3092	38155	10160	111367	0.074963	0.0836028	-0.170905	2.33095e-08	3.10793e-08
MA0883.1	Dmbx1	Homeo domain factors	Paired-related HD factors	2858	38389	9434	112093	0.0692899	0.0776288	-0.176927	2.45639e-08	3.26757e-08
MA0665.1	MSC	Basic helix-loop-helix factors (bHLH)	Tal-related	10354	30893	32191	89336	0.251024	0.264888	-0.104522	2.83936e-08	3.76825e-08
MA0486.2	HSF1	Heat shock factors	HSF factors	4883	36364	15650	105877	0.118384	0.128778	-0.138512	3.41421e-08	4.52067e-08
MA0911.1	Hoxa11	Homeo domain factors	HOX	1676	39571	5727	115800	0.0406333	0.0471253	-0.22363	3.52371e-08	4.65488e-08
MA0092.1	Hand1::Tcf3	Basic helix-loop-helix factors (bHLH)::Basic helix-loop-helix factors (bHLH)	Tal-related::E2A	8383	32864	26255	95272	0.203239	0.216043	-0.111521	3.65317e-08	4.81478e-08
MA0755.1	CUX2	Homeo domain factors	HD-CUT	987	40260	3524	118003	0.023929	0.0289977	-0.284676	4.05797e-08	5.336e-08
MA0743.1	SCRT1	C2H2 zinc finger factors	More than 3 adjacent zinc fingers	5686	35561	18089	103438	0.137852	0.148848	-0.129236	4.09856e-08	5.37702e-08
MA0494.1	Nr1h3::Rxra	Nuclear receptors with C4 zinc fingers::Nuclear receptors with C4 zinc fingers	Thyroid hormone receptor-related factors (NR1)::RXR-related receptors (NR2)	8349	32898	26139	95388	0.202415	0.215088	-0.110732	4.76726e-08	6.23999e-08
MA0908.1	HOXD11	Homeo domain factors	HOX	1748	39499	5937	115590	0.0423788	0.0488533	-0.214893	6.57698e-08	8.58912e-08
MA0137.3	STAT1	STAT domain factors	STAT factors	9195	32052	28656	92871	0.222925	0.235799	-0.105114	8.22184e-08	1.07127e-07
MA0843.1	TEF	Basic leucine zipper factors (bZIP)	CEBP-related	1566	39681	5355	116172	0.0379664	0.0440643	-0.224053	8.6063e-08	1.11882e-07
MA0826.1	OLIG1	Basic helix-loop-helix factors (bHLH)	Tal-related	2312	38935	7696	113831	0.0560526	0.0633275	-0.187208	8.75539e-08	1.13562e-07
MA0107.1	RELA	Rel homology region (RHR) factors	NF-kappaB-related factors	9871	31376	27520	94007	0.239314	0.226452	0.103891	9.06124e-08	1.17263e-07
MA0019.1	Ddit3::Cebpa	Basic leucine zipper factors (bZIP)::Basic leucine zipper factors (bZIP)	CEBP-related::CEBP-related	4781	36466	15281	106246	0.115911	0.125742	-0.133566	1.36063e-07	1.75684e-07
MA0629.1	Rhox11	Homeo domain factors	Paired-related HD factors	3561	37686	11541	109986	0.0863336	0.0949666	-0.15119	1.48202e-07	1.90927e-07
MA1131.1	FOSL2::JUN	Basic leucine zipper factors (bZIP)::Basic leucine zipper factors (bZIP)	Fos-related::Jun-related	3885	37362	10415	111112	0.0941887	0.0857011	0.149682	1.74464e-07	2.24255e-07
MA1114.1	PBX3	Homeo domain factors	TALE-type homeo domain factors	14000	27247	39557	81970	0.339419	0.3255	0.0904907	2.16069e-07	2.77111e-07
MA0038.1	Gfi1	C2H2 zinc finger factors	More than 3 adjacent zinc fingers	7462	33785	23361	98166	0.18091	0.192229	-0.107636	3.70258e-07	4.7274e-07
MA0668.1	NEUROD2	Basic helix-loop-helix factors (bHLH)	Tal-related	2773	38474	9074	112453	0.0672291	0.0746665	-0.16292	4.2569e-07	5.42305e-07
MA0591.1	Bach1::Mafk	Basic leucine zipper factors (bZIP)::Basic leucine zipper factors (bZIP)	Jun-related::Maf-related	10893	30354	30566	90961	0.264092	0.251516	0.0948323	4.44647e-07	5.65196e-07
MA0461.2	Atoh1	Basic helix-loop-helix factors (bHLH)	Tal-related	3996	37251	12829	108698	0.0968798	0.105565	-0.137802	4.99391e-07	6.33374e-07
MA0900.1	HOXA2	Homeo domain factors	HOX	2576	38671	8452	113075	0.062453	0.0695483	-0.1662	6.06291e-07	7.67253e-07
MA0754.1	CUX1	Homeo domain factors	HD-CUT	1106	40141	3838	117689	0.0268141	0.0315815	-0.243164	8.79755e-07	1.11086e-06
MA0745.1	SNAI2	C2H2 zinc finger factors	More than 3 adjacent zinc fingers	12958	28289	36675	84852	0.314156	0.301785	0.083752	2.55378e-06	3.21754e-06
MA0887.1	EVX1	Homeo domain factors	HOX	2245	39002	7372	114155	0.0544282	0.0606614	-0.165962	3.07785e-06	3.8693e-06
MA0017.2	NR2F1	Nuclear receptors with C4 zinc fingers	RXR-related receptors (NR2)	9754	31493	30109	91418	0.236478	0.247756	-0.0886915	3.99509e-06	5.01138e-06
MA0150.2	Nfe2l2	Basic leucine zipper factors (bZIP)	Jun-related	8939	32308	27645	93882	0.216719	0.22748	-0.0898845	5.82807e-06	7.29465e-06
MA0596.1	SREBF2	Basic helix-loop-helix factors (bHLH)	bHLH-ZIP	8128	33119	25194	96333	0.197057	0.207312	-0.0917442	7.81941e-06	9.76572e-06
MA0805.1	TBX1	T-Box factors	TBX1-related factors	6111	35136	19084	102443	0.148156	0.157035	-0.0990891	1.58122e-05	1.96622e-05
MA0806.1	TBX4	T-Box factors	TBX2-related factors	6111	35136	19084	102443	0.148156	0.157035	-0.0990891	1.58122e-05	1.96622e-05
MA0018.3	CREB1	Basic leucine zipper factors (bZIP)	CREB-related factors	4888	36359	13453	108074	0.118506	0.1107	0.111018	1.65025e-05	2.0476e-05
MA0521.1	Tcf12	Basic helix-loop-helix factors (bHLH)	E2A	17648	23599	50531	70996	0.427861	0.415801	0.0713122	1.82613e-05	2.26092e-05
MA0888.1	EVX2	Homeo domain factors	HOX	2248	38999	7315	114212	0.0545009	0.0601924	-0.152007	1.99259e-05	2.46168e-05
MA1153.1	Smad4	SMADNF-1 DNA-binding domain factors	SMAD factors	5275	35972	16545	104982	0.127888	0.136143	-0.103961	1.99704e-05	2.46187e-05
MA0758.1	E2F7	Fork headwinged helix factors	E2F	4918	36329	13556	107971	0.119233	0.111547	0.108657	2.32534e-05	2.86042e-05
MA0744.1	SCRT2	C2H2 zinc finger factors	More than 3 adjacent zinc fingers	5746	35501	17960	103567	0.139307	0.147786	-0.0995296	2.39194e-05	2.93603e-05
MA0112.3	ESR1	Nuclear receptors with C4 zinc fingers	Steroid hormone receptors (NR3)	7716	33531	21610	99917	0.187068	0.177821	0.0894578	2.54179e-05	3.11328e-05
MA0478.1	FOSL2	Basic leucine zipper factors (bZIP)	Fos-related	10014	31233	30737	90790	0.242781	0.252923	-0.0785037	3.94413e-05	4.8206e-05
MA0623.1	Neurog1	Basic helix-loop-helix factors (bHLH)	Tal-related	3342	37905	10640	110887	0.0810241	0.0875526	-0.122082	4.16365e-05	5.07805e-05
MA0804.1	TBX19	T-Box factors	Brachyury-related factors	2446	38801	7892	113635	0.0593013	0.0649403	-0.139722	4.54589e-05	5.53245e-05
MA0816.1	Ascl2	Basic helix-loop-helix factors (bHLH)	MyoDASC-related factors	15796	25451	45181	76346	0.382961	0.371777	0.0686471	5.12121e-05	6.21939e-05
MA0009.2	TBXT	T-Box factors	Brachyury-related factors	2787	38460	8932	112595	0.0675686	0.0734981	-0.130555	5.21478e-05	6.31961e-05
MA0488.1	JUN	Basic leucine zipper factors (bZIP)	Jun-related	6714	34533	20826	100701	0.162775	0.171369	-0.0891159	5.62596e-05	6.80349e-05
MA1126.1	FOS::JUN	Basic leucine zipper factors (bZIP)::Basic leucine zipper factors (bZIP)	Fos-related::Jun-related	3837	37410	10520	111007	0.0930249	0.0865651	0.114064	6.92329e-05	8.35469e-05
MA1113.1	PBX2	Homeo domain factors	TALE-type homeo domain factors	6798	34449	21063	100464	0.164812	0.17332	-0.087389	7.13939e-05	8.59733e-05
MA0091.1	TAL1::TCF3	Basic helix-loop-helix factors (bHLH)::Basic helix-loop-helix factors (bHLH)	Tal-related::E2A	7741	33506	23893	97634	0.187674	0.196607	-0.0830375	7.25777e-05	8.72152e-05
MA0719.1	RHOXF1	Homeo domain factors	Paired-related HD factors	4614	36633	14452	107075	0.111863	0.11892	-0.0997714	0.000111901	0.000134188
MA1116.1	RBPJ	Rel homology region (RHR) factors	CSL-related factors	16261	24986	46622	74905	0.394235	0.383635	0.0643101	0.000135973	0.000162712
MA0043.2	HLF	Basic leucine zipper factors (bZIP)	CEBP-related	1965	39282	6365	115162	0.0476398	0.0523752	-0.143904	0.000151224	0.000180585
MA0828.1	SREBF2	Basic helix-loop-helix factors (bHLH)	bHLH-ZIP	3743	37504	10318	111209	0.090746	0.0849029	0.105269	0.000282134	0.000336209
MA0833.1	ATF4	Basic leucine zipper factors (bZIP)	ATF-4-related factors	4101	37146	12849	108678	0.0994254	0.10573	-0.0988255	0.000284469	0.000338287
MA0684.1	RUNX3	Runt domain factors	Runt-related factors	4866	36381	15153	106374	0.117972	0.124688	-0.0909101	0.000328289	0.000389588
MA0712.1	OTX2	Homeo domain factors	Paired-related HD factors	2812	38435	8924	112603	0.0681747	0.0734322	-0.115339	0.000343164	0.000406397
MA0639.1	DBP	Basic leucine zipper factors (bZIP)	CEBP-related	1583	39664	5153	116374	0.0383785	0.0424021	-0.149882	0.000367343	0.000434133
MA0113.3	NR3C1	Nuclear receptors with C4 zinc fingers	Steroid hormone receptors (NR3)	3821	37426	11985	109542	0.092637	0.0986201	-0.0998347	0.000383785	0.000452629
MA0671.1	NFIX	SMADNF-1 DNA-binding domain factors	Nuclear factor 1	10225	31022	31188	90339	0.247897	0.256634	-0.066839	0.000432118	0.000508583
MA0829.1	Srebf1	Basic helix-loop-helix factors (bHLH)	bHLH-ZIP	3858	37389	10670	110857	0.0935341	0.0877994	0.100386	0.000451463	0.00053026
MA0873.1	HOXD12	Homeo domain factors	HOX	1573	39674	5106	116421	0.0381361	0.0420154	-0.145587	0.000565416	0.000662742
MA0484.1	HNF4G	Nuclear receptors with C4 zinc fingers	RXR-related receptors (NR2)	11965	29282	36341	85186	0.290082	0.299036	-0.0621827	0.000575706	0.000673423
MA0525.2	TP63	p53 domain factors	p53-related factors	2506	38741	7956	113571	0.0607559	0.0654669	-0.114994	0.000721787	0.000842576
MA0635.1	BARHL2	Homeo domain factors	NK	1670	39577	5392	116135	0.0404878	0.0443687	-0.137901	0.000788042	0.000918045
MA0106.3	TP53	p53 domain factors	p53-related factors	4079	37168	12721	108806	0.098892	0.104676	-0.0912981	0.00082713	0.000961622
MA0841.1	NFE2	Basic leucine zipper factors (bZIP)	Jun-related	6013	35234	18538	102989	0.14578	0.152542	-0.0768818	0.000900181	0.00104443
MA0771.1	HSF4	Heat shock factors	HSF factors	5353	35894	16540	104987	0.129779	0.136101	-0.0791464	0.00112614	0.00130396
MA0837.1	CEBPE	Basic leucine zipper factors (bZIP)	CEBP-related	1880	39367	6013	115514	0.0455791	0.0494787	-0.124341	0.00138856	0.00160456
MA0492.1	JUND	Basic leucine zipper factors (bZIP)	Jun-related	5747	35500	17697	103830	0.139331	0.145622	-0.0742942	0.0016406	0.00189198
MA0692.1	TFEB	Basic helix-loop-helix factors (bHLH)	bHLH-ZIP	5248	35999	14752	106775	0.127233	0.121389	0.0774784	0.00183415	0.00211093
MA0807.1	TBX5	T-Box factors	TBX2-related factors	7893	33354	24110	97417	0.191359	0.198392	-0.0646757	0.00190738	0.0021908
MA1155.1	ZSCAN4	C2H2 zinc finger factors	More than 3 adjacent zinc fingers	9835	31412	29883	91644	0.238442	0.245896	-0.0586077	0.0023267	0.00265643
MA0858.1	Rarb	Nuclear receptors with C4 zinc fingers	Thyroid hormone receptor-related factors (NR1)	6066	35181	18616	102911	0.147065	0.153184	-0.0691995	0.00274472	0.00312745
MA0838.1	CEBPG	Basic leucine zipper factors (bZIP)	CEBP-related	1823	39424	5808	115719	0.0441972	0.0477918	-0.118245	0.00276662	0.00314614
MA1146.1	NR1H4::RXRA	Nuclear receptors with C4 zinc fingers::Nuclear receptors with C4 zinc fingers	Thyroid hormone receptor-related factors (NR1)::RXR-related receptors (NR2)	5189	36058	14614	106913	0.125803	0.120253	0.0742272	0.00295638	0.00335525
MA0801.1	MGA	T-Box factors	TBX6-related factors	7216	34031	22035	99492	0.174946	0.181318	-0.0627974	0.00354014	0.00400983
MA0836.1	CEBPD	Basic leucine zipper factors (bZIP)	CEBP-related	1801	39446	5727	115800	0.0436638	0.0471253	-0.115295	0.00369293	0.00417462
MA0795.1	SMAD3	SMADNF-1 DNA-binding domain factors	SMAD factors	2215	39032	6988	114539	0.0537009	0.0575016	-0.104462	0.00388918	0.00438779
MA0119.1	NFIC::TLX1	SMADNF-1 DNA-binding domain factors::Homeo domain factors	Nuclear factor 1::NK	11629	29618	35167	86360	0.281936	0.289376	-0.0526111	0.00393508	0.00443083
MA1109.1	NEUROD1	Basic helix-loop-helix factors (bHLH)	Tal-related	16043	25204	46310	75217	0.388949	0.381068	0.048058	0.00447472	0.00502857
MA0466.2	CEBPB	Basic leucine zipper factors (bZIP)	CEBP-related	1819	39428	5767	115760	0.0441002	0.0474545	-0.110829	0.00513923	0.005764
MA0655.1	JDP2	Basic leucine zipper factors (bZIP)	Fos-related	5573	35674	17085	104442	0.135113	0.140586	-0.0664492	0.00553775	0.00619881
MA0512.2	Rxra	Nuclear receptors with C4 zinc fingers	RXR-related receptors (NR2)	6781	34466	20662	100865	0.1644	0.17002	-0.0582322	0.00845853	0.00944976
MA0714.1	PITX3	Homeo domain factors	Paired-related HD factors	3562	37685	11011	110516	0.0863578	0.0906054	-0.0759922	0.00893112	0.00995828
MA1132.1	JUN::JUNB	Basic leucine zipper factors (bZIP)::Basic leucine zipper factors (bZIP)	Jun-related::Jun-related	6150	35097	17491	104036	0.149102	0.143927	0.0597076	0.010124	0.0112664
MA0891.1	GSC2	Homeo domain factors	Paired-related HD factors	3295	37952	10191	111336	0.0798846	0.0838579	-0.076272	0.0113288	0.0125826
MA0856.1	RXRG	Nuclear receptors with C4 zinc fingers	RXR-related receptors (NR2)	6592	34655	20063	101464	0.159818	0.165091	-0.0559186	0.0123371	0.013676
MA0862.1	GMEB2	SAND domain factors	GMEB	628	40619	1652	119875	0.0152253	0.0135937	0.165908	0.0153313	0.0169623
MA0727.1	NR3C2	Nuclear receptors with C4 zinc fingers	Steroid hormone receptors (NR3)	3925	37322	12061	109466	0.0951584	0.0992454	-0.067188	0.0158361	0.0174869
MA0819.1	CLOCK	Basic helix-loop-helix factors (bHLH)	PAS domain factors	3411	37836	9611	111916	0.0826969	0.0790853	0.070097	0.0197256	0.02174
MA1141.1	FOS::JUND	Basic leucine zipper factors (bZIP)::Basic leucine zipper factors (bZIP)	Fos-related::Jun-related	7669	33578	21975	99552	0.185929	0.180824	0.0491599	0.0204428	0.0224871
MA0777.1	MYBL2	Tryptophan cluster factors	MybSANT domain factors	1199	40048	3270	118257	0.0290688	0.0269076	0.114675	0.0213414	0.0234305
MA1101.1	BACH2	Basic leucine zipper factors (bZIP)	Jun-related	10104	31143	30459	91068	0.244963	0.250636	-0.0439082	0.0215099	0.0235702
MA0730.1	RARA	Nuclear receptors with C4 zinc fingers	Thyroid hormone receptor-related factors (NR1)	9012	32235	25937	95590	0.218489	0.213426	0.0430996	0.0309271	0.0338247
MA0111.1	Spz1	Basic helix-loop-helix factors (bHLH)		9453	31794	27231	94296	0.22918	0.224074	0.0419932	0.0322544	0.035209
MA0832.1	Tcf21	Basic helix-loop-helix factors (bHLH)	Tal-related	9106	32141	27425	94102	0.220768	0.22567	-0.0407934	0.0391655	0.0426385
MA0855.1	RXRB	Nuclear receptors with C4 zinc fingers	RXR-related receptors (NR2)	6886	34361	20825	100702	0.166945	0.171361	-0.0453313	0.0392095	0.0426385
MA1148.1	PPARA::RXRA	Nuclear receptors with C4 zinc fingers::Nuclear receptors with C4 zinc fingers	Thyroid hormone receptor-related factors (NR1)::RXR-related receptors (NR2)	8587	32660	25851	95676	0.208185	0.212718	-0.0393631	0.051611	0.056018
MA0677.1	Nr2f6	Nuclear receptors with C4 zinc fingers	RXR-related receptors (NR2)	7865	33382	23703	97824	0.190681	0.195043	-0.0404342	0.0534443	0.057898
MA0095.2	YY1	C2H2 zinc finger factors	More than 3 adjacent zinc fingers	9820	31427	28388	93139	0.238078	0.233594	0.0359289	0.0635363	0.0687008
MA0648.1	GSC	Homeo domain factors	Paired-related HD factors	3117	38130	9517	112010	0.0755691	0.0783118	-0.0556776	0.0736111	0.0794444
MA0820.1	FIGLA	Basic helix-loop-helix factors (bHLH)	Tal-related	11323	29924	33902	87625	0.274517	0.278967	-0.0320763	0.081359	0.087641
MA0775.1	MEIS3	Homeo domain factors	TALE-type homeo domain factors	7503	33744	22573	98954	0.181904	0.185745	-0.0369326	0.0831758	0.0894296
MA1128.1	FOSL1::JUN	Basic leucine zipper factors (bZIP)::Basic leucine zipper factors (bZIP)	Fos-related::Jun-related	7543	33704	21783	99744	0.182874	0.179244	0.0353546	0.09828	0.105418
MA0620.2	MITF	Basic helix-loop-helix factors (bHLH)	bHLH-ZIP	4052	37195	11601	109926	0.0982374	0.0954603	0.0458106	0.0984146	0.105418
MA1130.1	FOSL2::JUN	Basic leucine zipper factors (bZIP)::Basic leucine zipper factors (bZIP)	Fos-related::Jun-related	6973	34274	20119	101408	0.169055	0.165552	0.0362786	0.100041	0.10696
MA0860.1	Rarg	Nuclear receptors with C4 zinc fingers	Thyroid hormone receptor-related factors (NR1)	8186	33061	24554	96973	0.198463	0.202046	-0.0322756	0.117874	0.12579
MA0642.1	EN2	Homeo domain factors	NK	3055	38192	9285	112242	0.074066	0.0764028	-0.0484966	0.123727	0.131791
MA0099.3	FOS::JUN	Basic leucine zipper factors (bZIP)::Basic leucine zipper factors (bZIP)	Fos-related::Jun-related	6833	34414	19739	101788	0.165661	0.162425	0.0340428	0.124998	0.132897
MA1134.1	FOS::JUNB	Basic leucine zipper factors (bZIP)::Basic leucine zipper factors (bZIP)	Fos-related::Jun-related	6485	34762	18737	102790	0.157224	0.15418	0.0334061	0.140906	0.149532
MA0871.1	TFEC	Basic helix-loop-helix factors (bHLH)	bHLH-ZIP	4990	36257	14372	107155	0.120978	0.118262	0.0372196	0.141612	0.150004
MA1137.1	FOSL1::JUNB	Basic leucine zipper factors (bZIP)::Basic leucine zipper factors (bZIP)	Fos-related::Jun-related	6860	34387	19841	101686	0.166315	0.163264	0.0319823	0.148042	0.156525
MA0066.1	PPARG	Nuclear receptors with C4 zinc fingers	Thyroid hormone receptor-related factors (NR1)	7543	33704	22602	98925	0.182874	0.185983	-0.0298254	0.161232	0.170156
MA0476.1	FOS	Basic leucine zipper factors (bZIP)	Fos-related	7680	33567	23002	98525	0.186195	0.189275	-0.0291354	0.168549	0.177551
MA0611.1	Dux	Homeo domain factors	Paired-related HD factors	4298	36949	12939	108588	0.104202	0.10647	-0.0347539	0.19806	0.208254
MA0776.1	MYBL1	Tryptophan cluster factors	MybSANT domain factors	1077	40170	3037	118490	0.026111	0.0249903	0.0649503	0.21039	0.220813
MA0489.1	JUN	Basic leucine zipper factors (bZIP)	Jun-related	7841	33406	23444	98083	0.190099	0.192912	-0.0262138	0.210952	0.220997
MA0711.1	OTX1	Homeo domain factors	Paired-related HD factors	2099	39148	5996	115531	0.0508885	0.0493388	0.0469733	0.21308	0.222818
MA1144.1	FOSL2::JUND	Basic leucine zipper factors (bZIP)::Basic leucine zipper factors (bZIP)	Fos-related::Jun-related	6537	34710	18950	102577	0.158484	0.155932	0.0277872	0.218346	0.227908
MA1154.1	ZNF282	C2H2 zinc finger factors	More than 3 adjacent zinc fingers	8307	32940	24171	97356	0.201396	0.198894	0.0225663	0.272239	0.283644
MA0505.1	Nr5a2	Nuclear receptors with C4 zinc fingers	FTZF1related(NR5A)	11677	29570	34734	86793	0.283099	0.285813	-0.019235	0.291922	0.303599
MA0595.1	SREBF1	Basic helix-loop-helix factors (bHLH)	bHLH-ZIP	9029	32218	26898	94629	0.218901	0.221334	-0.0204457	0.306002	0.317665
MA1135.1	FOSB::JUNB	Basic leucine zipper factors (bZIP)::Basic leucine zipper factors (bZIP)	Fos-related::Jun-related	6675	34572	19412	102115	0.16183	0.159734	0.0224101	0.316392	0.327856
MA0774.1	MEIS2	Homeo domain factors	TALE-type homeo domain factors	9352	31895	27837	93690	0.226732	0.22906	-0.0190925	0.331826	0.343227
MA1420.1	IRF5	Tryptophan cluster factors	Interferon-regulatory factors	4360	36887	12642	108885	0.105705	0.104026	0.0257967	0.337285	0.348244
MA1138.1	FOSL2::JUNB	Basic leucine zipper factors (bZIP)::Basic leucine zipper factors (bZIP)	Fos-related::Jun-related	6459	34788	18823	102704	0.156593	0.154887	0.0187171	0.408832	0.421354
MA1142.1	FOSL1::JUND	Basic leucine zipper factors (bZIP)::Basic leucine zipper factors (bZIP)	Fos-related::Jun-related	6756	34491	19707	101820	0.163794	0.162161	0.0172623	0.439996	0.452658
MA0088.2	ZNF143	C2H2 zinc finger factors	More than 3 adjacent zinc fingers	9296	31951	27227	94300	0.225374	0.224041	0.011044	0.575448	0.589886
MA0794.1	PROX1	Homeo domain factors	HD-PROS factors	3105	38142	9047	112480	0.0752782	0.0744444	0.0173701	0.580358	0.593855
MA0114.3	Hnf4a	Nuclear receptors with C4 zinc fingers	RXR-related receptors (NR2)	7162	34085	20958	100569	0.173637	0.172456	0.0119102	0.582192	0.594667
MA0861.1	TP73	p53 domain factors	p53-related factors	4301	36946	12772	108755	0.104274	0.105096	-0.0126517	0.641981	0.654569
MA0739.1	Hic1	C2H2 zinc finger factors	Factors with multiple dispersed zinc fingers	10875	30372	31953	89574	0.263656	0.262929	0.00540285	0.775862	0.789668
MA0007.3	Ar	Nuclear receptors with C4 zinc fingers	Steroid hormone receptors (NR3)	5085	36162	14925	106602	0.123282	0.122812	0.00627688	0.801323	0.814133
MA0803.1	TBX15	T-Box factors	TBX1-related factors	7979	33268	23448	98079	0.193444	0.192945	0.0046241	0.822935	0.834608
MA0491.1	JUND	Basic leucine zipper factors (bZIP)	Jun-related	7369	33878	21674	99853	0.178655	0.178347	0.00303238	0.88756	0.898556
MA0511.2	RUNX2	Runt domain factors	Runt-related factors	4106	37141	12072	109455	0.0995466	0.099336	0.00339411	0.901472	0.911028
MA0074.1	RXRA::VDR	Nuclear receptors with C4 zinc fingers::Nuclear receptors with C4 zinc fingers	RXR-related receptors (NR2)::Thyroid hormone receptor-related factors (NR1)	4376	36871	12868	108659	0.106093	0.105886	0.00314602	0.904205	0.912179
MA0864.1	E2F2	Fork headwinged helix factors	E2F	1740	39507	5112	116415	0.0421849	0.0420647	0.00429622	0.920882	0.927367
MA0477.1	FOSL1	Basic leucine zipper factors (bZIP)	Fos-related	7471	33776	21992	99535	0.181128	0.180964	0.00161662	0.941009	0.945971
MA0490.1	JUNB	Basic leucine zipper factors (bZIP)	Jun-related	7699	33548	22674	98853	0.186656	0.186576	0.000728162	0.97083	0.973286
MA0093.2	USF1	Basic helix-loop-helix factors (bHLH)	bHLH-ZIP	8243	33004	24298	97229	0.199845	0.199939	-0.000875065	0.971585	0.973286

## Sheet: 3.AD_vs_0.NCI_Immature.up
Motif	Motif Name	Class	Family	Hits in list	Unhit in list	Hits in background	Unhit in background	Percent in list	Percent in background	Log2 Odds Ratio	PValue	QValue
MA0472.2	EGR2	C2H2 zinc finger factors	Three-zinc finger Kruppel-related	6	88	26733	94794	0.0638298	0.219976	-2.0483	8.24613e-05	0.0471678
MA0753.1	ZNF740	C2H2 zinc finger factors	Other factors with up to three adjacent zinc fingers	17	77	43749	77778	0.180851	0.359994	-1.3492	0.000216902	0.0495938
MA0733.1	EGR4	C2H2 zinc finger factors	Three-zinc finger Kruppel-related	15	79	40056	81471	0.159574	0.329606	-1.37261	0.000260107	0.0495938
MA0732.1	EGR3	C2H2 zinc finger factors	Three-zinc finger Kruppel-related	15	79	38698	82829	0.159574	0.318431	-1.299	0.000782766	0.111936
MA0676.1	Nr2e1	Nuclear receptors with C4 zinc fingers	RXR-related receptors (NR2)	26	68	18088	103439	0.276596	0.148839	1.12865	0.00125121	0.120114
MA1099.1	Hes1	Basic helix-loop-helix factors (bHLH)	Hairy-related factors	3	91	16284	105243	0.0319149	0.133995	-2.23063	0.00132172	0.120114
MA0768.1	LEF1	High-mobility group (HMG) domain factors	TCF-7-related factors	31	63	23316	98211	0.329787	0.191859	1.05151	0.00146992	0.120114
MA0632.1	Tcfl5	Basic helix-loop-helix factors (bHLH)	PAS domain factors	2	92	13384	108143	0.0212766	0.110132	-2.50919	0.00255875	0.182951
MA0527.1	ZBTB33	C2H2 zinc finger factors	Other factors with up to three adjacent zinc fingers	2	92	12866	108661	0.0212766	0.105869	-2.44535	0.00376064	0.200236
MA0823.1	HEY1	Basic helix-loop-helix factors (bHLH)	Hairy-related factors	2	92	12961	108566	0.0212766	0.106651	-2.45723	0.00379396	0.200236
MA0017.2	NR2F1	Nuclear receptors with C4 zinc fingers	RXR-related receptors (NR2)	36	58	30109	91418	0.382979	0.247756	0.914155	0.0038507	0.200236
MA0741.1	KLF16	C2H2 zinc finger factors	Three-zinc finger Kruppel-related	32	62	59159	62368	0.340426	0.486797	-0.877974	0.00509682	0.217911
MA0050.2	IRF1	Tryptophan cluster factors	Interferon-regulatory factors	59	35	58658	62869	0.62766	0.482675	0.853362	0.00519773	0.217911
MA0685.1	SP4	C2H2 zinc finger factors	Three-zinc finger Kruppel-related	22	72	45188	76339	0.234043	0.371835	-0.954004	0.00533349	0.217911
MA0626.1	Npas2	Basic helix-loop-helix factors (bHLH)	PAS domain factors	2	92	11856	109671	0.0212766	0.0975586	-2.31406	0.00802266	0.279916
MA0825.1	MNT	Basic helix-loop-helix factors (bHLH)	bHLH-ZIP	2	92	11992	109535	0.0212766	0.0986777	-2.3323	0.00817108	0.279916
MA0649.1	HEY2	Basic helix-loop-helix factors (bHLH)	Hairy-related factors	4	90	15743	105784	0.0425532	0.129543	-1.74351	0.00831918	0.279916
MA0642.1	EN2	Homeo domain factors	NK	1	93	9285	112242	0.0106383	0.0764028	-2.94358	0.0100185	0.318366
MA0730.1	RARA	Nuclear receptors with C4 zinc fingers	Thyroid hormone receptor-related factors (NR1)	30	64	25937	95590	0.319149	0.213426	0.788729	0.0163051	0.408509
MA0875.1	BARX1	Homeo domain factors	NK	2	92	10535	110992	0.0212766	0.0866886	-2.12636	0.0165449	0.408509
MA0475.2	FLI1	Tryptophan cluster factors	Ets-related	3	91	12731	108796	0.0319149	0.104759	-1.82762	0.017029	0.408509
MA0162.3	EGR1	C2H2 zinc finger factors	Three-zinc finger Kruppel-related	11	83	26276	95251	0.117021	0.216215	-1.05757	0.0170401	0.408509
MA0622.1	Mlxip	Basic helix-loop-helix factors (bHLH)	bHLH-ZIP	3	91	12814	108713	0.0319149	0.105442	-1.83809	0.0171402	0.408509
MA0111.1	Spz1	Basic helix-loop-helix factors (bHLH)		31	63	27231	94296	0.329787	0.224074	0.768854	0.0182507	0.417576
MA0104.4	MYCN	Basic helix-loop-helix factors (bHLH)	bHLH-ZIP	5	89	16095	105432	0.0531915	0.13244	-1.44217	0.0212613	0.424968
MA0083.3	SRF	MADS box factors	Responders to external signals (SRFRLM1)	1	93	8111	113416	0.0106383	0.0667424	-2.73355	0.02129	0.424968
MA0680.1	PAX7	Paired box factors	Paired plus homeo domain	0	94	5531	115996	0	0.0455125	-inf	0.0230492	0.424968
MA0509.1	Rfx1	Fork headwinged helix factors	RFX-related factors	14	80	30340	91187	0.148936	0.249656	-0.926882	0.0231962	0.424968
MA0657.1	KLF13	C2H2 zinc finger factors	Three-zinc finger Kruppel-related	9	85	22517	99010	0.0957447	0.185284	-1.10288	0.023487	0.424968
MA0141.3	ESRRB	Nuclear receptors with C4 zinc fingers	Steroid hormone receptors (NR3)	24	70	19934	101593	0.255319	0.164029	0.805167	0.0246147	0.424968
MA0473.2	ELF1	Tryptophan cluster factors	Ets-related	6	88	17256	104271	0.0638298	0.141993	-1.2793	0.0261905	0.424968
MA0740.1	KLF14	C2H2 zinc finger factors	Three-zinc finger Kruppel-related	20	74	39032	82495	0.212766	0.32118	-0.80787	0.0265828	0.424968
MA1108.1	MXI1	Basic helix-loop-helix factors (bHLH)	bHLH-ZIP	6	88	17692	103835	0.0638298	0.145581	-1.32134	0.0266463	0.424968
MA0833.1	ATF4	Basic leucine zipper factors (bZIP)	ATF-4-related factors	17	77	12849	108678	0.180851	0.10573	0.900952	0.027208	0.424968
MA0744.1	SCRT2	C2H2 zinc finger factors	More than 3 adjacent zinc fingers	22	72	17960	103567	0.234043	0.147786	0.817201	0.0277288	0.424968
MA0669.1	NEUROG2	Basic helix-loop-helix factors (bHLH)	Tal-related	19	75	15128	106399	0.202128	0.124483	0.833289	0.0283323	0.424968
MA0098.3	ETS1	Tryptophan cluster factors	Ets-related	5	89	15347	106180	0.0531915	0.126285	-1.36332	0.0290897	0.424968
MA0767.1	GCM2	GCM domain factors	GCM	5	89	15729	105798	0.0531915	0.129428	-1.40399	0.0295954	0.424968
MA1100.1	ASCL1	Basic helix-loop-helix factors (bHLH)	MyoDASC-related factors	37	57	61772	59755	0.393617	0.508299	-0.671315	0.0298732	0.424968
MA0808.1	TEAD3	TEA domain factors	TEF-1-related factors	22	72	18485	103042	0.234043	0.152106	0.768301	0.0313831	0.424968
MA0854.1	Alx1	Homeo domain factors	Paired-related HD factors	1	93	7845	113682	0.0106383	0.0645536	-2.68206	0.0319469	0.424968
MA0608.1	Creb3l2	Basic leucine zipper factors (bZIP)	CREB-related factors	2	92	9663	111864	0.0212766	0.0795132	-1.99042	0.0337748	0.43737
MA0059.1	MAX::MYC	Basic helix-loop-helix factors (bHLH)::Basic helix-loop-helix factors (bHLH)	bHLH-ZIP::bHLH-ZIP	6	88	16642	104885	0.0638298	0.136941	-1.21856	0.0355099	0.43737
MA0507.1	POU2F2	Homeo domain factors	POU domain factors	10	84	23147	98380	0.106383	0.190468	-0.982824	0.0355539	0.43737
MA0655.1	JDP2	Basic leucine zipper factors (bZIP)	Fos-related	6	88	17085	104442	0.0638298	0.140586	-1.26256	0.0359377	0.43737
MA0746.1	SP3	C2H2 zinc finger factors	Three-zinc finger Kruppel-related	36	58	59929	61598	0.382979	0.493133	-0.648414	0.0385589	0.452601
MA0071.1	RORA	Nuclear receptors with C4 zinc fingers	Thyroid hormone receptor-related factors (NR1)	21	73	17623	103904	0.223404	0.145013	0.762201	0.0391385	0.452601
MA0872.1	TFAP2A	Basic helix-span-helix factors (bHSH)	AP-2	18	76	35208	86319	0.191489	0.289713	-0.784233	0.0399781	0.452601
MA0697.1	ZIC3	C2H2 zinc finger factors	More than 3 adjacent zinc fingers	24	70	43550	77977	0.255319	0.358357	-0.703939	0.040576	0.452601
MA0131.2	HINFP	C2H2 zinc finger factors	Factors with multiple dispersed zinc fingers	9	85	21420	100107	0.0957447	0.176257	-1.01493	0.0414876	0.452601
MA0029.1	Mecom	C2H2 zinc finger factors	Factors with multiple dispersed zinc fingers	19	75	15465	106062	0.202128	0.127256	0.796926	0.0420894	0.452601
MA0728.1	Nr2F6	Nuclear receptors with C4 zinc fingers	RXR-related receptors (NR2)	28	66	25594	95933	0.297872	0.210603	0.669175	0.0428628	0.452601
MA0474.2	ERG	Tryptophan cluster factors	Ets-related	4	90	12972	108555	0.0425532	0.106742	-1.42689	0.0435194	0.452601
MA0156.2	FEV	Tryptophan cluster factors	Ets-related	3	91	11038	110489	0.0319149	0.0908276	-1.59947	0.046516	0.463659
MA0763.1	ETV3	Tryptophan cluster factors	Ets-related	3	91	11055	110472	0.0319149	0.0909674	-1.60191	0.0465484	0.463659
MA0147.3	MYC	Basic helix-loop-helix factors (bHLH)	bHLH-ZIP	10	84	23063	98464	0.106383	0.189777	-0.976349	0.0470144	0.463659
MA0751.1	ZIC4	C2H2 zinc finger factors	More than 3 adjacent zinc fingers	23	71	41770	79757	0.244681	0.34371	-0.693036	0.0499444	0.484207
MA1152.1	SOX15	High-mobility group (HMG) domain factors	SOX-related factors	31	63	28952	92575	0.329787	0.238235	0.653869	0.0515832	0.49176
MA0510.2	RFX5	Fork headwinged helix factors	RFX-related factors	5	89	14267	107260	0.0531915	0.117398	-1.24344	0.053581	0.498301
MA0523.1	TCF7L2	High-mobility group (HMG) domain factors	TCF-7-related factors	27	67	24903	96624	0.287234	0.204917	0.644853	0.0548011	0.498301
MA0735.1	GLIS1	C2H2 zinc finger factors	More than 3 adjacent zinc fingers	7	87	17749	103778	0.0744681	0.14605	-1.08789	0.0558889	0.498301
MA0007.3	Ar	Nuclear receptors with C4 zinc fingers	Steroid hormone receptors (NR3)	18	76	14925	106602	0.191489	0.122812	0.758416	0.0569467	0.498301
MA0727.1	NR3C2	Nuclear receptors with C4 zinc fingers	Steroid hormone receptors (NR3)	15	79	12061	109466	0.159574	0.0992454	0.785159	0.0571711	0.498301
MA0729.1	RARA	Nuclear receptors with C4 zinc fingers	Thyroid hormone receptor-related factors (NR1)	24	70	21681	99846	0.255319	0.178405	0.658944	0.0586922	0.498301
MA0897.1	Hmx2	Homeo domain factors	NK	4	90	12327	109200	0.0425532	0.101434	-1.34477	0.059284	0.498301
MA0058.3	MAX	Basic helix-loop-helix factors (bHLH)	bHLH-ZIP	4	90	12297	109230	0.0425532	0.101187	-1.34086	0.0592871	0.498301
MA0051.1	IRF2	Tryptophan cluster factors	Interferon-regulatory factors	24	70	21829	99698	0.255319	0.179623	0.646989	0.0602021	0.498301
MA0747.1	SP8	C2H2 zinc finger factors	Three-zinc finger Kruppel-related	34	60	56221	65306	0.361702	0.462621	-0.603313	0.061948	0.498301
MA0880.1	Dlx3	Homeo domain factors	NK	9	85	6301	115226	0.0957447	0.0518486	0.953287	0.0619578	0.498301
MA1102.1	CTCFL	C2H2 zinc finger factors	More than 3 adjacent zinc fingers	38	56	61315	60212	0.404255	0.504538	-0.585603	0.0627232	0.498301
MA0603.1	Arntl	Basic helix-loop-helix factors (bHLH)	PAS domain factors	3	91	10448	111079	0.0319149	0.0859727	-1.51254	0.0641484	0.498337
MA1118.1	SIX1	Homeo domain factors	HD-SINE	19	75	16068	105459	0.202128	0.132218	0.733516	0.0652116	0.498337
MA0621.1	mix-a	Homeo domain factors	Paired-related HD factors	3	91	10719	110808	0.0319149	0.0882026	-1.553	0.0653414	0.498337
MA0489.1	JUN	Basic leucine zipper factors (bZIP)	Jun-related	11	83	23444	98083	0.117021	0.192912	-0.850801	0.0667018	0.502019
MA0594.1	Hoxa9	Homeo domain factors	HOX	16	78	13333	108194	0.170213	0.109712	0.735131	0.0683918	0.508054
MA0512.2	Rxra	Nuclear receptors with C4 zinc fingers	RXR-related receptors (NR2)	23	71	20662	100865	0.244681	0.17002	0.661179	0.072421	0.525189
MA0694.1	ZBTB7B	C2H2 zinc finger factors	More than 3 adjacent zinc fingers	12	82	24747	96780	0.12766	0.203634	-0.805108	0.0725348	0.525189
MA0855.1	RXRB	Nuclear receptors with C4 zinc fingers	RXR-related receptors (NR2)	23	71	20825	100702	0.244681	0.171361	0.647509	0.0735355	0.525779
MA0154.3	EBF1	Rel homology region (RHR) factors	Early B-Cell Factor-related factors	32	62	31101	90426	0.340426	0.255918	0.585575	0.075166	0.530802
MA0002.2	Runx1	Runt domain factors	Runt-related factors	39	55	39603	81924	0.414894	0.325878	0.552747	0.0775988	0.541299
MA1107.1	KLF9	C2H2 zinc finger factors	Three-zinc finger Kruppel-related	39	55	61899	59628	0.414894	0.509344	-0.549871	0.0789144	0.543236
MA1146.1	NR1H4::RXRA	Nuclear receptors with C4 zinc fingers::Nuclear receptors with C4 zinc fingers	Thyroid hormone receptor-related factors (NR1)::RXR-related receptors (NR2)	17	77	14614	106913	0.180851	0.120253	0.691675	0.0797759	0.543236
MA0674.1	NKX6-1	Homeo domain factors	NK	4	90	12053	109474	0.0425532	0.0991796	-1.30872	0.081252	0.546778
MA0633.1	Twist2	Basic helix-loop-helix factors (bHLH)	Tal-related	17	77	14767	106760	0.180851	0.121512	0.674583	0.0825022	0.548735
MA0062.2	Gabpa	Tryptophan cluster factors	Ets-related	11	83	23056	98471	0.117021	0.189719	-0.821031	0.0858645	0.552939
MA0490.1	JUNB	Basic leucine zipper factors (bZIP)	Jun-related	11	83	22674	98853	0.117021	0.186576	-0.791344	0.0859403	0.552939
MA1147.1	NR4A2::RXRA	Nuclear receptors with C4 zinc fingers::Nuclear receptors with C4 zinc fingers	NGFI-B-related receptors (NR4)::RXR-related receptors (NR2)	18	76	15503	106024	0.191489	0.127568	0.695754	0.0862688	0.552939
MA1150.1	RORB	Nuclear receptors with C4 zinc fingers	Thyroid hormone receptor-related factors (NR1)	18	76	15718	105809	0.191489	0.129338	0.672955	0.0885187	0.552939
MA1106.1	HIF1A	Basic helix-loop-helix factors (bHLH)	PAS domain factors	3	91	10092	111435	0.0319149	0.0830433	-1.45791	0.0888732	0.552939
MA0750.2	ZBTB7A	C2H2 zinc finger factors	More than 3 adjacent zinc fingers	20	74	36047	85480	0.212766	0.296617	-0.641839	0.0894733	0.552939
MA0812.1	TFAP2B	Basic helix-span-helix factors (bHSH)	AP-2	20	74	35575	85952	0.212766	0.292733	-0.614893	0.09013	0.552939
MA0769.1	Tcf7	High-mobility group (HMG) domain factors	TCF-7-related factors	25	69	23766	97761	0.265957	0.195561	0.575685	0.0908677	0.552939
MA1137.1	FOSL1::JUNB	Basic leucine zipper factors (bZIP)::Basic leucine zipper factors (bZIP)	Fos-related::Jun-related	9	85	19841	101686	0.0957447	0.163264	-0.881889	0.0923221	0.554783
MA0860.1	Rarg	Nuclear receptors with C4 zinc fingers	Thyroid hormone receptor-related factors (NR1)	26	68	24554	96973	0.276596	0.202046	0.594595	0.0934006	0.554783
MA0663.1	MLX	Basic helix-loop-helix factors (bHLH)	bHLH-ZIP	2	92	8104	113423	0.0212766	0.0666848	-1.71662	0.0940803	0.554783
MA0881.1	Dlx4	Homeo domain factors	NK	11	83	8439	113088	0.117021	0.0694414	0.828611	0.0986373	0.564641
MA0041.1	Foxd3	Fork headwinged helix factors	FOX	32	62	31732	89795	0.340426	0.261111	0.546495	0.0990918	0.564641
MA1117.1	RELB	Rel homology region (RHR) factors	NF-kappaB-related factors	13	81	25577	95950	0.138298	0.210464	-0.731948	0.0991525	0.564641
MA0515.1	Sox6	High-mobility group (HMG) domain factors	SOX-related factors	32	62	31864	89663	0.340426	0.262197	0.538384	0.0997006	0.564641
MA0809.1	TEAD4	TEA domain factors	TEF-1-related factors	23	71	21791	99736	0.244681	0.17931	0.568189	0.106114	0.589861
MA0714.1	PITX3	Homeo domain factors	Paired-related HD factors	13	81	11011	110516	0.138298	0.0906054	0.68781	0.106632	0.589861
MA0736.1	GLIS2	C2H2 zinc finger factors	More than 3 adjacent zinc fingers	19	75	34131	87396	0.202128	0.280851	-0.62446	0.107248	0.589861
MA0712.1	OTX2	Homeo domain factors	Paired-related HD factors	11	83	8924	112603	0.117021	0.0734322	0.741788	0.111375	0.606728
MA0113.3	NR3C1	Nuclear receptors with C4 zinc fingers	Steroid hormone receptors (NR3)	14	80	11985	109542	0.148936	0.0986201	0.677591	0.116399	0.625723
MA0725.1	VSX1	Homeo domain factors	Paired-related HD factors	3	91	9237	112290	0.0319149	0.0760078	-1.31916	0.119592	0.625723
MA0726.1	VSX2	Homeo domain factors	Paired-related HD factors	3	91	9237	112290	0.0319149	0.0760078	-1.31916	0.119592	0.625723
MA0748.1	YY2	C2H2 zinc finger factors	More than 3 adjacent zinc fingers	3	91	9360	112167	0.0319149	0.0770199	-1.33983	0.11976	0.625723
MA0464.2	BHLHE40	Basic helix-loop-helix factors (bHLH)	Hairy-related factors	3	91	9507	112020	0.0319149	0.0782295	-1.3642	0.120611	0.625723
MA0784.1	POU1F1	Homeo domain factors	POU domain factors	21	73	19647	101880	0.223404	0.161668	0.576974	0.121425	0.625723
MA0671.1	NFIX	SMADNF-1 DNA-binding domain factors	Nuclear factor 1	31	63	31188	90339	0.329787	0.256634	0.511269	0.123701	0.63176
MA0898.1	Hmx3	Homeo domain factors	NK	5	89	12474	109053	0.0531915	0.102644	-1.02576	0.126664	0.632151
MA0853.1	Alx4	Homeo domain factors	Paired-related HD factors	2	92	7268	114259	0.0212766	0.0598056	-1.54895	0.129335	0.632151
MA0636.1	BHLHE41	Basic helix-loop-helix factors (bHLH)	Hairy-related factors	2	92	7687	113840	0.0212766	0.0632534	-1.63511	0.132021	0.632151
MA0815.1	TFAP2C	Basic helix-span-helix factors (bHSH)	AP-2	19	75	33456	88071	0.202128	0.275297	-0.584424	0.132629	0.632151
MA1113.1	PBX2	Homeo domain factors	TALE-type homeo domain factors	22	72	21063	100464	0.234043	0.17332	0.543395	0.132644	0.632151
MA0876.1	BSX	Homeo domain factors	NK	12	82	10192	111335	0.12766	0.0838661	0.676789	0.13381	0.632151
MA1119.1	SIX2	Homeo domain factors	HD-SINE	22	72	21253	100274	0.234043	0.174883	0.527709	0.135259	0.632151
MA0014.3	PAX5	Paired box factors	Paired domain only	22	72	21293	100234	0.234043	0.175212	0.52442	0.135885	0.632151
MA0822.1	HES7	Basic helix-loop-helix factors (bHLH)	Hairy-related factors	8	86	16975	104552	0.0851064	0.139681	-0.803519	0.138024	0.632151
MA0506.1	NRF1	Basic leucine zipper factors (bZIP)	Jun-related	15	79	27532	93995	0.159574	0.22655	-0.625387	0.138855	0.632151
MA0790.1	POU4F1	Homeo domain factors	POU domain factors	8	86	17445	104082	0.0851064	0.143548	-0.849421	0.138909	0.632151
MA0832.1	Tcf21	Basic helix-loop-helix factors (bHLH)	Tal-related	15	79	27425	94102	0.159574	0.22567	-0.618129	0.138957	0.632151
MA0846.1	FOXC2	Fork headwinged helix factors	FOX	15	79	27780	93747	0.159574	0.228591	-0.642133	0.13925	0.632151
MA0909.1	HOXD13	Homeo domain factors	HOX	19	75	17735	103792	0.202128	0.145935	0.568123	0.141828	0.637774
MA0102.3	CEBPA	Basic leucine zipper factors (bZIP)	CEBP-related	19	75	17928	103599	0.202128	0.147523	0.549823	0.144643	0.637774
MA0476.1	FOS	Basic leucine zipper factors (bZIP)	Fos-related	12	82	23002	98525	0.12766	0.189275	-0.673844	0.147088	0.637774
MA0602.1	Arid5a	ARID	ARID-related	13	81	11067	110460	0.138298	0.0910662	0.679759	0.147136	0.637774
MA0625.1	NFATC3	Rel homology region (RHR) factors	NFAT-related factors	12	82	23190	98337	0.12766	0.190822	-0.688342	0.147403	0.637774
MA0743.1	SCRT1	C2H2 zinc finger factors	More than 3 adjacent zinc fingers	19	75	18089	103438	0.202128	0.148848	0.534682	0.147544	0.637774
MA0719.1	RHOXF1	Homeo domain factors	Paired-related HD factors	16	78	14452	107075	0.170213	0.11892	0.603865	0.148423	0.637774
MA0742.1	Klf12	C2H2 zinc finger factors	Three-zinc finger Kruppel-related	23	71	38650	82877	0.244681	0.318036	-0.525696	0.149409	0.637774
MA0479.1	FOXH1	Fork headwinged helix factors	FOX	20	74	18920	102607	0.212766	0.155686	0.551611	0.152625	0.646677
MA0101.1	REL	Rel homology region (RHR) factors	NF-kappaB-related factors	13	81	24266	97261	0.138298	0.199676	-0.636468	0.155753	0.650467
MA0522.2	TCF3	Basic helix-loop-helix factors (bHLH)	E2A	25	69	41357	80170	0.265957	0.340311	-0.509733	0.156362	0.650467
MA0672.1	NKX2-3	Homeo domain factors	NK	20	74	19258	102269	0.212766	0.158467	0.521306	0.157005	0.650467
MA0859.1	Rarg	Nuclear receptors with C4 zinc fingers	Thyroid hormone receptor-related factors (NR1)	25	69	25050	96477	0.265957	0.206127	0.480701	0.16033	0.650467
MA0762.1	ETV2	Tryptophan cluster factors	Ets-related	7	87	15445	106082	0.0744681	0.127091	-0.855613	0.161107	0.650467
MA0027.2	EN1	Homeo domain factors	NK	3	91	8628	112899	0.0319149	0.0709966	-1.21296	0.161565	0.650467
MA0099.3	FOS::JUN	Basic leucine zipper factors (bZIP)::Basic leucine zipper factors (bZIP)	Fos-related::Jun-related	10	84	19739	101788	0.106383	0.162425	-0.703933	0.161914	0.650467
MA0161.2	NFIC	SMADNF-1 DNA-binding domain factors	Nuclear factor 1	32	62	33122	88405	0.340426	0.272548	0.462138	0.163593	0.650467
MA0756.1	ONECUT2	Homeo domain factors	HD-CUT	3	91	9052	112475	0.0319149	0.0744855	-1.2876	0.164015	0.650467
MA0259.1	ARNT::HIF1A	Basic helix-loop-helix factors (bHLH)::Basic helix-loop-helix factors (bHLH)	PAS domain factors::PAS domain factors	5	89	11931	109596	0.0531915	0.0981757	-0.954391	0.165936	0.650467
MA0600.2	RFX2	Fork headwinged helix factors	RFX-related factors	5	89	12037	109490	0.0531915	0.0990479	-0.968547	0.166028	0.650467
MA0030.1	FOXF2	Fork headwinged helix factors	FOX	17	77	15985	105542	0.180851	0.131535	0.543693	0.167867	0.653195
MA0505.1	Nr5a2	Nuclear receptors with C4 zinc fingers	FTZF1related(NR5A)	33	61	34734	86793	0.351064	0.285813	0.434889	0.170782	0.660051
MA0114.3	Hnf4a	Nuclear receptors with C4 zinc fingers	RXR-related receptors (NR2)	11	83	20958	100569	0.117021	0.172456	-0.652984	0.173002	0.664143
MA0112.3	ESR1	Nuclear receptors with C4 zinc fingers	Steroid hormone receptors (NR3)	22	72	21610	99917	0.234043	0.177821	0.498531	0.175664	0.668882
MA0461.2	Atoh1	Basic helix-loop-helix factors (bHLH)	Tal-related	14	80	12829	108698	0.148936	0.105565	0.568257	0.17735	0.668882
MA0774.1	MEIS2	Homeo domain factors	TALE-type homeo domain factors	27	67	27837	93690	0.287234	0.22906	0.439685	0.178148	0.668882
MA0076.2	ELK4	Tryptophan cluster factors	Ets-related	16	78	28146	93381	0.170213	0.231603	-0.555177	0.178914	0.668882
MA0874.1	Arx	Homeo domain factors	Paired-related HD factors	2	92	7116	114411	0.0212766	0.0585549	-1.51654	0.181084	0.672598
MA0760.1	ERF	Tryptophan cluster factors	Ets-related	6	88	13499	108028	0.0638298	0.111078	-0.873982	0.186803	0.676511
MA0757.1	ONECUT3	Homeo domain factors	HD-CUT	6	88	13630	107897	0.0638298	0.112156	-0.889665	0.187836	0.676511
MA0798.1	RFX3	Fork headwinged helix factors	RFX-related factors	6	88	13684	107843	0.0638298	0.1126	-0.896092	0.188401	0.676511
MA0068.2	PAX4	Paired box factors	Paired plus homeo domain	1	93	4951	116576	0.0106383	0.0407399	-1.98174	0.189246	0.676511
MA0761.1	ETV1	Tryptophan cluster factors	Ets-related	4	90	10066	111461	0.0425532	0.0828293	-1.02281	0.190087	0.676511
MA0764.1	ETV4	Tryptophan cluster factors	Ets-related	4	90	10162	111365	0.0425532	0.0836193	-1.03775	0.19035	0.676511
MA0830.1	TCF4	Basic helix-loop-helix factors (bHLH)	E2A	26	68	41782	79745	0.276596	0.343808	-0.454509	0.192613	0.676511
MA0765.1	ETV5	Tryptophan cluster factors	Ets-related	4	90	10479	111048	0.0425532	0.0862278	-1.08624	0.193589	0.676511
MA0075.2	Prrx2	Homeo domain factors	Paired-related HD factors	9	85	7567	113960	0.0957447	0.062266	0.673174	0.194024	0.676511
MA0628.1	POU6F1	Homeo domain factors	POU domain factors	1	93	5263	116264	0.0106383	0.0433072	-2.07377	0.195178	0.676511
MA0514.1	Sox3	High-mobility group (HMG) domain factors	SOX-related factors	39	55	42598	78929	0.414894	0.350523	0.393767	0.195567	0.676511
MA0858.1	Rarb	Nuclear receptors with C4 zinc fingers	Thyroid hormone receptor-related factors (NR1)	19	75	18616	102911	0.202128	0.153184	0.485884	0.19633	0.676511
MA1135.1	FOSB::JUNB	Basic leucine zipper factors (bZIP)::Basic leucine zipper factors (bZIP)	Fos-related::Jun-related	10	84	19412	102115	0.106383	0.159734	-0.675206	0.203351	0.696507
MA0140.2	GATA1::TAL1	Other C4 zinc finger-type factors::Basic helix-loop-helix factors (bHLH)	C4-GATA-related::Tal-related	16	78	15066	106461	0.170213	0.123972	0.535544	0.20756	0.700876
MA1148.1	PPARA::RXRA	Nuclear receptors with C4 zinc fingers::Nuclear receptors with C4 zinc fingers	Thyroid hormone receptor-related factors (NR1)::RXR-related receptors (NR2)	25	69	25851	95676	0.265957	0.212718	0.423264	0.208114	0.700876
MA0599.1	KLF5	C2H2 zinc finger factors	Three-zinc finger Kruppel-related	49	45	71516	50011	0.521277	0.588478	-0.393143	0.208302	0.700876
MA0856.1	RXRG	Nuclear receptors with C4 zinc fingers	RXR-related receptors (NR2)	20	74	20063	101464	0.212766	0.165091	0.450827	0.211493	0.707451
MA0028.2	ELK1	Tryptophan cluster factors	Ets-related	5	89	11572	109955	0.0531915	0.0952216	-0.905596	0.216219	0.711456
MA0664.1	MLXIPL	Basic helix-loop-helix factors (bHLH)	bHLH-ZIP	3	91	8181	113346	0.0319149	0.0673184	-1.13051	0.216324	0.711456
MA0759.1	ELK3	Tryptophan cluster factors	Ets-related	5	89	11600	109927	0.0531915	0.095452	-0.90945	0.216422	0.711456
MA0838.1	CEBPG	Basic leucine zipper factors (bZIP)	CEBP-related	7	87	5808	115719	0.0744681	0.0477918	0.680829	0.22049	0.712053
MA0135.1	Lhx3	Homeo domain factors	HD-LIM	8	86	15898	105629	0.0851064	0.130819	-0.69417	0.221624	0.712053
MA0821.1	HES5	Basic helix-loop-helix factors (bHLH)	Hairy-related factors	8	86	15862	105665	0.0851064	0.130522	-0.690407	0.221669	0.712053
MA0470.1	E2F4	Fork headwinged helix factors	E2F	17	77	28741	92786	0.180851	0.236499	-0.488505	0.225992	0.712053
MA0025.1	NFIL3	Basic leucine zipper factors (bZIP)	CEBP-related	10	84	8780	112747	0.106383	0.0722473	0.612313	0.226113	0.712053
MA1128.1	FOSL1::JUN	Basic leucine zipper factors (bZIP)::Basic leucine zipper factors (bZIP)	Fos-related::Jun-related	12	82	21783	99744	0.12766	0.179244	-0.577552	0.226135	0.712053
MA0491.1	JUND	Basic leucine zipper factors (bZIP)	Jun-related	12	82	21674	99853	0.12766	0.178347	-0.568739	0.226252	0.712053
MA1153.1	Smad4	SMADNF-1 DNA-binding domain factors	SMAD factors	17	77	16545	104982	0.180851	0.136143	0.486343	0.226562	0.712053
MA0775.1	MEIS3	Homeo domain factors	TALE-type homeo domain factors	22	72	22573	98954	0.234043	0.185745	0.421662	0.232472	0.723823
MA0711.1	OTX1	Homeo domain factors	Paired-related HD factors	7	87	5996	115531	0.0744681	0.0493388	0.632519	0.232897	0.723823
MA0837.1	CEBPE	Basic leucine zipper factors (bZIP)	CEBP-related	7	87	6013	115514	0.0744681	0.0494787	0.628221	0.234104	0.723823
MA0668.1	NEUROD2	Basic helix-loop-helix factors (bHLH)	Tal-related	10	84	9074	112453	0.106383	0.0746665	0.561031	0.236383	0.724365
MA0035.3	Gata1	Other C4 zinc finger-type factors	C4-GATA-related	9	85	17508	104019	0.0957447	0.144067	-0.668698	0.23802	0.724365
MA0103.3	ZEB1	Homeo domain factors	HD-ZF factors	29	65	45129	76398	0.308511	0.37135	-0.404903	0.240167	0.724365
MA0704.1	Lhx4	Homeo domain factors	HD-LIM	2	92	6231	115296	0.0212766	0.0512726	-1.31382	0.243266	0.724365
MA0901.1	HOXB13	Homeo domain factors	HOX	18	76	17998	103529	0.191489	0.148099	0.446117	0.244158	0.724365
MA1421.1	TCF7L1	High-mobility group (HMG) domain factors	TCF-7-related factors	23	71	23992	97535	0.244681	0.197421	0.397177	0.244579	0.724365
MA0465.1	CDX2	Homeo domain factors	HOX	18	76	18216	103311	0.191489	0.149893	0.425707	0.24863	0.724365
MA0841.1	NFE2	Basic leucine zipper factors (bZIP)	Jun-related	10	84	18538	102989	0.106383	0.152542	-0.59645	0.251478	0.724365
MA0641.1	ELF4	Tryptophan cluster factors	Ets-related	10	84	18707	102820	0.106383	0.153933	-0.611911	0.251742	0.724365
MA1134.1	FOS::JUNB	Basic leucine zipper factors (bZIP)::Basic leucine zipper factors (bZIP)	Fos-related::Jun-related	10	84	18737	102790	0.106383	0.15418	-0.614644	0.251858	0.724365
MA0496.2	MAFK	Basic leucine zipper factors (bZIP)	Maf-related	10	84	18798	102729	0.106383	0.154682	-0.620189	0.252158	0.724365
MA1138.1	FOSL2::JUNB	Basic leucine zipper factors (bZIP)::Basic leucine zipper factors (bZIP)	Fos-related::Jun-related	10	84	18823	102704	0.106383	0.154887	-0.622458	0.252305	0.724365
MA0596.1	SREBF2	Basic helix-loop-helix factors (bHLH)	bHLH-ZIP	24	70	25194	96333	0.255319	0.207312	0.390625	0.252497	0.724365
MA1144.1	FOSL2::JUND	Basic leucine zipper factors (bZIP)::Basic leucine zipper factors (bZIP)	Fos-related::Jun-related	10	84	18950	102577	0.106383	0.155932	-0.633944	0.253275	0.724365
MA0852.2	FOXK1	Fork headwinged helix factors	FOX	19	75	19115	102412	0.202128	0.15729	0.44071	0.255193	0.726221
MA0258.2	ESR2	Nuclear receptors with C4 zinc fingers	Steroid hormone receptors (NR3)	33	61	35802	85725	0.351064	0.294601	0.373366	0.257315	0.728634
MA0037.3	GATA3	Other C4 zinc finger-type factors	C4-GATA-related	11	83	10189	111338	0.117021	0.0838415	0.534237	0.259896	0.732318
MA0695.1	ZBTB7C	C2H2 zinc finger factors	More than 3 adjacent zinc fingers	16	78	26976	94551	0.170213	0.221975	-0.47597	0.264168	0.736514
MA1142.1	FOSL1::JUND	Basic leucine zipper factors (bZIP)::Basic leucine zipper factors (bZIP)	Fos-related::Jun-related	11	83	19707	101820	0.117021	0.162161	-0.54636	0.26493	0.736514
MA0003.3	TFAP2A	Basic helix-span-helix factors (bHSH)	AP-2	24	70	37746	83781	0.255319	0.310598	-0.393969	0.266526	0.736514
MA0895.1	HMBOX1	Homeo domain factors	POU domain factors	8	86	7128	114399	0.0851064	0.0586536	0.578144	0.267666	0.736514
MA0150.2	Nfe2l2	Basic leucine zipper factors (bZIP)	Jun-related	26	68	27645	93882	0.276596	0.22748	0.376803	0.267823	0.736514
MA0116.1	Znf423	C2H2 zinc finger factors	Factors with multiple dispersed zinc fingers	27	67	28980	92547	0.287234	0.238466	0.363924	0.276028	0.755445
MA0696.1	ZIC1	C2H2 zinc finger factors	More than 3 adjacent zinc fingers	27	67	42105	79422	0.287234	0.346466	-0.395678	0.27799	0.757191
MA1122.1	TFDP1	Fork headwinged helix factors	E2F	18	76	29482	92045	0.191489	0.242596	-0.435478	0.279675	0.758171
MA0801.1	MGA	T-Box factors	TBX6-related factors	21	73	22035	99492	0.223404	0.181318	0.377272	0.284735	0.768246
MA0851.1	Foxj3	Fork headwinged helix factors	FOX	13	81	22730	98797	0.138298	0.187037	-0.519531	0.288704	0.775299
MA0132.2	PDX1	Homeo domain factors	HOX	3	91	7958	113569	0.0319149	0.0654834	-1.08781	0.291272	0.775669
MA1110.1	NR1H4	Nuclear receptors with C4 zinc fingers	Thyroid hormone receptor-related factors (NR1)	16	78	16361	105166	0.170213	0.134629	0.398927	0.291707	0.775669
MA0665.1	MSC	Basic helix-loop-helix factors (bHLH)	Tal-related	20	74	32191	89336	0.212766	0.264888	-0.414914	0.29291	0.775669
MA0882.1	DLX6	Homeo domain factors	NK	9	85	8086	113441	0.0957447	0.0665367	0.570884	0.294452	0.776159
MA0905.1	HOXC10	Homeo domain factors	HOX	9	85	8169	113358	0.0957447	0.0672196	0.555096	0.29684	0.778864
MA0442.2	SOX10	High-mobility group (HMG) domain factors	SOX-related factors	31	63	33772	87755	0.329787	0.277897	0.354594	0.299464	0.782162
MA0884.1	DUXA	Homeo domain factors	Paired-related HD factors	12	82	11945	109582	0.12766	0.0982909	0.424933	0.301524	0.783961
MA0501.1	MAF::NFE2	Basic leucine zipper factors (bZIP)::Basic leucine zipper factors (bZIP)	Maf-related::Jun-related	23	71	24804	96723	0.244681	0.204103	0.337098	0.308623	0.798788
MA0631.1	Six3	Homeo domain factors	HD-SINE	9	85	8554	112973	0.0957447	0.0703877	0.483753	0.311844	0.803489
MA0635.1	BARHL2	Homeo domain factors	NK	6	88	5392	116135	0.0638298	0.0443687	0.554342	0.314271	0.803935
MA0494.1	Nr1h3::Rxra	Nuclear receptors with C4 zinc fingers::Nuclear receptors with C4 zinc fingers	Thyroid hormone receptor-related factors (NR1)::RXR-related receptors (NR2)	16	78	26139	95388	0.170213	0.215088	-0.417787	0.317611	0.803935
MA0702.1	LMX1A	Homeo domain factors	HD-LIM	4	90	8964	112563	0.0425532	0.0737614	-0.841473	0.323325	0.803935
MA0703.1	LMX1B	Homeo domain factors	HD-LIM	4	90	8964	112563	0.0425532	0.0737614	-0.841473	0.323325	0.803935
MA0659.1	MAFG	Basic leucine zipper factors (bZIP)	Maf-related	7	87	13482	108045	0.0744681	0.110938	-0.633058	0.324272	0.803935
MA0616.1	Hes2	Basic helix-loop-helix factors (bHLH)	Hairy-related factors	7	87	13342	108185	0.0744681	0.109786	-0.61613	0.324299	0.803935
MA0777.1	MYBL2	Tryptophan cluster factors	MybSANT domain factors	4	90	3270	118257	0.0425532	0.0269076	0.684614	0.324341	0.803935
MA0910.1	Hoxd8	Homeo domain factors	HOX	7	87	13575	107952	0.0744681	0.111704	-0.644218	0.324594	0.803935
MA0700.1	LHX2	Homeo domain factors	HD-LIM	4	90	9137	112390	0.0425532	0.0751849	-0.871276	0.324666	0.803935
MA0648.1	GSC	Homeo domain factors	Paired-related HD factors	10	84	9517	112010	0.106383	0.0783118	0.486572	0.332267	0.819211
MA0077.1	SOX9	High-mobility group (HMG) domain factors	SOX-related factors	14	80	14302	107225	0.148936	0.117686	0.391773	0.336204	0.821423
MA1125.1	ZNF384	C2H2 zinc finger factors	More than 3 adjacent zinc fingers	40	54	45478	76049	0.425532	0.374221	0.30878	0.337321	0.821423
MA0079.3	SP1	C2H2 zinc finger factors	Three-zinc finger Kruppel-related	54	40	76011	45516	0.574468	0.625466	-0.306854	0.337473	0.821423
MA0601.1	Arid3b	ARID	ARID-related	8	86	14910	106617	0.0851064	0.122689	-0.588174	0.344189	0.831154
MA0157.2	FOXO3	Fork headwinged helix factors	FOX	8	86	14943	106584	0.0851064	0.12296	-0.591811	0.344377	0.831154
MA1149.1	RARA::RXRG	Nuclear receptors with C4 zinc fingers::Nuclear receptors with C4 zinc fingers	Thyroid hormone receptor-related factors (NR1)::RXR-related receptors (NR2)	29	65	31946	89581	0.308511	0.262872	0.323194	0.347982	0.833571
MA0500.1	Myog	Basic helix-loop-helix factors (bHLH)	MyoDASC-related factors	35	59	51386	70141	0.37234	0.422836	-0.304474	0.348293	0.833571
MA0066.1	PPARG	Nuclear receptors with C4 zinc fingers	Thyroid hormone receptor-related factors (NR1)	21	73	22602	98925	0.223404	0.185983	0.332374	0.353284	0.836915
MA0828.1	SREBF2	Basic helix-loop-helix factors (bHLH)	bHLH-ZIP	5	89	10318	111209	0.0531915	0.0849029	-0.72371	0.353882	0.836915
MA0842.1	NRL	Basic leucine zipper factors (bZIP)	Maf-related	21	73	22656	98871	0.223404	0.186428	0.328144	0.354129	0.836915
MA0829.1	Srebf1	Basic helix-loop-helix factors (bHLH)	bHLH-ZIP	5	89	10670	110857	0.0531915	0.0877994	-0.776694	0.357972	0.836915
MA0903.1	HOXB3	Homeo domain factors	HOX	5	89	10670	110857	0.0531915	0.0877994	-0.776694	0.357972	0.836915
MA0820.1	FIGLA	Basic helix-loop-helix factors (bHLH)	Tal-related	22	72	33902	87625	0.234043	0.278967	-0.340499	0.359481	0.836915
MA0060.3	NFYA	Other alpha	NFY	9	85	16336	105191	0.0957447	0.134423	-0.552576	0.362366	0.838474
MA0813.1	TFAP2B	Basic helix-span-helix factors (bHSH)	AP-2	23	71	35439	86088	0.244681	0.291614	-0.345683	0.364228	0.838474
MA0078.1	Sox17	High-mobility group (HMG) domain factors	SOX-related factors	16	78	16568	104959	0.170213	0.136332	0.377947	0.365	0.838474
MA0142.1	Pou5f1::Sox2	Homeo domain factors::High-mobility group (HMG) domain factors	POU domain factors::SOX-related factors	23	71	25111	96416	0.244681	0.206629	0.314765	0.372203	0.850423
MA0039.3	KLF4	C2H2 zinc finger factors	Three-zinc finger Kruppel-related	25	69	37811	83716	0.265957	0.311133	-0.317939	0.374282	0.850423
MA0609.1	Crem	Basic leucine zipper factors (bZIP)	CREB-related factors	1	93	3731	117796	0.0106383	0.030701	-1.55857	0.375058	0.850423
MA1132.1	JUN::JUNB	Basic leucine zipper factors (bZIP)::Basic leucine zipper factors (bZIP)	Jun-related::Jun-related	10	84	17491	104036	0.106383	0.143927	-0.497986	0.377144	0.850423
MA0679.1	ONECUT1	Homeo domain factors	HD-CUT	3	91	7081	114446	0.0319149	0.0582669	-0.908293	0.377636	0.850423
MA0713.1	PHOX2A	Homeo domain factors	Paired-related HD factors	6	88	11453	110074	0.0638298	0.0942424	-0.60976	0.379668	0.851647
MA0857.1	Rarb	Nuclear receptors with C4 zinc fingers	Thyroid hormone receptor-related factors (NR1)	24	70	26497	95030	0.255319	0.218034	0.298231	0.382238	0.853682
MA0863.1	MTF1	C2H2 zinc finger factors	More than 3 adjacent zinc fingers	17	77	18131	103396	0.180851	0.149193	0.332311	0.384593	0.853682
MA0597.1	THAP1	C2CH THAP-type zinc finger factors	THAP-related factors	28	66	41929	79598	0.297872	0.345018	-0.312205	0.38557	0.853682
MA0115.1	NR1H2::RXRA	Nuclear receptors with C4 zinc fingers::Nuclear receptors with C4 zinc fingers	Thyroid hormone receptor-related factors (NR1)::RXR-related receptors (NR2)	17	77	18228	103299	0.180851	0.149991	0.323258	0.386545	0.853682
MA0138.2	REST	C2H2 zinc finger factors	Factors with multiple dispersed zinc fingers	30	64	44301	77226	0.319149	0.364536	-0.291306	0.392365	0.863204
MA1109.1	NEUROD1	Basic helix-loop-helix factors (bHLH)	Tal-related	40	54	46310	75217	0.425532	0.381068	0.266761	0.396003	0.867869
MA1116.1	RBPJ	Rel homology region (RHR) factors	CSL-related factors	40	54	46622	74905	0.425532	0.383635	0.251079	0.398433	0.868978
MA0804.1	TBX19	T-Box factors	Brachyury-related factors	8	86	7892	113635	0.0851064	0.0649403	0.421602	0.399548	0.868978
MA0036.3	GATA2	Other C4 zinc finger-type factors	C4-GATA-related	7	87	12839	108688	0.0744681	0.105647	-0.553996	0.402179	0.869006
MA1130.1	FOSL2::JUN	Basic leucine zipper factors (bZIP)::Basic leucine zipper factors (bZIP)	Fos-related::Jun-related	12	82	20119	101408	0.12766	0.165552	-0.439043	0.404267	0.869006
MA1101.1	BACH2	Basic leucine zipper factors (bZIP)	Jun-related	27	67	30459	91068	0.287234	0.250636	0.268914	0.406021	0.869006
MA0499.1	Myod1	Basic helix-loop-helix factors (bHLH)	MyoDASC-related factors	36	58	51825	69702	0.382979	0.426448	-0.260496	0.406352	0.869006
MA0478.1	FOSL2	Basic leucine zipper factors (bZIP)	Fos-related	20	74	30737	90790	0.212766	0.252923	-0.324955	0.407932	0.869006
MA0682.1	Pitx1	Homeo domain factors	Paired-related HD factors	13	81	13531	107996	0.138298	0.111342	0.357223	0.410187	0.869006
MA1111.1	NR2F2	Nuclear receptors with C4 zinc fingers	RXR-related receptors (NR2)	19	75	20702	100825	0.202128	0.170349	0.303089	0.410195	0.869006
MA0661.1	MEOX1	Homeo domain factors	HOX	4	90	8563	112964	0.0425532	0.0704617	-0.770302	0.416839	0.879822
MA0483.1	Gfi1B	C2H2 zinc finger factors	More than 3 adjacent zinc fingers	30	64	33868	87659	0.319149	0.278687	0.278817	0.420276	0.880949
MA1419.1	IRF4	Tryptophan cluster factors	Interferon-regulatory factors	8	86	14066	107461	0.0851064	0.115744	-0.492732	0.421964	0.880949
MA0799.1	RFX4	Fork headwinged helix factors	RFX-related factors	8	86	14406	107121	0.0851064	0.118542	-0.531761	0.423083	0.880949
MA1127.1	FOSB::JUN	Basic leucine zipper factors (bZIP)::Basic leucine zipper factors (bZIP)	Fos-related::Jun-related	9	85	8896	112631	0.0957447	0.0732018	0.422826	0.423533	0.880949
MA0468.1	DUX4	Homeo domain factors	Paired-related HD factors	14	80	14622	106905	0.148936	0.120319	0.355539	0.42556	0.881959
MA0105.4	NFKB1	Rel homology region (RHR) factors	NF-kappaB-related factors	21	73	23198	98329	0.223404	0.190888	0.286107	0.430595	0.88917
MA0486.2	HSF1	Heat shock factors	HSF factors	9	85	15650	105877	0.0957447	0.128778	-0.481307	0.440037	0.894595
MA0780.1	PAX3	Paired box factors	Paired plus homeo domain	2	92	5100	116427	0.0212766	0.041966	-1.01079	0.442621	0.894595
MA1114.1	PBX3	Homeo domain factors	TALE-type homeo domain factors	34	60	39557	81970	0.361702	0.3255	0.231715	0.443119	0.894595
MA0883.1	Dmbx1	Homeo domain factors	Paired-related HD factors	9	85	9434	112093	0.0957447	0.0776288	0.331212	0.443405	0.894595
MA0084.1	SRY	High-mobility group (HMG) domain factors	SOX-related factors	15	79	16039	105488	0.159574	0.131979	0.320529	0.444337	0.894595
MA0819.1	CLOCK	Basic helix-loop-helix factors (bHLH)	PAS domain factors	5	89	9611	111916	0.0531915	0.0790853	-0.612277	0.44599	0.894595
MA1145.1	FOSL2::JUND	Basic leucine zipper factors (bZIP)::Basic leucine zipper factors (bZIP)	Fos-related::Jun-related	5	89	9725	111802	0.0531915	0.0800234	-0.630764	0.446305	0.894595
MA0827.1	OLIG3	Basic helix-loop-helix factors (bHLH)	Tal-related	5	89	9754	111773	0.0531915	0.080262	-0.635435	0.446467	0.894595
MA1133.1	JUN::JUNB	Basic leucine zipper factors (bZIP)::Basic leucine zipper factors (bZIP)	Jun-related::Jun-related	5	89	10076	111451	0.0531915	0.0829116	-0.686326	0.450417	0.894595
MA1121.1	TEAD2	TEA domain factors	TEF-1-related factors	23	71	26057	95470	0.244681	0.214413	0.247215	0.452625	0.894595
MA0791.1	POU4F3	Homeo domain factors	POU domain factors	10	84	16666	104861	0.106383	0.137138	-0.416887	0.454938	0.894595
MA0816.1	Ascl2	Basic helix-loop-helix factors (bHLH)	MyoDASC-related factors	31	63	45181	76346	0.329787	0.371777	-0.266296	0.455222	0.894595
MA0595.1	SREBF1	Basic helix-loop-helix factors (bHLH)	bHLH-ZIP	24	70	26898	94629	0.255319	0.221334	0.270476	0.455392	0.894595
MA0836.1	CEBPD	Basic leucine zipper factors (bZIP)	CEBP-related	6	88	5727	115800	0.0638298	0.0471253	0.463223	0.457473	0.894595
MA0155.1	INSM1	C2H2 zinc finger factors	Factors with multiple dispersed zinc fingers	32	62	46534	74993	0.340426	0.382911	-0.265676	0.457712	0.894595
MA0466.2	CEBPB	Basic leucine zipper factors (bZIP)	CEBP-related	6	88	5767	115760	0.0638298	0.0474545	0.452684	0.459228	0.894595
MA0673.1	NKX2-8	Homeo domain factors	NK	16	78	17363	104164	0.170213	0.142874	0.299353	0.459809	0.894595
MA0040.1	Foxq1	Fork headwinged helix factors	FOX	16	78	17610	103917	0.170213	0.144906	0.275545	0.4642	0.896181
MA0095.2	YY1	C2H2 zinc finger factors	More than 3 adjacent zinc fingers	25	69	28388	93139	0.265957	0.233594	0.249473	0.464706	0.896181
MA0493.1	Klf1	C2H2 zinc finger factors	Three-zinc finger Kruppel-related	36	58	51671	69856	0.382979	0.425181	-0.253014	0.465325	0.896181
MA0868.1	SOX8	High-mobility group (HMG) domain factors	SOX-related factors	16	78	17752	103775	0.170213	0.146075	0.261983	0.467316	0.896996
MA0152.1	NFATC2	Rel homology region (RHR) factors	NFAT-related factors	26	68	29451	92076	0.276596	0.242341	0.257525	0.469704	0.897205
MA0877.1	Barhl1	Homeo domain factors	NK	6	88	10923	110604	0.0638298	0.0898813	-0.534452	0.471811	0.897205
MA0681.1	Phox2b	Homeo domain factors	Paired-related HD factors	6	88	11042	110485	0.0638298	0.0908605	-0.551642	0.472131	0.897205
MA0643.1	Esrrg	Nuclear receptors with C4 zinc fingers	Steroid hormone receptors (NR3)	17	77	19064	102463	0.180851	0.15687	0.246826	0.480597	0.90099
MA0766.1	GATA5	Other C4 zinc finger-type factors	C4-GATA-related	11	83	11636	109891	0.117021	0.0957483	0.323794	0.480821	0.90099
MA0805.1	TBX1	T-Box factors	TBX1-related factors	17	77	19084	102443	0.180851	0.157035	0.245031	0.481041	0.90099
MA0806.1	TBX4	T-Box factors	TBX2-related factors	17	77	19084	102443	0.180851	0.157035	0.245031	0.481041	0.90099
MA0689.1	TBX20	T-Box factors	TBX1-related factors	12	82	19579	101948	0.12766	0.161108	-0.392131	0.481998	0.90099
MA0724.1	VENTX	Homeo domain factors	NK	3	91	6647	114880	0.0319149	0.0546957	-0.811574	0.492642	0.912856
MA0046.2	HNF1A	Homeo domain factors	POU domain factors	7	87	12146	109381	0.0744681	0.0999449	-0.464742	0.493821	0.912856
MA0914.1	ISL2	Homeo domain factors	HD-LIM	7	87	12429	109098	0.0744681	0.102274	-0.501722	0.494503	0.912856
MA0090.2	TEAD1	TEA domain factors	TEF-1-related factors	19	75	21080	100447	0.202128	0.173459	0.27156	0.49473	0.912856
MA0861.1	TP73	p53 domain factors	p53-related factors	12	82	12772	108755	0.12766	0.105096	0.317432	0.498577	0.916996
MA1141.1	FOS::JUND	Basic leucine zipper factors (bZIP)::Basic leucine zipper factors (bZIP)	Fos-related::Jun-related	14	80	21975	99552	0.148936	0.180824	-0.334982	0.502978	0.922126
MA0776.1	MYBL1	Tryptophan cluster factors	MybSANT domain factors	3	91	3037	118490	0.0319149	0.0249903	0.363137	0.510777	0.929299
MA0707.1	MNX1	Homeo domain factors	HOX	8	86	13476	108051	0.0851064	0.110889	-0.423	0.512713	0.929299
MA0018.3	CREB1	Basic leucine zipper factors (bZIP)	CREB-related factors	8	86	13453	108074	0.0851064	0.1107	-0.420227	0.512741	0.929299
MA0624.1	NFATC1	Rel homology region (RHR) factors	NFAT-related factors	15	79	23568	97959	0.159574	0.193932	-0.341536	0.513389	0.929299
MA0807.1	TBX5	T-Box factors	TBX2-related factors	21	73	24110	97417	0.223404	0.198392	0.217081	0.519179	0.934606
MA1154.1	ZNF282	C2H2 zinc finger factors	More than 3 adjacent zinc fingers	21	73	24171	97356	0.223404	0.198894	0.21253	0.520125	0.934606
MA0143.3	Sox2	High-mobility group (HMG) domain factors	SOX-related factors	22	72	25125	96402	0.234043	0.206744	0.229492	0.523997	0.934606
MA0517.1	STAT1::STAT2	STAT domain factors::STAT domain factors	STAT factors::STAT factors	38	56	45354	76173	0.404255	0.373201	0.188615	0.52439	0.934606
MA0508.2	PRDM1	C2H2 zinc finger factors	More than 3 adjacent zinc fingers	22	72	25297	96230	0.234043	0.20816	0.217069	0.525936	0.934606
MA0889.1	GBX1	Homeo domain factors	HOX	4	90	7701	113826	0.0425532	0.0633686	-0.606239	0.527322	0.934606
MA1143.1	FOSL1::JUND	Basic leucine zipper factors (bZIP)::Basic leucine zipper factors (bZIP)	Fos-related::Jun-related	4	90	7926	113601	0.0425532	0.0652201	-0.650647	0.528535	0.934606
MA0772.1	IRF7	Tryptophan cluster factors	Interferon-regulatory factors	17	77	26093	95434	0.180851	0.214709	-0.308477	0.529392	0.934606
MA0521.1	Tcf12	Basic helix-loop-helix factors (bHLH)	E2A	36	58	50531	70996	0.382979	0.415801	-0.197442	0.532295	0.93504
MA0613.1	FOXG1	Fork headwinged helix factors	FOX	14	80	15358	106169	0.148936	0.126375	0.274723	0.532907	0.93504
MA0656.1	JDP2	Basic leucine zipper factors (bZIP)	Fos-related	8	86	8382	113145	0.0851064	0.0689723	0.328465	0.537501	0.940215
MA0900.1	HOXA2	Homeo domain factors	HOX	8	86	8452	113075	0.0851064	0.0695483	0.315574	0.539567	0.940953
MA1105.1	GRHL2	Grainyhead domain factors	Grainyhead-related factors	10	84	16033	105494	0.106383	0.13193	-0.352342	0.543819	0.945485
MA0792.1	POU5F1B	Homeo domain factors	POU domain factors	15	79	16768	104759	0.159574	0.137978	0.246383	0.548589	0.950888
MA0638.1	CREB3	Basic leucine zipper factors (bZIP)	CREB-related factors	8	86	8803	112724	0.0851064	0.0724366	0.252387	0.552411	0.95462
MA0794.1	PROX1	Homeo domain factors	HD-PROS factors	5	89	9047	112480	0.0531915	0.0744444	-0.517758	0.556345	0.955374
MA0467.1	Crx	Homeo domain factors	Paired-related HD factors	11	83	17460	104067	0.117021	0.143672	-0.340217	0.556695	0.955374
MA0710.1	NOTO	Homeo domain factors	NK	5	89	9478	112049	0.0531915	0.0779909	-0.590454	0.560474	0.955374
MA0627.1	Pou2f3	Homeo domain factors	POU domain factors	16	78	18023	103504	0.170213	0.148304	0.236346	0.560561	0.955374
MA0698.1	ZBTB18	C2H2 zinc finger factors	More than 3 adjacent zinc fingers	23	71	33611	87916	0.244681	0.276572	-0.238984	0.564445	0.955374
MA0646.1	GCM1	GCM domain factors	GCM	12	82	18575	102952	0.12766	0.152847	-0.302049	0.568352	0.955374
MA0592.2	Esrra	Nuclear receptors with C4 zinc fingers	Steroid hormone receptors (NR3)	17	77	19504	102023	0.180851	0.160491	0.207688	0.574201	0.955374
MA0666.1	MSX1	Homeo domain factors	NK	9	85	10107	111420	0.0957447	0.0831667	0.223113	0.577336	0.955374
MA0108.2	TBP	TATA-binding proteins	TBP-related factors	9	85	10171	111356	0.0957447	0.0836933	0.213177	0.579667	0.955374
MA0885.1	Dlx2	Homeo domain factors	NK	6	88	10367	111160	0.0638298	0.0853061	-0.45195	0.580018	0.955374
MA0892.1	GSX1	Homeo domain factors	HOX	6	88	10545	110982	0.0638298	0.0867708	-0.47883	0.580902	0.955374
MA0686.1	SPDEF	Tryptophan cluster factors	Ets-related	6	88	10788	110739	0.0638298	0.0887704	-0.514746	0.58363	0.955374
MA0615.1	Gmeb1	SAND domain factors	GMEB	2	92	4706	116821	0.0212766	0.0387239	-0.889912	0.58976	0.955374
MA0516.1	SP2	C2H2 zinc finger factors	Three-zinc finger Kruppel-related	56	38	76138	45389	0.595745	0.626511	-0.186839	0.594003	0.955374
MA0160.1	NR4A2	Nuclear receptors with C4 zinc fingers	NGFI-B-related receptors (NR4)	19	75	22290	99237	0.202128	0.183416	0.17363	0.595904	0.955374
MA0653.1	IRF9	Tryptophan cluster factors	Interferon-regulatory factors	19	75	22336	99191	0.202128	0.183795	0.169986	0.596639	0.955374
MA0504.1	NR2C2	Nuclear receptors with C4 zinc fingers	RXR-related receptors (NR2)	39	55	47023	74504	0.414894	0.386935	0.167989	0.59714	0.955374
MA0070.1	PBX1	Homeo domain factors	TALE-type homeo domain factors	10	84	11449	110078	0.106383	0.0942095	0.194837	0.599253	0.955374
MA0629.1	Rhox11	Homeo domain factors	Paired-related HD factors	7	87	11541	109986	0.0744681	0.0949666	-0.383162	0.599709	0.955374
MA0864.1	E2F2	Fork headwinged helix factors	E2F	5	89	5112	116415	0.0531915	0.0420647	0.355434	0.600523	0.955374
MA0715.1	PROP1	Homeo domain factors	Paired-related HD factors	7	87	11864	109663	0.0744681	0.0976244	-0.427124	0.600644	0.955374
MA0779.1	PAX1	Paired box factors	Paired domain only	7	87	11941	109586	0.0744681	0.098258	-0.437474	0.601272	0.955374
MA0639.1	DBP	Basic leucine zipper factors (bZIP)	CEBP-related	5	89	5153	116374	0.0531915	0.0424021	0.343402	0.602086	0.955374
MA1115.1	POU5F1	Homeo domain factors	POU domain factors	20	74	23571	97956	0.212766	0.193957	0.16763	0.603705	0.955374
MA0136.2	ELF5	Tryptophan cluster factors	Ets-related	16	78	23862	97665	0.170213	0.196351	-0.252272	0.604134	0.955374
MA0773.1	MEF2D	MADS box factors	Regulators of differentiation	16	78	23726	97801	0.170213	0.195232	-0.242019	0.604319	0.955374
MA0146.2	Zfx	C2H2 zinc finger factors	More than 3 adjacent zinc fingers	42	52	58000	63527	0.446809	0.47726	-0.176801	0.605977	0.955374
MA0843.1	TEF	Basic leucine zipper factors (bZIP)	CEBP-related	5	89	5355	116172	0.0531915	0.0440643	0.285422	0.610901	0.955374
MA1420.1	IRF5	Tryptophan cluster factors	Interferon-regulatory factors	11	83	12642	108885	0.117021	0.104026	0.190886	0.613698	0.955374
MA0106.3	TP53	p53 domain factors	p53-related factors	11	83	12721	108806	0.117021	0.104676	0.180846	0.615783	0.955374
MA0611.1	Dux	Homeo domain factors	Paired-related HD factors	8	86	12939	108588	0.0851064	0.10647	-0.357154	0.616458	0.955374
MA0031.1	FOXD1	Fork headwinged helix factors	FOX	8	86	13065	108462	0.0851064	0.107507	-0.372816	0.616786	0.955374
MA0042.2	FOXI1	Fork headwinged helix factors	FOX	8	86	13083	108444	0.0851064	0.107655	-0.375042	0.616863	0.955374
MA0033.2	FOXL1	Fork headwinged helix factors	FOX	8	86	13083	108444	0.0851064	0.107655	-0.375042	0.616863	0.955374
MA0847.1	FOXD2	Fork headwinged helix factors	FOX	8	86	13083	108444	0.0851064	0.107655	-0.375042	0.616863	0.955374
MA0848.1	FOXO4	Fork headwinged helix factors	FOX	8	86	13083	108444	0.0851064	0.107655	-0.375042	0.616863	0.955374
MA0849.1	FOXO6	Fork headwinged helix factors	FOX	8	86	13083	108444	0.0851064	0.107655	-0.375042	0.616863	0.955374
MA0850.1	FOXP3	Fork headwinged helix factors	FOX	8	86	13083	108444	0.0851064	0.107655	-0.375042	0.616863	0.955374
MA0528.1	ZNF263	C2H2 zinc finger factors	More than 3 adjacent zinc fingers	71	23	94651	26876	0.755319	0.778847	-0.190146	0.618703	0.955374
MA0593.1	FOXP2	Fork headwinged helix factors	FOX	23	71	27115	94412	0.244681	0.223119	0.173722	0.620322	0.955374
MA0088.2	ZNF143	C2H2 zinc finger factors	More than 3 adjacent zinc fingers	23	71	27227	94300	0.244681	0.224041	0.166061	0.621327	0.955374
MA0107.1	RELA	Rel homology region (RHR) factors	NF-kappaB-related factors	19	75	27520	94007	0.202128	0.226452	-0.2086	0.623956	0.956845
MA0159.1	RARA::RXRA	Nuclear receptors with C4 zinc fingers::Nuclear receptors with C4 zinc fingers	Thyroid hormone receptor-related factors (NR1)::RXR-related receptors (NR2)	24	70	28740	92787	0.255319	0.236491	0.146562	0.629376	0.9594
MA0911.1	Hoxa11	Homeo domain factors	HOX	3	91	5727	115800	0.0319149	0.0471253	-0.585128	0.630911	0.9594
MA0122.2	NKX3-2	Homeo domain factors	NK	9	85	14548	106979	0.0957447	0.11971	-0.361019	0.632218	0.9594
MA1155.1	ZSCAN4	C2H2 zinc finger factors	More than 3 adjacent zinc fingers	25	69	29883	91644	0.265957	0.245896	0.152066	0.632989	0.9594
MA0606.1	NFAT5	Rel homology region (RHR) factors	NFAT-related factors	21	73	30331	91196	0.223404	0.249582	-0.209325	0.634009	0.9594
MA0043.2	HLF	Basic leucine zipper factors (bZIP)	CEBP-related	6	88	6365	115162	0.0638298	0.0523752	0.302887	0.638567	0.963748
MA0866.1	SOX21	High-mobility group (HMG) domain factors	SOX-related factors	10	84	15594	105933	0.106383	0.128317	-0.306287	0.643564	0.966522
MA1123.1	TWIST1	Basic helix-loop-helix factors (bHLH)	Tal-related	28	66	33359	88168	0.297872	0.274499	0.165124	0.643785	0.966522
MA0738.1	HIC2	C2H2 zinc finger factors	Factors with multiple dispersed zinc fingers	29	65	34977	86550	0.308511	0.287813	0.142731	0.649586	0.969293
MA0497.1	MEF2C	MADS box factors	Regulators of differentiation	25	69	35259	86268	0.265957	0.290133	-0.173829	0.650803	0.969293
MA0745.1	SNAI2	C2H2 zinc finger factors	More than 3 adjacent zinc fingers	26	68	36675	84852	0.276596	0.301785	-0.176865	0.653867	0.969293
MA0818.1	BHLHE22	Basic helix-loop-helix factors (bHLH)	Tal-related	6	88	6883	114644	0.0638298	0.0566376	0.183508	0.65644	0.969293
MA0878.1	CDX1	Homeo domain factors	HOX	15	79	17416	104111	0.159574	0.14331	0.182707	0.657981	0.969293
MA0840.1	Creb5	Basic leucine zipper factors (bZIP)	CREB-related factors	4	90	7191	114336	0.0425532	0.059172	-0.500926	0.662034	0.969293
MA0598.2	EHF	Tryptophan cluster factors	Ets-related	12	82	18273	103254	0.12766	0.150362	-0.274175	0.664641	0.969293
MA1103.1	FOXK2	Fork headwinged helix factors	FOX	12	82	18280	103247	0.12766	0.150419	-0.274825	0.664663	0.969293
MA0749.1	ZBED1	C2H2 zinc finger factors	BED zinc finger factors	2	92	1949	119578	0.0212766	0.0160376	0.415506	0.664807	0.969293
MA0869.1	Sox11	High-mobility group (HMG) domain factors	SOX-related factors	13	81	19345	102182	0.138298	0.159183	-0.2383	0.673101	0.969293
MA0865.1	E2F8	Fork headwinged helix factors	E2F	13	81	19230	102297	0.138298	0.158236	-0.228075	0.673243	0.969293
MA0867.1	SOX4	High-mobility group (HMG) domain factors	SOX-related factors	13	81	19566	101961	0.138298	0.161001	-0.257811	0.673375	0.969293
MA0690.1	TBX21	T-Box factors	TBrain-related factors	13	81	19634	101893	0.138298	0.161561	-0.263779	0.673601	0.969293
MA0688.1	TBX2	T-Box factors	TBX2-related factors	13	81	19667	101860	0.138298	0.161832	-0.266669	0.673735	0.969293
MA0731.1	BCL6B	C2H2 zinc finger factors	More than 3 adjacent zinc fingers	17	77	19797	101730	0.180851	0.162902	0.182019	0.674438	0.969293
MA0065.2	Pparg::Rxra	Nuclear receptors with C4 zinc fingers::Nuclear receptors with C4 zinc fingers	Thyroid hormone receptor-related factors (NR1)::RXR-related receptors (NR2)	43	51	53034	68493	0.457447	0.436397	0.122877	0.678939	0.97038
MA0139.1	CTCF	C2H2 zinc finger factors	More than 3 adjacent zinc fingers	44	50	59611	61916	0.468085	0.490517	-0.129659	0.68101	0.97038
MA0894.1	HESX1	Homeo domain factors	Paired-related HD factors	5	89	8461	113066	0.0531915	0.0696224	-0.413634	0.685673	0.97038
MA0705.1	Lhx8	Homeo domain factors	HD-LIM	5	89	8507	113020	0.0531915	0.0700009	-0.422044	0.685812	0.97038
MA0477.1	FOSL1	Basic leucine zipper factors (bZIP)	Fos-related	15	79	21992	99535	0.159574	0.180964	-0.218663	0.688073	0.97038
MA0462.1	BATF::JUN	Basic leucine zipper factors (bZIP)::Basic leucine zipper factors (bZIP)	B-ATF-related factors::Jun-related	15	79	21751	99776	0.159574	0.178981	-0.199277	0.688347	0.97038
MA0722.1	VAX1	Homeo domain factors	NK	5	89	8837	112690	0.0531915	0.0727164	-0.481178	0.688565	0.97038
MA0009.2	TBXT	T-Box factors	Brachyury-related factors	8	86	8932	112595	0.0851064	0.0734981	0.229748	0.689948	0.97038
MA0662.1	MIXL1	Homeo domain factors	Paired-related HD factors	8	86	9060	112467	0.0851064	0.0745513	0.207579	0.692122	0.97038
MA0699.1	LBX2	Homeo domain factors	NK	8	86	9062	112465	0.0851064	0.0745678	0.207235	0.69216	0.97038
MA0148.3	FOXA1	Fork headwinged helix factors	FOX	16	78	23152	98375	0.170213	0.190509	-0.198245	0.694565	0.970607
MA0677.1	Nr2f6	Nuclear receptors with C4 zinc fingers	RXR-related receptors (NR2)	20	74	23703	97824	0.212766	0.195043	0.157625	0.695715	0.970607
MA0670.1	NFIA	SMADNF-1 DNA-binding domain factors	Nuclear factor 1	22	72	26325	95202	0.234043	0.216619	0.144088	0.706946	0.982499
MA0891.1	GSC2	Homeo domain factors	Paired-related HD factors	9	85	10191	111336	0.0957447	0.0838579	0.210084	0.707674	0.982499
MA0691.1	TFAP4	Basic helix-loop-helix factors (bHLH)	bHLH-ZIP	19	75	27315	94212	0.202128	0.224765	-0.194671	0.710739	0.984365
MA0623.1	Neurog1	Basic helix-loop-helix factors (bHLH)	Tal-related	9	85	10640	110887	0.0957447	0.0875526	0.142023	0.715176	0.986811
MA0737.1	GLIS3	C2H2 zinc finger factors	More than 3 adjacent zinc fingers	24	70	28859	92668	0.255319	0.23747	0.138747	0.715956	0.986811
MA0896.1	Hmx1	Homeo domain factors	NK	7	87	11032	110495	0.0744681	0.0907782	-0.311407	0.72003	0.987207
MA0519.1	Stat5a::Stat5b	STAT domain factors::STAT domain factors	STAT factors::STAT factors	25	69	30352	91175	0.265957	0.249755	0.122191	0.720998	0.987207
MA0634.1	ALX3	Homeo domain factors	Paired-related HD factors	7	87	11346	110181	0.0744681	0.093362	-0.356013	0.72142	0.987207
MA0739.1	Hic1	C2H2 zinc finger factors	Factors with multiple dispersed zinc fingers	26	68	31953	89574	0.276596	0.262929	0.100114	0.726805	0.992201
MA0752.1	ZNF410	C2H2 zinc finger factors	More than 3 adjacent zinc fingers	8	86	12482	109045	0.0851064	0.10271	-0.299308	0.733372	0.996198
MA0781.1	PAX9	Paired box factors	Paired domain only	8	86	12558	108969	0.0851064	0.103335	-0.309075	0.733713	0.996198
MA0893.1	GSX2	Homeo domain factors	HOX	8	86	12743	108784	0.0851064	0.104857	-0.332522	0.734958	0.996198
MA0793.1	POU6F2	Homeo domain factors	POU domain factors	11	83	13021	108506	0.117021	0.107145	0.143215	0.737927	0.997859
MA0048.2	NHLH1	Basic helix-loop-helix factors (bHLH)	Tal-related	28	66	38692	82835	0.297872	0.318382	-0.138829	0.740151	0.998505
MA0758.1	E2F7	Fork headwinged helix factors	E2F	9	85	13556	107971	0.0957447	0.111547	-0.245868	0.743996	1
MA0810.1	TFAP2A	Basic helix-span-helix factors (bHSH)	AP-2	32	62	43944	77583	0.340426	0.361599	-0.134136	0.747593	1
MA0871.1	TFEC	Basic helix-loop-helix factors (bHLH)	bHLH-ZIP	12	82	14372	107155	0.12766	0.118262	0.12582	0.749047	1
MA0614.1	Foxj2	Fork headwinged helix factors	FOX	12	82	14633	106894	0.12766	0.120409	0.0963219	0.75266	1
MA0692.1	TFEB	Basic helix-loop-helix factors (bHLH)	bHLH-ZIP	10	84	14752	106775	0.106383	0.121389	-0.214841	0.753594	1
MA0019.1	Ddit3::Cebpa	Basic leucine zipper factors (bZIP)::Basic leucine zipper factors (bZIP)	CEBP-related::CEBP-related	10	84	15281	106246	0.106383	0.125742	-0.272759	0.754775	1
MA1151.1	RORC	Nuclear receptors with C4 zinc fingers	Thyroid hormone receptor-related factors (NR1)	13	81	15340	106187	0.138298	0.126227	0.151782	0.755164	1
MA0163.1	PLAG1	C2H2 zinc finger factors	More than 3 adjacent zinc fingers	44	50	59092	62435	0.468085	0.486246	-0.105075	0.757479	1
MA0469.2	E2F3	Fork headwinged helix factors	E2F	3	91	3612	117915	0.0319149	0.0297218	0.105944	0.759425	1
MA0771.1	HSF4	Heat shock factors	HSF factors	11	83	16540	104987	0.117021	0.136101	-0.249405	0.762779	1
MA0789.1	POU3F4	Homeo domain factors	POU domain factors	14	80	16699	104828	0.148936	0.13741	0.135659	0.763728	1
MA0683.1	POU4F2	Homeo domain factors	POU domain factors	14	80	17007	104520	0.148936	0.139944	0.105033	0.766382	1
MA0754.1	CUX1	Homeo domain factors	HD-CUT	2	92	3838	117689	0.0212766	0.0315815	-0.585081	0.772254	1
MA0800.1	EOMES	T-Box factors	TBrain-related factors	13	81	19040	102487	0.138298	0.156673	-0.211067	0.776105	1
MA0481.2	FOXP1	Fork headwinged helix factors	FOX	14	80	20339	101188	0.148936	0.167362	-0.199854	0.781881	1
MA0117.2	Mafb	Basic leucine zipper factors (bZIP)	Maf-related	17	77	20665	100862	0.180851	0.170045	0.10782	0.783381	1
MA0488.1	JUN	Basic leucine zipper factors (bZIP)	Jun-related	17	77	20826	100701	0.180851	0.171369	0.0943143	0.784479	1
MA0782.1	PKNOX1	Homeo domain factors	TALE-type homeo domain factors	15	79	21401	100126	0.159574	0.176101	-0.170816	0.786652	1
MA0047.2	Foxa2	Fork headwinged helix factors	FOX	16	78	22416	99111	0.170213	0.184453	-0.140863	0.791504	1
MA0093.2	USF1	Basic helix-loop-helix factors (bHLH)	bHLH-ZIP	20	74	24298	97229	0.212766	0.199939	0.113042	0.796192	1
MA0052.3	MEF2A	MADS box factors	Regulators of differentiation	18	76	25480	96047	0.191489	0.209665	-0.163625	0.799747	1
MA0651.1	HOXC11	Homeo domain factors	HOX	3	91	5451	116076	0.0319149	0.0448542	-0.510432	0.80144	1
MA0080.4	SPI1	Tryptophan cluster factors	Ets-related	25	69	30763	90764	0.265957	0.253137	0.0962642	0.812383	1
MA1418.1	IRF3	Tryptophan cluster factors	Interferon-regulatory factors	26	68	31989	89538	0.276596	0.263225	0.0979089	0.814723	1
MA0081.1	SPIB	Tryptophan cluster factors	Ets-related	27	67	33328	88199	0.287234	0.274244	0.0928322	0.817104	1
MA1139.1	FOSL2::JUNB	Basic leucine zipper factors (bZIP)::Basic leucine zipper factors (bZIP)	Fos-related::Jun-related	4	90	6450	115077	0.0425532	0.0530746	-0.334702	0.819613	1
MA0834.1	ATF7	Basic leucine zipper factors (bZIP)	Jun-related	4	90	6758	114769	0.0425532	0.055609	-0.405869	0.82056	1
MA0484.1	HNF4G	Nuclear receptors with C4 zinc fingers	RXR-related receptors (NR2)	29	65	36341	85186	0.308511	0.299036	0.0646339	0.822472	1
MA0144.2	STAT3	STAT domain factors	STAT factors	30	64	37413	84114	0.319149	0.307858	0.0756951	0.823437	1
MA0811.1	TFAP2B	Basic helix-span-helix factors (bHSH)	AP-2	31	63	38489	83038	0.329787	0.316712	0.0862397	0.824555	1
MA0888.1	EVX2	Homeo domain factors	HOX	6	88	7315	114212	0.0638298	0.0601924	0.0902836	0.827099	1
MA0887.1	EVX1	Homeo domain factors	HOX	6	88	7372	114155	0.0638298	0.0606614	0.0783566	0.828068	1
MA0844.1	XBP1	Basic leucine zipper factors (bZIP)	XBP-1-related factors	6	88	7459	114068	0.0638298	0.0613773	0.0603188	0.829642	1
MA0817.1	BHLHE23	Basic helix-loop-helix factors (bHLH)	Tal-related	6	88	7534	113993	0.0638298	0.0619945	0.0449278	0.831087	1
MA0149.1	EWSR1-FLI1	Tryptophan cluster factors	Ets-related	60	34	75631	45896	0.638298	0.622339	0.0988284	0.831617	1
MA0826.1	OLIG1	Basic helix-loop-helix factors (bHLH)	Tal-related	5	89	7696	113831	0.0531915	0.0633275	-0.267172	0.833971	1
MA0647.1	GRHL1	Grainyhead domain factors	Grainyhead-related factors	5	89	7821	113706	0.0531915	0.0643561	-0.292003	0.833973	1
MA0723.1	VAX2	Homeo domain factors	NK	5	89	7826	113701	0.0531915	0.0643972	-0.292988	0.833978	1
MA0067.1	Pax2	Paired box factors	Paired domain only	5	89	7924	113603	0.0531915	0.0652036	-0.312188	0.834178	1
MA0879.1	Dlx1	Homeo domain factors	NK	5	89	8082	113445	0.0531915	0.0665037	-0.342682	0.834841	1
MA0471.1	E2F6	Fork headwinged helix factors	E2F	42	52	56010	65517	0.446809	0.460885	-0.0819576	0.836308	1
MA0073.1	RREB1	C2H2 zinc finger factors	Factors with multiple dispersed zinc fingers	44	50	58258	63269	0.468085	0.479383	-0.0653981	0.837226	1
MA0902.1	HOXB2	Homeo domain factors	HOX	7	87	8657	112870	0.0744681	0.0712352	0.0690859	0.840507	1
MA0644.1	ESX1	Homeo domain factors	Paired-related HD factors	6	88	9132	112395	0.0638298	0.0751438	-0.252978	0.845117	1
MA0718.1	RAX	Homeo domain factors	Paired-related HD factors	6	88	9181	112346	0.0638298	0.075547	-0.261329	0.845191	1
MA0153.2	HNF1B	Homeo domain factors	POU domain factors	6	88	9186	112341	0.0638298	0.0755881	-0.262178	0.8452	1
MA0890.1	GBX2	Homeo domain factors	HOX	6	88	9321	112206	0.0638298	0.076699	-0.284964	0.845583	1
MA0904.1	Hoxb5	Homeo domain factors	HOX	8	86	9659	111868	0.0851064	0.0794803	0.107561	0.847609	1
MA0069.1	PAX6	Paired box factors	Paired plus homeo domain	8	86	10160	111367	0.0851064	0.0836028	0.0280887	0.853079	1
MA0831.2	TFE3	Basic helix-loop-helix factors (bHLH)	bHLH-ZIP	7	87	10673	110854	0.0744681	0.0878241	-0.258987	0.854655	1
MA0618.1	LBX1	Homeo domain factors	NK	7	87	10729	110798	0.0744681	0.0882849	-0.267267	0.854886	1
MA0164.1	Nr2e3	Nuclear receptors with C4 zinc fingers	RXR-related receptors (NR2)	7	87	10824	110703	0.0744681	0.0890666	-0.281226	0.855355	1
MA0708.1	MSX2	Homeo domain factors	NK	9	85	10887	110640	0.0957447	0.089585	0.10577	0.855732	1
MA0709.1	Msx3	Homeo domain factors	NK	9	85	10887	110640	0.0957447	0.089585	0.10577	0.855732	1
MA0912.1	Hoxd3	Homeo domain factors	HOX	9	85	11362	110165	0.0957447	0.0934936	0.0379178	0.859771	1
MA0498.2	MEIS1	Homeo domain factors	TALE-type homeo domain factors	8	86	11620	109907	0.0851064	0.0956166	-0.184679	0.861405	1
MA0511.2	RUNX2	Runt domain factors	Runt-related factors	8	86	12072	109455	0.0851064	0.099336	-0.245693	0.862347	1
MA0485.1	Hoxc9	Homeo domain factors	HOX	9	85	13211	108316	0.0957447	0.108708	-0.204059	0.867962	1
MA1104.1	GATA6	Other C4 zinc finger-type factors	C4-GATA-related	10	84	14563	106964	0.106383	0.119833	-0.193678	0.873371	1
MA0124.2	Nkx3-1	Homeo domain factors	NK	10	84	14696	106831	0.106383	0.120928	-0.208595	0.873783	1
MA0072.1	RORA	Nuclear receptors with C4 zinc fingers	Thyroid hormone receptor-related factors (NR1)	12	82	14702	106825	0.12766	0.120977	0.0885997	0.873812	1
MA0684.1	RUNX3	Runt domain factors	Runt-related factors	12	82	15153	106374	0.12766	0.124688	0.038886	0.876163	1
MA0502.1	NFYB	Heteromeric CCAAT-binding factors	Heteromeric CCAAT-binding	11	83	15354	106173	0.117021	0.126342	-0.125896	0.877609	1
MA0770.1	HSF2	Heat shock factors	HSF factors	12	82	17135	104392	0.12766	0.140997	-0.16564	0.881872	1
MA0899.1	HOXA10	Homeo domain factors	HOX	14	80	17560	103967	0.148936	0.144495	0.0511953	0.88328	1
MA0492.1	JUND	Basic leucine zipper factors (bZIP)	Jun-related	14	80	17697	103830	0.148936	0.145622	0.0380777	0.883952	1
MA1112.1	NR4A1	Nuclear receptors with C4 zinc fingers	NGFI-B-related receptors (NR4)	14	80	17792	103735	0.148936	0.146404	0.0290314	0.884479	1
MA0667.1	MYF6	Basic helix-loop-helix factors (bHLH)	MyoDASC-related factors	13	81	18045	103482	0.138298	0.148486	-0.119729	0.885093	1
MA0913.1	Hoxd9	Homeo domain factors	HOX	13	81	18166	103361	0.138298	0.149481	-0.131065	0.885096	1
MA0607.1	Bhlha15	Basic helix-loop-helix factors (bHLH)	Tal-related	15	79	18652	102875	0.159574	0.15348	0.0666113	0.88595	1
MA0650.1	HOXA13	Homeo domain factors	HOX	15	79	18758	102769	0.159574	0.154353	0.0569455	0.886307	1
MA0787.1	POU3F2	Homeo domain factors	POU domain factors	15	79	18937	102590	0.159574	0.155825	0.0407247	0.887044	1
MA0802.1	TBR1	T-Box factors	TBrain-related factors	14	80	19382	102145	0.148936	0.159487	-0.116777	0.888238	1
MA0786.1	POU3F1	Homeo domain factors	POU domain factors	14	80	19432	102095	0.148936	0.159899	-0.121203	0.888241	1
MA0526.2	USF2	Basic helix-loop-helix factors (bHLH)	bHLH-ZIP	14	80	19295	102232	0.148936	0.158771	-0.109054	0.888263	1
MA0845.1	FOXB1	Fork headwinged helix factors	FOX	14	80	19654	101873	0.148936	0.161725	-0.140648	0.888416	1
MA0796.1	TGIF1	Homeo domain factors	TALE-type homeo domain factors	16	78	19897	101630	0.170213	0.163725	0.0673118	0.888904	1
MA0619.1	LIN54	CRC domain		16	78	19979	101548	0.170213	0.1644	0.0602118	0.889134	1
MA0660.1	MEF2B	MADS box factors	Regulators of differentiation	16	78	20107	101420	0.170213	0.165453	0.049176	0.889561	1
MA0645.1	ETV6	Tryptophan cluster factors	Ets-related	16	78	22372	99155	0.170213	0.184091	-0.137384	0.893945	1
MA0778.1	NFKB2	Rel homology region (RHR) factors	NF-kappaB-related factors	18	76	22586	98941	0.191489	0.185852	0.0531427	0.894428	1
MA1124.1	ZNF24	C2H2 zinc finger factors	More than 3 adjacent zinc fingers	17	77	23118	98409	0.180851	0.190229	-0.0895845	0.89594	1
MA0091.1	TAL1::TCF3	Basic helix-loop-helix factors (bHLH)::Basic helix-loop-helix factors (bHLH)	Tal-related::E2A	19	75	23893	97634	0.202128	0.196607	0.0499089	0.896705	1
MA0783.1	PKNOX2	Homeo domain factors	TALE-type homeo domain factors	19	75	25625	95902	0.202128	0.210858	-0.0769175	0.899965	1
MA0092.1	Hand1::Tcf3	Basic helix-loop-helix factors (bHLH)::Basic helix-loop-helix factors (bHLH)	Tal-related::E2A	21	73	26255	95272	0.223404	0.216043	0.0619585	0.900163	1
MA0137.3	STAT1	STAT domain factors	STAT factors	21	73	28656	92871	0.223404	0.235799	-0.101106	0.903249	1
MA0687.1	SPIC	Tryptophan cluster factors	Ets-related	24	70	30231	91296	0.255319	0.24876	0.0502051	0.905023	1
MA0518.1	Stat4	STAT domain factors	STAT factors	26	68	32969	88558	0.276596	0.27129	0.0384906	0.907806	1
MA0463.1	Bcl6	C2H2 zinc finger factors	More than 3 adjacent zinc fingers	25	69	33596	87931	0.265957	0.276449	-0.0765733	0.908302	1
MA0119.1	NFIC::TLX1	SMADNF-1 DNA-binding domain factors::Homeo domain factors	Nuclear factor 1::NK	26	68	35167	86360	0.276596	0.289376	-0.0908808	0.909432	1
MA0524.2	TFAP2C	Basic helix-span-helix factors (bHSH)	AP-2	30	64	37936	83591	0.319149	0.312161	0.0466717	0.911429	1
MA0482.1	Gata4	Other C4 zinc finger-type factors	C4-GATA-related	12	82	16120	105407	0.12766	0.132645	-0.0635481	1	1
MA0591.1	Bach1::Mafk	Basic leucine zipper factors (bZIP)::Basic leucine zipper factors (bZIP)	Jun-related::Maf-related	23	71	30566	90961	0.244681	0.251516	-0.0528939	1	1
MA0640.1	ELF3	Tryptophan cluster factors	Ets-related	15	79	20021	101506	0.159574	0.164745	-0.0549195	1	1
MA0785.1	POU2F1	Homeo domain factors	POU domain factors	14	80	17987	103540	0.148936	0.148008	0.0105889	1	1
MA0788.1	POU3F3	Homeo domain factors	POU domain factors	15	79	19495	102032	0.159574	0.160417	-0.00904468	1	1
MA0795.1	SMAD3	SMADNF-1 DNA-binding domain factors	SMAD factors	5	89	6988	114539	0.0531915	0.0575016	-0.118991	1	1
MA0797.1	TGIF2	Homeo domain factors	TALE-type homeo domain factors	14	80	18934	102593	0.148936	0.155801	-0.0767057	1	1
MA0814.1	TFAP2C	Basic helix-span-helix factors (bHSH)	AP-2	31	63	39688	81839	0.329787	0.326578	0.0210121	1	1
MA0873.1	HOXD12	Homeo domain factors	HOX	3	91	5106	116421	0.0319149	0.0420154	-0.41182	1	1
MA1129.1	FOSL1::JUN	Basic leucine zipper factors (bZIP)::Basic leucine zipper factors (bZIP)	Fos-related::Jun-related	4	90	5729	115798	0.0425532	0.0471418	-0.15467	1	1
MA0038.1	Gfi1	C2H2 zinc finger factors	More than 3 adjacent zinc fingers	18	76	23361	98166	0.191489	0.192229	-0.00688129	1	1
MA0063.1	Nkx2-5	Homeo domain factors	NK	9	85	11514	110013	0.0957447	0.0947444	0.0167483	1	1
MA0074.1	RXRA::VDR	Nuclear receptors with C4 zinc fingers::Nuclear receptors with C4 zinc fingers	RXR-related receptors (NR2)::Thyroid hormone receptor-related factors (NR1)	10	84	12868	108659	0.106383	0.105886	0.00755881	1	1
MA0125.1	Nobox	Homeo domain factors	Paired-related HD factors	7	87	9641	111886	0.0744681	0.0793322	-0.0988879	1	1
MA0158.1	HOXA5	Homeo domain factors	HOX	7	87	8983	112544	0.0744681	0.0739177	0.0115601	1	1
MA0480.1	Foxo1	Fork headwinged helix factors	FOX	23	71	30129	91398	0.244681	0.24792	-0.0251817	1	1
MA0520.1	Stat6	STAT domain factors	STAT factors	19	75	24584	96943	0.202128	0.202292	-0.00147412	1	1
MA0604.1	Atf1	Basic leucine zipper factors (bZIP)	CREB-related factors	4	90	6247	115280	0.0425532	0.0514042	-0.286022	1	1
MA0605.1	Atf3	Basic leucine zipper factors (bZIP)	Fos-related	5	89	7373	114154	0.0531915	0.0606696	-0.201223	1	1
MA0610.1	DMRT3	DM-type intertwined zinc finger factors	DMRT factors	8	86	10764	110763	0.0851064	0.0885729	-0.0630762	1	1
MA0612.1	EMX1	Homeo domain factors	NK	6	88	8527	113000	0.0638298	0.0701655	-0.146332	1	1
MA0630.1	SHOX	Homeo domain factors	Paired-related HD factors	7	87	9139	112388	0.0744681	0.0752014	-0.0152806	1	1
MA0652.1	IRF8	Tryptophan cluster factors	Interferon-regulatory factors	13	81	16952	104575	0.138298	0.139492	-0.0144	1	1
MA0654.1	ISX	Homeo domain factors	Paired-related HD factors	7	87	9139	112388	0.0744681	0.0752014	-0.0152806	1	1
MA0658.1	LHX6	Homeo domain factors	HD-LIM	5	89	6533	114994	0.0531915	0.0537576	-0.0161361	1	1
MA0675.1	NKX6-2	Homeo domain factors	NK	9	85	12371	109156	0.0957447	0.101796	-0.0981141	1	1
MA0678.1	OLIG2	Basic helix-loop-helix factors (bHLH)	Tal-related	6	88	8280	113247	0.0638298	0.068133	-0.100772	1	1
MA0701.1	LHX9	Homeo domain factors	HD-LIM	7	87	9139	112388	0.0744681	0.0752014	-0.0152806	1	1
MA0706.1	MEOX2	Homeo domain factors	HOX	7	87	10003	111524	0.0744681	0.0823109	-0.156746	1	1
MA0716.1	PRRX1	Homeo domain factors	Paired-related HD factors	7	87	9139	112388	0.0744681	0.0752014	-0.0152806	1	1
MA0717.1	RAX2	Homeo domain factors	Paired-related HD factors	7	87	9139	112388	0.0744681	0.0752014	-0.0152806	1	1
MA0720.1	Shox2	Homeo domain factors	Paired-related HD factors	7	87	9139	112388	0.0744681	0.0752014	-0.0152806	1	1
MA0721.1	UNCX	Homeo domain factors	Paired-related HD factors	7	87	9139	112388	0.0744681	0.0752014	-0.0152806	1	1
MA0734.1	GLI2	C2H2 zinc finger factors	More than 3 adjacent zinc fingers	17	77	22672	98855	0.180851	0.186559	-0.0549339	1	1
MA0755.1	CUX2	Homeo domain factors	HD-CUT	2	92	3524	118003	0.0212766	0.0289977	-0.458095	1	1
MA0803.1	TBX15	T-Box factors	TBX1-related factors	18	76	23448	98079	0.191489	0.192945	-0.0135239	1	1
MA0839.1	CREB3L1	Basic leucine zipper factors (bZIP)	CREB-related factors	10	84	13636	107891	0.106383	0.112206	-0.0863132	1	1
MA0032.2	FOXC1	Fork headwinged helix factors	FOX	17	77	22400	99127	0.180851	0.184321	-0.0335488	1	1
MA0525.2	TP63	p53 domain factors	p53-related factors	6	88	7956	113571	0.0638298	0.0654669	-0.0390617	1	1
MA0862.1	GMEB2	SAND domain factors	GMEB	1	93	1652	119875	0.0106383	0.0135937	-0.357983	1	1
MA0024.3	E2F1	Fork headwinged helix factors	E2F	4	90	5553	115974	0.0425532	0.0456935	-0.107463	1	1
MA0870.1	Sox1	High-mobility group (HMG) domain factors	SOX-related factors	9	85	12341	109186	0.0957447	0.101549	-0.0942143	1	1
MA0886.1	EMX2	Homeo domain factors	NK	5	89	6496	115031	0.0531915	0.0534531	-0.00747801	1	1
MA0906.1	HOXC12	Homeo domain factors	HOX	5	89	6669	114858	0.0531915	0.0548767	-0.0475681	1	1
MA0907.1	HOXC13	Homeo domain factors	HOX	8	86	10415	111112	0.0851064	0.0857011	-0.0109848	1	1
MA0908.1	HOXD11	Homeo domain factors	HOX	4	90	5937	115590	0.0425532	0.0488533	-0.208716	1	1
MA0495.2	MAFF	Basic leucine zipper factors (bZIP)	Maf-related	15	79	19588	101939	0.159574	0.161182	-0.0172268	1	1
MA0620.2	MITF	Basic helix-loop-helix factors (bHLH)	bHLH-ZIP	9	85	11601	109926	0.0957447	0.0954603	0.00474573	1	1
MA0100.3	MYB	Tryptophan cluster factors	MybSANT domain factors	15	79	19354	102173	0.159574	0.159257	0.00342019	1	1
MA1120.1	SOX13	High-mobility group (HMG) domain factors	SOX-related factors	15	79	19501	102026	0.159574	0.160466	-0.0095735	1	1
MA1126.1	FOS::JUN	Basic leucine zipper factors (bZIP)::Basic leucine zipper factors (bZIP)	Fos-related::Jun-related	8	86	10520	111007	0.0851064	0.0865651	-0.0268208	1	1
MA1131.1	FOSL2::JUN	Basic leucine zipper factors (bZIP)::Basic leucine zipper factors (bZIP)	Fos-related::Jun-related	8	86	10415	111112	0.0851064	0.0857011	-0.0109848	1	1
MA1136.1	FOSB::JUNB	Basic leucine zipper factors (bZIP)::Basic leucine zipper factors (bZIP)	Fos-related::Jun-related	4	90	6354	115173	0.0425532	0.0522847	-0.311864	1	1
MA1140.1	JUNB	Basic leucine zipper factors (bZIP)	Jun-related	3	91	4917	116610	0.0319149	0.0404601	-0.355064	1	1
MA0693.2	VDR	Nuclear receptors with C4 zinc fingers	Thyroid hormone receptor-related factors (NR1)	15	79	19227	102300	0.159574	0.158212	0.014711	1	1

## Sheet: 3.AD_vs_1.YA_Immature.down
Motif	Motif Name	Class	Family	Hits in list	Unhit in list	Hits in background	Unhit in background	Percent in list	Percent in background	Log2 Odds Ratio	PValue	QValue
MA0506.1	NRF1	Basic leucine zipper factors (bZIP)	Jun-related	19480	47985	27532	93995	0.288742	0.22655	0.470832	1.34562e-194	7.69693e-192
MA0470.1	E2F4	Fork headwinged helix factors	E2F	20190	47275	28741	92786	0.299266	0.236499	0.463309	3.23303e-193	9.24646e-191
MA1122.1	TFDP1	Fork headwinged helix factors	E2F	20532	46933	29482	92045	0.304336	0.242596	0.449728	1.48558e-184	2.83251e-182
MA0732.1	EGR3	C2H2 zinc finger factors	Three-zinc finger Kruppel-related	25713	41752	38698	82829	0.381131	0.318431	0.398494	6.57924e-166	9.40831e-164
MA0162.3	EGR1	C2H2 zinc finger factors	Three-zinc finger Kruppel-related	18365	49100	26276	95251	0.272215	0.216215	0.439177	8.70646e-164	9.96019e-162
MA0131.2	HINFP	C2H2 zinc finger factors	Factors with multiple dispersed zinc fingers	15169	52296	21420	100107	0.224843	0.176257	0.438889	2.16833e-142	2.06714e-140
MA0632.1	Tcfl5	Basic helix-loop-helix factors (bHLH)	PAS domain factors	10136	57329	13384	108143	0.150241	0.110132	0.514518	3.0535e-138	2.49515e-136
MA0527.1	ZBTB33	C2H2 zinc finger factors	Other factors with up to three adjacent zinc fingers	9775	57690	12866	108661	0.14489	0.105869	0.516981	3.39377e-135	2.42655e-133
MA0740.1	KLF14	C2H2 zinc finger factors	Three-zinc finger Kruppel-related	25480	41985	39032	82495	0.377677	0.32118	0.359111	4.64294e-135	2.95085e-133
MA0733.1	EGR4	C2H2 zinc finger factors	Three-zinc finger Kruppel-related	26064	41401	40056	81471	0.386334	0.329606	0.356633	1.1865e-134	6.78675e-133
MA0472.2	EGR2	C2H2 zinc finger factors	Three-zinc finger Kruppel-related	18258	49207	26733	94794	0.270629	0.219976	0.395799	8.23151e-134	4.28038e-132
MA0685.1	SP4	C2H2 zinc finger factors	Three-zinc finger Kruppel-related	28839	38626	45188	76339	0.427466	0.371835	0.334908	4.70661e-124	2.24349e-122
MA1102.1	CTCFL	C2H2 zinc finger factors	More than 3 adjacent zinc fingers	37692	29773	61315	60212	0.55869	0.504538	0.314055	4.52196e-113	1.98966e-111
MA0741.1	KLF16	C2H2 zinc finger factors	Three-zinc finger Kruppel-related	36451	31014	59159	62368	0.540295	0.486797	0.309237	4.13227e-110	1.68833e-108
MA0746.1	SP3	C2H2 zinc finger factors	Three-zinc finger Kruppel-related	36842	30623	59929	61598	0.546091	0.493133	0.306355	5.60035e-108	2.1356e-106
MA0747.1	SP8	C2H2 zinc finger factors	Three-zinc finger Kruppel-related	34553	32912	56221	65306	0.512162	0.462621	0.286294	1.03751e-94	3.70909e-93
MA0751.1	ZIC4	C2H2 zinc finger factors	More than 3 adjacent zinc fingers	26321	41144	41770	79757	0.390143	0.34371	0.288658	7.79681e-90	2.6234e-88
MA0810.1	TFAP2A	Basic helix-span-helix factors (bHSH)	AP-2	27522	39943	43944	77583	0.407945	0.361599	0.282701	7.93395e-88	2.52123e-86
MA1099.1	Hes1	Basic helix-loop-helix factors (bHLH)	Hairy-related factors	11307	56158	16284	105243	0.167598	0.133995	0.379883	4.74353e-86	1.42805e-84
MA0750.2	ZBTB7A	C2H2 zinc finger factors	More than 3 adjacent zinc fingers	22962	44503	36047	85480	0.340354	0.296617	0.291034	1.76004e-85	5.03373e-84
MA0003.3	TFAP2A	Basic helix-span-helix factors (bHSH)	AP-2	23928	43537	37746	83781	0.354673	0.310598	0.286738	7.67034e-85	2.08926e-83
MA0516.1	SP2	C2H2 zinc finger factors	Three-zinc finger Kruppel-related	45251	22214	76138	45389	0.670733	0.626511	0.280202	1.01252e-82	2.63254e-81
MA0079.3	SP1	C2H2 zinc finger factors	Three-zinc finger Kruppel-related	45137	22328	76011	45516	0.669043	0.625466	0.275618	2.93283e-80	7.29381e-79
MA0599.1	KLF5	C2H2 zinc finger factors	Three-zinc finger Kruppel-related	42698	24767	71516	50011	0.632891	0.588478	0.269724	4.07734e-80	9.71766e-79
MA0872.1	TFAP2A	Basic helix-span-helix factors (bHSH)	AP-2	22332	45133	35208	86319	0.331016	0.289713	0.278687	1.85496e-77	4.24415e-76
MA0815.1	TFAP2C	Basic helix-span-helix factors (bHSH)	AP-2	21299	46166	33456	88071	0.315704	0.275297	0.280338	2.7024e-76	5.94527e-75
MA0812.1	TFAP2B	Basic helix-span-helix factors (bHSH)	AP-2	22502	44963	35575	85952	0.333536	0.292733	0.273965	2.89886e-75	6.14129e-74
MA0813.1	TFAP2B	Basic helix-span-helix factors (bHSH)	AP-2	22348	45117	35439	86088	0.331253	0.291614	0.266932	2.36517e-71	4.8317e-70
MA0696.1	ZIC1	C2H2 zinc finger factors	More than 3 adjacent zinc fingers	26147	41318	42105	79422	0.387564	0.346466	0.255408	9.87762e-71	1.94828e-69
MA0742.1	Klf12	C2H2 zinc finger factors	Three-zinc finger Kruppel-related	24157	43308	38650	82877	0.358067	0.318036	0.258296	9.67794e-70	1.84526e-68
MA0736.1	GLIS2	C2H2 zinc finger factors	More than 3 adjacent zinc fingers	21497	45968	34131	87396	0.318639	0.280851	0.259974	2.11134e-66	3.89576e-65
MA0062.2	Gabpa	Tryptophan cluster factors	Ets-related	15047	52418	23056	98471	0.223034	0.189719	0.293948	2.71499e-66	4.85304e-65
MA1107.1	KLF9	C2H2 zinc finger factors	Three-zinc finger Kruppel-related	37125	30340	61899	59628	0.550285	0.509344	0.237238	2.05242e-65	3.55752e-64
MA0765.1	ETV5	Tryptophan cluster factors	Ets-related	7420	60045	10479	111048	0.109983	0.0862278	0.389017	7.15994e-63	1.20455e-61
MA0471.1	E2F6	Fork headwinged helix factors	E2F	33787	33678	56010	65517	0.500808	0.460885	0.23084	3.2936e-62	5.38269e-61
MA0753.1	ZNF740	C2H2 zinc finger factors	Other factors with up to three adjacent zinc fingers	26840	40625	43749	77778	0.397836	0.359994	0.232119	1.87883e-59	2.98525e-58
MA0028.2	ELK1	Tryptophan cluster factors	Ets-related	8041	59424	11572	109955	0.119188	0.0952216	0.362569	3.44643e-59	5.328e-58
MA0811.1	TFAP2B	Basic helix-span-helix factors (bHSH)	AP-2	23833	43632	38489	83038	0.353265	0.316712	0.236887	1.0568e-58	1.59076e-57
MA0697.1	ZIC3	C2H2 zinc finger factors	More than 3 adjacent zinc fingers	26705	40760	43550	77977	0.395835	0.358357	0.230321	1.7828e-58	2.61477e-57
MA0139.1	CTCF	C2H2 zinc finger factors	More than 3 adjacent zinc fingers	35698	31767	59611	61916	0.529134	0.490517	0.223043	3.14981e-58	4.50423e-57
MA0493.1	Klf1	C2H2 zinc finger factors	Three-zinc finger Kruppel-related	31272	36193	51671	69856	0.463529	0.425181	0.224183	3.40287e-58	4.74742e-57
MA0524.2	TFAP2C	Basic helix-span-helix factors (bHSH)	AP-2	23460	44005	37936	83591	0.347736	0.312161	0.232304	4.21577e-56	5.74147e-55
MA0146.2	Zfx	C2H2 zinc finger factors	More than 3 adjacent zinc fingers	34685	32780	58000	63527	0.514118	0.47726	0.212808	3.31755e-53	4.41312e-52
MA0163.1	PLAG1	C2H2 zinc finger factors	More than 3 adjacent zinc fingers	35289	32176	59092	62435	0.523071	0.486246	0.212621	4.02428e-53	5.23156e-52
MA0735.1	GLIS1	C2H2 zinc finger factors	More than 3 adjacent zinc fingers	11664	55801	17749	103778	0.17289	0.14605	0.289441	5.18547e-53	6.59131e-52
MA0759.1	ELK3	Tryptophan cluster factors	Ets-related	7949	59516	11600	109927	0.117824	0.095452	0.339886	5.42605e-52	6.74718e-51
MA0695.1	ZBTB7C	C2H2 zinc finger factors	More than 3 adjacent zinc fingers	17028	50437	26976	94551	0.252398	0.221975	0.242829	2.0602e-50	2.5073e-49
MA0761.1	ETV1	Tryptophan cluster factors	Ets-related	6976	60489	10066	111461	0.103402	0.0828293	0.352742	1.02958e-49	1.20284e-48
MA0076.2	ELK4	Tryptophan cluster factors	Ets-related	17691	49774	28146	93381	0.262225	0.231603	0.237809	1.0304e-49	1.20284e-48
MA0764.1	ETV4	Tryptophan cluster factors	Ets-related	7026	60439	10162	111365	0.104143	0.0836193	0.349302	3.94965e-49	4.5184e-48
MA0694.1	ZBTB7B	C2H2 zinc finger factors	More than 3 adjacent zinc fingers	15581	51884	24747	96780	0.230949	0.203634	0.231941	1.76907e-43	1.98413e-42
MA0156.2	FEV	Tryptophan cluster factors	Ets-related	7412	60053	11038	110489	0.109864	0.0908276	0.305026	4.08211e-40	4.49032e-39
MA0814.1	TFAP2C	Basic helix-span-helix factors (bHSH)	AP-2	23992	43473	39688	81839	0.355621	0.326578	0.186513	2.41719e-37	2.60874e-36
MA0014.3	PAX5	Paired box factors	Paired domain only	13428	54037	21293	100234	0.199037	0.175212	0.226205	2.92107e-37	3.09417e-36
MA0504.1	NR2C2	Nuclear receptors with C4 zinc fingers	RXR-related receptors (NR2)	28126	39339	47023	74504	0.416898	0.386935	0.17989	3.78241e-37	3.93371e-36
MA0475.2	FLI1	Tryptophan cluster factors	Ets-related	8318	59147	12731	108796	0.123294	0.104759	0.265193	3.41787e-34	3.42986e-33
MA0763.1	ETV3	Tryptophan cluster factors	Ets-related	7311	60154	11055	110472	0.108367	0.0909674	0.280369	5.89301e-34	5.81173e-33
MA0748.1	YY2	C2H2 zinc finger factors	More than 3 adjacent zinc fingers	6266	61199	9360	112167	0.0928778	0.0770199	0.295081	1.21485e-32	1.17779e-31
MA0473.2	ELF1	Tryptophan cluster factors	Ets-related	10927	56538	17256	104271	0.161965	0.141993	0.223832	3.18731e-31	3.03857e-30
MA1108.1	MXI1	Basic helix-loop-helix factors (bHLH)	bHLH-ZIP	11179	56286	17692	103835	0.165701	0.145581	0.221127	4.76821e-31	4.47118e-30
MA0645.1	ETV6	Tryptophan cluster factors	Ets-related	13894	53571	22372	99155	0.205944	0.184091	0.200992	1.1473e-30	1.05848e-29
MA0474.2	ERG	Tryptophan cluster factors	Ets-related	8362	59103	12972	108555	0.123946	0.106742	0.243627	2.19456e-29	1.99252e-28
MA0098.3	ETS1	Tryptophan cluster factors	Ets-related	9751	57714	15347	106180	0.144534	0.126285	0.225172	8.18156e-29	7.31227e-28
MA0615.1	Gmeb1	SAND domain factors	GMEB	3342	64123	4706	116821	0.0495368	0.0387239	0.371559	2.60017e-28	2.25348e-27
MA1100.1	ASCL1	Basic helix-loop-helix factors (bHLH)	MyoDASC-related factors	36071	31394	61772	59755	0.534662	0.508299	0.152455	4.36829e-28	3.72935e-27
MA0823.1	HEY1	Basic helix-loop-helix factors (bHLH)	Hairy-related factors	8314	59151	12961	108566	0.123234	0.106651	0.235521	1.68755e-27	1.41953e-26
MA0155.1	INSM1	C2H2 zinc finger factors	Factors with multiple dispersed zinc fingers	27549	39916	46534	74993	0.408345	0.382911	0.1535	2.2623e-27	1.87541e-26
MA0528.1	ZNF263	C2H2 zinc finger factors	More than 3 adjacent zinc fingers	53977	13488	94651	26876	0.800074	0.778847	0.184339	2.74676e-27	2.24449e-26
MA0147.3	MYC	Basic helix-loop-helix factors (bHLH)	bHLH-ZIP	14193	53272	23063	98464	0.210376	0.189777	0.185811	6.40227e-27	5.15788e-26
MA1125.1	ZNF384	C2H2 zinc finger factors	More than 3 adjacent zinc fingers	23579	43886	45478	76049	0.3495	0.374221	-0.154496	9.73442e-27	7.73346e-26
MA0641.1	ELF4	Tryptophan cluster factors	Ets-related	11663	55802	18707	102820	0.172875	0.153933	0.200083	1.05688e-26	8.28132e-26
MA0041.1	Foxd3	Fork headwinged helix factors	FOX	16145	51320	31732	89795	0.239309	0.261111	-0.16771	1.23054e-25	9.51176e-25
MA0760.1	ERF	Tryptophan cluster factors	Ets-related	8546	58919	13499	108028	0.126673	0.111078	0.215058	8.1414e-24	6.20917e-23
MA0657.1	KLF13	C2H2 zinc finger factors	Three-zinc finger Kruppel-related	13764	53701	22517	99010	0.204017	0.185284	0.172504	5.6328e-23	4.23942e-22
MA1149.1	RARA::RXRG	Nuclear receptors with C4 zinc fingers::Nuclear receptors with C4 zinc fingers	Thyroid hormone receptor-related factors (NR1)::RXR-related receptors (NR2)	19116	48349	31946	89581	0.283347	0.262872	0.148848	9.65919e-22	7.1754e-21
MA0050.2	IRF1	Tryptophan cluster factors	Interferon-regulatory factors	31037	36428	58658	62869	0.460046	0.482675	-0.131036	3.823e-21	2.80353e-20
MA0024.3	E2F1	Fork headwinged helix factors	E2F	3736	63729	5553	115974	0.0553769	0.0456935	0.291984	2.11507e-20	1.53142e-19
MA0073.1	RREB1	C2H2 zinc finger factors	Factors with multiple dispersed zinc fingers	33838	33627	58258	63269	0.501564	0.479383	0.128065	2.44614e-20	1.74899e-19
MA0686.1	SPDEF	Tryptophan cluster factors	Ets-related	6855	60610	10788	110739	0.101608	0.0887704	0.215325	6.38697e-20	4.5103e-19
MA0649.1	HEY2	Basic helix-loop-helix factors (bHLH)	Hairy-related factors	9729	57736	15743	105784	0.144208	0.129543	0.179224	5.17417e-19	3.6093e-18
MA0846.1	FOXC2	Fork headwinged helix factors	FOX	14227	53238	27780	93747	0.21088	0.228591	-0.149052	5.96697e-19	4.08784e-18
MA0067.1	Pax2	Paired box factors	Paired domain only	5134	62331	7924	113603	0.0760987	0.0652036	0.239819	6.00312e-19	4.08784e-18
MA0597.1	THAP1	C2CH THAP-type zinc finger factors	THAP-related factors	24634	42831	41929	79598	0.365137	0.345018	0.126777	1.94598e-18	1.30953e-17
MA0601.1	Arid3b	ARID	ARID-related	7382	60083	14910	106617	0.10942	0.122689	-0.186832	7.60115e-18	5.05565e-17
MA0149.1	EWSR1-FLI1	Tryptophan cluster factors	Ets-related	43314	24151	75631	45896	0.642022	0.622339	0.122114	1.98222e-17	1.30325e-16
MA0135.1	Lhx3	Homeo domain factors	HD-LIM	7921	59544	15898	105629	0.117409	0.130819	-0.178155	2.91264e-17	1.89321e-16
MA0734.1	GLI2	C2H2 zinc finger factors	More than 3 adjacent zinc fingers	13664	53801	22672	98855	0.202535	0.186559	0.147145	3.7797e-17	2.4292e-16
MA0598.2	EHF	Tryptophan cluster factors	Ets-related	11135	56330	18273	103254	0.165049	0.150362	0.159605	4.26089e-17	2.70803e-16
MA0737.1	GLIS3	C2H2 zinc finger factors	More than 3 adjacent zinc fingers	17188	50277	28859	92668	0.254769	0.23747	0.13455	5.66093e-17	3.5583e-16
MA0259.1	ARNT::HIF1A	Basic helix-loop-helix factors (bHLH)::Basic helix-loop-helix factors (bHLH)	PAS domain factors::PAS domain factors	7448	60017	11931	109596	0.110398	0.0981757	0.188954	6.7827e-17	4.21707e-16
MA0604.1	Atf1	Basic leucine zipper factors (bZIP)	CREB-related factors	4087	63378	6247	115280	0.0605796	0.0514042	0.250951	7.07553e-17	4.35183e-16
MA0104.4	MYCN	Basic helix-loop-helix factors (bHLH)	bHLH-ZIP	9864	57601	16095	105432	0.146209	0.13244	0.165773	1.03814e-16	6.31721e-16
MA0142.1	Pou5f1::Sox2	Homeo domain factors::High-mobility group (HMG) domain factors	POU domain factors::SOX-related factors	12882	54583	25111	96416	0.190943	0.206629	-0.142184	3.05588e-16	1.83996e-15
MA0138.2	REST	C2H2 zinc finger factors	Factors with multiple dispersed zinc fingers	25870	41595	44301	77226	0.383458	0.364536	0.116615	3.67478e-16	2.18956e-15
MA0464.2	BHLHE40	Basic helix-loop-helix factors (bHLH)	Hairy-related factors	5991	61474	9507	112020	0.0888016	0.0782295	0.199505	1.44145e-15	8.50008e-15
MA0593.1	FOXP2	Fork headwinged helix factors	FOX	13996	53469	27115	94412	0.207456	0.223119	-0.13385	2.2689e-15	1.3243e-14
MA0913.1	Hoxd9	Homeo domain factors	HOX	9186	58279	18166	103361	0.136159	0.149481	-0.157126	2.58725e-15	1.49486e-14
MA0845.1	FOXB1	Fork headwinged helix factors	FOX	9987	57478	19654	101873	0.148032	0.161725	-0.151047	3.74004e-15	2.1393e-14
MA0032.2	FOXC1	Fork headwinged helix factors	FOX	11466	55999	22400	99127	0.169955	0.184321	-0.142297	5.07423e-15	2.87372e-14
MA1106.1	HIF1A	Basic helix-loop-helix factors (bHLH)	PAS domain factors	6316	61149	10092	111435	0.0936189	0.0830433	0.189664	6.92266e-15	3.88212e-14
MA0497.1	MEF2C	MADS box factors	Regulators of differentiation	18450	49015	35259	86268	0.273475	0.290133	-0.118813	1.33869e-14	7.43425e-14
MA0822.1	HES7	Basic helix-loop-helix factors (bHLH)	Hairy-related factors	10300	57165	16975	104552	0.152672	0.139681	0.150245	1.68647e-14	9.27558e-14
MA0609.1	Crem	Basic leucine zipper factors (bZIP)	CREB-related factors	2519	64946	3731	117796	0.0373379	0.030701	0.292244	1.88957e-14	1.02937e-13
MA0621.1	mix-a	Homeo domain factors	Paired-related HD factors	5265	62200	10719	110808	0.0780405	0.0882026	-0.192628	2.0762e-14	1.12037e-13
MA0148.3	FOXA1	Fork headwinged helix factors	FOX	11894	55571	23152	98375	0.176299	0.190509	-0.136979	2.25622e-14	1.20613e-13
MA0910.1	Hoxd8	Homeo domain factors	HOX	6775	60690	13575	107952	0.100422	0.111704	-0.171836	2.81232e-14	1.48949e-13
MA0675.1	NKX6-2	Homeo domain factors	NK	6148	61317	12371	109156	0.0911287	0.101796	-0.176777	6.23822e-14	3.27363e-13
MA0638.1	CREB3	Basic leucine zipper factors (bZIP)	CREB-related factors	5528	61937	8803	112724	0.0819388	0.0724366	0.192675	1.02247e-13	5.31685e-13
MA0899.1	HOXA10	Homeo domain factors	HOX	8915	58550	17560	103967	0.132143	0.144495	-0.149635	1.03539e-13	5.33552e-13
MA0851.1	Foxj3	Fork headwinged helix factors	FOX	11701	55764	22730	98797	0.173438	0.187037	-0.132866	1.95514e-13	9.98517e-13
MA0507.1	POU2F2	Homeo domain factors	POU domain factors	11930	55535	23147	98380	0.176832	0.190468	-0.131297	2.41313e-13	1.22151e-12
MA0869.1	Sox11	High-mobility group (HMG) domain factors	SOX-related factors	9889	57576	19345	102182	0.14658	0.159183	-0.140495	3.41579e-13	1.71389e-12
MA0707.1	MNX1	Homeo domain factors	HOX	6761	60704	13476	108051	0.100215	0.110889	-0.163268	5.44792e-13	2.70975e-12
MA0063.1	Nkx2-5	Homeo domain factors	NK	5726	61739	11514	110013	0.0848736	0.0947444	-0.174404	7.40463e-13	3.65125e-12
MA0674.1	NKX6-1	Homeo domain factors	NK	6011	61454	12053	109474	0.0890981	0.0991796	-0.17074	7.49254e-13	3.66302e-12
MA0047.2	Foxa2	Fork headwinged helix factors	FOX	11555	55910	22416	99111	0.171274	0.184453	-0.130105	7.76263e-13	3.7629e-12
MA0502.1	NFYB	Heteromeric CCAAT-binding factors	Heteromeric CCAAT-binding	9308	58157	15354	106173	0.137968	0.126342	0.146316	7.87905e-13	3.78724e-12
MA0606.1	NFAT5	Rel homology region (RHR) factors	NFAT-related factors	15844	51621	30331	91196	0.234848	0.249582	-0.115879	8.57715e-13	4.08844e-12
MA0152.1	NFATC2	Rel homology region (RHR) factors	NFAT-related factors	15370	52095	29451	92076	0.227822	0.242341	-0.116554	1.05608e-12	4.99237e-12
MA0636.1	BHLHE41	Basic helix-loop-helix factors (bHLH)	Hairy-related factors	4844	62621	7687	113840	0.0718002	0.0632534	0.196058	1.13681e-12	5.32997e-12
MA0046.2	HNF1A	Homeo domain factors	POU domain factors	6067	61398	12146	109381	0.0899281	0.0999449	-0.16836	1.29306e-12	6.01327e-12
MA0102.3	CEBPA	Basic leucine zipper factors (bZIP)	CEBP-related	9150	58315	17928	103599	0.135626	0.147523	-0.141331	1.31689e-12	6.07468e-12
MA0136.2	ELF5	Tryptophan cluster factors	Ets-related	14163	53302	23862	97665	0.209931	0.196351	0.121061	1.97169e-12	9.02245e-12
MA0790.1	POU4F1	Homeo domain factors	POU domain factors	8898	58567	17445	104082	0.131891	0.143548	-0.14173	2.08021e-12	9.44351e-12
MA0619.1	LIN54	CRC domain		10261	57204	19979	101548	0.152094	0.1644	-0.13337	2.43309e-12	1.09585e-11
MA0603.1	Arntl	Basic helix-loop-helix factors (bHLH)	PAS domain factors	6450	61015	10448	111079	0.0956051	0.0859727	0.168488	2.54002e-12	1.13507e-11
MA0650.1	HOXA13	Homeo domain factors	HOX	9606	57859	18758	102769	0.142385	0.154353	-0.136737	2.59978e-12	1.15277e-11
MA0608.1	Creb3l2	Basic leucine zipper factors (bZIP)	CREB-related factors	5991	61474	9663	111864	0.0888016	0.0795132	0.174016	2.81588e-12	1.23899e-11
MA0878.1	CDX1	Homeo domain factors	HOX	8888	58577	17416	104111	0.131742	0.14331	-0.140796	2.99682e-12	1.30854e-11
MA0791.1	POU4F3	Homeo domain factors	POU domain factors	8488	58977	16666	104861	0.125813	0.137138	-0.143188	3.35172e-12	1.45241e-11
MA0868.1	SOX8	High-mobility group (HMG) domain factors	SOX-related factors	9072	58393	17752	103775	0.13447	0.146075	-0.138927	3.877e-12	1.6674e-11
MA0912.1	Hoxd3	Homeo domain factors	HOX	5667	61798	11362	110165	0.0839991	0.0934936	-0.169558	4.06665e-12	1.73591e-11
MA0670.1	NFIA	SMADNF-1 DNA-binding domain factors	Nuclear factor 1	13698	53767	26325	95202	0.203039	0.216619	-0.118229	4.09765e-12	1.73619e-11
MA0767.1	GCM2	GCM domain factors	GCM	9495	57970	15729	105798	0.14074	0.129428	0.139743	5.0403e-12	2.11989e-11
MA0909.1	HOXD13	Homeo domain factors	HOX	9070	58395	17735	103792	0.13444	0.145935	-0.137676	5.91727e-12	2.47057e-11
MA0901.1	HOXB13	Homeo domain factors	HOX	9211	58254	17998	103529	0.13653	0.148099	-0.13683	5.98743e-12	2.48174e-11
MA0793.1	POU6F2	Homeo domain factors	POU domain factors	6553	60912	13021	108506	0.0971318	0.107145	-0.157667	6.37398e-12	2.62296e-11
MA0713.1	PHOX2A	Homeo domain factors	Paired-related HD factors	5723	61742	11453	110074	0.0848292	0.0942424	-0.166764	7.41169e-12	3.02821e-11
MA0465.1	CDX2	Homeo domain factors	HOX	9341	58124	18216	103311	0.138457	0.149893	-0.133798	1.29906e-11	5.26993e-11
MA0683.1	POU4F2	Homeo domain factors	POU domain factors	8696	58769	17007	104520	0.128896	0.139944	-0.137081	1.68816e-11	6.8002e-11
MA0681.1	Phox2b	Homeo domain factors	Paired-related HD factors	5516	61949	11042	110485	0.0817609	0.0908605	-0.16664	1.7438e-11	6.9752e-11
MA0468.1	DUX4	Homeo domain factors	Paired-related HD factors	7423	60042	14622	106905	0.110027	0.120319	-0.14581	2.16808e-11	8.6121e-11
MA0893.1	GSX2	Homeo domain factors	HOX	6426	61039	12743	108784	0.0952494	0.104857	-0.154078	2.95596e-11	1.16608e-10
MA0788.1	POU3F3	Homeo domain factors	POU domain factors	10045	57420	19495	102032	0.148892	0.160417	-0.127258	3.48598e-11	1.36574e-10
MA0618.1	LBX1	Homeo domain factors	NK	5363	62102	10729	110798	0.0794931	0.0882849	-0.165213	4.41067e-11	1.71626e-10
MA0480.1	Foxo1	Fork headwinged helix factors	FOX	15820	51645	30129	91398	0.234492	0.24792	-0.105899	6.53586e-11	2.52602e-10
MA0892.1	GSX1	Homeo domain factors	HOX	5271	62194	10545	110982	0.0781294	0.0867708	-0.164962	7.01311e-11	2.69228e-10
MA0052.3	MEF2A	MADS box factors	Regulators of differentiation	13296	54169	25480	96047	0.19708	0.209665	-0.112128	7.83673e-11	2.98841e-10
MA0483.1	Gfi1B	C2H2 zinc finger factors	More than 3 adjacent zinc fingers	17864	49601	33868	87659	0.264789	0.278687	-0.101366	8.09636e-11	3.06697e-10
MA0602.1	Arid5a	ARID	ARID-related	5552	61913	11067	110460	0.0822945	0.0910662	-0.160004	9.3457e-11	3.51693e-10
MA0040.1	Foxq1	Fork headwinged helix factors	FOX	9056	58409	17610	103917	0.134233	0.144906	-0.128306	1.55398e-10	5.80966e-10
MA0058.3	MAX	Basic helix-loop-helix factors (bHLH)	bHLH-ZIP	7461	60004	12297	109230	0.110591	0.101187	0.143369	1.77668e-10	6.59911e-10
MA0039.3	KLF4	C2H2 zinc finger factors	Three-zinc finger Kruppel-related	21948	45517	37811	83716	0.325324	0.311133	0.0943799	2.15066e-10	7.9005e-10
MA0784.1	POU1F1	Homeo domain factors	POU domain factors	10159	57306	19647	101880	0.150582	0.161668	-0.121463	2.15468e-10	7.9005e-10
MA0904.1	Hoxb5	Homeo domain factors	HOX	4819	62646	9659	111868	0.0714296	0.0794803	-0.166666	2.47694e-10	9.02425e-10
MA0594.1	Hoxa9	Homeo domain factors	HOX	6778	60687	13333	108194	0.100467	0.109712	-0.141935	3.85166e-10	1.3944e-09
MA0680.1	PAX7	Paired box factors	Paired plus homeo domain	2661	64804	5531	115996	0.0394427	0.0455125	-0.215689	4.41561e-10	1.58851e-09
MA0702.1	LMX1A	Homeo domain factors	HD-LIM	4463	63002	8964	112563	0.0661528	0.0737614	-0.168895	5.77534e-10	2.05186e-09
MA0703.1	LMX1B	Homeo domain factors	HD-LIM	4463	63002	8964	112563	0.0661528	0.0737614	-0.168895	5.77534e-10	2.05186e-09
MA0084.1	SRY	High-mobility group (HMG) domain factors	SOX-related factors	8235	59230	16039	105488	0.122063	0.131979	-0.129089	6.19187e-10	2.17519e-09
MA0786.1	POU3F1	Homeo domain factors	POU domain factors	10062	57403	19432	102095	0.149144	0.159899	-0.118827	6.19854e-10	2.17519e-09
MA0854.1	Alx1	Homeo domain factors	Paired-related HD factors	3875	63590	7845	113682	0.0574372	0.0645536	-0.179476	6.71712e-10	2.3428e-09
MA0622.1	Mlxip	Basic helix-loop-helix factors (bHLH)	bHLH-ZIP	7736	59729	12814	108713	0.114667	0.105442	0.135956	7.91009e-10	2.72565e-09
MA0715.1	PROP1	Homeo domain factors	Paired-related HD factors	6006	61459	11864	109663	0.0890239	0.0976244	-0.146759	8.36701e-10	2.86582e-09
MA1152.1	SOX15	High-mobility group (HMG) domain factors	SOX-related factors	15233	52232	28952	92575	0.225791	0.238235	-0.1008	8.70123e-10	2.96256e-09
MA0676.1	Nr2e1	Nuclear receptors with C4 zinc fingers	RXR-related receptors (NR2)	9345	58120	18088	103439	0.138516	0.148839	-0.121116	9.34767e-10	3.16383e-09
MA0610.1	DMRT3	DM-type intertwined zinc finger factors	DMRT factors	5424	62041	10764	110763	0.0803972	0.0885729	-0.152629	1.00642e-09	3.38629e-09
MA0773.1	MEF2D	MADS box factors	Regulators of differentiation	12396	55069	23726	97801	0.18374	0.195232	-0.10801	1.06348e-09	3.55736e-09
MA0757.1	ONECUT3	Homeo domain factors	HD-CUT	6954	60511	13630	107897	0.103076	0.112156	-0.13651	1.1416e-09	3.79648e-09
MA0153.2	HNF1B	Homeo domain factors	POU domain factors	4591	62874	9186	112341	0.0680501	0.0755881	-0.163307	1.37127e-09	4.5339e-09
MA0718.1	RAX	Homeo domain factors	Paired-related HD factors	4591	62874	9181	112346	0.0680501	0.075547	-0.162457	1.61997e-09	5.32541e-09
MA0867.1	SOX4	High-mobility group (HMG) domain factors	SOX-related factors	10154	57311	19566	101961	0.150508	0.161001	-0.11519	1.80534e-09	5.90087e-09
MA0839.1	CREB3L1	Basic leucine zipper factors (bZIP)	CREB-related factors	8194	59271	13636	107891	0.121456	0.112206	0.129392	1.86777e-09	6.07024e-09
MA0781.1	PAX9	Paired box factors	Paired domain only	7574	59891	12558	108969	0.112266	0.103335	0.134024	1.87975e-09	6.07469e-09
MA0787.1	POU3F2	Homeo domain factors	POU domain factors	9817	57648	18937	102590	0.145512	0.155825	-0.116329	2.10828e-09	6.77491e-09
MA0634.1	ALX3	Homeo domain factors	Paired-related HD factors	5745	61720	11346	110181	0.0851553	0.093362	-0.145764	2.26973e-09	7.25298e-09
MA0462.1	BATF::JUN	Basic leucine zipper factors (bZIP)::Basic leucine zipper factors (bZIP)	B-ATF-related factors::Jun-related	11341	56124	21751	99776	0.168102	0.178981	-0.109482	2.38012e-09	7.5635e-09
MA0485.1	Hoxc9	Homeo domain factors	HOX	6743	60722	13211	108316	0.0999481	0.108708	-0.135346	2.62747e-09	8.3034e-09
MA0700.1	LHX2	Homeo domain factors	HD-LIM	4574	62891	9137	112390	0.0677981	0.0751849	-0.160703	2.65162e-09	8.33368e-09
MA0884.1	DUXA	Homeo domain factors	Paired-related HD factors	6070	61395	11945	109582	0.0899726	0.0982909	-0.140845	3.23465e-09	1.01105e-08
MA0048.2	NHLH1	Basic helix-loop-helix factors (bHLH)	Tal-related	22376	45089	38692	82835	0.331668	0.318382	0.0873806	3.45609e-09	1.0617e-08
MA0630.1	SHOX	Homeo domain factors	Paired-related HD factors	4579	62886	9139	112388	0.0678722	0.0752014	-0.159353	3.54519e-09	1.0617e-08
MA0654.1	ISX	Homeo domain factors	Paired-related HD factors	4579	62886	9139	112388	0.0678722	0.0752014	-0.159353	3.54519e-09	1.0617e-08
MA0701.1	LHX9	Homeo domain factors	HD-LIM	4579	62886	9139	112388	0.0678722	0.0752014	-0.159353	3.54519e-09	1.0617e-08
MA0716.1	PRRX1	Homeo domain factors	Paired-related HD factors	4579	62886	9139	112388	0.0678722	0.0752014	-0.159353	3.54519e-09	1.0617e-08
MA0717.1	RAX2	Homeo domain factors	Paired-related HD factors	4579	62886	9139	112388	0.0678722	0.0752014	-0.159353	3.54519e-09	1.0617e-08
MA0720.1	Shox2	Homeo domain factors	Paired-related HD factors	4579	62886	9139	112388	0.0678722	0.0752014	-0.159353	3.54519e-09	1.0617e-08
MA0721.1	UNCX	Homeo domain factors	Paired-related HD factors	4579	62886	9139	112388	0.0678722	0.0752014	-0.159353	3.54519e-09	1.0617e-08
MA0646.1	GCM1	GCM domain factors	GCM	11008	56457	18575	102952	0.163166	0.152847	0.111935	3.63206e-09	1.08205e-08
MA0725.1	VSX1	Homeo domain factors	Paired-related HD factors	4632	62833	9237	112290	0.0686578	0.0760078	-0.15818	3.7979e-09	1.11979e-08
MA0726.1	VSX2	Homeo domain factors	Paired-related HD factors	4632	62833	9237	112290	0.0686578	0.0760078	-0.15818	3.7979e-09	1.11979e-08
MA0495.2	MAFF	Basic leucine zipper factors (bZIP)	Maf-related	10180	57285	19588	101939	0.150893	0.161182	-0.112778	3.81924e-09	1.12031e-08
MA0640.1	ELF3	Tryptophan cluster factors	Ets-related	11829	55636	20021	101506	0.175335	0.164745	0.108286	4.23663e-09	1.2364e-08
MA0768.1	LEF1	High-mobility group (HMG) domain factors	TCF-7-related factors	12202	55263	23316	98211	0.180864	0.191859	-0.104654	4.39041e-09	1.27478e-08
MA0105.4	NFKB1	Rel homology region (RHR) factors	NF-kappaB-related factors	13633	53832	23198	98329	0.202075	0.190888	0.102254	4.4429e-09	1.2835e-08
MA0769.1	Tcf7	High-mobility group (HMG) domain factors	TCF-7-related factors	12448	55017	23766	97761	0.18451	0.195561	-0.103626	4.74706e-09	1.36448e-08
MA0662.1	MIXL1	Homeo domain factors	Paired-related HD factors	4541	62924	9060	112467	0.067309	0.0745513	-0.158708	4.82161e-09	1.37898e-08
MA0783.1	PKNOX2	Homeo domain factors	TALE-type homeo domain factors	13465	54000	25625	95902	0.199585	0.210858	-0.0997587	6.52665e-09	1.85734e-08
MA1421.1	TCF7L1	High-mobility group (HMG) domain factors	TCF-7-related factors	12578	54887	23992	97535	0.186437	0.197421	-0.102217	6.7284e-09	1.90527e-08
MA0825.1	MNT	Basic helix-loop-helix factors (bHLH)	bHLH-ZIP	7226	60239	11992	109535	0.107107	0.0986777	0.131816	7.00414e-09	1.97358e-08
MA0628.1	POU6F1	Homeo domain factors	POU domain factors	2551	64914	5263	116264	0.0378122	0.0433072	-0.204053	7.57888e-09	2.12506e-08
MA0894.1	HESX1	Homeo domain factors	Paired-related HD factors	4232	63233	8461	113066	0.0627288	0.0696224	-0.161099	8.63539e-09	2.40948e-08
MA1115.1	POU5F1	Homeo domain factors	POU domain factors	12357	55108	23571	97956	0.183162	0.193957	-0.101834	9.52756e-09	2.64552e-08
MA0481.2	FOXP1	Fork headwinged helix factors	FOX	10609	56856	20339	101188	0.157252	0.167362	-0.107327	1.18066e-08	3.26251e-08
MA0785.1	POU2F1	Homeo domain factors	POU domain factors	9340	58125	17987	103540	0.138442	0.148008	-0.112523	1.40554e-08	3.86523e-08
MA1140.1	JUNB	Basic leucine zipper factors (bZIP)	Jun-related	3102	64363	4917	116610	0.0459794	0.0404601	0.192799	1.42336e-08	3.89552e-08
MA0626.1	Npas2	Basic helix-loop-helix factors (bHLH)	PAS domain factors	7135	60330	11856	109671	0.105759	0.0975586	0.129599	1.4983e-08	4.08108e-08
MA0614.1	Foxj2	Fork headwinged helix factors	FOX	7535	59930	14633	106894	0.111688	0.120409	-0.122737	1.55287e-08	4.20944e-08
MA0874.1	Arx	Homeo domain factors	Paired-related HD factors	3530	63935	7116	114411	0.0523234	0.0585549	-0.171878	1.56014e-08	4.20944e-08
MA0796.1	TGIF1	Homeo domain factors	TALE-type homeo domain factors	10376	57089	19897	101630	0.153798	0.163725	-0.107279	1.61633e-08	4.34057e-08
MA0866.1	SOX21	High-mobility group (HMG) domain factors	SOX-related factors	8055	59410	15594	105933	0.119395	0.128317	-0.118681	1.79592e-08	4.80032e-08
MA0071.1	RORA	Nuclear receptors with C4 zinc fingers	Thyroid hormone receptor-related factors (NR1)	9149	58316	17623	103904	0.135611	0.145013	-0.112506	1.85507e-08	4.93534e-08
[truncated: 351 more rows]

## Sheet: 3.AD_vs_1.YA_Immature.up
Motif	Motif Name	Class	Family	Hits in list	Unhit in list	Hits in background	Unhit in background	Percent in list	Percent in background	Log2 Odds Ratio	PValue	QValue
[truncated: 563 more rows]

[truncated: 2 more sheets: 3.AD_vs_1.YA_Neural-Stem.down, 3.AD_vs_1.YA_Neural-Stem.up]
