# Supplementary material for: A roadmap to human hippocampal neurogenesis in adulthood, aging and AD.
Source: Research Square preprint supplement (doi:10.21203/rs.3.rs-4469965/v1), 2024-05-30
Supplement: Supplementary file 6 [file 5c52a033d6ceb8f189ae094c.xlsx]

## Sheet: CytoTrace_ADnegative_pathways
NAME	URL	NES	NOM p-val	FDR q-val
GOBP_COTRANSLATIONAL_PROTEIN_TARGETING_TO_MEMBRANE	http://www.gsea-msigdb.org/gsea/msigdb/human/geneset/GOBP_COTRANSLATIONAL_PROTEIN_TARGETING_TO_MEMBRANE.html	3.16001	0	0
GOBP_ESTABLISHMENT_OF_PROTEIN_LOCALIZATION_TO_ENDOPLASMIC_RETICULUM	http://www.gsea-msigdb.org/gsea/msigdb/human/geneset/GOBP_ESTABLISHMENT_OF_PROTEIN_LOCALIZATION_TO_ENDOPLASMIC_RETICULUM.html	3.10627	0	0
GOBP_NUCLEAR_TRANSCRIBED_MRNA_CATABOLIC_PROCESS_NONSENSE_MEDIATED_DECAY	http://www.gsea-msigdb.org/gsea/msigdb/human/geneset/GOBP_NUCLEAR_TRANSCRIBED_MRNA_CATABOLIC_PROCESS_NONSENSE_MEDIATED_DECAY.html	3.01783	0	0
GOBP_PROTEIN_LOCALIZATION_TO_ENDOPLASMIC_RETICULUM	http://www.gsea-msigdb.org/gsea/msigdb/human/geneset/GOBP_PROTEIN_LOCALIZATION_TO_ENDOPLASMIC_RETICULUM.html	3.01595	0	0
GOBP_PROTEIN_TARGETING_TO_MEMBRANE	http://www.gsea-msigdb.org/gsea/msigdb/human/geneset/GOBP_PROTEIN_TARGETING_TO_MEMBRANE.html	2.85525	0	0
GOBP_ESTABLISHMENT_OF_PROTEIN_LOCALIZATION_TO_MEMBRANE	http://www.gsea-msigdb.org/gsea/msigdb/human/geneset/GOBP_ESTABLISHMENT_OF_PROTEIN_LOCALIZATION_TO_MEMBRANE.html	2.76299	0	0
GOBP_VIRAL_GENE_EXPRESSION	http://www.gsea-msigdb.org/gsea/msigdb/human/geneset/GOBP_VIRAL_GENE_EXPRESSION.html	2.75359	0	0
GOBP_TRANSLATIONAL_INITIATION	http://www.gsea-msigdb.org/gsea/msigdb/human/geneset/GOBP_TRANSLATIONAL_INITIATION.html	2.74156	0	0
GOBP_NUCLEAR_TRANSCRIBED_MRNA_CATABOLIC_PROCESS	http://www.gsea-msigdb.org/gsea/msigdb/human/geneset/GOBP_NUCLEAR_TRANSCRIBED_MRNA_CATABOLIC_PROCESS.html	2.62785	0	0
GOBP_REGULATION_OF_NEUROTRANSMITTER_RECEPTOR_ACTIVITY	http://www.gsea-msigdb.org/gsea/msigdb/human/geneset/GOBP_REGULATION_OF_NEUROTRANSMITTER_RECEPTOR_ACTIVITY.html	2.47592	0	0
GOBP_REGULATION_OF_NMDA_RECEPTOR_ACTIVITY	http://www.gsea-msigdb.org/gsea/msigdb/human/geneset/GOBP_REGULATION_OF_NMDA_RECEPTOR_ACTIVITY.html	2.43828	0	0
GOBP_CYTOPLASMIC_TRANSLATION	http://www.gsea-msigdb.org/gsea/msigdb/human/geneset/GOBP_CYTOPLASMIC_TRANSLATION.html	2.3973	0	0
GOBP_NEUROTRANSMITTER_SECRETION	http://www.gsea-msigdb.org/gsea/msigdb/human/geneset/GOBP_NEUROTRANSMITTER_SECRETION.html	2.37525	0	0
GOBP_REGULATION_OF_CATION_CHANNEL_ACTIVITY	http://www.gsea-msigdb.org/gsea/msigdb/human/geneset/GOBP_REGULATION_OF_CATION_CHANNEL_ACTIVITY.html	2.35193	0	0
GOBP_GLUTAMATE_RECEPTOR_SIGNALING_PATHWAY	http://www.gsea-msigdb.org/gsea/msigdb/human/geneset/GOBP_GLUTAMATE_RECEPTOR_SIGNALING_PATHWAY.html	2.33941	0	0
GOBP_CHEMICAL_SYNAPTIC_TRANSMISSION_POSTSYNAPTIC	http://www.gsea-msigdb.org/gsea/msigdb/human/geneset/GOBP_CHEMICAL_SYNAPTIC_TRANSMISSION_POSTSYNAPTIC.html	2.3288	0	0
GOBP_IONOTROPIC_GLUTAMATE_RECEPTOR_SIGNALING_PATHWAY	http://www.gsea-msigdb.org/gsea/msigdb/human/geneset/GOBP_IONOTROPIC_GLUTAMATE_RECEPTOR_SIGNALING_PATHWAY.html	2.31185	0	0
GOBP_PROTEIN_TARGETING	http://www.gsea-msigdb.org/gsea/msigdb/human/geneset/GOBP_PROTEIN_TARGETING.html	2.30866	0	0
GOBP_REGULATION_OF_TRANS_SYNAPTIC_SIGNALING	http://www.gsea-msigdb.org/gsea/msigdb/human/geneset/GOBP_REGULATION_OF_TRANS_SYNAPTIC_SIGNALING.html	2.30534	0	0
GOBP_REGULATION_OF_POSTSYNAPTIC_MEMBRANE_POTENTIAL	http://www.gsea-msigdb.org/gsea/msigdb/human/geneset/GOBP_REGULATION_OF_POSTSYNAPTIC_MEMBRANE_POTENTIAL.html	2.29888	0	0
GOBP_OXIDATIVE_PHOSPHORYLATION	http://www.gsea-msigdb.org/gsea/msigdb/human/geneset/GOBP_OXIDATIVE_PHOSPHORYLATION.html	2.27439	0	0
GOBP_RIBOSOMAL_LARGE_SUBUNIT_BIOGENESIS	http://www.gsea-msigdb.org/gsea/msigdb/human/geneset/GOBP_RIBOSOMAL_LARGE_SUBUNIT_BIOGENESIS.html	2.26896	0	0
GOBP_SYNAPTIC_VESICLE_EXOCYTOSIS	http://www.gsea-msigdb.org/gsea/msigdb/human/geneset/GOBP_SYNAPTIC_VESICLE_EXOCYTOSIS.html	2.2668	0	0
GOBP_PROTEIN_LOCALIZATION_TO_MEMBRANE	http://www.gsea-msigdb.org/gsea/msigdb/human/geneset/GOBP_PROTEIN_LOCALIZATION_TO_MEMBRANE.html	2.26477	0	0
GOBP_REGULATION_OF_NEUROTRANSMITTER_TRANSPORT	http://www.gsea-msigdb.org/gsea/msigdb/human/geneset/GOBP_REGULATION_OF_NEUROTRANSMITTER_TRANSPORT.html	2.25873	0	0
GOBP_PRESYNAPSE_ORGANIZATION	http://www.gsea-msigdb.org/gsea/msigdb/human/geneset/GOBP_PRESYNAPSE_ORGANIZATION.html	2.24071	0	0
GOBP_ATP_SYNTHESIS_COUPLED_ELECTRON_TRANSPORT	http://www.gsea-msigdb.org/gsea/msigdb/human/geneset/GOBP_ATP_SYNTHESIS_COUPLED_ELECTRON_TRANSPORT.html	2.23787	0	0
GOBP_SYNAPTIC_SIGNALING	http://www.gsea-msigdb.org/gsea/msigdb/human/geneset/GOBP_SYNAPTIC_SIGNALING.html	2.23047	0	0
GOBP_REGULATION_OF_SYNAPTIC_PLASTICITY	http://www.gsea-msigdb.org/gsea/msigdb/human/geneset/GOBP_REGULATION_OF_SYNAPTIC_PLASTICITY.html	2.21585	0	0
GOBP_REGULATION_OF_CATION_TRANSMEMBRANE_TRANSPORT	http://www.gsea-msigdb.org/gsea/msigdb/human/geneset/GOBP_REGULATION_OF_CATION_TRANSMEMBRANE_TRANSPORT.html	2.21399	0	2.87113e-05
GOBP_REGULATION_OF_NEUROTRANSMITTER_LEVELS	http://www.gsea-msigdb.org/gsea/msigdb/human/geneset/GOBP_REGULATION_OF_NEUROTRANSMITTER_LEVELS.html	2.21281	0	2.77852e-05
GOBP_ACTION_POTENTIAL	http://www.gsea-msigdb.org/gsea/msigdb/human/geneset/GOBP_ACTION_POTENTIAL.html	2.21159	0	2.69169e-05
GOBP_NEUROTRANSMITTER_TRANSPORT	http://www.gsea-msigdb.org/gsea/msigdb/human/geneset/GOBP_NEUROTRANSMITTER_TRANSPORT.html	2.20519	0	5.2122e-05
GOBP_REGULATION_OF_MEMBRANE_POTENTIAL	http://www.gsea-msigdb.org/gsea/msigdb/human/geneset/GOBP_REGULATION_OF_MEMBRANE_POTENTIAL.html	2.20434	0	5.0589e-05
GOBP_REGULATION_OF_TRANSPORTER_ACTIVITY	http://www.gsea-msigdb.org/gsea/msigdb/human/geneset/GOBP_REGULATION_OF_TRANSPORTER_ACTIVITY.html	2.19036	0	4.91436e-05
GOBP_REGULATION_OF_SYNAPTIC_VESICLE_EXOCYTOSIS	http://www.gsea-msigdb.org/gsea/msigdb/human/geneset/GOBP_REGULATION_OF_SYNAPTIC_VESICLE_EXOCYTOSIS.html	2.17326	0	7.17169e-05
GOBP_PROTON_TRANSMEMBRANE_TRANSPORT	http://www.gsea-msigdb.org/gsea/msigdb/human/geneset/GOBP_PROTON_TRANSMEMBRANE_TRANSPORT.html	2.15346	0	9.31182e-05
GOBP_VESICLE_MEDIATED_TRANSPORT_IN_SYNAPSE	http://www.gsea-msigdb.org/gsea/msigdb/human/geneset/GOBP_VESICLE_MEDIATED_TRANSPORT_IN_SYNAPSE.html	2.15178	0	9.06678e-05
GOBP_REGULATION_OF_EXOCYTOSIS	http://www.gsea-msigdb.org/gsea/msigdb/human/geneset/GOBP_REGULATION_OF_EXOCYTOSIS.html	2.14309	0	0.000132801
GOBP_RIBOSOMAL_SMALL_SUBUNIT_BIOGENESIS	http://www.gsea-msigdb.org/gsea/msigdb/human/geneset/GOBP_RIBOSOMAL_SMALL_SUBUNIT_BIOGENESIS.html	2.12818	0	0.000151148
GOBP_REGULATION_OF_REGULATED_SECRETORY_PATHWAY	http://www.gsea-msigdb.org/gsea/msigdb/human/geneset/GOBP_REGULATION_OF_REGULATED_SECRETORY_PATHWAY.html	2.10928	0	0.000273584
GOBP_CATION_TRANSMEMBRANE_TRANSPORT	http://www.gsea-msigdb.org/gsea/msigdb/human/geneset/GOBP_CATION_TRANSMEMBRANE_TRANSPORT.html	2.10286	0	0.000329186
GOBP_RIBOSOME_ASSEMBLY	http://www.gsea-msigdb.org/gsea/msigdb/human/geneset/GOBP_RIBOSOME_ASSEMBLY.html	2.08738	0	0.000361347
GOBP_REGULATION_OF_TRANSMEMBRANE_TRANSPORT	http://www.gsea-msigdb.org/gsea/msigdb/human/geneset/GOBP_REGULATION_OF_TRANSMEMBRANE_TRANSPORT.html	2.08048	0	0.000392561
GOBP_PEPTIDE_BIOSYNTHETIC_PROCESS	http://www.gsea-msigdb.org/gsea/msigdb/human/geneset/GOBP_PEPTIDE_BIOSYNTHETIC_PROCESS.html	2.07945	0	0.000383838
GOBP_MEMBRANE_DEPOLARIZATION	http://www.gsea-msigdb.org/gsea/msigdb/human/geneset/GOBP_MEMBRANE_DEPOLARIZATION.html	2.07641	0	0.000375493
GOBP_CARDIAC_MUSCLE_CELL_ACTION_POTENTIAL	http://www.gsea-msigdb.org/gsea/msigdb/human/geneset/GOBP_CARDIAC_MUSCLE_CELL_ACTION_POTENTIAL.html	2.07363	0	0.000367504
GOBP_RNA_CATABOLIC_PROCESS	http://www.gsea-msigdb.org/gsea/msigdb/human/geneset/GOBP_RNA_CATABOLIC_PROCESS.html	2.06875	0	0.000359848
GOBP_RESPIRATORY_ELECTRON_TRANSPORT_CHAIN	http://www.gsea-msigdb.org/gsea/msigdb/human/geneset/GOBP_RESPIRATORY_ELECTRON_TRANSPORT_CHAIN.html	2.04964	0	0.000545853
GOBP_REGULATION_OF_SIGNALING_RECEPTOR_ACTIVITY	http://www.gsea-msigdb.org/gsea/msigdb/human/geneset/GOBP_REGULATION_OF_SIGNALING_RECEPTOR_ACTIVITY.html	2.03103	0	0.0007758
GOBP_ESTABLISHMENT_OF_PROTEIN_LOCALIZATION_TO_ORGANELLE	http://www.gsea-msigdb.org/gsea/msigdb/human/geneset/GOBP_ESTABLISHMENT_OF_PROTEIN_LOCALIZATION_TO_ORGANELLE.html	2.03015	0	0.000794501
GOBP_PEPTIDE_METABOLIC_PROCESS	http://www.gsea-msigdb.org/gsea/msigdb/human/geneset/GOBP_PEPTIDE_METABOLIC_PROCESS.html	2.02974	0	0.000779222
GOBP_POSITIVE_REGULATION_OF_CATION_TRANSMEMBRANE_TRANSPORT	http://www.gsea-msigdb.org/gsea/msigdb/human/geneset/GOBP_POSITIVE_REGULATION_OF_CATION_TRANSMEMBRANE_TRANSPORT.html	2.01733	0	0.00092659
GOBP_SODIUM_ION_TRANSMEMBRANE_TRANSPORT	http://www.gsea-msigdb.org/gsea/msigdb/human/geneset/GOBP_SODIUM_ION_TRANSMEMBRANE_TRANSPORT.html	2.01576	0	0.000925332
GOBP_INORGANIC_ION_TRANSMEMBRANE_TRANSPORT	http://www.gsea-msigdb.org/gsea/msigdb/human/geneset/GOBP_INORGANIC_ION_TRANSMEMBRANE_TRANSPORT.html	2.01338	0	0.000940066
GOBP_POSITIVE_REGULATION_OF_CALCIUM_ION_TRANSPORT	http://www.gsea-msigdb.org/gsea/msigdb/human/geneset/GOBP_POSITIVE_REGULATION_OF_CALCIUM_ION_TRANSPORT.html	2.00654	0	0.00103082
GOBP_CATION_TRANSPORT	http://www.gsea-msigdb.org/gsea/msigdb/human/geneset/GOBP_CATION_TRANSPORT.html	1.99728	0	0.0012095
GOBP_NEURON_PROJECTION_ORGANIZATION	http://www.gsea-msigdb.org/gsea/msigdb/human/geneset/GOBP_NEURON_PROJECTION_ORGANIZATION.html	1.98946	0	0.0013372
GOBP_TRANSMISSION_OF_NERVE_IMPULSE	http://www.gsea-msigdb.org/gsea/msigdb/human/geneset/GOBP_TRANSMISSION_OF_NERVE_IMPULSE.html	1.98708	0	0.0014466
GOBP_REGULATION_OF_POSTSYNAPSE_ORGANIZATION	http://www.gsea-msigdb.org/gsea/msigdb/human/geneset/GOBP_REGULATION_OF_POSTSYNAPSE_ORGANIZATION.html	1.97133	0	0.00176762
GOBP_RIBONUCLEOPROTEIN_COMPLEX_BIOGENESIS	http://www.gsea-msigdb.org/gsea/msigdb/human/geneset/GOBP_RIBONUCLEOPROTEIN_COMPLEX_BIOGENESIS.html	1.96891	0	0.00182347
GOBP_CALCIUM_ION_REGULATED_EXOCYTOSIS	http://www.gsea-msigdb.org/gsea/msigdb/human/geneset/GOBP_CALCIUM_ION_REGULATED_EXOCYTOSIS.html	1.96643	0	0.00184959
GOBP_RIBOSOME_BIOGENESIS	http://www.gsea-msigdb.org/gsea/msigdb/human/geneset/GOBP_RIBOSOME_BIOGENESIS.html	1.96641	0	0.00182023
GOBP_PRESYNAPTIC_ENDOCYTOSIS	http://www.gsea-msigdb.org/gsea/msigdb/human/geneset/GOBP_PRESYNAPTIC_ENDOCYTOSIS.html	1.95465	0	0.00210193
GOBP_POSITIVE_REGULATION_OF_CALCIUM_ION_TRANSMEMBRANE_TRANSPORT	http://www.gsea-msigdb.org/gsea/msigdb/human/geneset/GOBP_POSITIVE_REGULATION_OF_CALCIUM_ION_TRANSMEMBRANE_TRANSPORT.html	1.93313	0	0.00309153
GOBP_REGULATION_OF_SYNAPSE_STRUCTURE_OR_ACTIVITY	http://www.gsea-msigdb.org/gsea/msigdb/human/geneset/GOBP_REGULATION_OF_SYNAPSE_STRUCTURE_OR_ACTIVITY.html	1.93067	0	0.00316206
GOBP_MITOCHONDRIAL_ELECTRON_TRANSPORT_NADH_TO_UBIQUINONE	http://www.gsea-msigdb.org/gsea/msigdb/human/geneset/GOBP_MITOCHONDRIAL_ELECTRON_TRANSPORT_NADH_TO_UBIQUINONE.html	1.92996	0.00122699	0.00312772
GOBP_AMIDE_BIOSYNTHETIC_PROCESS	http://www.gsea-msigdb.org/gsea/msigdb/human/geneset/GOBP_AMIDE_BIOSYNTHETIC_PROCESS.html	1.92674	0	0.0032965
GOBP_POSITIVE_REGULATION_OF_TRANSPORTER_ACTIVITY	http://www.gsea-msigdb.org/gsea/msigdb/human/geneset/GOBP_POSITIVE_REGULATION_OF_TRANSPORTER_ACTIVITY.html	1.92647	0	0.00326122
GOBP_SYNAPTIC_VESICLE_RECYCLING	http://www.gsea-msigdb.org/gsea/msigdb/human/geneset/GOBP_SYNAPTIC_VESICLE_RECYCLING.html	1.91921	0	0.00349706
GOBP_MULTICELLULAR_ORGANISMAL_SIGNALING	http://www.gsea-msigdb.org/gsea/msigdb/human/geneset/GOBP_MULTICELLULAR_ORGANISMAL_SIGNALING.html	1.91732	0	0.00354511
GOBP_SYNAPTIC_VESICLE_LOCALIZATION	http://www.gsea-msigdb.org/gsea/msigdb/human/geneset/GOBP_SYNAPTIC_VESICLE_LOCALIZATION.html	1.91611	0	0.00357947
GOBP_ATP_METABOLIC_PROCESS	http://www.gsea-msigdb.org/gsea/msigdb/human/geneset/GOBP_ATP_METABOLIC_PROCESS.html	1.91487	0	0.00361337
GOBP_ORGANIC_CYCLIC_COMPOUND_CATABOLIC_PROCESS	http://www.gsea-msigdb.org/gsea/msigdb/human/geneset/GOBP_ORGANIC_CYCLIC_COMPOUND_CATABOLIC_PROCESS.html	1.89958	0	0.00458963
GOBP_NEGATIVE_REGULATION_OF_TRANSMEMBRANE_TRANSPORT	http://www.gsea-msigdb.org/gsea/msigdb/human/geneset/GOBP_NEGATIVE_REGULATION_OF_TRANSMEMBRANE_TRANSPORT.html	1.89789	0.00115607	0.00458582
GOBP_PROTEIN_LOCALIZATION_TO_SYNAPSE	http://www.gsea-msigdb.org/gsea/msigdb/human/geneset/GOBP_PROTEIN_LOCALIZATION_TO_SYNAPSE.html	1.89018	0	0.00512799
GOBP_RIBONUCLEOPROTEIN_COMPLEX_SUBUNIT_ORGANIZATION	http://www.gsea-msigdb.org/gsea/msigdb/human/geneset/GOBP_RIBONUCLEOPROTEIN_COMPLEX_SUBUNIT_ORGANIZATION.html	1.8882	0	0.00517323
GOBP_ELECTRON_TRANSPORT_CHAIN	http://www.gsea-msigdb.org/gsea/msigdb/human/geneset/GOBP_ELECTRON_TRANSPORT_CHAIN.html	1.88274	0	0.00554947
GOBP_LEARNING	http://www.gsea-msigdb.org/gsea/msigdb/human/geneset/GOBP_LEARNING.html	1.88115	0	0.0055668
GOBP_POSITIVE_REGULATION_OF_CALCIUM_ION_TRANSMEMBRANE_TRANSPORTER_ACTIVITY	http://www.gsea-msigdb.org/gsea/msigdb/human/geneset/GOBP_POSITIVE_REGULATION_OF_CALCIUM_ION_TRANSMEMBRANE_TRANSPORTER_ACTIVITY.html	1.87742	0	0.00583172
GOBP_PHAGOSOME_MATURATION	http://www.gsea-msigdb.org/gsea/msigdb/human/geneset/GOBP_PHAGOSOME_MATURATION.html	1.87508	0	0.00594062
GOBP_POSITIVE_REGULATION_OF_SYNAPTIC_TRANSMISSION	http://www.gsea-msigdb.org/gsea/msigdb/human/geneset/GOBP_POSITIVE_REGULATION_OF_SYNAPTIC_TRANSMISSION.html	1.87424	0	0.00589981
GOBP_SYNAPSE_ASSEMBLY	http://www.gsea-msigdb.org/gsea/msigdb/human/geneset/GOBP_SYNAPSE_ASSEMBLY.html	1.87406	0	0.00584945
GOBP_PEPTIDYL_CYSTEINE_MODIFICATION	http://www.gsea-msigdb.org/gsea/msigdb/human/geneset/GOBP_PEPTIDYL_CYSTEINE_MODIFICATION.html	1.86355	0	0.00685761
GOBP_POSITIVE_REGULATION_OF_CATION_CHANNEL_ACTIVITY	http://www.gsea-msigdb.org/gsea/msigdb/human/geneset/GOBP_POSITIVE_REGULATION_OF_CATION_CHANNEL_ACTIVITY.html	1.86038	0	0.0070103
GOBP_EPHRIN_RECEPTOR_SIGNALING_PATHWAY	http://www.gsea-msigdb.org/gsea/msigdb/human/geneset/GOBP_EPHRIN_RECEPTOR_SIGNALING_PATHWAY.html	1.85113	0.0011534	0.00807931
GOBP_NEURON_RECOGNITION	http://www.gsea-msigdb.org/gsea/msigdb/human/geneset/GOBP_NEURON_RECOGNITION.html	1.84997	0	0.00814482
GOBP_SYNAPTIC_TRANSMISSION_GLUTAMATERGIC	http://www.gsea-msigdb.org/gsea/msigdb/human/geneset/GOBP_SYNAPTIC_TRANSMISSION_GLUTAMATERGIC.html	1.84896	0	0.00815014
GOBP_REGULATION_OF_NEURONAL_SYNAPTIC_PLASTICITY	http://www.gsea-msigdb.org/gsea/msigdb/human/geneset/GOBP_REGULATION_OF_NEURONAL_SYNAPTIC_PLASTICITY.html	1.84883	0.00253165	0.00808765
GOBP_MRNA_METABOLIC_PROCESS	http://www.gsea-msigdb.org/gsea/msigdb/human/geneset/GOBP_MRNA_METABOLIC_PROCESS.html	1.84361	0	0.00856263
GOBP_SYNAPSE_ORGANIZATION	http://www.gsea-msigdb.org/gsea/msigdb/human/geneset/GOBP_SYNAPSE_ORGANIZATION.html	1.84165	0	0.00873424
GOBP_CELL_COMMUNICATION_BY_ELECTRICAL_COUPLING	http://www.gsea-msigdb.org/gsea/msigdb/human/geneset/GOBP_CELL_COMMUNICATION_BY_ELECTRICAL_COUPLING.html	1.84163	0	0.00863931
GOBP_RECEPTOR_LOCALIZATION_TO_SYNAPSE	http://www.gsea-msigdb.org/gsea/msigdb/human/geneset/GOBP_RECEPTOR_LOCALIZATION_TO_SYNAPSE.html	1.84129	0.00116959	0.00856493
GOBP_TRANSFERRIN_TRANSPORT	http://www.gsea-msigdb.org/gsea/msigdb/human/geneset/GOBP_TRANSFERRIN_TRANSPORT.html	1.83674	0.00256082	0.00883097
GOBP_LONG_TERM_SYNAPTIC_POTENTIATION	http://www.gsea-msigdb.org/gsea/msigdb/human/geneset/GOBP_LONG_TERM_SYNAPTIC_POTENTIATION.html	1.83239	0	0.00930073
GOBP_REGULATION_OF_UBIQUITIN_PROTEIN_TRANSFERASE_ACTIVITY	http://www.gsea-msigdb.org/gsea/msigdb/human/geneset/GOBP_REGULATION_OF_UBIQUITIN_PROTEIN_TRANSFERASE_ACTIVITY.html	1.82854	0.00242718	0.00977807
GOBP_REGULATION_OF_SODIUM_ION_TRANSMEMBRANE_TRANSPORTER_ACTIVITY	http://www.gsea-msigdb.org/gsea/msigdb/human/geneset/GOBP_REGULATION_OF_SODIUM_ION_TRANSMEMBRANE_TRANSPORTER_ACTIVITY.html	1.82582	0.00243309	0.0100779
GOBP_CELLULAR_AMIDE_METABOLIC_PROCESS	http://www.gsea-msigdb.org/gsea/msigdb/human/geneset/GOBP_CELLULAR_AMIDE_METABOLIC_PROCESS.html	1.82414	0	0.0101682
GOBP_PROTEIN_LOCALIZATION_TO_CELL_JUNCTION	http://www.gsea-msigdb.org/gsea/msigdb/human/geneset/GOBP_PROTEIN_LOCALIZATION_TO_CELL_JUNCTION.html	1.82335	0	0.010248
GOBP_CYTOPLASMIC_TRANSLATIONAL_INITIATION	http://www.gsea-msigdb.org/gsea/msigdb/human/geneset/GOBP_CYTOPLASMIC_TRANSLATIONAL_INITIATION.html	1.8231	0.00123916	0.0101541
GOBP_RESPONSE_TO_INTERLEUKIN_12	http://www.gsea-msigdb.org/gsea/msigdb/human/geneset/GOBP_RESPONSE_TO_INTERLEUKIN_12.html	1.81478	0	0.0112316
GOBP_POTASSIUM_ION_TRANSPORT	http://www.gsea-msigdb.org/gsea/msigdb/human/geneset/GOBP_POTASSIUM_ION_TRANSPORT.html	1.81235	0	0.0115685
GOBP_REGULATION_OF_SYNAPTIC_TRANSMISSION_GLUTAMATERGIC	http://www.gsea-msigdb.org/gsea/msigdb/human/geneset/GOBP_REGULATION_OF_SYNAPTIC_TRANSMISSION_GLUTAMATERGIC.html	1.81092	0.00125628	0.0116737
GOBP_CALCIUM_ION_IMPORT	http://www.gsea-msigdb.org/gsea/msigdb/human/geneset/GOBP_CALCIUM_ION_IMPORT.html	1.80497	0	0.0125157
GOBP_SYNAPTIC_VESICLE_TRANSPORT	http://www.gsea-msigdb.org/gsea/msigdb/human/geneset/GOBP_SYNAPTIC_VESICLE_TRANSPORT.html	1.80429	0.00119617	0.0125852
GOBP_TRANSMEMBRANE_TRANSPORT	http://www.gsea-msigdb.org/gsea/msigdb/human/geneset/GOBP_TRANSMEMBRANE_TRANSPORT.html	1.80004	0	0.0132394
GOBP_REGULATION_OF_HEART_RATE	http://www.gsea-msigdb.org/gsea/msigdb/human/geneset/GOBP_REGULATION_OF_HEART_RATE.html	1.79505	0	0.0140185
GOBP_CELLULAR_RESPIRATION	http://www.gsea-msigdb.org/gsea/msigdb/human/geneset/GOBP_CELLULAR_RESPIRATION.html	1.79362	0	0.0141601
GOBP_RRNA_METABOLIC_PROCESS	http://www.gsea-msigdb.org/gsea/msigdb/human/geneset/GOBP_RRNA_METABOLIC_PROCESS.html	1.79069	0	0.0145912
GOBP_DENDRITIC_SPINE_MORPHOGENESIS	http://www.gsea-msigdb.org/gsea/msigdb/human/geneset/GOBP_DENDRITIC_SPINE_MORPHOGENESIS.html	1.78761	0.00116279	0.0150859
GOBP_SODIUM_ION_TRANSPORT	http://www.gsea-msigdb.org/gsea/msigdb/human/geneset/GOBP_SODIUM_ION_TRANSPORT.html	1.78554	0	0.0153703
GOBP_AMINE_TRANSPORT	http://www.gsea-msigdb.org/gsea/msigdb/human/geneset/GOBP_AMINE_TRANSPORT.html	1.78429	0.00631313	0.0154329
GOBP_NEGATIVE_REGULATION_OF_SYNAPTIC_TRANSMISSION	http://www.gsea-msigdb.org/gsea/msigdb/human/geneset/GOBP_NEGATIVE_REGULATION_OF_SYNAPTIC_TRANSMISSION.html	1.78373	0.0034965	0.0154111
GOBP_POSTSYNAPSE_ORGANIZATION	http://www.gsea-msigdb.org/gsea/msigdb/human/geneset/GOBP_POSTSYNAPSE_ORGANIZATION.html	1.7811	0	0.0159486
GOBP_NADH_DEHYDROGENASE_COMPLEX_ASSEMBLY	http://www.gsea-msigdb.org/gsea/msigdb/human/geneset/GOBP_NADH_DEHYDROGENASE_COMPLEX_ASSEMBLY.html	1.7785	0.00242718	0.0162973
GOBP_ESTABLISHMENT_OF_PROTEIN_LOCALIZATION_TO_MITOCHONDRIAL_MEMBRANE	http://www.gsea-msigdb.org/gsea/msigdb/human/geneset/GOBP_ESTABLISHMENT_OF_PROTEIN_LOCALIZATION_TO_MITOCHONDRIAL_MEMBRANE.html	1.77314	0.00483676	0.0173676
GOBP_INORGANIC_ANION_TRANSPORT	http://www.gsea-msigdb.org/gsea/msigdb/human/geneset/GOBP_INORGANIC_ANION_TRANSPORT.html	1.77022	0.00354191	0.0178155
GOBP_REGULATION_OF_ACTION_POTENTIAL	http://www.gsea-msigdb.org/gsea/msigdb/human/geneset/GOBP_REGULATION_OF_ACTION_POTENTIAL.html	1.77009	0.00123153	0.0177011
GOBP_LOCOMOTORY_BEHAVIOR	http://www.gsea-msigdb.org/gsea/msigdb/human/geneset/GOBP_LOCOMOTORY_BEHAVIOR.html	1.76381	0	0.0190081
GOBP_BIOLOGICAL_PROCESS_INVOLVED_IN_SYMBIOTIC_INTERACTION	http://www.gsea-msigdb.org/gsea/msigdb/human/geneset/GOBP_BIOLOGICAL_PROCESS_INVOLVED_IN_SYMBIOTIC_INTERACTION.html	1.76026	0	0.0196607
GOBP_REGULATION_OF_DENDRITIC_SPINE_MORPHOGENESIS	http://www.gsea-msigdb.org/gsea/msigdb/human/geneset/GOBP_REGULATION_OF_DENDRITIC_SPINE_MORPHOGENESIS.html	1.75622	0.00362757	0.0205307
GOBP_MEMBRANE_BIOGENESIS	http://www.gsea-msigdb.org/gsea/msigdb/human/geneset/GOBP_MEMBRANE_BIOGENESIS.html	1.75586	0.00242718	0.0204542
GOBP_SUBSTANTIA_NIGRA_DEVELOPMENT	http://www.gsea-msigdb.org/gsea/msigdb/human/geneset/GOBP_SUBSTANTIA_NIGRA_DEVELOPMENT.html	1.7539	0.00481928	0.0209187
GOBP_CELL_COMMUNICATION_INVOLVED_IN_CARDIAC_CONDUCTION	http://www.gsea-msigdb.org/gsea/msigdb/human/geneset/GOBP_CELL_COMMUNICATION_INVOLVED_IN_CARDIAC_CONDUCTION.html	1.7477	0.00119904	0.022599
GOBP_BEHAVIOR	http://www.gsea-msigdb.org/gsea/msigdb/human/geneset/GOBP_BEHAVIOR.html	1.74232	0	0.0239972
GOBP_CALCIUM_MEDIATED_SIGNALING	http://www.gsea-msigdb.org/gsea/msigdb/human/geneset/GOBP_CALCIUM_MEDIATED_SIGNALING.html	1.74223	0	0.023834
GOBP_REGULATION_OF_SODIUM_ION_TRANSMEMBRANE_TRANSPORT	http://www.gsea-msigdb.org/gsea/msigdb/human/geneset/GOBP_REGULATION_OF_SODIUM_ION_TRANSMEMBRANE_TRANSPORT.html	1.73729	0.00353774	0.0250379
GOBP_DENDRITIC_SPINE_DEVELOPMENT	http://www.gsea-msigdb.org/gsea/msigdb/human/geneset/GOBP_DENDRITIC_SPINE_DEVELOPMENT.html	1.73631	0.00109051	0.025098
GOBP_REGULATION_OF_SYNAPSE_ASSEMBLY	http://www.gsea-msigdb.org/gsea/msigdb/human/geneset/GOBP_REGULATION_OF_SYNAPSE_ASSEMBLY.html	1.73509	0.00231214	0.0252705
GOBP_ACIDIC_AMINO_ACID_TRANSPORT	http://www.gsea-msigdb.org/gsea/msigdb/human/geneset/GOBP_ACIDIC_AMINO_ACID_TRANSPORT.html	1.73403	0.00352526	0.0253614
GOBP_COGNITION	http://www.gsea-msigdb.org/gsea/msigdb/human/geneset/GOBP_COGNITION.html	1.72482	0.00105597	0.0281284
GOBP_EXOCYTOSIS	http://www.gsea-msigdb.org/gsea/msigdb/human/geneset/GOBP_EXOCYTOSIS.html	1.72374	0	0.0283261
GOBP_CARDIAC_MUSCLE_CELL_ACTION_POTENTIAL_INVOLVED_IN_CONTRACTION	http://www.gsea-msigdb.org/gsea/msigdb/human/geneset/GOBP_CARDIAC_MUSCLE_CELL_ACTION_POTENTIAL_INVOLVED_IN_CONTRACTION.html	1.72282	0.00645161	0.0283851
GOBP_CARDIAC_MUSCLE_CONTRACTION	http://www.gsea-msigdb.org/gsea/msigdb/human/geneset/GOBP_CARDIAC_MUSCLE_CONTRACTION.html	1.72217	0.002331	0.0283337
GOBP_MEMBRANE_FUSION	http://www.gsea-msigdb.org/gsea/msigdb/human/geneset/GOBP_MEMBRANE_FUSION.html	1.71707	0	0.0299317
GOBP_CELLULAR_MONOVALENT_INORGANIC_CATION_HOMEOSTASIS	http://www.gsea-msigdb.org/gsea/msigdb/human/geneset/GOBP_CELLULAR_MONOVALENT_INORGANIC_CATION_HOMEOSTASIS.html	1.71282	0.0023753	0.031271
GOBP_STRIATED_MUSCLE_CONTRACTION	http://www.gsea-msigdb.org/gsea/msigdb/human/geneset/GOBP_STRIATED_MUSCLE_CONTRACTION.html	1.7059	0.00337838	0.0337536
GOBP_SECOND_MESSENGER_MEDIATED_SIGNALING	http://www.gsea-msigdb.org/gsea/msigdb/human/geneset/GOBP_SECOND_MESSENGER_MEDIATED_SIGNALING.html	1.70306	0	0.0345775
GOBP_TRANSLATIONAL_ELONGATION	http://www.gsea-msigdb.org/gsea/msigdb/human/geneset/GOBP_TRANSLATIONAL_ELONGATION.html	1.69923	0.00116414	0.0358675
GOBP_REGULATION_OF_SODIUM_ION_TRANSPORT	http://www.gsea-msigdb.org/gsea/msigdb/human/geneset/GOBP_REGULATION_OF_SODIUM_ION_TRANSPORT.html	1.69585	0.00112867	0.0370832
GOBP_REGULATION_OF_CALCIUM_ION_TRANSMEMBRANE_TRANSPORT	http://www.gsea-msigdb.org/gsea/msigdb/human/geneset/GOBP_REGULATION_OF_CALCIUM_ION_TRANSMEMBRANE_TRANSPORT.html	1.69575	0.00111857	0.036857
GOBP_REGULATION_OF_NERVOUS_SYSTEM_PROCESS	http://www.gsea-msigdb.org/gsea/msigdb/human/geneset/GOBP_REGULATION_OF_NERVOUS_SYSTEM_PROCESS.html	1.69317	0.00231481	0.0377814
GOBP_ACTIN_MEDIATED_CELL_CONTRACTION	http://www.gsea-msigdb.org/gsea/msigdb/human/geneset/GOBP_ACTIN_MEDIATED_CELL_CONTRACTION.html	1.69255	0.00688863	0.0378365
GOBP_REGULATION_OF_AXONOGENESIS	http://www.gsea-msigdb.org/gsea/msigdb/human/geneset/GOBP_REGULATION_OF_AXONOGENESIS.html	1.68849	0	0.0394351
GOBP_AEROBIC_RESPIRATION	http://www.gsea-msigdb.org/gsea/msigdb/human/geneset/GOBP_AEROBIC_RESPIRATION.html	1.68789	0	0.0394009
GOBP_ANTIGEN_PROCESSING_AND_PRESENTATION_OF_PEPTIDE_OR_POLYSACCHARIDE_ANTIGEN_VIA_MHC_CLASS_II	http://www.gsea-msigdb.org/gsea/msigdb/human/geneset/GOBP_ANTIGEN_PROCESSING_AND_PRESENTATION_OF_PEPTIDE_OR_POLYSACCHARIDE_ANTIGEN_VIA_MHC_CLASS_II.html	1.68769	0.00468933	0.0392552
GOBP_ANAPHASE_PROMOTING_COMPLEX_DEPENDENT_CATABOLIC_PROCESS	http://www.gsea-msigdb.org/gsea/msigdb/human/geneset/GOBP_ANAPHASE_PROMOTING_COMPLEX_DEPENDENT_CATABOLIC_PROCESS.html	1.68268	0.00714286	0.0412763
GOBP_POSITIVE_REGULATION_OF_OXIDOREDUCTASE_ACTIVITY	http://www.gsea-msigdb.org/gsea/msigdb/human/geneset/GOBP_POSITIVE_REGULATION_OF_OXIDOREDUCTASE_ACTIVITY.html	1.6807	0.00887199	0.0420289
GOBP_DENDRITE_DEVELOPMENT	http://www.gsea-msigdb.org/gsea/msigdb/human/geneset/GOBP_DENDRITE_DEVELOPMENT.html	1.68049	0	0.041828
GOBP_GLUTAMATE_SECRETION	http://www.gsea-msigdb.org/gsea/msigdb/human/geneset/GOBP_GLUTAMATE_SECRETION.html	1.67973	0.00504414	0.0418423
GOBP_POSITIVE_REGULATION_OF_TRANSMEMBRANE_TRANSPORT	http://www.gsea-msigdb.org/gsea/msigdb/human/geneset/GOBP_POSITIVE_REGULATION_OF_TRANSMEMBRANE_TRANSPORT.html	1.67973	0	0.0415652
GOBP_CRISTAE_FORMATION	http://www.gsea-msigdb.org/gsea/msigdb/human/geneset/GOBP_CRISTAE_FORMATION.html	1.67696	0.0127065	0.0426817
GOBP_ESTABLISHMENT_OF_PROTEIN_LOCALIZATION_TO_PLASMA_MEMBRANE	http://www.gsea-msigdb.org/gsea/msigdb/human/geneset/GOBP_ESTABLISHMENT_OF_PROTEIN_LOCALIZATION_TO_PLASMA_MEMBRANE.html	1.67455	0.00592417	0.0434514
GOBP_REGULATION_OF_PROTEIN_POLYMERIZATION	http://www.gsea-msigdb.org/gsea/msigdb/human/geneset/GOBP_REGULATION_OF_PROTEIN_POLYMERIZATION.html	1.6695	0.00209864	0.0456602
GOBP_VESICLE_LOCALIZATION	http://www.gsea-msigdb.org/gsea/msigdb/human/geneset/GOBP_VESICLE_LOCALIZATION.html	1.66735	0.00104822	0.0464229
GOBP_NEGATIVE_REGULATION_OF_ION_TRANSPORT	http://www.gsea-msigdb.org/gsea/msigdb/human/geneset/GOBP_NEGATIVE_REGULATION_OF_ION_TRANSPORT.html	1.66562	0.00212993	0.0470595
GOBP_NEURON_PROJECTION_EXTENSION_INVOLVED_IN_NEURON_PROJECTION_GUIDANCE	http://www.gsea-msigdb.org/gsea/msigdb/human/geneset/GOBP_NEURON_PROJECTION_EXTENSION_INVOLVED_IN_NEURON_PROJECTION_GUIDANCE.html	1.66427	0.00762389	0.0473909
GOBP_PROTEIN_LOCALIZATION_TO_ORGANELLE	http://www.gsea-msigdb.org/gsea/msigdb/human/geneset/GOBP_PROTEIN_LOCALIZATION_TO_ORGANELLE.html	1.66347	0	0.0475102
GOBP_NEGATIVE_REGULATION_OF_CHEMOTAXIS	http://www.gsea-msigdb.org/gsea/msigdb/human/geneset/GOBP_NEGATIVE_REGULATION_OF_CHEMOTAXIS.html	1.66043	0.0126904	0.0490381
GOBP_NEGATIVE_REGULATION_OF_TRANSPORT	http://www.gsea-msigdb.org/gsea/msigdb/human/geneset/GOBP_NEGATIVE_REGULATION_OF_TRANSPORT.html	1.65796	0.00104058	0.0501053
GOBP_DICARBOXYLIC_ACID_TRANSPORT	http://www.gsea-msigdb.org/gsea/msigdb/human/geneset/GOBP_DICARBOXYLIC_ACID_TRANSPORT.html	1.65532	0.00234742	0.051201
GOBP_NEGATIVE_REGULATION_OF_CATION_TRANSMEMBRANE_TRANSPORT	http://www.gsea-msigdb.org/gsea/msigdb/human/geneset/GOBP_NEGATIVE_REGULATION_OF_CATION_TRANSMEMBRANE_TRANSPORT.html	1.65311	0.00705053	0.0521457
GOBP_DENDRITE_EXTENSION	http://www.gsea-msigdb.org/gsea/msigdb/human/geneset/GOBP_DENDRITE_EXTENSION.html	1.65191	0.0110294	0.052503
GOBP_SIGNAL_RELEASE	http://www.gsea-msigdb.org/gsea/msigdb/human/geneset/GOBP_SIGNAL_RELEASE.html	1.64756	0	0.0546211
GOBP_POSITIVE_REGULATION_OF_PROTEIN_DEPHOSPHORYLATION	http://www.gsea-msigdb.org/gsea/msigdb/human/geneset/GOBP_POSITIVE_REGULATION_OF_PROTEIN_DEPHOSPHORYLATION.html	1.64348	0.0174564	0.0568168
GOBP_CELLULAR_BIOGENIC_AMINE_METABOLIC_PROCESS	http://www.gsea-msigdb.org/gsea/msigdb/human/geneset/GOBP_CELLULAR_BIOGENIC_AMINE_METABOLIC_PROCESS.html	1.64249	0.0121212	0.0571599
GOBP_REGULATION_OF_STRIATED_MUSCLE_CONTRACTION	http://www.gsea-msigdb.org/gsea/msigdb/human/geneset/GOBP_REGULATION_OF_STRIATED_MUSCLE_CONTRACTION.html	1.64224	0.00612745	0.0570239
GOBP_EXOCYTIC_PROCESS	http://www.gsea-msigdb.org/gsea/msigdb/human/geneset/GOBP_EXOCYTIC_PROCESS.html	1.64031	0.0150812	0.0579207
GOBP_CELLULAR_ION_HOMEOSTASIS	http://www.gsea-msigdb.org/gsea/msigdb/human/geneset/GOBP_CELLULAR_ION_HOMEOSTASIS.html	1.64011	0	0.0576849
GOBP_AMINO_ACID_TRANSPORT	http://www.gsea-msigdb.org/gsea/msigdb/human/geneset/GOBP_AMINO_ACID_TRANSPORT.html	1.63747	0.003386	0.0590304
GOBP_ACTIN_POLYMERIZATION_OR_DEPOLYMERIZATION	http://www.gsea-msigdb.org/gsea/msigdb/human/geneset/GOBP_ACTIN_POLYMERIZATION_OR_DEPOLYMERIZATION.html	1.63733	0.00105485	0.0587758
GOBP_ACTIN_FILAMENT_BASED_MOVEMENT	http://www.gsea-msigdb.org/gsea/msigdb/human/geneset/GOBP_ACTIN_FILAMENT_BASED_MOVEMENT.html	1.63633	0.00784753	0.0590855
GOBP_REGULATION_OF_CARDIAC_MUSCLE_CONTRACTION	http://www.gsea-msigdb.org/gsea/msigdb/human/geneset/GOBP_REGULATION_OF_CARDIAC_MUSCLE_CONTRACTION.html	1.6358	0.00846433	0.0591421
GOBP_REGULATION_OF_AMYLOID_PRECURSOR_PROTEIN_CATABOLIC_PROCESS	http://www.gsea-msigdb.org/gsea/msigdb/human/geneset/GOBP_REGULATION_OF_AMYLOID_PRECURSOR_PROTEIN_CATABOLIC_PROCESS.html	1.63439	0.0111386	0.0596741
GOBP_NEURON_PROJECTION_EXTENSION	http://www.gsea-msigdb.org/gsea/msigdb/human/geneset/GOBP_NEURON_PROJECTION_EXTENSION.html	1.63414	0.00108225	0.0594567
GOBP_NEURAL_NUCLEUS_DEVELOPMENT	http://www.gsea-msigdb.org/gsea/msigdb/human/geneset/GOBP_NEURAL_NUCLEUS_DEVELOPMENT.html	1.63269	0.00822562	0.0600789
GOBP_RNA_SPLICING_VIA_TRANSESTERIFICATION_REACTIONS	http://www.gsea-msigdb.org/gsea/msigdb/human/geneset/GOBP_RNA_SPLICING_VIA_TRANSESTERIFICATION_REACTIONS.html	1.63264	0	0.0597735
GOBP_DENDRITE_MORPHOGENESIS	http://www.gsea-msigdb.org/gsea/msigdb/human/geneset/GOBP_DENDRITE_MORPHOGENESIS.html	1.63223	0.00434311	0.0596696
GOBP_REGULATION_OF_ION_TRANSPORT	http://www.gsea-msigdb.org/gsea/msigdb/human/geneset/GOBP_REGULATION_OF_ION_TRANSPORT.html	1.63021	0	0.0605779
GOBP_RNA_SPLICING	http://www.gsea-msigdb.org/gsea/msigdb/human/geneset/GOBP_RNA_SPLICING.html	1.62833	0	0.0612668
GOBP_NEGATIVE_REGULATION_OF_RNA_SPLICING	http://www.gsea-msigdb.org/gsea/msigdb/human/geneset/GOBP_NEGATIVE_REGULATION_OF_RNA_SPLICING.html	1.62769	0.0102564	0.061281
GOBP_ADULT_BEHAVIOR	http://www.gsea-msigdb.org/gsea/msigdb/human/geneset/GOBP_ADULT_BEHAVIOR.html	1.62685	0.00812065	0.0615404
GOBP_REGULATION_OF_METAL_ION_TRANSPORT	http://www.gsea-msigdb.org/gsea/msigdb/human/geneset/GOBP_REGULATION_OF_METAL_ION_TRANSPORT.html	1.62496	0.00108932	0.0623867
GOBP_MEMBRANE_ORGANIZATION	http://www.gsea-msigdb.org/gsea/msigdb/human/geneset/GOBP_MEMBRANE_ORGANIZATION.html	1.62171	0	0.0641972
GOBP_REGULATION_OF_ACTIN_FILAMENT_LENGTH	http://www.gsea-msigdb.org/gsea/msigdb/human/geneset/GOBP_REGULATION_OF_ACTIN_FILAMENT_LENGTH.html	1.61848	0.00429646	0.0659851
GOBP_FC_RECEPTOR_MEDIATED_STIMULATORY_SIGNALING_PATHWAY	http://www.gsea-msigdb.org/gsea/msigdb/human/geneset/GOBP_FC_RECEPTOR_MEDIATED_STIMULATORY_SIGNALING_PATHWAY.html	1.61582	0.00561167	0.0675401
GOBP_ANTIGEN_PROCESSING_AND_PRESENTATION_OF_PEPTIDE_ANTIGEN	http://www.gsea-msigdb.org/gsea/msigdb/human/geneset/GOBP_ANTIGEN_PROCESSING_AND_PRESENTATION_OF_PEPTIDE_ANTIGEN.html	1.61369	0.00110497	0.0686162
GOBP_HOMOPHILIC_CELL_ADHESION_VIA_PLASMA_MEMBRANE_ADHESION_MOLECULES	http://www.gsea-msigdb.org/gsea/msigdb/human/geneset/GOBP_HOMOPHILIC_CELL_ADHESION_VIA_PLASMA_MEMBRANE_ADHESION_MOLECULES.html	1.61212	0.00588235	0.0693925
GOBP_CELL_CELL_ADHESION_VIA_PLASMA_MEMBRANE_ADHESION_MOLECULES	http://www.gsea-msigdb.org/gsea/msigdb/human/geneset/GOBP_CELL_CELL_ADHESION_VIA_PLASMA_MEMBRANE_ADHESION_MOLECULES.html	1.61185	0.00219058	0.0692489
GOBP_NEGATIVE_REGULATION_OF_AXONOGENESIS	http://www.gsea-msigdb.org/gsea/msigdb/human/geneset/GOBP_NEGATIVE_REGULATION_OF_AXONOGENESIS.html	1.60992	0.00715137	0.0702045
GOBP_POSITIVE_REGULATION_OF_SODIUM_ION_TRANSPORT	http://www.gsea-msigdb.org/gsea/msigdb/human/geneset/GOBP_POSITIVE_REGULATION_OF_SODIUM_ION_TRANSPORT.html	1.60933	0.0201511	0.0701708
GOBP_REGULATION_OF_SECRETION	http://www.gsea-msigdb.org/gsea/msigdb/human/geneset/GOBP_REGULATION_OF_SECRETION.html	1.6088	0	0.0701647
GOBP_IRON_ION_TRANSPORT	http://www.gsea-msigdb.org/gsea/msigdb/human/geneset/GOBP_IRON_ION_TRANSPORT.html	1.60833	0.00960384	0.0701183
GOBP_POSITIVE_REGULATION_OF_DEPHOSPHORYLATION	http://www.gsea-msigdb.org/gsea/msigdb/human/geneset/GOBP_POSITIVE_REGULATION_OF_DEPHOSPHORYLATION.html	1.60594	0.0110294	0.0715115
GOBP_ION_HOMEOSTASIS	http://www.gsea-msigdb.org/gsea/msigdb/human/geneset/GOBP_ION_HOMEOSTASIS.html	1.60459	0	0.0721385
GOBP_POSITIVE_REGULATION_OF_PROTEIN_POLYMERIZATION	http://www.gsea-msigdb.org/gsea/msigdb/human/geneset/GOBP_POSITIVE_REGULATION_OF_PROTEIN_POLYMERIZATION.html	1.60156	0.00884956	0.073811
GOBP_REGULATION_OF_DENDRITIC_SPINE_DEVELOPMENT	http://www.gsea-msigdb.org/gsea/msigdb/human/geneset/GOBP_REGULATION_OF_DENDRITIC_SPINE_DEVELOPMENT.html	1.60111	0.0129108	0.0737167
GOBP_POSITIVE_REGULATION_OF_EXOCYTOSIS	http://www.gsea-msigdb.org/gsea/msigdb/human/geneset/GOBP_POSITIVE_REGULATION_OF_EXOCYTOSIS.html	1.60081	0.0127907	0.0736141
GOBP_MEMORY	http://www.gsea-msigdb.org/gsea/msigdb/human/geneset/GOBP_MEMORY.html	1.60013	0.0105018	0.0737895
GOBP_MONOCARBOXYLIC_ACID_TRANSPORT	http://www.gsea-msigdb.org/gsea/msigdb/human/geneset/GOBP_MONOCARBOXYLIC_ACID_TRANSPORT.html	1.59912	0.00554324	0.0742
GOBP_NEGATIVE_REGULATION_OF_UBIQUITIN_DEPENDENT_PROTEIN_CATABOLIC_PROCESS	http://www.gsea-msigdb.org/gsea/msigdb/human/geneset/GOBP_NEGATIVE_REGULATION_OF_UBIQUITIN_DEPENDENT_PROTEIN_CATABOLIC_PROCESS.html	1.59802	0.0142857	0.0746157
GOBP_POSITIVE_REGULATION_OF_AXONOGENESIS	http://www.gsea-msigdb.org/gsea/msigdb/human/geneset/GOBP_POSITIVE_REGULATION_OF_AXONOGENESIS.html	1.59554	0.0103806	0.0761064
GOBP_NERVOUS_SYSTEM_PROCESS	http://www.gsea-msigdb.org/gsea/msigdb/human/geneset/GOBP_NERVOUS_SYSTEM_PROCESS.html	1.59413	0	0.0768518
GOBP_REGULATION_OF_SUPRAMOLECULAR_FIBER_ORGANIZATION	http://www.gsea-msigdb.org/gsea/msigdb/human/geneset/GOBP_REGULATION_OF_SUPRAMOLECULAR_FIBER_ORGANIZATION.html	1.59387	0	0.0766397
GOBP_REGULATION_OF_VESICLE_MEDIATED_TRANSPORT	http://www.gsea-msigdb.org/gsea/msigdb/human/geneset/GOBP_REGULATION_OF_VESICLE_MEDIATED_TRANSPORT.html	1.59057	0	0.0788017
GOBP_CELL_MORPHOGENESIS_INVOLVED_IN_NEURON_DIFFERENTIATION	http://www.gsea-msigdb.org/gsea/msigdb/human/geneset/GOBP_CELL_MORPHOGENESIS_INVOLVED_IN_NEURON_DIFFERENTIATION.html	1.59028	0	0.0786114
GOBP_NEGATIVE_REGULATION_OF_GENE_EXPRESSION	http://www.gsea-msigdb.org/gsea/msigdb/human/geneset/GOBP_NEGATIVE_REGULATION_OF_GENE_EXPRESSION.html	1.58657	0	0.0810972
GOBP_RESPONSE_TO_CALCIUM_ION	http://www.gsea-msigdb.org/gsea/msigdb/human/geneset/GOBP_RESPONSE_TO_CALCIUM_ION.html	1.58632	0.00443459	0.0809231
GOBP_MONOVALENT_INORGANIC_CATION_HOMEOSTASIS	http://www.gsea-msigdb.org/gsea/msigdb/human/geneset/GOBP_MONOVALENT_INORGANIC_CATION_HOMEOSTASIS.html	1.58578	0.00563063	0.0809313
GOBP_REGULATION_OF_ACTIN_FILAMENT_ORGANIZATION	http://www.gsea-msigdb.org/gsea/msigdb/human/geneset/GOBP_REGULATION_OF_ACTIN_FILAMENT_ORGANIZATION.html	1.58159	0.00105263	0.0839528
GOBP_CELLULAR_PROTEIN_CONTAINING_COMPLEX_ASSEMBLY	http://www.gsea-msigdb.org/gsea/msigdb/human/geneset/GOBP_CELLULAR_PROTEIN_CONTAINING_COMPLEX_ASSEMBLY.html	1.58081	0	0.084237
GOBP_ATP_BIOSYNTHETIC_PROCESS	http://www.gsea-msigdb.org/gsea/msigdb/human/geneset/GOBP_ATP_BIOSYNTHETIC_PROCESS.html	1.57924	0.0261593	0.0850753
GOBP_NEGATIVE_REGULATION_OF_PROTEOLYSIS_INVOLVED_IN_CELLULAR_PROTEIN_CATABOLIC_PROCESS	http://www.gsea-msigdb.org/gsea/msigdb/human/geneset/GOBP_NEGATIVE_REGULATION_OF_PROTEOLYSIS_INVOLVED_IN_CELLULAR_PROTEIN_CATABOLIC_PROCESS.html	1.57879	0.0118624	0.0850359
GOBP_REGULATION_OF_CALCIUM_ION_TRANSMEMBRANE_TRANSPORTER_ACTIVITY	http://www.gsea-msigdb.org/gsea/msigdb/human/geneset/GOBP_REGULATION_OF_CALCIUM_ION_TRANSMEMBRANE_TRANSPORTER_ACTIVITY.html	1.57744	0.0144578	0.0856828
GOBP_CALCIUM_ION_TRANSPORT	http://www.gsea-msigdb.org/gsea/msigdb/human/geneset/GOBP_CALCIUM_ION_TRANSPORT.html	1.57693	0	0.085709
GOBP_NEGATIVE_REGULATION_OF_PROTEOLYSIS	http://www.gsea-msigdb.org/gsea/msigdb/human/geneset/GOBP_NEGATIVE_REGULATION_OF_PROTEOLYSIS.html	1.5767	0.0021692	0.0855158
GOBP_PH_REDUCTION	http://www.gsea-msigdb.org/gsea/msigdb/human/geneset/GOBP_PH_REDUCTION.html	1.57607	0.025641	0.0856697
GOBP_LIPID_EXPORT_FROM_CELL	http://www.gsea-msigdb.org/gsea/msigdb/human/geneset/GOBP_LIPID_EXPORT_FROM_CELL.html	1.57432	0.0172612	0.0868314
GOBP_MITOCHONDRIAL_RESPIRATORY_CHAIN_COMPLEX_ASSEMBLY	http://www.gsea-msigdb.org/gsea/msigdb/human/geneset/GOBP_MITOCHONDRIAL_RESPIRATORY_CHAIN_COMPLEX_ASSEMBLY.html	1.57123	0.0154394	0.0890474
GOBP_ASSOCIATIVE_LEARNING	http://www.gsea-msigdb.org/gsea/msigdb/human/geneset/GOBP_ASSOCIATIVE_LEARNING.html	1.57083	0.0134146	0.0889639
GOBP_NEGATIVE_REGULATION_OF_CELLULAR_PROTEIN_CATABOLIC_PROCESS	http://www.gsea-msigdb.org/gsea/msigdb/human/geneset/GOBP_NEGATIVE_REGULATION_OF_CELLULAR_PROTEIN_CATABOLIC_PROCESS.html	1.57068	0.0141677	0.0886745
GOBP_DEVELOPMENTAL_CELL_GROWTH	http://www.gsea-msigdb.org/gsea/msigdb/human/geneset/GOBP_DEVELOPMENTAL_CELL_GROWTH.html	1.56796	0.00314795	0.0904649
GOBP_CALCIUM_ION_TRANSMEMBRANE_TRANSPORT	http://www.gsea-msigdb.org/gsea/msigdb/human/geneset/GOBP_CALCIUM_ION_TRANSMEMBRANE_TRANSPORT.html	1.56557	0.00106383	0.092268
GOBP_PROTEIN_LOCALIZATION_TO_POSTSYNAPSE	http://www.gsea-msigdb.org/gsea/msigdb/human/geneset/GOBP_PROTEIN_LOCALIZATION_TO_POSTSYNAPSE.html	1.56528	0.0228426	0.0921449
GOBP_POSITIVE_REGULATION_OF_CYTOSKELETON_ORGANIZATION	http://www.gsea-msigdb.org/gsea/msigdb/human/geneset/GOBP_POSITIVE_REGULATION_OF_CYTOSKELETON_ORGANIZATION.html	1.56293	0.00211193	0.0937895
GOBP_NEGATIVE_REGULATION_OF_TRANSPORTER_ACTIVITY	http://www.gsea-msigdb.org/gsea/msigdb/human/geneset/GOBP_NEGATIVE_REGULATION_OF_TRANSPORTER_ACTIVITY.html	1.56271	0.0168472	0.0935539
GOBP_REGULATION_OF_POTASSIUM_ION_TRANSMEMBRANE_TRANSPORTER_ACTIVITY	http://www.gsea-msigdb.org/gsea/msigdb/human/geneset/GOBP_REGULATION_OF_POTASSIUM_ION_TRANSMEMBRANE_TRANSPORTER_ACTIVITY.html	1.56203	0.0247934	0.0937645
GOBP_PROTEIN_POLYMERIZATION	http://www.gsea-msigdb.org/gsea/msigdb/human/geneset/GOBP_PROTEIN_POLYMERIZATION.html	1.56183	0	0.0935387
GOBP_MITOCHONDRIAL_MEMBRANE_ORGANIZATION	http://www.gsea-msigdb.org/gsea/msigdb/human/geneset/GOBP_MITOCHONDRIAL_MEMBRANE_ORGANIZATION.html	1.55596	0.0077951	0.0982838
GOBP_CELLULAR_HOMEOSTASIS	http://www.gsea-msigdb.org/gsea/msigdb/human/geneset/GOBP_CELLULAR_HOMEOSTASIS.html	1.55245	0	0.101
GOBP_METAL_ION_TRANSPORT	http://www.gsea-msigdb.org/gsea/msigdb/human/geneset/GOBP_METAL_ION_TRANSPORT.html	1.55234	0.0010352	0.100664
GOBP_ORGANELLE_DISASSEMBLY	http://www.gsea-msigdb.org/gsea/msigdb/human/geneset/GOBP_ORGANELLE_DISASSEMBLY.html	1.55159	0.0167785	0.100939
GOBP_CELL_RECOGNITION	http://www.gsea-msigdb.org/gsea/msigdb/human/geneset/GOBP_CELL_RECOGNITION.html	1.55089	0.0194064	0.101157
GOBP_NEUROMUSCULAR_PROCESS	http://www.gsea-msigdb.org/gsea/msigdb/human/geneset/GOBP_NEUROMUSCULAR_PROCESS.html	1.54955	0.0190024	0.10204
GOBP_AUTOPHAGY_OF_MITOCHONDRION	http://www.gsea-msigdb.org/gsea/msigdb/human/geneset/GOBP_AUTOPHAGY_OF_MITOCHONDRION.html	1.54857	0.0117371	0.102534
GOBP_POSITIVE_REGULATION_OF_NERVOUS_SYSTEM_DEVELOPMENT	http://www.gsea-msigdb.org/gsea/msigdb/human/geneset/GOBP_POSITIVE_REGULATION_OF_NERVOUS_SYSTEM_DEVELOPMENT.html	1.54844	0.0031881	0.102224
GOBP_ORGANELLE_MEMBRANE_FUSION	http://www.gsea-msigdb.org/gsea/msigdb/human/geneset/GOBP_ORGANELLE_MEMBRANE_FUSION.html	1.54631	0.0212054	0.103836
GOBP_INNER_MITOCHONDRIAL_MEMBRANE_ORGANIZATION	http://www.gsea-msigdb.org/gsea/msigdb/human/geneset/GOBP_INNER_MITOCHONDRIAL_MEMBRANE_ORGANIZATION.html	1.54614	0.0199501	0.103563
GOBP_REGULATION_OF_MICROTUBULE_POLYMERIZATION	http://www.gsea-msigdb.org/gsea/msigdb/human/geneset/GOBP_REGULATION_OF_MICROTUBULE_POLYMERIZATION.html	1.54578	0.0199063	0.103487
GOBP_DNA_DAMAGE_RESPONSE_DETECTION_OF_DNA_DAMAGE	http://www.gsea-msigdb.org/gsea/msigdb/human/geneset/GOBP_DNA_DAMAGE_RESPONSE_DETECTION_OF_DNA_DAMAGE.html	1.54561	0.0292249	0.103196
GOBP_PROTEIN_DEPOLYMERIZATION	http://www.gsea-msigdb.org/gsea/msigdb/human/geneset/GOBP_PROTEIN_DEPOLYMERIZATION.html	1.54502	0.0121816	0.10329
GOBP_CELL_JUNCTION_ORGANIZATION	http://www.gsea-msigdb.org/gsea/msigdb/human/geneset/GOBP_CELL_JUNCTION_ORGANIZATION.html	1.5448	0	0.103059
GOBP_MIDBRAIN_DEVELOPMENT	http://www.gsea-msigdb.org/gsea/msigdb/human/geneset/GOBP_MIDBRAIN_DEVELOPMENT.html	1.5443	0.0162602	0.103139
GOBP_PROTEIN_CONTAINING_COMPLEX_LOCALIZATION	http://www.gsea-msigdb.org/gsea/msigdb/human/geneset/GOBP_PROTEIN_CONTAINING_COMPLEX_LOCALIZATION.html	1.54179	0	0.105183
GOBP_RNA_PROCESSING	http://www.gsea-msigdb.org/gsea/msigdb/human/geneset/GOBP_RNA_PROCESSING.html	1.53994	0	0.106608
GOBP_NEGATIVE_REGULATION_OF_CELL_GROWTH	http://www.gsea-msigdb.org/gsea/msigdb/human/geneset/GOBP_NEGATIVE_REGULATION_OF_CELL_GROWTH.html	1.53922	0.00994475	0.106858
GOBP_ANTIGEN_PROCESSING_AND_PRESENTATION	http://www.gsea-msigdb.org/gsea/msigdb/human/geneset/GOBP_ANTIGEN_PROCESSING_AND_PRESENTATION.html	1.53911	0.0054407	0.10653
GOBP_VESICLE_CYTOSKELETAL_TRAFFICKING	http://www.gsea-msigdb.org/gsea/msigdb/human/geneset/GOBP_VESICLE_CYTOSKELETAL_TRAFFICKING.html	1.53828	0.0211516	0.106969
GOBP_SEMAPHORIN_PLEXIN_SIGNALING_PATHWAY	http://www.gsea-msigdb.org/gsea/msigdb/human/geneset/GOBP_SEMAPHORIN_PLEXIN_SIGNALING_PATHWAY.html	1.53827	0.0282413	0.106546
GOBP_REGULATION_OF_DENDRITE_MORPHOGENESIS	http://www.gsea-msigdb.org/gsea/msigdb/human/geneset/GOBP_REGULATION_OF_DENDRITE_MORPHOGENESIS.html	1.53551	0.0235294	0.10902
GOBP_POSITIVE_REGULATION_OF_CELL_JUNCTION_ASSEMBLY	http://www.gsea-msigdb.org/gsea/msigdb/human/geneset/GOBP_POSITIVE_REGULATION_OF_CELL_JUNCTION_ASSEMBLY.html	1.5331	0.016298	0.111072
GOBP_CALCIUM_ION_TRANSPORT_INTO_CYTOSOL	http://www.gsea-msigdb.org/gsea/msigdb/human/geneset/GOBP_CALCIUM_ION_TRANSPORT_INTO_CYTOSOL.html	1.53308	0.0156951	0.110645
GOBP_BIOLOGICAL_PROCESS_INVOLVED_IN_INTRASPECIES_INTERACTION_BETWEEN_ORGANISMS	http://www.gsea-msigdb.org/gsea/msigdb/human/geneset/GOBP_BIOLOGICAL_PROCESS_INVOLVED_IN_INTRASPECIES_INTERACTION_BETWEEN_ORGANISMS.html	1.5314	0.0406404	0.111839
GOBP_MEMBRANE_REPOLARIZATION	http://www.gsea-msigdb.org/gsea/msigdb/human/geneset/GOBP_MEMBRANE_REPOLARIZATION.html	1.53021	0.0360248	0.112676
GOBP_RESPONSE_TO_METAL_ION	http://www.gsea-msigdb.org/gsea/msigdb/human/geneset/GOBP_RESPONSE_TO_METAL_ION.html	1.52656	0.00414508	0.116136
GOBP_NEGATIVE_REGULATION_OF_TRANSFERASE_ACTIVITY	http://www.gsea-msigdb.org/gsea/msigdb/human/geneset/GOBP_NEGATIVE_REGULATION_OF_TRANSFERASE_ACTIVITY.html	1.52483	0.00731452	0.117608
GOBP_NUCLEOSIDE_TRIPHOSPHATE_BIOSYNTHETIC_PROCESS	http://www.gsea-msigdb.org/gsea/msigdb/human/geneset/GOBP_NUCLEOSIDE_TRIPHOSPHATE_BIOSYNTHETIC_PROCESS.html	1.5242	0.0239234	0.117945
GOBP_RNA_LOCALIZATION	http://www.gsea-msigdb.org/gsea/msigdb/human/geneset/GOBP_RNA_LOCALIZATION.html	1.52364	0.00838574	0.118099
GOBP_CARDIAC_CONDUCTION	http://www.gsea-msigdb.org/gsea/msigdb/human/geneset/GOBP_CARDIAC_CONDUCTION.html	1.52241	0.013544	0.118928
GOBP_TRANSITION_METAL_ION_TRANSPORT	http://www.gsea-msigdb.org/gsea/msigdb/human/geneset/GOBP_TRANSITION_METAL_ION_TRANSPORT.html	1.52237	0.0185185	0.118507
GOBP_REGULATION_OF_PH	http://www.gsea-msigdb.org/gsea/msigdb/human/geneset/GOBP_REGULATION_OF_PH.html	1.52097	0.0184332	0.11963
GOBP_REGULATION_OF_RELEASE_OF_SEQUESTERED_CALCIUM_ION_INTO_CYTOSOL	http://www.gsea-msigdb.org/gsea/msigdb/human/geneset/GOBP_REGULATION_OF_RELEASE_OF_SEQUESTERED_CALCIUM_ION_INTO_CYTOSOL.html	1.51947	0.0236127	0.120813
GOBP_NUCLEOTIDE_EXCISION_REPAIR_DNA_INCISION	http://www.gsea-msigdb.org/gsea/msigdb/human/geneset/GOBP_NUCLEOTIDE_EXCISION_REPAIR_DNA_INCISION.html	1.51813	0.0315657	0.121907
GOBP_GOLGI_TO_PLASMA_MEMBRANE_PROTEIN_TRANSPORT	http://www.gsea-msigdb.org/gsea/msigdb/human/geneset/GOBP_GOLGI_TO_PLASMA_MEMBRANE_PROTEIN_TRANSPORT.html	1.51781	0.032967	0.121749
GOBP_AMYLOID_PRECURSOR_PROTEIN_METABOLIC_PROCESS	http://www.gsea-msigdb.org/gsea/msigdb/human/geneset/GOBP_AMYLOID_PRECURSOR_PROTEIN_METABOLIC_PROCESS.html	1.51669	0.0225118	0.122629
GOBP_MYELOID_LEUKOCYTE_MEDIATED_IMMUNITY	http://www.gsea-msigdb.org/gsea/msigdb/human/geneset/GOBP_MYELOID_LEUKOCYTE_MEDIATED_IMMUNITY.html	1.51658	0.0020555	0.122314
GOBP_NCRNA_PROCESSING	http://www.gsea-msigdb.org/gsea/msigdb/human/geneset/GOBP_NCRNA_PROCESSING.html	1.51607	0.00625652	0.122415
GOBP_NEGATIVE_REGULATION_OF_PROTEIN_POLYMERIZATION	http://www.gsea-msigdb.org/gsea/msigdb/human/geneset/GOBP_NEGATIVE_REGULATION_OF_PROTEIN_POLYMERIZATION.html	1.51588	0.030445	0.12216
GOBP_REGULATION_OF_POTASSIUM_ION_TRANSPORT	http://www.gsea-msigdb.org/gsea/msigdb/human/geneset/GOBP_REGULATION_OF_POTASSIUM_ION_TRANSPORT.html	1.51523	0.0251716	0.122411
GOBP_REGULATION_OF_INTRINSIC_APOPTOTIC_SIGNALING_PATHWAY	http://www.gsea-msigdb.org/gsea/msigdb/human/geneset/GOBP_REGULATION_OF_INTRINSIC_APOPTOTIC_SIGNALING_PATHWAY.html	1.51397	0.0133482	0.123286
GOBP_CYTOSOLIC_CALCIUM_ION_TRANSPORT	http://www.gsea-msigdb.org/gsea/msigdb/human/geneset/GOBP_CYTOSOLIC_CALCIUM_ION_TRANSPORT.html	1.51306	0.0152505	0.123836
GOBP_POSITIVE_REGULATION_OF_ACTIN_FILAMENT_POLYMERIZATION	http://www.gsea-msigdb.org/gsea/msigdb/human/geneset/GOBP_POSITIVE_REGULATION_OF_ACTIN_FILAMENT_POLYMERIZATION.html	1.51161	0.0261661	0.125003
GOBP_NEGATIVE_REGULATION_OF_PROTEASOMAL_UBIQUITIN_DEPENDENT_PROTEIN_CATABOLIC_PROCESS	http://www.gsea-msigdb.org/gsea/msigdb/human/geneset/GOBP_NEGATIVE_REGULATION_OF_PROTEASOMAL_UBIQUITIN_DEPENDENT_PROTEIN_CATABOLIC_PROCESS.html	1.5101	0.0399501	0.126202
GOBP_REGULATION_OF_MICROTUBULE_POLYMERIZATION_OR_DEPOLYMERIZATION	http://www.gsea-msigdb.org/gsea/msigdb/human/geneset/GOBP_REGULATION_OF_MICROTUBULE_POLYMERIZATION_OR_DEPOLYMERIZATION.html	1.50712	0.0253165	0.129306
GOBP_POSITIVE_REGULATION_OF_PEPTIDASE_ACTIVITY	http://www.gsea-msigdb.org/gsea/msigdb/human/geneset/GOBP_POSITIVE_REGULATION_OF_PEPTIDASE_ACTIVITY.html	1.50648	0.0140845	0.129578
GOBP_MRNA_PROCESSING	http://www.gsea-msigdb.org/gsea/msigdb/human/geneset/GOBP_MRNA_PROCESSING.html	1.50581	0	0.129883
GOBP_POSTSYNAPTIC_SPECIALIZATION_ORGANIZATION	http://www.gsea-msigdb.org/gsea/msigdb/human/geneset/GOBP_POSTSYNAPTIC_SPECIALIZATION_ORGANIZATION.html	1.5058	0.0458599	0.129415
GOBP_REGULATION_OF_POSTSYNAPTIC_MEMBRANE_NEUROTRANSMITTER_RECEPTOR_LEVELS	http://www.gsea-msigdb.org/gsea/msigdb/human/geneset/GOBP_REGULATION_OF_POSTSYNAPTIC_MEMBRANE_NEUROTRANSMITTER_RECEPTOR_LEVELS.html	1.50337	0.0294118	0.131776
GOBP_CELL_PART_MORPHOGENESIS	http://www.gsea-msigdb.org/gsea/msigdb/human/geneset/GOBP_CELL_PART_MORPHOGENESIS.html	1.50311	0	0.131581
GOBP_INORGANIC_ION_IMPORT_ACROSS_PLASMA_MEMBRANE	http://www.gsea-msigdb.org/gsea/msigdb/human/geneset/GOBP_INORGANIC_ION_IMPORT_ACROSS_PLASMA_MEMBRANE.html	1.50232	0.0340776	0.13199
GOBP_REGULATION_OF_CYTOKINESIS	http://www.gsea-msigdb.org/gsea/msigdb/human/geneset/GOBP_REGULATION_OF_CYTOKINESIS.html	1.50206	0.0266667	0.131811
GOBP_ADULT_LOCOMOTORY_BEHAVIOR	http://www.gsea-msigdb.org/gsea/msigdb/human/geneset/GOBP_ADULT_LOCOMOTORY_BEHAVIOR.html	1.5019	0.0368098	0.131561
GOBP_DEVELOPMENTAL_GROWTH_INVOLVED_IN_MORPHOGENESIS	http://www.gsea-msigdb.org/gsea/msigdb/human/geneset/GOBP_DEVELOPMENTAL_GROWTH_INVOLVED_IN_MORPHOGENESIS.html	1.50147	0.00837696	0.131611
GOBP_REGULATION_OF_CYTOSOLIC_CALCIUM_ION_CONCENTRATION	http://www.gsea-msigdb.org/gsea/msigdb/human/geneset/GOBP_REGULATION_OF_CYTOSOLIC_CALCIUM_ION_CONCENTRATION.html	1.50124	0.0119048	0.131399
GOBP_NCRNA_METABOLIC_PROCESS	http://www.gsea-msigdb.org/gsea/msigdb/human/geneset/GOBP_NCRNA_METABOLIC_PROCESS.html	1.49952	0.00309917	0.132895
GOBP_RNA_EXPORT_FROM_NUCLEUS	http://www.gsea-msigdb.org/gsea/msigdb/human/geneset/GOBP_RNA_EXPORT_FROM_NUCLEUS.html	1.49784	0.0163934	0.134522
GOBP_REGULATION_OF_PROTEIN_AUTOPHOSPHORYLATION	http://www.gsea-msigdb.org/gsea/msigdb/human/geneset/GOBP_REGULATION_OF_PROTEIN_AUTOPHOSPHORYLATION.html	1.49733	0.0369898	0.134653
GOBP_POSTTRANSCRIPTIONAL_REGULATION_OF_GENE_EXPRESSION	http://www.gsea-msigdb.org/gsea/msigdb/human/geneset/GOBP_POSTTRANSCRIPTIONAL_REGULATION_OF_GENE_EXPRESSION.html	1.49634	0	0.13531
GOBP_METAL_ION_HOMEOSTASIS	http://www.gsea-msigdb.org/gsea/msigdb/human/geneset/GOBP_METAL_ION_HOMEOSTASIS.html	1.49529	0	0.136127
GOBP_IMPORT_INTO_CELL	http://www.gsea-msigdb.org/gsea/msigdb/human/geneset/GOBP_IMPORT_INTO_CELL.html	1.49445	0.0222469	0.136645
GOBP_REGULATION_OF_ALTERNATIVE_MRNA_SPLICING_VIA_SPLICEOSOME	http://www.gsea-msigdb.org/gsea/msigdb/human/geneset/GOBP_REGULATION_OF_ALTERNATIVE_MRNA_SPLICING_VIA_SPLICEOSOME.html	1.49419	0.0416667	0.136471
GOBP_LOCALIZATION_WITHIN_MEMBRANE	http://www.gsea-msigdb.org/gsea/msigdb/human/geneset/GOBP_LOCALIZATION_WITHIN_MEMBRANE.html	1.49388	0.0294118	0.136364
GOBP_REGULATION_OF_MRNA_SPLICING_VIA_SPLICEOSOME	http://www.gsea-msigdb.org/gsea/msigdb/human/geneset/GOBP_REGULATION_OF_MRNA_SPLICING_VIA_SPLICEOSOME.html	1.49272	0.0144284	0.137241
GOBP_ORGANELLE_FUSION	http://www.gsea-msigdb.org/gsea/msigdb/human/geneset/GOBP_ORGANELLE_FUSION.html	1.49234	0.0196937	0.137273
GOBP_PROTEIN_CONTAINING_COMPLEX_DISASSEMBLY	http://www.gsea-msigdb.org/gsea/msigdb/human/geneset/GOBP_PROTEIN_CONTAINING_COMPLEX_DISASSEMBLY.html	1.4911	0.00625	0.138412
GOBP_CELLULAR_PROTEIN_COMPLEX_DISASSEMBLY	http://www.gsea-msigdb.org/gsea/msigdb/human/geneset/GOBP_CELLULAR_PROTEIN_COMPLEX_DISASSEMBLY.html	1.49	0.0130577	0.139343
GOBP_ORGANELLE_LOCALIZATION	http://www.gsea-msigdb.org/gsea/msigdb/human/geneset/GOBP_ORGANELLE_LOCALIZATION.html	1.48971	0	0.139228
GOBP_RESPONSE_TO_AMYLOID_BETA	http://www.gsea-msigdb.org/gsea/msigdb/human/geneset/GOBP_RESPONSE_TO_AMYLOID_BETA.html	1.48945	0.0380835	0.139099
GOBP_REGULATION_OF_RNA_SPLICING	http://www.gsea-msigdb.org/gsea/msigdb/human/geneset/GOBP_REGULATION_OF_RNA_SPLICING.html	1.48911	0.0140998	0.139008
GOBP_ALTERNATIVE_MRNA_SPLICING_VIA_SPLICEOSOME	http://www.gsea-msigdb.org/gsea/msigdb/human/geneset/GOBP_ALTERNATIVE_MRNA_SPLICING_VIA_SPLICEOSOME.html	1.48714	0.0328054	0.140961
GOBP_ENDOPLASMIC_RETICULUM_TO_GOLGI_VESICLE_MEDIATED_TRANSPORT	http://www.gsea-msigdb.org/gsea/msigdb/human/geneset/GOBP_ENDOPLASMIC_RETICULUM_TO_GOLGI_VESICLE_MEDIATED_TRANSPORT.html	1.48662	0.00961539	0.141143
GOBP_RELEASE_OF_SEQUESTERED_CALCIUM_ION_INTO_CYTOSOL_BY_ENDOPLASMIC_RETICULUM	http://www.gsea-msigdb.org/gsea/msigdb/human/geneset/GOBP_RELEASE_OF_SEQUESTERED_CALCIUM_ION_INTO_CYTOSOL_BY_ENDOPLASMIC_RETICULUM.html	1.48571	0.0435339	0.141732
GOBP_MAINTENANCE_OF_PROTEIN_LOCATION_IN_CELL	http://www.gsea-msigdb.org/gsea/msigdb/human/geneset/GOBP_MAINTENANCE_OF_PROTEIN_LOCATION_IN_CELL.html	1.48331	0.04	0.144336
GOBP_NEGATIVE_REGULATION_OF_CATALYTIC_ACTIVITY	http://www.gsea-msigdb.org/gsea/msigdb/human/geneset/GOBP_NEGATIVE_REGULATION_OF_CATALYTIC_ACTIVITY.html	1.48317	0.00302725	0.144014
GOBP_POSITIVE_REGULATION_OF_SYNAPSE_ASSEMBLY	http://www.gsea-msigdb.org/gsea/msigdb/human/geneset/GOBP_POSITIVE_REGULATION_OF_SYNAPSE_ASSEMBLY.html	1.48199	0.0332937	0.145003
GOBP_ESTABLISHMENT_OF_RNA_LOCALIZATION	http://www.gsea-msigdb.org/gsea/msigdb/human/geneset/GOBP_ESTABLISHMENT_OF_RNA_LOCALIZATION.html	1.48191	0.00741525	0.144628
GOBP_NEURON_APOPTOTIC_PROCESS	http://www.gsea-msigdb.org/gsea/msigdb/human/geneset/GOBP_NEURON_APOPTOTIC_PROCESS.html	1.48174	0.0158898	0.144387
GOBP_INTERSTRAND_CROSS_LINK_REPAIR	http://www.gsea-msigdb.org/gsea/msigdb/human/geneset/GOBP_INTERSTRAND_CROSS_LINK_REPAIR.html	1.48036	0.043202	0.145667
GOBP_NEUROTRANSMITTER_RECEPTOR_TRANSPORT	http://www.gsea-msigdb.org/gsea/msigdb/human/geneset/GOBP_NEUROTRANSMITTER_RECEPTOR_TRANSPORT.html	1.48022	0.0504305	0.145365
GOBP_REGULATION_OF_CELLULAR_COMPONENT_SIZE	http://www.gsea-msigdb.org/gsea/msigdb/human/geneset/GOBP_REGULATION_OF_CELLULAR_COMPONENT_SIZE.html	1.47896	0.0040858	0.14648
GOBP_RIBONUCLEOSIDE_TRIPHOSPHATE_BIOSYNTHETIC_PROCESS	http://www.gsea-msigdb.org/gsea/msigdb/human/geneset/GOBP_RIBONUCLEOSIDE_TRIPHOSPHATE_BIOSYNTHETIC_PROCESS.html	1.47739	0.0343643	0.14801
GOBP_MACROAUTOPHAGY	http://www.gsea-msigdb.org/gsea/msigdb/human/geneset/GOBP_MACROAUTOPHAGY.html	1.47607	0.0061287	0.149337
GOBP_RESPONSE_TO_CATECHOLAMINE	http://www.gsea-msigdb.org/gsea/msigdb/human/geneset/GOBP_RESPONSE_TO_CATECHOLAMINE.html	1.47518	0.0451389	0.149955
GOBP_ENERGY_DERIVATION_BY_OXIDATION_OF_ORGANIC_COMPOUNDS	http://www.gsea-msigdb.org/gsea/msigdb/human/geneset/GOBP_ENERGY_DERIVATION_BY_OXIDATION_OF_ORGANIC_COMPOUNDS.html	1.47495	0.00630252	0.149811
GOBP_DIVALENT_INORGANIC_CATION_HOMEOSTASIS	http://www.gsea-msigdb.org/gsea/msigdb/human/geneset/GOBP_DIVALENT_INORGANIC_CATION_HOMEOSTASIS.html	1.47266	0.00722394	0.152406
GOBP_NEGATIVE_REGULATION_OF_ANION_TRANSPORT	http://www.gsea-msigdb.org/gsea/msigdb/human/geneset/GOBP_NEGATIVE_REGULATION_OF_ANION_TRANSPORT.html	1.47195	0.0241493	0.152883
GOBP_CELLULAR_COMPONENT_MORPHOGENESIS	http://www.gsea-msigdb.org/gsea/msigdb/human/geneset/GOBP_CELLULAR_COMPONENT_MORPHOGENESIS.html	1.47105	0	0.153488
GOBP_NEGATIVE_REGULATION_OF_NEURON_APOPTOTIC_PROCESS	http://www.gsea-msigdb.org/gsea/msigdb/human/geneset/GOBP_NEGATIVE_REGULATION_OF_NEURON_APOPTOTIC_PROCESS.html	1.47032	0.0284738	0.153943
GOBP_NEURON_CELLULAR_HOMEOSTASIS	http://www.gsea-msigdb.org/gsea/msigdb/human/geneset/GOBP_NEURON_CELLULAR_HOMEOSTASIS.html	1.46767	0.0589711	0.156918
GOBP_VESICLE_MEDIATED_TRANSPORT_TO_THE_PLASMA_MEMBRANE	http://www.gsea-msigdb.org/gsea/msigdb/human/geneset/GOBP_VESICLE_MEDIATED_TRANSPORT_TO_THE_PLASMA_MEMBRANE.html	1.4655	0.027933	0.159358
GOBP_CYTOSKELETON_DEPENDENT_INTRACELLULAR_TRANSPORT	http://www.gsea-msigdb.org/gsea/msigdb/human/geneset/GOBP_CYTOSKELETON_DEPENDENT_INTRACELLULAR_TRANSPORT.html	1.46493	0.0188285	0.159686
GOBP_CELL_MORPHOGENESIS_INVOLVED_IN_DIFFERENTIATION	http://www.gsea-msigdb.org/gsea/msigdb/human/geneset/GOBP_CELL_MORPHOGENESIS_INVOLVED_IN_DIFFERENTIATION.html	1.46058	0	0.165253
GOBP_AMYLOID_PRECURSOR_PROTEIN_CATABOLIC_PROCESS	http://www.gsea-msigdb.org/gsea/msigdb/human/geneset/GOBP_AMYLOID_PRECURSOR_PROTEIN_CATABOLIC_PROCESS.html	1.46045	0.035409	0.164915
GOBP_AMYLOID_BETA_METABOLIC_PROCESS	http://www.gsea-msigdb.org/gsea/msigdb/human/geneset/GOBP_AMYLOID_BETA_METABOLIC_PROCESS.html	1.45634	0.0513126	0.170207
GOBP_TRANSLATIONAL_TERMINATION	http://www.gsea-msigdb.org/gsea/msigdb/human/geneset/GOBP_TRANSLATIONAL_TERMINATION.html	1.45528	0.0573664	0.171192
GOBP_REGULATION_OF_CELLULAR_AMIDE_METABOLIC_PROCESS	http://www.gsea-msigdb.org/gsea/msigdb/human/geneset/GOBP_REGULATION_OF_CELLULAR_AMIDE_METABOLIC_PROCESS.html	1.45507	0.00203666	0.170948
GOBP_SECRETION	http://www.gsea-msigdb.org/gsea/msigdb/human/geneset/GOBP_SECRETION.html	1.45482	0	0.170815
GOBP_SARCOPLASMIC_RETICULUM_CALCIUM_ION_TRANSPORT	http://www.gsea-msigdb.org/gsea/msigdb/human/geneset/GOBP_SARCOPLASMIC_RETICULUM_CALCIUM_ION_TRANSPORT.html	1.45475	0.0548628	0.170384
GOBP_CHEMICAL_HOMEOSTASIS	http://www.gsea-msigdb.org/gsea/msigdb/human/geneset/GOBP_CHEMICAL_HOMEOSTASIS.html	1.45463	0	0.170047
GOBP_REGULATION_OF_MONOOXYGENASE_ACTIVITY	http://www.gsea-msigdb.org/gsea/msigdb/human/geneset/GOBP_REGULATION_OF_MONOOXYGENASE_ACTIVITY.html	1.45401	0.0587515	0.170375
GOBP_NEGATIVE_REGULATION_OF_RNA_CATABOLIC_PROCESS	http://www.gsea-msigdb.org/gsea/msigdb/human/geneset/GOBP_NEGATIVE_REGULATION_OF_RNA_CATABOLIC_PROCESS.html	1.45343	0.0511905	0.170629
GOBP_POSITIVE_REGULATION_OF_NEUROGENESIS	http://www.gsea-msigdb.org/gsea/msigdb/human/geneset/GOBP_POSITIVE_REGULATION_OF_NEUROGENESIS.html	1.45308	0.0224359	0.17058
GOBP_CELLULAR_TRANSITION_METAL_ION_HOMEOSTASIS	http://www.gsea-msigdb.org/gsea/msigdb/human/geneset/GOBP_CELLULAR_TRANSITION_METAL_ION_HOMEOSTASIS.html	1.45029	0.0353478	0.173858
GOBP_RAC_PROTEIN_SIGNAL_TRANSDUCTION	http://www.gsea-msigdb.org/gsea/msigdb/human/geneset/GOBP_RAC_PROTEIN_SIGNAL_TRANSDUCTION.html	1.44921	0.0400485	0.174829
GOBP_REGULATION_OF_MITOCHONDRIAL_OUTER_MEMBRANE_PERMEABILIZATION_INVOLVED_IN_APOPTOTIC_SIGNALING_PATHWAY	http://www.gsea-msigdb.org/gsea/msigdb/human/geneset/GOBP_REGULATION_OF_MITOCHONDRIAL_OUTER_MEMBRANE_PERMEABILIZATION_INVOLVED_IN_APOPTOTIC_SIGNALING_PATHWAY.html	1.44831	0.0608365	0.175489
GOBP_POSITIVE_REGULATION_OF_MITOCHONDRIAL_OUTER_MEMBRANE_PERMEABILIZATION_INVOLVED_IN_APOPTOTIC_SIGNALING_PATHWAY	http://www.gsea-msigdb.org/gsea/msigdb/human/geneset/GOBP_POSITIVE_REGULATION_OF_MITOCHONDRIAL_OUTER_MEMBRANE_PERMEABILIZATION_INVOLVED_IN_APOPTOTIC_SIGNALING_PATHWAY.html	1.44793	0.0544304	0.175583
GOBP_POSITIVE_REGULATION_OF_INTRINSIC_APOPTOTIC_SIGNALING_PATHWAY	http://www.gsea-msigdb.org/gsea/msigdb/human/geneset/GOBP_POSITIVE_REGULATION_OF_INTRINSIC_APOPTOTIC_SIGNALING_PATHWAY.html	1.4473	0.0604265	0.175903
GOBP_VIRION_ASSEMBLY	http://www.gsea-msigdb.org/gsea/msigdb/human/geneset/GOBP_VIRION_ASSEMBLY.html	1.44568	0.0636475	0.177631
GOBP_REGULATION_OF_EXTENT_OF_CELL_GROWTH	http://www.gsea-msigdb.org/gsea/msigdb/human/geneset/GOBP_REGULATION_OF_EXTENT_OF_CELL_GROWTH.html	1.44558	0.0400891	0.177249
GOBP_NEGATIVE_REGULATION_OF_AXON_EXTENSION	http://www.gsea-msigdb.org/gsea/msigdb/human/geneset/GOBP_NEGATIVE_REGULATION_OF_AXON_EXTENSION.html	1.4454	0.0475594	0.176989
GOBP_REGULATION_OF_UBIQUITIN_DEPENDENT_PROTEIN_CATABOLIC_PROCESS	http://www.gsea-msigdb.org/gsea/msigdb/human/geneset/GOBP_REGULATION_OF_UBIQUITIN_DEPENDENT_PROTEIN_CATABOLIC_PROCESS.html	1.44512	0.0236052	0.176857
GOBP_CENTRAL_NERVOUS_SYSTEM_NEURON_AXONOGENESIS	http://www.gsea-msigdb.org/gsea/msigdb/human/geneset/GOBP_CENTRAL_NERVOUS_SYSTEM_NEURON_AXONOGENESIS.html	1.44467	0.0512195	0.177061
GOBP_REGULATION_OF_DENDRITE_DEVELOPMENT	http://www.gsea-msigdb.org/gsea/msigdb/human/geneset/GOBP_REGULATION_OF_DENDRITE_DEVELOPMENT.html	1.44391	0.0393701	0.177678
GOBP_REGULATION_OF_SPINDLE_ORGANIZATION	http://www.gsea-msigdb.org/gsea/msigdb/human/geneset/GOBP_REGULATION_OF_SPINDLE_ORGANIZATION.html	1.4418	0.0542636	0.180163
GOBP_MITOCHONDRIAL_TRANSLATION	http://www.gsea-msigdb.org/gsea/msigdb/human/geneset/GOBP_MITOCHONDRIAL_TRANSLATION.html	1.43954	0.0434783	0.183064
GOBP_FC_RECEPTOR_SIGNALING_PATHWAY	http://www.gsea-msigdb.org/gsea/msigdb/human/geneset/GOBP_FC_RECEPTOR_SIGNALING_PATHWAY.html	1.43919	0.0202128	0.183011
GOBP_MITOCHONDRION_ORGANIZATION	http://www.gsea-msigdb.org/gsea/msigdb/human/geneset/GOBP_MITOCHONDRION_ORGANIZATION.html	1.43814	0.00708502	0.183951
GOBP_NUCLEOBASE_CONTAINING_COMPOUND_TRANSPORT	http://www.gsea-msigdb.org/gsea/msigdb/human/geneset/GOBP_NUCLEOBASE_CONTAINING_COMPOUND_TRANSPORT.html	1.43792	0.0105152	0.183762
GOBP_RESPONSE_TO_INORGANIC_SUBSTANCE	http://www.gsea-msigdb.org/gsea/msigdb/human/geneset/GOBP_RESPONSE_TO_INORGANIC_SUBSTANCE.html	1.43656	0.00509165	0.185333
GOBP_NEGATIVE_REGULATION_OF_PROTEIN_CONTAINING_COMPLEX_ASSEMBLY	http://www.gsea-msigdb.org/gsea/msigdb/human/geneset/GOBP_NEGATIVE_REGULATION_OF_PROTEIN_CONTAINING_COMPLEX_ASSEMBLY.html	1.43651	0.0285088	0.184875
GOBP_REGULATION_OF_CALCIUM_ION_TRANSPORT_INTO_CYTOSOL	http://www.gsea-msigdb.org/gsea/msigdb/human/geneset/GOBP_REGULATION_OF_CALCIUM_ION_TRANSPORT_INTO_CYTOSOL.html	1.43357	0.0467066	0.188513
GOBP_NEGATIVE_REGULATION_OF_MOLECULAR_FUNCTION	http://www.gsea-msigdb.org/gsea/msigdb/human/geneset/GOBP_NEGATIVE_REGULATION_OF_MOLECULAR_FUNCTION.html	1.43346	0	0.188166
GOBP_NEGATIVE_REGULATION_OF_CELL_PROJECTION_ORGANIZATION	http://www.gsea-msigdb.org/gsea/msigdb/human/geneset/GOBP_NEGATIVE_REGULATION_OF_CELL_PROJECTION_ORGANIZATION.html	1.43338	0.0281996	0.187752
GOBP_MRNA_EXPORT_FROM_NUCLEUS	http://www.gsea-msigdb.org/gsea/msigdb/human/geneset/GOBP_MRNA_EXPORT_FROM_NUCLEUS.html	1.43307	0.0349887	0.187704
GOBP_POSITIVE_REGULATION_OF_ION_TRANSPORT	http://www.gsea-msigdb.org/gsea/msigdb/human/geneset/GOBP_POSITIVE_REGULATION_OF_ION_TRANSPORT.html	1.43282	0.00606061	0.187529
GOBP_TRANSCRIPTION_COUPLED_NUCLEOTIDE_EXCISION_REPAIR	http://www.gsea-msigdb.org/gsea/msigdb/human/geneset/GOBP_TRANSCRIPTION_COUPLED_NUCLEOTIDE_EXCISION_REPAIR.html	1.43224	0.051497	0.187903
GOBP_POSITIVE_REGULATION_OF_AXON_EXTENSION	http://www.gsea-msigdb.org/gsea/msigdb/human/geneset/GOBP_POSITIVE_REGULATION_OF_AXON_EXTENSION.html	1.43011	0.0704739	0.190682
GOBP_INORGANIC_ANION_TRANSMEMBRANE_TRANSPORT	http://www.gsea-msigdb.org/gsea/msigdb/human/geneset/GOBP_INORGANIC_ANION_TRANSMEMBRANE_TRANSPORT.html	1.42949	0.0589651	0.191079
GOBP_PEROXISOME_ORGANIZATION	http://www.gsea-msigdb.org/gsea/msigdb/human/geneset/GOBP_PEROXISOME_ORGANIZATION.html	1.42866	0.0647059	0.191853
GOBP_REGULATION_OF_CYTOSKELETON_ORGANIZATION	http://www.gsea-msigdb.org/gsea/msigdb/human/geneset/GOBP_REGULATION_OF_CYTOSKELETON_ORGANIZATION.html	1.42785	0.00704935	0.192587
GOBP_POSITIVE_REGULATION_OF_LIPID_TRANSPORT	http://www.gsea-msigdb.org/gsea/msigdb/human/geneset/GOBP_POSITIVE_REGULATION_OF_LIPID_TRANSPORT.html	1.42587	0.0528255	0.195139
GOBP_ENDOPLASMIC_RETICULUM_ORGANIZATION	http://www.gsea-msigdb.org/gsea/msigdb/human/geneset/GOBP_ENDOPLASMIC_RETICULUM_ORGANIZATION.html	1.42483	0.0544379	0.19623
GOBP_IMMUNE_RESPONSE_REGULATING_SIGNALING_PATHWAY	http://www.gsea-msigdb.org/gsea/msigdb/human/geneset/GOBP_IMMUNE_RESPONSE_REGULATING_SIGNALING_PATHWAY.html	1.42383	0.0134995	0.197173
GOBP_SPLICEOSOMAL_COMPLEX_ASSEMBLY	http://www.gsea-msigdb.org/gsea/msigdb/human/geneset/GOBP_SPLICEOSOMAL_COMPLEX_ASSEMBLY.html	1.42336	0.0748218	0.197456
GOBP_REGULATION_OF_TRANSLATIONAL_INITIATION	http://www.gsea-msigdb.org/gsea/msigdb/human/geneset/GOBP_REGULATION_OF_TRANSLATIONAL_INITIATION.html	1.42063	0.0478905	0.201003
GOBP_NEGATIVE_REGULATION_OF_MICROTUBULE_POLYMERIZATION_OR_DEPOLYMERIZATION	http://www.gsea-msigdb.org/gsea/msigdb/human/geneset/GOBP_NEGATIVE_REGULATION_OF_MICROTUBULE_POLYMERIZATION_OR_DEPOLYMERIZATION.html	1.42003	0.0702836	0.201389
GOBP_REGULATION_OF_HEART_CONTRACTION	http://www.gsea-msigdb.org/gsea/msigdb/human/geneset/GOBP_REGULATION_OF_HEART_CONTRACTION.html	1.41932	0.0359086	0.201958
GOBP_CARDIAC_MUSCLE_CELL_CONTRACTION	http://www.gsea-msigdb.org/gsea/msigdb/human/geneset/GOBP_CARDIAC_MUSCLE_CELL_CONTRACTION.html	1.41924	0.0665083	0.201549
GOBP_DETECTION_OF_STIMULUS	http://www.gsea-msigdb.org/gsea/msigdb/human/geneset/GOBP_DETECTION_OF_STIMULUS.html	1.41704	0.0352035	0.204337
GOBP_NEGATIVE_REGULATION_OF_PROTEIN_BINDING	http://www.gsea-msigdb.org/gsea/msigdb/human/geneset/GOBP_NEGATIVE_REGULATION_OF_PROTEIN_BINDING.html	1.41599	0.0596659	0.205518
GOBP_RESPONSE_TO_PEPTIDE	http://www.gsea-msigdb.org/gsea/msigdb/human/geneset/GOBP_RESPONSE_TO_PEPTIDE.html	1.41502	0.00506073	0.206505
GOBP_AXO_DENDRITIC_TRANSPORT	http://www.gsea-msigdb.org/gsea/msigdb/human/geneset/GOBP_AXO_DENDRITIC_TRANSPORT.html	1.41454	0.0484234	0.206698
GOBP_ORGANOPHOSPHATE_CATABOLIC_PROCESS	http://www.gsea-msigdb.org/gsea/msigdb/human/geneset/GOBP_ORGANOPHOSPHATE_CATABOLIC_PROCESS.html	1.41392	0.0482759	0.2072
GOBP_MODIFICATION_DEPENDENT_MACROMOLECULE_CATABOLIC_PROCESS	http://www.gsea-msigdb.org/gsea/msigdb/human/geneset/GOBP_MODIFICATION_DEPENDENT_MACROMOLECULE_CATABOLIC_PROCESS.html	1.41382	0	0.206825
GOBP_REGULATION_OF_ACTIN_FILAMENT_BASED_PROCESS	http://www.gsea-msigdb.org/gsea/msigdb/human/geneset/GOBP_REGULATION_OF_ACTIN_FILAMENT_BASED_PROCESS.html	1.41365	0.0122699	0.206556
GOBP_POSITIVE_REGULATION_OF_DENDRITE_MORPHOGENESIS	http://www.gsea-msigdb.org/gsea/msigdb/human/geneset/GOBP_POSITIVE_REGULATION_OF_DENDRITE_MORPHOGENESIS.html	1.41325	0.0659341	0.206628
GOBP_NEGATIVE_REGULATION_OF_BINDING	http://www.gsea-msigdb.org/gsea/msigdb/human/geneset/GOBP_NEGATIVE_REGULATION_OF_BINDING.html	1.41115	0.0465116	0.209427
GOBP_INTERLEUKIN_1_MEDIATED_SIGNALING_PATHWAY	http://www.gsea-msigdb.org/gsea/msigdb/human/geneset/GOBP_INTERLEUKIN_1_MEDIATED_SIGNALING_PATHWAY.html	1.4108	0.057243	0.209459
GOBP_RNA_DEPENDENT_DNA_BIOSYNTHETIC_PROCESS	http://www.gsea-msigdb.org/gsea/msigdb/human/geneset/GOBP_RNA_DEPENDENT_DNA_BIOSYNTHETIC_PROCESS.html	1.40999	0.0477897	0.210167
GOBP_AXON_DEVELOPMENT	http://www.gsea-msigdb.org/gsea/msigdb/human/geneset/GOBP_AXON_DEVELOPMENT.html	1.40917	0.0060423	0.210991
GOBP_VESICLE_TARGETING	http://www.gsea-msigdb.org/gsea/msigdb/human/geneset/GOBP_VESICLE_TARGETING.html	1.4087	0.0456621	0.211247
GOBP_REGULATION_OF_PEPTIDASE_ACTIVITY	http://www.gsea-msigdb.org/gsea/msigdb/human/geneset/GOBP_REGULATION_OF_PEPTIDASE_ACTIVITY.html	1.40862	0.015544	0.210823
GOBP_POSITIVE_REGULATION_OF_NF_KAPPAB_TRANSCRIPTION_FACTOR_ACTIVITY	http://www.gsea-msigdb.org/gsea/msigdb/human/geneset/GOBP_POSITIVE_REGULATION_OF_NF_KAPPAB_TRANSCRIPTION_FACTOR_ACTIVITY.html	1.40671	0.0432372	0.213366
GOBP_TELOMERE_MAINTENANCE_VIA_TELOMERE_LENGTHENING	http://www.gsea-msigdb.org/gsea/msigdb/human/geneset/GOBP_TELOMERE_MAINTENANCE_VIA_TELOMERE_LENGTHENING.html	1.40603	0.0675204	0.213802
GOBP_ACTIN_FILAMENT_ORGANIZATION	http://www.gsea-msigdb.org/gsea/msigdb/human/geneset/GOBP_ACTIN_FILAMENT_ORGANIZATION.html	1.40602	0.0111902	0.213272
GOBP_PROTEIN_LOCALIZATION_TO_CHROMOSOME_TELOMERIC_REGION	http://www.gsea-msigdb.org/gsea/msigdb/human/geneset/GOBP_PROTEIN_LOCALIZATION_TO_CHROMOSOME_TELOMERIC_REGION.html	1.40561	0.0813954	0.213413
GOBP_REGULATION_OF_AUTOPHAGY_OF_MITOCHONDRION	http://www.gsea-msigdb.org/gsea/msigdb/human/geneset/GOBP_REGULATION_OF_AUTOPHAGY_OF_MITOCHONDRION.html	1.40526	0.0811153	0.21337
GOBP_NEGATIVE_REGULATION_OF_KINASE_ACTIVITY	http://www.gsea-msigdb.org/gsea/msigdb/human/geneset/GOBP_NEGATIVE_REGULATION_OF_KINASE_ACTIVITY.html	1.40447	0.0189873	0.214145
GOBP_G_PROTEIN_COUPLED_RECEPTOR_SIGNALING_PATHWAY	http://www.gsea-msigdb.org/gsea/msigdb/human/geneset/GOBP_G_PROTEIN_COUPLED_RECEPTOR_SIGNALING_PATHWAY.html	1.40156	0.00915565	0.2185
GOBP_PROTEIN_KINASE_A_SIGNALING	http://www.gsea-msigdb.org/gsea/msigdb/human/geneset/GOBP_PROTEIN_KINASE_A_SIGNALING.html	1.40121	0.0766283	0.218554
GOBP_CYTOSOLIC_TRANSPORT	http://www.gsea-msigdb.org/gsea/msigdb/human/geneset/GOBP_CYTOSOLIC_TRANSPORT.html	1.40039	0.0385439	0.219481
GOBP_REGULATION_OF_MITOCHONDRIAL_MEMBRANE_PERMEABILITY	http://www.gsea-msigdb.org/gsea/msigdb/human/geneset/GOBP_REGULATION_OF_MITOCHONDRIAL_MEMBRANE_PERMEABILITY.html	1.40032	0.0694118	0.219016
GOBP_NEURON_PROJECTION_GUIDANCE	http://www.gsea-msigdb.org/gsea/msigdb/human/geneset/GOBP_NEURON_PROJECTION_GUIDANCE.html	1.39838	0.022869	0.221627
GOBP_CELLULAR_RESPONSE_TO_PEPTIDE	http://www.gsea-msigdb.org/gsea/msigdb/human/geneset/GOBP_CELLULAR_RESPONSE_TO_PEPTIDE.html	1.39834	0.0163265	0.221112
GOBP_MAINTENANCE_OF_BLOOD_BRAIN_BARRIER	http://www.gsea-msigdb.org/gsea/msigdb/human/geneset/GOBP_MAINTENANCE_OF_BLOOD_BRAIN_BARRIER.html	1.39787	0.0854592	0.221383
GOBP_NEGATIVE_REGULATION_OF_HYDROLASE_ACTIVITY	http://www.gsea-msigdb.org/gsea/msigdb/human/geneset/GOBP_NEGATIVE_REGULATION_OF_HYDROLASE_ACTIVITY.html	1.39777	0.0176532	0.221004
GOBP_CELLULAR_RESPONSE_TO_AMYLOID_BETA	http://www.gsea-msigdb.org/gsea/msigdb/human/geneset/GOBP_CELLULAR_RESPONSE_TO_AMYLOID_BETA.html	1.3965	0.085	0.222413
GOBP_TELOMERE_ORGANIZATION	http://www.gsea-msigdb.org/gsea/msigdb/human/geneset/GOBP_TELOMERE_ORGANIZATION.html	1.3949	0.0543237	0.224525
GOBP_ARP2_3_COMPLEX_MEDIATED_ACTIN_NUCLEATION	http://www.gsea-msigdb.org/gsea/msigdb/human/geneset/GOBP_ARP2_3_COMPLEX_MEDIATED_ACTIN_NUCLEATION.html	1.39478	0.0833333	0.224165
GOBP_LIMBIC_SYSTEM_DEVELOPMENT	http://www.gsea-msigdb.org/gsea/msigdb/human/geneset/GOBP_LIMBIC_SYSTEM_DEVELOPMENT.html	1.39425	0.0668258	0.224488
GOBP_PHOSPHOLIPID_CATABOLIC_PROCESS	http://www.gsea-msigdb.org/gsea/msigdb/human/geneset/GOBP_PHOSPHOLIPID_CATABOLIC_PROCESS.html	1.39382	0.089172	0.224623
GOBP_NEGATIVE_REGULATION_OF_PROTEASOMAL_PROTEIN_CATABOLIC_PROCESS	http://www.gsea-msigdb.org/gsea/msigdb/human/geneset/GOBP_NEGATIVE_REGULATION_OF_PROTEASOMAL_PROTEIN_CATABOLIC_PROCESS.html	1.39358	0.0790754	0.224515
GOBP_REGULATION_OF_BLOOD_CIRCULATION	http://www.gsea-msigdb.org/gsea/msigdb/human/geneset/GOBP_REGULATION_OF_BLOOD_CIRCULATION.html	1.3934	0.0364807	0.224295
GOBP_ACTIN_FILAMENT_DEPOLYMERIZATION	http://www.gsea-msigdb.org/gsea/msigdb/human/geneset/GOBP_ACTIN_FILAMENT_DEPOLYMERIZATION.html	1.39286	0.070197	0.224696
GOBP_UBIQUITIN_DEPENDENT_ERAD_PATHWAY	http://www.gsea-msigdb.org/gsea/msigdb/human/geneset/GOBP_UBIQUITIN_DEPENDENT_ERAD_PATHWAY.html	1.39229	0.0684932	0.225135
GOBP_AXON_EXTENSION	http://www.gsea-msigdb.org/gsea/msigdb/human/geneset/GOBP_AXON_EXTENSION.html	1.39211	0.0434783	0.224855
GOBP_CELLULAR_PROTEIN_CATABOLIC_PROCESS	http://www.gsea-msigdb.org/gsea/msigdb/human/geneset/GOBP_CELLULAR_PROTEIN_CATABOLIC_PROCESS.html	1.39203	0.00200401	0.224423
GOBP_POSITIVE_REGULATION_OF_TRANSLATION	http://www.gsea-msigdb.org/gsea/msigdb/human/geneset/GOBP_POSITIVE_REGULATION_OF_TRANSLATION.html	1.39148	0.0584344	0.224893
GOBP_LONG_TERM_MEMORY	http://www.gsea-msigdb.org/gsea/msigdb/human/geneset/GOBP_LONG_TERM_MEMORY.html	1.39125	0.100254	0.224708
GOBP_GOLGI_VESICLE_TRANSPORT	http://www.gsea-msigdb.org/gsea/msigdb/human/geneset/GOBP_GOLGI_VESICLE_TRANSPORT.html	1.38937	0.0132248	0.227477
GOBP_PEROXISOMAL_TRANSPORT	http://www.gsea-msigdb.org/gsea/msigdb/human/geneset/GOBP_PEROXISOMAL_TRANSPORT.html	1.38903	0.0722022	0.227444
GOBP_PROTEIN_LOCALIZATION_TO_CHROMOSOME	http://www.gsea-msigdb.org/gsea/msigdb/human/geneset/GOBP_PROTEIN_LOCALIZATION_TO_CHROMOSOME.html	1.38816	0.068525	0.228399
GOBP_POSTREPLICATION_REPAIR	http://www.gsea-msigdb.org/gsea/msigdb/human/geneset/GOBP_POSTREPLICATION_REPAIR.html	1.38778	0.0752688	0.228508
GOBP_CELLULAR_RESPONSE_TO_CARBOHYDRATE_STIMULUS	http://www.gsea-msigdb.org/gsea/msigdb/human/geneset/GOBP_CELLULAR_RESPONSE_TO_CARBOHYDRATE_STIMULUS.html	1.38738	0.0619369	0.228651
GOBP_ESTABLISHMENT_OF_ORGANELLE_LOCALIZATION	http://www.gsea-msigdb.org/gsea/msigdb/human/geneset/GOBP_ESTABLISHMENT_OF_ORGANELLE_LOCALIZATION.html	1.38717	0.0111902	0.22846
GOBP_HIPPOCAMPUS_DEVELOPMENT	http://www.gsea-msigdb.org/gsea/msigdb/human/geneset/GOBP_HIPPOCAMPUS_DEVELOPMENT.html	1.38683	0.0728155	0.228462
GOBP_NEGATIVE_REGULATION_OF_VIRAL_PROCESS	http://www.gsea-msigdb.org/gsea/msigdb/human/geneset/GOBP_NEGATIVE_REGULATION_OF_VIRAL_PROCESS.html	1.38625	0.0913642	0.228922
GOBP_REGULATION_OF_MUSCLE_CONTRACTION	http://www.gsea-msigdb.org/gsea/msigdb/human/geneset/GOBP_REGULATION_OF_MUSCLE_CONTRACTION.html	1.3857	0.0655367	0.229332
GOBP_INTRINSIC_APOPTOTIC_SIGNALING_PATHWAY	http://www.gsea-msigdb.org/gsea/msigdb/human/geneset/GOBP_INTRINSIC_APOPTOTIC_SIGNALING_PATHWAY.html	1.38558	0.0262881	0.228992
GOBP_VACUOLAR_TRANSPORT	http://www.gsea-msigdb.org/gsea/msigdb/human/geneset/GOBP_VACUOLAR_TRANSPORT.html	1.38503	0.0365985	0.229405
GOBP_GLYCEROLIPID_CATABOLIC_PROCESS	http://www.gsea-msigdb.org/gsea/msigdb/human/geneset/GOBP_GLYCEROLIPID_CATABOLIC_PROCESS.html	1.38486	0.0916977	0.229169
GOBP_POSITIVE_REGULATION_OF_CYSTEINE_TYPE_ENDOPEPTIDASE_ACTIVITY	http://www.gsea-msigdb.org/gsea/msigdb/human/geneset/GOBP_POSITIVE_REGULATION_OF_CYSTEINE_TYPE_ENDOPEPTIDASE_ACTIVITY.html	1.38427	0.0731429	0.229652
GOBP_NEURON_DEVELOPMENT	http://www.gsea-msigdb.org/gsea/msigdb/human/geneset/GOBP_NEURON_DEVELOPMENT.html	1.38408	0.001001	0.229414
GOBP_REGULATION_OF_NEURON_PROJECTION_DEVELOPMENT	http://www.gsea-msigdb.org/gsea/msigdb/human/geneset/GOBP_REGULATION_OF_NEURON_PROJECTION_DEVELOPMENT.html	1.38354	0.0121704	0.229858
GOBP_REGULATION_OF_PROTEIN_CONTAINING_COMPLEX_ASSEMBLY	http://www.gsea-msigdb.org/gsea/msigdb/human/geneset/GOBP_REGULATION_OF_PROTEIN_CONTAINING_COMPLEX_ASSEMBLY.html	1.38319	0.0101729	0.229891
GOBP_HETEROPHILIC_CELL_CELL_ADHESION_VIA_PLASMA_MEMBRANE_CELL_ADHESION_MOLECULES	http://www.gsea-msigdb.org/gsea/msigdb/human/geneset/GOBP_HETEROPHILIC_CELL_CELL_ADHESION_VIA_PLASMA_MEMBRANE_CELL_ADHESION_MOLECULES.html	1.38262	0.0970626	0.230379
GOBP_CELL_JUNCTION_ASSEMBLY	http://www.gsea-msigdb.org/gsea/msigdb/human/geneset/GOBP_CELL_JUNCTION_ASSEMBLY.html	1.38152	0.0163099	0.231803
GOBP_MITOTIC_SPINDLE_ORGANIZATION	http://www.gsea-msigdb.org/gsea/msigdb/human/geneset/GOBP_MITOTIC_SPINDLE_ORGANIZATION.html	1.3814	0.0457143	0.231477
GOBP_MICROTUBULE_POLYMERIZATION_OR_DEPOLYMERIZATION	http://www.gsea-msigdb.org/gsea/msigdb/human/geneset/GOBP_MICROTUBULE_POLYMERIZATION_OR_DEPOLYMERIZATION.html	1.38058	0.057971	0.232351
GOBP_MYELOID_LEUKOCYTE_ACTIVATION	http://www.gsea-msigdb.org/gsea/msigdb/human/geneset/GOBP_MYELOID_LEUKOCYTE_ACTIVATION.html	1.37944	0.00507614	0.233841
GOBP_INSULIN_SECRETION_INVOLVED_IN_CELLULAR_RESPONSE_TO_GLUCOSE_STIMULUS	http://www.gsea-msigdb.org/gsea/msigdb/human/geneset/GOBP_INSULIN_SECRETION_INVOLVED_IN_CELLULAR_RESPONSE_TO_GLUCOSE_STIMULUS.html	1.37922	0.0913642	0.233626
GOBP_DEVELOPMENTAL_MATURATION	http://www.gsea-msigdb.org/gsea/msigdb/human/geneset/GOBP_DEVELOPMENTAL_MATURATION.html	1.37855	0.0432432	0.234241
GOBP_POSITIVE_REGULATION_OF_MITOCHONDRION_ORGANIZATION	http://www.gsea-msigdb.org/gsea/msigdb/human/geneset/GOBP_POSITIVE_REGULATION_OF_MITOCHONDRION_ORGANIZATION.html	1.37839	0.0780712	0.234056
GOBP_VESICLE_ORGANIZATION	http://www.gsea-msigdb.org/gsea/msigdb/human/geneset/GOBP_VESICLE_ORGANIZATION.html	1.37798	0.0217166	0.234244
GOBP_CHLORIDE_TRANSPORT	http://www.gsea-msigdb.org/gsea/msigdb/human/geneset/GOBP_CHLORIDE_TRANSPORT.html	1.37733	0.0809816	0.234842
GOBP_REGULATION_OF_NEUROGENESIS	http://www.gsea-msigdb.org/gsea/msigdb/human/geneset/GOBP_REGULATION_OF_NEUROGENESIS.html	1.3738	0.0297436	0.240376
GOBP_POSITIVE_REGULATION_OF_TELOMERE_MAINTENANCE	http://www.gsea-msigdb.org/gsea/msigdb/human/geneset/GOBP_POSITIVE_REGULATION_OF_TELOMERE_MAINTENANCE.html	1.37375	0.0876351	0.239941
GOBP_REGULATION_OF_NERVOUS_SYSTEM_DEVELOPMENT	http://www.gsea-msigdb.org/gsea/msigdb/human/geneset/GOBP_REGULATION_OF_NERVOUS_SYSTEM_DEVELOPMENT.html	1.37038	0.017418	0.245399
GOBP_REGULATION_OF_MEMBRANE_PERMEABILITY	http://www.gsea-msigdb.org/gsea/msigdb/human/geneset/GOBP_REGULATION_OF_MEMBRANE_PERMEABILITY.html	1.37036	0.0890173	0.244873
GOBP_NEGATIVE_REGULATION_OF_DEPHOSPHORYLATION	http://www.gsea-msigdb.org/gsea/msigdb/human/geneset/GOBP_NEGATIVE_REGULATION_OF_DEPHOSPHORYLATION.html	1.36938	0.0600462	0.246001
GOBP_GENERATION_OF_PRECURSOR_METABOLITES_AND_ENERGY	http://www.gsea-msigdb.org/gsea/msigdb/human/geneset/GOBP_GENERATION_OF_PRECURSOR_METABOLITES_AND_ENERGY.html	1.36906	0.0203874	0.246025
GOBP_MITOCHONDRIAL_TRANSLATIONAL_TERMINATION	http://www.gsea-msigdb.org/gsea/msigdb/human/geneset/GOBP_MITOCHONDRIAL_TRANSLATIONAL_TERMINATION.html	1.36886	0.0985916	0.245847
GOBP_SINGLE_FERTILIZATION	http://www.gsea-msigdb.org/gsea/msigdb/human/geneset/GOBP_SINGLE_FERTILIZATION.html	1.36634	0.0734597	0.249902

## Sheet: CytoTrace_ADpositive_pathways
NAME	URL	NES	NOM p-val	FDR q-val
GOBP_COTRANSLATIONAL_PROTEIN_TARGETING_TO_MEMBRANE	http://www.gsea-msigdb.org/gsea/msigdb/human/geneset/GOBP_COTRANSLATIONAL_PROTEIN_TARGETING_TO_MEMBRANE.html	3.16001	0	0
GOBP_ESTABLISHMENT_OF_PROTEIN_LOCALIZATION_TO_ENDOPLASMIC_RETICULUM	http://www.gsea-msigdb.org/gsea/msigdb/human/geneset/GOBP_ESTABLISHMENT_OF_PROTEIN_LOCALIZATION_TO_ENDOPLASMIC_RETICULUM.html	3.10627	0	0
GOBP_NUCLEAR_TRANSCRIBED_MRNA_CATABOLIC_PROCESS_NONSENSE_MEDIATED_DECAY	http://www.gsea-msigdb.org/gsea/msigdb/human/geneset/GOBP_NUCLEAR_TRANSCRIBED_MRNA_CATABOLIC_PROCESS_NONSENSE_MEDIATED_DECAY.html	3.01783	0	0
GOBP_PROTEIN_LOCALIZATION_TO_ENDOPLASMIC_RETICULUM	http://www.gsea-msigdb.org/gsea/msigdb/human/geneset/GOBP_PROTEIN_LOCALIZATION_TO_ENDOPLASMIC_RETICULUM.html	3.01595	0	0
GOBP_PROTEIN_TARGETING_TO_MEMBRANE	http://www.gsea-msigdb.org/gsea/msigdb/human/geneset/GOBP_PROTEIN_TARGETING_TO_MEMBRANE.html	2.85525	0	0
GOBP_ESTABLISHMENT_OF_PROTEIN_LOCALIZATION_TO_MEMBRANE	http://www.gsea-msigdb.org/gsea/msigdb/human/geneset/GOBP_ESTABLISHMENT_OF_PROTEIN_LOCALIZATION_TO_MEMBRANE.html	2.76299	0	0
GOBP_VIRAL_GENE_EXPRESSION	http://www.gsea-msigdb.org/gsea/msigdb/human/geneset/GOBP_VIRAL_GENE_EXPRESSION.html	2.75359	0	0
GOBP_TRANSLATIONAL_INITIATION	http://www.gsea-msigdb.org/gsea/msigdb/human/geneset/GOBP_TRANSLATIONAL_INITIATION.html	2.74156	0	0
GOBP_NUCLEAR_TRANSCRIBED_MRNA_CATABOLIC_PROCESS	http://www.gsea-msigdb.org/gsea/msigdb/human/geneset/GOBP_NUCLEAR_TRANSCRIBED_MRNA_CATABOLIC_PROCESS.html	2.62785	0	0
GOBP_REGULATION_OF_NEUROTRANSMITTER_RECEPTOR_ACTIVITY	http://www.gsea-msigdb.org/gsea/msigdb/human/geneset/GOBP_REGULATION_OF_NEUROTRANSMITTER_RECEPTOR_ACTIVITY.html	2.47592	0	0
GOBP_REGULATION_OF_NMDA_RECEPTOR_ACTIVITY	http://www.gsea-msigdb.org/gsea/msigdb/human/geneset/GOBP_REGULATION_OF_NMDA_RECEPTOR_ACTIVITY.html	2.43828	0	0
GOBP_CYTOPLASMIC_TRANSLATION	http://www.gsea-msigdb.org/gsea/msigdb/human/geneset/GOBP_CYTOPLASMIC_TRANSLATION.html	2.3973	0	0
GOBP_NEUROTRANSMITTER_SECRETION	http://www.gsea-msigdb.org/gsea/msigdb/human/geneset/GOBP_NEUROTRANSMITTER_SECRETION.html	2.37525	0	0
GOBP_REGULATION_OF_CATION_CHANNEL_ACTIVITY	http://www.gsea-msigdb.org/gsea/msigdb/human/geneset/GOBP_REGULATION_OF_CATION_CHANNEL_ACTIVITY.html	2.35193	0	0
GOBP_GLUTAMATE_RECEPTOR_SIGNALING_PATHWAY	http://www.gsea-msigdb.org/gsea/msigdb/human/geneset/GOBP_GLUTAMATE_RECEPTOR_SIGNALING_PATHWAY.html	2.33941	0	0
GOBP_CHEMICAL_SYNAPTIC_TRANSMISSION_POSTSYNAPTIC	http://www.gsea-msigdb.org/gsea/msigdb/human/geneset/GOBP_CHEMICAL_SYNAPTIC_TRANSMISSION_POSTSYNAPTIC.html	2.3288	0	0
GOBP_IONOTROPIC_GLUTAMATE_RECEPTOR_SIGNALING_PATHWAY	http://www.gsea-msigdb.org/gsea/msigdb/human/geneset/GOBP_IONOTROPIC_GLUTAMATE_RECEPTOR_SIGNALING_PATHWAY.html	2.31185	0	0
GOBP_PROTEIN_TARGETING	http://www.gsea-msigdb.org/gsea/msigdb/human/geneset/GOBP_PROTEIN_TARGETING.html	2.30866	0	0
GOBP_REGULATION_OF_TRANS_SYNAPTIC_SIGNALING	http://www.gsea-msigdb.org/gsea/msigdb/human/geneset/GOBP_REGULATION_OF_TRANS_SYNAPTIC_SIGNALING.html	2.30534	0	0
GOBP_REGULATION_OF_POSTSYNAPTIC_MEMBRANE_POTENTIAL	http://www.gsea-msigdb.org/gsea/msigdb/human/geneset/GOBP_REGULATION_OF_POSTSYNAPTIC_MEMBRANE_POTENTIAL.html	2.29888	0	0
GOBP_OXIDATIVE_PHOSPHORYLATION	http://www.gsea-msigdb.org/gsea/msigdb/human/geneset/GOBP_OXIDATIVE_PHOSPHORYLATION.html	2.27439	0	0
GOBP_RIBOSOMAL_LARGE_SUBUNIT_BIOGENESIS	http://www.gsea-msigdb.org/gsea/msigdb/human/geneset/GOBP_RIBOSOMAL_LARGE_SUBUNIT_BIOGENESIS.html	2.26896	0	0
GOBP_SYNAPTIC_VESICLE_EXOCYTOSIS	http://www.gsea-msigdb.org/gsea/msigdb/human/geneset/GOBP_SYNAPTIC_VESICLE_EXOCYTOSIS.html	2.2668	0	0
GOBP_PROTEIN_LOCALIZATION_TO_MEMBRANE	http://www.gsea-msigdb.org/gsea/msigdb/human/geneset/GOBP_PROTEIN_LOCALIZATION_TO_MEMBRANE.html	2.26477	0	0
GOBP_REGULATION_OF_NEUROTRANSMITTER_TRANSPORT	http://www.gsea-msigdb.org/gsea/msigdb/human/geneset/GOBP_REGULATION_OF_NEUROTRANSMITTER_TRANSPORT.html	2.25873	0	0
GOBP_PRESYNAPSE_ORGANIZATION	http://www.gsea-msigdb.org/gsea/msigdb/human/geneset/GOBP_PRESYNAPSE_ORGANIZATION.html	2.24071	0	0
GOBP_ATP_SYNTHESIS_COUPLED_ELECTRON_TRANSPORT	http://www.gsea-msigdb.org/gsea/msigdb/human/geneset/GOBP_ATP_SYNTHESIS_COUPLED_ELECTRON_TRANSPORT.html	2.23787	0	0
GOBP_SYNAPTIC_SIGNALING	http://www.gsea-msigdb.org/gsea/msigdb/human/geneset/GOBP_SYNAPTIC_SIGNALING.html	2.23047	0	0
GOBP_REGULATION_OF_SYNAPTIC_PLASTICITY	http://www.gsea-msigdb.org/gsea/msigdb/human/geneset/GOBP_REGULATION_OF_SYNAPTIC_PLASTICITY.html	2.21585	0	0
GOBP_REGULATION_OF_CATION_TRANSMEMBRANE_TRANSPORT	http://www.gsea-msigdb.org/gsea/msigdb/human/geneset/GOBP_REGULATION_OF_CATION_TRANSMEMBRANE_TRANSPORT.html	2.21399	0	2.87113e-05
GOBP_REGULATION_OF_NEUROTRANSMITTER_LEVELS	http://www.gsea-msigdb.org/gsea/msigdb/human/geneset/GOBP_REGULATION_OF_NEUROTRANSMITTER_LEVELS.html	2.21281	0	2.77852e-05
GOBP_ACTION_POTENTIAL	http://www.gsea-msigdb.org/gsea/msigdb/human/geneset/GOBP_ACTION_POTENTIAL.html	2.21159	0	2.69169e-05
GOBP_NEUROTRANSMITTER_TRANSPORT	http://www.gsea-msigdb.org/gsea/msigdb/human/geneset/GOBP_NEUROTRANSMITTER_TRANSPORT.html	2.20519	0	5.2122e-05
GOBP_REGULATION_OF_MEMBRANE_POTENTIAL	http://www.gsea-msigdb.org/gsea/msigdb/human/geneset/GOBP_REGULATION_OF_MEMBRANE_POTENTIAL.html	2.20434	0	5.0589e-05
GOBP_REGULATION_OF_TRANSPORTER_ACTIVITY	http://www.gsea-msigdb.org/gsea/msigdb/human/geneset/GOBP_REGULATION_OF_TRANSPORTER_ACTIVITY.html	2.19036	0	4.91436e-05
GOBP_REGULATION_OF_SYNAPTIC_VESICLE_EXOCYTOSIS	http://www.gsea-msigdb.org/gsea/msigdb/human/geneset/GOBP_REGULATION_OF_SYNAPTIC_VESICLE_EXOCYTOSIS.html	2.17326	0	7.17169e-05
GOBP_PROTON_TRANSMEMBRANE_TRANSPORT	http://www.gsea-msigdb.org/gsea/msigdb/human/geneset/GOBP_PROTON_TRANSMEMBRANE_TRANSPORT.html	2.15346	0	9.31182e-05
GOBP_VESICLE_MEDIATED_TRANSPORT_IN_SYNAPSE	http://www.gsea-msigdb.org/gsea/msigdb/human/geneset/GOBP_VESICLE_MEDIATED_TRANSPORT_IN_SYNAPSE.html	2.15178	0	9.06678e-05
GOBP_REGULATION_OF_EXOCYTOSIS	http://www.gsea-msigdb.org/gsea/msigdb/human/geneset/GOBP_REGULATION_OF_EXOCYTOSIS.html	2.14309	0	0.000132801
GOBP_RIBOSOMAL_SMALL_SUBUNIT_BIOGENESIS	http://www.gsea-msigdb.org/gsea/msigdb/human/geneset/GOBP_RIBOSOMAL_SMALL_SUBUNIT_BIOGENESIS.html	2.12818	0	0.000151148
GOBP_REGULATION_OF_REGULATED_SECRETORY_PATHWAY	http://www.gsea-msigdb.org/gsea/msigdb/human/geneset/GOBP_REGULATION_OF_REGULATED_SECRETORY_PATHWAY.html	2.10928	0	0.000273584
GOBP_CATION_TRANSMEMBRANE_TRANSPORT	http://www.gsea-msigdb.org/gsea/msigdb/human/geneset/GOBP_CATION_TRANSMEMBRANE_TRANSPORT.html	2.10286	0	0.000329186
GOBP_RIBOSOME_ASSEMBLY	http://www.gsea-msigdb.org/gsea/msigdb/human/geneset/GOBP_RIBOSOME_ASSEMBLY.html	2.08738	0	0.000361347
GOBP_REGULATION_OF_TRANSMEMBRANE_TRANSPORT	http://www.gsea-msigdb.org/gsea/msigdb/human/geneset/GOBP_REGULATION_OF_TRANSMEMBRANE_TRANSPORT.html	2.08048	0	0.000392561
GOBP_PEPTIDE_BIOSYNTHETIC_PROCESS	http://www.gsea-msigdb.org/gsea/msigdb/human/geneset/GOBP_PEPTIDE_BIOSYNTHETIC_PROCESS.html	2.07945	0	0.000383838
GOBP_MEMBRANE_DEPOLARIZATION	http://www.gsea-msigdb.org/gsea/msigdb/human/geneset/GOBP_MEMBRANE_DEPOLARIZATION.html	2.07641	0	0.000375493
GOBP_CARDIAC_MUSCLE_CELL_ACTION_POTENTIAL	http://www.gsea-msigdb.org/gsea/msigdb/human/geneset/GOBP_CARDIAC_MUSCLE_CELL_ACTION_POTENTIAL.html	2.07363	0	0.000367504
GOBP_RNA_CATABOLIC_PROCESS	http://www.gsea-msigdb.org/gsea/msigdb/human/geneset/GOBP_RNA_CATABOLIC_PROCESS.html	2.06875	0	0.000359848
GOBP_RESPIRATORY_ELECTRON_TRANSPORT_CHAIN	http://www.gsea-msigdb.org/gsea/msigdb/human/geneset/GOBP_RESPIRATORY_ELECTRON_TRANSPORT_CHAIN.html	2.04964	0	0.000545853
GOBP_REGULATION_OF_SIGNALING_RECEPTOR_ACTIVITY	http://www.gsea-msigdb.org/gsea/msigdb/human/geneset/GOBP_REGULATION_OF_SIGNALING_RECEPTOR_ACTIVITY.html	2.03103	0	0.0007758
GOBP_ESTABLISHMENT_OF_PROTEIN_LOCALIZATION_TO_ORGANELLE	http://www.gsea-msigdb.org/gsea/msigdb/human/geneset/GOBP_ESTABLISHMENT_OF_PROTEIN_LOCALIZATION_TO_ORGANELLE.html	2.03015	0	0.000794501
GOBP_PEPTIDE_METABOLIC_PROCESS	http://www.gsea-msigdb.org/gsea/msigdb/human/geneset/GOBP_PEPTIDE_METABOLIC_PROCESS.html	2.02974	0	0.000779222
GOBP_POSITIVE_REGULATION_OF_CATION_TRANSMEMBRANE_TRANSPORT	http://www.gsea-msigdb.org/gsea/msigdb/human/geneset/GOBP_POSITIVE_REGULATION_OF_CATION_TRANSMEMBRANE_TRANSPORT.html	2.01733	0	0.00092659
GOBP_SODIUM_ION_TRANSMEMBRANE_TRANSPORT	http://www.gsea-msigdb.org/gsea/msigdb/human/geneset/GOBP_SODIUM_ION_TRANSMEMBRANE_TRANSPORT.html	2.01576	0	0.000925332
GOBP_INORGANIC_ION_TRANSMEMBRANE_TRANSPORT	http://www.gsea-msigdb.org/gsea/msigdb/human/geneset/GOBP_INORGANIC_ION_TRANSMEMBRANE_TRANSPORT.html	2.01338	0	0.000940066
GOBP_POSITIVE_REGULATION_OF_CALCIUM_ION_TRANSPORT	http://www.gsea-msigdb.org/gsea/msigdb/human/geneset/GOBP_POSITIVE_REGULATION_OF_CALCIUM_ION_TRANSPORT.html	2.00654	0	0.00103082
GOBP_CATION_TRANSPORT	http://www.gsea-msigdb.org/gsea/msigdb/human/geneset/GOBP_CATION_TRANSPORT.html	1.99728	0	0.0012095
GOBP_NEURON_PROJECTION_ORGANIZATION	http://www.gsea-msigdb.org/gsea/msigdb/human/geneset/GOBP_NEURON_PROJECTION_ORGANIZATION.html	1.98946	0	0.0013372
GOBP_TRANSMISSION_OF_NERVE_IMPULSE	http://www.gsea-msigdb.org/gsea/msigdb/human/geneset/GOBP_TRANSMISSION_OF_NERVE_IMPULSE.html	1.98708	0	0.0014466
GOBP_REGULATION_OF_POSTSYNAPSE_ORGANIZATION	http://www.gsea-msigdb.org/gsea/msigdb/human/geneset/GOBP_REGULATION_OF_POSTSYNAPSE_ORGANIZATION.html	1.97133	0	0.00176762
GOBP_RIBONUCLEOPROTEIN_COMPLEX_BIOGENESIS	http://www.gsea-msigdb.org/gsea/msigdb/human/geneset/GOBP_RIBONUCLEOPROTEIN_COMPLEX_BIOGENESIS.html	1.96891	0	0.00182347
GOBP_CALCIUM_ION_REGULATED_EXOCYTOSIS	http://www.gsea-msigdb.org/gsea/msigdb/human/geneset/GOBP_CALCIUM_ION_REGULATED_EXOCYTOSIS.html	1.96643	0	0.00184959
GOBP_RIBOSOME_BIOGENESIS	http://www.gsea-msigdb.org/gsea/msigdb/human/geneset/GOBP_RIBOSOME_BIOGENESIS.html	1.96641	0	0.00182023
GOBP_PRESYNAPTIC_ENDOCYTOSIS	http://www.gsea-msigdb.org/gsea/msigdb/human/geneset/GOBP_PRESYNAPTIC_ENDOCYTOSIS.html	1.95465	0	0.00210193
GOBP_POSITIVE_REGULATION_OF_CALCIUM_ION_TRANSMEMBRANE_TRANSPORT	http://www.gsea-msigdb.org/gsea/msigdb/human/geneset/GOBP_POSITIVE_REGULATION_OF_CALCIUM_ION_TRANSMEMBRANE_TRANSPORT.html	1.93313	0	0.00309153
GOBP_REGULATION_OF_SYNAPSE_STRUCTURE_OR_ACTIVITY	http://www.gsea-msigdb.org/gsea/msigdb/human/geneset/GOBP_REGULATION_OF_SYNAPSE_STRUCTURE_OR_ACTIVITY.html	1.93067	0	0.00316206
GOBP_MITOCHONDRIAL_ELECTRON_TRANSPORT_NADH_TO_UBIQUINONE	http://www.gsea-msigdb.org/gsea/msigdb/human/geneset/GOBP_MITOCHONDRIAL_ELECTRON_TRANSPORT_NADH_TO_UBIQUINONE.html	1.92996	0.00122699	0.00312772
GOBP_AMIDE_BIOSYNTHETIC_PROCESS	http://www.gsea-msigdb.org/gsea/msigdb/human/geneset/GOBP_AMIDE_BIOSYNTHETIC_PROCESS.html	1.92674	0	0.0032965
GOBP_POSITIVE_REGULATION_OF_TRANSPORTER_ACTIVITY	http://www.gsea-msigdb.org/gsea/msigdb/human/geneset/GOBP_POSITIVE_REGULATION_OF_TRANSPORTER_ACTIVITY.html	1.92647	0	0.00326122
GOBP_SYNAPTIC_VESICLE_RECYCLING	http://www.gsea-msigdb.org/gsea/msigdb/human/geneset/GOBP_SYNAPTIC_VESICLE_RECYCLING.html	1.91921	0	0.00349706
GOBP_MULTICELLULAR_ORGANISMAL_SIGNALING	http://www.gsea-msigdb.org/gsea/msigdb/human/geneset/GOBP_MULTICELLULAR_ORGANISMAL_SIGNALING.html	1.91732	0	0.00354511
GOBP_SYNAPTIC_VESICLE_LOCALIZATION	http://www.gsea-msigdb.org/gsea/msigdb/human/geneset/GOBP_SYNAPTIC_VESICLE_LOCALIZATION.html	1.91611	0	0.00357947
GOBP_ATP_METABOLIC_PROCESS	http://www.gsea-msigdb.org/gsea/msigdb/human/geneset/GOBP_ATP_METABOLIC_PROCESS.html	1.91487	0	0.00361337
GOBP_ORGANIC_CYCLIC_COMPOUND_CATABOLIC_PROCESS	http://www.gsea-msigdb.org/gsea/msigdb/human/geneset/GOBP_ORGANIC_CYCLIC_COMPOUND_CATABOLIC_PROCESS.html	1.89958	0	0.00458963
GOBP_NEGATIVE_REGULATION_OF_TRANSMEMBRANE_TRANSPORT	http://www.gsea-msigdb.org/gsea/msigdb/human/geneset/GOBP_NEGATIVE_REGULATION_OF_TRANSMEMBRANE_TRANSPORT.html	1.89789	0.00115607	0.00458582
GOBP_PROTEIN_LOCALIZATION_TO_SYNAPSE	http://www.gsea-msigdb.org/gsea/msigdb/human/geneset/GOBP_PROTEIN_LOCALIZATION_TO_SYNAPSE.html	1.89018	0	0.00512799
GOBP_RIBONUCLEOPROTEIN_COMPLEX_SUBUNIT_ORGANIZATION	http://www.gsea-msigdb.org/gsea/msigdb/human/geneset/GOBP_RIBONUCLEOPROTEIN_COMPLEX_SUBUNIT_ORGANIZATION.html	1.8882	0	0.00517323
GOBP_ELECTRON_TRANSPORT_CHAIN	http://www.gsea-msigdb.org/gsea/msigdb/human/geneset/GOBP_ELECTRON_TRANSPORT_CHAIN.html	1.88274	0	0.00554947
GOBP_LEARNING	http://www.gsea-msigdb.org/gsea/msigdb/human/geneset/GOBP_LEARNING.html	1.88115	0	0.0055668
GOBP_POSITIVE_REGULATION_OF_CALCIUM_ION_TRANSMEMBRANE_TRANSPORTER_ACTIVITY	http://www.gsea-msigdb.org/gsea/msigdb/human/geneset/GOBP_POSITIVE_REGULATION_OF_CALCIUM_ION_TRANSMEMBRANE_TRANSPORTER_ACTIVITY.html	1.87742	0	0.00583172
GOBP_PHAGOSOME_MATURATION	http://www.gsea-msigdb.org/gsea/msigdb/human/geneset/GOBP_PHAGOSOME_MATURATION.html	1.87508	0	0.00594062
GOBP_POSITIVE_REGULATION_OF_SYNAPTIC_TRANSMISSION	http://www.gsea-msigdb.org/gsea/msigdb/human/geneset/GOBP_POSITIVE_REGULATION_OF_SYNAPTIC_TRANSMISSION.html	1.87424	0	0.00589981
GOBP_SYNAPSE_ASSEMBLY	http://www.gsea-msigdb.org/gsea/msigdb/human/geneset/GOBP_SYNAPSE_ASSEMBLY.html	1.87406	0	0.00584945
GOBP_PEPTIDYL_CYSTEINE_MODIFICATION	http://www.gsea-msigdb.org/gsea/msigdb/human/geneset/GOBP_PEPTIDYL_CYSTEINE_MODIFICATION.html	1.86355	0	0.00685761
GOBP_POSITIVE_REGULATION_OF_CATION_CHANNEL_ACTIVITY	http://www.gsea-msigdb.org/gsea/msigdb/human/geneset/GOBP_POSITIVE_REGULATION_OF_CATION_CHANNEL_ACTIVITY.html	1.86038	0	0.0070103
GOBP_EPHRIN_RECEPTOR_SIGNALING_PATHWAY	http://www.gsea-msigdb.org/gsea/msigdb/human/geneset/GOBP_EPHRIN_RECEPTOR_SIGNALING_PATHWAY.html	1.85113	0.0011534	0.00807931
GOBP_NEURON_RECOGNITION	http://www.gsea-msigdb.org/gsea/msigdb/human/geneset/GOBP_NEURON_RECOGNITION.html	1.84997	0	0.00814482
GOBP_SYNAPTIC_TRANSMISSION_GLUTAMATERGIC	http://www.gsea-msigdb.org/gsea/msigdb/human/geneset/GOBP_SYNAPTIC_TRANSMISSION_GLUTAMATERGIC.html	1.84896	0	0.00815014
GOBP_REGULATION_OF_NEURONAL_SYNAPTIC_PLASTICITY	http://www.gsea-msigdb.org/gsea/msigdb/human/geneset/GOBP_REGULATION_OF_NEURONAL_SYNAPTIC_PLASTICITY.html	1.84883	0.00253165	0.00808765
GOBP_MRNA_METABOLIC_PROCESS	http://www.gsea-msigdb.org/gsea/msigdb/human/geneset/GOBP_MRNA_METABOLIC_PROCESS.html	1.84361	0	0.00856263
GOBP_SYNAPSE_ORGANIZATION	http://www.gsea-msigdb.org/gsea/msigdb/human/geneset/GOBP_SYNAPSE_ORGANIZATION.html	1.84165	0	0.00873424
GOBP_CELL_COMMUNICATION_BY_ELECTRICAL_COUPLING	http://www.gsea-msigdb.org/gsea/msigdb/human/geneset/GOBP_CELL_COMMUNICATION_BY_ELECTRICAL_COUPLING.html	1.84163	0	0.00863931
GOBP_RECEPTOR_LOCALIZATION_TO_SYNAPSE	http://www.gsea-msigdb.org/gsea/msigdb/human/geneset/GOBP_RECEPTOR_LOCALIZATION_TO_SYNAPSE.html	1.84129	0.00116959	0.00856493
GOBP_TRANSFERRIN_TRANSPORT	http://www.gsea-msigdb.org/gsea/msigdb/human/geneset/GOBP_TRANSFERRIN_TRANSPORT.html	1.83674	0.00256082	0.00883097
GOBP_LONG_TERM_SYNAPTIC_POTENTIATION	http://www.gsea-msigdb.org/gsea/msigdb/human/geneset/GOBP_LONG_TERM_SYNAPTIC_POTENTIATION.html	1.83239	0	0.00930073
GOBP_REGULATION_OF_UBIQUITIN_PROTEIN_TRANSFERASE_ACTIVITY	http://www.gsea-msigdb.org/gsea/msigdb/human/geneset/GOBP_REGULATION_OF_UBIQUITIN_PROTEIN_TRANSFERASE_ACTIVITY.html	1.82854	0.00242718	0.00977807
GOBP_REGULATION_OF_SODIUM_ION_TRANSMEMBRANE_TRANSPORTER_ACTIVITY	http://www.gsea-msigdb.org/gsea/msigdb/human/geneset/GOBP_REGULATION_OF_SODIUM_ION_TRANSMEMBRANE_TRANSPORTER_ACTIVITY.html	1.82582	0.00243309	0.0100779
GOBP_CELLULAR_AMIDE_METABOLIC_PROCESS	http://www.gsea-msigdb.org/gsea/msigdb/human/geneset/GOBP_CELLULAR_AMIDE_METABOLIC_PROCESS.html	1.82414	0	0.0101682
GOBP_PROTEIN_LOCALIZATION_TO_CELL_JUNCTION	http://www.gsea-msigdb.org/gsea/msigdb/human/geneset/GOBP_PROTEIN_LOCALIZATION_TO_CELL_JUNCTION.html	1.82335	0	0.010248
GOBP_CYTOPLASMIC_TRANSLATIONAL_INITIATION	http://www.gsea-msigdb.org/gsea/msigdb/human/geneset/GOBP_CYTOPLASMIC_TRANSLATIONAL_INITIATION.html	1.8231	0.00123916	0.0101541
GOBP_RESPONSE_TO_INTERLEUKIN_12	http://www.gsea-msigdb.org/gsea/msigdb/human/geneset/GOBP_RESPONSE_TO_INTERLEUKIN_12.html	1.81478	0	0.0112316
GOBP_POTASSIUM_ION_TRANSPORT	http://www.gsea-msigdb.org/gsea/msigdb/human/geneset/GOBP_POTASSIUM_ION_TRANSPORT.html	1.81235	0	0.0115685
GOBP_REGULATION_OF_SYNAPTIC_TRANSMISSION_GLUTAMATERGIC	http://www.gsea-msigdb.org/gsea/msigdb/human/geneset/GOBP_REGULATION_OF_SYNAPTIC_TRANSMISSION_GLUTAMATERGIC.html	1.81092	0.00125628	0.0116737
GOBP_CALCIUM_ION_IMPORT	http://www.gsea-msigdb.org/gsea/msigdb/human/geneset/GOBP_CALCIUM_ION_IMPORT.html	1.80497	0	0.0125157
GOBP_SYNAPTIC_VESICLE_TRANSPORT	http://www.gsea-msigdb.org/gsea/msigdb/human/geneset/GOBP_SYNAPTIC_VESICLE_TRANSPORT.html	1.80429	0.00119617	0.0125852
GOBP_TRANSMEMBRANE_TRANSPORT	http://www.gsea-msigdb.org/gsea/msigdb/human/geneset/GOBP_TRANSMEMBRANE_TRANSPORT.html	1.80004	0	0.0132394
GOBP_REGULATION_OF_HEART_RATE	http://www.gsea-msigdb.org/gsea/msigdb/human/geneset/GOBP_REGULATION_OF_HEART_RATE.html	1.79505	0	0.0140185
GOBP_CELLULAR_RESPIRATION	http://www.gsea-msigdb.org/gsea/msigdb/human/geneset/GOBP_CELLULAR_RESPIRATION.html	1.79362	0	0.0141601
GOBP_RRNA_METABOLIC_PROCESS	http://www.gsea-msigdb.org/gsea/msigdb/human/geneset/GOBP_RRNA_METABOLIC_PROCESS.html	1.79069	0	0.0145912
GOBP_DENDRITIC_SPINE_MORPHOGENESIS	http://www.gsea-msigdb.org/gsea/msigdb/human/geneset/GOBP_DENDRITIC_SPINE_MORPHOGENESIS.html	1.78761	0.00116279	0.0150859
GOBP_SODIUM_ION_TRANSPORT	http://www.gsea-msigdb.org/gsea/msigdb/human/geneset/GOBP_SODIUM_ION_TRANSPORT.html	1.78554	0	0.0153703
GOBP_AMINE_TRANSPORT	http://www.gsea-msigdb.org/gsea/msigdb/human/geneset/GOBP_AMINE_TRANSPORT.html	1.78429	0.00631313	0.0154329
GOBP_NEGATIVE_REGULATION_OF_SYNAPTIC_TRANSMISSION	http://www.gsea-msigdb.org/gsea/msigdb/human/geneset/GOBP_NEGATIVE_REGULATION_OF_SYNAPTIC_TRANSMISSION.html	1.78373	0.0034965	0.0154111
GOBP_POSTSYNAPSE_ORGANIZATION	http://www.gsea-msigdb.org/gsea/msigdb/human/geneset/GOBP_POSTSYNAPSE_ORGANIZATION.html	1.7811	0	0.0159486
GOBP_NADH_DEHYDROGENASE_COMPLEX_ASSEMBLY	http://www.gsea-msigdb.org/gsea/msigdb/human/geneset/GOBP_NADH_DEHYDROGENASE_COMPLEX_ASSEMBLY.html	1.7785	0.00242718	0.0162973
GOBP_ESTABLISHMENT_OF_PROTEIN_LOCALIZATION_TO_MITOCHONDRIAL_MEMBRANE	http://www.gsea-msigdb.org/gsea/msigdb/human/geneset/GOBP_ESTABLISHMENT_OF_PROTEIN_LOCALIZATION_TO_MITOCHONDRIAL_MEMBRANE.html	1.77314	0.00483676	0.0173676
GOBP_INORGANIC_ANION_TRANSPORT	http://www.gsea-msigdb.org/gsea/msigdb/human/geneset/GOBP_INORGANIC_ANION_TRANSPORT.html	1.77022	0.00354191	0.0178155
GOBP_REGULATION_OF_ACTION_POTENTIAL	http://www.gsea-msigdb.org/gsea/msigdb/human/geneset/GOBP_REGULATION_OF_ACTION_POTENTIAL.html	1.77009	0.00123153	0.0177011
GOBP_LOCOMOTORY_BEHAVIOR	http://www.gsea-msigdb.org/gsea/msigdb/human/geneset/GOBP_LOCOMOTORY_BEHAVIOR.html	1.76381	0	0.0190081
GOBP_BIOLOGICAL_PROCESS_INVOLVED_IN_SYMBIOTIC_INTERACTION	http://www.gsea-msigdb.org/gsea/msigdb/human/geneset/GOBP_BIOLOGICAL_PROCESS_INVOLVED_IN_SYMBIOTIC_INTERACTION.html	1.76026	0	0.0196607
GOBP_REGULATION_OF_DENDRITIC_SPINE_MORPHOGENESIS	http://www.gsea-msigdb.org/gsea/msigdb/human/geneset/GOBP_REGULATION_OF_DENDRITIC_SPINE_MORPHOGENESIS.html	1.75622	0.00362757	0.0205307
GOBP_MEMBRANE_BIOGENESIS	http://www.gsea-msigdb.org/gsea/msigdb/human/geneset/GOBP_MEMBRANE_BIOGENESIS.html	1.75586	0.00242718	0.0204542
GOBP_SUBSTANTIA_NIGRA_DEVELOPMENT	http://www.gsea-msigdb.org/gsea/msigdb/human/geneset/GOBP_SUBSTANTIA_NIGRA_DEVELOPMENT.html	1.7539	0.00481928	0.0209187
GOBP_CELL_COMMUNICATION_INVOLVED_IN_CARDIAC_CONDUCTION	http://www.gsea-msigdb.org/gsea/msigdb/human/geneset/GOBP_CELL_COMMUNICATION_INVOLVED_IN_CARDIAC_CONDUCTION.html	1.7477	0.00119904	0.022599
GOBP_BEHAVIOR	http://www.gsea-msigdb.org/gsea/msigdb/human/geneset/GOBP_BEHAVIOR.html	1.74232	0	0.0239972
GOBP_CALCIUM_MEDIATED_SIGNALING	http://www.gsea-msigdb.org/gsea/msigdb/human/geneset/GOBP_CALCIUM_MEDIATED_SIGNALING.html	1.74223	0	0.023834
GOBP_REGULATION_OF_SODIUM_ION_TRANSMEMBRANE_TRANSPORT	http://www.gsea-msigdb.org/gsea/msigdb/human/geneset/GOBP_REGULATION_OF_SODIUM_ION_TRANSMEMBRANE_TRANSPORT.html	1.73729	0.00353774	0.0250379
GOBP_DENDRITIC_SPINE_DEVELOPMENT	http://www.gsea-msigdb.org/gsea/msigdb/human/geneset/GOBP_DENDRITIC_SPINE_DEVELOPMENT.html	1.73631	0.00109051	0.025098
GOBP_REGULATION_OF_SYNAPSE_ASSEMBLY	http://www.gsea-msigdb.org/gsea/msigdb/human/geneset/GOBP_REGULATION_OF_SYNAPSE_ASSEMBLY.html	1.73509	0.00231214	0.0252705
GOBP_ACIDIC_AMINO_ACID_TRANSPORT	http://www.gsea-msigdb.org/gsea/msigdb/human/geneset/GOBP_ACIDIC_AMINO_ACID_TRANSPORT.html	1.73403	0.00352526	0.0253614
GOBP_COGNITION	http://www.gsea-msigdb.org/gsea/msigdb/human/geneset/GOBP_COGNITION.html	1.72482	0.00105597	0.0281284
GOBP_EXOCYTOSIS	http://www.gsea-msigdb.org/gsea/msigdb/human/geneset/GOBP_EXOCYTOSIS.html	1.72374	0	0.0283261
GOBP_CARDIAC_MUSCLE_CELL_ACTION_POTENTIAL_INVOLVED_IN_CONTRACTION	http://www.gsea-msigdb.org/gsea/msigdb/human/geneset/GOBP_CARDIAC_MUSCLE_CELL_ACTION_POTENTIAL_INVOLVED_IN_CONTRACTION.html	1.72282	0.00645161	0.0283851
GOBP_CARDIAC_MUSCLE_CONTRACTION	http://www.gsea-msigdb.org/gsea/msigdb/human/geneset/GOBP_CARDIAC_MUSCLE_CONTRACTION.html	1.72217	0.002331	0.0283337
GOBP_MEMBRANE_FUSION	http://www.gsea-msigdb.org/gsea/msigdb/human/geneset/GOBP_MEMBRANE_FUSION.html	1.71707	0	0.0299317
GOBP_CELLULAR_MONOVALENT_INORGANIC_CATION_HOMEOSTASIS	http://www.gsea-msigdb.org/gsea/msigdb/human/geneset/GOBP_CELLULAR_MONOVALENT_INORGANIC_CATION_HOMEOSTASIS.html	1.71282	0.0023753	0.031271
GOBP_STRIATED_MUSCLE_CONTRACTION	http://www.gsea-msigdb.org/gsea/msigdb/human/geneset/GOBP_STRIATED_MUSCLE_CONTRACTION.html	1.7059	0.00337838	0.0337536
GOBP_SECOND_MESSENGER_MEDIATED_SIGNALING	http://www.gsea-msigdb.org/gsea/msigdb/human/geneset/GOBP_SECOND_MESSENGER_MEDIATED_SIGNALING.html	1.70306	0	0.0345775
GOBP_TRANSLATIONAL_ELONGATION	http://www.gsea-msigdb.org/gsea/msigdb/human/geneset/GOBP_TRANSLATIONAL_ELONGATION.html	1.69923	0.00116414	0.0358675
GOBP_REGULATION_OF_SODIUM_ION_TRANSPORT	http://www.gsea-msigdb.org/gsea/msigdb/human/geneset/GOBP_REGULATION_OF_SODIUM_ION_TRANSPORT.html	1.69585	0.00112867	0.0370832
GOBP_REGULATION_OF_CALCIUM_ION_TRANSMEMBRANE_TRANSPORT	http://www.gsea-msigdb.org/gsea/msigdb/human/geneset/GOBP_REGULATION_OF_CALCIUM_ION_TRANSMEMBRANE_TRANSPORT.html	1.69575	0.00111857	0.036857
GOBP_REGULATION_OF_NERVOUS_SYSTEM_PROCESS	http://www.gsea-msigdb.org/gsea/msigdb/human/geneset/GOBP_REGULATION_OF_NERVOUS_SYSTEM_PROCESS.html	1.69317	0.00231481	0.0377814
GOBP_ACTIN_MEDIATED_CELL_CONTRACTION	http://www.gsea-msigdb.org/gsea/msigdb/human/geneset/GOBP_ACTIN_MEDIATED_CELL_CONTRACTION.html	1.69255	0.00688863	0.0378365
GOBP_REGULATION_OF_AXONOGENESIS	http://www.gsea-msigdb.org/gsea/msigdb/human/geneset/GOBP_REGULATION_OF_AXONOGENESIS.html	1.68849	0	0.0394351
GOBP_AEROBIC_RESPIRATION	http://www.gsea-msigdb.org/gsea/msigdb/human/geneset/GOBP_AEROBIC_RESPIRATION.html	1.68789	0	0.0394009
GOBP_ANTIGEN_PROCESSING_AND_PRESENTATION_OF_PEPTIDE_OR_POLYSACCHARIDE_ANTIGEN_VIA_MHC_CLASS_II	http://www.gsea-msigdb.org/gsea/msigdb/human/geneset/GOBP_ANTIGEN_PROCESSING_AND_PRESENTATION_OF_PEPTIDE_OR_POLYSACCHARIDE_ANTIGEN_VIA_MHC_CLASS_II.html	1.68769	0.00468933	0.0392552
GOBP_ANAPHASE_PROMOTING_COMPLEX_DEPENDENT_CATABOLIC_PROCESS	http://www.gsea-msigdb.org/gsea/msigdb/human/geneset/GOBP_ANAPHASE_PROMOTING_COMPLEX_DEPENDENT_CATABOLIC_PROCESS.html	1.68268	0.00714286	0.0412763
GOBP_POSITIVE_REGULATION_OF_OXIDOREDUCTASE_ACTIVITY	http://www.gsea-msigdb.org/gsea/msigdb/human/geneset/GOBP_POSITIVE_REGULATION_OF_OXIDOREDUCTASE_ACTIVITY.html	1.6807	0.00887199	0.0420289
GOBP_DENDRITE_DEVELOPMENT	http://www.gsea-msigdb.org/gsea/msigdb/human/geneset/GOBP_DENDRITE_DEVELOPMENT.html	1.68049	0	0.041828
GOBP_GLUTAMATE_SECRETION	http://www.gsea-msigdb.org/gsea/msigdb/human/geneset/GOBP_GLUTAMATE_SECRETION.html	1.67973	0.00504414	0.0418423
GOBP_POSITIVE_REGULATION_OF_TRANSMEMBRANE_TRANSPORT	http://www.gsea-msigdb.org/gsea/msigdb/human/geneset/GOBP_POSITIVE_REGULATION_OF_TRANSMEMBRANE_TRANSPORT.html	1.67973	0	0.0415652
GOBP_CRISTAE_FORMATION	http://www.gsea-msigdb.org/gsea/msigdb/human/geneset/GOBP_CRISTAE_FORMATION.html	1.67696	0.0127065	0.0426817
GOBP_ESTABLISHMENT_OF_PROTEIN_LOCALIZATION_TO_PLASMA_MEMBRANE	http://www.gsea-msigdb.org/gsea/msigdb/human/geneset/GOBP_ESTABLISHMENT_OF_PROTEIN_LOCALIZATION_TO_PLASMA_MEMBRANE.html	1.67455	0.00592417	0.0434514
GOBP_REGULATION_OF_PROTEIN_POLYMERIZATION	http://www.gsea-msigdb.org/gsea/msigdb/human/geneset/GOBP_REGULATION_OF_PROTEIN_POLYMERIZATION.html	1.6695	0.00209864	0.0456602
GOBP_VESICLE_LOCALIZATION	http://www.gsea-msigdb.org/gsea/msigdb/human/geneset/GOBP_VESICLE_LOCALIZATION.html	1.66735	0.00104822	0.0464229
GOBP_NEGATIVE_REGULATION_OF_ION_TRANSPORT	http://www.gsea-msigdb.org/gsea/msigdb/human/geneset/GOBP_NEGATIVE_REGULATION_OF_ION_TRANSPORT.html	1.66562	0.00212993	0.0470595
GOBP_NEURON_PROJECTION_EXTENSION_INVOLVED_IN_NEURON_PROJECTION_GUIDANCE	http://www.gsea-msigdb.org/gsea/msigdb/human/geneset/GOBP_NEURON_PROJECTION_EXTENSION_INVOLVED_IN_NEURON_PROJECTION_GUIDANCE.html	1.66427	0.00762389	0.0473909
GOBP_PROTEIN_LOCALIZATION_TO_ORGANELLE	http://www.gsea-msigdb.org/gsea/msigdb/human/geneset/GOBP_PROTEIN_LOCALIZATION_TO_ORGANELLE.html	1.66347	0	0.0475102
GOBP_NEGATIVE_REGULATION_OF_CHEMOTAXIS	http://www.gsea-msigdb.org/gsea/msigdb/human/geneset/GOBP_NEGATIVE_REGULATION_OF_CHEMOTAXIS.html	1.66043	0.0126904	0.0490381
GOBP_NEGATIVE_REGULATION_OF_TRANSPORT	http://www.gsea-msigdb.org/gsea/msigdb/human/geneset/GOBP_NEGATIVE_REGULATION_OF_TRANSPORT.html	1.65796	0.00104058	0.0501053
GOBP_DICARBOXYLIC_ACID_TRANSPORT	http://www.gsea-msigdb.org/gsea/msigdb/human/geneset/GOBP_DICARBOXYLIC_ACID_TRANSPORT.html	1.65532	0.00234742	0.051201
GOBP_NEGATIVE_REGULATION_OF_CATION_TRANSMEMBRANE_TRANSPORT	http://www.gsea-msigdb.org/gsea/msigdb/human/geneset/GOBP_NEGATIVE_REGULATION_OF_CATION_TRANSMEMBRANE_TRANSPORT.html	1.65311	0.00705053	0.0521457
GOBP_DENDRITE_EXTENSION	http://www.gsea-msigdb.org/gsea/msigdb/human/geneset/GOBP_DENDRITE_EXTENSION.html	1.65191	0.0110294	0.052503
GOBP_SIGNAL_RELEASE	http://www.gsea-msigdb.org/gsea/msigdb/human/geneset/GOBP_SIGNAL_RELEASE.html	1.64756	0	0.0546211
GOBP_POSITIVE_REGULATION_OF_PROTEIN_DEPHOSPHORYLATION	http://www.gsea-msigdb.org/gsea/msigdb/human/geneset/GOBP_POSITIVE_REGULATION_OF_PROTEIN_DEPHOSPHORYLATION.html	1.64348	0.0174564	0.0568168
GOBP_CELLULAR_BIOGENIC_AMINE_METABOLIC_PROCESS	http://www.gsea-msigdb.org/gsea/msigdb/human/geneset/GOBP_CELLULAR_BIOGENIC_AMINE_METABOLIC_PROCESS.html	1.64249	0.0121212	0.0571599
GOBP_REGULATION_OF_STRIATED_MUSCLE_CONTRACTION	http://www.gsea-msigdb.org/gsea/msigdb/human/geneset/GOBP_REGULATION_OF_STRIATED_MUSCLE_CONTRACTION.html	1.64224	0.00612745	0.0570239
GOBP_EXOCYTIC_PROCESS	http://www.gsea-msigdb.org/gsea/msigdb/human/geneset/GOBP_EXOCYTIC_PROCESS.html	1.64031	0.0150812	0.0579207
GOBP_CELLULAR_ION_HOMEOSTASIS	http://www.gsea-msigdb.org/gsea/msigdb/human/geneset/GOBP_CELLULAR_ION_HOMEOSTASIS.html	1.64011	0	0.0576849
GOBP_AMINO_ACID_TRANSPORT	http://www.gsea-msigdb.org/gsea/msigdb/human/geneset/GOBP_AMINO_ACID_TRANSPORT.html	1.63747	0.003386	0.0590304
GOBP_ACTIN_POLYMERIZATION_OR_DEPOLYMERIZATION	http://www.gsea-msigdb.org/gsea/msigdb/human/geneset/GOBP_ACTIN_POLYMERIZATION_OR_DEPOLYMERIZATION.html	1.63733	0.00105485	0.0587758
GOBP_ACTIN_FILAMENT_BASED_MOVEMENT	http://www.gsea-msigdb.org/gsea/msigdb/human/geneset/GOBP_ACTIN_FILAMENT_BASED_MOVEMENT.html	1.63633	0.00784753	0.0590855
GOBP_REGULATION_OF_CARDIAC_MUSCLE_CONTRACTION	http://www.gsea-msigdb.org/gsea/msigdb/human/geneset/GOBP_REGULATION_OF_CARDIAC_MUSCLE_CONTRACTION.html	1.6358	0.00846433	0.0591421
GOBP_REGULATION_OF_AMYLOID_PRECURSOR_PROTEIN_CATABOLIC_PROCESS	http://www.gsea-msigdb.org/gsea/msigdb/human/geneset/GOBP_REGULATION_OF_AMYLOID_PRECURSOR_PROTEIN_CATABOLIC_PROCESS.html	1.63439	0.0111386	0.0596741
GOBP_NEURON_PROJECTION_EXTENSION	http://www.gsea-msigdb.org/gsea/msigdb/human/geneset/GOBP_NEURON_PROJECTION_EXTENSION.html	1.63414	0.00108225	0.0594567
GOBP_NEURAL_NUCLEUS_DEVELOPMENT	http://www.gsea-msigdb.org/gsea/msigdb/human/geneset/GOBP_NEURAL_NUCLEUS_DEVELOPMENT.html	1.63269	0.00822562	0.0600789
GOBP_RNA_SPLICING_VIA_TRANSESTERIFICATION_REACTIONS	http://www.gsea-msigdb.org/gsea/msigdb/human/geneset/GOBP_RNA_SPLICING_VIA_TRANSESTERIFICATION_REACTIONS.html	1.63264	0	0.0597735
GOBP_DENDRITE_MORPHOGENESIS	http://www.gsea-msigdb.org/gsea/msigdb/human/geneset/GOBP_DENDRITE_MORPHOGENESIS.html	1.63223	0.00434311	0.0596696
GOBP_REGULATION_OF_ION_TRANSPORT	http://www.gsea-msigdb.org/gsea/msigdb/human/geneset/GOBP_REGULATION_OF_ION_TRANSPORT.html	1.63021	0	0.0605779
GOBP_RNA_SPLICING	http://www.gsea-msigdb.org/gsea/msigdb/human/geneset/GOBP_RNA_SPLICING.html	1.62833	0	0.0612668
GOBP_NEGATIVE_REGULATION_OF_RNA_SPLICING	http://www.gsea-msigdb.org/gsea/msigdb/human/geneset/GOBP_NEGATIVE_REGULATION_OF_RNA_SPLICING.html	1.62769	0.0102564	0.061281
GOBP_ADULT_BEHAVIOR	http://www.gsea-msigdb.org/gsea/msigdb/human/geneset/GOBP_ADULT_BEHAVIOR.html	1.62685	0.00812065	0.0615404
GOBP_REGULATION_OF_METAL_ION_TRANSPORT	http://www.gsea-msigdb.org/gsea/msigdb/human/geneset/GOBP_REGULATION_OF_METAL_ION_TRANSPORT.html	1.62496	0.00108932	0.0623867
GOBP_MEMBRANE_ORGANIZATION	http://www.gsea-msigdb.org/gsea/msigdb/human/geneset/GOBP_MEMBRANE_ORGANIZATION.html	1.62171	0	0.0641972
GOBP_REGULATION_OF_ACTIN_FILAMENT_LENGTH	http://www.gsea-msigdb.org/gsea/msigdb/human/geneset/GOBP_REGULATION_OF_ACTIN_FILAMENT_LENGTH.html	1.61848	0.00429646	0.0659851
GOBP_FC_RECEPTOR_MEDIATED_STIMULATORY_SIGNALING_PATHWAY	http://www.gsea-msigdb.org/gsea/msigdb/human/geneset/GOBP_FC_RECEPTOR_MEDIATED_STIMULATORY_SIGNALING_PATHWAY.html	1.61582	0.00561167	0.0675401
GOBP_ANTIGEN_PROCESSING_AND_PRESENTATION_OF_PEPTIDE_ANTIGEN	http://www.gsea-msigdb.org/gsea/msigdb/human/geneset/GOBP_ANTIGEN_PROCESSING_AND_PRESENTATION_OF_PEPTIDE_ANTIGEN.html	1.61369	0.00110497	0.0686162
GOBP_HOMOPHILIC_CELL_ADHESION_VIA_PLASMA_MEMBRANE_ADHESION_MOLECULES	http://www.gsea-msigdb.org/gsea/msigdb/human/geneset/GOBP_HOMOPHILIC_CELL_ADHESION_VIA_PLASMA_MEMBRANE_ADHESION_MOLECULES.html	1.61212	0.00588235	0.0693925
GOBP_CELL_CELL_ADHESION_VIA_PLASMA_MEMBRANE_ADHESION_MOLECULES	http://www.gsea-msigdb.org/gsea/msigdb/human/geneset/GOBP_CELL_CELL_ADHESION_VIA_PLASMA_MEMBRANE_ADHESION_MOLECULES.html	1.61185	0.00219058	0.0692489
GOBP_NEGATIVE_REGULATION_OF_AXONOGENESIS	http://www.gsea-msigdb.org/gsea/msigdb/human/geneset/GOBP_NEGATIVE_REGULATION_OF_AXONOGENESIS.html	1.60992	0.00715137	0.0702045
GOBP_POSITIVE_REGULATION_OF_SODIUM_ION_TRANSPORT	http://www.gsea-msigdb.org/gsea/msigdb/human/geneset/GOBP_POSITIVE_REGULATION_OF_SODIUM_ION_TRANSPORT.html	1.60933	0.0201511	0.0701708
GOBP_REGULATION_OF_SECRETION	http://www.gsea-msigdb.org/gsea/msigdb/human/geneset/GOBP_REGULATION_OF_SECRETION.html	1.6088	0	0.0701647
GOBP_IRON_ION_TRANSPORT	http://www.gsea-msigdb.org/gsea/msigdb/human/geneset/GOBP_IRON_ION_TRANSPORT.html	1.60833	0.00960384	0.0701183
GOBP_POSITIVE_REGULATION_OF_DEPHOSPHORYLATION	http://www.gsea-msigdb.org/gsea/msigdb/human/geneset/GOBP_POSITIVE_REGULATION_OF_DEPHOSPHORYLATION.html	1.60594	0.0110294	0.0715115
GOBP_ION_HOMEOSTASIS	http://www.gsea-msigdb.org/gsea/msigdb/human/geneset/GOBP_ION_HOMEOSTASIS.html	1.60459	0	0.0721385
GOBP_POSITIVE_REGULATION_OF_PROTEIN_POLYMERIZATION	http://www.gsea-msigdb.org/gsea/msigdb/human/geneset/GOBP_POSITIVE_REGULATION_OF_PROTEIN_POLYMERIZATION.html	1.60156	0.00884956	0.073811
GOBP_REGULATION_OF_DENDRITIC_SPINE_DEVELOPMENT	http://www.gsea-msigdb.org/gsea/msigdb/human/geneset/GOBP_REGULATION_OF_DENDRITIC_SPINE_DEVELOPMENT.html	1.60111	0.0129108	0.0737167
GOBP_POSITIVE_REGULATION_OF_EXOCYTOSIS	http://www.gsea-msigdb.org/gsea/msigdb/human/geneset/GOBP_POSITIVE_REGULATION_OF_EXOCYTOSIS.html	1.60081	0.0127907	0.0736141
GOBP_MEMORY	http://www.gsea-msigdb.org/gsea/msigdb/human/geneset/GOBP_MEMORY.html	1.60013	0.0105018	0.0737895
GOBP_MONOCARBOXYLIC_ACID_TRANSPORT	http://www.gsea-msigdb.org/gsea/msigdb/human/geneset/GOBP_MONOCARBOXYLIC_ACID_TRANSPORT.html	1.59912	0.00554324	0.0742
GOBP_NEGATIVE_REGULATION_OF_UBIQUITIN_DEPENDENT_PROTEIN_CATABOLIC_PROCESS	http://www.gsea-msigdb.org/gsea/msigdb/human/geneset/GOBP_NEGATIVE_REGULATION_OF_UBIQUITIN_DEPENDENT_PROTEIN_CATABOLIC_PROCESS.html	1.59802	0.0142857	0.0746157
GOBP_POSITIVE_REGULATION_OF_AXONOGENESIS	http://www.gsea-msigdb.org/gsea/msigdb/human/geneset/GOBP_POSITIVE_REGULATION_OF_AXONOGENESIS.html	1.59554	0.0103806	0.0761064
GOBP_NERVOUS_SYSTEM_PROCESS	http://www.gsea-msigdb.org/gsea/msigdb/human/geneset/GOBP_NERVOUS_SYSTEM_PROCESS.html	1.59413	0	0.0768518
GOBP_REGULATION_OF_SUPRAMOLECULAR_FIBER_ORGANIZATION	http://www.gsea-msigdb.org/gsea/msigdb/human/geneset/GOBP_REGULATION_OF_SUPRAMOLECULAR_FIBER_ORGANIZATION.html	1.59387	0	0.0766397
GOBP_REGULATION_OF_VESICLE_MEDIATED_TRANSPORT	http://www.gsea-msigdb.org/gsea/msigdb/human/geneset/GOBP_REGULATION_OF_VESICLE_MEDIATED_TRANSPORT.html	1.59057	0	0.0788017
GOBP_CELL_MORPHOGENESIS_INVOLVED_IN_NEURON_DIFFERENTIATION	http://www.gsea-msigdb.org/gsea/msigdb/human/geneset/GOBP_CELL_MORPHOGENESIS_INVOLVED_IN_NEURON_DIFFERENTIATION.html	1.59028	0	0.0786114
GOBP_NEGATIVE_REGULATION_OF_GENE_EXPRESSION	http://www.gsea-msigdb.org/gsea/msigdb/human/geneset/GOBP_NEGATIVE_REGULATION_OF_GENE_EXPRESSION.html	1.58657	0	0.0810972
GOBP_RESPONSE_TO_CALCIUM_ION	http://www.gsea-msigdb.org/gsea/msigdb/human/geneset/GOBP_RESPONSE_TO_CALCIUM_ION.html	1.58632	0.00443459	0.0809231
GOBP_MONOVALENT_INORGANIC_CATION_HOMEOSTASIS	http://www.gsea-msigdb.org/gsea/msigdb/human/geneset/GOBP_MONOVALENT_INORGANIC_CATION_HOMEOSTASIS.html	1.58578	0.00563063	0.0809313
GOBP_REGULATION_OF_ACTIN_FILAMENT_ORGANIZATION	http://www.gsea-msigdb.org/gsea/msigdb/human/geneset/GOBP_REGULATION_OF_ACTIN_FILAMENT_ORGANIZATION.html	1.58159	0.00105263	0.0839528
GOBP_CELLULAR_PROTEIN_CONTAINING_COMPLEX_ASSEMBLY	http://www.gsea-msigdb.org/gsea/msigdb/human/geneset/GOBP_CELLULAR_PROTEIN_CONTAINING_COMPLEX_ASSEMBLY.html	1.58081	0	0.084237
GOBP_ATP_BIOSYNTHETIC_PROCESS	http://www.gsea-msigdb.org/gsea/msigdb/human/geneset/GOBP_ATP_BIOSYNTHETIC_PROCESS.html	1.57924	0.0261593	0.0850753
GOBP_NEGATIVE_REGULATION_OF_PROTEOLYSIS_INVOLVED_IN_CELLULAR_PROTEIN_CATABOLIC_PROCESS	http://www.gsea-msigdb.org/gsea/msigdb/human/geneset/GOBP_NEGATIVE_REGULATION_OF_PROTEOLYSIS_INVOLVED_IN_CELLULAR_PROTEIN_CATABOLIC_PROCESS.html	1.57879	0.0118624	0.0850359
GOBP_REGULATION_OF_CALCIUM_ION_TRANSMEMBRANE_TRANSPORTER_ACTIVITY	http://www.gsea-msigdb.org/gsea/msigdb/human/geneset/GOBP_REGULATION_OF_CALCIUM_ION_TRANSMEMBRANE_TRANSPORTER_ACTIVITY.html	1.57744	0.0144578	0.0856828
GOBP_CALCIUM_ION_TRANSPORT	http://www.gsea-msigdb.org/gsea/msigdb/human/geneset/GOBP_CALCIUM_ION_TRANSPORT.html	1.57693	0	0.085709
GOBP_NEGATIVE_REGULATION_OF_PROTEOLYSIS	http://www.gsea-msigdb.org/gsea/msigdb/human/geneset/GOBP_NEGATIVE_REGULATION_OF_PROTEOLYSIS.html	1.5767	0.0021692	0.0855158
GOBP_PH_REDUCTION	http://www.gsea-msigdb.org/gsea/msigdb/human/geneset/GOBP_PH_REDUCTION.html	1.57607	0.025641	0.0856697
GOBP_LIPID_EXPORT_FROM_CELL	http://www.gsea-msigdb.org/gsea/msigdb/human/geneset/GOBP_LIPID_EXPORT_FROM_CELL.html	1.57432	0.0172612	0.0868314
GOBP_MITOCHONDRIAL_RESPIRATORY_CHAIN_COMPLEX_ASSEMBLY	http://www.gsea-msigdb.org/gsea/msigdb/human/geneset/GOBP_MITOCHONDRIAL_RESPIRATORY_CHAIN_COMPLEX_ASSEMBLY.html	1.57123	0.0154394	0.0890474
GOBP_ASSOCIATIVE_LEARNING	http://www.gsea-msigdb.org/gsea/msigdb/human/geneset/GOBP_ASSOCIATIVE_LEARNING.html	1.57083	0.0134146	0.0889639
GOBP_NEGATIVE_REGULATION_OF_CELLULAR_PROTEIN_CATABOLIC_PROCESS	http://www.gsea-msigdb.org/gsea/msigdb/human/geneset/GOBP_NEGATIVE_REGULATION_OF_CELLULAR_PROTEIN_CATABOLIC_PROCESS.html	1.57068	0.0141677	0.0886745
GOBP_DEVELOPMENTAL_CELL_GROWTH	http://www.gsea-msigdb.org/gsea/msigdb/human/geneset/GOBP_DEVELOPMENTAL_CELL_GROWTH.html	1.56796	0.00314795	0.0904649
GOBP_CALCIUM_ION_TRANSMEMBRANE_TRANSPORT	http://www.gsea-msigdb.org/gsea/msigdb/human/geneset/GOBP_CALCIUM_ION_TRANSMEMBRANE_TRANSPORT.html	1.56557	0.00106383	0.092268
GOBP_PROTEIN_LOCALIZATION_TO_POSTSYNAPSE	http://www.gsea-msigdb.org/gsea/msigdb/human/geneset/GOBP_PROTEIN_LOCALIZATION_TO_POSTSYNAPSE.html	1.56528	0.0228426	0.0921449
GOBP_POSITIVE_REGULATION_OF_CYTOSKELETON_ORGANIZATION	http://www.gsea-msigdb.org/gsea/msigdb/human/geneset/GOBP_POSITIVE_REGULATION_OF_CYTOSKELETON_ORGANIZATION.html	1.56293	0.00211193	0.0937895
GOBP_NEGATIVE_REGULATION_OF_TRANSPORTER_ACTIVITY	http://www.gsea-msigdb.org/gsea/msigdb/human/geneset/GOBP_NEGATIVE_REGULATION_OF_TRANSPORTER_ACTIVITY.html	1.56271	0.0168472	0.0935539
GOBP_REGULATION_OF_POTASSIUM_ION_TRANSMEMBRANE_TRANSPORTER_ACTIVITY	http://www.gsea-msigdb.org/gsea/msigdb/human/geneset/GOBP_REGULATION_OF_POTASSIUM_ION_TRANSMEMBRANE_TRANSPORTER_ACTIVITY.html	1.56203	0.0247934	0.0937645
GOBP_PROTEIN_POLYMERIZATION	http://www.gsea-msigdb.org/gsea/msigdb/human/geneset/GOBP_PROTEIN_POLYMERIZATION.html	1.56183	0	0.0935387
GOBP_MITOCHONDRIAL_MEMBRANE_ORGANIZATION	http://www.gsea-msigdb.org/gsea/msigdb/human/geneset/GOBP_MITOCHONDRIAL_MEMBRANE_ORGANIZATION.html	1.55596	0.0077951	0.0982838
GOBP_CELLULAR_HOMEOSTASIS	http://www.gsea-msigdb.org/gsea/msigdb/human/geneset/GOBP_CELLULAR_HOMEOSTASIS.html	1.55245	0	0.101
GOBP_METAL_ION_TRANSPORT	http://www.gsea-msigdb.org/gsea/msigdb/human/geneset/GOBP_METAL_ION_TRANSPORT.html	1.55234	0.0010352	0.100664
GOBP_ORGANELLE_DISASSEMBLY	http://www.gsea-msigdb.org/gsea/msigdb/human/geneset/GOBP_ORGANELLE_DISASSEMBLY.html	1.55159	0.0167785	0.100939
GOBP_CELL_RECOGNITION	http://www.gsea-msigdb.org/gsea/msigdb/human/geneset/GOBP_CELL_RECOGNITION.html	1.55089	0.0194064	0.101157
GOBP_NEUROMUSCULAR_PROCESS	http://www.gsea-msigdb.org/gsea/msigdb/human/geneset/GOBP_NEUROMUSCULAR_PROCESS.html	1.54955	0.0190024	0.10204
GOBP_AUTOPHAGY_OF_MITOCHONDRION	http://www.gsea-msigdb.org/gsea/msigdb/human/geneset/GOBP_AUTOPHAGY_OF_MITOCHONDRION.html	1.54857	0.0117371	0.102534
GOBP_POSITIVE_REGULATION_OF_NERVOUS_SYSTEM_DEVELOPMENT	http://www.gsea-msigdb.org/gsea/msigdb/human/geneset/GOBP_POSITIVE_REGULATION_OF_NERVOUS_SYSTEM_DEVELOPMENT.html	1.54844	0.0031881	0.102224
GOBP_ORGANELLE_MEMBRANE_FUSION	http://www.gsea-msigdb.org/gsea/msigdb/human/geneset/GOBP_ORGANELLE_MEMBRANE_FUSION.html	1.54631	0.0212054	0.103836
GOBP_INNER_MITOCHONDRIAL_MEMBRANE_ORGANIZATION	http://www.gsea-msigdb.org/gsea/msigdb/human/geneset/GOBP_INNER_MITOCHONDRIAL_MEMBRANE_ORGANIZATION.html	1.54614	0.0199501	0.103563
GOBP_REGULATION_OF_MICROTUBULE_POLYMERIZATION	http://www.gsea-msigdb.org/gsea/msigdb/human/geneset/GOBP_REGULATION_OF_MICROTUBULE_POLYMERIZATION.html	1.54578	0.0199063	0.103487
GOBP_DNA_DAMAGE_RESPONSE_DETECTION_OF_DNA_DAMAGE	http://www.gsea-msigdb.org/gsea/msigdb/human/geneset/GOBP_DNA_DAMAGE_RESPONSE_DETECTION_OF_DNA_DAMAGE.html	1.54561	0.0292249	0.103196
GOBP_PROTEIN_DEPOLYMERIZATION	http://www.gsea-msigdb.org/gsea/msigdb/human/geneset/GOBP_PROTEIN_DEPOLYMERIZATION.html	1.54502	0.0121816	0.10329
GOBP_CELL_JUNCTION_ORGANIZATION	http://www.gsea-msigdb.org/gsea/msigdb/human/geneset/GOBP_CELL_JUNCTION_ORGANIZATION.html	1.5448	0	0.103059
GOBP_MIDBRAIN_DEVELOPMENT	http://www.gsea-msigdb.org/gsea/msigdb/human/geneset/GOBP_MIDBRAIN_DEVELOPMENT.html	1.5443	0.0162602	0.103139
GOBP_PROTEIN_CONTAINING_COMPLEX_LOCALIZATION	http://www.gsea-msigdb.org/gsea/msigdb/human/geneset/GOBP_PROTEIN_CONTAINING_COMPLEX_LOCALIZATION.html	1.54179	0	0.105183
GOBP_RNA_PROCESSING	http://www.gsea-msigdb.org/gsea/msigdb/human/geneset/GOBP_RNA_PROCESSING.html	1.53994	0	0.106608
GOBP_NEGATIVE_REGULATION_OF_CELL_GROWTH	http://www.gsea-msigdb.org/gsea/msigdb/human/geneset/GOBP_NEGATIVE_REGULATION_OF_CELL_GROWTH.html	1.53922	0.00994475	0.106858
GOBP_ANTIGEN_PROCESSING_AND_PRESENTATION	http://www.gsea-msigdb.org/gsea/msigdb/human/geneset/GOBP_ANTIGEN_PROCESSING_AND_PRESENTATION.html	1.53911	0.0054407	0.10653
GOBP_VESICLE_CYTOSKELETAL_TRAFFICKING	http://www.gsea-msigdb.org/gsea/msigdb/human/geneset/GOBP_VESICLE_CYTOSKELETAL_TRAFFICKING.html	1.53828	0.0211516	0.106969
GOBP_SEMAPHORIN_PLEXIN_SIGNALING_PATHWAY	http://www.gsea-msigdb.org/gsea/msigdb/human/geneset/GOBP_SEMAPHORIN_PLEXIN_SIGNALING_PATHWAY.html	1.53827	0.0282413	0.106546
GOBP_REGULATION_OF_DENDRITE_MORPHOGENESIS	http://www.gsea-msigdb.org/gsea/msigdb/human/geneset/GOBP_REGULATION_OF_DENDRITE_MORPHOGENESIS.html	1.53551	0.0235294	0.10902
GOBP_POSITIVE_REGULATION_OF_CELL_JUNCTION_ASSEMBLY	http://www.gsea-msigdb.org/gsea/msigdb/human/geneset/GOBP_POSITIVE_REGULATION_OF_CELL_JUNCTION_ASSEMBLY.html	1.5331	0.016298	0.111072
GOBP_CALCIUM_ION_TRANSPORT_INTO_CYTOSOL	http://www.gsea-msigdb.org/gsea/msigdb/human/geneset/GOBP_CALCIUM_ION_TRANSPORT_INTO_CYTOSOL.html	1.53308	0.0156951	0.110645
GOBP_BIOLOGICAL_PROCESS_INVOLVED_IN_INTRASPECIES_INTERACTION_BETWEEN_ORGANISMS	http://www.gsea-msigdb.org/gsea/msigdb/human/geneset/GOBP_BIOLOGICAL_PROCESS_INVOLVED_IN_INTRASPECIES_INTERACTION_BETWEEN_ORGANISMS.html	1.5314	0.0406404	0.111839
GOBP_MEMBRANE_REPOLARIZATION	http://www.gsea-msigdb.org/gsea/msigdb/human/geneset/GOBP_MEMBRANE_REPOLARIZATION.html	1.53021	0.0360248	0.112676
GOBP_RESPONSE_TO_METAL_ION	http://www.gsea-msigdb.org/gsea/msigdb/human/geneset/GOBP_RESPONSE_TO_METAL_ION.html	1.52656	0.00414508	0.116136
GOBP_NEGATIVE_REGULATION_OF_TRANSFERASE_ACTIVITY	http://www.gsea-msigdb.org/gsea/msigdb/human/geneset/GOBP_NEGATIVE_REGULATION_OF_TRANSFERASE_ACTIVITY.html	1.52483	0.00731452	0.117608
GOBP_NUCLEOSIDE_TRIPHOSPHATE_BIOSYNTHETIC_PROCESS	http://www.gsea-msigdb.org/gsea/msigdb/human/geneset/GOBP_NUCLEOSIDE_TRIPHOSPHATE_BIOSYNTHETIC_PROCESS.html	1.5242	0.0239234	0.117945
GOBP_RNA_LOCALIZATION	http://www.gsea-msigdb.org/gsea/msigdb/human/geneset/GOBP_RNA_LOCALIZATION.html	1.52364	0.00838574	0.118099
GOBP_CARDIAC_CONDUCTION	http://www.gsea-msigdb.org/gsea/msigdb/human/geneset/GOBP_CARDIAC_CONDUCTION.html	1.52241	0.013544	0.118928
GOBP_TRANSITION_METAL_ION_TRANSPORT	http://www.gsea-msigdb.org/gsea/msigdb/human/geneset/GOBP_TRANSITION_METAL_ION_TRANSPORT.html	1.52237	0.0185185	0.118507
GOBP_REGULATION_OF_PH	http://www.gsea-msigdb.org/gsea/msigdb/human/geneset/GOBP_REGULATION_OF_PH.html	1.52097	0.0184332	0.11963
GOBP_REGULATION_OF_RELEASE_OF_SEQUESTERED_CALCIUM_ION_INTO_CYTOSOL	http://www.gsea-msigdb.org/gsea/msigdb/human/geneset/GOBP_REGULATION_OF_RELEASE_OF_SEQUESTERED_CALCIUM_ION_INTO_CYTOSOL.html	1.51947	0.0236127	0.120813
GOBP_NUCLEOTIDE_EXCISION_REPAIR_DNA_INCISION	http://www.gsea-msigdb.org/gsea/msigdb/human/geneset/GOBP_NUCLEOTIDE_EXCISION_REPAIR_DNA_INCISION.html	1.51813	0.0315657	0.121907
GOBP_GOLGI_TO_PLASMA_MEMBRANE_PROTEIN_TRANSPORT	http://www.gsea-msigdb.org/gsea/msigdb/human/geneset/GOBP_GOLGI_TO_PLASMA_MEMBRANE_PROTEIN_TRANSPORT.html	1.51781	0.032967	0.121749
GOBP_AMYLOID_PRECURSOR_PROTEIN_METABOLIC_PROCESS	http://www.gsea-msigdb.org/gsea/msigdb/human/geneset/GOBP_AMYLOID_PRECURSOR_PROTEIN_METABOLIC_PROCESS.html	1.51669	0.0225118	0.122629
GOBP_MYELOID_LEUKOCYTE_MEDIATED_IMMUNITY	http://www.gsea-msigdb.org/gsea/msigdb/human/geneset/GOBP_MYELOID_LEUKOCYTE_MEDIATED_IMMUNITY.html	1.51658	0.0020555	0.122314
GOBP_NCRNA_PROCESSING	http://www.gsea-msigdb.org/gsea/msigdb/human/geneset/GOBP_NCRNA_PROCESSING.html	1.51607	0.00625652	0.122415
GOBP_NEGATIVE_REGULATION_OF_PROTEIN_POLYMERIZATION	http://www.gsea-msigdb.org/gsea/msigdb/human/geneset/GOBP_NEGATIVE_REGULATION_OF_PROTEIN_POLYMERIZATION.html	1.51588	0.030445	0.12216
GOBP_REGULATION_OF_POTASSIUM_ION_TRANSPORT	http://www.gsea-msigdb.org/gsea/msigdb/human/geneset/GOBP_REGULATION_OF_POTASSIUM_ION_TRANSPORT.html	1.51523	0.0251716	0.122411
GOBP_REGULATION_OF_INTRINSIC_APOPTOTIC_SIGNALING_PATHWAY	http://www.gsea-msigdb.org/gsea/msigdb/human/geneset/GOBP_REGULATION_OF_INTRINSIC_APOPTOTIC_SIGNALING_PATHWAY.html	1.51397	0.0133482	0.123286
GOBP_CYTOSOLIC_CALCIUM_ION_TRANSPORT	http://www.gsea-msigdb.org/gsea/msigdb/human/geneset/GOBP_CYTOSOLIC_CALCIUM_ION_TRANSPORT.html	1.51306	0.0152505	0.123836
GOBP_POSITIVE_REGULATION_OF_ACTIN_FILAMENT_POLYMERIZATION	http://www.gsea-msigdb.org/gsea/msigdb/human/geneset/GOBP_POSITIVE_REGULATION_OF_ACTIN_FILAMENT_POLYMERIZATION.html	1.51161	0.0261661	0.125003
GOBP_NEGATIVE_REGULATION_OF_PROTEASOMAL_UBIQUITIN_DEPENDENT_PROTEIN_CATABOLIC_PROCESS	http://www.gsea-msigdb.org/gsea/msigdb/human/geneset/GOBP_NEGATIVE_REGULATION_OF_PROTEASOMAL_UBIQUITIN_DEPENDENT_PROTEIN_CATABOLIC_PROCESS.html	1.5101	0.0399501	0.126202
GOBP_REGULATION_OF_MICROTUBULE_POLYMERIZATION_OR_DEPOLYMERIZATION	http://www.gsea-msigdb.org/gsea/msigdb/human/geneset/GOBP_REGULATION_OF_MICROTUBULE_POLYMERIZATION_OR_DEPOLYMERIZATION.html	1.50712	0.0253165	0.129306
GOBP_POSITIVE_REGULATION_OF_PEPTIDASE_ACTIVITY	http://www.gsea-msigdb.org/gsea/msigdb/human/geneset/GOBP_POSITIVE_REGULATION_OF_PEPTIDASE_ACTIVITY.html	1.50648	0.0140845	0.129578
GOBP_MRNA_PROCESSING	http://www.gsea-msigdb.org/gsea/msigdb/human/geneset/GOBP_MRNA_PROCESSING.html	1.50581	0	0.129883
GOBP_POSTSYNAPTIC_SPECIALIZATION_ORGANIZATION	http://www.gsea-msigdb.org/gsea/msigdb/human/geneset/GOBP_POSTSYNAPTIC_SPECIALIZATION_ORGANIZATION.html	1.5058	0.0458599	0.129415
GOBP_REGULATION_OF_POSTSYNAPTIC_MEMBRANE_NEUROTRANSMITTER_RECEPTOR_LEVELS	http://www.gsea-msigdb.org/gsea/msigdb/human/geneset/GOBP_REGULATION_OF_POSTSYNAPTIC_MEMBRANE_NEUROTRANSMITTER_RECEPTOR_LEVELS.html	1.50337	0.0294118	0.131776
GOBP_CELL_PART_MORPHOGENESIS	http://www.gsea-msigdb.org/gsea/msigdb/human/geneset/GOBP_CELL_PART_MORPHOGENESIS.html	1.50311	0	0.131581
GOBP_INORGANIC_ION_IMPORT_ACROSS_PLASMA_MEMBRANE	http://www.gsea-msigdb.org/gsea/msigdb/human/geneset/GOBP_INORGANIC_ION_IMPORT_ACROSS_PLASMA_MEMBRANE.html	1.50232	0.0340776	0.13199
GOBP_REGULATION_OF_CYTOKINESIS	http://www.gsea-msigdb.org/gsea/msigdb/human/geneset/GOBP_REGULATION_OF_CYTOKINESIS.html	1.50206	0.0266667	0.131811
GOBP_ADULT_LOCOMOTORY_BEHAVIOR	http://www.gsea-msigdb.org/gsea/msigdb/human/geneset/GOBP_ADULT_LOCOMOTORY_BEHAVIOR.html	1.5019	0.0368098	0.131561
GOBP_DEVELOPMENTAL_GROWTH_INVOLVED_IN_MORPHOGENESIS	http://www.gsea-msigdb.org/gsea/msigdb/human/geneset/GOBP_DEVELOPMENTAL_GROWTH_INVOLVED_IN_MORPHOGENESIS.html	1.50147	0.00837696	0.131611
GOBP_REGULATION_OF_CYTOSOLIC_CALCIUM_ION_CONCENTRATION	http://www.gsea-msigdb.org/gsea/msigdb/human/geneset/GOBP_REGULATION_OF_CYTOSOLIC_CALCIUM_ION_CONCENTRATION.html	1.50124	0.0119048	0.131399
GOBP_NCRNA_METABOLIC_PROCESS	http://www.gsea-msigdb.org/gsea/msigdb/human/geneset/GOBP_NCRNA_METABOLIC_PROCESS.html	1.49952	0.00309917	0.132895
GOBP_RNA_EXPORT_FROM_NUCLEUS	http://www.gsea-msigdb.org/gsea/msigdb/human/geneset/GOBP_RNA_EXPORT_FROM_NUCLEUS.html	1.49784	0.0163934	0.134522
GOBP_REGULATION_OF_PROTEIN_AUTOPHOSPHORYLATION	http://www.gsea-msigdb.org/gsea/msigdb/human/geneset/GOBP_REGULATION_OF_PROTEIN_AUTOPHOSPHORYLATION.html	1.49733	0.0369898	0.134653
GOBP_POSTTRANSCRIPTIONAL_REGULATION_OF_GENE_EXPRESSION	http://www.gsea-msigdb.org/gsea/msigdb/human/geneset/GOBP_POSTTRANSCRIPTIONAL_REGULATION_OF_GENE_EXPRESSION.html	1.49634	0	0.13531
GOBP_METAL_ION_HOMEOSTASIS	http://www.gsea-msigdb.org/gsea/msigdb/human/geneset/GOBP_METAL_ION_HOMEOSTASIS.html	1.49529	0	0.136127
GOBP_IMPORT_INTO_CELL	http://www.gsea-msigdb.org/gsea/msigdb/human/geneset/GOBP_IMPORT_INTO_CELL.html	1.49445	0.0222469	0.136645
GOBP_REGULATION_OF_ALTERNATIVE_MRNA_SPLICING_VIA_SPLICEOSOME	http://www.gsea-msigdb.org/gsea/msigdb/human/geneset/GOBP_REGULATION_OF_ALTERNATIVE_MRNA_SPLICING_VIA_SPLICEOSOME.html	1.49419	0.0416667	0.136471
GOBP_LOCALIZATION_WITHIN_MEMBRANE	http://www.gsea-msigdb.org/gsea/msigdb/human/geneset/GOBP_LOCALIZATION_WITHIN_MEMBRANE.html	1.49388	0.0294118	0.136364
GOBP_REGULATION_OF_MRNA_SPLICING_VIA_SPLICEOSOME	http://www.gsea-msigdb.org/gsea/msigdb/human/geneset/GOBP_REGULATION_OF_MRNA_SPLICING_VIA_SPLICEOSOME.html	1.49272	0.0144284	0.137241
GOBP_ORGANELLE_FUSION	http://www.gsea-msigdb.org/gsea/msigdb/human/geneset/GOBP_ORGANELLE_FUSION.html	1.49234	0.0196937	0.137273
GOBP_PROTEIN_CONTAINING_COMPLEX_DISASSEMBLY	http://www.gsea-msigdb.org/gsea/msigdb/human/geneset/GOBP_PROTEIN_CONTAINING_COMPLEX_DISASSEMBLY.html	1.4911	0.00625	0.138412
GOBP_CELLULAR_PROTEIN_COMPLEX_DISASSEMBLY	http://www.gsea-msigdb.org/gsea/msigdb/human/geneset/GOBP_CELLULAR_PROTEIN_COMPLEX_DISASSEMBLY.html	1.49	0.0130577	0.139343
GOBP_ORGANELLE_LOCALIZATION	http://www.gsea-msigdb.org/gsea/msigdb/human/geneset/GOBP_ORGANELLE_LOCALIZATION.html	1.48971	0	0.139228
GOBP_RESPONSE_TO_AMYLOID_BETA	http://www.gsea-msigdb.org/gsea/msigdb/human/geneset/GOBP_RESPONSE_TO_AMYLOID_BETA.html	1.48945	0.0380835	0.139099
GOBP_REGULATION_OF_RNA_SPLICING	http://www.gsea-msigdb.org/gsea/msigdb/human/geneset/GOBP_REGULATION_OF_RNA_SPLICING.html	1.48911	0.0140998	0.139008
GOBP_ALTERNATIVE_MRNA_SPLICING_VIA_SPLICEOSOME	http://www.gsea-msigdb.org/gsea/msigdb/human/geneset/GOBP_ALTERNATIVE_MRNA_SPLICING_VIA_SPLICEOSOME.html	1.48714	0.0328054	0.140961
GOBP_ENDOPLASMIC_RETICULUM_TO_GOLGI_VESICLE_MEDIATED_TRANSPORT	http://www.gsea-msigdb.org/gsea/msigdb/human/geneset/GOBP_ENDOPLASMIC_RETICULUM_TO_GOLGI_VESICLE_MEDIATED_TRANSPORT.html	1.48662	0.00961539	0.141143
GOBP_RELEASE_OF_SEQUESTERED_CALCIUM_ION_INTO_CYTOSOL_BY_ENDOPLASMIC_RETICULUM	http://www.gsea-msigdb.org/gsea/msigdb/human/geneset/GOBP_RELEASE_OF_SEQUESTERED_CALCIUM_ION_INTO_CYTOSOL_BY_ENDOPLASMIC_RETICULUM.html	1.48571	0.0435339	0.141732
GOBP_MAINTENANCE_OF_PROTEIN_LOCATION_IN_CELL	http://www.gsea-msigdb.org/gsea/msigdb/human/geneset/GOBP_MAINTENANCE_OF_PROTEIN_LOCATION_IN_CELL.html	1.48331	0.04	0.144336
GOBP_NEGATIVE_REGULATION_OF_CATALYTIC_ACTIVITY	http://www.gsea-msigdb.org/gsea/msigdb/human/geneset/GOBP_NEGATIVE_REGULATION_OF_CATALYTIC_ACTIVITY.html	1.48317	0.00302725	0.144014
GOBP_POSITIVE_REGULATION_OF_SYNAPSE_ASSEMBLY	http://www.gsea-msigdb.org/gsea/msigdb/human/geneset/GOBP_POSITIVE_REGULATION_OF_SYNAPSE_ASSEMBLY.html	1.48199	0.0332937	0.145003
GOBP_ESTABLISHMENT_OF_RNA_LOCALIZATION	http://www.gsea-msigdb.org/gsea/msigdb/human/geneset/GOBP_ESTABLISHMENT_OF_RNA_LOCALIZATION.html	1.48191	0.00741525	0.144628
GOBP_NEURON_APOPTOTIC_PROCESS	http://www.gsea-msigdb.org/gsea/msigdb/human/geneset/GOBP_NEURON_APOPTOTIC_PROCESS.html	1.48174	0.0158898	0.144387
GOBP_INTERSTRAND_CROSS_LINK_REPAIR	http://www.gsea-msigdb.org/gsea/msigdb/human/geneset/GOBP_INTERSTRAND_CROSS_LINK_REPAIR.html	1.48036	0.043202	0.145667
GOBP_NEUROTRANSMITTER_RECEPTOR_TRANSPORT	http://www.gsea-msigdb.org/gsea/msigdb/human/geneset/GOBP_NEUROTRANSMITTER_RECEPTOR_TRANSPORT.html	1.48022	0.0504305	0.145365
GOBP_REGULATION_OF_CELLULAR_COMPONENT_SIZE	http://www.gsea-msigdb.org/gsea/msigdb/human/geneset/GOBP_REGULATION_OF_CELLULAR_COMPONENT_SIZE.html	1.47896	0.0040858	0.14648
GOBP_RIBONUCLEOSIDE_TRIPHOSPHATE_BIOSYNTHETIC_PROCESS	http://www.gsea-msigdb.org/gsea/msigdb/human/geneset/GOBP_RIBONUCLEOSIDE_TRIPHOSPHATE_BIOSYNTHETIC_PROCESS.html	1.47739	0.0343643	0.14801
GOBP_MACROAUTOPHAGY	http://www.gsea-msigdb.org/gsea/msigdb/human/geneset/GOBP_MACROAUTOPHAGY.html	1.47607	0.0061287	0.149337
GOBP_RESPONSE_TO_CATECHOLAMINE	http://www.gsea-msigdb.org/gsea/msigdb/human/geneset/GOBP_RESPONSE_TO_CATECHOLAMINE.html	1.47518	0.0451389	0.149955
GOBP_ENERGY_DERIVATION_BY_OXIDATION_OF_ORGANIC_COMPOUNDS	http://www.gsea-msigdb.org/gsea/msigdb/human/geneset/GOBP_ENERGY_DERIVATION_BY_OXIDATION_OF_ORGANIC_COMPOUNDS.html	1.47495	0.00630252	0.149811
GOBP_DIVALENT_INORGANIC_CATION_HOMEOSTASIS	http://www.gsea-msigdb.org/gsea/msigdb/human/geneset/GOBP_DIVALENT_INORGANIC_CATION_HOMEOSTASIS.html	1.47266	0.00722394	0.152406
GOBP_NEGATIVE_REGULATION_OF_ANION_TRANSPORT	http://www.gsea-msigdb.org/gsea/msigdb/human/geneset/GOBP_NEGATIVE_REGULATION_OF_ANION_TRANSPORT.html	1.47195	0.0241493	0.152883
GOBP_CELLULAR_COMPONENT_MORPHOGENESIS	http://www.gsea-msigdb.org/gsea/msigdb/human/geneset/GOBP_CELLULAR_COMPONENT_MORPHOGENESIS.html	1.47105	0	0.153488
GOBP_NEGATIVE_REGULATION_OF_NEURON_APOPTOTIC_PROCESS	http://www.gsea-msigdb.org/gsea/msigdb/human/geneset/GOBP_NEGATIVE_REGULATION_OF_NEURON_APOPTOTIC_PROCESS.html	1.47032	0.0284738	0.153943
GOBP_NEURON_CELLULAR_HOMEOSTASIS	http://www.gsea-msigdb.org/gsea/msigdb/human/geneset/GOBP_NEURON_CELLULAR_HOMEOSTASIS.html	1.46767	0.0589711	0.156918
GOBP_VESICLE_MEDIATED_TRANSPORT_TO_THE_PLASMA_MEMBRANE	http://www.gsea-msigdb.org/gsea/msigdb/human/geneset/GOBP_VESICLE_MEDIATED_TRANSPORT_TO_THE_PLASMA_MEMBRANE.html	1.4655	0.027933	0.159358
GOBP_CYTOSKELETON_DEPENDENT_INTRACELLULAR_TRANSPORT	http://www.gsea-msigdb.org/gsea/msigdb/human/geneset/GOBP_CYTOSKELETON_DEPENDENT_INTRACELLULAR_TRANSPORT.html	1.46493	0.0188285	0.159686
GOBP_CELL_MORPHOGENESIS_INVOLVED_IN_DIFFERENTIATION	http://www.gsea-msigdb.org/gsea/msigdb/human/geneset/GOBP_CELL_MORPHOGENESIS_INVOLVED_IN_DIFFERENTIATION.html	1.46058	0	0.165253
GOBP_AMYLOID_PRECURSOR_PROTEIN_CATABOLIC_PROCESS	http://www.gsea-msigdb.org/gsea/msigdb/human/geneset/GOBP_AMYLOID_PRECURSOR_PROTEIN_CATABOLIC_PROCESS.html	1.46045	0.035409	0.164915
GOBP_AMYLOID_BETA_METABOLIC_PROCESS	http://www.gsea-msigdb.org/gsea/msigdb/human/geneset/GOBP_AMYLOID_BETA_METABOLIC_PROCESS.html	1.45634	0.0513126	0.170207
GOBP_TRANSLATIONAL_TERMINATION	http://www.gsea-msigdb.org/gsea/msigdb/human/geneset/GOBP_TRANSLATIONAL_TERMINATION.html	1.45528	0.0573664	0.171192
GOBP_REGULATION_OF_CELLULAR_AMIDE_METABOLIC_PROCESS	http://www.gsea-msigdb.org/gsea/msigdb/human/geneset/GOBP_REGULATION_OF_CELLULAR_AMIDE_METABOLIC_PROCESS.html	1.45507	0.00203666	0.170948
GOBP_SECRETION	http://www.gsea-msigdb.org/gsea/msigdb/human/geneset/GOBP_SECRETION.html	1.45482	0	0.170815
GOBP_SARCOPLASMIC_RETICULUM_CALCIUM_ION_TRANSPORT	http://www.gsea-msigdb.org/gsea/msigdb/human/geneset/GOBP_SARCOPLASMIC_RETICULUM_CALCIUM_ION_TRANSPORT.html	1.45475	0.0548628	0.170384
GOBP_CHEMICAL_HOMEOSTASIS	http://www.gsea-msigdb.org/gsea/msigdb/human/geneset/GOBP_CHEMICAL_HOMEOSTASIS.html	1.45463	0	0.170047
GOBP_REGULATION_OF_MONOOXYGENASE_ACTIVITY	http://www.gsea-msigdb.org/gsea/msigdb/human/geneset/GOBP_REGULATION_OF_MONOOXYGENASE_ACTIVITY.html	1.45401	0.0587515	0.170375
GOBP_NEGATIVE_REGULATION_OF_RNA_CATABOLIC_PROCESS	http://www.gsea-msigdb.org/gsea/msigdb/human/geneset/GOBP_NEGATIVE_REGULATION_OF_RNA_CATABOLIC_PROCESS.html	1.45343	0.0511905	0.170629
GOBP_POSITIVE_REGULATION_OF_NEUROGENESIS	http://www.gsea-msigdb.org/gsea/msigdb/human/geneset/GOBP_POSITIVE_REGULATION_OF_NEUROGENESIS.html	1.45308	0.0224359	0.17058
GOBP_CELLULAR_TRANSITION_METAL_ION_HOMEOSTASIS	http://www.gsea-msigdb.org/gsea/msigdb/human/geneset/GOBP_CELLULAR_TRANSITION_METAL_ION_HOMEOSTASIS.html	1.45029	0.0353478	0.173858
GOBP_RAC_PROTEIN_SIGNAL_TRANSDUCTION	http://www.gsea-msigdb.org/gsea/msigdb/human/geneset/GOBP_RAC_PROTEIN_SIGNAL_TRANSDUCTION.html	1.44921	0.0400485	0.174829
GOBP_REGULATION_OF_MITOCHONDRIAL_OUTER_MEMBRANE_PERMEABILIZATION_INVOLVED_IN_APOPTOTIC_SIGNALING_PATHWAY	http://www.gsea-msigdb.org/gsea/msigdb/human/geneset/GOBP_REGULATION_OF_MITOCHONDRIAL_OUTER_MEMBRANE_PERMEABILIZATION_INVOLVED_IN_APOPTOTIC_SIGNALING_PATHWAY.html	1.44831	0.0608365	0.175489
GOBP_POSITIVE_REGULATION_OF_MITOCHONDRIAL_OUTER_MEMBRANE_PERMEABILIZATION_INVOLVED_IN_APOPTOTIC_SIGNALING_PATHWAY	http://www.gsea-msigdb.org/gsea/msigdb/human/geneset/GOBP_POSITIVE_REGULATION_OF_MITOCHONDRIAL_OUTER_MEMBRANE_PERMEABILIZATION_INVOLVED_IN_APOPTOTIC_SIGNALING_PATHWAY.html	1.44793	0.0544304	0.175583
GOBP_POSITIVE_REGULATION_OF_INTRINSIC_APOPTOTIC_SIGNALING_PATHWAY	http://www.gsea-msigdb.org/gsea/msigdb/human/geneset/GOBP_POSITIVE_REGULATION_OF_INTRINSIC_APOPTOTIC_SIGNALING_PATHWAY.html	1.4473	0.0604265	0.175903
GOBP_VIRION_ASSEMBLY	http://www.gsea-msigdb.org/gsea/msigdb/human/geneset/GOBP_VIRION_ASSEMBLY.html	1.44568	0.0636475	0.177631
GOBP_REGULATION_OF_EXTENT_OF_CELL_GROWTH	http://www.gsea-msigdb.org/gsea/msigdb/human/geneset/GOBP_REGULATION_OF_EXTENT_OF_CELL_GROWTH.html	1.44558	0.0400891	0.177249
GOBP_NEGATIVE_REGULATION_OF_AXON_EXTENSION	http://www.gsea-msigdb.org/gsea/msigdb/human/geneset/GOBP_NEGATIVE_REGULATION_OF_AXON_EXTENSION.html	1.4454	0.0475594	0.176989
GOBP_REGULATION_OF_UBIQUITIN_DEPENDENT_PROTEIN_CATABOLIC_PROCESS	http://www.gsea-msigdb.org/gsea/msigdb/human/geneset/GOBP_REGULATION_OF_UBIQUITIN_DEPENDENT_PROTEIN_CATABOLIC_PROCESS.html	1.44512	0.0236052	0.176857
GOBP_CENTRAL_NERVOUS_SYSTEM_NEURON_AXONOGENESIS	http://www.gsea-msigdb.org/gsea/msigdb/human/geneset/GOBP_CENTRAL_NERVOUS_SYSTEM_NEURON_AXONOGENESIS.html	1.44467	0.0512195	0.177061
GOBP_REGULATION_OF_DENDRITE_DEVELOPMENT	http://www.gsea-msigdb.org/gsea/msigdb/human/geneset/GOBP_REGULATION_OF_DENDRITE_DEVELOPMENT.html	1.44391	0.0393701	0.177678
GOBP_REGULATION_OF_SPINDLE_ORGANIZATION	http://www.gsea-msigdb.org/gsea/msigdb/human/geneset/GOBP_REGULATION_OF_SPINDLE_ORGANIZATION.html	1.4418	0.0542636	0.180163
GOBP_MITOCHONDRIAL_TRANSLATION	http://www.gsea-msigdb.org/gsea/msigdb/human/geneset/GOBP_MITOCHONDRIAL_TRANSLATION.html	1.43954	0.0434783	0.183064
GOBP_FC_RECEPTOR_SIGNALING_PATHWAY	http://www.gsea-msigdb.org/gsea/msigdb/human/geneset/GOBP_FC_RECEPTOR_SIGNALING_PATHWAY.html	1.43919	0.0202128	0.183011
GOBP_MITOCHONDRION_ORGANIZATION	http://www.gsea-msigdb.org/gsea/msigdb/human/geneset/GOBP_MITOCHONDRION_ORGANIZATION.html	1.43814	0.00708502	0.183951
GOBP_NUCLEOBASE_CONTAINING_COMPOUND_TRANSPORT	http://www.gsea-msigdb.org/gsea/msigdb/human/geneset/GOBP_NUCLEOBASE_CONTAINING_COMPOUND_TRANSPORT.html	1.43792	0.0105152	0.183762
GOBP_RESPONSE_TO_INORGANIC_SUBSTANCE	http://www.gsea-msigdb.org/gsea/msigdb/human/geneset/GOBP_RESPONSE_TO_INORGANIC_SUBSTANCE.html	1.43656	0.00509165	0.185333
GOBP_NEGATIVE_REGULATION_OF_PROTEIN_CONTAINING_COMPLEX_ASSEMBLY	http://www.gsea-msigdb.org/gsea/msigdb/human/geneset/GOBP_NEGATIVE_REGULATION_OF_PROTEIN_CONTAINING_COMPLEX_ASSEMBLY.html	1.43651	0.0285088	0.184875
GOBP_REGULATION_OF_CALCIUM_ION_TRANSPORT_INTO_CYTOSOL	http://www.gsea-msigdb.org/gsea/msigdb/human/geneset/GOBP_REGULATION_OF_CALCIUM_ION_TRANSPORT_INTO_CYTOSOL.html	1.43357	0.0467066	0.188513
GOBP_NEGATIVE_REGULATION_OF_MOLECULAR_FUNCTION	http://www.gsea-msigdb.org/gsea/msigdb/human/geneset/GOBP_NEGATIVE_REGULATION_OF_MOLECULAR_FUNCTION.html	1.43346	0	0.188166
GOBP_NEGATIVE_REGULATION_OF_CELL_PROJECTION_ORGANIZATION	http://www.gsea-msigdb.org/gsea/msigdb/human/geneset/GOBP_NEGATIVE_REGULATION_OF_CELL_PROJECTION_ORGANIZATION.html	1.43338	0.0281996	0.187752
GOBP_MRNA_EXPORT_FROM_NUCLEUS	http://www.gsea-msigdb.org/gsea/msigdb/human/geneset/GOBP_MRNA_EXPORT_FROM_NUCLEUS.html	1.43307	0.0349887	0.187704
GOBP_POSITIVE_REGULATION_OF_ION_TRANSPORT	http://www.gsea-msigdb.org/gsea/msigdb/human/geneset/GOBP_POSITIVE_REGULATION_OF_ION_TRANSPORT.html	1.43282	0.00606061	0.187529
GOBP_TRANSCRIPTION_COUPLED_NUCLEOTIDE_EXCISION_REPAIR	http://www.gsea-msigdb.org/gsea/msigdb/human/geneset/GOBP_TRANSCRIPTION_COUPLED_NUCLEOTIDE_EXCISION_REPAIR.html	1.43224	0.051497	0.187903
GOBP_POSITIVE_REGULATION_OF_AXON_EXTENSION	http://www.gsea-msigdb.org/gsea/msigdb/human/geneset/GOBP_POSITIVE_REGULATION_OF_AXON_EXTENSION.html	1.43011	0.0704739	0.190682
GOBP_INORGANIC_ANION_TRANSMEMBRANE_TRANSPORT	http://www.gsea-msigdb.org/gsea/msigdb/human/geneset/GOBP_INORGANIC_ANION_TRANSMEMBRANE_TRANSPORT.html	1.42949	0.0589651	0.191079
GOBP_PEROXISOME_ORGANIZATION	http://www.gsea-msigdb.org/gsea/msigdb/human/geneset/GOBP_PEROXISOME_ORGANIZATION.html	1.42866	0.0647059	0.191853
GOBP_REGULATION_OF_CYTOSKELETON_ORGANIZATION	http://www.gsea-msigdb.org/gsea/msigdb/human/geneset/GOBP_REGULATION_OF_CYTOSKELETON_ORGANIZATION.html	1.42785	0.00704935	0.192587
GOBP_POSITIVE_REGULATION_OF_LIPID_TRANSPORT	http://www.gsea-msigdb.org/gsea/msigdb/human/geneset/GOBP_POSITIVE_REGULATION_OF_LIPID_TRANSPORT.html	1.42587	0.0528255	0.195139
GOBP_ENDOPLASMIC_RETICULUM_ORGANIZATION	http://www.gsea-msigdb.org/gsea/msigdb/human/geneset/GOBP_ENDOPLASMIC_RETICULUM_ORGANIZATION.html	1.42483	0.0544379	0.19623
GOBP_IMMUNE_RESPONSE_REGULATING_SIGNALING_PATHWAY	http://www.gsea-msigdb.org/gsea/msigdb/human/geneset/GOBP_IMMUNE_RESPONSE_REGULATING_SIGNALING_PATHWAY.html	1.42383	0.0134995	0.197173
GOBP_SPLICEOSOMAL_COMPLEX_ASSEMBLY	http://www.gsea-msigdb.org/gsea/msigdb/human/geneset/GOBP_SPLICEOSOMAL_COMPLEX_ASSEMBLY.html	1.42336	0.0748218	0.197456
GOBP_REGULATION_OF_TRANSLATIONAL_INITIATION	http://www.gsea-msigdb.org/gsea/msigdb/human/geneset/GOBP_REGULATION_OF_TRANSLATIONAL_INITIATION.html	1.42063	0.0478905	0.201003
GOBP_NEGATIVE_REGULATION_OF_MICROTUBULE_POLYMERIZATION_OR_DEPOLYMERIZATION	http://www.gsea-msigdb.org/gsea/msigdb/human/geneset/GOBP_NEGATIVE_REGULATION_OF_MICROTUBULE_POLYMERIZATION_OR_DEPOLYMERIZATION.html	1.42003	0.0702836	0.201389
GOBP_REGULATION_OF_HEART_CONTRACTION	http://www.gsea-msigdb.org/gsea/msigdb/human/geneset/GOBP_REGULATION_OF_HEART_CONTRACTION.html	1.41932	0.0359086	0.201958
GOBP_CARDIAC_MUSCLE_CELL_CONTRACTION	http://www.gsea-msigdb.org/gsea/msigdb/human/geneset/GOBP_CARDIAC_MUSCLE_CELL_CONTRACTION.html	1.41924	0.0665083	0.201549
GOBP_DETECTION_OF_STIMULUS	http://www.gsea-msigdb.org/gsea/msigdb/human/geneset/GOBP_DETECTION_OF_STIMULUS.html	1.41704	0.0352035	0.204337
GOBP_NEGATIVE_REGULATION_OF_PROTEIN_BINDING	http://www.gsea-msigdb.org/gsea/msigdb/human/geneset/GOBP_NEGATIVE_REGULATION_OF_PROTEIN_BINDING.html	1.41599	0.0596659	0.205518
GOBP_RESPONSE_TO_PEPTIDE	http://www.gsea-msigdb.org/gsea/msigdb/human/geneset/GOBP_RESPONSE_TO_PEPTIDE.html	1.41502	0.00506073	0.206505
GOBP_AXO_DENDRITIC_TRANSPORT	http://www.gsea-msigdb.org/gsea/msigdb/human/geneset/GOBP_AXO_DENDRITIC_TRANSPORT.html	1.41454	0.0484234	0.206698
GOBP_ORGANOPHOSPHATE_CATABOLIC_PROCESS	http://www.gsea-msigdb.org/gsea/msigdb/human/geneset/GOBP_ORGANOPHOSPHATE_CATABOLIC_PROCESS.html	1.41392	0.0482759	0.2072
GOBP_MODIFICATION_DEPENDENT_MACROMOLECULE_CATABOLIC_PROCESS	http://www.gsea-msigdb.org/gsea/msigdb/human/geneset/GOBP_MODIFICATION_DEPENDENT_MACROMOLECULE_CATABOLIC_PROCESS.html	1.41382	0	0.206825
GOBP_REGULATION_OF_ACTIN_FILAMENT_BASED_PROCESS	http://www.gsea-msigdb.org/gsea/msigdb/human/geneset/GOBP_REGULATION_OF_ACTIN_FILAMENT_BASED_PROCESS.html	1.41365	0.0122699	0.206556
GOBP_POSITIVE_REGULATION_OF_DENDRITE_MORPHOGENESIS	http://www.gsea-msigdb.org/gsea/msigdb/human/geneset/GOBP_POSITIVE_REGULATION_OF_DENDRITE_MORPHOGENESIS.html	1.41325	0.0659341	0.206628
GOBP_NEGATIVE_REGULATION_OF_BINDING	http://www.gsea-msigdb.org/gsea/msigdb/human/geneset/GOBP_NEGATIVE_REGULATION_OF_BINDING.html	1.41115	0.0465116	0.209427
GOBP_INTERLEUKIN_1_MEDIATED_SIGNALING_PATHWAY	http://www.gsea-msigdb.org/gsea/msigdb/human/geneset/GOBP_INTERLEUKIN_1_MEDIATED_SIGNALING_PATHWAY.html	1.4108	0.057243	0.209459
GOBP_RNA_DEPENDENT_DNA_BIOSYNTHETIC_PROCESS	http://www.gsea-msigdb.org/gsea/msigdb/human/geneset/GOBP_RNA_DEPENDENT_DNA_BIOSYNTHETIC_PROCESS.html	1.40999	0.0477897	0.210167
GOBP_AXON_DEVELOPMENT	http://www.gsea-msigdb.org/gsea/msigdb/human/geneset/GOBP_AXON_DEVELOPMENT.html	1.40917	0.0060423	0.210991
GOBP_VESICLE_TARGETING	http://www.gsea-msigdb.org/gsea/msigdb/human/geneset/GOBP_VESICLE_TARGETING.html	1.4087	0.0456621	0.211247
GOBP_REGULATION_OF_PEPTIDASE_ACTIVITY	http://www.gsea-msigdb.org/gsea/msigdb/human/geneset/GOBP_REGULATION_OF_PEPTIDASE_ACTIVITY.html	1.40862	0.015544	0.210823
GOBP_POSITIVE_REGULATION_OF_NF_KAPPAB_TRANSCRIPTION_FACTOR_ACTIVITY	http://www.gsea-msigdb.org/gsea/msigdb/human/geneset/GOBP_POSITIVE_REGULATION_OF_NF_KAPPAB_TRANSCRIPTION_FACTOR_ACTIVITY.html	1.40671	0.0432372	0.213366
GOBP_TELOMERE_MAINTENANCE_VIA_TELOMERE_LENGTHENING	http://www.gsea-msigdb.org/gsea/msigdb/human/geneset/GOBP_TELOMERE_MAINTENANCE_VIA_TELOMERE_LENGTHENING.html	1.40603	0.0675204	0.213802
GOBP_ACTIN_FILAMENT_ORGANIZATION	http://www.gsea-msigdb.org/gsea/msigdb/human/geneset/GOBP_ACTIN_FILAMENT_ORGANIZATION.html	1.40602	0.0111902	0.213272
GOBP_PROTEIN_LOCALIZATION_TO_CHROMOSOME_TELOMERIC_REGION	http://www.gsea-msigdb.org/gsea/msigdb/human/geneset/GOBP_PROTEIN_LOCALIZATION_TO_CHROMOSOME_TELOMERIC_REGION.html	1.40561	0.0813954	0.213413
GOBP_REGULATION_OF_AUTOPHAGY_OF_MITOCHONDRION	http://www.gsea-msigdb.org/gsea/msigdb/human/geneset/GOBP_REGULATION_OF_AUTOPHAGY_OF_MITOCHONDRION.html	1.40526	0.0811153	0.21337
GOBP_NEGATIVE_REGULATION_OF_KINASE_ACTIVITY	http://www.gsea-msigdb.org/gsea/msigdb/human/geneset/GOBP_NEGATIVE_REGULATION_OF_KINASE_ACTIVITY.html	1.40447	0.0189873	0.214145
GOBP_G_PROTEIN_COUPLED_RECEPTOR_SIGNALING_PATHWAY	http://www.gsea-msigdb.org/gsea/msigdb/human/geneset/GOBP_G_PROTEIN_COUPLED_RECEPTOR_SIGNALING_PATHWAY.html	1.40156	0.00915565	0.2185
GOBP_PROTEIN_KINASE_A_SIGNALING	http://www.gsea-msigdb.org/gsea/msigdb/human/geneset/GOBP_PROTEIN_KINASE_A_SIGNALING.html	1.40121	0.0766283	0.218554
GOBP_CYTOSOLIC_TRANSPORT	http://www.gsea-msigdb.org/gsea/msigdb/human/geneset/GOBP_CYTOSOLIC_TRANSPORT.html	1.40039	0.0385439	0.219481
GOBP_REGULATION_OF_MITOCHONDRIAL_MEMBRANE_PERMEABILITY	http://www.gsea-msigdb.org/gsea/msigdb/human/geneset/GOBP_REGULATION_OF_MITOCHONDRIAL_MEMBRANE_PERMEABILITY.html	1.40032	0.0694118	0.219016
GOBP_NEURON_PROJECTION_GUIDANCE	http://www.gsea-msigdb.org/gsea/msigdb/human/geneset/GOBP_NEURON_PROJECTION_GUIDANCE.html	1.39838	0.022869	0.221627
GOBP_CELLULAR_RESPONSE_TO_PEPTIDE	http://www.gsea-msigdb.org/gsea/msigdb/human/geneset/GOBP_CELLULAR_RESPONSE_TO_PEPTIDE.html	1.39834	0.0163265	0.221112
GOBP_MAINTENANCE_OF_BLOOD_BRAIN_BARRIER	http://www.gsea-msigdb.org/gsea/msigdb/human/geneset/GOBP_MAINTENANCE_OF_BLOOD_BRAIN_BARRIER.html	1.39787	0.0854592	0.221383
GOBP_NEGATIVE_REGULATION_OF_HYDROLASE_ACTIVITY	http://www.gsea-msigdb.org/gsea/msigdb/human/geneset/GOBP_NEGATIVE_REGULATION_OF_HYDROLASE_ACTIVITY.html	1.39777	0.0176532	0.221004
GOBP_CELLULAR_RESPONSE_TO_AMYLOID_BETA	http://www.gsea-msigdb.org/gsea/msigdb/human/geneset/GOBP_CELLULAR_RESPONSE_TO_AMYLOID_BETA.html	1.3965	0.085	0.222413
GOBP_TELOMERE_ORGANIZATION	http://www.gsea-msigdb.org/gsea/msigdb/human/geneset/GOBP_TELOMERE_ORGANIZATION.html	1.3949	0.0543237	0.224525
GOBP_ARP2_3_COMPLEX_MEDIATED_ACTIN_NUCLEATION	http://www.gsea-msigdb.org/gsea/msigdb/human/geneset/GOBP_ARP2_3_COMPLEX_MEDIATED_ACTIN_NUCLEATION.html	1.39478	0.0833333	0.224165
GOBP_LIMBIC_SYSTEM_DEVELOPMENT	http://www.gsea-msigdb.org/gsea/msigdb/human/geneset/GOBP_LIMBIC_SYSTEM_DEVELOPMENT.html	1.39425	0.0668258	0.224488
GOBP_PHOSPHOLIPID_CATABOLIC_PROCESS	http://www.gsea-msigdb.org/gsea/msigdb/human/geneset/GOBP_PHOSPHOLIPID_CATABOLIC_PROCESS.html	1.39382	0.089172	0.224623
GOBP_NEGATIVE_REGULATION_OF_PROTEASOMAL_PROTEIN_CATABOLIC_PROCESS	http://www.gsea-msigdb.org/gsea/msigdb/human/geneset/GOBP_NEGATIVE_REGULATION_OF_PROTEASOMAL_PROTEIN_CATABOLIC_PROCESS.html	1.39358	0.0790754	0.224515
GOBP_REGULATION_OF_BLOOD_CIRCULATION	http://www.gsea-msigdb.org/gsea/msigdb/human/geneset/GOBP_REGULATION_OF_BLOOD_CIRCULATION.html	1.3934	0.0364807	0.224295
GOBP_ACTIN_FILAMENT_DEPOLYMERIZATION	http://www.gsea-msigdb.org/gsea/msigdb/human/geneset/GOBP_ACTIN_FILAMENT_DEPOLYMERIZATION.html	1.39286	0.070197	0.224696
GOBP_UBIQUITIN_DEPENDENT_ERAD_PATHWAY	http://www.gsea-msigdb.org/gsea/msigdb/human/geneset/GOBP_UBIQUITIN_DEPENDENT_ERAD_PATHWAY.html	1.39229	0.0684932	0.225135
GOBP_AXON_EXTENSION	http://www.gsea-msigdb.org/gsea/msigdb/human/geneset/GOBP_AXON_EXTENSION.html	1.39211	0.0434783	0.224855
GOBP_CELLULAR_PROTEIN_CATABOLIC_PROCESS	http://www.gsea-msigdb.org/gsea/msigdb/human/geneset/GOBP_CELLULAR_PROTEIN_CATABOLIC_PROCESS.html	1.39203	0.00200401	0.224423
GOBP_POSITIVE_REGULATION_OF_TRANSLATION	http://www.gsea-msigdb.org/gsea/msigdb/human/geneset/GOBP_POSITIVE_REGULATION_OF_TRANSLATION.html	1.39148	0.0584344	0.224893
GOBP_LONG_TERM_MEMORY	http://www.gsea-msigdb.org/gsea/msigdb/human/geneset/GOBP_LONG_TERM_MEMORY.html	1.39125	0.100254	0.224708
GOBP_GOLGI_VESICLE_TRANSPORT	http://www.gsea-msigdb.org/gsea/msigdb/human/geneset/GOBP_GOLGI_VESICLE_TRANSPORT.html	1.38937	0.0132248	0.227477
GOBP_PEROXISOMAL_TRANSPORT	http://www.gsea-msigdb.org/gsea/msigdb/human/geneset/GOBP_PEROXISOMAL_TRANSPORT.html	1.38903	0.0722022	0.227444
GOBP_PROTEIN_LOCALIZATION_TO_CHROMOSOME	http://www.gsea-msigdb.org/gsea/msigdb/human/geneset/GOBP_PROTEIN_LOCALIZATION_TO_CHROMOSOME.html	1.38816	0.068525	0.228399
GOBP_POSTREPLICATION_REPAIR	http://www.gsea-msigdb.org/gsea/msigdb/human/geneset/GOBP_POSTREPLICATION_REPAIR.html	1.38778	0.0752688	0.228508
GOBP_CELLULAR_RESPONSE_TO_CARBOHYDRATE_STIMULUS	http://www.gsea-msigdb.org/gsea/msigdb/human/geneset/GOBP_CELLULAR_RESPONSE_TO_CARBOHYDRATE_STIMULUS.html	1.38738	0.0619369	0.228651
GOBP_ESTABLISHMENT_OF_ORGANELLE_LOCALIZATION	http://www.gsea-msigdb.org/gsea/msigdb/human/geneset/GOBP_ESTABLISHMENT_OF_ORGANELLE_LOCALIZATION.html	1.38717	0.0111902	0.22846
GOBP_HIPPOCAMPUS_DEVELOPMENT	http://www.gsea-msigdb.org/gsea/msigdb/human/geneset/GOBP_HIPPOCAMPUS_DEVELOPMENT.html	1.38683	0.0728155	0.228462
GOBP_NEGATIVE_REGULATION_OF_VIRAL_PROCESS	http://www.gsea-msigdb.org/gsea/msigdb/human/geneset/GOBP_NEGATIVE_REGULATION_OF_VIRAL_PROCESS.html	1.38625	0.0913642	0.228922
GOBP_REGULATION_OF_MUSCLE_CONTRACTION	http://www.gsea-msigdb.org/gsea/msigdb/human/geneset/GOBP_REGULATION_OF_MUSCLE_CONTRACTION.html	1.3857	0.0655367	0.229332
GOBP_INTRINSIC_APOPTOTIC_SIGNALING_PATHWAY	http://www.gsea-msigdb.org/gsea/msigdb/human/geneset/GOBP_INTRINSIC_APOPTOTIC_SIGNALING_PATHWAY.html	1.38558	0.0262881	0.228992
GOBP_VACUOLAR_TRANSPORT	http://www.gsea-msigdb.org/gsea/msigdb/human/geneset/GOBP_VACUOLAR_TRANSPORT.html	1.38503	0.0365985	0.229405
GOBP_GLYCEROLIPID_CATABOLIC_PROCESS	http://www.gsea-msigdb.org/gsea/msigdb/human/geneset/GOBP_GLYCEROLIPID_CATABOLIC_PROCESS.html	1.38486	0.0916977	0.229169
GOBP_POSITIVE_REGULATION_OF_CYSTEINE_TYPE_ENDOPEPTIDASE_ACTIVITY	http://www.gsea-msigdb.org/gsea/msigdb/human/geneset/GOBP_POSITIVE_REGULATION_OF_CYSTEINE_TYPE_ENDOPEPTIDASE_ACTIVITY.html	1.38427	0.0731429	0.229652
GOBP_NEURON_DEVELOPMENT	http://www.gsea-msigdb.org/gsea/msigdb/human/geneset/GOBP_NEURON_DEVELOPMENT.html	1.38408	0.001001	0.229414
GOBP_REGULATION_OF_NEURON_PROJECTION_DEVELOPMENT	http://www.gsea-msigdb.org/gsea/msigdb/human/geneset/GOBP_REGULATION_OF_NEURON_PROJECTION_DEVELOPMENT.html	1.38354	0.0121704	0.229858
GOBP_REGULATION_OF_PROTEIN_CONTAINING_COMPLEX_ASSEMBLY	http://www.gsea-msigdb.org/gsea/msigdb/human/geneset/GOBP_REGULATION_OF_PROTEIN_CONTAINING_COMPLEX_ASSEMBLY.html	1.38319	0.0101729	0.229891
GOBP_HETEROPHILIC_CELL_CELL_ADHESION_VIA_PLASMA_MEMBRANE_CELL_ADHESION_MOLECULES	http://www.gsea-msigdb.org/gsea/msigdb/human/geneset/GOBP_HETEROPHILIC_CELL_CELL_ADHESION_VIA_PLASMA_MEMBRANE_CELL_ADHESION_MOLECULES.html	1.38262	0.0970626	0.230379
GOBP_CELL_JUNCTION_ASSEMBLY	http://www.gsea-msigdb.org/gsea/msigdb/human/geneset/GOBP_CELL_JUNCTION_ASSEMBLY.html	1.38152	0.0163099	0.231803
GOBP_MITOTIC_SPINDLE_ORGANIZATION	http://www.gsea-msigdb.org/gsea/msigdb/human/geneset/GOBP_MITOTIC_SPINDLE_ORGANIZATION.html	1.3814	0.0457143	0.231477
GOBP_MICROTUBULE_POLYMERIZATION_OR_DEPOLYMERIZATION	http://www.gsea-msigdb.org/gsea/msigdb/human/geneset/GOBP_MICROTUBULE_POLYMERIZATION_OR_DEPOLYMERIZATION.html	1.38058	0.057971	0.232351
GOBP_MYELOID_LEUKOCYTE_ACTIVATION	http://www.gsea-msigdb.org/gsea/msigdb/human/geneset/GOBP_MYELOID_LEUKOCYTE_ACTIVATION.html	1.37944	0.00507614	0.233841
GOBP_INSULIN_SECRETION_INVOLVED_IN_CELLULAR_RESPONSE_TO_GLUCOSE_STIMULUS	http://www.gsea-msigdb.org/gsea/msigdb/human/geneset/GOBP_INSULIN_SECRETION_INVOLVED_IN_CELLULAR_RESPONSE_TO_GLUCOSE_STIMULUS.html	1.37922	0.0913642	0.233626
GOBP_DEVELOPMENTAL_MATURATION	http://www.gsea-msigdb.org/gsea/msigdb/human/geneset/GOBP_DEVELOPMENTAL_MATURATION.html	1.37855	0.0432432	0.234241
GOBP_POSITIVE_REGULATION_OF_MITOCHONDRION_ORGANIZATION	http://www.gsea-msigdb.org/gsea/msigdb/human/geneset/GOBP_POSITIVE_REGULATION_OF_MITOCHONDRION_ORGANIZATION.html	1.37839	0.0780712	0.234056
GOBP_VESICLE_ORGANIZATION	http://www.gsea-msigdb.org/gsea/msigdb/human/geneset/GOBP_VESICLE_ORGANIZATION.html	1.37798	0.0217166	0.234244
GOBP_CHLORIDE_TRANSPORT	http://www.gsea-msigdb.org/gsea/msigdb/human/geneset/GOBP_CHLORIDE_TRANSPORT.html	1.37733	0.0809816	0.234842
GOBP_REGULATION_OF_NEUROGENESIS	http://www.gsea-msigdb.org/gsea/msigdb/human/geneset/GOBP_REGULATION_OF_NEUROGENESIS.html	1.3738	0.0297436	0.240376
GOBP_POSITIVE_REGULATION_OF_TELOMERE_MAINTENANCE	http://www.gsea-msigdb.org/gsea/msigdb/human/geneset/GOBP_POSITIVE_REGULATION_OF_TELOMERE_MAINTENANCE.html	1.37375	0.0876351	0.239941
GOBP_REGULATION_OF_NERVOUS_SYSTEM_DEVELOPMENT	http://www.gsea-msigdb.org/gsea/msigdb/human/geneset/GOBP_REGULATION_OF_NERVOUS_SYSTEM_DEVELOPMENT.html	1.37038	0.017418	0.245399
GOBP_REGULATION_OF_MEMBRANE_PERMEABILITY	http://www.gsea-msigdb.org/gsea/msigdb/human/geneset/GOBP_REGULATION_OF_MEMBRANE_PERMEABILITY.html	1.37036	0.0890173	0.244873
GOBP_NEGATIVE_REGULATION_OF_DEPHOSPHORYLATION	http://www.gsea-msigdb.org/gsea/msigdb/human/geneset/GOBP_NEGATIVE_REGULATION_OF_DEPHOSPHORYLATION.html	1.36938	0.0600462	0.246001
GOBP_GENERATION_OF_PRECURSOR_METABOLITES_AND_ENERGY	http://www.gsea-msigdb.org/gsea/msigdb/human/geneset/GOBP_GENERATION_OF_PRECURSOR_METABOLITES_AND_ENERGY.html	1.36906	0.0203874	0.246025
GOBP_MITOCHONDRIAL_TRANSLATIONAL_TERMINATION	http://www.gsea-msigdb.org/gsea/msigdb/human/geneset/GOBP_MITOCHONDRIAL_TRANSLATIONAL_TERMINATION.html	1.36886	0.0985916	0.245847
GOBP_SINGLE_FERTILIZATION	http://www.gsea-msigdb.org/gsea/msigdb/human/geneset/GOBP_SINGLE_FERTILIZATION.html	1.36634	0.0734597	0.249902

## Sheet: CytoTrace_NCInegative_pathways
NAME	URL	NES	NOM p-val	FDR q-val
GOBP_REGULATION_OF_NEUROTRANSMITTER_RECEPTOR_ACTIVITY	http://www.gsea-msigdb.org/gsea/msigdb/human/geneset/GOBP_REGULATION_OF_NEUROTRANSMITTER_RECEPTOR_ACTIVITY.html	2.77428	0	0
GOBP_REGULATION_OF_NMDA_RECEPTOR_ACTIVITY	http://www.gsea-msigdb.org/gsea/msigdb/human/geneset/GOBP_REGULATION_OF_NMDA_RECEPTOR_ACTIVITY.html	2.63642	0	0
GOBP_REGULATION_OF_CATION_CHANNEL_ACTIVITY	http://www.gsea-msigdb.org/gsea/msigdb/human/geneset/GOBP_REGULATION_OF_CATION_CHANNEL_ACTIVITY.html	2.6158	0	0
GOBP_ACTION_POTENTIAL	http://www.gsea-msigdb.org/gsea/msigdb/human/geneset/GOBP_ACTION_POTENTIAL.html	2.59506	0	0
GOBP_REGULATION_OF_SYNAPTIC_PLASTICITY	http://www.gsea-msigdb.org/gsea/msigdb/human/geneset/GOBP_REGULATION_OF_SYNAPTIC_PLASTICITY.html	2.558	0	0
GOBP_GLUTAMATE_RECEPTOR_SIGNALING_PATHWAY	http://www.gsea-msigdb.org/gsea/msigdb/human/geneset/GOBP_GLUTAMATE_RECEPTOR_SIGNALING_PATHWAY.html	2.5495	0	0
GOBP_SYNAPSE_ASSEMBLY	http://www.gsea-msigdb.org/gsea/msigdb/human/geneset/GOBP_SYNAPSE_ASSEMBLY.html	2.53976	0	0
GOBP_REGULATION_OF_POSTSYNAPTIC_MEMBRANE_POTENTIAL	http://www.gsea-msigdb.org/gsea/msigdb/human/geneset/GOBP_REGULATION_OF_POSTSYNAPTIC_MEMBRANE_POTENTIAL.html	2.51245	0	0
GOBP_REGULATION_OF_SYNAPSE_ASSEMBLY	http://www.gsea-msigdb.org/gsea/msigdb/human/geneset/GOBP_REGULATION_OF_SYNAPSE_ASSEMBLY.html	2.50625	0	0
GOBP_REGULATION_OF_TRANS_SYNAPTIC_SIGNALING	http://www.gsea-msigdb.org/gsea/msigdb/human/geneset/GOBP_REGULATION_OF_TRANS_SYNAPTIC_SIGNALING.html	2.50469	0	0
GOBP_CARDIAC_MUSCLE_CELL_ACTION_POTENTIAL	http://www.gsea-msigdb.org/gsea/msigdb/human/geneset/GOBP_CARDIAC_MUSCLE_CELL_ACTION_POTENTIAL.html	2.50248	0	0
GOBP_REGULATION_OF_MEMBRANE_POTENTIAL	http://www.gsea-msigdb.org/gsea/msigdb/human/geneset/GOBP_REGULATION_OF_MEMBRANE_POTENTIAL.html	2.5002	0	0
GOBP_SYNAPTIC_SIGNALING	http://www.gsea-msigdb.org/gsea/msigdb/human/geneset/GOBP_SYNAPTIC_SIGNALING.html	2.49784	0	0
GOBP_PROTEIN_LOCALIZATION_TO_SYNAPSE	http://www.gsea-msigdb.org/gsea/msigdb/human/geneset/GOBP_PROTEIN_LOCALIZATION_TO_SYNAPSE.html	2.41462	0	0
GOBP_REGULATION_OF_SIGNALING_RECEPTOR_ACTIVITY	http://www.gsea-msigdb.org/gsea/msigdb/human/geneset/GOBP_REGULATION_OF_SIGNALING_RECEPTOR_ACTIVITY.html	2.38999	0	0
GOBP_IONOTROPIC_GLUTAMATE_RECEPTOR_SIGNALING_PATHWAY	http://www.gsea-msigdb.org/gsea/msigdb/human/geneset/GOBP_IONOTROPIC_GLUTAMATE_RECEPTOR_SIGNALING_PATHWAY.html	2.37142	0	0
GOBP_NEUROTRANSMITTER_SECRETION	http://www.gsea-msigdb.org/gsea/msigdb/human/geneset/GOBP_NEUROTRANSMITTER_SECRETION.html	2.36305	0	0
GOBP_POSITIVE_REGULATION_OF_SYNAPSE_ASSEMBLY	http://www.gsea-msigdb.org/gsea/msigdb/human/geneset/GOBP_POSITIVE_REGULATION_OF_SYNAPSE_ASSEMBLY.html	2.34613	0	0
GOBP_REGULATION_OF_NEUROTRANSMITTER_TRANSPORT	http://www.gsea-msigdb.org/gsea/msigdb/human/geneset/GOBP_REGULATION_OF_NEUROTRANSMITTER_TRANSPORT.html	2.33382	0	0
GOBP_CHEMICAL_SYNAPTIC_TRANSMISSION_POSTSYNAPTIC	http://www.gsea-msigdb.org/gsea/msigdb/human/geneset/GOBP_CHEMICAL_SYNAPTIC_TRANSMISSION_POSTSYNAPTIC.html	2.31927	0	0
GOBP_REGULATION_OF_NEURONAL_SYNAPTIC_PLASTICITY	http://www.gsea-msigdb.org/gsea/msigdb/human/geneset/GOBP_REGULATION_OF_NEURONAL_SYNAPTIC_PLASTICITY.html	2.31726	0	0
GOBP_TRANSMISSION_OF_NERVE_IMPULSE	http://www.gsea-msigdb.org/gsea/msigdb/human/geneset/GOBP_TRANSMISSION_OF_NERVE_IMPULSE.html	2.30665	0	0
GOBP_RECEPTOR_LOCALIZATION_TO_SYNAPSE	http://www.gsea-msigdb.org/gsea/msigdb/human/geneset/GOBP_RECEPTOR_LOCALIZATION_TO_SYNAPSE.html	2.29769	0	0
GOBP_SYNAPTIC_VESICLE_EXOCYTOSIS	http://www.gsea-msigdb.org/gsea/msigdb/human/geneset/GOBP_SYNAPTIC_VESICLE_EXOCYTOSIS.html	2.28726	0	0
GOBP_NEGATIVE_CHEMOTAXIS	http://www.gsea-msigdb.org/gsea/msigdb/human/geneset/GOBP_NEGATIVE_CHEMOTAXIS.html	2.28587	0	0
GOBP_PRESYNAPSE_ORGANIZATION	http://www.gsea-msigdb.org/gsea/msigdb/human/geneset/GOBP_PRESYNAPSE_ORGANIZATION.html	2.27659	0	0
GOBP_REGULATION_OF_CATION_TRANSMEMBRANE_TRANSPORT	http://www.gsea-msigdb.org/gsea/msigdb/human/geneset/GOBP_REGULATION_OF_CATION_TRANSMEMBRANE_TRANSPORT.html	2.25673	0	0
GOBP_REGULATION_OF_ACTION_POTENTIAL	http://www.gsea-msigdb.org/gsea/msigdb/human/geneset/GOBP_REGULATION_OF_ACTION_POTENTIAL.html	2.25598	0	0
GOBP_REGULATION_OF_TRANSPORTER_ACTIVITY	http://www.gsea-msigdb.org/gsea/msigdb/human/geneset/GOBP_REGULATION_OF_TRANSPORTER_ACTIVITY.html	2.24319	0	5.58038e-05
GOBP_POSITIVE_REGULATION_OF_CALCIUM_ION_TRANSPORT	http://www.gsea-msigdb.org/gsea/msigdb/human/geneset/GOBP_POSITIVE_REGULATION_OF_CALCIUM_ION_TRANSPORT.html	2.24114	0	5.39436e-05
GOBP_VESICLE_MEDIATED_TRANSPORT_IN_SYNAPSE	http://www.gsea-msigdb.org/gsea/msigdb/human/geneset/GOBP_VESICLE_MEDIATED_TRANSPORT_IN_SYNAPSE.html	2.24065	0	5.22035e-05
GOBP_CARDIAC_MUSCLE_CELL_ACTION_POTENTIAL_INVOLVED_IN_CONTRACTION	http://www.gsea-msigdb.org/gsea/msigdb/human/geneset/GOBP_CARDIAC_MUSCLE_CELL_ACTION_POTENTIAL_INVOLVED_IN_CONTRACTION.html	2.21552	0	7.57113e-05
GOBP_REGULATION_OF_SYNAPTIC_VESICLE_EXOCYTOSIS	http://www.gsea-msigdb.org/gsea/msigdb/human/geneset/GOBP_REGULATION_OF_SYNAPTIC_VESICLE_EXOCYTOSIS.html	2.19789	0	9.81779e-05
GOBP_REGULATION_OF_SYNAPTIC_TRANSMISSION_GLUTAMATERGIC	http://www.gsea-msigdb.org/gsea/msigdb/human/geneset/GOBP_REGULATION_OF_SYNAPTIC_TRANSMISSION_GLUTAMATERGIC.html	2.19388	0	9.52903e-05
GOBP_SYNAPTIC_TRANSMISSION_GLUTAMATERGIC	http://www.gsea-msigdb.org/gsea/msigdb/human/geneset/GOBP_SYNAPTIC_TRANSMISSION_GLUTAMATERGIC.html	2.192	0	9.25677e-05
GOBP_REGULATION_OF_SYNAPSE_STRUCTURE_OR_ACTIVITY	http://www.gsea-msigdb.org/gsea/msigdb/human/geneset/GOBP_REGULATION_OF_SYNAPSE_STRUCTURE_OR_ACTIVITY.html	2.1854	0	0.000112462
GOBP_SYNAPSE_ORGANIZATION	http://www.gsea-msigdb.org/gsea/msigdb/human/geneset/GOBP_SYNAPSE_ORGANIZATION.html	2.18252	0	0.000109422
GOBP_NEUROTRANSMITTER_TRANSPORT	http://www.gsea-msigdb.org/gsea/msigdb/human/geneset/GOBP_NEUROTRANSMITTER_TRANSPORT.html	2.17971	0	0.000106543
GOBP_REGULATION_OF_EXOCYTOSIS	http://www.gsea-msigdb.org/gsea/msigdb/human/geneset/GOBP_REGULATION_OF_EXOCYTOSIS.html	2.17772	0	0.000124498
GOBP_NEURON_PROJECTION_EXTENSION_INVOLVED_IN_NEURON_PROJECTION_GUIDANCE	http://www.gsea-msigdb.org/gsea/msigdb/human/geneset/GOBP_NEURON_PROJECTION_EXTENSION_INVOLVED_IN_NEURON_PROJECTION_GUIDANCE.html	2.16407	0	0.000181949
GOBP_MULTICELLULAR_ORGANISMAL_SIGNALING	http://www.gsea-msigdb.org/gsea/msigdb/human/geneset/GOBP_MULTICELLULAR_ORGANISMAL_SIGNALING.html	2.16278	0	0.000197276
GOBP_CALCIUM_ION_REGULATED_EXOCYTOSIS	http://www.gsea-msigdb.org/gsea/msigdb/human/geneset/GOBP_CALCIUM_ION_REGULATED_EXOCYTOSIS.html	2.15546	0	0.00021176
GOBP_SODIUM_ION_TRANSMEMBRANE_TRANSPORT	http://www.gsea-msigdb.org/gsea/msigdb/human/geneset/GOBP_SODIUM_ION_TRANSMEMBRANE_TRANSPORT.html	2.15534	0	0.000206835
GOBP_REGULATION_OF_TRANSMEMBRANE_TRANSPORT	http://www.gsea-msigdb.org/gsea/msigdb/human/geneset/GOBP_REGULATION_OF_TRANSMEMBRANE_TRANSPORT.html	2.15272	0	0.000238896
GOBP_PROTEIN_LOCALIZATION_TO_CELL_JUNCTION	http://www.gsea-msigdb.org/gsea/msigdb/human/geneset/GOBP_PROTEIN_LOCALIZATION_TO_CELL_JUNCTION.html	2.15156	0	0.000233588
GOBP_REGULATION_OF_HEART_RATE	http://www.gsea-msigdb.org/gsea/msigdb/human/geneset/GOBP_REGULATION_OF_HEART_RATE.html	2.13624	0	0.00031599
GOBP_ATP_SYNTHESIS_COUPLED_ELECTRON_TRANSPORT	http://www.gsea-msigdb.org/gsea/msigdb/human/geneset/GOBP_ATP_SYNTHESIS_COUPLED_ELECTRON_TRANSPORT.html	2.12084	0	0.000377974
GOBP_POSITIVE_REGULATION_OF_SYNAPTIC_TRANSMISSION	http://www.gsea-msigdb.org/gsea/msigdb/human/geneset/GOBP_POSITIVE_REGULATION_OF_SYNAPTIC_TRANSMISSION.html	2.11987	0	0.0003701
GOBP_MEMBRANE_DEPOLARIZATION	http://www.gsea-msigdb.org/gsea/msigdb/human/geneset/GOBP_MEMBRANE_DEPOLARIZATION.html	2.11798	0	0.000362547
GOBP_REGULATION_OF_REGULATED_SECRETORY_PATHWAY	http://www.gsea-msigdb.org/gsea/msigdb/human/geneset/GOBP_REGULATION_OF_REGULATED_SECRETORY_PATHWAY.html	2.11772	0	0.000355296
GOBP_POTASSIUM_ION_TRANSPORT	http://www.gsea-msigdb.org/gsea/msigdb/human/geneset/GOBP_POTASSIUM_ION_TRANSPORT.html	2.10764	0	0.000380064
GOBP_REGULATION_OF_NEUROTRANSMITTER_LEVELS	http://www.gsea-msigdb.org/gsea/msigdb/human/geneset/GOBP_REGULATION_OF_NEUROTRANSMITTER_LEVELS.html	2.10749	0	0.000372755
GOBP_OXIDATIVE_PHOSPHORYLATION	http://www.gsea-msigdb.org/gsea/msigdb/human/geneset/GOBP_OXIDATIVE_PHOSPHORYLATION.html	2.09651	0	0.000365722
GOBP_NEGATIVE_REGULATION_OF_CHEMOTAXIS	http://www.gsea-msigdb.org/gsea/msigdb/human/geneset/GOBP_NEGATIVE_REGULATION_OF_CHEMOTAXIS.html	2.08205	0	0.000567524
GOBP_PROTEIN_LOCALIZATION_TO_POSTSYNAPSE	http://www.gsea-msigdb.org/gsea/msigdb/human/geneset/GOBP_PROTEIN_LOCALIZATION_TO_POSTSYNAPSE.html	2.07676	0	0.000645715
GOBP_REGULATION_OF_NERVOUS_SYSTEM_PROCESS	http://www.gsea-msigdb.org/gsea/msigdb/human/geneset/GOBP_REGULATION_OF_NERVOUS_SYSTEM_PROCESS.html	2.07323	0	0.000648591
GOBP_CELL_COMMUNICATION_INVOLVED_IN_CARDIAC_CONDUCTION	http://www.gsea-msigdb.org/gsea/msigdb/human/geneset/GOBP_CELL_COMMUNICATION_INVOLVED_IN_CARDIAC_CONDUCTION.html	2.06761	0	0.000665834
GOBP_POSITIVE_REGULATION_OF_CALCIUM_ION_TRANSMEMBRANE_TRANSPORTER_ACTIVITY	http://www.gsea-msigdb.org/gsea/msigdb/human/geneset/GOBP_POSITIVE_REGULATION_OF_CALCIUM_ION_TRANSMEMBRANE_TRANSPORTER_ACTIVITY.html	2.06619	0	0.000654354
GOBP_CARDIAC_MUSCLE_CONTRACTION	http://www.gsea-msigdb.org/gsea/msigdb/human/geneset/GOBP_CARDIAC_MUSCLE_CONTRACTION.html	2.06324	0	0.000684521
GOBP_CATION_TRANSMEMBRANE_TRANSPORT	http://www.gsea-msigdb.org/gsea/msigdb/human/geneset/GOBP_CATION_TRANSMEMBRANE_TRANSPORT.html	2.05735	0	0.000726939
GOBP_MODULATION_OF_EXCITATORY_POSTSYNAPTIC_POTENTIAL	http://www.gsea-msigdb.org/gsea/msigdb/human/geneset/GOBP_MODULATION_OF_EXCITATORY_POSTSYNAPTIC_POTENTIAL.html	2.03588	0	0.000992672
GOBP_STRIATED_MUSCLE_CONTRACTION	http://www.gsea-msigdb.org/gsea/msigdb/human/geneset/GOBP_STRIATED_MUSCLE_CONTRACTION.html	2.0347	0	0.00098968
GOBP_POSITIVE_REGULATION_OF_CALCIUM_ION_TRANSMEMBRANE_TRANSPORT	http://www.gsea-msigdb.org/gsea/msigdb/human/geneset/GOBP_POSITIVE_REGULATION_OF_CALCIUM_ION_TRANSMEMBRANE_TRANSPORT.html	2.03432	0	0.000973971
GOBP_POSITIVE_REGULATION_OF_CELL_JUNCTION_ASSEMBLY	http://www.gsea-msigdb.org/gsea/msigdb/human/geneset/GOBP_POSITIVE_REGULATION_OF_CELL_JUNCTION_ASSEMBLY.html	2.02772	0	0.00112241
GOBP_CELL_CELL_ADHESION_VIA_PLASMA_MEMBRANE_ADHESION_MOLECULES	http://www.gsea-msigdb.org/gsea/msigdb/human/geneset/GOBP_CELL_CELL_ADHESION_VIA_PLASMA_MEMBRANE_ADHESION_MOLECULES.html	2.02696	0	0.00111756
GOBP_REGULATION_OF_AXONOGENESIS	http://www.gsea-msigdb.org/gsea/msigdb/human/geneset/GOBP_REGULATION_OF_AXONOGENESIS.html	2.01153	0	0.00144292
GOBP_ACTIN_MEDIATED_CELL_CONTRACTION	http://www.gsea-msigdb.org/gsea/msigdb/human/geneset/GOBP_ACTIN_MEDIATED_CELL_CONTRACTION.html	2.0068	0	0.00149356
GOBP_POSTSYNAPSE_ASSEMBLY	http://www.gsea-msigdb.org/gsea/msigdb/human/geneset/GOBP_POSTSYNAPSE_ASSEMBLY.html	2.0059	0	0.00149526
GOBP_SODIUM_ION_TRANSPORT	http://www.gsea-msigdb.org/gsea/msigdb/human/geneset/GOBP_SODIUM_ION_TRANSPORT.html	1.99841	0	0.00160202
GOBP_POSITIVE_REGULATION_OF_CATION_CHANNEL_ACTIVITY	http://www.gsea-msigdb.org/gsea/msigdb/human/geneset/GOBP_POSITIVE_REGULATION_OF_CATION_CHANNEL_ACTIVITY.html	1.99525	0.00118765	0.00167133
GOBP_LONG_TERM_SYNAPTIC_POTENTIATION	http://www.gsea-msigdb.org/gsea/msigdb/human/geneset/GOBP_LONG_TERM_SYNAPTIC_POTENTIATION.html	1.99476	0.00110619	0.00168195
GOBP_REGULATION_OF_POSTSYNAPSE_ORGANIZATION	http://www.gsea-msigdb.org/gsea/msigdb/human/geneset/GOBP_REGULATION_OF_POSTSYNAPSE_ORGANIZATION.html	1.99231	0	0.00169206
GOBP_NEURON_RECOGNITION	http://www.gsea-msigdb.org/gsea/msigdb/human/geneset/GOBP_NEURON_RECOGNITION.html	1.98481	0	0.00182347
GOBP_INORGANIC_ION_TRANSMEMBRANE_TRANSPORT	http://www.gsea-msigdb.org/gsea/msigdb/human/geneset/GOBP_INORGANIC_ION_TRANSMEMBRANE_TRANSPORT.html	1.96962	0	0.00233298
GOBP_NEGATIVE_REGULATION_OF_AXONOGENESIS	http://www.gsea-msigdb.org/gsea/msigdb/human/geneset/GOBP_NEGATIVE_REGULATION_OF_AXONOGENESIS.html	1.96611	0	0.00243109
GOBP_CARDIAC_MUSCLE_CELL_CONTRACTION	http://www.gsea-msigdb.org/gsea/msigdb/human/geneset/GOBP_CARDIAC_MUSCLE_CELL_CONTRACTION.html	1.94983	0	0.00307878
GOBP_REGULATION_OF_CELL_JUNCTION_ASSEMBLY	http://www.gsea-msigdb.org/gsea/msigdb/human/geneset/GOBP_REGULATION_OF_CELL_JUNCTION_ASSEMBLY.html	1.94629	0	0.00320663
GOBP_PRESYNAPTIC_ENDOCYTOSIS	http://www.gsea-msigdb.org/gsea/msigdb/human/geneset/GOBP_PRESYNAPTIC_ENDOCYTOSIS.html	1.9392	0	0.00347569
GOBP_MITOCHONDRIAL_ELECTRON_TRANSPORT_CYTOCHROME_C_TO_OXYGEN	http://www.gsea-msigdb.org/gsea/msigdb/human/geneset/GOBP_MITOCHONDRIAL_ELECTRON_TRANSPORT_CYTOCHROME_C_TO_OXYGEN.html	1.93717	0	0.00353377
GOBP_REGULATION_OF_STRIATED_MUSCLE_CONTRACTION	http://www.gsea-msigdb.org/gsea/msigdb/human/geneset/GOBP_REGULATION_OF_STRIATED_MUSCLE_CONTRACTION.html	1.93362	0.0023753	0.00371137
GOBP_SYNAPTIC_VESICLE_RECYCLING	http://www.gsea-msigdb.org/gsea/msigdb/human/geneset/GOBP_SYNAPTIC_VESICLE_RECYCLING.html	1.93149	0	0.00376516
GOBP_SYNAPTIC_TRANSMISSION_GABAERGIC	http://www.gsea-msigdb.org/gsea/msigdb/human/geneset/GOBP_SYNAPTIC_TRANSMISSION_GABAERGIC.html	1.93122	0	0.00373908
GOBP_HOMOPHILIC_CELL_ADHESION_VIA_PLASMA_MEMBRANE_ADHESION_MOLECULES	http://www.gsea-msigdb.org/gsea/msigdb/human/geneset/GOBP_HOMOPHILIC_CELL_ADHESION_VIA_PLASMA_MEMBRANE_ADHESION_MOLECULES.html	1.93055	0	0.00371337
GOBP_RESPIRATORY_ELECTRON_TRANSPORT_CHAIN	http://www.gsea-msigdb.org/gsea/msigdb/human/geneset/GOBP_RESPIRATORY_ELECTRON_TRANSPORT_CHAIN.html	1.93014	0	0.00370738
GOBP_SYNAPTIC_VESICLE_LOCALIZATION	http://www.gsea-msigdb.org/gsea/msigdb/human/geneset/GOBP_SYNAPTIC_VESICLE_LOCALIZATION.html	1.92989	0	0.00367338
GOBP_PROTON_TRANSMEMBRANE_TRANSPORT	http://www.gsea-msigdb.org/gsea/msigdb/human/geneset/GOBP_PROTON_TRANSMEMBRANE_TRANSPORT.html	1.92655	0	0.00377143
GOBP_CELL_COMMUNICATION_BY_ELECTRICAL_COUPLING	http://www.gsea-msigdb.org/gsea/msigdb/human/geneset/GOBP_CELL_COMMUNICATION_BY_ELECTRICAL_COUPLING.html	1.92607	0.00120048	0.00376513
GOBP_POSITIVE_REGULATION_OF_NERVOUS_SYSTEM_DEVELOPMENT	http://www.gsea-msigdb.org/gsea/msigdb/human/geneset/GOBP_POSITIVE_REGULATION_OF_NERVOUS_SYSTEM_DEVELOPMENT.html	1.92242	0	0.00391493
GOBP_POSITIVE_REGULATION_OF_CATION_TRANSMEMBRANE_TRANSPORT	http://www.gsea-msigdb.org/gsea/msigdb/human/geneset/GOBP_POSITIVE_REGULATION_OF_CATION_TRANSMEMBRANE_TRANSPORT.html	1.92077	0	0.00397964
GOBP_POSTSYNAPSE_ORGANIZATION	http://www.gsea-msigdb.org/gsea/msigdb/human/geneset/GOBP_POSTSYNAPSE_ORGANIZATION.html	1.91891	0	0.00405173
GOBP_ACTIN_FILAMENT_BASED_MOVEMENT	http://www.gsea-msigdb.org/gsea/msigdb/human/geneset/GOBP_ACTIN_FILAMENT_BASED_MOVEMENT.html	1.91207	0	0.0043705
GOBP_REGULATION_OF_CARDIAC_MUSCLE_CONTRACTION	http://www.gsea-msigdb.org/gsea/msigdb/human/geneset/GOBP_REGULATION_OF_CARDIAC_MUSCLE_CONTRACTION.html	1.90616	0	0.00466506
GOBP_POSTSYNAPTIC_SPECIALIZATION_ORGANIZATION	http://www.gsea-msigdb.org/gsea/msigdb/human/geneset/GOBP_POSTSYNAPTIC_SPECIALIZATION_ORGANIZATION.html	1.90597	0	0.0046149
GOBP_COTRANSLATIONAL_PROTEIN_TARGETING_TO_MEMBRANE	http://www.gsea-msigdb.org/gsea/msigdb/human/geneset/GOBP_COTRANSLATIONAL_PROTEIN_TARGETING_TO_MEMBRANE.html	1.90414	0	0.00466906
GOBP_POSITIVE_REGULATION_OF_TRANSPORTER_ACTIVITY	http://www.gsea-msigdb.org/gsea/msigdb/human/geneset/GOBP_POSITIVE_REGULATION_OF_TRANSPORTER_ACTIVITY.html	1.90199	0	0.004798
GOBP_CATION_TRANSPORT	http://www.gsea-msigdb.org/gsea/msigdb/human/geneset/GOBP_CATION_TRANSPORT.html	1.90156	0	0.0047648
GOBP_POSITIVE_REGULATION_OF_REGULATED_SECRETORY_PATHWAY	http://www.gsea-msigdb.org/gsea/msigdb/human/geneset/GOBP_POSITIVE_REGULATION_OF_REGULATED_SECRETORY_PATHWAY.html	1.90145	0.00120773	0.00472405
GOBP_CALCIUM_MEDIATED_SIGNALING	http://www.gsea-msigdb.org/gsea/msigdb/human/geneset/GOBP_CALCIUM_MEDIATED_SIGNALING.html	1.89781	0	0.00488978
GOBP_NEURON_PROJECTION_ORGANIZATION	http://www.gsea-msigdb.org/gsea/msigdb/human/geneset/GOBP_NEURON_PROJECTION_ORGANIZATION.html	1.89744	0	0.00485661
GOBP_NEUROMUSCULAR_PROCESS	http://www.gsea-msigdb.org/gsea/msigdb/human/geneset/GOBP_NEUROMUSCULAR_PROCESS.html	1.8962	0	0.00488867
GOBP_LONG_TERM_SYNAPTIC_DEPRESSION	http://www.gsea-msigdb.org/gsea/msigdb/human/geneset/GOBP_LONG_TERM_SYNAPTIC_DEPRESSION.html	1.89245	0	0.0051923
GOBP_TRANSLATIONAL_INITIATION	http://www.gsea-msigdb.org/gsea/msigdb/human/geneset/GOBP_TRANSLATIONAL_INITIATION.html	1.89075	0	0.00530769
GOBP_EXOCYTIC_PROCESS	http://www.gsea-msigdb.org/gsea/msigdb/human/geneset/GOBP_EXOCYTIC_PROCESS.html	1.88495	0	0.00567832
GOBP_SECOND_MESSENGER_MEDIATED_SIGNALING	http://www.gsea-msigdb.org/gsea/msigdb/human/geneset/GOBP_SECOND_MESSENGER_MEDIATED_SIGNALING.html	1.88096	0	0.0060734
GOBP_RESPONSE_TO_AMINE	http://www.gsea-msigdb.org/gsea/msigdb/human/geneset/GOBP_RESPONSE_TO_AMINE.html	1.87009	0	0.0070603
GOBP_NEGATIVE_REGULATION_OF_SYNAPTIC_TRANSMISSION	http://www.gsea-msigdb.org/gsea/msigdb/human/geneset/GOBP_NEGATIVE_REGULATION_OF_SYNAPTIC_TRANSMISSION.html	1.8663	0	0.00730487
GOBP_CENTRAL_NERVOUS_SYSTEM_NEURON_DEVELOPMENT	http://www.gsea-msigdb.org/gsea/msigdb/human/geneset/GOBP_CENTRAL_NERVOUS_SYSTEM_NEURON_DEVELOPMENT.html	1.8587	0	0.00806582
GOBP_MITOCHONDRIAL_ELECTRON_TRANSPORT_NADH_TO_UBIQUINONE	http://www.gsea-msigdb.org/gsea/msigdb/human/geneset/GOBP_MITOCHONDRIAL_ELECTRON_TRANSPORT_NADH_TO_UBIQUINONE.html	1.85251	0.00115607	0.00874501
GOBP_REGULATION_OF_VOLTAGE_GATED_CALCIUM_CHANNEL_ACTIVITY	http://www.gsea-msigdb.org/gsea/msigdb/human/geneset/GOBP_REGULATION_OF_VOLTAGE_GATED_CALCIUM_CHANNEL_ACTIVITY.html	1.83122	0.00121212	0.0116093
GOBP_PROTEIN_LOCALIZATION_TO_ENDOPLASMIC_RETICULUM	http://www.gsea-msigdb.org/gsea/msigdb/human/geneset/GOBP_PROTEIN_LOCALIZATION_TO_ENDOPLASMIC_RETICULUM.html	1.83071	0	0.0115767
GOBP_ESTABLISHMENT_OF_PROTEIN_LOCALIZATION_TO_ENDOPLASMIC_RETICULUM	http://www.gsea-msigdb.org/gsea/msigdb/human/geneset/GOBP_ESTABLISHMENT_OF_PROTEIN_LOCALIZATION_TO_ENDOPLASMIC_RETICULUM.html	1.82278	0	0.0125698
GOBP_BEHAVIOR	http://www.gsea-msigdb.org/gsea/msigdb/human/geneset/GOBP_BEHAVIOR.html	1.81895	0	0.0131695
GOBP_NUCLEAR_TRANSCRIBED_MRNA_CATABOLIC_PROCESS_NONSENSE_MEDIATED_DECAY	http://www.gsea-msigdb.org/gsea/msigdb/human/geneset/GOBP_NUCLEAR_TRANSCRIBED_MRNA_CATABOLIC_PROCESS_NONSENSE_MEDIATED_DECAY.html	1.81845	0	0.013167
GOBP_DENDRITIC_SPINE_DEVELOPMENT	http://www.gsea-msigdb.org/gsea/msigdb/human/geneset/GOBP_DENDRITIC_SPINE_DEVELOPMENT.html	1.8142	0.00106496	0.0136887
GOBP_ADULT_BEHAVIOR	http://www.gsea-msigdb.org/gsea/msigdb/human/geneset/GOBP_ADULT_BEHAVIOR.html	1.81307	0.00108108	0.0138011
GOBP_CHLORIDE_TRANSPORT	http://www.gsea-msigdb.org/gsea/msigdb/human/geneset/GOBP_CHLORIDE_TRANSPORT.html	1.81054	0	0.0142931
GOBP_HETEROPHILIC_CELL_CELL_ADHESION_VIA_PLASMA_MEMBRANE_CELL_ADHESION_MOLECULES	http://www.gsea-msigdb.org/gsea/msigdb/human/geneset/GOBP_HETEROPHILIC_CELL_CELL_ADHESION_VIA_PLASMA_MEMBRANE_CELL_ADHESION_MOLECULES.html	1.79993	0.00246002	0.0160794
GOBP_REGULATION_OF_NERVOUS_SYSTEM_DEVELOPMENT	http://www.gsea-msigdb.org/gsea/msigdb/human/geneset/GOBP_REGULATION_OF_NERVOUS_SYSTEM_DEVELOPMENT.html	1.79871	0	0.0161345
GOBP_CELL_JUNCTION_ORGANIZATION	http://www.gsea-msigdb.org/gsea/msigdb/human/geneset/GOBP_CELL_JUNCTION_ORGANIZATION.html	1.79686	0	0.0163576
GOBP_CEREBRAL_CORTEX_CELL_MIGRATION	http://www.gsea-msigdb.org/gsea/msigdb/human/geneset/GOBP_CEREBRAL_CORTEX_CELL_MIGRATION.html	1.79656	0.00481348	0.0162884
GOBP_REGULATION_OF_POTASSIUM_ION_TRANSPORT	http://www.gsea-msigdb.org/gsea/msigdb/human/geneset/GOBP_REGULATION_OF_POTASSIUM_ION_TRANSPORT.html	1.79494	0.00110619	0.0164804
GOBP_REGULATION_OF_NEURON_PROJECTION_DEVELOPMENT	http://www.gsea-msigdb.org/gsea/msigdb/human/geneset/GOBP_REGULATION_OF_NEURON_PROJECTION_DEVELOPMENT.html	1.78755	0	0.0179502
GOBP_NERVOUS_SYSTEM_PROCESS	http://www.gsea-msigdb.org/gsea/msigdb/human/geneset/GOBP_NERVOUS_SYSTEM_PROCESS.html	1.78462	0	0.0183813
GOBP_NEURON_PROJECTION_EXTENSION	http://www.gsea-msigdb.org/gsea/msigdb/human/geneset/GOBP_NEURON_PROJECTION_EXTENSION.html	1.78442	0	0.0182721
GOBP_NEGATIVE_REGULATION_OF_AXON_EXTENSION	http://www.gsea-msigdb.org/gsea/msigdb/human/geneset/GOBP_NEGATIVE_REGULATION_OF_AXON_EXTENSION.html	1.78383	0.00357569	0.0182874
GOBP_CELL_COMMUNICATION_BY_ELECTRICAL_COUPLING_INVOLVED_IN_CARDIAC_CONDUCTION	http://www.gsea-msigdb.org/gsea/msigdb/human/geneset/GOBP_CELL_COMMUNICATION_BY_ELECTRICAL_COUPLING_INVOLVED_IN_CARDIAC_CONDUCTION.html	1.77956	0.00722892	0.0190378
GOBP_CELL_MORPHOGENESIS_INVOLVED_IN_NEURON_DIFFERENTIATION	http://www.gsea-msigdb.org/gsea/msigdb/human/geneset/GOBP_CELL_MORPHOGENESIS_INVOLVED_IN_NEURON_DIFFERENTIATION.html	1.77861	0	0.0190847
GOBP_ELECTRON_TRANSPORT_CHAIN	http://www.gsea-msigdb.org/gsea/msigdb/human/geneset/GOBP_ELECTRON_TRANSPORT_CHAIN.html	1.77742	0	0.019194
GOBP_CELLULAR_RESPIRATION	http://www.gsea-msigdb.org/gsea/msigdb/human/geneset/GOBP_CELLULAR_RESPIRATION.html	1.77688	0	0.0191575
GOBP_SIGNAL_RELEASE	http://www.gsea-msigdb.org/gsea/msigdb/human/geneset/GOBP_SIGNAL_RELEASE.html	1.77127	0	0.0201631
GOBP_REGULATION_OF_DENDRITIC_SPINE_MORPHOGENESIS	http://www.gsea-msigdb.org/gsea/msigdb/human/geneset/GOBP_REGULATION_OF_DENDRITIC_SPINE_MORPHOGENESIS.html	1.77089	0	0.0201135
GOBP_CELL_PART_MORPHOGENESIS	http://www.gsea-msigdb.org/gsea/msigdb/human/geneset/GOBP_CELL_PART_MORPHOGENESIS.html	1.76468	0	0.0214082
GOBP_G_PROTEIN_COUPLED_RECEPTOR_SIGNALING_PATHWAY	http://www.gsea-msigdb.org/gsea/msigdb/human/geneset/GOBP_G_PROTEIN_COUPLED_RECEPTOR_SIGNALING_PATHWAY.html	1.76175	0	0.0219566
GOBP_LEARNING	http://www.gsea-msigdb.org/gsea/msigdb/human/geneset/GOBP_LEARNING.html	1.76166	0	0.0218169
GOBP_NADH_DEHYDROGENASE_COMPLEX_ASSEMBLY	http://www.gsea-msigdb.org/gsea/msigdb/human/geneset/GOBP_NADH_DEHYDROGENASE_COMPLEX_ASSEMBLY.html	1.75904	0.0034642	0.0222102
GOBP_NEURON_PROJECTION_GUIDANCE	http://www.gsea-msigdb.org/gsea/msigdb/human/geneset/GOBP_NEURON_PROJECTION_GUIDANCE.html	1.75724	0	0.0225744
GOBP_REGULATION_OF_SODIUM_ION_TRANSMEMBRANE_TRANSPORTER_ACTIVITY	http://www.gsea-msigdb.org/gsea/msigdb/human/geneset/GOBP_REGULATION_OF_SODIUM_ION_TRANSMEMBRANE_TRANSPORTER_ACTIVITY.html	1.75579	0	0.0227509
GOBP_LOCOMOTORY_BEHAVIOR	http://www.gsea-msigdb.org/gsea/msigdb/human/geneset/GOBP_LOCOMOTORY_BEHAVIOR.html	1.74151	0	0.0266513
GOBP_REGULATION_OF_POTASSIUM_ION_TRANSMEMBRANE_TRANSPORTER_ACTIVITY	http://www.gsea-msigdb.org/gsea/msigdb/human/geneset/GOBP_REGULATION_OF_POTASSIUM_ION_TRANSMEMBRANE_TRANSPORTER_ACTIVITY.html	1.7413	0.00236127	0.0265061
GOBP_REGULATION_OF_SODIUM_ION_TRANSPORT	http://www.gsea-msigdb.org/gsea/msigdb/human/geneset/GOBP_REGULATION_OF_SODIUM_ION_TRANSPORT.html	1.74051	0.00220507	0.0265589
GOBP_INORGANIC_ANION_TRANSPORT	http://www.gsea-msigdb.org/gsea/msigdb/human/geneset/GOBP_INORGANIC_ANION_TRANSPORT.html	1.74031	0.0087146	0.0264678
GOBP_REGULATION_OF_DENDRITIC_SPINE_DEVELOPMENT	http://www.gsea-msigdb.org/gsea/msigdb/human/geneset/GOBP_REGULATION_OF_DENDRITIC_SPINE_DEVELOPMENT.html	1.74025	0.00111982	0.0262871
GOBP_DENDRITIC_SPINE_MORPHOGENESIS	http://www.gsea-msigdb.org/gsea/msigdb/human/geneset/GOBP_DENDRITIC_SPINE_MORPHOGENESIS.html	1.73567	0.00113122	0.0276089
GOBP_REGULATION_OF_DENDRITE_DEVELOPMENT	http://www.gsea-msigdb.org/gsea/msigdb/human/geneset/GOBP_REGULATION_OF_DENDRITE_DEVELOPMENT.html	1.73233	0.00108696	0.0284982
GOBP_CELL_JUNCTION_ASSEMBLY	http://www.gsea-msigdb.org/gsea/msigdb/human/geneset/GOBP_CELL_JUNCTION_ASSEMBLY.html	1.72764	0	0.0298643
GOBP_REGULATION_OF_CALCIUM_ION_TRANSMEMBRANE_TRANSPORTER_ACTIVITY	http://www.gsea-msigdb.org/gsea/msigdb/human/geneset/GOBP_REGULATION_OF_CALCIUM_ION_TRANSMEMBRANE_TRANSPORTER_ACTIVITY.html	1.72497	0.00348432	0.0305656
GOBP_POSITIVE_REGULATION_OF_EXOCYTOSIS	http://www.gsea-msigdb.org/gsea/msigdb/human/geneset/GOBP_POSITIVE_REGULATION_OF_EXOCYTOSIS.html	1.72211	0.00438597	0.0314447
GOBP_TRANSFERRIN_TRANSPORT	http://www.gsea-msigdb.org/gsea/msigdb/human/geneset/GOBP_TRANSFERRIN_TRANSPORT.html	1.72208	0.00603865	0.0312323
GOBP_VIRAL_GENE_EXPRESSION	http://www.gsea-msigdb.org/gsea/msigdb/human/geneset/GOBP_VIRAL_GENE_EXPRESSION.html	1.72105	0	0.0313966
GOBP_RRNA_METABOLIC_PROCESS	http://www.gsea-msigdb.org/gsea/msigdb/human/geneset/GOBP_RRNA_METABOLIC_PROCESS.html	1.71984	0.00104822	0.0316008
GOBP_NEGATIVE_REGULATION_OF_NERVOUS_SYSTEM_DEVELOPMENT	http://www.gsea-msigdb.org/gsea/msigdb/human/geneset/GOBP_NEGATIVE_REGULATION_OF_NERVOUS_SYSTEM_DEVELOPMENT.html	1.71842	0	0.0319037
GOBP_DENDRITE_MORPHOGENESIS	http://www.gsea-msigdb.org/gsea/msigdb/human/geneset/GOBP_DENDRITE_MORPHOGENESIS.html	1.71474	0	0.0328769
GOBP_MEMBRANE_BIOGENESIS	http://www.gsea-msigdb.org/gsea/msigdb/human/geneset/GOBP_MEMBRANE_BIOGENESIS.html	1.71358	0.0059312	0.0330308
GOBP_REGULATION_OF_SYNAPTIC_VESICLE_RECYCLING	http://www.gsea-msigdb.org/gsea/msigdb/human/geneset/GOBP_REGULATION_OF_SYNAPTIC_VESICLE_RECYCLING.html	1.71358	0.00497512	0.0328163
GOBP_REGULATION_OF_CALCIUM_ION_TRANSMEMBRANE_TRANSPORT	http://www.gsea-msigdb.org/gsea/msigdb/human/geneset/GOBP_REGULATION_OF_CALCIUM_ION_TRANSMEMBRANE_TRANSPORT.html	1.712	0	0.0332851
GOBP_PROTEIN_TARGETING_TO_MEMBRANE	http://www.gsea-msigdb.org/gsea/msigdb/human/geneset/GOBP_PROTEIN_TARGETING_TO_MEMBRANE.html	1.71183	0	0.0331388
GOBP_DENDRITE_DEVELOPMENT	http://www.gsea-msigdb.org/gsea/msigdb/human/geneset/GOBP_DENDRITE_DEVELOPMENT.html	1.7101	0	0.0336515
GOBP_ATP_METABOLIC_PROCESS	http://www.gsea-msigdb.org/gsea/msigdb/human/geneset/GOBP_ATP_METABOLIC_PROCESS.html	1.70901	0	0.0338823
GOBP_CELLULAR_COMPONENT_MORPHOGENESIS	http://www.gsea-msigdb.org/gsea/msigdb/human/geneset/GOBP_CELLULAR_COMPONENT_MORPHOGENESIS.html	1.70632	0	0.0346684
GOBP_REGULATION_OF_METAL_ION_TRANSPORT	http://www.gsea-msigdb.org/gsea/msigdb/human/geneset/GOBP_REGULATION_OF_METAL_ION_TRANSPORT.html	1.7054	0	0.0347941
GOBP_CENTRAL_NERVOUS_SYSTEM_NEURON_AXONOGENESIS	http://www.gsea-msigdb.org/gsea/msigdb/human/geneset/GOBP_CENTRAL_NERVOUS_SYSTEM_NEURON_AXONOGENESIS.html	1.70133	0.0120627	0.0362364
GOBP_REGULATION_OF_DENDRITE_MORPHOGENESIS	http://www.gsea-msigdb.org/gsea/msigdb/human/geneset/GOBP_REGULATION_OF_DENDRITE_MORPHOGENESIS.html	1.69686	0.00444939	0.0379097
GOBP_CARDIAC_CONDUCTION	http://www.gsea-msigdb.org/gsea/msigdb/human/geneset/GOBP_CARDIAC_CONDUCTION.html	1.69618	0.00322234	0.0379342
GOBP_DEVELOPMENTAL_GROWTH_INVOLVED_IN_MORPHOGENESIS	http://www.gsea-msigdb.org/gsea/msigdb/human/geneset/GOBP_DEVELOPMENTAL_GROWTH_INVOLVED_IN_MORPHOGENESIS.html	1.69372	0	0.0388252
GOBP_AXON_DEVELOPMENT	http://www.gsea-msigdb.org/gsea/msigdb/human/geneset/GOBP_AXON_DEVELOPMENT.html	1.68495	0	0.0423087
GOBP_PROTEIN_DEPOLYMERIZATION	http://www.gsea-msigdb.org/gsea/msigdb/human/geneset/GOBP_PROTEIN_DEPOLYMERIZATION.html	1.68322	0.00652174	0.0427963
GOBP_AMINE_TRANSPORT	http://www.gsea-msigdb.org/gsea/msigdb/human/geneset/GOBP_AMINE_TRANSPORT.html	1.67806	0.00962696	0.0449265
GOBP_ESTABLISHMENT_OF_PROTEIN_LOCALIZATION_TO_MEMBRANE	http://www.gsea-msigdb.org/gsea/msigdb/human/geneset/GOBP_ESTABLISHMENT_OF_PROTEIN_LOCALIZATION_TO_MEMBRANE.html	1.67642	0	0.0453841
GOBP_REGULATION_OF_RELEASE_OF_SEQUESTERED_CALCIUM_ION_INTO_CYTOSOL	http://www.gsea-msigdb.org/gsea/msigdb/human/geneset/GOBP_REGULATION_OF_RELEASE_OF_SEQUESTERED_CALCIUM_ION_INTO_CYTOSOL.html	1.67619	0.00576037	0.0452206
GOBP_MEMBRANE_REPOLARIZATION	http://www.gsea-msigdb.org/gsea/msigdb/human/geneset/GOBP_MEMBRANE_REPOLARIZATION.html	1.6722	0.00974422	0.0466827
GOBP_REGULATION_OF_HEART_CONTRACTION	http://www.gsea-msigdb.org/gsea/msigdb/human/geneset/GOBP_REGULATION_OF_HEART_CONTRACTION.html	1.67169	0.00315457	0.0466594
GOBP_POSITIVE_REGULATION_OF_AXONOGENESIS	http://www.gsea-msigdb.org/gsea/msigdb/human/geneset/GOBP_POSITIVE_REGULATION_OF_AXONOGENESIS.html	1.67082	0.00323974	0.0467167
GOBP_RIBOSOMAL_LARGE_SUBUNIT_BIOGENESIS	http://www.gsea-msigdb.org/gsea/msigdb/human/geneset/GOBP_RIBOSOMAL_LARGE_SUBUNIT_BIOGENESIS.html	1.66985	0.00925926	0.0469314
GOBP_BIOLOGICAL_PROCESS_INVOLVED_IN_INTRASPECIES_INTERACTION_BETWEEN_ORGANISMS	http://www.gsea-msigdb.org/gsea/msigdb/human/geneset/GOBP_BIOLOGICAL_PROCESS_INVOLVED_IN_INTRASPECIES_INTERACTION_BETWEEN_ORGANISMS.html	1.66815	0.00859951	0.0474311
GOBP_SARCOPLASMIC_RETICULUM_CALCIUM_ION_TRANSPORT	http://www.gsea-msigdb.org/gsea/msigdb/human/geneset/GOBP_SARCOPLASMIC_RETICULUM_CALCIUM_ION_TRANSPORT.html	1.6674	0.0147059	0.0475015
GOBP_DEVELOPMENTAL_CELL_GROWTH	http://www.gsea-msigdb.org/gsea/msigdb/human/geneset/GOBP_DEVELOPMENTAL_CELL_GROWTH.html	1.66268	0	0.0497097
GOBP_REGULATION_OF_BLOOD_CIRCULATION	http://www.gsea-msigdb.org/gsea/msigdb/human/geneset/GOBP_REGULATION_OF_BLOOD_CIRCULATION.html	1.65772	0	0.0519988
GOBP_REGULATION_OF_CYCLASE_ACTIVITY	http://www.gsea-msigdb.org/gsea/msigdb/human/geneset/GOBP_REGULATION_OF_CYCLASE_ACTIVITY.html	1.65444	0.0107399	0.0534958
GOBP_SYNAPTIC_VESICLE_TRANSPORT	http://www.gsea-msigdb.org/gsea/msigdb/human/geneset/GOBP_SYNAPTIC_VESICLE_TRANSPORT.html	1.65373	0.0107784	0.0535761
GOBP_CYTOPLASMIC_TRANSLATION	http://www.gsea-msigdb.org/gsea/msigdb/human/geneset/GOBP_CYTOPLASMIC_TRANSLATION.html	1.65029	0.00105708	0.0552361
GOBP_CALCIUM_ION_TRANSMEMBRANE_TRANSPORT	http://www.gsea-msigdb.org/gsea/msigdb/human/geneset/GOBP_CALCIUM_ION_TRANSMEMBRANE_TRANSPORT.html	1.65005	0.00103093	0.0550331
GOBP_NEGATIVE_REGULATION_OF_CELL_PROJECTION_ORGANIZATION	http://www.gsea-msigdb.org/gsea/msigdb/human/geneset/GOBP_NEGATIVE_REGULATION_OF_CELL_PROJECTION_ORGANIZATION.html	1.64815	0.00103734	0.0558159
GOBP_AXON_EXTENSION	http://www.gsea-msigdb.org/gsea/msigdb/human/geneset/GOBP_AXON_EXTENSION.html	1.64414	0	0.0575819
GOBP_VENTRICULAR_SEPTUM_MORPHOGENESIS	http://www.gsea-msigdb.org/gsea/msigdb/human/geneset/GOBP_VENTRICULAR_SEPTUM_MORPHOGENESIS.html	1.64175	0.0251572	0.0586929
GOBP_REGULATION_OF_SECRETION	http://www.gsea-msigdb.org/gsea/msigdb/human/geneset/GOBP_REGULATION_OF_SECRETION.html	1.64071	0	0.0589645
GOBP_LOCALIZATION_WITHIN_MEMBRANE	http://www.gsea-msigdb.org/gsea/msigdb/human/geneset/GOBP_LOCALIZATION_WITHIN_MEMBRANE.html	1.63545	0.00684151	0.0618905
GOBP_POSITIVE_REGULATION_OF_TRANSMEMBRANE_TRANSPORT	http://www.gsea-msigdb.org/gsea/msigdb/human/geneset/GOBP_POSITIVE_REGULATION_OF_TRANSMEMBRANE_TRANSPORT.html	1.63276	0.00210748	0.0632762
GOBP_FOREBRAIN_GENERATION_OF_NEURONS	http://www.gsea-msigdb.org/gsea/msigdb/human/geneset/GOBP_FOREBRAIN_GENERATION_OF_NEURONS.html	1.63267	0.00932401	0.063008
GOBP_CELL_MORPHOGENESIS_INVOLVED_IN_DIFFERENTIATION	http://www.gsea-msigdb.org/gsea/msigdb/human/geneset/GOBP_CELL_MORPHOGENESIS_INVOLVED_IN_DIFFERENTIATION.html	1.63257	0	0.0627473
GOBP_NEGATIVE_REGULATION_OF_CELL_GROWTH	http://www.gsea-msigdb.org/gsea/msigdb/human/geneset/GOBP_NEGATIVE_REGULATION_OF_CELL_GROWTH.html	1.63046	0.00215517	0.0635842
GOBP_RIBONUCLEOTIDE_CATABOLIC_PROCESS	http://www.gsea-msigdb.org/gsea/msigdb/human/geneset/GOBP_RIBONUCLEOTIDE_CATABOLIC_PROCESS.html	1.6303	0.022113	0.0633401
GOBP_INORGANIC_ANION_TRANSMEMBRANE_TRANSPORT	http://www.gsea-msigdb.org/gsea/msigdb/human/geneset/GOBP_INORGANIC_ANION_TRANSMEMBRANE_TRANSPORT.html	1.62889	0.00798176	0.0639677
GOBP_REGULATION_OF_POSTSYNAPTIC_MEMBRANE_NEUROTRANSMITTER_RECEPTOR_LEVELS	http://www.gsea-msigdb.org/gsea/msigdb/human/geneset/GOBP_REGULATION_OF_POSTSYNAPTIC_MEMBRANE_NEUROTRANSMITTER_RECEPTOR_LEVELS.html	1.62789	0.01812	0.0642459
GOBP_REGULATION_OF_SODIUM_ION_TRANSMEMBRANE_TRANSPORT	http://www.gsea-msigdb.org/gsea/msigdb/human/geneset/GOBP_REGULATION_OF_SODIUM_ION_TRANSMEMBRANE_TRANSPORT.html	1.62657	0.010274	0.0648204
GOBP_PEPTIDYL_CYSTEINE_MODIFICATION	http://www.gsea-msigdb.org/gsea/msigdb/human/geneset/GOBP_PEPTIDYL_CYSTEINE_MODIFICATION.html	1.62626	0.015873	0.0646994
GOBP_NEGATIVE_REGULATION_OF_DEPHOSPHORYLATION	http://www.gsea-msigdb.org/gsea/msigdb/human/geneset/GOBP_NEGATIVE_REGULATION_OF_DEPHOSPHORYLATION.html	1.6261	0.00547046	0.0644848
GOBP_REGULATION_OF_SYSTEM_PROCESS	http://www.gsea-msigdb.org/gsea/msigdb/human/geneset/GOBP_REGULATION_OF_SYSTEM_PROCESS.html	1.62596	0.00101317	0.0642065
GOBP_VESICLE_DOCKING	http://www.gsea-msigdb.org/gsea/msigdb/human/geneset/GOBP_VESICLE_DOCKING.html	1.62501	0.00688073	0.0645425
GOBP_NEGATIVE_REGULATION_OF_NEURON_PROJECTION_DEVELOPMENT	http://www.gsea-msigdb.org/gsea/msigdb/human/geneset/GOBP_NEGATIVE_REGULATION_OF_NEURON_PROJECTION_DEVELOPMENT.html	1.62376	0.00532481	0.0650204
GOBP_AEROBIC_RESPIRATION	http://www.gsea-msigdb.org/gsea/msigdb/human/geneset/GOBP_AEROBIC_RESPIRATION.html	1.62195	0.00441014	0.0658564
GOBP_COGNITION	http://www.gsea-msigdb.org/gsea/msigdb/human/geneset/GOBP_COGNITION.html	1.61929	0	0.0672576
GOBP_CAMP_MEDIATED_SIGNALING	http://www.gsea-msigdb.org/gsea/msigdb/human/geneset/GOBP_CAMP_MEDIATED_SIGNALING.html	1.61801	0.00918485	0.0678113
GOBP_RIBONUCLEOPROTEIN_COMPLEX_BIOGENESIS	http://www.gsea-msigdb.org/gsea/msigdb/human/geneset/GOBP_RIBONUCLEOPROTEIN_COMPLEX_BIOGENESIS.html	1.6156	0	0.0691776
GOBP_RIBOSOME_BIOGENESIS	http://www.gsea-msigdb.org/gsea/msigdb/human/geneset/GOBP_RIBOSOME_BIOGENESIS.html	1.61293	0.00104493	0.0707647
GOBP_CALCIUM_ION_IMPORT	http://www.gsea-msigdb.org/gsea/msigdb/human/geneset/GOBP_CALCIUM_ION_IMPORT.html	1.60732	0.0114286	0.0745231
GOBP_CYCLIC_NUCLEOTIDE_MEDIATED_SIGNALING	http://www.gsea-msigdb.org/gsea/msigdb/human/geneset/GOBP_CYCLIC_NUCLEOTIDE_MEDIATED_SIGNALING.html	1.60633	0.00986842	0.0748976
GOBP_POSITIVE_REGULATION_OF_NEURON_APOPTOTIC_PROCESS	http://www.gsea-msigdb.org/gsea/msigdb/human/geneset/GOBP_POSITIVE_REGULATION_OF_NEURON_APOPTOTIC_PROCESS.html	1.60551	0.0132371	0.0751204
GOBP_CENTRAL_NERVOUS_SYSTEM_NEURON_DIFFERENTIATION	http://www.gsea-msigdb.org/gsea/msigdb/human/geneset/GOBP_CENTRAL_NERVOUS_SYSTEM_NEURON_DIFFERENTIATION.html	1.60456	0	0.0754646
GOBP_INNER_MITOCHONDRIAL_MEMBRANE_ORGANIZATION	http://www.gsea-msigdb.org/gsea/msigdb/human/geneset/GOBP_INNER_MITOCHONDRIAL_MEMBRANE_ORGANIZATION.html	1.59851	0.0140515	0.0798569
GOBP_REGULATION_OF_CELL_PROJECTION_ORGANIZATION	http://www.gsea-msigdb.org/gsea/msigdb/human/geneset/GOBP_REGULATION_OF_CELL_PROJECTION_ORGANIZATION.html	1.59573	0	0.0816962
GOBP_VESICLE_LOCALIZATION	http://www.gsea-msigdb.org/gsea/msigdb/human/geneset/GOBP_VESICLE_LOCALIZATION.html	1.59536	0.00207469	0.0815499
GOBP_CRISTAE_FORMATION	http://www.gsea-msigdb.org/gsea/msigdb/human/geneset/GOBP_CRISTAE_FORMATION.html	1.5947	0.0158151	0.0817282
GOBP_ADULT_LOCOMOTORY_BEHAVIOR	http://www.gsea-msigdb.org/gsea/msigdb/human/geneset/GOBP_ADULT_LOCOMOTORY_BEHAVIOR.html	1.59443	0.0168919	0.0815447
GOBP_SEMAPHORIN_PLEXIN_SIGNALING_PATHWAY	http://www.gsea-msigdb.org/gsea/msigdb/human/geneset/GOBP_SEMAPHORIN_PLEXIN_SIGNALING_PATHWAY.html	1.58952	0.0183599	0.0853574
GOBP_CELL_RECOGNITION	http://www.gsea-msigdb.org/gsea/msigdb/human/geneset/GOBP_CELL_RECOGNITION.html	1.58793	0.0110865	0.0861418
GOBP_HETEROTYPIC_CELL_CELL_ADHESION	http://www.gsea-msigdb.org/gsea/msigdb/human/geneset/GOBP_HETEROTYPIC_CELL_CELL_ADHESION.html	1.58731	0.022113	0.0861726
GOBP_DENDRITE_EXTENSION	http://www.gsea-msigdb.org/gsea/msigdb/human/geneset/GOBP_DENDRITE_EXTENSION.html	1.58674	0.0182039	0.0862662
GOBP_RIBOSOMAL_SMALL_SUBUNIT_BIOGENESIS	http://www.gsea-msigdb.org/gsea/msigdb/human/geneset/GOBP_RIBOSOMAL_SMALL_SUBUNIT_BIOGENESIS.html	1.5838	0.0161663	0.0882162
GOBP_REGULATION_OF_CYTOSOLIC_CALCIUM_ION_CONCENTRATION	http://www.gsea-msigdb.org/gsea/msigdb/human/geneset/GOBP_REGULATION_OF_CYTOSOLIC_CALCIUM_ION_CONCENTRATION.html	1.58337	0.00208117	0.0881928
GOBP_PALLIUM_DEVELOPMENT	http://www.gsea-msigdb.org/gsea/msigdb/human/geneset/GOBP_PALLIUM_DEVELOPMENT.html	1.58216	0.00533618	0.0888178
GOBP_REGULATION_OF_EXTENT_OF_CELL_GROWTH	http://www.gsea-msigdb.org/gsea/msigdb/human/geneset/GOBP_REGULATION_OF_EXTENT_OF_CELL_GROWTH.html	1.58157	0.00644468	0.0888756
GOBP_MITOCHONDRIAL_RESPIRATORY_CHAIN_COMPLEX_ASSEMBLY	http://www.gsea-msigdb.org/gsea/msigdb/human/geneset/GOBP_MITOCHONDRIAL_RESPIRATORY_CHAIN_COMPLEX_ASSEMBLY.html	1.57988	0.0200893	0.0898958
GOBP_EPHRIN_RECEPTOR_SIGNALING_PATHWAY	http://www.gsea-msigdb.org/gsea/msigdb/human/geneset/GOBP_EPHRIN_RECEPTOR_SIGNALING_PATHWAY.html	1.57596	0.00972973	0.0927066
GOBP_NEGATIVE_REGULATION_OF_MICROTUBULE_POLYMERIZATION_OR_DEPOLYMERIZATION	http://www.gsea-msigdb.org/gsea/msigdb/human/geneset/GOBP_NEGATIVE_REGULATION_OF_MICROTUBULE_POLYMERIZATION_OR_DEPOLYMERIZATION.html	1.57376	0.0215054	0.0940938
GOBP_INORGANIC_ION_IMPORT_ACROSS_PLASMA_MEMBRANE	http://www.gsea-msigdb.org/gsea/msigdb/human/geneset/GOBP_INORGANIC_ION_IMPORT_ACROSS_PLASMA_MEMBRANE.html	1.57149	0.0170261	0.0956753
GOBP_MITOCHONDRIAL_MEMBRANE_ORGANIZATION	http://www.gsea-msigdb.org/gsea/msigdb/human/geneset/GOBP_MITOCHONDRIAL_MEMBRANE_ORGANIZATION.html	1.57127	0.00421496	0.0954234
GOBP_CALCIUM_ION_TRANSPORT_INTO_CYTOSOL	http://www.gsea-msigdb.org/gsea/msigdb/human/geneset/GOBP_CALCIUM_ION_TRANSPORT_INTO_CYTOSOL.html	1.56994	0.0131868	0.0963249
GOBP_REGULATION_OF_ION_TRANSPORT	http://www.gsea-msigdb.org/gsea/msigdb/human/geneset/GOBP_REGULATION_OF_ION_TRANSPORT.html	1.56945	0	0.0963903
GOBP_FOREBRAIN_CELL_MIGRATION	http://www.gsea-msigdb.org/gsea/msigdb/human/geneset/GOBP_FOREBRAIN_CELL_MIGRATION.html	1.56339	0.01854	0.101388
GOBP_CALCIUM_ION_TRANSPORT	http://www.gsea-msigdb.org/gsea/msigdb/human/geneset/GOBP_CALCIUM_ION_TRANSPORT.html	1.5592	0	0.104979
GOBP_POSITIVE_REGULATION_OF_DENDRITIC_SPINE_DEVELOPMENT	http://www.gsea-msigdb.org/gsea/msigdb/human/geneset/GOBP_POSITIVE_REGULATION_OF_DENDRITIC_SPINE_DEVELOPMENT.html	1.55906	0.0194731	0.10464
GOBP_NUCLEOSIDE_TRIPHOSPHATE_BIOSYNTHETIC_PROCESS	http://www.gsea-msigdb.org/gsea/msigdb/human/geneset/GOBP_NUCLEOSIDE_TRIPHOSPHATE_BIOSYNTHETIC_PROCESS.html	1.55581	0.0284153	0.107272
GOBP_REGULATION_OF_AMYLOID_PRECURSOR_PROTEIN_CATABOLIC_PROCESS	http://www.gsea-msigdb.org/gsea/msigdb/human/geneset/GOBP_REGULATION_OF_AMYLOID_PRECURSOR_PROTEIN_CATABOLIC_PROCESS.html	1.55448	0.021102	0.10812
GOBP_NEGATIVE_REGULATION_OF_LIPID_BIOSYNTHETIC_PROCESS	http://www.gsea-msigdb.org/gsea/msigdb/human/geneset/GOBP_NEGATIVE_REGULATION_OF_LIPID_BIOSYNTHETIC_PROCESS.html	1.55439	0.0295931	0.107747
GOBP_CARDIAC_CHAMBER_MORPHOGENESIS	http://www.gsea-msigdb.org/gsea/msigdb/human/geneset/GOBP_CARDIAC_CHAMBER_MORPHOGENESIS.html	1.55172	0.0167224	0.110028
GOBP_REGULATION_OF_PHOSPHATASE_ACTIVITY	http://www.gsea-msigdb.org/gsea/msigdb/human/geneset/GOBP_REGULATION_OF_PHOSPHATASE_ACTIVITY.html	1.55035	0.00834202	0.110874
GOBP_RECEPTOR_CLUSTERING	http://www.gsea-msigdb.org/gsea/msigdb/human/geneset/GOBP_RECEPTOR_CLUSTERING.html	1.54741	0.0253456	0.113621
GOBP_MICROTUBULE_DEPOLYMERIZATION	http://www.gsea-msigdb.org/gsea/msigdb/human/geneset/GOBP_MICROTUBULE_DEPOLYMERIZATION.html	1.54108	0.0314685	0.119971
GOBP_PHOSPHATIDIC_ACID_METABOLIC_PROCESS	http://www.gsea-msigdb.org/gsea/msigdb/human/geneset/GOBP_PHOSPHATIDIC_ACID_METABOLIC_PROCESS.html	1.54026	0.0270936	0.120302
GOBP_PROTEIN_TARGETING	http://www.gsea-msigdb.org/gsea/msigdb/human/geneset/GOBP_PROTEIN_TARGETING.html	1.53943	0	0.120607
GOBP_REGULATION_OF_ACTIN_FILAMENT_BASED_MOVEMENT	http://www.gsea-msigdb.org/gsea/msigdb/human/geneset/GOBP_REGULATION_OF_ACTIN_FILAMENT_BASED_MOVEMENT.html	1.5393	0.0378049	0.120274
GOBP_PURINE_CONTAINING_COMPOUND_CATABOLIC_PROCESS	http://www.gsea-msigdb.org/gsea/msigdb/human/geneset/GOBP_PURINE_CONTAINING_COMPOUND_CATABOLIC_PROCESS.html	1.53788	0.0367197	0.121256
GOBP_POSITIVE_REGULATION_OF_DENDRITE_MORPHOGENESIS	http://www.gsea-msigdb.org/gsea/msigdb/human/geneset/GOBP_POSITIVE_REGULATION_OF_DENDRITE_MORPHOGENESIS.html	1.53748	0.0388693	0.121196
GOBP_GLUTAMATE_SECRETION	http://www.gsea-msigdb.org/gsea/msigdb/human/geneset/GOBP_GLUTAMATE_SECRETION.html	1.5357	0.0412736	0.122612
GOBP_NEGATIVE_REGULATION_OF_CATION_TRANSMEMBRANE_TRANSPORT	http://www.gsea-msigdb.org/gsea/msigdb/human/geneset/GOBP_NEGATIVE_REGULATION_OF_CATION_TRANSMEMBRANE_TRANSPORT.html	1.53147	0.0226501	0.12663
GOBP_CELLULAR_MONOVALENT_INORGANIC_CATION_HOMEOSTASIS	http://www.gsea-msigdb.org/gsea/msigdb/human/geneset/GOBP_CELLULAR_MONOVALENT_INORGANIC_CATION_HOMEOSTASIS.html	1.53074	0.0273224	0.126984
GOBP_VESICLE_CYTOSKELETAL_TRAFFICKING	http://www.gsea-msigdb.org/gsea/msigdb/human/geneset/GOBP_VESICLE_CYTOSKELETAL_TRAFFICKING.html	1.53049	0.0183697	0.12676
GOBP_CELLULAR_PROTEIN_COMPLEX_DISASSEMBLY	http://www.gsea-msigdb.org/gsea/msigdb/human/geneset/GOBP_CELLULAR_PROTEIN_COMPLEX_DISASSEMBLY.html	1.52994	0.00628931	0.126847
GOBP_POSITIVE_REGULATION_OF_CALCIUM_ION_TRANSPORT_INTO_CYTOSOL	http://www.gsea-msigdb.org/gsea/msigdb/human/geneset/GOBP_POSITIVE_REGULATION_OF_CALCIUM_ION_TRANSPORT_INTO_CYTOSOL.html	1.52994	0.0392157	0.126338
GOBP_AMYLOID_PRECURSOR_PROTEIN_METABOLIC_PROCESS	http://www.gsea-msigdb.org/gsea/msigdb/human/geneset/GOBP_AMYLOID_PRECURSOR_PROTEIN_METABOLIC_PROCESS.html	1.52763	0.0167038	0.128541
GOBP_RESPONSE_TO_CATECHOLAMINE	http://www.gsea-msigdb.org/gsea/msigdb/human/geneset/GOBP_RESPONSE_TO_CATECHOLAMINE.html	1.52524	0.027027	0.130705
GOBP_MEMORY	http://www.gsea-msigdb.org/gsea/msigdb/human/geneset/GOBP_MEMORY.html	1.51928	0.0100334	0.1374
GOBP_POSITIVE_REGULATION_OF_NEUROGENESIS	http://www.gsea-msigdb.org/gsea/msigdb/human/geneset/GOBP_POSITIVE_REGULATION_OF_NEUROGENESIS.html	1.51828	0.00736067	0.138017
GOBP_RAC_PROTEIN_SIGNAL_TRANSDUCTION	http://www.gsea-msigdb.org/gsea/msigdb/human/geneset/GOBP_RAC_PROTEIN_SIGNAL_TRANSDUCTION.html	1.51816	0.0369515	0.1376
GOBP_ADHERENS_JUNCTION_ORGANIZATION	http://www.gsea-msigdb.org/gsea/msigdb/human/geneset/GOBP_ADHERENS_JUNCTION_ORGANIZATION.html	1.51612	0.0325477	0.139347
GOBP_NEURAL_NUCLEUS_DEVELOPMENT	http://www.gsea-msigdb.org/gsea/msigdb/human/geneset/GOBP_NEURAL_NUCLEUS_DEVELOPMENT.html	1.51413	0.0373216	0.141239
GOBP_CYTOSOLIC_CALCIUM_ION_TRANSPORT	http://www.gsea-msigdb.org/gsea/msigdb/human/geneset/GOBP_CYTOSOLIC_CALCIUM_ION_TRANSPORT.html	1.51246	0.0192926	0.142783
GOBP_ACIDIC_AMINO_ACID_TRANSPORT	http://www.gsea-msigdb.org/gsea/msigdb/human/geneset/GOBP_ACIDIC_AMINO_ACID_TRANSPORT.html	1.51209	0.0290828	0.142636
GOBP_POTASSIUM_ION_IMPORT_ACROSS_PLASMA_MEMBRANE	http://www.gsea-msigdb.org/gsea/msigdb/human/geneset/GOBP_POTASSIUM_ION_IMPORT_ACROSS_PLASMA_MEMBRANE.html	1.5119	0.03625	0.142309
GOBP_ATP_BIOSYNTHETIC_PROCESS	http://www.gsea-msigdb.org/gsea/msigdb/human/geneset/GOBP_ATP_BIOSYNTHETIC_PROCESS.html	1.51094	0.0339367	0.142903
GOBP_PROTEIN_POLYMERIZATION	http://www.gsea-msigdb.org/gsea/msigdb/human/geneset/GOBP_PROTEIN_POLYMERIZATION.html	1.51055	0.0101833	0.142859
GOBP_REGULATION_OF_PROTEIN_AUTOPHOSPHORYLATION	http://www.gsea-msigdb.org/gsea/msigdb/human/geneset/GOBP_REGULATION_OF_PROTEIN_AUTOPHOSPHORYLATION.html	1.50908	0.0399516	0.14408
GOBP_CELL_MORPHOGENESIS	http://www.gsea-msigdb.org/gsea/msigdb/human/geneset/GOBP_CELL_MORPHOGENESIS.html	1.50864	0	0.144072
GOBP_RIBONUCLEOPROTEIN_COMPLEX_SUBUNIT_ORGANIZATION	http://www.gsea-msigdb.org/gsea/msigdb/human/geneset/GOBP_RIBONUCLEOPROTEIN_COMPLEX_SUBUNIT_ORGANIZATION.html	1.50844	0.00827301	0.143764
GOBP_MYELOID_LEUKOCYTE_MIGRATION	http://www.gsea-msigdb.org/gsea/msigdb/human/geneset/GOBP_MYELOID_LEUKOCYTE_MIGRATION.html	1.50363	0.0398671	0.149207
GOBP_ESTABLISHMENT_OF_PROTEIN_LOCALIZATION_TO_MITOCHONDRIAL_MEMBRANE	http://www.gsea-msigdb.org/gsea/msigdb/human/geneset/GOBP_ESTABLISHMENT_OF_PROTEIN_LOCALIZATION_TO_MITOCHONDRIAL_MEMBRANE.html	1.50043	0.034565	0.152696
GOBP_CHONDROITIN_SULFATE_PROTEOGLYCAN_METABOLIC_PROCESS	http://www.gsea-msigdb.org/gsea/msigdb/human/geneset/GOBP_CHONDROITIN_SULFATE_PROTEOGLYCAN_METABOLIC_PROCESS.html	1.50043	0.0412121	0.152142
GOBP_NEGATIVE_REGULATION_OF_PROTEIN_POLYMERIZATION	http://www.gsea-msigdb.org/gsea/msigdb/human/geneset/GOBP_NEGATIVE_REGULATION_OF_PROTEIN_POLYMERIZATION.html	1.50041	0.0290179	0.151601
GOBP_ESTABLISHMENT_OF_PROTEIN_LOCALIZATION_TO_ORGANELLE	http://www.gsea-msigdb.org/gsea/msigdb/human/geneset/GOBP_ESTABLISHMENT_OF_PROTEIN_LOCALIZATION_TO_ORGANELLE.html	1.49832	0.001001	0.153625
GOBP_MITOCHONDRION_ORGANIZATION	http://www.gsea-msigdb.org/gsea/msigdb/human/geneset/GOBP_MITOCHONDRION_ORGANIZATION.html	1.49825	0	0.153142
GOBP_ANAPHASE_PROMOTING_COMPLEX_DEPENDENT_CATABOLIC_PROCESS	http://www.gsea-msigdb.org/gsea/msigdb/human/geneset/GOBP_ANAPHASE_PROMOTING_COMPLEX_DEPENDENT_CATABOLIC_PROCESS.html	1.49559	0.0393701	0.156014
GOBP_NCRNA_PROCESSING	http://www.gsea-msigdb.org/gsea/msigdb/human/geneset/GOBP_NCRNA_PROCESSING.html	1.49541	0.00407332	0.155746
GOBP_POSITIVE_REGULATION_OF_CELL_PROJECTION_ORGANIZATION	http://www.gsea-msigdb.org/gsea/msigdb/human/geneset/GOBP_POSITIVE_REGULATION_OF_CELL_PROJECTION_ORGANIZATION.html	1.49436	0.00605449	0.156543
GOBP_POSITIVE_REGULATION_OF_RELEASE_OF_SEQUESTERED_CALCIUM_ION_INTO_CYTOSOL	http://www.gsea-msigdb.org/gsea/msigdb/human/geneset/GOBP_POSITIVE_REGULATION_OF_RELEASE_OF_SEQUESTERED_CALCIUM_ION_INTO_CYTOSOL.html	1.49147	0.0421836	0.159802
GOBP_VESICLE_DOCKING_INVOLVED_IN_EXOCYTOSIS	http://www.gsea-msigdb.org/gsea/msigdb/human/geneset/GOBP_VESICLE_DOCKING_INVOLVED_IN_EXOCYTOSIS.html	1.48986	0.0454545	0.161309
GOBP_ASSOCIATIVE_LEARNING	http://www.gsea-msigdb.org/gsea/msigdb/human/geneset/GOBP_ASSOCIATIVE_LEARNING.html	1.48972	0.0344432	0.160897
GOBP_ATP_SYNTHESIS_COUPLED_PROTON_TRANSPORT	http://www.gsea-msigdb.org/gsea/msigdb/human/geneset/GOBP_ATP_SYNTHESIS_COUPLED_PROTON_TRANSPORT.html	1.48828	0.0401949	0.162428
GOBP_MONOCARBOXYLIC_ACID_TRANSPORT	http://www.gsea-msigdb.org/gsea/msigdb/human/geneset/GOBP_MONOCARBOXYLIC_ACID_TRANSPORT.html	1.4858	0.0140541	0.165163
GOBP_ACTIN_POLYMERIZATION_OR_DEPOLYMERIZATION	http://www.gsea-msigdb.org/gsea/msigdb/human/geneset/GOBP_ACTIN_POLYMERIZATION_OR_DEPOLYMERIZATION.html	1.48475	0.0164609	0.166062
GOBP_TAXIS	http://www.gsea-msigdb.org/gsea/msigdb/human/geneset/GOBP_TAXIS.html	1.48332	0	0.16746
GOBP_REGULATION_OF_NEUROGENESIS	http://www.gsea-msigdb.org/gsea/msigdb/human/geneset/GOBP_REGULATION_OF_NEUROGENESIS.html	1.4815	0.00202634	0.169307
GOBP_CELLULAR_COMPONENT_MAINTENANCE	http://www.gsea-msigdb.org/gsea/msigdb/human/geneset/GOBP_CELLULAR_COMPONENT_MAINTENANCE.html	1.48108	0.0352273	0.169336
GOBP_DOPAMINE_RECEPTOR_SIGNALING_PATHWAY	http://www.gsea-msigdb.org/gsea/msigdb/human/geneset/GOBP_DOPAMINE_RECEPTOR_SIGNALING_PATHWAY.html	1.4809	0.0501792	0.169
GOBP_RESPONSE_TO_INTERLEUKIN_12	http://www.gsea-msigdb.org/gsea/msigdb/human/geneset/GOBP_RESPONSE_TO_INTERLEUKIN_12.html	1.48082	0.0395349	0.168507
GOBP_HEART_PROCESS	http://www.gsea-msigdb.org/gsea/msigdb/human/geneset/GOBP_HEART_PROCESS.html	1.48029	0.0165631	0.168629
GOBP_REGULATION_OF_MUSCLE_CONTRACTION	http://www.gsea-msigdb.org/gsea/msigdb/human/geneset/GOBP_REGULATION_OF_MUSCLE_CONTRACTION.html	1.47854	0.0336323	0.170406
GOBP_DICARBOXYLIC_ACID_TRANSPORT	http://www.gsea-msigdb.org/gsea/msigdb/human/geneset/GOBP_DICARBOXYLIC_ACID_TRANSPORT.html	1.47741	0.0344828	0.17151
GOBP_HEART_MORPHOGENESIS	http://www.gsea-msigdb.org/gsea/msigdb/human/geneset/GOBP_HEART_MORPHOGENESIS.html	1.47699	0.0202559	0.171531
GOBP_GLIAL_CELL_MIGRATION	http://www.gsea-msigdb.org/gsea/msigdb/human/geneset/GOBP_GLIAL_CELL_MIGRATION.html	1.47602	0.0440476	0.172371
GOBP_METAL_ION_TRANSPORT	http://www.gsea-msigdb.org/gsea/msigdb/human/geneset/GOBP_METAL_ION_TRANSPORT.html	1.47477	0.00406504	0.173559
GOBP_REGULATION_OF_CALCIUM_ION_TRANSPORT_INTO_CYTOSOL	http://www.gsea-msigdb.org/gsea/msigdb/human/geneset/GOBP_REGULATION_OF_CALCIUM_ION_TRANSPORT_INTO_CYTOSOL.html	1.4741	0.040724	0.173905
GOBP_LIPID_TRANSLOCATION	http://www.gsea-msigdb.org/gsea/msigdb/human/geneset/GOBP_LIPID_TRANSLOCATION.html	1.47249	0.0579011	0.175637
GOBP_SUBSTANTIA_NIGRA_DEVELOPMENT	http://www.gsea-msigdb.org/gsea/msigdb/human/geneset/GOBP_SUBSTANTIA_NIGRA_DEVELOPMENT.html	1.47109	0.0460829	0.177056
GOBP_RIBONUCLEOSIDE_TRIPHOSPHATE_BIOSYNTHETIC_PROCESS	http://www.gsea-msigdb.org/gsea/msigdb/human/geneset/GOBP_RIBONUCLEOSIDE_TRIPHOSPHATE_BIOSYNTHETIC_PROCESS.html	1.47086	0.0369955	0.176758
GOBP_NEGATIVE_REGULATION_OF_LOCOMOTION	http://www.gsea-msigdb.org/gsea/msigdb/human/geneset/GOBP_NEGATIVE_REGULATION_OF_LOCOMOTION.html	1.47077	0.0144628	0.17629
GOBP_DIVALENT_INORGANIC_CATION_HOMEOSTASIS	http://www.gsea-msigdb.org/gsea/msigdb/human/geneset/GOBP_DIVALENT_INORGANIC_CATION_HOMEOSTASIS.html	1.4703	0.00203459	0.176411
GOBP_PROTEIN_LOCALIZATION_TO_MEMBRANE	http://www.gsea-msigdb.org/gsea/msigdb/human/geneset/GOBP_PROTEIN_LOCALIZATION_TO_MEMBRANE.html	1.47005	0	0.176194
GOBP_NEGATIVE_REGULATION_OF_TRANSMEMBRANE_TRANSPORT	http://www.gsea-msigdb.org/gsea/msigdb/human/geneset/GOBP_NEGATIVE_REGULATION_OF_TRANSMEMBRANE_TRANSPORT.html	1.46888	0.0347144	0.177262
GOBP_CEREBRAL_CORTEX_DEVELOPMENT	http://www.gsea-msigdb.org/gsea/msigdb/human/geneset/GOBP_CEREBRAL_CORTEX_DEVELOPMENT.html	1.46816	0.0228261	0.177669
GOBP_NEGATIVE_REGULATION_OF_TRANSPORTER_ACTIVITY	http://www.gsea-msigdb.org/gsea/msigdb/human/geneset/GOBP_NEGATIVE_REGULATION_OF_TRANSPORTER_ACTIVITY.html	1.46448	0.0467836	0.182542
GOBP_ADENYLATE_CYCLASE_MODULATING_G_PROTEIN_COUPLED_RECEPTOR_SIGNALING_PATHWAY	http://www.gsea-msigdb.org/gsea/msigdb/human/geneset/GOBP_ADENYLATE_CYCLASE_MODULATING_G_PROTEIN_COUPLED_RECEPTOR_SIGNALING_PATHWAY.html	1.46326	0.0357542	0.183682
GOBP_NUCLEAR_TRANSCRIBED_MRNA_CATABOLIC_PROCESS	http://www.gsea-msigdb.org/gsea/msigdb/human/geneset/GOBP_NUCLEAR_TRANSCRIBED_MRNA_CATABOLIC_PROCESS.html	1.46189	0.00510725	0.18508
GOBP_POSITIVE_REGULATION_OF_SODIUM_ION_TRANSPORT	http://www.gsea-msigdb.org/gsea/msigdb/human/geneset/GOBP_POSITIVE_REGULATION_OF_SODIUM_ION_TRANSPORT.html	1.46161	0.0683157	0.1849
GOBP_NCRNA_METABOLIC_PROCESS	http://www.gsea-msigdb.org/gsea/msigdb/human/geneset/GOBP_NCRNA_METABOLIC_PROCESS.html	1.46009	0.00711382	0.186565
GOBP_AMYLOID_PRECURSOR_PROTEIN_CATABOLIC_PROCESS	http://www.gsea-msigdb.org/gsea/msigdb/human/geneset/GOBP_AMYLOID_PRECURSOR_PROTEIN_CATABOLIC_PROCESS.html	1.45841	0.0475638	0.188405
GOBP_LIPID_EXPORT_FROM_CELL	http://www.gsea-msigdb.org/gsea/msigdb/human/geneset/GOBP_LIPID_EXPORT_FROM_CELL.html	1.45731	0.0578035	0.189486
GOBP_RESPONSE_TO_AMYLOID_BETA	http://www.gsea-msigdb.org/gsea/msigdb/human/geneset/GOBP_RESPONSE_TO_AMYLOID_BETA.html	1.45723	0.0521845	0.188993
GOBP_CARDIAC_VENTRICLE_DEVELOPMENT	http://www.gsea-msigdb.org/gsea/msigdb/human/geneset/GOBP_CARDIAC_VENTRICLE_DEVELOPMENT.html	1.45678	0.0441014	0.188989
GOBP_REGULATION_OF_DEPHOSPHORYLATION	http://www.gsea-msigdb.org/gsea/msigdb/human/geneset/GOBP_REGULATION_OF_DEPHOSPHORYLATION.html	1.456	0.0114226	0.189482
GOBP_REGULATION_OF_VESICLE_MEDIATED_TRANSPORT	http://www.gsea-msigdb.org/gsea/msigdb/human/geneset/GOBP_REGULATION_OF_VESICLE_MEDIATED_TRANSPORT.html	1.45482	0.00101112	0.190719
GOBP_METAL_ION_EXPORT	http://www.gsea-msigdb.org/gsea/msigdb/human/geneset/GOBP_METAL_ION_EXPORT.html	1.45478	0.0670038	0.190166
GOBP_REGULATION_OF_MEMBRANE_LIPID_DISTRIBUTION	http://www.gsea-msigdb.org/gsea/msigdb/human/geneset/GOBP_REGULATION_OF_MEMBRANE_LIPID_DISTRIBUTION.html	1.45454	0.0533808	0.18989
GOBP_ENERGY_DERIVATION_BY_OXIDATION_OF_ORGANIC_COMPOUNDS	http://www.gsea-msigdb.org/gsea/msigdb/human/geneset/GOBP_ENERGY_DERIVATION_BY_OXIDATION_OF_ORGANIC_COMPOUNDS.html	1.45431	0.00717213	0.1896
GOBP_EPITHELIAL_CELL_DIFFERENTIATION_INVOLVED_IN_KIDNEY_DEVELOPMENT	http://www.gsea-msigdb.org/gsea/msigdb/human/geneset/GOBP_EPITHELIAL_CELL_DIFFERENTIATION_INVOLVED_IN_KIDNEY_DEVELOPMENT.html	1.45149	0.0581683	0.193191
GOBP_SINGLE_FERTILIZATION	http://www.gsea-msigdb.org/gsea/msigdb/human/geneset/GOBP_SINGLE_FERTILIZATION.html	1.4478	0.061017	0.198071
GOBP_RIBOSOME_ASSEMBLY	http://www.gsea-msigdb.org/gsea/msigdb/human/geneset/GOBP_RIBOSOME_ASSEMBLY.html	1.44659	0.0449827	0.199225
GOBP_HIPPOCAMPUS_DEVELOPMENT	http://www.gsea-msigdb.org/gsea/msigdb/human/geneset/GOBP_HIPPOCAMPUS_DEVELOPMENT.html	1.44581	0.0514874	0.199802
GOBP_NEGATIVE_REGULATION_OF_KINASE_ACTIVITY	http://www.gsea-msigdb.org/gsea/msigdb/human/geneset/GOBP_NEGATIVE_REGULATION_OF_KINASE_ACTIVITY.html	1.44297	0.0144479	0.203544
GOBP_NUCLEOSIDE_MONOPHOSPHATE_METABOLIC_PROCESS	http://www.gsea-msigdb.org/gsea/msigdb/human/geneset/GOBP_NUCLEOSIDE_MONOPHOSPHATE_METABOLIC_PROCESS.html	1.44297	0.0622066	0.202911
GOBP_NUCLEOSIDE_TRIPHOSPHATE_METABOLIC_PROCESS	http://www.gsea-msigdb.org/gsea/msigdb/human/geneset/GOBP_NUCLEOSIDE_TRIPHOSPHATE_METABOLIC_PROCESS.html	1.44087	0.0383795	0.205774
GOBP_NEUROTRANSMITTER_RECEPTOR_TRANSPORT	http://www.gsea-msigdb.org/gsea/msigdb/human/geneset/GOBP_NEUROTRANSMITTER_RECEPTOR_TRANSPORT.html	1.43992	0.0592417	0.206678
GOBP_REGULATION_OF_CELLULAR_COMPONENT_SIZE	http://www.gsea-msigdb.org/gsea/msigdb/human/geneset/GOBP_REGULATION_OF_CELLULAR_COMPONENT_SIZE.html	1.43865	0.0111336	0.20814
GOBP_CELLULAR_ION_HOMEOSTASIS	http://www.gsea-msigdb.org/gsea/msigdb/human/geneset/GOBP_CELLULAR_ION_HOMEOSTASIS.html	1.43741	0.00100301	0.20941
GOBP_MEMBRANE_FUSION	http://www.gsea-msigdb.org/gsea/msigdb/human/geneset/GOBP_MEMBRANE_FUSION.html	1.43694	0.0212993	0.209458
GOBP_REGULATION_OF_CHEMOTAXIS	http://www.gsea-msigdb.org/gsea/msigdb/human/geneset/GOBP_REGULATION_OF_CHEMOTAXIS.html	1.43585	0.0409924	0.210702
GOBP_PROTEIN_CONTAINING_COMPLEX_LOCALIZATION	http://www.gsea-msigdb.org/gsea/msigdb/human/geneset/GOBP_PROTEIN_CONTAINING_COMPLEX_LOCALIZATION.html	1.4338	0.0123077	0.213335
GOBP_BONE_RESORPTION	http://www.gsea-msigdb.org/gsea/msigdb/human/geneset/GOBP_BONE_RESORPTION.html	1.42987	0.0711656	0.219355
GOBP_CEREBRAL_CORTEX_RADIALLY_ORIENTED_CELL_MIGRATION	http://www.gsea-msigdb.org/gsea/msigdb/human/geneset/GOBP_CEREBRAL_CORTEX_RADIALLY_ORIENTED_CELL_MIGRATION.html	1.42889	0.0644769	0.220309
GOBP_NEGATIVE_REGULATION_OF_CATALYTIC_ACTIVITY	http://www.gsea-msigdb.org/gsea/msigdb/human/geneset/GOBP_NEGATIVE_REGULATION_OF_CATALYTIC_ACTIVITY.html	1.42733	0.00300903	0.222345
GOBP_REGULATION_OF_PROTEIN_POLYMERIZATION	http://www.gsea-msigdb.org/gsea/msigdb/human/geneset/GOBP_REGULATION_OF_PROTEIN_POLYMERIZATION.html	1.42719	0.0214724	0.221901
GOBP_HEART_VALVE_DEVELOPMENT	http://www.gsea-msigdb.org/gsea/msigdb/human/geneset/GOBP_HEART_VALVE_DEVELOPMENT.html	1.42451	0.0748538	0.225771
GOBP_NEURON_APOPTOTIC_PROCESS	http://www.gsea-msigdb.org/gsea/msigdb/human/geneset/GOBP_NEURON_APOPTOTIC_PROCESS.html	1.42322	0.0271967	0.227251
GOBP_ORGANOPHOSPHATE_CATABOLIC_PROCESS	http://www.gsea-msigdb.org/gsea/msigdb/human/geneset/GOBP_ORGANOPHOSPHATE_CATABOLIC_PROCESS.html	1.42305	0.0478261	0.226873
GOBP_INSULIN_SECRETION	http://www.gsea-msigdb.org/gsea/msigdb/human/geneset/GOBP_INSULIN_SECRETION.html	1.42176	0.0320856	0.228346
GOBP_REGULATION_OF_UBIQUITIN_PROTEIN_TRANSFERASE_ACTIVITY	http://www.gsea-msigdb.org/gsea/msigdb/human/geneset/GOBP_REGULATION_OF_UBIQUITIN_PROTEIN_TRANSFERASE_ACTIVITY.html	1.42039	0.0833333	0.230171
GOBP_ION_HOMEOSTASIS	http://www.gsea-msigdb.org/gsea/msigdb/human/geneset/GOBP_ION_HOMEOSTASIS.html	1.41928	0.00400802	0.231419
GOBP_TELENCEPHALON_DEVELOPMENT	http://www.gsea-msigdb.org/gsea/msigdb/human/geneset/GOBP_TELENCEPHALON_DEVELOPMENT.html	1.41788	0.0247168	0.233074
GOBP_MITOCHONDRIAL_ATP_SYNTHESIS_COUPLED_PROTON_TRANSPORT	http://www.gsea-msigdb.org/gsea/msigdb/human/geneset/GOBP_MITOCHONDRIAL_ATP_SYNTHESIS_COUPLED_PROTON_TRANSPORT.html	1.41765	0.0782396	0.232795
GOBP_MONOVALENT_INORGANIC_CATION_HOMEOSTASIS	http://www.gsea-msigdb.org/gsea/msigdb/human/geneset/GOBP_MONOVALENT_INORGANIC_CATION_HOMEOSTASIS.html	1.41677	0.0455038	0.233648
GOBP_REGULATION_OF_ANTIGEN_RECEPTOR_MEDIATED_SIGNALING_PATHWAY	http://www.gsea-msigdb.org/gsea/msigdb/human/geneset/GOBP_REGULATION_OF_ANTIGEN_RECEPTOR_MEDIATED_SIGNALING_PATHWAY.html	1.41651	0.0771972	0.233397
GOBP_LEUKOCYTE_CHEMOTAXIS	http://www.gsea-msigdb.org/gsea/msigdb/human/geneset/GOBP_LEUKOCYTE_CHEMOTAXIS.html	1.41517	0.0554324	0.235136
GOBP_CELLULAR_PROTEIN_CONTAINING_COMPLEX_ASSEMBLY	http://www.gsea-msigdb.org/gsea/msigdb/human/geneset/GOBP_CELLULAR_PROTEIN_CONTAINING_COMPLEX_ASSEMBLY.html	1.4125	0	0.239228
GOBP_LIMBIC_SYSTEM_DEVELOPMENT	http://www.gsea-msigdb.org/gsea/msigdb/human/geneset/GOBP_LIMBIC_SYSTEM_DEVELOPMENT.html	1.41176	0.0681564	0.239925
GOBP_REGULATION_OF_FILOPODIUM_ASSEMBLY	http://www.gsea-msigdb.org/gsea/msigdb/human/geneset/GOBP_REGULATION_OF_FILOPODIUM_ASSEMBLY.html	1.40944	0.0711785	0.243577
GOBP_NEGATIVE_REGULATION_OF_TRANSFERASE_ACTIVITY	http://www.gsea-msigdb.org/gsea/msigdb/human/geneset/GOBP_NEGATIVE_REGULATION_OF_TRANSFERASE_ACTIVITY.html	1.4085	0.0264766	0.244564
GOBP_REGULATION_OF_LEUKOCYTE_CHEMOTAXIS	http://www.gsea-msigdb.org/gsea/msigdb/human/geneset/GOBP_REGULATION_OF_LEUKOCYTE_CHEMOTAXIS.html	1.4082	0.0766551	0.244366
GOBP_MICROTUBULE_ORGANIZING_CENTER_ORGANIZATION	http://www.gsea-msigdb.org/gsea/msigdb/human/geneset/GOBP_MICROTUBULE_ORGANIZING_CENTER_ORGANIZATION.html	1.40794	0.0497836	0.244103
GOBP_AUTOPHAGY_OF_MITOCHONDRION	http://www.gsea-msigdb.org/gsea/msigdb/human/geneset/GOBP_AUTOPHAGY_OF_MITOCHONDRION.html	1.40747	0.0647321	0.244335
GOBP_ORGANELLE_DISASSEMBLY	http://www.gsea-msigdb.org/gsea/msigdb/human/geneset/GOBP_ORGANELLE_DISASSEMBLY.html	1.40625	0.0499457	0.245941
GOBP_MONONUCLEAR_CELL_MIGRATION	http://www.gsea-msigdb.org/gsea/msigdb/human/geneset/GOBP_MONONUCLEAR_CELL_MIGRATION.html	1.4058	0.0477778	0.246029
GOBP_CARDIAC_VENTRICLE_MORPHOGENESIS	http://www.gsea-msigdb.org/gsea/msigdb/human/geneset/GOBP_CARDIAC_VENTRICLE_MORPHOGENESIS.html	1.40535	0.0805288	0.246175

## Sheet: CytoTrace_NCIpositive_pathways
NAME	URL	NES	NOM p-val	FDR q-val
GOBP_REGULATION_OF_NEUROTRANSMITTER_RECEPTOR_ACTIVITY	http://www.gsea-msigdb.org/gsea/msigdb/human/geneset/GOBP_REGULATION_OF_NEUROTRANSMITTER_RECEPTOR_ACTIVITY.html	2.77428	0	0
GOBP_REGULATION_OF_NMDA_RECEPTOR_ACTIVITY	http://www.gsea-msigdb.org/gsea/msigdb/human/geneset/GOBP_REGULATION_OF_NMDA_RECEPTOR_ACTIVITY.html	2.63642	0	0
GOBP_REGULATION_OF_CATION_CHANNEL_ACTIVITY	http://www.gsea-msigdb.org/gsea/msigdb/human/geneset/GOBP_REGULATION_OF_CATION_CHANNEL_ACTIVITY.html	2.6158	0	0
GOBP_ACTION_POTENTIAL	http://www.gsea-msigdb.org/gsea/msigdb/human/geneset/GOBP_ACTION_POTENTIAL.html	2.59506	0	0
GOBP_REGULATION_OF_SYNAPTIC_PLASTICITY	http://www.gsea-msigdb.org/gsea/msigdb/human/geneset/GOBP_REGULATION_OF_SYNAPTIC_PLASTICITY.html	2.558	0	0
GOBP_GLUTAMATE_RECEPTOR_SIGNALING_PATHWAY	http://www.gsea-msigdb.org/gsea/msigdb/human/geneset/GOBP_GLUTAMATE_RECEPTOR_SIGNALING_PATHWAY.html	2.5495	0	0
GOBP_SYNAPSE_ASSEMBLY	http://www.gsea-msigdb.org/gsea/msigdb/human/geneset/GOBP_SYNAPSE_ASSEMBLY.html	2.53976	0	0
GOBP_REGULATION_OF_POSTSYNAPTIC_MEMBRANE_POTENTIAL	http://www.gsea-msigdb.org/gsea/msigdb/human/geneset/GOBP_REGULATION_OF_POSTSYNAPTIC_MEMBRANE_POTENTIAL.html	2.51245	0	0
GOBP_REGULATION_OF_SYNAPSE_ASSEMBLY	http://www.gsea-msigdb.org/gsea/msigdb/human/geneset/GOBP_REGULATION_OF_SYNAPSE_ASSEMBLY.html	2.50625	0	0
GOBP_REGULATION_OF_TRANS_SYNAPTIC_SIGNALING	http://www.gsea-msigdb.org/gsea/msigdb/human/geneset/GOBP_REGULATION_OF_TRANS_SYNAPTIC_SIGNALING.html	2.50469	0	0
GOBP_CARDIAC_MUSCLE_CELL_ACTION_POTENTIAL	http://www.gsea-msigdb.org/gsea/msigdb/human/geneset/GOBP_CARDIAC_MUSCLE_CELL_ACTION_POTENTIAL.html	2.50248	0	0
GOBP_REGULATION_OF_MEMBRANE_POTENTIAL	http://www.gsea-msigdb.org/gsea/msigdb/human/geneset/GOBP_REGULATION_OF_MEMBRANE_POTENTIAL.html	2.5002	0	0
GOBP_SYNAPTIC_SIGNALING	http://www.gsea-msigdb.org/gsea/msigdb/human/geneset/GOBP_SYNAPTIC_SIGNALING.html	2.49784	0	0
GOBP_PROTEIN_LOCALIZATION_TO_SYNAPSE	http://www.gsea-msigdb.org/gsea/msigdb/human/geneset/GOBP_PROTEIN_LOCALIZATION_TO_SYNAPSE.html	2.41462	0	0
GOBP_REGULATION_OF_SIGNALING_RECEPTOR_ACTIVITY	http://www.gsea-msigdb.org/gsea/msigdb/human/geneset/GOBP_REGULATION_OF_SIGNALING_RECEPTOR_ACTIVITY.html	2.38999	0	0
GOBP_IONOTROPIC_GLUTAMATE_RECEPTOR_SIGNALING_PATHWAY	http://www.gsea-msigdb.org/gsea/msigdb/human/geneset/GOBP_IONOTROPIC_GLUTAMATE_RECEPTOR_SIGNALING_PATHWAY.html	2.37142	0	0
GOBP_NEUROTRANSMITTER_SECRETION	http://www.gsea-msigdb.org/gsea/msigdb/human/geneset/GOBP_NEUROTRANSMITTER_SECRETION.html	2.36305	0	0
GOBP_POSITIVE_REGULATION_OF_SYNAPSE_ASSEMBLY	http://www.gsea-msigdb.org/gsea/msigdb/human/geneset/GOBP_POSITIVE_REGULATION_OF_SYNAPSE_ASSEMBLY.html	2.34613	0	0
GOBP_REGULATION_OF_NEUROTRANSMITTER_TRANSPORT	http://www.gsea-msigdb.org/gsea/msigdb/human/geneset/GOBP_REGULATION_OF_NEUROTRANSMITTER_TRANSPORT.html	2.33382	0	0
GOBP_CHEMICAL_SYNAPTIC_TRANSMISSION_POSTSYNAPTIC	http://www.gsea-msigdb.org/gsea/msigdb/human/geneset/GOBP_CHEMICAL_SYNAPTIC_TRANSMISSION_POSTSYNAPTIC.html	2.31927	0	0
GOBP_REGULATION_OF_NEURONAL_SYNAPTIC_PLASTICITY	http://www.gsea-msigdb.org/gsea/msigdb/human/geneset/GOBP_REGULATION_OF_NEURONAL_SYNAPTIC_PLASTICITY.html	2.31726	0	0
GOBP_TRANSMISSION_OF_NERVE_IMPULSE	http://www.gsea-msigdb.org/gsea/msigdb/human/geneset/GOBP_TRANSMISSION_OF_NERVE_IMPULSE.html	2.30665	0	0
GOBP_RECEPTOR_LOCALIZATION_TO_SYNAPSE	http://www.gsea-msigdb.org/gsea/msigdb/human/geneset/GOBP_RECEPTOR_LOCALIZATION_TO_SYNAPSE.html	2.29769	0	0
GOBP_SYNAPTIC_VESICLE_EXOCYTOSIS	http://www.gsea-msigdb.org/gsea/msigdb/human/geneset/GOBP_SYNAPTIC_VESICLE_EXOCYTOSIS.html	2.28726	0	0
GOBP_NEGATIVE_CHEMOTAXIS	http://www.gsea-msigdb.org/gsea/msigdb/human/geneset/GOBP_NEGATIVE_CHEMOTAXIS.html	2.28587	0	0
GOBP_PRESYNAPSE_ORGANIZATION	http://www.gsea-msigdb.org/gsea/msigdb/human/geneset/GOBP_PRESYNAPSE_ORGANIZATION.html	2.27659	0	0
GOBP_REGULATION_OF_CATION_TRANSMEMBRANE_TRANSPORT	http://www.gsea-msigdb.org/gsea/msigdb/human/geneset/GOBP_REGULATION_OF_CATION_TRANSMEMBRANE_TRANSPORT.html	2.25673	0	0
GOBP_REGULATION_OF_ACTION_POTENTIAL	http://www.gsea-msigdb.org/gsea/msigdb/human/geneset/GOBP_REGULATION_OF_ACTION_POTENTIAL.html	2.25598	0	0
GOBP_REGULATION_OF_TRANSPORTER_ACTIVITY	http://www.gsea-msigdb.org/gsea/msigdb/human/geneset/GOBP_REGULATION_OF_TRANSPORTER_ACTIVITY.html	2.24319	0	5.58038e-05
GOBP_POSITIVE_REGULATION_OF_CALCIUM_ION_TRANSPORT	http://www.gsea-msigdb.org/gsea/msigdb/human/geneset/GOBP_POSITIVE_REGULATION_OF_CALCIUM_ION_TRANSPORT.html	2.24114	0	5.39436e-05
GOBP_VESICLE_MEDIATED_TRANSPORT_IN_SYNAPSE	http://www.gsea-msigdb.org/gsea/msigdb/human/geneset/GOBP_VESICLE_MEDIATED_TRANSPORT_IN_SYNAPSE.html	2.24065	0	5.22035e-05
GOBP_CARDIAC_MUSCLE_CELL_ACTION_POTENTIAL_INVOLVED_IN_CONTRACTION	http://www.gsea-msigdb.org/gsea/msigdb/human/geneset/GOBP_CARDIAC_MUSCLE_CELL_ACTION_POTENTIAL_INVOLVED_IN_CONTRACTION.html	2.21552	0	7.57113e-05
GOBP_REGULATION_OF_SYNAPTIC_VESICLE_EXOCYTOSIS	http://www.gsea-msigdb.org/gsea/msigdb/human/geneset/GOBP_REGULATION_OF_SYNAPTIC_VESICLE_EXOCYTOSIS.html	2.19789	0	9.81779e-05
GOBP_REGULATION_OF_SYNAPTIC_TRANSMISSION_GLUTAMATERGIC	http://www.gsea-msigdb.org/gsea/msigdb/human/geneset/GOBP_REGULATION_OF_SYNAPTIC_TRANSMISSION_GLUTAMATERGIC.html	2.19388	0	9.52903e-05
GOBP_SYNAPTIC_TRANSMISSION_GLUTAMATERGIC	http://www.gsea-msigdb.org/gsea/msigdb/human/geneset/GOBP_SYNAPTIC_TRANSMISSION_GLUTAMATERGIC.html	2.192	0	9.25677e-05
GOBP_REGULATION_OF_SYNAPSE_STRUCTURE_OR_ACTIVITY	http://www.gsea-msigdb.org/gsea/msigdb/human/geneset/GOBP_REGULATION_OF_SYNAPSE_STRUCTURE_OR_ACTIVITY.html	2.1854	0	0.000112462
GOBP_SYNAPSE_ORGANIZATION	http://www.gsea-msigdb.org/gsea/msigdb/human/geneset/GOBP_SYNAPSE_ORGANIZATION.html	2.18252	0	0.000109422
GOBP_NEUROTRANSMITTER_TRANSPORT	http://www.gsea-msigdb.org/gsea/msigdb/human/geneset/GOBP_NEUROTRANSMITTER_TRANSPORT.html	2.17971	0	0.000106543
GOBP_REGULATION_OF_EXOCYTOSIS	http://www.gsea-msigdb.org/gsea/msigdb/human/geneset/GOBP_REGULATION_OF_EXOCYTOSIS.html	2.17772	0	0.000124498
GOBP_NEURON_PROJECTION_EXTENSION_INVOLVED_IN_NEURON_PROJECTION_GUIDANCE	http://www.gsea-msigdb.org/gsea/msigdb/human/geneset/GOBP_NEURON_PROJECTION_EXTENSION_INVOLVED_IN_NEURON_PROJECTION_GUIDANCE.html	2.16407	0	0.000181949
GOBP_MULTICELLULAR_ORGANISMAL_SIGNALING	http://www.gsea-msigdb.org/gsea/msigdb/human/geneset/GOBP_MULTICELLULAR_ORGANISMAL_SIGNALING.html	2.16278	0	0.000197276
GOBP_CALCIUM_ION_REGULATED_EXOCYTOSIS	http://www.gsea-msigdb.org/gsea/msigdb/human/geneset/GOBP_CALCIUM_ION_REGULATED_EXOCYTOSIS.html	2.15546	0	0.00021176
GOBP_SODIUM_ION_TRANSMEMBRANE_TRANSPORT	http://www.gsea-msigdb.org/gsea/msigdb/human/geneset/GOBP_SODIUM_ION_TRANSMEMBRANE_TRANSPORT.html	2.15534	0	0.000206835
GOBP_REGULATION_OF_TRANSMEMBRANE_TRANSPORT	http://www.gsea-msigdb.org/gsea/msigdb/human/geneset/GOBP_REGULATION_OF_TRANSMEMBRANE_TRANSPORT.html	2.15272	0	0.000238896
GOBP_PROTEIN_LOCALIZATION_TO_CELL_JUNCTION	http://www.gsea-msigdb.org/gsea/msigdb/human/geneset/GOBP_PROTEIN_LOCALIZATION_TO_CELL_JUNCTION.html	2.15156	0	0.000233588
GOBP_REGULATION_OF_HEART_RATE	http://www.gsea-msigdb.org/gsea/msigdb/human/geneset/GOBP_REGULATION_OF_HEART_RATE.html	2.13624	0	0.00031599
GOBP_ATP_SYNTHESIS_COUPLED_ELECTRON_TRANSPORT	http://www.gsea-msigdb.org/gsea/msigdb/human/geneset/GOBP_ATP_SYNTHESIS_COUPLED_ELECTRON_TRANSPORT.html	2.12084	0	0.000377974
GOBP_POSITIVE_REGULATION_OF_SYNAPTIC_TRANSMISSION	http://www.gsea-msigdb.org/gsea/msigdb/human/geneset/GOBP_POSITIVE_REGULATION_OF_SYNAPTIC_TRANSMISSION.html	2.11987	0	0.0003701
GOBP_MEMBRANE_DEPOLARIZATION	http://www.gsea-msigdb.org/gsea/msigdb/human/geneset/GOBP_MEMBRANE_DEPOLARIZATION.html	2.11798	0	0.000362547
GOBP_REGULATION_OF_REGULATED_SECRETORY_PATHWAY	http://www.gsea-msigdb.org/gsea/msigdb/human/geneset/GOBP_REGULATION_OF_REGULATED_SECRETORY_PATHWAY.html	2.11772	0	0.000355296
GOBP_POTASSIUM_ION_TRANSPORT	http://www.gsea-msigdb.org/gsea/msigdb/human/geneset/GOBP_POTASSIUM_ION_TRANSPORT.html	2.10764	0	0.000380064
GOBP_REGULATION_OF_NEUROTRANSMITTER_LEVELS	http://www.gsea-msigdb.org/gsea/msigdb/human/geneset/GOBP_REGULATION_OF_NEUROTRANSMITTER_LEVELS.html	2.10749	0	0.000372755
GOBP_OXIDATIVE_PHOSPHORYLATION	http://www.gsea-msigdb.org/gsea/msigdb/human/geneset/GOBP_OXIDATIVE_PHOSPHORYLATION.html	2.09651	0	0.000365722
GOBP_NEGATIVE_REGULATION_OF_CHEMOTAXIS	http://www.gsea-msigdb.org/gsea/msigdb/human/geneset/GOBP_NEGATIVE_REGULATION_OF_CHEMOTAXIS.html	2.08205	0	0.000567524
GOBP_PROTEIN_LOCALIZATION_TO_POSTSYNAPSE	http://www.gsea-msigdb.org/gsea/msigdb/human/geneset/GOBP_PROTEIN_LOCALIZATION_TO_POSTSYNAPSE.html	2.07676	0	0.000645715
GOBP_REGULATION_OF_NERVOUS_SYSTEM_PROCESS	http://www.gsea-msigdb.org/gsea/msigdb/human/geneset/GOBP_REGULATION_OF_NERVOUS_SYSTEM_PROCESS.html	2.07323	0	0.000648591
GOBP_CELL_COMMUNICATION_INVOLVED_IN_CARDIAC_CONDUCTION	http://www.gsea-msigdb.org/gsea/msigdb/human/geneset/GOBP_CELL_COMMUNICATION_INVOLVED_IN_CARDIAC_CONDUCTION.html	2.06761	0	0.000665834
GOBP_POSITIVE_REGULATION_OF_CALCIUM_ION_TRANSMEMBRANE_TRANSPORTER_ACTIVITY	http://www.gsea-msigdb.org/gsea/msigdb/human/geneset/GOBP_POSITIVE_REGULATION_OF_CALCIUM_ION_TRANSMEMBRANE_TRANSPORTER_ACTIVITY.html	2.06619	0	0.000654354
GOBP_CARDIAC_MUSCLE_CONTRACTION	http://www.gsea-msigdb.org/gsea/msigdb/human/geneset/GOBP_CARDIAC_MUSCLE_CONTRACTION.html	2.06324	0	0.000684521
GOBP_CATION_TRANSMEMBRANE_TRANSPORT	http://www.gsea-msigdb.org/gsea/msigdb/human/geneset/GOBP_CATION_TRANSMEMBRANE_TRANSPORT.html	2.05735	0	0.000726939
GOBP_MODULATION_OF_EXCITATORY_POSTSYNAPTIC_POTENTIAL	http://www.gsea-msigdb.org/gsea/msigdb/human/geneset/GOBP_MODULATION_OF_EXCITATORY_POSTSYNAPTIC_POTENTIAL.html	2.03588	0	0.000992672
GOBP_STRIATED_MUSCLE_CONTRACTION	http://www.gsea-msigdb.org/gsea/msigdb/human/geneset/GOBP_STRIATED_MUSCLE_CONTRACTION.html	2.0347	0	0.00098968
GOBP_POSITIVE_REGULATION_OF_CALCIUM_ION_TRANSMEMBRANE_TRANSPORT	http://www.gsea-msigdb.org/gsea/msigdb/human/geneset/GOBP_POSITIVE_REGULATION_OF_CALCIUM_ION_TRANSMEMBRANE_TRANSPORT.html	2.03432	0	0.000973971
GOBP_POSITIVE_REGULATION_OF_CELL_JUNCTION_ASSEMBLY	http://www.gsea-msigdb.org/gsea/msigdb/human/geneset/GOBP_POSITIVE_REGULATION_OF_CELL_JUNCTION_ASSEMBLY.html	2.02772	0	0.00112241
GOBP_CELL_CELL_ADHESION_VIA_PLASMA_MEMBRANE_ADHESION_MOLECULES	http://www.gsea-msigdb.org/gsea/msigdb/human/geneset/GOBP_CELL_CELL_ADHESION_VIA_PLASMA_MEMBRANE_ADHESION_MOLECULES.html	2.02696	0	0.00111756
GOBP_REGULATION_OF_AXONOGENESIS	http://www.gsea-msigdb.org/gsea/msigdb/human/geneset/GOBP_REGULATION_OF_AXONOGENESIS.html	2.01153	0	0.00144292
GOBP_ACTIN_MEDIATED_CELL_CONTRACTION	http://www.gsea-msigdb.org/gsea/msigdb/human/geneset/GOBP_ACTIN_MEDIATED_CELL_CONTRACTION.html	2.0068	0	0.00149356
GOBP_POSTSYNAPSE_ASSEMBLY	http://www.gsea-msigdb.org/gsea/msigdb/human/geneset/GOBP_POSTSYNAPSE_ASSEMBLY.html	2.0059	0	0.00149526
GOBP_SODIUM_ION_TRANSPORT	http://www.gsea-msigdb.org/gsea/msigdb/human/geneset/GOBP_SODIUM_ION_TRANSPORT.html	1.99841	0	0.00160202
GOBP_POSITIVE_REGULATION_OF_CATION_CHANNEL_ACTIVITY	http://www.gsea-msigdb.org/gsea/msigdb/human/geneset/GOBP_POSITIVE_REGULATION_OF_CATION_CHANNEL_ACTIVITY.html	1.99525	0.00118765	0.00167133
GOBP_LONG_TERM_SYNAPTIC_POTENTIATION	http://www.gsea-msigdb.org/gsea/msigdb/human/geneset/GOBP_LONG_TERM_SYNAPTIC_POTENTIATION.html	1.99476	0.00110619	0.00168195
GOBP_REGULATION_OF_POSTSYNAPSE_ORGANIZATION	http://www.gsea-msigdb.org/gsea/msigdb/human/geneset/GOBP_REGULATION_OF_POSTSYNAPSE_ORGANIZATION.html	1.99231	0	0.00169206
GOBP_NEURON_RECOGNITION	http://www.gsea-msigdb.org/gsea/msigdb/human/geneset/GOBP_NEURON_RECOGNITION.html	1.98481	0	0.00182347
GOBP_INORGANIC_ION_TRANSMEMBRANE_TRANSPORT	http://www.gsea-msigdb.org/gsea/msigdb/human/geneset/GOBP_INORGANIC_ION_TRANSMEMBRANE_TRANSPORT.html	1.96962	0	0.00233298
GOBP_NEGATIVE_REGULATION_OF_AXONOGENESIS	http://www.gsea-msigdb.org/gsea/msigdb/human/geneset/GOBP_NEGATIVE_REGULATION_OF_AXONOGENESIS.html	1.96611	0	0.00243109
GOBP_CARDIAC_MUSCLE_CELL_CONTRACTION	http://www.gsea-msigdb.org/gsea/msigdb/human/geneset/GOBP_CARDIAC_MUSCLE_CELL_CONTRACTION.html	1.94983	0	0.00307878
GOBP_REGULATION_OF_CELL_JUNCTION_ASSEMBLY	http://www.gsea-msigdb.org/gsea/msigdb/human/geneset/GOBP_REGULATION_OF_CELL_JUNCTION_ASSEMBLY.html	1.94629	0	0.00320663
GOBP_PRESYNAPTIC_ENDOCYTOSIS	http://www.gsea-msigdb.org/gsea/msigdb/human/geneset/GOBP_PRESYNAPTIC_ENDOCYTOSIS.html	1.9392	0	0.00347569
GOBP_MITOCHONDRIAL_ELECTRON_TRANSPORT_CYTOCHROME_C_TO_OXYGEN	http://www.gsea-msigdb.org/gsea/msigdb/human/geneset/GOBP_MITOCHONDRIAL_ELECTRON_TRANSPORT_CYTOCHROME_C_TO_OXYGEN.html	1.93717	0	0.00353377
GOBP_REGULATION_OF_STRIATED_MUSCLE_CONTRACTION	http://www.gsea-msigdb.org/gsea/msigdb/human/geneset/GOBP_REGULATION_OF_STRIATED_MUSCLE_CONTRACTION.html	1.93362	0.0023753	0.00371137
GOBP_SYNAPTIC_VESICLE_RECYCLING	http://www.gsea-msigdb.org/gsea/msigdb/human/geneset/GOBP_SYNAPTIC_VESICLE_RECYCLING.html	1.93149	0	0.00376516
GOBP_SYNAPTIC_TRANSMISSION_GABAERGIC	http://www.gsea-msigdb.org/gsea/msigdb/human/geneset/GOBP_SYNAPTIC_TRANSMISSION_GABAERGIC.html	1.93122	0	0.00373908
GOBP_HOMOPHILIC_CELL_ADHESION_VIA_PLASMA_MEMBRANE_ADHESION_MOLECULES	http://www.gsea-msigdb.org/gsea/msigdb/human/geneset/GOBP_HOMOPHILIC_CELL_ADHESION_VIA_PLASMA_MEMBRANE_ADHESION_MOLECULES.html	1.93055	0	0.00371337
GOBP_RESPIRATORY_ELECTRON_TRANSPORT_CHAIN	http://www.gsea-msigdb.org/gsea/msigdb/human/geneset/GOBP_RESPIRATORY_ELECTRON_TRANSPORT_CHAIN.html	1.93014	0	0.00370738
GOBP_SYNAPTIC_VESICLE_LOCALIZATION	http://www.gsea-msigdb.org/gsea/msigdb/human/geneset/GOBP_SYNAPTIC_VESICLE_LOCALIZATION.html	1.92989	0	0.00367338
GOBP_PROTON_TRANSMEMBRANE_TRANSPORT	http://www.gsea-msigdb.org/gsea/msigdb/human/geneset/GOBP_PROTON_TRANSMEMBRANE_TRANSPORT.html	1.92655	0	0.00377143
GOBP_CELL_COMMUNICATION_BY_ELECTRICAL_COUPLING	http://www.gsea-msigdb.org/gsea/msigdb/human/geneset/GOBP_CELL_COMMUNICATION_BY_ELECTRICAL_COUPLING.html	1.92607	0.00120048	0.00376513
GOBP_POSITIVE_REGULATION_OF_NERVOUS_SYSTEM_DEVELOPMENT	http://www.gsea-msigdb.org/gsea/msigdb/human/geneset/GOBP_POSITIVE_REGULATION_OF_NERVOUS_SYSTEM_DEVELOPMENT.html	1.92242	0	0.00391493
GOBP_POSITIVE_REGULATION_OF_CATION_TRANSMEMBRANE_TRANSPORT	http://www.gsea-msigdb.org/gsea/msigdb/human/geneset/GOBP_POSITIVE_REGULATION_OF_CATION_TRANSMEMBRANE_TRANSPORT.html	1.92077	0	0.00397964
GOBP_POSTSYNAPSE_ORGANIZATION	http://www.gsea-msigdb.org/gsea/msigdb/human/geneset/GOBP_POSTSYNAPSE_ORGANIZATION.html	1.91891	0	0.00405173
GOBP_ACTIN_FILAMENT_BASED_MOVEMENT	http://www.gsea-msigdb.org/gsea/msigdb/human/geneset/GOBP_ACTIN_FILAMENT_BASED_MOVEMENT.html	1.91207	0	0.0043705
GOBP_REGULATION_OF_CARDIAC_MUSCLE_CONTRACTION	http://www.gsea-msigdb.org/gsea/msigdb/human/geneset/GOBP_REGULATION_OF_CARDIAC_MUSCLE_CONTRACTION.html	1.90616	0	0.00466506
GOBP_POSTSYNAPTIC_SPECIALIZATION_ORGANIZATION	http://www.gsea-msigdb.org/gsea/msigdb/human/geneset/GOBP_POSTSYNAPTIC_SPECIALIZATION_ORGANIZATION.html	1.90597	0	0.0046149
GOBP_COTRANSLATIONAL_PROTEIN_TARGETING_TO_MEMBRANE	http://www.gsea-msigdb.org/gsea/msigdb/human/geneset/GOBP_COTRANSLATIONAL_PROTEIN_TARGETING_TO_MEMBRANE.html	1.90414	0	0.00466906
GOBP_POSITIVE_REGULATION_OF_TRANSPORTER_ACTIVITY	http://www.gsea-msigdb.org/gsea/msigdb/human/geneset/GOBP_POSITIVE_REGULATION_OF_TRANSPORTER_ACTIVITY.html	1.90199	0	0.004798
GOBP_CATION_TRANSPORT	http://www.gsea-msigdb.org/gsea/msigdb/human/geneset/GOBP_CATION_TRANSPORT.html	1.90156	0	0.0047648
GOBP_POSITIVE_REGULATION_OF_REGULATED_SECRETORY_PATHWAY	http://www.gsea-msigdb.org/gsea/msigdb/human/geneset/GOBP_POSITIVE_REGULATION_OF_REGULATED_SECRETORY_PATHWAY.html	1.90145	0.00120773	0.00472405
GOBP_CALCIUM_MEDIATED_SIGNALING	http://www.gsea-msigdb.org/gsea/msigdb/human/geneset/GOBP_CALCIUM_MEDIATED_SIGNALING.html	1.89781	0	0.00488978
GOBP_NEURON_PROJECTION_ORGANIZATION	http://www.gsea-msigdb.org/gsea/msigdb/human/geneset/GOBP_NEURON_PROJECTION_ORGANIZATION.html	1.89744	0	0.00485661
GOBP_NEUROMUSCULAR_PROCESS	http://www.gsea-msigdb.org/gsea/msigdb/human/geneset/GOBP_NEUROMUSCULAR_PROCESS.html	1.8962	0	0.00488867
GOBP_LONG_TERM_SYNAPTIC_DEPRESSION	http://www.gsea-msigdb.org/gsea/msigdb/human/geneset/GOBP_LONG_TERM_SYNAPTIC_DEPRESSION.html	1.89245	0	0.0051923
GOBP_TRANSLATIONAL_INITIATION	http://www.gsea-msigdb.org/gsea/msigdb/human/geneset/GOBP_TRANSLATIONAL_INITIATION.html	1.89075	0	0.00530769
GOBP_EXOCYTIC_PROCESS	http://www.gsea-msigdb.org/gsea/msigdb/human/geneset/GOBP_EXOCYTIC_PROCESS.html	1.88495	0	0.00567832
GOBP_SECOND_MESSENGER_MEDIATED_SIGNALING	http://www.gsea-msigdb.org/gsea/msigdb/human/geneset/GOBP_SECOND_MESSENGER_MEDIATED_SIGNALING.html	1.88096	0	0.0060734
GOBP_RESPONSE_TO_AMINE	http://www.gsea-msigdb.org/gsea/msigdb/human/geneset/GOBP_RESPONSE_TO_AMINE.html	1.87009	0	0.0070603
GOBP_NEGATIVE_REGULATION_OF_SYNAPTIC_TRANSMISSION	http://www.gsea-msigdb.org/gsea/msigdb/human/geneset/GOBP_NEGATIVE_REGULATION_OF_SYNAPTIC_TRANSMISSION.html	1.8663	0	0.00730487
GOBP_CENTRAL_NERVOUS_SYSTEM_NEURON_DEVELOPMENT	http://www.gsea-msigdb.org/gsea/msigdb/human/geneset/GOBP_CENTRAL_NERVOUS_SYSTEM_NEURON_DEVELOPMENT.html	1.8587	0	0.00806582
GOBP_MITOCHONDRIAL_ELECTRON_TRANSPORT_NADH_TO_UBIQUINONE	http://www.gsea-msigdb.org/gsea/msigdb/human/geneset/GOBP_MITOCHONDRIAL_ELECTRON_TRANSPORT_NADH_TO_UBIQUINONE.html	1.85251	0.00115607	0.00874501
GOBP_REGULATION_OF_VOLTAGE_GATED_CALCIUM_CHANNEL_ACTIVITY	http://www.gsea-msigdb.org/gsea/msigdb/human/geneset/GOBP_REGULATION_OF_VOLTAGE_GATED_CALCIUM_CHANNEL_ACTIVITY.html	1.83122	0.00121212	0.0116093
GOBP_PROTEIN_LOCALIZATION_TO_ENDOPLASMIC_RETICULUM	http://www.gsea-msigdb.org/gsea/msigdb/human/geneset/GOBP_PROTEIN_LOCALIZATION_TO_ENDOPLASMIC_RETICULUM.html	1.83071	0	0.0115767
GOBP_ESTABLISHMENT_OF_PROTEIN_LOCALIZATION_TO_ENDOPLASMIC_RETICULUM	http://www.gsea-msigdb.org/gsea/msigdb/human/geneset/GOBP_ESTABLISHMENT_OF_PROTEIN_LOCALIZATION_TO_ENDOPLASMIC_RETICULUM.html	1.82278	0	0.0125698
GOBP_BEHAVIOR	http://www.gsea-msigdb.org/gsea/msigdb/human/geneset/GOBP_BEHAVIOR.html	1.81895	0	0.0131695
GOBP_NUCLEAR_TRANSCRIBED_MRNA_CATABOLIC_PROCESS_NONSENSE_MEDIATED_DECAY	http://www.gsea-msigdb.org/gsea/msigdb/human/geneset/GOBP_NUCLEAR_TRANSCRIBED_MRNA_CATABOLIC_PROCESS_NONSENSE_MEDIATED_DECAY.html	1.81845	0	0.013167
GOBP_DENDRITIC_SPINE_DEVELOPMENT	http://www.gsea-msigdb.org/gsea/msigdb/human/geneset/GOBP_DENDRITIC_SPINE_DEVELOPMENT.html	1.8142	0.00106496	0.0136887
GOBP_ADULT_BEHAVIOR	http://www.gsea-msigdb.org/gsea/msigdb/human/geneset/GOBP_ADULT_BEHAVIOR.html	1.81307	0.00108108	0.0138011
GOBP_CHLORIDE_TRANSPORT	http://www.gsea-msigdb.org/gsea/msigdb/human/geneset/GOBP_CHLORIDE_TRANSPORT.html	1.81054	0	0.0142931
GOBP_HETEROPHILIC_CELL_CELL_ADHESION_VIA_PLASMA_MEMBRANE_CELL_ADHESION_MOLECULES	http://www.gsea-msigdb.org/gsea/msigdb/human/geneset/GOBP_HETEROPHILIC_CELL_CELL_ADHESION_VIA_PLASMA_MEMBRANE_CELL_ADHESION_MOLECULES.html	1.79993	0.00246002	0.0160794
GOBP_REGULATION_OF_NERVOUS_SYSTEM_DEVELOPMENT	http://www.gsea-msigdb.org/gsea/msigdb/human/geneset/GOBP_REGULATION_OF_NERVOUS_SYSTEM_DEVELOPMENT.html	1.79871	0	0.0161345
GOBP_CELL_JUNCTION_ORGANIZATION	http://www.gsea-msigdb.org/gsea/msigdb/human/geneset/GOBP_CELL_JUNCTION_ORGANIZATION.html	1.79686	0	0.0163576
GOBP_CEREBRAL_CORTEX_CELL_MIGRATION	http://www.gsea-msigdb.org/gsea/msigdb/human/geneset/GOBP_CEREBRAL_CORTEX_CELL_MIGRATION.html	1.79656	0.00481348	0.0162884
GOBP_REGULATION_OF_POTASSIUM_ION_TRANSPORT	http://www.gsea-msigdb.org/gsea/msigdb/human/geneset/GOBP_REGULATION_OF_POTASSIUM_ION_TRANSPORT.html	1.79494	0.00110619	0.0164804
GOBP_REGULATION_OF_NEURON_PROJECTION_DEVELOPMENT	http://www.gsea-msigdb.org/gsea/msigdb/human/geneset/GOBP_REGULATION_OF_NEURON_PROJECTION_DEVELOPMENT.html	1.78755	0	0.0179502
GOBP_NERVOUS_SYSTEM_PROCESS	http://www.gsea-msigdb.org/gsea/msigdb/human/geneset/GOBP_NERVOUS_SYSTEM_PROCESS.html	1.78462	0	0.0183813
GOBP_NEURON_PROJECTION_EXTENSION	http://www.gsea-msigdb.org/gsea/msigdb/human/geneset/GOBP_NEURON_PROJECTION_EXTENSION.html	1.78442	0	0.0182721
GOBP_NEGATIVE_REGULATION_OF_AXON_EXTENSION	http://www.gsea-msigdb.org/gsea/msigdb/human/geneset/GOBP_NEGATIVE_REGULATION_OF_AXON_EXTENSION.html	1.78383	0.00357569	0.0182874
GOBP_CELL_COMMUNICATION_BY_ELECTRICAL_COUPLING_INVOLVED_IN_CARDIAC_CONDUCTION	http://www.gsea-msigdb.org/gsea/msigdb/human/geneset/GOBP_CELL_COMMUNICATION_BY_ELECTRICAL_COUPLING_INVOLVED_IN_CARDIAC_CONDUCTION.html	1.77956	0.00722892	0.0190378
GOBP_CELL_MORPHOGENESIS_INVOLVED_IN_NEURON_DIFFERENTIATION	http://www.gsea-msigdb.org/gsea/msigdb/human/geneset/GOBP_CELL_MORPHOGENESIS_INVOLVED_IN_NEURON_DIFFERENTIATION.html	1.77861	0	0.0190847
GOBP_ELECTRON_TRANSPORT_CHAIN	http://www.gsea-msigdb.org/gsea/msigdb/human/geneset/GOBP_ELECTRON_TRANSPORT_CHAIN.html	1.77742	0	0.019194
GOBP_CELLULAR_RESPIRATION	http://www.gsea-msigdb.org/gsea/msigdb/human/geneset/GOBP_CELLULAR_RESPIRATION.html	1.77688	0	0.0191575
GOBP_SIGNAL_RELEASE	http://www.gsea-msigdb.org/gsea/msigdb/human/geneset/GOBP_SIGNAL_RELEASE.html	1.77127	0	0.0201631
GOBP_REGULATION_OF_DENDRITIC_SPINE_MORPHOGENESIS	http://www.gsea-msigdb.org/gsea/msigdb/human/geneset/GOBP_REGULATION_OF_DENDRITIC_SPINE_MORPHOGENESIS.html	1.77089	0	0.0201135
GOBP_CELL_PART_MORPHOGENESIS	http://www.gsea-msigdb.org/gsea/msigdb/human/geneset/GOBP_CELL_PART_MORPHOGENESIS.html	1.76468	0	0.0214082
GOBP_G_PROTEIN_COUPLED_RECEPTOR_SIGNALING_PATHWAY	http://www.gsea-msigdb.org/gsea/msigdb/human/geneset/GOBP_G_PROTEIN_COUPLED_RECEPTOR_SIGNALING_PATHWAY.html	1.76175	0	0.0219566
GOBP_LEARNING	http://www.gsea-msigdb.org/gsea/msigdb/human/geneset/GOBP_LEARNING.html	1.76166	0	0.0218169
GOBP_NADH_DEHYDROGENASE_COMPLEX_ASSEMBLY	http://www.gsea-msigdb.org/gsea/msigdb/human/geneset/GOBP_NADH_DEHYDROGENASE_COMPLEX_ASSEMBLY.html	1.75904	0.0034642	0.0222102
GOBP_NEURON_PROJECTION_GUIDANCE	http://www.gsea-msigdb.org/gsea/msigdb/human/geneset/GOBP_NEURON_PROJECTION_GUIDANCE.html	1.75724	0	0.0225744
GOBP_REGULATION_OF_SODIUM_ION_TRANSMEMBRANE_TRANSPORTER_ACTIVITY	http://www.gsea-msigdb.org/gsea/msigdb/human/geneset/GOBP_REGULATION_OF_SODIUM_ION_TRANSMEMBRANE_TRANSPORTER_ACTIVITY.html	1.75579	0	0.0227509
GOBP_LOCOMOTORY_BEHAVIOR	http://www.gsea-msigdb.org/gsea/msigdb/human/geneset/GOBP_LOCOMOTORY_BEHAVIOR.html	1.74151	0	0.0266513
GOBP_REGULATION_OF_POTASSIUM_ION_TRANSMEMBRANE_TRANSPORTER_ACTIVITY	http://www.gsea-msigdb.org/gsea/msigdb/human/geneset/GOBP_REGULATION_OF_POTASSIUM_ION_TRANSMEMBRANE_TRANSPORTER_ACTIVITY.html	1.7413	0.00236127	0.0265061
GOBP_REGULATION_OF_SODIUM_ION_TRANSPORT	http://www.gsea-msigdb.org/gsea/msigdb/human/geneset/GOBP_REGULATION_OF_SODIUM_ION_TRANSPORT.html	1.74051	0.00220507	0.0265589
GOBP_INORGANIC_ANION_TRANSPORT	http://www.gsea-msigdb.org/gsea/msigdb/human/geneset/GOBP_INORGANIC_ANION_TRANSPORT.html	1.74031	0.0087146	0.0264678
GOBP_REGULATION_OF_DENDRITIC_SPINE_DEVELOPMENT	http://www.gsea-msigdb.org/gsea/msigdb/human/geneset/GOBP_REGULATION_OF_DENDRITIC_SPINE_DEVELOPMENT.html	1.74025	0.00111982	0.0262871
GOBP_DENDRITIC_SPINE_MORPHOGENESIS	http://www.gsea-msigdb.org/gsea/msigdb/human/geneset/GOBP_DENDRITIC_SPINE_MORPHOGENESIS.html	1.73567	0.00113122	0.0276089
GOBP_REGULATION_OF_DENDRITE_DEVELOPMENT	http://www.gsea-msigdb.org/gsea/msigdb/human/geneset/GOBP_REGULATION_OF_DENDRITE_DEVELOPMENT.html	1.73233	0.00108696	0.0284982
GOBP_CELL_JUNCTION_ASSEMBLY	http://www.gsea-msigdb.org/gsea/msigdb/human/geneset/GOBP_CELL_JUNCTION_ASSEMBLY.html	1.72764	0	0.0298643
GOBP_REGULATION_OF_CALCIUM_ION_TRANSMEMBRANE_TRANSPORTER_ACTIVITY	http://www.gsea-msigdb.org/gsea/msigdb/human/geneset/GOBP_REGULATION_OF_CALCIUM_ION_TRANSMEMBRANE_TRANSPORTER_ACTIVITY.html	1.72497	0.00348432	0.0305656
GOBP_POSITIVE_REGULATION_OF_EXOCYTOSIS	http://www.gsea-msigdb.org/gsea/msigdb/human/geneset/GOBP_POSITIVE_REGULATION_OF_EXOCYTOSIS.html	1.72211	0.00438597	0.0314447
GOBP_TRANSFERRIN_TRANSPORT	http://www.gsea-msigdb.org/gsea/msigdb/human/geneset/GOBP_TRANSFERRIN_TRANSPORT.html	1.72208	0.00603865	0.0312323
GOBP_VIRAL_GENE_EXPRESSION	http://www.gsea-msigdb.org/gsea/msigdb/human/geneset/GOBP_VIRAL_GENE_EXPRESSION.html	1.72105	0	0.0313966
GOBP_RRNA_METABOLIC_PROCESS	http://www.gsea-msigdb.org/gsea/msigdb/human/geneset/GOBP_RRNA_METABOLIC_PROCESS.html	1.71984	0.00104822	0.0316008
GOBP_NEGATIVE_REGULATION_OF_NERVOUS_SYSTEM_DEVELOPMENT	http://www.gsea-msigdb.org/gsea/msigdb/human/geneset/GOBP_NEGATIVE_REGULATION_OF_NERVOUS_SYSTEM_DEVELOPMENT.html	1.71842	0	0.0319037
GOBP_DENDRITE_MORPHOGENESIS	http://www.gsea-msigdb.org/gsea/msigdb/human/geneset/GOBP_DENDRITE_MORPHOGENESIS.html	1.71474	0	0.0328769
GOBP_MEMBRANE_BIOGENESIS	http://www.gsea-msigdb.org/gsea/msigdb/human/geneset/GOBP_MEMBRANE_BIOGENESIS.html	1.71358	0.0059312	0.0330308
GOBP_REGULATION_OF_SYNAPTIC_VESICLE_RECYCLING	http://www.gsea-msigdb.org/gsea/msigdb/human/geneset/GOBP_REGULATION_OF_SYNAPTIC_VESICLE_RECYCLING.html	1.71358	0.00497512	0.0328163
GOBP_REGULATION_OF_CALCIUM_ION_TRANSMEMBRANE_TRANSPORT	http://www.gsea-msigdb.org/gsea/msigdb/human/geneset/GOBP_REGULATION_OF_CALCIUM_ION_TRANSMEMBRANE_TRANSPORT.html	1.712	0	0.0332851
GOBP_PROTEIN_TARGETING_TO_MEMBRANE	http://www.gsea-msigdb.org/gsea/msigdb/human/geneset/GOBP_PROTEIN_TARGETING_TO_MEMBRANE.html	1.71183	0	0.0331388
GOBP_DENDRITE_DEVELOPMENT	http://www.gsea-msigdb.org/gsea/msigdb/human/geneset/GOBP_DENDRITE_DEVELOPMENT.html	1.7101	0	0.0336515
GOBP_ATP_METABOLIC_PROCESS	http://www.gsea-msigdb.org/gsea/msigdb/human/geneset/GOBP_ATP_METABOLIC_PROCESS.html	1.70901	0	0.0338823
GOBP_CELLULAR_COMPONENT_MORPHOGENESIS	http://www.gsea-msigdb.org/gsea/msigdb/human/geneset/GOBP_CELLULAR_COMPONENT_MORPHOGENESIS.html	1.70632	0	0.0346684
GOBP_REGULATION_OF_METAL_ION_TRANSPORT	http://www.gsea-msigdb.org/gsea/msigdb/human/geneset/GOBP_REGULATION_OF_METAL_ION_TRANSPORT.html	1.7054	0	0.0347941
GOBP_CENTRAL_NERVOUS_SYSTEM_NEURON_AXONOGENESIS	http://www.gsea-msigdb.org/gsea/msigdb/human/geneset/GOBP_CENTRAL_NERVOUS_SYSTEM_NEURON_AXONOGENESIS.html	1.70133	0.0120627	0.0362364
GOBP_REGULATION_OF_DENDRITE_MORPHOGENESIS	http://www.gsea-msigdb.org/gsea/msigdb/human/geneset/GOBP_REGULATION_OF_DENDRITE_MORPHOGENESIS.html	1.69686	0.00444939	0.0379097
GOBP_CARDIAC_CONDUCTION	http://www.gsea-msigdb.org/gsea/msigdb/human/geneset/GOBP_CARDIAC_CONDUCTION.html	1.69618	0.00322234	0.0379342
GOBP_DEVELOPMENTAL_GROWTH_INVOLVED_IN_MORPHOGENESIS	http://www.gsea-msigdb.org/gsea/msigdb/human/geneset/GOBP_DEVELOPMENTAL_GROWTH_INVOLVED_IN_MORPHOGENESIS.html	1.69372	0	0.0388252
GOBP_AXON_DEVELOPMENT	http://www.gsea-msigdb.org/gsea/msigdb/human/geneset/GOBP_AXON_DEVELOPMENT.html	1.68495	0	0.0423087
GOBP_PROTEIN_DEPOLYMERIZATION	http://www.gsea-msigdb.org/gsea/msigdb/human/geneset/GOBP_PROTEIN_DEPOLYMERIZATION.html	1.68322	0.00652174	0.0427963
GOBP_AMINE_TRANSPORT	http://www.gsea-msigdb.org/gsea/msigdb/human/geneset/GOBP_AMINE_TRANSPORT.html	1.67806	0.00962696	0.0449265
GOBP_ESTABLISHMENT_OF_PROTEIN_LOCALIZATION_TO_MEMBRANE	http://www.gsea-msigdb.org/gsea/msigdb/human/geneset/GOBP_ESTABLISHMENT_OF_PROTEIN_LOCALIZATION_TO_MEMBRANE.html	1.67642	0	0.0453841
GOBP_REGULATION_OF_RELEASE_OF_SEQUESTERED_CALCIUM_ION_INTO_CYTOSOL	http://www.gsea-msigdb.org/gsea/msigdb/human/geneset/GOBP_REGULATION_OF_RELEASE_OF_SEQUESTERED_CALCIUM_ION_INTO_CYTOSOL.html	1.67619	0.00576037	0.0452206
GOBP_MEMBRANE_REPOLARIZATION	http://www.gsea-msigdb.org/gsea/msigdb/human/geneset/GOBP_MEMBRANE_REPOLARIZATION.html	1.6722	0.00974422	0.0466827
GOBP_REGULATION_OF_HEART_CONTRACTION	http://www.gsea-msigdb.org/gsea/msigdb/human/geneset/GOBP_REGULATION_OF_HEART_CONTRACTION.html	1.67169	0.00315457	0.0466594
GOBP_POSITIVE_REGULATION_OF_AXONOGENESIS	http://www.gsea-msigdb.org/gsea/msigdb/human/geneset/GOBP_POSITIVE_REGULATION_OF_AXONOGENESIS.html	1.67082	0.00323974	0.0467167
GOBP_RIBOSOMAL_LARGE_SUBUNIT_BIOGENESIS	http://www.gsea-msigdb.org/gsea/msigdb/human/geneset/GOBP_RIBOSOMAL_LARGE_SUBUNIT_BIOGENESIS.html	1.66985	0.00925926	0.0469314
GOBP_BIOLOGICAL_PROCESS_INVOLVED_IN_INTRASPECIES_INTERACTION_BETWEEN_ORGANISMS	http://www.gsea-msigdb.org/gsea/msigdb/human/geneset/GOBP_BIOLOGICAL_PROCESS_INVOLVED_IN_INTRASPECIES_INTERACTION_BETWEEN_ORGANISMS.html	1.66815	0.00859951	0.0474311
GOBP_SARCOPLASMIC_RETICULUM_CALCIUM_ION_TRANSPORT	http://www.gsea-msigdb.org/gsea/msigdb/human/geneset/GOBP_SARCOPLASMIC_RETICULUM_CALCIUM_ION_TRANSPORT.html	1.6674	0.0147059	0.0475015
GOBP_DEVELOPMENTAL_CELL_GROWTH	http://www.gsea-msigdb.org/gsea/msigdb/human/geneset/GOBP_DEVELOPMENTAL_CELL_GROWTH.html	1.66268	0	0.0497097
GOBP_REGULATION_OF_BLOOD_CIRCULATION	http://www.gsea-msigdb.org/gsea/msigdb/human/geneset/GOBP_REGULATION_OF_BLOOD_CIRCULATION.html	1.65772	0	0.0519988
GOBP_REGULATION_OF_CYCLASE_ACTIVITY	http://www.gsea-msigdb.org/gsea/msigdb/human/geneset/GOBP_REGULATION_OF_CYCLASE_ACTIVITY.html	1.65444	0.0107399	0.0534958
GOBP_SYNAPTIC_VESICLE_TRANSPORT	http://www.gsea-msigdb.org/gsea/msigdb/human/geneset/GOBP_SYNAPTIC_VESICLE_TRANSPORT.html	1.65373	0.0107784	0.0535761
GOBP_CYTOPLASMIC_TRANSLATION	http://www.gsea-msigdb.org/gsea/msigdb/human/geneset/GOBP_CYTOPLASMIC_TRANSLATION.html	1.65029	0.00105708	0.0552361
GOBP_CALCIUM_ION_TRANSMEMBRANE_TRANSPORT	http://www.gsea-msigdb.org/gsea/msigdb/human/geneset/GOBP_CALCIUM_ION_TRANSMEMBRANE_TRANSPORT.html	1.65005	0.00103093	0.0550331
GOBP_NEGATIVE_REGULATION_OF_CELL_PROJECTION_ORGANIZATION	http://www.gsea-msigdb.org/gsea/msigdb/human/geneset/GOBP_NEGATIVE_REGULATION_OF_CELL_PROJECTION_ORGANIZATION.html	1.64815	0.00103734	0.0558159
GOBP_AXON_EXTENSION	http://www.gsea-msigdb.org/gsea/msigdb/human/geneset/GOBP_AXON_EXTENSION.html	1.64414	0	0.0575819
GOBP_VENTRICULAR_SEPTUM_MORPHOGENESIS	http://www.gsea-msigdb.org/gsea/msigdb/human/geneset/GOBP_VENTRICULAR_SEPTUM_MORPHOGENESIS.html	1.64175	0.0251572	0.0586929
GOBP_REGULATION_OF_SECRETION	http://www.gsea-msigdb.org/gsea/msigdb/human/geneset/GOBP_REGULATION_OF_SECRETION.html	1.64071	0	0.0589645
GOBP_LOCALIZATION_WITHIN_MEMBRANE	http://www.gsea-msigdb.org/gsea/msigdb/human/geneset/GOBP_LOCALIZATION_WITHIN_MEMBRANE.html	1.63545	0.00684151	0.0618905
GOBP_POSITIVE_REGULATION_OF_TRANSMEMBRANE_TRANSPORT	http://www.gsea-msigdb.org/gsea/msigdb/human/geneset/GOBP_POSITIVE_REGULATION_OF_TRANSMEMBRANE_TRANSPORT.html	1.63276	0.00210748	0.0632762
GOBP_FOREBRAIN_GENERATION_OF_NEURONS	http://www.gsea-msigdb.org/gsea/msigdb/human/geneset/GOBP_FOREBRAIN_GENERATION_OF_NEURONS.html	1.63267	0.00932401	0.063008
GOBP_CELL_MORPHOGENESIS_INVOLVED_IN_DIFFERENTIATION	http://www.gsea-msigdb.org/gsea/msigdb/human/geneset/GOBP_CELL_MORPHOGENESIS_INVOLVED_IN_DIFFERENTIATION.html	1.63257	0	0.0627473
GOBP_NEGATIVE_REGULATION_OF_CELL_GROWTH	http://www.gsea-msigdb.org/gsea/msigdb/human/geneset/GOBP_NEGATIVE_REGULATION_OF_CELL_GROWTH.html	1.63046	0.00215517	0.0635842
GOBP_RIBONUCLEOTIDE_CATABOLIC_PROCESS	http://www.gsea-msigdb.org/gsea/msigdb/human/geneset/GOBP_RIBONUCLEOTIDE_CATABOLIC_PROCESS.html	1.6303	0.022113	0.0633401
GOBP_INORGANIC_ANION_TRANSMEMBRANE_TRANSPORT	http://www.gsea-msigdb.org/gsea/msigdb/human/geneset/GOBP_INORGANIC_ANION_TRANSMEMBRANE_TRANSPORT.html	1.62889	0.00798176	0.0639677
GOBP_REGULATION_OF_POSTSYNAPTIC_MEMBRANE_NEUROTRANSMITTER_RECEPTOR_LEVELS	http://www.gsea-msigdb.org/gsea/msigdb/human/geneset/GOBP_REGULATION_OF_POSTSYNAPTIC_MEMBRANE_NEUROTRANSMITTER_RECEPTOR_LEVELS.html	1.62789	0.01812	0.0642459
GOBP_REGULATION_OF_SODIUM_ION_TRANSMEMBRANE_TRANSPORT	http://www.gsea-msigdb.org/gsea/msigdb/human/geneset/GOBP_REGULATION_OF_SODIUM_ION_TRANSMEMBRANE_TRANSPORT.html	1.62657	0.010274	0.0648204
GOBP_PEPTIDYL_CYSTEINE_MODIFICATION	http://www.gsea-msigdb.org/gsea/msigdb/human/geneset/GOBP_PEPTIDYL_CYSTEINE_MODIFICATION.html	1.62626	0.015873	0.0646994
GOBP_NEGATIVE_REGULATION_OF_DEPHOSPHORYLATION	http://www.gsea-msigdb.org/gsea/msigdb/human/geneset/GOBP_NEGATIVE_REGULATION_OF_DEPHOSPHORYLATION.html	1.6261	0.00547046	0.0644848
GOBP_REGULATION_OF_SYSTEM_PROCESS	http://www.gsea-msigdb.org/gsea/msigdb/human/geneset/GOBP_REGULATION_OF_SYSTEM_PROCESS.html	1.62596	0.00101317	0.0642065
GOBP_VESICLE_DOCKING	http://www.gsea-msigdb.org/gsea/msigdb/human/geneset/GOBP_VESICLE_DOCKING.html	1.62501	0.00688073	0.0645425
GOBP_NEGATIVE_REGULATION_OF_NEURON_PROJECTION_DEVELOPMENT	http://www.gsea-msigdb.org/gsea/msigdb/human/geneset/GOBP_NEGATIVE_REGULATION_OF_NEURON_PROJECTION_DEVELOPMENT.html	1.62376	0.00532481	0.0650204
GOBP_AEROBIC_RESPIRATION	http://www.gsea-msigdb.org/gsea/msigdb/human/geneset/GOBP_AEROBIC_RESPIRATION.html	1.62195	0.00441014	0.0658564
GOBP_COGNITION	http://www.gsea-msigdb.org/gsea/msigdb/human/geneset/GOBP_COGNITION.html	1.61929	0	0.0672576
GOBP_CAMP_MEDIATED_SIGNALING	http://www.gsea-msigdb.org/gsea/msigdb/human/geneset/GOBP_CAMP_MEDIATED_SIGNALING.html	1.61801	0.00918485	0.0678113
GOBP_RIBONUCLEOPROTEIN_COMPLEX_BIOGENESIS	http://www.gsea-msigdb.org/gsea/msigdb/human/geneset/GOBP_RIBONUCLEOPROTEIN_COMPLEX_BIOGENESIS.html	1.6156	0	0.0691776
GOBP_RIBOSOME_BIOGENESIS	http://www.gsea-msigdb.org/gsea/msigdb/human/geneset/GOBP_RIBOSOME_BIOGENESIS.html	1.61293	0.00104493	0.0707647
GOBP_CALCIUM_ION_IMPORT	http://www.gsea-msigdb.org/gsea/msigdb/human/geneset/GOBP_CALCIUM_ION_IMPORT.html	1.60732	0.0114286	0.0745231
GOBP_CYCLIC_NUCLEOTIDE_MEDIATED_SIGNALING	http://www.gsea-msigdb.org/gsea/msigdb/human/geneset/GOBP_CYCLIC_NUCLEOTIDE_MEDIATED_SIGNALING.html	1.60633	0.00986842	0.0748976
GOBP_POSITIVE_REGULATION_OF_NEURON_APOPTOTIC_PROCESS	http://www.gsea-msigdb.org/gsea/msigdb/human/geneset/GOBP_POSITIVE_REGULATION_OF_NEURON_APOPTOTIC_PROCESS.html	1.60551	0.0132371	0.0751204
GOBP_CENTRAL_NERVOUS_SYSTEM_NEURON_DIFFERENTIATION	http://www.gsea-msigdb.org/gsea/msigdb/human/geneset/GOBP_CENTRAL_NERVOUS_SYSTEM_NEURON_DIFFERENTIATION.html	1.60456	0	0.0754646
GOBP_INNER_MITOCHONDRIAL_MEMBRANE_ORGANIZATION	http://www.gsea-msigdb.org/gsea/msigdb/human/geneset/GOBP_INNER_MITOCHONDRIAL_MEMBRANE_ORGANIZATION.html	1.59851	0.0140515	0.0798569
GOBP_REGULATION_OF_CELL_PROJECTION_ORGANIZATION	http://www.gsea-msigdb.org/gsea/msigdb/human/geneset/GOBP_REGULATION_OF_CELL_PROJECTION_ORGANIZATION.html	1.59573	0	0.0816962
GOBP_VESICLE_LOCALIZATION	http://www.gsea-msigdb.org/gsea/msigdb/human/geneset/GOBP_VESICLE_LOCALIZATION.html	1.59536	0.00207469	0.0815499
GOBP_CRISTAE_FORMATION	http://www.gsea-msigdb.org/gsea/msigdb/human/geneset/GOBP_CRISTAE_FORMATION.html	1.5947	0.0158151	0.0817282
GOBP_ADULT_LOCOMOTORY_BEHAVIOR	http://www.gsea-msigdb.org/gsea/msigdb/human/geneset/GOBP_ADULT_LOCOMOTORY_BEHAVIOR.html	1.59443	0.0168919	0.0815447
GOBP_SEMAPHORIN_PLEXIN_SIGNALING_PATHWAY	http://www.gsea-msigdb.org/gsea/msigdb/human/geneset/GOBP_SEMAPHORIN_PLEXIN_SIGNALING_PATHWAY.html	1.58952	0.0183599	0.0853574
GOBP_CELL_RECOGNITION	http://www.gsea-msigdb.org/gsea/msigdb/human/geneset/GOBP_CELL_RECOGNITION.html	1.58793	0.0110865	0.0861418
GOBP_HETEROTYPIC_CELL_CELL_ADHESION	http://www.gsea-msigdb.org/gsea/msigdb/human/geneset/GOBP_HETEROTYPIC_CELL_CELL_ADHESION.html	1.58731	0.022113	0.0861726
GOBP_DENDRITE_EXTENSION	http://www.gsea-msigdb.org/gsea/msigdb/human/geneset/GOBP_DENDRITE_EXTENSION.html	1.58674	0.0182039	0.0862662
GOBP_RIBOSOMAL_SMALL_SUBUNIT_BIOGENESIS	http://www.gsea-msigdb.org/gsea/msigdb/human/geneset/GOBP_RIBOSOMAL_SMALL_SUBUNIT_BIOGENESIS.html	1.5838	0.0161663	0.0882162
GOBP_REGULATION_OF_CYTOSOLIC_CALCIUM_ION_CONCENTRATION	http://www.gsea-msigdb.org/gsea/msigdb/human/geneset/GOBP_REGULATION_OF_CYTOSOLIC_CALCIUM_ION_CONCENTRATION.html	1.58337	0.00208117	0.0881928
GOBP_PALLIUM_DEVELOPMENT	http://www.gsea-msigdb.org/gsea/msigdb/human/geneset/GOBP_PALLIUM_DEVELOPMENT.html	1.58216	0.00533618	0.0888178
GOBP_REGULATION_OF_EXTENT_OF_CELL_GROWTH	http://www.gsea-msigdb.org/gsea/msigdb/human/geneset/GOBP_REGULATION_OF_EXTENT_OF_CELL_GROWTH.html	1.58157	0.00644468	0.0888756
GOBP_MITOCHONDRIAL_RESPIRATORY_CHAIN_COMPLEX_ASSEMBLY	http://www.gsea-msigdb.org/gsea/msigdb/human/geneset/GOBP_MITOCHONDRIAL_RESPIRATORY_CHAIN_COMPLEX_ASSEMBLY.html	1.57988	0.0200893	0.0898958
GOBP_EPHRIN_RECEPTOR_SIGNALING_PATHWAY	http://www.gsea-msigdb.org/gsea/msigdb/human/geneset/GOBP_EPHRIN_RECEPTOR_SIGNALING_PATHWAY.html	1.57596	0.00972973	0.0927066
GOBP_NEGATIVE_REGULATION_OF_MICROTUBULE_POLYMERIZATION_OR_DEPOLYMERIZATION	http://www.gsea-msigdb.org/gsea/msigdb/human/geneset/GOBP_NEGATIVE_REGULATION_OF_MICROTUBULE_POLYMERIZATION_OR_DEPOLYMERIZATION.html	1.57376	0.0215054	0.0940938
GOBP_INORGANIC_ION_IMPORT_ACROSS_PLASMA_MEMBRANE	http://www.gsea-msigdb.org/gsea/msigdb/human/geneset/GOBP_INORGANIC_ION_IMPORT_ACROSS_PLASMA_MEMBRANE.html	1.57149	0.0170261	0.0956753
GOBP_MITOCHONDRIAL_MEMBRANE_ORGANIZATION	http://www.gsea-msigdb.org/gsea/msigdb/human/geneset/GOBP_MITOCHONDRIAL_MEMBRANE_ORGANIZATION.html	1.57127	0.00421496	0.0954234
GOBP_CALCIUM_ION_TRANSPORT_INTO_CYTOSOL	http://www.gsea-msigdb.org/gsea/msigdb/human/geneset/GOBP_CALCIUM_ION_TRANSPORT_INTO_CYTOSOL.html	1.56994	0.0131868	0.0963249
GOBP_REGULATION_OF_ION_TRANSPORT	http://www.gsea-msigdb.org/gsea/msigdb/human/geneset/GOBP_REGULATION_OF_ION_TRANSPORT.html	1.56945	0	0.0963903
GOBP_FOREBRAIN_CELL_MIGRATION	http://www.gsea-msigdb.org/gsea/msigdb/human/geneset/GOBP_FOREBRAIN_CELL_MIGRATION.html	1.56339	0.01854	0.101388
GOBP_CALCIUM_ION_TRANSPORT	http://www.gsea-msigdb.org/gsea/msigdb/human/geneset/GOBP_CALCIUM_ION_TRANSPORT.html	1.5592	0	0.104979
GOBP_POSITIVE_REGULATION_OF_DENDRITIC_SPINE_DEVELOPMENT	http://www.gsea-msigdb.org/gsea/msigdb/human/geneset/GOBP_POSITIVE_REGULATION_OF_DENDRITIC_SPINE_DEVELOPMENT.html	1.55906	0.0194731	0.10464
GOBP_NUCLEOSIDE_TRIPHOSPHATE_BIOSYNTHETIC_PROCESS	http://www.gsea-msigdb.org/gsea/msigdb/human/geneset/GOBP_NUCLEOSIDE_TRIPHOSPHATE_BIOSYNTHETIC_PROCESS.html	1.55581	0.0284153	0.107272
GOBP_REGULATION_OF_AMYLOID_PRECURSOR_PROTEIN_CATABOLIC_PROCESS	http://www.gsea-msigdb.org/gsea/msigdb/human/geneset/GOBP_REGULATION_OF_AMYLOID_PRECURSOR_PROTEIN_CATABOLIC_PROCESS.html	1.55448	0.021102	0.10812
GOBP_NEGATIVE_REGULATION_OF_LIPID_BIOSYNTHETIC_PROCESS	http://www.gsea-msigdb.org/gsea/msigdb/human/geneset/GOBP_NEGATIVE_REGULATION_OF_LIPID_BIOSYNTHETIC_PROCESS.html	1.55439	0.0295931	0.107747
GOBP_CARDIAC_CHAMBER_MORPHOGENESIS	http://www.gsea-msigdb.org/gsea/msigdb/human/geneset/GOBP_CARDIAC_CHAMBER_MORPHOGENESIS.html	1.55172	0.0167224	0.110028
GOBP_REGULATION_OF_PHOSPHATASE_ACTIVITY	http://www.gsea-msigdb.org/gsea/msigdb/human/geneset/GOBP_REGULATION_OF_PHOSPHATASE_ACTIVITY.html	1.55035	0.00834202	0.110874
GOBP_RECEPTOR_CLUSTERING	http://www.gsea-msigdb.org/gsea/msigdb/human/geneset/GOBP_RECEPTOR_CLUSTERING.html	1.54741	0.0253456	0.113621
GOBP_MICROTUBULE_DEPOLYMERIZATION	http://www.gsea-msigdb.org/gsea/msigdb/human/geneset/GOBP_MICROTUBULE_DEPOLYMERIZATION.html	1.54108	0.0314685	0.119971
GOBP_PHOSPHATIDIC_ACID_METABOLIC_PROCESS	http://www.gsea-msigdb.org/gsea/msigdb/human/geneset/GOBP_PHOSPHATIDIC_ACID_METABOLIC_PROCESS.html	1.54026	0.0270936	0.120302
GOBP_PROTEIN_TARGETING	http://www.gsea-msigdb.org/gsea/msigdb/human/geneset/GOBP_PROTEIN_TARGETING.html	1.53943	0	0.120607
GOBP_REGULATION_OF_ACTIN_FILAMENT_BASED_MOVEMENT	http://www.gsea-msigdb.org/gsea/msigdb/human/geneset/GOBP_REGULATION_OF_ACTIN_FILAMENT_BASED_MOVEMENT.html	1.5393	0.0378049	0.120274
GOBP_PURINE_CONTAINING_COMPOUND_CATABOLIC_PROCESS	http://www.gsea-msigdb.org/gsea/msigdb/human/geneset/GOBP_PURINE_CONTAINING_COMPOUND_CATABOLIC_PROCESS.html	1.53788	0.0367197	0.121256
GOBP_POSITIVE_REGULATION_OF_DENDRITE_MORPHOGENESIS	http://www.gsea-msigdb.org/gsea/msigdb/human/geneset/GOBP_POSITIVE_REGULATION_OF_DENDRITE_MORPHOGENESIS.html	1.53748	0.0388693	0.121196
GOBP_GLUTAMATE_SECRETION	http://www.gsea-msigdb.org/gsea/msigdb/human/geneset/GOBP_GLUTAMATE_SECRETION.html	1.5357	0.0412736	0.122612
GOBP_NEGATIVE_REGULATION_OF_CATION_TRANSMEMBRANE_TRANSPORT	http://www.gsea-msigdb.org/gsea/msigdb/human/geneset/GOBP_NEGATIVE_REGULATION_OF_CATION_TRANSMEMBRANE_TRANSPORT.html	1.53147	0.0226501	0.12663
GOBP_CELLULAR_MONOVALENT_INORGANIC_CATION_HOMEOSTASIS	http://www.gsea-msigdb.org/gsea/msigdb/human/geneset/GOBP_CELLULAR_MONOVALENT_INORGANIC_CATION_HOMEOSTASIS.html	1.53074	0.0273224	0.126984
GOBP_VESICLE_CYTOSKELETAL_TRAFFICKING	http://www.gsea-msigdb.org/gsea/msigdb/human/geneset/GOBP_VESICLE_CYTOSKELETAL_TRAFFICKING.html	1.53049	0.0183697	0.12676
GOBP_CELLULAR_PROTEIN_COMPLEX_DISASSEMBLY	http://www.gsea-msigdb.org/gsea/msigdb/human/geneset/GOBP_CELLULAR_PROTEIN_COMPLEX_DISASSEMBLY.html	1.52994	0.00628931	0.126847
GOBP_POSITIVE_REGULATION_OF_CALCIUM_ION_TRANSPORT_INTO_CYTOSOL	http://www.gsea-msigdb.org/gsea/msigdb/human/geneset/GOBP_POSITIVE_REGULATION_OF_CALCIUM_ION_TRANSPORT_INTO_CYTOSOL.html	1.52994	0.0392157	0.126338
GOBP_AMYLOID_PRECURSOR_PROTEIN_METABOLIC_PROCESS	http://www.gsea-msigdb.org/gsea/msigdb/human/geneset/GOBP_AMYLOID_PRECURSOR_PROTEIN_METABOLIC_PROCESS.html	1.52763	0.0167038	0.128541
GOBP_RESPONSE_TO_CATECHOLAMINE	http://www.gsea-msigdb.org/gsea/msigdb/human/geneset/GOBP_RESPONSE_TO_CATECHOLAMINE.html	1.52524	0.027027	0.130705
GOBP_MEMORY	http://www.gsea-msigdb.org/gsea/msigdb/human/geneset/GOBP_MEMORY.html	1.51928	0.0100334	0.1374
GOBP_POSITIVE_REGULATION_OF_NEUROGENESIS	http://www.gsea-msigdb.org/gsea/msigdb/human/geneset/GOBP_POSITIVE_REGULATION_OF_NEUROGENESIS.html	1.51828	0.00736067	0.138017
GOBP_RAC_PROTEIN_SIGNAL_TRANSDUCTION	http://www.gsea-msigdb.org/gsea/msigdb/human/geneset/GOBP_RAC_PROTEIN_SIGNAL_TRANSDUCTION.html	1.51816	0.0369515	0.1376
GOBP_ADHERENS_JUNCTION_ORGANIZATION	http://www.gsea-msigdb.org/gsea/msigdb/human/geneset/GOBP_ADHERENS_JUNCTION_ORGANIZATION.html	1.51612	0.0325477	0.139347
GOBP_NEURAL_NUCLEUS_DEVELOPMENT	http://www.gsea-msigdb.org/gsea/msigdb/human/geneset/GOBP_NEURAL_NUCLEUS_DEVELOPMENT.html	1.51413	0.0373216	0.141239
GOBP_CYTOSOLIC_CALCIUM_ION_TRANSPORT	http://www.gsea-msigdb.org/gsea/msigdb/human/geneset/GOBP_CYTOSOLIC_CALCIUM_ION_TRANSPORT.html	1.51246	0.0192926	0.142783
GOBP_ACIDIC_AMINO_ACID_TRANSPORT	http://www.gsea-msigdb.org/gsea/msigdb/human/geneset/GOBP_ACIDIC_AMINO_ACID_TRANSPORT.html	1.51209	0.0290828	0.142636
GOBP_POTASSIUM_ION_IMPORT_ACROSS_PLASMA_MEMBRANE	http://www.gsea-msigdb.org/gsea/msigdb/human/geneset/GOBP_POTASSIUM_ION_IMPORT_ACROSS_PLASMA_MEMBRANE.html	1.5119	0.03625	0.142309
GOBP_ATP_BIOSYNTHETIC_PROCESS	http://www.gsea-msigdb.org/gsea/msigdb/human/geneset/GOBP_ATP_BIOSYNTHETIC_PROCESS.html	1.51094	0.0339367	0.142903
GOBP_PROTEIN_POLYMERIZATION	http://www.gsea-msigdb.org/gsea/msigdb/human/geneset/GOBP_PROTEIN_POLYMERIZATION.html	1.51055	0.0101833	0.142859
GOBP_REGULATION_OF_PROTEIN_AUTOPHOSPHORYLATION	http://www.gsea-msigdb.org/gsea/msigdb/human/geneset/GOBP_REGULATION_OF_PROTEIN_AUTOPHOSPHORYLATION.html	1.50908	0.0399516	0.14408
GOBP_CELL_MORPHOGENESIS	http://www.gsea-msigdb.org/gsea/msigdb/human/geneset/GOBP_CELL_MORPHOGENESIS.html	1.50864	0	0.144072
GOBP_RIBONUCLEOPROTEIN_COMPLEX_SUBUNIT_ORGANIZATION	http://www.gsea-msigdb.org/gsea/msigdb/human/geneset/GOBP_RIBONUCLEOPROTEIN_COMPLEX_SUBUNIT_ORGANIZATION.html	1.50844	0.00827301	0.143764
GOBP_MYELOID_LEUKOCYTE_MIGRATION	http://www.gsea-msigdb.org/gsea/msigdb/human/geneset/GOBP_MYELOID_LEUKOCYTE_MIGRATION.html	1.50363	0.0398671	0.149207
GOBP_ESTABLISHMENT_OF_PROTEIN_LOCALIZATION_TO_MITOCHONDRIAL_MEMBRANE	http://www.gsea-msigdb.org/gsea/msigdb/human/geneset/GOBP_ESTABLISHMENT_OF_PROTEIN_LOCALIZATION_TO_MITOCHONDRIAL_MEMBRANE.html	1.50043	0.034565	0.152696
GOBP_CHONDROITIN_SULFATE_PROTEOGLYCAN_METABOLIC_PROCESS	http://www.gsea-msigdb.org/gsea/msigdb/human/geneset/GOBP_CHONDROITIN_SULFATE_PROTEOGLYCAN_METABOLIC_PROCESS.html	1.50043	0.0412121	0.152142
GOBP_NEGATIVE_REGULATION_OF_PROTEIN_POLYMERIZATION	http://www.gsea-msigdb.org/gsea/msigdb/human/geneset/GOBP_NEGATIVE_REGULATION_OF_PROTEIN_POLYMERIZATION.html	1.50041	0.0290179	0.151601
GOBP_ESTABLISHMENT_OF_PROTEIN_LOCALIZATION_TO_ORGANELLE	http://www.gsea-msigdb.org/gsea/msigdb/human/geneset/GOBP_ESTABLISHMENT_OF_PROTEIN_LOCALIZATION_TO_ORGANELLE.html	1.49832	0.001001	0.153625
GOBP_MITOCHONDRION_ORGANIZATION	http://www.gsea-msigdb.org/gsea/msigdb/human/geneset/GOBP_MITOCHONDRION_ORGANIZATION.html	1.49825	0	0.153142
GOBP_ANAPHASE_PROMOTING_COMPLEX_DEPENDENT_CATABOLIC_PROCESS	http://www.gsea-msigdb.org/gsea/msigdb/human/geneset/GOBP_ANAPHASE_PROMOTING_COMPLEX_DEPENDENT_CATABOLIC_PROCESS.html	1.49559	0.0393701	0.156014
GOBP_NCRNA_PROCESSING	http://www.gsea-msigdb.org/gsea/msigdb/human/geneset/GOBP_NCRNA_PROCESSING.html	1.49541	0.00407332	0.155746
GOBP_POSITIVE_REGULATION_OF_CELL_PROJECTION_ORGANIZATION	http://www.gsea-msigdb.org/gsea/msigdb/human/geneset/GOBP_POSITIVE_REGULATION_OF_CELL_PROJECTION_ORGANIZATION.html	1.49436	0.00605449	0.156543
GOBP_POSITIVE_REGULATION_OF_RELEASE_OF_SEQUESTERED_CALCIUM_ION_INTO_CYTOSOL	http://www.gsea-msigdb.org/gsea/msigdb/human/geneset/GOBP_POSITIVE_REGULATION_OF_RELEASE_OF_SEQUESTERED_CALCIUM_ION_INTO_CYTOSOL.html	1.49147	0.0421836	0.159802
GOBP_VESICLE_DOCKING_INVOLVED_IN_EXOCYTOSIS	http://www.gsea-msigdb.org/gsea/msigdb/human/geneset/GOBP_VESICLE_DOCKING_INVOLVED_IN_EXOCYTOSIS.html	1.48986	0.0454545	0.161309
GOBP_ASSOCIATIVE_LEARNING	http://www.gsea-msigdb.org/gsea/msigdb/human/geneset/GOBP_ASSOCIATIVE_LEARNING.html	1.48972	0.0344432	0.160897
GOBP_ATP_SYNTHESIS_COUPLED_PROTON_TRANSPORT	http://www.gsea-msigdb.org/gsea/msigdb/human/geneset/GOBP_ATP_SYNTHESIS_COUPLED_PROTON_TRANSPORT.html	1.48828	0.0401949	0.162428
GOBP_MONOCARBOXYLIC_ACID_TRANSPORT	http://www.gsea-msigdb.org/gsea/msigdb/human/geneset/GOBP_MONOCARBOXYLIC_ACID_TRANSPORT.html	1.4858	0.0140541	0.165163
GOBP_ACTIN_POLYMERIZATION_OR_DEPOLYMERIZATION	http://www.gsea-msigdb.org/gsea/msigdb/human/geneset/GOBP_ACTIN_POLYMERIZATION_OR_DEPOLYMERIZATION.html	1.48475	0.0164609	0.166062
GOBP_TAXIS	http://www.gsea-msigdb.org/gsea/msigdb/human/geneset/GOBP_TAXIS.html	1.48332	0	0.16746
GOBP_REGULATION_OF_NEUROGENESIS	http://www.gsea-msigdb.org/gsea/msigdb/human/geneset/GOBP_REGULATION_OF_NEUROGENESIS.html	1.4815	0.00202634	0.169307
GOBP_CELLULAR_COMPONENT_MAINTENANCE	http://www.gsea-msigdb.org/gsea/msigdb/human/geneset/GOBP_CELLULAR_COMPONENT_MAINTENANCE.html	1.48108	0.0352273	0.169336
GOBP_DOPAMINE_RECEPTOR_SIGNALING_PATHWAY	http://www.gsea-msigdb.org/gsea/msigdb/human/geneset/GOBP_DOPAMINE_RECEPTOR_SIGNALING_PATHWAY.html	1.4809	0.0501792	0.169
GOBP_RESPONSE_TO_INTERLEUKIN_12	http://www.gsea-msigdb.org/gsea/msigdb/human/geneset/GOBP_RESPONSE_TO_INTERLEUKIN_12.html	1.48082	0.0395349	0.168507
GOBP_HEART_PROCESS	http://www.gsea-msigdb.org/gsea/msigdb/human/geneset/GOBP_HEART_PROCESS.html	1.48029	0.0165631	0.168629
GOBP_REGULATION_OF_MUSCLE_CONTRACTION	http://www.gsea-msigdb.org/gsea/msigdb/human/geneset/GOBP_REGULATION_OF_MUSCLE_CONTRACTION.html	1.47854	0.0336323	0.170406
GOBP_DICARBOXYLIC_ACID_TRANSPORT	http://www.gsea-msigdb.org/gsea/msigdb/human/geneset/GOBP_DICARBOXYLIC_ACID_TRANSPORT.html	1.47741	0.0344828	0.17151
GOBP_HEART_MORPHOGENESIS	http://www.gsea-msigdb.org/gsea/msigdb/human/geneset/GOBP_HEART_MORPHOGENESIS.html	1.47699	0.0202559	0.171531
GOBP_GLIAL_CELL_MIGRATION	http://www.gsea-msigdb.org/gsea/msigdb/human/geneset/GOBP_GLIAL_CELL_MIGRATION.html	1.47602	0.0440476	0.172371
GOBP_METAL_ION_TRANSPORT	http://www.gsea-msigdb.org/gsea/msigdb/human/geneset/GOBP_METAL_ION_TRANSPORT.html	1.47477	0.00406504	0.173559
GOBP_REGULATION_OF_CALCIUM_ION_TRANSPORT_INTO_CYTOSOL	http://www.gsea-msigdb.org/gsea/msigdb/human/geneset/GOBP_REGULATION_OF_CALCIUM_ION_TRANSPORT_INTO_CYTOSOL.html	1.4741	0.040724	0.173905
GOBP_LIPID_TRANSLOCATION	http://www.gsea-msigdb.org/gsea/msigdb/human/geneset/GOBP_LIPID_TRANSLOCATION.html	1.47249	0.0579011	0.175637
GOBP_SUBSTANTIA_NIGRA_DEVELOPMENT	http://www.gsea-msigdb.org/gsea/msigdb/human/geneset/GOBP_SUBSTANTIA_NIGRA_DEVELOPMENT.html	1.47109	0.0460829	0.177056
GOBP_RIBONUCLEOSIDE_TRIPHOSPHATE_BIOSYNTHETIC_PROCESS	http://www.gsea-msigdb.org/gsea/msigdb/human/geneset/GOBP_RIBONUCLEOSIDE_TRIPHOSPHATE_BIOSYNTHETIC_PROCESS.html	1.47086	0.0369955	0.176758
GOBP_NEGATIVE_REGULATION_OF_LOCOMOTION	http://www.gsea-msigdb.org/gsea/msigdb/human/geneset/GOBP_NEGATIVE_REGULATION_OF_LOCOMOTION.html	1.47077	0.0144628	0.17629
GOBP_DIVALENT_INORGANIC_CATION_HOMEOSTASIS	http://www.gsea-msigdb.org/gsea/msigdb/human/geneset/GOBP_DIVALENT_INORGANIC_CATION_HOMEOSTASIS.html	1.4703	0.00203459	0.176411
GOBP_PROTEIN_LOCALIZATION_TO_MEMBRANE	http://www.gsea-msigdb.org/gsea/msigdb/human/geneset/GOBP_PROTEIN_LOCALIZATION_TO_MEMBRANE.html	1.47005	0	0.176194
GOBP_NEGATIVE_REGULATION_OF_TRANSMEMBRANE_TRANSPORT	http://www.gsea-msigdb.org/gsea/msigdb/human/geneset/GOBP_NEGATIVE_REGULATION_OF_TRANSMEMBRANE_TRANSPORT.html	1.46888	0.0347144	0.177262
GOBP_CEREBRAL_CORTEX_DEVELOPMENT	http://www.gsea-msigdb.org/gsea/msigdb/human/geneset/GOBP_CEREBRAL_CORTEX_DEVELOPMENT.html	1.46816	0.0228261	0.177669
GOBP_NEGATIVE_REGULATION_OF_TRANSPORTER_ACTIVITY	http://www.gsea-msigdb.org/gsea/msigdb/human/geneset/GOBP_NEGATIVE_REGULATION_OF_TRANSPORTER_ACTIVITY.html	1.46448	0.0467836	0.182542
GOBP_ADENYLATE_CYCLASE_MODULATING_G_PROTEIN_COUPLED_RECEPTOR_SIGNALING_PATHWAY	http://www.gsea-msigdb.org/gsea/msigdb/human/geneset/GOBP_ADENYLATE_CYCLASE_MODULATING_G_PROTEIN_COUPLED_RECEPTOR_SIGNALING_PATHWAY.html	1.46326	0.0357542	0.183682
GOBP_NUCLEAR_TRANSCRIBED_MRNA_CATABOLIC_PROCESS	http://www.gsea-msigdb.org/gsea/msigdb/human/geneset/GOBP_NUCLEAR_TRANSCRIBED_MRNA_CATABOLIC_PROCESS.html	1.46189	0.00510725	0.18508
GOBP_POSITIVE_REGULATION_OF_SODIUM_ION_TRANSPORT	http://www.gsea-msigdb.org/gsea/msigdb/human/geneset/GOBP_POSITIVE_REGULATION_OF_SODIUM_ION_TRANSPORT.html	1.46161	0.0683157	0.1849
GOBP_NCRNA_METABOLIC_PROCESS	http://www.gsea-msigdb.org/gsea/msigdb/human/geneset/GOBP_NCRNA_METABOLIC_PROCESS.html	1.46009	0.00711382	0.186565
GOBP_AMYLOID_PRECURSOR_PROTEIN_CATABOLIC_PROCESS	http://www.gsea-msigdb.org/gsea/msigdb/human/geneset/GOBP_AMYLOID_PRECURSOR_PROTEIN_CATABOLIC_PROCESS.html	1.45841	0.0475638	0.188405
GOBP_LIPID_EXPORT_FROM_CELL	http://www.gsea-msigdb.org/gsea/msigdb/human/geneset/GOBP_LIPID_EXPORT_FROM_CELL.html	1.45731	0.0578035	0.189486
GOBP_RESPONSE_TO_AMYLOID_BETA	http://www.gsea-msigdb.org/gsea/msigdb/human/geneset/GOBP_RESPONSE_TO_AMYLOID_BETA.html	1.45723	0.0521845	0.188993
GOBP_CARDIAC_VENTRICLE_DEVELOPMENT	http://www.gsea-msigdb.org/gsea/msigdb/human/geneset/GOBP_CARDIAC_VENTRICLE_DEVELOPMENT.html	1.45678	0.0441014	0.188989
GOBP_REGULATION_OF_DEPHOSPHORYLATION	http://www.gsea-msigdb.org/gsea/msigdb/human/geneset/GOBP_REGULATION_OF_DEPHOSPHORYLATION.html	1.456	0.0114226	0.189482
GOBP_REGULATION_OF_VESICLE_MEDIATED_TRANSPORT	http://www.gsea-msigdb.org/gsea/msigdb/human/geneset/GOBP_REGULATION_OF_VESICLE_MEDIATED_TRANSPORT.html	1.45482	0.00101112	0.190719
GOBP_METAL_ION_EXPORT	http://www.gsea-msigdb.org/gsea/msigdb/human/geneset/GOBP_METAL_ION_EXPORT.html	1.45478	0.0670038	0.190166
GOBP_REGULATION_OF_MEMBRANE_LIPID_DISTRIBUTION	http://www.gsea-msigdb.org/gsea/msigdb/human/geneset/GOBP_REGULATION_OF_MEMBRANE_LIPID_DISTRIBUTION.html	1.45454	0.0533808	0.18989
GOBP_ENERGY_DERIVATION_BY_OXIDATION_OF_ORGANIC_COMPOUNDS	http://www.gsea-msigdb.org/gsea/msigdb/human/geneset/GOBP_ENERGY_DERIVATION_BY_OXIDATION_OF_ORGANIC_COMPOUNDS.html	1.45431	0.00717213	0.1896
GOBP_EPITHELIAL_CELL_DIFFERENTIATION_INVOLVED_IN_KIDNEY_DEVELOPMENT	http://www.gsea-msigdb.org/gsea/msigdb/human/geneset/GOBP_EPITHELIAL_CELL_DIFFERENTIATION_INVOLVED_IN_KIDNEY_DEVELOPMENT.html	1.45149	0.0581683	0.193191
GOBP_SINGLE_FERTILIZATION	http://www.gsea-msigdb.org/gsea/msigdb/human/geneset/GOBP_SINGLE_FERTILIZATION.html	1.4478	0.061017	0.198071
GOBP_RIBOSOME_ASSEMBLY	http://www.gsea-msigdb.org/gsea/msigdb/human/geneset/GOBP_RIBOSOME_ASSEMBLY.html	1.44659	0.0449827	0.199225
GOBP_HIPPOCAMPUS_DEVELOPMENT	http://www.gsea-msigdb.org/gsea/msigdb/human/geneset/GOBP_HIPPOCAMPUS_DEVELOPMENT.html	1.44581	0.0514874	0.199802
GOBP_NEGATIVE_REGULATION_OF_KINASE_ACTIVITY	http://www.gsea-msigdb.org/gsea/msigdb/human/geneset/GOBP_NEGATIVE_REGULATION_OF_KINASE_ACTIVITY.html	1.44297	0.0144479	0.203544
GOBP_NUCLEOSIDE_MONOPHOSPHATE_METABOLIC_PROCESS	http://www.gsea-msigdb.org/gsea/msigdb/human/geneset/GOBP_NUCLEOSIDE_MONOPHOSPHATE_METABOLIC_PROCESS.html	1.44297	0.0622066	0.202911
GOBP_NUCLEOSIDE_TRIPHOSPHATE_METABOLIC_PROCESS	http://www.gsea-msigdb.org/gsea/msigdb/human/geneset/GOBP_NUCLEOSIDE_TRIPHOSPHATE_METABOLIC_PROCESS.html	1.44087	0.0383795	0.205774
GOBP_NEUROTRANSMITTER_RECEPTOR_TRANSPORT	http://www.gsea-msigdb.org/gsea/msigdb/human/geneset/GOBP_NEUROTRANSMITTER_RECEPTOR_TRANSPORT.html	1.43992	0.0592417	0.206678
GOBP_REGULATION_OF_CELLULAR_COMPONENT_SIZE	http://www.gsea-msigdb.org/gsea/msigdb/human/geneset/GOBP_REGULATION_OF_CELLULAR_COMPONENT_SIZE.html	1.43865	0.0111336	0.20814
GOBP_CELLULAR_ION_HOMEOSTASIS	http://www.gsea-msigdb.org/gsea/msigdb/human/geneset/GOBP_CELLULAR_ION_HOMEOSTASIS.html	1.43741	0.00100301	0.20941
GOBP_MEMBRANE_FUSION	http://www.gsea-msigdb.org/gsea/msigdb/human/geneset/GOBP_MEMBRANE_FUSION.html	1.43694	0.0212993	0.209458
GOBP_REGULATION_OF_CHEMOTAXIS	http://www.gsea-msigdb.org/gsea/msigdb/human/geneset/GOBP_REGULATION_OF_CHEMOTAXIS.html	1.43585	0.0409924	0.210702
GOBP_PROTEIN_CONTAINING_COMPLEX_LOCALIZATION	http://www.gsea-msigdb.org/gsea/msigdb/human/geneset/GOBP_PROTEIN_CONTAINING_COMPLEX_LOCALIZATION.html	1.4338	0.0123077	0.213335
GOBP_BONE_RESORPTION	http://www.gsea-msigdb.org/gsea/msigdb/human/geneset/GOBP_BONE_RESORPTION.html	1.42987	0.0711656	0.219355
GOBP_CEREBRAL_CORTEX_RADIALLY_ORIENTED_CELL_MIGRATION	http://www.gsea-msigdb.org/gsea/msigdb/human/geneset/GOBP_CEREBRAL_CORTEX_RADIALLY_ORIENTED_CELL_MIGRATION.html	1.42889	0.0644769	0.220309
GOBP_NEGATIVE_REGULATION_OF_CATALYTIC_ACTIVITY	http://www.gsea-msigdb.org/gsea/msigdb/human/geneset/GOBP_NEGATIVE_REGULATION_OF_CATALYTIC_ACTIVITY.html	1.42733	0.00300903	0.222345
GOBP_REGULATION_OF_PROTEIN_POLYMERIZATION	http://www.gsea-msigdb.org/gsea/msigdb/human/geneset/GOBP_REGULATION_OF_PROTEIN_POLYMERIZATION.html	1.42719	0.0214724	0.221901
GOBP_HEART_VALVE_DEVELOPMENT	http://www.gsea-msigdb.org/gsea/msigdb/human/geneset/GOBP_HEART_VALVE_DEVELOPMENT.html	1.42451	0.0748538	0.225771
GOBP_NEURON_APOPTOTIC_PROCESS	http://www.gsea-msigdb.org/gsea/msigdb/human/geneset/GOBP_NEURON_APOPTOTIC_PROCESS.html	1.42322	0.0271967	0.227251
GOBP_ORGANOPHOSPHATE_CATABOLIC_PROCESS	http://www.gsea-msigdb.org/gsea/msigdb/human/geneset/GOBP_ORGANOPHOSPHATE_CATABOLIC_PROCESS.html	1.42305	0.0478261	0.226873
GOBP_INSULIN_SECRETION	http://www.gsea-msigdb.org/gsea/msigdb/human/geneset/GOBP_INSULIN_SECRETION.html	1.42176	0.0320856	0.228346
GOBP_REGULATION_OF_UBIQUITIN_PROTEIN_TRANSFERASE_ACTIVITY	http://www.gsea-msigdb.org/gsea/msigdb/human/geneset/GOBP_REGULATION_OF_UBIQUITIN_PROTEIN_TRANSFERASE_ACTIVITY.html	1.42039	0.0833333	0.230171
GOBP_ION_HOMEOSTASIS	http://www.gsea-msigdb.org/gsea/msigdb/human/geneset/GOBP_ION_HOMEOSTASIS.html	1.41928	0.00400802	0.231419
GOBP_TELENCEPHALON_DEVELOPMENT	http://www.gsea-msigdb.org/gsea/msigdb/human/geneset/GOBP_TELENCEPHALON_DEVELOPMENT.html	1.41788	0.0247168	0.233074
GOBP_MITOCHONDRIAL_ATP_SYNTHESIS_COUPLED_PROTON_TRANSPORT	http://www.gsea-msigdb.org/gsea/msigdb/human/geneset/GOBP_MITOCHONDRIAL_ATP_SYNTHESIS_COUPLED_PROTON_TRANSPORT.html	1.41765	0.0782396	0.232795
GOBP_MONOVALENT_INORGANIC_CATION_HOMEOSTASIS	http://www.gsea-msigdb.org/gsea/msigdb/human/geneset/GOBP_MONOVALENT_INORGANIC_CATION_HOMEOSTASIS.html	1.41677	0.0455038	0.233648
GOBP_REGULATION_OF_ANTIGEN_RECEPTOR_MEDIATED_SIGNALING_PATHWAY	http://www.gsea-msigdb.org/gsea/msigdb/human/geneset/GOBP_REGULATION_OF_ANTIGEN_RECEPTOR_MEDIATED_SIGNALING_PATHWAY.html	1.41651	0.0771972	0.233397
GOBP_LEUKOCYTE_CHEMOTAXIS	http://www.gsea-msigdb.org/gsea/msigdb/human/geneset/GOBP_LEUKOCYTE_CHEMOTAXIS.html	1.41517	0.0554324	0.235136
GOBP_CELLULAR_PROTEIN_CONTAINING_COMPLEX_ASSEMBLY	http://www.gsea-msigdb.org/gsea/msigdb/human/geneset/GOBP_CELLULAR_PROTEIN_CONTAINING_COMPLEX_ASSEMBLY.html	1.4125	0	0.239228
GOBP_LIMBIC_SYSTEM_DEVELOPMENT	http://www.gsea-msigdb.org/gsea/msigdb/human/geneset/GOBP_LIMBIC_SYSTEM_DEVELOPMENT.html	1.41176	0.0681564	0.239925
GOBP_REGULATION_OF_FILOPODIUM_ASSEMBLY	http://www.gsea-msigdb.org/gsea/msigdb/human/geneset/GOBP_REGULATION_OF_FILOPODIUM_ASSEMBLY.html	1.40944	0.0711785	0.243577
GOBP_NEGATIVE_REGULATION_OF_TRANSFERASE_ACTIVITY	http://www.gsea-msigdb.org/gsea/msigdb/human/geneset/GOBP_NEGATIVE_REGULATION_OF_TRANSFERASE_ACTIVITY.html	1.4085	0.0264766	0.244564
GOBP_REGULATION_OF_LEUKOCYTE_CHEMOTAXIS	http://www.gsea-msigdb.org/gsea/msigdb/human/geneset/GOBP_REGULATION_OF_LEUKOCYTE_CHEMOTAXIS.html	1.4082	0.0766551	0.244366
GOBP_MICROTUBULE_ORGANIZING_CENTER_ORGANIZATION	http://www.gsea-msigdb.org/gsea/msigdb/human/geneset/GOBP_MICROTUBULE_ORGANIZING_CENTER_ORGANIZATION.html	1.40794	0.0497836	0.244103
GOBP_AUTOPHAGY_OF_MITOCHONDRION	http://www.gsea-msigdb.org/gsea/msigdb/human/geneset/GOBP_AUTOPHAGY_OF_MITOCHONDRION.html	1.40747	0.0647321	0.244335
GOBP_ORGANELLE_DISASSEMBLY	http://www.gsea-msigdb.org/gsea/msigdb/human/geneset/GOBP_ORGANELLE_DISASSEMBLY.html	1.40625	0.0499457	0.245941
GOBP_MONONUCLEAR_CELL_MIGRATION	http://www.gsea-msigdb.org/gsea/msigdb/human/geneset/GOBP_MONONUCLEAR_CELL_MIGRATION.html	1.4058	0.0477778	0.246029
GOBP_CARDIAC_VENTRICLE_MORPHOGENESIS	http://www.gsea-msigdb.org/gsea/msigdb/human/geneset/GOBP_CARDIAC_VENTRICLE_MORPHOGENESIS.html	1.40535	0.0805288	0.246175
