# Supplementary material for: A roadmap to human hippocampal neurogenesis in adulthood, aging and AD.
Source: Research Square preprint supplement (doi:10.21203/rs.3.rs-4469965/v1), 2024-05-30
Supplement: Supplementary file 7 [file 9256dab8c31524946739ad26.xlsx]

## Sheet: signif_summary
Contrast	Cluster	Total	Up	Down
Diagnosis	GABA_neurons	219	0	0
1.YC/0.HA	GABA_neurons	6	5	1
2.MCI/0.HA	GABA_neurons	1	0	1
3.AD/0.HA	GABA_neurons	87	8	79
2.MCI/1.YC	GABA_neurons	91	5	86
3.AD/1.YC	GABA_neurons	1659	39	1620
3.AD/2.MCI	GABA_neurons	2	2	0
CODE	Acronym in manuscript
HA	NCI
YC	YA
MCI	MCI
AD	AD

## Sheet: signif
ID	Promoter (2 kb upstream to 2 kb downstream)	Gene Body	log2FC	log2CPM	PValue	QValue	Contrast	Cluster
chr1:629634-630496					1.27241e-08	0.000520346	Diagnosis	GABA_neurons
chr1:1692390-1693344	ENSG00000189339_SLC35E2B,0	ENSG00000189339_SLC35E2B,0			3.74344e-05	0.0883193	Diagnosis	GABA_neurons
chr1:2384683-2385535		ENSG00000116151_MORN1,6172			8.38012e-06	0.0640632	Diagnosis	GABA_neurons
chr1:3900300-3901059	ENSG00000198912_C1orf174,-7;ENSG00000236423_LINC01134,0	ENSG00000236423_LINC01134,0			0.000182243	0.176956	Diagnosis	GABA_neurons
chr1:16366870-16367733		ENSG00000055070_SZRD1,14295			1.76437e-05	0.0656746	Diagnosis	GABA_neurons
chr1:16904557-16905455	ENSG00000272426_BX284668.6,0	ENSG00000272426_BX284668.6,0;ENSG00000058453_CROCC,164284			1.16951e-05	0.0640632	Diagnosis	GABA_neurons
chr1:20255425-20256296					7.74329e-05	0.12025	Diagnosis	GABA_neurons
chr1:22451544-22452365		ENSG00000184677_ZBTB40,22706			0.000193187	0.183404	Diagnosis	GABA_neurons
chr1:26695341-26696164	ENSG00000260063_AL512408.1,-1210	ENSG00000117713_ARID1A,2105			7.21416e-05	0.115945	Diagnosis	GABA_neurons
chr1:32072624-32073532	ENSG00000203325_AL445248.1,0;ENSG00000121775_TMEM39B,593	ENSG00000203325_AL445248.1,0;ENSG00000121775_TMEM39B,593			8.62345e-05	0.127371	Diagnosis	GABA_neurons
chr1:37690147-37691018	ENSG00000134690_CDCA8,-1463;ENSG00000116922_C1orf109,1231	ENSG00000116922_C1orf109,1231			6.54958e-05	0.114825	Diagnosis	GABA_neurons
chr1:39892873-39893689					0.00034061	0.225828	Diagnosis	GABA_neurons
chr1:41394922-41395767					0.000109402	0.139248	Diagnosis	GABA_neurons
chr1:45206029-45206852		ENSG00000162415_ZSWIM5,99357			0.000134773	0.14896	Diagnosis	GABA_neurons
chr1:50981557-50982401					0.000300936	0.220307	Diagnosis	GABA_neurons
chr1:77978793-77979696	ENSG00000162613_FUBP1,0;ENSG00000162616_DNAJB4,0;ENSG00000137960_GIPC2,0	ENSG00000162613_FUBP1,0;ENSG00000162616_DNAJB4,0;ENSG00000137960_GIPC2,0			6.19899e-05	0.11351	Diagnosis	GABA_neurons
chr1:110338694-110339511	ENSG00000227963_RBM15-AS1,0;ENSG00000162775_RBM15,188	ENSG00000227963_RBM15-AS1,0;ENSG00000162775_RBM15,188			0.000424251	0.242684	Diagnosis	GABA_neurons
chr1:153670693-153671602	ENSG00000143621_ILF2,0	ENSG00000143621_ILF2,0			1.13379e-05	0.0640632	Diagnosis	GABA_neurons
chr1:153727454-153728360	ENSG00000143624_INTS3,0	ENSG00000143624_INTS3,0			0.000400368	0.234379	Diagnosis	GABA_neurons
chr1:155244305-155245218	ENSG00000177628_GBA,0	ENSG00000177628_GBA,0			4.44842e-05	0.0939774	Diagnosis	GABA_neurons
chr1:159141443-159142303		ENSG00000163568_AIM2,4793			0.000334697	0.225828	Diagnosis	GABA_neurons
chr1:161132290-161133210	ENSG00000158796_DEDD,0	ENSG00000158796_DEDD,0			9.3003e-05	0.128579	Diagnosis	GABA_neurons
chr1:179882020-179882939	ENSG00000143337_TOR1AIP1,0;ENSG00000272906_AL353708.3,0	ENSG00000272906_AL353708.3,0;ENSG00000143337_TOR1AIP1,0			2.21261e-06	0.0471826	Diagnosis	GABA_neurons
chr1:192951710-192952589		ENSG00000285280_AL390957.1,5124			0.000382906	0.230677	Diagnosis	GABA_neurons
chr1:206001211-206002065	ENSG00000276600_RAB7B,1396	ENSG00000276600_RAB7B,1396			7.17951e-05	0.115945	Diagnosis	GABA_neurons
chr1:212284854-212285749	ENSG00000066027_PPP2R5A,0	ENSG00000066027_PPP2R5A,0			8.47633e-05	0.127371	Diagnosis	GABA_neurons
chr1:222712281-222713026	ENSG00000162819_BROX,0;ENSG00000186063_AIDA,184	ENSG00000162819_BROX,0;ENSG00000186063_AIDA,184			1.28681e-05	0.0641074	Diagnosis	GABA_neurons
chr1:246817524-246818400					2.30752e-06	0.0471826	Diagnosis	GABA_neurons
chr10:67763933-67764805					1.20101e-05	0.0640632	Diagnosis	GABA_neurons
chr10:72273424-72274229	ENSG00000168209_DDIT4,0;ENSG00000269926_DDIT4-AS1,1751	ENSG00000168209_DDIT4,0			0.000103449	0.136374	Diagnosis	GABA_neurons
chr10:72726849-72727740		ENSG00000156026_MCU,34718			0.000342723	0.225828	Diagnosis	GABA_neurons
chr10:75401738-75402488	ENSG00000270087_AC010997.3,-492;ENSG00000165655_ZNF503,0;ENSG00000237149_ZNF503-AS2,219	ENSG00000165655_ZNF503,0;ENSG00000237149_ZNF503-AS2,219			2.53187e-05	0.0786926	Diagnosis	GABA_neurons
chr10:78973385-78974281		ENSG00000224596_ZMIZ1-AS1,93614			0.000308278	0.220307	Diagnosis	GABA_neurons
chr10:87342885-87343253	ENSG00000223482_NUTM2A-AS1,-273;ENSG00000224914_LINC00863,1200	ENSG00000224914_LINC00863,1200			0.000131991	0.147211	Diagnosis	GABA_neurons
chr10:92592654-92593528	ENSG00000138160_KIF11,0	ENSG00000138160_KIF11,0			0.000182021	0.176956	Diagnosis	GABA_neurons
chr10:100286178-100287033	ENSG00000196072_BLOC1S2,0	ENSG00000196072_BLOC1S2,0			0.000289464	0.220307	Diagnosis	GABA_neurons
chr10:118754700-118755602	ENSG00000151893_CACUL1,0	ENSG00000151893_CACUL1,0			0.000123202	0.146627	Diagnosis	GABA_neurons
chr11:695070-695788	ENSG00000177042_TMEM80,0;ENSG00000177106_EPS8L2,632	ENSG00000177042_TMEM80,0;ENSG00000177106_EPS8L2,632;ENSG00000177030_DEAF1,10927			2.00404e-05	0.0682954	Diagnosis	GABA_neurons
chr11:10857712-10858578	ENSG00000247271_ZBED5-AS1,0;ENSG00000236287_ZBED5,218	ENSG00000247271_ZBED5-AS1,0;ENSG00000236287_ZBED5,218			4.12353e-05	0.092746	Diagnosis	GABA_neurons
chr11:33161082-33161992	ENSG00000247151_CSTF3-DT,0;ENSG00000176102_CSTF3,379	ENSG00000247151_CSTF3-DT,0;ENSG00000176102_CSTF3,379			0.000344655	0.225828	Diagnosis	GABA_neurons
chr11:46903548-46904464		ENSG00000134569_LRP4,14178			0.00032386	0.225828	Diagnosis	GABA_neurons
chr11:47269500-47270283	ENSG00000110514_MADD,339;ENSG00000256746_AC018410.1,1827	ENSG00000110514_MADD,339			0.000215295	0.191401	Diagnosis	GABA_neurons
chr11:62805040-62805951	ENSG00000162231_NXF1,351	ENSG00000162231_NXF1,351			1.41408e-05	0.0641074	Diagnosis	GABA_neurons
chr11:64185411-64186334	ENSG00000168439_STIP1,139	ENSG00000168439_STIP1,139			0.000348495	0.225828	Diagnosis	GABA_neurons
chr11:65615086-65615926	ENSG00000173327_MAP3K11,0;ENSG00000197136_PCNX3,0	ENSG00000173327_MAP3K11,0;ENSG00000197136_PCNX3,0			0.000194856	0.183404	Diagnosis	GABA_neurons
chr11:65888070-65888994	ENSG00000175602_CCDC85B,-1679;ENSG00000172500_FIBP,0	ENSG00000172500_FIBP,0			6.03894e-05	0.11351	Diagnosis	GABA_neurons
chr11:77994421-77995345	ENSG00000149262_INTS4,0	ENSG00000149262_INTS4,0			0.000432526	0.245667	Diagnosis	GABA_neurons
chr11:79440469-79441224	ENSG00000149256_TENM4,0	ENSG00000149256_TENM4,0			0.000156118	0.163995	Diagnosis	GABA_neurons
chr11:83285725-83286650	ENSG00000255234_AP000446.1,0;ENSG00000137500_CCDC90B,0	ENSG00000137500_CCDC90B,0;ENSG00000255234_AP000446.1,0			4.51947e-05	0.0939774	Diagnosis	GABA_neurons
chr11:108957906-108958802	ENSG00000203334_AP003027.1,188	ENSG00000203334_AP003027.1,188			0.000214001	0.191401	Diagnosis	GABA_neurons
chr11:122202665-122203528		ENSG00000255248_MIR100HG,353193			0.000382618	0.230677	Diagnosis	GABA_neurons
chr12:45728653-45729458	ENSG00000273015_AC008124.1,-878;ENSG00000189079_ARID2,-248				3.24415e-05	0.0872912	Diagnosis	GABA_neurons
chr12:49564821-49565712		ENSG00000187778_MCRS1,2433			3.25496e-05	0.0872912	Diagnosis	GABA_neurons
chr12:71663544-71664438	ENSG00000173451_THAP2,0	ENSG00000173451_THAP2,0;ENSG00000133858_ZFC3H1,3287			1.49638e-05	0.0641074	Diagnosis	GABA_neurons
chr12:122526569-122527475	ENSG00000111011_RSRC2,0;ENSG00000184445_KNTC1,0	ENSG00000111011_RSRC2,0;ENSG00000184445_KNTC1,0			0.000395989	0.234379	Diagnosis	GABA_neurons
chr12:127628737-127629432					0.000264772	0.212836	Diagnosis	GABA_neurons
chr13:36346122-36347028	ENSG00000120664_SPART-AS1,0	ENSG00000120664_SPART-AS1,0;ENSG00000133104_SPART,23152			0.000105601	0.136374	Diagnosis	GABA_neurons
chr13:41547092-41547951					0.000261469	0.212675	Diagnosis	GABA_neurons
chr13:44917737-44918620					2.5657e-05	0.0786926	Diagnosis	GABA_neurons
chr13:52652229-52653094	ENSG00000273723_AL139089.1,0;ENSG00000165416_SUGT1,0	ENSG00000273723_AL139089.1,0;ENSG00000165416_SUGT1,0			0.000201242	0.185633	Diagnosis	GABA_neurons
chr13:60313016-60313834					0.00011548	0.140577	Diagnosis	GABA_neurons
chr13:77573953-77574763		ENSG00000287270_AL137140.1,12049;ENSG00000136155_SCEL,38279			4.41555e-05	0.0939774	Diagnosis	GABA_neurons
chr13:80753682-80754628		ENSG00000286746_AL590807.1,263109			0.000195836	0.183404	Diagnosis	GABA_neurons
chr13:88481790-88482509					0.000126727	0.147211	Diagnosis	GABA_neurons
chr14:20682367-20683267	ENSG00000258818_RNASE4,-1293;ENSG00000214274_ANG,-910				6.46421e-05	0.114825	Diagnosis	GABA_neurons
chr14:20802257-20803029	ENSG00000129538_RNASE1,0	ENSG00000129538_RNASE1,0			0.000284679	0.220307	Diagnosis	GABA_neurons
chr14:22588958-22589852	ENSG00000129562_DAD1,0	ENSG00000129562_DAD1,0			0.000247328	0.206416	Diagnosis	GABA_neurons
chr14:44896952-44897746	ENSG00000258633_AL049870.2,0;ENSG00000179476_C14orf28,0	ENSG00000258633_AL049870.2,0;ENSG00000179476_C14orf28,0			0.000306003	0.220307	Diagnosis	GABA_neurons
chr14:49862503-49863404	ENSG00000278002_AL627171.1,0;ENSG00000282885_AL627171.2,922	ENSG00000278002_AL627171.1,0;ENSG00000282885_AL627171.2,922			0.000293277	0.220307	Diagnosis	GABA_neurons
chr14:75273285-75274206					0.000281267	0.21979	Diagnosis	GABA_neurons
chr14:77554699-77555572		ENSG00000100596_SPTLC2,61201			0.000368776	0.229982	Diagnosis	GABA_neurons
chr14:81220694-81221554	ENSG00000273783_AL136040.1,0;ENSG00000165417_GTF2A1,0	ENSG00000165417_GTF2A1,0;ENSG00000273783_AL136040.1,0			0.00032889	0.225828	Diagnosis	GABA_neurons
chr14:95534386-95535313	ENSG00000247092_SNHG10,0;ENSG00000182512_GLRX5,883	ENSG00000247092_SNHG10,0;ENSG00000182512_GLRX5,883			1.76654e-05	0.0656746	Diagnosis	GABA_neurons
chr14:100568475-100569158		ENSG00000183092_BEGAIN,18255			0.000114913	0.140577	Diagnosis	GABA_neurons
chr15:20341851-20342614					0.00040119	0.234379	Diagnosis	GABA_neurons
chr15:38182626-38183502		ENSG00000259380_AC087473.1,43395			0.000121261	0.145851	Diagnosis	GABA_neurons
chr15:44288383-44289299	ENSG00000166734_CASC4,0	ENSG00000166734_CASC4,0			0.000261762	0.212675	Diagnosis	GABA_neurons
chr15:48925516-48926410		ENSG00000185634_SHC4,37509			0.000251573	0.20854	Diagnosis	GABA_neurons
chr15:68817311-68818133	ENSG00000258484_SPESP1,-88	ENSG00000140350_ANP32A,2764			9.46191e-06	0.0640632	Diagnosis	GABA_neurons
chr15:98648067-98648936	ENSG00000259424_IRAIN,-696;ENSG00000140443_IGF1R,0	ENSG00000140443_IGF1R,0			0.00011573	0.140577	Diagnosis	GABA_neurons
chr16:8373445-8374381		ENSG00000259819_AC018767.1,3581			0.000246249	0.206416	Diagnosis	GABA_neurons
chr17:4939735-4940618	ENSG00000108523_RNF167,0;ENSG00000108528_SLC25A11,0	ENSG00000108528_SLC25A11,0;ENSG00000108523_RNF167,0			0.000176996	0.176956	Diagnosis	GABA_neurons
chr17:5628790-5629714					0.000198002	0.184028	Diagnosis	GABA_neurons
chr17:7251689-7252555	ENSG00000175826_CTDNEP1,0;ENSG00000170291_ELP5,273	ENSG00000175826_CTDNEP1,0;ENSG00000170291_ELP5,273			0.000228997	0.196464	Diagnosis	GABA_neurons
chr17:7484258-7484942	ENSG00000174282_ZBTB4,0;ENSG00000181222_POLR2A,0	ENSG00000174282_ZBTB4,0;ENSG00000181222_POLR2A,0			3.34411e-05	0.0872912	Diagnosis	GABA_neurons
chr17:7614617-7615488	ENSG00000129245_FXR2,0;ENSG00000129214_SHBG,671	ENSG00000129245_FXR2,0;ENSG00000129214_SHBG,671			0.000308865	0.220307	Diagnosis	GABA_neurons
chr17:22523998-22524890	ENSG00000243655_AC132825.2,440;ENSG00000256618_MTRNR2L1,887	ENSG00000243655_AC132825.2,440;ENSG00000256618_MTRNR2L1,887			6.70853e-09	0.000411515	Diagnosis	GABA_neurons
chr17:28951156-28951946	ENSG00000109118_PHF12,0;ENSG00000179761_PIPOX,643	ENSG00000109118_PHF12,0;ENSG00000179761_PIPOX,643			0.000364789	0.229982	Diagnosis	GABA_neurons
chr17:44220650-44221597	ENSG00000260793_AC003102.1,0;ENSG00000108312_UBTF,29	ENSG00000260793_AC003102.1,0;ENSG00000108312_UBTF,29			3.70078e-05	0.0883193	Diagnosis	GABA_neurons
chr17:47895715-47896638	ENSG00000264920_AC018521.5,0;ENSG00000167182_SP2,0	ENSG00000264920_AC018521.5,0;ENSG00000167182_SP2,0			7.57499e-06	0.0640632	Diagnosis	GABA_neurons
chr17:64145490-64146357	ENSG00000266402_SNHG25,0	ENSG00000266402_SNHG25,0			0.000349307	0.225828	Diagnosis	GABA_neurons
chr17:68511982-68512747	ENSG00000108946_PRKAR1A,202	ENSG00000108946_PRKAR1A,202;ENSG00000267009_AC007780.1,98359			0.000421577	0.242684	Diagnosis	GABA_neurons
chr17:74514115-74514954					0.000124297	0.146627	Diagnosis	GABA_neurons
chr18:8844444-8845328					0.000168008	0.170346	Diagnosis	GABA_neurons
chr18:31684920-31685746	ENSG00000259985_AC017100.1,0;ENSG00000118276_B4GALT6,90	ENSG00000259985_AC017100.1,0;ENSG00000118276_B4GALT6,90			1.70166e-05	0.0656746	Diagnosis	GABA_neurons
chr18:50866599-50867465					0.000348523	0.225828	Diagnosis	GABA_neurons
chr18:68840652-68841455		ENSG00000150636_CCDC102B,125443			5.93256e-06	0.0640632	Diagnosis	GABA_neurons
chr19:246724-247546	ENSG00000282508_LINC01002,-180				0.000371855	0.229982	Diagnosis	GABA_neurons
chr19:12782182-12783120	ENSG00000267212_AC018761.3,1981	ENSG00000095066_HOOK2,89620			0.000356969	0.226914	Diagnosis	GABA_neurons
chr19:16197437-16198322	ENSG00000072958_AP1M1,0;ENSG00000287961_AC020911.3,0	ENSG00000287961_AC020911.3,0;ENSG00000072958_AP1M1,0			0.000422071	0.242684	Diagnosis	GABA_neurons
chr19:18152619-18153439	ENSG00000269145_AC007192.2,-928;ENSG00000105647_PIK3R2,0	ENSG00000105647_PIK3R2,0			0.000236146	0.199802	Diagnosis	GABA_neurons
chr19:47112859-47113684	ENSG00000142230_SAE1,0;ENSG00000130749_ZC3H4,92	ENSG00000142230_SAE1,0;ENSG00000130749_ZC3H4,92			0.000296929	0.220307	Diagnosis	GABA_neurons
chr19:49495766-49496683	ENSG00000142534_RPS11,0	ENSG00000142534_RPS11,0			3.90709e-05	0.0904411	Diagnosis	GABA_neurons
chr19:55269003-55269911		ENSG00000133265_HSPBP1,10470			0.000267131	0.212836	Diagnosis	GABA_neurons
chr19:55674722-55675636	ENSG00000267523_AC008735.2,-7;ENSG00000063245_EPN1,0	ENSG00000063245_EPN1,0			0.000130225	0.147211	Diagnosis	GABA_neurons
chr19:56393044-56393981	ENSG00000018869_ZNF582,0;ENSG00000267454_ZNF582-AS1,0	ENSG00000018869_ZNF582,0;ENSG00000267454_ZNF582-AS1,0			5.98643e-06	0.0640632	Diagnosis	GABA_neurons
chr19:58554647-58555572	ENSG00000130724_CHMP2A,0	ENSG00000130724_CHMP2A,0			7.33673e-06	0.0640632	Diagnosis	GABA_neurons
chr2:7666367-7667190					4.60708e-05	0.0942026	Diagnosis	GABA_neurons
chr2:14255006-14255947		ENSG00000230448_LINC00276,145016			4.15786e-05	0.092746	Diagnosis	GABA_neurons
chr2:15517495-15518405		ENSG00000151779_NBAS,42929			0.000329077	0.225828	Diagnosis	GABA_neurons
chr2:43595633-43596560	ENSG00000115970_THADA,0	ENSG00000115970_THADA,0			2.50398e-05	0.0786926	Diagnosis	GABA_neurons
chr2:55419506-55420407	ENSG00000115355_CCDC88A,0	ENSG00000115355_CCDC88A,0			0.000219847	0.191462	Diagnosis	GABA_neurons
chr2:63588332-63589187	ENSG00000014641_MDH1,0	ENSG00000014641_MDH1,0;ENSG00000143951_WDPCP,238656			0.000110096	0.139248	Diagnosis	GABA_neurons
chr2:68252261-68253166	ENSG00000273064_AC017083.1,0	ENSG00000273064_AC017083.1,0;ENSG00000221823_PPP3R1,3071			5.66882e-05	0.110393	Diagnosis	GABA_neurons
chr2:85771895-85772795		ENSG00000168874_ATOH8,20551			9.24648e-05	0.128579	Diagnosis	GABA_neurons
chr2:98123070-98123954		ENSG00000168658_VWA3B,35954			0.000128254	0.147211	Diagnosis	GABA_neurons
chr2:100562514-100563446	ENSG00000115539_PDCL3,0	ENSG00000115539_PDCL3,0			7.28763e-05	0.115945	Diagnosis	GABA_neurons
chr2:104938068-104938975		ENSG00000224509_AC010884.1,99521			5.49096e-05	0.108654	Diagnosis	GABA_neurons
chr2:148881344-148882206		ENSG00000168280_KIF5C,6117;ENSG00000231079_AC105402.3,6617			4.76527e-10	5.84622e-05	Diagnosis	GABA_neurons
chr2:150487320-150488224		ENSG00000115963_RND3,50787			0.000177787	0.176956	Diagnosis	GABA_neurons
chr2:177212217-177213046	ENSG00000170144_HNRNPA3,0;ENSG00000229337_AC079305.3,0	ENSG00000229337_AC079305.3,0;ENSG00000170144_HNRNPA3,0			1.87306e-05	0.066346	Diagnosis	GABA_neurons
chr2:199471135-199471980	ENSG00000119042_SATB2,0	ENSG00000119042_SATB2,0;ENSG00000225953_SATB2-AS1,13435			0.000374918	0.229982	Diagnosis	GABA_neurons
chr2:199910912-199911765	ENSG00000232732_AC097717.1,0;ENSG00000178074_C2orf69,0	ENSG00000232732_AC097717.1,0;ENSG00000178074_C2orf69,0			0.000105461	0.136374	Diagnosis	GABA_neurons
chr2:200864193-200865035	ENSG00000013441_CLK1,0	ENSG00000013441_CLK1,0			4.72e-05	0.0949294	Diagnosis	GABA_neurons
chr2:202265267-202266187	ENSG00000055044_NOP58,0	ENSG00000055044_NOP58,0			0.000204778	0.187485	Diagnosis	GABA_neurons
chr2:207529504-207530396	ENSG00000118260_CREB1,0;ENSG00000223725_AC009226.1,0	ENSG00000223725_AC009226.1,0;ENSG00000118260_CREB1,0			0.00013184	0.147211	Diagnosis	GABA_neurons
chr2:227406003-227406848					0.000105407	0.136374	Diagnosis	GABA_neurons
chr2:231707856-231708779	ENSG00000187514_PTMA,961	ENSG00000187514_PTMA,961			0.000305277	0.220307	Diagnosis	GABA_neurons
chr2:241315149-241315818	ENSG00000168385_SEPTIN2,49;ENSG00000115677_HDLBP,1243	ENSG00000168385_SEPTIN2,49;ENSG00000115677_HDLBP,1243			0.000370304	0.229982	Diagnosis	GABA_neurons
chr20:20337961-20338823		ENSG00000089101_CFAP61,285447			1.43465e-05	0.0641074	Diagnosis	GABA_neurons
chr20:36179307-36180216		ENSG00000088367_EPB41L1,87803			0.000304307	0.220307	Diagnosis	GABA_neurons
chr20:38033165-38034076	ENSG00000101407_TTI1,0;ENSG00000101413_RPRD1B,0	ENSG00000101407_TTI1,0;ENSG00000101413_RPRD1B,0			0.000380247	0.230677	Diagnosis	GABA_neurons
chr20:41028246-41029136	ENSG00000198900_TOP1,0	ENSG00000198900_TOP1,0			1.01199e-05	0.0640632	Diagnosis	GABA_neurons
chr20:61958984-61959833		ENSG00000130699_TAF4,105977			0.000221607	0.191462	Diagnosis	GABA_neurons
chr20:62121801-62122701	ENSG00000149657_LSM14B,0	ENSG00000149657_LSM14B,0			5.83261e-05	0.111807	Diagnosis	GABA_neurons
chr21:32135534-32136387		ENSG00000230323_LINC00159,61426			0.000351017	0.225828	Diagnosis	GABA_neurons
chr21:36654130-36655003					0.000211925	0.191401	Diagnosis	GABA_neurons
chr21:42219927-42220712		ENSG00000160179_ABCG1,20238			0.000100827	0.135932	Diagnosis	GABA_neurons
chr22:19479295-19480051	ENSG00000070010_UFD1,-93;ENSG00000093009_CDC45,0	ENSG00000093009_CDC45,0			7.93323e-05	0.12166	Diagnosis	GABA_neurons
chr22:20495406-20496309	ENSG00000099910_KLHL22,0;ENSG00000099917_MED15,0	ENSG00000099910_KLHL22,0;ENSG00000099917_MED15,0			0.000294415	0.220307	Diagnosis	GABA_neurons
chr22:32707725-32708440		ENSG00000185666_SYN3,349932			0.000435022	0.245946	Diagnosis	GABA_neurons
chr22:37559944-37560846	ENSG00000128283_CDC42EP1,0	ENSG00000128283_CDC42EP1,0			0.000328563	0.225828	Diagnosis	GABA_neurons
chr22:40044075-40044959	ENSG00000261202_Z83847.1,0;ENSG00000100354_TNRC6B,0	ENSG00000261202_Z83847.1,0;ENSG00000100354_TNRC6B,0			7.37157e-05	0.115945	Diagnosis	GABA_neurons
chr3:33440122-33441019	ENSG00000153560_UBP1,352	ENSG00000153560_UBP1,352			8.72092e-05	0.127371	Diagnosis	GABA_neurons
chr3:36992853-36993797	ENSG00000178567_EPM2AIP1,0;ENSG00000076242_MLH1,0	ENSG00000178567_EPM2AIP1,0;ENSG00000076242_MLH1,0			1.19814e-05	0.0640632	Diagnosis	GABA_neurons
chr3:42804078-42804934	ENSG00000181061_HIGD1A,0;ENSG00000144648_ACKR2,0	ENSG00000181061_HIGD1A,0;ENSG00000144648_ACKR2,0;ENSG00000235288_AC099329.1,47494			0.000398515	0.234379	Diagnosis	GABA_neurons
chr3:48989570-48990502	ENSG00000178467_P4HTM,0;ENSG00000223343_AC137630.1,0	ENSG00000223343_AC137630.1,0;ENSG00000178467_P4HTM,0			0.000179225	0.176956	Diagnosis	GABA_neurons
chr3:52253092-52253942					0.000166575	0.1703	Diagnosis	GABA_neurons
chr3:57597063-57597980	ENSG00000272146_ARF4-AS1,0;ENSG00000168374_ARF4,240	ENSG00000272146_ARF4-AS1,0;ENSG00000168374_ARF4,240			0.00039254	0.233779	Diagnosis	GABA_neurons
chr3:120094481-120095269	ENSG00000082701_GSK3B,-64;ENSG00000242622_AC092910.3,0	ENSG00000242622_AC092910.3,0			1.34535e-05	0.0641074	Diagnosis	GABA_neurons
chr3:128680487-128681362	ENSG00000163902_RPN1,0	ENSG00000163902_RPN1,0			8.99545e-05	0.128579	Diagnosis	GABA_neurons
chr3:136752075-136752949	ENSG00000118007_STAG1,0;ENSG00000261758_AC117382.2,0	ENSG00000118007_STAG1,0;ENSG00000261758_AC117382.2,0			9.67932e-05	0.131944	Diagnosis	GABA_neurons
chr3:150546150-150547041	ENSG00000144895_EIF2A,0	ENSG00000144895_EIF2A,0;ENSG00000120742_SERP1,56187			0.000424968	0.242684	Diagnosis	GABA_neurons
chr3:179147865-179148692	ENSG00000229102_AC076966.2,0;ENSG00000121879_PIK3CA,0	ENSG00000229102_AC076966.2,0;ENSG00000121879_PIK3CA,0			2.24076e-05	0.0742988	Diagnosis	GABA_neurons
chr3:184185572-184186479	ENSG00000161204_ABCF3,0	ENSG00000161204_ABCF3,0			0.00016571	0.1703	Diagnosis	GABA_neurons
chr3:186013049-186013969					4.73433e-07	0.0145207	Diagnosis	GABA_neurons
chr3:186783094-186783776	ENSG00000156976_EIF4A2,0;ENSG00000263826_AC112907.3,403	ENSG00000156976_EIF4A2,0;ENSG00000263826_AC112907.3,403			0.000425296	0.242684	Diagnosis	GABA_neurons
chr4:26410457-26411341		ENSG00000168214_RBPJ,247002			0.00035342	0.225828	Diagnosis	GABA_neurons
chr4:102827574-102828347	ENSG00000246560_UBE2D3-AS1,0	ENSG00000246560_UBE2D3-AS1,0;ENSG00000109332_UBE2D3,40549			1.55152e-05	0.0641074	Diagnosis	GABA_neurons
chr4:113762353-113763076	ENSG00000145349_CAMK2D,-426				0.000183181	0.176956	Diagnosis	GABA_neurons
chr4:139651236-139652103					0.000390248	0.233548	Diagnosis	GABA_neurons
chr4:188127129-188128039					1.09493e-05	0.0640632	Diagnosis	GABA_neurons
chr5:16784861-16785772		ENSG00000145555_MYO10,150516			0.000346443	0.225828	Diagnosis	GABA_neurons
chr5:32312617-32313492	ENSG00000150712_MTMR12,0	ENSG00000150712_MTMR12,0			0.000144934	0.15529	Diagnosis	GABA_neurons
chr5:43313104-43314022	ENSG00000112972_HMGCS1,0	ENSG00000112972_HMGCS1,0			3.74243e-05	0.0883193	Diagnosis	GABA_neurons
chr5:126747796-126748608					0.000335131	0.225828	Diagnosis	GABA_neurons
chr5:132013073-132013921	ENSG00000164398_ACSL6,-830;ENSG00000231585_AC034228.2,1625	ENSG00000231585_AC034228.2,1625			3.51915e-05	0.0883193	Diagnosis	GABA_neurons
chr5:136750203-136751114		ENSG00000250284_AC109439.2,15373			0.000232353	0.197958	Diagnosis	GABA_neurons
chr5:140401011-140401918	ENSG00000249637_AC008438.1,0;ENSG00000131503_ANKHD1,0	ENSG00000249637_AC008438.1,0;ENSG00000131503_ANKHD1,0			9.24896e-05	0.128579	Diagnosis	GABA_neurons
chr5:140564072-140564982	ENSG00000113108_APBB3,0;ENSG00000176087_SLC35A4,0	ENSG00000113108_APBB3,0;ENSG00000176087_SLC35A4,0			0.000217082	0.191462	Diagnosis	GABA_neurons
chr5:141560487-141561406		ENSG00000246422_AC008781.2,2176;ENSG00000131504_DIAPH1,57649			0.000301366	0.220307	Diagnosis	GABA_neurons
chr5:146878173-146878996		ENSG00000156475_PPP2R2B,205788			3.07517e-05	0.0872912	Diagnosis	GABA_neurons
chr5:173887701-173888554	ENSG00000113742_CPEB4,0	ENSG00000113742_CPEB4,0			7.34166e-05	0.115945	Diagnosis	GABA_neurons
chr5:173972892-173973785	ENSG00000185056_C5orf47,0	ENSG00000185056_C5orf47,0			6.97764e-05	0.115945	Diagnosis	GABA_neurons
chr5:179623393-179624251		ENSG00000169045_HNRNPH1,10533			3.18497e-05	0.0872912	Diagnosis	GABA_neurons
chr5:180313508-180314326		ENSG00000131459_GFPT2,39010			3.48965e-06	0.0611605	Diagnosis	GABA_neurons
chr6:27518846-27519721	ENSG00000285703_AL021918.3,0	ENSG00000285703_AL021918.3,0			0.000297793	0.220307	Diagnosis	GABA_neurons
chr6:28895527-28895828	ENSG00000224157_HCG14,-702				0.000299725	0.220307	Diagnosis	GABA_neurons
chr6:28895943-28896673	ENSG00000224157_HCG14,0	ENSG00000224157_HCG14,0			0.000294309	0.220307	Diagnosis	GABA_neurons
chr6:30614600-30615525		ENSG00000204569_PPP1R10,3087			9.32766e-05	0.128579	Diagnosis	GABA_neurons
chr6:30617121-30617897	ENSG00000204568_MRPS18B,0;ENSG00000204569_PPP1R10,715	ENSG00000204568_MRPS18B,0;ENSG00000204569_PPP1R10,715			7.16304e-05	0.115945	Diagnosis	GABA_neurons
chr6:31827123-31827995	ENSG00000204388_HSPA1B,0	ENSG00000204388_HSPA1B,0			8.88154e-06	0.0640632	Diagnosis	GABA_neurons
chr6:34531590-34532471		ENSG00000124507_PACSIN1,65529			0.000214464	0.191401	Diagnosis	GABA_neurons
chr6:42879369-42880313	ENSG00000146223_RPL7L1,0	ENSG00000146223_RPL7L1,0			8.60034e-05	0.127371	Diagnosis	GABA_neurons
chr6:45377587-45378390	ENSG00000196284_SUPT3H,0	ENSG00000196284_SUPT3H,0;ENSG00000124813_RUNX2,49430			7.16204e-05	0.115945	Diagnosis	GABA_neurons
chr6:63635540-63636403	ENSG00000118482_PHF3,0	ENSG00000118482_PHF3,0			6.12716e-05	0.11351	Diagnosis	GABA_neurons
chr6:68634689-68635579	ENSG00000230910_AL391807.1,0;ENSG00000135298_ADGRB3,0	ENSG00000230910_AL391807.1,0;ENSG00000135298_ADGRB3,0			0.00036627	0.229982	Diagnosis	GABA_neurons
chr6:88263422-88264301		ENSG00000234426_AL139042.1,178627			0.000445058	0.249322	Diagnosis	GABA_neurons
chr6:99096048-99096763					0.000319157	0.225031	Diagnosis	GABA_neurons
chr6:165987890-165988635	ENSG00000112541_PDE10A,0;ENSG00000281832_LINC00602,339	ENSG00000112541_PDE10A,0;ENSG00000281832_LINC00602,339			1.89276e-05	0.066346	Diagnosis	GABA_neurons
chr7:5423602-5424520	ENSG00000272953_AC092171.4,-1250;ENSG00000182095_TNRC18,894	ENSG00000182095_TNRC18,894			1.56762e-05	0.0641074	Diagnosis	GABA_neurons
chr7:14092115-14092985					0.000164366	0.1703	Diagnosis	GABA_neurons
chr7:33062427-33063363	ENSG00000122643_NT5C3A,0	ENSG00000122643_NT5C3A,0			0.000352202	0.225828	Diagnosis	GABA_neurons
chr7:35185831-35186740					0.000220622	0.191462	Diagnosis	GABA_neurons
chr7:44847700-44848601	ENSG00000105968_H2AFV,0;ENSG00000234183_LINC01952,0	ENSG00000105968_H2AFV,0;ENSG00000234183_LINC01952,0			0.000128865	0.147211	Diagnosis	GABA_neurons
chr7:45278661-45279473		ENSG00000286738_AC073968.2,9980			4.28967e-06	0.0640632	Diagnosis	GABA_neurons
chr7:66493213-66494110	ENSG00000179406_LINC00174,0;ENSG00000237310_AC008267.5,0	ENSG00000179406_LINC00174,0;ENSG00000237310_AC008267.5,0			0.000373492	0.229982	Diagnosis	GABA_neurons
chr7:73154376-73155339					0.000145564	0.15529	Diagnosis	GABA_neurons
chr7:139340035-139340906	ENSG00000146963_LUC7L2,0;ENSG00000164898_FMC1,578	ENSG00000146963_LUC7L2,0;ENSG00000164898_FMC1,578			8.16768e-06	0.0640632	Diagnosis	GABA_neurons
chr7:150648547-150649390					0.000316425	0.224395	Diagnosis	GABA_neurons
chr8:22672894-22673723					0.000349738	0.225828	Diagnosis	GABA_neurons
chr8:142816041-142816891					0.000137225	0.149335	Diagnosis	GABA_neurons
chr9:23552948-23553863		ENSG00000283982_AL445623.2,118524			0.000278952	0.219378	Diagnosis	GABA_neurons
chr9:32550495-32551369	ENSG00000235453_SMIM27,0;ENSG00000197579_TOPORS,1217	ENSG00000235453_SMIM27,0;ENSG00000197579_TOPORS,1217			0.000195834	0.183404	Diagnosis	GABA_neurons
chr9:83980027-83980912	ENSG00000165119_HNRNPK,0;ENSG00000178966_RMI1,0	ENSG00000165119_HNRNPK,0;ENSG00000178966_RMI1,0			0.00026143	0.212675	Diagnosis	GABA_neurons
chr9:95515647-95516526	ENSG00000185920_PTCH1,531;ENSG00000271659_AL161729.4,1602	ENSG00000185920_PTCH1,531			3.24726e-05	0.0872912	Diagnosis	GABA_neurons
chr9:97921948-97922873	ENSG00000287070_AL499604.1,0;ENSG00000136932_TRMO,0	ENSG00000136932_TRMO,0;ENSG00000287070_AL499604.1,0			0.000383571	0.230677	Diagnosis	GABA_neurons
chr9:108933785-108934734	ENSG00000070061_ELP1,0;ENSG00000119328_ABITRAM,0	ENSG00000070061_ELP1,0;ENSG00000119328_ABITRAM,0			4.25466e-05	0.0932104	Diagnosis	GABA_neurons
chr9:122228368-122229164	ENSG00000106852_LHX6,462	ENSG00000106852_LHX6,462			0.000440442	0.247868	Diagnosis	GABA_neurons
chr9:131111583-131112499		ENSG00000126878_AIF1L,15107			0.000137547	0.149335	Diagnosis	GABA_neurons
chr9:133979003-133979845		ENSG00000160293_VAV2,12759			6.55161e-05	0.114825	Diagnosis	GABA_neurons
chr9:137240625-137241472	ENSG00000188229_TUBB4B,0	ENSG00000188229_TUBB4B,0			3.32354e-05	0.0872912	Diagnosis	GABA_neurons
chrX:41084875-41085508	ENSG00000124486_USP9X,0	ENSG00000124486_USP9X,0			0.000156397	0.163995	Diagnosis	GABA_neurons
chrX:41333895-41334610	ENSG00000215301_DDX3X,611	ENSG00000215301_DDX3X,611			0.000115028	0.140577	Diagnosis	GABA_neurons
chrX:119943215-119944105	ENSG00000101882_NKAP,0	ENSG00000101882_NKAP,0			0.000268006	0.212836	Diagnosis	GABA_neurons
chrX:136880311-136881182	ENSG00000147274_RBMX,0	ENSG00000147274_RBMX,0			5.00865e-06	0.0640632	Diagnosis	GABA_neurons
chrY:12420968-12421928					3.68106e-05	0.0883193	Diagnosis	GABA_neurons
chrY:12661766-12662605	ENSG00000286009_AC244213.1,873	ENSG00000286009_AC244213.1,873;ENSG00000114374_USP9Y,124116			0.000268899	0.212836	Diagnosis	GABA_neurons
KI270734.1:116814-117744					0.000342827	0.225828	Diagnosis	GABA_neurons
chr1:1692390-1693344	ENSG00000189339_SLC35E2B,0	ENSG00000189339_SLC35E2B,0	1.49928	4.80968	2.33262e-06	0.142434	1.YC/0.HA	GABA_neurons
chr14:20802257-20803029	ENSG00000129538_RNASE1,0	ENSG00000129538_RNASE1,0	2.72557	2.7216	3.48294e-06	0.142434	1.YC/0.HA	GABA_neurons
chr19:55269003-55269911		ENSG00000133265_HSPBP1,10470	2.65459	2.8364	7.6341e-06	0.168988	1.YC/0.HA	GABA_neurons
chr3:128680487-128681362	ENSG00000163902_RPN1,0	ENSG00000163902_RPN1,0	1.19022	5.45088	7.4885e-06	0.168988	1.YC/0.HA	GABA_neurons
chr5:180313508-180314326		ENSG00000131459_GFPT2,39010	-2.69863	3.43485	8.26453e-06	0.168988	1.YC/0.HA	GABA_neurons
chr7:14092115-14092985			7.64834	1.50792	2.34956e-06	0.142434	1.YC/0.HA	GABA_neurons
chr17:22523998-22524890	ENSG00000243655_AC132825.2,440;ENSG00000256618_MTRNR2L1,887	ENSG00000243655_AC132825.2,440;ENSG00000256618_MTRNR2L1,887	-6.78361	2.58407	8.89892e-09	0.00109176	2.MCI/0.HA	GABA_neurons
chr1:1745901-1746752	ENSG00000215790_SLC35E2A,0	ENSG00000215790_SLC35E2A,0	-2.03346	3.59405	0.000120418	0.243958	3.AD/0.HA	GABA_neurons
chr1:3900300-3901059	ENSG00000198912_C1orf174,-7;ENSG00000236423_LINC01134,0	ENSG00000236423_LINC01134,0	-1.09258	5.66487	0.000122862	0.243958	3.AD/0.HA	GABA_neurons
chr1:11345781-11346690			-3.02113	3.08995	4.46599e-05	0.231443	3.AD/0.HA	GABA_neurons
chr1:16366870-16367733		ENSG00000055070_SZRD1,14295	-1.15614	5.3002	0.000162003	0.245373	3.AD/0.HA	GABA_neurons
chr1:16904557-16905455	ENSG00000272426_BX284668.6,0	ENSG00000272426_BX284668.6,0;ENSG00000058453_CROCC,164284	-1.20175	5.94883	1.56151e-05	0.193768	3.AD/0.HA	GABA_neurons
chr1:20255425-20256296			-3.0204	3.33315	7.29123e-06	0.144674	3.AD/0.HA	GABA_neurons
chr1:26695341-26696164	ENSG00000260063_AL512408.1,-1210	ENSG00000117713_ARID1A,2105	-1.24095	5.40393	3.67664e-05	0.231443	3.AD/0.HA	GABA_neurons
chr1:32072624-32073532	ENSG00000203325_AL445248.1,0;ENSG00000121775_TMEM39B,593	ENSG00000203325_AL445248.1,0;ENSG00000121775_TMEM39B,593	-1.0755	5.85788	9.66326e-05	0.243958	3.AD/0.HA	GABA_neurons
chr1:37690147-37691018	ENSG00000134690_CDCA8,-1463;ENSG00000116922_C1orf109,1231	ENSG00000116922_C1orf109,1231	-1.39511	4.60095	9.74302e-05	0.243958	3.AD/0.HA	GABA_neurons
chr1:153670693-153671602	ENSG00000143621_ILF2,0	ENSG00000143621_ILF2,0	-1.20684	5.14376	0.000117388	0.243958	3.AD/0.HA	GABA_neurons
chr1:176959099-176959864		ENSG00000152092_ASTN1,205109	-2.53991	3.38342	5.82648e-05	0.243958	3.AD/0.HA	GABA_neurons
chr1:179882020-179882939	ENSG00000143337_TOR1AIP1,0;ENSG00000272906_AL353708.3,0	ENSG00000272906_AL353708.3,0;ENSG00000143337_TOR1AIP1,0	-1.16952	5.60545	5.9743e-05	0.243958	3.AD/0.HA	GABA_neurons
chr10:67763933-67764805			-1.14936	5.26441	0.000169423	0.247447	3.AD/0.HA	GABA_neurons
chr10:118754700-118755602	ENSG00000151893_CACUL1,0	ENSG00000151893_CACUL1,0	-1.17069	5.54077	4.11017e-05	0.231443	3.AD/0.HA	GABA_neurons
chr11:695070-695788	ENSG00000177042_TMEM80,0;ENSG00000177106_EPS8L2,632	ENSG00000177042_TMEM80,0;ENSG00000177106_EPS8L2,632;ENSG00000177030_DEAF1,10927	-1.14092	5.96451	4.1005e-05	0.231443	3.AD/0.HA	GABA_neurons
chr11:10857712-10858578	ENSG00000247271_ZBED5-AS1,0;ENSG00000236287_ZBED5,218	ENSG00000247271_ZBED5-AS1,0;ENSG00000236287_ZBED5,218	-1.13775	5.63403	0.000101398	0.243958	3.AD/0.HA	GABA_neurons
chr11:59417905-59418773		ENSG00000172324_OR5A2,7639	-5.61966	2.24456	0.00016065	0.245373	3.AD/0.HA	GABA_neurons
chr11:62805040-62805951	ENSG00000162231_NXF1,351	ENSG00000162231_NXF1,351	-1.26505	5.23215	4.36968e-05	0.231443	3.AD/0.HA	GABA_neurons
chr11:83285725-83286650	ENSG00000255234_AP000446.1,0;ENSG00000137500_CCDC90B,0	ENSG00000137500_CCDC90B,0;ENSG00000255234_AP000446.1,0	-1.06959	5.64609	0.00015797	0.245373	3.AD/0.HA	GABA_neurons
chr12:45728653-45729458	ENSG00000273015_AC008124.1,-878;ENSG00000189079_ARID2,-248		-1.18106	5.18673	0.000125094	0.243958	3.AD/0.HA	GABA_neurons
chr12:71663544-71664438	ENSG00000173451_THAP2,0	ENSG00000173451_THAP2,0;ENSG00000133858_ZFC3H1,3287	-1.21991	5.37162	4.97132e-05	0.234578	3.AD/0.HA	GABA_neurons
chr13:27621555-27622335	ENSG00000139517_LNX2,-1026;ENSG00000186184_POLR1D,813	ENSG00000186184_POLR1D,813	-1.2817	4.76719	0.000140791	0.243958	3.AD/0.HA	GABA_neurons
chr13:44917737-44918620			-1.20834	5.37285	7.93116e-05	0.243958	3.AD/0.HA	GABA_neurons
chr13:77573953-77574763		ENSG00000287270_AL137140.1,12049;ENSG00000136155_SCEL,38279	-6.00734	2.51152	7.26718e-05	0.243958	3.AD/0.HA	GABA_neurons
chr13:80753682-80754628		ENSG00000286746_AL590807.1,263109	-2.976	3.09624	0.000102415	0.243958	3.AD/0.HA	GABA_neurons
chr14:22588958-22589852	ENSG00000129562_DAD1,0	ENSG00000129562_DAD1,0	-1.27229	4.77637	0.000177261	0.249966	3.AD/0.HA	GABA_neurons
chr14:68887975-68888811		ENSG00000072110_ACTN1,90629	-5.64063	2.27299	0.000145974	0.245324	3.AD/0.HA	GABA_neurons
chr14:71488559-71489344		ENSG00000197555_SIPA1L1,168110	-5.69079	2.33434	9.0449e-05	0.243958	3.AD/0.HA	GABA_neurons
chr14:95534386-95535313	ENSG00000247092_SNHG10,0;ENSG00000182512_GLRX5,883	ENSG00000247092_SNHG10,0;ENSG00000182512_GLRX5,883	-1.17338	5.72619	3.66416e-05	0.231443	3.AD/0.HA	GABA_neurons
chr15:68817311-68818133	ENSG00000258484_SPESP1,-88	ENSG00000140350_ANP32A,2764	-1.76277	4.49001	3.74045e-06	0.114723	3.AD/0.HA	GABA_neurons
chr16:715954-716809	ENSG00000103260_METRN,836	ENSG00000103260_METRN,836	1.37549	4.46979	0.00010351	0.243958	3.AD/0.HA	GABA_neurons
chr16:48491206-48492084			-5.65019	2.2685	0.000148361	0.245373	3.AD/0.HA	GABA_neurons
chr17:5628790-5629714			-3.1869	3.20623	9.43393e-06	0.144674	3.AD/0.HA	GABA_neurons
chr17:7484258-7484942	ENSG00000174282_ZBTB4,0;ENSG00000181222_POLR2A,0	ENSG00000174282_ZBTB4,0;ENSG00000181222_POLR2A,0	-1.1561	5.39795	0.000132772	0.243958	3.AD/0.HA	GABA_neurons
chr17:44220650-44221597	ENSG00000260793_AC003102.1,0;ENSG00000108312_UBTF,29	ENSG00000260793_AC003102.1,0;ENSG00000108312_UBTF,29	-1.47002	5.15109	3.41487e-06	0.114723	3.AD/0.HA	GABA_neurons
chr17:47895715-47896638	ENSG00000264920_AC018521.5,0;ENSG00000167182_SP2,0	ENSG00000264920_AC018521.5,0;ENSG00000167182_SP2,0	-1.1158	6.3145	2.81092e-05	0.231443	3.AD/0.HA	GABA_neurons
chr17:49675916-49676592	ENSG00000121067_SPOP,1571	ENSG00000121067_SPOP,1571	-5.6915	2.30609	9.98945e-05	0.243958	3.AD/0.HA	GABA_neurons
chr17:62933672-62934537		ENSG00000283538_AC005972.3,34012	-3.46741	2.74926	9.67109e-05	0.243958	3.AD/0.HA	GABA_neurons
chr17:68291298-68292034	ENSG00000108932_SLC16A6,-31	ENSG00000141337_ARSG,32116	-1.20593	5.06808	0.000139886	0.243958	3.AD/0.HA	GABA_neurons
chr18:8844444-8845328			-2.32263	3.66142	3.15339e-05	0.231443	3.AD/0.HA	GABA_neurons
chr18:50866599-50867465			-6.00136	2.52311	6.94039e-05	0.243958	3.AD/0.HA	GABA_neurons
chr19:43503760-43504663	ENSG00000176531_PHLDB3,272	ENSG00000176531_PHLDB3,272	-1.184	5.28822	0.000124385	0.243958	3.AD/0.HA	GABA_neurons
chr19:56393044-56393981	ENSG00000018869_ZNF582,0;ENSG00000267454_ZNF582-AS1,0	ENSG00000018869_ZNF582,0;ENSG00000267454_ZNF582-AS1,0	-1.49382	5.18565	2.42007e-06	0.114723	3.AD/0.HA	GABA_neurons
chr19:58554647-58555572	ENSG00000130724_CHMP2A,0	ENSG00000130724_CHMP2A,0	-1.4957	4.88829	8.33353e-06	0.144674	3.AD/0.HA	GABA_neurons
chr2:5691793-5692647	ENSG00000230090_AC108025.1,-675;ENSG00000224128_LINC01248,-305;ENSG00000176887_SOX11,0	ENSG00000176887_SOX11,0	-1.47575	4.31568	0.000174023	0.248254	3.AD/0.HA	GABA_neurons
chr2:7666367-7667190			-6.39821	2.77607	2.16088e-06	0.114723	3.AD/0.HA	GABA_neurons
chr2:14255006-14255947		ENSG00000230448_LINC00276,145016	2.93144	2.70605	0.000171868	0.248065	3.AD/0.HA	GABA_neurons
chr2:43595633-43596560	ENSG00000115970_THADA,0	ENSG00000115970_THADA,0	-1.244	5.28111	3.86394e-05	0.231443	3.AD/0.HA	GABA_neurons
chr2:68252261-68253166	ENSG00000273064_AC017083.1,0	ENSG00000273064_AC017083.1,0;ENSG00000221823_PPP3R1,3071	-1.18023	5.64886	4.52759e-05	0.231443	3.AD/0.HA	GABA_neurons
chr2:98123070-98123954		ENSG00000168658_VWA3B,35954	5.91236	2.12305	0.000123779	0.243958	3.AD/0.HA	GABA_neurons
chr2:154709069-154709881		ENSG00000162989_KCNJ3,11214	-2.40551	3.28409	0.000141184	0.243958	3.AD/0.HA	GABA_neurons
chr2:200864193-200865035	ENSG00000013441_CLK1,0	ENSG00000013441_CLK1,0	-1.18412	5.20528	0.00013526	0.243958	3.AD/0.HA	GABA_neurons
chr2:207854862-207855761		ENSG00000178385_PLEKHM3,169766	4.22603	2.356	0.000108544	0.243958	3.AD/0.HA	GABA_neurons
chr20:38033165-38034076	ENSG00000101407_TTI1,0;ENSG00000101413_RPRD1B,0	ENSG00000101407_TTI1,0;ENSG00000101413_RPRD1B,0	-1.25843	4.95726	0.000138006	0.243958	3.AD/0.HA	GABA_neurons
chr20:41028246-41029136	ENSG00000198900_TOP1,0	ENSG00000198900_TOP1,0	-1.21786	5.78256	1.76045e-05	0.196344	3.AD/0.HA	GABA_neurons
chr21:32135534-32136387		ENSG00000230323_LINC00159,61426	-2.25257	3.44243	0.000137044	0.243958	3.AD/0.HA	GABA_neurons
chr22:37559944-37560846	ENSG00000128283_CDC42EP1,0	ENSG00000128283_CDC42EP1,0	1.81292	3.79235	0.000119859	0.243958	3.AD/0.HA	GABA_neurons
chr22:41868131-41868855		ENSG00000198911_SREBF2,35052	2.71767	2.91208	0.000130246	0.243958	3.AD/0.HA	GABA_neurons
chr22:45817833-45818748		ENSG00000130638_ATXN10,146035	-4.11954	2.62405	0.000157582	0.245373	3.AD/0.HA	GABA_neurons
chr22:49448300-49449095		ENSG00000188511_C22orf34,208447	2.42215	3.00628	0.000112384	0.243958	3.AD/0.HA	GABA_neurons
chr3:48989570-48990502	ENSG00000178467_P4HTM,0;ENSG00000223343_AC137630.1,0	ENSG00000223343_AC137630.1,0;ENSG00000178467_P4HTM,0	-1.22663	5.51	3.50147e-05	0.231443	3.AD/0.HA	GABA_neurons
chr3:120094481-120095269	ENSG00000082701_GSK3B,-64;ENSG00000242622_AC092910.3,0	ENSG00000242622_AC092910.3,0	-1.06427	6.02106	0.000113786	0.243958	3.AD/0.HA	GABA_neurons
chr3:179147865-179148692	ENSG00000229102_AC076966.2,0;ENSG00000121879_PIK3CA,0	ENSG00000229102_AC076966.2,0;ENSG00000121879_PIK3CA,0	-1.20306	5.18664	0.000112935	0.243958	3.AD/0.HA	GABA_neurons
chr3:185399744-185400691		ENSG00000073803_MAP3K13,116803	-2.11102	3.72889	8.58992e-05	0.243958	3.AD/0.HA	GABA_neurons
chr4:43547546-43548305			-3.15954	2.90656	0.000130918	0.243958	3.AD/0.HA	GABA_neurons
chr4:102827574-102828347	ENSG00000246560_UBE2D3-AS1,0	ENSG00000246560_UBE2D3-AS1,0;ENSG00000109332_UBE2D3,40549	-1.15897	5.27621	0.00016691	0.246713	3.AD/0.HA	GABA_neurons
chr5:179623393-179624251		ENSG00000169045_HNRNPH1,10533	-1.19049	5.26406	0.00015383	0.245373	3.AD/0.HA	GABA_neurons
chr6:28895527-28895828	ENSG00000224157_HCG14,-702		-2.14272	3.50824	0.000159907	0.245373	3.AD/0.HA	GABA_neurons
chr6:30614600-30615525		ENSG00000204569_PPP1R10,3087	-1.33122	5.04469	2.92749e-05	0.231443	3.AD/0.HA	GABA_neurons
chr6:31827123-31827995	ENSG00000204388_HSPA1B,0	ENSG00000204388_HSPA1B,0	-1.07517	5.75523	0.000156045	0.245373	3.AD/0.HA	GABA_neurons
chr6:42879369-42880313	ENSG00000146223_RPL7L1,0	ENSG00000146223_RPL7L1,0	-1.36794	4.68202	8.54864e-05	0.243958	3.AD/0.HA	GABA_neurons
chr6:53916792-53917671		ENSG00000137269_LRRC1,122295	3.13298	2.65186	9.46717e-05	0.243958	3.AD/0.HA	GABA_neurons
chr6:63635540-63636403	ENSG00000118482_PHF3,0	ENSG00000118482_PHF3,0	-1.15185	5.45886	0.000123969	0.243958	3.AD/0.HA	GABA_neurons
chr6:88263422-88264301		ENSG00000234426_AL139042.1,178627	-5.9675	2.5025	9.62498e-05	0.243958	3.AD/0.HA	GABA_neurons
chr6:165987890-165988635	ENSG00000112541_PDE10A,0;ENSG00000281832_LINC00602,339	ENSG00000112541_PDE10A,0;ENSG00000281832_LINC00602,339	-1.61338	4.2502	8.73112e-05	0.243958	3.AD/0.HA	GABA_neurons
chr7:5423602-5424520	ENSG00000272953_AC092171.4,-1250;ENSG00000182095_TNRC18,894	ENSG00000182095_TNRC18,894	-1.25256	5.15076	5.60287e-05	0.243958	3.AD/0.HA	GABA_neurons
chr7:121876740-121877656		ENSG00000106278_PTPRZ1,3651	-5.69798	2.30531	0.000100176	0.243958	3.AD/0.HA	GABA_neurons
chr7:139340035-139340906	ENSG00000146963_LUC7L2,0;ENSG00000164898_FMC1,578	ENSG00000146963_LUC7L2,0;ENSG00000164898_FMC1,578	-1.29375	5.29918	2.3015e-05	0.231443	3.AD/0.HA	GABA_neurons
chr7:148807454-148808383		ENSG00000106462_EZH2,75938	-3.20552	2.95224	0.000111545	0.243958	3.AD/0.HA	GABA_neurons
chr8:59643405-59644292			-2.57779	3.22143	0.0001322	0.243958	3.AD/0.HA	GABA_neurons
chr8:93898390-93899234		ENSG00000164951_PDP1,40583	-2.48757	3.35035	9.75707e-05	0.243958	3.AD/0.HA	GABA_neurons
chr9:36154278-36155154		ENSG00000122694_GLIPR2,17742	-2.09688	3.60025	0.000164993	0.246713	3.AD/0.HA	GABA_neurons
chr9:95515647-95516526	ENSG00000185920_PTCH1,531;ENSG00000271659_AL161729.4,1602	ENSG00000185920_PTCH1,531	-2.07758	4.09869	6.96557e-06	0.144674	3.AD/0.HA	GABA_neurons
chrX:15857938-15858829			-5.79984	2.35793	4.95268e-05	0.234578	3.AD/0.HA	GABA_neurons
chrX:41084875-41085508	ENSG00000124486_USP9X,0	ENSG00000124486_USP9X,0	-1.2905	4.81412	0.00014533	0.245324	3.AD/0.HA	GABA_neurons
chrX:41333895-41334610	ENSG00000215301_DDX3X,611	ENSG00000215301_DDX3X,611	-1.53584	4.64392	1.57941e-05	0.193768	3.AD/0.HA	GABA_neurons
chrX:136880311-136881182	ENSG00000147274_RBMX,0	ENSG00000147274_RBMX,0	-1.71947	4.01398	8.38496e-05	0.243958	3.AD/0.HA	GABA_neurons
chr1:44071857-44072691		ENSG00000230615_AL139220.2,41420	-3.34245	1.98113	0.000150672	0.231063	2.MCI/1.YC	GABA_neurons
chr1:53413285-53414156			-2.68181	2.35817	0.000152589	0.231113	2.MCI/1.YC	GABA_neurons
chr1:84711004-84711788			-2.64434	2.39224	6.34973e-05	0.158281	2.MCI/1.YC	GABA_neurons
chr1:186680048-186680874	ENSG00000073756_PTGS2,0;ENSG00000273129_PACERR,0	ENSG00000073756_PTGS2,0;ENSG00000273129_PACERR,0	-1.82657	3.5385	6.67233e-05	0.158281	2.MCI/1.YC	GABA_neurons
chr1:234175729-234176574		ENSG00000183780_SLC35F3,271053	-3.23907	2.02265	5.59489e-05	0.149218	2.MCI/1.YC	GABA_neurons
chr10:10505198-10506057			-7.31474	1.2931	6.91567e-05	0.159931	2.MCI/1.YC	GABA_neurons
chr10:25083424-25084286			-4.63545	1.3938	0.000114592	0.193172	2.MCI/1.YC	GABA_neurons
chr10:46441852-46442580		ENSG00000285294_LINC00842,43490	-4.55446	1.39084	0.00017572	0.249098	2.MCI/1.YC	GABA_neurons
chr10:107548104-107548978			-2.7959	2.11927	0.000174854	0.249098	2.MCI/1.YC	GABA_neurons
chr11:39345772-39346569			-3.04035	2.15962	0.000102585	0.193172	2.MCI/1.YC	GABA_neurons
chr11:108957906-108958802	ENSG00000203334_AP003027.1,188	ENSG00000203334_AP003027.1,188	-3.44763	1.93141	5.49392e-05	0.149218	2.MCI/1.YC	GABA_neurons
chr11:134100024-134100886		ENSG00000166086_JAM3,30953	-4.16718	1.80658	4.99261e-05	0.144806	2.MCI/1.YC	GABA_neurons
chr12:19688152-19689022		ENSG00000139154_AEBP2,284107	-3.6934	1.87729	8.00757e-05	0.175429	2.MCI/1.YC	GABA_neurons
chr12:30417470-30418353			-2.52922	2.42316	9.93128e-05	0.190376	2.MCI/1.YC	GABA_neurons
chr12:44913937-44914626		ENSG00000184613_NELL2,7222	-3.37128	1.93947	0.000116227	0.193172	2.MCI/1.YC	GABA_neurons
chr12:54970476-54971314		ENSG00000135426_TESPA1,13448	-4.36	1.86212	5.39143e-06	0.0494248	2.MCI/1.YC	GABA_neurons
chr12:56082724-56083626		ENSG00000065361_ERBB3,5925	-2.16227	3.06788	2.80275e-05	0.121348	2.MCI/1.YC	GABA_neurons
chr12:95343448-95344227			-2.3372	2.64095	0.000108545	0.193172	2.MCI/1.YC	GABA_neurons
chr12:105882191-105883105			-2.72898	2.24526	0.000150124	0.231063	2.MCI/1.YC	GABA_neurons
chr12:127628737-127629432			-3.80804	2.36698	5.64007e-06	0.0494248	2.MCI/1.YC	GABA_neurons
chr13:18211638-18212519		ENSG00000279516_FAM230C,16341	-2.10442	4.78762	2.14413e-07	0.00876834	2.MCI/1.YC	GABA_neurons
chr13:41547092-41547951			-1.64582	4.02142	3.33503e-05	0.121348	2.MCI/1.YC	GABA_neurons
chr13:60313016-60313834			-7.93843	1.78832	8.47263e-07	0.0207891	2.MCI/1.YC	GABA_neurons
chr13:61655209-61655981			-4.56452	1.4559	0.00018475	0.249098	2.MCI/1.YC	GABA_neurons
chr14:41873090-41873887		ENSG00000165379_LRFN5,265520	-2.93684	2.31917	7.77685e-05	0.173472	2.MCI/1.YC	GABA_neurons
chr14:42921560-42922430			-3.55981	1.99766	3.30609e-05	0.121348	2.MCI/1.YC	GABA_neurons
chr14:44896952-44897746	ENSG00000258633_AL049870.2,0;ENSG00000179476_C14orf28,0	ENSG00000258633_AL049870.2,0;ENSG00000179476_C14orf28,0	-1.26224	5.07385	0.000116777	0.193172	2.MCI/1.YC	GABA_neurons
chr14:63183822-63184295			-7.37326	1.30136	4.65541e-05	0.142786	2.MCI/1.YC	GABA_neurons
chr14:104655368-104656144	ENSG00000258736_AL583722.3,0	ENSG00000258736_AL583722.3,0	-2.9179	2.41648	4.60417e-05	0.142786	2.MCI/1.YC	GABA_neurons
chr16:65446416-65447212		ENSG00000261742_LINC00922,129133	-7.46744	1.44837	3.13598e-05	0.121348	2.MCI/1.YC	GABA_neurons
chr17:19510674-19511597		ENSG00000142494_SLC47A1,15289	-2.63266	2.41329	9.70539e-05	0.189573	2.MCI/1.YC	GABA_neurons
chr17:22523998-22524890	ENSG00000243655_AC132825.2,440;ENSG00000256618_MTRNR2L1,887	ENSG00000243655_AC132825.2,440;ENSG00000256618_MTRNR2L1,887	-8.92382	2.57628	1.05556e-10	1.295e-05	2.MCI/1.YC	GABA_neurons
chr17:55416011-55416796		ENSG00000108960_MMD,5128	-3.9439	1.64305	0.000130533	0.205311	2.MCI/1.YC	GABA_neurons
chr17:67147991-67148796		ENSG00000198265_HELZ,97193	-4.59969	1.41716	0.000113996	0.193172	2.MCI/1.YC	GABA_neurons
chr18:53589326-53590216		ENSG00000263438_LINC01919,20887	-2.91902	2.30519	3.31967e-05	0.121348	2.MCI/1.YC	GABA_neurons
chr18:68840652-68841455		ENSG00000150636_CCDC102B,125443	-3.608	2.09575	2.08771e-05	0.0994261	2.MCI/1.YC	GABA_neurons
chr2:16682472-16683325			-2.64372	2.32462	0.000179119	0.249098	2.MCI/1.YC	GABA_neurons
chr2:48125920-48126819		ENSG00000230773_AC092650.1,187405	-3.06716	2.11828	8.1549e-05	0.175522	2.MCI/1.YC	GABA_neurons
chr2:104938068-104938975		ENSG00000224509_AC010884.1,99521	-3.8226	2.56475	4.13393e-07	0.0126792	2.MCI/1.YC	GABA_neurons
chr2:108418126-108419011			-3.77083	2.16466	4.98146e-06	0.0494248	2.MCI/1.YC	GABA_neurons
chr2:113104153-113104823			-7.19863	1.26284	0.000118677	0.193172	2.MCI/1.YC	GABA_neurons
chr2:190841686-190842542			-2.64743	2.54147	3.46188e-05	0.121348	2.MCI/1.YC	GABA_neurons
chr2:199464412-199465269		ENSG00000119042_SATB2,5997;ENSG00000225953_SATB2-AS1,6712	-4.20084	1.88054	5.83026e-05	0.152187	2.MCI/1.YC	GABA_neurons
chr2:199471135-199471980	ENSG00000119042_SATB2,0	ENSG00000119042_SATB2,0;ENSG00000225953_SATB2-AS1,13435	-2.92776	2.51847	1.56805e-05	0.0961875	2.MCI/1.YC	GABA_neurons
chr20:4025749-4026645			-3.33006	2.19144	3.39798e-05	0.121348	2.MCI/1.YC	GABA_neurons
chr20:18790730-18791635		ENSG00000179935_LINC00652,2944	-3.25074	2.02373	9.25555e-05	0.189251	2.MCI/1.YC	GABA_neurons
chr20:20337961-20338823		ENSG00000089101_CFAP61,285447	-7.89662	1.75526	1.22788e-06	0.0251069	2.MCI/1.YC	GABA_neurons
chr21:38630998-38631917		ENSG00000157554_ERG,29863	-7.53943	1.50357	1.50519e-05	0.0961875	2.MCI/1.YC	GABA_neurons
chr21:43824264-43825130			-1.92221	3.13001	0.000177084	0.249098	2.MCI/1.YC	GABA_neurons
chr22:37403056-37403801		ENSG00000243902_FP325335.1,23644;ENSG00000166897_ELFN2,23678	1.899	3.75495	7.03945e-05	0.159931	2.MCI/1.YC	GABA_neurons
chr3:11116347-11117214			-4.96787	1.7922	3.31033e-05	0.121348	2.MCI/1.YC	GABA_neurons
chr3:124562137-124563085		ENSG00000160145_KALRN,482114	1.98352	3.40067	0.000158758	0.236217	2.MCI/1.YC	GABA_neurons
chr3:125953493-125954324			-7.23641	1.16185	0.000109824	0.193172	2.MCI/1.YC	GABA_neurons
chr3:127380876-127381563		ENSG00000244215_LINC02016,9107	-4.77673	1.5991	3.95473e-05	0.132814	2.MCI/1.YC	GABA_neurons
chr3:132254806-132255700		ENSG00000196353_CPNE4,29710	-2.77852	2.25605	0.000116689	0.193172	2.MCI/1.YC	GABA_neurons
chr3:150159021-150159903		ENSG00000243944_AC117386.2,119807	-4.3851	1.92891	1.18083e-05	0.0804826	2.MCI/1.YC	GABA_neurons
chr3:158847217-158848136			-3.72335	2.22677	5.32508e-06	0.0494248	2.MCI/1.YC	GABA_neurons
chr3:186013049-186013969			-3.8178	2.95313	2.56764e-09	0.000157504	2.MCI/1.YC	GABA_neurons
chr4:9155274-9156088		ENSG00000288075_AC108519.1,225181	-7.61146	1.48338	8.85376e-06	0.0678884	2.MCI/1.YC	GABA_neurons
chr4:17142125-17142992			-3.80671	1.98817	4.93122e-05	0.144806	2.MCI/1.YC	GABA_neurons
chr4:87835153-87836057		ENSG00000152595_MEPE,13742	-2.5537	2.31669	0.000171411	0.249098	2.MCI/1.YC	GABA_neurons
chr4:91963199-91963896			-3.47404	1.95316	5.16339e-05	0.144806	2.MCI/1.YC	GABA_neurons
chr4:168868134-168869033		ENSG00000145439_CBR4,141242;ENSG00000129116_PALLD,371082	-2.40344	2.5727	0.000116072	0.193172	2.MCI/1.YC	GABA_neurons
chr4:188127129-188128039			-2.58624	2.51788	8.63875e-05	0.18273	2.MCI/1.YC	GABA_neurons
chr5:38373473-38374388		ENSG00000164318_EGFLAM,115064	-4.73129	1.59359	6.70877e-05	0.158281	2.MCI/1.YC	GABA_neurons
chr5:106880401-106881177		ENSG00000251027_LINC01950,129875	-7.53883	1.48754	1.97364e-05	0.0994261	2.MCI/1.YC	GABA_neurons
chr5:126747796-126748608			-7.74799	1.58354	3.72136e-06	0.0456551	2.MCI/1.YC	GABA_neurons
chr5:175517649-175518296		ENSG00000164466_SFXN1,40587	-3.2891	2.04082	4.27272e-05	0.137946	2.MCI/1.YC	GABA_neurons
chr5:180313508-180314326		ENSG00000131459_GFPT2,39010	2.51578	3.31628	4.00552e-05	0.132814	2.MCI/1.YC	GABA_neurons
chr6:1311427-1312332	ENSG00000164379_FOXQ1,0	ENSG00000164379_FOXQ1,0	-2.43783	2.75249	9.4143e-05	0.189342	2.MCI/1.YC	GABA_neurons
chr6:7786969-7787833		ENSG00000153162_BMP6,60870	-4.07966	2.10284	2.6864e-06	0.0366198	2.MCI/1.YC	GABA_neurons
chr6:37473163-37474048		ENSG00000137200_CMTR1,39944	3.45778	2.17964	8.89494e-05	0.18496	2.MCI/1.YC	GABA_neurons
chr6:99096048-99096763			-7.68615	1.6299	7.20517e-06	0.0589306	2.MCI/1.YC	GABA_neurons
chr7:26493701-26494497		ENSG00000214870_AC004540.1,95108	-3.60924	2.14589	2.02572e-05	0.0994261	2.MCI/1.YC	GABA_neurons
chr7:125813857-125814772			-2.73644	2.18344	0.000184577	0.249098	2.MCI/1.YC	GABA_neurons
chr7:150648547-150649390			-7.85346	1.72115	1.79144e-06	0.0313972	2.MCI/1.YC	GABA_neurons
chr8:107851672-107852593			-3.08428	2.16405	6.07541e-05	0.155282	2.MCI/1.YC	GABA_neurons
chr8:125512728-125513631		ENSG00000253111_AC091114.1,45789	-2.55962	2.69814	2.1071e-05	0.0994261	2.MCI/1.YC	GABA_neurons
chr8:138843160-138844064		ENSG00000169436_COL22A1,69977	-2.03407	3.20125	6.47398e-05	0.158281	2.MCI/1.YC	GABA_neurons
chr9:75067586-75068511		ENSG00000106733_NMRK1,19706	-3.95776	1.64078	0.000119666	0.193172	2.MCI/1.YC	GABA_neurons
chr9:79829441-79830324			-3.6128	2.11177	1.12816e-05	0.0804826	2.MCI/1.YC	GABA_neurons
chr9:92270231-92271072		ENSG00000196305_IARS,22684	-4.07992	1.73899	9.73487e-05	0.189573	2.MCI/1.YC	GABA_neurons
chr9:109447445-109448380		ENSG00000070159_PTPN3,49933	-2.95628	2.36177	0.000126152	0.200998	2.MCI/1.YC	GABA_neurons
chr9:110951889-110952722		ENSG00000198121_LPAR1,85736	-3.01841	2.09396	0.000115426	0.193172	2.MCI/1.YC	GABA_neurons
chr9:120507942-120508843		ENSG00000136861_CDK5RAP2,71327	-5.00448	1.76326	1.78645e-05	0.0994261	2.MCI/1.YC	GABA_neurons
chr9:121566364-121567216	ENSG00000136848_DAB2IP,0	ENSG00000136848_DAB2IP,0	-1.82534	3.41644	0.000159809	0.236217	2.MCI/1.YC	GABA_neurons
chrX:73850773-73851666	ENSG00000229807_XIST,1057	ENSG00000229807_XIST,1057	3.75101	2.75065	1.82087e-05	0.0994261	2.MCI/1.YC	GABA_neurons
chrY:11531379-11532214			-3.71471	1.86982	5.19341e-05	0.144806	2.MCI/1.YC	GABA_neurons
chrY:12420968-12421928			-3.09111	2.54184	2.23119e-06	0.0342164	2.MCI/1.YC	GABA_neurons
chrY:12661766-12662605	ENSG00000286009_AC244213.1,873	ENSG00000286009_AC244213.1,873;ENSG00000114374_USP9Y,124116	-2.5424	3.03729	2.23254e-05	0.101443	2.MCI/1.YC	GABA_neurons
KI270734.1:116814-117744			-7.17077	1.26287	0.000184767	0.249098	2.MCI/1.YC	GABA_neurons
chr1:1723967-1724885	ENSG00000008128_CDK11A,0	ENSG00000008128_CDK11A,0;ENSG00000215790_SLC35E2A,21114	-1.19181	4.55911	0.00325898	0.246241	3.AD/1.YC	GABA_neurons
chr1:2132992-2133900		ENSG00000067606_PRKCZ,82581	-1.09736	5.27981	0.00110396	0.180237	3.AD/1.YC	GABA_neurons
chr1:2384683-2385535		ENSG00000116151_MORN1,6172	-3.48729	3.02394	1.07528e-05	0.0528242	3.AD/1.YC	GABA_neurons
chr1:3900300-3901059	ENSG00000198912_C1orf174,-7;ENSG00000236423_LINC01134,0	ENSG00000236423_LINC01134,0	-1.19944	5.48183	0.000228453	0.118322	3.AD/1.YC	GABA_neurons
chr1:8510008-8510940		ENSG00000142599_RERE,337981	-2.14877	3.12336	0.00121413	0.184806	3.AD/1.YC	GABA_neurons
chr1:8878467-8879332	ENSG00000230679_ENO1-AS1,0;ENSG00000074800_ENO1,0	ENSG00000074800_ENO1,0;ENSG00000230679_ENO1-AS1,0	-0.938307	5.58842	0.00280903	0.236254	3.AD/1.YC	GABA_neurons
chr1:9428579-9429498		ENSG00000284693_LINC02606,11066	-1.07369	5.00022	0.00197385	0.21631	3.AD/1.YC	GABA_neurons
chr1:10644451-10645247		ENSG00000272078_AL139423.1,5210;ENSG00000130940_CASZ1,151403	-2.90551	2.52735	0.00086692	0.17322	3.AD/1.YC	GABA_neurons
chr1:13748947-13749831		ENSG00000116731_PRDM2,48749	-1.09874	5.33435	0.000737699	0.167506	3.AD/1.YC	GABA_neurons
chr1:13766712-13767523		ENSG00000116731_PRDM2,66514	-3.45008	2.19485	0.00124445	0.185136	3.AD/1.YC	GABA_neurons
chr1:14742084-14742871		ENSG00000189337_KAZN,849292	-3.16832	2.69386	0.000110628	0.0916328	3.AD/1.YC	GABA_neurons
chr1:16366870-16367733		ENSG00000055070_SZRD1,14295	-1.51946	5.26051	5.6835e-06	0.0528242	3.AD/1.YC	GABA_neurons
chr1:16424956-16425788		ENSG00000187144_SPATA21,11636	2.78958	2.45036	0.0019433	0.215676	3.AD/1.YC	GABA_neurons
chr1:16473888-16474778			2.15303	2.96664	0.00289775	0.23754	3.AD/1.YC	GABA_neurons
chr1:16513847-16514747	ENSG00000261135_AL137802.2,0	ENSG00000261135_AL137802.2,0	-1.51407	3.88671	0.00166991	0.205695	3.AD/1.YC	GABA_neurons
chr1:16904557-16905455	ENSG00000272426_BX284668.6,0	ENSG00000272426_BX284668.6,0;ENSG00000058453_CROCC,164284	-1.31823	5.7625	3.53368e-05	0.0608391	3.AD/1.YC	GABA_neurons
chr1:17053708-17054635	ENSG00000117118_SDHB,0	ENSG00000117118_SDHB,0	-1.13942	5.40982	0.000470676	0.14656	3.AD/1.YC	GABA_neurons
chr1:17439389-17440287	ENSG00000179051_RCC2,0	ENSG00000179051_RCC2,0	-1.50926	4.32337	0.000467789	0.146057	3.AD/1.YC	GABA_neurons
chr1:17966141-17967041			-1.95712	3.5453	0.000384949	0.136854	3.AD/1.YC	GABA_neurons
chr1:19671977-19672777		ENSG00000158748_HTR6,7102	-3.53723	2.19937	0.000612885	0.160458	3.AD/1.YC	GABA_neurons
chr1:20255425-20256296			-2.74902	2.65968	0.000486005	0.147667	3.AD/1.YC	GABA_neurons
chr1:20400072-20400939		ENSG00000236963_LINC01141,30295	-2.5131	2.54532	0.00278203	0.23611	3.AD/1.YC	GABA_neurons
chr1:21345079-21345976	ENSG00000117298_ECE1,0	ENSG00000117298_ECE1,0	-1.013	5.3784	0.00233394	0.225695	3.AD/1.YC	GABA_neurons
chr1:22025043-22025938	ENSG00000070831_CDC42,0;ENSG00000228397_LINC01635,110;ENSG00000218510_LINC00339,485	ENSG00000070831_CDC42,0;ENSG00000228397_LINC01635,110;ENSG00000218510_LINC00339,485	-1.17401	4.84599	0.000988802	0.176149	3.AD/1.YC	GABA_neurons
chr1:22052391-22053156	ENSG00000285752_CDC42-AS1,0	ENSG00000285752_CDC42-AS1,0;ENSG00000070831_CDC42,26880	-1.12717	5.01644	0.00110545	0.180237	3.AD/1.YC	GABA_neurons
chr1:22451544-22452365		ENSG00000184677_ZBTB40,22706	-1.3552	5.28694	4.49343e-05	0.0609519	3.AD/1.YC	GABA_neurons
chr1:23344038-23344920	ENSG00000125944_HNRNPR,0	ENSG00000125944_HNRNPR,0	-1.01427	5.52524	0.00160625	0.202322	3.AD/1.YC	GABA_neurons
chr1:25233145-25233789	ENSG00000117614_SYF2,-643;ENSG00000284602_AL031432.4,559	ENSG00000284602_AL031432.4,559	-2.3848	2.87003	0.00177386	0.21012	3.AD/1.YC	GABA_neurons
chr1:25997756-25998680	ENSG00000158006_PAFAH2,0	ENSG00000158006_PAFAH2,0	-1.01883	5.54079	0.00134988	0.190574	3.AD/1.YC	GABA_neurons
chr1:26233736-26234618	ENSG00000130695_CEP85,0	ENSG00000130695_CEP85,0	-1.08513	5.56872	0.000580801	0.156949	3.AD/1.YC	GABA_neurons
chr1:26276085-26276583		ENSG00000130695_CEP85,41885	-2.78577	2.92453	0.000168221	0.108035	3.AD/1.YC	GABA_neurons
chr1:26408259-26409125	ENSG00000131914_LIN28A,-1692		-7.1799	1.44055	0.00176871	0.21012	3.AD/1.YC	GABA_neurons
chr1:26695341-26696164	ENSG00000260063_AL512408.1,-1210	ENSG00000117713_ARID1A,2105	-1.179	5.10628	0.00091261	0.175719	3.AD/1.YC	GABA_neurons
chr1:26787564-26788490	ENSG00000060642_PIGV,92	ENSG00000060642_PIGV,92	-1.1393	5.12128	0.000906873	0.175096	3.AD/1.YC	GABA_neurons
chr1:27671805-27672727	ENSG00000126709_IFI6,0	ENSG00000126709_IFI6,0;ENSG00000225886_AL445490.1,2337	-1.36281	4.90169	0.000247862	0.118322	3.AD/1.YC	GABA_neurons
chr1:27772748-27773627	ENSG00000269971_AL020997.2,-231;ENSG00000117758_STX12,0	ENSG00000117758_STX12,0	-1.01178	5.41017	0.00276477	0.235551	3.AD/1.YC	GABA_neurons
chr1:28235628-28236528	ENSG00000130770_ATP5IF1,0	ENSG00000130770_ATP5IF1,0	-1.08418	5.468	0.00081965	0.170149	3.AD/1.YC	GABA_neurons
chr1:28505481-28506337	ENSG00000180198_RCC1,0;ENSG00000242125_SNHG3,0	ENSG00000180198_RCC1,0;ENSG00000242125_SNHG3,0	-1.26003	4.36963	0.00317286	0.244049	3.AD/1.YC	GABA_neurons
chr1:28552611-28553469	ENSG00000180098_TRNAU1AP,0	ENSG00000180098_TRNAU1AP,0	-1.13066	5.13876	0.000786511	0.169582	3.AD/1.YC	GABA_neurons
chr1:28642669-28643582	ENSG00000120656_TAF12,0;ENSG00000229388_LINC01715,0	ENSG00000120656_TAF12,0;ENSG00000229388_LINC01715,0	-1.29856	4.94348	0.000244369	0.118322	3.AD/1.YC	GABA_neurons
chr1:29181515-29182320	ENSG00000116350_SRSF4,0	ENSG00000116350_SRSF4,0	-1.10932	5.3552	0.00137466	0.191849	3.AD/1.YC	GABA_neurons
chr1:31296456-31297380	ENSG00000060688_SNRNP40,0;ENSG00000121766_ZCCHC17,0	ENSG00000060688_SNRNP40,0;ENSG00000121766_ZCCHC17,0	-1.10751	5.38777	0.000763387	0.167506	3.AD/1.YC	GABA_neurons
chr1:32072624-32073532	ENSG00000203325_AL445248.1,0;ENSG00000121775_TMEM39B,593	ENSG00000203325_AL445248.1,0;ENSG00000121775_TMEM39B,593	-1.24553	5.71695	7.65292e-05	0.08124	3.AD/1.YC	GABA_neurons
chr1:32972588-32973508			-1.32368	4.24401	0.00249482	0.229325	3.AD/1.YC	GABA_neurons
chr1:33126951-33127862			-1.12977	5.18572	0.000833393	0.170867	3.AD/1.YC	GABA_neurons
chr1:33517484-33518380		ENSG00000121904_CSMD2,647462	-2.71395	2.87562	0.000282636	0.121715	3.AD/1.YC	GABA_neurons
chr1:36385563-36386468	ENSG00000196182_STK40,0	ENSG00000196182_STK40,0	-1.16234	5.75094	0.000364285	0.133689	3.AD/1.YC	GABA_neurons
chr1:37690147-37691018	ENSG00000134690_CDCA8,-1463;ENSG00000116922_C1orf109,1231	ENSG00000116922_C1orf109,1231	-1.52561	4.38238	0.000223797	0.118057	3.AD/1.YC	GABA_neurons
chr1:37691880-37692786	ENSG00000116922_C1orf109,0;ENSG00000134690_CDCA8,0	ENSG00000116922_C1orf109,0;ENSG00000134690_CDCA8,0	-1.17373	5.33282	0.000404527	0.139401	3.AD/1.YC	GABA_neurons
chr1:38012183-38013096		ENSG00000183520_UTP11,2925	-1.01205	5.45027	0.00180582	0.211398	3.AD/1.YC	GABA_neurons
chr1:38046553-38047446	ENSG00000185668_POU3F1,0;ENSG00000224592_MIR3659HG,0	ENSG00000185668_POU3F1,0;ENSG00000224592_MIR3659HG,0	-1.09673	4.92102	0.00185655	0.213801	3.AD/1.YC	GABA_neurons
chr1:39892873-39893689			-7.96784	2.13339	4.26545e-05	0.0608391	3.AD/1.YC	GABA_neurons
chr1:40160961-40161805	ENSG00000117000_RLF,0	ENSG00000117000_RLF,0	-1.25556	4.74806	0.000665718	0.162591	3.AD/1.YC	GABA_neurons
chr1:40373250-40374100		ENSG00000084070_SMAP2,28400	-1.25734	4.7814	0.000815622	0.169968	3.AD/1.YC	GABA_neurons
chr1:40691551-40692331	ENSG00000066136_NFYC,0;ENSG00000272145_NFYC-AS1,0	ENSG00000272145_NFYC-AS1,0;ENSG00000066136_NFYC,0	-1.00631	5.22267	0.00285566	0.236386	3.AD/1.YC	GABA_neurons
chr1:41394922-41395767			1.56849	4.18095	0.000718687	0.167506	3.AD/1.YC	GABA_neurons
chr1:41802740-41803555		ENSG00000127124_HIVEP3,232370	2.05259	3.04492	0.00228424	0.224427	3.AD/1.YC	GABA_neurons
chr1:42681941-42682756	ENSG00000285728_AC098484.4,0;ENSG00000065978_YBX1,0	ENSG00000285728_AC098484.4,0;ENSG00000065978_YBX1,0	-0.974846	5.34128	0.00312326	0.24247	3.AD/1.YC	GABA_neurons
chr1:43358394-43359283	ENSG00000234694_AL139289.2,0;ENSG00000117399_CDC20,0	ENSG00000234694_AL139289.2,0;ENSG00000117399_CDC20,0	-1.19633	4.62849	0.00232602	0.22566	3.AD/1.YC	GABA_neurons
chr1:45206029-45206852		ENSG00000162415_ZSWIM5,99357	-1.47827	5.00037	2.79338e-05	0.0571172	3.AD/1.YC	GABA_neurons
chr1:45339686-45340614	ENSG00000132773_TOE1,0;ENSG00000132781_MUTYH,279	ENSG00000132773_TOE1,0;ENSG00000132781_MUTYH,279	-1.13014	5.05845	0.00100626	0.176613	3.AD/1.YC	GABA_neurons
chr1:45583226-45584040	ENSG00000132780_NASP,0	ENSG00000132780_NASP,0	-0.967465	5.51451	0.00247469	0.228963	3.AD/1.YC	GABA_neurons
chr1:46132460-46133388	ENSG00000227857_AL358075.2,-1143;ENSG00000117461_PIK3R3,0	ENSG00000117461_PIK3R3,0	-1.15449	5.7681	0.000247435	0.118322	3.AD/1.YC	GABA_neurons
chr1:46340335-46341265	ENSG00000117481_NSUN4,158	ENSG00000117481_NSUN4,158	-1.14623	5.09072	0.000805565	0.169968	3.AD/1.YC	GABA_neurons
chr1:48471770-48472660	ENSG00000132122_SPATA6,0	ENSG00000132122_SPATA6,0	-1.04983	5.24488	0.00166763	0.205619	3.AD/1.YC	GABA_neurons
chr1:48610628-48611556		ENSG00000186094_AGBL4,1412398	-2.44868	2.85361	0.00095073	0.175719	3.AD/1.YC	GABA_neurons
chr1:48873598-48874466		ENSG00000186094_AGBL4,1149488	-2.18002	3.14568	0.00103154	0.177642	3.AD/1.YC	GABA_neurons
chr1:50959769-50960676	ENSG00000123080_CDKN2C,-69;ENSG00000185104_FAF1,0	ENSG00000185104_FAF1,0	-1.11596	4.76689	0.00227895	0.224427	3.AD/1.YC	GABA_neurons
chr1:54764191-54765115	ENSG00000162396_PARS2,0	ENSG00000162396_PARS2,0	-1.13964	5.47998	0.000358717	0.133689	3.AD/1.YC	GABA_neurons
chr1:58546271-58547097	ENSG00000173406_DAB1,0;ENSG00000162600_OMA1,0;ENSG00000286918_AL035411.3,103	ENSG00000173406_DAB1,0;ENSG00000162600_OMA1,0;ENSG00000286918_AL035411.3,103	-1.22932	4.93536	0.000569975	0.155891	3.AD/1.YC	GABA_neurons
chr1:58783710-58784617	ENSG00000234807_LINC01135,-511;ENSG00000177606_JUN,0	ENSG00000177606_JUN,0	-1.17431	5.96434	0.000195553	0.111733	3.AD/1.YC	GABA_neurons
chr1:58815007-58815569	ENSG00000272226_AL136985.2,-1665	ENSG00000234807_LINC01135,29879	-7.18524	1.50553	0.00109494	0.180237	3.AD/1.YC	GABA_neurons
chr1:60922029-60922914		ENSG00000162599_NFIA,56770;ENSG00000237928_NFIA-AS2,133971	-7.26389	1.58632	0.000977178	0.176149	3.AD/1.YC	GABA_neurons
chr1:62436099-62436969	ENSG00000162607_USP1,0	ENSG00000162607_USP1,0	-1.02948	5.64831	0.00186394	0.213801	3.AD/1.YC	GABA_neurons
chr1:67618383-67619240			-4.26723	1.95745	0.000467873	0.146057	3.AD/1.YC	GABA_neurons
chr1:68904210-68905125		ENSG00000285407_AL033530.1,225008	-2.98454	2.2866	0.00238722	0.227387	3.AD/1.YC	GABA_neurons
chr1:70706244-70707154	ENSG00000229051_LINC01788,0	ENSG00000229051_LINC01788,0	-7.35857	1.54381	0.000810242	0.169968	3.AD/1.YC	GABA_neurons
chr1:74570851-74571562		ENSG00000178965_ERICH3,102230	-3.66636	2.34121	0.000419773	0.139758	3.AD/1.YC	GABA_neurons
chr1:77683079-77683842	ENSG00000036549_AC118549.1,0	ENSG00000036549_AC118549.1,0	-1.05822	4.92478	0.00278961	0.236254	3.AD/1.YC	GABA_neurons
chr1:77978793-77979696	ENSG00000162613_FUBP1,0;ENSG00000162616_DNAJB4,0;ENSG00000137960_GIPC2,0	ENSG00000162613_FUBP1,0;ENSG00000162616_DNAJB4,0;ENSG00000137960_GIPC2,0	-1.20435	5.20237	0.000528939	0.153048	3.AD/1.YC	GABA_neurons
chr1:83413036-83413945		ENSG00000285782_AC116099.1,11408	-2.8308	2.38679	0.00158315	0.200738	3.AD/1.YC	GABA_neurons
chr1:85276193-85277094	ENSG00000223653_AL078459.1,0;ENSG00000142867_BCL10,0	ENSG00000142867_BCL10,0;ENSG00000223653_AL078459.1,0	-0.947126	5.83558	0.00220215	0.222348	3.AD/1.YC	GABA_neurons
chr1:98034149-98035021		ENSG00000225206_MIR137HG,14842	-3.30549	2.02191	0.00266423	0.231611	3.AD/1.YC	GABA_neurons
chr1:98044105-98044892		ENSG00000225206_MIR137HG,4971	-2.54032	2.53252	0.00181732	0.211915	3.AD/1.YC	GABA_neurons
chr1:98477822-98478767			-7.58921	1.8525	0.00015117	0.104192	3.AD/1.YC	GABA_neurons
chr1:100537829-100538705	ENSG00000181656_GPR88,0	ENSG00000181656_GPR88,0	-2.12531	3.03606	0.00322933	0.245317	3.AD/1.YC	GABA_neurons
chr1:106620321-106621203			-3.32797	2.11938	0.00191929	0.215628	3.AD/1.YC	GABA_neurons
chr1:107828823-107829688		ENSG00000134215_VAV3,135492	-2.94789	2.20214	0.00204426	0.21942	3.AD/1.YC	GABA_neurons
chr1:107991319-107992187		ENSG00000230489_VAV3-AS1,26876	-2.88388	2.21527	0.0028558	0.236386	3.AD/1.YC	GABA_neurons
chr1:109213584-109214391	ENSG00000031698_SARS,0	ENSG00000031698_SARS,0	-1.1214	4.83624	0.00203653	0.219166	3.AD/1.YC	GABA_neurons
chr1:109322771-109323664		ENSG00000134243_SORT1,74254	-2.66563	2.62968	0.00133372	0.190015	3.AD/1.YC	GABA_neurons
chr1:110122930-110123816			-2.53979	2.48886	0.00250288	0.229325	3.AD/1.YC	GABA_neurons
chr1:110338694-110339511	ENSG00000227963_RBM15-AS1,0;ENSG00000162775_RBM15,188	ENSG00000227963_RBM15-AS1,0;ENSG00000162775_RBM15,188	-1.03274	6.30077	0.000573936	0.155891	3.AD/1.YC	GABA_neurons
chr1:110753878-110754606			-7.28271	1.56895	0.000709946	0.167177	3.AD/1.YC	GABA_neurons
chr1:111755287-111756156	ENSG00000284830_AL049557.1,0;ENSG00000197852_INKA2,0;ENSG00000064703_DDX20,42	ENSG00000197852_INKA2,0;ENSG00000284830_AL049557.1,0;ENSG00000064703_DDX20,42	-1.10292	5.15776	0.00116179	0.183552	3.AD/1.YC	GABA_neurons
chr1:112619416-112620153	ENSG00000116489_CAPZA1,0;ENSG00000007341_ST7L,672	ENSG00000116489_CAPZA1,0;ENSG00000007341_ST7L,672	-1.25148	4.3222	0.00253298	0.229325	3.AD/1.YC	GABA_neurons
chr1:113072676-113073595	ENSG00000238198_LRIG2-DT,0;ENSG00000198799_LRIG2,0	ENSG00000238198_LRIG2-DT,0;ENSG00000198799_LRIG2,0	-1.08073	5.32509	0.00150157	0.197893	3.AD/1.YC	GABA_neurons
chr1:114757451-114758257	ENSG00000009307_CSDE1,419	ENSG00000009307_CSDE1,419	-1.38979	5.02749	6.5498e-05	0.0741438	3.AD/1.YC	GABA_neurons
chr1:119964761-119965671		ENSG00000134250_NOTCH2,135108	-2.02744	3.01451	0.00249952	0.229325	3.AD/1.YC	GABA_neurons
chr1:120354490-120355405			-3.59942	2.24991	0.000549887	0.15505	3.AD/1.YC	GABA_neurons
chr1:121184311-121185204	ENSG00000171943_SRGAP2C,0;ENSG00000188610_FAM72B,335	ENSG00000171943_SRGAP2C,0;ENSG00000188610_FAM72B,335	-1.42381	4.89075	7.73157e-05	0.08124	3.AD/1.YC	GABA_neurons
chr1:143884683-143885522			-2.46634	2.67865	0.00199221	0.216672	3.AD/1.YC	GABA_neurons
chr1:144523657-144524578			-2.59373	2.75344	0.000646542	0.162591	3.AD/1.YC	GABA_neurons
chr1:145607568-145608458	ENSG00000117262_GPR89A,0	ENSG00000117262_GPR89A,0	-1.44436	4.18065	0.00114205	0.182199	3.AD/1.YC	GABA_neurons
chr1:145751403-145752278		ENSG00000265491_RNF115,71817	-3.03168	2.58643	0.000250386	0.119063	3.AD/1.YC	GABA_neurons
chr1:145964150-145965048	ENSG00000272031_ANKRD34A,0;ENSG00000121851_POLR3GL,0	ENSG00000272031_ANKRD34A,0;ENSG00000121851_POLR3GL,0;ENSG00000278431_AC243547.2,2762	-1.06023	5.04813	0.00296724	0.23958	3.AD/1.YC	GABA_neurons
chr1:146035179-146036103	ENSG00000168509_HJV,643	ENSG00000168509_HJV,643	-1.07334	4.75823	0.00320794	0.244783	3.AD/1.YC	GABA_neurons
chr1:146037618-146038400	ENSG00000168509_HJV,-872		-1.16511	4.61149	0.00238412	0.227387	3.AD/1.YC	GABA_neurons
chr1:146376320-146377220			-1.20028	4.46389	0.00270586	0.232554	3.AD/1.YC	GABA_neurons
chr1:149636139-149637069			-1.55351	3.79461	0.00269611	0.232554	3.AD/1.YC	GABA_neurons
chr1:150625915-150626813		ENSG00000143420_ENSA,2799	-3.50407	2.2599	0.00134846	0.190574	3.AD/1.YC	GABA_neurons
chr1:150629007-150629913	ENSG00000143420_ENSA,0	ENSG00000143420_ENSA,0	-0.941399	6.15685	0.00229721	0.224427	3.AD/1.YC	GABA_neurons
chr1:150876261-150877141	ENSG00000143437_ARNT,0	ENSG00000143437_ARNT,0	-0.944539	5.51323	0.00308122	0.24153	3.AD/1.YC	GABA_neurons
chr1:151070757-151071431	ENSG00000197622_CDC42SE1,-432;ENSG00000143458_GABPB2,179	ENSG00000143458_GABPB2,179	-1.59926	4.19662	0.000283742	0.121715	3.AD/1.YC	GABA_neurons
chr1:151790131-151791029	ENSG00000203288_TDRKH-AS1,0;ENSG00000182134_TDRKH,387	ENSG00000203288_TDRKH-AS1,0;ENSG00000182134_TDRKH,387	-1.24417	5.38162	0.000163809	0.107469	3.AD/1.YC	GABA_neurons
chr1:153670693-153671602	ENSG00000143621_ILF2,0	ENSG00000143621_ILF2,0	-1.53314	5.07076	1.1694e-05	0.0528242	3.AD/1.YC	GABA_neurons
chr1:153727454-153728360	ENSG00000143624_INTS3,0	ENSG00000143624_INTS3,0	-1.31257	5.27489	9.46443e-05	0.0879647	3.AD/1.YC	GABA_neurons
chr1:153967156-153968070	ENSG00000143578_CREB3L4,0;ENSG00000143570_SLC39A1,114;ENSG00000273026_AL358472.3,640	ENSG00000143578_CREB3L4,0;ENSG00000143570_SLC39A1,114	-1.18838	4.96048	0.00132973	0.189694	3.AD/1.YC	GABA_neurons
chr1:154220351-154221176	ENSG00000143612_C1orf43,0;ENSG00000143569_UBAP2L,172	ENSG00000143612_C1orf43,0;ENSG00000143569_UBAP2L,172	-0.970381	5.40131	0.00295633	0.239402	3.AD/1.YC	GABA_neurons
chr1:155227183-155228099			-0.997323	5.48206	0.00296961	0.23958	3.AD/1.YC	GABA_neurons
chr1:155244305-155245218	ENSG00000177628_GBA,0	ENSG00000177628_GBA,0	-1.38792	5.53689	1.37558e-05	0.0528242	3.AD/1.YC	GABA_neurons
chr1:155591720-155592506			-2.64969	2.30388	0.00302086	0.240414	3.AD/1.YC	GABA_neurons
chr1:155859015-155859876	ENSG00000116580_GON4L,0;ENSG00000132718_SYT11,0	ENSG00000116580_GON4L,0;ENSG00000132718_SYT11,0	-1.02848	5.1909	0.00306132	0.241187	3.AD/1.YC	GABA_neurons
chr1:155960382-155961167		ENSG00000116584_ARHGEF2,45903	-1.80619	3.3293	0.00330934	0.248046	3.AD/1.YC	GABA_neurons
chr1:156338015-156338874	ENSG00000163467_TSACC,701	ENSG00000163467_TSACC,701;ENSG00000163468_CCT3,28999	-1.03626	5.49302	0.00186122	0.213801	3.AD/1.YC	GABA_neurons
chr1:156428990-156429891		ENSG00000125462_C1orf61,26872	-1.17351	4.43675	0.00333908	0.248511	3.AD/1.YC	GABA_neurons
chr1:159141443-159142303		ENSG00000163568_AIM2,4793	-1.3057	4.98628	0.000220702	0.117724	3.AD/1.YC	GABA_neurons
chr1:160261998-160262875	ENSG00000132716_DCAF8,0;ENSG00000228606_AL139011.1,257	ENSG00000132716_DCAF8,0;ENSG00000228606_AL139011.1,257	-1.04687	5.09522	0.00201733	0.218249	3.AD/1.YC	GABA_neurons
chr1:161045500-161046319	ENSG00000158773_USF1,0	ENSG00000158773_USF1,0	-1.06131	4.99552	0.00211882	0.221293	3.AD/1.YC	GABA_neurons
chr1:161132290-161133210	ENSG00000158796_DEDD,0	ENSG00000158796_DEDD,0	-1.38489	5.23048	4.12906e-05	0.0608391	3.AD/1.YC	GABA_neurons
chr1:161612143-161613052			-1.25206	4.59118	0.00173773	0.209216	3.AD/1.YC	GABA_neurons
chr1:164558563-164559440		ENSG00000185630_PBX1,2979	-1.06846	5.19112	0.00153785	0.199019	3.AD/1.YC	GABA_neurons
chr1:166875858-166876727	ENSG00000152382_TADA1,0	ENSG00000152382_TADA1,0	-1.05153	5.12356	0.0025989	0.230677	3.AD/1.YC	GABA_neurons
chr1:167126388-167127185		ENSG00000198842_DUSP27,32313;ENSG00000143167_GPA33,39294	-2.83777	2.5353	0.00204671	0.219491	3.AD/1.YC	GABA_neurons
chr1:169485537-169486416	ENSG00000117479_SLC19A2,0;ENSG00000213062_Z99572.1,0	ENSG00000117479_SLC19A2,0;ENSG00000213062_Z99572.1,0	-1.02355	5.67422	0.00110261	0.180237	3.AD/1.YC	GABA_neurons
chr1:169794458-169795374	ENSG00000171806_METTL18,0	ENSG00000171806_METTL18,0;ENSG00000000460_C1orf112,132451	-1.14439	5.02843	0.00110868	0.180237	3.AD/1.YC	GABA_neurons
chr1:169893513-169894506	ENSG00000000457_SCYL3,0	ENSG00000000457_SCYL3,0	-1.11558	5.86816	0.000275768	0.121212	3.AD/1.YC	GABA_neurons
chr1:172532511-172533379	ENSG00000094975_SUCO,162	ENSG00000094975_SUCO,162	-1.12898	6.11151	0.000158966	0.107047	3.AD/1.YC	GABA_neurons
chr1:173824176-173825039	ENSG00000117593_DARS2,0;ENSG00000120334_CENPL,0	ENSG00000120334_CENPL,0;ENSG00000117593_DARS2,0	-1.16178	5.1741	0.000607846	0.159685	3.AD/1.YC	GABA_neurons
chr1:175493702-175494653		ENSG00000116147_TNR,248963	-1.53639	3.91441	0.00194784	0.215676	3.AD/1.YC	GABA_neurons
chr1:176959099-176959864		ENSG00000152092_ASTN1,205109	-2.32391	2.76118	0.00238669	0.227387	3.AD/1.YC	GABA_neurons
chr1:177170486-177171353	ENSG00000198797_BRINP2,0	ENSG00000198797_BRINP2,0	-1.33595	4.6421	0.000618492	0.160995	3.AD/1.YC	GABA_neurons
chr1:177953396-177954221		ENSG00000120341_SEC16B,30082	-2.99856	2.62092	0.000575614	0.155891	3.AD/1.YC	GABA_neurons
chr1:178536783-178537705		ENSG00000240021_TEX35,23674	-2.10643	2.9327	0.00217715	0.221293	3.AD/1.YC	GABA_neurons
chr1:179882020-179882939	ENSG00000143337_TOR1AIP1,0;ENSG00000272906_AL353708.3,0	ENSG00000272906_AL353708.3,0;ENSG00000143337_TOR1AIP1,0	-1.58486	5.60259	1.0619e-06	0.0217131	3.AD/1.YC	GABA_neurons
chr1:183635464-183636372	ENSG00000162704_ARPC5,0;ENSG00000143344_RGL1,0	ENSG00000162704_ARPC5,0;ENSG00000143344_RGL1,0	-1.11497	5.91431	0.00029809	0.123134	3.AD/1.YC	GABA_neurons
chr1:184754530-184755429	ENSG00000116406_EDEM3,0	ENSG00000116406_EDEM3,0	-1.02319	5.95227	0.00117543	0.183552	3.AD/1.YC	GABA_neurons
chr1:186375040-186375986	ENSG00000047410_TPR,0;ENSG00000157181_ODR4,0	ENSG00000047410_TPR,0;ENSG00000157181_ODR4,0	-1.06329	5.9458	0.000571205	0.155891	3.AD/1.YC	GABA_neurons
chr1:186643427-186644275			-7.10902	1.53206	0.00162148	0.203405	3.AD/1.YC	GABA_neurons
chr1:186925798-186926722		ENSG00000116711_PLA2G4A,96849	-7.10902	1.53206	0.00162148	0.203405	3.AD/1.YC	GABA_neurons
chr1:191641161-191642072			-3.38602	2.15396	0.00131921	0.188851	3.AD/1.YC	GABA_neurons
chr1:193121552-193122442	ENSG00000134371_CDC73,0	ENSG00000134371_CDC73,0	-1.06461	5.18536	0.00175571	0.21012	3.AD/1.YC	GABA_neurons
chr1:198937044-198937881	ENSG00000229989_MIR181A1HG,0	ENSG00000229989_MIR181A1HG,0	-1.83292	3.96106	0.000144297	0.10116	3.AD/1.YC	GABA_neurons
chr1:200409636-200410502	ENSG00000162702_ZNF281,0	ENSG00000162702_ZNF281,0;ENSG00000230623_AC104461.1,76443	-1.16254	4.64507	0.0024589	0.228725	3.AD/1.YC	GABA_neurons
chr1:201377408-201378271	ENSG00000118194_TNNT2,0	ENSG00000118194_TNNT2,0	-2.24583	2.8856	0.00146892	0.196096	3.AD/1.YC	GABA_neurons
chr1:202348215-202349085	ENSG00000077157_PPP1R12B,0	ENSG00000077157_PPP1R12B,0	-1.05762	5.26049	0.00145016	0.195338	3.AD/1.YC	GABA_neurons
chr1:203558222-203559050			-2.78031	2.4205	0.00137528	0.191849	3.AD/1.YC	GABA_neurons
chr1:205750060-205750654	ENSG00000069275_NUCKS1,0	ENSG00000069275_NUCKS1,0	-1.26492	4.53853	0.00153239	0.198941	3.AD/1.YC	GABA_neurons
chr1:205812791-205813691	ENSG00000286619_AC119673.2,0;ENSG00000133065_SLC41A1,57	ENSG00000286619_AC119673.2,0;ENSG00000133065_SLC41A1,57	-1.12749	5.40895	0.000668393	0.162701	3.AD/1.YC	GABA_neurons
chr1:206001211-206002065	ENSG00000276600_RAB7B,1396	ENSG00000276600_RAB7B,1396	-3.9616	2.56722	3.86604e-05	0.0608391	3.AD/1.YC	GABA_neurons
chr1:208269091-208270051	ENSG00000286198_AL606753.2,616	ENSG00000286198_AL606753.2,616	-1.75742	3.44129	0.00281956	0.236254	3.AD/1.YC	GABA_neurons
chr1:209368851-209369744	ENSG00000231648_LINC01698,1189	ENSG00000231648_LINC01698,1189	-7.56053	1.84138	0.000160661	0.107047	3.AD/1.YC	GABA_neurons
chr1:210922451-210923311		ENSG00000143473_KCNH1,210854	-2.55491	2.58084	0.0028414	0.236386	3.AD/1.YC	GABA_neurons
chr1:211258757-211259682	ENSG00000117625_RCOR3,380	ENSG00000117625_RCOR3,380	-1.2035	5.37153	0.000243002	0.118322	3.AD/1.YC	GABA_neurons
chr1:212284854-212285749	ENSG00000066027_PPP2R5A,0	ENSG00000066027_PPP2R5A,0	-1.30847	5.91411	2.17262e-05	0.0555303	3.AD/1.YC	GABA_neurons
chr1:212367643-212368465		ENSG00000065600_PACC1,46436	-7.46913	1.63061	0.000361495	0.133689	3.AD/1.YC	GABA_neurons
chr1:219122750-219123684		ENSG00000228063_LYPLAL1-DT,50277	-7.45656	1.65343	0.000323	0.12686	3.AD/1.YC	GABA_neurons
chr1:222591931-222592849	ENSG00000143498_TAF1A,-1998	ENSG00000225265_TAF1A-AS1,2106	-7.37892	1.67742	0.000416216	0.139758	3.AD/1.YC	GABA_neurons
chr1:222712281-222713026	ENSG00000162819_BROX,0;ENSG00000186063_AIDA,184	ENSG00000162819_BROX,0;ENSG00000186063_AIDA,184	-1.61614	5.01986	3.74027e-06	0.0528242	3.AD/1.YC	GABA_neurons
chr1:223233419-223234333		ENSG00000143502_SUSD4,129845	-2.5975	2.8208	0.000917304	0.175719	3.AD/1.YC	GABA_neurons
chr1:225777307-225778202	ENSG00000143742_SRP9,0	ENSG00000143742_SRP9,0	-1.07398	5.28895	0.00117525	0.183552	3.AD/1.YC	GABA_neurons
chr1:226062150-226062994	ENSG00000272562_AL512343.2,-252;ENSG00000163041_H3F3A,299	ENSG00000163041_H3F3A,299	-0.977013	5.7061	0.00176437	0.21012	3.AD/1.YC	GABA_neurons
chr1:226109665-226110470			-1.04516	5.04154	0.00279881	0.236254	3.AD/1.YC	GABA_neurons
chr1:226939675-226940538		ENSG00000163050_COQ8A,42139	-1.01811	6.05009	0.000812529	0.169968	3.AD/1.YC	GABA_neurons
chr1:228457464-228458330	ENSG00000181218_HIST3H2A,0;ENSG00000196890_HIST3H2BB,0	ENSG00000181218_HIST3H2A,0;ENSG00000196890_HIST3H2BB,0	-1.11132	5.19238	0.0017422	0.209549	3.AD/1.YC	GABA_neurons
chr1:230858868-230859754		ENSG00000119280_C1orf198,9835	-1.92289	3.27192	0.00171964	0.207502	3.AD/1.YC	GABA_neurons
chr1:233543403-233544306	ENSG00000287423_AL360006.1,0	ENSG00000287423_AL360006.1,0	-3.3276	2.49396	0.000205518	0.112561	3.AD/1.YC	GABA_neurons
chr1:234368360-234369218			-2.35102	2.63896	0.00312542	0.24247	3.AD/1.YC	GABA_neurons
chr1:234610615-234611459	ENSG00000168264_IRF2BP2,-1090		-1.31285	5.21584	9.97711e-05	0.0891526	3.AD/1.YC	GABA_neurons
chr1:234735361-234736252		ENSG00000227630_LINC01132,11319	-2.39391	3.14568	0.000440953	0.142539	3.AD/1.YC	GABA_neurons
chr1:235128430-235129318	ENSG00000173726_TOMM20,0	ENSG00000173726_TOMM20,0	-1.13462	4.82411	0.00165106	0.204378	3.AD/1.YC	GABA_neurons
chr1:235328037-235328893	ENSG00000054267_ARID4B,0;ENSG00000285053_TBCE,0;ENSG00000152904_GGPS1,687	ENSG00000054267_ARID4B,0;ENSG00000285053_TBCE,0;ENSG00000152904_GGPS1,687	-1.21398	5.82828	0.000135655	0.0993997	3.AD/1.YC	GABA_neurons
chr1:235504150-235505037	ENSG00000162885_B3GALNT2,0	ENSG00000162885_B3GALNT2,0	-1.0658	6.11997	0.000453554	0.144155	3.AD/1.YC	GABA_neurons
chr1:239386244-239387110	ENSG00000133019_CHRM3,0	ENSG00000133019_CHRM3,0	-1.60383	3.90479	0.00131033	0.188851	3.AD/1.YC	GABA_neurons
chr1:241519288-241520152	ENSG00000091483_FH,0	ENSG00000091483_FH,0	-0.98366	5.31723	0.00291123	0.237633	3.AD/1.YC	GABA_neurons
chr1:243101274-243102182			-2.93965	2.17652	0.00238215	0.227387	3.AD/1.YC	GABA_neurons
chr1:243255519-243256309	ENSG00000143702_CEP170,-171;ENSG00000054282_SDCCAG8,0	ENSG00000054282_SDCCAG8,0	-1.05083	5.66684	0.000875869	0.174157	3.AD/1.YC	GABA_neurons
chr1:244451612-244452505	ENSG00000179397_CATSPERE,-1872;ENSG00000035687_ADSS,0	ENSG00000035687_ADSS,0	-1.03201	5.72291	0.00103655	0.177858	3.AD/1.YC	GABA_neurons
chr1:244970330-244971187	ENSG00000272195_AL356512.1,0;ENSG00000203666_EFCAB2,625	ENSG00000272195_AL356512.1,0;ENSG00000203666_EFCAB2,625	-1.17158	5.68368	0.000233331	0.118322	3.AD/1.YC	GABA_neurons
chr1:246565982-246566875	ENSG00000162851_TFB2M,0;ENSG00000162852_CNST,0	ENSG00000162851_TFB2M,0;ENSG00000162852_CNST,0	-1.01079	5.4377	0.00199392	0.216672	3.AD/1.YC	GABA_neurons
chr1:246817524-246818400			2.85959	3.7452	9.216e-07	0.0217131	3.AD/1.YC	GABA_neurons
chr1:248825731-248826563	ENSG00000175137_SH3BP5L,0	ENSG00000175137_SH3BP5L,0	-1.20304	5.27924	0.000336026	0.128443	3.AD/1.YC	GABA_neurons
chr1:248858601-248859501	ENSG00000171163_ZNF692,0;ENSG00000227237_AL672291.1,0	ENSG00000171163_ZNF692,0;ENSG00000227237_AL672291.1,0	-1.2577	5.14425	0.000254565	0.119486	3.AD/1.YC	GABA_neurons
chr10:689367-690243	ENSG00000151240_DIP2C,0	ENSG00000151240_DIP2C,0	-1.00376	5.1182	0.00333112	0.248511	3.AD/1.YC	GABA_neurons
chr10:1048703-1049587	ENSG00000067064_IDI1,0;ENSG00000047056_WDR37,0	ENSG00000067064_IDI1,0;ENSG00000047056_WDR37,0	-0.933005	6.24908	0.00273808	0.233927	3.AD/1.YC	GABA_neurons
chr10:3468963-3469832		ENSG00000233321_LINC02669,33083	-4.33339	2.13828	0.000462916	0.145622	3.AD/1.YC	GABA_neurons
chr10:3723690-3724588			-7.03973	1.51588	0.0025981	0.230677	3.AD/1.YC	GABA_neurons
chr10:5889578-5890499	ENSG00000134461_ANKRD16,0;ENSG00000134452_FBH1,0	ENSG00000134461_ANKRD16,0;ENSG00000134452_FBH1,0	-0.935486	5.90777	0.00243023	0.22814	3.AD/1.YC	GABA_neurons
chr10:6401519-6402399			-1.50876	3.7942	0.0030064	0.240414	3.AD/1.YC	GABA_neurons
chr10:6621191-6622078		ENSG00000225948_LINC02648,2475	-3.99941	1.8754	0.00210865	0.221107	3.AD/1.YC	GABA_neurons
chr10:8463607-8464536			-3.36068	2.16799	0.00243086	0.22814	3.AD/1.YC	GABA_neurons
chr10:9921845-9922749			-3.63631	2.33507	0.000737228	0.167506	3.AD/1.YC	GABA_neurons
chr10:10644264-10645109			-2.55905	3.08967	0.000141973	0.100681	3.AD/1.YC	GABA_neurons
chr10:14837698-14838621	ENSG00000284024_HSPA14,0;ENSG00000187522_HSPA14,0;ENSG00000185267_CDNF,0	ENSG00000185267_CDNF,0;ENSG00000284024_HSPA14,0;ENSG00000187522_HSPA14,0	-0.991587	5.74599	0.00171953	0.207502	3.AD/1.YC	GABA_neurons
chr10:18164714-18165626		ENSG00000165995_CACNB2,24037	-7.45672	1.82273	0.000333947	0.128432	3.AD/1.YC	GABA_neurons
chr10:25016200-25017167	ENSG00000185875_THNSL1,0	ENSG00000185875_THNSL1,0;ENSG00000151023_ENKUR,45112	-1.01778	5.68581	0.00131317	0.188851	3.AD/1.YC	GABA_neurons
chr10:26860635-26861471	ENSG00000136754_ABI1,0	ENSG00000136754_ABI1,0	-1.03836	5.40413	0.00178516	0.210707	3.AD/1.YC	GABA_neurons
chr10:31707231-31708037	ENSG00000237797_MACORIS,0	ENSG00000237797_MACORIS,0	-2.2045	2.87286	0.00257555	0.229803	3.AD/1.YC	GABA_neurons
chr10:38010439-38011311	ENSG00000189180_ZNF33A,0	ENSG00000189180_ZNF33A,0	-0.95865	5.66022	0.00255547	0.229325	3.AD/1.YC	GABA_neurons
chr10:43455272-43456184		ENSG00000243660_ZNF487,18431	-1.04765	5.29018	0.00175867	0.21012	3.AD/1.YC	GABA_neurons
chr10:46328757-46329555		ENSG00000274209_ANTXRL,42412	-2.04093	3.15858	0.00164358	0.204378	3.AD/1.YC	GABA_neurons
chr10:46786696-46787583			-1.69488	3.64166	0.00246838	0.228725	3.AD/1.YC	GABA_neurons
chr10:51699297-51700206	ENSG00000177613_CSTF2T,0	ENSG00000177613_CSTF2T,0;ENSG00000185532_PRKG1,708409	-1.23574	4.70633	0.000932524	0.175719	3.AD/1.YC	GABA_neurons
chr10:51960238-51961111		ENSG00000185532_PRKG1,969350	-2.39952	2.62654	0.00311248	0.242405	3.AD/1.YC	GABA_neurons
chr10:55966036-55966860			-3.31478	2.08809	0.00186965	0.213801	3.AD/1.YC	GABA_neurons
chr10:58936251-58937059			-7.29035	1.69263	0.000727175	0.167506	3.AD/1.YC	GABA_neurons
chr10:60777954-60778829	ENSG00000170312_CDK1,0	ENSG00000170312_CDK1,0	-1.21691	4.65088	0.00122146	0.184806	3.AD/1.YC	GABA_neurons
chr10:65193922-65194818			-3.24557	2.03879	0.00266797	0.231611	3.AD/1.YC	GABA_neurons
chr10:67763933-67764805			-1.58577	5.26078	2.6182e-06	0.0458873	3.AD/1.YC	GABA_neurons
chr10:67884310-67885140	ENSG00000096717_SIRT1,0	ENSG00000096717_SIRT1,0	-0.994225	5.19272	0.0031179	0.242405	3.AD/1.YC	GABA_neurons
chr10:68406770-68407601	ENSG00000204130_RUFY2,0	ENSG00000204130_RUFY2,0	-0.989527	5.2962	0.00265896	0.231611	3.AD/1.YC	GABA_neurons
chr10:68900717-68901656	ENSG00000107625_DDX50,0	ENSG00000107625_DDX50,0;ENSG00000285871_AL359844.1,3797	-1.07704	5.64573	0.000655729	0.162591	3.AD/1.YC	GABA_neurons
chr10:71313001-71313785			-2.2618	2.94112	0.00217103	0.221293	3.AD/1.YC	GABA_neurons
chr10:72273424-72274229	ENSG00000168209_DDIT4,0;ENSG00000269926_DDIT4-AS1,1751	ENSG00000168209_DDIT4,0	-1.21716	5.76173	8.69255e-05	0.0838787	3.AD/1.YC	GABA_neurons
chr10:72354408-72355275	ENSG00000148719_DNAJB12,0	ENSG00000148719_DNAJB12,0	-1.06809	5.51316	0.00109042	0.180237	3.AD/1.YC	GABA_neurons
chr10:72726849-72727740		ENSG00000156026_MCU,34718	-7.97106	2.12178	4.10615e-05	0.0608391	3.AD/1.YC	GABA_neurons
chr10:72784423-72785253		ENSG00000156026_MCU,92292	-2.06371	3.04047	0.00234892	0.226375	3.AD/1.YC	GABA_neurons
chr10:75401738-75402488	ENSG00000270087_AC010997.3,-492;ENSG00000165655_ZNF503,0;ENSG00000237149_ZNF503-AS2,219	ENSG00000165655_ZNF503,0;ENSG00000237149_ZNF503-AS2,219	-1.89118	4.42186	4.17521e-06	0.0528242	3.AD/1.YC	GABA_neurons
chr10:77309118-77310018		ENSG00000156113_KCNMA1,328351	-3.48548	2.6308	6.03369e-05	0.073012	3.AD/1.YC	GABA_neurons
chr10:78973385-78974281		ENSG00000224596_ZMIZ1-AS1,93614	-1.46959	4.84877	5.5606e-05	0.0696119	3.AD/1.YC	GABA_neurons
chr10:79189610-79190527		ENSG00000108175_ZMIZ1,120644	-2.24778	2.89744	0.00198979	0.216672	3.AD/1.YC	GABA_neurons
chr10:84179033-84179895		ENSG00000188373_C10orf99,5232	-1.72805	3.60332	0.00113293	0.181452	3.AD/1.YC	GABA_neurons
chr10:86366200-86367108	ENSG00000182771_GRID1,0	ENSG00000182771_GRID1,0	-1.38774	5.04269	8.44882e-05	0.0835915	3.AD/1.YC	GABA_neurons
chr10:86401045-86401884	ENSG00000287475_AL844892.2,-102;ENSG00000286359_AL844892.1,1317		-1.7861	3.36559	0.00241721	0.22814	3.AD/1.YC	GABA_neurons
chr10:87863163-87863996	ENSG00000227268_KLLN,0;ENSG00000171862_PTEN,0	ENSG00000227268_KLLN,0;ENSG00000171862_PTEN,0	-1.22383	4.94722	0.000503993	0.14834	3.AD/1.YC	GABA_neurons
chr10:88926344-88927204		ENSG00000138134_STAMBPL1,46610	-7.63186	1.86455	0.000100554	0.0891526	3.AD/1.YC	GABA_neurons
chr10:92592654-92593528	ENSG00000138160_KIF11,0	ENSG00000138160_KIF11,0	-1.73537	4.41241	3.32127e-05	0.0608391	3.AD/1.YC	GABA_neurons
chr10:93515207-93516087		ENSG00000138180_CEP55,18595	-2.17633	3.00475	0.00165956	0.205037	3.AD/1.YC	GABA_neurons
chr10:99620297-99621125	ENSG00000155287_SLC25A28,0;ENSG00000260475_AL353719.1,0	ENSG00000155287_SLC25A28,0;ENSG00000260475_AL353719.1,0	-0.997211	6.19453	0.00124921	0.185542	3.AD/1.YC	GABA_neurons
chr10:100286178-100287033	ENSG00000196072_BLOC1S2,0	ENSG00000196072_BLOC1S2,0	-1.43479	4.75496	0.000132257	0.0993997	3.AD/1.YC	GABA_neurons
chr10:100303491-100304359		ENSG00000107593_PKD2L1,25905	-7.64102	1.8505	0.000101507	0.0891526	3.AD/1.YC	GABA_neurons
chr10:101310997-101311768	ENSG00000225208_AL133387.1,0	ENSG00000225208_AL133387.1,0	-2.31391	3.1741	0.000268702	0.120151	3.AD/1.YC	GABA_neurons
chr10:101818105-101819001	ENSG00000198408_OGA,0;ENSG00000226009_KCNIP2-AS1,0	ENSG00000198408_OGA,0;ENSG00000226009_KCNIP2-AS1,0	-1.01723	5.56281	0.00230882	0.224618	3.AD/1.YC	GABA_neurons
chr10:102450194-102451088	ENSG00000269609_RPARP-AS1,378;ENSG00000120055_C10orf95,455	ENSG00000269609_RPARP-AS1,378;ENSG00000120055_C10orf95,455	-1.03618	5.25012	0.00246038	0.228725	3.AD/1.YC	GABA_neurons
chr10:102503579-102504375	ENSG00000138107_ACTR1A,-867;ENSG00000107882_SUFU,0	ENSG00000107882_SUFU,0	-1.02154	5.41573	0.00177244	0.21012	3.AD/1.YC	GABA_neurons
chr10:102641849-102642761	ENSG00000171206_TRIM8,0;ENSG00000272933_AL391121.1,1379	ENSG00000171206_TRIM8,0	-1.02601	5.53473	0.00286711	0.236386	3.AD/1.YC	GABA_neurons
chr10:110210803-110211616		ENSG00000119950_MXI1,3198	-1.06652	5.50687	0.00083574	0.170867	3.AD/1.YC	GABA_neurons
chr10:110225706-110226400		ENSG00000119950_MXI1,18101	-1.0403	5.21255	0.00296639	0.23958	3.AD/1.YC	GABA_neurons
chr10:110567193-110568007	ENSG00000108055_SMC3,0	ENSG00000108055_SMC3,0	-1.17367	5.14522	0.000564088	0.155891	3.AD/1.YC	GABA_neurons
chr10:112945582-112946448			-3.10276	2.33938	0.00071799	0.167506	3.AD/1.YC	GABA_neurons
chr10:118754700-118755602	ENSG00000151893_CACUL1,0	ENSG00000151893_CACUL1,0	-1.17589	5.28484	0.0013585	0.191182	3.AD/1.YC	GABA_neurons
chr10:122374209-122375060	ENSG00000107679_PLEKHA1,0	ENSG00000107679_PLEKHA1,0	-1.17468	5.49203	0.00059043	0.157129	3.AD/1.YC	GABA_neurons
chr10:122879249-122880173	ENSG00000213185_FAM24B,0	ENSG00000213185_FAM24B,0	-1.41332	4.10889	0.00149985	0.197893	3.AD/1.YC	GABA_neurons
chr10:124047636-124048441		ENSG00000182022_CHST15,45157	-7.46295	1.74347	0.000263101	0.120151	3.AD/1.YC	GABA_neurons
chr10:124882169-124883020			-7.25715	1.66916	0.00105615	0.178275	3.AD/1.YC	GABA_neurons
chr10:126253130-126254030		ENSG00000148848_ADAM12,134425	-4.01668	1.7894	0.00214546	0.221293	3.AD/1.YC	GABA_neurons
chr10:132537117-132538024	ENSG00000068383_INPP5A,0	ENSG00000068383_INPP5A,0	-0.864626	6.78394	0.00228743	0.224427	3.AD/1.YC	GABA_neurons
chr11:695070-695788	ENSG00000177042_TMEM80,0;ENSG00000177106_EPS8L2,632	ENSG00000177042_TMEM80,0;ENSG00000177106_EPS8L2,632;ENSG00000177030_DEAF1,10927	-1.29008	5.81015	2.94987e-05	0.0593283	3.AD/1.YC	GABA_neurons
chr11:1389258-1390185	ENSG00000174672_BRSK2,0	ENSG00000174672_BRSK2,0	-1.00009	5.71605	0.00179419	0.210878	3.AD/1.YC	GABA_neurons
chr11:2400058-2400958	ENSG00000184281_TSSC4,0	ENSG00000184281_TSSC4,0	-1.12147	6.15932	0.000172367	0.108035	3.AD/1.YC	GABA_neurons
chr11:3854897-3855657	ENSG00000228661_AC090587.1,0;ENSG00000229368_AC090587.2,285;ENSG00000167323_STIM1,370	ENSG00000228661_AC090587.1,0;ENSG00000229368_AC090587.2,285;ENSG00000167323_STIM1,370	-1.09876	4.83493	0.00281552	0.236254	3.AD/1.YC	GABA_neurons
chr11:8328602-8329522			-1.89408	3.23355	0.0025532	0.229325	3.AD/1.YC	GABA_neurons
chr11:10857712-10858578	ENSG00000247271_ZBED5-AS1,0;ENSG00000236287_ZBED5,218	ENSG00000247271_ZBED5-AS1,0;ENSG00000236287_ZBED5,218	-1.342	5.50325	4.10858e-05	0.0608391	3.AD/1.YC	GABA_neurons
chr11:12079882-12080791			-2.64881	2.69676	0.00227307	0.224427	3.AD/1.YC	GABA_neurons
chr11:18634074-18634975	ENSG00000179119_SPTY2D1,0	ENSG00000179119_SPTY2D1,0	-1.14938	5.54045	0.00036505	0.133689	3.AD/1.YC	GABA_neurons
chr11:19240627-19241543	ENSG00000129173_E2F8,77	ENSG00000129173_E2F8,77;ENSG00000255308_CSRP3-AS1,43852	-1.39503	4.11934	0.00189279	0.214815	3.AD/1.YC	GABA_neurons
chr11:22808295-22809166		ENSG00000148935_GAS2,182786	2.86957	2.37551	0.0025268	0.229325	3.AD/1.YC	GABA_neurons
chr11:31509333-31510222	ENSG00000148950_IMMP1L,0;ENSG00000109911_ELP4,0	ENSG00000148950_IMMP1L,0;ENSG00000109911_ELP4,0	-1.06861	4.99367	0.0027966	0.236254	3.AD/1.YC	GABA_neurons
chr11:33161082-33161992	ENSG00000247151_CSTF3-DT,0;ENSG00000176102_CSTF3,379	ENSG00000247151_CSTF3-DT,0;ENSG00000176102_CSTF3,379	-1.34278	4.98624	0.000256169	0.119497	3.AD/1.YC	GABA_neurons
chr11:34051468-34052172	ENSG00000135387_CAPRIN1,0;ENSG00000286626_AC090469.1,0	ENSG00000286626_AC090469.1,0;ENSG00000135387_CAPRIN1,0	-1.14685	4.94236	0.00120903	0.184806	3.AD/1.YC	GABA_neurons
chr11:34438471-34439334	ENSG00000121691_CAT,0	ENSG00000121691_CAT,0	-1.51866	3.93997	0.00181324	0.211862	3.AD/1.YC	GABA_neurons
chr11:35419153-35419931	ENSG00000255542_AC090625.2,96;ENSG00000110436_SLC1A2,132	ENSG00000255542_AC090625.2,96;ENSG00000110436_SLC1A2,132	-1.26882	4.30645	0.00228483	0.224427	3.AD/1.YC	GABA_neurons
chr11:41280938-41281839		ENSG00000148948_LRRC4C,177934	-2.11575	3.29139	0.000512734	0.149772	3.AD/1.YC	GABA_neurons
chr11:45560417-45561237			2.15634	3.03844	0.00186487	0.213801	3.AD/1.YC	GABA_neurons
chr11:46121213-46122025	ENSG00000255314_AC024475.3,-1006;ENSG00000135365_PHF21A,-35		-1.24296	5.12649	0.000385964	0.136854	3.AD/1.YC	GABA_neurons
chr11:46903548-46904464		ENSG00000134569_LRP4,14178	-1.87944	3.78087	0.000211469	0.113789	3.AD/1.YC	GABA_neurons
chr11:47204305-47205190			-2.41074	2.89067	0.00109521	0.180237	3.AD/1.YC	GABA_neurons
chr11:47269500-47270283	ENSG00000110514_MADD,339;ENSG00000256746_AC018410.1,1827	ENSG00000110514_MADD,339	-1.18687	5.46871	0.000297744	0.123134	3.AD/1.YC	GABA_neurons
chr11:47578457-47579377	ENSG00000123444_KBTBD4,0;ENSG00000231880_KF459542.1,732	ENSG00000123444_KBTBD4,0;ENSG00000213619_NDUFS3,13121	-1.08435	4.95552	0.00227508	0.224427	3.AD/1.YC	GABA_neurons
chr11:47642128-47642992	ENSG00000109919_MTCH2,0	ENSG00000109919_MTCH2,0	-1.26556	4.92939	0.000278802	0.121293	3.AD/1.YC	GABA_neurons
chr11:58578696-58579445	ENSG00000110031_LPXN,-476;ENSG00000186660_ZFP91,0	ENSG00000186660_ZFP91,0	-1.04244	5.42648	0.00127804	0.186883	3.AD/1.YC	GABA_neurons
chr11:59171467-59172426	ENSG00000110042_DTX4,37	ENSG00000110042_DTX4,37	-1.05952	5.44155	0.00111531	0.180516	3.AD/1.YC	GABA_neurons
chr11:59417905-59418773		ENSG00000172324_OR5A2,7639	-7.27023	1.63609	0.000951816	0.175719	3.AD/1.YC	GABA_neurons
chr11:59550255-59550988		ENSG00000287264_AP003778.1,4653	-1.24821	4.4377	0.00233451	0.225695	3.AD/1.YC	GABA_neurons
chr11:59615602-59616479	ENSG00000110048_OSBP,0	ENSG00000110048_OSBP,0;ENSG00000255139_AP000442.1,49679	-0.891397	6.40746	0.00312985	0.242567	3.AD/1.YC	GABA_neurons
chr11:61361621-61362538	ENSG00000162144_CYB561A3,0;ENSG00000149483_TMEM138,0	ENSG00000162144_CYB561A3,0;ENSG00000149483_TMEM138,0	-1.16754	5.49065	0.000385527	0.136854	3.AD/1.YC	GABA_neurons
chr11:62805040-62805951	ENSG00000162231_NXF1,351	ENSG00000162231_NXF1,351	-1.54022	5.12448	7.21723e-06	0.0528242	3.AD/1.YC	GABA_neurons
chr11:62831585-62832464	ENSG00000162236_STX5,0;ENSG00000256690_AP001160.1,0;ENSG00000283268_TEX54,339	ENSG00000162236_STX5,0;ENSG00000256690_AP001160.1,0;ENSG00000283268_TEX54,339;ENSG00000133316_WDR74,9345	-0.895259	6.0942	0.00305352	0.240912	3.AD/1.YC	GABA_neurons
chr11:62841409-62842327	ENSG00000133316_WDR74,0	ENSG00000133316_WDR74,0	-1.00931	5.41653	0.00184859	0.213801	3.AD/1.YC	GABA_neurons
chr11:62855565-62856477	ENSG00000255717_SNHG1,0;ENSG00000168003_SLC3A2,0	ENSG00000255717_SNHG1,0;ENSG00000168003_SLC3A2,0	-1.15196	5.09727	0.000754315	0.167506	3.AD/1.YC	GABA_neurons
chr11:62921072-62921861	ENSG00000168539_CHRM1,0	ENSG00000168539_CHRM1,0	-1.23846	4.42585	0.00236272	0.226757	3.AD/1.YC	GABA_neurons
chr11:62923144-62923960	ENSG00000168539_CHRM1,-1337		-1.36916	4.20701	0.00176884	0.21012	3.AD/1.YC	GABA_neurons
chr11:63445467-63446174			-3.2448	2.02047	0.00272228	0.23307	3.AD/1.YC	GABA_neurons
chr11:64185411-64186334	ENSG00000168439_STIP1,139	ENSG00000168439_STIP1,139	-1.10971	6.00231	0.000344451	0.130023	3.AD/1.YC	GABA_neurons
chr11:64269617-64270502	ENSG00000173264_GPR137,0	ENSG00000173264_GPR137,0;ENSG00000002330_BAD,14202	-1.12069	5.73755	0.000379319	0.136331	3.AD/1.YC	GABA_neurons
chr11:64878251-64879167		ENSG00000110047_EHD1,9129	-0.917101	5.99375	0.00290834	0.23761	3.AD/1.YC	GABA_neurons
chr11:65487320-65488207	ENSG00000286756_AP000769.6,0;ENSG00000279243_LINC02736,507	ENSG00000286756_AP000769.6,0;ENSG00000279243_LINC02736,507	-1.07415	5.45223	0.00140048	0.19367	3.AD/1.YC	GABA_neurons
chr11:65569850-65570730	ENSG00000176973_FAM89B,-1619;ENSG00000260233_SSSCA1-AS1,0;ENSG00000173465_ZNRD2,0	ENSG00000260233_SSSCA1-AS1,0;ENSG00000173465_ZNRD2,0	-1.12328	5.43418	0.000483518	0.147562	3.AD/1.YC	GABA_neurons
chr11:65615086-65615926	ENSG00000173327_MAP3K11,0;ENSG00000197136_PCNX3,0	ENSG00000173327_MAP3K11,0;ENSG00000197136_PCNX3,0	-1.25477	5.40731	0.000166875	0.108035	3.AD/1.YC	GABA_neurons
chr11:65888070-65888994	ENSG00000175602_CCDC85B,-1679;ENSG00000172500_FIBP,0	ENSG00000172500_FIBP,0	-1.47536	5.28933	1.2889e-05	0.0528242	3.AD/1.YC	GABA_neurons
chr11:65918807-65919720	ENSG00000175573_C11orf68,0;ENSG00000175550_DRAP1,0	ENSG00000175573_C11orf68,0;ENSG00000175550_DRAP1,0	-0.965224	6.18959	0.0017098	0.207502	3.AD/1.YC	GABA_neurons
chr11:66002005-66002967	ENSG00000175376_EIF1AD,0;ENSG00000175334_BANF1,0	ENSG00000175376_EIF1AD,0;ENSG00000175334_BANF1,0	-1.05548	5.45546	0.00101102	0.176942	3.AD/1.YC	GABA_neurons
chr11:66416721-66417495		ENSG00000254510_AP001107.5,7563	-1.66586	3.53224	0.00289192	0.237478	3.AD/1.YC	GABA_neurons
chr11:67118618-67119541	ENSG00000173120_KDM2A,0	ENSG00000173120_KDM2A,0	-0.994016	5.39541	0.0025115	0.229325	3.AD/1.YC	GABA_neurons
chr11:67482715-67483611	ENSG00000110711_AIP,0	ENSG00000110711_AIP,0	-1.08419	5.50193	0.000658813	0.162591	3.AD/1.YC	GABA_neurons
chr11:69640656-69641507	ENSG00000110092_CCND1,0	ENSG00000110092_CCND1,0	-1.91392	3.13294	0.00240087	0.227822	3.AD/1.YC	GABA_neurons
chr11:72112061-72112938	ENSG00000110203_FOLR3,-1931;ENSG00000110200_ANAPC15,0	ENSG00000110200_ANAPC15,0	-1.0049	5.79503	0.00122951	0.185136	3.AD/1.YC	GABA_neurons
chr11:72223153-72223840	ENSG00000165458_INPPL1,0	ENSG00000165458_INPPL1,0	-1.84782	3.70285	0.00044125	0.142539	3.AD/1.YC	GABA_neurons
chr11:72606538-72607405		ENSG00000186642_PDE2A,67186	-1.39266	4.02042	0.00250929	0.229325	3.AD/1.YC	GABA_neurons
chr11:73597874-73598766	ENSG00000054965_FAM168A,0	ENSG00000054965_FAM168A,0	-1.10153	5.55578	0.000751203	0.167506	3.AD/1.YC	GABA_neurons
chr11:73779121-73780032			-1.11548	5.48772	0.000526606	0.152733	3.AD/1.YC	GABA_neurons
chr11:74170687-74171603	ENSG00000168014_C2CD3,0;ENSG00000214517_PPME1,0	ENSG00000168014_C2CD3,0;ENSG00000214517_PPME1,0	-1.07698	5.37221	0.00157938	0.200738	3.AD/1.YC	GABA_neurons
chr11:74748452-74749268	ENSG00000166439_RNF169,0	ENSG00000166439_RNF169,0	-1.05977	5.159	0.00186324	0.213801	3.AD/1.YC	GABA_neurons
chr11:75241328-75242166	ENSG00000255136_AP001972.3,-155;ENSG00000261594_TPBGL,554	ENSG00000261594_TPBGL,554	-1.06835	5.10531	0.00175826	0.21012	3.AD/1.YC	GABA_neurons
chr11:76380694-76381587	ENSG00000137492_THAP12,0;ENSG00000179240_GVQW3,0	ENSG00000137492_THAP12,0;ENSG00000179240_GVQW3,0	-1.00207	5.42628	0.00194719	0.215676	3.AD/1.YC	GABA_neurons
chr11:76444395-76445265	ENSG00000255135_AP002360.1,0;ENSG00000158636_EMSY,0	ENSG00000255135_AP002360.1,0;ENSG00000158636_EMSY,0	-1.04738	5.40436	0.00122616	0.185031	3.AD/1.YC	GABA_neurons
chr11:77994421-77995345	ENSG00000149262_INTS4,0	ENSG00000149262_INTS4,0	-0.994115	5.729	0.00207769	0.22041	3.AD/1.YC	GABA_neurons
chr11:79440469-79441224	ENSG00000149256_TENM4,0	ENSG00000149256_TENM4,0	-1.56926	4.55838	6.56559e-05	0.0741438	3.AD/1.YC	GABA_neurons
chr11:80846328-80847144			-3.36021	2.14935	0.00144417	0.195338	3.AD/1.YC	GABA_neurons
chr11:82756941-82757850			-3.77105	2.32726	0.000106687	0.0908943	3.AD/1.YC	GABA_neurons
chr11:83156474-83157406	ENSG00000165494_PCF11,0	ENSG00000165494_PCF11,0	-0.992083	6.21759	0.00128823	0.187479	3.AD/1.YC	GABA_neurons
chr11:83285725-83286650	ENSG00000255234_AP000446.1,0;ENSG00000137500_CCDC90B,0	ENSG00000137500_CCDC90B,0;ENSG00000255234_AP000446.1,0	-1.37086	5.57642	3.36738e-05	0.0608391	3.AD/1.YC	GABA_neurons
chr11:84316860-84317701		ENSG00000150672_DLG2,1310221	-1.42528	3.97175	0.00215797	0.221293	3.AD/1.YC	GABA_neurons
chr11:86068713-86069611	ENSG00000073921_PICALM,271	ENSG00000073921_PICALM,271	-0.966564	5.51379	0.00263507	0.231611	3.AD/1.YC	GABA_neurons
chr11:86244538-86245336	ENSG00000074266_EED,0	ENSG00000074266_EED,0	-0.989434	5.20122	0.00286536	0.236386	3.AD/1.YC	GABA_neurons
chr11:87660755-87661637			-3.26987	2.03527	0.00286553	0.236386	3.AD/1.YC	GABA_neurons
chr11:90204622-90205520		ENSG00000110172_CHORDC1,17557	-2.82164	2.43039	0.00106683	0.179084	3.AD/1.YC	GABA_neurons
chr11:95789354-95790140	ENSG00000166037_CEP57,0;ENSG00000077458_FAM76B,269	ENSG00000166037_CEP57,0;ENSG00000077458_FAM76B,269	-0.997423	5.7028	0.00165074	0.204378	3.AD/1.YC	GABA_neurons
chr11:100202836-100203496		ENSG00000149972_CNTN5,1181887	-7.17467	1.54864	0.00150173	0.197893	3.AD/1.YC	GABA_neurons
chr11:106456396-106457270			-7.58191	1.88884	0.000172202	0.108035	3.AD/1.YC	GABA_neurons
chr11:108957906-108958802	ENSG00000203334_AP003027.1,188	ENSG00000203334_AP003027.1,188	-3.46115	2.14214	0.000831986	0.170867	3.AD/1.YC	GABA_neurons
chr11:109342830-109343750			-2.96934	2.26551	0.00192919	0.215676	3.AD/1.YC	GABA_neurons
chr11:111230124-111231019			-1.86721	3.31822	0.00188989	0.21481	3.AD/1.YC	GABA_neurons
chr11:114163816-114164689		ENSG00000109906_ZBTB16,104105	-1.82291	3.69037	0.000505316	0.14834	3.AD/1.YC	GABA_neurons
chr11:115334584-115335467	ENSG00000287897_AP000465.1,-1166;ENSG00000256972_AP000462.3,1007	ENSG00000256972_AP000462.3,1007;ENSG00000182985_CADM1,169490	-7.04217	1.36332	0.00266605	0.231611	3.AD/1.YC	GABA_neurons
chr11:117098070-117098931	ENSG00000224077_AP000936.1,-56;ENSG00000160584_SIK3,0	ENSG00000160584_SIK3,0	-0.956361	5.65505	0.00270703	0.232554	3.AD/1.YC	GABA_neurons
chr11:118435851-118436763	ENSG00000255384_AP001267.2,-645;ENSG00000118058_KMT2A,0	ENSG00000118058_KMT2A,0	-1.02144	6.01694	0.000781514	0.169506	3.AD/1.YC	GABA_neurons
chr11:119056836-119057743	ENSG00000149428_HYOU1,0	ENSG00000149428_HYOU1,0	-1.07331	5.56913	0.000822435	0.170151	3.AD/1.YC	GABA_neurons
chr11:119084575-119085456	ENSG00000256269_HMBS,0	ENSG00000256269_HMBS,0	-1.11828	5.24878	0.000961129	0.176149	3.AD/1.YC	GABA_neurons
chr11:119095101-119095920	ENSG00000188486_H2AFX,0	ENSG00000188486_H2AFX,0	-1.17643	5.63483	0.000201455	0.112472	3.AD/1.YC	GABA_neurons
chr11:119099981-119100723	ENSG00000172375_C2CD2L,-1475	ENSG00000172269_DPAGT1,7608	-3.55839	2.24235	0.000772134	0.168257	3.AD/1.YC	GABA_neurons
chr11:121292303-121293201	ENSG00000109929_SC5D,0	ENSG00000109929_SC5D,0	-1.19758	5.12016	0.000451083	0.143742	3.AD/1.YC	GABA_neurons
chr11:121589724-121590646		ENSG00000137642_SORL1,137410	-3.49133	2.18297	0.0011645	0.183552	3.AD/1.YC	GABA_neurons
chr11:122212917-122213826		ENSG00000255248_MIR100HG,342895	-2.5449	2.54104	0.00265841	0.231611	3.AD/1.YC	GABA_neurons
chr11:123061965-123062860	ENSG00000288061_AP000926.2,0;ENSG00000109971_HSPA8,370	ENSG00000288061_AP000926.2,0;ENSG00000109971_HSPA8,370	-0.949013	6.12017	0.00243217	0.22814	3.AD/1.YC	GABA_neurons
chr11:124758129-124758992	ENSG00000250073_AP000866.2,-137	ENSG00000149564_ESAM,3298	-2.74862	2.45247	0.00223978	0.223766	3.AD/1.YC	GABA_neurons
chr11:129279107-129279971	ENSG00000134909_ARHGAP32,0	ENSG00000134909_ARHGAP32,0	-1.16396	4.96162	0.000834332	0.170867	3.AD/1.YC	GABA_neurons
chr11:130002383-130003254	ENSG00000170325_PRDM10,0;ENSG00000233220_LINC00167,0	ENSG00000170325_PRDM10,0;ENSG00000233220_LINC00167,0	-0.914903	6.06773	0.00252759	0.229325	3.AD/1.YC	GABA_neurons
chr11:131584791-131585507		ENSG00000182667_NTM,214313	-1.49217	4.18371	0.00130168	0.188319	3.AD/1.YC	GABA_neurons
chr12:750883-751652	ENSG00000060237_WNK1,-927		-1.47223	4.08074	0.00119368	0.184208	3.AD/1.YC	GABA_neurons
chr12:949362-950272		ENSG00000002016_RAD52,39781	-1.07734	5.46759	0.00102741	0.17753	3.AD/1.YC	GABA_neurons
chr12:6470375-6471302	ENSG00000139190_VAMP1,0	ENSG00000139190_VAMP1,0	-1.13523	6.04896	0.000333728	0.128432	3.AD/1.YC	GABA_neurons
chr12:6533889-6534669	ENSG00000255966_AC006064.3,-391;ENSG00000111640_GAPDH,0	ENSG00000111640_GAPDH,0	-0.936391	5.68676	0.0028591	0.236386	3.AD/1.YC	GABA_neurons
chr12:6662796-6663686	ENSG00000111653_ING4,0;ENSG00000219410_AC125494.1,0	ENSG00000111653_ING4,0;ENSG00000219410_AC125494.1,0	-1.03541	5.12362	0.00238002	0.227387	3.AD/1.YC	GABA_neurons
chr12:6723652-6724537	ENSG00000111652_COPS7A,0;ENSG00000270068_AC125494.3,419	ENSG00000111652_COPS7A,0;ENSG00000270068_AC125494.3,419	-1.0575	5.09001	0.00201991	0.218335	3.AD/1.YC	GABA_neurons
chr12:6943312-6944130	ENSG00000111678_C12orf57,334;ENSG00000272173_U47924.2,474	ENSG00000111678_C12orf57,334;ENSG00000272173_U47924.2,474	-1.13035	4.81307	0.00336851	0.249228	3.AD/1.YC	GABA_neurons
chr12:8026429-8027250			-1.12826	5.24194	0.000892408	0.174814	3.AD/1.YC	GABA_neurons
chr12:9115601-9116544	ENSG00000175899_A2M,0	ENSG00000175899_A2M,0	-3.65576	2.33152	0.000411464	0.139758	3.AD/1.YC	GABA_neurons
chr12:12331104-12331928		ENSG00000111261_MANSC1,18314	-2.51971	2.74677	0.00145087	0.195338	3.AD/1.YC	GABA_neurons
chr12:14047887-14048770			-7.88308	2.0368	1.62232e-05	0.0528242	3.AD/1.YC	GABA_neurons
chr12:15881867-15882796	ENSG00000151491_EPS8,0;ENSG00000023734_STRAP,0	ENSG00000151491_EPS8,0;ENSG00000023734_STRAP,0	-1.21071	5.30161	0.00037302	0.135395	3.AD/1.YC	GABA_neurons
chr12:22556842-22557671		ENSG00000250166_AC053513.1,147605	-7.21923	1.58278	0.0010132	0.17707	3.AD/1.YC	GABA_neurons
chr12:25385810-25386681	ENSG00000278743_AC087239.1,0	ENSG00000278743_AC087239.1,0	-1.16317	5.20077	0.000974966	0.176149	3.AD/1.YC	GABA_neurons
chr12:26937846-26938746	ENSG00000064102_INTS13,0;ENSG00000111790_FGFR1OP2,0	ENSG00000064102_INTS13,0;ENSG00000111790_FGFR1OP2,0	-1.00902	5.72654	0.00146401	0.196096	3.AD/1.YC	GABA_neurons
chr12:29158158-29159046	ENSG00000275278_AC012150.2,-1167;ENSG00000257258_AC012150.1,0	ENSG00000257258_AC012150.1,0;ENSG00000064763_FAR2,9055	-3.85011	2.45824	7.7738e-05	0.08124	3.AD/1.YC	GABA_neurons
chr12:34021963-34022863	ENSG00000139133_ALG10,0	ENSG00000139133_ALG10,0;ENSG00000245482_AC046130.1,23554	-1.21049	4.59173	0.00185419	0.213801	3.AD/1.YC	GABA_neurons
chr12:39993138-39993905		ENSG00000151229_SLC2A13,112184	-7.22201	1.51792	0.00107755	0.179617	3.AD/1.YC	GABA_neurons
chr12:42904450-42905334			-1.79254	3.26226	0.00289431	0.237516	3.AD/1.YC	GABA_neurons
chr12:44092065-44093012		ENSG00000139173_TMEM117,256098	-2.92349	2.58191	0.00103814	0.177881	3.AD/1.YC	GABA_neurons
chr12:44835659-44836498		ENSG00000184613_NELL2,85350	-2.39199	3.12016	0.000269462	0.120151	3.AD/1.YC	GABA_neurons
chr12:45727194-45727967	ENSG00000189079_ARID2,-1739;ENSG00000273015_AC008124.1,0	ENSG00000273015_AC008124.1,0	-1.33913	4.5536	0.000546498	0.154842	3.AD/1.YC	GABA_neurons
chr12:45728653-45729458	ENSG00000273015_AC008124.1,-878;ENSG00000189079_ARID2,-248		-1.41492	5.06332	4.86818e-05	0.0630777	3.AD/1.YC	GABA_neurons
chr12:48157104-48157954		ENSG00000177981_ASB8,23259	-1.27273	4.69331	0.000633075	0.161809	3.AD/1.YC	GABA_neurons
chr12:49188710-49189542	ENSG00000167553_TUBA1C,0;ENSG00000167552_TUBA1A,0	ENSG00000167552_TUBA1A,0;ENSG00000167553_TUBA1C,0	-0.963301	5.56797	0.00299075	0.240011	3.AD/1.YC	GABA_neurons
chr12:49564821-49565712		ENSG00000187778_MCRS1,2433	-2.51407	3.61166	1.86612e-05	0.0528242	3.AD/1.YC	GABA_neurons
chr12:49868903-49869837		ENSG00000135472_FAIM2,34380	-1.40971	4.0927	0.0016507	0.204378	3.AD/1.YC	GABA_neurons
chr12:51047646-51048582	ENSG00000050426_LETMD1,0	ENSG00000050426_LETMD1,0	-1.05819	5.44242	0.00142406	0.195233	3.AD/1.YC	GABA_neurons
chr12:51172667-51173526	ENSG00000135457_TFCP2,0	ENSG00000135457_TFCP2,0	-1.13984	5.03456	0.000987555	0.176149	3.AD/1.YC	GABA_neurons
chr12:51238491-51239415	ENSG00000183283_DAZAP2,0	ENSG00000183283_DAZAP2,0	-1.05593	5.6088	0.000983652	0.176149	3.AD/1.YC	GABA_neurons
chr12:52025304-52026192		ENSG00000123358_NR4A1,2472	-1.22506	4.56891	0.00158123	0.200738	3.AD/1.YC	GABA_neurons
chr12:53451657-53452382	ENSG00000197111_PCBP2,0	ENSG00000197111_PCBP2,0	-1.12019	5.31399	0.00138394	0.191849	3.AD/1.YC	GABA_neurons
chr12:53727157-53728077	ENSG00000012822_CALCOCO1,0	ENSG00000012822_CALCOCO1,0	-0.976487	5.69497	0.00178139	0.210548	3.AD/1.YC	GABA_neurons
chr12:54970476-54971314		ENSG00000135426_TESPA1,13448	-3.41236	2.13116	0.0016905	0.206983	3.AD/1.YC	GABA_neurons
chr12:55829285-55830163	ENSG00000135392_DNAJC14,661	ENSG00000135392_DNAJC14,661	-1.26445	5.38576	0.000139356	0.0993997	3.AD/1.YC	GABA_neurons
chr12:56221534-56222436	ENSG00000181852_RNF41,0;ENSG00000139579_NABP2,0	ENSG00000181852_RNF41,0;ENSG00000139579_NABP2,0	-1.08626	5.35726	0.000865915	0.17322	3.AD/1.YC	GABA_neurons
chr12:58537047-58537932			-3.98974	1.87681	0.003094	0.241619	3.AD/1.YC	GABA_neurons
chr12:63668144-63669076	ENSG00000177990_DPY19L2,0	ENSG00000177990_DPY19L2,0;ENSG00000249753_AC084357.2,126642	-1.16342	4.73034	0.00193034	0.215676	3.AD/1.YC	GABA_neurons
chr12:64221909-64222769	ENSG00000174206_C12orf66,0	ENSG00000174206_C12orf66,0	-1.22757	5.13076	0.000402865	0.139401	3.AD/1.YC	GABA_neurons
chr12:64587441-64588316		ENSG00000153179_RASSF3,80440	-3.37547	2.14463	0.0022308	0.223748	3.AD/1.YC	GABA_neurons
chr12:67268824-67269627	ENSG00000111530_CAND1,0	ENSG00000111530_CAND1,0	-0.929654	5.76565	0.00258685	0.230643	3.AD/1.YC	GABA_neurons
chr12:67852474-67853345			-3.36804	2.04614	0.00190822	0.215371	3.AD/1.YC	GABA_neurons
chr12:68301944-68302819		ENSG00000111554_MDM1,29562	-7.45319	1.76049	0.000268557	0.120151	3.AD/1.YC	GABA_neurons
chr12:69585085-69585959	ENSG00000166226_CCT2,0	ENSG00000166226_CCT2,0	-1.25153	5.13632	0.000267532	0.120151	3.AD/1.YC	GABA_neurons
chr12:71663544-71664438	ENSG00000173451_THAP2,0	ENSG00000173451_THAP2,0;ENSG00000133858_ZFC3H1,3287	-1.49408	5.26778	4.57074e-05	0.0609519	3.AD/1.YC	GABA_neurons
chr12:76084352-76085252	ENSG00000187109_NAP1L1,0	ENSG00000187109_NAP1L1,0	-0.941621	5.73055	0.00262818	0.231611	3.AD/1.YC	GABA_neurons
chr12:82526879-82527748			-2.41082	2.81432	0.00130535	0.188629	3.AD/1.YC	GABA_neurons
chr12:89352072-89352864	ENSG00000286608_AC010201.3,-934;ENSG00000139318_DUSP6,0;ENSG00000274021_AC024909.1,1057	ENSG00000139318_DUSP6,0;ENSG00000274021_AC024909.1,1057	-1.22739	4.7563	0.00117742	0.183552	3.AD/1.YC	GABA_neurons
chr12:90008076-90008926		ENSG00000258216_AC009522.1,296028	-4.19633	2.01613	0.000587321	0.156984	3.AD/1.YC	GABA_neurons
chr12:93677062-93677902	ENSG00000169372_CRADD,0	ENSG00000169372_CRADD,0	-1.29366	4.97275	0.000266139	0.120151	3.AD/1.YC	GABA_neurons
chr12:95003220-95004123	ENSG00000184752_NDUFA12,0	ENSG00000184752_NDUFA12,0	-1.17131	4.52369	0.00295568	0.239402	3.AD/1.YC	GABA_neurons
chr12:95276851-95277752		ENSG00000028203_VEZT,59105	-2.56794	2.49938	0.0019441	0.215676	3.AD/1.YC	GABA_neurons
chr12:98939252-98939965		ENSG00000257458_AC069437.1,7570;ENSG00000185046_ANKS1B,1044689	-7.1799	1.44055	0.00176871	0.21012	3.AD/1.YC	GABA_neurons
chr12:103929728-103930522	ENSG00000166598_HSP90B1,0	ENSG00000166598_HSP90B1,0	-1.03359	5.73642	0.0011848	0.183552	3.AD/1.YC	GABA_neurons
chr12:108150332-108151287		ENSG00000075035_WSCD2,21044	2.4467	2.69701	0.00152454	0.198941	3.AD/1.YC	GABA_neurons
chr12:108172889-108173722		ENSG00000075035_WSCD2,43601	2.32158	3.16953	0.000927495	0.175719	3.AD/1.YC	GABA_neurons
chr12:110280697-110281601	ENSG00000174437_ATP2A2,0	ENSG00000174437_ATP2A2,0	-0.975309	5.73535	0.00223623	0.223748	3.AD/1.YC	GABA_neurons
chr12:110353871-110354742			-2.76903	2.70166	0.000606117	0.159573	3.AD/1.YC	GABA_neurons
chr12:111274711-111275489		ENSG00000111249_CUX2,240546	-2.49296	2.70528	0.0011834	0.183552	3.AD/1.YC	GABA_neurons
chr12:113220859-113221755	ENSG00000186815_TPCN1,0;ENSG00000166578_IQCD,0	ENSG00000166578_IQCD,0;ENSG00000186815_TPCN1,0	-1.15832	5.98606	0.000147843	0.102475	3.AD/1.YC	GABA_neurons
chr12:113358180-113359040	ENSG00000151176_PLBD2,0;ENSG00000089060_SLC8B1,453	ENSG00000151176_PLBD2,0;ENSG00000089060_SLC8B1,453	-1.00701	5.21669	0.00249098	0.229325	3.AD/1.YC	GABA_neurons
chr12:116277311-116278144	ENSG00000123066_MED13L,0	ENSG00000123066_MED13L,0	-1.25966	5.09038	0.000223134	0.118057	3.AD/1.YC	GABA_neurons
chr12:116547893-116548653	ENSG00000258102_MAP1LC3B2,0	ENSG00000258102_MAP1LC3B2,0	-3.59202	2.26014	0.000567352	0.155891	3.AD/1.YC	GABA_neurons
chr12:116559107-116560024		ENSG00000258102_MAP1LC3B2,11002	-1.69782	3.3234	0.00330167	0.247896	3.AD/1.YC	GABA_neurons
chr12:117060281-117061178		ENSG00000088992_TESC,38301	1.91467	3.35907	0.00250767	0.229325	3.AD/1.YC	GABA_neurons
chr12:117124955-117125787		ENSG00000258285_TESC-AS1,25474	-1.60359	3.61147	0.00286702	0.236386	3.AD/1.YC	GABA_neurons
chr12:118375973-118376863	ENSG00000270482_AC026367.1,0;ENSG00000111707_SUDS3,0	ENSG00000270482_AC026367.1,0;ENSG00000111707_SUDS3,0	-1.26318	4.71964	0.000740037	0.167506	3.AD/1.YC	GABA_neurons
chr12:120200803-120201701	ENSG00000089157_RPLP0,0;ENSG00000255857_PXN-AS1,0	ENSG00000089157_RPLP0,0;ENSG00000255857_PXN-AS1,0	-1.06827	5.43545	0.000935474	0.175719	3.AD/1.YC	GABA_neurons
chr12:121802742-121803558	ENSG00000139718_SETD1B,-622;ENSG00000139725_RHOF,0;ENSG00000212694_LINC01089,348;ENSG00000274292_AC084018.2,1945	ENSG00000139725_RHOF,0;ENSG00000212694_LINC01089,348;ENSG00000274292_AC084018.2,1945	-1.14203	4.99487	0.000946927	0.175719	3.AD/1.YC	GABA_neurons
chr12:121888342-121889231	ENSG00000287493_AC069503.4,0;ENSG00000110801_PSMD9,0	ENSG00000287493_AC069503.4,0;ENSG00000110801_PSMD9,0	-0.964219	5.39697	0.00311715	0.242405	3.AD/1.YC	GABA_neurons
chr12:122225752-122226671	ENSG00000184047_DIABLO,785;ENSG00000284934_AC048338.2,863	ENSG00000184047_DIABLO,785;ENSG00000284934_AC048338.2,863	-0.93909	6.28499	0.00181696	0.211915	3.AD/1.YC	GABA_neurons
chr12:122526569-122527475	ENSG00000111011_RSRC2,0;ENSG00000184445_KNTC1,0	ENSG00000111011_RSRC2,0;ENSG00000184445_KNTC1,0	-1.26968	5.30951	0.000147333	0.102475	3.AD/1.YC	GABA_neurons
chr12:124916997-124917874	ENSG00000150991_UBC,0	ENSG00000150991_UBC,0	-1.09521	4.99735	0.00213173	0.221293	3.AD/1.YC	GABA_neurons
chr12:124939402-124940251			-1.28671	5.14594	0.000480472	0.14755	3.AD/1.YC	GABA_neurons
chr12:125015562-125016476		ENSG00000184992_BRI3BP,21917	-1.92505	3.27345	0.00163294	0.203593	3.AD/1.YC	GABA_neurons
chr12:128259148-128259791			-2.29011	2.94161	0.00144146	0.195338	3.AD/1.YC	GABA_neurons
chr12:130568341-130569174		ENSG00000060709_RIMBP2,147107	-2.79987	2.73488	0.000684142	0.164253	3.AD/1.YC	GABA_neurons
chr13:19605961-19606781			-3.2231	2.06075	0.00302626	0.240414	3.AD/1.YC	GABA_neurons
chr13:24967922-24968836			-3.40526	2.54099	0.000208037	0.112868	3.AD/1.YC	GABA_neurons
chr13:30617249-30618111	ENSG00000189403_HMGB1,0;ENSG00000132952_USPL1,0	ENSG00000189403_HMGB1,0;ENSG00000132952_USPL1,0	-1.12258	5.41322	0.000696253	0.165837	3.AD/1.YC	GABA_neurons
chr13:31042125-31043063			-2.23769	2.69878	0.00325625	0.246241	3.AD/1.YC	GABA_neurons
chr13:32538397-32539275	ENSG00000244754_N4BP2L2,0	ENSG00000244754_N4BP2L2,0	-1.15475	4.55188	0.00266106	0.231611	3.AD/1.YC	GABA_neurons
chr13:32585986-32586771	ENSG00000083642_PDS5B,0	ENSG00000083642_PDS5B,0	-1.12897	5.21515	0.000998096	0.176188	3.AD/1.YC	GABA_neurons
chr13:36346122-36347028	ENSG00000120664_SPART-AS1,0	ENSG00000120664_SPART-AS1,0;ENSG00000133104_SPART,23152	-1.39803	5.64888	9.96495e-06	0.0528242	3.AD/1.YC	GABA_neurons
chr13:37127378-37128293			-2.46056	2.66349	0.00159316	0.2015	3.AD/1.YC	GABA_neurons
chr13:41061281-41062121	ENSG00000120690_ELF1,0;ENSG00000120688_WBP4,0	ENSG00000120690_ELF1,0;ENSG00000120688_WBP4,0	-1.22962	4.74558	0.00112566	0.181336	3.AD/1.YC	GABA_neurons
chr13:41263207-41264122	ENSG00000120662_MTRF1,0	ENSG00000120662_MTRF1,0	-1.19285	4.78844	0.00109846	0.180237	3.AD/1.YC	GABA_neurons
chr13:44141620-44142503		ENSG00000226519_LINC00390,5259;ENSG00000227258_SMIM2-AS1,31169	-1.03039	5.36415	0.00156407	0.200717	3.AD/1.YC	GABA_neurons
chr13:44436502-44437388		ENSG00000102804_TSC22D1,139759	-1.04945	5.27618	0.00154728	0.199818	3.AD/1.YC	GABA_neurons
chr13:44917737-44918620			-1.4197	5.23923	3.22507e-05	0.0608391	3.AD/1.YC	GABA_neurons
chr13:48037404-48038337	ENSG00000136159_NUDT15,0;ENSG00000136143_SUCLA2,0	ENSG00000136143_SUCLA2,0;ENSG00000136159_NUDT15,0	-1.17113	5.35092	0.000417731	0.139758	3.AD/1.YC	GABA_neurons
chr13:49443703-49444618	ENSG00000102547_CAB39L,0;ENSG00000136169_SETDB2,0	ENSG00000102547_CAB39L,0;ENSG00000136169_SETDB2,0	-1.04852	5.89964	0.000796465	0.169968	3.AD/1.YC	GABA_neurons
chr13:51583819-51584735	ENSG00000139668_WDFY2,0	ENSG00000139668_WDFY2,0	-0.944285	5.98945	0.00223777	0.223748	3.AD/1.YC	GABA_neurons
chr13:52652229-52653094	ENSG00000273723_AL139089.1,0;ENSG00000165416_SUGT1,0	ENSG00000273723_AL139089.1,0;ENSG00000165416_SUGT1,0	-1.15506	5.52167	0.00029956	0.123326	3.AD/1.YC	GABA_neurons
chr13:52949514-52950424			-2.32623	2.79418	0.0020758	0.22041	3.AD/1.YC	GABA_neurons
chr13:67052524-67053390		ENSG00000184226_PCDH9,177055	-2.92083	2.54944	0.00076522	0.167506	3.AD/1.YC	GABA_neurons
chr13:67230069-67230927	ENSG00000184226_PCDH9,0	ENSG00000184226_PCDH9,0	-0.978576	5.73398	0.00159754	0.201665	3.AD/1.YC	GABA_neurons
chr13:69496680-69497589			-7.15598	1.55064	0.00153421	0.198951	3.AD/1.YC	GABA_neurons
chr13:72864368-72865214		ENSG00000083535_PIBF1,82235	-7.61862	1.85414	0.000103189	0.0891526	3.AD/1.YC	GABA_neurons
chr13:75549118-75550036	ENSG00000188243_COMMD6,0;ENSG00000118939_UCHL3,0	ENSG00000188243_COMMD6,0;ENSG00000118939_UCHL3,0	-1.31697	5.25185	7.81383e-05	0.08124	3.AD/1.YC	GABA_neurons
chr13:76811902-76812762		ENSG00000285572_AL136441.1,33762	-3.98519	1.80473	0.00208523	0.22041	3.AD/1.YC	GABA_neurons
chr13:77326615-77327435	ENSG00000005810_MYCBP2,0	ENSG00000005810_MYCBP2,0	-1.06509	5.04436	0.00251301	0.229325	3.AD/1.YC	GABA_neurons
chr13:77573953-77574763		ENSG00000287270_AL137140.1,12049;ENSG00000136155_SCEL,38279	-7.33731	1.56318	0.000741988	0.167506	3.AD/1.YC	GABA_neurons
chr13:80106153-80107095			-7.39136	1.72639	0.000412476	0.139758	3.AD/1.YC	GABA_neurons
chr13:80753682-80754628		ENSG00000286746_AL590807.1,263109	-2.85375	2.49487	0.00172011	0.207502	3.AD/1.YC	GABA_neurons
chr13:86402953-86403857		ENSG00000287880_AL445207.1,58877	-1.68214	3.32291	0.00312521	0.24247	3.AD/1.YC	GABA_neurons
chr13:93861853-93862777		ENSG00000183098_GPC6,635046	-3.25837	2.04785	0.00264337	0.231611	3.AD/1.YC	GABA_neurons
chr13:95242993-95243896		ENSG00000125257_ABCC4,57579	2.51684	2.4237	0.00320235	0.244783	3.AD/1.YC	GABA_neurons
chr13:97433752-97434515	ENSG00000276573_AL442067.1,-1431;ENSG00000286416_AL442067.3,0;ENSG00000125249_RAP2A,0	ENSG00000286416_AL442067.3,0;ENSG00000125249_RAP2A,0	-1.01906	5.50047	0.00197427	0.21631	3.AD/1.YC	GABA_neurons
chr13:106903206-106904130	ENSG00000277863_AL162574.1,0	ENSG00000277863_AL162574.1,0	-7.21044	1.57605	0.00102207	0.177121	3.AD/1.YC	GABA_neurons
chr13:110712775-110713463	ENSG00000153487_ING1,39;ENSG00000134905_CARS2,140	ENSG00000153487_ING1,39;ENSG00000134905_CARS2,140	-1.18812	5.55217	0.000243539	0.118322	3.AD/1.YC	GABA_neurons
chr13:111431873-111432752			-2.99224	2.31635	0.0023791	0.227387	3.AD/1.YC	GABA_neurons
chr13:112929352-112929982		ENSG00000126217_MCF2L,34974	2.40674	2.55397	0.00303762	0.240414	3.AD/1.YC	GABA_neurons
chr13:113296705-113297608	ENSG00000185896_LAMP1,0	ENSG00000185896_LAMP1,0	-1.10264	4.88271	0.00212639	0.221293	3.AD/1.YC	GABA_neurons
chr13:114281243-114282152	ENSG00000169062_UPF3A,0	ENSG00000169062_UPF3A,0	-1.00311	5.508	0.00195385	0.215951	3.AD/1.YC	GABA_neurons
chr14:20454638-20455558	ENSG00000092094_OSGEP,0;ENSG00000100823_APEX1,0	ENSG00000092094_OSGEP,0;ENSG00000100823_APEX1,0	-1.00715	5.43604	0.00168827	0.206983	3.AD/1.YC	GABA_neurons
chr14:20682367-20683267	ENSG00000258818_RNASE4,-1293;ENSG00000214274_ANG,-910		-1.40955	5.47391	2.6265e-05	0.057058	3.AD/1.YC	GABA_neurons
chr14:21103498-21104347	ENSG00000165804_ZNF219,375	ENSG00000165804_ZNF219,375;ENSG00000232070_TMEM253,4561	-0.955248	5.60937	0.00254034	0.229325	3.AD/1.YC	GABA_neurons
chr14:22588958-22589852	ENSG00000129562_DAD1,0	ENSG00000129562_DAD1,0	-1.44356	4.59387	0.000186334	0.109905	3.AD/1.YC	GABA_neurons
chr14:22766369-22767267	ENSG00000155463_OXA1L,0;ENSG00000258458_AL160314.2,0	ENSG00000258458_AL160314.2,0;ENSG00000155463_OXA1L,0	-1.24729	4.29784	0.0033326	0.248511	3.AD/1.YC	GABA_neurons
chr14:22918856-22919713	ENSG00000237054_PRMT5-AS1,0;ENSG00000100461_RBM23,0	ENSG00000100461_RBM23,0;ENSG00000237054_PRMT5-AS1,0	-0.979717	5.78057	0.00157784	0.200738	3.AD/1.YC	GABA_neurons
chr14:23034552-23035488	ENSG00000100804_PSMB5,0	ENSG00000100804_PSMB5,0	-1.21648	5.02354	0.000585504	0.156984	3.AD/1.YC	GABA_neurons
chr14:23094802-23095682	ENSG00000179933_C14orf119,0;ENSG00000100813_ACIN1,0	ENSG00000100813_ACIN1,0;ENSG00000179933_C14orf119,0	-0.917177	5.80905	0.0030906	0.241604	3.AD/1.YC	GABA_neurons
chr14:23301328-23302233	ENSG00000215271_HOMEZ,-1881;ENSG00000235194_PPP1R3E,626	ENSG00000235194_PPP1R3E,626;ENSG00000129473_BCL2L2,2538	-1.03901	6.15056	0.000886702	0.174613	3.AD/1.YC	GABA_neurons
chr14:24114400-24115296	ENSG00000129535_NRL,0;ENSG00000100897_DCAF11,205	ENSG00000129535_NRL,0;ENSG00000100897_DCAF11,205	-1.01991	6.09221	0.000817374	0.169968	3.AD/1.YC	GABA_neurons
chr14:24146900-24147659	ENSG00000100911_PSME2,0;ENSG00000092098_RNF31,217	ENSG00000100911_PSME2,0;ENSG00000092098_RNF31,217	-1.14794	5.55198	0.000372168	0.135395	3.AD/1.YC	GABA_neurons
chr14:24212992-24213889	ENSG00000254505_CHMP4A,0	ENSG00000254505_CHMP4A,0	-1.11173	4.97797	0.00171593	0.207502	3.AD/1.YC	GABA_neurons
chr14:24442270-24443058	ENSG00000100445_SDR39U1,0;ENSG00000258744_AL132800.1,0	ENSG00000100445_SDR39U1,0;ENSG00000258744_AL132800.1,0	-0.996263	5.26462	0.00268807	0.232405	3.AD/1.YC	GABA_neurons
chr14:24805899-24806806			-7.77532	1.94003	4.15093e-05	0.0608391	3.AD/1.YC	GABA_neurons
chr14:25843755-25844689		ENSG00000257986_LINC02306,298616	-7.63247	1.9055	0.000105306	0.0903448	3.AD/1.YC	GABA_neurons
chr14:26597852-26598752	ENSG00000258081_AL110292.1,-1003;ENSG00000139910_NOVA1,0;ENSG00000257842_LINC02588,0	ENSG00000139910_NOVA1,0;ENSG00000257842_LINC02588,0	-0.975671	5.49945	0.00303763	0.240414	3.AD/1.YC	GABA_neurons
chr14:28608970-28609725		ENSG00000258175_LINC02300,3898	-1.93101	3.05496	0.0029932	0.240011	3.AD/1.YC	GABA_neurons
chr14:30260597-30261517		ENSG00000248975_AL133372.2,35526	2.15838	3.09921	0.00263005	0.231611	3.AD/1.YC	GABA_neurons
chr14:32203031-32203934	ENSG00000286527_AL161665.2,-1295		-1.35037	4.41945	0.000839848	0.170867	3.AD/1.YC	GABA_neurons
chr14:32509579-32510438		ENSG00000151320_AKAP6,180281	-1.74459	3.31073	0.00313841	0.242946	3.AD/1.YC	GABA_neurons
chr14:35291913-35292812		ENSG00000100902_PSMA6,13280	-0.995138	5.25143	0.00281783	0.236254	3.AD/1.YC	GABA_neurons
chr14:37819072-37819839		ENSG00000139865_TTC6,223225	-3.42149	2.08833	0.00125764	0.186119	3.AD/1.YC	GABA_neurons
chr14:38553486-38554345			-4.32376	2.14566	0.000501287	0.14834	3.AD/1.YC	GABA_neurons
chr14:39174681-39175591	ENSG00000100941_PNN,0;ENSG00000259083_AL132639.3,289	ENSG00000100941_PNN,0;ENSG00000259083_AL132639.3,289	-1.03597	5.33214	0.00152376	0.198941	3.AD/1.YC	GABA_neurons
chr14:40028722-40029613		ENSG00000258526_AL049828.1,596123	-3.17858	2.37907	0.000575507	0.155891	3.AD/1.YC	GABA_neurons
chr14:47526406-47527286		ENSG00000139915_MDGA2,148319	-3.26589	2.01645	0.00280894	0.236254	3.AD/1.YC	GABA_neurons
chr14:49862503-49863404	ENSG00000278002_AL627171.1,0;ENSG00000282885_AL627171.2,922	ENSG00000278002_AL627171.1,0;ENSG00000282885_AL627171.2,922	-1.22254	5.47774	0.000195808	0.111733	3.AD/1.YC	GABA_neurons
chr14:49892525-49893435	ENSG00000165527_ARF6,0	ENSG00000165527_ARF6,0	-1.0827	5.23284	0.00125945	0.186154	3.AD/1.YC	GABA_neurons
chr14:54509354-54510252	ENSG00000100532_CGRRF1,0	ENSG00000100532_CGRRF1,0	-0.986653	5.38598	0.00287158	0.236386	3.AD/1.YC	GABA_neurons
chr14:55129010-55129732		ENSG00000131981_LGALS3,4900	2.38894	2.75782	0.00228243	0.224427	3.AD/1.YC	GABA_neurons
chr14:56579285-56580171		ENSG00000070269_TMEM260,90931	-1.22286	5.05381	0.000437624	0.142412	3.AD/1.YC	GABA_neurons
chr14:58189028-58189919		ENSG00000139971_ARMH4,108220	-3.91572	1.78161	0.00303764	0.240414	3.AD/1.YC	GABA_neurons
chr14:60247626-60248353	ENSG00000254718_AL157756.1,412;ENSG00000100614_PPM1A,1874	ENSG00000254718_AL157756.1,412;ENSG00000100614_PPM1A,1874	-1.3803	4.01	0.00287284	0.236386	3.AD/1.YC	GABA_neurons
chr14:64540087-64540988	ENSG00000259116_AL049869.3,0	ENSG00000259116_AL049869.3,0;ENSG00000126803_HSPA2,4182	-1.06314	5.39899	0.00110747	0.180237	3.AD/1.YC	GABA_neurons
chr14:64986532-64987470	ENSG00000257365_FNTB,0	ENSG00000257365_FNTB,0	-1.12991	5.45045	0.000480432	0.14755	3.AD/1.YC	GABA_neurons
chr14:66507604-66508505	ENSG00000171723_GPHN,197;ENSG00000258561_AL359232.1,889	ENSG00000171723_GPHN,197;ENSG00000258561_AL359232.1,889	-0.930597	5.75779	0.00290857	0.23761	3.AD/1.YC	GABA_neurons
chr14:67359589-67360416	ENSG00000100554_ATP6V1D,0;ENSG00000134001_EIF2S1,0	ENSG00000100554_ATP6V1D,0;ENSG00000134001_EIF2S1,0	-1.01292	5.22667	0.00299208	0.240011	3.AD/1.YC	GABA_neurons
chr14:70809213-70810115	ENSG00000006432_MAP3K9,0;ENSG00000259153_AC004816.1,0	ENSG00000006432_MAP3K9,0;ENSG00000259153_AC004816.1,0	-0.953968	5.47994	0.00325063	0.246173	3.AD/1.YC	GABA_neurons
chr14:71488559-71489344		ENSG00000197555_SIPA1L1,168110	-7.79629	1.93785	4.20465e-05	0.0608391	3.AD/1.YC	GABA_neurons
chr14:73458218-73459095	ENSG00000133961_NUMB,0	ENSG00000133961_NUMB,0;ENSG00000284930_AC005280.2,7072	-1.0284	5.59253	0.00120809	0.184806	3.AD/1.YC	GABA_neurons
chr14:73713918-73714740	ENSG00000176903_PNMA1,0	ENSG00000176903_PNMA1,0	-1.08418	5.22808	0.00190805	0.215371	3.AD/1.YC	GABA_neurons
chr14:75176363-75177150	ENSG00000170348_TMED10,0;ENSG00000273565_AL691403.2,0	ENSG00000170348_TMED10,0;ENSG00000273565_AL691403.2,0	-1.07438	5.25658	0.00126547	0.186154	3.AD/1.YC	GABA_neurons
chr14:75198307-75199230			-1.91897	3.17894	0.00299571	0.240056	3.AD/1.YC	GABA_neurons
chr14:75258701-75259620	ENSG00000258820_AF111167.1,0	ENSG00000258820_AF111167.1,0;ENSG00000258740_AL691403.1,9663	-1.13753	5.59726	0.000313337	0.126452	3.AD/1.YC	GABA_neurons
chr14:75273285-75274206			-4.02953	2.57719	1.91579e-05	0.0528242	3.AD/1.YC	GABA_neurons
chr14:77040033-77040931	ENSG00000246548_LINC02288,-133		-1.26491	4.52751	0.00122317	0.184806	3.AD/1.YC	GABA_neurons
chr14:77457330-77458166	ENSG00000100591_AHSA1,0;ENSG00000151445_VIPAS39,0	ENSG00000151445_VIPAS39,0;ENSG00000100591_AHSA1,0	-1.06707	5.64236	0.000734308	0.167506	3.AD/1.YC	GABA_neurons
chr14:78403114-78404001		ENSG00000021645_NRXN3,232741	-2.33772	2.75125	0.00147842	0.19715	3.AD/1.YC	GABA_neurons
chr14:81220694-81221554	ENSG00000273783_AL136040.1,0;ENSG00000165417_GTF2A1,0	ENSG00000165417_GTF2A1,0;ENSG00000273783_AL136040.1,0	-1.01135	5.62776	0.00142374	0.195233	3.AD/1.YC	GABA_neurons
chr14:87111386-87112271			-7.72826	1.89042	6.58739e-05	0.0741438	3.AD/1.YC	GABA_neurons
chr14:87121624-87122516			-7.05134	1.48964	0.00243218	0.22814	3.AD/1.YC	GABA_neurons
chr14:90382856-90383769	ENSG00000275198_AL512791.2,0	ENSG00000275198_AL512791.2,0	-1.26437	5.50026	9.91084e-05	0.0891526	3.AD/1.YC	GABA_neurons
chr14:91510037-91510922	ENSG00000100796_PPP4R3A,0	ENSG00000100796_PPP4R3A,0	-0.943474	5.5925	0.00290672	0.23761	3.AD/1.YC	GABA_neurons
chr14:92793719-92794625	ENSG00000066455_GOLGA5,0	ENSG00000066455_GOLGA5,0	-0.96675	5.86488	0.00174695	0.20971	3.AD/1.YC	GABA_neurons
chr14:95534386-95535313	ENSG00000247092_SNHG10,0;ENSG00000182512_GLRX5,883	ENSG00000247092_SNHG10,0;ENSG00000182512_GLRX5,883	-1.37572	5.59163	1.56911e-05	0.0528242	3.AD/1.YC	GABA_neurons
chr14:99480668-99481597	ENSG00000183576_SETD3,0;ENSG00000090061_CCNK,0	ENSG00000183576_SETD3,0;ENSG00000090061_CCNK,0	-0.884819	6.38145	0.00331377	0.248046	3.AD/1.YC	GABA_neurons
chr14:101809613-101810478	ENSG00000259088_AL137779.2,0	ENSG00000259088_AL137779.2,0;ENSG00000078304_PPP2R5C,47815	-1.2582	4.36818	0.00207374	0.22041	3.AD/1.YC	GABA_neurons
chr14:103023780-103024584		ENSG00000198752_CDC42BPB,32965	-2.55926	2.52216	0.00180276	0.211334	3.AD/1.YC	GABA_neurons
chr14:104119888-104120721			-3.10512	2.41301	0.00151536	0.198834	3.AD/1.YC	GABA_neurons
chr14:105314187-105315086	ENSG00000185024_BRF1,503	ENSG00000185024_BRF1,503;ENSG00000179364_PACS2,13624	-1.15161	5.24205	0.000747652	0.167506	3.AD/1.YC	GABA_neurons
chr15:25438661-25439473	ENSG00000114062_UBE3A,0	ENSG00000114062_UBE3A,0	-1.03167	5.33825	0.00295371	0.239402	3.AD/1.YC	GABA_neurons
chr15:25557653-25558544		ENSG00000235731_LINC02250,20269	-4.19285	1.94493	0.000629136	0.16154	3.AD/1.YC	GABA_neurons
chr15:26133969-26134822		ENSG00000259150_LINC00929,18243	-7.42435	1.72606	0.000387411	0.136971	3.AD/1.YC	GABA_neurons
chr15:31953187-31953993		ENSG00000175344_CHRNA7,29749	-3.21046	2.01959	0.00284314	0.236386	3.AD/1.YC	GABA_neurons
chr15:37100144-37101025	ENSG00000134138_MEIS2,274;ENSG00000259460_AC078909.1,805	ENSG00000134138_MEIS2,274;ENSG00000259460_AC078909.1,805	-1.80705	3.32632	0.00195909	0.216081	3.AD/1.YC	GABA_neurons
chr15:38182626-38183502		ENSG00000259380_AC087473.1,43395	-3.68336	2.37934	0.000545436	0.154842	3.AD/1.YC	GABA_neurons
chr15:44194881-44195730	ENSG00000171877_FRMD5,0	ENSG00000171877_FRMD5,0	-0.999491	5.56625	0.00155279	0.199992	3.AD/1.YC	GABA_neurons
chr15:44288383-44289299	ENSG00000166734_CASC4,0	ENSG00000166734_CASC4,0	-1.50603	4.54749	0.000181382	0.108655	3.AD/1.YC	GABA_neurons
chr15:45198358-45199303	ENSG00000259932_AC051619.7,0;ENSG00000260035_AC051619.8,1329;ENSG00000138606_SHF,1872	ENSG00000259932_AC051619.7,0;ENSG00000138606_SHF,1872;ENSG00000259519_AC051619.4,28014	-1.21866	5.50856	0.000201042	0.112472	3.AD/1.YC	GABA_neurons
chr15:45586930-45587840	ENSG00000275709_AC090527.3,-626;ENSG00000104164_BLOC1S6,0	ENSG00000104164_BLOC1S6,0	-1.33307	5.04459	0.000195373	0.111733	3.AD/1.YC	GABA_neurons
chr15:47716825-47717718		ENSG00000137872_SEMA6D,532724	-1.23082	4.29674	0.00319121	0.244694	3.AD/1.YC	GABA_neurons
chr15:48925516-48926410		ENSG00000185634_SHC4,37509	-2.17934	2.93491	0.00126541	0.186154	3.AD/1.YC	GABA_neurons
chr15:50354603-50355546	ENSG00000285410_GABPB1-IT1,0;ENSG00000244879_GABPB1-AS1,0;ENSG00000104064_GABPB1,0	ENSG00000104064_GABPB1,0;ENSG00000285410_GABPB1-IT1,0;ENSG00000244879_GABPB1-AS1,0	-1.02779	5.14276	0.00220565	0.222348	3.AD/1.YC	GABA_neurons
chr15:51971250-51972190	ENSG00000166477_LEO1,0	ENSG00000166477_LEO1,0;ENSG00000069956_MAPK6,19144	-1.37969	4.77483	0.000203074	0.112561	3.AD/1.YC	GABA_neurons
chr15:56886821-56887735	ENSG00000276524_AC010999.2,0	ENSG00000276524_AC010999.2,0;ENSG00000285331_AC090517.5,30764	-1.11027	5.30031	0.00100031	0.176255	3.AD/1.YC	GABA_neurons
chr15:58465521-58466448		ENSG00000128918_ALDH1A2,31418;ENSG00000259293_LIPC-AS1,32287;ENSG00000166035_LIPC,54952	-7.32261	1.63294	0.000634827	0.161884	3.AD/1.YC	GABA_neurons
chr15:58770801-58771679	ENSG00000245975_AC090515.2,0;ENSG00000128923_MINDY2,0	ENSG00000245975_AC090515.2,0;ENSG00000128923_MINDY2,0	-1.05295	5.75494	0.00118644	0.183552	3.AD/1.YC	GABA_neurons
chr15:58987466-58988242		ENSG00000157450_RNF111,122291	-1.60585	4.05593	0.000474459	0.147363	3.AD/1.YC	GABA_neurons
chr15:59259844-59260740		ENSG00000157483_MYO1E,112131	-2.36154	2.57272	0.00300349	0.240414	3.AD/1.YC	GABA_neurons
chr15:63189001-63189902	ENSG00000166128_RAB8B,0	ENSG00000166128_RAB8B,0	-1.21187	5.45117	0.000245697	0.118322	3.AD/1.YC	GABA_neurons
chr15:64355762-64356672	ENSG00000169118_CSNK1G1,0	ENSG00000169118_CSNK1G1,0	-1.07207	5.31968	0.0010324	0.177642	3.AD/1.YC	GABA_neurons
chr15:64856518-64857436		ENSG00000241839_PLEKHO2,14635	-2.25197	3.19713	0.000721361	0.167506	3.AD/1.YC	GABA_neurons
chr15:65304128-65304948			-1.26588	4.50157	0.00141542	0.194892	3.AD/1.YC	GABA_neurons
chr15:65325815-65326739			2.48474	3.0733	0.000270302	0.120151	3.AD/1.YC	GABA_neurons
chr15:66497346-66498229	ENSG00000174446_SNAPC5,0	ENSG00000174446_SNAPC5,0;ENSG00000174444_RPL4,26303	-1.29225	4.22407	0.00229385	0.224427	3.AD/1.YC	GABA_neurons
chr15:68817311-68818133	ENSG00000258484_SPESP1,-88	ENSG00000140350_ANP32A,2764	-1.79889	4.17106	6.5866e-05	0.0741438	3.AD/1.YC	GABA_neurons
chr15:69452420-69453319	ENSG00000137818_RPLP1,0	ENSG00000137818_RPLP1,0	-1.01839	5.37188	0.0019179	0.215628	3.AD/1.YC	GABA_neurons
chr15:70892152-70893066	ENSG00000129028_THAP10,0	ENSG00000129028_THAP10,0;ENSG00000137821_LRRC49,38913	-1.21753	4.97572	0.000558807	0.15553	3.AD/1.YC	GABA_neurons
chr15:72783389-72784269	ENSG00000260898_ADPGK-AS1,554;ENSG00000159322_ADPGK,1577	ENSG00000260898_ADPGK-AS1,554;ENSG00000159322_ADPGK,1577	-1.00348	5.42759	0.00207633	0.22041	3.AD/1.YC	GABA_neurons
chr15:72826904-72827743			-7.3411	1.71533	0.00065166	0.162591	3.AD/1.YC	GABA_neurons
chr15:74156466-74157384		ENSG00000261543_AC010931.3,21842	-1.97206	3.17611	0.00150841	0.198347	3.AD/1.YC	GABA_neurons
chr15:74540660-74541558	ENSG00000179361_ARID3B,0	ENSG00000179361_ARID3B,0	-1.26951	4.52435	0.00124496	0.185136	3.AD/1.YC	GABA_neurons
chr15:75043434-75044358		ENSG00000138621_PPCDC,19848	-1.66265	3.72021	0.00169644	0.207296	3.AD/1.YC	GABA_neurons
chr15:75453814-75454681	ENSG00000276744_AC105137.2,0;ENSG00000169375_SIN3A,1161	ENSG00000276744_AC105137.2,0;ENSG00000169375_SIN3A,1161	-1.07446	5.98392	0.00075543	0.167506	3.AD/1.YC	GABA_neurons
chr15:76931247-76932124	ENSG00000117906_RCN2,0	ENSG00000117906_RCN2,0	-1.04666	5.59736	0.00104423	0.178169	3.AD/1.YC	GABA_neurons
chr15:77419848-77420701	ENSG00000173517_PEAK1,0;ENSG00000140382_HMG20A,0	ENSG00000173517_PEAK1,0;ENSG00000140382_HMG20A,0	-1.08337	5.36928	0.00214451	0.221293	3.AD/1.YC	GABA_neurons
chr15:77543023-77543908			-1.70701	3.73704	0.000897778	0.175044	3.AD/1.YC	GABA_neurons
chr15:77819068-77819891	ENSG00000169783_LINGO1,1009	ENSG00000169783_LINGO1,1009	-1.20264	4.62078	0.0020791	0.22041	3.AD/1.YC	GABA_neurons
chr15:78437725-78438640	ENSG00000136381_IREB2,294	ENSG00000136381_IREB2,294	-1.07248	5.34355	0.00123416	0.185136	3.AD/1.YC	GABA_neurons
chr15:80059191-80060071	ENSG00000086666_ZFAND6,0	ENSG00000086666_ZFAND6,0	-0.961146	5.66256	0.00228466	0.224427	3.AD/1.YC	GABA_neurons
chr15:80822442-80823242		ENSG00000103888_CEMIP,43099	-3.12292	2.30676	0.00107243	0.179359	3.AD/1.YC	GABA_neurons
chr15:81235940-81236865		ENSG00000172349_IL16,76365	-7.5364	1.84505	0.000176238	0.108035	3.AD/1.YC	GABA_neurons
chr15:82045676-82046450	ENSG00000183496_MEX3B,0	ENSG00000183496_MEX3B,0	-1.17776	5.06473	0.000564198	0.155891	3.AD/1.YC	GABA_neurons
chr15:85618734-85619603		ENSG00000170776_AKAP13,238163	-2.57241	2.57609	0.00273711	0.233927	3.AD/1.YC	GABA_neurons
chr15:86916631-86917440		ENSG00000273540_AGBL1,836658	-1.81373	3.66132	0.000573573	0.155891	3.AD/1.YC	GABA_neurons
chr15:87489297-87490168		ENSG00000259560_AC020687.1,213684	-4.29632	2.10384	0.000639533	0.162109	3.AD/1.YC	GABA_neurons
chr15:89087854-89088772	ENSG00000261407_AC013565.3,0;ENSG00000140526_ABHD2,395	ENSG00000261407_AC013565.3,0;ENSG00000140526_ABHD2,395	-1.13164	5.85702	0.000236144	0.118322	3.AD/1.YC	GABA_neurons
chr15:89490404-89491173		ENSG00000140519_RHCG,5416	-2.90807	2.52129	0.000750195	0.167506	3.AD/1.YC	GABA_neurons
chr15:91118432-91119286		ENSG00000185518_SV2B,18482	-3.97696	1.9078	0.00331362	0.248046	3.AD/1.YC	GABA_neurons
chr15:95327711-95328440	ENSG00000248441_LINC01197,-582;ENSG00000259134_LINC00924,1183	ENSG00000259134_LINC00924,1183	-7.18417	1.53952	0.00105456	0.178275	3.AD/1.YC	GABA_neurons
chr15:98648067-98648936	ENSG00000259424_IRAIN,-696;ENSG00000140443_IGF1R,0	ENSG00000140443_IGF1R,0	-1.3059	5.23922	0.000119631	0.0959265	3.AD/1.YC	GABA_neurons
chr15:98852031-98852912		ENSG00000140443_IGF1R,203492	-1.11916	5.18466	0.00127631	0.186853	3.AD/1.YC	GABA_neurons
chr15:100863600-100864469	ENSG00000259604_AC015712.4,1757	ENSG00000259604_AC015712.4,1757	-2.72423	2.5988	0.000590283	0.157129	3.AD/1.YC	GABA_neurons
chr16:1964443-1965332	ENSG00000179580_RNF151,-1491;ENSG00000140988_RPS2,0;ENSG00000255198_SNHG9,0	ENSG00000140988_RPS2,0;ENSG00000255198_SNHG9,0	-1.08837	5.59309	0.000800731	0.169968	3.AD/1.YC	GABA_neurons
chr16:2101209-2101896		ENSG00000008710_PKD1,34002	-7.17554	1.51554	0.00152958	0.198941	3.AD/1.YC	GABA_neurons
chr16:2267825-2268706	ENSG00000260778_AC009065.4,0;ENSG00000205937_RNPS1,0	ENSG00000205937_RNPS1,0;ENSG00000260778_AC009065.4,0	-1.0223	5.54159	0.00137182	0.191849	3.AD/1.YC	GABA_neurons
chr16:2699161-2699939		ENSG00000167977_KCTD5,16638	-1.80988	3.53851	0.00107972	0.179735	3.AD/1.YC	GABA_neurons
chr16:4416248-4417140		ENSG00000262246_CORO7,8565	-0.991622	5.41186	0.00219951	0.222348	3.AD/1.YC	GABA_neurons
chr16:5020267-5021153		ENSG00000267072_NAGPA-AS1,9358	-1.65143	3.65294	0.00195985	0.216081	3.AD/1.YC	GABA_neurons
chr16:5604539-5605441		ENSG00000260338_LINC01570,10932;ENSG00000078328_RBFOX1,364737	-2.34273	2.80082	0.00234026	0.225895	3.AD/1.YC	GABA_neurons
chr16:6921926-6922830		ENSG00000078328_RBFOX1,1682124	-2.9622	2.26261	0.00207896	0.22041	3.AD/1.YC	GABA_neurons
chr16:8373445-8374381		ENSG00000259819_AC018767.1,3581	-4.09204	2.62418	2.05102e-05	0.0535378	3.AD/1.YC	GABA_neurons
chr16:9091057-9091960	ENSG00000182831_C16orf72,0	ENSG00000182831_C16orf72,0	-0.959614	5.86269	0.00193283	0.215676	3.AD/1.YC	GABA_neurons
chr16:13178106-13179001		ENSG00000237515_SHISA9,276508	-3.27673	2.07533	0.0020095	0.217928	3.AD/1.YC	GABA_neurons
chr16:14632421-14633330	ENSG00000140694_PARN,0;ENSG00000103429_BFAR,0	ENSG00000140694_PARN,0;ENSG00000103429_BFAR,0	-1.07088	4.91595	0.00239203	0.227491	3.AD/1.YC	GABA_neurons
chr16:22195431-22196360			-1.20683	4.98046	0.000944969	0.175719	3.AD/1.YC	GABA_neurons
chr16:22296912-22297791	ENSG00000058600_POLR3E,0	ENSG00000058600_POLR3E,0	-1.04696	5.59638	0.000925869	0.175719	3.AD/1.YC	GABA_neurons
chr16:27330330-27331248		ENSG00000077238_IL4R,16662	-3.37218	2.10632	0.00231778	0.225142	3.AD/1.YC	GABA_neurons
chr16:28846049-28846964	ENSG00000178952_TUFM,0;ENSG00000178188_SH2B1,0	ENSG00000178952_TUFM,0;ENSG00000178188_SH2B1,0	-0.976634	5.42241	0.00246562	0.228725	3.AD/1.YC	GABA_neurons
chr16:29920392-29921268		ENSG00000174943_KCTD13,4968	-1.64386	3.77011	0.00146312	0.196096	3.AD/1.YC	GABA_neurons
chr16:30417554-30418430		ENSG00000179965_ZNF771,10140	-1.04292	5.11416	0.00220263	0.222348	3.AD/1.YC	GABA_neurons
chr16:30650220-30651137	ENSG00000156858_PRR14,0	ENSG00000156858_PRR14,0	-0.96732	5.65086	0.00261722	0.231501	3.AD/1.YC	GABA_neurons
chr16:30922448-30923007	ENSG00000099364_FBXL19,-48;ENSG00000260852_FBXL19-AS1,262	ENSG00000260852_FBXL19-AS1,262	-1.06584	5.61504	0.00122296	0.184806	3.AD/1.YC	GABA_neurons
chr16:31459237-31460061	ENSG00000260267_AC026471.1,0;ENSG00000140691_ARMC5,1157	ENSG00000260267_AC026471.1,0;ENSG00000140691_ARMC5,1157	-1.1432	5.95375	0.000277373	0.121212	3.AD/1.YC	GABA_neurons
chr16:50024750-50025642	ENSG00000205423_CNEP1R1,340	ENSG00000205423_CNEP1R1,340	-1.21761	4.97069	0.000441499	0.142539	3.AD/1.YC	GABA_neurons
chr16:53503004-53503910	ENSG00000166971_AKTIP,501	ENSG00000166971_AKTIP,501	-0.896349	6.24764	0.00265087	0.231611	3.AD/1.YC	GABA_neurons
chr16:56194078-56194961	ENSG00000261439_AC079411.1,0	ENSG00000261439_AC079411.1,0;ENSG00000087258_GNAO1,2589	-1.16192	4.74299	0.00148941	0.197543	3.AD/1.YC	GABA_neurons
chr16:57403852-57404793	ENSG00000102970_CCL17,0	ENSG00000102970_CCL17,0	-2.52712	2.51315	0.00322748	0.245317	3.AD/1.YC	GABA_neurons
chr16:68909764-68910640		ENSG00000103047_TANGO6,66233	2.83919	2.58175	0.00230493	0.224427	3.AD/1.YC	GABA_neurons
chr16:69565494-69566300	ENSG00000102908_NFAT5,400	ENSG00000102908_NFAT5,400	-1.10475	5.13014	0.00113603	0.181474	3.AD/1.YC	GABA_neurons
chr16:70121612-70122385		ENSG00000090857_PDPR,7986	3.02098	2.39169	0.0022028	0.222348	3.AD/1.YC	GABA_neurons
chr16:72093317-72094226	ENSG00000140829_DHX38,0;ENSG00000140830_TXNL4B,205	ENSG00000140829_DHX38,0;ENSG00000140830_TXNL4B,205	-1.0963	5.36361	0.00132873	0.189694	3.AD/1.YC	GABA_neurons
chr16:75433003-75433944	ENSG00000153774_CFDP1,0;ENSG00000274220_AC009163.7,0	ENSG00000153774_CFDP1,0;ENSG00000274220_AC009163.7,0	-1.00934	5.03071	0.00306683	0.241187	3.AD/1.YC	GABA_neurons
chr16:75647420-75648241	ENSG00000166848_TERF2IP,0;ENSG00000065427_KARS,402	ENSG00000166848_TERF2IP,0;ENSG00000065427_KARS,402	-1.03082	5.24219	0.00327197	0.246723	3.AD/1.YC	GABA_neurons
chr16:75653618-75654485		ENSG00000166848_TERF2IP,5845	-2.02725	3.00359	0.00217554	0.221293	3.AD/1.YC	GABA_neurons
chr16:81006836-81007685	ENSG00000166451_CENPN,338	ENSG00000166451_CENPN,338;ENSG00000103121_CMC2,12585	-1.01716	6.09446	0.000745439	0.167506	3.AD/1.YC	GABA_neurons
chr16:84116459-84117390	ENSG00000140943_MBTPS1,0;ENSG00000260018_AC040169.1,0	ENSG00000140943_MBTPS1,0;ENSG00000260018_AC040169.1,0	-1.15241	5.36106	0.000505413	0.14834	3.AD/1.YC	GABA_neurons
chr16:87200923-87201688		ENSG00000260456_C16orf95,115732	-7.27755	1.65563	0.000680583	0.163719	3.AD/1.YC	GABA_neurons
chr16:89602152-89603094			-1.54031	3.70455	0.00308825	0.241604	3.AD/1.YC	GABA_neurons
chr16:89949515-89950407	ENSG00000140995_DEF8,1590	ENSG00000140995_DEF8,1590	1.70197	3.68364	0.00110693	0.180237	3.AD/1.YC	GABA_neurons
chr17:409776-410698	ENSG00000187624_C17orf97,0	ENSG00000187624_C17orf97,0;ENSG00000241525_AC141424.1,3325	-1.09795	4.9122	0.00219827	0.222348	3.AD/1.YC	GABA_neurons
chr17:1455890-1456740		ENSG00000167193_CRK,6422	-0.957047	5.69051	0.00254888	0.229325	3.AD/1.YC	GABA_neurons
chr17:1516298-1517215	ENSG00000132376_INPP5K,0;ENSG00000236618_PITPNA-AS1,0	ENSG00000132376_INPP5K,0;ENSG00000236618_PITPNA-AS1,0	-1.08809	5.62758	0.000652955	0.162591	3.AD/1.YC	GABA_neurons
chr17:2401083-2401899	ENSG00000070444_MNT,0	ENSG00000070444_MNT,0	-0.967927	6.03622	0.00158858	0.201128	3.AD/1.YC	GABA_neurons
chr17:3684870-3685682		ENSG00000083454_P2RX5,10558	2.35765	2.73669	0.00253178	0.229325	3.AD/1.YC	GABA_neurons
chr17:4142725-4143431	ENSG00000074755_ZZEF1,0;ENSG00000167740_CYB5D2,0	ENSG00000074755_ZZEF1,0;ENSG00000167740_CYB5D2,0	-1.25447	4.69689	0.000814297	0.169968	3.AD/1.YC	GABA_neurons
chr17:4710004-4710893	ENSG00000141480_ARRB2,0	ENSG00000141480_ARRB2,0	-0.930903	6.03539	0.00254318	0.229325	3.AD/1.YC	GABA_neurons
chr17:4731076-4731975	ENSG00000161920_MED11,0;ENSG00000261898_AC091153.4,396	ENSG00000161920_MED11,0;ENSG00000261898_AC091153.4,396	-1.14379	5.26915	0.00066223	0.162591	3.AD/1.YC	GABA_neurons
chr17:4939735-4940618	ENSG00000108523_RNF167,0;ENSG00000108528_SLC25A11,0	ENSG00000108528_SLC25A11,0;ENSG00000108523_RNF167,0	-1.31836	5.36721	0.000109086	0.0916328	3.AD/1.YC	GABA_neurons
chr17:5419435-5420310	ENSG00000129197_RPAIN,0;ENSG00000108559_NUP88,0	ENSG00000108559_NUP88,0;ENSG00000129197_RPAIN,0	-1.2249	5.26231	0.000316381	0.126518	3.AD/1.YC	GABA_neurons
chr17:5628790-5629714			-2.69457	2.27203	0.00239878	0.227822	3.AD/1.YC	GABA_neurons
chr17:7014385-7015281	ENSG00000215067_ALOX12-AS1,-1855;ENSG00000258315_C17orf49,0;ENSG00000219200_RNASEK,1968	ENSG00000258315_C17orf49,0;ENSG00000219200_RNASEK,1968	-1.0937	5.82582	0.000942809	0.175719	3.AD/1.YC	GABA_neurons
chr17:7219461-7220329	ENSG00000132535_DLG4,0	ENSG00000132535_DLG4,0;ENSG00000072778_ACADVL,2336	-1.1667	4.62326	0.0026169	0.231501	3.AD/1.YC	GABA_neurons
chr17:7239176-7240082	ENSG00000040633_PHF23,0	ENSG00000040633_PHF23,0;ENSG00000170296_GABARAP,2367	-1.05576	5.67096	0.000687871	0.164826	3.AD/1.YC	GABA_neurons
chr17:7251689-7252555	ENSG00000175826_CTDNEP1,0;ENSG00000170291_ELP5,273	ENSG00000175826_CTDNEP1,0;ENSG00000170291_ELP5,273	-1.33736	5.60714	4.47214e-05	0.0609519	3.AD/1.YC	GABA_neurons
chr17:7306898-7307806	ENSG00000132507_EIF5A,0	ENSG00000132507_EIF5A,0	-1.09379	5.41904	0.000881577	0.174613	3.AD/1.YC	GABA_neurons
chr17:7329057-7329906	ENSG00000215041_NEURL4,0	ENSG00000215041_NEURL4,0	-1.23261	5.25969	0.000619665	0.160995	3.AD/1.YC	GABA_neurons
chr17:7403975-7404764	ENSG00000169992_NLGN2,-110;ENSG00000205544_TMEM256,0	ENSG00000205544_TMEM256,0	-0.940903	6.05732	0.00199173	0.216672	3.AD/1.YC	GABA_neurons
chr17:7484258-7484942	ENSG00000174282_ZBTB4,0;ENSG00000181222_POLR2A,0	ENSG00000174282_ZBTB4,0;ENSG00000181222_POLR2A,0	-1.43493	5.30762	1.94588e-05	0.0528242	3.AD/1.YC	GABA_neurons
chr17:7573513-7574279	ENSG00000161960_EIF4A1,807	ENSG00000161960_EIF4A1,807	-1.22098	4.57556	0.00214137	0.221293	3.AD/1.YC	GABA_neurons
chr17:7614617-7615488	ENSG00000129245_FXR2,0;ENSG00000129214_SHBG,671	ENSG00000129245_FXR2,0;ENSG00000129214_SHBG,671	-1.25216	5.70645	8.81969e-05	0.0838787	3.AD/1.YC	GABA_neurons
chr17:7685834-7686766	ENSG00000141499_WRAP53,0;ENSG00000141510_TP53,784	ENSG00000141499_WRAP53,0;ENSG00000141510_TP53,784	-1.11257	5.27858	0.000783905	0.169506	3.AD/1.YC	GABA_neurons
chr17:7687851-7688715	ENSG00000141510_TP53,-301;ENSG00000141499_WRAP53,1780	ENSG00000141499_WRAP53,1780	-1.234	5.06737	0.000426708	0.140726	3.AD/1.YC	GABA_neurons
chr17:7841597-7842393	ENSG00000132510_KDM6B,1693	ENSG00000132510_KDM6B,1693	-1.21243	4.73888	0.00110799	0.180237	3.AD/1.YC	GABA_neurons
chr17:7857029-7857895	ENSG00000182224_CYB5D1,0;ENSG00000167874_TMEM88,1963	ENSG00000182224_CYB5D1,0;ENSG00000183011_NAA38,27343	-1.19763	5.37934	0.000325591	0.12686	3.AD/1.YC	GABA_neurons
chr17:8186514-8187134			-1.06144	5.02653	0.00225049	0.224138	3.AD/1.YC	GABA_neurons
chr17:8222634-8223442	ENSG00000178977_LINC00324,601	ENSG00000178977_LINC00324,601	-1.11661	5.14963	0.0013147	0.188851	3.AD/1.YC	GABA_neurons
chr17:8435483-8436353		ENSG00000166579_NDEL1,22352	-1.01329	5.67834	0.00143179	0.195278	3.AD/1.YC	GABA_neurons
chr17:8630567-8631443	ENSG00000133026_MYH10,0	ENSG00000133026_MYH10,0	-1.02874	5.84654	0.00111259	0.180516	3.AD/1.YC	GABA_neurons
chr17:8658545-8659462			-3.26156	2.07978	0.00280475	0.236254	3.AD/1.YC	GABA_neurons
chr17:9928605-9929513		ENSG00000007237_GAS7,269038	-2.54547	2.53703	0.00243233	0.22814	3.AD/1.YC	GABA_neurons
chr17:15266371-15267294	ENSG00000109099_PMP22,-1045;ENSG00000286792_AC005703.7,0	ENSG00000286792_AC005703.7,0	-2.75098	2.43827	0.00223753	0.223748	3.AD/1.YC	GABA_neurons
chr17:15457093-15457994		ENSG00000239704_CDRT4,45614	-3.37359	2.10512	0.00250506	0.229325	3.AD/1.YC	GABA_neurons
chr17:16380506-16381381	ENSG00000170315_UBB,0;ENSG00000265401_AC093484.3,1288	ENSG00000170315_UBB,0	-1.15222	4.8653	0.00143	0.195278	3.AD/1.YC	GABA_neurons
chr17:17280570-17281391	ENSG00000141030_COPS3,0	ENSG00000141030_COPS3,0	-1.01675	5.49981	0.00185774	0.213801	3.AD/1.YC	GABA_neurons
chr17:19377841-19378687	ENSG00000108641_B9D1,0;ENSG00000166484_MAPK7,120	ENSG00000108641_B9D1,0;ENSG00000166484_MAPK7,120	-0.967342	5.99807	0.0015268	0.198941	3.AD/1.YC	GABA_neurons
chr17:19507544-19508416		ENSG00000142494_SLC47A1,12159	-1.28016	4.97432	0.000283219	0.121715	3.AD/1.YC	GABA_neurons
chr17:19510674-19511597		ENSG00000142494_SLC47A1,15289	-2.92653	2.553	0.000550029	0.15505	3.AD/1.YC	GABA_neurons
chr17:27293753-27294569	ENSG00000109046_WSB1,0	ENSG00000109046_WSB1,0	-1.04293	5.14069	0.00202934	0.218762	3.AD/1.YC	GABA_neurons
chr17:28041080-28041945	ENSG00000087095_NLK,0	ENSG00000087095_NLK,0	-0.948939	6.03122	0.00240808	0.228038	3.AD/1.YC	GABA_neurons
chr17:28951156-28951946	ENSG00000109118_PHF12,0;ENSG00000179761_PIPOX,643	ENSG00000109118_PHF12,0;ENSG00000179761_PIPOX,643	-1.2146	5.0481	0.000551023	0.15505	3.AD/1.YC	GABA_neurons
chr17:29293768-29294680	ENSG00000108256_NUFIP2,0	ENSG00000108256_NUFIP2,0	-1.05514	5.80027	0.000986178	0.176149	3.AD/1.YC	GABA_neurons
chr17:30708471-30709323			-1.08735	5.07451	0.00150576	0.198211	3.AD/1.YC	GABA_neurons
chr17:30731283-30732146	ENSG00000263603_AC127024.2,1814		-1.36091	4.29955	0.00126481	0.186154	3.AD/1.YC	GABA_neurons
chr17:35586940-35587829		ENSG00000006125_AP2B1,8894	-1.3295	4.34361	0.00138106	0.191849	3.AD/1.YC	GABA_neurons
chr17:36736477-36737301			-3.48605	2.22257	0.00124233	0.185136	3.AD/1.YC	GABA_neurons
chr17:36948479-36949389	ENSG00000275700_AATF,0	ENSG00000275700_AATF,0	-1.08568	4.87807	0.00227754	0.224427	3.AD/1.YC	GABA_neurons
chr17:38869426-38870221	ENSG00000002834_LASP1,0	ENSG00000002834_LASP1,0	-1.04421	5.61476	0.00129667	0.188038	3.AD/1.YC	GABA_neurons
chr17:39450837-39451740	ENSG00000125686_MED1,0	ENSG00000125686_MED1,0	-1.29159	4.26284	0.00228607	0.224427	3.AD/1.YC	GABA_neurons
chr17:41918684-41919588		ENSG00000131473_ACLY,10954	-1.03165	5.55404	0.00121713	0.184806	3.AD/1.YC	GABA_neurons
chr17:41966335-41967130	ENSG00000173786_CNP,0	ENSG00000173786_CNP,0;ENSG00000204815_TTC25,35718	-1.06829	4.86851	0.0029738	0.239598	3.AD/1.YC	GABA_neurons
chr17:42388155-42389085	ENSG00000168610_STAT3,0	ENSG00000168610_STAT3,0	-0.962568	6.08817	0.00208997	0.22041	3.AD/1.YC	GABA_neurons
chr17:42676669-42677520	ENSG00000068137_PLEKHH3,0	ENSG00000068137_PLEKHH3,0	-0.993958	5.41128	0.00297632	0.239598	3.AD/1.YC	GABA_neurons
chr17:43169955-43170625	ENSG00000012048_BRCA1,0;ENSG00000188554_NBR1,0;ENSG00000267002_AC060780.1,412	ENSG00000012048_BRCA1,0;ENSG00000188554_NBR1,0;ENSG00000267002_AC060780.1,412	-1.26569	4.6995	0.000764787	0.167506	3.AD/1.YC	GABA_neurons
chr17:43784429-43785326	ENSG00000267604_AC003098.1,0	ENSG00000267604_AC003098.1,0;ENSG00000231256_CFAP97D1,3994	-4.13982	1.85015	0.00116677	0.183552	3.AD/1.YC	GABA_neurons
chr17:43920511-43921417	ENSG00000282199_AC007993.3,1584	ENSG00000282199_AC007993.3,1584	-6.97974	1.37778	0.00259953	0.230677	3.AD/1.YC	GABA_neurons
chr17:44186419-44187297	ENSG00000267080_ASB16-AS1,0;ENSG00000168591_TMUB2,0	ENSG00000267080_ASB16-AS1,0;ENSG00000168591_TMUB2,0	-1.09882	5.76093	0.000421493	0.139758	3.AD/1.YC	GABA_neurons
chr17:44366948-44367819			-2.93855	2.24753	0.0028567	0.236386	3.AD/1.YC	GABA_neurons
chr17:45161269-45162099	ENSG00000224505_AC138150.1,0;ENSG00000168517_HEXIM2,569	ENSG00000224505_AC138150.1,0;ENSG00000168517_HEXIM2,569	-0.964181	5.39433	0.00302474	0.240414	3.AD/1.YC	GABA_neurons
chr17:45893959-45894881	ENSG00000279685_MAPT-IT1,-902;ENSG00000186868_MAPT,0;ENSG00000264589_MAPT-AS1,799	ENSG00000186868_MAPT,0;ENSG00000264589_MAPT-AS1,799	-0.990527	5.60046	0.00178918	0.210859	3.AD/1.YC	GABA_neurons
chr17:47530606-47531472		ENSG00000141279_NPEPPS,7664	-1.32086	4.18738	0.00264715	0.231611	3.AD/1.YC	GABA_neurons
chr17:47895715-47896638	ENSG00000264920_AC018521.5,0;ENSG00000167182_SP2,0	ENSG00000264920_AC018521.5,0;ENSG00000167182_SP2,0	-1.31111	6.19321	1.88665e-05	0.0528242	3.AD/1.YC	GABA_neurons
chr17:48100960-48101835	ENSG00000002919_SNX11,-1522;ENSG00000108468_CBX1,0	ENSG00000108468_CBX1,0	-1.0363	5.21553	0.0018734	0.213801	3.AD/1.YC	GABA_neurons
chr17:49192418-49193125			-1.20739	5.40324	0.000230687	0.118322	3.AD/1.YC	GABA_neurons
chr17:50161152-50162037	ENSG00000253730_AC015909.2,0	ENSG00000253730_AC015909.2,0	-1.40033	4.65102	0.00025517	0.119486	3.AD/1.YC	GABA_neurons
chr17:50372616-50373522	ENSG00000108826_MRPL27,0;ENSG00000154920_EME1,0	ENSG00000108826_MRPL27,0;ENSG00000154920_EME1,0	-1.30949	4.28476	0.00215563	0.221293	3.AD/1.YC	GABA_neurons
chr17:51046400-51047318		ENSG00000249870_AC005920.2,3876;ENSG00000008294_SPAG9,73550	-1.22886	4.39725	0.00285507	0.236386	3.AD/1.YC	GABA_neurons
chr17:51120441-51121315	ENSG00000008294_SPAG9,0	ENSG00000008294_SPAG9,0	-0.921431	5.82503	0.00309677	0.241682	3.AD/1.YC	GABA_neurons
chr17:51153083-51153983	ENSG00000239672_NME1,0	ENSG00000239672_NME1,0	-1.26118	5.03931	0.000323067	0.12686	3.AD/1.YC	GABA_neurons
chr17:58517636-58518476	ENSG00000264672_SEPTIN4-AS1,-1361;ENSG00000108389_MTMR4,0	ENSG00000108389_MTMR4,0	-0.976429	6.00177	0.00136262	0.191491	3.AD/1.YC	GABA_neurons
chr17:63842512-63843400	ENSG00000108604_SMARCD2,0	ENSG00000108604_SMARCD2,0	-0.99883	5.91857	0.00111954	0.180961	3.AD/1.YC	GABA_neurons
chr17:63848707-63849638			-1.19576	4.5795	0.00191548	0.215628	3.AD/1.YC	GABA_neurons
chr17:64145490-64146357	ENSG00000266402_SNHG25,0	ENSG00000266402_SNHG25,0	-1.16193	5.49555	0.0003774	0.136331	3.AD/1.YC	GABA_neurons
chr17:64505029-64505756	ENSG00000258890_CEP95,-1109	ENSG00000108654_DDX5,2443	-1.43266	3.90019	0.0031074	0.242357	3.AD/1.YC	GABA_neurons
chr17:68291298-68292034	ENSG00000108932_SLC16A6,-31	ENSG00000141337_ARSG,32116	-1.16538	4.78288	0.00127316	0.186643	3.AD/1.YC	GABA_neurons
chr17:68511982-68512747	ENSG00000108946_PRKAR1A,202	ENSG00000108946_PRKAR1A,202;ENSG00000267009_AC007780.1,98359	-1.00178	5.24085	0.00328285	0.247069	3.AD/1.YC	GABA_neurons
chr17:70609336-70610199			-2.43746	2.75337	0.00102956	0.177642	3.AD/1.YC	GABA_neurons
chr17:71052710-71053597			-7.27023	1.63609	0.000951816	0.175719	3.AD/1.YC	GABA_neurons
chr17:74514115-74514954			-3.15343	2.70552	0.000205262	0.112561	3.AD/1.YC	GABA_neurons
chr17:74872725-74873618	ENSG00000161513_FDXR,0	ENSG00000161513_FDXR,0	-0.921076	6.15571	0.0023646	0.226757	3.AD/1.YC	GABA_neurons
chr17:75784388-75785291	ENSG00000132478_UNK,0;ENSG00000132475_H3F3B,602	ENSG00000132478_UNK,0;ENSG00000132475_H3F3B,602	-1.11791	5.46806	0.000574819	0.155891	3.AD/1.YC	GABA_neurons
chr17:76353491-76354405		ENSG00000161542_PRPSAP1,30116	-1.11969	5.22563	0.00104899	0.178169	3.AD/1.YC	GABA_neurons
chr17:76737177-76737955	ENSG00000161547_SRSF2,0;ENSG00000092931_MFSD11,1312	ENSG00000161547_SRSF2,0;ENSG00000092931_MFSD11,1312	-0.973505	5.7295	0.0022508	0.224138	3.AD/1.YC	GABA_neurons
chr17:77235094-77236033			-1.8849	3.68436	0.000478951	0.14755	3.AD/1.YC	GABA_neurons
chr17:78040617-78041466		ENSG00000078687_TNRC6C,81377	-1.63058	4.02332	0.000875092	0.174157	3.AD/1.YC	GABA_neurons
chr17:78840464-78841387	ENSG00000055483_USP36,54	ENSG00000055483_USP36,54	-0.904954	6.0031	0.0028235	0.236288	3.AD/1.YC	GABA_neurons
chr17:81285129-81286001		ENSG00000157637_SLC38A10,9546	2.34586	3.2852	0.000247163	0.118322	3.AD/1.YC	GABA_neurons
chr17:81991403-81992333		ENSG00000169696_ASPSCR1,14596	1.73912	3.80612	0.000801657	0.169968	3.AD/1.YC	GABA_neurons
chr17:82098163-82098936	ENSG00000169710_FASN,0	ENSG00000169710_FASN,0	-0.959539	5.9924	0.00153217	0.198941	3.AD/1.YC	GABA_neurons
chr18:2570889-2571748	ENSG00000101574_METTL4,0;ENSG00000080986_NDC80,0	ENSG00000101574_METTL4,0;ENSG00000080986_NDC80,0	-1.27759	4.55528	0.00144032	0.195338	3.AD/1.YC	GABA_neurons
chr18:9136328-9137087	ENSG00000266053_NDUFV2-AS1,0;ENSG00000101745_ANKRD12,100	ENSG00000266053_NDUFV2-AS1,0;ENSG00000101745_ANKRD12,100	-0.931936	5.59367	0.00336082	0.249135	3.AD/1.YC	GABA_neurons
chr18:9474903-9475827	ENSG00000273335_AP005432.2,-897;ENSG00000017797_RALBP1,0	ENSG00000017797_RALBP1,0	-1.09362	6.20057	0.000243073	0.118322	3.AD/1.YC	GABA_neurons
chr18:9913438-9914325	ENSG00000272799_AC006238.1,-589;ENSG00000101558_VAPA,0	ENSG00000101558_VAPA,0	-0.934697	5.79726	0.00317507	0.244066	3.AD/1.YC	GABA_neurons
chr18:14117307-14118223		ENSG00000175322_ZNF519,14267	-3.13532	2.74211	0.000208838	0.112868	3.AD/1.YC	GABA_neurons
chr18:22933067-22933880	ENSG00000265943_AC090912.1,0	ENSG00000265943_AC090912.1,0;ENSG00000101773_RBBP8,134806	-1.14761	4.80561	0.00199772	0.216892	3.AD/1.YC	GABA_neurons
chr18:26226082-26226906	ENSG00000141384_TAF4B,146	ENSG00000141384_TAF4B,146	-1.02174	5.00823	0.0030284	0.240414	3.AD/1.YC	GABA_neurons
chr18:29163817-29164724			-7.26072	1.64331	0.000977354	0.176149	3.AD/1.YC	GABA_neurons
chr18:31684920-31685746	ENSG00000259985_AC017100.1,0;ENSG00000118276_B4GALT6,90	ENSG00000259985_AC017100.1,0;ENSG00000118276_B4GALT6,90	-1.5249	4.83554	2.44952e-05	0.057058	3.AD/1.YC	GABA_neurons
chr18:34673934-34674716		ENSG00000134769_DTNA,180644	2.70393	2.45776	0.00182193	0.211915	3.AD/1.YC	GABA_neurons
chr18:35095524-35096470		ENSG00000166974_MAPRE2,118596	-2.91152	2.20505	0.00274938	0.234565	3.AD/1.YC	GABA_neurons
chr18:36296482-36297162	ENSG00000134775_FHOD3,-552		-1.49845	4.03974	0.000998075	0.176188	3.AD/1.YC	GABA_neurons
chr18:38122248-38123120			-3.47344	2.18199	0.00157199	0.200738	3.AD/1.YC	GABA_neurons
chr18:41954762-41955660	ENSG00000078142_PIK3C3,0	ENSG00000078142_PIK3C3,0	-1.38612	4.30556	0.000843979	0.170867	3.AD/1.YC	GABA_neurons
chr18:45715149-45716053		ENSG00000141469_SLC14A1,28124;ENSG00000267193_AC023421.2,31162	2.97459	2.34615	0.00110805	0.180237	3.AD/1.YC	GABA_neurons
chr18:52425782-52426621		ENSG00000187323_DCC,85585	-7.53409	1.69203	0.000307447	0.124897	3.AD/1.YC	GABA_neurons
chr18:57230496-57231218			-7.1184	1.53895	0.00160806	0.202342	3.AD/1.YC	GABA_neurons
chr18:57792858-57793730		ENSG00000081923_ATP8B1,9585	-3.33256	2.09536	0.00215211	0.221293	3.AD/1.YC	GABA_neurons
chr18:58361844-58362719		ENSG00000049759_NEDD4L,317618	-3.24719	2.78489	7.44411e-05	0.0808207	3.AD/1.YC	GABA_neurons
chr18:58864458-58865159	ENSG00000074657_ZNF532,1858	ENSG00000074657_ZNF532,1858	-1.52145	3.88833	0.00173209	0.208743	3.AD/1.YC	GABA_neurons
chr18:63422133-63423039	ENSG00000119541_VPS4B,0	ENSG00000119541_VPS4B,0	-1.07062	5.31766	0.00134128	0.190015	3.AD/1.YC	GABA_neurons
chr18:63970065-63970971	ENSG00000283667_AC009802.1,0;ENSG00000166401_SERPINB8,36	ENSG00000283667_AC009802.1,0;ENSG00000166401_SERPINB8,36;ENSG00000221887_HMSD,20764	-1.01737	5.28371	0.00236582	0.226757	3.AD/1.YC	GABA_neurons
chr18:68840652-68841455		ENSG00000150636_CCDC102B,125443	-8.06079	2.21092	1.98063e-05	0.0528242	3.AD/1.YC	GABA_neurons
chr18:79068758-79069689	ENSG00000166377_ATP9B,0	ENSG00000166377_ATP9B,0	-1.18736	6.02206	8.52362e-05	0.0836569	3.AD/1.YC	GABA_neurons
chr19:246724-247546	ENSG00000282508_LINC01002,-180		-3.65359	2.74424	1.3829e-05	0.0528242	3.AD/1.YC	GABA_neurons
chr19:368043-368956		ENSG00000105549_THEG,7070	-2.51561	2.77403	0.00189049	0.21481	3.AD/1.YC	GABA_neurons
chr19:488705-489563	ENSG00000099866_MADCAM1,0	ENSG00000099866_MADCAM1,0	-1.10174	5.06223	0.00120711	0.184806	3.AD/1.YC	GABA_neurons
chr19:506716-507562	ENSG00000141933_TPGS1,0;ENSG00000266933_AC005775.1,271	ENSG00000141933_TPGS1,0;ENSG00000266933_AC005775.1,271	-1.06185	5.84404	0.000626966	0.16154	3.AD/1.YC	GABA_neurons
chr19:572104-572972	ENSG00000267751_AC009005.1,0;ENSG00000172270_BSG,827	ENSG00000267751_AC009005.1,0;ENSG00000172270_BSG,827	-0.966749	5.36481	0.00301525	0.240414	3.AD/1.YC	GABA_neurons
chr19:796842-797700	ENSG00000011304_PTBP1,0	ENSG00000011304_PTBP1,0	-0.960704	5.90358	0.00213021	0.221293	3.AD/1.YC	GABA_neurons
chr19:1592396-1593181	ENSG00000071655_MBD3,0	ENSG00000071655_MBD3,0	-1.07688	5.39989	0.000884459	0.174613	3.AD/1.YC	GABA_neurons
chr19:2151261-2152159		ENSG00000065000_AP3D1,12309	-1.09672	5.62553	0.000636032	0.161884	3.AD/1.YC	GABA_neurons
chr19:2427293-2428212	ENSG00000099800_TIMM13,0	ENSG00000099800_TIMM13,0;ENSG00000176619_LMNB2,28747	-0.986703	5.32152	0.00329129	0.247268	3.AD/1.YC	GABA_neurons
chr19:2475673-2476522	ENSG00000099860_GADD45B,0	ENSG00000099860_GADD45B,0	-1.05214	5.25569	0.00254173	0.229325	3.AD/1.YC	GABA_neurons
chr19:2782985-2783880	ENSG00000172009_THOP1,-1623;ENSG00000104969_SGTA,0	ENSG00000104969_SGTA,0	-1.32588	4.96174	0.000138497	0.0993997	3.AD/1.YC	GABA_neurons
chr19:3505700-3506616	ENSG00000105325_FZR1,0	ENSG00000105325_FZR1,0	-0.9761	5.83265	0.00177401	0.21012	3.AD/1.YC	GABA_neurons
chr19:4007091-4008021	ENSG00000105229_PIAS4,0	ENSG00000105229_PIAS4,0	-1.00648	5.49345	0.00286942	0.236386	3.AD/1.YC	GABA_neurons
chr19:4183882-4184714	ENSG00000077463_SIRT6,-1316;ENSG00000089847_ANKRD24,528	ENSG00000089847_ANKRD24,528	-2.55747	2.82369	0.00123486	0.185136	3.AD/1.YC	GABA_neurons
chr19:4246781-4247655	ENSG00000105248_YJU2,0	ENSG00000105248_YJU2,0	-1.07007	5.30784	0.00125657	0.186119	3.AD/1.YC	GABA_neurons
chr19:4723490-4724362	ENSG00000142002_DPP9,311	ENSG00000142002_DPP9,311	-0.999164	5.66002	0.00164618	0.204378	3.AD/1.YC	GABA_neurons
chr19:4791079-4792009	ENSG00000268536_AC005523.1,0;ENSG00000141965_FEM1A,0	ENSG00000268536_AC005523.1,0;ENSG00000141965_FEM1A,0;ENSG00000269604_AC005523.2,3550	-0.88127	6.32885	0.0025658	0.229411	3.AD/1.YC	GABA_neurons
chr19:5340441-5341226	ENSG00000105426_PTPRS,0	ENSG00000105426_PTPRS,0	-1.06	5.22947	0.00212014	0.221293	3.AD/1.YC	GABA_neurons
chr19:5622493-5623398	ENSG00000160633_SAFB,0;ENSG00000130254_SAFB2,648	ENSG00000160633_SAFB,0;ENSG00000130254_SAFB2,648	-1.05137	4.9439	0.00291979	0.23813	3.AD/1.YC	GABA_neurons
chr19:5719935-5720819	ENSG00000196365_LONP1,0;ENSG00000174898_CATSPERD,0	ENSG00000196365_LONP1,0;ENSG00000174898_CATSPERD,0	-1.01071	5.52843	0.00148868	0.197543	3.AD/1.YC	GABA_neurons
chr19:5790494-5791291	ENSG00000141994_DUS3L,0	ENSG00000141994_DUS3L,0	-1.29476	5.04691	0.000181815	0.108655	3.AD/1.YC	GABA_neurons
chr19:6424705-6425614	ENSG00000088247_KHSRP,0	ENSG00000088247_KHSRP,0	-0.926023	6.26927	0.00198737	0.216672	3.AD/1.YC	GABA_neurons
chr19:7500694-7501592		ENSG00000198723_TEX45,7718	-1.09737	4.89189	0.00241662	0.22814	3.AD/1.YC	GABA_neurons
chr19:7522075-7522981	ENSG00000269371_AC008878.4,-1615;ENSG00000090674_MCOLN1,0	ENSG00000090674_MCOLN1,0	-1.12198	4.82741	0.00267763	0.231765	3.AD/1.YC	GABA_neurons
chr19:7903304-7904180	ENSG00000214248_AC010336.1,0;ENSG00000076984_MAP2K7,0	ENSG00000214248_AC010336.1,0;ENSG00000076984_MAP2K7,0	-1.07588	5.23189	0.00179308	0.210878	3.AD/1.YC	GABA_neurons
chr19:8832207-8833088	ENSG00000167785_ZNF558,0;ENSG00000170948_MBD3L1,0;ENSG00000269400_AC008734.2,0	ENSG00000167785_ZNF558,0;ENSG00000170948_MBD3L1,0;ENSG00000269400_AC008734.2,0	-1.09534	5.91014	0.000403338	0.139401	3.AD/1.YC	GABA_neurons
chr19:10095818-10096714		ENSG00000130812_ANGPTL6,6082	-0.948758	5.4255	0.00336931	0.249228	3.AD/1.YC	GABA_neurons
chr19:10105885-10106783	ENSG00000130810_PPAN,0	ENSG00000130810_PPAN,0	-1.33882	5.03009	0.000122442	0.096729	3.AD/1.YC	GABA_neurons
chr19:10194479-10195347		ENSG00000130816_DNMT1,35939	-1.12835	5.29742	0.000775281	0.168643	3.AD/1.YC	GABA_neurons
chr19:10653708-10654608	ENSG00000267100_ILF3-DT,0;ENSG00000129351_ILF3,0	ENSG00000267100_ILF3-DT,0;ENSG00000129351_ILF3,0	-1.07256	5.68571	0.00150128	0.197893	3.AD/1.YC	GABA_neurons
chr19:10717394-10718287	ENSG00000079805_DNM2,0	ENSG00000079805_DNM2,0	-1.01898	5.97507	0.00081184	0.169968	3.AD/1.YC	GABA_neurons
chr19:10835560-10836430	ENSG00000214212_C19orf38,-145;ENSG00000099203_TMED1,0	ENSG00000099203_TMED1,0	-1.04593	5.76803	0.00174574	0.20971	3.AD/1.YC	GABA_neurons
chr19:11115731-11116572		ENSG00000130164_LDLR,26369	1.96736	2.97567	0.00322918	0.245317	3.AD/1.YC	GABA_neurons
chr19:11374479-11375398	ENSG00000173928_SWSAP1,0;ENSG00000267277_AC024575.1,0	ENSG00000267277_AC024575.1,0;ENSG00000173928_SWSAP1,0	-1.01946	6.02272	0.000805968	0.169968	3.AD/1.YC	GABA_neurons
chr19:12782182-12783120	ENSG00000267212_AC018761.3,1981	ENSG00000095066_HOOK2,89620	-1.34044	5.17435	8.8179e-05	0.0838787	3.AD/1.YC	GABA_neurons
chr19:13151380-13152266	ENSG00000104915_STX10,-997;ENSG00000287296_AC011446.3,647;ENSG00000160888_IER2,969;ENSG00000267598_AC011446.2,1927	ENSG00000287296_AC011446.3,647;ENSG00000160888_IER2,969	-0.946058	5.60689	0.00270514	0.232554	3.AD/1.YC	GABA_neurons
chr19:13774060-13774932	ENSG00000267633_AC008686.1,0;ENSG00000104979_C19orf53,0	ENSG00000267633_AC008686.1,0;ENSG00000104979_C19orf53,0;ENSG00000037757_MRI1,9538	-1.27556	4.51423	0.0023908	0.227491	3.AD/1.YC	GABA_neurons
chr19:14206607-14207416	ENSG00000072071_ADGRL1,-420		-1.18193	5.15777	0.00049268	0.148147	3.AD/1.YC	GABA_neurons
chr19:14418953-14419841	ENSG00000123136_DDX39A,0	ENSG00000123136_DDX39A,0	-1.00093	5.26366	0.00278513	0.236137	3.AD/1.YC	GABA_neurons
chr19:14518154-14518885	ENSG00000099797_TECR,1069	ENSG00000099797_TECR,1069;ENSG00000132002_DNAJB1,10885	-1.02662	5.71708	0.00120648	0.184806	3.AD/1.YC	GABA_neurons
chr19:16076015-16076866		ENSG00000167460_TPM4,8994	-1.18961	4.73237	0.00117823	0.183552	3.AD/1.YC	GABA_neurons
chr19:16111192-16112119	ENSG00000167461_RAB8A,0	ENSG00000167461_RAB8A,0	-1.12202	6.04147	0.00019903	0.112472	3.AD/1.YC	GABA_neurons
chr19:16197437-16198322	ENSG00000072958_AP1M1,0;ENSG00000287961_AC020911.3,0	ENSG00000287961_AC020911.3,0;ENSG00000072958_AP1M1,0	-1.41027	4.7031	0.00017927	0.108655	3.AD/1.YC	GABA_neurons
chr19:17859344-17860256	ENSG00000105640_RPL18A,0	ENSG00000105640_RPL18A,0	-1.2462	5.40879	0.000119037	0.0959265	3.AD/1.YC	GABA_neurons
chr19:17932408-17933301	ENSG00000007080_CCDC124,0	ENSG00000007080_CCDC124,0	-1.17735	4.59343	0.00213906	0.221293	3.AD/1.YC	GABA_neurons
chr19:18152619-18153439	ENSG00000269145_AC007192.2,-928;ENSG00000105647_PIK3R2,0	ENSG00000105647_PIK3R2,0	-1.22317	5.52693	0.00017197	0.108035	3.AD/1.YC	GABA_neurons
chr19:18281309-18282200	ENSG00000130522_JUND,0	ENSG00000130522_JUND,0	-0.928159	6.16309	0.00335554	0.248894	3.AD/1.YC	GABA_neurons
chr19:18919086-18919991	ENSG00000105669_COPE,0;ENSG00000105671_DDX49,0	ENSG00000105669_COPE,0;ENSG00000105671_DDX49,0	-0.994034	5.67484	0.00153042	0.198941	3.AD/1.YC	GABA_neurons
chr19:19663397-19664324	ENSG00000105726_ATP13A1,0	ENSG00000105726_ATP13A1,0	-1.04313	5.93658	0.000752804	0.167506	3.AD/1.YC	GABA_neurons
chr19:20775837-20776697	ENSG00000160229_ZNF66,0	ENSG00000160229_ZNF66,0	-1.07154	5.02324	0.00224401	0.224007	3.AD/1.YC	GABA_neurons
chr19:20999443-21000332			-1.16521	4.59847	0.00223531	0.223748	3.AD/1.YC	GABA_neurons
chr19:21358573-21359439	ENSG00000172687_ZNF738,0	ENSG00000172687_ZNF738,0	-1.5344	4.3939	0.000188962	0.110393	3.AD/1.YC	GABA_neurons
chr19:21505267-21506080		ENSG00000197013_ZNF429,8585	-1.19738	4.81227	0.00108316	0.180063	3.AD/1.YC	GABA_neurons
chr19:29212729-29213589	ENSG00000169021_UQCRFS1,0;ENSG00000267498_AC007786.1,0	ENSG00000169021_UQCRFS1,0;ENSG00000267498_AC007786.1,0	-1.2462	4.57796	0.00119051	0.18395	3.AD/1.YC	GABA_neurons
chr19:33052092-33053001		ENSG00000131941_RHPN2,11887	3.05133	2.53021	0.0012319	0.185136	3.AD/1.YC	GABA_neurons
chr19:35647825-35648709	ENSG00000126267_COX6B1,0	ENSG00000126267_COX6B1,0	-1.08062	4.89979	0.00241036	0.228038	3.AD/1.YC	GABA_neurons
chr19:35744926-35745706	ENSG00000161265_U2AF1L4,0;ENSG00000205155_PSENEN,0	ENSG00000161265_U2AF1L4,0;ENSG00000205155_PSENEN,0	-1.05278	5.63426	0.000844081	0.170867	3.AD/1.YC	GABA_neurons
chr19:35931181-35932111			-0.957093	5.49351	0.00270971	0.232554	3.AD/1.YC	GABA_neurons
chr19:36114920-36115801	ENSG00000105258_POLR2I,0;ENSG00000105254_TBCB,631	ENSG00000105258_POLR2I,0;ENSG00000105254_TBCB,631	-1.01949	5.55815	0.00140948	0.194292	3.AD/1.YC	GABA_neurons
chr19:36139499-36140383	ENSG00000126247_CAPNS1,0	ENSG00000126247_CAPNS1,0	-1.1549	5.26101	0.000557121	0.15553	3.AD/1.YC	GABA_neurons
chr19:37468824-37469739	ENSG00000196437_ZNF569,0;ENSG00000171827_ZNF570,1239	ENSG00000196437_ZNF569,0;ENSG00000171827_ZNF570,1239	-1.08163	5.12083	0.00320379	0.244783	3.AD/1.YC	GABA_neurons
chr19:38209306-38210141			-1.4008	4.13093	0.00209574	0.22041	3.AD/1.YC	GABA_neurons
chr19:38315599-38316497	ENSG00000167645_YIF1B,776	ENSG00000167645_YIF1B,776	-1.16103	5.0826	0.000866141	0.17322	3.AD/1.YC	GABA_neurons
chr19:38647118-38648008	ENSG00000130402_ACTN4,0	ENSG00000130402_ACTN4,0	-1.15408	5.42024	0.000787902	0.169584	3.AD/1.YC	GABA_neurons
chr19:38849820-38850719	ENSG00000104824_HNRNPL,1628	ENSG00000104824_HNRNPL,1628	-0.949433	6.49504	0.00111457	0.180516	3.AD/1.YC	GABA_neurons
chr19:39341777-39342705	ENSG00000269246_AC011445.2,0;ENSG00000130755_GMFG,0;ENSG00000179134_SAMD4B,0	ENSG00000130755_GMFG,0;ENSG00000269246_AC011445.2,0;ENSG00000179134_SAMD4B,0	-0.926192	6.12599	0.00240997	0.228038	3.AD/1.YC	GABA_neurons
chr19:39951580-39952493			-7.29418	1.6678	0.000666617	0.162591	3.AD/1.YC	GABA_neurons
chr19:40155556-40156492			-3.81343	2.47556	0.000200264	0.112472	3.AD/1.YC	GABA_neurons
chr19:40285007-40285803	ENSG00000105221_AKT2,0	ENSG00000105221_AKT2,0	-0.989658	5.2837	0.00303428	0.240414	3.AD/1.YC	GABA_neurons
chr19:40750367-40751221	ENSG00000077312_SNRPA,0;ENSG00000188493_C19orf54,332	ENSG00000077312_SNRPA,0;ENSG00000188493_C19orf54,332	-1.12824	5.90647	0.000230441	0.118322	3.AD/1.YC	GABA_neurons
chr19:42242479-42243417	ENSG00000105723_GSK3A,0	ENSG00000105723_GSK3A,0	-0.926944	6.00697	0.00277353	0.23611	3.AD/1.YC	GABA_neurons
chr19:42268466-42269218	ENSG00000079432_CIC,0	ENSG00000079432_CIC,0	-0.97086	6.38988	0.00084148	0.170867	3.AD/1.YC	GABA_neurons
chr19:42280135-42280992		ENSG00000079432_CIC,11598	-1.01804	5.12975	0.00278088	0.23611	3.AD/1.YC	GABA_neurons
chr19:42325096-42325974	ENSG00000105429_MEGF8,0	ENSG00000105429_MEGF8,0	-1.01253	5.68008	0.00131643	0.188851	3.AD/1.YC	GABA_neurons
chr19:43595845-43596738	ENSG00000167378_IRGQ,0;ENSG00000124444_ZNF576,0;ENSG00000226763_SRRM5,0	ENSG00000167378_IRGQ,0;ENSG00000124444_ZNF576,0;ENSG00000226763_SRRM5,0	-1.05526	5.25507	0.001891	0.21481	3.AD/1.YC	GABA_neurons
chr19:44112875-44113754	ENSG00000186019_AC021092.1,0;ENSG00000256294_ZNF225,694	ENSG00000186019_AC021092.1,0;ENSG00000256294_ZNF225,694	-1.06789	5.24918	0.0015795	0.200738	3.AD/1.YC	GABA_neurons
chr19:45001666-45002305	ENSG00000104856_RELB,217	ENSG00000104856_RELB,217	-1.17051	4.90077	0.000946765	0.175719	3.AD/1.YC	GABA_neurons
chr19:45178035-45178923	ENSG00000007255_TRAPPC6A,0;ENSG00000189114_BLOC1S3,0	ENSG00000007255_TRAPPC6A,0;ENSG00000189114_BLOC1S3,0;ENSG00000007047_MARK4,98747	-1.14585	5.95967	0.000301986	0.123909	3.AD/1.YC	GABA_neurons
chr19:45427340-45428239		ENSG00000012061_ERCC1,50589	-2.1416	2.93081	0.00197826	0.21631	3.AD/1.YC	GABA_neurons
chr19:46078508-46079070	ENSG00000204869_IGFL4,-1390		-3.20151	2.42517	0.000765889	0.167506	3.AD/1.YC	GABA_neurons
chr19:46540056-46540919		ENSG00000230510_PPP5D1,60281	-2.87182	2.50508	0.000927395	0.175719	3.AD/1.YC	GABA_neurons
chr19:46745970-46746797	ENSG00000181027_FKRP,0;ENSG00000090372_STRN4,197	ENSG00000181027_FKRP,0;ENSG00000090372_STRN4,197	-1.14239	4.59254	0.00256812	0.229411	3.AD/1.YC	GABA_neurons
chr19:47112859-47113684	ENSG00000142230_SAE1,0;ENSG00000130749_ZC3H4,92	ENSG00000142230_SAE1,0;ENSG00000130749_ZC3H4,92	-1.16298	5.37122	0.00041706	0.139758	3.AD/1.YC	GABA_neurons
chr19:47514818-47515754	ENSG00000105402_NAPA,0	ENSG00000105402_NAPA,0	-1.11303	5.63581	0.000497883	0.14834	3.AD/1.YC	GABA_neurons
chr19:48110219-48111109	ENSG00000105499_PLA2G4C,0	ENSG00000105499_PLA2G4C,0	-1.27771	4.71246	0.000488678	0.147667	3.AD/1.YC	GABA_neurons
chr19:48321558-48322347	ENSG00000105479_CCDC114,0;ENSG00000142227_EMP3,49	ENSG00000105479_CCDC114,0;ENSG00000142227_EMP3,49	-1.30094	4.83643	0.000316593	0.126518	3.AD/1.YC	GABA_neurons
chr19:48795053-48795976		ENSG00000105552_BCAT2,15053	-1.00613	5.33253	0.00225049	0.224138	3.AD/1.YC	GABA_neurons
chr19:49118683-49119549	ENSG00000221916_C19orf73,0;ENSG00000177380_PPFIA3,0	ENSG00000221916_C19orf73,0;ENSG00000177380_PPFIA3,0	-1.16137	5.72658	0.000229773	0.118322	3.AD/1.YC	GABA_neurons
chr19:49441048-49441868	ENSG00000104888_SLC17A7,492	ENSG00000104888_SLC17A7,492	-2.83071	2.50326	0.0012386	0.185136	3.AD/1.YC	GABA_neurons
chr19:49451420-49452259	ENSG00000161618_ALDH16A1,-966;ENSG00000104872_PIH1D1,1238	ENSG00000104872_PIH1D1,1238	-1.37747	4.87137	0.000111288	0.0916328	3.AD/1.YC	GABA_neurons
chr19:49452934-49453869	ENSG00000161618_ALDH16A1,0;ENSG00000104872_PIH1D1,0	ENSG00000104872_PIH1D1,0;ENSG00000161618_ALDH16A1,0	-1.14934	5.52449	0.000429989	0.141428	3.AD/1.YC	GABA_neurons
chr19:49495766-49496683	ENSG00000142534_RPS11,0	ENSG00000142534_RPS11,0	-1.37355	5.7107	1.54495e-05	0.0528242	3.AD/1.YC	GABA_neurons
chr19:49690734-49691575	ENSG00000268677_AC011495.3,-161;ENSG00000169169_CPT1C,0	ENSG00000169169_CPT1C,0	-1.05295	4.95353	0.00283739	0.236386	3.AD/1.YC	GABA_neurons
chr19:49850468-49851345	ENSG00000104960_PTOV1,0;ENSG00000268006_PTOV1-AS1,331	ENSG00000104960_PTOV1,0;ENSG00000268006_PTOV1-AS1,331	-0.940975	5.66515	0.00297508	0.239598	3.AD/1.YC	GABA_neurons
chr19:49877282-49878157	ENSG00000104946_TBC1D17,0;ENSG00000039650_PNKP,194;ENSG00000204673_AKT1S1,302	ENSG00000104946_TBC1D17,0;ENSG00000039650_PNKP,194;ENSG00000204673_AKT1S1,302	-0.988763	6.06696	0.00150156	0.197893	3.AD/1.YC	GABA_neurons
chr19:50050340-50051212	ENSG00000204666_AC010624.1,0;ENSG00000269091_AC010624.3,0	ENSG00000269091_AC010624.3,0;ENSG00000204666_AC010624.1,0;ENSG00000142528_ZNF473,24626	-1.11874	4.95735	0.00129935	0.188204	3.AD/1.YC	GABA_neurons
chr19:51926761-51927650	ENSG00000176024_ZNF613,0	ENSG00000176024_ZNF613,0	-1.34508	4.65969	0.000338629	0.12862	3.AD/1.YC	GABA_neurons
chr19:52189541-52190394	ENSG00000105568_PPP2R1A,0	ENSG00000105568_PPP2R1A,0	-0.938769	6.26074	0.00171747	0.207502	3.AD/1.YC	GABA_neurons
chr19:53520418-53521347	ENSG00000130844_ZNF331,891	ENSG00000130844_ZNF331,891	-1.03503	4.9298	0.00304329	0.240414	3.AD/1.YC	GABA_neurons
chr19:54159410-54160314	ENSG00000105617_LENG1,0	ENSG00000105617_LENG1,0;ENSG00000167608_TMC4,12936	-1.01083	5.6829	0.00144024	0.195338	3.AD/1.YC	GABA_neurons
chr19:54200378-54201297	ENSG00000223660_AC245052.1,-407;ENSG00000170889_RPS9,0	ENSG00000170889_RPS9,0	-1.24571	5.35973	0.000194452	0.111733	3.AD/1.YC	GABA_neurons
chr19:54448768-54449692	ENSG00000167615_LENG8,0;ENSG00000226696_LENG8-AS1,0	ENSG00000226696_LENG8-AS1,0;ENSG00000167615_LENG8,0	-1.10748	5.21443	0.00144226	0.195338	3.AD/1.YC	GABA_neurons
chr19:55166268-55167103	ENSG00000167646_DNAAF3,0	ENSG00000167646_DNAAF3,0;ENSG00000267577_AC010327.4,7329	-1.72077	4.10241	0.000135061	0.0993997	3.AD/1.YC	GABA_neurons
chr19:55189170-55190027		ENSG00000080031_PTPRH,19479	-2.11059	3.09342	0.00205787	0.219985	3.AD/1.YC	GABA_neurons
chr19:55258733-55259624	ENSG00000105063_PPP6R1,0	ENSG00000105063_PPP6R1,0	-1.28517	5.21418	0.000124359	0.096729	3.AD/1.YC	GABA_neurons
chr19:55269003-55269911		ENSG00000133265_HSPBP1,10470	-1.92948	3.16382	0.00286292	0.236386	3.AD/1.YC	GABA_neurons
chr19:55339092-55340012	ENSG00000276831_AC020922.4,0;ENSG00000133247_KMT5C,0	ENSG00000276831_AC020922.4,0;ENSG00000133247_KMT5C,0	-1.06922	6.42964	0.000237586	0.118322	3.AD/1.YC	GABA_neurons
chr19:55385308-55386186	ENSG00000233493_TMEM238,-1016;ENSG00000108107_RPL28,0	ENSG00000108107_RPL28,0	-0.966194	5.4997	0.00335035	0.248659	3.AD/1.YC	GABA_neurons
chr19:55407552-55408489	ENSG00000108106_UBE2S,0	ENSG00000108106_UBE2S,0	-0.985818	6.15096	0.0016271	0.203485	3.AD/1.YC	GABA_neurons
chr19:55674722-55675636	ENSG00000267523_AC008735.2,-7;ENSG00000063245_EPN1,0	ENSG00000063245_EPN1,0	-1.52801	4.55411	0.000134621	0.0993997	3.AD/1.YC	GABA_neurons
chr19:56121024-56121883	ENSG00000142409_ZNF787,0	ENSG00000142409_ZNF787,0	-1.0944	5.62744	0.00222676	0.223748	3.AD/1.YC	GABA_neurons
chr19:56314597-56315367	ENSG00000267549_AC006116.8,0	ENSG00000267549_AC006116.8,0;ENSG00000131848_ZSCAN5A,53016	-0.983691	5.51186	0.00196592	0.216117	3.AD/1.YC	GABA_neurons
chr19:56393044-56393981	ENSG00000018869_ZNF582,0;ENSG00000267454_ZNF582-AS1,0	ENSG00000018869_ZNF582,0;ENSG00000267454_ZNF582-AS1,0	-1.46654	4.8647	4.1364e-05	0.0608391	3.AD/1.YC	GABA_neurons
chr19:56837388-56838299		ENSG00000198300_PEG3,2429;ENSG00000269699_ZIM2,2430	-1.18553	4.51975	0.00264897	0.231611	3.AD/1.YC	GABA_neurons
chr19:57362969-57363863	ENSG00000152433_ZNF547,0;ENSG00000256060_TRAPPC2B,0	ENSG00000152433_ZNF547,0;ENSG00000256060_TRAPPC2B,0	-1.18889	5.18764	0.000420305	0.139758	3.AD/1.YC	GABA_neurons
chr19:57389401-57390292	ENSG00000188785_ZNF548,0	ENSG00000188785_ZNF548,0	-1.08505	5.03189	0.00155872	0.200241	3.AD/1.YC	GABA_neurons
chr19:58380585-58381474	ENSG00000152475_ZNF837,0	ENSG00000152475_ZNF837,0	-1.017	6.08312	0.00144992	0.195338	3.AD/1.YC	GABA_neurons
chr19:58386685-58387503	ENSG00000083845_RPS5,285	ENSG00000083845_RPS5,285	-1.01887	5.19303	0.00319602	0.244783	3.AD/1.YC	GABA_neurons
chr19:58408127-58409014	ENSG00000232098_AC012313.1,0	ENSG00000232098_AC012313.1,0;ENSG00000171574_ZNF584,6623	-1.01844	5.34397	0.00242951	0.22814	3.AD/1.YC	GABA_neurons
chr19:58554647-58555572	ENSG00000130724_CHMP2A,0	ENSG00000130724_CHMP2A,0	-1.65979	4.68108	1.30137e-05	0.0528242	3.AD/1.YC	GABA_neurons
chr2:1545745-1546654		ENSG00000231482_AC105450.1,34093	-2.50383	2.71163	0.00112934	0.181452	3.AD/1.YC	GABA_neurons
chr2:2331784-2332434	ENSG00000186487_MYT1L,-120		-2.33839	2.92627	0.000869985	0.17355	3.AD/1.YC	GABA_neurons
chr2:5235915-5236730			-7.51745	1.85358	0.000279872	0.121328	3.AD/1.YC	GABA_neurons
chr2:5691793-5692647	ENSG00000230090_AC108025.1,-675;ENSG00000224128_LINC01248,-305;ENSG00000176887_SOX11,0	ENSG00000176887_SOX11,0	-1.42007	3.95941	0.00230228	0.224427	3.AD/1.YC	GABA_neurons
chr2:7666367-7667190			-7.20536	1.48445	0.00114933	0.182649	3.AD/1.YC	GABA_neurons
chr2:8681542-8682429	ENSG00000235092_ID2-AS1,0	ENSG00000235092_ID2-AS1,0;ENSG00000115738_ID2,2697	-1.07715	5.2171	0.00157607	0.200738	3.AD/1.YC	GABA_neurons
chr2:10812393-10813281		ENSG00000143870_PDIA6,24696	-0.986743	5.54114	0.00209815	0.22041	3.AD/1.YC	GABA_neurons
chr2:11009640-11010517			-3.23459	2.44634	0.000497381	0.14834	3.AD/1.YC	GABA_neurons
chr2:11386013-11386905			-3.10849	2.37768	0.00118022	0.183552	3.AD/1.YC	GABA_neurons
chr2:14516665-14517513			-7.08776	1.54976	0.00176459	0.21012	3.AD/1.YC	GABA_neurons
chr2:14789822-14790714		ENSG00000287291_AC068286.2,201352	-7.31474	1.70989	0.000707276	0.167177	3.AD/1.YC	GABA_neurons
chr2:15517495-15518405		ENSG00000151779_NBAS,42929	-8.08982	2.19564	1.6599e-05	0.0528242	3.AD/1.YC	GABA_neurons
chr2:16608636-16609510		ENSG00000197872_FAM49A,56821	-1.54889	3.80561	0.00171418	0.207502	3.AD/1.YC	GABA_neurons
chr2:17272370-17273291			-3.18469	2.42154	0.00106705	0.179084	3.AD/1.YC	GABA_neurons
chr2:17299974-17300814			-4.05353	1.87051	0.00135314	0.190815	3.AD/1.YC	GABA_neurons
chr2:24076105-24077006	ENSG00000115128_SF3B6,0;ENSG00000219626_FAM228B,0	ENSG00000115128_SF3B6,0;ENSG00000219626_FAM228B,0	-0.926484	5.87131	0.00264899	0.231611	3.AD/1.YC	GABA_neurons
chr2:24792781-24793731	ENSG00000138092_CENPO,0;ENSG00000184924_PTRHD1,0	ENSG00000184924_PTRHD1,0;ENSG00000138092_CENPO,0	-1.01803	5.14203	0.00246713	0.228725	3.AD/1.YC	GABA_neurons
chr2:26345567-26346460	ENSG00000173567_ADGRF3,357	ENSG00000173567_ADGRF3,357;ENSG00000138018_SELENOI,37020	-1.08401	5.86098	0.00085755	0.172755	3.AD/1.YC	GABA_neurons
chr2:26414236-26415022		ENSG00000157856_DRC1,12316	-2.23932	3.09999	0.000459838	0.145025	3.AD/1.YC	GABA_neurons
chr2:28392234-28393076	ENSG00000075426_FOSL2,0;ENSG00000229951_AC104695.2,1596	ENSG00000075426_FOSL2,0;ENSG00000229951_AC104695.2,1596	-1.08359	5.37044	0.0010605	0.178718	3.AD/1.YC	GABA_neurons
chr2:28751360-28752225	ENSG00000213639_PPP1CB,0;ENSG00000226833_AC092164.1,0	ENSG00000226833_AC092164.1,0;ENSG00000213639_PPP1CB,0	-0.98312	5.49692	0.00301142	0.240414	3.AD/1.YC	GABA_neurons
chr2:40511985-40512723		ENSG00000183023_SLC8A1,98330	-3.00381	2.25485	0.00142426	0.195233	3.AD/1.YC	GABA_neurons
chr2:41840590-41841443			-1.1988	5.17344	0.000458637	0.145019	3.AD/1.YC	GABA_neurons
chr2:43595633-43596560	ENSG00000115970_THADA,0	ENSG00000115970_THADA,0	-1.45807	5.13478	2.54255e-05	0.057058	3.AD/1.YC	GABA_neurons
chr2:44361342-44362203	ENSG00000138078_PREPL,0;ENSG00000143919_CAMKMT,0	ENSG00000138078_PREPL,0;ENSG00000143919_CAMKMT,0	-1.27235	4.87258	0.000393002	0.137757	3.AD/1.YC	GABA_neurons
chr2:45928635-45929506		ENSG00000171132_PRKCE,277290	-1.67707	3.47962	0.00318682	0.24451	3.AD/1.YC	GABA_neurons
chr2:48451773-48452408		ENSG00000162869_PPP1R21,11175	-7.01086	1.35955	0.00264655	0.231611	3.AD/1.YC	GABA_neurons
chr2:48482588-48483329		ENSG00000162869_PPP1R21,41990	-7.09313	1.38489	0.00187855	0.21419	3.AD/1.YC	GABA_neurons
chr2:55419506-55420407	ENSG00000115355_CCDC88A,0	ENSG00000115355_CCDC88A,0	-1.33684	5.42238	5.1598e-05	0.0659401	3.AD/1.YC	GABA_neurons
chr2:55617292-55618152	ENSG00000272606_AC015982.2,0;ENSG00000275052_PPP4R3B,728	ENSG00000272606_AC015982.2,0;ENSG00000275052_PPP4R3B,728	-1.06867	5.31548	0.0014003	0.19367	3.AD/1.YC	GABA_neurons
chr2:60581468-60582334			-1.53589	3.94633	0.00100135	0.176255	3.AD/1.YC	GABA_neurons
chr2:61763900-61764782			-1.17117	5.4169	0.000455641	0.144444	3.AD/1.YC	GABA_neurons
chr2:61853751-61854370	ENSG00000170264_FAM161A,0	ENSG00000170264_FAM161A,0	-1.15585	4.81932	0.00121841	0.184806	3.AD/1.YC	GABA_neurons
chr2:63588332-63589187	ENSG00000014641_MDH1,0	ENSG00000014641_MDH1,0;ENSG00000143951_WDPCP,238656	-1.2237	5.8641	8.38686e-05	0.0835915	3.AD/1.YC	GABA_neurons
chr2:65129855-65130786	ENSG00000138069_RAB1A,0	ENSG00000138069_RAB1A,0	-0.949647	5.9945	0.00206372	0.220161	3.AD/1.YC	GABA_neurons
chr2:68252261-68253166	ENSG00000273064_AC017083.1,0	ENSG00000273064_AC017083.1,0;ENSG00000221823_PPP3R1,3071	-1.26416	5.44818	9.81759e-05	0.0891526	3.AD/1.YC	GABA_neurons
chr2:70293270-70294212	ENSG00000143977_SNRPG,0	ENSG00000143977_SNRPG,0	-1.17331	5.049	0.000664964	0.162591	3.AD/1.YC	GABA_neurons
chr2:71068008-71068921	ENSG00000272735_AC007881.3,0	ENSG00000272735_AC007881.3,0;ENSG00000124357_NAGK,3664	-0.981704	5.41678	0.00256552	0.229411	3.AD/1.YC	GABA_neurons
chr2:73232897-73233755	ENSG00000135617_PRADC1,0;ENSG00000135624_CCT7,0	ENSG00000135617_PRADC1,0;ENSG00000135624_CCT7,0	-0.952693	5.72722	0.00217501	0.221293	3.AD/1.YC	GABA_neurons
chr2:73926462-73927365	ENSG00000114956_DGUOK,0	ENSG00000114956_DGUOK,0	-1.38888	4.42315	0.000976367	0.176149	3.AD/1.YC	GABA_neurons
chr2:74119905-74120810			-1.25405	4.42989	0.00215443	0.221293	3.AD/1.YC	GABA_neurons
chr2:74472180-74473047	ENSG00000204822_MRPL53,0	ENSG00000204822_MRPL53,0;ENSG00000286883_AC005041.5,6841;ENSG00000135637_CCDC142,10361	-1.22936	4.9443	0.000418922	0.139758	3.AD/1.YC	GABA_neurons
chr2:74482670-74483511	ENSG00000115282_TTC31,0;ENSG00000135637_CCDC142,0	ENSG00000135637_CCDC142,0;ENSG00000115282_TTC31,0	-1.07349	5.27888	0.00131784	0.188851	3.AD/1.YC	GABA_neurons
chr2:85771895-85772795		ENSG00000168874_ATOH8,20551	-1.39985	4.71868	0.000174228	0.108035	3.AD/1.YC	GABA_neurons
chr2:95057281-95058134			-2.0302	2.97149	0.00269547	0.232554	3.AD/1.YC	GABA_neurons
chr2:95165234-95166139	ENSG00000144026_ZNF514,0;ENSG00000275111_ZNF2,0	ENSG00000144026_ZNF514,0;ENSG00000275111_ZNF2,0	-1.13801	4.96148	0.00186164	0.213801	3.AD/1.YC	GABA_neurons
chr2:96739672-96740561	ENSG00000114988_LMAN2L,0	ENSG00000114988_LMAN2L,0	-1.08462	4.80852	0.00316789	0.243821	3.AD/1.YC	GABA_neurons
chr2:97645483-97646372	ENSG00000135940_COX5B,0	ENSG00000135940_COX5B,0	-1.08755	4.92293	0.00264547	0.231611	3.AD/1.YC	GABA_neurons
chr2:99335894-99336714	ENSG00000158417_EIF5B,-657	ENSG00000115514_TXNDC9,3988	-1.45202	4.72196	0.00015335	0.105104	3.AD/1.YC	GABA_neurons
chr2:99489768-99490624	ENSG00000135945_REV1,0	ENSG00000135945_REV1,0	-0.911353	5.74845	0.00308432	0.24153	3.AD/1.YC	GABA_neurons
chr2:100291957-100292537		ENSG00000170500_LONRF2,30196	-3.30636	2.05911	0.00190479	0.215371	3.AD/1.YC	GABA_neurons
chr2:100562514-100563446	ENSG00000115539_PDCL3,0	ENSG00000115539_PDCL3,0	-1.34374	5.52141	3.25297e-05	0.0608391	3.AD/1.YC	GABA_neurons
chr2:101364635-101365453		ENSG00000175874_CREG2,22050	-2.75831	2.46367	0.00235708	0.226627	3.AD/1.YC	GABA_neurons
chr2:107036080-107036994			-3.57881	2.31864	0.00114579	0.182559	3.AD/1.YC	GABA_neurons
chr2:112275129-112275873	ENSG00000188177_ZC3H6,0	ENSG00000188177_ZC3H6,0	-1.17038	5.45733	0.000523349	0.152366	3.AD/1.YC	GABA_neurons
chr2:112584041-112584972	ENSG00000125611_CHCHD5,0	ENSG00000125611_CHCHD5,0	-1.29013	5.42923	0.000124574	0.096729	3.AD/1.YC	GABA_neurons
chr2:121476413-121477184		ENSG00000074054_CLASP1,172403	-1.90883	3.10061	0.00216521	0.221293	3.AD/1.YC	GABA_neurons
chr2:121649126-121650015	ENSG00000236859_NIFK-AS1,0;ENSG00000074054_CLASP1,0	ENSG00000074054_CLASP1,0;ENSG00000236859_NIFK-AS1,0	-1.06426	4.99401	0.00220557	0.222348	3.AD/1.YC	GABA_neurons
chr2:124325870-124326730		ENSG00000155052_CNTNAP5,300583	-7.0013	1.45285	0.00254056	0.229325	3.AD/1.YC	GABA_neurons
chr2:127387655-127388352	ENSG00000236682_MAP3K2-DT,0;ENSG00000169967_MAP3K2,113	ENSG00000236682_MAP3K2-DT,0;ENSG00000169967_MAP3K2,113	-1.02555	5.14739	0.00307623	0.24153	3.AD/1.YC	GABA_neurons
chr2:127508385-127509258		ENSG00000163166_IWS1,17628;ENSG00000231731_AC010976.1,52991	-2.38143	3.1369	0.000339847	0.128685	3.AD/1.YC	GABA_neurons
chr2:127526180-127527074	ENSG00000163166_IWS1,0	ENSG00000163166_IWS1,0	-1.24496	4.89136	0.000564981	0.155891	3.AD/1.YC	GABA_neurons
chr2:130342339-130343120	ENSG00000136710_CCDC115,0;ENSG00000136718_IMP4,114	ENSG00000136710_CCDC115,0;ENSG00000136718_IMP4,114	-1.06747	5.71272	0.000882721	0.174613	3.AD/1.YC	GABA_neurons
chr2:134118060-134118914	ENSG00000152127_MGAT5,-1069		-1.97352	3.17816	0.00160167	0.201952	3.AD/1.YC	GABA_neurons
chr2:134119542-134120439	ENSG00000152127_MGAT5,0	ENSG00000152127_MGAT5,0	-1.19399	4.78457	0.00103567	0.177858	3.AD/1.YC	GABA_neurons
chr2:135187218-135188048		ENSG00000121988_ZRANB3,343170	-2.0432	2.99488	0.00215957	0.221293	3.AD/1.YC	GABA_neurons
chr2:135741339-135742180	ENSG00000144224_UBXN4,0	ENSG00000144224_UBXN4,0	-1.17602	5.27332	0.000730994	0.167506	3.AD/1.YC	GABA_neurons
chr2:135985128-135986049	ENSG00000231890_DARS-AS1,0;ENSG00000115866_DARS,51	ENSG00000231890_DARS-AS1,0;ENSG00000115866_DARS,51	-1.25593	4.75996	0.000558067	0.15553	3.AD/1.YC	GABA_neurons
chr2:142665221-142665984			-7.18312	1.57102	0.00105642	0.178275	3.AD/1.YC	GABA_neurons
chr2:147365444-147366234			-7.33314	1.70959	0.000657671	0.162591	3.AD/1.YC	GABA_neurons
chr2:148816931-148817860			-1.98096	3.32556	0.00116223	0.183552	3.AD/1.YC	GABA_neurons
chr2:148874795-148875681	ENSG00000168280_KIF5C,0	ENSG00000168280_KIF5C,0;ENSG00000231079_AC105402.3,13142	-1.07422	5.18827	0.00181273	0.211862	3.AD/1.YC	GABA_neurons
chr2:148962716-148963569		ENSG00000168280_KIF5C,87489	-2.35858	2.57291	0.0029596	0.239509	3.AD/1.YC	GABA_neurons
chr2:149971792-149972712		ENSG00000231969_AC007364.1,384596	-4.12723	1.9122	0.000922466	0.175719	3.AD/1.YC	GABA_neurons
chr2:150487320-150488224		ENSG00000115963_RND3,50787	-2.0228	3.88609	4.67788e-05	0.0617097	3.AD/1.YC	GABA_neurons
chr2:154697196-154698076	ENSG00000287900_AC061961.1,0;ENSG00000162989_KCNJ3,0	ENSG00000287900_AC061961.1,0;ENSG00000162989_KCNJ3,0	-1.45787	4.31856	0.000445505	0.142662	3.AD/1.YC	GABA_neurons
chr2:161426800-161427637		ENSG00000144290_SLC4A10,2468;ENSG00000251621_AC009487.3,2785	-2.52604	2.53207	0.0021802	0.221421	3.AD/1.YC	GABA_neurons
chr2:162343693-162344588		ENSG00000115271_GCA,24853	-0.95873	5.58014	0.00316624	0.243821	3.AD/1.YC	GABA_neurons
chr2:166148777-166149591	ENSG00000144285_SCN1A,0	ENSG00000144285_SCN1A,0;ENSG00000236107_SCN1A-AS1,191589	-2.33815	2.61305	0.00334006	0.248511	3.AD/1.YC	GABA_neurons
chr2:170928739-170929616	ENSG00000115806_GORASP2,275	ENSG00000115806_GORASP2,275	-1.14788	5.64008	0.000266432	0.120151	3.AD/1.YC	GABA_neurons
chr2:172944089-172944987		ENSG00000091428_RAPGEF4,208815	-3.47074	2.14188	0.000905308	0.175096	3.AD/1.YC	GABA_neurons
chr2:173965111-173966020	ENSG00000172845_SP3,0	ENSG00000172845_SP3,0	-1.00686	5.58003	0.00144973	0.195338	3.AD/1.YC	GABA_neurons
chr2:176087996-176088863			-7.32088	1.54831	0.000762357	0.167506	3.AD/1.YC	GABA_neurons
chr2:177212217-177213046	ENSG00000170144_HNRNPA3,0;ENSG00000229337_AC079305.3,0	ENSG00000229337_AC079305.3,0;ENSG00000170144_HNRNPA3,0	-1.43418	5.8842	4.87533e-06	0.0528242	3.AD/1.YC	GABA_neurons
chr2:180983508-180984425		ENSG00000170035_UBE2E3,16260	-2.63596	2.55499	0.0012717	0.186643	3.AD/1.YC	GABA_neurons
chr2:182318225-182319147		ENSG00000115252_PDE1A,204045	-7.80022	2.02157	3.89362e-05	0.0608391	3.AD/1.YC	GABA_neurons
chr2:183081790-183082595		ENSG00000162999_DUSP19,3231	-3.42071	2.11037	0.00129243	0.187646	3.AD/1.YC	GABA_neurons
chr2:183123964-183124863		ENSG00000163002_NUP35,6451	-1.18396	4.63395	0.00191728	0.215628	3.AD/1.YC	GABA_neurons
chr2:186699561-186700222		ENSG00000144369_FAM171B,5501	-7.55595	1.75544	0.000181445	0.108655	3.AD/1.YC	GABA_neurons
chr2:190404307-190405149			-3.09037	2.33827	0.00124381	0.185136	3.AD/1.YC	GABA_neurons
chr2:191811769-191812664		ENSG00000225884_AC098872.1,18972	-1.28992	4.23561	0.00265547	0.231611	3.AD/1.YC	GABA_neurons
chr2:192148835-192149613		ENSG00000144339_TMEFF2,45320	-2.6453	2.62221	0.00152566	0.198941	3.AD/1.YC	GABA_neurons
chr2:192194650-192195539	ENSG00000144339_TMEFF2,0	ENSG00000144339_TMEFF2,0	-1.03445	5.58697	0.00145209	0.195338	3.AD/1.YC	GABA_neurons
chr2:197452942-197453846	ENSG00000115520_COQ10B,0	ENSG00000115520_COQ10B,0	-1.08504	5.61367	0.000811733	0.169968	3.AD/1.YC	GABA_neurons
chr2:198499263-198500184		ENSG00000225421_AC019330.1,272172;ENSG00000115896_PLCL1,694670	-7.73198	1.9523	5.98435e-05	0.073012	3.AD/1.YC	GABA_neurons
chr2:198927715-198928642		ENSG00000231557_AC020718.1,143149	-6.99782	1.50451	0.00284614	0.236386	3.AD/1.YC	GABA_neurons
chr2:199463127-199464027		ENSG00000225953_SATB2-AS1,5427;ENSG00000119042_SATB2,7239	-2.24527	3.19245	0.000645387	0.162591	3.AD/1.YC	GABA_neurons
chr2:199471135-199471980	ENSG00000119042_SATB2,0	ENSG00000119042_SATB2,0;ENSG00000225953_SATB2-AS1,13435	-2.75511	2.71284	0.000917875	0.175719	3.AD/1.YC	GABA_neurons
chr2:199910912-199911765	ENSG00000232732_AC097717.1,0;ENSG00000178074_C2orf69,0	ENSG00000232732_AC097717.1,0;ENSG00000178074_C2orf69,0	-1.32589	5.16863	8.81156e-05	0.0838787	3.AD/1.YC	GABA_neurons
chr2:200864193-200865035	ENSG00000013441_CLK1,0	ENSG00000013441_CLK1,0	-1.45753	5.10516	1.95005e-05	0.0528242	3.AD/1.YC	GABA_neurons
chr2:201177199-201178045			-3.29942	1.95031	0.00322354	0.245317	3.AD/1.YC	GABA_neurons
chr2:201780588-201781524	ENSG00000003393_ALS2,0	ENSG00000003393_ALS2,0	-1.17395	5.14505	0.000761298	0.167506	3.AD/1.YC	GABA_neurons
chr2:202265267-202266187	ENSG00000055044_NOP58,0	ENSG00000055044_NOP58,0	-1.41265	4.84623	0.000100782	0.0891526	3.AD/1.YC	GABA_neurons
chr2:202911535-202912420	ENSG00000138380_CARF,0	ENSG00000138380_CARF,0;ENSG00000138442_WDR12,102378	-1.34535	4.49999	0.000987997	0.176149	3.AD/1.YC	GABA_neurons
chr2:206443085-206443999	ENSG00000114948_ADAM23,0	ENSG00000114948_ADAM23,0	-0.969926	5.51521	0.00325438	0.246241	3.AD/1.YC	GABA_neurons
chr2:206781355-206782253		ENSG00000118246_FASTKD2,15998	-7.29858	1.59841	0.000673892	0.163391	3.AD/1.YC	GABA_neurons
chr2:207529504-207530396	ENSG00000118260_CREB1,0;ENSG00000223725_AC009226.1,0	ENSG00000223725_AC009226.1,0;ENSG00000118260_CREB1,0	-1.25902	5.73908	7.88918e-05	0.0813341	3.AD/1.YC	GABA_neurons
chr2:207711135-207712029	ENSG00000163249_CCNYL1,0	ENSG00000163249_CCNYL1,0	-0.993056	5.54672	0.00212009	0.221293	3.AD/1.YC	GABA_neurons
chr2:210170977-210171691	ENSG00000144445_KANSL1L,0;ENSG00000279317_AC006994.2,0	ENSG00000144445_KANSL1L,0;ENSG00000279317_AC006994.2,0	-1.03466	5.23103	0.00197773	0.21631	3.AD/1.YC	GABA_neurons
chr2:216799840-216800641	ENSG00000229352_AC007563.1,232	ENSG00000229352_AC007563.1,232;ENSG00000236886_AC007563.2,105376	-2.41004	2.70624	0.00260039	0.230677	3.AD/1.YC	GABA_neurons
chr2:218269877-218270774	ENSG00000127837_AAMP,0;ENSG00000127838_PNKD,0	ENSG00000127837_AAMP,0;ENSG00000127838_PNKD,0	-1.06492	5.92916	0.000698851	0.165837	3.AD/1.YC	GABA_neurons
chr2:218954636-218955557		ENSG00000235024_AC097468.2,6346	-1.94004	3.72241	0.000325223	0.12686	3.AD/1.YC	GABA_neurons
chr2:219735983-219736850		ENSG00000227308_LINC02832,50602	-8.01923	2.12468	2.77732e-05	0.0571172	3.AD/1.YC	GABA_neurons
chr2:220034038-220034969			-7.30896	1.69217	0.000676469	0.163692	3.AD/1.YC	GABA_neurons
chr2:223612780-223613685			-1.34249	4.237	0.00217688	0.221293	3.AD/1.YC	GABA_neurons
chr2:227406003-227406848			-3.25568	2.7789	4.31434e-05	0.0608391	3.AD/1.YC	GABA_neurons
chr2:231016961-231017864		ENSG00000173699_SPATA3,26637	-2.00268	3.00568	0.00318067	0.244344	3.AD/1.YC	GABA_neurons
chr2:231706607-231707358	ENSG00000187514_PTMA,0	ENSG00000187514_PTMA,0	-1.17154	5.16108	0.000730832	0.167506	3.AD/1.YC	GABA_neurons
chr2:231707856-231708779	ENSG00000187514_PTMA,961	ENSG00000187514_PTMA,961	-1.06991	6.09682	0.000746819	0.167506	3.AD/1.YC	GABA_neurons
chr2:232374147-232375028			-4.25211	2.06345	0.000678461	0.163719	3.AD/1.YC	GABA_neurons
chr2:233209314-233210239	ENSG00000085978_ATG16L1,0	ENSG00000085978_ATG16L1,0	-2.26151	3.02272	0.000765278	0.167506	3.AD/1.YC	GABA_neurons
chr2:239801641-239802553		ENSG00000220256_AC093802.1,38781	-2.87583	2.55103	0.00137392	0.191849	3.AD/1.YC	GABA_neurons
chr2:241149040-241149879	ENSG00000115685_PPP1R7,0;ENSG00000115687_PASK,385	ENSG00000115685_PPP1R7,0;ENSG00000115687_PASK,385	-1.12391	4.99917	0.00155352	0.199992	3.AD/1.YC	GABA_neurons
chr2:241315149-241315818	ENSG00000168385_SEPTIN2,49;ENSG00000115677_HDLBP,1243	ENSG00000168385_SEPTIN2,49;ENSG00000115677_HDLBP,1243	-1.23349	5.5427	0.000137672	0.0993997	3.AD/1.YC	GABA_neurons
chr2:241686471-241687392	ENSG00000168393_DTYMK,0;ENSG00000168395_ING5,0	ENSG00000168393_DTYMK,0;ENSG00000168395_ING5,0	-1.07545	5.55167	0.0010236	0.177121	3.AD/1.YC	GABA_neurons
chr20:1711642-1712509			-3.49955	2.20554	0.00120805	0.184806	3.AD/1.YC	GABA_neurons
chr20:4064272-4065098			2.11243	3.00597	0.0020235	0.218339	3.AD/1.YC	GABA_neurons
chr20:5610572-5611445	ENSG00000125772_GPCPD1,0	ENSG00000125772_GPCPD1,0	-1.21807	5.22896	0.000405645	0.139401	3.AD/1.YC	GABA_neurons
chr20:5870318-5871237			-3.29029	2.03454	0.00271887	0.23307	3.AD/1.YC	GABA_neurons
chr20:8534053-8535017		ENSG00000182621_PLCB1,456802	-3.07085	2.28818	0.00148152	0.19735	3.AD/1.YC	GABA_neurons
chr20:9838490-9839316	ENSG00000101349_PAK5,0	ENSG00000101349_PAK5,0;ENSG00000286470_AL034427.1,2934	-1.10352	4.95794	0.00212799	0.221293	3.AD/1.YC	GABA_neurons
chr20:10433987-10434781	ENSG00000149346_SLX4IP,-524;ENSG00000125863_MKKS,0	ENSG00000125863_MKKS,0	-1.19254	5.21386	0.000401104	0.139401	3.AD/1.YC	GABA_neurons
chr20:10434899-10435482	ENSG00000125863_MKKS,-677;ENSG00000149346_SLX4IP,0	ENSG00000149346_SLX4IP,0	-1.27248	4.63189	0.00116939	0.183552	3.AD/1.YC	GABA_neurons
chr20:10511190-10512076		ENSG00000149346_SLX4IP,75885	-3.21335	2.43867	0.000845392	0.170867	3.AD/1.YC	GABA_neurons
chr20:13995022-13995867	ENSG00000172264_MACROD2,0;ENSG00000101251_SEL1L2,576	ENSG00000172264_MACROD2,0;ENSG00000101251_SEL1L2,576	-1.27983	4.9769	0.000224213	0.118057	3.AD/1.YC	GABA_neurons
chr20:14337219-14338099	ENSG00000125848_FLRT3,0	ENSG00000125848_FLRT3,0;ENSG00000172264_MACROD2,341850	-1.58225	4.00927	0.000679386	0.163719	3.AD/1.YC	GABA_neurons
chr20:17138011-17138871			-7.39368	1.79142	0.000538139	0.153537	3.AD/1.YC	GABA_neurons
chr20:17682009-17682904	ENSG00000125844_RRBP1,0	ENSG00000125844_RRBP1,0	-0.92085	6.01178	0.00242451	0.22814	3.AD/1.YC	GABA_neurons
chr20:17968347-17969263	ENSG00000089006_SNX5,0;ENSG00000125871_MGME1,0	ENSG00000089006_SNX5,0;ENSG00000125871_MGME1,0;ENSG00000125850_OVOL2,89925	-1.0333	5.59609	0.00127335	0.186643	3.AD/1.YC	GABA_neurons
chr20:18287913-18288837	ENSG00000125846_ZNF133,0	ENSG00000125846_ZNF133,0	-1.08593	5.3916	0.000948991	0.175719	3.AD/1.YC	GABA_neurons
chr20:19003659-19004530		ENSG00000274863_AL135936.1,52266	-3.97829	1.86022	0.00216071	0.221293	3.AD/1.YC	GABA_neurons
chr20:21302948-21303820	ENSG00000088930_XRN2,0;ENSG00000275457_AL117332.1,0	ENSG00000275457_AL117332.1,0;ENSG00000088930_XRN2,0	-1.13832	5.26743	0.000861962	0.173075	3.AD/1.YC	GABA_neurons
chr20:21508241-21509075			-1.78599	3.26288	0.00327126	0.246723	3.AD/1.YC	GABA_neurons
chr20:24992311-24993182	ENSG00000286444_AL035661.2,0;ENSG00000101474_APMAP,0	ENSG00000101474_APMAP,0;ENSG00000286444_AL035661.2,0	-1.0135	5.30954	0.0021697	0.221293	3.AD/1.YC	GABA_neurons
chr20:31723226-31724124	ENSG00000171552_BCL2L1,0;ENSG00000281376_ABALON,1719	ENSG00000171552_BCL2L1,0;ENSG00000281376_ABALON,1719	-0.940354	5.74108	0.00237672	0.227387	3.AD/1.YC	GABA_neurons
chr20:31951587-31952461	ENSG00000088356_PDRG1,0	ENSG00000088356_PDRG1,0	-1.58172	4.17557	0.000531281	0.153364	3.AD/1.YC	GABA_neurons
chr20:33410968-33411876		ENSG00000101400_SNTA1,32016	-3.33552	2.54314	0.000274203	0.121212	3.AD/1.YC	GABA_neurons
chr20:33993059-33993925	ENSG00000125970_RALY,0;ENSG00000285230_RALY-AS1,432	ENSG00000125970_RALY,0;ENSG00000285230_RALY-AS1,432	-0.920032	6.46042	0.00267878	0.231765	3.AD/1.YC	GABA_neurons
chr20:34111821-34112751	ENSG00000125977_EIF2S2,0	ENSG00000125977_EIF2S2,0	-1.07415	4.96753	0.00229783	0.224427	3.AD/1.YC	GABA_neurons
chr20:34302711-34303641		ENSG00000101444_AHCY,8161	-0.948742	5.50463	0.00334064	0.248511	3.AD/1.YC	GABA_neurons
chr20:34676690-34677560		ENSG00000101464_PIGU,21230	-1.08255	5.08645	0.00184253	0.213801	3.AD/1.YC	GABA_neurons
chr20:34875982-34876917		ENSG00000131069_ACSS2,3836	-1.17319	5.55322	0.000594452	0.157857	3.AD/1.YC	GABA_neurons
chr20:35771623-35772560	ENSG00000025293_PHF20,0	ENSG00000025293_PHF20,0	-1.00292	5.92866	0.00178618	0.210707	3.AD/1.YC	GABA_neurons
chr20:35818890-35819810		ENSG00000025293_PHF20,46916	-2.41644	2.84536	0.000958475	0.176149	3.AD/1.YC	GABA_neurons
chr20:38033165-38034076	ENSG00000101407_TTI1,0;ENSG00000101413_RPRD1B,0	ENSG00000101407_TTI1,0;ENSG00000101413_RPRD1B,0	-1.2311	4.67956	0.00117677	0.183552	3.AD/1.YC	GABA_neurons
chr20:38747848-38748742	ENSG00000101442_ACTR5,0	ENSG00000101442_ACTR5,0	-1.18777	5.36073	0.000290203	0.122348	3.AD/1.YC	GABA_neurons
chr20:41028246-41029136	ENSG00000198900_TOP1,0	ENSG00000198900_TOP1,0	-1.37389	5.62095	2.51919e-05	0.057058	3.AD/1.YC	GABA_neurons
chr20:41670518-41671341			-3.4371	2.21249	0.00189843	0.215256	3.AD/1.YC	GABA_neurons
chr20:43457343-43458232	ENSG00000124193_SRSF6,0	ENSG00000124193_SRSF6,0	-1.06133	5.60817	0.000807422	0.169968	3.AD/1.YC	GABA_neurons
chr20:45812030-45812939	ENSG00000175063_UBE2C,0	ENSG00000175063_UBE2C,0	-0.973374	5.35594	0.00302789	0.240414	3.AD/1.YC	GABA_neurons
chr20:45934546-45935463	ENSG00000100982_PCIF1,0;ENSG00000285796_AL162458.1,0	ENSG00000285796_AL162458.1,0;ENSG00000100982_PCIF1,0	-1.12028	6.00039	0.000290078	0.122348	3.AD/1.YC	GABA_neurons
chr20:47501466-47502355	ENSG00000124151_NCOA3,0	ENSG00000124151_NCOA3,0	-1.22854	4.73476	0.000885411	0.174613	3.AD/1.YC	GABA_neurons
chr20:48656405-48657236	ENSG00000286159_AL035106.1,0	ENSG00000286159_AL035106.1,0;ENSG00000124126_PREX1,170763	-1.66751	3.55498	0.00238628	0.227387	3.AD/1.YC	GABA_neurons
chr20:50103419-50104296		ENSG00000244687_UBE2V1,11663	-2.89675	2.4875	0.000715709	0.167506	3.AD/1.YC	GABA_neurons
chr20:50165731-50166579	ENSG00000237595_LINC01275,0;ENSG00000234698_AL161937.1,0	ENSG00000237595_LINC01275,0;ENSG00000234698_AL161937.1,0	-1.65681	3.75206	0.00196451	0.216117	3.AD/1.YC	GABA_neurons
chr20:54573619-54574506		ENSG00000101134_DOK5,98026	-7.95694	2.10347	4.22478e-05	0.0608391	3.AD/1.YC	GABA_neurons
chr20:56111716-56112619			-2.47508	2.90539	0.000922277	0.175719	3.AD/1.YC	GABA_neurons
chr20:61958984-61959833		ENSG00000130699_TAF4,105977	-2.98006	3.05347	3.8855e-05	0.0608391	3.AD/1.YC	GABA_neurons
chr20:62121801-62122701	ENSG00000149657_LSM14B,0	ENSG00000149657_LSM14B,0	-1.32471	5.67223	3.42344e-05	0.0608391	3.AD/1.YC	GABA_neurons
chr20:62795245-62795881	ENSG00000101189_MRGBP,-592		-1.40458	4.14708	0.00231055	0.224618	3.AD/1.YC	GABA_neurons
chr20:62845848-62846609		ENSG00000101190_TCFL5,15213	-2.56717	2.5748	0.00210887	0.221107	3.AD/1.YC	GABA_neurons
chr21:16588145-16589056		ENSG00000215386_MIR99AHG,659849	-1.51655	4.28266	0.000432132	0.141753	3.AD/1.YC	GABA_neurons
chr21:16981613-16982532			-7.02154	1.46773	0.00249563	0.229325	3.AD/1.YC	GABA_neurons
chr21:21000408-21001301	ENSG00000154654_NCAM2,1999	ENSG00000154654_NCAM2,1999	-2.85658	2.53071	0.00125528	0.186119	3.AD/1.YC	GABA_neurons
chr21:26170355-26171235	ENSG00000273492_AP000229.1,0;ENSG00000142192_APP,0	ENSG00000142192_APP,0;ENSG00000273492_AP000229.1,0;ENSG00000224541_AP001439.1,12264	-1.08528	5.01175	0.00193422	0.215676	3.AD/1.YC	GABA_neurons
chr21:27297954-27298795			-3.4602	2.22243	0.00137783	0.191849	3.AD/1.YC	GABA_neurons
chr21:29002395-29003283			-1.21233	4.80142	0.000907597	0.175096	3.AD/1.YC	GABA_neurons
chr21:29763447-29764380		ENSG00000174680_GRIK1-AS1,15272;ENSG00000171189_GRIK1,175653	-3.31355	2.1132	0.00255506	0.229325	3.AD/1.YC	GABA_neurons
chr21:31731720-31732642	ENSG00000156304_SCAF4,0	ENSG00000156304_SCAF4,0	-0.943352	5.62685	0.00274534	0.234383	3.AD/1.YC	GABA_neurons
chr21:32135534-32136387		ENSG00000230323_LINC00159,61426	-2.38447	3.09522	0.00025494	0.119486	3.AD/1.YC	GABA_neurons
chr21:32771492-32772298	ENSG00000159086_PAXBP1,0;ENSG00000205930_C21orf62-AS1,0	ENSG00000159086_PAXBP1,0;ENSG00000205930_C21orf62-AS1,0	-1.33844	4.91173	0.000242861	0.118322	3.AD/1.YC	GABA_neurons
chr21:33025307-33026184	ENSG00000205927_OLIG2,0	ENSG00000205927_OLIG2,0;ENSG00000227757_AP000282.1,44920	-2.03834	3.51794	0.000322107	0.12686	3.AD/1.YC	GABA_neurons
chr21:33542536-33543398	ENSG00000159140_SON,0;ENSG00000159131_GART,93	ENSG00000159140_SON,0;ENSG00000159131_GART,93	-0.952642	5.47322	0.00310982	0.242392	3.AD/1.YC	GABA_neurons
chr21:33641680-33642447	ENSG00000205726_ITSN1,0;ENSG00000205758_CRYZL1,1479	ENSG00000205726_ITSN1,0;ENSG00000205758_CRYZL1,1479	-0.878133	6.2165	0.00334173	0.248511	3.AD/1.YC	GABA_neurons
chr21:34614791-34615683	ENSG00000159200_RCAN1,0	ENSG00000159200_RCAN1,0	-0.981362	5.63617	0.00208272	0.22041	3.AD/1.YC	GABA_neurons
chr21:35931974-35932917		ENSG00000159216_RUNX1,71750	-3.30154	2.04747	0.00194329	0.215676	3.AD/1.YC	GABA_neurons
chr21:36060017-36060903	ENSG00000236677_AP000688.4,0	ENSG00000236677_AP000688.4,0;ENSG00000185917_SETD4,18486	-1.10648	5.23588	0.000840321	0.170867	3.AD/1.YC	GABA_neurons
chr21:37072565-37073407	ENSG00000185808_PIGP,0;ENSG00000182670_TTC3,0	ENSG00000185808_PIGP,0;ENSG00000182670_TTC3,0	-1.02662	5.6449	0.0016942	0.20723	3.AD/1.YC	GABA_neurons
chr21:37267215-37268080	ENSG00000272948_AP001412.1,0;ENSG00000157538_VPS26C,0	ENSG00000157538_VPS26C,0;ENSG00000272948_AP001412.1,0	-0.965633	5.6902	0.00243831	0.228527	3.AD/1.YC	GABA_neurons
chr21:37563590-37564410			-1.342	4.90174	0.000134328	0.0993997	3.AD/1.YC	GABA_neurons
chr21:38942601-38943538		ENSG00000205622_AP001042.1,12929	-3.79751	2.44712	0.000158716	0.107047	3.AD/1.YC	GABA_neurons
chr21:39313388-39314147	ENSG00000238141_BRWD1-AS1,-1560;ENSG00000255568_BRWD1-AS2,0	ENSG00000255568_BRWD1-AS2,0;ENSG00000185658_BRWD1,7412	-1.0131	5.12037	0.00249337	0.229325	3.AD/1.YC	GABA_neurons
chr21:39445312-39446221	ENSG00000157578_LCA5L,0;ENSG00000185437_SH3BGR,0	ENSG00000157578_LCA5L,0;ENSG00000185437_SH3BGR,0	-1.05498	4.99	0.00248252	0.229325	3.AD/1.YC	GABA_neurons
chr21:41691091-41691892		ENSG00000227702_LINC00111,11910	-3.6238	2.332	0.000784776	0.169506	3.AD/1.YC	GABA_neurons
chr21:42219927-42220712		ENSG00000160179_ABCG1,20238	-1.79582	4.04831	0.00016145	0.107047	3.AD/1.YC	GABA_neurons
chr21:42879076-42879926	ENSG00000160193_WDR4,0;ENSG00000160194_NDUFV3,0	ENSG00000160193_WDR4,0;ENSG00000160194_NDUFV3,0	-1.03651	4.98221	0.00279831	0.236254	3.AD/1.YC	GABA_neurons
chr21:43646420-43647287		ENSG00000160207_HSF2BP,12201	-1.69453	3.43791	0.00250356	0.229325	3.AD/1.YC	GABA_neurons
chr21:43789022-43789948	ENSG00000160214_RRP1,0	ENSG00000160214_RRP1,0	-1.03992	5.2156	0.00192834	0.215676	3.AD/1.YC	GABA_neurons
chr21:44817484-44818315	ENSG00000184900_SUMO3,464	ENSG00000184900_SUMO3,464	-1.14692	5.29438	0.00076244	0.167506	3.AD/1.YC	GABA_neurons
chr21:44873275-44874201	ENSG00000183255_PTTG1IP,0	ENSG00000183255_PTTG1IP,0	-1.19833	5.11142	0.000446532	0.142662	3.AD/1.YC	GABA_neurons
chr21:46184546-46185184	ENSG00000160284_SPATC1L,-70;ENSG00000228404_AP001468.1,0	ENSG00000228404_AP001468.1,0	-1.47542	3.93873	0.00282116	0.236254	3.AD/1.YC	GABA_neurons
chr21:46323819-46324211	ENSG00000160298_C21orf58,0;ENSG00000160299_PCNT,0	ENSG00000160298_C21orf58,0;ENSG00000160299_PCNT,0	-1.06806	4.90505	0.00254295	0.229325	3.AD/1.YC	GABA_neurons
chr22:17176504-17177413			-7.56828	1.77882	0.000169569	0.108035	3.AD/1.YC	GABA_neurons
chr22:19144292-19145197	ENSG00000100056_ESS2,0	ENSG00000100056_ESS2,0	-1.02004	5.01336	0.00320833	0.244783	3.AD/1.YC	GABA_neurons
chr22:19479295-19480051	ENSG00000070010_UFD1,-93;ENSG00000093009_CDC45,0	ENSG00000093009_CDC45,0	-1.51613	5.08606	1.8214e-05	0.0528242	3.AD/1.YC	GABA_neurons
chr22:20495406-20496309	ENSG00000099910_KLHL22,0;ENSG00000099917_MED15,0	ENSG00000099910_KLHL22,0;ENSG00000099917_MED15,0	-1.09626	5.24688	0.00101644	0.177121	3.AD/1.YC	GABA_neurons
chr22:20858408-20859273	ENSG00000099940_SNAP29,0;ENSG00000241973_PI4KA,144	ENSG00000099940_SNAP29,0;ENSG00000241973_PI4KA,144	-0.937693	5.5851	0.00336855	0.249228	3.AD/1.YC	GABA_neurons
chr22:21001579-21002496	ENSG00000230513_THAP7-AS1,0;ENSG00000184436_THAP7,0	ENSG00000184436_THAP7,0;ENSG00000230513_THAP7-AS1,0	-1.16565	5.43231	0.000508799	0.148977	3.AD/1.YC	GABA_neurons
chr22:23857322-23858186	ENSG00000272973_AP000350.5,-283;ENSG00000133460_SLC2A11,619	ENSG00000133460_SLC2A11,619	-1.14311	5.11533	0.000831448	0.170867	3.AD/1.YC	GABA_neurons
chr22:24259192-24260083			-7.28547	1.53556	0.000765958	0.167506	3.AD/1.YC	GABA_neurons
chr22:26672467-26673339	ENSG00000206028_Z99774.1,0;ENSG00000244625_MIATNB,0	ENSG00000206028_Z99774.1,0;ENSG00000244625_MIATNB,0;ENSG00000225783_MIAT,26056	-1.11504	4.8043	0.00252422	0.229325	3.AD/1.YC	GABA_neurons
chr22:30423616-30424487	ENSG00000099999_RNF215,-1845;ENSG00000242114_MTFP1,-1136	ENSG00000100003_SEC14L2,26675	-1.16189	5.53523	0.000336067	0.128443	3.AD/1.YC	GABA_neurons
chr22:31943937-31944881	ENSG00000128245_YWHAH,0;ENSG00000128254_C22orf24,637	ENSG00000128245_YWHAH,0;ENSG00000128254_C22orf24,637	-1.00489	5.52019	0.00158002	0.200738	3.AD/1.YC	GABA_neurons
chr22:32707725-32708440		ENSG00000185666_SYN3,349932	2.57732	3.0874	0.000491386	0.148121	3.AD/1.YC	GABA_neurons
chr22:34072591-34073522		ENSG00000236052_LINC01643,55169	-7.77683	2.00402	4.085e-05	0.0608391	3.AD/1.YC	GABA_neurons
chr22:39532368-39533229	ENSG00000187051_RPS19BP1,0	ENSG00000187051_RPS19BP1,0	-1.15681	4.84567	0.00121769	0.184806	3.AD/1.YC	GABA_neurons
chr22:40044075-40044959	ENSG00000261202_Z83847.1,0;ENSG00000100354_TNRC6B,0	ENSG00000261202_Z83847.1,0;ENSG00000100354_TNRC6B,0	-1.38563	5.5995	1.18964e-05	0.0528242	3.AD/1.YC	GABA_neurons
chr22:40856344-40857269	ENSG00000100380_ST13,0;ENSG00000196236_XPNPEP3,0	ENSG00000100380_ST13,0;ENSG00000196236_XPNPEP3,0	-1.21297	5.36113	0.000244624	0.118322	3.AD/1.YC	GABA_neurons
chr22:40950947-40951867	ENSG00000100387_RBX1,0	ENSG00000100387_RBX1,0	-1.07334	5.85947	0.000709329	0.167177	3.AD/1.YC	GABA_neurons
chr22:41446464-41447350	ENSG00000183864_TOB2,0	ENSG00000183864_TOB2,0	-1.06116	5.07504	0.00216113	0.221293	3.AD/1.YC	GABA_neurons
chr22:41448096-41448960	ENSG00000183864_TOB2,-1295		-1.24073	5.43213	0.000159296	0.107047	3.AD/1.YC	GABA_neurons
chr22:41589519-41590404	ENSG00000100417_PMM1,0	ENSG00000100417_PMM1,0	-1.00989	5.86306	0.000983031	0.176149	3.AD/1.YC	GABA_neurons
chr22:42519408-42520306	ENSG00000189306_RRP7A,0	ENSG00000189306_RRP7A,0	-1.1081	4.81981	0.00263235	0.231611	3.AD/1.YC	GABA_neurons
chr22:45817833-45818748		ENSG00000130638_ATXN10,146035	-4.01514	1.80064	0.00208569	0.22041	3.AD/1.YC	GABA_neurons
chr3:63069-64007			2.66672	2.7137	0.00106597	0.179084	3.AD/1.YC	GABA_neurons
chr3:4294643-4295506		ENSG00000286579_AC023483.1,15989;ENSG00000144455_SUMF1,171767	-2.60618	2.53281	0.00142348	0.195233	3.AD/1.YC	GABA_neurons
chr3:5787605-5788510			-1.78757	3.44657	0.00193169	0.215676	3.AD/1.YC	GABA_neurons
chr3:9022364-9023130		ENSG00000196220_SRGAP3,339923	-2.83558	2.72879	0.000307256	0.124897	3.AD/1.YC	GABA_neurons
chr3:9249226-9250116	ENSG00000235830_SRGAP3-AS4,0	ENSG00000235830_SRGAP3-AS4,0;ENSG00000196220_SRGAP3,112937	-1.21495	4.68003	0.00128218	0.187265	3.AD/1.YC	GABA_neurons
chr3:9396687-9397204	ENSG00000168137_SETD5,-411;ENSG00000206573_THUMPD3-AS1,1375	ENSG00000206573_THUMPD3-AS1,1375	-1.03091	5.46146	0.00204954	0.219603	3.AD/1.YC	GABA_neurons
chr3:11096339-11097248			-1.39198	4.05701	0.00264745	0.231611	3.AD/1.YC	GABA_neurons
chr3:11137035-11137819	ENSG00000196639_HRH1,0	ENSG00000196639_HRH1,0	-1.88885	3.16579	0.00332376	0.248511	3.AD/1.YC	GABA_neurons
chr3:12663733-12664585	ENSG00000132155_RAF1,0	ENSG00000132155_RAF1,0	-1.0555	5.33609	0.00148879	0.197543	3.AD/1.YC	GABA_neurons
chr3:13268877-13269734		ENSG00000144711_IQSEC1,13547	-3.24216	2.09036	0.00326157	0.246241	3.AD/1.YC	GABA_neurons
chr3:14379215-14380058			-7.73755	1.91879	6.0969e-05	0.073012	3.AD/1.YC	GABA_neurons
chr3:14639957-14640850		ENSG00000283392_AC090952.2,37922	-2.37721	3.22302	0.000174622	0.108035	3.AD/1.YC	GABA_neurons
chr3:14651198-14652092	ENSG00000235629_AC090952.1,-1766;ENSG00000154781_CCDC174,0	ENSG00000154781_CCDC174,0	-1.22465	4.99554	0.000476859	0.14755	3.AD/1.YC	GABA_neurons
chr3:23945616-23946417	ENSG00000197885_NKIRAS1,174;ENSG00000174738_NR1D2,330	ENSG00000197885_NKIRAS1,174;ENSG00000174738_NR1D2,330	-1.08936	5.40332	0.00128822	0.187479	3.AD/1.YC	GABA_neurons
chr3:25789711-25790599	ENSG00000151092_NGLY1,0	ENSG00000151092_NGLY1,0;ENSG00000151093_OXSM,6794	-1.32245	4.20938	0.00240107	0.227822	3.AD/1.YC	GABA_neurons
chr3:28348635-28349403	ENSG00000206559_ZCWPW2,0;ENSG00000163512_AZI2,0	ENSG00000163512_AZI2,0;ENSG00000206559_ZCWPW2,0	-1.08302	4.94107	0.00272774	0.233368	3.AD/1.YC	GABA_neurons
chr3:33440122-33441019	ENSG00000153560_UBP1,352	ENSG00000153560_UBP1,352	-1.16609	5.80004	0.000182443	0.108655	3.AD/1.YC	GABA_neurons
chr3:33659379-33659787		ENSG00000163539_CLASP2,58569	-1.80011	3.85845	0.000277629	0.121212	3.AD/1.YC	GABA_neurons
chr3:36992853-36993797	ENSG00000178567_EPM2AIP1,0;ENSG00000076242_MLH1,0	ENSG00000178567_EPM2AIP1,0;ENSG00000076242_MLH1,0	-1.41701	5.83321	5.39482e-06	0.0528242	3.AD/1.YC	GABA_neurons
chr3:37805902-37806776		ENSG00000235257_ITGA9-AS1,55026;ENSG00000144668_ITGA9,353787	-2.04711	3.12893	0.00153571	0.198951	3.AD/1.YC	GABA_neurons
chr3:38136779-38137682	ENSG00000172936_MYD88,-796;ENSG00000060971_ACAA1,0	ENSG00000060971_ACAA1,0	-1.1649	5.61685	0.00020733	0.112868	3.AD/1.YC	GABA_neurons
chr3:38164822-38165677	ENSG00000172939_OXSR1,0	ENSG00000172939_OXSR1,0	-0.958016	5.83405	0.00203099	0.218762	3.AD/1.YC	GABA_neurons
chr3:42148785-42149662		ENSG00000182606_TRAK1,134983	-1.07673	4.87447	0.00282066	0.236254	3.AD/1.YC	GABA_neurons
chr3:42492108-42493011		ENSG00000114812_VIPR1,2809	-2.73539	2.40852	0.00192762	0.215676	3.AD/1.YC	GABA_neurons
chr3:42804078-42804934	ENSG00000181061_HIGD1A,0;ENSG00000144648_ACKR2,0	ENSG00000181061_HIGD1A,0;ENSG00000144648_ACKR2,0;ENSG00000235288_AC099329.1,47494	-1.32973	5.10968	0.000117893	0.0959265	3.AD/1.YC	GABA_neurons
chr3:43755328-43756192			-7.02128	1.43059	0.00249464	0.229325	3.AD/1.YC	GABA_neurons
chr3:44127829-44128746			-2.58687	3.26644	4.8844e-05	0.0630777	3.AD/1.YC	GABA_neurons
chr3:45508993-45509860	ENSG00000232455_LARS2-AS1,0	ENSG00000232455_LARS2-AS1,0;ENSG00000011376_LARS2,120432	-1.62405	4.01257	0.000537459	0.153537	3.AD/1.YC	GABA_neurons
chr3:46976318-46977199		ENSG00000160799_CCDC12,4811	-1.12414	5.28486	0.000935072	0.175719	3.AD/1.YC	GABA_neurons
chr3:47513104-47514039	ENSG00000163832_ELP6,0	ENSG00000163832_ELP6,0	-1.05977	5.46416	0.00177606	0.21012	3.AD/1.YC	GABA_neurons
chr3:47788756-47789646			-1.29555	4.20442	0.00323909	0.245754	3.AD/1.YC	GABA_neurons
chr3:48989570-48990502	ENSG00000178467_P4HTM,0;ENSG00000223343_AC137630.1,0	ENSG00000223343_AC137630.1,0;ENSG00000178467_P4HTM,0	-1.03671	5.15177	0.00207923	0.22041	3.AD/1.YC	GABA_neurons
chr3:49939669-49940546	ENSG00000004534_RBM6,0	ENSG00000004534_RBM6,0	-1.13821	5.27004	0.000690258	0.165075	3.AD/1.YC	GABA_neurons
chr3:50350486-50351409	ENSG00000114395_CYB561D2,0;ENSG00000114388_NPRL2,0	ENSG00000114388_NPRL2,0;ENSG00000114395_CYB561D2,0	-0.96693	5.64269	0.00290902	0.23761	3.AD/1.YC	GABA_neurons
chr3:52253092-52253942			-3.38732	2.92369	3.16496e-05	0.0608391	3.AD/1.YC	GABA_neurons
chr3:52287452-52288370	ENSG00000164091_WDR82,0;ENSG00000168237_GLYCTK,363	ENSG00000164091_WDR82,0;ENSG00000168237_GLYCTK,363	-1.07702	5.22054	0.00194715	0.215676	3.AD/1.YC	GABA_neurons
chr3:52409939-52410798	ENSG00000163930_BAP1,0;ENSG00000010318_PHF7,0	ENSG00000163930_BAP1,0;ENSG00000010318_PHF7,0	-1.01814	6.03192	0.000800487	0.169968	3.AD/1.YC	GABA_neurons
chr3:54002895-54003775			-2.88713	2.20519	0.00295607	0.239402	3.AD/1.YC	GABA_neurons
chr3:57597063-57597980	ENSG00000272146_ARF4-AS1,0;ENSG00000168374_ARF4,240	ENSG00000272146_ARF4-AS1,0;ENSG00000168374_ARF4,240	-1.18924	5.5888	0.000266174	0.120151	3.AD/1.YC	GABA_neurons
chr3:57755748-57756647	ENSG00000163681_SLMAP,298	ENSG00000163681_SLMAP,298	-1.18003	5.06357	0.00102149	0.177121	3.AD/1.YC	GABA_neurons
chr3:61561086-61561990	ENSG00000144724_PTPRG,0	ENSG00000144724_PTPRG,0	-1.12669	4.83667	0.00214161	0.221293	3.AD/1.YC	GABA_neurons
chr3:63064183-63065042		ENSG00000244342_LINC00698,113753	-2.45269	2.68205	0.00182232	0.211915	3.AD/1.YC	GABA_neurons
chr3:66997792-66998673	ENSG00000287873_AC020655.1,0;ENSG00000163376_KBTBD8,0	ENSG00000287873_AC020655.1,0;ENSG00000163376_KBTBD8,0	-0.976632	5.75603	0.00163269	0.203593	3.AD/1.YC	GABA_neurons
chr3:69084565-69085425	ENSG00000144746_ARL6IP5,0	ENSG00000144746_ARL6IP5,0	-1.43682	4.51679	0.000337194	0.128473	3.AD/1.YC	GABA_neurons
chr3:72032215-72033105		ENSG00000241163_LINC00877,246398	-7.66011	1.94542	0.000110401	0.0916328	3.AD/1.YC	GABA_neurons
chr3:72446752-72447677	ENSG00000163602_RYBP,-131		-1.08098	5.14992	0.00159775	0.201665	3.AD/1.YC	GABA_neurons
chr3:77601735-77602641		ENSG00000185008_ROBO2,1695040	-7.50078	1.69305	0.000293304	0.122811	3.AD/1.YC	GABA_neurons
chr3:79418923-79419788		ENSG00000288105_AC117461.1,7209;ENSG00000169855_ROBO1,348210	-7.13793	1.52044	0.00155608	0.200111	3.AD/1.YC	GABA_neurons
chr3:84958467-84959375	ENSG00000175161_CADM2,0	ENSG00000175161_CADM2,0	-1.09121	5.4624	0.00100934	0.176899	3.AD/1.YC	GABA_neurons
chr3:100206382-100207253		ENSG00000287378_AC129803.1,53011	-4.30666	2.11998	0.000734743	0.167506	3.AD/1.YC	GABA_neurons
chr3:107240219-107241128	ENSG00000242759_LINC00882,0	ENSG00000242759_LINC00882,0;ENSG00000243701_DUBR,19475	-1.45673	4.51102	0.000296798	0.123134	3.AD/1.YC	GABA_neurons
chr3:107429582-107430310	ENSG00000273125_LINC01990,-582		-1.57282	3.71023	0.00222721	0.223748	3.AD/1.YC	GABA_neurons
chr3:111978592-111979483	ENSG00000144827_ABHD10,0	ENSG00000144827_ABHD10,0	-1.25067	4.86171	0.00090645	0.175096	3.AD/1.YC	GABA_neurons
chr3:113746699-113747318	ENSG00000121579_NAA50,-399;ENSG00000114573_ATP6V1A,0;ENSG00000242659_AC108693.2,90	ENSG00000114573_ATP6V1A,0;ENSG00000242659_AC108693.2,90	-1.2507	4.70913	0.000749349	0.167506	3.AD/1.YC	GABA_neurons
chr3:115147149-115148050	ENSG00000181722_ZBTB20,0;ENSG00000242880_AC026341.1,0	ENSG00000181722_ZBTB20,0;ENSG00000242880_AC026341.1,0	-1.11167	6.04297	0.000331983	0.128432	3.AD/1.YC	GABA_neurons
chr3:119069462-119070276		ENSG00000144847_IGSF11,75792	-7.08049	1.51107	0.00166365	0.205336	3.AD/1.YC	GABA_neurons
chr3:119498043-119498957	ENSG00000272662_AC073352.1,0;ENSG00000113845_TIMMDC1,0	ENSG00000272662_AC073352.1,0;ENSG00000113845_TIMMDC1,0	-1.10533	5.27034	0.000812576	0.169968	3.AD/1.YC	GABA_neurons
chr3:120094481-120095269	ENSG00000082701_GSK3B,-64;ENSG00000242622_AC092910.3,0	ENSG00000242622_AC092910.3,0	-1.31826	5.93563	2.61617e-05	0.057058	3.AD/1.YC	GABA_neurons
chr3:120907767-120908595	ENSG00000145087_STXBP5L,0;ENSG00000286827_AC072026.2,0	ENSG00000286827_AC072026.2,0;ENSG00000145087_STXBP5L,0	-1.08227	5.01154	0.00171726	0.207502	3.AD/1.YC	GABA_neurons
chr3:123584675-123585581	ENSG00000206527_HACD2,0;ENSG00000239523_MYLK-AS1,0	ENSG00000206527_HACD2,0;ENSG00000239523_MYLK-AS1,0	-0.966321	5.69075	0.00255619	0.229325	3.AD/1.YC	GABA_neurons
chr3:125915810-125916727	ENSG00000248787_AC092903.2,0;ENSG00000241288_LINC02614,0	ENSG00000241288_LINC02614,0;ENSG00000248787_AC092903.2,0	-0.888704	6.26125	0.00267356	0.231641	3.AD/1.YC	GABA_neurons
chr3:126475490-126476415	ENSG00000070476_ZXDC,0	ENSG00000070476_ZXDC,0	-1.05146	5.25566	0.00154462	0.199684	3.AD/1.YC	GABA_neurons
chr3:127382955-127383592		ENSG00000244215_LINC02016,7078	-4.05818	1.94246	0.00140817	0.194292	3.AD/1.YC	GABA_neurons
chr3:128680487-128681362	ENSG00000163902_RPN1,0	ENSG00000163902_RPN1,0	-1.19354	5.58526	0.000293174	0.122811	3.AD/1.YC	GABA_neurons
chr3:129627567-129628450			-1.70144	3.49394	0.00265818	0.231611	3.AD/1.YC	GABA_neurons
chr3:129688101-129688968		ENSG00000172765_TMCC1,204638	-1.39384	4.06046	0.00186833	0.213801	3.AD/1.YC	GABA_neurons
chr3:132090709-132091646		ENSG00000196353_CPNE4,193764	-3.21692	2.05645	0.00304768	0.240606	3.AD/1.YC	GABA_neurons
chr3:133895397-133896277	ENSG00000154917_RAB6B,0	ENSG00000154917_RAB6B,0	-1.10106	5.014	0.00254499	0.229325	3.AD/1.YC	GABA_neurons
chr3:133938620-133939358		ENSG00000174640_SLCO2A1,112826	-2.58205	2.57668	0.00246252	0.228725	3.AD/1.YC	GABA_neurons
chr3:134794776-134795633	ENSG00000286982_AC016931.1,860	ENSG00000286982_AC016931.1,860;ENSG00000154928_EPHB1,196975	-1.2117	4.75566	0.00215747	0.221293	3.AD/1.YC	GABA_neurons
chr3:136752075-136752949	ENSG00000118007_STAG1,0;ENSG00000261758_AC117382.2,0	ENSG00000118007_STAG1,0;ENSG00000261758_AC117382.2,0	-1.29488	5.85153	3.34217e-05	0.0608391	3.AD/1.YC	GABA_neurons
chr3:138400403-138401266		ENSG00000158186_MRAS,52755	-2.37302	2.77499	0.00142943	0.195278	3.AD/1.YC	GABA_neurons
chr3:141311370-141312261		ENSG00000249417_AC117383.1,54876;ENSG00000155893_PXYLP1,82644	-1.03688	5.14428	0.00278108	0.23611	3.AD/1.YC	GABA_neurons
chr3:141386463-141387252		ENSG00000177311_ZBTB38,62250	-1.53347	3.75216	0.00263488	0.231611	3.AD/1.YC	GABA_neurons
chr3:143644160-143645070		ENSG00000181804_SLC9A9,203415	-2.61682	2.5839	0.00204368	0.21942	3.AD/1.YC	GABA_neurons
chr3:143971339-143972218	ENSG00000181744_DIPK2A,0	ENSG00000181744_DIPK2A,0	-1.07421	5.4305	0.00133788	0.190015	3.AD/1.YC	GABA_neurons
chr3:144031592-144032405		ENSG00000181744_DIPK2A,59794	-2.33062	3.07009	0.000559067	0.15553	3.AD/1.YC	GABA_neurons
chr3:150210168-150211104		ENSG00000241048_AC117386.1,14086;ENSG00000243944_AC117386.2,170954	-3.11959	2.38966	0.000893423	0.174814	3.AD/1.YC	GABA_neurons
chr3:150546150-150547041	ENSG00000144895_EIF2A,0	ENSG00000144895_EIF2A,0;ENSG00000120742_SERP1,56187	-1.1938	5.91939	0.00012746	0.0971724	3.AD/1.YC	GABA_neurons
chr3:155870093-155870954	ENSG00000163655_GMPS,0	ENSG00000163655_GMPS,0	-1.16153	5.93067	0.000138434	0.0993997	3.AD/1.YC	GABA_neurons
chr3:157159786-157160681	ENSG00000163660_CCNL1,79	ENSG00000163660_CCNL1,79	-1.10613	5.13853	0.00115879	0.183552	3.AD/1.YC	GABA_neurons
chr3:160904655-160905337		ENSG00000163590_PPM1L,149053	-7.01146	1.46032	0.00251782	0.229325	3.AD/1.YC	GABA_neurons
chr3:161372433-161373156	ENSG00000196542_SPTSSB,0	ENSG00000196542_SPTSSB,0	-1.42599	4.19762	0.00131792	0.188851	3.AD/1.YC	GABA_neurons
chr3:169771569-169772390	ENSG00000085274_MYNN,-441;ENSG00000269889_AC078802.1,1920	ENSG00000269889_AC078802.1,1920	-1.34578	4.11918	0.00260403	0.230833	3.AD/1.YC	GABA_neurons
chr3:169772869-169773813	ENSG00000085274_MYNN,38	ENSG00000085274_MYNN,38	-1.0161	5.23426	0.00226446	0.224427	3.AD/1.YC	GABA_neurons
chr3:170357055-170357768	ENSG00000136603_SKIL,0	ENSG00000136603_SKIL,0	-1.06675	5.20659	0.00138333	0.191849	3.AD/1.YC	GABA_neurons
chr3:170614223-170615075		ENSG00000285051_SLC7A14-AS1,165584	-2.68202	2.64637	0.000988304	0.176149	3.AD/1.YC	GABA_neurons
chr3:172750267-172751150	ENSG00000114346_ECT2,0	ENSG00000114346_ECT2,0	-1.22888	4.93591	0.000860698	0.173075	3.AD/1.YC	GABA_neurons
chr3:179147865-179148692	ENSG00000229102_AC076966.2,0;ENSG00000121879_PIK3CA,0	ENSG00000229102_AC076966.2,0;ENSG00000121879_PIK3CA,0	-1.50521	5.10732	1.55314e-05	0.0528242	3.AD/1.YC	GABA_neurons
chr3:179604268-179605186	ENSG00000136522_MRPL47,0;ENSG00000136521_NDUFB5,0	ENSG00000136522_MRPL47,0;ENSG00000136521_NDUFB5,0	-1.14383	4.91714	0.00110918	0.180237	3.AD/1.YC	GABA_neurons
chr3:179921374-179922203		ENSG00000244302_PEX5L-AS2,23175;ENSG00000114757_PEX5L,114850	-2.24091	3.14074	0.000601818	0.158782	3.AD/1.YC	GABA_neurons
chr3:184185572-184186479	ENSG00000161204_ABCF3,0	ENSG00000161204_ABCF3,0	-1.43622	5.12404	2.76154e-05	0.0571172	3.AD/1.YC	GABA_neurons
chr3:184711582-184712471	ENSG00000177383_MAGEF1,0;ENSG00000272970_AC107294.2,0	ENSG00000177383_MAGEF1,0;ENSG00000272970_AC107294.2,0	-1.21111	4.64063	0.0014987	0.197893	3.AD/1.YC	GABA_neurons
chr3:186013049-186013969			-2.04951	3.34172	0.000717687	0.167506	3.AD/1.YC	GABA_neurons
chr3:186115211-186116125		ENSG00000058866_DGKG,246109	-3.57355	2.22111	0.000436153	0.142311	3.AD/1.YC	GABA_neurons
chr3:186783094-186783776	ENSG00000156976_EIF4A2,0;ENSG00000263826_AC112907.3,403	ENSG00000156976_EIF4A2,0;ENSG00000263826_AC112907.3,403	-1.42464	4.85178	0.000253623	0.119486	3.AD/1.YC	GABA_neurons
chr3:193686490-193687217		ENSG00000198836_OPA1,93346	-3.87924	1.72916	0.00321441	0.244962	3.AD/1.YC	GABA_neurons
chr3:195689199-195690014			-2.41274	2.86596	0.00134835	0.190574	3.AD/1.YC	GABA_neurons
chr3:196711946-196712861	ENSG00000174007_CEP19,0	ENSG00000174007_CEP19,0;ENSG00000163964_PIGX,72171	-0.952752	5.65846	0.00245561	0.228725	3.AD/1.YC	GABA_neurons
chr3:196942090-196942990	ENSG00000114503_NCBP2,0;ENSG00000270170_NCBP2AS2,0	ENSG00000114503_NCBP2,0;ENSG00000270170_NCBP2AS2,0;ENSG00000225578_NCBP2-AS1,2213	-1.26121	4.98217	0.000354153	0.132871	3.AD/1.YC	GABA_neurons
chr4:2261870-2262768	ENSG00000123933_MXD4,0	ENSG00000123933_MXD4,0	-1.01258	6.32154	0.000661555	0.162591	3.AD/1.YC	GABA_neurons
chr4:2418338-2419232	ENSG00000159733_ZFYVE28,0;ENSG00000206113_CFAP99,0	ENSG00000159733_ZFYVE28,0;ENSG00000206113_CFAP99,0	-1.01911	5.44845	0.00185034	0.213801	3.AD/1.YC	GABA_neurons
chr4:4792491-4793199			-7.31586	1.73815	0.000817392	0.169968	3.AD/1.YC	GABA_neurons
chr4:6516519-6517358		ENSG00000074211_PPP2R2C,46242	-2.77373	2.7334	0.000652641	0.162591	3.AD/1.YC	GABA_neurons
chr4:6986708-6987594	ENSG00000287104_AC097382.3,0	ENSG00000287104_AC097382.3,0;ENSG00000132405_TBC1D14,77466	-1.20823	5.25885	0.000274781	0.121212	3.AD/1.YC	GABA_neurons
chr4:7956004-7956913			-7.02102	1.39004	0.00256929	0.229411	3.AD/1.YC	GABA_neurons
chr4:15681276-15682169	ENSG00000237765_FAM200B,0;ENSG00000118564_FBXL5,0	ENSG00000118564_FBXL5,0;ENSG00000237765_FAM200B,0	-1.14921	5.1723	0.000672773	0.163391	3.AD/1.YC	GABA_neurons
chr4:16289677-16290593		ENSG00000263327_TAPT1-AS1,62992	-2.33494	2.76215	0.00171346	0.207502	3.AD/1.YC	GABA_neurons
chr4:16775480-16776385		ENSG00000169744_LDB2,122293	-2.55859	2.60965	0.0028008	0.236254	3.AD/1.YC	GABA_neurons
chr4:17142125-17142992			-3.45807	2.19126	0.00113511	0.181474	3.AD/1.YC	GABA_neurons
chr4:17265342-17266230			-4.63098	2.30633	6.12976e-05	0.073012	3.AD/1.YC	GABA_neurons
chr4:21818829-21819700		ENSG00000185774_KCNIP4,129072	-7.18608	1.48746	0.00113167	0.181452	3.AD/1.YC	GABA_neurons
chr4:24472633-24473453			-1.44006	4.33141	0.000839494	0.170867	3.AD/1.YC	GABA_neurons
chr4:25957735-25958495			-3.26109	2.04862	0.00264705	0.231611	3.AD/1.YC	GABA_neurons
chr4:26860337-26861170	ENSG00000240005_STIM2-AS1,0	ENSG00000240005_STIM2-AS1,0;ENSG00000109689_STIM2,2736	-0.969321	5.46534	0.00314841	0.243083	3.AD/1.YC	GABA_neurons
chr4:28277699-28278576		ENSG00000286321_AC093791.2,51730	-3.39452	2.02287	0.00162423	0.203485	3.AD/1.YC	GABA_neurons
chr4:36944105-36944978			-3.9397	1.77646	0.00298473	0.23996	3.AD/1.YC	GABA_neurons
chr4:39181928-39182829	ENSG00000249207_AC079921.1,0;ENSG00000157796_WDR19,0	ENSG00000249207_AC079921.1,0;ENSG00000157796_WDR19,0	-0.95308	5.51781	0.00297024	0.23958	3.AD/1.YC	GABA_neurons
chr4:40912389-40913312		ENSG00000163697_APBB2,303402	-2.41212	2.80465	0.0010952	0.180237	3.AD/1.YC	GABA_neurons
chr4:44448452-44449335	ENSG00000183783_KCTD8,0	ENSG00000183783_KCTD8,0	-1.13304	5.08968	0.00208974	0.22041	3.AD/1.YC	GABA_neurons
chr4:48779992-48780843	ENSG00000075539_FRYL,0	ENSG00000075539_FRYL,0	-0.928934	5.76617	0.00292244	0.23813	3.AD/1.YC	GABA_neurons
chr4:48830645-48831512		ENSG00000109180_OCIAD1,25433	-1.13413	4.87003	0.00156988	0.200738	3.AD/1.YC	GABA_neurons
chr4:55545812-55546466	ENSG00000272969_AC024243.1,-646;ENSG00000134852_CLOCK,443	ENSG00000134852_CLOCK,443	-1.18846	4.52113	0.00298122	0.239835	3.AD/1.YC	GABA_neurons
chr4:56386930-56387862	ENSG00000157426_AASDH,0;ENSG00000269921_AC068620.1,0	ENSG00000157426_AASDH,0;ENSG00000269921_AC068620.1,0	-1.25245	4.93773	0.000318031	0.126653	3.AD/1.YC	GABA_neurons
chr4:57689331-57690180			-7.03973	1.51588	0.0025981	0.230677	3.AD/1.YC	GABA_neurons
chr4:57764619-57765547			-4.23814	2.04703	0.000975523	0.176149	3.AD/1.YC	GABA_neurons
chr4:61200053-61200803	ENSG00000150471_ADGRL3,-455		-1.60554	4.41594	0.000166916	0.108035	3.AD/1.YC	GABA_neurons
chr4:62822056-62822967			-7.3106	1.67982	0.00065326	0.162591	3.AD/1.YC	GABA_neurons
chr4:75673031-75673902		ENSG00000138757_G3BP2,50623	-1.02262	5.41728	0.00187202	0.213801	3.AD/1.YC	GABA_neurons
chr4:76197751-76198451		ENSG00000138760_SCARB2,36085;ENSG00000286074_AC110795.1,49190	-1.97197	3.04562	0.00278087	0.23611	3.AD/1.YC	GABA_neurons
chr4:78056125-78056841	ENSG00000138759_FRAS1,-482		-2.09138	3.20439	0.00135886	0.191182	3.AD/1.YC	GABA_neurons
chr4:80266182-80267034	ENSG00000138675_FGF5,0	ENSG00000138675_FGF5,0	-2.24538	2.91274	0.00196156	0.216081	3.AD/1.YC	GABA_neurons
chr4:81651770-81652652		ENSG00000138670_RASGEF1B,391592	-3.42019	2.14425	0.00137014	0.191849	3.AD/1.YC	GABA_neurons
chr4:82373747-82374631	ENSG00000272677_AC124016.1,0;ENSG00000138668_HNRNPD,0	ENSG00000138668_HNRNPD,0;ENSG00000272677_AC124016.1,0	-1.01282	5.57289	0.00169031	0.206983	3.AD/1.YC	GABA_neurons
chr4:82900333-82901255	ENSG00000168152_THAP9,0;ENSG00000251022_THAP9-AS1,0;ENSG00000138674_SEC31A,0	ENSG00000138674_SEC31A,0;ENSG00000251022_THAP9-AS1,0;ENSG00000168152_THAP9,0	-1.10824	5.67577	0.000443126	0.142662	3.AD/1.YC	GABA_neurons
chr4:83012535-83013427	ENSG00000189308_LIN54,0	ENSG00000189308_LIN54,0	-1.18217	5.63688	0.000418333	0.139758	3.AD/1.YC	GABA_neurons
chr4:87677571-87678390		ENSG00000249001_AC093895.1,55566	-7.02154	1.46773	0.00249563	0.229325	3.AD/1.YC	GABA_neurons
chr4:87843642-87844552		ENSG00000152595_MEPE,22231	-2.25095	2.71036	0.00253996	0.229325	3.AD/1.YC	GABA_neurons
chr4:99950009-99950934	ENSG00000164032_H2AFZ,0;ENSG00000245322_AC097460.1,3	ENSG00000164032_H2AFZ,0;ENSG00000245322_AC097460.1,3	-1.12194	5.67609	0.000345501	0.130023	3.AD/1.YC	GABA_neurons
chr4:102094291-102095168			-7.18228	1.58595	0.00107489	0.179417	3.AD/1.YC	GABA_neurons
chr4:102826861-102827420	ENSG00000246560_UBE2D3-AS1,-635	ENSG00000109332_UBE2D3,41476	-1.18376	4.54379	0.00232863	0.22566	3.AD/1.YC	GABA_neurons
chr4:102827574-102828347	ENSG00000246560_UBE2D3-AS1,0	ENSG00000246560_UBE2D3-AS1,0;ENSG00000109332_UBE2D3,40549	-1.5401	5.24465	1.18088e-05	0.0528242	3.AD/1.YC	GABA_neurons
chr4:105246415-105247269		ENSG00000168769_TET2,100540	-3.69418	2.3238	0.000205145	0.112561	3.AD/1.YC	GABA_neurons
chr4:112636765-112637676	ENSG00000138658_ZGRF1,0;ENSG00000174720_LARP7,0	ENSG00000138658_ZGRF1,0;ENSG00000174720_LARP7,0	-1.26587	5.2649	0.00017679	0.108035	3.AD/1.YC	GABA_neurons
chr4:113762353-113763076	ENSG00000145349_CAMK2D,-426		-1.64051	4.41481	7.08619e-05	0.0783209	3.AD/1.YC	GABA_neurons
chr4:118122024-118122930		ENSG00000164100_NDST3,88406	-3.48087	2.23718	0.00134003	0.190015	3.AD/1.YC	GABA_neurons
chr4:121704008-121704911			-4.06981	1.88734	0.00221642	0.223251	3.AD/1.YC	GABA_neurons
chr4:128460909-128461704		ENSG00000251432_LINC02615,168158	-7.24538	1.60271	0.000979347	0.176149	3.AD/1.YC	GABA_neurons
chr4:128809336-128810255	ENSG00000077684_JADE1,0	ENSG00000077684_JADE1,0	-1.18497	5.19806	0.000714683	0.167506	3.AD/1.YC	GABA_neurons
chr4:138959139-138960063		ENSG00000250195_AC109927.1,52583	-4.32792	2.13428	0.00046718	0.146057	3.AD/1.YC	GABA_neurons
chr4:139651236-139652103			-2.28297	3.53901	8.19877e-05	0.0825203	3.AD/1.YC	GABA_neurons
chr4:140523678-140524553	ENSG00000179387_ELMOD2,0	ENSG00000179387_ELMOD2,0	-1.06436	5.17646	0.00179904	0.211209	3.AD/1.YC	GABA_neurons
chr4:142585080-142585890		ENSG00000249806_AC139720.1,19061;ENSG00000109452_INPP4B,261542	-7.03157	1.45712	0.00245771	0.228725	3.AD/1.YC	GABA_neurons
chr4:152352387-152353315		ENSG00000109670_FBXW7,182777	-1.35154	4.24911	0.00136637	0.191799	3.AD/1.YC	GABA_neurons
chr4:152535739-152536663	ENSG00000109670_FBXW7,0;ENSG00000268471_MIR4453HG,0	ENSG00000109670_FBXW7,0;ENSG00000268471_MIR4453HG,0	-0.994571	5.61218	0.00196207	0.216081	3.AD/1.YC	GABA_neurons
chr4:153498066-153498861		ENSG00000121210_TMEM131L,31720	-2.15593	3.21902	0.000969236	0.176149	3.AD/1.YC	GABA_neurons
chr4:157220101-157220979		ENSG00000120251_GRIA2,15919	-1.12117	4.8218	0.00191672	0.215628	3.AD/1.YC	GABA_neurons
chr4:163494236-163495097	ENSG00000198498_TMA16,0	ENSG00000198498_TMA16,0	-1.21666	4.60162	0.00133693	0.190015	3.AD/1.YC	GABA_neurons
chr4:177441864-177442796	ENSG00000038002_AGA,0;ENSG00000250131_AC078881.1,0	ENSG00000038002_AGA,0;ENSG00000250131_AC078881.1,0	-1.11313	4.87904	0.0021339	0.221293	3.AD/1.YC	GABA_neurons
chr4:184537319-184538060	ENSG00000271538_LINC02427,0	ENSG00000271538_LINC02427,0	-1.24313	4.67536	0.00095247	0.175719	3.AD/1.YC	GABA_neurons
chr4:184649104-184649977	ENSG00000164305_CASP3,0;ENSG00000164306_PRIMPOL,0	ENSG00000164305_CASP3,0;ENSG00000164306_PRIMPOL,0	-1.03096	5.73501	0.00121208	0.184806	3.AD/1.YC	GABA_neurons
chr4:185142760-185143678	ENSG00000151729_SLC25A4,0	ENSG00000151729_SLC25A4,0	-0.969062	5.40359	0.00312663	0.24247	3.AD/1.YC	GABA_neurons
chr4:185203600-185204497	ENSG00000109762_SNX25,0	ENSG00000109762_SNX25,0;ENSG00000164323_CFAP97,5007	-1.02519	5.02259	0.00286931	0.236386	3.AD/1.YC	GABA_neurons
chr4:185396083-185396875	ENSG00000109771_LRP2BP,-184;ENSG00000186352_ANKRD37,62	ENSG00000186352_ANKRD37,62	-1.18854	5.51505	0.000231467	0.118322	3.AD/1.YC	GABA_neurons
chr4:188127129-188128039			-4.02744	2.56487	2.2874e-05	0.0561254	3.AD/1.YC	GABA_neurons
chr5:53442-54306			2.16013	3.10117	0.00228353	0.224427	3.AD/1.YC	GABA_neurons
chr5:669157-670064		ENSG00000171368_TPPP,23288	-1.54084	4.06068	0.000692604	0.165314	3.AD/1.YC	GABA_neurons
chr5:3139478-3140296			-2.89566	2.25486	0.00316297	0.243821	3.AD/1.YC	GABA_neurons
chr5:5716397-5717307			-7.62396	1.86879	0.000101825	0.0891526	3.AD/1.YC	GABA_neurons
chr5:14011263-14012145			-1.1301	4.64732	0.00320753	0.244783	3.AD/1.YC	GABA_neurons
chr5:16784861-16785772		ENSG00000145555_MYO10,150516	-2.86986	2.96585	5.50669e-05	0.0696119	3.AD/1.YC	GABA_neurons
chr5:18149534-18150467			-2.96265	2.24803	0.00201081	0.217928	3.AD/1.YC	GABA_neurons
chr5:22692855-22693743		ENSG00000154162_CDH12,159601	-3.36071	2.13783	0.00252919	0.229325	3.AD/1.YC	GABA_neurons
chr5:22887341-22888237			-7.34286	1.70346	0.000628239	0.16154	3.AD/1.YC	GABA_neurons
chr5:32312617-32313492	ENSG00000150712_MTMR12,0	ENSG00000150712_MTMR12,0	-1.08574	5.90772	0.000384964	0.136854	3.AD/1.YC	GABA_neurons
chr5:34007579-34008509	ENSG00000242110_AMACR,0	ENSG00000242110_AMACR,0	-0.988214	5.4274	0.00295216	0.239402	3.AD/1.YC	GABA_neurons
chr5:39074028-39074872	ENSG00000164327_RICTOR,0	ENSG00000164327_RICTOR,0	-0.988583	5.27146	0.00305949	0.241187	3.AD/1.YC	GABA_neurons
chr5:42951620-42952503			-3.28551	1.97103	0.00289848	0.23754	3.AD/1.YC	GABA_neurons
chr5:43121026-43121894		ENSG00000172262_ZNF131,55850	-0.941071	5.77557	0.00241079	0.228038	3.AD/1.YC	GABA_neurons
chr5:43313104-43314022	ENSG00000112972_HMGCS1,0	ENSG00000112972_HMGCS1,0	-1.34352	5.7868	1.58845e-05	0.0528242	3.AD/1.YC	GABA_neurons
chr5:44808518-44809342	ENSG00000251141_MRPS30-DT,0;ENSG00000112996_MRPS30,0	ENSG00000251141_MRPS30-DT,0;ENSG00000112996_MRPS30,0	-1.04865	4.961	0.00323809	0.245754	3.AD/1.YC	GABA_neurons
chr5:44829920-44830833			-7.03154	1.47509	0.00247397	0.228963	3.AD/1.YC	GABA_neurons
chr5:57173272-57174206	ENSG00000062194_GPBP1,0	ENSG00000062194_GPBP1,0	-0.943561	6.17314	0.00171126	0.207502	3.AD/1.YC	GABA_neurons
chr5:61449905-61450699		ENSG00000130449_ZSWIM6,117647	-4.39905	2.16598	0.000325723	0.12686	3.AD/1.YC	GABA_neurons
chr5:64458633-64459458			-7.0514	1.45384	0.00242121	0.22814	3.AD/1.YC	GABA_neurons
chr5:64573906-64574738		ENSG00000186479_RGS7BP,67891	-3.28154	2.02512	0.00205848	0.219985	3.AD/1.YC	GABA_neurons
chr5:66611844-66612621		ENSG00000069020_MAST4,15483	-7.44086	1.78717	0.000410384	0.139758	3.AD/1.YC	GABA_neurons
chr5:67724262-67725156		ENSG00000250421_AC106798.1,177444;ENSG00000249364_AC112206.2,344884	-3.70406	2.32742	0.000553775	0.155468	3.AD/1.YC	GABA_neurons
chr5:69166603-69167505	ENSG00000134057_CCNB1,0	ENSG00000134057_CCNB1,0	-1.21414	5.02485	0.000487811	0.147667	3.AD/1.YC	GABA_neurons
chr5:69369221-69370135	ENSG00000152942_RAD17,0;ENSG00000085231_AK6,0;ENSG00000273841_TAF9,0	ENSG00000085231_AK6,0;ENSG00000273841_TAF9,0;ENSG00000152942_RAD17,0	-1.32832	5.00502	0.000127521	0.0971724	3.AD/1.YC	GABA_neurons
chr5:71455312-71456211	ENSG00000145734_BDP1,0	ENSG00000145734_BDP1,0	-1.05613	4.82599	0.00313871	0.242946	3.AD/1.YC	GABA_neurons
chr5:73213445-73214336	ENSG00000249743_AC116345.1,0	ENSG00000249743_AC116345.1,0	-7.0734	1.36717	0.00269904	0.232554	3.AD/1.YC	GABA_neurons
chr5:75511292-75512160	ENSG00000122008_POLK,0;ENSG00000113163_CERT1,0	ENSG00000113163_CERT1,0;ENSG00000122008_POLK,0	-0.93976	5.57892	0.00306545	0.241187	3.AD/1.YC	GABA_neurons
chr5:75717075-75717960	ENSG00000152359_POC5,0	ENSG00000152359_POC5,0	-1.15645	4.8272	0.00259731	0.230677	3.AD/1.YC	GABA_neurons
chr5:79595011-79595573			-7.06124	1.44267	0.00242858	0.22814	3.AD/1.YC	GABA_neurons
chr5:81971626-81972511	ENSG00000152348_ATG10,0	ENSG00000152348_ATG10,0	-1.09664	5.40615	0.000890886	0.174814	3.AD/1.YC	GABA_neurons
chr5:83077017-83077912	ENSG00000152422_XRCC4,0;ENSG00000174695_TMEM167A,0	ENSG00000174695_TMEM167A,0;ENSG00000152422_XRCC4,0	-1.17682	4.97217	0.000757636	0.167506	3.AD/1.YC	GABA_neurons
chr5:87267512-87268242	ENSG00000145715_RASA1,0	ENSG00000145715_RASA1,0	-1.28869	4.84624	0.000537102	0.153537	3.AD/1.YC	GABA_neurons
chr5:88501861-88502710			1.69901	3.5359	0.00262835	0.231611	3.AD/1.YC	GABA_neurons
chr5:89815855-89816622			-3.20717	2.01857	0.00280945	0.236254	3.AD/1.YC	GABA_neurons
chr5:91379904-91380591	ENSG00000281357_ARRDC3-AS1,0	ENSG00000281357_ARRDC3-AS1,0;ENSG00000113369_ARRDC3,2726	-0.987824	5.133	0.00333157	0.248511	3.AD/1.YC	GABA_neurons
chr5:93581065-93581988	ENSG00000175745_NR2F1,-1234	ENSG00000237187_NR2F1-AS1,3661	-1.31035	4.70865	0.000630873	0.161583	3.AD/1.YC	GABA_neurons
chr5:94111168-94112067	ENSG00000113391_FAM172A,0;ENSG00000286577_AC117528.1,0	ENSG00000113391_FAM172A,0;ENSG00000286577_AC117528.1,0	-1.43889	4.4235	0.000498206	0.14834	3.AD/1.YC	GABA_neurons
chr5:96934591-96935476	ENSG00000113441_LNPEP,0;ENSG00000247121_AC009126.1,333	ENSG00000113441_LNPEP,0;ENSG00000247121_AC009126.1,333	-1.15785	5.15488	0.000842111	0.170867	3.AD/1.YC	GABA_neurons
chr5:96935614-96936372	ENSG00000247121_AC009126.1,0;ENSG00000113441_LNPEP,220	ENSG00000247121_AC009126.1,0;ENSG00000113441_LNPEP,220	-1.04476	5.11316	0.00281846	0.236254	3.AD/1.YC	GABA_neurons
chr5:98928722-98929541	ENSG00000153922_CHD1,0;ENSG00000248489_LINC02062,0	ENSG00000153922_CHD1,0;ENSG00000248489_LINC02062,0	-1.14247	5.56996	0.000329482	0.127918	3.AD/1.YC	GABA_neurons
chr5:102153032-102153932			-7.73612	1.88625	6.72185e-05	0.0749694	3.AD/1.YC	GABA_neurons
chr5:107372882-107373658			-3.31316	2.0591	0.00266872	0.231611	3.AD/1.YC	GABA_neurons
chr5:107425545-107426387		ENSG00000184349_EFNA5,244550	-3.87665	1.7908	0.00307719	0.24153	3.AD/1.YC	GABA_neurons
chr5:108381800-108382593	ENSG00000145743_FBXL17,0;ENSG00000286503_AC008462.1,0	ENSG00000145743_FBXL17,0;ENSG00000286503_AC008462.1,0	-1.06241	5.51804	0.00104903	0.178169	3.AD/1.YC	GABA_neurons
chr5:112389979-112390855		ENSG00000129595_EPB41L4A,28458	-7.54928	1.81082	0.000162293	0.107047	3.AD/1.YC	GABA_neurons
chr5:114948726-114949574			-3.07809	2.39867	0.00205449	0.219942	3.AD/1.YC	GABA_neurons
chr5:115097866-115098737			-2.51824	2.55903	0.00314698	0.243083	3.AD/1.YC	GABA_neurons
chr5:115816244-115817091	ENSG00000129596_CDO1,0	ENSG00000129596_CDO1,0	-1.23432	4.96223	0.000524099	0.152366	3.AD/1.YC	GABA_neurons
chr5:116574405-116575314	ENSG00000249167_SEMA6A-AS2,0;ENSG00000092421_SEMA6A,0	ENSG00000092421_SEMA6A,0;ENSG00000249167_SEMA6A-AS2,0	-1.34121	4.46254	0.000755905	0.167506	3.AD/1.YC	GABA_neurons
chr5:120516526-120517306		ENSG00000184838_PRR16,52226	-7.20894	1.60543	0.0010401	0.177968	3.AD/1.YC	GABA_neurons
chr5:123422993-123423871	ENSG00000168944_CEP120,0	ENSG00000168944_CEP120,0	-1.03835	5.31151	0.00171832	0.207502	3.AD/1.YC	GABA_neurons
chr5:124263742-124264675		ENSG00000253807_LINC01170,173950	-2.23693	2.70247	0.00270733	0.232554	3.AD/1.YC	GABA_neurons
chr5:126594810-126595723	ENSG00000164904_ALDH7A1,0	ENSG00000164904_ALDH7A1,0	-1.26823	4.33441	0.00195311	0.215951	3.AD/1.YC	GABA_neurons
chr5:126776474-126777401	ENSG00000251072_LMNB1-DT,0;ENSG00000113368_LMNB1,0	ENSG00000251072_LMNB1-DT,0;ENSG00000113368_LMNB1,0	-1.14922	5.14646	0.000879242	0.174545	3.AD/1.YC	GABA_neurons
chr5:132013073-132013921	ENSG00000164398_ACSL6,-830;ENSG00000231585_AC034228.2,1625	ENSG00000231585_AC034228.2,1625	-2.54553	3.55795	6.70274e-06	0.0528242	3.AD/1.YC	GABA_neurons
chr5:132136664-132137498			-7.35871	1.71507	0.000616511	0.160928	3.AD/1.YC	GABA_neurons
chr5:132866097-132866998	ENSG00000164405_UQCRQ,0;ENSG00000164404_GDF9,0	ENSG00000164404_GDF9,0;ENSG00000164405_UQCRQ,0	-1.12935	5.53037	0.000537242	0.153537	3.AD/1.YC	GABA_neurons
chr5:132963235-132964149	ENSG00000072364_AFF4,0;ENSG00000272023_AC010240.3,0	ENSG00000072364_AFF4,0;ENSG00000272023_AC010240.3,0	-0.964055	5.48766	0.00244286	0.22858	3.AD/1.YC	GABA_neurons
chr5:133564891-133565759		ENSG00000053108_FSTL4,46782	-7.6689	1.94214	0.000103127	0.0891526	3.AD/1.YC	GABA_neurons
chr5:136750203-136751114		ENSG00000250284_AC109439.2,15373	-8.07877	2.19319	1.70929e-05	0.0528242	3.AD/1.YC	GABA_neurons
chr5:138463678-138464411	ENSG00000120738_EGR1,-1068		-1.49671	4.76108	7.32282e-05	0.0802137	3.AD/1.YC	GABA_neurons
chr5:139341453-139342246	ENSG00000120727_PAIP2,0	ENSG00000120727_PAIP2,0	-0.992659	5.26616	0.00290463	0.23761	3.AD/1.YC	GABA_neurons
chr5:140157005-140157928	ENSG00000254363_AC011379.2,0	ENSG00000254363_AC011379.2,0	-1.18202	4.57847	0.00225993	0.224427	3.AD/1.YC	GABA_neurons
chr5:140401011-140401918	ENSG00000249637_AC008438.1,0;ENSG00000131503_ANKHD1,0	ENSG00000249637_AC008438.1,0;ENSG00000131503_ANKHD1,0	-1.18399	6.10243	0.000121396	0.0967099	3.AD/1.YC	GABA_neurons
chr5:140564072-140564982	ENSG00000113108_APBB3,0;ENSG00000176087_SLC35A4,0	ENSG00000113108_APBB3,0;ENSG00000176087_SLC35A4,0	-1.16887	5.58058	0.000285667	0.122114	3.AD/1.YC	GABA_neurons
chr5:140632404-140633189	ENSG00000170458_CD14,512	ENSG00000170458_CD14,512	-1.78257	3.25375	0.00328145	0.247069	3.AD/1.YC	GABA_neurons
chr5:141513647-141514507			-1.09075	4.87667	0.00235601	0.226627	3.AD/1.YC	GABA_neurons
chr5:141560487-141561406		ENSG00000246422_AC008781.2,2176;ENSG00000131504_DIAPH1,57649	-1.71789	4.02375	0.000214316	0.114817	3.AD/1.YC	GABA_neurons
chr5:141563885-141564806		ENSG00000246422_AC008781.2,5574;ENSG00000131504_DIAPH1,54249	-1.71322	3.6971	0.00118576	0.183552	3.AD/1.YC	GABA_neurons
chr5:141879911-141880633	ENSG00000156453_PCDH1,-665		-1.4959	3.76762	0.00280857	0.236254	3.AD/1.YC	GABA_neurons
chr5:142769833-142770729	ENSG00000145819_ARHGAP26,0	ENSG00000145819_ARHGAP26,0	-1.05065	5.67521	0.00128449	0.18738	3.AD/1.YC	GABA_neurons
chr5:146878173-146878996		ENSG00000156475_PPP2R2B,205788	-1.21594	4.51244	0.00226161	0.224427	3.AD/1.YC	GABA_neurons
chr5:147782317-147783189	ENSG00000176049_JAKMIP2,0	ENSG00000176049_JAKMIP2,0	-1.11593	5.05121	0.00145108	0.195338	3.AD/1.YC	GABA_neurons
chr5:149203825-149204710		ENSG00000173210_ABLIM3,62342;ENSG00000248647_AC012613.1,72066	-3.29729	2.07033	0.00293171	0.238353	3.AD/1.YC	GABA_neurons
chr5:149551092-149552016	ENSG00000113712_CSNK1A1,0;ENSG00000183111_ARHGEF37,0	ENSG00000113712_CSNK1A1,0;ENSG00000183111_ARHGEF37,0	-1.08568	5.27342	0.00146875	0.196096	3.AD/1.YC	GABA_neurons
chr5:149960285-149961175	ENSG00000155850_SLC26A2,0	ENSG00000155850_SLC26A2,0	-1.09881	5.53324	0.000535348	0.153537	3.AD/1.YC	GABA_neurons
chr5:150758371-150759257	ENSG00000132912_DCTN4,0	ENSG00000132912_DCTN4,0	-0.937099	5.88628	0.00225381	0.224255	3.AD/1.YC	GABA_neurons
chr5:151771274-151772180	ENSG00000275765_AC091982.3,0;ENSG00000145907_G3BP1,229;ENSG00000177556_ATOX1,352	ENSG00000275765_AC091982.3,0;ENSG00000145907_G3BP1,229;ENSG00000177556_ATOX1,352	-0.860564	6.40129	0.00324151	0.245785	3.AD/1.YC	GABA_neurons
chr5:152638879-152639728		ENSG00000286749_AC008571.2,263881;ENSG00000249484_LINC01470,583815	-2.79284	2.4664	0.00193586	0.215676	3.AD/1.YC	GABA_neurons
chr5:154272768-154273616		ENSG00000164574_GALNT10,82038	3.02057	2.3693	0.000850976	0.171712	3.AD/1.YC	GABA_neurons
chr5:154858107-154858762	ENSG00000170271_FAXDC2,490;ENSG00000155508_CNOT8,554	ENSG00000170271_FAXDC2,490;ENSG00000155508_CNOT8,554	-1.17307	5.14168	0.000923073	0.175719	3.AD/1.YC	GABA_neurons
chr5:157731179-157732083	ENSG00000113272_THG1L,0	ENSG00000113272_THG1L,0	-0.933075	5.69391	0.00287008	0.236386	3.AD/1.YC	GABA_neurons
chr5:160119163-160120049	ENSG00000170234_PWWP2A,0	ENSG00000170234_PWWP2A,0	-1.11218	6.13647	0.000318996	0.126653	3.AD/1.YC	GABA_neurons
chr5:160433718-160434630			-2.02685	3.13828	0.00177515	0.21012	3.AD/1.YC	GABA_neurons
chr5:163459804-163460726	ENSG00000170584_NUDCD2,0;ENSG00000072571_HMMR,0	ENSG00000170584_NUDCD2,0;ENSG00000072571_HMMR,0	-1.10441	5.47748	0.000763192	0.167506	3.AD/1.YC	GABA_neurons
chr5:163612360-163613254	ENSG00000285590_AC010291.1,0	ENSG00000285590_AC010291.1,0	-2.23433	3.18547	0.000697938	0.165837	3.AD/1.YC	GABA_neurons
chr5:167549859-167550615		ENSG00000145934_TENM2,265060	-6.99506	1.52047	0.00302084	0.240414	3.AD/1.YC	GABA_neurons
chr5:172509043-172509918		ENSG00000287814_AC011407.1,29769	-3.83706	1.79093	0.00328925	0.247266	3.AD/1.YC	GABA_neurons
chr5:173887701-173888554	ENSG00000113742_CPEB4,0	ENSG00000113742_CPEB4,0	-1.3331	5.89479	1.30344e-05	0.0528242	3.AD/1.YC	GABA_neurons
chr5:173972892-173973785	ENSG00000185056_C5orf47,0	ENSG00000185056_C5orf47,0	-1.64181	3.79472	0.000990161	0.176149	3.AD/1.YC	GABA_neurons
chr5:174045201-174046097	ENSG00000170091_NSG2,0	ENSG00000170091_NSG2,0	-1.26309	4.36805	0.00227612	0.224427	3.AD/1.YC	GABA_neurons
chr5:177516638-177517568	ENSG00000183258_DDX41,0	ENSG00000183258_DDX41,0	-1.00786	5.32488	0.00209839	0.22041	3.AD/1.YC	GABA_neurons
chr5:178153561-178154479	ENSG00000145912_NHP2,0	ENSG00000145912_NHP2,0	-1.10633	5.15979	0.0010446	0.178169	3.AD/1.YC	GABA_neurons
chr5:179623393-179624251		ENSG00000169045_HNRNPH1,10533	-1.42079	5.14678	3.4151e-05	0.0608391	3.AD/1.YC	GABA_neurons
chr5:179732335-179733183	ENSG00000161021_MAML1,0	ENSG00000161021_MAML1,0	-0.926131	5.90159	0.00334478	0.248511	3.AD/1.YC	GABA_neurons
chr5:180313508-180314326		ENSG00000131459_GFPT2,39010	2.1538	3.02256	0.00252288	0.229325	3.AD/1.YC	GABA_neurons
chr5:180860846-180861776	ENSG00000196670_ZFP62,0	ENSG00000196670_ZFP62,0	-1.06927	4.96656	0.00299247	0.240011	3.AD/1.YC	GABA_neurons
chr5:181221916-181222646	ENSG00000146063_TRIM41,0	ENSG00000146063_TRIM41,0	-1.07962	4.74923	0.00327804	0.247029	3.AD/1.YC	GABA_neurons
chr5:181223029-181223932	ENSG00000146063_TRIM41,530	ENSG00000146063_TRIM41,530	-1.06127	5.77658	0.000724363	0.167506	3.AD/1.YC	GABA_neurons
chr5:181243706-181244561	ENSG00000233937_AC008443.1,-1946	ENSG00000204628_RACK1,3535	-1.00854	5.12274	0.00326038	0.246241	3.AD/1.YC	GABA_neurons
chr6:282588-283479			-7.95047	2.12726	4.55247e-05	0.0609519	3.AD/1.YC	GABA_neurons
chr6:1311427-1312332	ENSG00000164379_FOXQ1,0	ENSG00000164379_FOXQ1,0	-2.43944	2.90749	0.00123705	0.185136	3.AD/1.YC	GABA_neurons
chr6:5995903-5996707			-2.96352	2.54635	0.000356012	0.133161	3.AD/1.YC	GABA_neurons
chr6:6007093-6007841	ENSG00000124785_NRN1,0	ENSG00000124785_NRN1,0	-1.90498	3.17744	0.00320333	0.244783	3.AD/1.YC	GABA_neurons
chr6:6364951-6365861		ENSG00000216863_LY86-AS1,256910	-7.23963	1.53279	0.00105277	0.178275	3.AD/1.YC	GABA_neurons
chr6:10694248-10695152	ENSG00000137434_C6orf52,0;ENSG00000111845_PAK1IP1,0	ENSG00000137434_C6orf52,0;ENSG00000111845_PAK1IP1,0	-1.05258	4.9958	0.00304097	0.240414	3.AD/1.YC	GABA_neurons
chr6:11318021-11318900		ENSG00000111859_NEDD9,63448	-2.86502	2.13135	0.00245819	0.228725	3.AD/1.YC	GABA_neurons
chr6:12653232-12654075			-3.94962	1.83962	0.00223465	0.223748	3.AD/1.YC	GABA_neurons
chr6:12720075-12720894		ENSG00000112137_PHACTR1,3270	-2.99239	2.31198	0.00232846	0.22566	3.AD/1.YC	GABA_neurons
chr6:14710915-14711802		ENSG00000234261_AL138720.1,378368	-2.34965	2.60882	0.00283561	0.236386	3.AD/1.YC	GABA_neurons
chr6:14799663-14800578		ENSG00000234261_AL138720.1,289592	-2.97542	2.19075	0.00217313	0.221293	3.AD/1.YC	GABA_neurons
chr6:15245260-15246059	ENSG00000271888_AL136162.1,-260;ENSG00000008083_JARID2,-10		-0.961642	5.67477	0.00249052	0.229325	3.AD/1.YC	GABA_neurons
chr6:16319906-16320776		ENSG00000124788_ATXN1,440715	-1.30426	4.20258	0.00289188	0.237478	3.AD/1.YC	GABA_neurons
chr6:21593286-21594114	ENSG00000124766_SOX4,0;ENSG00000283480_AL512380.2,1479	ENSG00000124766_SOX4,0;ENSG00000283480_AL512380.2,1479	-1.50742	4.08989	0.000996636	0.176188	3.AD/1.YC	GABA_neurons
chr6:24720771-24721672	ENSG00000112308_C6orf62,-773;ENSG00000224164_LINC02828,0	ENSG00000224164_LINC02828,0	-1.05567	5.73389	0.000907707	0.175096	3.AD/1.YC	GABA_neurons
chr6:26043334-26044246	ENSG00000287080_HIST1H3C,-1165;ENSG00000276410_HIST1H2BB,0	ENSG00000276410_HIST1H2BB,0	-1.30814	4.90712	0.000306105	0.124897	3.AD/1.YC	GABA_neurons
chr6:26157620-26158511	ENSG00000158373_HIST1H2BD,0;ENSG00000168298_HIST1H1E,1266	ENSG00000158373_HIST1H2BD,0	-1.32344	4.81672	0.000264791	0.120151	3.AD/1.YC	GABA_neurons
chr6:26196803-26197738	ENSG00000277224_HIST1H2BF,-1782;ENSG00000197409_HIST1H3D,0;ENSG00000196866_HIST1H2AD,1505	ENSG00000197409_HIST1H3D,0	-1.15998	4.66542	0.00229311	0.224427	3.AD/1.YC	GABA_neurons
chr6:26204069-26204962	ENSG00000276966_HIST1H4E,0	ENSG00000276966_HIST1H4E,0	-1.47264	4.56622	0.000201687	0.112472	3.AD/1.YC	GABA_neurons
chr6:26216382-26217277	ENSG00000273802_HIST1H2BG,0;ENSG00000277075_HIST1H2AE,0	ENSG00000273802_HIST1H2BG,0;ENSG00000277075_HIST1H2AE,0	-1.23	4.91519	0.000650721	0.162591	3.AD/1.YC	GABA_neurons
chr6:26537984-26538486	ENSG00000182952_HMGN4,0	ENSG00000182952_HMGN4,0	-1.14363	4.5181	0.00331258	0.248046	3.AD/1.YC	GABA_neurons
chr6:27425825-27426718			-3.06324	2.39233	0.00148759	0.197543	3.AD/1.YC	GABA_neurons
chr6:27479314-27480060		ENSG00000286652_AL021918.5,6120	-1.69295	3.89801	0.000601776	0.158782	3.AD/1.YC	GABA_neurons
chr6:27518846-27519721	ENSG00000285703_AL021918.3,0	ENSG00000285703_AL021918.3,0	-1.64426	4.16673	0.000187525	0.110078	3.AD/1.YC	GABA_neurons
chr6:27894187-27894973	ENSG00000197153_HIST1H3J,-1081;ENSG00000278677_HIST1H2AM,-1038;ENSG00000274641_HIST1H2BO,724		-2.25242	3.29489	0.000407197	0.139544	3.AD/1.YC	GABA_neurons
chr6:28080619-28081507	ENSG00000272009_AL121944.1,0;ENSG00000197279_ZNF165,51	ENSG00000272009_AL121944.1,0;ENSG00000197279_ZNF165,51;ENSG00000269293_ZSCAN16-AS1,55786	-1.23984	4.78396	0.000584745	0.156984	3.AD/1.YC	GABA_neurons
chr6:28895527-28895828	ENSG00000224157_HCG14,-702		-2.31078	3.20609	0.000264154	0.120151	3.AD/1.YC	GABA_neurons
chr6:28895943-28896673	ENSG00000224157_HCG14,0	ENSG00000224157_HCG14,0	-1.47046	4.78904	7.97066e-05	0.0814893	3.AD/1.YC	GABA_neurons
chr6:30614600-30615525		ENSG00000204569_PPP1R10,3087	-1.19968	4.68165	0.00152915	0.198941	3.AD/1.YC	GABA_neurons
chr6:30617121-30617897	ENSG00000204568_MRPS18B,0;ENSG00000204569_PPP1R10,715	ENSG00000204568_MRPS18B,0;ENSG00000204569_PPP1R10,715	-1.27506	5.40776	0.000127511	0.0971724	3.AD/1.YC	GABA_neurons
chr6:31546359-31547115	ENSG00000204498_NFKBIL1,0;ENSG00000213760_ATP6V1G2,1312	ENSG00000204498_NFKBIL1,0;ENSG00000213760_ATP6V1G2,1312	-1.35944	4.80808	0.000235476	0.118322	3.AD/1.YC	GABA_neurons
chr6:31652204-31653057	ENSG00000204444_APOM,0;ENSG00000204463_BAG6,0	ENSG00000204463_BAG6,0;ENSG00000204444_APOM,0	-1.05391	5.09447	0.00201423	0.218106	3.AD/1.YC	GABA_neurons
chr6:31827123-31827995	ENSG00000204388_HSPA1B,0	ENSG00000204388_HSPA1B,0	-1.35944	5.68086	2.64954e-05	0.057058	3.AD/1.YC	GABA_neurons
chr6:31862473-31863375	ENSG00000204386_NEU1,0	ENSG00000204386_NEU1,0;ENSG00000204385_SLC44A4,15671	-1.08126	5.37113	0.000965436	0.176149	3.AD/1.YC	GABA_neurons
chr6:32129877-32130805	ENSG00000213676_ATF6B,-1624;ENSG00000204315_FKBPL,0	ENSG00000204315_FKBPL,0	-1.2366	4.75616	0.00079347	0.169968	3.AD/1.YC	GABA_neurons
chr6:32153605-32154484	ENSG00000204314_PRRT1,-522;ENSG00000284954_AL662884.3,0;ENSG00000221988_PPT2,164	ENSG00000284954_AL662884.3,0;ENSG00000221988_PPT2,164	-1.1555	4.731	0.0019746	0.21631	3.AD/1.YC	GABA_neurons
chr6:32175676-32176553	ENSG00000204308_RNF5,-1852;ENSG00000204310_AGPAT1,1543	ENSG00000204310_AGPAT1,1543	-1.26898	5.18255	0.000241089	0.118322	3.AD/1.YC	GABA_neurons
chr6:32971601-32972508	ENSG00000263756_AL645941.3,345;ENSG00000223837_AL645941.1,1369	ENSG00000263756_AL645941.3,345;ENSG00000204256_BRD2,3007	-1.19294	5.846	0.000229403	0.118322	3.AD/1.YC	GABA_neurons
chr6:33200176-33201050	ENSG00000112473_SLC39A7,0;ENSG00000204231_RXRB,0	ENSG00000204231_RXRB,0;ENSG00000112473_SLC39A7,0	-1.05848	5.14635	0.00202209	0.218339	3.AD/1.YC	GABA_neurons
chr6:33248951-33249866	ENSG00000232940_HCG25,0	ENSG00000232940_HCG25,0	-0.962804	5.56795	0.00272236	0.23307	3.AD/1.YC	GABA_neurons
chr6:33271527-33272397	ENSG00000223501_VPS52,0;ENSG00000231500_RPS18,0	ENSG00000223501_VPS52,0;ENSG00000231500_RPS18,0	-1.35996	5.07991	8.20602e-05	0.0825203	3.AD/1.YC	GABA_neurons
chr6:33322683-33323594	ENSG00000204209_DAXX,0	ENSG00000204209_DAXX,0	-0.985224	5.52083	0.00269706	0.232554	3.AD/1.YC	GABA_neurons
chr6:33391168-33392092	ENSG00000237649_KIFC1,0	ENSG00000237649_KIFC1,0	-0.959527	5.5029	0.00316706	0.243821	3.AD/1.YC	GABA_neurons
chr6:34531590-34532471		ENSG00000124507_PACSIN1,65529	-2.31302	3.54391	5.90717e-05	0.073012	3.AD/1.YC	GABA_neurons
chr6:34756977-34757819	ENSG00000124562_SNRPC,0	ENSG00000124562_SNRPC,0	-1.20762	4.30359	0.00328462	0.247069	3.AD/1.YC	GABA_neurons
chr6:35342089-35342972	ENSG00000112033_PPARD,0	ENSG00000112033_PPARD,0	-0.985091	5.30239	0.00314663	0.243083	3.AD/1.YC	GABA_neurons
chr6:36027322-36028162	ENSG00000112062_MAPK14,0	ENSG00000112062_MAPK14,0	-1.05663	5.41395	0.00102325	0.177121	3.AD/1.YC	GABA_neurons
chr6:36422960-36423865		ENSG00000179165_PXT1,18989	-1.37057	4.7549	0.000237477	0.118322	3.AD/1.YC	GABA_neurons
chr6:37818979-37819877	ENSG00000225945_AL121574.1,0;ENSG00000156639_ZFAND3,0	ENSG00000225945_AL121574.1,0;ENSG00000156639_ZFAND3,0	-0.962363	5.65435	0.00219129	0.222348	3.AD/1.YC	GABA_neurons
chr6:38639440-38640348	ENSG00000183826_BTBD9,0	ENSG00000183826_BTBD9,0	-1.04633	5.02968	0.00255765	0.229325	3.AD/1.YC	GABA_neurons
chr6:41779571-41780467	ENSG00000278224_PRICKLE4,-295	ENSG00000137218_FRS3,6075	-1.10385	5.4661	0.000613405	0.160458	3.AD/1.YC	GABA_neurons
chr6:42879369-42880313	ENSG00000146223_RPL7L1,0	ENSG00000146223_RPL7L1,0	-1.56783	4.50252	8.93994e-05	0.0843683	3.AD/1.YC	GABA_neurons
chr6:42984011-42984922	ENSG00000112640_PPP2R5D,0	ENSG00000112640_PPP2R5D,0	-0.912001	5.81379	0.00307751	0.24153	3.AD/1.YC	GABA_neurons
chr6:43059157-43060025	ENSG00000112651_MRPL2,0	ENSG00000112651_MRPL2,0;ENSG00000137171_KLC4,18380	-0.988595	5.34063	0.00304322	0.240414	3.AD/1.YC	GABA_neurons
chr6:45377587-45378390	ENSG00000196284_SUPT3H,0	ENSG00000196284_SUPT3H,0;ENSG00000124813_RUNX2,49430	-1.52851	5.13844	8.2626e-06	0.0528242	3.AD/1.YC	GABA_neurons
chr6:52407235-52408104		ENSG00000096093_EFHC1,45112;ENSG00000170915_PAQR8,45814	-3.29479	1.96773	0.00300592	0.240414	3.AD/1.YC	GABA_neurons
chr6:53544504-53545388		ENSG00000001084_GCLC,71582	-1.17799	4.85776	0.000949717	0.175719	3.AD/1.YC	GABA_neurons
chr6:61117886-61118783			-7.12499	1.57607	0.00171229	0.207502	3.AD/1.YC	GABA_neurons
chr6:63635540-63636403	ENSG00000118482_PHF3,0	ENSG00000118482_PHF3,0	-1.33154	5.31599	0.000103025	0.0891526	3.AD/1.YC	GABA_neurons
chr6:68634689-68635579	ENSG00000230910_AL391807.1,0;ENSG00000135298_ADGRB3,0	ENSG00000230910_AL391807.1,0;ENSG00000135298_ADGRB3,0	-1.2156	5.6809	0.000118148	0.0959265	3.AD/1.YC	GABA_neurons
chr6:73134318-73135233		ENSG00000229154_KCNQ5-AS1,8281;ENSG00000185760_KCNQ5,512526	-7.90099	2.04314	1.57054e-05	0.0528242	3.AD/1.YC	GABA_neurons
chr6:75243380-75244300		ENSG00000112695_COX7A2,6023	-1.12509	4.59777	0.00295123	0.239402	3.AD/1.YC	GABA_neurons
chr6:77456197-77457021			-4.15612	1.97428	0.00143255	0.195278	3.AD/1.YC	GABA_neurons
chr6:79077938-79078888	ENSG00000146247_PHIP,0;ENSG00000286340_AL356776.2,97	ENSG00000146247_PHIP,0;ENSG00000286340_AL356776.2,97	-1.14773	5.25897	0.000544591	0.154842	3.AD/1.YC	GABA_neurons
chr6:79421711-79422499	ENSG00000231533_AL391840.1,1539	ENSG00000231533_AL391840.1,1539	-2.18829	2.8326	0.00247831	0.229125	3.AD/1.YC	GABA_neurons
chr6:80004042-80004901	ENSG00000112742_TTK,155	ENSG00000112742_TTK,155	-1.20779	4.95221	0.000637326	0.161884	3.AD/1.YC	GABA_neurons
chr6:85678396-85679310	ENSG00000203875_SNHG5,0	ENSG00000203875_SNHG5,0	-1.11907	5.56131	0.000709674	0.167177	3.AD/1.YC	GABA_neurons
chr6:89080210-89081097	ENSG00000271931_AL353135.1,0;ENSG00000146278_PNRC1,0	ENSG00000271931_AL353135.1,0;ENSG00000146278_PNRC1,0	-0.939566	5.74877	0.00330986	0.248046	3.AD/1.YC	GABA_neurons
chr6:89638197-89639116	ENSG00000083099_LYRM2,0	ENSG00000083099_LYRM2,0	-1.10103	4.90865	0.00158208	0.200738	3.AD/1.YC	GABA_neurons
chr6:90218203-90219087		ENSG00000112182_BACH2,77821	-1.28443	4.37344	0.00233183	0.225695	3.AD/1.YC	GABA_neurons
chr6:90714833-90715666			-7.78159	1.98177	3.86306e-05	0.0608391	3.AD/1.YC	GABA_neurons
chr6:93514226-93515114		ENSG00000287683_AL591519.1,97275	-7.27174	1.60794	0.000951527	0.175719	3.AD/1.YC	GABA_neurons
chr6:93876381-93877216			-6.9546	1.49324	0.00311649	0.242405	3.AD/1.YC	GABA_neurons
chr6:96015379-96016303	ENSG00000287578_AL034348.1,0;ENSG00000172461_FUT9,0	ENSG00000287578_AL034348.1,0;ENSG00000172461_FUT9,0	-1.06868	5.13532	0.00197554	0.21631	3.AD/1.YC	GABA_neurons
chr6:98834108-98834952	ENSG00000283010_AL589826.2,-1600;ENSG00000184486_POU3F2,0	ENSG00000184486_POU3F2,0	-1.14846	4.79791	0.00254866	0.229325	3.AD/1.YC	GABA_neurons
chr6:99425005-99425921	ENSG00000132424_PNISR,0;ENSG00000228506_AL513550.1,83	ENSG00000132424_PNISR,0;ENSG00000228506_AL513550.1,83	-1.08357	5.00581	0.00222067	0.223495	3.AD/1.YC	GABA_neurons
chr6:104595312-104596024			-7.88424	2.06157	1.61364e-05	0.0528242	3.AD/1.YC	GABA_neurons
chr6:104941070-104941807	ENSG00000203809_LIN28B-AS1,0	ENSG00000203809_LIN28B-AS1,0;ENSG00000187772_LIN28B,4454	-1.80938	3.30415	0.00188347	0.214551	3.AD/1.YC	GABA_neurons
chr6:107251834-107252738		ENSG00000164494_PDSS2,206826	-3.37576	2.07593	0.00182138	0.211915	3.AD/1.YC	GABA_neurons
chr6:108558039-108558747	ENSG00000118689_FOXO3,-1088;ENSG00000287044_AL139106.1,0	ENSG00000287044_AL139106.1,0	-1.07066	5.46233	0.00124448	0.185136	3.AD/1.YC	GABA_neurons
chr6:108764294-108765190		ENSG00000203801_LINC00222,12640	-4.01596	1.71444	0.00276467	0.235551	3.AD/1.YC	GABA_neurons
chr6:109094518-109095387	ENSG00000080546_SESN1,0;ENSG00000183137_CEP57L1,0	ENSG00000080546_SESN1,0;ENSG00000183137_CEP57L1,0	-1.07681	5.55804	0.00116902	0.183552	3.AD/1.YC	GABA_neurons
chr6:109325094-109325938			-7.42336	1.78685	0.000444503	0.142662	3.AD/1.YC	GABA_neurons
chr6:112297748-112298642		ENSG00000226440_AL365214.2,61655	-6.97945	1.35586	0.0026411	0.231611	3.AD/1.YC	GABA_neurons
chr6:113994670-113995443		ENSG00000196591_HDAC2,15865;ENSG00000228624_HDAC2-AS2,24969	-2.2945	2.73966	0.00227343	0.224427	3.AD/1.YC	GABA_neurons
chr6:116229072-116229970		ENSG00000178425_NT5DC1,128221	-1.22857	4.9953	0.000482618	0.147562	3.AD/1.YC	GABA_neurons
chr6:121143234-121143986		ENSG00000146350_TBC1D32,190759	-7.16143	1.60173	0.00165256	0.204378	3.AD/1.YC	GABA_neurons
chr6:127266524-127267365	ENSG00000118518_RNF146,0	ENSG00000118518_RNF146,0	-1.13016	5.20491	0.000979659	0.176149	3.AD/1.YC	GABA_neurons
chr6:127980823-127981677		ENSG00000152894_PTPRK,538997	-7.89825	1.99676	1.89604e-05	0.0528242	3.AD/1.YC	GABA_neurons
chr6:135901703-135902491		ENSG00000171408_PDE7B,50002	-2.37899	2.65262	0.00308498	0.24153	3.AD/1.YC	GABA_neurons
chr6:136289496-136290357	ENSG00000029363_BCLAF1,0	ENSG00000029363_BCLAF1,0	-1.18301	5.37352	0.000499744	0.14834	3.AD/1.YC	GABA_neurons
chr6:139126022-139126909			-2.55489	2.80478	0.00121115	0.184806	3.AD/1.YC	GABA_neurons
chr6:139375251-139375721	ENSG00000164442_CITED2,-603	ENSG00000226571_AL592429.2,103889	-1.63249	3.7798	0.000996255	0.176188	3.AD/1.YC	GABA_neurons
chr6:148471830-148472751		ENSG00000111961_SASH1,199526	-3.11985	2.38493	0.00151312	0.198754	3.AD/1.YC	GABA_neurons
chr6:148758155-148759072		ENSG00000111962_UST,11125	-2.96214	2.5752	0.00062939	0.16154	3.AD/1.YC	GABA_neurons
chr6:149545664-149546573	ENSG00000131013_PPIL4,0	ENSG00000131013_PPIL4,0	-1.09963	5.10492	0.00129087	0.187641	3.AD/1.YC	GABA_neurons
chr6:151451832-151452750	ENSG00000155906_RMND1,0;ENSG00000146476_ARMT1,0	ENSG00000155906_RMND1,0;ENSG00000146476_ARMT1,0	-0.954446	5.61967	0.00320523	0.244783	3.AD/1.YC	GABA_neurons
chr6:152635923-152636467	ENSG00000131018_SYNE1,1334	ENSG00000131018_SYNE1,1334	-1.65773	3.79632	0.000966063	0.176149	3.AD/1.YC	GABA_neurons
chr6:156686915-156687827			-1.06653	5.25031	0.00143072	0.195278	3.AD/1.YC	GABA_neurons
chr6:159106530-159107359		ENSG00000224478_AL356417.1,12437;ENSG00000285492_AL356417.3,14136	-2.18252	2.87293	0.00332817	0.248511	3.AD/1.YC	GABA_neurons
chr6:159789433-159790025	ENSG00000120438_TCP1,0;ENSG00000112110_MRPL18,0	ENSG00000120438_TCP1,0;ENSG00000112110_MRPL18,0	-1.06601	5.03365	0.00283304	0.236386	3.AD/1.YC	GABA_neurons
chr6:159790132-159790649	ENSG00000120438_TCP1,-429;ENSG00000112110_MRPL18,320	ENSG00000112110_MRPL18,320	-1.27037	4.67247	0.000768715	0.16781	3.AD/1.YC	GABA_neurons
chr6:165703669-165704555		ENSG00000112541_PDE10A,283523	-1.79952	3.32911	0.00316657	0.243821	3.AD/1.YC	GABA_neurons
chr6:165987890-165988635	ENSG00000112541_PDE10A,0;ENSG00000281832_LINC00602,339	ENSG00000112541_PDE10A,0;ENSG00000281832_LINC00602,339	-1.87592	4.0807	4.38396e-05	0.0609519	3.AD/1.YC	GABA_neurons
chr7:2843968-2844873	ENSG00000146535_GNA12,0	ENSG00000146535_GNA12,0	-1.10112	5.88418	0.000586607	0.156984	3.AD/1.YC	GABA_neurons
chr7:5423602-5424520	ENSG00000272953_AC092171.4,-1250;ENSG00000182095_TNRC18,894	ENSG00000182095_TNRC18,894	-1.52398	5.04151	1.33893e-05	0.0528242	3.AD/1.YC	GABA_neurons
chr7:6008743-6009658	ENSG00000122512_PMS2,0;ENSG00000106305_AIMP2,0	ENSG00000122512_PMS2,0;ENSG00000106305_AIMP2,0	-1.0483	5.47341	0.00118545	0.183552	3.AD/1.YC	GABA_neurons
chr7:13990988-13991867	ENSG00000006468_ETV1,0	ENSG00000006468_ETV1,0	-1.24071	4.30767	0.00285513	0.236386	3.AD/1.YC	GABA_neurons
chr7:14092115-14092985			-3.95996	1.8149	0.00211526	0.221293	3.AD/1.YC	GABA_neurons
chr7:21427018-21427621	ENSG00000105866_SP4,-422		-1.05172	5.52072	0.000997323	0.176188	3.AD/1.YC	GABA_neurons
chr7:21767086-21767936		ENSG00000105877_DNAH11,224047	-7.01086	1.35955	0.00264655	0.231611	3.AD/1.YC	GABA_neurons
chr7:26200477-26201253	ENSG00000122565_CBX3,0;ENSG00000122566_HNRNPA2B1,276	ENSG00000122565_CBX3,0;ENSG00000122566_HNRNPA2B1,276	-0.989126	5.43823	0.00252175	0.229325	3.AD/1.YC	GABA_neurons
chr7:28408780-28409687		ENSG00000146592_CREB5,109459	-1.62768	3.79308	0.00155176	0.199992	3.AD/1.YC	GABA_neurons
chr7:28685508-28686386		ENSG00000146592_CREB5,386187	-1.51048	4.03556	0.00110447	0.180237	3.AD/1.YC	GABA_neurons
chr7:29019384-29020149		ENSG00000106066_CPVL,175302	-3.31797	2.10501	0.00190529	0.215371	3.AD/1.YC	GABA_neurons
chr7:29281513-29282432		ENSG00000106069_CHN2,134944;ENSG00000285162_AC004593.3,159173	-3.56608	2.64475	3.63151e-05	0.0608391	3.AD/1.YC	GABA_neurons
chr7:30172907-30173776			-1.23143	4.40409	0.00244495	0.22858	3.AD/1.YC	GABA_neurons
chr7:31340317-31341174	ENSG00000164600_NEUROD6,0	ENSG00000164600_NEUROD6,0	-7.2508	1.65035	0.00101661	0.177121	3.AD/1.YC	GABA_neurons
chr7:31372328-31373050			-7.27104	1.62225	0.000946917	0.175719	3.AD/1.YC	GABA_neurons
chr7:33062427-33063363	ENSG00000122643_NT5C3A,0	ENSG00000122643_NT5C3A,0	-1.25087	5.75736	6.51623e-05	0.0741438	3.AD/1.YC	GABA_neurons
chr7:35185831-35186740			-1.49365	4.55271	0.000177	0.108035	3.AD/1.YC	GABA_neurons
chr7:35780997-35781846		ENSG00000228878_SEPTIN7-AS1,18830	-2.92799	2.19542	0.00214054	0.221293	3.AD/1.YC	GABA_neurons
chr7:37920548-37921363		ENSG00000106483_SFRP4,104332;ENSG00000086289_EPDR1,236705	-1.372	4.32772	0.00104999	0.178169	3.AD/1.YC	GABA_neurons
chr7:38975708-38976640	ENSG00000106536_POU6F2,-1358		-2.54163	2.55967	0.00209261	0.22041	3.AD/1.YC	GABA_neurons
chr7:43481825-43482657		ENSG00000002746_HECW1,369196	-3.15569	2.43712	0.00113146	0.181452	3.AD/1.YC	GABA_neurons
chr7:44606316-44607240	ENSG00000105953_OGDH,0	ENSG00000105953_OGDH,0	-0.981529	6.15578	0.00104926	0.178169	3.AD/1.YC	GABA_neurons
chr7:44847700-44848601	ENSG00000105968_H2AFV,0;ENSG00000234183_LINC01952,0	ENSG00000105968_H2AFV,0;ENSG00000234183_LINC01952,0	-1.19067	6.0421	0.000135037	0.0993997	3.AD/1.YC	GABA_neurons
chr7:45278661-45279473		ENSG00000286738_AC073968.2,9980	-8.655	2.59098	5.54821e-08	0.00680676	3.AD/1.YC	GABA_neurons
chr7:47568337-47569245		ENSG00000136205_TNS3,13313	-2.24517	3.24425	0.000289898	0.122348	3.AD/1.YC	GABA_neurons
chr7:55365604-55366526	ENSG00000132434_LANCL2,156	ENSG00000132434_LANCL2,156	-0.995856	5.76177	0.00229377	0.224427	3.AD/1.YC	GABA_neurons
chr7:57371002-57371859			-6.96483	1.50012	0.00309183	0.241604	3.AD/1.YC	GABA_neurons
chr7:63900314-63901061	ENSG00000236299_AC092634.4,0;ENSG00000226581_LINC02848,1	ENSG00000236299_AC092634.4,0;ENSG00000226581_LINC02848,1	-1.24231	4.4987	0.00162707	0.203485	3.AD/1.YC	GABA_neurons
chr7:64313511-64314407		ENSG00000234444_ZNF736,6052	-1.09846	4.80918	0.00230384	0.224427	3.AD/1.YC	GABA_neurons
chr7:65872666-65873556	ENSG00000196715_VKORC1L1,0	ENSG00000196715_VKORC1L1,0	-0.97534	5.62147	0.00235915	0.226649	3.AD/1.YC	GABA_neurons
chr7:66493213-66494110	ENSG00000179406_LINC00174,0;ENSG00000237310_AC008267.5,0	ENSG00000179406_LINC00174,0;ENSG00000237310_AC008267.5,0	-1.29245	5.5576	6.45091e-05	0.0741438	3.AD/1.YC	GABA_neurons
chr7:73005456-73006365			-1.45497	4.44764	0.000316209	0.126518	3.AD/1.YC	GABA_neurons
chr7:73154376-73155339			-1.80233	3.36119	0.0020954	0.22041	3.AD/1.YC	GABA_neurons
chr7:74586061-74586810		ENSG00000006704_GTF2IRD1,132271	2.44301	2.39107	0.00292547	0.238161	3.AD/1.YC	GABA_neurons
chr7:74657090-74657907		ENSG00000263001_GTF2I,6859	-1.0211	5.36056	0.00230096	0.224427	3.AD/1.YC	GABA_neurons
chr7:77536587-77537463	ENSG00000127947_PTPN12,0	ENSG00000127947_PTPN12,0	-1.1281	5.71238	0.00036496	0.133689	3.AD/1.YC	GABA_neurons
chr7:77798223-77799134	ENSG00000135211_TMEM60,0;ENSG00000006576_PHTF2,0	ENSG00000135211_TMEM60,0;ENSG00000006576_PHTF2,0	-1.15097	6.05361	0.000139065	0.0993997	3.AD/1.YC	GABA_neurons
chr7:81952857-81953746		ENSG00000153956_CACNA2D1,490031	-7.02106	1.41078	0.00253508	0.229325	3.AD/1.YC	GABA_neurons
chr7:92134164-92135019	ENSG00000188693_CYP51A1-AS1,0;ENSG00000001630_CYP51A1,0	ENSG00000001630_CYP51A1,0;ENSG00000188693_CYP51A1-AS1,0	-1.04396	5.31026	0.00168749	0.206983	3.AD/1.YC	GABA_neurons
chr7:98106442-98107309	ENSG00000164715_LMTK2,0	ENSG00000164715_LMTK2,0	-1.24125	4.97674	0.00036175	0.133689	3.AD/1.YC	GABA_neurons
chr7:98194799-98195699		ENSG00000164715_LMTK2,87937	1.99029	3.25697	0.00157353	0.200738	3.AD/1.YC	GABA_neurons
chr7:98826385-98827208			-2.04894	3.2108	0.000895022	0.174849	3.AD/1.YC	GABA_neurons
chr7:99120230-99121075		ENSG00000198742_SMURF1,23025	-2.69765	2.39534	0.00306477	0.241187	3.AD/1.YC	GABA_neurons
chr7:100081366-100082266	ENSG00000166526_ZNF3,282	ENSG00000166526_ZNF3,282	-1.06354	5.10741	0.00190243	0.215371	3.AD/1.YC	GABA_neurons
chr7:100335614-100336538			-1.09461	4.92539	0.00183435	0.213111	3.AD/1.YC	GABA_neurons
chr7:100436084-100436908	ENSG00000240211_AC092849.1,0;ENSG00000160813_PPP1R35,0;ENSG00000241357_AC092849.2,827	ENSG00000160813_PPP1R35,0;ENSG00000240211_AC092849.1,0;ENSG00000241357_AC092849.2,827	-1.1447	5.04614	0.00112629	0.181336	3.AD/1.YC	GABA_neurons
chr7:100971291-100972065	ENSG00000205277_MUC12,1668	ENSG00000205277_MUC12,1668	2.47398	2.60367	0.00234825	0.226375	3.AD/1.YC	GABA_neurons
chr7:101165172-101166082	ENSG00000128564_VGF,0	ENSG00000128564_VGF,0	-1.39817	4.74226	0.000186068	0.109905	3.AD/1.YC	GABA_neurons
chr7:102512351-102513235		ENSG00000170667_RASA4B,4546	1.24831	4.48918	0.0033277	0.248511	3.AD/1.YC	GABA_neurons
chr7:102748393-102749295	ENSG00000286830_AC105052.5,0;ENSG00000222011_FAM185A,0	ENSG00000286830_AC105052.5,0;ENSG00000222011_FAM185A,0	-1.1925	5.06309	0.000935035	0.175719	3.AD/1.YC	GABA_neurons
chr7:105013508-105014432	ENSG00000228393_LINC01004,-464;ENSG00000005483_KMT2E,0;ENSG00000239569_KMT2E-AS1,0	ENSG00000239569_KMT2E-AS1,0;ENSG00000005483_KMT2E,0	-1.03977	5.60518	0.000929247	0.175719	3.AD/1.YC	GABA_neurons
chr7:112450086-112450810		ENSG00000006652_IFRD1,27118	-1.06807	5.69749	0.00079274	0.169968	3.AD/1.YC	GABA_neurons
chr7:114082871-114083812			-4.06701	1.88113	0.00132541	0.189518	3.AD/1.YC	GABA_neurons
chr7:123557441-123558371	ENSG00000128609_NDUFA5,0	ENSG00000128609_NDUFA5,0	-1.306	4.96471	0.000236256	0.118322	3.AD/1.YC	GABA_neurons
chr7:124929513-124930393	ENSG00000224897_POT1-AS1,0;ENSG00000128513_POT1,0	ENSG00000128513_POT1,0;ENSG00000224897_POT1-AS1,0	-1.03981	5.00428	0.00267133	0.231611	3.AD/1.YC	GABA_neurons
chr7:130069975-130070872	ENSG00000128607_KLHDC10,0	ENSG00000128607_KLHDC10,0	-1.19478	5.14526	0.000424323	0.140317	3.AD/1.YC	GABA_neurons
chr7:135509658-135510565	ENSG00000080802_CNOT4,0	ENSG00000080802_CNOT4,0	-0.978904	5.34441	0.00292859	0.238257	3.AD/1.YC	GABA_neurons
chr7:137454141-137454914		ENSG00000157680_DGKI,392178	-2.57251	2.7399	0.000666292	0.162591	3.AD/1.YC	GABA_neurons
chr7:138001766-138002602	ENSG00000182158_CREB3L2,0;ENSG00000122787_AKR1D1,0	ENSG00000182158_CREB3L2,0;ENSG00000122787_AKR1D1,0	-0.94508	5.68386	0.00254902	0.229325	3.AD/1.YC	GABA_neurons
chr7:139340035-139340906	ENSG00000146963_LUC7L2,0;ENSG00000164898_FMC1,578	ENSG00000146963_LUC7L2,0;ENSG00000164898_FMC1,578	-1.5053	5.15126	1.06578e-05	0.0528242	3.AD/1.YC	GABA_neurons
chr7:139359356-139360117	ENSG00000273391_AC083880.1,0	ENSG00000273391_AC083880.1,0;ENSG00000146963_LUC7L2,18997	-0.98287	5.6781	0.00206218	0.220161	3.AD/1.YC	GABA_neurons
chr7:142620304-142621171	ENSG00000211746_TRBV19,1455		-3.46587	2.20677	0.0012116	0.184806	3.AD/1.YC	GABA_neurons
chr7:143013329-143014284			-3.12299	2.42331	0.00126113	0.186154	3.AD/1.YC	GABA_neurons
chr7:148987024-148987955	ENSG00000281189_GHET1,0	ENSG00000281189_GHET1,0	-1.37875	4.62421	0.000309515	0.125322	3.AD/1.YC	GABA_neurons
chr7:150787518-150788421			2.23026	3.06524	0.0014018	0.19367	3.AD/1.YC	GABA_neurons
chr7:151232011-151232895	ENSG00000033100_CHPF2,0	ENSG00000033100_CHPF2,0	-1.11606	4.79268	0.00245905	0.228725	3.AD/1.YC	GABA_neurons
chr7:151538916-151539776			-1.54444	3.876	0.00158386	0.200738	3.AD/1.YC	GABA_neurons
chr7:151875713-151876470	ENSG00000239911_PRKAG2-AS1,-572;ENSG00000106617_PRKAG2,655	ENSG00000106617_PRKAG2,655	-1.35779	4.07544	0.002847	0.236386	3.AD/1.YC	GABA_neurons
chr7:152436237-152437010	ENSG00000055609_KMT2C,-232		-1.02534	5.09766	0.00281151	0.236254	3.AD/1.YC	GABA_neurons
chr7:152463519-152464383	ENSG00000261455_LINC01003,0	ENSG00000261455_LINC01003,0	-1.03044	5.7127	0.00133885	0.190015	3.AD/1.YC	GABA_neurons
chr7:157138466-157139278	ENSG00000009335_UBE3C,0	ENSG00000009335_UBE3C,0	-1.01646	5.18553	0.0030236	0.240414	3.AD/1.YC	GABA_neurons
chr7:158414229-158415074		ENSG00000155093_PTPRN2,172749	-1.53974	3.97861	0.00114916	0.182649	3.AD/1.YC	GABA_neurons
chr7:158856096-158857003	ENSG00000126870_WDR60,0	ENSG00000126870_WDR60,0	-1.12637	5.33955	0.000665274	0.162591	3.AD/1.YC	GABA_neurons
chr8:1252634-1253569		ENSG00000198010_DLGAP2,515038	-1.44959	3.87425	0.00314108	0.242976	3.AD/1.YC	GABA_neurons
chr8:6707968-6708906	ENSG00000249898_MCPH1-AS1,0;ENSG00000155189_AGPAT5,0	ENSG00000249898_MCPH1-AS1,0;ENSG00000155189_AGPAT5,0	-1.21422	5.23875	0.000294806	0.12302	3.AD/1.YC	GABA_neurons
chr8:12755129-12756015	ENSG00000154359_LONRF1,58	ENSG00000154359_LONRF1,58	-1.02044	5.27329	0.00214856	0.221293	3.AD/1.YC	GABA_neurons
chr8:15129628-15130558		ENSG00000185053_SGCZ,107873	-2.19085	2.79601	0.00204148	0.21942	3.AD/1.YC	GABA_neurons
chr8:18137451-18138295			-6.99107	1.44533	0.00256388	0.229411	3.AD/1.YC	GABA_neurons
chr8:22672894-22673723			-2.51397	3.30489	4.08125e-05	0.0608391	3.AD/1.YC	GABA_neurons
chr8:23518744-23519576			-3.39063	2.12891	0.00170101	0.207502	3.AD/1.YC	GABA_neurons
chr8:25458272-25459126	ENSG00000184661_CDCA2,-73;ENSG00000104756_KCTD9,0	ENSG00000104756_KCTD9,0	-1.1682	5.96971	0.000174909	0.108035	3.AD/1.YC	GABA_neurons
chr8:26133637-26134474			-1.90239	3.35468	0.00146586	0.196096	3.AD/1.YC	GABA_neurons
chr8:27258113-27258964	ENSG00000015592_STMN4,0	ENSG00000015592_STMN4,0	-1.32082	4.66204	0.000436094	0.142311	3.AD/1.YC	GABA_neurons
chr8:28489981-28490824	ENSG00000214050_FBXO16,0	ENSG00000214050_FBXO16,0	-1.25658	4.6585	0.000892504	0.174814	3.AD/1.YC	GABA_neurons
chr8:29687580-29688476		ENSG00000251191_LINC00589,59633	-7.42944	1.75478	0.000393001	0.137757	3.AD/1.YC	GABA_neurons
chr8:30155963-30156846	ENSG00000271869_AC026979.2,0;ENSG00000104671_DCTN6,0	ENSG00000271869_AC026979.2,0;ENSG00000104671_DCTN6,0;ENSG00000104660_LEPROTL1,60555	-1.02194	5.18616	0.00229763	0.224427	3.AD/1.YC	GABA_neurons
chr8:30807384-30808296		ENSG00000104695_PPP2CB,6018	-1.98412	3.12037	0.00308056	0.24153	3.AD/1.YC	GABA_neurons
chr8:35338148-35339074		ENSG00000156687_UNC5D,102673	-7.32911	1.66639	0.000620706	0.160995	3.AD/1.YC	GABA_neurons
chr8:37849455-37850359	ENSG00000104221_BRF2,0	ENSG00000104221_BRF2,0	-1.38546	4.56874	0.000622667	0.161163	3.AD/1.YC	GABA_neurons
chr8:38384716-38385462	ENSG00000165046_LETM2,-745		-1.53884	3.92723	0.00164526	0.204378	3.AD/1.YC	GABA_neurons
chr8:38996265-38997168	ENSG00000169490_TM2D2,0;ENSG00000168615_ADAM9,0	ENSG00000169490_TM2D2,0;ENSG00000168615_ADAM9,0	-1.0566	6.26426	0.000364683	0.133689	3.AD/1.YC	GABA_neurons
chr8:42005117-42006040		ENSG00000083168_KAT6A,45954	-2.03641	3.51066	0.000289688	0.122348	3.AD/1.YC	GABA_neurons
chr8:42147551-42148377			-7.52397	1.88109	0.000239404	0.118322	3.AD/1.YC	GABA_neurons
chr8:56074110-56075036	ENSG00000008988_RPS20,0;ENSG00000253603_CERNA3,0	ENSG00000008988_RPS20,0;ENSG00000253603_CERNA3,0	-1.01312	5.34663	0.00296229	0.239569	3.AD/1.YC	GABA_neurons
chr8:60981141-60981974			1.96338	3.16081	0.00302091	0.240414	3.AD/1.YC	GABA_neurons
chr8:63168092-63168976	ENSG00000270673_YTHDF3-AS1,0;ENSG00000185728_YTHDF3,0	ENSG00000270673_YTHDF3-AS1,0;ENSG00000185728_YTHDF3,0	-0.95576	5.53603	0.00334632	0.248511	3.AD/1.YC	GABA_neurons
chr8:63220039-63220866			-4.30726	1.99997	0.000782352	0.169506	3.AD/1.YC	GABA_neurons
chr8:63602394-63603281			-2.37355	2.95199	0.000736863	0.167506	3.AD/1.YC	GABA_neurons
chr8:64822252-64823177		ENSG00000287998_AC104232.3,23448	-4.12656	1.97344	0.000898877	0.175044	3.AD/1.YC	GABA_neurons
chr8:66113781-66114435	ENSG00000253190_AC084082.1,1114	ENSG00000253190_AC084082.1,1114	-1.36145	4.70111	0.000481074	0.14755	3.AD/1.YC	GABA_neurons
chr8:66428368-66429284	ENSG00000246145_RRS1-AS1,0;ENSG00000179041_RRS1,0	ENSG00000246145_RRS1-AS1,0;ENSG00000179041_RRS1,0;ENSG00000287127_AC009879.4,3086	-0.981205	5.68484	0.00177288	0.21012	3.AD/1.YC	GABA_neurons
chr8:66612936-66613842	ENSG00000185697_MYBL1,405	ENSG00000185697_MYBL1,405	-1.15207	5.53122	0.000762342	0.167506	3.AD/1.YC	GABA_neurons
chr8:73971868-73972791	ENSG00000154582_ELOC,0;ENSG00000175606_TMEM70,0	ENSG00000154582_ELOC,0;ENSG00000175606_TMEM70,0	-1.04909	5.67412	0.00112437	0.181336	3.AD/1.YC	GABA_neurons
chr8:81111539-81112426	ENSG00000076641_PAG1,0	ENSG00000076641_PAG1,0	-1.18645	5.24982	0.000372858	0.135395	3.AD/1.YC	GABA_neurons
chr8:84587968-84588898		ENSG00000184672_RALYL,405181	-3.57204	2.27145	0.00084008	0.170867	3.AD/1.YC	GABA_neurons
chr8:85220043-85220984	ENSG00000176731_RBIS,0;ENSG00000185015_CA13,0	ENSG00000176731_RBIS,0;ENSG00000185015_CA13,0	-0.978014	5.48678	0.00303197	0.240414	3.AD/1.YC	GABA_neurons
chr8:88542331-88543072		ENSG00000253553_AC090578.1,215495	-7.47959	1.80352	0.000267211	0.120151	3.AD/1.YC	GABA_neurons
chr8:92965457-92966322		ENSG00000205133_TRIQK,51351;ENSG00000253197_AC117834.1,82473	-0.962113	5.83893	0.00193488	0.215676	3.AD/1.YC	GABA_neurons
chr8:94553132-94554049	ENSG00000164944_VIRMA,0;ENSG00000253704_AC023632.2,0	ENSG00000164944_VIRMA,0;ENSG00000253704_AC023632.2,0	-1.16183	4.94294	0.000975311	0.176149	3.AD/1.YC	GABA_neurons
chr8:94822812-94823720		ENSG00000164941_INTS8,9501	-0.994543	5.49451	0.0018655	0.213801	3.AD/1.YC	GABA_neurons
chr8:95109969-95110655		ENSG00000156170_NDUFAF6,214202	-7.10985	1.48108	0.00161611	0.203147	3.AD/1.YC	GABA_neurons
chr8:97553237-97554121			-2.06048	3.05362	0.0028811	0.236906	3.AD/1.YC	GABA_neurons
chr8:102651514-102652360		ENSG00000155090_KLF10,3365	-2.52353	2.56647	0.00278288	0.23611	3.AD/1.YC	GABA_neurons
chr8:103105152-103105666			-2.0333	3.2519	0.00122127	0.184806	3.AD/1.YC	GABA_neurons
chr8:104417713-104418598		ENSG00000147647_DPYS,48457	-1.44285	3.99958	0.00179451	0.210878	3.AD/1.YC	GABA_neurons
chr8:109333792-109334707	ENSG00000120526_NUDCD1,0;ENSG00000120533_ENY2,0	ENSG00000120526_NUDCD1,0;ENSG00000120533_ENY2,0	-1.05492	5.63881	0.000802674	0.169968	3.AD/1.YC	GABA_neurons
chr8:109962413-109963314			-7.23671	1.59611	0.000990699	0.176149	3.AD/1.YC	GABA_neurons
chr8:116874207-116875044	ENSG00000253327_RAD21-AS1,0;ENSG00000164754_RAD21,0	ENSG00000164754_RAD21,0;ENSG00000253327_RAD21-AS1,0	-1.13332	4.666	0.00217171	0.221293	3.AD/1.YC	GABA_neurons
chr8:118111456-118112364	ENSG00000182197_EXT1,0	ENSG00000182197_EXT1,0	-0.993571	5.59632	0.00227688	0.224427	3.AD/1.YC	GABA_neurons
chr8:119873371-119874202	ENSG00000155792_DEPTOR,0;ENSG00000245330_AP005717.1,286	ENSG00000155792_DEPTOR,0;ENSG00000245330_AP005717.1,286	-0.997523	5.70701	0.00167539	0.206162	3.AD/1.YC	GABA_neurons
chr8:124728152-124729055	ENSG00000170873_MTSS1,0	ENSG00000170873_MTSS1,0	-1.06655	5.24033	0.00260758	0.230981	3.AD/1.YC	GABA_neurons
chr8:132142858-132143719		ENSG00000184156_KCNQ3,337376	-1.65781	3.75694	0.00122242	0.184806	3.AD/1.YC	GABA_neurons
chr8:135442632-135443559			-2.70157	2.64695	0.000937358	0.175719	3.AD/1.YC	GABA_neurons
chr8:140457503-140458352	ENSG00000167632_TRAPPC9,227	ENSG00000167632_TRAPPC9,227	-0.951732	5.42005	0.00321468	0.244962	3.AD/1.YC	GABA_neurons
chr8:142614135-142615025	ENSG00000198576_ARC,0	ENSG00000198576_ARC,0	-1.04249	5.08974	0.00216419	0.221293	3.AD/1.YC	GABA_neurons
chr8:142816041-142816891			-1.73805	3.78837	0.000587327	0.156984	3.AD/1.YC	GABA_neurons
chr8:143266888-143267807	ENSG00000250571_GLI4,0	ENSG00000250571_GLI4,0	-0.993008	5.45642	0.00220331	0.222348	3.AD/1.YC	GABA_neurons
chr9:2559259-2560187		ENSG00000236404_VLDLR-AS1,83172	-2.32179	2.77893	0.00244633	0.22858	3.AD/1.YC	GABA_neurons
chr9:2843707-2844625	ENSG00000080608_PUM3,0	ENSG00000080608_PUM3,0	-1.07552	5.0045	0.00187324	0.213801	3.AD/1.YC	GABA_neurons
chr9:3525844-3526594	ENSG00000232104_RFX3-AS1,-129;ENSG00000080298_RFX3,0	ENSG00000080298_RFX3,0	-1.11308	5.31427	0.000732375	0.167506	3.AD/1.YC	GABA_neurons
chr9:4984546-4985502	ENSG00000096968_JAK2,156	ENSG00000096968_JAK2,156	-1.05712	5.50078	0.00098156	0.176149	3.AD/1.YC	GABA_neurons
chr9:6412668-6413576	ENSG00000147854_UHRF2,0	ENSG00000147854_UHRF2,0	-1.01305	5.2754	0.00244617	0.22858	3.AD/1.YC	GABA_neurons
chr9:6680992-6681913			-1.01092	5.39056	0.00199377	0.216672	3.AD/1.YC	GABA_neurons
chr9:15552499-15553388	ENSG00000164989_CCDC171,0	ENSG00000164989_CCDC171,0	-1.11912	5.36226	0.000664992	0.162591	3.AD/1.YC	GABA_neurons
chr9:19379814-19380716	ENSG00000137154_RPS6,0	ENSG00000137154_RPS6,0	-1.00853	5.04997	0.00324468	0.245874	3.AD/1.YC	GABA_neurons
chr9:20622104-20622874	ENSG00000171843_MLLT3,0	ENSG00000171843_MLLT3,0	-1.39289	4.90589	9.33888e-05	0.0874604	3.AD/1.YC	GABA_neurons
chr9:21789242-21790125			-3.23124	1.99427	0.00286765	0.236386	3.AD/1.YC	GABA_neurons
chr9:23552948-23553863		ENSG00000283982_AL445623.2,118524	-2.37895	3.1626	0.000494226	0.148249	3.AD/1.YC	GABA_neurons
chr9:26946797-26947739	ENSG00000096872_IFT74,0;ENSG00000137055_PLAA,0	ENSG00000137055_PLAA,0;ENSG00000096872_IFT74,0	-1.11705	5.05183	0.00115871	0.183552	3.AD/1.YC	GABA_neurons
chr9:27573126-27574053	ENSG00000147894_C9orf72,0	ENSG00000147894_C9orf72,0	-0.971682	5.43047	0.00284343	0.236386	3.AD/1.YC	GABA_neurons
chr9:27663874-27664716			-4.00029	1.88118	0.00144138	0.195338	3.AD/1.YC	GABA_neurons
chr9:32550495-32551369	ENSG00000235453_SMIM27,0;ENSG00000197579_TOPORS,1217	ENSG00000235453_SMIM27,0;ENSG00000197579_TOPORS,1217	-1.37723	4.88381	0.000109341	0.0916328	3.AD/1.YC	GABA_neurons
chr9:32552030-32552906	ENSG00000197579_TOPORS,0;ENSG00000235453_SMIM27,886	ENSG00000197579_TOPORS,0;ENSG00000235453_SMIM27,886	-1.04381	5.12779	0.0024652	0.228725	3.AD/1.YC	GABA_neurons
chr9:32865932-32866791			-3.21169	2.06957	0.0033702	0.249228	3.AD/1.YC	GABA_neurons
chr9:35657707-35658572	ENSG00000269900_RMRP,0;ENSG00000159884_CCDC107,0	ENSG00000269900_RMRP,0;ENSG00000159884_CCDC107,0	-0.952875	5.82346	0.00271064	0.232554	3.AD/1.YC	GABA_neurons
chr9:37465224-37466103	ENSG00000168795_ZBTB5,0	ENSG00000168795_ZBTB5,0	-0.924244	5.77648	0.00302883	0.240414	3.AD/1.YC	GABA_neurons
chr9:41273612-41274508	ENSG00000275450_AL845472.1,-1772		-1.47106	4.35515	0.000390811	0.137757	3.AD/1.YC	GABA_neurons
chr9:41358546-41359394			-1.61314	3.59407	0.00267105	0.231611	3.AD/1.YC	GABA_neurons
chr9:62897432-62898344	ENSG00000234665_LERFS,0;ENSG00000170161_AL512625.1,64	ENSG00000234665_LERFS,0;ENSG00000170161_AL512625.1,64	-4.54779	2.20288	0.000144229	0.10116	3.AD/1.YC	GABA_neurons
chr9:69672159-69672817	ENSG00000107282_APBA1,0;ENSG00000261447_AL162412.1,0	ENSG00000107282_APBA1,0;ENSG00000261447_AL162412.1,0	-1.1272	5.25593	0.00101872	0.177121	3.AD/1.YC	GABA_neurons
chr9:75087882-75088768	ENSG00000106733_NMRK1,0;ENSG00000134996_OSTF1,0	ENSG00000106733_NMRK1,0;ENSG00000134996_OSTF1,0	-1.07858	5.80801	0.000486739	0.147667	3.AD/1.YC	GABA_neurons
chr9:81826169-81827047			-2.12413	3.55453	0.000123964	0.096729	3.AD/1.YC	GABA_neurons
chr9:83980027-83980912	ENSG00000165119_HNRNPK,0;ENSG00000178966_RMI1,0	ENSG00000165119_HNRNPK,0;ENSG00000178966_RMI1,0	-1.17565	5.58161	0.000193725	0.111733	3.AD/1.YC	GABA_neurons
chr9:87871919-87872745			-2.47556	2.72541	0.00185975	0.213801	3.AD/1.YC	GABA_neurons
[truncated: 66 more rows]
