# Supplementary material for: A roadmap to human hippocampal neurogenesis in adulthood, aging and AD.
Source: Research Square preprint supplement (doi:10.21203/rs.3.rs-4469965/v1), 2024-05-30
Supplement: Supplementary file 8 [file 968b6a66969d681c450eb1d9.xlsx]

## Sheet: Sheet1
Specimen ID	Cohort	Age at Death	Sex	Post-mortem internval (PMI)	Cognitive Status	AD Neuropathologic Change (ADNC)	BRAAK neurofibrillary tangle distribution stage	CERAD cortical neuritic plaque density score	Thal amyloid plaque distribution phase	Cerebral amyloid angiopahty score	Lewy body disease neuropathology	Limbic-predominant, Age-related, TDP-43 Encephalopathy (LATE) Stage	Hippocampal Sclerosis
1	AD	91	Female	5.33333	Dementia	high	V	frequent	4	2	none	0	Not identified
2	AD	88	Male	4.9	Dementia	high	V	moderate	5	2	none	2	Not identified
3	AD	92	Male	6.3	Dementia	high	V	moderate	5	2	none	1	Not identified
4	AD	86	Female	6	Dementia	high	V	frequent	4	2	none	2	Not identified
5	NCI	78	Male	10	No dementia	not	0	none	0	0	none	0	Not identified
6	NCI	92	Female	7.5	No dementia	not	IV	none	0	2	none	1	Not identified
7	NCI	93	female	5	No dementia	not	II	none	0	0	none	0	Not identified
8	NCI	88	Male	9	No dementia	low	I	frequent	3	0	amygdala-predominant	0	Not identified
9	MCI	81	Male	4.7	No dementia	not	V	none	0	0	none	1	Not identified
10	MCI	93	Female	6	Early Dementia	high	V	moderate	5	2	amygdala-predominant	3	Not identified
11	MCI	80	Female	8.13333	No dementia	not	IV	none	0	0	none	0	Not identified
12	MCI	92	Female	3.5	Early Dementia	high	V	frequent	5	2	limbic (transitional)	0	Present on left only
13	Young CTRL	24	Male	5	No dementia	not	0	none	0	0	none	0	Not identified
14	Young CTRL	33	Male	5	No dementia	not	0	none	0	0	none	0	Not identified
