# Supplementary material for: A roadmap to human hippocampal neurogenesis in adulthood, aging and AD.
Source: Research Square preprint supplement (doi:10.21203/rs.3.rs-4469965/v1), 2024-05-30
Supplement: Supplementary file 9 [file 9786e9f497af562c715c26d9.xlsx]

## Sheet: MANGO_summary
Cluster	Contrast	Total	Up	Down
Immature	Diagnosis	29	0	0
Immature	1.YC/0.HA	52	37	15
Immature	2.MCI/0.HA	5	1	4
Immature	3.AD/0.HA	28	2	26
Immature	2.MCI/1.YC	20	1	19
Immature	3.AD/1.YC	78	8	70
Immature	3.AD/2.MCI	26	0	26
Neural Stem	Diagnosis	38	0	0
Neural Stem	1.YC/0.HA	31	15	16
Neural Stem	2.MCI/0.HA	14	1	13
Neural Stem	3.AD/0.HA	41	7	34
Neural Stem	2.MCI/1.YC	17	5	12
Neural Stem	3.AD/1.YC	69	29	40
Neural Stem	3.AD/2.MCI	17	12	5
Neuroblast	Diagnosis	19	0	0
Neuroblast	1.YC/0.HA	12	5	7
Neuroblast	2.MCI/0.HA	9	2	7
Neuroblast	3.AD/0.HA	13	1	12
Neuroblast	2.MCI/1.YC	6	1	5
Neuroblast	3.AD/1.YC	12	1	11
Neuroblast	3.AD/2.MCI	6	3	3
CODE	Acronym in manuscript
HA	NCI
YC	YA
MCI	MCI
AD	AD

## Sheet: MANGO
ID	Symbol	log2FC	log2CPM	PValue	QValue	Contrast	Cluster
ENSG00000189056	RELN	4.6554	5.36304	8.72331e-15	4.909e-11	1.YC/0.HA	Immature
ENSG00000079215	SLC1A3	-5.16906	7.2091	2.8659e-14	8.065e-11	3.AD/1.YC	Immature
ENSG00000105894	PTN	-12.2022	6.06663	1.18056e-11	2.215e-08	3.AD/1.YC	Immature
ENSG00000171476	HOPX	-2.3985	5.69587	1.77089e-11	2.492e-08	3.AD/1.YC	Neural Stem
ENSG00000066468	FGFR2	-11.9933	5.8892	9.28818e-11	1.045e-07	3.AD/1.YC	Immature
ENSG00000101439	CST3	-5.80446	6.04188	4.49557e-10	4.217e-07	3.AD/1.YC	Immature
ENSG00000079215	SLC1A3	-1.79496	10.4106	6.16335e-10	4.336e-07	3.AD/1.YC	Neural Stem
ENSG00000189056	RELN	-5.79323	9.87919	5.76998e-10	4.336e-07	3.AD/0.HA	Neuroblast
ENSG00000189056	RELN	-5.74487	5.99388	9.97175e-10	5.612e-07	3.AD/1.YC	Immature
ENSG00000110436	SLC1A2	-2.40888	11.5917	9.92404e-10	5.612e-07	3.AD/1.YC	Neural Stem
ENSG00000147246	HTR2C	-10.4354	6.60201	1.74466e-09	8.926e-07	3.AD/2.MCI	Immature
ENSG00000130203	APOE	-1.81469	7.92176	2.81552e-09	1.32e-06	3.AD/1.YC	Neural Stem
ENSG00000198121	LPAR1	-4.35951	6.15298	6.13767e-09	2.657e-06	3.AD/1.YC	Immature
ENSG00000130203	APOE	-1.76455	8.18775	3.28896e-08	1.234e-05	3.AD/0.HA	Neural Stem
ENSG00000138798	EGF	2.40742	4.0437	3.13252e-08	1.234e-05	3.AD/1.YC	Neural Stem
ENSG00000164434	FABP7	-3.06082	4.21597	3.70038e-08	1.302e-05	3.AD/1.YC	Neural Stem
ENSG00000079215	SLC1A3	-4.40664	6.90283	4.84051e-08	1.602e-05	3.AD/2.MCI	Immature
ENSG00000105894	PTN	-1.60217	8.38058	5.1316e-08	1.604e-05	3.AD/1.YC	Neural Stem
ENSG00000171885	AQP4	-4.04844	5.89463	9.72828e-08	2.738e-05	3.AD/1.YC	Immature
ENSG00000113494	PRLR			9.64001e-08	2.738e-05	Diagnosis	Neuroblast
ENSG00000189056	RELN	-4.8426	10.151	1.09694e-07	2.94e-05	2.MCI/0.HA	Neuroblast
ENSG00000147246	HTR2C	-11.0816	5.12637	2.44081e-07	6.244e-05	3.AD/1.YC	Immature
ENSG00000135919	SERPINE2	-5.05987	5.40235	2.63158e-07	6.439e-05	3.AD/1.YC	Immature
ENSG00000176165	FOXG1	-1.85743	5.81006	2.84025e-07	6.66e-05	3.AD/1.YC	Neural Stem
ENSG00000102468	HTR2A	-4.9597	5.3448	8.95758e-07	0.0002017	3.AD/1.YC	Immature
ENSG00000135919	SERPINE2	-1.64905	7.02	1.03497e-06	0.0002195	3.AD/1.YC	Neural Stem
ENSG00000106278	PTPRZ1	-1.34247	9.37585	1.05319e-06	0.0002195	3.AD/1.YC	Neural Stem
ENSG00000132639	SNAP25	-2.5785	6.12116	1.50172e-06	0.0003018	3.AD/1.YC	Neural Stem
ENSG00000068078	FGFR3	-2.20213	6.52495	2.13432e-06	0.0004142	3.AD/1.YC	Neural Stem
ENSG00000160307	S100B	-10.7089	4.81604	2.78592e-06	0.0004909	3.AD/1.YC	Immature
ENSG00000110436	SLC1A2	1.83341	11.8283	2.66933e-06	0.0004909	1.YC/0.HA	Neural Stem
ENSG00000058335	RASGRF1	2.3065	5.05815	2.79121e-06	0.0004909	3.AD/0.HA	Neural Stem
ENSG00000007062	PROM1	2.93735	1.89568	4.14772e-06	0.0007074	1.YC/0.HA	Immature
ENSG00000171094	ALK	-4.63626	5.05707	4.74494e-06	0.0007569	3.AD/1.YC	Immature
ENSG00000151090	THRB	-2.35998	8.27479	4.91015e-06	0.0007569	3.AD/1.YC	Immature
ENSG00000101439	CST3	-5.21617	5.86831	4.82141e-06	0.0007569	3.AD/2.MCI	Immature
ENSG00000189056	RELN			4.97625e-06	0.0007569	Diagnosis	Neuroblast
ENSG00000132386	SERPINF1			6.06129e-06	0.0008977	Diagnosis	Neuroblast
ENSG00000138685	FGF2	-1.29436	7.48953	7.5459e-06	0.001089	3.AD/1.YC	Neural Stem
ENSG00000113532	ST8SIA4	-3.11466	3.52259	7.97629e-06	0.001122	3.AD/0.HA	Neural Stem
ENSG00000107331	ABCA2	1.39683	7.43919	8.32311e-06	0.001142	3.AD/1.YC	Neural Stem
ENSG00000163513	TGFBR2	-2.88373	5.55101	8.68382e-06	0.00115	1.YC/0.HA	Neural Stem
ENSG00000145335	SNCA	1.48523	6.34306	8.78919e-06	0.00115	3.AD/1.YC	Neural Stem
ENSG00000120907	ADRA1A	2.36367	8.96813	1.15744e-05	0.00148	3.AD/1.YC	Immature
ENSG00000170345	FOS	-2.99474	6.28128	1.2889e-05	0.001612	3.AD/0.HA	Neural Stem
ENSG00000105894	PTN	-2.96628	6.0166	1.32857e-05	0.001625	2.MCI/1.YC	Immature
ENSG00000181449	SOX2	-10.29	4.47427	1.41853e-05	0.001699	3.AD/1.YC	Immature
ENSG00000154928	EPHB1	-1.43384	7.59993	1.8472e-05	0.002166	3.AD/1.YC	Neural Stem
ENSG00000017427	IGF1	1.65595	3.95843	2.58465e-05	0.002969	1.YC/0.HA	Immature
ENSG00000131095	GFAP	-3.82885	8.42761	2.69669e-05	0.003035	1.YC/0.HA	Neuroblast
ENSG00000164687	FABP5	-2.35552	5.33277	2.80907e-05	0.0031	3.AD/0.HA	Neural Stem
ENSG00000101439	CST3	-1.82984	8.60746	3.29532e-05	0.003567	3.AD/0.HA	Neural Stem
ENSG00000133216	EPHB2	1.63364	4.99532	3.48965e-05	0.003706	3.AD/0.HA	Neural Stem
ENSG00000120251	GRIA2	-1.35384	8.24489	3.69538e-05	0.003851	3.AD/1.YC	Neural Stem
ENSG00000118432	CNR1	-2.26657	6.12063	4.28403e-05	0.004305	3.AD/1.YC	Immature
ENSG00000006128	TAC1	-6.35257	1.98366	4.26435e-05	0.004305	3.AD/1.YC	Neural Stem
ENSG00000110092	CCND1	-3.68365	2.06516	5.01094e-05	0.004948	1.YC/0.HA	Neural Stem
ENSG00000138685	FGF2	-9.9711	4.21095	5.447e-05	0.005196	3.AD/1.YC	Immature
ENSG00000068078	FGFR3	-1.14805	6.05123	5.41257e-05	0.005196	3.AD/0.HA	Neural Stem
ENSG00000132639	SNAP25	-1.51985	5.61438	5.61712e-05	0.005269	3.AD/0.HA	Neural Stem
ENSG00000130203	APOE			5.89175e-05	0.005436	Diagnosis	Neural Stem
ENSG00000170214	ADRA1B	-2.06241	3.99282	6.50597e-05	0.005906	3.AD/1.YC	Neural Stem
ENSG00000125968	ID1	-2.12394	4.37079	7.06823e-05	0.006314	3.AD/0.HA	Neural Stem
ENSG00000138798	EGF	3.13038	4.67497	7.36391e-05	0.006476	2.MCI/1.YC	Neural Stem
ENSG00000138696	BMPR1B	-1.38932	9.00944	7.51235e-05	0.006505	3.AD/1.YC	Neural Stem
ENSG00000028137	TNFRSF1B	-3.92175	3.44097	7.75565e-05	0.006613	1.YC/0.HA	Neural Stem
ENSG00000165795	NDRG2	-3.5707	5.02974	8.63183e-05	0.007251	3.AD/1.YC	Immature
ENSG00000104327	CALB1	2.46315	5.96988	9.1861e-05	0.007603	3.AD/1.YC	Immature
ENSG00000187323	DCC	1.75799	6.48183	0.000105757	0.008626	3.AD/1.YC	Neural Stem
ENSG00000081479	LRP2	-4.1536	4.68171	0.000110831	0.008693	3.AD/1.YC	Immature
ENSG00000163513	TGFBR2	-9.86039	4.12359	0.000109591	0.008693	3.AD/1.YC	Immature
ENSG00000240972	MIF	-2.85244	6.64131	0.000111207	0.008693	3.AD/2.MCI	Immature
ENSG00000171885	AQP4	-1.11361	9.16439	0.000113267	0.008732	3.AD/1.YC	Neural Stem
ENSG00000101439	CST3	-2.2709	8.59104	0.000125734	0.009563	3.AD/1.YC	Neural Stem
ENSG00000099860	GADD45B	-3.14556	4.81947	0.000136674	0.01026	3.AD/0.HA	Neural Stem
ENSG00000133639	BTG1	-1.37924	5.388	0.000144117	0.01063	1.YC/0.HA	Immature
ENSG00000138798	EGF	-3.19167	4.79388	0.000145429	0.01063	1.YC/0.HA	Neural Stem
ENSG00000113532	ST8SIA4			0.000149533	0.01079	Diagnosis	Neural Stem
ENSG00000101439	CST3	-5.39994	6.05074	0.000152979	0.0109	3.AD/0.HA	Immature
ENSG00000170345	FOS	-2.32321	6.40023	0.00018548	0.01305	2.MCI/0.HA	Neural Stem
ENSG00000022355	GABRA1	-3.54524	3.39069	0.000189991	0.0132	3.AD/1.YC	Neural Stem
ENSG00000105894	PTN			0.000204868	0.01406	Diagnosis	Neural Stem
ENSG00000006128	TAC1	-9.74532	4.02417	0.000226619	0.01537	3.AD/1.YC	Immature
ENSG00000112576	CCND3	-3.76771	5.26167	0.000238685	0.01599	3.AD/2.MCI	Immature
ENSG00000134259	NGF	2.87757	1.69344	0.000245442	0.01606	1.YC/0.HA	Immature
ENSG00000128683	GAD1	-3.15625	2.39159	0.000245464	0.01606	3.AD/1.YC	Neural Stem
ENSG00000138696	BMPR1B	-2.20816	5.58468	0.000264375	0.01691	3.AD/1.YC	Immature
ENSG00000171885	AQP4	-3.34479	5.54164	0.000264241	0.01691	3.AD/2.MCI	Immature
ENSG00000106571	GLI3	-1.1916	8.18867	0.000302869	0.01915	3.AD/1.YC	Neural Stem
ENSG00000102755	FLT1	-3.05689	3.11569	0.00031537	0.01935	2.MCI/1.YC	Immature
ENSG00000130203	APOE	-2.44206	5.52108	0.00031559	0.01935	3.AD/1.YC	Immature
ENSG00000134982	APC	-0.988156	9.37429	0.00031638	0.01935	3.AD/1.YC	Neural Stem
ENSG00000187323	DCC	1.31105	6.43939	0.000326424	0.01975	3.AD/0.HA	Neural Stem
ENSG00000066468	FGFR2	-8.16403	4.55506	0.000348087	0.02084	3.AD/2.MCI	Immature
ENSG00000107562	CXCL12	-3.20364	3.15674	0.000361898	0.02144	2.MCI/0.HA	Immature
ENSG00000132326	PER2	-9.66428	3.96601	0.00036991	0.02158	3.AD/1.YC	Immature
ENSG00000113140	SPARC	-9.53477	3.85223	0.000375709	0.02158	3.AD/1.YC	Immature
ENSG00000112038	OPRM1	-4.57611	2.49975	0.000374484	0.02158	3.AD/0.HA	Neural Stem
ENSG00000118971	CCND2	-2.95968	5.04347	0.000393305	0.02202	3.AD/1.YC	Immature
ENSG00000135919	SERPINE2	-4.29744	4.86962	0.000398704	0.02202	3.AD/2.MCI	Immature
ENSG00000197921	HES5	-3.24332	2.38577	0.000399087	0.02202	3.AD/0.HA	Neural Stem
ENSG00000164687	FABP5			0.000389345	0.02202	Diagnosis	Neuroblast
ENSG00000197921	HES5	-3.45611	2.52896	0.000411341	0.02248	3.AD/1.YC	Neural Stem
ENSG00000112715	VEGFA	-2.77998	3.11366	0.000427147	0.02312	2.MCI/1.YC	Immature
ENSG00000101439	CST3			0.000438156	0.02349	Diagnosis	Neural Stem
ENSG00000188906	LRRK2	-2.40758	5.46298	0.000449618	0.02387	3.AD/1.YC	Immature
ENSG00000081479	LRP2	-3.10624	4.4095	0.000474833	0.02498	2.MCI/1.YC	Immature
ENSG00000164687	FABP5	-2.85301	4.7179	0.000504581	0.02523	3.AD/0.HA	Immature
ENSG00000128564	VGF	-9.47079	3.81247	0.000495266	0.02523	3.AD/1.YC	Immature
ENSG00000077279	DCX	-2.57249	5.03628	0.000502631	0.02523	3.AD/1.YC	Immature
ENSG00000133216	EPHB2			0.00050667	0.02523	Diagnosis	Neural Stem
ENSG00000112038	OPRM1			0.000484593	0.02523	Diagnosis	Neural Stem
ENSG00000189056	RELN	-5.62342	10.2111	0.000505211	0.02523	1.YC/0.HA	Neuroblast
ENSG00000120251	GRIA2	1.52829	8.23189	0.000516784	0.02551	1.YC/0.HA	Neural Stem
ENSG00000104327	CALB1	-1.97406	5.77322	0.000537446	0.0263	1.YC/0.HA	Immature
ENSG00000118971	CCND2	-2.43341	4.87449	0.000608064	0.02928	3.AD/0.HA	Immature
ENSG00000113532	ST8SIA4	-2.61581	3.58259	0.000613551	0.02928	2.MCI/0.HA	Neural Stem
ENSG00000133216	EPHB2	1.14767	5.17684	0.000613954	0.02928	3.AD/1.YC	Neural Stem
ENSG00000163513	TGFBR2	1.95962	4.69133	0.000659586	0.03119	3.AD/1.YC	Neural Stem
ENSG00000058335	RASGRF1			0.000674704	0.03164	Diagnosis	Neural Stem
ENSG00000028137	TNFRSF1B			0.000680645	0.03166	Diagnosis	Neural Stem
ENSG00000167720	SRR	1.40947	3.6888	0.000690042	0.03183	3.AD/0.HA	Neural Stem
ENSG00000064651	SLC12A2	1.12159	6.7753	0.000709182	0.03219	1.YC/0.HA	Immature
ENSG00000116678	LEPR	1.91106	7.05751	0.000716771	0.03219	3.AD/1.YC	Immature
ENSG00000159388	BTG2	-2.70313	5.59871	0.000724669	0.03219	2.MCI/0.HA	Neural Stem
ENSG00000159388	BTG2	-2.62734	5.59949	0.000713479	0.03219	3.AD/0.HA	Neural Stem
ENSG00000152413	HOMER1	1.91863	7.13045	0.000726431	0.03219	1.YC/0.HA	Neuroblast
ENSG00000117707	PROX1	1.84398	7.52842	0.00075234	0.03282	3.AD/1.YC	Immature
ENSG00000148180	GSN	-2.31157	5.35243	0.000750218	0.03282	3.AD/1.YC	Immature
ENSG00000017427	IGF1	-3.70946	4.332	0.000783933	0.03366	3.AD/1.YC	Immature
ENSG00000145335	SNCA			0.000788346	0.03366	Diagnosis	Neural Stem
ENSG00000172137	CALB2	-3.92191	6.02899	0.000789412	0.03366	3.AD/0.HA	Neuroblast
ENSG00000131095	GFAP	-3.73985	5.51789	0.00080322	0.03374	3.AD/2.MCI	Immature
ENSG00000163513	TGFBR2	-0.936907	5.72098	0.000799184	0.03374	3.AD/0.HA	Neural Stem
ENSG00000105835	NAMPT	-2.2866	6.92178	0.000827832	0.03451	3.AD/0.HA	Neural Stem
ENSG00000072864	NDE1	-2.26119	3.94106	0.000865123	0.03513	2.MCI/1.YC	Immature
ENSG00000152822	GRM1	1.73172	9.8623	0.000866007	0.03513	3.AD/1.YC	Immature
ENSG00000148053	NTRK2	-1.58489	8.89857	0.000867646	0.03513	3.AD/1.YC	Immature
ENSG00000171476	HOPX	-1.85648	5.55195	0.000853872	0.03513	3.AD/2.MCI	Neural Stem
ENSG00000116678	LEPR	1.58417	6.89886	0.000910549	0.03634	3.AD/0.HA	Immature
ENSG00000128683	GAD1			0.000904417	0.03634	Diagnosis	Neuroblast
ENSG00000126368	NR1D1	-1.66527	3.27333	0.000920839	0.0365	3.AD/0.HA	Neural Stem
ENSG00000170345	FOS			0.000934995	0.0368	Diagnosis	Neural Stem
ENSG00000151322	NPAS3	1.45346	9.34693	0.00101725	0.0395	1.YC/0.HA	Immature
ENSG00000132639	SNAP25			0.00102469	0.0395	Diagnosis	Neural Stem
ENSG00000128683	GAD1	2.2998	5.49764	0.00102191	0.0395	1.YC/0.HA	Neuroblast
ENSG00000120907	ADRA1A	-2.50802	9.13981	0.0010431	0.03994	1.YC/0.HA	Immature
ENSG00000091136	LAMB1	-6.37049	5.99149	0.00106046	0.04033	3.AD/0.HA	Neuroblast
ENSG00000173805	HAP1	-1.81777	5.15458	0.00110111	0.04159	3.AD/0.HA	Neural Stem
ENSG00000240972	MIF	-2.01456	5.65371	0.00113769	0.04266	3.AD/1.YC	Immature
ENSG00000198121	LPAR1	-2.901	5.14439	0.00114457	0.04266	3.AD/2.MCI	Immature
ENSG00000160789	LMNA	-9.29042	3.65446	0.00116506	0.04286	3.AD/1.YC	Immature
ENSG00000137462	TLR2	-3.76884	4.3664	0.00116224	0.04286	3.AD/0.HA	Neural Stem
ENSG00000107562	CXCL12			0.00119317	0.0436	Diagnosis	Immature
ENSG00000167552	TUBA1A	-1.90987	6.40802	0.0012007	0.0436	3.AD/1.YC	Immature
ENSG00000017427	IGF1			0.00121362	0.04378	Diagnosis	Immature
ENSG00000137462	TLR2	-3.4321	4.36011	0.00124473	0.04462	2.MCI/0.HA	Neural Stem
ENSG00000068078	FGFR3			0.00126565	0.04508	Diagnosis	Neural Stem
ENSG00000169083	AR	1.79506	4.46222	0.00130058	0.04571	3.AD/1.YC	Neural Stem
ENSG00000132386	SERPINF1	-3.31445	6.21429	0.00130764	0.04571	2.MCI/0.HA	Neuroblast
ENSG00000131437	KIF3A	-1.9424	7.71204	0.0013021	0.04571	3.AD/1.YC	Neuroblast
ENSG00000112576	CCND3	-2.99494	4.59942	0.00132981	0.0462	3.AD/1.YC	Immature
ENSG00000122585	NPY	4.28045	3.74731	0.00135979	0.04695	1.YC/0.HA	Immature
ENSG00000144476	ACKR3	-1.57826	4.36297	0.00138697	0.0476	3.AD/0.HA	Neural Stem
ENSG00000189056	RELN	1.72135	4.72742	0.00141003	0.04809	3.AD/1.YC	Neural Stem
ENSG00000087245	MMP2	3.63273	1.74228	0.00142469	0.0483	3.AD/1.YC	Neural Stem
ENSG00000182220	ATP6AP2	-1.92697	5.48564	0.00144216	0.04831	3.AD/0.HA	Immature
ENSG00000111728	ST8SIA1	-3.78252	5.96923	0.00143662	0.04831	3.AD/0.HA	Neuroblast
ENSG00000112964	GHR	-1.88026	5.76788	0.0014585	0.04857	2.MCI/1.YC	Immature
ENSG00000138798	EGF			0.00151502	0.05004	Diagnosis	Neural Stem
ENSG00000112038	OPRM1	-3.44021	2.4115	0.00152939	0.05004	2.MCI/0.HA	Neural Stem
ENSG00000022355	GABRA1	-2.18672	7.59154	0.00152118	0.05004	2.MCI/1.YC	Neuroblast
ENSG00000171094	ALK	-3.22224	4.17811	0.00156328	0.05079	3.AD/0.HA	Immature
ENSG00000102468	HTR2A	-2.33033	5.31506	0.00158132	0.05079	2.MCI/1.YC	Immature
ENSG00000110436	SLC1A2	-1.55752	8.70163	0.00158577	0.05079	3.AD/1.YC	Immature
ENSG00000188906	LRRK2	-1.07186	4.86723	0.00158844	0.05079	3.AD/0.HA	Neural Stem
ENSG00000154928	EPHB1	1.3222	7.7048	0.00164437	0.05229	1.YC/0.HA	Neural Stem
ENSG00000006128	TAC1	3.41845	3.27148	0.00168935	0.05308	1.YC/0.HA	Immature
ENSG00000026103	FAS	1.87374	1.77562	0.00175293	0.05308	1.YC/0.HA	Immature
ENSG00000100285	NEFH	-9.08347	3.49028	0.00176714	0.05308	3.AD/1.YC	Immature
ENSG00000100097	LGALS1	-9.08143	3.48381	0.00177228	0.05308	3.AD/1.YC	Immature
ENSG00000173406	DAB1	1.25888	6.87148	0.00176971	0.05308	1.YC/0.HA	Neural Stem
ENSG00000130203	APOE	-1.28848	8.33958	0.00171654	0.05308	2.MCI/0.HA	Neural Stem
ENSG00000128683	GAD1	-2.57322	2.01015	0.00172115	0.05308	3.AD/0.HA	Neural Stem
ENSG00000022355	GABRA1	-2.75997	3.56169	0.00168683	0.05308	2.MCI/1.YC	Neural Stem
ENSG00000064651	SLC12A2	0.937155	7.81254	0.0017138	0.05308	3.AD/1.YC	Neural Stem
ENSG00000148180	GSN	0.88836	7.79681	0.00173534	0.05308	3.AD/1.YC	Neural Stem
ENSG00000091136	LAMB1			0.00177295	0.05308	Diagnosis	Neuroblast
ENSG00000122585	NPY	-10.3924	4.54363	0.00180287	0.05369	3.AD/1.YC	Immature
ENSG00000089250	NOS1	1.18572	3.55667	0.00184205	0.054	1.YC/0.HA	Immature
ENSG00000171867	PRNP	-1.99254	7.34235	0.00184006	0.054	3.AD/2.MCI	Immature
ENSG00000159388	BTG2			0.00182924	0.054	Diagnosis	Neural Stem
ENSG00000087245	MMP2	-4.31865	1.75152	0.00185572	0.05411	1.YC/0.HA	Neural Stem
ENSG00000110092	CCND1			0.00189582	0.055	Diagnosis	Neural Stem
ENSG00000176697	BDNF	-2.05373	6.43364	0.00194215	0.05605	1.YC/0.HA	Immature
ENSG00000132386	SERPINF1	-3.8805	6.10428	0.00200087	0.05745	3.AD/0.HA	Neuroblast
ENSG00000141433	ADCYAP1	-2.94584	2.18301	0.0020328	0.05807	2.MCI/1.YC	Immature
ENSG00000131095	GFAP	-3.3422	4.91798	0.0020476	0.0582	3.AD/1.YC	Immature
ENSG00000113140	SPARC	1.16601	5.83481	0.00207797	0.05877	3.AD/1.YC	Neural Stem
ENSG00000137752	CASP1			0.00213889	0.06019	Diagnosis	Neural Stem
ENSG00000120088	CRHR1	3.36595	2.20688	0.00215325	0.06029	3.AD/1.YC	Neural Stem
ENSG00000102755	FLT1	-4.43109	6.07451	0.00218116	0.06077	2.MCI/0.HA	Neuroblast
ENSG00000172137	CALB2	1.88901	2.82064	0.00219876	0.06096	1.YC/0.HA	Immature
ENSG00000105810	CDK6	1.08577	6.957	0.00233882	0.06452	3.AD/1.YC	Neural Stem
ENSG00000113532	ST8SIA4	-2.62389	3.67769	0.00235955	0.06478	1.YC/0.HA	Neural Stem
ENSG00000102468	HTR2A			0.00243472	0.06608	Diagnosis	Immature
ENSG00000240972	MIF	-2.21182	6.02666	0.00245503	0.06608	3.AD/0.HA	Immature
ENSG00000112715	VEGFA	-8.99883	3.41842	0.00246308	0.06608	3.AD/1.YC	Immature
ENSG00000102755	FLT1	-9.01501	3.43165	0.0024485	0.06608	3.AD/1.YC	Immature
ENSG00000110436	SLC1A2			0.00248903	0.06608	Diagnosis	Neural Stem
ENSG00000125968	ID1			0.00248253	0.06608	Diagnosis	Neural Stem
ENSG00000131095	GFAP	2.10602	8.87596	0.00247025	0.06608	3.AD/2.MCI	Neuroblast
ENSG00000125968	ID1	-2.11195	4.39187	0.00251048	0.06633	2.MCI/0.HA	Neural Stem
ENSG00000100097	LGALS1			0.00256205	0.06738	Diagnosis	Neuroblast
ENSG00000133639	BTG1	-1.7773	5.40597	0.00264809	0.06932	3.AD/0.HA	Immature
ENSG00000189056	RELN			0.0026736	0.06966	Diagnosis	Immature
ENSG00000147246	HTR2C	-2.25661	6.35161	0.00275283	0.0714	2.MCI/1.YC	Neuroblast
ENSG00000132639	SNAP25	-1.79031	6.39632	0.00279841	0.07192	2.MCI/1.YC	Neural Stem
ENSG00000172137	CALB2	-3.48368	5.84049	0.00279171	0.07192	1.YC/0.HA	Neuroblast
ENSG00000160307	S100B	-7.77793	4.27274	0.0028299	0.07239	3.AD/2.MCI	Immature
ENSG00000126351	THRA	-1.13081	5.79031	0.00287157	0.07313	1.YC/0.HA	Immature
ENSG00000171476	HOPX	1.52162	5.97394	0.00288591	0.07316	1.YC/0.HA	Neural Stem
ENSG00000028137	TNFRSF1B	-2.2223	3.48969	0.0029098	0.07344	3.AD/0.HA	Neural Stem
ENSG00000124766	SOX4	1.62749	2.42792	0.00298655	0.07358	1.YC/0.HA	Immature
ENSG00000150594	ADRA2A	2.97815	0.782646	0.00294578	0.07358	1.YC/0.HA	Immature
ENSG00000182220	ATP6AP2	-1.95856	5.2683	0.00299413	0.07358	3.AD/1.YC	Immature
ENSG00000028137	TNFRSF1B	-2.59301	3.41145	0.00298293	0.07358	2.MCI/0.HA	Neural Stem
ENSG00000147246	HTR2C			0.00294871	0.07358	Diagnosis	Neuroblast
ENSG00000147246	HTR2C	-2.92605	6.16475	0.00295996	0.07358	3.AD/1.YC	Neuroblast
ENSG00000079215	SLC1A3			0.00306695	0.07505	Diagnosis	Neural Stem
ENSG00000176165	FOXG1	1.08771	6.14175	0.00317426	0.07734	1.YC/0.HA	Neural Stem
ENSG00000073282	TP63	-2.47672	2.79803	0.00320779	0.07782	1.YC/0.HA	Neural Stem
ENSG00000118971	CCND2			0.00325632	0.07835	Diagnosis	Immature
ENSG00000137462	TLR2			0.00325755	0.07835	Diagnosis	Neural Stem
ENSG00000081479	LRP2	1.1802	7.43359	0.00332009	0.07951	3.AD/2.MCI	Neural Stem
ENSG00000164687	FABP5	-2.78891	6.66016	0.00334809	0.07984	3.AD/0.HA	Neuroblast
ENSG00000171316	CHD7	1.04107	6.09717	0.00347177	0.08244	1.YC/0.HA	Immature
ENSG00000162992	NEUROD1	-1.97577	4.09496	0.00355256	0.08268	1.YC/0.HA	Immature
ENSG00000162992	NEUROD1	2.34191	4.40036	0.00353912	0.08268	2.MCI/1.YC	Immature
ENSG00000132386	SERPINF1	-2.42899	2.16464	0.00350918	0.08268	2.MCI/1.YC	Immature
ENSG00000068078	FGFR3	-3.25033	3.93446	0.00358867	0.08268	3.AD/1.YC	Immature
ENSG00000154928	EPHB1			0.00359643	0.08268	Diagnosis	Neural Stem
ENSG00000176165	FOXG1			0.00351138	0.08268	Diagnosis	Neural Stem
ENSG00000112964	GHR	-1.36004	5.67044	0.00359915	0.08268	1.YC/0.HA	Neural Stem
ENSG00000113494	PRLR	-6.64356	5.56334	0.00357814	0.08268	1.YC/0.HA	Neuroblast
ENSG00000112333	NR2E1	3.15624	0.95688	0.00363842	0.08324	1.YC/0.HA	Immature
ENSG00000131095	GFAP	-1.31247	9.10268	0.00369256	0.08414	3.AD/0.HA	Neural Stem
ENSG00000132326	PER2	-7.07567	3.34162	0.00372761	0.08449	3.AD/0.HA	Immature
ENSG00000154928	EPHB1	-2.26617	6.12007	0.00373817	0.08449	3.AD/1.YC	Immature
ENSG00000120251	GRIA2			0.0038567	0.08682	Diagnosis	Neural Stem
ENSG00000148053	NTRK2	1.07781	8.8836	0.00387309	0.08684	1.YC/0.HA	Immature
ENSG00000112964	GHR	1.15785	5.46777	0.00393794	0.08795	3.AD/1.YC	Neural Stem
ENSG00000272398	CD24	-1.82882	5.34651	0.00400834	0.08812	1.YC/0.HA	Immature
ENSG00000164434	FABP7	-2.04994	3.86378	0.00399903	0.08812	3.AD/0.HA	Neural Stem
ENSG00000101439	CST3	-1.40848	8.93416	0.00398193	0.08812	2.MCI/1.YC	Neural Stem
ENSG00000082175	PGR	2.46371	3.01813	0.00396131	0.08812	3.AD/1.YC	Neural Stem
ENSG00000022355	GABRA1			0.00404343	0.08855	Diagnosis	Neural Stem
ENSG00000147246	HTR2C	1.73077	6.14455	0.00411375	0.08957	1.YC/0.HA	Neuroblast
ENSG00000128564	VGF	-5.44577	5.44639	0.00412217	0.08957	3.AD/0.HA	Neuroblast
ENSG00000058335	RASGRF1	1.31563	5.29102	0.00415763	0.09	3.AD/2.MCI	Neural Stem
ENSG00000127152	BCL11B	1.55992	7.41252	0.00417624	0.09005	3.AD/1.YC	Immature
ENSG00000130203	APOE	-1.36516	8.13167	0.00421323	0.0905	2.MCI/1.YC	Neural Stem
ENSG00000136238	RAC1	-1.96397	6.95497	0.00425388	0.09103	3.AD/2.MCI	Immature
ENSG00000171867	PRNP			0.00447876	0.09548	Diagnosis	Immature
ENSG00000127152	BCL11B	-1.31223	7.25301	0.0045408	0.0964	1.YC/0.HA	Immature
ENSG00000112576	CCND3	-2.65268	4.55513	0.00455606	0.0964	3.AD/0.HA	Immature
ENSG00000104327	CALB1			0.004579	0.09652	Diagnosis	Neuroblast
ENSG00000168394	TAP1	-1.6521	2.78729	0.00471206	0.09895	3.AD/1.YC	Neural Stem
ENSG00000113657	DPYSL3	-2.71394	4.34886	0.00479481	0.09979	3.AD/1.YC	Immature
ENSG00000171476	HOPX			0.00485644	0.09979	Diagnosis	Neural Stem
ENSG00000173805	HAP1	-2.40009	5.2595	0.00486752	0.09979	1.YC/0.HA	Neural Stem
ENSG00000134250	NOTCH2	-0.930669	7.00797	0.00481283	0.09979	3.AD/1.YC	Neural Stem
ENSG00000138039	LHCGR	2.0202	3.0006	0.00483782	0.09979	3.AD/1.YC	Neural Stem
ENSG00000074047	GLI2	-0.851522	5.56202	0.00487596	0.09979	3.AD/1.YC	Neural Stem
ENSG00000072864	NDE1	1.02915	6.23273	0.00483238	0.09979	3.AD/1.YC	Neural Stem
ENSG00000151090	THRB	-1.79053	8.35642	0.00493281	0.09999	2.MCI/1.YC	Immature
ENSG00000118785	SPP1	-2.73104	6.0835	0.00493322	0.09999	3.AD/1.YC	Immature
ENSG00000100097	LGALS1	-2.24797	6.8648	0.00493885	0.09999	2.MCI/0.HA	Neuroblast
ENSG00000091831	ESR1	-1.1011	4.15964	0.00499085	0.1003	1.YC/0.HA	Immature
ENSG00000117707	PROX1	1.20158	5.58138	0.00498433	0.1003	3.AD/0.HA	Neural Stem
ENSG00000110436	SLC1A2	1.19606	8.60387	0.00501997	0.1004	1.YC/0.HA	Immature
ENSG00000171867	PRNP	-1.3645	6.80336	0.00503127	0.1004	3.AD/0.HA	Immature
ENSG00000181449	SOX2	-7.39675	3.81228	0.00511633	0.1014	3.AD/2.MCI	Immature
ENSG00000072864	NDE1	1.11364	6.12918	0.00511034	0.1014	3.AD/0.HA	Neural Stem
ENSG00000138336	TET1	1.0788	4.19964	0.00521685	0.1019	1.YC/0.HA	Immature
ENSG00000105894	PTN	-8.35043	4.34779	0.00519321	0.1019	3.AD/0.HA	Immature
ENSG00000102468	HTR2A	-3.23545	4.21387	0.00518574	0.1019	3.AD/0.HA	Immature
ENSG00000113140	SPARC	-1.52847	6.16882	0.00521422	0.1019	1.YC/0.HA	Neural Stem
ENSG00000122756	CNTFR	1.2548	4.67339	0.00542249	0.1056	1.YC/0.HA	Neural Stem
ENSG00000197921	HES5			0.00549078	0.1058	Diagnosis	Neural Stem
ENSG00000105835	NAMPT			0.0054498	0.1058	Diagnosis	Neural Stem
ENSG00000167720	SRR			0.00547086	0.1058	Diagnosis	Neural Stem
ENSG00000171552	BCL2L1	0.882212	6.44874	0.00550789	0.1058	3.AD/1.YC	Neural Stem
ENSG00000105894	PTN	-0.718346	8.05744	0.00569554	0.109	3.AD/0.HA	Neural Stem
ENSG00000107562	CXCL12	-7.15648	3.38687	0.00582029	0.1109	3.AD/0.HA	Immature
ENSG00000087245	MMP2	4.63923	2.06754	0.00583502	0.1109	2.MCI/1.YC	Neural Stem
ENSG00000160307	S100B	-8.25936	4.27868	0.00589649	0.111	3.AD/0.HA	Immature
ENSG00000138795	LEF1	-2.9126	1.80337	0.00589058	0.111	2.MCI/1.YC	Immature
ENSG00000105835	NAMPT	-2.00346	7.00993	0.00585521	0.111	2.MCI/0.HA	Neural Stem
ENSG00000164687	FABP5			0.0059459	0.1112	Diagnosis	Immature
ENSG00000066468	FGFR2	-8.25905	4.27259	0.00593606	0.1112	3.AD/0.HA	Immature
ENSG00000121853	GHSR	-1.78849	2.69856	0.00634102	0.1162	2.MCI/0.HA	Immature
ENSG00000084093	REST	-8.57502	3.06075	0.00630524	0.1162	3.AD/1.YC	Immature
ENSG00000138798	EGF	-8.56926	3.05971	0.00630703	0.1162	3.AD/1.YC	Immature
ENSG00000174775	HRAS	-8.57291	3.06067	0.00630538	0.1162	3.AD/1.YC	Immature
ENSG00000189056	RELN	-3.8722	4.82018	0.00633295	0.1162	3.AD/2.MCI	Immature
ENSG00000124762	CDKN1A	2.65894	2.78752	0.00626691	0.1162	2.MCI/1.YC	Neural Stem
ENSG00000100285	NEFH			0.00637248	0.1164	Diagnosis	Neuroblast
ENSG00000165795	NDRG2	-2.88363	4.61998	0.00665056	0.1207	3.AD/2.MCI	Immature
ENSG00000182220	ATP6AP2	-1.03776	5.08139	0.00664335	0.1207	3.AD/0.HA	Neural Stem
ENSG00000136869	TLR4	-8.79135	3.24461	0.00669113	0.1208	3.AD/1.YC	Immature
ENSG00000112333	NR2E1	-1.20397	4.00018	0.00674196	0.1208	3.AD/1.YC	Neural Stem
ENSG00000022355	GABRA1			0.00670433	0.1208	Diagnosis	Neuroblast
ENSG00000133639	BTG1	-2.55276	6.32603	0.00672947	0.1208	1.YC/0.HA	Neuroblast
ENSG00000142192	APP	0.932554	9.02584	0.00677859	0.1211	3.AD/1.YC	Neural Stem
ENSG00000072864	NDE1	-2.51548	4.21436	0.006856	0.1218	3.AD/1.YC	Immature
ENSG00000145335	SNCA	-1.80008	7.95819	0.00686301	0.1218	3.AD/0.HA	Neuroblast
ENSG00000125378	BMP4	2.82957	1.91096	0.00703821	0.1238	3.AD/1.YC	Neural Stem
ENSG00000111728	ST8SIA1	-3.3192	6.04248	0.0070222	0.1238	3.AD/2.MCI	Neuroblast
ENSG00000172137	CALB2	-3.24444	6.00962	0.00703198	0.1238	3.AD/2.MCI	Neuroblast
ENSG00000141510	TP53	-1.17039	4.34309	0.00717667	0.1258	3.AD/1.YC	Neural Stem
ENSG00000198576	ARC	2.84864	1.67503	0.0072478	0.1263	1.YC/0.HA	Immature
ENSG00000022355	GABRA1	-2.56891	7.34385	0.00724358	0.1263	3.AD/1.YC	Neuroblast
ENSG00000084093	REST	1.79023	2.54099	0.00729173	0.1267	1.YC/0.HA	Immature
ENSG00000107562	CXCL12	-2.03862	3.02777	0.00736353	0.1275	1.YC/0.HA	Immature
ENSG00000171532	NEUROD2	-1.05697	4.46724	0.00742327	0.128	1.YC/0.HA	Immature
ENSG00000111728	ST8SIA1	-3.13427	5.47954	0.00743683	0.128	3.AD/1.YC	Neuroblast
ENSG00000112333	NR2E1			0.00749968	0.1287	Diagnosis	Immature
ENSG00000112715	VEGFA			0.0075558	0.1289	Diagnosis	Immature
ENSG00000073282	TP63	1.9882	2.52475	0.00755787	0.1289	3.AD/1.YC	Neural Stem
ENSG00000205927	OLIG2	3.02357	2.15172	0.00770478	0.1292	1.YC/0.HA	Immature
ENSG00000102879	CORO1A			0.00771046	0.1292	Diagnosis	Neural Stem
ENSG00000170214	ADRA1B	1.75681	4.06689	0.00769001	0.1292	1.YC/0.HA	Neural Stem
ENSG00000181449	SOX2	-0.861756	6.93475	0.00762211	0.1292	3.AD/0.HA	Neural Stem
ENSG00000160789	LMNA	0.953009	5.13646	0.00764931	0.1292	3.AD/1.YC	Neural Stem
ENSG00000072864	NDE1	1.0362	6.17693	0.00766393	0.1292	3.AD/2.MCI	Neural Stem
ENSG00000068078	FGFR3	-1.78203	6.71312	0.00777106	0.1298	2.MCI/1.YC	Neural Stem
ENSG00000132326	PER2	-7.31155	3.8057	0.00785811	0.1305	3.AD/2.MCI	Immature
ENSG00000152413	HOMER1			0.00786187	0.1305	Diagnosis	Neuroblast
ENSG00000162998	FRZB	-1.99834	2.3399	0.00795098	0.1312	2.MCI/1.YC	Immature
ENSG00000154928	EPHB1	2.22261	6.84743	0.00794242	0.1312	2.MCI/0.HA	Neuroblast
ENSG00000113494	PRLR	-4.55719	2.83331	0.00820534	0.1339	3.AD/0.HA	Neural Stem
ENSG00000105894	PTN	-1.21202	8.59666	0.00816631	0.1339	2.MCI/1.YC	Neural Stem
ENSG00000007372	PAX6	-0.864526	5.60765	0.00820376	0.1339	3.AD/1.YC	Neural Stem
ENSG00000133794	ARNTL	-1.08566	5.67175	0.00819875	0.1339	3.AD/2.MCI	Neural Stem
ENSG00000145335	SNCA	-1.53529	7.53679	0.00827019	0.1345	3.AD/1.YC	Neuroblast
ENSG00000026103	FAS	-1.87583	5.36347	0.00830805	0.1347	3.AD/0.HA	Neural Stem
ENSG00000198576	ARC			0.00834786	0.135	Diagnosis	Immature
ENSG00000130203	APOE	-2.18253	8.06898	0.00841195	0.1357	1.YC/0.HA	Neuroblast
ENSG00000006128	TAC1	-7.58146	4.2414	0.00869721	0.1399	3.AD/2.MCI	Immature
ENSG00000122641	INHBA	-7.06942	3.34583	0.00888075	0.1424	3.AD/0.HA	Immature
ENSG00000120251	GRIA2	-1.27859	8.3215	0.00906814	0.145	2.MCI/1.YC	Neural Stem
ENSG00000079215	SLC1A3	-0.887154	10.0851	0.00926642	0.1477	3.AD/0.HA	Neural Stem
ENSG00000120088	CRHR1			0.00935486	0.1487	Diagnosis	Neural Stem
ENSG00000173805	HAP1			0.00941261	0.1492	Diagnosis	Neural Stem
ENSG00000079215	SLC1A3	-3.26129	5.8305	0.00946893	0.1497	3.AD/0.HA	Immature
ENSG00000126368	NR1D1			0.00952378	0.1501	Diagnosis	Neural Stem
ENSG00000006128	TAC1	-3.09906	5.45779	0.00955768	0.1503	3.AD/1.YC	Neuroblast
ENSG00000106571	GLI3	0.952521	8.35837	0.00960634	0.1506	1.YC/0.HA	Neural Stem
ENSG00000066468	FGFR2	1.00116	8.18485	0.00967788	0.1513	1.YC/0.HA	Neural Stem
ENSG00000132386	SERPINF1	-3.00176	2.72491	0.00979032	0.1526	2.MCI/0.HA	Immature
ENSG00000164687	FABP5	-2.98834	4.85819	0.00981462	0.1526	3.AD/2.MCI	Immature
ENSG00000126368	NR1D1	-1.46317	3.37214	0.00985323	0.1528	1.YC/0.HA	Neural Stem
ENSG00000150594	ADRA2A			0.00990433	0.1531	Diagnosis	Immature
ENSG00000113140	SPARC			0.00997311	0.1538	Diagnosis	Neural Stem
ENSG00000113494	PRLR	-5.87858	5.72936	0.0100507	0.1541	3.AD/0.HA	Neuroblast
ENSG00000151090	THRB	-1.58555	7.19984	0.0100367	0.1541	3.AD/1.YC	Neuroblast
ENSG00000151090	THRB			0.010321	0.1553	Diagnosis	Immature
ENSG00000172137	CALB2	-1.92616	3.18319	0.0102374	0.1553	2.MCI/1.YC	Immature
ENSG00000164600	NEUROD6	-2.79018	4.6664	0.0103506	0.1553	3.AD/2.MCI	Immature
ENSG00000134259	NGF	-2.69355	2.59083	0.010343	0.1553	1.YC/0.HA	Neural Stem
ENSG00000058335	RASGRF1	0.892068	5.41532	0.0102453	0.1553	3.AD/1.YC	Neural Stem
ENSG00000128564	VGF			0.0102973	0.1553	Diagnosis	Neuroblast
ENSG00000112964	GHR	-2.57359	6.28357	0.0103139	0.1553	3.AD/0.HA	Neuroblast
ENSG00000058335	RASGRF1	-1.63125	6.88749	0.0103344	0.1553	2.MCI/1.YC	Neuroblast
ENSG00000162992	NEUROD1			0.010541	0.1574	Diagnosis	Immature
ENSG00000154764	WNT7A	2.87833	1.07163	0.0105444	0.1574	1.YC/0.HA	Immature
ENSG00000007062	PROM1			0.0107753	0.1602	Diagnosis	Immature
ENSG00000022355	GABRA1	1.60929	7.48267	0.0107848	0.1602	1.YC/0.HA	Neuroblast
ENSG00000165806	CASP7	-1.09364	5.0821	0.0108273	0.1603	3.AD/1.YC	Neural Stem
ENSG00000006128	TAC1	-3.69537	6.26221	0.0108486	0.1603	3.AD/2.MCI	Neuroblast
ENSG00000073282	TP63	3.11328	3.12928	0.0109473	0.1613	2.MCI/1.YC	Neural Stem
ENSG00000136238	RAC1	-1.40003	6.45495	0.0111068	0.1629	3.AD/0.HA	Immature
ENSG00000205927	OLIG2			0.0111131	0.1629	Diagnosis	Neuroblast
ENSG00000136238	RAC1			0.0113808	0.1664	Diagnosis	Immature
ENSG00000147246	HTR2C	4.0456	6.12607	0.0116366	0.1697	2.MCI/0.HA	Immature
ENSG00000171094	ALK			0.0117035	0.1698	Diagnosis	Immature
ENSG00000079215	SLC1A3	-0.867475	10.0712	0.0116753	0.1698	3.AD/2.MCI	Neural Stem
ENSG00000181449	SOX2	1.93151	4.07253	0.0117406	0.1699	1.YC/0.HA	Immature
ENSG00000121966	CXCR4	-1.75365	2.36908	0.0122702	0.1762	2.MCI/0.HA	Neural Stem
ENSG00000112038	OPRM1	-2.04504	1.31022	0.012258	0.1762	2.MCI/1.YC	Neural Stem
ENSG00000128683	GAD1	2.31476	5.9237	0.0122142	0.1762	2.MCI/0.HA	Neuroblast
ENSG00000121966	CXCR4	-1.57328	2.37956	0.0123528	0.1769	3.AD/0.HA	Neural Stem
ENSG00000163513	TGFBR2	-7.14752	3.64177	0.0124574	0.1779	3.AD/2.MCI	Immature
ENSG00000151322	NPAS3	-1.28165	9.62602	0.0126864	0.1808	3.AD/1.YC	Immature
ENSG00000113494	PRLR	-4.77316	1.90197	0.0128088	0.182	3.AD/2.MCI	Neural Stem
ENSG00000160789	LMNA	-6.60268	2.94378	0.0128749	0.1825	3.AD/0.HA	Immature
ENSG00000101439	CST3	-0.947917	8.88275	0.0129232	0.1827	2.MCI/0.HA	Neural Stem
ENSG00000070831	CDC42	-1.36811	5.71044	0.0129981	0.1829	3.AD/1.YC	Immature
ENSG00000138795	LEF1	-2.01633	3.84844	0.0130026	0.1829	1.YC/0.HA	Neural Stem
ENSG00000110436	SLC1A2			0.0132516	0.1837	Diagnosis	Immature
ENSG00000124766	SOX4	-8.38547	2.90733	0.0131624	0.1837	3.AD/1.YC	Immature
ENSG00000148400	NOTCH1	-8.40101	2.91995	0.013119	0.1837	3.AD/1.YC	Immature
ENSG00000105329	TGFB1	-8.37213	2.89279	0.0132134	0.1837	3.AD/1.YC	Immature
ENSG00000205927	OLIG2	-8.4051	2.91923	0.0131214	0.1837	3.AD/1.YC	Immature
ENSG00000145242	EPHA5	1.46181	5.04281	0.0132183	0.1837	3.AD/1.YC	Neural Stem
ENSG00000064651	SLC12A2	1.01357	7.70435	0.0133177	0.1842	3.AD/2.MCI	Neural Stem
ENSG00000101384	JAG1	-1.52315	5.4612	0.0133865	0.1847	1.YC/0.HA	Immature
ENSG00000176884	GRIN1	-2.02439	2.72355	0.013539	0.1863	2.MCI/1.YC	Neural Stem
ENSG00000164687	FABP5	-1.4044	4.43356	0.0136015	0.1867	3.AD/1.YC	Neural Stem
ENSG00000112038	OPRM1	-1.6406	4.61482	0.0137896	0.1879	2.MCI/1.YC	Immature
ENSG00000133216	EPHB2	1.00528	5.20911	0.0137889	0.1879	3.AD/2.MCI	Neural Stem
ENSG00000107331	ABCA2	1.03053	7.41722	0.0137785	0.1879	3.AD/2.MCI	Neural Stem
ENSG00000116106	EPHA4	-0.729937	5.89901	0.0138523	0.1883	3.AD/1.YC	Neural Stem
ENSG00000171552	BCL2L1			0.0140231	0.1889	Diagnosis	Neural Stem
ENSG00000182621	PLCB1	-0.872828	8.96863	0.0139834	0.1889	3.AD/1.YC	Neural Stem
ENSG00000111728	ST8SIA1			0.0140193	0.1889	Diagnosis	Neuroblast
ENSG00000164687	FABP5	-2.23226	6.69284	0.0140276	0.1889	1.YC/0.HA	Neuroblast
ENSG00000155368	DBI	-2.41305	4.10846	0.01414	0.1899	3.AD/1.YC	Immature
ENSG00000138685	FGF2	2.17675	3.69935	0.0142072	0.1904	1.YC/0.HA	Immature
ENSG00000171885	AQP4	-0.811688	9.18277	0.0143148	0.1914	3.AD/0.HA	Neural Stem
ENSG00000133639	BTG1			0.0144074	0.1921	Diagnosis	Immature
ENSG00000120088	CRHR1	1.95634	2.52909	0.0145574	0.1937	3.AD/2.MCI	Neural Stem
ENSG00000105894	PTN			0.0146248	0.1941	Diagnosis	Immature
ENSG00000112038	OPRM1	-3.2219	1.38838	0.0146674	0.1942	3.AD/1.YC	Neural Stem
ENSG00000134259	NGF			0.0147231	0.1944	Diagnosis	Immature
ENSG00000164600	NEUROD6	-2.26163	4.01474	0.0148644	0.1944	3.AD/1.YC	Immature
ENSG00000176165	FOXG1	-0.791766	5.31533	0.0149501	0.1944	3.AD/0.HA	Neural Stem
ENSG00000122756	CNTFR	-0.936122	4.77204	0.0148558	0.1944	3.AD/1.YC	Neural Stem
ENSG00000173511	VEGFB			0.0148079	0.1944	Diagnosis	Neuroblast
ENSG00000100285	NEFH	-3.28024	6.35437	0.014902	0.1944	3.AD/1.YC	Neuroblast
ENSG00000182220	ATP6AP2	-1.63094	6.99019	0.0149549	0.1944	3.AD/1.YC	Neuroblast
ENSG00000081479	LRP2	1.91192	7.79369	0.0149277	0.1944	3.AD/2.MCI	Neuroblast
ENSG00000141433	ADCYAP1			0.0150256	0.1948	Diagnosis	Immature
ENSG00000154928	EPHB1			0.015185	0.1953	Diagnosis	Immature
ENSG00000118432	CNR1	1.44543	5.94779	0.0151877	0.1953	1.YC/0.HA	Immature
ENSG00000141433	ADCYAP1	2.96339	1.79857	0.0151965	0.1953	1.YC/0.HA	Immature
ENSG00000182220	ATP6AP2	-2.05064	5.61056	0.015234	0.1953	3.AD/2.MCI	Immature
ENSG00000124762	CDKN1A	-1.72712	2.8849	0.0151071	0.1953	3.AD/2.MCI	Neural Stem
ENSG00000186868	MAPT	0.696878	8.37445	0.0152749	0.1954	3.AD/1.YC	Neural Stem
ENSG00000148053	NTRK2			0.0154112	0.1962	Diagnosis	Immature
ENSG00000138039	LHCGR	-1.69044	2.73224	0.0153856	0.1962	1.YC/0.HA	Neural Stem
ENSG00000160789	LMNA			0.0158202	0.201	Diagnosis	Immature
ENSG00000132326	PER2			0.0160073	0.2016	Diagnosis	Immature
ENSG00000117707	PROX1	-1.58171	7.36551	0.0159644	0.2016	1.YC/0.HA	Immature
ENSG00000080815	PSEN1	0.724164	6.41648	0.0163023	0.2016	1.YC/0.HA	Immature
ENSG00000188906	LRRK2	-1.51441	4.99072	0.0160982	0.2016	3.AD/0.HA	Immature
ENSG00000118432	CNR1	-1.36468	6.22484	0.0163969	0.2016	2.MCI/1.YC	Immature
ENSG00000198576	ARC	-2.04862	2.12954	0.0159973	0.2016	2.MCI/1.YC	Immature
ENSG00000171316	CHD7	-1.49565	6.25804	0.0162687	0.2016	3.AD/1.YC	Immature
ENSG00000128683	GAD1			0.0163642	0.2016	Diagnosis	Neural Stem
ENSG00000110436	SLC1A2	-1.63447	11.8935	0.0164034	0.2016	2.MCI/1.YC	Neural Stem
ENSG00000153094	BCL2L11	1.24991	3.58477	0.0162873	0.2016	3.AD/1.YC	Neural Stem
ENSG00000135446	CDK4	1.43043	2.97047	0.0161278	0.2016	3.AD/1.YC	Neural Stem
ENSG00000124181	PLCG1	-0.804727	5.77661	0.0162591	0.2016	3.AD/1.YC	Neural Stem
ENSG00000145242	EPHA5	1.07165	5.12459	0.0162546	0.2016	3.AD/2.MCI	Neural Stem
ENSG00000152413	HOMER1	-1.83467	7.46244	0.0163054	0.2016	2.MCI/1.YC	Neuroblast
ENSG00000172137	CALB2	2.93501	5.80322	0.0161745	0.2016	2.MCI/1.YC	Neuroblast
ENSG00000108947	EFNB3	-0.970877	3.84592	0.0164712	0.202	1.YC/0.HA	Immature
ENSG00000171791	BCL2	0.778262	6.81601	0.0166464	0.2026	1.YC/0.HA	Immature
ENSG00000118785	SPP1	-1.88185	5.7181	0.0167802	0.2026	3.AD/2.MCI	Immature
ENSG00000138696	BMPR1B	-1.68924	5.37493	0.0168077	0.2026	3.AD/2.MCI	Immature
ENSG00000133639	BTG1	-1.99877	5.62659	0.016747	0.2026	3.AD/2.MCI	Immature
ENSG00000162946	DISC1	-1.1871	6.68415	0.0167278	0.2026	1.YC/0.HA	Neural Stem
ENSG00000173406	DAB1	1.05784	6.9238	0.0167477	0.2026	3.AD/0.HA	Neural Stem
ENSG00000105810	CDK6	1.0473	6.8863	0.0167905	0.2026	3.AD/2.MCI	Neural Stem
ENSG00000102468	HTR2A	1.41848	6.05385	0.016786	0.2026	1.YC/0.HA	Neuroblast
ENSG00000205927	OLIG2	1.87516	5.92299	0.0168539	0.2027	3.AD/0.HA	Neuroblast
ENSG00000026103	FAS			0.0169894	0.2039	Diagnosis	Immature
ENSG00000121853	GHSR	-2.57703	2.32116	0.0172159	0.2053	1.YC/0.HA	Immature
ENSG00000122585	NPY	-4.46487	4.97265	0.0171536	0.2053	3.AD/0.HA	Neuroblast
ENSG00000152413	HOMER1	-1.59068	7.30193	0.0171792	0.2053	3.AD/1.YC	Neuroblast
ENSG00000168394	TAP1	1.90371	0.930792	0.0172991	0.2055	1.YC/0.HA	Immature
ENSG00000066468	FGFR2	1.55501	8.39234	0.0173038	0.2055	3.AD/2.MCI	Neuroblast
ENSG00000173406	DAB1	1.20783	10.7662	0.0173685	0.2058	3.AD/1.YC	Immature
ENSG00000131095	GFAP	-1.72568	8.62444	0.0174638	0.2065	2.MCI/0.HA	Neuroblast
ENSG00000182220	ATP6AP2	-1.00263	4.95777	0.0175556	0.2071	3.AD/1.YC	Neural Stem
ENSG00000171532	NEUROD2			0.017737	0.208	Diagnosis	Immature
ENSG00000112242	E2F3	-0.804	5.5119	0.0177269	0.208	3.AD/1.YC	Neural Stem
ENSG00000136535	TBR1	-1.66943	5.71337	0.0176658	0.208	2.MCI/1.YC	Neuroblast
ENSG00000112333	NR2E1	1.25078	3.99172	0.0178278	0.2083	1.YC/0.HA	Neural Stem
ENSG00000171094	ALK			0.0178358	0.2083	Diagnosis	Neuroblast
ENSG00000151623	NR3C2	0.967341	9.35869	0.0179412	0.2091	3.AD/0.HA	Immature
ENSG00000120907	ADRA1A			0.0181556	0.2111	Diagnosis	Neuroblast
ENSG00000102468	HTR2A	1.52857	5.20279	0.0182272	0.2115	1.YC/0.HA	Immature
ENSG00000154764	WNT7A			0.0183201	0.2122	Diagnosis	Immature
ENSG00000113578	FGF1	0.739854	7.3516	0.0184775	0.2135	3.AD/1.YC	Neural Stem
ENSG00000118971	CCND2	-1.44923	4.36771	0.0185295	0.2137	2.MCI/1.YC	Neural Stem
ENSG00000068078	FGFR3	1.08219	6.98826	0.0187315	0.2156	1.YC/0.HA	Neural Stem
ENSG00000124181	PLCG1	0.880565	3.74729	0.018985	0.2172	1.YC/0.HA	Immature
ENSG00000067182	TNFRSF1A	-8.35929	2.88297	0.0189221	0.2172	3.AD/1.YC	Immature
ENSG00000110092	CCND1	-2.87027	2.19138	0.0189875	0.2172	2.MCI/0.HA	Neural Stem
ENSG00000167552	TUBA1A	-1.20649	6.11425	0.0191023	0.2174	3.AD/0.HA	Immature
ENSG00000030582	GRN	-6.69054	3.02056	0.0192789	0.2174	3.AD/0.HA	Immature
ENSG00000106571	GLI3	-1.81722	4.47516	0.0191415	0.2174	3.AD/1.YC	Immature
ENSG00000173511	VEGFB	-8.26538	2.80855	0.0192786	0.2174	3.AD/1.YC	Immature
ENSG00000058335	RASGRF1	-1.18851	5.96629	0.0191651	0.2174	3.AD/1.YC	Immature
ENSG00000030582	GRN	-8.28894	2.8273	0.0191851	0.2174	3.AD/1.YC	Immature
ENSG00000144476	ACKR3			0.0192413	0.2174	Diagnosis	Neural Stem
ENSG00000110092	CCND1	1.98422	1.4148	0.0194247	0.2186	1.YC/0.HA	Immature
ENSG00000171867	PRNP	-1.31312	6.5458	0.0195972	0.2197	3.AD/1.YC	Immature
ENSG00000176165	FOXG1	-1.368	6.03627	0.0196002	0.2197	2.MCI/1.YC	Neural Stem
ENSG00000169896	ITGAM			0.0199465	0.2232	Diagnosis	Neural Stem
ENSG00000154928	EPHB1	-1.41894	6.15486	0.0200411	0.2233	2.MCI/1.YC	Immature
ENSG00000091136	LAMB1	-5.08795	5.20839	0.0200076	0.2233	3.AD/1.YC	Neuroblast
ENSG00000136869	TLR4	-6.82494	3.39576	0.0200964	0.2235	3.AD/2.MCI	Immature
ENSG00000151090	THRB	-1.17263	7.64136	0.0202692	0.2246	3.AD/0.HA	Immature
ENSG00000167720	SRR	1.25205	3.51749	0.0203085	0.2246	2.MCI/0.HA	Neural Stem
ENSG00000155368	DBI	-1.07058	6.41993	0.0202674	0.2246	3.AD/0.HA	Neural Stem
ENSG00000155368	DBI	-2.33498	4.25165	0.0205593	0.2267	3.AD/0.HA	Immature
ENSG00000168959	GRM5	1.2256	5.04049	0.0205838	0.2267	3.AD/2.MCI	Neural Stem
ENSG00000171552	BCL2L1	0.742583	6.44552	0.0207074	0.2276	3.AD/2.MCI	Neural Stem
ENSG00000105894	PTN	2.15642	5.85108	0.0208414	0.2286	1.YC/0.HA	Immature
ENSG00000022355	GABRA1	2.28024	3.58144	0.0208768	0.2286	1.YC/0.HA	Neural Stem
ENSG00000066468	FGFR2	2.03873	5.68052	0.0212169	0.2319	1.YC/0.HA	Immature
ENSG00000145335	SNCA	0.725	6.45299	0.0213513	0.2329	3.AD/2.MCI	Neural Stem
ENSG00000151790	TDO2	-1.1642	5.07035	0.0214748	0.2336	2.MCI/0.HA	Immature
ENSG00000113140	SPARC			0.0214966	0.2336	Diagnosis	Neuroblast
ENSG00000188906	LRRK2			0.0220232	0.2356	Diagnosis	Immature
ENSG00000087088	BAX	-6.27023	2.70162	0.021974	0.2356	3.AD/0.HA	Immature
ENSG00000066468	FGFR2	-1.75873	6.09727	0.0218065	0.2356	2.MCI/1.YC	Immature
ENSG00000113578	FGF1	-2.80767	4.5255	0.0218422	0.2356	3.AD/1.YC	Immature
ENSG00000142208	AKT1	-1.1064	3.28955	0.0217261	0.2356	2.MCI/0.HA	Neural Stem
ENSG00000110092	CCND1	-1.46097	2.35105	0.0220388	0.2356	3.AD/0.HA	Neural Stem
ENSG00000163513	TGFBR2	2.92675	5.14807	0.0220596	0.2356	2.MCI/1.YC	Neural Stem
ENSG00000171885	AQP4	-1.63965	7.56603	0.0220305	0.2356	2.MCI/0.HA	Neuroblast
ENSG00000131437	KIF3A	-1.62581	7.75683	0.0220086	0.2356	3.AD/0.HA	Neuroblast
ENSG00000068078	FGFR3	2.16526	3.33952	0.0223086	0.2378	1.YC/0.HA	Immature
ENSG00000113494	PRLR	-2.97726	5.87289	0.0224175	0.2385	2.MCI/0.HA	Neuroblast
ENSG00000205927	OLIG2	2.64053	5.8519	0.0225218	0.2392	3.AD/1.YC	Neuroblast
ENSG00000100285	NEFH	2.84885	2.25947	0.0227777	0.2414	1.YC/0.HA	Neural Stem
ENSG00000154928	EPHB1	0.73639	6.21416	0.0229824	0.2428	1.YC/0.HA	Immature
ENSG00000188906	LRRK2			0.0229981	0.2428	Diagnosis	Neural Stem
ENSG00000152413	HOMER1	-1.2583	7.60352	0.0231219	0.2437	2.MCI/1.YC	Immature
ENSG00000142949	PTPRF	-1.53201	4.98672	0.0233049	0.2452	3.AD/1.YC	Immature
ENSG00000171552	BCL2L1	0.809774	4.99244	0.0236816	0.2469	1.YC/0.HA	Immature
ENSG00000117480	FAAH	-2.4176	3.51487	0.0235842	0.2469	3.AD/0.HA	Immature
ENSG00000151623	NR3C2	1.16012	9.43862	0.0237167	0.2469	3.AD/1.YC	Immature
ENSG00000105894	PTN	0.908007	8.74615	0.0235411	0.2469	1.YC/0.HA	Neural Stem
ENSG00000125968	ID1	-1.55162	4.60593	0.0236316	0.2469	1.YC/0.HA	Neural Stem
ENSG00000100285	NEFH	-2.58472	2.41435	0.0237353	0.2469	3.AD/1.YC	Neural Stem
ENSG00000136238	RAC1	-1.39489	6.24031	0.0237968	0.2471	3.AD/1.YC	Immature
ENSG00000133639	BTG1	-1.39644	4.57782	0.0243066	0.2519	1.YC/0.HA	Neural Stem
ENSG00000138039	LHCGR	2.83649	3.06297	0.0243744	0.2522	2.MCI/1.YC	Neural Stem
ENSG00000074181	NOTCH3	1.55887	1.16115	0.024563	0.2533	1.YC/0.HA	Immature
ENSG00000133639	BTG1			0.0245757	0.2533	Diagnosis	Neuroblast
ENSG00000171094	ALK	-1.59352	5.14949	0.024897	0.2562	2.MCI/1.YC	Immature
ENSG00000155368	DBI	-1.03423	6.45604	0.0250273	0.257	2.MCI/0.HA	Neural Stem
ENSG00000121769	FABP3	-0.994734	3.75554	0.0257842	0.2572	1.YC/0.HA	Immature
ENSG00000162946	DISC1	0.810816	6.32245	0.025205	0.2572	1.YC/0.HA	Immature
ENSG00000091831	ESR1	-1.10409	4.2655	0.0253312	0.2572	2.MCI/0.HA	Immature
ENSG00000174775	HRAS	-6.68829	3.00354	0.0256371	0.2572	3.AD/0.HA	Immature
ENSG00000113578	FGF1	-1.53881	4.47058	0.0257048	0.2572	2.MCI/1.YC	Immature
ENSG00000138685	FGF2	-7.00674	3.58329	0.0255539	0.2572	3.AD/2.MCI	Immature
ENSG00000105894	PTN	-7.16007	3.79186	0.0253834	0.2572	3.AD/2.MCI	Immature
ENSG00000106018	VIPR2	-6.25591	3.01089	0.0256913	0.2572	3.AD/2.MCI	Immature
ENSG00000105329	TGFB1	-6.0175	2.89017	0.0254547	0.2572	3.AD/2.MCI	Immature
ENSG00000124762	CDKN1A			0.025693	0.2572	Diagnosis	Neural Stem
ENSG00000006128	TAC1	2.73258	1.86821	0.0251407	0.2572	1.YC/0.HA	Neural Stem
ENSG00000134259	NGF	4.34225	2.67068	0.0256566	0.2572	2.MCI/1.YC	Neural Stem
ENSG00000167720	SRR	0.944572	3.89414	0.0256146	0.2572	3.AD/1.YC	Neural Stem
ENSG00000164600	NEUROD6			0.0258473	0.2572	Diagnosis	Neuroblast
ENSG00000132386	SERPINF1	-2.34114	6.12927	0.0252419	0.2572	1.YC/0.HA	Neuroblast
ENSG00000128564	VGF	-5.40564	5.35635	0.025867	0.2572	3.AD/1.YC	Neuroblast
ENSG00000164687	FABP5	-2.39313	6.6323	0.0255439	0.2572	3.AD/2.MCI	Neuroblast
ENSG00000165795	NDRG2	1.41449	7.86741	0.0257318	0.2572	3.AD/2.MCI	Neuroblast
ENSG00000118785	SPP1	-1.22938	7.91669	0.0261682	0.2597	2.MCI/0.HA	Neural Stem
ENSG00000174775	HRAS			0.0262733	0.2603	Diagnosis	Immature
ENSG00000113758	DBN1	-1.05957	3.09883	0.0263618	0.2607	3.AD/1.YC	Neural Stem
ENSG00000176749	CDK5R1	-1.69968	2.76464	0.0266	0.2626	2.MCI/1.YC	Neural Stem
ENSG00000152413	HOMER1			0.0269146	0.2648	Diagnosis	Immature
ENSG00000125378	BMP4	3.7611	1.84739	0.0269098	0.2648	2.MCI/1.YC	Neural Stem
ENSG00000176165	FOXG1			0.0270335	0.2655	Diagnosis	Neuroblast
ENSG00000172137	CALB2			0.02721	0.2656	Diagnosis	Immature
ENSG00000173404	INSM1	-1.31677	0.652605	0.0272045	0.2656	1.YC/0.HA	Immature
ENSG00000152413	HOMER1	-1.17155	7.65951	0.0272694	0.2656	3.AD/1.YC	Immature
ENSG00000064651	SLC12A2	-1.11396	7.02945	0.0273011	0.2656	3.AD/1.YC	Immature
ENSG00000100097	LGALS1	-0.969846	4.73813	0.0273431	0.2656	3.AD/0.HA	Neural Stem
ENSG00000197921	HES5	-2.44372	2.71038	0.0273727	0.2656	2.MCI/1.YC	Neural Stem
ENSG00000165795	NDRG2	-0.774376	7.30418	0.0271348	0.2656	3.AD/1.YC	Neural Stem
ENSG00000117480	FAAH	-2.57802	3.38806	0.0275762	0.2662	3.AD/1.YC	Immature
ENSG00000135919	SERPINE2			0.0275363	0.2662	Diagnosis	Neural Stem
ENSG00000170214	ADRA1B			0.0275298	0.2662	Diagnosis	Neural Stem
ENSG00000134250	NOTCH2	1.44521	4.36975	0.0276514	0.2664	3.AD/0.HA	Immature
ENSG00000099860	GADD45B	-2.25855	3.8507	0.0276953	0.2664	3.AD/1.YC	Neural Stem
ENSG00000171885	AQP4	-2.54134	4.86764	0.0277974	0.2665	3.AD/0.HA	Immature
ENSG00000124766	SOX4			0.0277618	0.2665	Diagnosis	Neuroblast
ENSG00000106546	AHR	-1.19404	5.2966	0.0278749	0.2668	1.YC/0.HA	Neural Stem
ENSG00000138795	LEF1			0.0280199	0.2677	Diagnosis	Immature
ENSG00000171552	BCL2L1	-1.85822	5.07555	0.0280591	0.2677	3.AD/1.YC	Immature
ENSG00000135919	SERPINE2	2.29012	5.02503	0.0281405	0.268	1.YC/0.HA	Immature
ENSG00000112964	GHR	-1.65884	6.61066	0.0282067	0.2682	2.MCI/0.HA	Neuroblast
ENSG00000171316	CHD7			0.0285917	0.2688	Diagnosis	Immature
ENSG00000128683	GAD1	0.987218	5.40725	0.0290151	0.2688	1.YC/0.HA	Immature
ENSG00000105329	TGFB1	1.3422	2.48239	0.029036	0.2688	1.YC/0.HA	Immature
ENSG00000169562	GJB1	-1.8934	1.42146	0.0289849	0.2688	2.MCI/1.YC	Immature
ENSG00000155511	GRIA1	1.11051	10.3994	0.0285212	0.2688	3.AD/1.YC	Immature
ENSG00000122641	INHBA	-7.90643	2.50035	0.0288844	0.2688	3.AD/1.YC	Immature
ENSG00000170345	FOS	-7.86298	2.46793	0.028992	0.2688	3.AD/1.YC	Immature
ENSG00000141433	ADCYAP1	-7.94798	2.54967	0.0287299	0.2688	3.AD/1.YC	Immature
ENSG00000101384	JAG1	1.53747	5.26125	0.0285724	0.2688	3.AD/1.YC	Immature
ENSG00000152822	GRM1	1.13735	9.92162	0.0284996	0.2688	3.AD/2.MCI	Immature
ENSG00000072864	NDE1			0.0287085	0.2688	Diagnosis	Neural Stem
ENSG00000078725	BRINP1	-0.806221	7.41727	0.0288207	0.2688	3.AD/1.YC	Neural Stem
ENSG00000101439	CST3	-1.76646	8.96687	0.0290041	0.2688	1.YC/0.HA	Neuroblast
ENSG00000173511	VEGFB	-2.63133	5.65197	0.0287434	0.2688	2.MCI/0.HA	Neuroblast
ENSG00000273079	GRIN2B	1.26174	8.70905	0.0285198	0.2688	3.AD/0.HA	Neuroblast
ENSG00000128564	VGF	-1.49319	5.62846	0.0285773	0.2688	2.MCI/1.YC	Neuroblast
ENSG00000125266	EFNB2	1.0816	4.77281	0.0291929	0.2698	1.YC/0.HA	Neural Stem
ENSG00000116678	LEPR			0.0298297	0.2703	Diagnosis	Immature
ENSG00000121853	GHSR			0.029294	0.2703	Diagnosis	Immature
ENSG00000120738	EGR1	1.35452	2.96364	0.0296307	0.2703	2.MCI/0.HA	Immature
ENSG00000134363	FST	3.11753	2.76336	0.0296826	0.2703	2.MCI/1.YC	Immature
ENSG00000127152	BCL11B	1.43916	7.52321	0.0295923	0.2703	2.MCI/1.YC	Immature
ENSG00000157240	FZD1	-2.39005	1.88298	0.0297345	0.2703	2.MCI/1.YC	Neural Stem
ENSG00000173805	HAP1	1.66365	4.42835	0.0294252	0.2703	2.MCI/1.YC	Neural Stem
ENSG00000198121	LPAR1	0.703415	8.4197	0.0297161	0.2703	3.AD/1.YC	Neural Stem
ENSG00000166949	SMAD3	-1.01417	6.39577	0.0294099	0.2703	3.AD/2.MCI	Neural Stem
ENSG00000166949	SMAD3	-1.53367	6.02497	0.0297782	0.2703	2.MCI/1.YC	Neuroblast
ENSG00000122585	NPY	-4.9999	5.79382	0.0298045	0.2703	3.AD/2.MCI	Neuroblast
ENSG00000091136	LAMB1	-4.29939	5.53955	0.0295699	0.2703	3.AD/2.MCI	Neuroblast
ENSG00000197921	HES5	-6.48622	0.873631	0.0300961	0.271	2.MCI/1.YC	Immature
ENSG00000106571	GLI3			0.0300717	0.271	Diagnosis	Neural Stem
ENSG00000159388	BTG2	-2.51337	5.83184	0.0300711	0.271	1.YC/0.HA	Neural Stem
ENSG00000136869	TLR4	-0.807452	6.3607	0.0300173	0.271	3.AD/1.YC	Neural Stem
ENSG00000130203	APOE	-1.7727	5.23786	0.0303597	0.2712	3.AD/2.MCI	Immature
ENSG00000099860	GADD45B			0.0302801	0.2712	Diagnosis	Neural Stem
ENSG00000091136	LAMB1	-1.72376	4.26148	0.0302543	0.2712	1.YC/0.HA	Neural Stem
ENSG00000170345	FOS	-2.32269	6.60913	0.0303049	0.2712	1.YC/0.HA	Neural Stem
ENSG00000102755	FLT1	-2.04853	6.07102	0.0301853	0.2712	3.AD/0.HA	Neuroblast
ENSG00000112964	GHR	-1.08707	5.37617	0.0304738	0.2718	2.MCI/0.HA	Immature
ENSG00000121769	FABP3	-2.69515	5.3545	0.0305866	0.2724	3.AD/0.HA	Neuroblast
ENSG00000100285	NEFH			0.0307231	0.2732	Diagnosis	Neural Stem
ENSG00000171552	BCL2L1	0.701031	6.44892	0.0311276	0.2763	3.AD/0.HA	Neural Stem
ENSG00000118785	SPP1	-1.78957	7.96966	0.0312913	0.2773	1.YC/0.HA	Neural Stem
ENSG00000101384	JAG1			0.0315189	0.2776	Diagnosis	Immature
ENSG00000171094	ALK	1.22369	4.99007	0.0315654	0.2776	1.YC/0.HA	Immature
ENSG00000118971	CCND2	-2.12084	4.61812	0.0315308	0.2776	3.AD/2.MCI	Immature
ENSG00000125285	SOX21	1.42623	2.87484	0.0314861	0.2776	1.YC/0.HA	Neural Stem
ENSG00000100097	LGALS1	-1.52662	6.80491	0.031441	0.2776	3.AD/0.HA	Neuroblast
ENSG00000101384	JAG1	1.55153	5.60108	0.0321123	0.2812	2.MCI/1.YC	Immature
ENSG00000169083	AR			0.0320288	0.2812	Diagnosis	Neural Stem
ENSG00000113140	SPARC	-1.99797	6.57597	0.0321263	0.2812	1.YC/0.HA	Neuroblast
ENSG00000181449	SOX2	-6.69334	2.95548	0.0322997	0.2823	3.AD/0.HA	Immature
ENSG00000110092	CCND1	2.10143	1.2116	0.0327221	0.2855	3.AD/1.YC	Neural Stem
ENSG00000166949	SMAD3	1.60735	6.32066	0.0327984	0.2857	3.AD/2.MCI	Neuroblast
ENSG00000128564	VGF	-6.86988	3.46726	0.0329818	0.2865	3.AD/2.MCI	Immature
ENSG00000135919	SERPINE2	-0.944267	6.79525	0.032978	0.2865	3.AD/2.MCI	Neural Stem
ENSG00000127152	BCL11B			0.0334081	0.2888	Diagnosis	Immature
ENSG00000066468	FGFR2			0.0333678	0.2888	Diagnosis	Neural Stem
ENSG00000091136	LAMB1	-1.18772	4.25386	0.0333017	0.2888	3.AD/0.HA	Neural Stem
ENSG00000171867	PRNP			0.0335358	0.2892	Diagnosis	Neural Stem
ENSG00000164600	NEUROD6	-2.35475	6.50565	0.0335568	0.2892	3.AD/0.HA	Neuroblast
ENSG00000125740	FOSB	-5.54888	1.55941	0.0337128	0.29	3.AD/0.HA	Neural Stem
ENSG00000124140	SLC12A5	-1.71807	2.67044	0.0337477	0.29	3.AD/1.YC	Neural Stem
ENSG00000197921	HES5	-2.23765	2.63849	0.0338254	0.2902	2.MCI/0.HA	Neural Stem
ENSG00000145335	SNCA	-0.899174	5.92978	0.0339245	0.2906	1.YC/0.HA	Neural Stem
ENSG00000066468	FGFR2			0.0341458	0.2907	Diagnosis	Immature
ENSG00000152822	GRM1	-1.12095	9.34653	0.0341154	0.2907	1.YC/0.HA	Immature
ENSG00000120738	EGR1	-2.54969	3.22439	0.0340962	0.2907	1.YC/0.HA	Neural Stem
ENSG00000117707	PROX1	0.996717	5.66176	0.0340583	0.2907	3.AD/2.MCI	Neural Stem
ENSG00000205927	OLIG2			0.034214	0.2909	Diagnosis	Immature
ENSG00000182220	ATP6AP2			0.034305	0.2912	Diagnosis	Immature
ENSG00000133794	ARNTL	-0.669294	5.31314	0.0344566	0.2921	3.AD/1.YC	Neural Stem
ENSG00000082175	PGR	-2.0759	2.46497	0.0345627	0.2925	1.YC/0.HA	Neural Stem
ENSG00000173406	DAB1			0.0349878	0.2948	Diagnosis	Immature
ENSG00000132688	NES	2.10325	2.12261	0.0349945	0.2948	3.AD/1.YC	Neural Stem
ENSG00000164687	FABP5	-1.61642	4.65069	0.034984	0.2948	3.AD/2.MCI	Neural Stem
ENSG00000091136	LAMB1	1.22594	6.49948	0.0351864	0.296	3.AD/1.YC	Immature
ENSG00000077279	DCX	-1.56326	5.04911	0.0353866	0.2972	2.MCI/1.YC	Immature
ENSG00000130368	MAS1	-1.2473	3.59351	0.035462	0.2973	1.YC/0.HA	Immature
ENSG00000138798	EGF	-5.84441	2.80395	0.0355002	0.2973	3.AD/2.MCI	Immature
ENSG00000073282	TP63	-1.36298	2.24416	0.0356637	0.2974	2.MCI/0.HA	Immature
ENSG00000127152	BCL11B	-1.5616	2.71042	0.0356525	0.2974	3.AD/0.HA	Neural Stem
ENSG00000112964	GHR	2.11379	6.09105	0.0356263	0.2974	2.MCI/1.YC	Neural Stem
ENSG00000188906	LRRK2	-0.727271	4.58472	0.0358172	0.298	3.AD/1.YC	Neural Stem
ENSG00000125740	FOSB	-3.73109	0.592865	0.0358481	0.298	3.AD/1.YC	Neural Stem
ENSG00000106546	AHR	-0.757278	5.99329	0.0361789	0.2998	1.YC/0.HA	Immature
ENSG00000151067	CACNA1C	-0.997479	9.53968	0.0361818	0.2998	2.MCI/0.HA	Immature
ENSG00000068078	FGFR3	-1.90279	3.79334	0.0362197	0.2998	2.MCI/1.YC	Immature
ENSG00000151623	NR3C2	-0.668794	8.13576	0.0362778	0.2998	3.AD/1.YC	Neural Stem
ENSG00000113532	ST8SIA4	1.09758	4.56609	0.0364104	0.3005	1.YC/0.HA	Immature
ENSG00000030582	GRN	-1.00522	3.33582	0.0365985	0.3008	3.AD/0.HA	Neural Stem
ENSG00000198576	ARC	-1.81006	1.35437	0.036609	0.3008	3.AD/1.YC	Neural Stem
ENSG00000148053	NTRK2	-0.647988	10.3435	0.0365194	0.3008	3.AD/1.YC	Neural Stem
ENSG00000112242	E2F3	0.965212	6.64069	0.0367014	0.3011	3.AD/0.HA	Immature
ENSG00000100968	NFATC4	-2.06216	1.21331	0.0369468	0.302	2.MCI/1.YC	Immature
ENSG00000121966	CXCR4			0.036972	0.302	Diagnosis	Neural Stem
ENSG00000102755	FLT1			0.0369468	0.302	Diagnosis	Neuroblast
ENSG00000064651	SLC12A2	-1.1391	6.99492	0.0371344	0.3029	2.MCI/1.YC	Immature
ENSG00000100097	LGALS1	-1.80127	6.74209	0.0372227	0.3032	1.YC/0.HA	Neuroblast
ENSG00000122585	NPY	-2.78632	4.37468	0.0373888	0.304	2.MCI/1.YC	Immature
ENSG00000176697	BDNF	1.8371	6.41902	0.0374331	0.304	2.MCI/1.YC	Immature
ENSG00000189056	RELN	2.61302	4.29138	0.0375714	0.3045	2.MCI/0.HA	Immature
ENSG00000189403	HMGB1			0.0375985	0.3045	Diagnosis	Neural Stem
ENSG00000113657	DPYSL3	-1.95261	3.96781	0.0377137	0.305	3.AD/0.HA	Immature
ENSG00000182220	ATP6AP2	-0.923822	5.19349	0.037894	0.306	2.MCI/0.HA	Neural Stem
ENSG00000006128	TAC1			0.0380231	0.3066	Diagnosis	Neuroblast
ENSG00000185920	PTCH1	-0.921597	5.67768	0.0384429	0.3095	3.AD/1.YC	Neural Stem
ENSG00000151067	CACNA1C	-0.702579	7.489	0.0386205	0.3105	3.AD/2.MCI	Neural Stem
ENSG00000101670	LIPG			0.0388693	0.3114	Diagnosis	Immature
ENSG00000164687	FABP5	-1.10698	4.73691	0.0388599	0.3114	1.YC/0.HA	Immature
ENSG00000131437	KIF3A			0.0389008	0.3114	Diagnosis	Neuroblast
ENSG00000124766	SOX4			0.0391282	0.3115	Diagnosis	Immature
ENSG00000122585	NPY			0.0390372	0.3115	Diagnosis	Immature
ENSG00000106018	VIPR2	2.30717	2.03405	0.0389728	0.3115	1.YC/0.HA	Immature
ENSG00000167552	TUBA1A	-1.4923	6.37476	0.0391254	0.3115	3.AD/2.MCI	Immature
ENSG00000117480	FAAH	1.18232	3.76573	0.0395946	0.3147	3.AD/2.MCI	Neural Stem
ENSG00000099860	GADD45B	-1.89984	4.96738	0.0400173	0.3177	2.MCI/0.HA	Neural Stem
ENSG00000182220	ATP6AP2			0.0402634	0.3187	Diagnosis	Neural Stem
ENSG00000079215	SLC1A3	0.930814	10.8405	0.0402396	0.3187	1.YC/0.HA	Neural Stem
ENSG00000168036	CTNNB1	-0.56394	6.55964	0.040461	0.3198	3.AD/1.YC	Neural Stem
ENSG00000087245	MMP2			0.0405538	0.3201	Diagnosis	Neural Stem
ENSG00000104327	CALB1	-1.51539	1.86351	0.0406872	0.3202	3.AD/1.YC	Neural Stem
ENSG00000128564	VGF	-1.41305	5.68166	0.0407301	0.3202	2.MCI/0.HA	Neuroblast
ENSG00000165795	NDRG2	1.40757	7.67998	0.0406161	0.3202	3.AD/1.YC	Neuroblast
ENSG00000017427	IGF1	-2.98603	4.05629	0.0409917	0.3218	3.AD/2.MCI	Immature
ENSG00000106018	VIPR2	-8.10881	2.68729	0.0411498	0.3226	3.AD/1.YC	Immature
ENSG00000100285	NEFH			0.0413198	0.3234	Diagnosis	Immature
ENSG00000122641	INHBA			0.0413988	0.3236	Diagnosis	Immature
ENSG00000007062	PROM1	-8.0686	2.64906	0.0415176	0.3241	3.AD/1.YC	Immature
ENSG00000272398	CD24	1.66508	4.99168	0.0418483	0.3258	3.AD/1.YC	Immature
ENSG00000087088	BAX	-8.00937	2.59902	0.0418228	0.3258	3.AD/1.YC	Immature
ENSG00000125740	FOSB			0.0419525	0.3261	Diagnosis	Neural Stem
ENSG00000173511	VEGFB	-6.23792	2.65405	0.042228	0.3271	3.AD/0.HA	Immature
ENSG00000089250	NOS1	-1.08095	3.87826	0.042253	0.3271	2.MCI/1.YC	Immature
ENSG00000170214	ADRA1B	-1.53554	4.11044	0.0421967	0.3271	2.MCI/1.YC	Neural Stem
ENSG00000101670	LIPG	2.21677	2.11653	0.0423414	0.3273	2.MCI/1.YC	Immature
ENSG00000113140	SPARC	-6.72109	3.43864	0.04277	0.3284	3.AD/2.MCI	Immature
ENSG00000174775	HRAS	-7.00938	3.69998	0.0425836	0.3284	3.AD/2.MCI	Immature
ENSG00000113368	LMNB1	1.36933	2.34336	0.0427149	0.3284	1.YC/0.HA	Neural Stem
ENSG00000138795	LEF1	2.5091	3.70739	0.0426095	0.3284	2.MCI/1.YC	Neural Stem
ENSG00000102755	FLT1	-2.838	5.92991	0.0426843	0.3284	1.YC/0.HA	Neuroblast
ENSG00000100697	DICER1	-0.965283	7.0603	0.0429007	0.3289	3.AD/1.YC	Immature
ENSG00000113140	SPARC	-7.05845	3.29353	0.0434338	0.3312	3.AD/0.HA	Immature
ENSG00000173511	VEGFB			0.0433085	0.3312	Diagnosis	Neural Stem
ENSG00000064651	SLC12A2	0.884452	7.73384	0.0434302	0.3312	3.AD/0.HA	Neural Stem
ENSG00000160307	S100B	1.37493	8.27603	0.0433	0.3312	3.AD/2.MCI	Neuroblast
ENSG00000120907	ADRA1A	1.55772	6.89412	0.0437231	0.333	2.MCI/0.HA	Neuroblast
ENSG00000148180	GSN	-1.55357	4.93702	0.0438007	0.3331	3.AD/2.MCI	Immature
ENSG00000113532	ST8SIA4	-1.47044	4.72097	0.0440005	0.3342	2.MCI/1.YC	Immature
ENSG00000113657	DPYSL3	-1.38945	4.33088	0.0442659	0.3342	2.MCI/1.YC	Immature
ENSG00000134259	NGF	-7.78647	2.41716	0.04433	0.3342	3.AD/1.YC	Immature
ENSG00000135919	SERPINE2	-0.71017	6.64546	0.044246	0.3342	3.AD/0.HA	Neural Stem
ENSG00000186868	MAPT	0.477944	8.39246	0.0443524	0.3342	3.AD/0.HA	Neural Stem
ENSG00000118971	CCND2	-0.786132	4.62646	0.0442249	0.3342	3.AD/1.YC	Neural Stem
ENSG00000081479	LRP2			0.0443377	0.3342	Diagnosis	Neuroblast
ENSG00000198576	ARC	-7.73322	2.38928	0.0444839	0.3347	3.AD/1.YC	Immature
ENSG00000167552	TUBA1A			0.0448109	0.3349	Diagnosis	Immature
ENSG00000173406	DAB1	-1.11883	10.6632	0.0448073	0.3349	1.YC/0.HA	Immature
ENSG00000165806	CASP7	-7.70955	2.32828	0.0447723	0.3349	3.AD/1.YC	Immature
ENSG00000135919	SERPINE2	0.983901	7.3575	0.0447215	0.3349	1.YC/0.HA	Neural Stem
ENSG00000136869	TLR4	-0.819158	6.50488	0.0448109	0.3349	3.AD/2.MCI	Neural Stem
ENSG00000107562	CXCL12	-2.26679	3.65544	0.0449789	0.3357	1.YC/0.HA	Neural Stem
ENSG00000112715	VEGFA	1.57935	2.99235	0.0453383	0.3358	1.YC/0.HA	Immature
ENSG00000171476	HOPX	-0.920239	4.91325	0.0453455	0.3358	3.AD/0.HA	Neural Stem
ENSG00000171867	PRNP	-0.842085	6.52683	0.0451626	0.3358	2.MCI/1.YC	Neural Stem
ENSG00000077279	DCX	-1.95697	1.53828	0.0450492	0.3358	2.MCI/1.YC	Neural Stem
ENSG00000176749	CDK5R1	-1.10497	2.90383	0.0451198	0.3358	3.AD/1.YC	Neural Stem
ENSG00000127152	BCL11B	-1.73808	2.7538	0.045295	0.3358	3.AD/2.MCI	Neural Stem
ENSG00000126351	THRA			0.0455812	0.3367	Diagnosis	Immature
ENSG00000115355	CCDC88A	0.600128	9.15289	0.0455297	0.3367	3.AD/1.YC	Neural Stem
ENSG00000154928	EPHB1	-0.737635	7.37477	0.0456435	0.3367	3.AD/2.MCI	Neural Stem
ENSG00000137710	RDX	-1.03384	6.50466	0.0457529	0.337	3.AD/1.YC	Immature
ENSG00000176697	BDNF			0.0460748	0.3385	Diagnosis	Immature
ENSG00000168394	TAP1	-1.45869	2.7253	0.0460236	0.3385	3.AD/0.HA	Neural Stem
ENSG00000173406	DAB1	-0.884926	10.6851	0.0462744	0.3395	2.MCI/0.HA	Immature
ENSG00000074181	NOTCH3	-1.39473	1.47117	0.0464087	0.3401	2.MCI/1.YC	Immature
ENSG00000115194	SLC30A3	-0.848258	4.84283	0.046766	0.3423	1.YC/0.HA	Immature
ENSG00000149294	NCAM1	0.470268	10.1611	0.0468916	0.3427	3.AD/0.HA	Neural Stem
ENSG00000102003	SYP	-1.46956	6.66729	0.046971	0.3429	3.AD/1.YC	Neuroblast
ENSG00000151623	NR3C2			0.047216	0.3433	Diagnosis	Immature
ENSG00000124140	SLC12A5	-1.64368	2.72684	0.0471552	0.3433	2.MCI/1.YC	Neural Stem
ENSG00000081479	LRP2	-1.49869	7.29575	0.0471845	0.3433	2.MCI/1.YC	Neuroblast
ENSG00000182621	PLCB1	0.872052	9.0225	0.0475906	0.3456	1.YC/0.HA	Neural Stem
ENSG00000169083	AR	-2.42653	3.26774	0.0481277	0.349	3.AD/1.YC	Immature
ENSG00000170214	ADRA1B	-0.90594	5.6883	0.0484414	0.35	2.MCI/0.HA	Immature
ENSG00000164434	FABP7			0.0484201	0.35	Diagnosis	Neural Stem
ENSG00000134250	NOTCH2			0.0483225	0.35	Diagnosis	Neuroblast
ENSG00000006128	TAC1			0.0488778	0.3527	Diagnosis	Immature
ENSG00000182621	PLCB1	-0.797603	9.09023	0.0489991	0.3531	3.AD/2.MCI	Neural Stem
ENSG00000147246	HTR2C	2.51904	4.66608	0.0491677	0.3537	1.YC/0.HA	Immature
ENSG00000058335	RASGRF1	1.09641	6.79237	0.0492217	0.3537	1.YC/0.HA	Neuroblast
ENSG00000171094	ALK	2.47235	6.02776	0.0492758	0.3537	2.MCI/1.YC	Neuroblast
ENSG00000152822	GRM1	0.76299	9.97842	0.0494719	0.3538	3.AD/0.HA	Immature
ENSG00000138336	TET1	-1.44	4.52173	0.0494355	0.3538	3.AD/1.YC	Immature
ENSG00000187323	DCC	-1.3949	9.37021	0.0494295	0.3538	2.MCI/0.HA	Neuroblast
ENSG00000058335	RASGRF1	1.29509	4.22839	0.0496221	0.3544	1.YC/0.HA	Neural Stem
ENSG00000110436	SLC1A2	-1.34246	8.07162	0.0496946	0.3545	3.AD/1.YC	Neuroblast
ENSG00000165806	CASP7	-5.66578	2.66909	0.0499443	0.3554	3.AD/2.MCI	Immature
ENSG00000145335	SNCA			0.0499189	0.3554	Diagnosis	Neuroblast
ENSG00000188906	LRRK2	-0.760087	4.69017	0.0500408	0.3556	3.AD/2.MCI	Neural Stem
ENSG00000079215	SLC1A3	-0.93849	10.8262	0.0501405	0.3559	2.MCI/1.YC	Neural Stem
ENSG00000113657	DPYSL3			0.050221	0.356	Diagnosis	Immature
ENSG00000137710	RDX	0.650072	8.18297	0.0503103	0.3562	3.AD/1.YC	Neural Stem
ENSG00000117707	PROX1	0.970563	5.70928	0.0505113	0.3567	3.AD/1.YC	Neural Stem
ENSG00000133794	ARNTL	1.49413	6.04361	0.0504689	0.3567	3.AD/0.HA	Neuroblast
ENSG00000171532	NEUROD2	1.47218	4.52907	0.0507163	0.3577	3.AD/1.YC	Immature
ENSG00000101384	JAG1	-1.12817	3.1752	0.0508295	0.358	3.AD/2.MCI	Neural Stem
ENSG00000145242	EPHA5	0.916992	8.50148	0.0512013	0.3589	2.MCI/0.HA	Immature
ENSG00000100285	NEFH	-6.17954	2.59837	0.0510669	0.3589	3.AD/0.HA	Immature
ENSG00000124762	CDKN1A	-2.67191	3.24346	0.0511897	0.3589	1.YC/0.HA	Neural Stem
ENSG00000173511	VEGFB	-1.14283	4.08519	0.0511183	0.3589	2.MCI/1.YC	Neural Stem
ENSG00000171094	ALK	-2.96431	4.01894	0.0514413	0.3596	3.AD/2.MCI	Immature
ENSG00000101384	JAG1	-1.32465	3.27849	0.0514254	0.3596	3.AD/0.HA	Neural Stem
ENSG00000128602	SMO	-6.18892	3.04632	0.0517775	0.3605	3.AD/2.MCI	Immature
ENSG00000030582	GRN	-6.3466	3.20205	0.05182	0.3605	3.AD/2.MCI	Immature
ENSG00000145335	SNCA	0.55485	6.5032	0.0516512	0.3605	3.AD/0.HA	Neural Stem
ENSG00000134259	NGF	3.19704	2.62807	0.0518122	0.3605	3.AD/1.YC	Neural Stem
ENSG00000130203	APOE	-1.38636	8.24303	0.0522183	0.3628	2.MCI/0.HA	Neuroblast
ENSG00000112964	GHR			0.0524112	0.3631	Diagnosis	Immature
ENSG00000169896	ITGAM	-3.14374	2.17725	0.0524469	0.3631	2.MCI/0.HA	Neural Stem
ENSG00000176884	GRIN1	0.95832	6.64006	0.0524072	0.3631	1.YC/0.HA	Neuroblast
ENSG00000087088	BAX			0.0526221	0.3638	Diagnosis	Immature
ENSG00000151790	TDO2	1.27471	5.03516	0.0527429	0.3642	3.AD/2.MCI	Immature
ENSG00000157540	DYRK1A	0.688329	8.31186	0.0529226	0.3649	3.AD/0.HA	Immature
ENSG00000173406	DAB1	1.02261	10.7905	0.0529737	0.3649	3.AD/2.MCI	Immature
ENSG00000148400	NOTCH1	-1.24414	2.85505	0.0531958	0.3651	2.MCI/1.YC	Immature
ENSG00000176884	GRIN1			0.0531533	0.3651	Diagnosis	Neural Stem
ENSG00000166949	SMAD3	-0.568502	6.15892	0.0530804	0.3651	3.AD/0.HA	Neural Stem
ENSG00000176697	BDNF	1.2758	5.63472	0.0534298	0.3655	3.AD/1.YC	Immature
ENSG00000164687	FABP5			0.0534436	0.3655	Diagnosis	Neural Stem
ENSG00000272398	CD24	-1.88847	2.86621	0.053385	0.3655	2.MCI/0.HA	Neural Stem
ENSG00000152822	GRM1			0.0537467	0.3662	Diagnosis	Immature
ENSG00000105810	CDK6	0.705792	6.98539	0.0536738	0.3662	3.AD/0.HA	Neural Stem
ENSG00000080815	PSEN1	0.594217	7.64718	0.0536611	0.3662	3.AD/1.YC	Neural Stem
ENSG00000102003	SYP	-1.44381	6.83432	0.0538815	0.3667	3.AD/0.HA	Neuroblast
ENSG00000030582	GRN			0.054123	0.3674	Diagnosis	Immature
ENSG00000137752	CASP1	-2.91089	1.179	0.0540856	0.3674	2.MCI/0.HA	Neural Stem
ENSG00000175344	CHRNA7	0.930215	2.5414	0.0542246	0.3677	3.AD/0.HA	Neural Stem
ENSG00000100097	LGALS1	-6.5132	2.87353	0.0545555	0.3695	3.AD/0.HA	Immature
ENSG00000169896	ITGAM	-2.05107	2.39104	0.0547209	0.3702	3.AD/0.HA	Neural Stem
ENSG00000137462	TLR2	-2.72596	4.59249	0.0548676	0.3703	1.YC/0.HA	Neural Stem
ENSG00000189403	HMGB1	0.932273	8.82893	0.0548476	0.3703	2.MCI/0.HA	Neural Stem
ENSG00000113580	NR3C1	0.777198	7.39357	0.0550193	0.3706	1.YC/0.HA	Immature
ENSG00000072864	NDE1	1.84975	3.68316	0.0550573	0.3706	1.YC/0.HA	Immature
ENSG00000080815	PSEN1			0.0552153	0.371	Diagnosis	Immature
ENSG00000138685	FGF2			0.0552386	0.371	Diagnosis	Neural Stem
ENSG00000120907	ADRA1A	0.693222	7.07919	0.0554016	0.3712	1.YC/0.HA	Neural Stem
ENSG00000128683	GAD1	-2.48701	5.79973	0.0553849	0.3712	3.AD/1.YC	Neuroblast
ENSG00000122641	INHBA	-6.83836	3.51955	0.0557975	0.3727	3.AD/2.MCI	Immature
ENSG00000176884	GRIN1	1.60378	2.72511	0.0558325	0.3727	1.YC/0.HA	Neural Stem
ENSG00000110436	SLC1A2	-0.601329	10.6712	0.0557884	0.3727	3.AD/0.HA	Neural Stem
ENSG00000132386	SERPINF1			0.0560452	0.3728	Diagnosis	Immature
ENSG00000162946	DISC1	0.857172	6.32613	0.0559163	0.3728	3.AD/0.HA	Immature
ENSG00000163513	TGFBR2			0.0560455	0.3728	Diagnosis	Neural Stem
ENSG00000064651	SLC12A2			0.0561842	0.3729	Diagnosis	Immature
ENSG00000134982	APC	-0.586679	9.31621	0.0561164	0.3729	3.AD/0.HA	Neural Stem
ENSG00000134250	NOTCH2	-1.65669	6.28136	0.0563571	0.3736	2.MCI/0.HA	Neuroblast
ENSG00000138685	FGF2			0.0565732	0.3742	Diagnosis	Immature
ENSG00000128564	VGF	-6.33618	2.70152	0.0565869	0.3742	3.AD/0.HA	Immature
ENSG00000068078	FGFR3			0.0567215	0.3746	Diagnosis	Immature
ENSG00000134250	NOTCH2	-1.92235	5.93411	0.056778	0.3746	1.YC/0.HA	Neuroblast
ENSG00000112964	GHR			0.0568634	0.3747	Diagnosis	Neuroblast
ENSG00000107331	ABCA2	1.0057	5.5523	0.0570284	0.3754	1.YC/0.HA	Immature
ENSG00000073282	TP63			0.0574618	0.3774	Diagnosis	Neural Stem
ENSG00000111276	CDKN1B	0.789252	4.29659	0.0574087	0.3774	3.AD/1.YC	Neural Stem
ENSG00000101439	CST3			0.0576252	0.3778	Diagnosis	Immature
ENSG00000171552	BCL2L1			0.0581298	0.3778	Diagnosis	Immature
ENSG00000079215	SLC1A3	1.82026	7.2173	0.0579855	0.3778	1.YC/0.HA	Immature
ENSG00000070831	CDC42	-0.925182	5.56943	0.0579698	0.3778	3.AD/0.HA	Immature
ENSG00000164687	FABP5	-1.94086	3.735	0.058127	0.3778	3.AD/1.YC	Immature
ENSG00000124140	SLC12A5			0.057971	0.3778	Diagnosis	Neural Stem
ENSG00000164434	FABP7	-1.63981	4.6216	0.0581149	0.3778	2.MCI/1.YC	Neural Stem
ENSG00000102879	CORO1A	-2.70086	0.973411	0.0579517	0.3778	2.MCI/1.YC	Neural Stem
ENSG00000173805	HAP1	-0.978612	4.44627	0.0580349	0.3778	3.AD/2.MCI	Neural Stem
ENSG00000112964	GHR	1.36403	5.48794	0.0582264	0.378	3.AD/2.MCI	Immature
ENSG00000171532	NEUROD2	1.62349	5.05862	0.0583747	0.3785	2.MCI/1.YC	Immature
ENSG00000115353	TACR1	-1.51462	3.26798	0.0586141	0.3796	2.MCI/1.YC	Immature
ENSG00000081479	LRP2	-1.92534	3.5647	0.0588934	0.3805	2.MCI/0.HA	Immature
ENSG00000006128	TAC1	-5.54344	1.50521	0.0588664	0.3805	3.AD/2.MCI	Neural Stem
ENSG00000113140	SPARC	1.76565	6.34038	0.0589733	0.3806	3.AD/1.YC	Neuroblast
ENSG00000133639	BTG1	-0.926519	4.60957	0.0593247	0.3825	3.AD/0.HA	Neural Stem
ENSG00000157240	FZD1	1.4969	2.30722	0.059592	0.3832	2.MCI/0.HA	Immature
ENSG00000148180	GSN			0.0596441	0.3832	Diagnosis	Neural Stem
ENSG00000151090	THRB	-1.2923	7.53893	0.0595912	0.3832	2.MCI/1.YC	Neuroblast
ENSG00000163513	TGFBR2	-6.6544	2.89251	0.0601543	0.3856	3.AD/0.HA	Immature
ENSG00000149295	DRD2	-6.00656	2.49472	0.0601194	0.3856	3.AD/0.HA	Immature
ENSG00000148053	NTRK2	-0.993834	9.13429	0.060231	0.3856	2.MCI/1.YC	Immature
ENSG00000113494	PRLR	-6.27902	2.71464	0.0603696	0.3861	3.AD/0.HA	Immature
ENSG00000197921	HES5			0.0607309	0.3877	Diagnosis	Immature
ENSG00000131095	GFAP	-1.10349	9.19414	0.0607561	0.3877	2.MCI/0.HA	Neural Stem
ENSG00000125378	BMP4	2.39649	1.9181	0.0610349	0.3886	2.MCI/0.HA	Neural Stem
ENSG00000104327	CALB1	-3.34643	6.18168	0.0609626	0.3886	3.AD/2.MCI	Neuroblast
ENSG00000198576	ARC			0.0620449	0.3946	Diagnosis	Neural Stem
ENSG00000084093	REST			0.0626295	0.3948	Diagnosis	Immature
ENSG00000077279	DCX	1.33829	4.8074	0.0626752	0.3948	1.YC/0.HA	Immature
ENSG00000109320	NFKB1	0.821121	6.32501	0.0621522	0.3948	3.AD/0.HA	Immature
ENSG00000157240	FZD1	1.88138	2.28633	0.0623817	0.3948	2.MCI/1.YC	Immature
ENSG00000105835	NAMPT	-1.94181	7.21805	0.0622436	0.3948	1.YC/0.HA	Neural Stem
ENSG00000120738	EGR1	-2.05275	3.21284	0.0622901	0.3948	2.MCI/0.HA	Neural Stem
ENSG00000077782	FGFR1	-0.716161	6.22808	0.0624764	0.3948	3.AD/2.MCI	Neural Stem
ENSG00000119689	DLST	1.1148	5.37705	0.0625142	0.3948	1.YC/0.HA	Neuroblast
ENSG00000127152	BCL11B	1.19138	6.79285	0.0627056	0.3948	3.AD/0.HA	Neuroblast
ENSG00000117707	PROX1	0.90945	7.76421	0.0628761	0.3949	3.AD/2.MCI	Immature
ENSG00000169083	AR	-1.08908	3.8979	0.0628689	0.3949	1.YC/0.HA	Neural Stem
ENSG00000130368	MAS1			0.0630555	0.3951	Diagnosis	Immature
ENSG00000171316	CHD7	-1.27048	6.32882	0.0631846	0.3951	3.AD/2.MCI	Immature
ENSG00000138696	BMPR1B	-0.655821	8.77693	0.0631522	0.3951	3.AD/0.HA	Neural Stem
ENSG00000122585	NPY	-4.85354	5.1015	0.06316	0.3951	3.AD/1.YC	Neuroblast
ENSG00000102879	CORO1A	-2.7538	1.14374	0.0634726	0.396	3.AD/1.YC	Neural Stem
ENSG00000132639	SNAP25	-1.23405	9.74461	0.0633924	0.396	3.AD/0.HA	Neuroblast
ENSG00000112715	VEGFA	-0.733823	5.24492	0.0635589	0.3961	3.AD/1.YC	Neural Stem
ENSG00000006128	TAC1			0.0636598	0.3963	Diagnosis	Neural Stem
ENSG00000198121	LPAR1	1.83511	5.99549	0.064539	0.4014	1.YC/0.HA	Immature
ENSG00000100285	NEFH	1.24858	3.18666	0.064721	0.402	1.YC/0.HA	Immature
ENSG00000170214	ADRA1B	0.987024	5.6835	0.0650748	0.4025	3.AD/2.MCI	Immature
ENSG00000066468	FGFR2	0.517451	8.05247	0.064923	0.4025	3.AD/0.HA	Neural Stem
ENSG00000106571	GLI3	-0.76748	8.13231	0.0649648	0.4025	3.AD/2.MCI	Neural Stem
ENSG00000189403	HMGB1	-0.860255	8.82298	0.06507	0.4025	3.AD/2.MCI	Neural Stem
ENSG00000131095	GFAP	2.09144	7.07868	0.0652518	0.4031	2.MCI/1.YC	Neuroblast
ENSG00000099860	GADD45B	1.23022	1.76087	0.0654254	0.4037	1.YC/0.HA	Immature
ENSG00000107562	CXCL12	2.41949	3.38808	0.0654911	0.4037	2.MCI/1.YC	Neural Stem
ENSG00000154764	WNT7A	-1.50932	1.5748	0.0656002	0.4039	2.MCI/1.YC	Immature
ENSG00000133639	BTG1			0.065999	0.4052	Diagnosis	Neural Stem
ENSG00000162946	DISC1	-0.535906	6.76628	0.0659109	0.4052	3.AD/0.HA	Neural Stem
ENSG00000077782	FGFR1	-0.692098	6.22652	0.0661676	0.4052	3.AD/0.HA	Neural Stem
ENSG00000091136	LAMB1	1.95002	4.24777	0.0661522	0.4052	2.MCI/1.YC	Neural Stem
ENSG00000112964	GHR	-1.56323	6.24707	0.0661578	0.4052	1.YC/0.HA	Neuroblast
ENSG00000180398	MCFD2	-1.1878	4.7265	0.0662826	0.4055	3.AD/0.HA	Immature
ENSG00000113494	PRLR	-3.26567	3.08816	0.0670648	0.4095	1.YC/0.HA	Neural Stem
ENSG00000118432	CNR1	-1.30335	6.15651	0.0670852	0.4095	3.AD/0.HA	Neuroblast
ENSG00000155511	GRIA1	1.1034	8.9848	0.067256	0.4101	3.AD/0.HA	Neuroblast
ENSG00000168959	GRM5	-1.19429	4.82739	0.0674792	0.411	2.MCI/1.YC	Neural Stem
ENSG00000126351	THRA	-0.884454	5.85202	0.0677117	0.412	3.AD/0.HA	Immature
ENSG00000102879	CORO1A	-3.38561	1.90102	0.0679882	0.4132	3.AD/0.HA	Neural Stem
ENSG00000151067	CACNA1C	0.946669	9.52468	0.0681468	0.4137	3.AD/2.MCI	Immature
ENSG00000163513	TGFBR2	1.55122	3.77986	0.0685649	0.4143	1.YC/0.HA	Immature
ENSG00000058335	RASGRF1	0.745929	5.8699	0.0684218	0.4143	1.YC/0.HA	Immature
ENSG00000198121	LPAR1	-2.44287	4.74206	0.0683879	0.4143	3.AD/0.HA	Immature
ENSG00000026103	FAS	-7.70287	2.34427	0.0686098	0.4143	3.AD/1.YC	Immature
ENSG00000072864	NDE1	0.956753	6.34749	0.0684632	0.4143	1.YC/0.HA	Neuroblast
ENSG00000160789	LMNA	-0.880995	5.09604	0.0688221	0.4151	1.YC/0.HA	Neural Stem
ENSG00000131759	RARA	1.6571	2.85658	0.0692425	0.4159	3.AD/0.HA	Immature
ENSG00000026103	FAS			0.0692448	0.4159	Diagnosis	Neural Stem
ENSG00000113580	NR3C1	0.496405	7.59015	0.0692463	0.4159	3.AD/1.YC	Neural Stem
ENSG00000101439	CST3	-0.867256	7.92025	0.0691374	0.4159	3.AD/2.MCI	Neural Stem
ENSG00000147246	HTR2C			0.0694518	0.4167	Diagnosis	Immature
ENSG00000096696	DSP	-1.80817	3.47875	0.0696128	0.4168	1.YC/0.HA	Immature
ENSG00000130816	DNMT1	-1.72365	6.56821	0.0695852	0.4168	3.AD/2.MCI	Neuroblast
ENSG00000099860	GADD45B	-7.54463	2.19078	0.0697081	0.4169	3.AD/1.YC	Immature
ENSG00000181449	SOX2			0.0698051	0.4171	Diagnosis	Immature
ENSG00000124762	CDKN1A	-1.77995	3.30688	0.0699654	0.4176	3.AD/0.HA	Neural Stem
ENSG00000111728	ST8SIA1	0.754362	6.38646	0.0701278	0.4177	1.YC/0.HA	Immature
ENSG00000155368	DBI			0.0701203	0.4177	Diagnosis	Neural Stem
ENSG00000185652	NTF3	1.85809	3.02525	0.0705507	0.4197	3.AD/1.YC	Immature
ENSG00000106018	VIPR2	2.92173	2.12598	0.071102	0.4204	2.MCI/0.HA	Immature
ENSG00000138696	BMPR1B	0.758001	9.36594	0.0710028	0.4204	1.YC/0.HA	Neural Stem
ENSG00000273079	GRIN2B	0.68849	4.34108	0.0711069	0.4204	1.YC/0.HA	Neural Stem
ENSG00000115758	ODC1	-1.36393	2.58228	0.0709323	0.4204	3.AD/0.HA	Neural Stem
ENSG00000113494	PRLR	3.52497	2.07132	0.0708642	0.4204	2.MCI/1.YC	Neural Stem
ENSG00000087470	DNM1L	-1.01086	7.27187	0.0709324	0.4204	3.AD/1.YC	Neuroblast
ENSG00000132639	SNAP25	-0.834585	5.18107	0.0712098	0.4205	3.AD/2.MCI	Neural Stem
ENSG00000167552	TUBA1A	-0.897975	7.05135	0.0714035	0.4208	2.MCI/0.HA	Neural Stem
ENSG00000152822	GRM1	1.17115	7.01321	0.0713646	0.4208	3.AD/0.HA	Neuroblast
ENSG00000168959	GRM5	1.0076	8.52166	0.0718102	0.4223	3.AD/0.HA	Neuroblast
ENSG00000133639	BTG1	1.95879	5.91994	0.0717739	0.4223	3.AD/1.YC	Neuroblast
ENSG00000080815	PSEN1	-1.07201	6.49579	0.0719947	0.4225	2.MCI/1.YC	Immature
ENSG00000155368	DBI	1.47405	6.74621	0.0719296	0.4225	3.AD/1.YC	Neuroblast
ENSG00000006128	TAC1	2.91575	3.61554	0.0722564	0.4232	2.MCI/0.HA	Immature
ENSG00000120738	EGR1	-2.33761	3.23859	0.0721892	0.4232	3.AD/1.YC	Immature
ENSG00000273079	GRIN2B	1.01572	4.58521	0.0725428	0.424	2.MCI/0.HA	Neural Stem
ENSG00000183454	GRIN2A	1.01037	8.17987	0.0725277	0.424	1.YC/0.HA	Neuroblast
ENSG00000104327	CALB1			0.07278	0.4246	Diagnosis	Immature
ENSG00000134250	NOTCH2	0.851565	4.22457	0.0729878	0.4246	1.YC/0.HA	Immature
ENSG00000186868	MAPT			0.0728723	0.4246	Diagnosis	Neural Stem
ENSG00000132639	SNAP25	1.0701	6.67833	0.0729037	0.4246	1.YC/0.HA	Neural Stem
ENSG00000142949	PTPRF	-1.06999	6.52794	0.0730285	0.4246	2.MCI/1.YC	Neuroblast
ENSG00000120738	EGR1			0.0732731	0.4256	Diagnosis	Immature
ENSG00000134363	FST	-2.25677	1.8922	0.0735831	0.4269	1.YC/0.HA	Immature
ENSG00000171791	BCL2	-1.08557	6.94508	0.0738212	0.4274	3.AD/1.YC	Immature
ENSG00000080815	PSEN1	0.61418	7.59027	0.0738175	0.4274	3.AD/0.HA	Neural Stem
ENSG00000173511	VEGFB	0.792851	4.05829	0.0738905	0.4274	3.AD/2.MCI	Neural Stem
ENSG00000091136	LAMB1	-1.32927	4.21899	0.0740194	0.4277	3.AD/2.MCI	Neural Stem
ENSG00000169896	ITGAM	-2.26187	1.19826	0.0742117	0.4284	2.MCI/1.YC	Neural Stem
ENSG00000187323	DCC			0.0746366	0.4304	Diagnosis	Neural Stem
ENSG00000112964	GHR	0.777211	5.92852	0.0747709	0.4307	1.YC/0.HA	Immature
ENSG00000176749	CDK5R1			0.075128	0.4323	Diagnosis	Neural Stem
ENSG00000188906	LRRK2	-1.11217	5.64009	0.0752864	0.4326	2.MCI/1.YC	Immature
ENSG00000087088	BAX	-6.15694	3.0577	0.0753536	0.4326	3.AD/2.MCI	Immature
ENSG00000189403	HMGB1	1.26692	8.88225	0.0754064	0.4326	2.MCI/1.YC	Neural Stem
ENSG00000113580	NR3C1	-0.926306	7.53535	0.0757021	0.4335	3.AD/1.YC	Immature
ENSG00000113578	FGF1	-0.663864	7.33926	0.0757519	0.4335	1.YC/0.HA	Neural Stem
ENSG00000198576	ARC	-2.74911	1.15861	0.0757987	0.4335	2.MCI/1.YC	Neural Stem
ENSG00000198121	LPAR1	1.08887	8.78961	0.0758627	0.4335	1.YC/0.HA	Neuroblast
ENSG00000122756	CNTFR	0.816297	2.7281	0.0763251	0.4339	1.YC/0.HA	Immature
ENSG00000067182	TNFRSF1A	-5.6344	2.20528	0.0763166	0.4339	3.AD/0.HA	Immature
ENSG00000181449	SOX2			0.0763279	0.4339	Diagnosis	Neural Stem
ENSG00000173511	VEGFB	-0.86437	4.06097	0.0760111	0.4339	2.MCI/0.HA	Neural Stem
ENSG00000162998	FRZB	2.42191	2.57901	0.0762405	0.4339	2.MCI/1.YC	Neural Stem
ENSG00000138685	FGF2	-6.12855	2.51718	0.076597	0.435	3.AD/0.HA	Immature
ENSG00000106278	PTPRZ1	0.810677	9.68407	0.0769223	0.4364	1.YC/0.HA	Neural Stem
ENSG00000171316	CHD7	0.828207	6.19221	0.0771242	0.4367	2.MCI/0.HA	Immature
ENSG00000082175	PGR			0.0770621	0.4367	Diagnosis	Neural Stem
ENSG00000165795	NDRG2	0.729136	7.38158	0.0773637	0.4376	1.YC/0.HA	Neural Stem
ENSG00000079215	SLC1A3			0.0777628	0.439	Diagnosis	Immature
ENSG00000124766	SOX4	2.7071	5.75838	0.0777447	0.439	3.AD/1.YC	Neuroblast
ENSG00000155368	DBI	-1.62492	6.93073	0.0779111	0.4394	1.YC/0.HA	Neuroblast
ENSG00000169083	AR	0.688854	4.64875	0.0780933	0.4399	3.AD/0.HA	Neural Stem
ENSG00000120738	EGR1	1.32829	2.80313	0.0782042	0.4401	1.YC/0.HA	Immature
ENSG00000134363	FST			0.0783107	0.4402	Diagnosis	Immature
ENSG00000007062	PROM1	2.40876	1.95776	0.078364	0.4402	2.MCI/0.HA	Immature
ENSG00000096696	DSP			0.0785685	0.4409	Diagnosis	Immature
ENSG00000151090	THRB	1.03384	8.44837	0.0789617	0.4426	1.YC/0.HA	Immature
ENSG00000149295	DRD2			0.0791833	0.4431	Diagnosis	Immature
ENSG00000080815	PSEN1	-0.992667	6.5443	0.079209	0.4431	3.AD/1.YC	Immature
ENSG00000160789	LMNA	1.01436	3.46605	0.0795745	0.4447	1.YC/0.HA	Immature
ENSG00000066468	FGFR2	-0.808595	8.26887	0.0797536	0.4453	2.MCI/1.YC	Neural Stem
ENSG00000175344	CHRNA7	-0.869461	4.15739	0.0801034	0.4457	2.MCI/1.YC	Immature
ENSG00000133794	ARNTL			0.0801402	0.4457	Diagnosis	Neural Stem
ENSG00000153094	BCL2L11	1.53618	3.69476	0.0799018	0.4457	2.MCI/1.YC	Neural Stem
ENSG00000183454	GRIN2A	1.03516	8.3546	0.0801164	0.4457	3.AD/0.HA	Neuroblast
ENSG00000168394	TAP1			0.0803192	0.4462	Diagnosis	Neural Stem
ENSG00000182621	PLCB1			0.0805302	0.447	Diagnosis	Neural Stem
ENSG00000188906	LRRK2	0.734262	5.54849	0.0809533	0.4477	1.YC/0.HA	Immature
ENSG00000175344	CHRNA7	0.893807	3.87666	0.0809928	0.4477	1.YC/0.HA	Immature
ENSG00000138685	FGF2	-0.86625	7.72188	0.0810692	0.4477	2.MCI/1.YC	Neural Stem
ENSG00000182220	ATP6AP2	-0.916453	5.03019	0.0809035	0.4477	2.MCI/1.YC	Neural Stem
ENSG00000147246	HTR2C	-2.21886	2.28652	0.0811364	0.4477	3.AD/2.MCI	Neural Stem
ENSG00000132639	SNAP25	-1.54525	9.59433	0.08092	0.4477	3.AD/1.YC	Neuroblast
ENSG00000151090	THRB	0.883736	7.41404	0.0816689	0.4497	1.YC/0.HA	Neuroblast
ENSG00000102081	FMR1	-1.03403	6.21189	0.0816001	0.4497	2.MCI/1.YC	Neuroblast
ENSG00000102468	HTR2A	1.30611	2.85201	0.0818949	0.4505	1.YC/0.HA	Neural Stem
ENSG00000273079	GRIN2B	1.13355	8.94747	0.0821312	0.4514	3.AD/2.MCI	Neuroblast
ENSG00000091831	ESR1			0.0825716	0.4534	Diagnosis	Immature
ENSG00000151012	SLC7A11	1.03436	6.29083	0.0829916	0.4552	3.AD/1.YC	Immature
ENSG00000157240	FZD1			0.0836971	0.4554	Diagnosis	Immature
ENSG00000151067	CACNA1C			0.0831152	0.4554	Diagnosis	Immature
ENSG00000153094	BCL2L11	-1.06985	3.2447	0.0832661	0.4554	1.YC/0.HA	Immature
ENSG00000148400	NOTCH1	1.61296	2.41855	0.0837817	0.4554	1.YC/0.HA	Immature
ENSG00000132688	NES			0.0839069	0.4554	Diagnosis	Neural Stem
ENSG00000113494	PRLR			0.0835018	0.4554	Diagnosis	Neural Stem
ENSG00000138685	FGF2	0.887591	7.72329	0.0832259	0.4554	1.YC/0.HA	Neural Stem
ENSG00000169083	AR	1.51817	4.25316	0.083427	0.4554	2.MCI/1.YC	Neural Stem
ENSG00000113070	HBEGF	1.22169	2.28203	0.0836067	0.4554	3.AD/1.YC	Neural Stem
ENSG00000112576	CCND3	-0.8585	6.06487	0.0838916	0.4554	3.AD/2.MCI	Neural Stem
ENSG00000120907	ADRA1A	1.25046	6.51983	0.0833447	0.4554	3.AD/0.HA	Neuroblast
ENSG00000189056	RELN	-2.01814	6.1415	0.0841893	0.4562	2.MCI/1.YC	Immature
ENSG00000125378	BMP4			0.0842715	0.4562	Diagnosis	Neural Stem
ENSG00000148180	GSN	-0.692147	7.69583	0.0842954	0.4562	1.YC/0.HA	Neural Stem
ENSG00000132326	PER2	0.89843	3.87767	0.0846597	0.4564	1.YC/0.HA	Immature
ENSG00000102755	FLT1	-2.60878	2.9344	0.0846096	0.4564	2.MCI/0.HA	Immature
ENSG00000087470	DNM1L	-0.885603	7.12571	0.0844446	0.4564	3.AD/0.HA	Immature
ENSG00000182621	PLCB1	0.772477	9.13209	0.0845847	0.4564	2.MCI/0.HA	Neural Stem
ENSG00000205927	OLIG2	1.16814	3.21198	0.084935	0.4574	3.AD/0.HA	Neural Stem
ENSG00000091136	LAMB1	0.823649	6.53743	0.0851292	0.4577	3.AD/0.HA	Immature
ENSG00000172137	CALB2	-1.62317	3.46364	0.0852467	0.4577	3.AD/1.YC	Immature
ENSG00000122966	CIT	0.96891	3.64548	0.0852888	0.4577	1.YC/0.HA	Neural Stem
ENSG00000026103	FAS	-1.12674	4.74946	0.0853193	0.4577	3.AD/2.MCI	Neural Stem
ENSG00000151067	CACNA1C	-0.709785	9.63955	0.0858133	0.4586	1.YC/0.HA	Immature
ENSG00000198947	DMD	0.678447	10.8997	0.0856854	0.4586	3.AD/0.HA	Immature
ENSG00000137752	CASP1	-6.02658	1.09929	0.0857564	0.4586	1.YC/0.HA	Neural Stem
ENSG00000107331	ABCA2	0.840918	7.46284	0.0858767	0.4586	3.AD/0.HA	Neural Stem
ENSG00000066468	FGFR2	-1.13412	7.96954	0.0856111	0.4586	2.MCI/1.YC	Neuroblast
ENSG00000142192	APP	0.443885	9.11037	0.0860151	0.4589	3.AD/0.HA	Neural Stem
ENSG00000125378	BMP4	1.6425	1.9582	0.0862048	0.459	3.AD/0.HA	Neural Stem
ENSG00000066468	FGFR2	-0.456084	8.42254	0.0862788	0.459	3.AD/1.YC	Neural Stem
ENSG00000171885	AQP4			0.0861178	0.459	Diagnosis	Neuroblast
ENSG00000157540	DYRK1A			0.0866932	0.4594	Diagnosis	Immature
ENSG00000125266	EFNB2	-1.38934	5.07278	0.086522	0.4594	3.AD/1.YC	Immature
ENSG00000105810	CDK6			0.0865991	0.4594	Diagnosis	Neural Stem
ENSG00000240972	MIF	-0.702379	5.72877	0.0866868	0.4594	3.AD/0.HA	Neural Stem
ENSG00000067560	RHOA	-0.995083	5.19023	0.0870013	0.4606	3.AD/1.YC	Immature
ENSG00000185920	PTCH1	-1.78043	4.54154	0.0871252	0.4608	3.AD/1.YC	Immature
ENSG00000126351	THRA	-1.13478	6.09405	0.087795	0.4638	3.AD/2.MCI	Immature
ENSG00000171885	AQP4			0.0879464	0.4638	Diagnosis	Neural Stem
ENSG00000154764	WNT7A	0.909078	2.90962	0.0880942	0.4638	3.AD/0.HA	Neural Stem
ENSG00000272398	CD24	1.50492	2.62363	0.0880247	0.4638	3.AD/2.MCI	Neural Stem
ENSG00000119689	DLST	-1.16554	5.6996	0.0880374	0.4638	2.MCI/1.YC	Neuroblast
ENSG00000152413	HOMER1	-1.09603	4.95268	0.0885583	0.4654	2.MCI/1.YC	Neural Stem
ENSG00000138795	LEF1	1.00707	3.13841	0.0884983	0.4654	3.AD/1.YC	Neural Stem
ENSG00000128683	GAD1	-1.1234	5.66769	0.0887975	0.4662	3.AD/1.YC	Immature
ENSG00000126351	THRA	1.25257	6.04106	0.0888966	0.4663	2.MCI/1.YC	Immature
ENSG00000169562	GJB1	1.09983	3.32146	0.0889833	0.4663	3.AD/1.YC	Neural Stem
ENSG00000173511	VEGFB			0.0891188	0.4664	Diagnosis	Immature
ENSG00000149295	DRD2			0.0891752	0.4664	Diagnosis	Neural Stem
ENSG00000165806	CASP7	2.12735	1.90942	0.0895841	0.4681	2.MCI/0.HA	Immature
ENSG00000165795	NDRG2			0.0899718	0.4697	Diagnosis	Neuroblast
ENSG00000116106	EPHA4	0.953895	5.83683	0.0904511	0.4718	1.YC/0.HA	Neural Stem
ENSG00000130816	DNMT1	-1.0611	4.39491	0.0912564	0.4755	3.AD/0.HA	Immature
ENSG00000073282	TP63	-1.12912	3.45179	0.0915166	0.4765	3.AD/2.MCI	Neural Stem
ENSG00000105329	TGFB1			0.0917404	0.4768	Diagnosis	Immature
ENSG00000173511	VEGFB	-0.905601	2.82663	0.0917637	0.4768	2.MCI/1.YC	Immature
ENSG00000160789	LMNA			0.0918415	0.4768	Diagnosis	Neural Stem
ENSG00000017427	IGF1	-1.89078	3.11526	0.0921047	0.4769	3.AD/0.HA	Immature
ENSG00000113578	FGF1			0.0920665	0.4769	Diagnosis	Neural Stem
ENSG00000096696	DSP			0.0919826	0.4769	Diagnosis	Neural Stem
ENSG00000004487	KDM1A	-0.903994	6.14271	0.0922302	0.4771	2.MCI/0.HA	Immature
ENSG00000165795	NDRG2	1.62564	4.74448	0.0927414	0.4793	1.YC/0.HA	Immature
ENSG00000182621	PLCB1	-0.924225	9.22771	0.0928649	0.4795	3.AD/1.YC	Neuroblast
ENSG00000149295	DRD2	-2.51227	0.90608	0.0931812	0.4801	3.AD/0.HA	Neural Stem
ENSG00000138696	BMPR1B	-0.843218	8.90122	0.093239	0.4801	3.AD/2.MCI	Neural Stem
ENSG00000181449	SOX2	1.1363	7.04998	0.0931707	0.4801	2.MCI/0.HA	Neuroblast
ENSG00000112038	OPRM1	-1.00506	4.87988	0.0933982	0.4803	3.AD/1.YC	Immature
ENSG00000166579	NDEL1	-0.579642	5.86574	0.0934566	0.4803	3.AD/0.HA	Neural Stem
ENSG00000165806	CASP7	-0.77945	5.02969	0.0935533	0.4804	3.AD/2.MCI	Neural Stem
ENSG00000125266	EFNB2			0.0937739	0.4808	Diagnosis	Neural Stem
ENSG00000112576	CCND3	-1.32822	5.79067	0.0938041	0.4808	2.MCI/1.YC	Neuroblast
ENSG00000133216	EPHB2	-0.995506	5.80341	0.0940422	0.4816	2.MCI/1.YC	Neuroblast
ENSG00000173406	DAB1			0.094593	0.4835	Diagnosis	Neural Stem
ENSG00000124181	PLCG1	0.671598	5.88368	0.0945124	0.4835	1.YC/0.HA	Neural Stem
ENSG00000138696	BMPR1B			0.0947225	0.4838	Diagnosis	Neural Stem
ENSG00000176887	SOX11	1.43192	1.72442	0.0948662	0.484	3.AD/1.YC	Neural Stem
ENSG00000140557	ST8SIA2	1.42711	1.77583	0.0951652	0.4843	1.YC/0.HA	Immature
ENSG00000105327	BBC3			0.0950853	0.4843	Diagnosis	Neural Stem
ENSG00000105327	BBC3	-2.65913	0.965448	0.0950896	0.4843	1.YC/0.HA	Neural Stem
ENSG00000171552	BCL2L1	-1.02091	5.16081	0.0958359	0.4872	2.MCI/1.YC	Immature
ENSG00000115353	TACR1			0.0960339	0.4878	Diagnosis	Immature
ENSG00000154928	EPHB1			0.0966195	0.4901	Diagnosis	Neuroblast
ENSG00000130816	DNMT1	1.46977	6.45515	0.096664	0.4901	2.MCI/1.YC	Neuroblast
ENSG00000135919	SERPINE2			0.0972931	0.491	Diagnosis	Immature
ENSG00000113758	DBN1			0.0970711	0.491	Diagnosis	Immature
ENSG00000138696	BMPR1B	1.36711	5.36518	0.0973659	0.491	1.YC/0.HA	Immature
ENSG00000128602	SMO	-5.62514	2.25087	0.0973187	0.491	3.AD/0.HA	Immature
ENSG00000151623	NR3C2	0.691332	8.18	0.097084	0.491	1.YC/0.HA	Neural Stem
ENSG00000113758	DBN1	-0.843165	2.99988	0.0973679	0.491	3.AD/0.HA	Neural Stem
ENSG00000171552	BCL2L1	0.870614	6.68522	0.0977406	0.4925	3.AD/0.HA	Neuroblast
ENSG00000151790	TDO2			0.0985785	0.4926	Diagnosis	Immature
ENSG00000072864	NDE1			0.0986943	0.4926	Diagnosis	Immature
ENSG00000112333	NR2E1			0.0985406	0.4926	Diagnosis	Neural Stem
ENSG00000171476	HOPX	0.999841	5.81346	0.0987206	0.4926	2.MCI/0.HA	Neural Stem
ENSG00000007372	PAX6	-0.653688	5.61079	0.0984219	0.4926	3.AD/0.HA	Neural Stem
ENSG00000117480	FAAH	0.820866	3.86097	0.0986332	0.4926	3.AD/1.YC	Neural Stem
ENSG00000162946	DISC1	0.659244	6.24336	0.0985779	0.4926	3.AD/1.YC	Neural Stem
ENSG00000164600	NEUROD6	-1.27971	1.90199	0.0981388	0.4926	3.AD/1.YC	Neural Stem
ENSG00000136535	TBR1			0.0980872	0.4926	Diagnosis	Neuroblast
ENSG00000100285	NEFH	1.10811	6.62085	0.0987034	0.4926	1.YC/0.HA	Neuroblast
ENSG00000164600	NEUROD6	-1.72456	5.92129	0.0981391	0.4926	3.AD/1.YC	Neuroblast
ENSG00000273079	GRIN2B	-0.669285	9.78512	0.0988787	0.4929	1.YC/0.HA	Immature
ENSG00000113140	SPARC	-0.677782	6.27604	0.0992408	0.4943	2.MCI/0.HA	Neural Stem
ENSG00000272398	CD24			0.0995564	0.4954	Diagnosis	Neural Stem
ENSG00000115758	ODC1	-0.992741	2.32593	0.0997187	0.4958	3.AD/1.YC	Neural Stem
ENSG00000124766	SOX4	2.46366	5.78203	0.0999065	0.4963	2.MCI/1.YC	Neuroblast
ENSG00000165806	CASP7			0.100246	0.4971	Diagnosis	Neural Stem
ENSG00000124766	SOX4	0.826436	1.4826	0.100267	0.4971	2.MCI/0.HA	Neural Stem
ENSG00000164687	FABP5	1.86039	6.65637	0.100335	0.4971	2.MCI/1.YC	Neuroblast
ENSG00000004487	KDM1A	-0.525151	6.18877	0.101535	0.4988	1.YC/0.HA	Immature
ENSG00000142208	AKT1	-1.98919	2.91987	0.100779	0.4988	3.AD/1.YC	Immature
ENSG00000120738	EGR1			0.101481	0.4988	Diagnosis	Neural Stem
ENSG00000107331	ABCA2			0.101316	0.4988	Diagnosis	Neural Stem
ENSG00000142192	APP			0.101185	0.4988	Diagnosis	Neural Stem
ENSG00000151322	NPAS3	-0.481574	12.0321	0.101367	0.4988	3.AD/1.YC	Neural Stem
ENSG00000128683	GAD1	-1.55619	1.63872	0.100851	0.4988	3.AD/2.MCI	Neural Stem
ENSG00000189056	RELN	0.776729	4.95008	0.101558	0.4988	3.AD/2.MCI	Neural Stem
ENSG00000188906	LRRK2	-1.66414	5.88913	0.101236	0.4988	3.AD/1.YC	Neuroblast
ENSG00000124140	SLC12A5	-1.55177	6.33063	0.101031	0.4988	3.AD/1.YC	Neuroblast
ENSG00000135919	SERPINE2	1.91275	4.60099	0.101773	0.4991	2.MCI/0.HA	Immature
ENSG00000136535	TBR1	-1.31503	4.12021	0.101804	0.4991	3.AD/1.YC	Immature
ENSG00000121769	FABP3			0.102394	0.4993	Diagnosis	Immature
ENSG00000176749	CDK5R1			0.102433	0.4993	Diagnosis	Immature
ENSG00000145242	EPHA5			0.102413	0.4993	Diagnosis	Neural Stem
ENSG00000196411	EPHB4	1.2788	1.5201	0.102265	0.4993	1.YC/0.HA	Neural Stem
ENSG00000159593	NAE1	0.59103	5.47388	0.102325	0.4993	2.MCI/0.HA	Neural Stem
ENSG00000106278	PTPRZ1	-0.553944	9.11068	0.102357	0.4993	3.AD/0.HA	Neural Stem
ENSG00000173406	DAB1	1.07236	8.47252	0.102459	0.4993	3.AD/0.HA	Neuroblast
ENSG00000171885	AQP4	-0.951345	9.28428	0.102686	0.4999	2.MCI/1.YC	Neural Stem
ENSG00000145335	SNCA	-0.532395	7.89565	0.102923	0.5006	1.YC/0.HA	Immature
ENSG00000118971	CCND2			0.103087	0.501	Diagnosis	Neural Stem
ENSG00000186951	PPARA	0.95811	3.78588	0.10334	0.5016	1.YC/0.HA	Immature
ENSG00000112242	E2F3	0.931983	6.77459	0.103465	0.5016	3.AD/1.YC	Immature
ENSG00000155511	GRIA1	0.798873	6.41309	0.103586	0.5016	2.MCI/0.HA	Neural Stem
ENSG00000077782	FGFR1	1.14187	6.69466	0.103646	0.5016	2.MCI/0.HA	Neuroblast
ENSG00000101439	CST3	-1.14321	9.15073	0.103564	0.5016	2.MCI/0.HA	Neuroblast
ENSG00000128602	SMO			0.103829	0.502	Diagnosis	Immature
ENSG00000162998	FRZB			0.104351	0.5039	Diagnosis	Immature
ENSG00000171867	PRNP	0.557626	6.67582	0.104399	0.5039	1.YC/0.HA	Neural Stem
ENSG00000028137	TNFRSF1B	1.69519	1.61168	0.104879	0.5053	3.AD/1.YC	Neural Stem
ENSG00000144476	ACKR3	-0.719593	3.71843	0.104952	0.5053	3.AD/1.YC	Neural Stem
ENSG00000164600	NEUROD6	-1.97571	6.49815	0.104895	0.5053	3.AD/2.MCI	Neuroblast
ENSG00000125285	SOX21	-1.05651	3.02811	0.105185	0.5055	3.AD/1.YC	Neural Stem
ENSG00000144476	ACKR3	-0.872722	3.89012	0.105144	0.5055	3.AD/2.MCI	Neural Stem
ENSG00000120738	EGR1	-2.34941	3.50239	0.10624	0.5063	3.AD/2.MCI	Immature
ENSG00000102468	HTR2A	-2.55015	3.66636	0.106031	0.5063	3.AD/2.MCI	Immature
ENSG00000099860	GADD45B	-5.25391	2.44776	0.105724	0.5063	3.AD/2.MCI	Immature
ENSG00000165806	CASP7	0.71996	5.25666	0.10625	0.5063	1.YC/0.HA	Neural Stem
ENSG00000102879	CORO1A	-3.42696	1.7171	0.106123	0.5063	2.MCI/0.HA	Neural Stem
ENSG00000132639	SNAP25	-0.693345	5.94562	0.106273	0.5063	2.MCI/0.HA	Neural Stem
ENSG00000142208	AKT1	-0.895505	3.07473	0.106193	0.5063	2.MCI/1.YC	Neural Stem
ENSG00000102755	FLT1	-1.09189	1.99084	0.106322	0.5063	3.AD/2.MCI	Neural Stem
ENSG00000145242	EPHA5	0.817733	7.4048	0.106335	0.5063	1.YC/0.HA	Neuroblast
ENSG00000173406	DAB1	1.26439	8.81035	0.1059	0.5063	2.MCI/0.HA	Neuroblast
ENSG00000133639	BTG1	1.82392	6.09364	0.106317	0.5063	2.MCI/1.YC	Neuroblast
ENSG00000089250	NOS1			0.10648	0.5066	Diagnosis	Immature
ENSG00000084093	REST	-5.33065	2.50013	0.106704	0.5072	3.AD/2.MCI	Immature
ENSG00000067182	TNFRSF1A			0.107485	0.5091	Diagnosis	Immature
ENSG00000128564	VGF	1.43827	3.47143	0.107435	0.5091	1.YC/0.HA	Immature
ENSG00000125285	SOX21	1.98997	0.516871	0.107661	0.5091	1.YC/0.HA	Immature
ENSG00000272398	CD24	2.29891	6.04576	0.108105	0.5091	2.MCI/1.YC	Immature
ENSG00000138795	LEF1	-7.4711	2.16756	0.108093	0.5091	3.AD/1.YC	Immature
ENSG00000116678	LEPR	0.910993	7.34067	0.107511	0.5091	3.AD/2.MCI	Immature
ENSG00000064651	SLC12A2			0.107853	0.5091	Diagnosis	Neural Stem
ENSG00000132688	NES	-2.00869	2.03869	0.107971	0.5091	1.YC/0.HA	Neural Stem
ENSG00000145242	EPHA5	0.888018	5.1226	0.10764	0.5091	3.AD/0.HA	Neural Stem
ENSG00000080815	PSEN1	0.555985	7.61696	0.107739	0.5091	3.AD/2.MCI	Neural Stem
ENSG00000113140	SPARC	-1.14404	6.86334	0.107303	0.5091	2.MCI/0.HA	Neuroblast
ENSG00000168959	GRM5	1.06209	8.69633	0.10819	0.5091	3.AD/2.MCI	Neuroblast
ENSG00000028137	TNFRSF1B	-7.4574	2.13376	0.108329	0.5093	3.AD/1.YC	Immature
ENSG00000128602	SMO	-7.37386	2.0772	0.108715	0.5107	3.AD/1.YC	Immature
ENSG00000198121	LPAR1			0.109331	0.5111	Diagnosis	Immature
ENSG00000162998	FRZB	0.988938	2.28331	0.108878	0.5111	1.YC/0.HA	Immature
ENSG00000073756	PTGS2	-1.05466	1.77606	0.109237	0.5111	2.MCI/1.YC	Immature
ENSG00000159110	IFNAR2	-1.2723	5.1764	0.109249	0.5111	3.AD/1.YC	Immature
ENSG00000100097	LGALS1	-5.57848	2.65893	0.109137	0.5111	3.AD/2.MCI	Immature
ENSG00000006128	TAC1	-1.44065	4.91787	0.10901	0.5111	3.AD/0.HA	Neuroblast
ENSG00000095303	PTGS1	-5.70509	2.76012	0.110224	0.5136	3.AD/2.MCI	Immature
ENSG00000134250	NOTCH2	-0.671817	7.01977	0.110091	0.5136	3.AD/2.MCI	Neural Stem
ENSG00000151090	THRB			0.11025	0.5136	Diagnosis	Neuroblast
ENSG00000122585	NPY			0.110236	0.5136	Diagnosis	Neuroblast
ENSG00000112576	CCND3	1.32356	5.35786	0.110342	0.5137	2.MCI/0.HA	Immature
ENSG00000115353	TACR1	-1.19519	3.19014	0.110515	0.514	2.MCI/0.HA	Immature
ENSG00000132639	SNAP25	-0.529843	9.80284	0.111117	0.5148	1.YC/0.HA	Immature
ENSG00000101670	LIPG	1.6359	2.21614	0.111139	0.5148	2.MCI/0.HA	Immature
ENSG00000101670	LIPG	-5.91557	2.86602	0.111104	0.5148	3.AD/2.MCI	Immature
ENSG00000176165	FOXG1	-2.04336	5.98204	0.111103	0.5148	3.AD/1.YC	Neuroblast
ENSG00000058335	RASGRF1	1.1151	6.79457	0.110935	0.5148	3.AD/2.MCI	Neuroblast
ENSG00000151322	NPAS3	-0.884574	9.81425	0.111485	0.5151	2.MCI/1.YC	Immature
ENSG00000124140	SLC12A5	1.50302	2.65623	0.111389	0.5151	1.YC/0.HA	Neural Stem
ENSG00000137752	CASP1	-2.3054	1.3819	0.111324	0.5151	3.AD/0.HA	Neural Stem
ENSG00000122756	CNTFR	-2.06484	3.00612	0.111782	0.5161	3.AD/1.YC	Immature
ENSG00000198947	DMD	0.796481	10.9714	0.112132	0.5165	3.AD/1.YC	Immature
ENSG00000176884	GRIN1	-1.15122	2.92459	0.112077	0.5165	3.AD/1.YC	Neural Stem
ENSG00000066468	FGFR2	0.931217	8.3539	0.112144	0.5165	3.AD/0.HA	Neuroblast
ENSG00000171867	PRNP	-0.469841	6.68929	0.112255	0.5166	3.AD/1.YC	Neural Stem
ENSG00000124181	PLCG1	-1.18091	4.06173	0.113707	0.5225	3.AD/1.YC	Immature
ENSG00000152413	HOMER1	0.777654	5.04901	0.113789	0.5225	1.YC/0.HA	Neural Stem
ENSG00000152413	HOMER1	-0.641327	5.07635	0.113828	0.5225	3.AD/1.YC	Neural Stem
ENSG00000107331	ABCA2	-1.03302	5.84867	0.113999	0.5229	3.AD/1.YC	Immature
ENSG00000077279	DCX			0.114351	0.5236	Diagnosis	Immature
ENSG00000173406	DAB1	-0.875399	7.04478	0.114258	0.5236	2.MCI/1.YC	Neural Stem
ENSG00000149295	DRD2	-0.95537	2.11772	0.114887	0.5248	1.YC/0.HA	Immature
ENSG00000164434	FABP7	1.11557	4.80518	0.114777	0.5248	1.YC/0.HA	Neural Stem
ENSG00000113140	SPARC	0.849252	5.59682	0.114863	0.5248	2.MCI/1.YC	Neural Stem
ENSG00000168959	GRM5	-1.04971	4.83479	0.11502	0.525	2.MCI/0.HA	Neural Stem
ENSG00000155368	DBI			0.115328	0.526	Diagnosis	Neuroblast
ENSG00000162490	DRAXIN	-1.47418	0.633845	0.115475	0.5262	2.MCI/1.YC	Immature
ENSG00000165795	NDRG2			0.115903	0.5273	Diagnosis	Neural Stem
ENSG00000187323	DCC	-0.919283	9.27795	0.115901	0.5273	3.AD/0.HA	Neuroblast
ENSG00000162998	FRZB	-1.0014	1.88729	0.116726	0.5303	2.MCI/0.HA	Immature
ENSG00000074047	GLI2	-0.619914	5.54435	0.116745	0.5303	3.AD/2.MCI	Neural Stem
ENSG00000118432	CNR1			0.117068	0.5313	Diagnosis	Immature
ENSG00000105329	TGFB1	1.13721	2.46893	0.117819	0.5339	2.MCI/0.HA	Immature
ENSG00000138794	CASP6	-0.745771	3.0392	0.117967	0.5339	2.MCI/0.HA	Neural Stem
ENSG00000198576	ARC	-1.70649	1.3426	0.117834	0.5339	3.AD/0.HA	Neural Stem
ENSG00000054179	ENTPD2	-1.06959	3.62641	0.118005	0.5339	2.MCI/1.YC	Neural Stem
ENSG00000141510	TP53	1.06718	1.99048	0.118991	0.5346	1.YC/0.HA	Immature
ENSG00000110436	SLC1A2	-0.816892	8.99528	0.118472	0.5346	2.MCI/1.YC	Immature
ENSG00000118785	SPP1			0.118639	0.5346	Diagnosis	Neural Stem
ENSG00000106278	PTPRZ1			0.119004	0.5346	Diagnosis	Neural Stem
ENSG00000115355	CCDC88A	0.414215	9.17254	0.118842	0.5346	3.AD/0.HA	Neural Stem
ENSG00000164600	NEUROD6	-1.06807	1.51117	0.118934	0.5346	3.AD/0.HA	Neural Stem
ENSG00000109320	NFKB1	0.469699	7.11841	0.119027	0.5346	3.AD/2.MCI	Neural Stem
ENSG00000187323	DCC	-1.16461	9.29117	0.118343	0.5346	1.YC/0.HA	Neuroblast
ENSG00000118971	CCND2	-0.881199	6.46334	0.118402	0.5346	2.MCI/1.YC	Neuroblast
ENSG00000168394	TAP1			0.119156	0.5348	Diagnosis	Immature
ENSG00000112242	E2F3			0.119569	0.5362	Diagnosis	Immature
ENSG00000149295	DRD2	-2.49717	1.05001	0.119688	0.5363	3.AD/1.YC	Neural Stem
ENSG00000198121	LPAR1	-1.34915	6.45678	0.119932	0.5366	2.MCI/1.YC	Immature
ENSG00000127152	BCL11B	-1.15965	2.78992	0.120005	0.5366	1.YC/0.HA	Neural Stem
ENSG00000125266	EFNB2	0.732475	4.68977	0.120037	0.5366	2.MCI/0.HA	Neural Stem
ENSG00000189056	RELN	0.971416	4.16985	0.120209	0.5369	2.MCI/1.YC	Neural Stem
ENSG00000152822	GRM1	-0.645793	4.58645	0.120334	0.5371	2.MCI/0.HA	Neural Stem
ENSG00000162998	FRZB	-1.9207	2.81604	0.120461	0.5372	1.YC/0.HA	Neural Stem
ENSG00000120088	CRHR1	-0.551793	4.08956	0.120698	0.5376	2.MCI/0.HA	Immature
ENSG00000121769	FABP3	-2.11276	5.00012	0.120737	0.5376	3.AD/1.YC	Neuroblast
ENSG00000106546	AHR	-0.517751	5.43292	0.120993	0.5383	3.AD/0.HA	Neural Stem
ENSG00000121966	CXCR4	-1.27698	2.06753	0.121239	0.5389	2.MCI/1.YC	Neural Stem
ENSG00000082701	GSK3B	-0.936125	8.07676	0.121311	0.5389	3.AD/1.YC	Neuroblast
ENSG00000162992	NEUROD1	-1.14796	4.85985	0.121531	0.5394	3.AD/2.MCI	Immature
ENSG00000087470	DNM1L			0.122287	0.5423	Diagnosis	Immature
ENSG00000131759	RARA	1.53389	2.8313	0.122656	0.5435	3.AD/1.YC	Immature
ENSG00000169083	AR	-2.00003	3.17904	0.123198	0.5439	3.AD/0.HA	Immature
ENSG00000120265	PCMT1	-0.855755	6.49976	0.12323	0.5439	3.AD/2.MCI	Immature
ENSG00000102755	FLT1			0.123113	0.5439	Diagnosis	Neural Stem
ENSG00000120088	CRHR1	1.83481	2.29712	0.122833	0.5439	3.AD/0.HA	Neural Stem
ENSG00000176165	FOXG1	-2.24933	6.31636	0.123201	0.5439	3.AD/0.HA	Neuroblast
ENSG00000124140	SLC12A5	-0.918591	6.64333	0.123313	0.5439	2.MCI/1.YC	Neuroblast
ENSG00000121966	CXCR4	-1.14998	2.1574	0.124108	0.547	3.AD/1.YC	Neural Stem
ENSG00000175344	CHRNA7	0.957969	2.35048	0.124342	0.5476	1.YC/0.HA	Neural Stem
ENSG00000120907	ADRA1A	0.76548	9.27862	0.124849	0.5488	3.AD/2.MCI	Immature
ENSG00000171885	AQP4	-1.3223	7.53774	0.124915	0.5488	1.YC/0.HA	Neuroblast
ENSG00000120907	ADRA1A	1.70949	6.98267	0.12476	0.5488	2.MCI/1.YC	Neuroblast
ENSG00000198515	CNGA1	-1.49537	0.632515	0.125256	0.5499	2.MCI/1.YC	Immature
ENSG00000165795	NDRG2	0.835318	7.81031	0.125419	0.5502	3.AD/0.HA	Neuroblast
ENSG00000185122	HSF1	-1.20015	3.63283	0.125946	0.5514	3.AD/1.YC	Immature
ENSG00000068078	FGFR3	-0.651371	6.2666	0.125859	0.5514	2.MCI/0.HA	Neural Stem
ENSG00000023287	RB1CC1	0.811039	7.84142	0.12603	0.5514	1.YC/0.HA	Neuroblast
ENSG00000176884	GRIN1	-1.09486	6.68925	0.126104	0.5514	3.AD/1.YC	Neuroblast
ENSG00000102468	HTR2A			0.126325	0.552	Diagnosis	Neuroblast
ENSG00000152413	HOMER1	-0.608481	7.29859	0.12663	0.5525	2.MCI/0.HA	Immature
ENSG00000096696	DSP	2.07379	3.91678	0.126597	0.5525	2.MCI/1.YC	Immature
ENSG00000128683	GAD1	-2.43558	6.23052	0.126853	0.553	3.AD/2.MCI	Neuroblast
ENSG00000131095	GFAP			0.127218	0.5537	Diagnosis	Neural Stem
ENSG00000136535	TBR1	-2.07101	5.61879	0.127134	0.5537	3.AD/1.YC	Neuroblast
ENSG00000117480	FAAH			0.127678	0.5539	Diagnosis	Immature
ENSG00000240972	MIF			0.127507	0.5539	Diagnosis	Immature
ENSG00000145242	EPHA5	0.871586	8.28112	0.127662	0.5539	3.AD/0.HA	Immature
ENSG00000131095	GFAP	-3.16394	5.2856	0.127744	0.5539	3.AD/0.HA	Immature
ENSG00000154928	EPHB1	1.34105	6.10344	0.127506	0.5539	3.AD/0.HA	Neuroblast
ENSG00000007372	PAX6	1.3037	2.23805	0.128088	0.5545	1.YC/0.HA	Immature
ENSG00000100285	NEFH	-1.62381	2.66143	0.128175	0.5545	2.MCI/1.YC	Neural Stem
ENSG00000171885	AQP4	-1.04389	7.53306	0.128192	0.5545	3.AD/0.HA	Neuroblast
ENSG00000112715	VEGFA	-5.70973	2.30076	0.128796	0.5546	3.AD/0.HA	Immature
ENSG00000150594	ADRA2A	-1.17175	1.36745	0.128505	0.5546	2.MCI/1.YC	Immature
ENSG00000134982	APC			0.128765	0.5546	Diagnosis	Neural Stem
ENSG00000026103	FAS	-1.36352	5.61959	0.12839	0.5546	1.YC/0.HA	Neural Stem
ENSG00000102468	HTR2A	-0.81235	3.07589	0.128723	0.5546	2.MCI/1.YC	Neural Stem
ENSG00000081479	LRP2	1.83863	7.43664	0.128705	0.5546	3.AD/1.YC	Neural Stem
ENSG00000109320	NFKB1	0.493141	6.19862	0.129197	0.5559	1.YC/0.HA	Immature
ENSG00000173406	DAB1	1.00217	8.25953	0.12938	0.5563	1.YC/0.HA	Neuroblast
ENSG00000112715	VEGFA	-1.28926	2.17977	0.129908	0.5568	2.MCI/0.HA	Immature
ENSG00000130368	MAS1	1.46855	3.88324	0.129868	0.5568	2.MCI/1.YC	Immature
ENSG00000152413	HOMER1			0.12981	0.5568	Diagnosis	Neural Stem
ENSG00000107779	BMPR1A	-0.399892	8.43221	0.129717	0.5568	3.AD/1.YC	Neural Stem
ENSG00000106546	AHR	0.738737	4.91981	0.130099	0.5572	3.AD/1.YC	Neural Stem
ENSG00000100285	NEFH	-6.69383	3.51962	0.130677	0.5593	3.AD/2.MCI	Immature
ENSG00000099860	GADD45B			0.130933	0.5595	Diagnosis	Immature
ENSG00000160789	LMNA	-6.5506	3.35269	0.130905	0.5595	3.AD/2.MCI	Immature
ENSG00000152413	HOMER1	0.639087	7.68319	0.131166	0.5601	1.YC/0.HA	Immature
ENSG00000120907	ADRA1A			0.132476	0.5618	Diagnosis	Immature
ENSG00000151790	TDO2	-0.90747	5.07328	0.132012	0.5618	1.YC/0.HA	Immature
ENSG00000154928	EPHB1	-1.33462	5.65023	0.132501	0.5618	3.AD/0.HA	Immature
ENSG00000134259	NGF	-0.937327	2.3922	0.132342	0.5618	2.MCI/1.YC	Immature
ENSG00000082175	PGR	1.46226	2.24733	0.13174	0.5618	2.MCI/1.YC	Neural Stem
ENSG00000096696	DSP	4.30667	2.80954	0.13242	0.5618	3.AD/1.YC	Neural Stem
ENSG00000159388	BTG2			0.132561	0.5618	Diagnosis	Neuroblast
ENSG00000137642	SORL1	-0.951604	8.22503	0.132493	0.5618	3.AD/0.HA	Neuroblast
ENSG00000130203	APOE	-1.0177	8.15399	0.132495	0.5618	3.AD/0.HA	Neuroblast
ENSG00000116106	EPHA4	-1.03714	7.55778	0.132236	0.5618	3.AD/1.YC	Neuroblast
ENSG00000176749	CDK5R1	1.06036	5.98438	0.13296	0.5631	2.MCI/1.YC	Immature
ENSG00000115194	SLC30A3			0.13342	0.5636	Diagnosis	Immature
ENSG00000182621	PLCB1	0.562696	10.6836	0.133594	0.5636	3.AD/0.HA	Immature
ENSG00000154764	WNT7A	-6.97089	1.76621	0.133533	0.5636	3.AD/1.YC	Immature
ENSG00000091136	LAMB1	0.783154	6.71193	0.133576	0.5636	3.AD/2.MCI	Immature
ENSG00000157540	DYRK1A	0.820975	8.36851	0.133208	0.5636	3.AD/2.MCI	Immature
ENSG00000100968	NFATC4			0.133955	0.5647	Diagnosis	Immature
ENSG00000112333	NR2E1	-6.85856	1.66702	0.134332	0.5655	3.AD/1.YC	Immature
ENSG00000169562	GJB1	-6.92065	1.68328	0.13428	0.5655	3.AD/1.YC	Immature
ENSG00000138795	LEF1	1.63311	1.63525	0.134803	0.5658	1.YC/0.HA	Immature
ENSG00000169896	ITGAM	1.40231	2.40222	0.134779	0.5658	1.YC/0.HA	Immature
ENSG00000133639	BTG1	1.42629	5.63009	0.134684	0.5658	2.MCI/1.YC	Immature
ENSG00000151623	NR3C2	0.803869	9.55149	0.134698	0.5658	3.AD/2.MCI	Immature
ENSG00000125285	SOX21	-0.788469	3.10964	0.134945	0.5659	2.MCI/1.YC	Neural Stem
ENSG00000142949	PTPRF	-0.919597	4.7002	0.135211	0.5662	3.AD/0.HA	Immature
ENSG00000182220	ATP6AP2			0.135123	0.5662	Diagnosis	Neuroblast
ENSG00000081479	LRP2	-1.29236	7.36024	0.135607	0.5674	2.MCI/0.HA	Neuroblast
ENSG00000134250	NOTCH2			0.13583	0.5679	Diagnosis	Immature
ENSG00000108947	EFNB3	-0.501214	4.1131	0.136219	0.5683	2.MCI/0.HA	Immature
ENSG00000198121	LPAR1	0.589177	8.40062	0.136217	0.5683	3.AD/2.MCI	Neural Stem
ENSG00000133794	ARNTL	1.07557	6.545	0.136087	0.5683	3.AD/2.MCI	Neuroblast
ENSG00000074181	NOTCH3			0.136822	0.5685	Diagnosis	Immature
ENSG00000162946	DISC1	-0.748203	6.56618	0.136877	0.5685	2.MCI/1.YC	Immature
ENSG00000126368	NR1D1	-0.65054	3.54619	0.136725	0.5685	2.MCI/0.HA	Neural Stem
ENSG00000167552	TUBA1A	-0.543047	7.15444	0.136743	0.5685	3.AD/0.HA	Neural Stem
ENSG00000171094	ALK	-0.504854	6.02369	0.136435	0.5685	3.AD/2.MCI	Neural Stem
ENSG00000138795	LEF1	-1.35725	3.87077	0.136665	0.5685	3.AD/2.MCI	Neural Stem
ENSG00000145335	SNCA	0.733739	5.80085	0.137033	0.5687	2.MCI/1.YC	Neural Stem
ENSG00000134323	MYCN	-0.867052	2.14384	0.138316	0.5716	1.YC/0.HA	Immature
ENSG00000115355	CCDC88A	0.453969	8.39789	0.139234	0.5716	1.YC/0.HA	Immature
ENSG00000165806	CASP7	1.7662	1.75023	0.139413	0.5716	1.YC/0.HA	Immature
ENSG00000100697	DICER1	0.481337	7.09532	0.138634	0.5716	1.YC/0.HA	Immature
ENSG00000168610	STAT3	0.534169	5.23865	0.13867	0.5716	1.YC/0.HA	Immature
ENSG00000171885	AQP4	1.38604	5.85216	0.138494	0.5716	1.YC/0.HA	Immature
ENSG00000119689	DLST	-0.591655	4.138	0.13921	0.5716	2.MCI/0.HA	Immature
ENSG00000155511	GRIA1	0.55195	10.4902	0.139353	0.5716	3.AD/0.HA	Immature
ENSG00000113758	DBN1			0.139455	0.5716	Diagnosis	Neural Stem
ENSG00000185920	PTCH1	0.727832	5.82162	0.137876	0.5716	1.YC/0.HA	Neural Stem
ENSG00000058335	RASGRF1	0.936392	4.1445	0.138623	0.5716	2.MCI/0.HA	Neural Stem
ENSG00000204305	AGER	-1.81178	1.38237	0.138548	0.5716	3.AD/0.HA	Neural Stem
ENSG00000154764	WNT7A	0.819241	3.16345	0.139195	0.5716	3.AD/2.MCI	Neural Stem
ENSG00000066468	FGFR2			0.138724	0.5716	Diagnosis	Neuroblast
ENSG00000182220	ATP6AP2	-1.2374	6.95024	0.13918	0.5716	3.AD/0.HA	Neuroblast
ENSG00000091140	DLD	-1.23215	5.91082	0.13902	0.5716	3.AD/1.YC	Neuroblast
ENSG00000141644	MBD1	-1.4967	5.42092	0.139071	0.5716	3.AD/1.YC	Neuroblast
ENSG00000087470	DNM1L	-0.394837	6.78265	0.139907	0.5731	3.AD/1.YC	Neural Stem
ENSG00000114062	UBE3A	-0.577252	8.0843	0.140144	0.5736	1.YC/0.HA	Immature
ENSG00000104327	CALB1	-1.14912	1.32478	0.140416	0.5743	3.AD/0.HA	Neural Stem
ENSG00000121769	FABP3			0.140745	0.5749	Diagnosis	Neuroblast
ENSG00000072864	NDE1	0.841914	6.43271	0.140757	0.5749	3.AD/0.HA	Neuroblast
ENSG00000154928	EPHB1	-0.72454	7.97974	0.141833	0.5785	2.MCI/1.YC	Neural Stem
ENSG00000106278	PTPRZ1	-0.91977	9.62023	0.141839	0.5785	2.MCI/1.YC	Neural Stem
ENSG00000081479	LRP2			0.142217	0.5787	Diagnosis	Immature
ENSG00000176749	CDK5R1	-0.680349	5.54747	0.142084	0.5787	1.YC/0.HA	Immature
ENSG00000100097	LGALS1	-1.43726	3.44238	0.142312	0.5787	2.MCI/1.YC	Immature
ENSG00000137462	TLR2	-1.50981	3.39478	0.142262	0.5787	3.AD/1.YC	Immature
ENSG00000118785	SPP1	0.807834	7.59965	0.142475	0.579	3.AD/2.MCI	Neural Stem
ENSG00000188906	LRRK2	-1.27343	4.81747	0.142621	0.5791	3.AD/2.MCI	Immature
ENSG00000185920	PTCH1			0.142924	0.5791	Diagnosis	Neural Stem
ENSG00000140009	ESR2	0.850292	3.18392	0.142923	0.5791	3.AD/1.YC	Neural Stem
ENSG00000107562	CXCL12	-1.60082	3.52766	0.142923	0.5791	3.AD/2.MCI	Neural Stem
ENSG00000174808	BTC	1.09425	2.92994	0.143466	0.5796	2.MCI/0.HA	Immature
ENSG00000107562	CXCL12	-1.11401	1.4738	0.143336	0.5796	2.MCI/1.YC	Immature
ENSG00000119689	DLST	-0.65462	4.12136	0.14318	0.5796	2.MCI/1.YC	Immature
ENSG00000171316	CHD7	0.403685	7.76404	0.143461	0.5796	3.AD/0.HA	Neural Stem
ENSG00000135919	SERPINE2	-2.65657	3.58889	0.143775	0.58	3.AD/0.HA	Immature
ENSG00000110436	SLC1A2	-0.780348	10.7854	0.14374	0.58	3.AD/2.MCI	Neural Stem
ENSG00000132688	NES	-1.03574	1.1261	0.143979	0.5802	2.MCI/1.YC	Immature
ENSG00000102755	FLT1	-1.69574	2.39265	0.144018	0.5802	3.AD/0.HA	Neural Stem
ENSG00000205927	OLIG2	-2.14942	2.6985	0.144167	0.5804	2.MCI/1.YC	Immature
ENSG00000110092	CCND1			0.144336	0.5806	Diagnosis	Immature
ENSG00000136869	TLR4			0.144559	0.5811	Diagnosis	Neural Stem
ENSG00000176749	CDK5R1	1.24075	2.82482	0.144779	0.5812	1.YC/0.HA	Neural Stem
ENSG00000164342	TLR3	-1.62266	1.49066	0.144727	0.5812	3.AD/2.MCI	Neural Stem
ENSG00000152822	GRM1	1.16375	7.04573	0.14502	0.5813	3.AD/1.YC	Neuroblast
ENSG00000080815	PSEN1	-0.90092	8.0045	0.14491	0.5813	3.AD/1.YC	Neuroblast
ENSG00000168394	TAP1	-0.850322	1.46708	0.145521	0.5829	2.MCI/1.YC	Immature
ENSG00000138336	TET1			0.145933	0.5831	Diagnosis	Immature
ENSG00000106571	GLI3	1.47379	4.01546	0.145986	0.5831	1.YC/0.HA	Immature
ENSG00000067560	RHOA	-0.722911	5.14071	0.145836	0.5831	3.AD/0.HA	Immature
ENSG00000171791	BCL2	1.01037	8.0927	0.145755	0.5831	3.AD/2.MCI	Neuroblast
ENSG00000017427	IGF1	1.06243	3.81755	0.146119	0.5832	2.MCI/0.HA	Immature
ENSG00000163513	TGFBR2			0.14642	0.5838	Diagnosis	Immature
ENSG00000091140	DLD	-0.498243	5.33865	0.146479	0.5838	2.MCI/0.HA	Immature
ENSG00000096717	SIRT1	0.484616	4.53727	0.146761	0.584	1.YC/0.HA	Immature
ENSG00000169896	ITGAM	-1.96648	2.92898	0.146653	0.584	3.AD/1.YC	Immature
ENSG00000115758	ODC1	-1.02412	2.46173	0.146927	0.584	3.AD/2.MCI	Neural Stem
ENSG00000127152	BCL11B	1.22775	6.72209	0.146832	0.584	3.AD/1.YC	Neuroblast
ENSG00000130816	DNMT1	-1.02429	4.19416	0.147109	0.5843	3.AD/1.YC	Immature
ENSG00000122756	CNTFR			0.147465	0.5845	Diagnosis	Neural Stem
ENSG00000125266	EFNB2	0.471103	4.56049	0.147429	0.5845	3.AD/0.HA	Neural Stem
ENSG00000171316	CHD7	0.808053	8.14389	0.147462	0.5845	3.AD/0.HA	Neuroblast
ENSG00000141510	TP53			0.14765	0.5848	Diagnosis	Neural Stem
ENSG00000113578	FGF1	1.51586	4.14193	0.148128	0.5863	1.YC/0.HA	Immature
ENSG00000091136	LAMB1			0.14875	0.5883	Diagnosis	Immature
ENSG00000113580	NR3C1			0.149028	0.589	Diagnosis	Immature
ENSG00000187323	DCC	1.41512	6.23367	0.149154	0.5891	2.MCI/1.YC	Neural Stem
ENSG00000155511	GRIA1			0.150573	0.59	Diagnosis	Immature
ENSG00000159388	BTG2	-0.965891	3.46662	0.149764	0.59	1.YC/0.HA	Immature
ENSG00000070808	CAMK2A	-0.497305	8.25411	0.149638	0.59	1.YC/0.HA	Immature
ENSG00000173511	VEGFB	-0.578409	2.71961	0.150755	0.59	2.MCI/0.HA	Immature
ENSG00000164434	FABP7	-1.30121	3.8961	0.150755	0.59	3.AD/0.HA	Immature
ENSG00000113532	ST8SIA4	-1.44097	4.87697	0.150597	0.59	3.AD/1.YC	Immature
ENSG00000120265	PCMT1	-0.632549	6.16451	0.150232	0.59	3.AD/1.YC	Immature
ENSG00000168036	CTNNB1			0.15044	0.59	Diagnosis	Neural Stem
ENSG00000127152	BCL11B			0.150151	0.59	Diagnosis	Neural Stem
ENSG00000186951	PPARA	0.530735	6.16585	0.149688	0.59	1.YC/0.HA	Neural Stem
ENSG00000070808	CAMK2A	-0.742887	4.77907	0.150673	0.59	2.MCI/1.YC	Neural Stem
ENSG00000080815	PSEN1	-1.03984	8.22445	0.150476	0.59	2.MCI/1.YC	Neuroblast
ENSG00000105894	PTN	-0.788541	7.99206	0.150068	0.59	3.AD/1.YC	Neuroblast
ENSG00000118785	SPP1	1.37197	7.55717	0.151251	0.5916	3.AD/1.YC	Neural Stem
ENSG00000120907	ADRA1A	-0.398697	7.20046	0.15168	0.5928	3.AD/1.YC	Neural Stem
ENSG00000110092	CCND1	-0.954808	1.94236	0.152133	0.5942	2.MCI/1.YC	Immature
ENSG00000104327	CALB1	1.97406	6.08426	0.1526	0.5943	2.MCI/1.YC	Immature
ENSG00000132906	CASP9	-0.584939	4.37805	0.15234	0.5943	3.AD/2.MCI	Neural Stem
ENSG00000167552	TUBA1A	-0.967801	8.48929	0.152405	0.5943	2.MCI/1.YC	Neuroblast
ENSG00000121769	FABP3	-2.15436	5.49396	0.152539	0.5943	3.AD/2.MCI	Neuroblast
ENSG00000134250	NOTCH2	-1.48289	6.17856	0.152736	0.5945	3.AD/0.HA	Neuroblast
ENSG00000102468	HTR2A	-1.44617	6.24261	0.152897	0.5947	3.AD/1.YC	Neuroblast
ENSG00000124181	PLCG1			0.153151	0.5952	Diagnosis	Neural Stem
ENSG00000131095	GFAP	-1.22444	9.3066	0.153241	0.5952	1.YC/0.HA	Neural Stem
ENSG00000160307	S100B			0.15356	0.596	Diagnosis	Neuroblast
ENSG00000169057	MECP2	0.383116	6.21534	0.153848	0.5967	3.AD/0.HA	Neural Stem
ENSG00000137642	SORL1	-0.795366	7.94793	0.153967	0.5968	3.AD/1.YC	Neuroblast
ENSG00000181449	SOX2	1.35048	3.6304	0.154454	0.597	2.MCI/0.HA	Immature
ENSG00000081479	LRP2	-2.64165	3.65062	0.154482	0.597	3.AD/0.HA	Immature
ENSG00000138798	EGF	-5.93407	2.44031	0.154655	0.597	3.AD/0.HA	Immature
ENSG00000137710	RDX	0.373675	8.236	0.154414	0.597	3.AD/0.HA	Neural Stem
ENSG00000159388	BTG2	1.46704	6.09762	0.154554	0.597	2.MCI/1.YC	Neuroblast
ENSG00000154928	EPHB1	1.62733	7.07051	0.154412	0.597	2.MCI/1.YC	Neuroblast
ENSG00000148400	NOTCH1			0.155421	0.5977	Diagnosis	Immature
ENSG00000107331	ABCA2			0.155534	0.5977	Diagnosis	Immature
ENSG00000120088	CRHR1	-0.541	3.96365	0.155171	0.5977	1.YC/0.HA	Immature
ENSG00000182580	EPHB3	-1.60949	1.28621	0.155465	0.5977	2.MCI/1.YC	Immature
ENSG00000113580	NR3C1	-0.761975	7.61456	0.155769	0.5977	2.MCI/1.YC	Immature
ENSG00000118971	CCND2	-0.936871	4.23154	0.155094	0.5977	2.MCI/0.HA	Neural Stem
ENSG00000198947	DMD	0.51176	8.7872	0.1558	0.5977	3.AD/2.MCI	Neural Stem
ENSG00000160307	S100B	-0.943564	8.00862	0.155669	0.5977	2.MCI/0.HA	Neuroblast
ENSG00000100285	NEFH	-1.04975	6.9142	0.155744	0.5977	2.MCI/1.YC	Neuroblast
ENSG00000272398	CD24			0.15643	0.5981	Diagnosis	Immature
ENSG00000124181	PLCG1	-0.785686	4.05058	0.156346	0.5981	2.MCI/1.YC	Immature
ENSG00000164104	HMGB2	-0.919961	3.02176	0.156046	0.5981	1.YC/0.HA	Neural Stem
ENSG00000168214	RBPJ	0.402563	7.93973	0.156387	0.5981	3.AD/0.HA	Neural Stem
ENSG00000106018	VIPR2	0.974228	2.13529	0.156119	0.5981	3.AD/0.HA	Neural Stem
ENSG00000142208	AKT1	0.618854	3.10931	0.156712	0.5988	3.AD/2.MCI	Neural Stem
ENSG00000082701	GSK3B	-0.55875	7.95881	0.157005	0.5995	2.MCI/0.HA	Immature
ENSG00000159593	NAE1			0.157331	0.6	Diagnosis	Neural Stem
ENSG00000116106	EPHA4	0.702052	7.68051	0.157366	0.6	1.YC/0.HA	Neuroblast
ENSG00000104327	CALB1	0.650616	6.44439	0.158278	0.6005	3.AD/0.HA	Immature
ENSG00000154928	EPHB1	0.598724	7.46204	0.157624	0.6005	2.MCI/0.HA	Neural Stem
ENSG00000030582	GRN	-1.23711	3.33772	0.15811	0.6005	2.MCI/0.HA	Neural Stem
ENSG00000240972	MIF	-0.997892	5.68913	0.158444	0.6005	2.MCI/0.HA	Neural Stem
ENSG00000171094	ALK	-0.427233	5.97669	0.1585	0.6005	3.AD/0.HA	Neural Stem
ENSG00000173406	DAB1	0.70233	7.07798	0.15856	0.6005	3.AD/2.MCI	Neural Stem
ENSG00000162998	FRZB	-1.28766	2.91887	0.15838	0.6005	3.AD/2.MCI	Neural Stem
ENSG00000080815	PSEN1	0.877889	8.04083	0.157755	0.6005	1.YC/0.HA	Neuroblast
ENSG00000133639	BTG1	-0.837692	6.99952	0.158453	0.6005	2.MCI/0.HA	Neuroblast
ENSG00000141644	MBD1	1.01212	5.67516	0.158349	0.6005	2.MCI/0.HA	Neuroblast
ENSG00000133216	EPHB2	0.546349	4.94185	0.159035	0.6007	1.YC/0.HA	Immature
ENSG00000273079	GRIN2B	0.708267	9.86796	0.158873	0.6007	3.AD/1.YC	Immature
ENSG00000169057	MECP2			0.159009	0.6007	Diagnosis	Neural Stem
ENSG00000112242	E2F3	-0.752702	5.59281	0.158759	0.6007	2.MCI/1.YC	Neural Stem
ENSG00000121853	GHSR	1.97043	2.52157	0.159714	0.6025	3.AD/2.MCI	Immature
ENSG00000169562	GJB1	1.12335	3.3164	0.159663	0.6025	3.AD/2.MCI	Neural Stem
ENSG00000146425	DYNLT1	-0.591392	4.56969	0.159994	0.603	3.AD/0.HA	Neural Stem
ENSG00000100285	NEFH	-2.29015	5.86841	0.160071	0.603	3.AD/0.HA	Neuroblast
ENSG00000171094	ALK	1.81615	5.38628	0.160441	0.604	3.AD/1.YC	Neuroblast
ENSG00000105894	PTN	-0.392905	7.87005	0.160568	0.6041	3.AD/2.MCI	Neural Stem
ENSG00000164104	HMGB2	-5.15317	2.39293	0.161239	0.6054	3.AD/2.MCI	Immature
ENSG00000170345	FOS	-0.614441	4.46182	0.161227	0.6054	3.AD/2.MCI	Neural Stem
ENSG00000168610	STAT3	0.854743	6.81265	0.161122	0.6054	3.AD/0.HA	Neuroblast
ENSG00000168214	RBPJ	0.4078	7.95995	0.161484	0.6059	3.AD/1.YC	Neural Stem
ENSG00000109320	NFKB1			0.161751	0.6065	Diagnosis	Neural Stem
ENSG00000109320	NFKB1			0.162105	0.6068	Diagnosis	Immature
ENSG00000151012	SLC7A11	-0.388535	8.56643	0.162225	0.6068	3.AD/0.HA	Neural Stem
ENSG00000099860	GADD45B	-1.23932	3.09285	0.162259	0.6068	3.AD/2.MCI	Neural Stem
ENSG00000166949	SMAD3	0.865107	5.90882	0.161961	0.6068	1.YC/0.HA	Neuroblast
ENSG00000153094	BCL2L11	0.957124	3.7559	0.162515	0.6069	2.MCI/0.HA	Neural Stem
ENSG00000152822	GRM1			0.162493	0.6069	Diagnosis	Neuroblast
ENSG00000171885	AQP4			0.162633	0.607	Diagnosis	Immature
ENSG00000196712	NF1	-0.674268	8.3884	0.163076	0.6082	3.AD/1.YC	Immature
ENSG00000196411	EPHB4			0.163314	0.6083	Diagnosis	Neural Stem
ENSG00000113140	SPARC	0.974447	6.82127	0.163262	0.6083	3.AD/2.MCI	Neuroblast
ENSG00000077782	FGFR1			0.163666	0.6092	Diagnosis	Neuroblast
ENSG00000162946	DISC1	0.752383	7.51694	0.16381	0.6093	1.YC/0.HA	Neuroblast
ENSG00000117707	PROX1			0.16419	0.6101	Diagnosis	Neural Stem
ENSG00000129245	FXR2	0.642158	3.42602	0.164235	0.6101	1.YC/0.HA	Neural Stem
ENSG00000182580	EPHB3	-1.5058	1.64211	0.164923	0.6123	3.AD/1.YC	Neural Stem
ENSG00000117707	PROX1			0.165458	0.613	Diagnosis	Immature
ENSG00000164305	CASP3	-1.20491	4.48957	0.165372	0.613	3.AD/2.MCI	Immature
ENSG00000135446	CDK4	0.589445	3.19044	0.165371	0.613	3.AD/0.HA	Neural Stem
ENSG00000149295	DRD2	-5.51402	2.61723	0.16561	0.6132	3.AD/2.MCI	Immature
ENSG00000159593	NAE1	0.405547	5.36129	0.165878	0.6138	3.AD/0.HA	Neural Stem
ENSG00000173039	RELA	-5.61634	2.67229	0.166373	0.6152	3.AD/2.MCI	Immature
ENSG00000170214	ADRA1B	-0.6441	5.70949	0.166665	0.6153	1.YC/0.HA	Immature
ENSG00000197921	HES5	-3.77312	0.496983	0.16727	0.6153	2.MCI/0.HA	Immature
ENSG00000007062	PROM1	-5.65329	2.74356	0.167216	0.6153	3.AD/2.MCI	Immature
ENSG00000078725	BRINP1	-0.596143	7.44644	0.166877	0.6153	3.AD/0.HA	Neural Stem
ENSG00000109320	NFKB1	0.398192	7.15851	0.166829	0.6153	3.AD/1.YC	Neural Stem
ENSG00000137710	RDX	0.440158	8.21066	0.166583	0.6153	3.AD/2.MCI	Neural Stem
ENSG00000101439	CST3	-0.904129	9.01971	0.167273	0.6153	3.AD/0.HA	Neuroblast
ENSG00000137764	MAP2K5	-0.789018	7.64707	0.167018	0.6153	2.MCI/1.YC	Neuroblast
ENSG00000153094	BCL2L11	0.845533	3.66633	0.167525	0.6154	3.AD/0.HA	Neural Stem
ENSG00000096717	SIRT1	0.502456	5.42138	0.167495	0.6154	3.AD/0.HA	Neural Stem
ENSG00000155511	GRIA1	-0.721064	10.0532	0.168455	0.6169	1.YC/0.HA	Immature
ENSG00000122585	NPY	-5.83562	2.8787	0.16845	0.6169	3.AD/2.MCI	Immature
ENSG00000138795	LEF1	-0.934218	3.98337	0.168412	0.6169	3.AD/0.HA	Neural Stem
ENSG00000113578	FGF1	0.67092	7.32908	0.168488	0.6169	2.MCI/1.YC	Neural Stem
ENSG00000058335	RASGRF1			0.168249	0.6169	Diagnosis	Neuroblast
ENSG00000132639	SNAP25	-0.473719	9.75409	0.168766	0.6174	3.AD/0.HA	Immature
ENSG00000115758	ODC1	-1.62669	2.62053	0.169155	0.6174	3.AD/1.YC	Immature
ENSG00000074047	GLI2			0.169021	0.6174	Diagnosis	Neural Stem
ENSG00000157240	FZD1	1.50144	1.88753	0.169138	0.6174	1.YC/0.HA	Neural Stem
ENSG00000131095	GFAP	4.09113	8.70503	0.169011	0.6174	3.AD/1.YC	Neuroblast
ENSG00000154928	EPHB1	-0.661916	5.78088	0.170336	0.6177	2.MCI/0.HA	Immature
ENSG00000130203	APOE	-1.8292	5.19145	0.170639	0.6177	3.AD/0.HA	Immature
ENSG00000164104	HMGB2	-7.27534	1.99423	0.170369	0.6177	3.AD/1.YC	Immature
ENSG00000117480	FAAH	-2.4246	3.60242	0.170671	0.6177	3.AD/2.MCI	Immature
ENSG00000169083	AR	-2.54306	3.70141	0.170542	0.6177	3.AD/2.MCI	Immature
ENSG00000102003	SYP	-0.518016	4.22228	0.170309	0.6177	2.MCI/0.HA	Neural Stem
ENSG00000107562	CXCL12	-1.39444	3.70932	0.169676	0.6177	3.AD/0.HA	Neural Stem
ENSG00000106018	VIPR2	0.872202	2.23909	0.169578	0.6177	3.AD/1.YC	Neural Stem
ENSG00000137462	TLR2			0.170487	0.6177	Diagnosis	Neuroblast
ENSG00000118432	CNR1	-1.03255	6.33399	0.169897	0.6177	3.AD/2.MCI	Neuroblast
ENSG00000138336	TET1	1.40385	6.35163	0.170589	0.6177	3.AD/2.MCI	Neuroblast
ENSG00000205927	OLIG2	1.22675	6.4678	0.169773	0.6177	3.AD/2.MCI	Neuroblast
ENSG00000100285	NEFH	-2.29559	6.18127	0.170061	0.6177	3.AD/2.MCI	Neuroblast
ENSG00000169562	GJB1			0.171257	0.6179	Diagnosis	Immature
ENSG00000142949	PTPRF	-0.874112	5.08309	0.171497	0.6179	2.MCI/1.YC	Immature
ENSG00000073756	PTGS2	-7.12025	1.88012	0.171468	0.6179	3.AD/1.YC	Immature
ENSG00000113494	PRLR	-7.15649	1.88337	0.171434	0.6179	3.AD/1.YC	Immature
ENSG00000112312	GMNN	-7.19985	1.93256	0.17094	0.6179	3.AD/1.YC	Immature
ENSG00000139352	ASCL1	-7.13349	1.87671	0.171504	0.6179	3.AD/1.YC	Immature
ENSG00000153094	BCL2L11			0.171496	0.6179	Diagnosis	Neural Stem
ENSG00000139287	TPH2	-7.11251	1.84335	0.171864	0.6188	3.AD/1.YC	Immature
ENSG00000105329	TGFB1	-5.34108	2.02685	0.172262	0.6199	3.AD/0.HA	Immature
ENSG00000183454	GRIN2A	-0.57868	10.0211	0.172832	0.6207	2.MCI/0.HA	Immature
ENSG00000058335	RASGRF1	-0.824114	5.92418	0.172997	0.6207	3.AD/2.MCI	Immature
ENSG00000074047	GLI2	0.58995	5.72786	0.173038	0.6207	1.YC/0.HA	Neural Stem
ENSG00000196712	NF1	-0.351396	8.67316	0.173153	0.6207	3.AD/1.YC	Neural Stem
ENSG00000116678	LEPR	1.12686	5.95287	0.173258	0.6207	3.AD/2.MCI	Neuroblast
ENSG00000112576	CCND3	1.12929	5.97891	0.173259	0.6207	3.AD/2.MCI	Neuroblast
ENSG00000141644	MBD1	-1.49468	5.87674	0.173252	0.6207	3.AD/2.MCI	Neuroblast
ENSG00000183454	GRIN2A	0.724597	10.1419	0.173849	0.6224	3.AD/2.MCI	Immature
ENSG00000115758	ODC1	-1.68907	2.93915	0.174504	0.6226	3.AD/0.HA	Immature
ENSG00000084093	REST	-5.15381	1.87927	0.174461	0.6226	3.AD/0.HA	Immature
ENSG00000157540	DYRK1A	0.697237	8.40076	0.174573	0.6226	3.AD/1.YC	Immature
ENSG00000146425	DYNLT1			0.174521	0.6226	Diagnosis	Neural Stem
ENSG00000127152	BCL11B	1.31874	2.85398	0.174209	0.6226	2.MCI/1.YC	Neural Stem
ENSG00000167552	TUBA1A	-0.946204	8.64879	0.174444	0.6226	2.MCI/0.HA	Neuroblast
ENSG00000100968	NFATC4	1.27625	1.05822	0.174695	0.6227	1.YC/0.HA	Immature
ENSG00000136869	TLR4	-6.49515	2.69316	0.175222	0.6238	3.AD/0.HA	Immature
ENSG00000127152	BCL11B			0.175549	0.6238	Diagnosis	Neuroblast
ENSG00000136535	TBR1	0.795623	5.61247	0.175581	0.6238	1.YC/0.HA	Neuroblast
ENSG00000131437	KIF3A	-1.09839	7.60683	0.175357	0.6238	3.AD/2.MCI	Neuroblast
ENSG00000167552	TUBA1A	0.864841	8.56579	0.175277	0.6238	3.AD/2.MCI	Neuroblast
ENSG00000122756	CNTFR			0.176533	0.6239	Diagnosis	Immature
ENSG00000136535	TBR1	-1.12204	4.13051	0.176475	0.6239	3.AD/0.HA	Immature
ENSG00000077279	DCX	-1.1362	4.05743	0.175796	0.6239	3.AD/0.HA	Immature
ENSG00000109320	NFKB1	0.803351	6.51871	0.176783	0.6239	3.AD/2.MCI	Immature
ENSG00000067182	TNFRSF1A	-6.41848	3.29011	0.176683	0.6239	3.AD/2.MCI	Immature
ENSG00000081479	LRP2	0.988538	7.46957	0.176572	0.6239	3.AD/0.HA	Neural Stem
ENSG00000118971	CCND2	0.676637	4.08881	0.17646	0.6239	3.AD/2.MCI	Neural Stem
ENSG00000168398	BDKRB2	-1.4119	1.79719	0.176613	0.6239	3.AD/2.MCI	Neural Stem
ENSG00000102003	SYP			0.176088	0.6239	Diagnosis	Neuroblast
ENSG00000145335	SNCA	-1.14541	7.69011	0.176816	0.6239	3.AD/2.MCI	Neuroblast
ENSG00000087470	DNM1L	-1.02509	7.63331	0.175835	0.6239	3.AD/2.MCI	Neuroblast
ENSG00000149295	DRD2	-2.87453	1.51717	0.176945	0.624	3.AD/2.MCI	Neural Stem
ENSG00000120251	GRIA2	-0.527494	10.4348	0.177166	0.6244	1.YC/0.HA	Immature
ENSG00000181449	SOX2	-0.421886	6.58733	0.177497	0.6251	3.AD/1.YC	Neural Stem
ENSG00000180398	MCFD2			0.177617	0.6252	Diagnosis	Neuroblast
ENSG00000162490	DRAXIN	-1.58392	1.07652	0.177801	0.6254	2.MCI/0.HA	Immature
ENSG00000125266	EFNB2	-0.564449	4.97321	0.177966	0.6256	3.AD/1.YC	Neural Stem
ENSG00000134250	NOTCH2			0.178091	0.6257	Diagnosis	Neural Stem
ENSG00000113368	LMNB1	0.704087	2.07606	0.178374	0.6259	3.AD/0.HA	Neural Stem
ENSG00000151067	CACNA1C	0.690755	7.59128	0.178276	0.6259	2.MCI/1.YC	Neural Stem
ENSG00000147246	HTR2C	-6.86744	3.09311	0.17879	0.6269	3.AD/0.HA	Immature
ENSG00000128683	GAD1	-1.65847	2.64402	0.179059	0.6275	2.MCI/1.YC	Neural Stem
ENSG00000175387	SMAD2	0.37961	6.52702	0.179344	0.6281	1.YC/0.HA	Immature
ENSG00000151012	SLC7A11	-0.520966	8.64656	0.179798	0.6293	3.AD/2.MCI	Neural Stem
ENSG00000155368	DBI	-2.09842	4.17041	0.17998	0.6295	3.AD/2.MCI	Immature
ENSG00000113070	HBEGF	0.954052	1.57626	0.18017	0.6297	1.YC/0.HA	Immature
ENSG00000141644	MBD1	1.02275	5.25787	0.180241	0.6297	1.YC/0.HA	Neuroblast
ENSG00000165795	NDRG2	-1.81648	3.77453	0.180574	0.6302	3.AD/0.HA	Immature
ENSG00000102003	SYP	-0.683674	4.20382	0.180611	0.6302	2.MCI/1.YC	Neural Stem
ENSG00000135638	EMX1	-1.80703	2.77058	0.181061	0.6313	3.AD/1.YC	Immature
ENSG00000077782	FGFR1	1.31354	6.72609	0.181147	0.6313	2.MCI/1.YC	Neuroblast
ENSG00000128595	CALU	0.546346	5.76335	0.181839	0.6333	2.MCI/0.HA	Immature
ENSG00000138798	EGF	-0.705636	5.07516	0.182177	0.6341	3.AD/0.HA	Neural Stem
ENSG00000166949	SMAD3			0.182549	0.635	Diagnosis	Neuroblast
ENSG00000087470	DNM1L	-0.824664	7.31549	0.18281	0.6355	3.AD/0.HA	Neuroblast
ENSG00000058335	RASGRF1			0.183801	0.6376	Diagnosis	Immature
ENSG00000183454	GRIN2A			0.183536	0.6376	Diagnosis	Immature
ENSG00000173404	INSM1			0.184536	0.6376	Diagnosis	Immature
ENSG00000187323	DCC	-0.625134	9.95323	0.184517	0.6376	1.YC/0.HA	Immature
ENSG00000151790	TDO2	0.991389	5.01254	0.184101	0.6376	3.AD/1.YC	Immature
ENSG00000185920	PTCH1	-1.63405	4.64549	0.184423	0.6376	3.AD/2.MCI	Immature
ENSG00000160307	S100B	-0.499421	7.415	0.184155	0.6376	3.AD/0.HA	Neural Stem
ENSG00000128595	CALU	-0.405582	5.41406	0.184261	0.6376	3.AD/1.YC	Neural Stem
ENSG00000189403	HMGB1	0.404254	8.17299	0.183922	0.6376	3.AD/1.YC	Neural Stem
ENSG00000072864	NDE1	0.940274	6.63731	0.184221	0.6376	2.MCI/0.HA	Neuroblast
ENSG00000166949	SMAD3			0.18503	0.6385	Diagnosis	Neural Stem
ENSG00000146425	DYNLT1	-0.667604	4.58796	0.184921	0.6385	1.YC/0.HA	Neural Stem
ENSG00000102468	HTR2A	-1.22281	6.50992	0.185228	0.6388	2.MCI/1.YC	Neuroblast
ENSG00000134363	FST	2.74769	1.21793	0.185541	0.6391	3.AD/1.YC	Immature
ENSG00000101439	CST3	0.461081	9.42081	0.185561	0.6391	1.YC/0.HA	Neural Stem
ENSG00000162946	DISC1	0.645438	6.57645	0.185729	0.6393	3.AD/2.MCI	Immature
ENSG00000112038	OPRM1	-0.993212	4.3147	0.186839	0.6402	2.MCI/0.HA	Immature
ENSG00000149294	NCAM1	-0.630649	9.18859	0.186539	0.6402	3.AD/1.YC	Immature
ENSG00000077279	DCX			0.187022	0.6402	Diagnosis	Neural Stem
ENSG00000198576	ARC	-2.48824	1.14687	0.186251	0.6402	2.MCI/0.HA	Neural Stem
ENSG00000133794	ARNTL	0.618031	5.85912	0.186218	0.6402	2.MCI/0.HA	Neural Stem
ENSG00000087470	DNM1L	-0.350719	6.8497	0.186882	0.6402	3.AD/0.HA	Neural Stem
ENSG00000196411	EPHB4	-1.18971	1.79653	0.18656	0.6402	3.AD/1.YC	Neural Stem
ENSG00000164434	FABP7	-1.48499	3.52485	0.186393	0.6402	3.AD/2.MCI	Neural Stem
ENSG00000007168	PAFAH1B1	-0.724715	8.4977	0.186967	0.6402	3.AD/1.YC	Neuroblast
ENSG00000166949	SMAD3	0.937371	6.1181	0.187152	0.6403	3.AD/0.HA	Neuroblast
ENSG00000165060	FXN	0.375865	4.66308	0.187677	0.6411	3.AD/0.HA	Neural Stem
ENSG00000142949	PTPRF	0.393008	5.97803	0.18773	0.6411	3.AD/2.MCI	Neural Stem
ENSG00000096717	SIRT1	-1.242	5.82932	0.187661	0.6411	3.AD/1.YC	Neuroblast
ENSG00000165795	NDRG2			0.188169	0.6414	Diagnosis	Immature
ENSG00000115353	TACR1	-2.47687	3.42841	0.18799	0.6414	3.AD/1.YC	Immature
ENSG00000100697	DICER1	0.394966	8.0583	0.18807	0.6414	3.AD/2.MCI	Neural Stem
ENSG00000102879	CORO1A			0.188911	0.6436	Diagnosis	Immature
ENSG00000168214	RBPJ	0.391216	7.18595	0.18943	0.6449	1.YC/0.HA	Immature
ENSG00000160789	LMNA	0.672737	4.95408	0.189516	0.6449	2.MCI/1.YC	Neural Stem
ENSG00000100697	DICER1	-0.742922	7.13423	0.189972	0.6455	3.AD/2.MCI	Immature
ENSG00000162490	DRAXIN			0.189987	0.6455	Diagnosis	Neural Stem
ENSG00000155368	DBI	1.35258	6.95999	0.190043	0.6455	2.MCI/1.YC	Neuroblast
ENSG00000117480	FAAH			0.190363	0.6461	Diagnosis	Neural Stem
ENSG00000111728	ST8SIA1	0.671208	7.49817	0.190441	0.6461	2.MCI/1.YC	Neural Stem
ENSG00000120833	SOCS2	-1.92717	2.89369	0.191305	0.6486	3.AD/1.YC	Immature
ENSG00000106018	VIPR2			0.192189	0.6489	Diagnosis	Immature
ENSG00000113368	LMNB1	-0.630313	3.02302	0.191564	0.6489	2.MCI/1.YC	Immature
ENSG00000136827	TOR1A	-1.86872	2.8476	0.192189	0.6489	3.AD/1.YC	Immature
ENSG00000054179	ENTPD2	-0.984286	3.66399	0.192148	0.6489	3.AD/1.YC	Neural Stem
ENSG00000142949	PTPRF	0.614904	6.41719	0.192195	0.6489	1.YC/0.HA	Neuroblast
ENSG00000171552	BCL2L1	0.594735	6.43019	0.192122	0.6489	1.YC/0.HA	Neuroblast
ENSG00000120907	ADRA1A	1.46001	6.48976	0.191966	0.6489	3.AD/1.YC	Neuroblast
ENSG00000162946	DISC1			0.192335	0.649	Diagnosis	Immature
ENSG00000148053	NTRK2	-0.983579	8.90288	0.192687	0.6498	2.MCI/1.YC	Neuroblast
ENSG00000114062	UBE3A	-0.392094	7.31863	0.192845	0.6499	3.AD/1.YC	Neural Stem
ENSG00000112964	GHR	-0.514487	6.25255	0.193138	0.6505	3.AD/1.YC	Immature
ENSG00000007062	PROM1	-1.62897	2.0828	0.193264	0.6505	2.MCI/1.YC	Neural Stem
ENSG00000185920	PTCH1	-1.31957	4.36939	0.193705	0.6513	3.AD/0.HA	Immature
ENSG00000151067	CACNA1C			0.193728	0.6513	Diagnosis	Neural Stem
ENSG00000119138	KLF9	-0.395414	6.18846	0.19386	0.6514	3.AD/0.HA	Neural Stem
ENSG00000113532	ST8SIA4			0.194363	0.6515	Diagnosis	Immature
ENSG00000171791	BCL2			0.194341	0.6515	Diagnosis	Immature
ENSG00000176165	FOXG1	-0.731884	6.39109	0.19404	0.6515	2.MCI/1.YC	Neuroblast
ENSG00000151067	CACNA1C	0.901416	8.48502	0.194245	0.6515	3.AD/2.MCI	Neuroblast
ENSG00000124766	SOX4	-1.61906	2.78956	0.194727	0.6521	2.MCI/1.YC	Immature
ENSG00000159388	BTG2	1.00204	6.1444	0.194778	0.6521	2.MCI/0.HA	Neuroblast
ENSG00000138795	LEF1	-1.29324	1.03556	0.195318	0.6525	2.MCI/0.HA	Immature
ENSG00000087470	DNM1L	-0.787906	6.92383	0.195382	0.6525	3.AD/1.YC	Immature
ENSG00000137710	RDX			0.195583	0.6525	Diagnosis	Neural Stem
ENSG00000111728	ST8SIA1	-0.856942	7.66349	0.195163	0.6525	1.YC/0.HA	Neural Stem
ENSG00000159388	BTG2	1.00896	5.98796	0.195286	0.6525	3.AD/0.HA	Neuroblast
ENSG00000091140	DLD	-1.22143	6.0195	0.195461	0.6525	3.AD/0.HA	Neuroblast
ENSG00000135919	SERPINE2	-0.741989	7.47753	0.195824	0.6529	2.MCI/1.YC	Neural Stem
ENSG00000157240	FZD1	-1.52934	2.01935	0.196198	0.6538	3.AD/1.YC	Neural Stem
ENSG00000132639	SNAP25			0.196824	0.6553	Diagnosis	Neuroblast
ENSG00000067560	RHOA	-0.814139	7.03973	0.196889	0.6553	2.MCI/0.HA	Neuroblast
ENSG00000162946	DISC1	0.933237	6.44545	0.19718	0.6559	2.MCI/1.YC	Neural Stem
ENSG00000151090	THRB	-0.508808	7.87806	0.197419	0.6563	3.AD/2.MCI	Neural Stem
ENSG00000181449	SOX2	-0.48997	7.09502	0.19763	0.6566	2.MCI/0.HA	Neural Stem
ENSG00000149294	NCAM1	-0.468294	9.20343	0.197916	0.6568	3.AD/0.HA	Immature
ENSG00000096696	DSP	1.9802	2.92733	0.197855	0.6568	3.AD/0.HA	Neural Stem
ENSG00000134259	NGF	1.53499	3.43437	0.198354	0.6578	2.MCI/0.HA	Neural Stem
ENSG00000159110	IFNAR2	-0.584162	5.33625	0.198728	0.6587	2.MCI/1.YC	Immature
ENSG00000142192	APP	0.428757	9.12145	0.198869	0.6588	3.AD/2.MCI	Neural Stem
ENSG00000169057	MECP2	0.885894	6.97312	0.199205	0.6591	2.MCI/0.HA	Neuroblast
ENSG00000113578	FGF1	0.658345	7.19903	0.199204	0.6591	3.AD/2.MCI	Neuroblast
ENSG00000130816	DNMT1	1.14481	6.54367	0.199431	0.6595	2.MCI/0.HA	Neuroblast
ENSG00000187323	DCC	0.935144	6.24246	0.199775	0.6602	2.MCI/0.HA	Neural Stem
ENSG00000116678	LEPR	0.998632	6.54949	0.200784	0.6628	2.MCI/1.YC	Immature
ENSG00000180398	MCFD2	-0.846047	4.30628	0.200696	0.6628	3.AD/1.YC	Immature
ENSG00000183454	GRIN2A	-0.503215	10.0191	0.201095	0.6634	1.YC/0.HA	Immature
ENSG00000170214	ADRA1B			0.20146	0.6636	Diagnosis	Immature
ENSG00000185920	PTCH1			0.201788	0.6636	Diagnosis	Immature
ENSG00000164305	CASP3	0.625614	4.31859	0.20185	0.6636	2.MCI/0.HA	Immature
ENSG00000151067	CACNA1C	0.643938	9.64388	0.201617	0.6636	3.AD/1.YC	Immature
ENSG00000167325	RRM1	-0.665685	3.85936	0.201489	0.6636	3.AD/2.MCI	Neural Stem
ENSG00000168959	GRM5	0.673098	8.20534	0.201985	0.6636	1.YC/0.HA	Neuroblast
ENSG00000160307	S100B	-1.02332	7.85412	0.201838	0.6636	1.YC/0.HA	Neuroblast
ENSG00000133216	EPHB2	-1.27287	5.67338	0.202213	0.664	3.AD/1.YC	Neuroblast
ENSG00000096696	DSP	-2.3035	1.19111	0.202406	0.6642	1.YC/0.HA	Neural Stem
ENSG00000138798	EGF	-0.640121	5.01011	0.202598	0.6645	3.AD/2.MCI	Neural Stem
ENSG00000073282	TP63			0.20277	0.6646	Diagnosis	Immature
ENSG00000147246	HTR2C			0.203344	0.6654	Diagnosis	Neural Stem
ENSG00000151067	CACNA1C	-0.526249	7.39689	0.203354	0.6654	3.AD/0.HA	Neural Stem
ENSG00000168398	BDKRB2	2.19366	1.47908	0.20323	0.6654	2.MCI/1.YC	Neural Stem
ENSG00000198793	MTOR	-1.19762	6.20639	0.203478	0.6654	3.AD/1.YC	Neuroblast
ENSG00000185122	HSF1	0.461432	3.49234	0.204985	0.6656	1.YC/0.HA	Immature
ENSG00000113657	DPYSL3	-0.817822	4.04473	0.20522	0.6656	2.MCI/0.HA	Immature
ENSG00000106278	PTPRZ1	-0.499772	8.21139	0.2042	0.6656	2.MCI/0.HA	Immature
ENSG00000165060	FXN	-0.418481	4.51836	0.204212	0.6656	2.MCI/0.HA	Immature
ENSG00000112333	NR2E1	-0.908786	1.60608	0.20531	0.6656	2.MCI/1.YC	Immature
ENSG00000115355	CCDC88A			0.204493	0.6656	Diagnosis	Neural Stem
ENSG00000144476	ACKR3	-0.81397	4.62665	0.203884	0.6656	1.YC/0.HA	Neural Stem
ENSG00000107779	BMPR1A	0.510624	8.41455	0.2052	0.6656	1.YC/0.HA	Neural Stem
ENSG00000100968	NFATC4	-0.769207	3.7687	0.20371	0.6656	2.MCI/1.YC	Neural Stem
ENSG00000188895	MSL1	-0.491576	5.17544	0.205262	0.6656	3.AD/1.YC	Neural Stem
ENSG00000148180	GSN	0.374387	7.90387	0.204783	0.6656	3.AD/2.MCI	Neural Stem
ENSG00000124181	PLCG1	-0.586921	5.77811	0.205308	0.6656	3.AD/2.MCI	Neural Stem
ENSG00000273079	GRIN2B			0.204777	0.6656	Diagnosis	Neuroblast
ENSG00000131095	GFAP			0.205075	0.6656	Diagnosis	Neuroblast
ENSG00000102081	FMR1	-0.86484	6.20995	0.205058	0.6656	2.MCI/0.HA	Neuroblast
ENSG00000169057	MECP2	0.370383	6.23816	0.205559	0.666	3.AD/1.YC	Neural Stem
ENSG00000133794	ARNTL	0.463476	5.14279	0.205887	0.6667	1.YC/0.HA	Immature
ENSG00000113657	DPYSL3	-0.637297	7.31085	0.206448	0.6681	3.AD/0.HA	Neural Stem
ENSG00000102003	SYP	-0.419741	6.2666	0.206815	0.6686	1.YC/0.HA	Immature
ENSG00000170345	FOS	-5.78908	2.35924	0.206913	0.6686	3.AD/0.HA	Immature
ENSG00000164305	CASP3	-0.757589	3.93829	0.207423	0.6686	3.AD/1.YC	Immature
ENSG00000198793	MTOR	0.47316	5.70398	0.207108	0.6686	1.YC/0.HA	Neural Stem
ENSG00000133216	EPHB2	0.637042	4.36741	0.207189	0.6686	2.MCI/0.HA	Neural Stem
ENSG00000112576	CCND3	0.71795	6.13668	0.207357	0.6686	2.MCI/0.HA	Neural Stem
ENSG00000142166	IFNAR1	-0.473545	5.2492	0.207163	0.6686	3.AD/1.YC	Neural Stem
ENSG00000171885	AQP4	-0.626951	9.27851	0.207581	0.6687	2.MCI/0.HA	Neural Stem
ENSG00000102755	FLT1			0.208086	0.6693	Diagnosis	Immature
ENSG00000148180	GSN	1.1524	5.19727	0.208296	0.6693	1.YC/0.HA	Immature
ENSG00000124766	SOX4	-5.12258	1.88215	0.208358	0.6693	3.AD/0.HA	Immature
ENSG00000166579	NDEL1	-0.70491	5.00814	0.208069	0.6693	3.AD/1.YC	Immature
ENSG00000130203	APOE			0.208104	0.6693	Diagnosis	Neuroblast
ENSG00000134250	NOTCH2	-0.427454	6.87068	0.208821	0.67	3.AD/0.HA	Neural Stem
ENSG00000125266	EFNB2	-0.959278	5.59616	0.208823	0.67	3.AD/0.HA	Neuroblast
ENSG00000159110	IFNAR2			0.209195	0.6707	Diagnosis	Immature
ENSG00000146425	DYNLT1	-0.765079	4.55017	0.209398	0.6707	2.MCI/0.HA	Neural Stem
ENSG00000139352	ASCL1	-0.848562	2.13341	0.20934	0.6707	2.MCI/1.YC	Neural Stem
ENSG00000007062	PROM1	1.07699	1.87587	0.209774	0.6712	3.AD/2.MCI	Neural Stem
ENSG00000171316	CHD7	0.678247	7.94971	0.209659	0.6712	1.YC/0.HA	Neuroblast
ENSG00000091831	ESR1	1.19497	3.296	0.210316	0.6725	2.MCI/1.YC	Neural Stem
ENSG00000144476	ACKR3	-0.68646	4.59815	0.210517	0.6728	2.MCI/0.HA	Neural Stem
ENSG00000073282	TP63	-0.794653	2.05295	0.210657	0.6729	1.YC/0.HA	Immature
ENSG00000182968	SOX1			0.211258	0.6733	Diagnosis	Immature
ENSG00000183454	GRIN2A	0.628108	10.1716	0.210935	0.6733	3.AD/1.YC	Immature
ENSG00000110436	SLC1A2	-0.721001	8.40474	0.211197	0.6733	3.AD/2.MCI	Immature
ENSG00000141510	TP53	-0.786138	4.49087	0.211133	0.6733	2.MCI/1.YC	Neural Stem
ENSG00000132386	SERPINF1	-1.82251	3.01372	0.211614	0.6738	3.AD/0.HA	Immature
ENSG00000168036	CTNNB1	-0.347608	6.53584	0.211783	0.6738	3.AD/0.HA	Neural Stem
ENSG00000176887	SOX11	1.5619	1.89062	0.21167	0.6738	3.AD/2.MCI	Neural Stem
ENSG00000082701	GSK3B	-0.916902	8.36208	0.211931	0.6739	2.MCI/1.YC	Neuroblast
ENSG00000142949	PTPRF			0.212249	0.6741	Diagnosis	Immature
ENSG00000162490	DRAXIN	-2.10827	1.29444	0.2122	0.6741	1.YC/0.HA	Neural Stem
ENSG00000171316	CHD7	0.394987	7.76442	0.212728	0.6753	3.AD/2.MCI	Neural Stem
ENSG00000141510	TP53	0.615322	4.56306	0.212924	0.6755	1.YC/0.HA	Neural Stem
ENSG00000125285	SOX21			0.213534	0.6763	Diagnosis	Immature
ENSG00000162490	DRAXIN	1.53045	1.12518	0.213326	0.6763	3.AD/1.YC	Neural Stem
ENSG00000112576	CCND3	-1.19946	5.81325	0.21348	0.6763	2.MCI/0.HA	Neuroblast
ENSG00000139287	TPH2			0.214629	0.6764	Diagnosis	Immature
ENSG00000100097	LGALS1			0.215262	0.6764	Diagnosis	Immature
ENSG00000137710	RDX	0.416759	6.57237	0.215083	0.6764	1.YC/0.HA	Immature
ENSG00000167552	TUBA1A	0.530653	6.62549	0.214918	0.6764	1.YC/0.HA	Immature
ENSG00000142208	AKT1	0.736792	2.67089	0.214867	0.6764	1.YC/0.HA	Immature
ENSG00000113368	LMNB1	-0.586872	3.0726	0.213768	0.6764	2.MCI/0.HA	Immature
ENSG00000125266	EFNB2	-0.955615	4.93399	0.214152	0.6764	3.AD/0.HA	Immature
ENSG00000080815	PSEN1			0.214095	0.6764	Diagnosis	Neural Stem
ENSG00000240972	MIF			0.214522	0.6764	Diagnosis	Neural Stem
ENSG00000134250	NOTCH2	0.531712	7.26592	0.214271	0.6764	1.YC/0.HA	Neural Stem
ENSG00000128052	KDR	-1.02763	1.83609	0.21456	0.6764	1.YC/0.HA	Neural Stem
ENSG00000138039	LHCGR	0.961681	3.51242	0.215253	0.6764	2.MCI/0.HA	Neural Stem
ENSG00000135446	CDK4	0.956803	3.18698	0.214686	0.6764	3.AD/2.MCI	Neural Stem
ENSG00000198947	DMD	0.779571	9.85794	0.214808	0.6764	3.AD/0.HA	Neuroblast
ENSG00000112964	GHR	-0.91942	6.18234	0.215561	0.677	3.AD/2.MCI	Neural Stem
ENSG00000151322	NPAS3	0.750518	10.4906	0.215694	0.677	3.AD/0.HA	Neuroblast
ENSG00000106278	PTPRZ1	1.27873	8.25073	0.216233	0.6784	2.MCI/1.YC	Neuroblast
ENSG00000109320	NFKB1	0.303217	7.17111	0.216428	0.6786	3.AD/0.HA	Neural Stem
ENSG00000077782	FGFR1	-0.419164	5.98468	0.216592	0.6787	3.AD/1.YC	Neural Stem
ENSG00000187266	EPOR	-0.847289	2.87557	0.216768	0.6788	3.AD/1.YC	Neural Stem
ENSG00000171867	PRNP	0.359329	6.38687	0.216874	0.6788	3.AD/2.MCI	Neural Stem
ENSG00000070831	CDC42			0.217242	0.6792	Diagnosis	Immature
ENSG00000026103	FAS	-1.34485	2.24625	0.217148	0.6792	2.MCI/1.YC	Immature
ENSG00000182580	EPHB3	1.42245	0.9948	0.217552	0.6796	1.YC/0.HA	Immature
ENSG00000151090	THRB	-0.743021	7.82261	0.217637	0.6796	2.MCI/0.HA	Immature
ENSG00000168394	TAP1	-0.644132	2.31791	0.217729	0.6796	3.AD/2.MCI	Neural Stem
ENSG00000134250	NOTCH2	0.689512	4.30677	0.217862	0.6797	2.MCI/0.HA	Immature
ENSG00000105329	TGFB1	-0.775166	3.49358	0.217987	0.6797	3.AD/0.HA	Neural Stem
ENSG00000175344	CHRNA7	0.523495	2.81638	0.218145	0.6798	3.AD/2.MCI	Neural Stem
ENSG00000152822	GRM1	0.927519	7.02702	0.218498	0.6805	2.MCI/0.HA	Neuroblast
ENSG00000169562	GJB1	1.41423	1.18119	0.219151	0.6818	1.YC/0.HA	Immature
ENSG00000017427	IGF1	1.73165	1.97715	0.219124	0.6818	3.AD/0.HA	Neural Stem
ENSG00000182968	SOX1	1.22707	1.1274	0.219619	0.6825	1.YC/0.HA	Immature
ENSG00000082701	GSK3B	-0.619066	7.9568	0.219521	0.6825	2.MCI/1.YC	Immature
ENSG00000132639	SNAP25	-0.9209	10.1781	0.219747	0.6825	2.MCI/1.YC	Neuroblast
ENSG00000138039	LHCGR			0.220628	0.6849	Diagnosis	Neural Stem
ENSG00000128564	VGF			0.220797	0.685	Diagnosis	Immature
ENSG00000148053	NTRK2	-0.671438	8.73785	0.221081	0.6855	3.AD/1.YC	Neuroblast
ENSG00000185920	PTCH1	-0.650172	5.86609	0.221346	0.6856	2.MCI/1.YC	Neural Stem
ENSG00000176165	FOXG1	-0.930362	6.58601	0.221333	0.6856	2.MCI/0.HA	Neuroblast
ENSG00000162946	DISC1			0.222019	0.6868	Diagnosis	Neural Stem
ENSG00000204305	AGER			0.22226	0.6868	Diagnosis	Neural Stem
ENSG00000100968	NFATC4	-0.736922	3.84517	0.222124	0.6868	2.MCI/0.HA	Neural Stem
ENSG00000070808	CAMK2A	-0.656044	4.76787	0.222106	0.6868	3.AD/1.YC	Neural Stem
ENSG00000115355	CCDC88A	0.749524	9.43992	0.222351	0.6868	1.YC/0.HA	Neuroblast
ENSG00000022355	GABRA1	0.506874	6.87461	0.223021	0.6878	1.YC/0.HA	Immature
ENSG00000115194	SLC30A3	0.878497	4.99798	0.22328	0.6878	2.MCI/1.YC	Immature
ENSG00000175344	CHRNA7	-0.798994	4.25529	0.223288	0.6878	3.AD/1.YC	Immature
ENSG00000168036	CTNNB1	-0.382466	6.56253	0.222981	0.6878	3.AD/2.MCI	Neural Stem
ENSG00000110436	SLC1A2	-0.923967	8.06684	0.223023	0.6878	3.AD/0.HA	Neuroblast
ENSG00000105329	TGFB1	-0.913312	3.46241	0.22374	0.6888	1.YC/0.HA	Neural Stem
ENSG00000174775	HRAS	-1.19567	2.71486	0.2239	0.689	2.MCI/0.HA	Neural Stem
ENSG00000115355	CCDC88A	0.362428	9.19453	0.224568	0.6906	3.AD/2.MCI	Neural Stem
ENSG00000125285	SOX21			0.225385	0.6922	Diagnosis	Neural Stem
ENSG00000130203	APOE	-0.470772	7.30952	0.225227	0.6922	3.AD/2.MCI	Neural Stem
ENSG00000137462	TLR2	-1.61349	5.63367	0.225447	0.6922	3.AD/0.HA	Neuroblast
ENSG00000138696	BMPR1B	0.980223	5.25757	0.226282	0.6933	2.MCI/0.HA	Immature
ENSG00000099860	GADD45B	1.00356	1.89722	0.22622	0.6933	2.MCI/0.HA	Immature
ENSG00000141510	TP53	-1.34682	2.24331	0.226294	0.6933	2.MCI/1.YC	Immature
ENSG00000240972	MIF	-0.966028	7.92787	0.226303	0.6933	3.AD/0.HA	Neuroblast
ENSG00000120907	ADRA1A	-0.954331	9.33433	0.226485	0.6935	2.MCI/0.HA	Immature
ENSG00000070831	CDC42	-0.894614	5.60277	0.226758	0.6936	3.AD/2.MCI	Immature
ENSG00000101384	JAG1	-0.672515	2.928	0.226641	0.6936	3.AD/1.YC	Neural Stem
ENSG00000131759	RARA	1.19963	2.10393	0.227218	0.6946	3.AD/1.YC	Neural Stem
ENSG00000113657	DPYSL3	0.587408	4.37997	0.22744	0.6949	1.YC/0.HA	Immature
ENSG00000138336	TET1	0.923657	6.06577	0.227588	0.695	3.AD/0.HA	Neuroblast
ENSG00000124762	CDKN1A	0.832415	1.79271	0.227881	0.6955	3.AD/1.YC	Neural Stem
ENSG00000112242	E2F3	0.452199	6.59958	0.228299	0.6964	2.MCI/0.HA	Immature
ENSG00000136827	TOR1A	-1.44331	2.76803	0.229202	0.6984	3.AD/0.HA	Immature
ENSG00000135446	CDK4			0.229106	0.6984	Diagnosis	Neural Stem
ENSG00000091136	LAMB1			0.229537	0.699	Diagnosis	Neural Stem
ENSG00000168610	STAT3	0.84725	7.1116	0.229931	0.6999	3.AD/2.MCI	Neuroblast
ENSG00000171552	BCL2L1	0.618664	6.71762	0.230092	0.7	2.MCI/0.HA	Neuroblast
ENSG00000132386	SERPINF1	-1.55129	2.56793	0.230804	0.7018	3.AD/1.YC	Immature
ENSG00000095303	PTGS1	-6.75294	1.56205	0.231982	0.7027	3.AD/1.YC	Immature
ENSG00000107562	CXCL12	-6.79022	1.60799	0.231813	0.7027	3.AD/1.YC	Immature
ENSG00000150594	ADRA2A	-6.6766	1.49468	0.232246	0.7027	3.AD/1.YC	Immature
ENSG00000149295	DRD2	-6.70467	1.52812	0.232113	0.7027	3.AD/1.YC	Immature
ENSG00000182968	SOX1	-6.71296	1.55341	0.232018	0.7027	3.AD/1.YC	Immature
ENSG00000100968	NFATC4	-6.65436	1.49622	0.232239	0.7027	3.AD/1.YC	Immature
ENSG00000111728	ST8SIA1	-0.512472	7.67494	0.231843	0.7027	3.AD/0.HA	Neural Stem
ENSG00000182621	PLCB1	0.810628	9.36996	0.232239	0.7027	1.YC/0.HA	Neuroblast
ENSG00000162946	DISC1	-0.723454	7.51518	0.231605	0.7027	3.AD/1.YC	Neuroblast
ENSG00000137764	MAP2K5	0.656906	7.70279	0.232387	0.7028	3.AD/2.MCI	Neuroblast
ENSG00000122966	CIT	0.577034	7.33754	0.232663	0.7032	3.AD/2.MCI	Immature
ENSG00000130816	DNMT1			0.232787	0.7032	Diagnosis	Neuroblast
ENSG00000151322	NPAS3			0.23306	0.7037	Diagnosis	Immature
ENSG00000132688	NES	-6.36991	1.23236	0.233479	0.7046	3.AD/1.YC	Immature
ENSG00000118971	CCND2	-0.783343	5.34848	0.233714	0.7049	2.MCI/1.YC	Immature
ENSG00000132688	NES	-0.710378	1.26526	0.234194	0.706	2.MCI/0.HA	Immature
ENSG00000162998	FRZB	1.22322	2.311	0.234498	0.7063	3.AD/1.YC	Neural Stem
ENSG00000173511	VEGFB	-1.28331	5.51972	0.234564	0.7063	1.YC/0.HA	Neuroblast
ENSG00000172137	CALB2			0.234904	0.707	Diagnosis	Neuroblast
ENSG00000169083	AR			0.235429	0.7074	Diagnosis	Immature
ENSG00000077782	FGFR1	0.554187	5.45442	0.235188	0.7074	2.MCI/0.HA	Immature
ENSG00000017427	IGF1	-0.593617	4.64319	0.235302	0.7074	2.MCI/1.YC	Immature
ENSG00000167720	SRR	0.715495	3.76279	0.235603	0.7076	2.MCI/1.YC	Neural Stem
ENSG00000182580	EPHB3			0.236049	0.7083	Diagnosis	Immature
ENSG00000125266	EFNB2			0.236252	0.7083	Diagnosis	Immature
ENSG00000160789	LMNA	-0.652522	3.88391	0.236804	0.7083	2.MCI/1.YC	Immature
ENSG00000113758	DBN1	1.10642	4.80962	0.236588	0.7083	2.MCI/1.YC	Immature
ENSG00000102524	TNFSF13B	0.86421	5.60291	0.236807	0.7083	2.MCI/1.YC	Immature
ENSG00000151090	THRB	0.518003	7.90725	0.236535	0.7083	2.MCI/0.HA	Neural Stem
ENSG00000181449	SOX2	1.07608	7.12569	0.236995	0.7083	2.MCI/1.YC	Neuroblast
ENSG00000104327	CALB1	1.6351	6.1798	0.236904	0.7083	2.MCI/1.YC	Neuroblast
ENSG00000183454	GRIN2A	0.743814	8.65664	0.236883	0.7083	3.AD/2.MCI	Neuroblast
ENSG00000159110	IFNAR2	-0.798456	4.99548	0.237776	0.7084	3.AD/0.HA	Immature
ENSG00000091140	DLD	-0.508773	5.30555	0.237335	0.7084	2.MCI/1.YC	Immature
ENSG00000118432	CNR1	-0.866446	5.33314	0.237269	0.7084	3.AD/2.MCI	Immature
ENSG00000205927	OLIG2	-4.23698	1.89541	0.237754	0.7084	3.AD/2.MCI	Immature
ENSG00000102003	SYP	-0.513173	4.23337	0.237567	0.7084	3.AD/1.YC	Neural Stem
ENSG00000151623	NR3C2	0.673851	8.06959	0.237907	0.7084	3.AD/0.HA	Neuroblast
ENSG00000077782	FGFR1	0.781504	6.3438	0.237867	0.7084	3.AD/0.HA	Neuroblast
ENSG00000165795	NDRG2	-0.559137	7.46728	0.23847	0.7097	2.MCI/1.YC	Neural Stem
ENSG00000030582	GRN			0.238617	0.7098	Diagnosis	Neural Stem
ENSG00000126368	NR1D1	-1.47277	2.79597	0.23902	0.7099	3.AD/0.HA	Immature
ENSG00000100697	DICER1	0.327304	8.08541	0.23884	0.7099	3.AD/0.HA	Neural Stem
ENSG00000134982	APC	-0.600235	9.62413	0.239008	0.7099	2.MCI/1.YC	Neural Stem
ENSG00000148400	NOTCH1	-5.16881	1.82175	0.240305	0.7129	3.AD/0.HA	Immature
ENSG00000067182	TNFRSF1A	-0.643518	4.80466	0.24015	0.7129	3.AD/0.HA	Neural Stem
ENSG00000138685	FGF2	1.4083	3.23124	0.240725	0.7131	2.MCI/0.HA	Immature
ENSG00000164342	TLR3	-1.72593	1.27781	0.240651	0.7131	3.AD/0.HA	Neural Stem
ENSG00000134982	APC	-0.697353	8.26932	0.240612	0.7131	3.AD/1.YC	Neuroblast
ENSG00000026103	FAS	-0.576077	4.2676	0.240955	0.7134	3.AD/1.YC	Neural Stem
ENSG00000162490	DRAXIN			0.241345	0.7141	Diagnosis	Immature
ENSG00000139352	ASCL1	1.20816	1.43825	0.24228	0.7162	1.YC/0.HA	Immature
ENSG00000091831	ESR1	0.962862	4.05125	0.242424	0.7162	3.AD/2.MCI	Immature
ENSG00000079215	SLC1A3	0.58677	8.40256	0.242311	0.7162	1.YC/0.HA	Neuroblast
ENSG00000151322	NPAS3	0.56675	9.10265	0.24301	0.7176	2.MCI/0.HA	Immature
ENSG00000121853	GHSR	2.72414	1.2739	0.243301	0.718	3.AD/1.YC	Immature
ENSG00000173511	VEGFB	-1.38904	4.94389	0.243472	0.7182	2.MCI/1.YC	Neuroblast
ENSG00000105894	PTN	-0.706327	8.11715	0.243661	0.7183	3.AD/0.HA	Neuroblast
ENSG00000272398	CD24	-0.747902	6.36343	0.244835	0.7201	3.AD/2.MCI	Immature
ENSG00000116678	LEPR	0.547708	6.28905	0.244891	0.7201	2.MCI/0.HA	Neural Stem
ENSG00000169057	MECP2	0.403952	6.23751	0.244616	0.7201	2.MCI/0.HA	Neural Stem
ENSG00000129245	FXR2	0.59677	3.48621	0.244516	0.7201	3.AD/0.HA	Neural Stem
ENSG00000168214	RBPJ	0.69205	8.40288	0.244726	0.7201	1.YC/0.HA	Neuroblast
ENSG00000196712	NF1	0.383267	8.38584	0.245862	0.7203	1.YC/0.HA	Immature
ENSG00000124766	SOX4	-4.67301	2.1482	0.245502	0.7203	3.AD/2.MCI	Immature
ENSG00000091140	DLD	0.579222	5.37201	0.245359	0.7203	3.AD/2.MCI	Immature
ENSG00000164342	TLR3			0.245614	0.7203	Diagnosis	Neural Stem
ENSG00000112576	CCND3			0.245765	0.7203	Diagnosis	Neural Stem
ENSG00000007372	PAX6	-0.640062	5.62648	0.245857	0.7203	3.AD/2.MCI	Neural Stem
ENSG00000124140	SLC12A5			0.245537	0.7203	Diagnosis	Neuroblast
ENSG00000122641	INHBA	-0.861618	3.22148	0.246074	0.7206	1.YC/0.HA	Immature
ENSG00000118785	SPP1	-2.02306	5.68041	0.247402	0.7238	3.AD/0.HA	Immature
ENSG00000127152	BCL11B	1.01005	6.89974	0.247429	0.7238	2.MCI/0.HA	Neuroblast
ENSG00000163513	TGFBR2	-0.819933	5.45108	0.247599	0.7239	3.AD/2.MCI	Neural Stem
ENSG00000165795	NDRG2	1.19638	4.49512	0.248331	0.7243	2.MCI/0.HA	Immature
ENSG00000176697	BDNF	-0.63777	6.66316	0.248318	0.7243	3.AD/0.HA	Immature
ENSG00000155511	GRIA1	0.696207	10.2234	0.248394	0.7243	2.MCI/1.YC	Immature
ENSG00000138336	TET1	-0.774936	4.60729	0.248272	0.7243	2.MCI/1.YC	Immature
ENSG00000122966	CIT	-0.602696	3.82426	0.248338	0.7243	2.MCI/1.YC	Neural Stem
ENSG00000067560	RHOA	-0.484004	5.34392	0.248839	0.7253	2.MCI/1.YC	Immature
ENSG00000198947	DMD	0.409633	8.82651	0.249206	0.7259	3.AD/0.HA	Neural Stem
ENSG00000155368	DBI			0.252291	0.7262	Diagnosis	Immature
ENSG00000113578	FGF1			0.251339	0.7262	Diagnosis	Immature
ENSG00000067182	TNFRSF1A	1.03543	2.56893	0.252279	0.7262	1.YC/0.HA	Immature
ENSG00000112333	NR2E1	2.1574	0.833035	0.250107	0.7262	2.MCI/0.HA	Immature
ENSG00000187323	DCC	-0.650988	9.95898	0.252388	0.7262	2.MCI/0.HA	Immature
ENSG00000164687	FABP5	1.12306	4.91813	0.250525	0.7262	2.MCI/1.YC	Immature
ENSG00000111728	ST8SIA1	-0.574401	6.68832	0.250883	0.7262	2.MCI/1.YC	Immature
ENSG00000070808	CAMK2A	0.578795	8.36701	0.24987	0.7262	3.AD/1.YC	Immature
ENSG00000106571	GLI3	-0.943953	4.01212	0.251473	0.7262	3.AD/2.MCI	Immature
ENSG00000139287	TPH2	-5.03569	2.31908	0.251771	0.7262	3.AD/2.MCI	Immature
ENSG00000176887	SOX11			0.251629	0.7262	Diagnosis	Neural Stem
ENSG00000081479	LRP2			0.249505	0.7262	Diagnosis	Neural Stem
ENSG00000089250	NOS1	-1.02319	3.04837	0.252719	0.7262	1.YC/0.HA	Neural Stem
ENSG00000106571	GLI3	0.511482	8.26831	0.250471	0.7262	2.MCI/0.HA	Neural Stem
ENSG00000129245	FXR2	0.56	3.46915	0.251626	0.7262	2.MCI/0.HA	Neural Stem
ENSG00000133794	ARNTL	-0.510232	5.33173	0.250296	0.7262	3.AD/0.HA	Neural Stem
ENSG00000166484	MAPK7	-0.703778	1.47175	0.250751	0.7262	3.AD/0.HA	Neural Stem
ENSG00000096696	DSP	2.45951	1.35112	0.249907	0.7262	2.MCI/1.YC	Neural Stem
ENSG00000118260	CREB1	0.341958	6.41553	0.252456	0.7262	3.AD/1.YC	Neural Stem
ENSG00000138685	FGF2	-0.442459	7.17174	0.252642	0.7262	3.AD/2.MCI	Neural Stem
ENSG00000124766	SOX4	-1.59005	1.61162	0.252777	0.7262	3.AD/2.MCI	Neural Stem
ENSG00000017427	IGF1	2.00797	2.09493	0.250772	0.7262	3.AD/2.MCI	Neural Stem
ENSG00000141644	MBD1			0.251391	0.7262	Diagnosis	Neuroblast
ENSG00000104327	CALB1	1.0926	6.1858	0.251753	0.7262	2.MCI/0.HA	Neuroblast
ENSG00000169057	MECP2	0.54116	6.65115	0.252639	0.7262	3.AD/0.HA	Neuroblast
ENSG00000132386	SERPINF1	-0.993465	4.86339	0.251957	0.7262	2.MCI/1.YC	Neuroblast
ENSG00000142192	APP	-0.625292	9.85677	0.252137	0.7262	3.AD/1.YC	Neuroblast
ENSG00000106546	AHR			0.252991	0.7264	Diagnosis	Neural Stem
ENSG00000159388	BTG2	1.51061	5.85988	0.253698	0.7281	3.AD/1.YC	Neuroblast
ENSG00000108947	EFNB3			0.254008	0.7282	Diagnosis	Immature
ENSG00000105835	NAMPT	0.665385	5.32821	0.254042	0.7282	3.AD/0.HA	Immature
ENSG00000186868	MAPT	0.32992	8.4548	0.254105	0.7282	3.AD/2.MCI	Neural Stem
ENSG00000113758	DBN1	-0.490935	4.19441	0.254413	0.7287	1.YC/0.HA	Immature
ENSG00000102755	FLT1	-6.7653	3.10965	0.255745	0.731	3.AD/0.HA	Immature
ENSG00000187323	DCC	0.581626	9.97625	0.255628	0.731	3.AD/2.MCI	Immature
ENSG00000136869	TLR4	0.505104	6.5708	0.255604	0.731	1.YC/0.HA	Neural Stem
ENSG00000131437	KIF3A	-0.890107	8.33682	0.255762	0.731	2.MCI/1.YC	Neuroblast
ENSG00000113494	PRLR	-5.37265	2.52254	0.256452	0.7312	3.AD/2.MCI	Immature
ENSG00000111728	ST8SIA1			0.256097	0.7312	Diagnosis	Neural Stem
ENSG00000100097	LGALS1			0.256385	0.7312	Diagnosis	Neural Stem
ENSG00000164687	FABP5	-0.924707	5.7542	0.256141	0.7312	1.YC/0.HA	Neural Stem
ENSG00000168959	GRM5	-0.773376	8.41098	0.256268	0.7312	2.MCI/1.YC	Neuroblast
ENSG00000168610	STAT3	0.905635	6.77407	0.256706	0.7315	3.AD/1.YC	Neuroblast
ENSG00000151322	NPAS3	0.465711	12.0955	0.257044	0.7321	1.YC/0.HA	Neural Stem
ENSG00000197386	HTT	-0.337483	6.62871	0.257612	0.733	3.AD/1.YC	Neural Stem
ENSG00000171094	ALK	-1.13077	4.93249	0.257557	0.733	1.YC/0.HA	Neuroblast
ENSG00000079215	SLC1A3	1.19365	7.04742	0.258676	0.7339	2.MCI/0.HA	Immature
ENSG00000166949	SMAD3	-0.440188	6.67671	0.258366	0.7339	2.MCI/0.HA	Immature
ENSG00000151012	SLC7A11	1.02576	6.15598	0.258704	0.7339	3.AD/0.HA	Immature
ENSG00000171867	PRNP	0.707002	7.63482	0.259357	0.7339	2.MCI/1.YC	Immature
ENSG00000170345	FOS	-5.58605	2.69421	0.259156	0.7339	3.AD/2.MCI	Immature
ENSG00000102879	CORO1A	-1.51407	4.24672	0.258078	0.7339	3.AD/2.MCI	Immature
ENSG00000130816	DNMT1	-1.13218	4.50683	0.259138	0.7339	3.AD/2.MCI	Immature
ENSG00000116106	EPHA4			0.258538	0.7339	Diagnosis	Neural Stem
ENSG00000102468	HTR2A			0.259295	0.7339	Diagnosis	Neural Stem
ENSG00000175387	SMAD2	0.289724	7.35409	0.259069	0.7339	3.AD/0.HA	Neural Stem
ENSG00000133639	BTG1	0.493645	3.88972	0.258211	0.7339	3.AD/1.YC	Neural Stem
ENSG00000160307	S100B			0.260587	0.7363	Diagnosis	Immature
ENSG00000147246	HTR2C	1.18374	2.43444	0.26061	0.7363	2.MCI/0.HA	Neural Stem
ENSG00000132386	SERPINF1	-1.59082	4.81002	0.260505	0.7363	3.AD/1.YC	Neuroblast
ENSG00000081479	LRP2	1.31982	4.46115	0.261093	0.7364	1.YC/0.HA	Immature
ENSG00000185666	SYN3	0.515121	4.59737	0.261409	0.7364	1.YC/0.HA	Neural Stem
ENSG00000122756	CNTFR	0.915284	4.6857	0.260848	0.7364	2.MCI/0.HA	Neural Stem
ENSG00000132906	CASP9	0.644296	4.43352	0.261414	0.7364	2.MCI/1.YC	Neural Stem
ENSG00000155368	DBI	-0.516021	5.95251	0.261242	0.7364	3.AD/1.YC	Neural Stem
ENSG00000142949	PTPRF	-0.773845	6.44772	0.261075	0.7364	3.AD/1.YC	Neuroblast
ENSG00000183454	GRIN2A	-0.747376	8.55306	0.26261	0.7394	2.MCI/1.YC	Neuroblast
[truncated: 3,629 more rows]
