# Supplementary material for: A roadmap to human hippocampal neurogenesis in adulthood, aging and AD.
Source: Research Square preprint supplement (doi:10.21203/rs.3.rs-4469965/v1), 2024-05-30
Supplement: Supplementary file 10 [file bd5cda603384930bda96bfb4.xlsx]

## Sheet: signif_summary
Contrast	Cluster	Total	Up	Down
Diagnosis	Immature	203	0	0
1.YC/0.HA	Immature	1105	674	431
2.MCI/0.HA	Immature	3	0	3
3.AD/0.HA	Immature	473	34	439
2.MCI/1.YC	Immature	481	20	461
3.AD/1.YC	Immature	2511	314	2197
3.AD/2.MCI	Immature	254	33	221
Diagnosis	Neural Stem	489	0	0
1.YC/0.HA	Neural Stem	453	207	246
2.MCI/0.HA	Neural Stem	34	3	31
3.AD/0.HA	Neural Stem	961	297	664
2.MCI/1.YC	Neural Stem	56	15	41
3.AD/1.YC	Neural Stem	2347	1058	1289
3.AD/2.MCI	Neural Stem	11	9	2
Diagnosis	Neuroblast	129	0	0
1.YC/0.HA	Neuroblast	13	4	9
2.MCI/0.HA	Neuroblast	23	6	17
3.AD/0.HA	Neuroblast	67	12	55
2.MCI/1.YC	Neuroblast	5	1	4
3.AD/1.YC	Neuroblast	55	6	49
3.AD/2.MCI	Neuroblast	3	2	1
CODE	Acronym in manuscript
HA	NCI
YC	YA
MCI	MCI
AD	AD

## Sheet: signif
ID	Symbol	log2FC	log2CPM	PValue	QValue	Contrast	Cluster
ENSG00000189337	KAZN			0.00145171	0.228635	Diagnosis	Immature
ENSG00000117614	SYF2			0.00200029	0.242344	Diagnosis	Immature
ENSG00000117013	KCNQ4			0.000148021	0.131757	Diagnosis	Immature
ENSG00000283445	AL136985.3			0.00199778	0.242344	Diagnosis	Immature
ENSG00000287647	AC093575.1			0.00160764	0.230403	Diagnosis	Immature
ENSG00000097096	SYDE2			0.00132653	0.228635	Diagnosis	Immature
ENSG00000116830	TTF2			0.00237077	0.247831	Diagnosis	Immature
ENSG00000143248	RGS5			0.00156255	0.23006	Diagnosis	Immature
ENSG00000285638	AL138927.1			9.88304e-05	0.131757	Diagnosis	Immature
ENSG00000133067	LGR6			0.00164245	0.231272	Diagnosis	Immature
ENSG00000066027	PPP2R5A			0.00215793	0.245978	Diagnosis	Immature
ENSG00000119283	TRIM67			0.00205462	0.242344	Diagnosis	Immature
ENSG00000286263	AL391832.4			0.000246933	0.134273	Diagnosis	Immature
ENSG00000224184	MIR3681HG			0.0026127	0.247831	Diagnosis	Immature
ENSG00000157851	DPYSL5			0.00131809	0.228635	Diagnosis	Immature
ENSG00000228033	AC010967.1			0.0020842	0.242344	Diagnosis	Immature
ENSG00000143947	RPS27A			0.00100249	0.228635	Diagnosis	Immature
ENSG00000256637	LINC01965			0.000585838	0.19341	Diagnosis	Immature
ENSG00000235597	LINC01102			6.77919e-05	0.131757	Diagnosis	Immature
ENSG00000144230	GPR17			0.000181115	0.131757	Diagnosis	Immature
ENSG00000286778	AC013265.1			0.000121725	0.131757	Diagnosis	Immature
ENSG00000226939	AC062021.1			0.00203888	0.242344	Diagnosis	Immature
ENSG00000153246	PLA2R1			0.00256805	0.247831	Diagnosis	Immature
ENSG00000153250	RBMS1			0.00116905	0.228635	Diagnosis	Immature
ENSG00000144355	DLX1			0.00131537	0.228635	Diagnosis	Immature
ENSG00000225421	AC019330.1			0.000699062	0.208456	Diagnosis	Immature
ENSG00000196141	SPATS2L			0.00115003	0.228635	Diagnosis	Immature
ENSG00000178568	ERBB4			0.00231258	0.247831	Diagnosis	Immature
ENSG00000182698	RESP18			0.000183613	0.131757	Diagnosis	Immature
ENSG00000072182	ASIC4			0.00232997	0.247831	Diagnosis	Immature
ENSG00000123977	DAW1			0.00207444	0.242344	Diagnosis	Immature
ENSG00000188011	RTP5			0.000136493	0.131757	Diagnosis	Immature
ENSG00000157103	SLC6A1			0.00266452	0.247831	Diagnosis	Immature
ENSG00000144713	RPL32			0.000518157	0.188224	Diagnosis	Immature
ENSG00000154783	FGD5			0.00139055	0.228635	Diagnosis	Immature
ENSG00000224822	THRB-IT1			0.000761912	0.214091	Diagnosis	Immature
ENSG00000168032	ENTPD3			0.00177001	0.236396	Diagnosis	Immature
ENSG00000172888	ZNF621			0.00115411	0.228635	Diagnosis	Immature
ENSG00000243295	AC126121.3			0.00214967	0.245978	Diagnosis	Immature
ENSG00000163377	TAFA4			0.00270072	0.247831	Diagnosis	Immature
ENSG00000044524	EPHA3			0.000387879	0.159358	Diagnosis	Immature
ENSG00000057019	DCBLD2			0.00260686	0.247831	Diagnosis	Immature
ENSG00000163430	FSTL1			0.00219475	0.245978	Diagnosis	Immature
ENSG00000287645	AC092939.1			0.00132511	0.228635	Diagnosis	Immature
ENSG00000249252	AC098829.1			0.000223541	0.131757	Diagnosis	Immature
ENSG00000250723	AC016687.2			0.000604035	0.195919	Diagnosis	Immature
ENSG00000074966	TXK			0.000541287	0.188878	Diagnosis	Immature
ENSG00000135605	TEC			0.00262296	0.247831	Diagnosis	Immature
ENSG00000134851	TMEM165			0.000331259	0.152524	Diagnosis	Immature
ENSG00000109255	NMU			0.000837046	0.22344	Diagnosis	Immature
ENSG00000138792	ENPEP			0.00262501	0.247831	Diagnosis	Immature
ENSG00000173376	NDNF			0.000402159	0.161633	Diagnosis	Immature
ENSG00000186867	QRFPR			0.00036046	0.157234	Diagnosis	Immature
ENSG00000138741	TRPC3			0.000140204	0.131757	Diagnosis	Immature
ENSG00000145425	RPS3A			8.72441e-05	0.131757	Diagnosis	Immature
ENSG00000164142	FAM160A1			0.00267871	0.247831	Diagnosis	Immature
ENSG00000248431	AC021134.1			0.00106253	0.228635	Diagnosis	Immature
ENSG00000249378	LINC01060			0.0017442	0.235378	Diagnosis	Immature
ENSG00000183654	MARCH11			0.00199975	0.242344	Diagnosis	Immature
ENSG00000287176	AC099517.1			0.00119682	0.228635	Diagnosis	Immature
ENSG00000134352	IL6ST			0.00113771	0.228635	Diagnosis	Immature
ENSG00000122012	SV2C			0.00123092	0.228635	Diagnosis	Immature
ENSG00000145681	HAPLN1			0.000519224	0.188224	Diagnosis	Immature
ENSG00000237187	NR2F1-AS1			0.000943487	0.228635	Diagnosis	Immature
ENSG00000251027	LINC01950			0.00194847	0.242344	Diagnosis	Immature
ENSG00000112893	MAN2A1			0.00165922	0.231272	Diagnosis	Immature
ENSG00000253807	LINC01170			0.00270328	0.247831	Diagnosis	Immature
ENSG00000138829	FBN2			0.00171826	0.233582	Diagnosis	Immature
ENSG00000044115	CTNNA1			0.00108025	0.228635	Diagnosis	Immature
ENSG00000187678	SPRY4			0.000148613	0.131757	Diagnosis	Immature
ENSG00000236714	LINC01844			0.00139272	0.228635	Diagnosis	Immature
ENSG00000249881	AC008696.2			6.36371e-05	0.131757	Diagnosis	Immature
ENSG00000249738	AC008691.1			0.000314286	0.152524	Diagnosis	Immature
ENSG00000253925	AC011369.1			0.00120775	0.228635	Diagnosis	Immature
ENSG00000250992	AC139491.3			0.00145049	0.228635	Diagnosis	Immature
ENSG00000286364	AL512308.1			0.000782778	0.216	Diagnosis	Immature
ENSG00000272168	CASC15			0.000379404	0.159358	Diagnosis	Immature
ENSG00000286954	AL033539.2			0.00139593	0.228635	Diagnosis	Immature
ENSG00000233358	AL035401.1			0.0022974	0.247831	Diagnosis	Immature
ENSG00000079691	CARMIL1			0.00203669	0.242344	Diagnosis	Immature
ENSG00000231500	RPS18			0.000308539	0.152524	Diagnosis	Immature
ENSG00000146147	MLIP			0.00259167	0.247831	Diagnosis	Immature
ENSG00000233237	LINC00472			0.000155412	0.131757	Diagnosis	Immature
ENSG00000146242	TPBG			0.000506369	0.188224	Diagnosis	Immature
ENSG00000287578	AL034348.1			0.000295478	0.151745	Diagnosis	Immature
ENSG00000271860	AL589740.1			0.000200752	0.131757	Diagnosis	Immature
ENSG00000249853	HS3ST5			0.001816	0.237573	Diagnosis	Immature
ENSG00000196569	LAMA2			0.000156107	0.131757	Diagnosis	Immature
ENSG00000171408	PDE7B			7.55695e-06	0.0698565	Diagnosis	Immature
ENSG00000233452	STXBP5-AS1			0.00018073	0.131757	Diagnosis	Immature
ENSG00000146469	VIP			1.22557e-06	0.0226583	Diagnosis	Immature
ENSG00000146477	SLC22A3			0.00219645	0.245978	Diagnosis	Immature
ENSG00000112531	QKI			0.00222189	0.245978	Diagnosis	Immature
ENSG00000112541	PDE10A			0.00158953	0.23006	Diagnosis	Immature
ENSG00000225968	ELFN1			0.000206733	0.131757	Diagnosis	Immature
ENSG00000215045	GRID2IP			0.000723419	0.212295	Diagnosis	Immature
ENSG00000243004	AC005062.1			0.00154801	0.23006	Diagnosis	Immature
ENSG00000196683	TOMM7			0.000569434	0.191412	Diagnosis	Immature
ENSG00000173852	DPY19L1			0.00263184	0.247831	Diagnosis	Immature
ENSG00000122545	SEPTIN7			0.00125316	0.228635	Diagnosis	Immature
ENSG00000126524	SBDS			0.00243746	0.247831	Diagnosis	Immature
ENSG00000231764	DLX6-AS1			0.000322201	0.152524	Diagnosis	Immature
ENSG00000189056	RELN			0.0026736	0.247831	Diagnosis	Immature
ENSG00000181072	CHRM2			0.00120105	0.228635	Diagnosis	Immature
ENSG00000242258	LINC00996			0.000551678	0.188878	Diagnosis	Immature
ENSG00000185053	SGCZ			0.00122746	0.228635	Diagnosis	Immature
ENSG00000133863	TEX15			0.00254482	0.247831	Diagnosis	Immature
ENSG00000029534	ANK1			0.000270928	0.143112	Diagnosis	Immature
ENSG00000147571	CRH			0.00249776	0.247831	Diagnosis	Immature
ENSG00000254337	AC083967.1			0.00248167	0.247831	Diagnosis	Immature
ENSG00000253197	AC117834.1			0.00119526	0.228635	Diagnosis	Immature
ENSG00000286946	AC024996.1			0.00274349	0.24986	Diagnosis	Immature
ENSG00000170873	MTSS1			0.00257166	0.247831	Diagnosis	Immature
ENSG00000104415	CCN4			0.00109627	0.228635	Diagnosis	Immature
ENSG00000131773	KHDRBS3			0.00203104	0.242344	Diagnosis	Immature
ENSG00000235448	LURAP1L-AS1			0.000111669	0.131757	Diagnosis	Immature
ENSG00000165272	AQP3			0.000668058	0.207242	Diagnosis	Immature
ENSG00000198722	UNC13B			0.00220914	0.245978	Diagnosis	Immature
ENSG00000119121	TRPM6			0.000175571	0.131757	Diagnosis	Immature
ENSG00000197958	RPL12			0.00184067	0.237975	Diagnosis	Immature
ENSG00000187239	FNBP1			0.00113132	0.228635	Diagnosis	Immature
ENSG00000160293	VAV2			0.00154336	0.23006	Diagnosis	Immature
ENSG00000229205	LINC00200			0.00142235	0.228635	Diagnosis	Immature
ENSG00000107562	CXCL12			0.00119317	0.228635	Diagnosis	Immature
ENSG00000285300	AC073176.2			0.000190597	0.131757	Diagnosis	Immature
ENSG00000203867	RBM20			0.00117627	0.228635	Diagnosis	Immature
ENSG00000285582	AC016042.1			0.00165906	0.231272	Diagnosis	Immature
ENSG00000251381	LINC00958			0.00251662	0.247831	Diagnosis	Immature
ENSG00000285751	AC021723.2			2.90174e-05	0.0894122	Diagnosis	Immature
ENSG00000167996	FTH1			0.00142502	0.228635	Diagnosis	Immature
ENSG00000168439	STIP1			0.00118774	0.228635	Diagnosis	Immature
ENSG00000131620	ANO1			0.000764279	0.214091	Diagnosis	Immature
ENSG00000149273	RPS3			0.000881236	0.22344	Diagnosis	Immature
ENSG00000255429	AP003400.1			0.00117473	0.228635	Diagnosis	Immature
ENSG00000255580	AP000462.1			0.00265051	0.247831	Diagnosis	Immature
ENSG00000019144	PHLDB1			0.00244047	0.247831	Diagnosis	Immature
ENSG00000182934	SRPRA			0.00265702	0.247831	Diagnosis	Immature
ENSG00000273409	LINC02712			0.00258403	0.247831	Diagnosis	Immature
ENSG00000111640	GAPDH			0.00141361	0.228635	Diagnosis	Immature
ENSG00000173157	ADAMTS20			0.00155782	0.23006	Diagnosis	Immature
ENSG00000196531	NACA			0.00201898	0.242344	Diagnosis	Immature
ENSG00000166863	TAC3			1.66085e-05	0.0718286	Diagnosis	Immature
ENSG00000258231	AC020637.1			0.000338245	0.152524	Diagnosis	Immature
ENSG00000257259	LINC02388			0.000195513	0.131757	Diagnosis	Immature
ENSG00000135678	CPM			0.000902064	0.22537	Diagnosis	Immature
ENSG00000257434	AC073525.1			0.0018146	0.237573	Diagnosis	Immature
ENSG00000165899	OTOGL			8.69189e-05	0.131757	Diagnosis	Immature
ENSG00000074527	NTN4			0.000166944	0.131757	Diagnosis	Immature
ENSG00000256870	SLC5A8			0.00188841	0.240779	Diagnosis	Immature
ENSG00000017427	IGF1			0.00121362	0.228635	Diagnosis	Immature
ENSG00000187848	P2RX2			0.00198412	0.242344	Diagnosis	Immature
ENSG00000132972	RNF17			1.94257e-05	0.0718286	Diagnosis	Immature
ENSG00000122025	FLT3			0.00262006	0.247831	Diagnosis	Immature
ENSG00000102468	HTR2A			0.00243472	0.247831	Diagnosis	Immature
ENSG00000285572	AL136441.1			0.000365701	0.157234	Diagnosis	Immature
ENSG00000236051	MYCBP2-AS1			0.000217633	0.131757	Diagnosis	Immature
ENSG00000139737	SLAIN1			0.000424829	0.167111	Diagnosis	Immature
ENSG00000286312	AL157769.1			0.0015928	0.23006	Diagnosis	Immature
ENSG00000139865	TTC6			0.00100395	0.228635	Diagnosis	Immature
ENSG00000139926	FRMD6			0.00126178	0.228635	Diagnosis	Immature
ENSG00000180998	GPR137C			0.000862383	0.22344	Diagnosis	Immature
ENSG00000198732	SMOC1			0.00182472	0.237573	Diagnosis	Immature
ENSG00000198838	RYR3			0.00145525	0.228635	Diagnosis	Immature
ENSG00000261684	AC018362.1			0.00170393	0.233582	Diagnosis	Immature
ENSG00000287950	AC009432.2			0.000237447	0.133028	Diagnosis	Immature
ENSG00000140470	ADAMTS17			0.00260584	0.247831	Diagnosis	Immature
ENSG00000103274	NUBP1			0.00263747	0.247831	Diagnosis	Immature
ENSG00000166828	SCNN1G			0.00131351	0.228635	Diagnosis	Immature
ENSG00000171208	NETO2			0.00132319	0.228635	Diagnosis	Immature
ENSG00000140807	NKD1			0.000921494	0.227154	Diagnosis	Immature
ENSG00000087250	MT3			0.0015071	0.23006	Diagnosis	Immature
ENSG00000034713	GABARAPL2			0.000872913	0.22344	Diagnosis	Immature
ENSG00000141485	SLC13A5			0.00132356	0.228635	Diagnosis	Immature
ENSG00000161970	RPL26			0.000672571	0.207242	Diagnosis	Immature
ENSG00000214970	AC005323.1			0.000760625	0.214091	Diagnosis	Immature
ENSG00000125691	RPL23			0.0025318	0.247831	Diagnosis	Immature
ENSG00000238083	LRRC37A2			0.00152752	0.23006	Diagnosis	Immature
ENSG00000075429	CACNG5			0.00239769	0.247831	Diagnosis	Immature
ENSG00000161509	GRIN2C			0.00218799	0.245978	Diagnosis	Immature
ENSG00000184009	ACTG1			0.00207545	0.242344	Diagnosis	Immature
ENSG00000285550	AC110014.1			0.000637692	0.20327	Diagnosis	Immature
ENSG00000101638	ST8SIA5			0.0027078	0.247831	Diagnosis	Immature
ENSG00000177576	C18orf32			0.000870548	0.22344	Diagnosis	Immature
ENSG00000141639	MAPK4			0.000489246	0.188224	Diagnosis	Immature
ENSG00000081913	PHLPP1			0.00211913	0.244866	Diagnosis	Immature
ENSG00000264015	AC124254.2			1.82173e-05	0.0718286	Diagnosis	Immature
ENSG00000089847	ANKRD24			0.00250877	0.247831	Diagnosis	Immature
ENSG00000142449	FBN3			0.00120737	0.228635	Diagnosis	Immature
ENSG00000080573	COL5A3			0.000882256	0.22344	Diagnosis	Immature
ENSG00000197360	ZNF98			0.00157644	0.23006	Diagnosis	Immature
ENSG00000063180	CA11			0.00166373	0.231272	Diagnosis	Immature
ENSG00000101333	PLCB4			0.000687424	0.208346	Diagnosis	Immature
ENSG00000088970	KIZ			0.00170938	0.233582	Diagnosis	Immature
ENSG00000279082	LINC01727			0.000194916	0.131757	Diagnosis	Immature
ENSG00000053438	NNAT			0.00202057	0.242344	Diagnosis	Immature
ENSG00000171189	GRIK1			0.000547176	0.188878	Diagnosis	Immature
ENSG00000142156	COL6A1			0.000228051	0.131757	Diagnosis	Immature
ENSG00000047648	ARHGAP6			0.00145927	0.228635	Diagnosis	Immature
ENSG00000198034	RPS4X			0.00158574	0.23006	Diagnosis	Immature
ENSG00000286523	AL022151.1			0.00227285	0.247831	Diagnosis	Immature
ENSG00000236256	DIAPH2-AS1			0.00177732	0.236396	Diagnosis	Immature
ENSG00000165694	FRMD7			0.00188766	0.240779	Diagnosis	Immature
ENSG00000160131	VMA21			0.00136526	0.228635	Diagnosis	Immature
ENSG00000215912	TTC34	1.90895	1.12427	0.00724197	0.183348	1.YC/0.HA	Immature
ENSG00000236948	AL365255.1	1.4758	2.50035	0.0107865	0.221277	1.YC/0.HA	Immature
ENSG00000116254	CHD5	-1.13944	6.64739	0.00132996	0.0828092	1.YC/0.HA	Immature
ENSG00000116251	RPL22	-0.861442	6.24986	0.0140049	0.242779	1.YC/0.HA	Immature
ENSG00000215788	TNFRSF25	-1.15541	5.03846	0.00647747	0.17637	1.YC/0.HA	Immature
ENSG00000142583	SLC2A5	2.23515	2.67481	0.00465692	0.1487	1.YC/0.HA	Immature
ENSG00000162444	RBP7	2.34187	1.31909	0.0109129	0.221878	1.YC/0.HA	Immature
ENSG00000241563	CORT	1.75412	1.72174	0.00135206	0.0833232	1.YC/0.HA	Immature
ENSG00000162493	PDPN	3.01162	1.18817	0.00356979	0.135511	1.YC/0.HA	Immature
ENSG00000171729	TMEM51	2.75475	1.74832	0.00201786	0.101376	1.YC/0.HA	Immature
ENSG00000162542	TMCO4	1.51001	1.30789	0.0138624	0.241326	1.YC/0.HA	Immature
ENSG00000127472	PLA2G5	2.89431	0.766448	0.00529554	0.158689	1.YC/0.HA	Immature
ENSG00000084636	COL16A1	1.87047	2.94521	0.0113578	0.224654	1.YC/0.HA	Immature
ENSG00000142920	AZIN2	1.1739	4.47047	0.0144047	0.245783	1.YC/0.HA	Immature
ENSG00000020129	NCDN	-1.75324	6.85306	0.000213467	0.0290189	1.YC/0.HA	Immature
ENSG00000224592	MIR3659HG	1.6642	2.61727	0.0064762	0.17637	1.YC/0.HA	Immature
ENSG00000117013	KCNQ4	4.66374	1.53691	2.44995e-07	0.000647067	1.YC/0.HA	Immature
ENSG00000142937	RPS8	-1.11945	7.219	0.00922395	0.205101	1.YC/0.HA	Immature
ENSG00000222009	BTBD19	2.55157	0.769319	0.0030908	0.128086	1.YC/0.HA	Immature
ENSG00000070759	TESK2	1.19156	4.83023	0.000938915	0.0690655	1.YC/0.HA	Immature
ENSG00000132122	SPATA6	1.49897	6.35196	0.010602	0.219495	1.YC/0.HA	Immature
ENSG00000085831	TTC39A	2.28572	1.64329	0.000484575	0.0484261	1.YC/0.HA	Immature
ENSG00000226759	DAB1-AS1	-1.87502	2.26267	0.0126146	0.231369	1.YC/0.HA	Immature
ENSG00000283445	AL136985.3	-2.26107	5.01862	1.98294e-05	0.00780011	1.YC/0.HA	Immature
ENSG00000177606	JUN	-1.56434	5.56363	0.00128858	0.08272	1.YC/0.HA	Immature
ENSG00000224609	AC093425.1	-1.78588	1.82086	0.0114771	0.224654	1.YC/0.HA	Immature
ENSG00000134716	CYP2J2	2.71924	2.93502	0.00387704	0.140363	1.YC/0.HA	Immature
ENSG00000125703	ATG4C	0.912991	6.54843	0.00571588	0.164092	1.YC/0.HA	Immature
ENSG00000184588	PDE4B	1.56761	9.16187	0.00785895	0.190678	1.YC/0.HA	Immature
ENSG00000152760	TCTEX1D1	2.10357	2.33897	0.00357874	0.135511	1.YC/0.HA	Immature
ENSG00000223883	LINC01707	-2.48878	1.72953	0.014923	0.24968	1.YC/0.HA	Immature
ENSG00000237324	AC093158.1	-1.85177	1.7734	0.00918258	0.205101	1.YC/0.HA	Immature
ENSG00000162621	LRRC53	-3.35746	3.80408	3.87903e-05	0.0110332	1.YC/0.HA	Immature
ENSG00000178965	ERICH3	-1.40483	7.24068	0.00485947	0.152274	1.YC/0.HA	Immature
ENSG00000230498	AL035409.1	-1.22502	5.00817	0.00655117	0.177332	1.YC/0.HA	Immature
ENSG00000287647	AC093575.1	-2.46579	2.30014	0.00635621	0.174839	1.YC/0.HA	Immature
ENSG00000162616	DNAJB4	-0.933451	4.44335	0.00857745	0.198722	1.YC/0.HA	Immature
ENSG00000234953	AL138799.4	-1.9673	3.58867	0.00021054	0.0290189	1.YC/0.HA	Immature
ENSG00000122432	SPATA1	-1.42164	3.79397	0.0080147	0.192623	1.YC/0.HA	Immature
ENSG00000097096	SYDE2	-1.52036	4.86957	0.00310141	0.128086	1.YC/0.HA	Immature
ENSG00000267272	LINC01140	2.5679	0.746421	0.00139089	0.0843109	1.YC/0.HA	Immature
ENSG00000162654	GBP4	1.67517	0.868344	0.0108519	0.221691	1.YC/0.HA	Immature
ENSG00000117525	F3	2.95282	3.30703	0.00024658	0.0318795	1.YC/0.HA	Immature
ENSG00000225206	MIR137HG	-0.975295	8.90444	0.013463	0.237958	1.YC/0.HA	Immature
ENSG00000117600	PLPPR4	-1.09349	7.99768	0.00589495	0.167163	1.YC/0.HA	Immature
ENSG00000122477	LRRC39	1.52722	3.52621	0.000288772	0.0341744	1.YC/0.HA	Immature
ENSG00000185946	RNPC3	-0.98737	7.35917	0.0114409	0.224654	1.YC/0.HA	Immature
ENSG00000134215	VAV3	1.61753	4.49525	0.00608514	0.170038	1.YC/0.HA	Immature
ENSG00000121957	GPSM2	0.944623	5.10711	0.0116628	0.224654	1.YC/0.HA	Immature
ENSG00000162650	ATXN7L2	-1.68884	2.73056	0.00380698	0.139373	1.YC/0.HA	Immature
ENSG00000134201	GSTM5	2.9264	0.345595	0.00369317	0.137383	1.YC/0.HA	Immature
ENSG00000116396	KCNC4	-1.3685	4.68722	0.000275674	0.0333642	1.YC/0.HA	Immature
ENSG00000168679	SLC16A4	-1.31827	3.29982	0.00669724	0.178579	1.YC/0.HA	Immature
ENSG00000238198	LRIG2-DT	-1.27723	4.04957	0.00389111	0.140363	1.YC/0.HA	Immature
ENSG00000175984	DENND2C	-1.66868	4.02954	0.00583517	0.16597	1.YC/0.HA	Immature
ENSG00000134259	NGF	2.87757	1.69344	0.000245442	0.0318795	1.YC/0.HA	Immature
ENSG00000116830	TTF2	1.40509	3.81298	0.0106304	0.219518	1.YC/0.HA	Immature
ENSG00000286219	NOTCH2NLC	1.3131	2.34106	0.0106363	0.219518	1.YC/0.HA	Immature
ENSG00000264522	OTUD7B	1.02183	5.01341	0.00768479	0.187712	1.YC/0.HA	Immature
ENSG00000143390	RFX5	1.85694	0.935077	0.0127611	0.23267	1.YC/0.HA	Immature
ENSG00000125462	C1orf61	1.206	5.95704	0.0030957	0.128086	1.YC/0.HA	Immature
ENSG00000158710	TAGLN2	-1.63143	2.19624	0.0134309	0.237618	1.YC/0.HA	Immature
ENSG00000248485	PCP4L1	2.1048	2.03427	0.00249817	0.114202	1.YC/0.HA	Immature
ENSG00000132196	HSD17B7	1.37245	3.53854	0.000178635	0.0270058	1.YC/0.HA	Immature
ENSG00000143248	RGS5	2.25138	3.85209	2.4827e-05	0.00903691	1.YC/0.HA	Immature
ENSG00000271917	AL357568.2	-1.28858	2.46545	0.00938998	0.206398	1.YC/0.HA	Immature
ENSG00000143171	RXRG	3.11464	0.949711	0.00356498	0.135511	1.YC/0.HA	Immature
ENSG00000143147	GPR161	2.1475	2.62787	0.00172421	0.0948415	1.YC/0.HA	Immature
ENSG00000117477	CCDC181	-1.15928	4.22288	0.00222065	0.106915	1.YC/0.HA	Immature
ENSG00000231407	GORAB-AS1	-1.44377	1.73195	0.0114562	0.224654	1.YC/0.HA	Immature
ENSG00000116132	PRRX1	2.39571	4.02128	0.000643058	0.0547781	1.YC/0.HA	Immature
ENSG00000271811	Z97200.1	2.73471	0.652289	0.00711848	0.182787	1.YC/0.HA	Immature
ENSG00000231424	BX284613.2	2.68646	3.57246	0.00323179	0.13036	1.YC/0.HA	Immature
ENSG00000117501	MROH9	1.98162	0.596661	0.0145991	0.24729	1.YC/0.HA	Immature
ENSG00000238272	AL139142.1	-3.08169	2.45093	0.000148298	0.024616	1.YC/0.HA	Immature
ENSG00000183831	ANKRD45	-1.83257	3.9591	0.00151846	0.087729	1.YC/0.HA	Immature
ENSG00000198216	CACNA1E	-1.36725	9.41326	0.0042184	0.142967	1.YC/0.HA	Immature
ENSG00000198756	COLGALT2	1.89317	5.94638	0.00271677	0.12074	1.YC/0.HA	Immature
ENSG00000285638	AL138927.1	4.4179	2.19611	3.65923e-06	0.00322151	1.YC/0.HA	Immature
ENSG00000066279	ASPM	2.1283	0.453781	0.00965883	0.209592	1.YC/0.HA	Immature
ENSG00000229989	MIR181A1HG	2.28361	6.73027	0.00151752	0.087729	1.YC/0.HA	Immature
ENSG00000203721	LINC00862	0.965466	4.12019	0.0143591	0.245579	1.YC/0.HA	Immature
ENSG00000133067	LGR6	4.40441	0.66739	1.11615e-05	0.00589582	1.YC/0.HA	Immature
ENSG00000143842	SOX13	1.87272	2.33053	0.00567131	0.163125	1.YC/0.HA	Immature
ENSG00000276600	RAB7B	2.51846	0.501893	0.00818922	0.194855	1.YC/0.HA	Immature
ENSG00000143479	DYRK3	-1.64449	4.09759	0.00302622	0.128086	1.YC/0.HA	Immature
ENSG00000123838	C4BPA	-2.32251	1.11404	0.00302273	0.128086	1.YC/0.HA	Immature
ENSG00000082497	SERTAD4	2.38447	1.69707	0.00443282	0.146745	1.YC/0.HA	Immature
ENSG00000123684	LPGAT1	0.85139	7.08849	0.00404486	0.142266	1.YC/0.HA	Immature
ENSG00000066027	PPP2R5A	1.21918	4.88284	0.00928574	0.205599	1.YC/0.HA	Immature
ENSG00000042781	USH2A	-1.6761	4.921	0.00784714	0.190641	1.YC/0.HA	Immature
ENSG00000092969	TGFB2	1.55364	4.14977	0.00141697	0.0845061	1.YC/0.HA	Immature
ENSG00000143507	DUSP10	2.03904	3.18114	0.00693902	0.180988	1.YC/0.HA	Immature
ENSG00000286174	AL596330.2	-1.84136	1.62234	0.0101485	0.214266	1.YC/0.HA	Immature
ENSG00000143793	C1orf35	-1.07568	3.57823	0.00907875	0.20467	1.YC/0.HA	Immature
ENSG00000182118	FAM89A	3.17251	1.84317	0.00259233	0.117181	1.YC/0.HA	Immature
ENSG00000119283	TRIM67	4.3046	1.80528	4.93374e-06	0.00355757	1.YC/0.HA	Immature
ENSG00000135750	KCNK1	-1.034	7.68682	0.0107783	0.221277	1.YC/0.HA	Immature
ENSG00000286263	AL391832.4	4.15049	2.24653	4.86894e-05	0.0126784	1.YC/0.HA	Immature
ENSG00000168243	GNG4	1.75095	3.15043	0.00720379	0.183196	1.YC/0.HA	Immature
ENSG00000117009	KMO	2.84066	2.40863	0.000636409	0.0547781	1.YC/0.HA	Immature
ENSG00000180287	PLD5	2.98397	5.73143	0.000512452	0.0494233	1.YC/0.HA	Immature
ENSG00000272865	AL591686.2	3.61647	1.89893	0.000555794	0.051122	1.YC/0.HA	Immature
ENSG00000179456	ZBTB18	-0.844492	6.40664	0.00897444	0.202588	1.YC/0.HA	Immature
ENSG00000235749	AL390860.1	2.60616	1.81658	5.83445e-05	0.0140087	1.YC/0.HA	Immature
ENSG00000237667	LINC01115	-4.1254	2.19872	0.00441728	0.146619	1.YC/0.HA	Immature
ENSG00000236008	LINC01814	2.42092	2.22182	0.00765128	0.18736	1.YC/0.HA	Immature
ENSG00000224184	MIR3681HG	1.82296	3.92811	0.000820869	0.0645941	1.YC/0.HA	Immature
ENSG00000071575	TRIB2	1.95793	2.95037	0.00599764	0.168535	1.YC/0.HA	Immature
ENSG00000223536	AC008164.1	-2.63134	2.96332	0.00415615	0.142967	1.YC/0.HA	Immature
ENSG00000170745	KCNS3	2.83552	3.03857	4.8072e-05	0.0126784	1.YC/0.HA	Immature
ENSG00000283031	AC009242.1	-1.5448	1.18876	0.0112557	0.224482	1.YC/0.HA	Immature
ENSG00000157851	DPYSL5	1.24353	5.17288	0.00293975	0.126361	1.YC/0.HA	Immature
ENSG00000084764	MAPRE3	-0.973525	6.09214	0.00216819	0.106046	1.YC/0.HA	Immature
ENSG00000230730	AC074011.1	-2.67793	2.18931	0.00450365	0.147369	1.YC/0.HA	Immature
ENSG00000213626	LBH	1.71437	2.02107	0.00311749	0.128086	1.YC/0.HA	Immature
ENSG00000013016	EHD3	-0.873091	4.89021	0.0073516	0.183473	1.YC/0.HA	Immature
ENSG00000049323	LTBP1	1.41379	4.95998	0.00478992	0.150862	1.YC/0.HA	Immature
ENSG00000228262	LINC01320	-1.87974	5.93983	0.00333042	0.131605	1.YC/0.HA	Immature
ENSG00000143921	ABCG8	2.19471	0.774097	0.00770626	0.187712	1.YC/0.HA	Immature
ENSG00000170802	FOXN2	1.04333	5.91793	0.00177115	0.0954663	1.YC/0.HA	Immature
ENSG00000228033	AC010967.1	-1.80639	3.58183	0.0119058	0.2255	1.YC/0.HA	Immature
ENSG00000198369	SPRED2	1.2311	6.06219	0.00421124	0.142967	1.YC/0.HA	Immature
ENSG00000204843	DCTN1	-1.15454	5.93607	0.00303687	0.128086	1.YC/0.HA	Immature
ENSG00000115423	DNAH6	-1.27361	7.47695	0.00497849	0.154042	1.YC/0.HA	Immature
ENSG00000153561	RMND5A	-0.785045	5.81701	0.0103439	0.217237	1.YC/0.HA	Immature
ENSG00000196872	KIAA1211L	-1.08114	8.422	0.0101162	0.21413	1.YC/0.HA	Immature
ENSG00000175874	CREG2	-0.998653	7.64219	0.00180517	0.0967361	1.YC/0.HA	Immature
ENSG00000256637	LINC01965	5.0189	1.83643	2.59063e-05	0.00903691	1.YC/0.HA	Immature
ENSG00000235597	LINC01102	2.49619	4.45837	1.44087e-06	0.00156699	1.YC/0.HA	Immature
ENSG00000233639	PANTR1	1.53252	6.01754	0.00522432	0.158219	1.YC/0.HA	Immature
ENSG00000135974	C2orf49	-1.0538	3.80196	0.0114326	0.224654	1.YC/0.HA	Immature
ENSG00000234162	AC009505.1	-1.2344	2.95029	0.0115805	0.224654	1.YC/0.HA	Immature
ENSG00000225588	AC096669.1	-3.061	1.72875	0.000135217	0.024616	1.YC/0.HA	Immature
ENSG00000237880	LINC01885	-2.46698	5.74512	0.0052029	0.158209	1.YC/0.HA	Immature
ENSG00000172965	MIR4435-2HG	-1.29127	6.69116	0.011572	0.224654	1.YC/0.HA	Immature
ENSG00000153208	MERTK	2.14542	4.67779	0.00133029	0.0828092	1.YC/0.HA	Immature
ENSG00000286545	AC092645.2	-1.43408	1.54195	0.0111209	0.222779	1.YC/0.HA	Immature
ENSG00000270019	AC110769.2	-1.71134	1.73735	0.00127032	0.0822232	1.YC/0.HA	Immature
ENSG00000144119	C1QL2	-1.97612	3.06139	0.00443695	0.146745	1.YC/0.HA	Immature
ENSG00000286481	AC011246.1	-1.93459	8.98335	0.00891596	0.202461	1.YC/0.HA	Immature
ENSG00000286971	AC012508.3	-1.70327	1.45901	0.00688177	0.180988	1.YC/0.HA	Immature
ENSG00000144230	GPR17	4.42835	1.83358	9.79139e-07	0.00129302	1.YC/0.HA	Immature
ENSG00000176771	NCKAP5	1.40577	7.58863	0.0148536	0.249257	1.YC/0.HA	Immature
ENSG00000286778	AC013265.1	4.82717	2.79334	8.39326e-05	0.0180725	1.YC/0.HA	Immature
ENSG00000226939	AC062021.1	4.14728	0.511847	0.000462521	0.0467272	1.YC/0.HA	Immature
ENSG00000231079	AC105402.3	2.82843	4.97726	0.000507955	0.0494233	1.YC/0.HA	Immature
ENSG00000231969	AC007364.1	1.02028	5.5944	0.00472934	0.149698	1.YC/0.HA	Immature
ENSG00000286889	AC096589.1	-2.19286	1.42427	0.00532073	0.158689	1.YC/0.HA	Immature
ENSG00000286530	AC108057.1	-2.78053	2.17189	0.00162076	0.0916347	1.YC/0.HA	Immature
ENSG00000123612	ACVR1C	-1.43897	6.5134	0.00449592	0.147369	1.YC/0.HA	Immature
ENSG00000234584	AC019186.1	-2.27685	4.47518	0.00922827	0.205101	1.YC/0.HA	Immature
ENSG00000007001	UPP2	-1.70825	8.3872	0.0111832	0.223518	1.YC/0.HA	Immature
ENSG00000153246	PLA2R1	1.53694	3.86129	0.00018181	0.0270058	1.YC/0.HA	Immature
ENSG00000153250	RBMS1	2.71176	5.28134	0.00114834	0.0789539	1.YC/0.HA	Immature
ENSG00000169507	SLC38A11	1.8819	4.76249	0.00566918	0.163125	1.YC/0.HA	Immature
ENSG00000071909	MYO3B	-1.7601	3.94144	0.00462964	0.1487	1.YC/0.HA	Immature
ENSG00000144355	DLX1	5.14783	1.31908	7.34732e-05	0.0163724	1.YC/0.HA	Immature
ENSG00000163364	LINC01116	1.56857	1.16785	0.0144339	0.245948	1.YC/0.HA	Immature
ENSG00000236501	AC074286.1	1.76991	2.02114	0.00469902	0.149626	1.YC/0.HA	Immature
ENSG00000116044	NFE2L2	1.04931	5.13592	0.0116257	0.224654	1.YC/0.HA	Immature
ENSG00000281131	SCHLAP1	-0.923194	6.30726	0.011624	0.224654	1.YC/0.HA	Immature
ENSG00000234663	LINC01934	-1.28424	4.2184	0.00190545	0.0975846	1.YC/0.HA	Immature
ENSG00000162992	NEUROD1	-1.97577	4.09496	0.00355256	0.135511	1.YC/0.HA	Immature
ENSG00000231689	LINC01090	1.86758	4.46411	0.0118899	0.225457	1.YC/0.HA	Immature
ENSG00000204262	COL5A2	2.29869	5.52298	1.3938e-05	0.00628504	1.YC/0.HA	Immature
ENSG00000128641	MYO1B	1.93253	4.06649	0.0119166	0.2255	1.YC/0.HA	Immature
ENSG00000081320	STK17B	-1.31875	5.06414	0.00609884	0.170038	1.YC/0.HA	Immature
ENSG00000225421	AC019330.1	2.49529	2.23698	0.000824665	0.0645941	1.YC/0.HA	Immature
ENSG00000119004	CYP20A1	1.4767	3.82252	0.000520119	0.0495669	1.YC/0.HA	Immature
ENSG00000223725	AC009226.1	2.28977	1.67448	0.00107858	0.0755332	1.YC/0.HA	Immature
ENSG00000178568	ERBB4	2.71907	9.44331	0.00380151	0.139373	1.YC/0.HA	Immature
ENSG00000286601	AC007563.4	-1.78172	1.72002	0.00141464	0.0845061	1.YC/0.HA	Immature
ENSG00000072182	ASIC4	2.78117	1.66947	0.00189065	0.0975846	1.YC/0.HA	Immature
ENSG00000114923	SLC4A3	-1.24703	3.97219	0.00398912	0.141863	1.YC/0.HA	Immature
ENSG00000163082	SGPP2	-1.13754	6.18879	0.00483609	0.151799	1.YC/0.HA	Immature
ENSG00000232023	LINC01807	1.39356	2.63368	0.00498847	0.154042	1.YC/0.HA	Immature
ENSG00000153823	PID1	1.17976	7.06835	0.00674646	0.178696	1.YC/0.HA	Immature
ENSG00000188042	ARL4C	2.51765	3.64012	0.00560655	0.163125	1.YC/0.HA	Immature
ENSG00000132321	IQCA1	-1.19376	6.20795	0.00911094	0.20467	1.YC/0.HA	Immature
ENSG00000286864	AC012076.1	-1.82939	2.44301	0.000146868	0.024616	1.YC/0.HA	Immature
ENSG00000186235	LINC02610	2.92314	0.36049	0.00412226	0.142721	1.YC/0.HA	Immature
ENSG00000068024	HDAC4	1.0712	6.68566	0.0141872	0.243993	1.YC/0.HA	Immature
ENSG00000225521	AC005237.1	-1.40453	3.82476	0.00922356	0.205101	1.YC/0.HA	Immature
ENSG00000188011	RTP5	-2.6222	2.52316	4.31019e-06	0.00332028	1.YC/0.HA	Immature
ENSG00000134115	CNTN6	1.84729	4.65784	0.00221338	0.106843	1.YC/0.HA	Immature
ENSG00000226022	AC026167.1	1.9256	1.34913	0.0120055	0.226256	1.YC/0.HA	Immature
ENSG00000227110	LMCD1-AS1	1.0423	6.87256	0.00406869	0.142266	1.YC/0.HA	Immature
ENSG00000134072	CAMK1	-1.15376	5.30253	0.00172878	0.0948415	1.YC/0.HA	Immature
ENSG00000157103	SLC6A1	2.28225	5.30514	0.00132149	0.0828092	1.YC/0.HA	Immature
ENSG00000154764	WNT7A	2.87833	1.07163	0.0105444	0.218585	1.YC/0.HA	Immature
ENSG00000144596	GRIP2	2.34138	2.69646	0.00715714	0.183017	1.YC/0.HA	Immature
ENSG00000154783	FGD5	2.70041	1.73147	8.49653e-06	0.00476012	1.YC/0.HA	Immature
ENSG00000272477	AC144521.1	3.33632	0.986708	0.00179846	0.0966565	1.YC/0.HA	Immature
ENSG00000114166	KAT2B	1.37707	6.33342	0.00189988	0.0975846	1.YC/0.HA	Immature
ENSG00000231304	SGO1-AS1	2.33857	4.6314	0.013785	0.240658	1.YC/0.HA	Immature
ENSG00000151789	ZNF385D	2.80599	7.06249	0.0001548	0.024672	1.YC/0.HA	Immature
ENSG00000224822	THRB-IT1	1.7625	2.37344	0.00228735	0.109562	1.YC/0.HA	Immature
ENSG00000033867	SLC4A7	-1.61844	8.20873	0.00465189	0.1487	1.YC/0.HA	Immature
ENSG00000144642	RBMS3	0.90076	7.90759	0.00949503	0.207745	1.YC/0.HA	Immature
ENSG00000163673	DCLK3	-1.81734	2.9754	0.0130058	0.234748	1.YC/0.HA	Immature
ENSG00000168032	ENTPD3	2.05373	3.68414	1.54958e-05	0.00666249	1.YC/0.HA	Immature
ENSG00000172888	ZNF621	1.62963	3.4346	4.94811e-05	0.0127056	1.YC/0.HA	Immature
ENSG00000008324	SS18L2	-0.955375	4.16562	0.00852597	0.198261	1.YC/0.HA	Immature
ENSG00000114646	CSPG5	1.59192	3.93223	0.00365488	0.136922	1.YC/0.HA	Immature
ENSG00000088543	C3orf18	1.88866	1.45917	0.00418519	0.142967	1.YC/0.HA	Immature
ENSG00000090097	PCBP4	1.56266	3.16384	0.0097087	0.210427	1.YC/0.HA	Immature
ENSG00000010327	STAB1	2.98927	0.808175	0.00337124	0.132032	1.YC/0.HA	Immature
ENSG00000056736	IL17RB	2.30559	1.99662	0.0117076	0.224766	1.YC/0.HA	Immature
ENSG00000168297	PXK	1.01437	6.48089	0.0103231	0.217126	1.YC/0.HA	Immature
ENSG00000241472	PTPRG-AS1	-1.75633	6.66462	0.00818417	0.194855	1.YC/0.HA	Immature
ENSG00000163377	TAFA4	1.53863	3.37197	0.00421504	0.142967	1.YC/0.HA	Immature
ENSG00000114541	FRMD4B	0.935408	7.21699	0.0131164	0.234945	1.YC/0.HA	Immature
ENSG00000187098	MITF	1.46409	5.49788	0.00473678	0.149698	1.YC/0.HA	Immature
ENSG00000239440	LINC02008	2.42688	3.28333	5.52247e-06	0.00364641	1.YC/0.HA	Immature
ENSG00000287158	AC117464.1	3.02934	1.38637	0.000574062	0.052282	1.YC/0.HA	Immature
ENSG00000241648	CADM2-AS2	-1.43198	3.39333	0.0147617	0.248556	1.YC/0.HA	Immature
ENSG00000206538	VGLL3	-5.20779	5.39525	0.00182862	0.0974279	1.YC/0.HA	Immature
ENSG00000281392	AC107204.1	-1.37272	6.10024	0.00232784	0.110635	1.YC/0.HA	Immature
ENSG00000080819	CPOX	1.15494	4.36362	0.00840973	0.197466	1.YC/0.HA	Immature
ENSG00000057019	DCBLD2	2.23156	4.50936	0.0001877	0.0270058	1.YC/0.HA	Immature
ENSG00000154175	ABI3BP	2.55505	3.53986	4.19703e-06	0.00332028	1.YC/0.HA	Immature
ENSG00000144815	NXPE3	0.822945	5.66641	0.0145819	0.24729	1.YC/0.HA	Immature
ENSG00000114487	MORC1	3.83998	1.98756	0.000531751	0.0499036	1.YC/0.HA	Immature
ENSG00000242029	AC078980.1	1.83765	1.19303	0.00589608	0.167163	1.YC/0.HA	Immature
ENSG00000242242	NECTIN3-AS1	2.3435	3.66649	0.00311763	0.128086	1.YC/0.HA	Immature
ENSG00000177707	NECTIN3	2.46213	6.14206	0.0101227	0.21413	1.YC/0.HA	Immature
ENSG00000144824	PHLDB2	2.86352	2.97541	0.0024986	0.114202	1.YC/0.HA	Immature
ENSG00000242767	ZBTB20-AS4	-3.05689	1.24754	0.00581024	0.165623	1.YC/0.HA	Immature
ENSG00000241397	LINC00903	-2.00833	3.79365	0.00025482	0.0323395	1.YC/0.HA	Immature
ENSG00000243197	TUSC7	-1.51131	3.69358	0.0118252	0.22509	1.YC/0.HA	Immature
ENSG00000242385	LINC00901	-1.79039	2.77761	0.0134251	0.237618	1.YC/0.HA	Immature
ENSG00000241213	LINC02024	-1.34806	3.22389	0.0055857	0.162884	1.YC/0.HA	Immature
ENSG00000031081	ARHGAP31	2.45915	4.03791	0.0140073	0.242779	1.YC/0.HA	Immature
ENSG00000175697	GPR156	1.8838	1.41421	0.00493917	0.153622	1.YC/0.HA	Immature
ENSG00000163430	FSTL1	2.23376	3.21038	0.00062728	0.0547781	1.YC/0.HA	Immature
ENSG00000286827	AC072026.2	-1.6527	1.71026	0.00333142	0.131605	1.YC/0.HA	Immature
ENSG00000163406	SLC15A2	1.37487	4.22158	0.000389572	0.0413932	1.YC/0.HA	Immature
ENSG00000065534	MYLK	1.64783	3.88105	0.000819172	0.0645941	1.YC/0.HA	Immature
ENSG00000173706	HEG1	1.44699	3.4864	0.00892612	0.202461	1.YC/0.HA	Immature
ENSG00000184897	H1FX	-1.12082	4.33663	0.01213	0.226754	1.YC/0.HA	Immature
ENSG00000251287	ALG1L2	-1.41723	1.88729	0.0118199	0.22509	1.YC/0.HA	Immature
ENSG00000248724	NPHP3-AS1	-1.52679	2.9062	0.00238128	0.112381	1.YC/0.HA	Immature
ENSG00000158220	ESYT3	-1.51249	4.62717	0.00552594	0.161908	1.YC/0.HA	Immature
ENSG00000175093	SPSB4	3.12743	1.48881	0.000723526	0.0587229	1.YC/0.HA	Immature
ENSG00000181744	DIPK2A	0.946126	5.49897	0.0018477	0.0975846	1.YC/0.HA	Immature
ENSG00000181631	P2RY13	2.23882	2.23396	0.00337583	0.132032	1.YC/0.HA	Immature
ENSG00000152580	IGSF10	-1.07003	4.45509	0.0105192	0.218516	1.YC/0.HA	Immature
ENSG00000243486	AC068985.1	-3.607	3.38261	0.0114553	0.224654	1.YC/0.HA	Immature
ENSG00000197415	VEPH1	-2.04465	3.18521	0.000821782	0.0645941	1.YC/0.HA	Immature
ENSG00000244040	IL12A-AS1	2.28033	3.51132	0.0148836	0.249257	1.YC/0.HA	Immature
ENSG00000213186	TRIM59	2.24545	4.13334	0.00708369	0.182146	1.YC/0.HA	Immature
ENSG00000260572	AC069224.1	-1.24818	2.07829	0.0100625	0.21408	1.YC/0.HA	Immature
ENSG00000288087	AC112770.1	4.59374	3.08282	0.00497129	0.154042	1.YC/0.HA	Immature
ENSG00000241636	LINC01323	-2.96694	1.16045	0.0128916	0.233822	1.YC/0.HA	Immature
ENSG00000241767	LINC01324	-3.85741	3.99452	0.0123012	0.228337	1.YC/0.HA	Immature
ENSG00000121871	SLITRK3	-1.00076	4.69125	0.00509139	0.155586	1.YC/0.HA	Immature
ENSG00000244128	LINC01322	-1.94524	9.6116	0.00646147	0.17637	1.YC/0.HA	Immature
ENSG00000228213	NLGN1-AS1	-1.70754	2.24213	0.00725935	0.183348	1.YC/0.HA	Immature
ENSG00000242808	SOX2-OT	1.0498	7.94141	0.00250172	0.114202	1.YC/0.HA	Immature
ENSG00000181449	SOX2	1.93151	4.07253	0.0117406	0.224933	1.YC/0.HA	Immature
ENSG00000244405	ETV5	1.51803	5.27359	0.0108802	0.221878	1.YC/0.HA	Immature
ENSG00000157005	SST	5.07734	3.78392	1.37735e-18	2.54644e-14	1.YC/0.HA	Immature
ENSG00000113916	BCL6	1.29897	3.97427	0.00718435	0.183196	1.YC/0.HA	Immature
ENSG00000145012	LPP	1.22926	7.0745	0.00082804	0.0645941	1.YC/0.HA	Immature
ENSG00000188729	OSTN	2.92725	0.81277	0.00459984	0.148675	1.YC/0.HA	Immature
ENSG00000163958	ZDHHC19	-2.48346	3.31826	0.000594481	0.0530955	1.YC/0.HA	Immature
ENSG00000127418	FGFRL1	2.03409	0.918891	0.0116653	0.224654	1.YC/0.HA	Immature
ENSG00000159674	SPON2	-1.43161	3.42326	0.00913963	0.204816	1.YC/0.HA	Immature
ENSG00000288380	CRIPAK	1.3349	2.85265	0.00317425	0.129788	1.YC/0.HA	Immature
ENSG00000087266	SH3BP2	2.49185	2.23078	0.0133052	0.237417	1.YC/0.HA	Immature
ENSG00000152953	STK32B	1.90546	3.79291	0.0117225	0.224818	1.YC/0.HA	Immature
ENSG00000072840	EVC	2.21049	0.937417	0.00643279	0.17637	1.YC/0.HA	Immature
ENSG00000249631	AC005699.1	1.75784	2.10662	0.0129911	0.234748	1.YC/0.HA	Immature
ENSG00000250634	LINC01182	1.1685	3.79613	0.00565971	0.163125	1.YC/0.HA	Immature
ENSG00000249252	AC098829.1	1.01204	5.42033	0.00153331	0.0880367	1.YC/0.HA	Immature
ENSG00000007062	PROM1	2.93735	1.89568	4.14772e-06	0.00332028	1.YC/0.HA	Immature
ENSG00000250243	AC110296.1	-1.00734	6.62949	0.0139598	0.242565	1.YC/0.HA	Immature
ENSG00000250092	AC096576.3	-1.27656	5.8481	0.0100925	0.21413	1.YC/0.HA	Immature
ENSG00000248343	AC096576.2	-1.07299	6.17169	0.00352324	0.134898	1.YC/0.HA	Immature
ENSG00000261121	LINC02473	2.85568	0.71946	0.00694559	0.180988	1.YC/0.HA	Immature
ENSG00000153012	LGI2	2.82038	1.67538	0.00309133	0.128086	1.YC/0.HA	Immature
ENSG00000288321	AC079772.1	-3.90391	6.91978	0.0028565	0.124422	1.YC/0.HA	Immature
ENSG00000250723	AC016687.2	2.56972	3.8539	0.00069223	0.0576484	1.YC/0.HA	Immature
ENSG00000078177	N4BP2	-1.12576	5.64192	0.00675635	0.178696	1.YC/0.HA	Immature
ENSG00000285454	AC111006.1	2.30896	2.95464	0.00141118	0.0845061	1.YC/0.HA	Immature
ENSG00000249330	AC095060.1	-1.16277	3.4244	0.0115745	0.224654	1.YC/0.HA	Immature
ENSG00000074966	TXK	3.6706	2.16806	0.000353272	0.0388767	1.YC/0.HA	Immature
ENSG00000135605	TEC	3.19552	1.46968	0.00074327	0.0600069	1.YC/0.HA	Immature
ENSG00000075539	FRYL	0.997846	7.95709	0.00878705	0.201307	1.YC/0.HA	Immature
ENSG00000248184	LINC02283	4.58507	0.805843	2.66192e-05	0.0090548	1.YC/0.HA	Immature
ENSG00000134851	TMEM165	1.5164	7.26565	0.00209626	0.103903	1.YC/0.HA	Immature
ENSG00000109255	NMU	4.38608	0.691734	0.00132368	0.0828092	1.YC/0.HA	Immature
ENSG00000084093	REST	1.79023	2.54099	0.00729173	0.183473	1.YC/0.HA	Immature
ENSG00000248049	UBA6-AS1	0.980271	7.15661	0.00937204	0.206398	1.YC/0.HA	Immature
ENSG00000163749	CCDC158	1.54224	2.32742	0.00239951	0.112381	1.YC/0.HA	Immature
ENSG00000138771	SHROOM3	2.25272	4.97001	0.00421861	0.142967	1.YC/0.HA	Immature
ENSG00000138759	FRAS1	2.30435	6.40135	0.0113897	0.224654	1.YC/0.HA	Immature
ENSG00000138669	PRKG2	1.62298	4.12845	0.00322817	0.13036	1.YC/0.HA	Immature
ENSG00000145284	SCD5	1.28174	7.44331	0.00129676	0.0828092	1.YC/0.HA	Immature
ENSG00000245322	AC097460.1	-0.954287	4.12174	0.00791397	0.191585	1.YC/0.HA	Immature
ENSG00000168743	NPNT	2.45984	2.35924	0.00029391	0.0343911	1.YC/0.HA	Immature
ENSG00000170522	ELOVL6	0.866427	6.00505	0.0109013	0.221878	1.YC/0.HA	Immature
ENSG00000173376	NDNF	4.23192	1.1906	3.86355e-07	0.000714293	1.YC/0.HA	Immature
ENSG00000186867	QRFPR	4.10687	1.22396	0.000185488	0.0270058	1.YC/0.HA	Immature
ENSG00000138741	TRPC3	4.03511	2.88005	1.10401e-06	0.00136073	1.YC/0.HA	Immature
ENSG00000138685	FGF2	2.17675	3.69935	0.0142072	0.24411	1.YC/0.HA	Immature
ENSG00000249464	LINC01091	2.75417	3.45395	0.000459105	0.046637	1.YC/0.HA	Immature
ENSG00000196159	FAT4	-1.9984	7.38305	0.00835378	0.197107	1.YC/0.HA	Immature
ENSG00000250241	AC105383.1	2.00276	4.84972	0.0126079	0.231369	1.YC/0.HA	Immature
ENSG00000189184	PCDH18	1.85528	1.28655	0.00349865	0.134476	1.YC/0.HA	Immature
ENSG00000286066	AC097375.4	-1.45053	2.595	0.0073196	0.183473	1.YC/0.HA	Immature
ENSG00000286720	AC097375.5	-1.56272	1.51999	0.00132122	0.0828092	1.YC/0.HA	Immature
ENSG00000121210	TMEM131L	1.35562	5.07975	0.000171792	0.026916	1.YC/0.HA	Immature
ENSG00000250910	AC097467.3	-1.85801	5.75336	0.00729646	0.183473	1.YC/0.HA	Immature
ENSG00000250538	AC104407.1	-3.63834	2.72226	0.000259594	0.0324079	1.YC/0.HA	Immature
ENSG00000248431	AC021134.1	2.88523	2.51294	0.000367257	0.03969	1.YC/0.HA	Immature
ENSG00000198498	TMA16	-0.900872	4.40525	0.0133633	0.237417	1.YC/0.HA	Immature
ENSG00000249500	LINC01179	-3.65869	1.76808	0.00668009	0.178579	1.YC/0.HA	Immature
ENSG00000154447	SH3RF1	1.11386	6.04612	0.00707284	0.182121	1.YC/0.HA	Immature
ENSG00000109586	GALNT7	1.42716	6.08944	5.03747e-05	0.0127579	1.YC/0.HA	Immature
ENSG00000164106	SCRG1	1.32622	3.97585	0.0115576	0.224654	1.YC/0.HA	Immature
ENSG00000248174	LINC02268	-2.23183	5.18699	0.00600585	0.168535	1.YC/0.HA	Immature
ENSG00000164120	HPGD	2.68247	0.565506	0.00159677	0.0911146	1.YC/0.HA	Immature
ENSG00000250131	AC078881.1	1.33811	4.43699	0.00103574	0.0733266	1.YC/0.HA	Immature
ENSG00000083857	FAT1	2.20212	3.44396	0.00667686	0.178579	1.YC/0.HA	Immature
ENSG00000245685	FRG1-DT	-1.16378	5.00467	0.00408619	0.142539	1.YC/0.HA	Immature
ENSG00000287600	AC122719.3	-3.01653	1.06062	7.30662e-06	0.00441328	1.YC/0.HA	Immature
ENSG00000113504	SLC12A7	3.20802	0.975088	0.00184249	0.0975846	1.YC/0.HA	Immature
ENSG00000183654	MARCH11	1.27361	4.95254	0.00760709	0.186908	1.YC/0.HA	Immature
ENSG00000145555	MYO10	1.49077	4.29297	0.00578375	0.165465	1.YC/0.HA	Immature
ENSG00000249937	LINC02223	-1.83665	7.32028	0.000629305	0.0547781	1.YC/0.HA	Immature
ENSG00000286961	AC091938.1	-1.73537	5.15633	0.000453951	0.046637	1.YC/0.HA	Immature
ENSG00000287176	AC099517.1	3.84907	2.89963	0.0061198	0.17014	1.YC/0.HA	Immature
ENSG00000113389	NPR3	3.36107	1.25405	3.12189e-05	0.00946189	1.YC/0.HA	Immature
ENSG00000151388	ADAMTS12	2.82518	1.68303	2.69372e-05	0.0090548	1.YC/0.HA	Immature
ENSG00000113594	LIFR	0.880462	6.62728	0.0120889	0.226754	1.YC/0.HA	Immature
ENSG00000164512	ANKRD55	2.45329	3.52214	5.679e-05	0.0138149	1.YC/0.HA	Immature
ENSG00000130449	ZSWIM6	0.871496	8.38224	0.00428932	0.143868	1.YC/0.HA	Immature
ENSG00000178722	C5orf64	2.44529	4.53489	0.0120209	0.226308	1.YC/0.HA	Immature
ENSG00000214944	ARHGEF28	-1.43364	7.24881	0.00666895	0.178579	1.YC/0.HA	Immature
ENSG00000164346	NSA2	-1.02609	5.041	0.00713976	0.183017	1.YC/0.HA	Immature
ENSG00000122012	SV2C	3.1619	3.78679	0.000405579	0.0428477	1.YC/0.HA	Immature
ENSG00000132840	BHMT2	1.30703	1.85746	0.00995359	0.213637	1.YC/0.HA	Immature
ENSG00000164309	CMYA5	1.24707	4.04809	0.000870912	0.066261	1.YC/0.HA	Immature
ENSG00000164300	SERINC5	2.01055	5.4471	0.00480151	0.15097	1.YC/0.HA	Immature
ENSG00000145681	HAPLN1	3.31853	1.91859	3.08311e-07	0.000712507	1.YC/0.HA	Immature
ENSG00000248708	LINC02144	1.25965	1.94156	0.0136186	0.238881	1.YC/0.HA	Immature
ENSG00000249175	AC008534.1	-1.92085	1.59995	0.00330342	0.131605	1.YC/0.HA	Immature
ENSG00000164291	ARSK	-1.10303	4.39052	0.00399804	0.141863	1.YC/0.HA	Immature
ENSG00000175426	PCSK1	2.69355	3.73465	0.00668734	0.178579	1.YC/0.HA	Immature
ENSG00000246763	RGMB-AS1	-2.18726	0.995259	0.00564435	0.163125	1.YC/0.HA	Immature
ENSG00000112893	MAN2A1	1.61268	8.28481	0.00735333	0.183473	1.YC/0.HA	Immature
ENSG00000092421	SEMA6A	1.30469	5.84237	0.00288039	0.124422	1.YC/0.HA	Immature
ENSG00000249150	AC010267.1	-2.60171	2.30321	0.001706	0.0941511	1.YC/0.HA	Immature
ENSG00000229855	AC008568.1	4.40381	1.53301	0.00535168	0.15907	1.YC/0.HA	Immature
ENSG00000253807	LINC01170	1.43683	5.72504	0.000249885	0.0320824	1.YC/0.HA	Immature
ENSG00000164241	C5orf63	1.90552	1.7669	0.00690017	0.180988	1.YC/0.HA	Immature
ENSG00000205279	CTXN3	2.94463	0.84259	0.00600738	0.168535	1.YC/0.HA	Immature
ENSG00000064651	SLC12A2	1.12159	6.7753	0.000709182	0.0580814	1.YC/0.HA	Immature
ENSG00000138829	FBN2	3.0766	2.60243	9.23015e-06	0.00501903	1.YC/0.HA	Immature
ENSG00000113396	SLC27A6	1.90308	2.80911	0.000425971	0.0447463	1.YC/0.HA	Immature
ENSG00000224186	C5orf66	-1.25177	2.61633	0.00980845	0.211698	1.YC/0.HA	Immature
ENSG00000170458	CD14	2.40313	2.13835	0.00462198	0.1487	1.YC/0.HA	Immature
ENSG00000272154	AC244517.2	-1.73143	2.59177	0.00339222	0.132032	1.YC/0.HA	Immature
ENSG00000187678	SPRY4	3.50902	2.6686	4.62872e-05	0.0124023	1.YC/0.HA	Immature
ENSG00000231185	SPRY4-AS1	3.23836	5.18873	0.00395286	0.141082	1.YC/0.HA	Immature
ENSG00000236714	LINC01844	3.07054	1.42063	0.00118082	0.0793854	1.YC/0.HA	Immature
ENSG00000249429	AC016598.1	4.42875	2.69362	0.00215346	0.105605	1.YC/0.HA	Immature
ENSG00000249881	AC008696.2	3.72242	2.98396	0.000120294	0.0236051	1.YC/0.HA	Immature
ENSG00000169302	STK32A	0.82345	3.96275	0.0130983	0.234945	1.YC/0.HA	Immature
ENSG00000164270	HTR4	-1.29114	7.26829	0.0108332	0.221553	1.YC/0.HA	Immature
ENSG00000249669	CARMN	2.53573	1.06992	0.00507682	0.155575	1.YC/0.HA	Immature
ENSG00000183876	ARSI	2.62401	1.39877	0.00221086	0.106843	1.YC/0.HA	Immature
ENSG00000164574	GALNT10	1.56431	4.58658	0.000637371	0.0547781	1.YC/0.HA	Immature
ENSG00000170271	FAXDC2	0.99361	4.67513	0.0133407	0.237417	1.YC/0.HA	Immature
ENSG00000170624	SGCD	1.08719	7.78179	0.0110651	0.222361	1.YC/0.HA	Immature
ENSG00000249738	AC008691.1	-1.64521	6.73287	0.00822516	0.195208	1.YC/0.HA	Immature
ENSG00000253311	LINC01847	-1.97866	3.1891	0.00729384	0.183473	1.YC/0.HA	Immature
ENSG00000254186	AC113414.1	1.12625	4.45186	0.00241687	0.112381	1.YC/0.HA	Immature
ENSG00000254187	AC008708.2	-1.42255	3.8228	0.0104764	0.218079	1.YC/0.HA	Immature
ENSG00000253925	AC011369.1	-1.51144	4.12454	0.000264691	0.0324079	1.YC/0.HA	Immature
ENSG00000184347	SLIT3	-1.5082	9.51765	0.00671029	0.178579	1.YC/0.HA	Immature
ENSG00000254042	AC011365.1	-2.70794	1.57682	0.00014593	0.024616	1.YC/0.HA	Immature
ENSG00000248222	AC011389.1	-2.01244	3.24163	0.00219426	0.106695	1.YC/0.HA	Immature
ENSG00000182132	KCNIP1	2.32492	5.48264	0.0141384	0.243608	1.YC/0.HA	Immature
ENSG00000204764	RANBP17	3.03489	5.24655	0.00686103	0.180951	1.YC/0.HA	Immature
ENSG00000174705	SH3PXD2B	1.04566	4.82015	0.0100481	0.214021	1.YC/0.HA	Immature
ENSG00000253686	LINC01484	-1.93755	3.15243	0.0019007	0.0975846	1.YC/0.HA	Immature
ENSG00000145920	CPLX2	-1.27318	6.64332	0.000147373	0.024616	1.YC/0.HA	Immature
ENSG00000250820	AC138965.2	-2.82584	2.71756	0.000183468	0.0270058	1.YC/0.HA	Immature
ENSG00000051596	THOC3	-3.02496	6.32787	0.000379375	0.0405427	1.YC/0.HA	Immature
ENSG00000250801	AC138965.1	-4.58538	1.83414	0.00632209	0.174192	1.YC/0.HA	Immature
ENSG00000250992	AC139491.3	-4.30243	1.54271	1.52662e-05	0.00666249	1.YC/0.HA	Immature
ENSG00000251458	AC139491.4	-2.4446	3.20479	0.00998041	0.213637	1.YC/0.HA	Immature
ENSG00000169258	GPRIN1	-1.27133	3.91089	0.00134243	0.0830696	1.YC/0.HA	Immature
ENSG00000074317	SNCB	-0.914257	5.55815	0.0112119	0.22385	1.YC/0.HA	Immature
ENSG00000131188	PRR7	-1.03585	3.87979	0.00998391	0.213637	1.YC/0.HA	Immature
ENSG00000249186	AC140125.3	-3.97896	0.811692	0.00206007	0.102659	1.YC/0.HA	Immature
ENSG00000250101	AC106795.3	-1.98665	6.08516	0.0127989	0.23267	1.YC/0.HA	Immature
ENSG00000249684	AC106795.2	-2.17382	2.00233	0.00239656	0.112381	1.YC/0.HA	Immature
ENSG00000145911	N4BP3	3.20107	0.60442	0.00502795	0.15467	1.YC/0.HA	Immature
ENSG00000177932	ZNF354C	1.51191	2.90005	0.000364968	0.03969	1.YC/0.HA	Immature
ENSG00000213316	LTC4S	1.90641	1.68016	0.00187806	0.0975846	1.YC/0.HA	Immature
ENSG00000286364	AL512308.1	3.6298	2.42382	5.26678e-06	0.00360638	1.YC/0.HA	Immature
ENSG00000286785	LINC01622	3.26492	1.21486	0.0145515	0.247268	1.YC/0.HA	Immature
ENSG00000124785	NRN1	-1.30961	6.60644	0.000833891	0.0647772	1.YC/0.HA	Immature
ENSG00000238221	AL139095.4	-1.43773	2.10197	0.00457462	0.148118	1.YC/0.HA	Immature
ENSG00000197977	ELOVL2	1.90968	3.05098	0.00393315	0.140939	1.YC/0.HA	Immature
ENSG00000111859	NEDD9	1.15956	3.74725	0.00123026	0.0815235	1.YC/0.HA	Immature
ENSG00000095951	HIVEP1	0.936159	5.83338	0.0053692	0.159225	1.YC/0.HA	Immature
ENSG00000007944	MYLIP	1.69061	3.80422	0.0052614	0.158596	1.YC/0.HA	Immature
ENSG00000172197	MBOAT1	2.63219	1.22209	0.00114878	0.0789539	1.YC/0.HA	Immature
ENSG00000124766	SOX4	1.62749	2.42792	0.00298655	0.127518	1.YC/0.HA	Immature
ENSG00000272168	CASC15	1.65703	6.76494	0.000134043	0.024616	1.YC/0.HA	Immature
ENSG00000286954	AL033539.2	3.21246	1.75161	0.00213069	0.104877	1.YC/0.HA	Immature
ENSG00000233358	AL035401.1	2.61912	1.03248	0.00701905	0.180988	1.YC/0.HA	Immature
ENSG00000124508	BTN2A2	-2.35648	1.91738	0.000681839	0.0572993	1.YC/0.HA	Immature
ENSG00000243729	OR5V1	-3.05815	2.26844	0.014635	0.247324	1.YC/0.HA	Immature
ENSG00000213760	ATP6V1G2	-0.872749	5.30796	0.0140115	0.242779	1.YC/0.HA	Immature
ENSG00000230313	HCG24	-3.1251	1.60322	0.00257872	0.116851	1.YC/0.HA	Immature
ENSG00000197283	SYNGAP1	-0.881309	5.269	0.0100797	0.21413	1.YC/0.HA	Immature
ENSG00000124493	GRM4	2.02876	2.04112	0.00875839	0.201149	1.YC/0.HA	Immature
ENSG00000064999	ANKS1A	0.97246	6.321	0.00277104	0.121869	1.YC/0.HA	Immature
ENSG00000164627	KIF6	1.48068	5.3216	0.0133682	0.237417	1.YC/0.HA	Immature
ENSG00000112561	TFEB	1.00181	4.14297	0.00930317	0.205738	1.YC/0.HA	Immature
ENSG00000172348	RCAN2	2.08399	6.98612	0.0082819	0.19624	1.YC/0.HA	Immature
ENSG00000236466	AL035670.1	2.30945	1.30066	0.00695413	0.180988	1.YC/0.HA	Immature
ENSG00000146072	TNFRSF21	0.885533	5.07277	0.00664147	0.178579	1.YC/0.HA	Immature
ENSG00000244694	PTCHD4	2.91357	5.34737	0.00390899	0.140602	1.YC/0.HA	Immature
ENSG00000012660	ELOVL5	0.81633	5.55874	0.010115	0.21413	1.YC/0.HA	Immature
ENSG00000137269	LRRC1	1.97767	5.13813	0.0141131	0.243398	1.YC/0.HA	Immature
ENSG00000124749	COL21A1	-1.22971	6.64012	0.0130141	0.234748	1.YC/0.HA	Immature
ENSG00000225096	AL445250.1	1.20474	5.34393	0.0109251	0.221878	1.YC/0.HA	Immature
ENSG00000250686	KHDRBS2-OT	1.30972	5.24378	0.0114156	0.224654	1.YC/0.HA	Immature
ENSG00000112280	COL9A1	2.10949	2.98528	0.000856305	0.065964	1.YC/0.HA	Immature
ENSG00000233237	LINC00472	2.10205	4.68923	1.2822e-05	0.00623825	1.YC/0.HA	Immature
ENSG00000156535	CD109	-1.68257	3.78857	9.14443e-05	0.0192136	1.YC/0.HA	Immature
ENSG00000118407	FILIP1	-1.51741	5.29365	0.0104507	0.217921	1.YC/0.HA	Immature
ENSG00000231533	AL391840.1	-1.64652	9.07374	0.00462005	0.1487	1.YC/0.HA	Immature
ENSG00000135338	LCA5	-1.54541	6.08593	0.00193664	0.0986442	1.YC/0.HA	Immature
ENSG00000287811	AL391840.3	-1.70698	5.17078	0.000592546	0.0530955	1.YC/0.HA	Immature
ENSG00000112773	TENT5A	2.3167	3.04695	0.0135745	0.238881	1.YC/0.HA	Immature
ENSG00000146242	TPBG	4.3216	1.92539	0.0002041	0.0288046	1.YC/0.HA	Immature
ENSG00000203877	RIPPLY2	-1.50384	3.47065	0.000181975	0.0270058	1.YC/0.HA	Immature
ENSG00000146278	PNRC1	-1.20551	5.47901	0.0123848	0.228514	1.YC/0.HA	Immature
ENSG00000288009	AL353135.2	-1.42275	2.65962	0.0106961	0.220457	1.YC/0.HA	Immature
ENSG00000260271	AL132996.1	1.70125	0.646276	0.0146273	0.247324	1.YC/0.HA	Immature
ENSG00000135333	EPHA7	-1.71033	9.03342	0.00417543	0.142967	1.YC/0.HA	Immature
ENSG00000287578	AL034348.1	1.49307	3.40315	0.00578813	0.165465	1.YC/0.HA	Immature
ENSG00000271860	AL589740.1	2.90957	6.94485	0.000515939	0.0494233	1.YC/0.HA	Immature
ENSG00000187772	LIN28B	2.56905	3.7463	0.00978172	0.211574	1.YC/0.HA	Immature
ENSG00000272398	CD24	-1.82882	5.34651	0.00400834	0.141863	1.YC/0.HA	Immature
ENSG00000112333	NR2E1	3.15624	0.95688	0.00363842	0.136722	1.YC/0.HA	Immature
ENSG00000118689	FOXO3	1.02721	6.61257	0.00342601	0.132788	1.YC/0.HA	Immature
ENSG00000203797	DDO	-2.22252	3.72988	0.011432	0.224654	1.YC/0.HA	Immature
ENSG00000227502	LINC01268	2.75837	1.76839	1.36805e-05	0.00628504	1.YC/0.HA	Immature
ENSG00000249853	HS3ST5	2.42002	6.14962	0.000107567	0.0216163	1.YC/0.HA	Immature
ENSG00000178425	NT5DC1	0.961361	6.47778	0.00130832	0.0828092	1.YC/0.HA	Immature
ENSG00000203760	CENPW	-2.38248	3.08714	7.40002e-06	0.00441328	1.YC/0.HA	Immature
ENSG00000287731	AL035603.1	-3.1917	1.11161	0.000333034	0.0373159	1.YC/0.HA	Immature
ENSG00000227945	AL590006.1	-1.75621	4.66409	0.0135064	0.238498	1.YC/0.HA	Immature
ENSG00000196569	LAMA2	1.65027	5.86927	0.000784541	0.0625198	1.YC/0.HA	Immature
ENSG00000203756	TMEM244	-2.18208	5.0167	0.00325695	0.13036	1.YC/0.HA	Immature
ENSG00000198945	L3MBTL3	-1.13338	4.95273	0.00719878	0.183196	1.YC/0.HA	Immature
ENSG00000236166	AL021408.1	3.21773	0.99691	0.0026879	0.119744	1.YC/0.HA	Immature
ENSG00000112319	EYA4	-2.25228	6.77866	0.0148842	0.249257	1.YC/0.HA	Immature
ENSG00000223542	AL024497.1	-3.4684	1.5377	0.00981313	0.211698	1.YC/0.HA	Immature
ENSG00000118515	SGK1	1.07506	7.13559	0.00455082	0.147744	1.YC/0.HA	Immature
ENSG00000171408	PDE7B	2.5957	6.18196	4.66204e-07	0.000718265	1.YC/0.HA	Immature
ENSG00000234263	AL024508.1	-1.67981	2.16627	0.000890673	0.0668176	1.YC/0.HA	Immature
ENSG00000254440	PBOV1	-2.91718	1.47211	0.00327105	0.130616	1.YC/0.HA	Immature
ENSG00000051620	HEBP2	-1.52466	3.14927	0.00561213	0.163125	1.YC/0.HA	Immature
ENSG00000024862	CCDC28A	-1.18296	5.9833	0.00399111	0.141863	1.YC/0.HA	Immature
ENSG00000203734	ECT2L	-1.51597	4.43452	0.00304624	0.128086	1.YC/0.HA	Immature
ENSG00000164440	TXLNB	-1.81815	3.51954	0.00098763	0.0713254	1.YC/0.HA	Immature
ENSG00000112425	EPM2A	0.896665	5.39885	0.0133462	0.237417	1.YC/0.HA	Immature
ENSG00000233452	STXBP5-AS1	1.73578	5.90938	0.00547901	0.161117	1.YC/0.HA	Immature
ENSG00000281021	AL078581.4	-1.19679	2.75227	0.0117891	0.22509	1.YC/0.HA	Immature
ENSG00000091831	ESR1	-1.1011	4.15964	0.00499085	0.154042	1.YC/0.HA	Immature
ENSG00000146469	VIP	7.22691	3.00863	5.1472e-10	3.17205e-06	1.YC/0.HA	Immature
ENSG00000153721	CNKSR3	1.59291	4.43888	0.00347219	0.133737	1.YC/0.HA	Immature
ENSG00000175003	SLC22A1	-1.41834	3.22079	0.012153	0.226953	1.YC/0.HA	Immature
ENSG00000112531	QKI	1.41133	9.40688	0.00160526	0.0912308	1.YC/0.HA	Immature
ENSG00000287550	AL450345.2	3.30648	1.92399	0.000152985	0.024616	1.YC/0.HA	Immature
ENSG00000112541	PDE10A	1.92442	7.98389	0.000896298	0.0668176	1.YC/0.HA	Immature
ENSG00000223942	AL590302.1	3.19468	1.4175	0.00646127	0.17637	1.YC/0.HA	Immature
ENSG00000125337	KIF25	3.26013	1.08043	0.0136181	0.238881	1.YC/0.HA	Immature
ENSG00000225968	ELFN1	4.79251	1.69829	5.67702e-07	0.000807359	1.YC/0.HA	Immature
ENSG00000215045	GRID2IP	3.51372	1.11495	2.51367e-05	0.00903691	1.YC/0.HA	Immature
ENSG00000278254	AC004852.2	4.1876	3.8703	0.00267492	0.119744	1.YC/0.HA	Immature
ENSG00000287799	AC005014.4	-1.32316	1.71872	0.00807772	0.193698	1.YC/0.HA	Immature
ENSG00000237773	AC073332.1	-1.3833	6.42364	0.00555279	0.162437	1.YC/0.HA	Immature
ENSG00000267055	AC007001.1	5.45586	1.40626	0.00853612	0.198261	1.YC/0.HA	Immature
ENSG00000164649	CDCA7L	2.72725	1.14779	0.000527468	0.0498103	1.YC/0.HA	Immature
ENSG00000232759	AC002480.1	-2.57031	1.96719	0.0144732	0.246165	1.YC/0.HA	Immature
ENSG00000122585	NPY	4.28045	3.74731	0.00135979	0.0835208	1.YC/0.HA	Immature
ENSG00000105928	GSDME	-1.04555	4.56145	0.0104482	0.217921	1.YC/0.HA	Immature
ENSG00000287093	AC003093.1	3.20981	1.21375	0.00310383	0.128086	1.YC/0.HA	Immature
ENSG00000070882	OSBPL3	1.56994	5.85755	0.000878578	0.0663319	1.YC/0.HA	Immature
ENSG00000180347	ITPRID1	-2.58334	4.08442	0.0070028	0.180988	1.YC/0.HA	Immature
ENSG00000122545	SEPTIN7	1.10574	8.32206	0.00910398	0.20467	1.YC/0.HA	Immature
ENSG00000233854	POU6F2-AS2	2.55783	0.554823	0.0136057	0.238881	1.YC/0.HA	Immature
ENSG00000224116	INHBA-AS1	-1.8723	6.31954	0.00332889	0.131605	1.YC/0.HA	Immature
ENSG00000146674	IGFBP3	-2.0643	3.23728	9.71773e-05	0.0201867	1.YC/0.HA	Immature
ENSG00000228204	AC004830.2	2.55426	0.733151	0.00128578	0.08272	1.YC/0.HA	Immature
ENSG00000106078	COBL	1.23211	7.3578	0.0118378	0.22509	1.YC/0.HA	Immature
ENSG00000231427	LINC01445	2.84785	2.93477	0.0111077	0.222779	1.YC/0.HA	Immature
ENSG00000146648	EGFR	2.41222	4.65194	0.000221358	0.029872	1.YC/0.HA	Immature
ENSG00000127946	HIP1	1.80344	5.504	0.000288437	0.0341744	1.YC/0.HA	Immature
ENSG00000244055	AC007566.1	1.01739	5.23601	0.00537571	0.159225	1.YC/0.HA	Immature
ENSG00000242265	PEG10	-1.73429	6.29436	0.00062107	0.0546779	1.YC/0.HA	Immature
ENSG00000105852	PON3	2.70798	0.648645	0.0075831	0.186908	1.YC/0.HA	Immature
ENSG00000231764	DLX6-AS1	4.21722	4.48224	1.24947e-05	0.00623825	1.YC/0.HA	Immature
ENSG00000006128	TAC1	3.41845	3.27148	0.00168935	0.0935111	1.YC/0.HA	Immature
ENSG00000106236	NPTX2	-1.04008	5.23214	0.00307057	0.128086	1.YC/0.HA	Immature
ENSG00000166448	TMEM130	-0.881584	6.55367	0.00627005	0.173274	1.YC/0.HA	Immature
ENSG00000185955	C7orf61	2.29686	1.20341	0.0110277	0.22225	1.YC/0.HA	Immature
ENSG00000160991	ORAI2	-1.44549	5.03789	0.00337714	0.132032	1.YC/0.HA	Immature
ENSG00000161048	NAPEPLD	1.23643	6.08684	0.00115636	0.0791805	1.YC/0.HA	Immature
ENSG00000234715	AC005064.1	4.4115	0.706716	1.97014e-05	0.00780011	1.YC/0.HA	Immature
ENSG00000189056	RELN	4.6554	5.36304	8.72331e-15	8.06383e-11	1.YC/0.HA	Immature
ENSG00000187416	LHFPL3	2.79583	6.73542	0.00173839	0.0950868	1.YC/0.HA	Immature
ENSG00000164604	GPR85	-1.41705	5.00174	0.00036925	0.03969	1.YC/0.HA	Immature
ENSG00000214194	SMIM30	-1.2421	3.4025	0.0116995	0.224766	1.YC/0.HA	Immature
ENSG00000106025	TSPAN12	3.58364	1.2342	0.000243431	0.0318795	1.YC/0.HA	Immature
ENSG00000241345	AC004690.2	2.25892	2.68819	0.00104211	0.0733266	1.YC/0.HA	Immature
ENSG00000224940	PRRT4	2.63531	0.519374	0.00741846	0.18397	1.YC/0.HA	Immature
ENSG00000225144	AC018643.1	-2.10126	2.0683	0.000494113	0.0490289	1.YC/0.HA	Immature
ENSG00000223436	AC011625.1	-1.50025	2.26913	0.00412336	0.142721	1.YC/0.HA	Immature
ENSG00000181072	CHRM2	2.55066	4.22896	0.00124889	0.0821688	1.YC/0.HA	Immature
ENSG00000064393	HIPK2	0.999419	6.5152	0.00676585	0.178696	1.YC/0.HA	Immature
ENSG00000261115	TMEM178B	1.42162	8.24854	0.00781275	0.190055	1.YC/0.HA	Immature
ENSG00000242258	LINC00996	4.00744	1.16871	0.000565173	0.0517273	1.YC/0.HA	Immature
ENSG00000285861	AC026991.2	-1.58016	2.09837	0.00693349	0.180988	1.YC/0.HA	Immature
ENSG00000185053	SGCZ	1.99885	8.10128	0.00116408	0.0793854	1.YC/0.HA	Immature
ENSG00000253671	AC027117.1	4.10452	0.471734	0.00142595	0.0847682	1.YC/0.HA	Immature
ENSG00000104760	FGL1	4.16536	1.22756	0.00021207	0.0290189	1.YC/0.HA	Immature
ENSG00000173530	TNFRSF10D	2.15331	0.971149	0.0140307	0.242804	1.YC/0.HA	Immature
ENSG00000120907	ADRA1A	-2.50802	9.13981	0.0010431	0.0733266	1.YC/0.HA	Immature
ENSG00000120903	CHRNA2	3.06232	0.97004	0.00393575	0.140939	1.YC/0.HA	Immature
ENSG00000168077	SCARA3	2.9378	3.03854	0.0120402	0.226308	1.YC/0.HA	Immature
ENSG00000168081	PNOC	4.43782	0.858585	0.00265865	0.119594	1.YC/0.HA	Immature
ENSG00000169499	PLEKHA2	-1.30447	6.73406	0.00277024	0.121869	1.YC/0.HA	Immature
ENSG00000253645	AC108863.2	-2.54474	2.31042	0.00654429	0.177332	1.YC/0.HA	Immature
ENSG00000029534	ANK1	3.49298	3.67377	3.08177e-05	0.00946189	1.YC/0.HA	Immature
ENSG00000147434	CHRNA6	3.08984	0.515652	0.00910785	0.20467	1.YC/0.HA	Immature
ENSG00000221869	CEBPD	-1.32096	5.87733	0.00994837	0.213637	1.YC/0.HA	Immature
ENSG00000253369	AC022034.3	1.80406	0.704881	0.0107209	0.220722	1.YC/0.HA	Immature
ENSG00000171316	CHD7	1.04107	6.09717	0.00347177	0.133737	1.YC/0.HA	Immature
ENSG00000254777	AC022182.1	2.17351	1.72312	0.00141288	0.0845061	1.YC/0.HA	Immature
ENSG00000253762	AC069133.1	3.58191	3.24637	0.00241928	0.112381	1.YC/0.HA	Immature
ENSG00000147571	CRH	5.93325	1.80886	4.39285e-05	0.0119434	1.YC/0.HA	Immature
ENSG00000165084	C8orf34	-1.74005	9.07571	0.0112697	0.22452	1.YC/0.HA	Immature
ENSG00000254337	AC083967.1	-3.73455	0.793324	0.000750227	0.0603052	1.YC/0.HA	Immature
ENSG00000104321	TRPA1	-1.91069	2.36322	0.0122979	0.228337	1.YC/0.HA	Immature
ENSG00000164764	SBSPON	-2.26079	0.895357	0.00261107	0.11774	1.YC/0.HA	Immature
ENSG00000154589	LY96	-1.37237	3.63504	0.0141747	0.243993	1.YC/0.HA	Immature
ENSG00000253661	ZFHX4-AS1	3.24704	1.77626	0.0104552	0.217921	1.YC/0.HA	Immature
ENSG00000091656	ZFHX4	1.58411	5.58112	0.000348644	0.0385972	1.YC/0.HA	Immature
ENSG00000164751	PEX2	1.24687	3.84917	0.00049827	0.0490289	1.YC/0.HA	Immature
ENSG00000249328	AC036214.1	1.3531	2.64168	0.0100281	0.213984	1.YC/0.HA	Immature
ENSG00000260317	AC009812.4	2.12955	0.491367	0.00965373	0.209592	1.YC/0.HA	Immature
ENSG00000254394	AC060765.2	2.42224	5.64984	0.0130148	0.234748	1.YC/0.HA	Immature
ENSG00000254115	AC090572.3	-2.75332	1.11267	0.00821159	0.195136	1.YC/0.HA	Immature
ENSG00000251136	AF117829.1	0.826624	6.37624	0.013573	0.238881	1.YC/0.HA	Immature
ENSG00000104327	CALB1	-1.97406	5.77322	0.000537446	0.0501834	1.YC/0.HA	Immature
ENSG00000253394	LINC00534	-1.54733	5.44771	0.00131837	0.0828092	1.YC/0.HA	Immature
ENSG00000214954	LRRC69	1.30133	2.72373	0.00420014	0.142967	1.YC/0.HA	Immature
ENSG00000104341	LAPTM4B	1.52836	3.61647	0.00087902	0.0663319	1.YC/0.HA	Immature
ENSG00000104375	STK3	1.51127	5.91193	0.00109462	0.07608	1.YC/0.HA	Immature
ENSG00000164930	FZD6	1.20071	3.41242	0.00922098	0.205101	1.YC/0.HA	Immature
ENSG00000286946	AC024996.1	-2.07353	3.51467	0.00407068	0.142266	1.YC/0.HA	Immature
ENSG00000104447	TRPS1	1.15052	7.46438	0.0103209	0.217126	1.YC/0.HA	Immature
ENSG00000182197	EXT1	1.13569	7.85729	0.000910204	0.0675817	1.YC/0.HA	Immature
ENSG00000155792	DEPTOR	1.02651	5.33941	0.00196167	0.0993628	1.YC/0.HA	Immature
ENSG00000164983	TMEM65	0.947786	5.82014	0.0127588	0.23267	1.YC/0.HA	Immature
ENSG00000170873	MTSS1	1.25582	6.25764	0.00233931	0.110895	1.YC/0.HA	Immature
ENSG00000173334	TRIB1	2.83499	0.997862	0.00175787	0.0953066	1.YC/0.HA	Immature
ENSG00000286122	AC016074.2	2.59101	1.51647	0.000553075	0.051122	1.YC/0.HA	Immature
ENSG00000153310	FAM49B	1.01882	7.53953	0.00515387	0.157236	1.YC/0.HA	Immature
ENSG00000153317	ASAP1	1.12743	7.71533	0.0104864	0.218079	1.YC/0.HA	Immature
ENSG00000104415	CCN4	-3.23617	3.02876	0.0133286	0.237417	1.YC/0.HA	Immature
ENSG00000288067	AC105180.2	1.75613	1.3438	0.011843	0.22509	1.YC/0.HA	Immature
ENSG00000254101	LINC02055	2.21349	4.98411	0.000691079	0.0576484	1.YC/0.HA	Immature
ENSG00000169427	KCNK9	1.7065	2.52894	0.00740211	0.183939	1.YC/0.HA	Immature
ENSG00000198576	ARC	2.84864	1.67503	0.0072478	0.183348	1.YC/0.HA	Immature
ENSG00000185189	NRBP2	0.953359	4.64738	0.00675362	0.178696	1.YC/0.HA	Immature
ENSG00000168263	KCNV2	-1.71947	2.36596	0.000290209	0.0341744	1.YC/0.HA	Immature
ENSG00000107249	GLIS3	0.940131	6.58163	0.00837981	0.197107	1.YC/0.HA	Immature
ENSG00000106686	SPATA6L	-1.17509	6.20954	0.00856146	0.1986	1.YC/0.HA	Immature
ENSG00000287759	AL353151.2	1.20706	2.80873	0.0110045	0.22225	1.YC/0.HA	Immature
ENSG00000120210	INSL6	-1.17402	2.21839	0.0121251	0.226754	1.YC/0.HA	Immature
ENSG00000236924	AL162411.1	2.0685	1.15344	0.0147228	0.248353	1.YC/0.HA	Immature
ENSG00000285784	AL353595.1	1.88617	0.929067	0.00850131	0.198261	1.YC/0.HA	Immature
ENSG00000164985	PSIP1	-0.763968	7.22435	0.0146062	0.24729	1.YC/0.HA	Immature
ENSG00000099810	MTAP	0.96983	4.84405	0.00733201	0.183473	1.YC/0.HA	Immature
ENSG00000234840	LINC01239	-3.87283	5.8715	0.0084888	0.198261	1.YC/0.HA	Immature
ENSG00000283982	AL445623.2	2.25651	4.84825	0.00841645	0.197466	1.YC/0.HA	Immature
ENSG00000184434	LRRC19	-1.83747	1.06664	0.00889926	0.202423	1.YC/0.HA	Immature
ENSG00000120162	MOB3B	1.42807	6.3725	0.00201066	0.101289	1.YC/0.HA	Immature
ENSG00000165272	AQP3	-4.49125	1.78642	0.000138393	0.024616	1.YC/0.HA	Immature
ENSG00000198722	UNC13B	0.901005	5.46915	0.00759886	0.186908	1.YC/0.HA	Immature
ENSG00000106714	CNTNAP3	1.4221	3.76623	0.0131273	0.234945	1.YC/0.HA	Immature
ENSG00000275390	AL353626.1	-1.70738	2.04745	0.0137655	0.240545	1.YC/0.HA	Immature
ENSG00000215126	CBWD6	-0.985516	4.76257	0.0111221	0.222779	1.YC/0.HA	Immature
ENSG00000260691	ANKRD20A1	-1.37565	3.42442	0.00141513	0.0845061	1.YC/0.HA	Immature
ENSG00000135048	CEMIP2	-1.32968	7.36362	0.0083005	0.19624	1.YC/0.HA	Immature
ENSG00000119121	TRPM6	2.69908	2.65348	7.77807e-05	0.0171192	1.YC/0.HA	Immature
ENSG00000134996	OSTF1	1.64413	4.86025	1.35563e-05	0.00628504	1.YC/0.HA	Immature
ENSG00000267559	AL158154.3	2.87769	2.20387	0.000863058	0.0661563	1.YC/0.HA	Immature
ENSG00000148053	NTRK2	1.07781	8.8836	0.00387309	0.140363	1.YC/0.HA	Immature
ENSG00000237626	AL161629.1	-3.02863	5.97962	0.00309747	0.128086	1.YC/0.HA	Immature
ENSG00000169071	ROR2	1.45218	1.87732	0.0076126	0.186908	1.YC/0.HA	Immature
ENSG00000106819	ASPN	-2.26426	3.00726	0.00147948	0.086559	1.YC/0.HA	Immature
ENSG00000288062	AL136981.3	-1.78406	1.48927	0.0044909	0.147369	1.YC/0.HA	Immature
ENSG00000081377	CDC14B	1.48305	6.49903	0.000853618	0.065964	1.YC/0.HA	Immature
ENSG00000271086	NAMA	-1.75227	2.22245	0.00697393	0.180988	1.YC/0.HA	Immature
ENSG00000234860	AL162394.1	-2.19614	2.60004	0.00429209	0.143868	1.YC/0.HA	Immature
ENSG00000148143	ZNF462	1.76391	5.53853	0.0108287	0.221553	1.YC/0.HA	Immature
ENSG00000106853	PTGR1	-1.23786	5.47792	0.00648809	0.1764	1.YC/0.HA	Immature
ENSG00000182752	PAPPA	2.22726	1.80028	0.00204287	0.102354	1.YC/0.HA	Immature
ENSG00000244757	AL137024.1	3.49286	0.684458	0.000132177	0.024616	1.YC/0.HA	Immature
ENSG00000148219	ASTN2	2.34875	7.50285	0.00430328	0.143868	1.YC/0.HA	Immature
ENSG00000106852	LHX6	3.37052	1.4527	0.00059113	0.0530955	1.YC/0.HA	Immature
ENSG00000230826	AL390774.2	-1.29104	3.26591	0.00413001	0.142721	1.YC/0.HA	Immature
ENSG00000279571	AL162426.1	-1.5882	3.49768	0.00240837	0.112381	1.YC/0.HA	Immature
ENSG00000167123	CERCAM	2.72398	4.80739	0.00144591	0.0856793	1.YC/0.HA	Immature
ENSG00000187239	FNBP1	1.45278	6.87601	3.2715e-05	0.00953786	1.YC/0.HA	Immature
ENSG00000107130	NCS1	-1.0589	6.7727	0.00064049	0.0547781	1.YC/0.HA	Immature
ENSG00000148288	GBGT1	3.86162	1.46081	5.48967e-05	0.0137153	1.YC/0.HA	Immature
ENSG00000160293	VAV2	3.13509	3.07553	0.000199436	0.0283629	1.YC/0.HA	Immature
ENSG00000165643	SOHLH1	2.96482	1.18912	0.0060546	0.169602	1.YC/0.HA	Immature
ENSG00000160360	GPSM1	1.43765	2.68776	0.00175721	0.0953066	1.YC/0.HA	Immature
ENSG00000130653	PNPLA7	-1.18938	5.71867	0.00211511	0.104557	1.YC/0.HA	Immature
ENSG00000229205	LINC00200	3.96134	1.86617	2.88872e-05	0.00920803	1.YC/0.HA	Immature
ENSG00000185736	ADARB2	2.92567	7.43765	0.000472467	0.0474727	1.YC/0.HA	Immature
ENSG00000205696	ADARB2-AS1	3.1744	1.5865	0.000576897	0.0522827	1.YC/0.HA	Immature
ENSG00000234170	LINC02645	3.6308	1.61955	0.000131655	0.024616	1.YC/0.HA	Immature
ENSG00000233321	LINC02669	-1.60499	4.38902	0.0123515	0.228367	1.YC/0.HA	Immature
ENSG00000236892	AL357833.1	-2.09	3.15789	0.00383797	0.14023	1.YC/0.HA	Immature
ENSG00000065675	PRKCQ	1.6176	3.6114	0.00963688	0.209592	1.YC/0.HA	Immature
ENSG00000232591	LINC02642	2.79446	2.30551	0.000277436	0.0333642	1.YC/0.HA	Immature
ENSG00000123243	ITIH5	2.62046	1.97416	0.00298089	0.127518	1.YC/0.HA	Immature
ENSG00000181192	DHTKD1	0.857506	4.20765	0.0119509	0.225687	1.YC/0.HA	Immature
ENSG00000235410	AL157896.1	-1.31743	2.65135	0.00287621	0.124422	1.YC/0.HA	Immature
ENSG00000152457	DCLRE1C	1.27064	3.66658	0.00615023	0.170537	1.YC/0.HA	Immature
ENSG00000165983	PTER	-2.46738	3.21393	0.000608837	0.0541162	1.YC/0.HA	Immature
ENSG00000165985	C1QL3	-2.30166	5.95741	2.86577e-05	0.00920803	1.YC/0.HA	Immature
ENSG00000107611	CUBN	-1.37103	3.96434	0.00889679	0.202423	1.YC/0.HA	Immature
ENSG00000148488	ST8SIA6	1.60104	2.07192	0.00448035	0.147369	1.YC/0.HA	Immature
ENSG00000260314	MRC1	2.02753	2.99896	6.37565e-05	0.0147341	1.YC/0.HA	Immature
ENSG00000235020	AL390783.1	-1.43376	4.76665	0.00548153	0.161117	1.YC/0.HA	Immature
ENSG00000151025	GPR158	0.862491	7.63115	0.0107669	0.221277	1.YC/0.HA	Immature
ENSG00000136750	GAD2	3.09103	4.17111	0.00018612	0.0270058	1.YC/0.HA	Immature
ENSG00000150051	MKX	2.95844	3.73077	0.00610696	0.170038	1.YC/0.HA	Immature
ENSG00000095739	BAMBI	2.51495	1.22283	0.0109331	0.221878	1.YC/0.HA	Immature
ENSG00000148498	PARD3	-2.06008	9.57829	0.00464636	0.1487	1.YC/0.HA	Immature
ENSG00000243660	ZNF487	1.20211	3.69507	0.00362892	0.136643	1.YC/0.HA	Immature
ENSG00000107562	CXCL12	-2.03862	3.02777	0.00736353	0.183473	1.YC/0.HA	Immature
ENSG00000107551	RASSF4	1.29155	4.45494	0.00799272	0.192623	1.YC/0.HA	Immature
ENSG00000170324	FRMPD2	2.00928	2.953	0.0116456	0.224654	1.YC/0.HA	Immature
ENSG00000232682	AL592430.1	-1.59281	3.52991	0.00756177	0.186652	1.YC/0.HA	Immature
ENSG00000108176	DNAJC12	-1.09592	5.20016	0.00409985	0.142721	1.YC/0.HA	Immature
ENSG00000138336	TET1	1.0788	4.19964	0.00521685	0.158219	1.YC/0.HA	Immature
ENSG00000285300	AC073176.2	-3.62774	1.39433	0.000124476	0.0239719	1.YC/0.HA	Immature
ENSG00000166348	USP54	1.24927	6.14606	0.000147386	0.024616	1.YC/0.HA	Immature
ENSG00000236467	KCNMA1-AS1	-1.03152	4.17097	0.00801692	0.192623	1.YC/0.HA	Immature
ENSG00000229458	AC010157.1	-1.86095	2.87075	0.00470212	0.149626	1.YC/0.HA	Immature
ENSG00000148600	CDHR1	1.63765	1.30813	0.0146657	0.247615	1.YC/0.HA	Immature
ENSG00000122367	LDB3	1.6612	4.18291	0.0110356	0.22225	1.YC/0.HA	Immature
ENSG00000198682	PAPSS2	2.96879	3.13198	0.000263454	0.0324079	1.YC/0.HA	Immature
ENSG00000026103	FAS	1.87374	1.77562	0.00175293	0.0953066	1.YC/0.HA	Immature
ENSG00000138193	PLCE1	1.81126	4.16036	0.00847677	0.198261	1.YC/0.HA	Immature
ENSG00000095585	BLNK	1.61491	3.47738	0.00524044	0.158309	1.YC/0.HA	Immature
ENSG00000095587	TLL2	1.44931	2.52928	0.0118462	0.22509	1.YC/0.HA	Immature
ENSG00000187122	SLIT1	-1.0861	7.79776	0.00863424	0.199537	1.YC/0.HA	Immature
ENSG00000235823	OLMALINC	1.31214	4.04224	0.00599721	0.168535	1.YC/0.HA	Immature
ENSG00000226009	KCNIP2-AS1	-1.48654	3.06966	0.00939998	0.206398	1.YC/0.HA	Immature
ENSG00000197748	CFAP43	-1.6338	5.28334	0.000973164	0.0705563	1.YC/0.HA	Immature
ENSG00000119950	MXI1	0.791807	6.25423	0.0100139	0.213984	1.YC/0.HA	Immature
ENSG00000150594	ADRA2A	2.97815	0.782646	0.00294578	0.126361	1.YC/0.HA	Immature
ENSG00000148737	TCF7L2	1.42972	5.40626	0.00487454	0.152488	1.YC/0.HA	Immature
ENSG00000169129	AFAP1L2	2.21753	3.0085	0.0032462	0.13036	1.YC/0.HA	Immature
ENSG00000229847	EMX2OS	1.47477	2.80367	0.0129128	0.233822	1.YC/0.HA	Immature
ENSG00000229272	AL157388.1	-1.86045	4.55402	0.00401311	0.141863	1.YC/0.HA	Immature
ENSG00000203805	PLPP4	2.24941	3.81655	0.000322739	0.0366912	1.YC/0.HA	Immature
ENSG00000230131	LINC02641	-1.73575	5.0688	0.00166411	0.0929996	1.YC/0.HA	Immature
ENSG00000121898	CPXM2	2.27709	1.78639	0.00432891	0.144273	1.YC/0.HA	Immature
ENSG00000235180	LINC00601	3.41128	1.10834	0.000515183	0.0494233	1.YC/0.HA	Immature
ENSG00000197177	ADGRA1	1.34676	3.70355	0.00654526	0.177332	1.YC/0.HA	Immature
ENSG00000166341	DCHS1	2.18738	1.58136	0.00163585	0.0922063	1.YC/0.HA	Immature
ENSG00000170743	SYT9	1.18491	4.91824	0.00096481	0.0705036	1.YC/0.HA	Immature
ENSG00000130413	STK33	1.46248	4.59761	0.000970611	0.0705563	1.YC/0.HA	Immature
ENSG00000166444	ST5	1.07713	5.07042	0.00657155	0.177624	1.YC/0.HA	Immature
ENSG00000184014	DENND5A	1.22064	6.1428	3.30172e-05	0.00953786	1.YC/0.HA	Immature
ENSG00000251381	LINC00958	3.85129	0.38659	0.00137612	0.0842442	1.YC/0.HA	Immature
ENSG00000262655	SPON1	-2.04635	8.29475	0.0123399	0.228367	1.YC/0.HA	Immature
ENSG00000110693	SOX6	2.81494	6.67366	0.00636449	0.174839	1.YC/0.HA	Immature
ENSG00000166689	PLEKHA7	0.885261	3.8599	0.0143243	0.245446	1.YC/0.HA	Immature
ENSG00000109881	CCDC34	-1.43907	4.83537	0.00126839	0.0822232	1.YC/0.HA	Immature
ENSG00000176697	BDNF	-2.05373	6.43364	0.00194215	0.0986442	1.YC/0.HA	Immature
ENSG00000254526	AC090791.1	-2.27219	1.01915	0.00304856	0.128086	1.YC/0.HA	Immature
ENSG00000261340	LINC01616	-1.23061	2.5858	0.00918556	0.205101	1.YC/0.HA	Immature
ENSG00000182255	KCNA4	-1.22147	4.51585	0.00579055	0.165465	1.YC/0.HA	Immature
ENSG00000281880	PAUPAR	3.41093	1.0789	3.23106e-05	0.00953786	1.YC/0.HA	Immature
ENSG00000135363	LMO2	-1.60515	4.48057	0.00423546	0.143154	1.YC/0.HA	Immature
ENSG00000110436	SLC1A2	1.19606	8.60387	0.00501997	0.15467	1.YC/0.HA	Immature
ENSG00000149090	PAMR1	1.22498	4.59994	0.00808991	0.193739	1.YC/0.HA	Immature
ENSG00000135362	PRR5L	2.38544	4.5985	0.00455507	0.147744	1.YC/0.HA	Immature
ENSG00000285751	AC021723.2	5.22237	2.45959	4.4729e-07	0.000718265	1.YC/0.HA	Immature
ENSG00000198561	CTNND1	1.08769	5.8792	0.00736207	0.183473	1.YC/0.HA	Immature
ENSG00000166959	MS4A8	-2.68718	2.12312	0.00717148	0.18313	1.YC/0.HA	Immature
ENSG00000229859	PGA3	-3.48109	1.13174	0.00867414	0.200209	1.YC/0.HA	Immature
ENSG00000255931	AP003108.1	-2.02702	2.76766	0.00952014	0.208048	1.YC/0.HA	Immature
ENSG00000134824	FADS2	1.15823	3.84887	0.0101524	0.214266	1.YC/0.HA	Immature
ENSG00000185670	ZBTB3	2.17998	0.747559	0.003705	0.137546	1.YC/0.HA	Immature
ENSG00000133316	WDR74	1.17721	3.17891	0.0123597	0.228367	1.YC/0.HA	Immature
ENSG00000068831	RASGRP2	2.14683	2.01081	0.00695519	0.180988	1.YC/0.HA	Immature
ENSG00000172638	EFEMP2	3.27706	0.538215	0.000528063	0.0498103	1.YC/0.HA	Immature
ENSG00000174791	RIN1	-1.8075	3.2738	0.000111016	0.0220696	1.YC/0.HA	Immature
ENSG00000162337	LRP5	2.09099	1.41363	0.0127681	0.23267	1.YC/0.HA	Immature
ENSG00000131620	ANO1	3.20514	1.19947	0.000104586	0.0212481	1.YC/0.HA	Immature
ENSG00000137478	FCHSD2	1.162	7.41855	0.00557164	0.162731	1.YC/0.HA	Immature
ENSG00000171631	P2RY6	2.08714	0.927996	0.00567338	0.163125	1.YC/0.HA	Immature
ENSG00000078124	ACER3	0.854654	6.47909	0.011778	0.22509	1.YC/0.HA	Immature
ENSG00000033327	GAB2	1.4501	6.94719	0.00669573	0.178579	1.YC/0.HA	Immature
ENSG00000255209	AP001978.1	2.93695	1.33808	0.00026236	0.0324079	1.YC/0.HA	Immature
ENSG00000255178	LINC02720	2.22416	1.84591	0.0128242	0.232901	1.YC/0.HA	Immature
ENSG00000255311	AP002370.2	-1.00253	5.86361	0.00802247	0.192623	1.YC/0.HA	Immature
ENSG00000174804	FZD4	1.37322	2.37593	0.00347053	0.133737	1.YC/0.HA	Immature
ENSG00000255082	GRM5-AS1	-1.23687	4.85	0.00276293	0.121869	1.YC/0.HA	Immature
ENSG00000086991	NOX4	2.41865	3.25569	0.00912975	0.204816	1.YC/0.HA	Immature
ENSG00000255429	AP003400.1	3.40638	1.48633	0.00194178	0.0986442	1.YC/0.HA	Immature
ENSG00000165325	DEUP1	-1.83459	2.11894	0.00939452	0.206398	1.YC/0.HA	Immature
ENSG00000137693	YAP1	1.9298	3.19606	0.0140392	0.242804	1.YC/0.HA	Immature
ENSG00000255501	CARD18	2.33452	1.88398	0.00934457	0.206288	1.YC/0.HA	Immature
ENSG00000110660	SLC35F2	-1.44	3.68718	0.00566645	0.163125	1.YC/0.HA	Immature
ENSG00000178202	POGLUT3	2.28192	1.37834	0.00361635	0.136447	1.YC/0.HA	Immature
ENSG00000255028	AP003049.2	-1.90839	5.05232	0.00246015	0.113424	1.YC/0.HA	Immature
ENSG00000110777	POU2AF1	3.12089	0.922237	0.00551084	0.161721	1.YC/0.HA	Immature
ENSG00000019144	PHLDB1	2.25714	4.71138	0.000443743	0.0463007	1.YC/0.HA	Immature
ENSG00000137700	SLC37A4	2.11088	1.12259	0.00565878	0.163125	1.YC/0.HA	Immature
ENSG00000154096	THY1	-0.975794	6.96123	0.0122489	0.228283	1.YC/0.HA	Immature
ENSG00000110400	NECTIN1	1.06784	4.08283	0.0139527	0.242565	1.YC/0.HA	Immature
ENSG00000184232	OAF	2.10708	2.63955	0.00375786	0.138673	1.YC/0.HA	Immature
ENSG00000109944	JHY	-0.972932	4.29722	0.0042563	0.143334	1.YC/0.HA	Immature
ENSG00000273409	LINC02712	2.96978	3.16008	0.000894875	0.0668176	1.YC/0.HA	Immature
ENSG00000254896	OPCML-IT1	2.55288	0.741021	0.00117731	0.0793854	1.YC/0.HA	Immature
ENSG00000171840	NINJ2	2.31729	3.76666	0.00231751	0.110428	1.YC/0.HA	Immature
ENSG00000285734	AC005414.1	-2.58548	1.41924	0.000176862	0.0270058	1.YC/0.HA	Immature
ENSG00000010219	DYRK4	-0.946787	4.26073	0.0112856	0.224594	1.YC/0.HA	Immature
ENSG00000159335	PTMS	-1.32242	5.85009	0.00988566	0.212766	1.YC/0.HA	Immature
ENSG00000134539	KLRD1	-1.93164	5.04831	0.00890143	0.202423	1.YC/0.HA	Immature
ENSG00000139083	ETV6	1.74285	6.06497	0.00887151	0.202423	1.YC/0.HA	Immature
ENSG00000151491	EPS8	1.38506	5.36815	0.00852639	0.198261	1.YC/0.HA	Immature
ENSG00000188991	SLC15A5	3.05651	0.71366	0.0119845	0.226092	1.YC/0.HA	Immature
ENSG00000139144	PIK3C2G	1.6557	1.76369	0.00671314	0.178579	1.YC/0.HA	Immature
ENSG00000118308	LRMP	-1.70432	6.0679	0.000457471	0.046637	1.YC/0.HA	Immature
ENSG00000152936	LMNTD1	-3.55444	4.93459	1.88289e-06	0.00193393	1.YC/0.HA	Immature
ENSG00000257599	OVCH1-AS1	-1.58184	3.39872	0.00829002	0.19624	1.YC/0.HA	Immature
ENSG00000285517	AC010198.2	1.97897	1.68476	0.00792874	0.191616	1.YC/0.HA	Immature
ENSG00000173208	ABCD2	0.947601	4.518	0.011059	0.222361	1.YC/0.HA	Immature
ENSG00000257239	AC090630.1	-1.58473	4.81539	2.54949e-05	0.00903691	1.YC/0.HA	Immature
ENSG00000173157	ADAMTS20	2.38657	1.21291	0.000185246	0.0270058	1.YC/0.HA	Immature
ENSG00000129317	PUS7L	-1.00666	6.60253	0.00877785	0.201307	1.YC/0.HA	Immature
ENSG00000079337	RAPGEF3	1.89852	2.7891	0.00922998	0.205101	1.YC/0.HA	Immature
ENSG00000185432	METTL7A	1.31452	3.8572	0.00895236	0.202584	1.YC/0.HA	Immature
ENSG00000110934	BIN2	2.58431	1.45475	0.000709996	0.0580814	1.YC/0.HA	Immature
ENSG00000286069	AC076968.2	1.93291	1.26628	0.00465262	0.1487	1.YC/0.HA	Immature
ENSG00000135424	ITGA7	-1.89021	5.49204	0.000998174	0.0715449	1.YC/0.HA	Immature
ENSG00000025423	HSD17B6	1.78186	1.56795	0.00405108	0.142266	1.YC/0.HA	Immature
ENSG00000166863	TAC3	6.27582	2.16488	2.52356e-08	7.77593e-05	1.YC/0.HA	Immature
ENSG00000258231	AC020637.1	-3.03341	5.31453	2.04909e-08	7.57672e-05	1.YC/0.HA	Immature
ENSG00000257259	LINC02388	-3.01213	4.07378	3.58327e-06	0.00322151	1.YC/0.HA	Immature
ENSG00000156076	WIF1	2.48251	3.3017	0.00014944	0.024616	1.YC/0.HA	Immature
ENSG00000155974	GRIP1	1.17059	8.231	0.00243256	0.112715	1.YC/0.HA	Immature
ENSG00000255733	IFNG-AS1	2.3009	2.2617	0.00870476	0.200416	1.YC/0.HA	Immature
ENSG00000135678	CPM	2.28856	4.40527	0.00213294	0.104877	1.YC/0.HA	Immature
ENSG00000257815	AC025159.1	-1.53483	8.16658	0.0021953	0.106695	1.YC/0.HA	Immature
ENSG00000139292	LGR5	3.04037	3.76748	0.000865958	0.0661563	1.YC/0.HA	Immature
ENSG00000257434	AC073525.1	-1.47345	3.55787	0.0018669	0.0975846	1.YC/0.HA	Immature
ENSG00000257879	AC130415.1	-3.18622	1.45543	0.00527567	0.158596	1.YC/0.HA	Immature
ENSG00000257894	AC027288.3	-0.867257	6.5491	0.014338	0.245446	1.YC/0.HA	Immature
ENSG00000177425	PAWR	2.62601	3.12787	0.00031412	0.0360711	1.YC/0.HA	Immature
ENSG00000139220	PPFIA2	-1.60041	11.3844	0.00274906	0.121869	1.YC/0.HA	Immature
ENSG00000257467	PPFIA2-AS1	-2.26795	6.90018	0.00165574	0.0929996	1.YC/0.HA	Immature
ENSG00000258162	AC069228.1	-1.98319	7.94429	0.000327114	0.0368762	1.YC/0.HA	Immature
ENSG00000257747	LINC02426	-1.94912	1.42747	0.00418786	0.142967	1.YC/0.HA	Immature
ENSG00000179104	TMTC2	1.80179	8.03407	0.0097845	0.211574	1.YC/0.HA	Immature
ENSG00000133640	LRRIQ1	-1.72341	5.7034	0.00228748	0.109562	1.YC/0.HA	Immature
ENSG00000286608	AC010201.3	1.49859	3.32711	0.0138399	0.241161	1.YC/0.HA	Immature
ENSG00000139323	POC1B	0.90586	5.59005	0.00385733	0.140363	1.YC/0.HA	Immature
ENSG00000257594	GALNT4	2.22353	1.76321	0.00188342	0.0975846	1.YC/0.HA	Immature
ENSG00000286021	LINC02822	2.55962	4.754	0.0103636	0.217237	1.YC/0.HA	Immature
ENSG00000133639	BTG1	-1.37924	5.388	0.000144117	0.024616	1.YC/0.HA	Immature
ENSG00000136014	USP44	3.45775	1.55797	0.00699976	0.180988	1.YC/0.HA	Immature
ENSG00000074527	NTN4	3.11623	3.53242	6.58077e-05	0.0150204	1.YC/0.HA	Immature
ENSG00000179520	SLC17A8	3.20151	0.526871	0.00290297	0.125105	1.YC/0.HA	Immature
ENSG00000151572	ANO4	1.07813	7.47561	0.00112398	0.077828	1.YC/0.HA	Immature
ENSG00000256870	SLC5A8	4.35709	1.82077	6.52224e-06	0.00415804	1.YC/0.HA	Immature
ENSG00000017427	IGF1	1.65595	3.95843	2.58465e-05	0.00903691	1.YC/0.HA	Immature
ENSG00000151131	C12orf45	-1.17416	5.88969	0.000937083	0.0690655	1.YC/0.HA	Immature
ENSG00000139433	GLTP	1.27318	4.18092	0.000549312	0.0510336	1.YC/0.HA	Immature
ENSG00000111249	CUX2	2.64998	5.60507	0.0102427	0.215926	1.YC/0.HA	Immature
ENSG00000089169	RPH3A	1.03246	5.95717	0.00452101	0.147415	1.YC/0.HA	Immature
ENSG00000089250	NOS1	1.18572	3.55667	0.00184205	0.0975846	1.YC/0.HA	Immature
ENSG00000275212	LINC02826	2.71644	1.2632	0.00835857	0.197107	1.YC/0.HA	Immature
ENSG00000181234	TMEM132C	2.91337	5.428	0.0109998	0.22225	1.YC/0.HA	Immature
ENSG00000187848	P2RX2	-3.96435	2.74699	0.00125762	0.0822232	1.YC/0.HA	Immature
ENSG00000196199	MPHOSPH8	-0.881122	7.18543	0.00935034	0.206288	1.YC/0.HA	Immature
ENSG00000132972	RNF17	8.16902	1.6548	9.22775e-09	4.26507e-05	1.YC/0.HA	Immature
ENSG00000132975	GPR12	-0.96967	3.64382	0.00736131	0.183473	1.YC/0.HA	Immature
ENSG00000122025	FLT3	3.28251	1.87514	0.000257135	0.0323395	1.YC/0.HA	Immature
ENSG00000133119	RFC3	-1.6011	6.36203	6.265e-05	0.0146617	1.YC/0.HA	Immature
ENSG00000225179	LINC00457	-2.29542	3.89409	0.00439619	0.146181	1.YC/0.HA	Immature
ENSG00000120693	SMAD9	-2.22737	6.12646	0.00134346	0.0830696	1.YC/0.HA	Immature
ENSG00000133110	POSTN	-3.53405	6.9799	0.00119729	0.0802009	1.YC/0.HA	Immature
ENSG00000273507	AL354809.1	1.41456	4.13797	0.000998409	0.0715449	1.YC/0.HA	Immature
ENSG00000120658	ENOX1	1.08179	8.36804	0.00152563	0.0878689	1.YC/0.HA	Immature
ENSG00000180332	KCTD4	-1.70511	4.35214	0.00341668	0.132705	1.YC/0.HA	Immature
ENSG00000102445	RUBCNL	1.49335	3.54744	0.00365857	0.136922	1.YC/0.HA	Immature
ENSG00000136144	RCBTB1	1.38054	4.31904	0.000147969	0.024616	1.YC/0.HA	Immature
ENSG00000280165	PCDH20	-1.90647	6.04142	0.0018921	0.0975846	1.YC/0.HA	Immature
ENSG00000261105	LMO7-AS1	-1.22233	3.29872	0.0148642	0.249257	1.YC/0.HA	Immature
ENSG00000136153	LMO7	-1.08076	7.72363	0.0137406	0.24045	1.YC/0.HA	Immature
ENSG00000285572	AL136441.1	-3.13286	7.0035	4.12097e-05	0.0115437	1.YC/0.HA	Immature
ENSG00000236051	MYCBP2-AS1	-1.20944	6.06971	0.006174	0.170876	1.YC/0.HA	Immature
ENSG00000139737	SLAIN1	1.12314	7.62008	0.00189654	0.0975846	1.YC/0.HA	Immature
ENSG00000287880	AL445207.1	2.37172	2.18556	0.00715709	0.183017	1.YC/0.HA	Immature
ENSG00000183098	GPC6	2.91544	7.17359	0.00745005	0.184386	1.YC/0.HA	Immature
ENSG00000238230	LINC00391	2.89369	0.750576	0.00388045	0.140363	1.YC/0.HA	Immature
ENSG00000198542	ITGBL1	-2.70569	4.19917	0.000505132	0.0494121	1.YC/0.HA	Immature
ENSG00000286312	AL157769.1	4.13679	0.618715	0.00168065	0.093309	1.YC/0.HA	Immature
ENSG00000287923	AL138701.2	1.5077	3.62428	0.0144586	0.246143	1.YC/0.HA	Immature
ENSG00000275830	AL390755.1	2.41534	2.25898	0.000703366	0.0580814	1.YC/0.HA	Immature
ENSG00000224243	SOX1-OT	1.84873	3.27408	0.0115288	0.224654	1.YC/0.HA	Immature
ENSG00000165801	ARHGEF40	1.89142	2.04401	0.0143743	0.245612	1.YC/0.HA	Immature
ENSG00000092068	SLC7A8	1.04036	4.4533	0.0113474	0.224654	1.YC/0.HA	Immature
ENSG00000092051	JPH4	-0.871237	6.17108	0.00896342	0.202587	1.YC/0.HA	Immature
ENSG00000100884	CPNE6	-1.28331	4.10351	0.0123157	0.228367	1.YC/0.HA	Immature
ENSG00000257986	LINC02306	3.01919	4.96793	0.0137471	0.24045	1.YC/0.HA	Immature
ENSG00000257636	G2E3-AS1	-1.1377	3.45979	0.0122254	0.228076	1.YC/0.HA	Immature
ENSG00000151322	NPAS3	1.45346	9.34693	0.00101725	0.0726134	1.YC/0.HA	Immature
ENSG00000183032	SLC25A21	-1.11176	4.71755	0.0126465	0.231723	1.YC/0.HA	Immature
ENSG00000259048	AL392023.2	1.38421	5.11625	2.2527e-05	0.00867665	1.YC/0.HA	Immature
ENSG00000259070	LINC00639	2.92483	5.56569	0.00492262	0.153473	1.YC/0.HA	Immature
ENSG00000258700	LINC00871	-2.55224	5.03673	0.00928267	0.205599	1.YC/0.HA	Immature
ENSG00000180998	GPR137C	0.888891	6.30008	0.00451652	0.147415	1.YC/0.HA	Immature
ENSG00000033170	FUT8	0.84364	8.26133	0.00449909	0.147369	1.YC/0.HA	Immature
ENSG00000182732	RGS6	1.74245	7.93285	0.0143303	0.245446	1.YC/0.HA	Immature
ENSG00000100767	PAPLN	2.30941	2.43983	0.00072419	0.0587229	1.YC/0.HA	Immature
ENSG00000119673	ACOT2	-1.49692	2.18141	0.011935	0.225617	1.YC/0.HA	Immature
ENSG00000259124	AC008050.1	1.64779	3.4041	0.000146379	0.024616	1.YC/0.HA	Immature
ENSG00000258569	AC007376.2	1.25292	3.13851	0.00659769	0.17807	1.YC/0.HA	Immature
ENSG00000100596	SPTLC2	1.08937	5.89551	0.00325508	0.13036	1.YC/0.HA	Immature
ENSG00000165409	TSHR	-2.07312	4.76851	0.000645913	0.0547781	1.YC/0.HA	Immature
ENSG00000165521	EML5	-1.3998	7.98522	0.0110282	0.22225	1.YC/0.HA	Immature
ENSG00000274492	AL121768.1	-2.44473	1.95886	0.00402676	0.142074	1.YC/0.HA	Immature
ENSG00000119698	PPP4R4	-1.44751	7.58653	0.0134185	0.237618	1.YC/0.HA	Immature
ENSG00000165959	CLMN	1.49752	6.15649	0.00538271	0.159225	1.YC/0.HA	Immature
ENSG00000246223	LINC01550	-1.14951	3.58609	0.00472717	0.149698	1.YC/0.HA	Immature
ENSG00000127152	BCL11B	-1.31223	7.25301	0.0045408	0.147744	1.YC/0.HA	Immature
ENSG00000156414	TDRD9	-1.74503	4.83171	0.00368891	0.137383	1.YC/0.HA	Immature
ENSG00000235160	LINC02248	-2.57842	5.96283	0.0116948	0.224766	1.YC/0.HA	Immature
ENSG00000287280	AC009878.2	-3.64367	3.96273	0.0032576	0.13036	1.YC/0.HA	Immature
ENSG00000248905	FMN1	1.60252	7.15959	0.00860757	0.19917	1.YC/0.HA	Immature
ENSG00000166068	SPRED1	0.913199	7.20257	0.00522889	0.158219	1.YC/0.HA	Immature
ENSG00000259345	AC013652.1	-1.33545	6.79288	0.00334358	0.131804	1.YC/0.HA	Immature
ENSG00000259269	AC109630.1	-2.6989	1.53607	0.00122022	0.0811491	1.YC/0.HA	Immature
ENSG00000259390	AC022196.1	-1.56443	1.99475	0.00138741	0.0843109	1.YC/0.HA	Immature
ENSG00000188467	SLC24A5	-1.45219	1.51865	0.005065	0.155551	1.YC/0.HA	Immature
ENSG00000259235	AC066612.1	-2.31159	1.7204	0.00022533	0.0301877	1.YC/0.HA	Immature
ENSG00000104047	DTWD1	-1.18822	7.31647	0.00701012	0.180988	1.YC/0.HA	Immature
ENSG00000166450	PRTG	2.39102	2.53022	0.00388104	0.140363	1.YC/0.HA	Immature
ENSG00000138587	MNS1	-1.09049	3.57204	0.0122899	0.228337	1.YC/0.HA	Immature
ENSG00000166035	LIPC	2.20026	2.263	0.000323489	0.0366912	1.YC/0.HA	Immature
ENSG00000140416	TPM1	-0.929253	6.46108	0.00800837	0.192623	1.YC/0.HA	Immature
ENSG00000103742	IGDCC4	1.92939	1.77098	0.00303204	0.128086	1.YC/0.HA	Immature
ENSG00000260773	AC055855.1	-1.7352	1.30144	0.00389476	0.140363	1.YC/0.HA	Immature
ENSG00000174444	RPL4	-1.03087	6.20139	0.00309806	0.128086	1.YC/0.HA	Immature
ENSG00000137809	ITGA11	1.81936	2.01721	0.0023908	0.112381	1.YC/0.HA	Immature
ENSG00000173548	SNX33	3.8748	0.427775	0.00267727	0.119744	1.YC/0.HA	Immature
ENSG00000259417	CTXND1	2.32668	4.07772	0.0115353	0.224654	1.YC/0.HA	Immature
ENSG00000140545	MFGE8	2.53404	2.18405	0.0081639	0.194754	1.YC/0.HA	Immature
ENSG00000273691	AC087284.1	2.2291	0.717149	0.00609805	0.170038	1.YC/0.HA	Immature
ENSG00000197299	BLM	1.92771	2.02058	0.0109096	0.221878	1.YC/0.HA	Immature
ENSG00000287950	AC009432.2	5.05612	1.87311	0.000121294	0.0236051	1.YC/0.HA	Immature
ENSG00000140470	ADAMTS17	2.96611	5.09562	0.000613818	0.0542979	1.YC/0.HA	Immature
ENSG00000005513	SOX8	2.58143	2.41757	0.00245693	0.113424	1.YC/0.HA	Immature
ENSG00000118898	PPL	-1.3953	4.05235	0.00108788	0.0758974	1.YC/0.HA	Immature
ENSG00000283221	AC007218.2	-1.57668	1.74681	0.0114907	0.224654	1.YC/0.HA	Immature
ENSG00000103274	NUBP1	-1.0231	3.54107	0.00893595	0.202461	1.YC/0.HA	Immature
ENSG00000262529	AC130650.1	-1.06863	4.20199	0.0135392	0.238848	1.YC/0.HA	Immature
ENSG00000170537	TMC7	1.20329	4.07984	0.00960248	0.209352	1.YC/0.HA	Immature
ENSG00000103319	EEF2K	1.17439	4.26053	0.00145472	0.085926	1.YC/0.HA	Immature
ENSG00000166828	SCNN1G	-3.56788	1.39356	0.00030988	0.0358067	1.YC/0.HA	Immature
ENSG00000171208	NETO2	1.81792	5.68177	1.31497e-06	0.00151945	1.YC/0.HA	Immature
ENSG00000121281	ADCY7	2.10566	2.48051	0.0105462	0.218585	1.YC/0.HA	Immature
ENSG00000140807	NKD1	3.52266	2.44259	1.28015e-05	0.00623825	1.YC/0.HA	Immature
ENSG00000285367	AC087564.1	2.38748	4.74728	0.00926314	0.205591	1.YC/0.HA	Immature
ENSG00000260850	AC007344.1	2.44789	0.905967	0.00187016	0.0975846	1.YC/0.HA	Immature
ENSG00000070729	CNGB1	-2.55987	6.78057	0.00593161	0.167425	1.YC/0.HA	Immature
ENSG00000261502	AC040174.1	-1.99556	5.31255	0.000145574	0.024616	1.YC/0.HA	Immature
ENSG00000260658	AC138305.1	-2.28781	7.05216	1.77986e-05	0.00731245	1.YC/0.HA	Immature
ENSG00000213398	LCAT	2.54206	0.451711	0.00429844	0.143868	1.YC/0.HA	Immature
ENSG00000157423	HYDIN	-1.91698	6.92453	0.00124058	0.0819137	1.YC/0.HA	Immature
ENSG00000172137	CALB2	1.88901	2.82064	0.00219876	0.106695	1.YC/0.HA	Immature
ENSG00000118557	PMFBP1	-2.39479	2.79694	0.013235	0.236643	1.YC/0.HA	Immature
ENSG00000284484	AC025287.4	-1.61176	1.36792	0.0131069	0.234945	1.YC/0.HA	Immature
ENSG00000186153	WWOX	1.00709	8.52365	0.00375489	0.138673	1.YC/0.HA	Immature
ENSG00000277954	AC092376.2	3.41975	0.817308	0.0103629	0.217237	1.YC/0.HA	Immature
ENSG00000154099	DNAAF1	-1.37874	3.7943	0.00812034	0.193965	1.YC/0.HA	Immature
ENSG00000269901	AC010531.5	-2.60326	1.43176	0.00167862	0.093309	1.YC/0.HA	Immature
ENSG00000261744	AC116552.1	2.09006	1.74361	0.00518538	0.157936	1.YC/0.HA	Immature
ENSG00000103335	PIEZO1	2.25327	1.50154	0.012045	0.226308	1.YC/0.HA	Immature
ENSG00000260528	FAM157C	2.5417	2.37847	0.000210894	0.0290189	1.YC/0.HA	Immature
ENSG00000197879	MYO1C	1.92606	1.10847	0.00471216	0.149688	1.YC/0.HA	Immature
ENSG00000286190	AC055839.2	-2.41388	1.08362	0.00248286	0.114187	1.YC/0.HA	Immature
ENSG00000141485	SLC13A5	3.63081	0.876403	0.000756907	0.0605788	1.YC/0.HA	Immature
ENSG00000167858	TEKT1	-2.07901	2.67996	0.00394122	0.140939	1.YC/0.HA	Immature
ENSG00000276231	PIK3R6	2.3809	0.5487	0.00380312	0.139373	1.YC/0.HA	Immature
ENSG00000065320	NTN1	2.37394	2.9652	5.60268e-05	0.013811	1.YC/0.HA	Immature
ENSG00000272736	AC005323.2	-3.41097	4.99522	0.00208351	0.103548	1.YC/0.HA	Immature
ENSG00000214970	AC005323.1	-3.4909	2.125	0.00151426	0.087729	1.YC/0.HA	Immature
ENSG00000007174	DNAH9	-1.59749	6.58382	0.00531451	0.158689	1.YC/0.HA	Immature
ENSG00000170425	ADORA2B	2.44451	1.16794	0.0117733	0.22509	1.YC/0.HA	Immature
ENSG00000260328	AC104024.2	-1.47859	1.96818	0.00698592	0.180988	1.YC/0.HA	Immature
ENSG00000287910	AC104024.4	-1.45635	1.93967	0.00674889	0.178696	1.YC/0.HA	Immature
ENSG00000072310	SREBF1	1.59051	3.63697	0.00117289	0.0793854	1.YC/0.HA	Immature
ENSG00000235979	AC004448.2	-1.44291	2.08431	0.0125834	0.231369	1.YC/0.HA	Immature
ENSG00000205212	CCDC144NL	-2.08653	5.1904	2.8239e-05	0.00920803	1.YC/0.HA	Immature
ENSG00000233098	CCDC144NL-AS1	-1.06549	5.11985	0.00315477	0.129325	1.YC/0.HA	Immature
ENSG00000260019	LINC01992	2.77878	1.4317	0.0053115	0.158689	1.YC/0.HA	Immature
ENSG00000184060	ADAP2	1.71801	2.79806	0.00020824	0.0290189	1.YC/0.HA	Immature
ENSG00000279762	AC005899.8	-1.54016	2.08595	0.00146501	0.0860467	1.YC/0.HA	Immature
ENSG00000092871	RFFL	1.13433	5.83747	0.00688439	0.180988	1.YC/0.HA	Immature
ENSG00000278505	C17orf78	-1.69847	1.37629	0.00318012	0.129788	1.YC/0.HA	Immature
ENSG00000171532	NEUROD2	-1.05697	4.46724	0.00742327	0.18397	1.YC/0.HA	Immature
ENSG00000126351	THRA	-1.13081	5.79031	0.00287157	0.124422	1.YC/0.HA	Immature
ENSG00000141753	IGFBP4	2.74774	0.649734	0.00739346	0.183939	1.YC/0.HA	Immature
ENSG00000089558	KCNH4	2.23519	1.73522	0.0037941	0.139373	1.YC/0.HA	Immature
ENSG00000068137	PLEKHH3	1.74494	1.51216	0.0144109	0.245783	1.YC/0.HA	Immature
ENSG00000131094	C1QL1	2.6069	1.67343	0.00837234	0.197107	1.YC/0.HA	Immature
ENSG00000180891	CUEDC1	1.55927	4.23487	0.00367085	0.137105	1.YC/0.HA	Immature
ENSG00000136451	VEZF1	1.08875	4.03675	0.0130727	0.234945	1.YC/0.HA	Immature
ENSG00000264672	SEPTIN4-AS1	1.70344	0.752131	0.0148581	0.249257	1.YC/0.HA	Immature
ENSG00000011028	MRC2	2.35095	2.03958	1.71524e-05	0.00720711	1.YC/0.HA	Immature
ENSG00000154240	CEP112	-1.81327	8.77854	0.00753782	0.186309	1.YC/0.HA	Immature
ENSG00000075429	CACNG5	2.14562	1.38511	0.0131038	0.234945	1.YC/0.HA	Immature
ENSG00000154217	PITPNC1	1.78884	6.85038	0.00406108	0.142266	1.YC/0.HA	Immature
ENSG00000108932	SLC16A6	1.55355	2.05214	0.00186448	0.0975846	1.YC/0.HA	Immature
ENSG00000267659	LINC01482	2.09084	1.38928	0.0111433	0.222963	1.YC/0.HA	Immature
ENSG00000153822	KCNJ16	2.68773	1.46439	0.0114351	0.224654	1.YC/0.HA	Immature
ENSG00000133195	SLC39A11	1.02123	6.95471	0.00425357	0.143334	1.YC/0.HA	Immature
ENSG00000246731	AC100786.1	2.65123	0.590105	0.0133088	0.237417	1.YC/0.HA	Immature
ENSG00000161509	GRIN2C	3.76354	1.84103	3.80861e-07	0.000714293	1.YC/0.HA	Immature
ENSG00000177303	CASKIN2	2.04779	0.881423	0.004331	0.144273	1.YC/0.HA	Immature
ENSG00000204282	TNRC6C-AS1	2.3983	1.40712	0.000638387	0.0547781	1.YC/0.HA	Immature
ENSG00000183077	AFMID	1.45675	3.89699	0.000179801	0.0270058	1.YC/0.HA	Immature
ENSG00000204278	TMEM235	2.58168	2.75955	0.00337953	0.132032	1.YC/0.HA	Immature
ENSG00000171246	NPTX1	-1.22635	6.90136	0.00358421	0.135511	1.YC/0.HA	Immature
ENSG00000265688	MAFG-DT	3.31604	0.632541	0.00103149	0.0733266	1.YC/0.HA	Immature
ENSG00000260563	AC132872.1	2.31175	0.925237	0.0143349	0.245446	1.YC/0.HA	Immature
ENSG00000158270	COLEC12	-1.69919	6.52421	0.0148348	0.249257	1.YC/0.HA	Immature
ENSG00000206432	TMEM200C	2.82495	2.13897	0.00527342	0.158596	1.YC/0.HA	Immature
ENSG00000173482	PTPRM	0.825777	7.14878	0.0107957	0.221277	1.YC/0.HA	Immature
ENSG00000168502	MTCL1	2.32385	5.04201	0.0121206	0.226754	1.YC/0.HA	Immature
ENSG00000265751	AC015878.1	-2.29127	2.01128	0.0110223	0.22225	1.YC/0.HA	Immature
ENSG00000141458	NPC1	1.11866	5.44676	0.0100349	0.213984	1.YC/0.HA	Immature
ENSG00000267707	AC015961.2	-1.84784	3.47538	0.000255912	0.0323395	1.YC/0.HA	Immature
ENSG00000283503	LINC01902	-1.3919	5.52549	0.0041667	0.142967	1.YC/0.HA	Immature
ENSG00000285550	AC110014.1	3.53105	2.43637	0.00138232	0.0843109	1.YC/0.HA	Immature
ENSG00000267337	LINC01478	3.16382	1.39994	0.00646173	0.17637	1.YC/0.HA	Immature
ENSG00000167306	MYO5B	-1.85728	6.47223	0.0121019	0.226754	1.YC/0.HA	Immature
ENSG00000141639	MAPK4	1.86091	5.7868	0.00546422	0.161117	1.YC/0.HA	Immature
ENSG00000227115	LINC01630	1.65618	4.76459	0.00130989	0.0828092	1.YC/0.HA	Immature
ENSG00000267476	AC104365.1	-1.13995	3.8001	0.0123645	0.228367	1.YC/0.HA	Immature
ENSG00000081913	PHLPP1	1.18202	8.00971	0.00278174	0.121869	1.YC/0.HA	Immature
ENSG00000075336	TIMM21	-0.928804	3.91983	0.0141003	0.243398	1.YC/0.HA	Immature
ENSG00000179981	TSHZ1	-1.1581	6.58588	0.0103891	0.217525	1.YC/0.HA	Immature
ENSG00000264015	AC124254.2	3.32635	2.56528	2.3479e-06	0.00228463	1.YC/0.HA	Immature
ENSG00000263146	LINC01896	2.24039	1.75729	0.00850941	0.198261	1.YC/0.HA	Immature
ENSG00000005206	SPPL2B	0.90475	3.90177	0.00965001	0.209592	1.YC/0.HA	Immature
ENSG00000176533	GNG7	0.825887	5.73273	0.00880921	0.201535	1.YC/0.HA	Immature
ENSG00000105355	PLIN3	2.41662	2.05516	0.0130844	0.234945	1.YC/0.HA	Immature
ENSG00000266983	AC011444.1	-1.78955	1.97488	0.00448724	0.147369	1.YC/0.HA	Immature
ENSG00000267262	AC011444.2	-2.87122	1.0998	0.00286978	0.124422	1.YC/0.HA	Immature
ENSG00000178531	CTXN1	-1.15865	5.8931	0.00229476	0.109627	1.YC/0.HA	Immature
ENSG00000104980	TIMM44	-0.954097	4.36277	0.0147559	0.248556	1.YC/0.HA	Immature
ENSG00000142449	FBN3	3.27762	0.554585	0.00126752	0.0822232	1.YC/0.HA	Immature
ENSG00000099785	MARCH2	1.321	3.31146	0.00319554	0.13013	1.YC/0.HA	Immature
ENSG00000105088	OLFM2	1.51333	4.46632	0.00181806	0.0971455	1.YC/0.HA	Immature
ENSG00000080573	COL5A3	2.375	4.03113	4.36759e-05	0.0119434	1.YC/0.HA	Immature
ENSG00000105376	ICAM5	-1.54418	5.03738	9.14536e-05	0.0192136	1.YC/0.HA	Immature
ENSG00000130158	DOCK6	2.22141	1.68933	0.00146607	0.0860467	1.YC/0.HA	Immature
ENSG00000105607	GCDH	1.09537	2.92656	0.0135921	0.238881	1.YC/0.HA	Immature
ENSG00000141837	CACNA1A	0.922342	7.67549	0.00791709	0.191585	1.YC/0.HA	Immature
ENSG00000074855	ANO8	1.50702	2.68724	0.00277731	0.121869	1.YC/0.HA	Immature
ENSG00000130304	SLC27A1	1.15056	4.51268	0.000301466	0.0350534	1.YC/0.HA	Immature
ENSG00000130287	NCAN	1.2682	4.28538	0.00176356	0.0953354	1.YC/0.HA	Immature
ENSG00000187664	HAPLN4	2.80623	1.7641	0.00127195	0.0822232	1.YC/0.HA	Immature
ENSG00000269067	ZNF728	3.7646	0.898306	0.000161157	0.0254656	1.YC/0.HA	Immature
ENSG00000269289	AC011503.1	-2.0615	2.09954	0.00615254	0.170537	1.YC/0.HA	Immature
ENSG00000267339	LINC00906	2.50513	0.832141	0.0115708	0.224654	1.YC/0.HA	Immature
ENSG00000198597	ZNF536	0.789	7.36582	0.00725352	0.183348	1.YC/0.HA	Immature
ENSG00000130876	SLC7A10	2.41099	0.960887	0.0136392	0.239016	1.YC/0.HA	Immature
ENSG00000153885	KCTD15	2.19089	1.73877	0.0127028	0.232524	1.YC/0.HA	Immature
ENSG00000267260	AC020928.1	-2.42062	1.35994	0.000130389	0.024616	1.YC/0.HA	Immature
ENSG00000188766	SPRED3	2.02054	2.04264	0.00422221	0.142967	1.YC/0.HA	Immature
ENSG00000079385	CEACAM1	-1.42519	2.83937	0.00534831	0.15907	1.YC/0.HA	Immature
ENSG00000105767	CADM4	1.56969	3.12821	0.00283271	0.123809	1.YC/0.HA	Immature
ENSG00000267191	AC006213.3	-1.18407	3.85607	0.0114267	0.224654	1.YC/0.HA	Immature
ENSG00000266903	AC243964.3	-1.31173	3.39503	0.0116454	0.224654	1.YC/0.HA	Immature
ENSG00000010310	GIPR	3.33598	0.608499	0.000674559	0.0569463	1.YC/0.HA	Immature
ENSG00000268810	AC007193.1	-1.67239	0.808853	0.0122901	0.228337	1.YC/0.HA	Immature
ENSG00000130529	TRPM4	1.98852	1.65929	0.00268357	0.119744	1.YC/0.HA	Immature
ENSG00000104888	SLC17A7	-1.03464	6.55422	0.00153877	0.0880765	1.YC/0.HA	Immature
ENSG00000142512	SIGLEC10	3.26399	0.536994	0.000445777	0.0463007	1.YC/0.HA	Immature
ENSG00000187474	FPR3	-2.45512	0.805142	0.000241208	0.0318533	1.YC/0.HA	Immature
ENSG00000196209	SIRPB2	2.41491	1.22857	0.00985326	0.212316	1.YC/0.HA	Immature
ENSG00000101327	PDYN	-4.55641	4.83179	0.00160868	0.0912308	1.YC/0.HA	Immature
ENSG00000088881	EBF4	1.25864	3.2417	0.00532169	0.158689	1.YC/0.HA	Immature
ENSG00000149451	ADAM33	3.08118	0.943894	0.00488704	0.152621	1.YC/0.HA	Immature
ENSG00000171873	ADRA1D	4.33424	0.680784	0.000188433	0.0270058	1.YC/0.HA	Immature
ENSG00000089199	CHGB	-1.95288	7.46168	0.00548111	0.161117	1.YC/0.HA	Immature
ENSG00000101333	PLCB4	1.35286	5.47999	0.00355685	0.135511	1.YC/0.HA	Immature
ENSG00000125869	LAMP5	-1.71346	5.22734	7.35023e-05	0.0163724	1.YC/0.HA	Immature
ENSG00000227906	SNAP25-AS1	-1.18835	7.43327	0.00696511	0.180988	1.YC/0.HA	Immature
ENSG00000101384	JAG1	-1.52315	5.4612	0.0133865	0.237515	1.YC/0.HA	Immature
ENSG00000125848	FLRT3	-1.16653	6.34856	0.0116228	0.224654	1.YC/0.HA	Immature
ENSG00000279082	LINC01727	4.64992	1.92919	3.04503e-05	0.00946189	1.YC/0.HA	Immature
ENSG00000154930	ACSS1	2.84451	3.61441	0.00338653	0.132032	1.YC/0.HA	Immature
ENSG00000100987	VSX1	2.66157	0.891526	0.00581401	0.165623	1.YC/0.HA	Immature
ENSG00000088305	DNMT3B	1.73057	1.31429	0.00942039	0.206601	1.YC/0.HA	Immature
ENSG00000166619	BLCAP	-1.15565	5.8775	0.00166502	0.0929996	1.YC/0.HA	Immature
ENSG00000053438	NNAT	-2.25976	6.24841	0.00116897	0.0793854	1.YC/0.HA	Immature
ENSG00000101438	SLC32A1	3.80385	1.47062	0.000277915	0.0333642	1.YC/0.HA	Immature
ENSG00000149596	JPH2	2.57194	0.974464	8.40673e-05	0.0180725	1.YC/0.HA	Immature
ENSG00000101096	NFATC2	1.71585	3.16277	0.0138274	0.241161	1.YC/0.HA	Immature
ENSG00000124098	FAM210B	-1.35539	4.52065	0.0140937	0.243398	1.YC/0.HA	Immature
ENSG00000124203	ZNF831	-1.40689	6.38779	0.00661381	0.178245	1.YC/0.HA	Immature
ENSG00000092758	COL9A3	2.08929	1.88656	0.00204952	0.102409	1.YC/0.HA	Immature
ENSG00000226771	AP001136.1	-2.59734	1.6021	0.0032251	0.13036	1.YC/0.HA	Immature
ENSG00000222042	AP001341.1	-1.2852	4.43689	0.0106387	0.219518	1.YC/0.HA	Immature
ENSG00000185433	LINC00158	-1.43326	5.46477	0.0127851	0.23267	1.YC/0.HA	Immature
ENSG00000156273	BACH1	1.67608	5.35564	0.00881879	0.201535	1.YC/0.HA	Immature
ENSG00000171189	GRIK1	4.02401	7.18737	8.16808e-06	0.00471911	1.YC/0.HA	Immature
ENSG00000174680	GRIK1-AS1	4.08635	0.530775	0.00256922	0.116707	1.YC/0.HA	Immature
ENSG00000166979	EVA1C	1.8293	5.11266	0.00947914	0.207643	1.YC/0.HA	Immature
ENSG00000205927	OLIG2	3.02357	2.15172	0.00770478	0.187712	1.YC/0.HA	Immature
ENSG00000286153	AP000331.1	-1.7802	3.14205	0.00590424	0.167163	1.YC/0.HA	Immature
ENSG00000233393	AP000688.2	2.63515	0.533408	0.00412381	0.142721	1.YC/0.HA	Immature
ENSG00000157554	ERG	3.03178	1.92208	0.00372721	0.138094	1.YC/0.HA	Immature
ENSG00000160179	ABCG1	1.10013	3.92875	0.0127197	0.232603	1.YC/0.HA	Immature
ENSG00000286886	AJ011931.2	-2.25487	0.73392	0.00764696	0.18736	1.YC/0.HA	Immature
ENSG00000142156	COL6A1	2.58768	3.0743	5.00307e-06	0.00355757	1.YC/0.HA	Immature
ENSG00000015475	BID	1.51002	3.5776	0.0145937	0.24729	1.YC/0.HA	Immature
ENSG00000225783	MIAT	1.41556	7.54534	0.00045627	0.046637	1.YC/0.HA	Immature
ENSG00000169184	MN1	1.90591	2.41284	0.00691313	0.180988	1.YC/0.HA	Immature
ENSG00000186998	EMID1	2.25127	3.30706	6.16887e-05	0.0146218	1.YC/0.HA	Immature
ENSG00000128242	GAL3ST1	2.27753	2.0405	0.000228887	0.0304436	1.YC/0.HA	Immature
ENSG00000185339	TCN2	2.55341	0.526388	0.00770342	0.187712	1.YC/0.HA	Immature
ENSG00000100105	PATZ1	1.20096	2.24751	0.0125786	0.231369	1.YC/0.HA	Immature
ENSG00000128254	C22orf24	-1.91252	2.92648	0.00848271	0.198261	1.YC/0.HA	Immature
ENSG00000224973	LARGE-AS1	-1.27446	3.43173	0.0125048	0.230498	1.YC/0.HA	Immature
ENSG00000100055	CYTH4	2.86666	1.25913	0.000359098	0.0392841	1.YC/0.HA	Immature
ENSG00000100146	SOX10	2.13344	2.97976	0.0131	0.234945	1.YC/0.HA	Immature
ENSG00000198792	TMEM184B	0.841141	5.16528	0.00812036	0.193965	1.YC/0.HA	Immature
ENSG00000221890	NPTXR	-1.34782	7.18637	0.000707141	0.0580814	1.YC/0.HA	Immature
ENSG00000100346	CACNA1I	-1.05881	5.01456	0.00870007	0.200416	1.YC/0.HA	Immature
ENSG00000100147	CCDC134	1.83998	1.47622	0.00725059	0.183348	1.YC/0.HA	Immature
ENSG00000234965	SHISA8	2.48796	1.43775	0.0115884	0.224654	1.YC/0.HA	Immature
ENSG00000186654	PRR5	1.52078	2.70882	0.000498563	0.0490289	1.YC/0.HA	Immature
ENSG00000169084	DHRSX	0.925293	5.48415	0.0050826	0.155575	1.YC/0.HA	Immature
ENSG00000056998	GYG2	1.42854	2.73556	0.00494401	0.153622	1.YC/0.HA	Immature
ENSG00000047648	ARHGAP6	-2.73977	7.62742	0.00149639	0.0872719	1.YC/0.HA	Immature
ENSG00000047230	CTPS2	1.36782	3.72021	0.0118855	0.225457	1.YC/0.HA	Immature
ENSG00000004848	ARX	3.47936	1.87054	0.000348399	0.0385972	1.YC/0.HA	Immature
ENSG00000242021	AC112493.1	-1.44754	1.66597	0.0129022	0.233822	1.YC/0.HA	Immature
ENSG00000069535	MAOB	-1.17916	6.5732	0.0127903	0.23267	1.YC/0.HA	Immature
ENSG00000147113	DIPK2B	2.17913	2.05214	0.0059172	0.167274	1.YC/0.HA	Immature
ENSG00000269902	AC234772.2	-1.40686	1.69591	0.0126094	0.231369	1.YC/0.HA	Immature
ENSG00000231566	LINC02595	-1.31782	5.35462	0.00331025	0.131605	1.YC/0.HA	Immature
ENSG00000126767	ELK1	-1.49081	4.56141	0.000150612	0.024616	1.YC/0.HA	Immature
ENSG00000102109	PCSK1N	-1.33703	6.98063	0.00475497	0.150017	1.YC/0.HA	Immature
ENSG00000287215	AC231759.2	-4.10136	4.98723	0.00322872	0.13036	1.YC/0.HA	Immature
ENSG00000204131	NHSL2	-1.04312	5.39635	0.00301057	0.128086	1.YC/0.HA	Immature
ENSG00000102158	MAGT1	1.06947	3.09396	0.0104211	0.217921	1.YC/0.HA	Immature
ENSG00000102271	KLHL4	1.46751	5.52897	0.00874774	0.201149	1.YC/0.HA	Immature
ENSG00000147202	DIAPH2	-1.75044	9.60521	0.0025531	0.11626	1.YC/0.HA	Immature
ENSG00000236256	DIAPH2-AS1	-2.46714	5.50778	0.000153118	0.024616	1.YC/0.HA	Immature
ENSG00000126950	TMEM35A	-1.48921	5.42281	0.00240134	0.112381	1.YC/0.HA	Immature
ENSG00000196507	TCEAL3	-0.978807	4.82053	0.00997408	0.213637	1.YC/0.HA	Immature
ENSG00000101938	CHRDL1	2.21449	2.15648	0.00352423	0.134898	1.YC/0.HA	Immature
ENSG00000175556	LONRF3	-2.05888	5.65912	0.0116266	0.224654	1.YC/0.HA	Immature
ENSG00000188706	ZDHHC9	1.02595	4.32574	0.0115329	0.224654	1.YC/0.HA	Immature
ENSG00000235189	AL034405.1	1.23516	2.8747	0.0109738	0.22225	1.YC/0.HA	Immature
ENSG00000165694	FRMD7	-4.9155	1.36987	9.86186e-05	0.0202584	1.YC/0.HA	Immature
ENSG00000076716	GPC4	-1.72453	5.59568	0.00198676	0.100358	1.YC/0.HA	Immature
ENSG00000170965	PLAC1	-1.60258	1.03266	0.00630842	0.174075	1.YC/0.HA	Immature
ENSG00000010404	IDS	-0.980311	8.20663	0.00956061	0.208685	1.YC/0.HA	Immature
ENSG00000235703	LINC00894	0.906046	6.18534	0.0115691	0.224654	1.YC/0.HA	Immature
ENSG00000198883	PNMA5	-1.62151	2.54221	0.000941395	0.0690655	1.YC/0.HA	Immature
ENSG00000184216	IRAK1	1.89395	1.64038	0.00121767	0.0811491	1.YC/0.HA	Immature
ENSG00000223944	AL353604.1	-3.38756	4.74171	1.55909e-05	0.0960816	2.MCI/0.HA	Immature
ENSG00000144366	GULP1	-4.07	5.32567	1.10895e-07	0.00205022	2.MCI/0.HA	Immature
ENSG00000249738	AC008691.1	-2.67643	6.52998	5.02274e-07	0.00464302	2.MCI/0.HA	Immature
ENSG00000116251	RPL22	-1.50065	6.13348	0.00332547	0.197969	3.AD/0.HA	Immature
ENSG00000142676	RPL11	-2.39327	5.88885	4.88366e-05	0.0182183	3.AD/0.HA	Immature
ENSG00000117614	SYF2	-7.70183	3.85838	0.000255783	0.0508485	3.AD/0.HA	Immature
ENSG00000117632	STMN1	-2.33425	6.04809	0.000644282	0.0816712	3.AD/0.HA	Immature
ENSG00000116329	OPRD1	1.39332	5.66294	0.00312156	0.191098	3.AD/0.HA	Immature
ENSG00000116819	TFAP2E	-7.46816	3.66329	0.000771264	0.0925917	3.AD/0.HA	Immature
ENSG00000117410	ATP6V0B	-2.0768	5.20286	0.00311342	0.191098	3.AD/0.HA	Immature
ENSG00000142937	RPS8	-1.60568	7.10072	0.00223993	0.15806	3.AD/0.HA	Immature
ENSG00000171357	LURAP1	-6.93705	3.22733	0.00519469	0.23079	3.AD/0.HA	Immature
ENSG00000142856	ITGB3BP	-1.86586	5.62955	0.000874396	0.0958142	3.AD/0.HA	Immature
ENSG00000116678	LEPR	1.58417	6.89886	0.000910549	0.097071	3.AD/0.HA	Immature
ENSG00000162643	WDR63	2.15812	5.0336	0.00295508	0.186219	3.AD/0.HA	Immature
ENSG00000055732	MCOLN3	1.80254	5.24199	0.000262824	0.0511929	3.AD/0.HA	Immature
ENSG00000122406	RPL5	-2.23777	6.6237	1.23582e-05	0.0103854	3.AD/0.HA	Immature
ENSG00000197956	S100A6	-8.29653	4.34028	0.000449528	0.0670232	3.AD/0.HA	Immature
ENSG00000143543	JTB	-2.35122	4.27379	0.00590106	0.240306	3.AD/0.HA	Immature
ENSG00000177954	RPS27	-1.92568	5.68945	0.00584372	0.239554	3.AD/0.HA	Immature
ENSG00000160712	IL6R	-7.1799	3.41702	0.00581983	0.239554	3.AD/0.HA	Immature
ENSG00000215845	TSTD1	-6.86156	3.16704	0.00572527	0.238933	3.AD/0.HA	Immature
ENSG00000081721	DUSP12	-6.84371	3.15408	0.00535255	0.233251	3.AD/0.HA	Immature
ENSG00000143153	ATP1B1	-1.18913	8.7356	0.0023314	0.162653	3.AD/0.HA	Immature
ENSG00000135842	NIBAN1	-7.69795	3.84678	0.00213657	0.154912	3.AD/0.HA	Immature
ENSG00000225811	AL354771.1	-7.70181	3.88006	0.00630138	0.24825	3.AD/0.HA	Immature
ENSG00000231871	IPO9-AS1	-3.63112	4.51941	0.000239368	0.050289	3.AD/0.HA	Immature
ENSG00000198892	SHISA4	-7.06476	3.30901	0.00572488	0.238933	3.AD/0.HA	Immature
ENSG00000134375	TIMM17A	-3.02549	4.03118	0.00335396	0.198181	3.AD/0.HA	Immature
ENSG00000066027	PPP2R5A	-7.93925	4.05513	0.000268591	0.0511929	3.AD/0.HA	Immature
ENSG00000162817	C1orf115	-2.93285	3.9355	0.0046727	0.226936	3.AD/0.HA	Immature
ENSG00000186205	MARC1	-7.42765	3.63234	0.0014144	0.126326	3.AD/0.HA	Immature
ENSG00000186063	AIDA	-2.14686	4.64976	0.00546296	0.23402	3.AD/0.HA	Immature
ENSG00000143761	ARF1	-1.70777	5.72139	0.00619263	0.246744	3.AD/0.HA	Immature
ENSG00000143774	GUK1	-2.48041	5.49787	0.000627123	0.0805843	3.AD/0.HA	Immature
ENSG00000173409	ARV1	-2.39267	4.33275	0.00521798	0.23079	3.AD/0.HA	Immature
ENSG00000173726	TOMM20	-1.5108	6.67076	0.0021062	0.154912	3.AD/0.HA	Immature
ENSG00000133019	CHRM3	-4.85127	6.86603	0.0009378	0.097071	3.AD/0.HA	Immature
ENSG00000171863	RPS7	-2.87086	5.89276	8.02612e-06	0.00927418	3.AD/0.HA	Immature
ENSG00000171094	ALK	-3.22224	4.17811	0.00156328	0.131972	3.AD/0.HA	Immature
ENSG00000235848	RMDN2-AS1	-7.72935	3.87937	0.000682962	0.0847423	3.AD/0.HA	Immature
ENSG00000143933	CALM2	-1.22533	8.45566	0.00597137	0.241045	3.AD/0.HA	Immature
ENSG00000228033	AC010967.1	-7.61617	3.7935	0.0012606	0.114808	3.AD/0.HA	Immature
ENSG00000143947	RPS27A	-2.75825	6.7041	4.17447e-06	0.00593674	3.AD/0.HA	Immature
ENSG00000231609	AC007098.1	-1.92967	5.0926	0.00386963	0.212922	3.AD/0.HA	Immature
ENSG00000286480	AC009501.3	-7.04602	3.3172	0.00373406	0.209198	3.AD/0.HA	Immature
ENSG00000143971	ETAA1	-3.0373	4.02131	0.00329373	0.197709	3.AD/0.HA	Immature
ENSG00000234653	AC079117.1	-3.13833	4.1324	0.00385588	0.212798	3.AD/0.HA	Immature
ENSG00000162951	LRRTM1	-7.22507	3.46268	0.00257448	0.173712	3.AD/0.HA	Immature
ENSG00000034510	TMSB10	-3.80019	6.86876	4.16878e-06	0.00593674	3.AD/0.HA	Immature
ENSG00000135940	COX5B	-3.15059	5.46664	6.25415e-05	0.0222359	3.AD/0.HA	Immature
ENSG00000071082	RPL31	-1.53057	6.85331	0.00116751	0.110127	3.AD/0.HA	Immature
ENSG00000144119	C1QL2	-7.12299	3.38324	0.00503169	0.23079	3.AD/0.HA	Immature
ENSG00000144120	TMEM177	-7.12631	3.38195	0.0039998	0.214158	3.AD/0.HA	Immature
ENSG00000152082	MZT2B	-1.70164	5.47864	0.00600718	0.241962	3.AD/0.HA	Immature
ENSG00000144229	THSD7B	1.13037	6.91982	0.00508465	0.23079	3.AD/0.HA	Immature
ENSG00000228655	AC079793.1	2.21974	7.8022	0.00354615	0.204879	3.AD/0.HA	Immature
ENSG00000226674	TEX41	-3.28326	4.21969	0.00219106	0.155933	3.AD/0.HA	Immature
ENSG00000241399	CD302	-6.96121	3.24318	0.00510967	0.23079	3.AD/0.HA	Immature
ENSG00000236283	AC019197.1	-1.61495	5.40233	0.00413372	0.215279	3.AD/0.HA	Immature
ENSG00000236107	SCN1A-AS1	-2.14592	5.61259	0.00409643	0.215279	3.AD/0.HA	Immature
ENSG00000064989	CALCRL	-7.58462	3.76526	0.00162577	0.134612	3.AD/0.HA	Immature
ENSG00000115415	STAT1	-2.17109	4.67234	0.0046413	0.226936	3.AD/0.HA	Immature
ENSG00000178568	ERBB4	-3.56103	7.29364	0.00333018	0.197969	3.AD/0.HA	Immature
ENSG00000197756	RPL37A	-1.41949	7.24487	0.00276271	0.179217	3.AD/0.HA	Immature
ENSG00000127824	TUBA4A	-3.86732	4.69964	0.000255232	0.0508485	3.AD/0.HA	Immature
ENSG00000236451	AC067956.1	-2.45698	5.60401	0.00354165	0.204879	3.AD/0.HA	Immature
ENSG00000123977	DAW1	1.86502	5.22475	0.000239212	0.050289	3.AD/0.HA	Immature
ENSG00000153820	SPHKAP	1.49963	9.56512	0.00163824	0.134612	3.AD/0.HA	Immature
ENSG00000132326	PER2	-7.07567	3.34162	0.00372761	0.209198	3.AD/0.HA	Immature
ENSG00000172428	COPS9	-3.26137	5.03781	0.000449121	0.0670232	3.AD/0.HA	Immature
ENSG00000144713	RPL32	-3.44316	6.67999	1.91121e-07	0.000706687	3.AD/0.HA	Immature
ENSG00000131381	RBSN	-2.33159	4.29787	0.00550305	0.234966	3.AD/0.HA	Immature
ENSG00000131386	GALNT15	-7.54437	3.71735	0.00399833	0.214158	3.AD/0.HA	Immature
ENSG00000174748	RPL15	-2.30399	6.34901	0.000267447	0.0511929	3.AD/0.HA	Immature
ENSG00000114739	ACVR2B	-2.96678	3.96359	0.00513787	0.23079	3.AD/0.HA	Immature
ENSG00000168028	RPSA	-1.90194	5.65066	0.00148677	0.129049	3.AD/0.HA	Immature
ENSG00000188846	RPL14	-1.54085	6.4749	0.00213236	0.154912	3.AD/0.HA	Immature
ENSG00000162244	RPL29	-2.93255	5.70443	0.000177749	0.0402111	3.AD/0.HA	Immature
ENSG00000163689	C3orf67	-2.30572	4.7494	0.00459066	0.226854	3.AD/0.HA	Immature
ENSG00000243295	AC126121.3	1.69945	6.37713	0.00043108	0.0654964	3.AD/0.HA	Immature
ENSG00000242516	LINC00960	-3.07897	4.07751	0.00378932	0.209751	3.AD/0.HA	Immature
ENSG00000114391	RPL24	-2.4105	6.42998	2.82478e-05	0.0141147	3.AD/0.HA	Immature
ENSG00000138495	COX17	-7.21296	3.43879	0.00273145	0.178442	3.AD/0.HA	Immature
ENSG00000065518	NDUFB4	-2.18124	4.63657	0.00536195	0.233251	3.AD/0.HA	Immature
ENSG00000114125	RNF7	-7.74702	3.89511	0.000399468	0.0626785	3.AD/0.HA	Immature
ENSG00000169313	P2RY12	-7.87264	3.97633	0.000417584	0.0643358	3.AD/0.HA	Immature
ENSG00000243069	ARHGEF26-AS1	1.25237	6.18142	0.00542757	0.23402	3.AD/0.HA	Immature
ENSG00000283154	IQCJ-SCHIP1	-1.75866	8.76587	0.00422785	0.218337	3.AD/0.HA	Immature
ENSG00000008952	SEC62	-1.52683	6.87135	0.000965087	0.0985775	3.AD/0.HA	Immature
ENSG00000285051	SLC7A14-AS1	-2.01501	6.01135	0.002002	0.152946	3.AD/0.HA	Immature
ENSG00000287645	AC092939.1	-2.64317	5.0298	0.000690032	0.0847755	3.AD/0.HA	Immature
ENSG00000205981	DNAJC19	-2.11519	4.61074	0.00540586	0.23402	3.AD/0.HA	Immature
ENSG00000161203	AP2M1	-1.61796	5.67372	0.00581406	0.239554	3.AD/0.HA	Immature
ENSG00000244405	ETV5	-8.1638	4.23642	0.000326064	0.0579642	3.AD/0.HA	Immature
ENSG00000127249	ATP13A4	-3.62649	4.48658	0.00095459	0.098047	3.AD/0.HA	Immature
ENSG00000182899	RPL35A	-2.29253	6.32211	7.4282e-05	0.023678	3.AD/0.HA	Immature
ENSG00000169020	ATP5ME	-2.19192	4.64865	0.00439598	0.222057	3.AD/0.HA	Immature
ENSG00000178988	MRFAP1L1	-7.66081	3.82554	0.000400047	0.0626785	3.AD/0.HA	Immature
ENSG00000250634	LINC01182	-6.85043	3.15607	0.00565838	0.238132	3.AD/0.HA	Immature
ENSG00000249252	AC098829.1	-3.78398	4.65226	7.14038e-05	0.0231599	3.AD/0.HA	Immature
ENSG00000248837	AC097512.1	-7.8862	4.02829	0.0012512	0.114516	3.AD/0.HA	Immature
ENSG00000250137	AC093607.1	-9.47446	5.38147	2.64653e-05	0.0141147	3.AD/0.HA	Immature
ENSG00000169851	PCDH7	-1.95655	9.24827	0.0040168	0.214158	3.AD/0.HA	Immature
ENSG00000163682	RPL9	-1.69747	6.45752	0.00216179	0.154912	3.AD/0.HA	Immature
ENSG00000250930	LNX1-AS1	-3.39214	4.33679	0.000842619	0.0958142	3.AD/0.HA	Immature
ENSG00000249242	TMEM150C	-1.59304	5.38409	0.00399542	0.214158	3.AD/0.HA	Immature
ENSG00000250062	AC104827.1	-1.51222	5.4884	0.00466629	0.226936	3.AD/0.HA	Immature
ENSG00000198189	HSD17B11	-7.34194	3.55529	0.00210855	0.154912	3.AD/0.HA	Immature
ENSG00000145337	PYURF	-3.15648	4.11351	0.00239872	0.165277	3.AD/0.HA	Immature
ENSG00000177432	NAP1L5	-2.55436	4.42888	0.00449419	0.225457	3.AD/0.HA	Immature
ENSG00000164032	H2AFZ	-3.82931	4.66538	0.000339009	0.0591282	3.AD/0.HA	Immature
ENSG00000286242	AC018797.3	-2.79431	3.82285	0.00631389	0.24825	3.AD/0.HA	Immature
ENSG00000164037	SLC9B1	-7.13042	3.38411	0.00474396	0.227219	3.AD/0.HA	Immature
ENSG00000109475	RPL34	-2.24051	6.8196	3.49216e-05	0.0146337	3.AD/0.HA	Immature
ENSG00000188517	COL25A1	2.15711	9.81212	0.00169118	0.136535	3.AD/0.HA	Immature
ENSG00000250195	AC109927.1	-7.17778	3.43023	0.00398085	0.214158	3.AD/0.HA	Immature
ENSG00000249806	AC139720.1	-2.59259	5.4642	0.00376126	0.209751	3.AD/0.HA	Immature
ENSG00000145425	RPS3A	-3.35949	6.54196	1.37659e-08	0.000149057	3.AD/0.HA	Immature
ENSG00000280241	AC079298.3	-2.90661	3.91302	0.00498815	0.23079	3.AD/0.HA	Immature
ENSG00000145416	MARCH1	-2.75925	9.2582	0.00234308	0.162853	3.AD/0.HA	Immature
ENSG00000145494	NDUFS6	-2.43084	4.37695	0.00497117	0.23079	3.AD/0.HA	Immature
ENSG00000145555	MYO10	-7.20052	3.41549	0.00353783	0.204879	3.AD/0.HA	Immature
ENSG00000251294	AC091885.2	-2.12702	5.25328	0.00279263	0.179896	3.AD/0.HA	Immature
ENSG00000250453	AC008825.1	5.4787	4.12922	0.00154707	0.131972	3.AD/0.HA	Immature
ENSG00000145592	RPL37	-1.94459	6.62099	0.000226696	0.0487344	3.AD/0.HA	Immature
ENSG00000134352	IL6ST	-2.33905	5.1523	0.00155665	0.131972	3.AD/0.HA	Immature
ENSG00000049192	ADAMTS6	2.26879	6.05112	0.00483287	0.229103	3.AD/0.HA	Immature
ENSG00000273841	TAF9	-7.08767	3.33273	0.00619018	0.246744	3.AD/0.HA	Immature
ENSG00000145741	BTF3	-2.31914	5.13685	0.00142301	0.126484	3.AD/0.HA	Immature
ENSG00000145703	IQGAP2	-7.42153	3.62418	0.0025349	0.172299	3.AD/0.HA	Immature
ENSG00000186468	RPS23	-2.62225	6.53412	8.63398e-06	0.00938971	3.AD/0.HA	Immature
ENSG00000127184	COX7C	-2.75792	6.26692	1.60687e-05	0.0123783	3.AD/0.HA	Immature
ENSG00000164199	ADGRV1	-3.27924	6.31817	8.85e-05	0.0263901	3.AD/0.HA	Immature
ENSG00000237187	NR2F1-AS1	-1.49284	7.23343	0.00299721	0.187839	3.AD/0.HA	Immature
ENSG00000247121	AC009126.1	-1.83763	5.0177	0.00587984	0.240306	3.AD/0.HA	Immature
ENSG00000251293	AC008574.1	-8.0032	4.12738	0.00160567	0.133719	3.AD/0.HA	Immature
ENSG00000173926	MARCH3	-7.62038	3.78081	0.00214651	0.154912	3.AD/0.HA	Immature
ENSG00000138829	FBN2	3.80249	2.31971	0.000461881	0.0681593	3.AD/0.HA	Immature
ENSG00000169567	HINT1	-2.92105	5.9844	0.000167207	0.0391308	3.AD/0.HA	Immature
ENSG00000132570	PCBD2	-7.6513	3.81811	0.000368258	0.0620892	3.AD/0.HA	Immature
ENSG00000044115	CTNNA1	-3.33782	5.13598	9.21265e-05	0.0270355	3.AD/0.HA	Immature
ENSG00000113552	GNPDA1	-7.71843	3.87235	0.000360762	0.0620892	3.AD/0.HA	Immature
ENSG00000164587	RPS14	-2.67581	6.58386	6.81327e-05	0.0229025	3.AD/0.HA	Immature
ENSG00000241956	AC109466.1	-10.7546	6.52859	0.00348476	0.204528	3.AD/0.HA	Immature
ENSG00000253925	AC011369.1	-8.11605	4.20706	4.13819e-05	0.0160904	3.AD/0.HA	Immature
ENSG00000248222	AC011389.1	-7.30601	3.52918	0.0021103	0.154912	3.AD/0.HA	Immature
ENSG00000134516	DOCK2	-3.87826	4.73165	2.43487e-05	0.0141147	3.AD/0.HA	Immature
ENSG00000146066	HIGD2A	-7.32626	3.54051	0.00335518	0.198181	3.AD/0.HA	Immature
ENSG00000184840	TMED9	-7.06495	3.31753	0.00390334	0.214139	3.AD/0.HA	Immature
ENSG00000204628	RACK1	-2.00098	5.14943	0.00238832	0.165277	3.AD/0.HA	Immature
ENSG00000137267	TUBB2A	-2.84161	5.58134	0.000781709	0.0927439	3.AD/0.HA	Immature
ENSG00000271978	AL359643.2	3.19177	2.07204	0.0042519	0.218359	3.AD/0.HA	Immature
ENSG00000225921	NOL7	-1.96118	4.83774	0.00296129	0.186219	3.AD/0.HA	Immature
ENSG00000231500	RPS18	-4.07571	6.25596	6.12203e-08	0.00037728	3.AD/0.HA	Immature
ENSG00000225339	AL354740.1	-7.55508	3.73575	0.0011085	0.108434	3.AD/0.HA	Immature
ENSG00000124614	RPS10	-3.29228	4.23803	0.00342397	0.2016	3.AD/0.HA	Immature
ENSG00000198755	RPL10A	-1.86428	5.96642	0.00215742	0.154912	3.AD/0.HA	Immature
ENSG00000137409	MTCH1	-1.94119	5.52115	0.00165475	0.135368	3.AD/0.HA	Immature
ENSG00000214736	TOMM6	-3.27498	4.20313	0.00282182	0.181145	3.AD/0.HA	Immature
ENSG00000112576	CCND3	-2.65268	4.55513	0.00455606	0.226482	3.AD/0.HA	Immature
ENSG00000146223	RPL7L1	-2.18631	5.02219	0.000854596	0.0958142	3.AD/0.HA	Immature
ENSG00000112667	DNPH1	-7.35196	3.51869	0.00519192	0.23079	3.AD/0.HA	Immature
ENSG00000096384	HSP90AB1	-1.59651	7.7255	0.000933813	0.097071	3.AD/0.HA	Immature
ENSG00000124813	RUNX2	-2.63168	4.52553	0.00208761	0.154912	3.AD/0.HA	Immature
ENSG00000146147	MLIP	-2.32687	6.70955	0.00554393	0.235172	3.AD/0.HA	Immature
ENSG00000156508	EEF1A1	-1.40146	7.92711	0.00086243	0.0958142	3.AD/0.HA	Immature
ENSG00000196569	LAMA2	-8.68882	4.69462	1.16414e-05	0.0102488	3.AD/0.HA	Immature
ENSG00000112306	RPS12	-2.80451	6.30663	9.93153e-06	0.0102008	3.AD/0.HA	Immature
ENSG00000146411	SLC2A12	-2.92099	3.92309	0.00583595	0.239554	3.AD/0.HA	Immature
ENSG00000171408	PDE7B	-2.5729	4.46609	0.00130134	0.117937	3.AD/0.HA	Immature
ENSG00000051620	HEBP2	-7.14398	3.39592	0.0036923	0.20812	3.AD/0.HA	Immature
ENSG00000233452	STXBP5-AS1	-2.32187	4.76186	0.00359068	0.205487	3.AD/0.HA	Immature
ENSG00000112096	SOD2	-1.89978	5.29265	0.00174985	0.140049	3.AD/0.HA	Immature
ENSG00000075624	ACTB	-1.69033	6.95111	0.00267168	0.176407	3.AD/0.HA	Immature
ENSG00000189043	NDUFA4	-2.62564	6.76172	0.000142247	0.0361227	3.AD/0.HA	Immature
ENSG00000229618	AC011287.1	-3.59683	7.10875	0.0018915	0.146669	3.AD/0.HA	Immature
ENSG00000173452	TMEM196	-7.4693	3.67554	0.00352436	0.204879	3.AD/0.HA	Immature
ENSG00000196683	TOMM7	-9.20902	5.13927	1.08473e-06	0.00334242	3.AD/0.HA	Immature
ENSG00000188732	FAM221A	-7.82321	3.96116	0.000302286	0.0553332	3.AD/0.HA	Immature
ENSG00000070882	OSBPL3	1.32522	5.63663	0.00631592	0.24825	3.AD/0.HA	Immature
ENSG00000006625	GGCT	-2.13221	4.6097	0.00360114	0.205487	3.AD/0.HA	Immature
ENSG00000173852	DPY19L1	-4.08433	4.92877	0.000875844	0.0958142	3.AD/0.HA	Immature
ENSG00000002746	HECW1	-2.82964	6.54857	0.00202794	0.15429	3.AD/0.HA	Immature
ENSG00000196262	PPIA	-2.33444	6.61764	0.000617051	0.0803383	3.AD/0.HA	Immature
ENSG00000126524	SBDS	-3.93428	4.77557	3.40009e-05	0.0146337	3.AD/0.HA	Immature
ENSG00000232729	AC211433.1	-1.97162	4.85563	0.00518978	0.23079	3.AD/0.HA	Immature
ENSG00000274523	RCC1L	-7.38777	3.57377	0.00366874	0.20806	3.AD/0.HA	Immature
ENSG00000019991	HGF	-3.17654	4.13264	0.00626742	0.24825	3.AD/0.HA	Immature
ENSG00000106244	PDAP1	-3.33027	4.2662	0.00100558	0.10212	3.AD/0.HA	Immature
ENSG00000106367	AP1S1	-8.10726	4.17658	0.000550758	0.0743241	3.AD/0.HA	Immature
ENSG00000237513	AC007384.1	-7.2529	3.49073	0.00459877	0.226854	3.AD/0.HA	Immature
ENSG00000128609	NDUFA5	-1.65168	5.84728	0.00133901	0.120173	3.AD/0.HA	Immature
ENSG00000242593	AC006148.1	1.1096	8.93224	0.00412987	0.215279	3.AD/0.HA	Immature
ENSG00000128524	ATP6V1F	-2.28028	4.73309	0.00578573	0.239554	3.AD/0.HA	Immature
ENSG00000226380	AC016831.1	1.75841	4.87602	0.00214085	0.154912	3.AD/0.HA	Immature
ENSG00000105894	PTN	-8.35043	4.34779	0.00519321	0.23079	3.AD/0.HA	Immature
ENSG00000286934	AC027251.1	-3.13879	4.1138	0.00478101	0.227813	3.AD/0.HA	Immature
ENSG00000277586	NEFL	-2.1748	6.11737	0.00171098	0.137533	3.AD/0.HA	Immature
ENSG00000253457	SMIM18	-6.92645	3.21845	0.00431128	0.220584	3.AD/0.HA	Immature
ENSG00000133863	TEX15	2.43643	3.86474	0.000116109	0.0325245	3.AD/0.HA	Immature
ENSG00000181690	PLAG1	-2.95132	3.9486	0.0055164	0.234994	3.AD/0.HA	Immature
ENSG00000170791	CHCHD7	-7.05103	3.32244	0.00503971	0.23079	3.AD/0.HA	Immature
ENSG00000147604	RPL7	-2.58853	6.23821	1.39056e-05	0.0111776	3.AD/0.HA	Immature
ENSG00000254538	AC027018.1	-2.49326	4.43242	0.00452539	0.226123	3.AD/0.HA	Immature
ENSG00000104435	STMN2	-1.86758	7.13959	0.00594738	0.240602	3.AD/0.HA	Immature
ENSG00000164687	FABP5	-2.85301	4.7179	0.000504581	0.0712114	3.AD/0.HA	Immature
ENSG00000254251	AC103770.1	-7.22899	3.46584	0.00240477	0.165277	3.AD/0.HA	Immature
ENSG00000079102	RUNX1T1	-1.46619	7.10157	0.00625583	0.24825	3.AD/0.HA	Immature
ENSG00000253197	AC117834.1	-7.88068	4.00874	0.000531832	0.0728334	3.AD/0.HA	Immature
ENSG00000156467	UQCRB	-2.36757	6.31873	0.000331631	0.0583922	3.AD/0.HA	Immature
ENSG00000169439	SDC2	-2.3366	4.75022	0.00482077	0.229103	3.AD/0.HA	Immature
ENSG00000156482	RPL30	-2.24673	6.00085	0.000275058	0.0518905	3.AD/0.HA	Immature
ENSG00000104361	NIPAL2	-1.53371	5.93907	0.00525926	0.231508	3.AD/0.HA	Immature
ENSG00000164919	COX6C	-2.12575	6.18066	0.000525299	0.0728334	3.AD/0.HA	Immature
ENSG00000147669	POLR2K	-7.58508	3.74562	0.00185835	0.145818	3.AD/0.HA	Immature
ENSG00000286946	AC024996.1	-7.57308	3.76628	0.00266652	0.176407	3.AD/0.HA	Immature
ENSG00000104447	TRPS1	-2.44999	6.47619	3.49939e-05	0.0146337	3.AD/0.HA	Immature
ENSG00000253819	LINC01151	1.97344	5.94248	0.00523842	0.231141	3.AD/0.HA	Immature
ENSG00000254101	LINC02055	-7.40019	3.60731	0.00228256	0.159849	3.AD/0.HA	Immature
ENSG00000161016	RPL8	-1.94473	5.3463	0.00403111	0.214159	3.AD/0.HA	Immature
ENSG00000182307	C8orf33	-7.2855	3.50789	0.00306336	0.191098	3.AD/0.HA	Immature
ENSG00000188921	HACD4	-7.2247	3.45767	0.00411692	0.215279	3.AD/0.HA	Immature
ENSG00000099810	MTAP	-3.19977	4.17623	0.00157924	0.132714	3.AD/0.HA	Immature
ENSG00000284418	AL391117.1	-3.68168	4.56158	0.0032771	0.197352	3.AD/0.HA	Immature
ENSG00000198722	UNC13B	-1.933	4.81301	0.00377626	0.209751	3.AD/0.HA	Immature
ENSG00000136925	TSTD2	-2.09496	4.59401	0.005139	0.23079	3.AD/0.HA	Immature
ENSG00000136942	RPL35	-2.65684	5.76149	0.00105723	0.104488	3.AD/0.HA	Immature
ENSG00000136950	ARPC5L	-3.67202	4.54432	0.000385754	0.062128	3.AD/0.HA	Immature
ENSG00000197958	RPL12	-3.3348	5.12554	2.78746e-05	0.0141147	3.AD/0.HA	Immature
ENSG00000148303	RPL7A	-3.17704	6.39244	5.0256e-05	0.0182183	3.AD/0.HA	Immature
ENSG00000130558	OLFM1	-1.36718	7.63365	0.001544	0.131972	3.AD/0.HA	Immature
ENSG00000107223	EDF1	-2.97556	4.80533	0.00082517	0.0953484	3.AD/0.HA	Immature
ENSG00000176101	SSNA1	-7.16722	3.37948	0.00632442	0.24825	3.AD/0.HA	Immature
ENSG00000188229	TUBB4B	-8.35014	4.38789	0.000170698	0.0394483	3.AD/0.HA	Immature
ENSG00000185736	ADARB2	-9.37648	5.27132	0.000109735	0.0312119	3.AD/0.HA	Immature
ENSG00000165629	ATP5F1C	-1.81727	5.23804	0.00272357	0.178442	3.AD/0.HA	Immature
ENSG00000229751	AC044781.1	-7.6641	3.8269	0.000648208	0.0816712	3.AD/0.HA	Immature
ENSG00000148444	COMMD3	-2.97688	3.99136	0.00368136	0.20812	3.AD/0.HA	Immature
ENSG00000120549	KIAA1217	-4.39899	6.94157	3.56186e-05	0.0146337	3.AD/0.HA	Immature
ENSG00000197321	SVIL	-2.82249	3.84352	0.00602414	0.242118	3.AD/0.HA	Immature
ENSG00000107562	CXCL12	-7.15648	3.38687	0.00582029	0.239554	3.AD/0.HA	Immature
ENSG00000128815	WDFY4	-7.18986	3.43543	0.00283275	0.181218	3.AD/0.HA	Immature
ENSG00000122870	BICC1	1.52021	8.13891	0.000293354	0.0542352	3.AD/0.HA	Immature
ENSG00000182180	MRPS16	-2.47678	4.40566	0.002688	0.176853	3.AD/0.HA	Immature
ENSG00000172586	CHCHD1	-7.20122	3.4292	0.00543215	0.23402	3.AD/0.HA	Immature
ENSG00000236467	KCNMA1-AS1	-2.2955	4.2369	0.00401952	0.214158	3.AD/0.HA	Immature
ENSG00000138326	RPS24	-2.39559	6.7694	0.000136286	0.0360283	3.AD/0.HA	Immature
ENSG00000171314	PGAM1	-3.63472	4.53819	0.000468064	0.0681593	3.AD/0.HA	Immature
ENSG00000166136	NDUFB8	-2.07881	5.80996	0.000473628	0.0684097	3.AD/0.HA	Immature
ENSG00000173915	ATP5MD	-1.87574	5.45574	0.00181412	0.143331	3.AD/0.HA	Immature
ENSG00000203867	RBM20	1.92548	5.59439	2.71823e-05	0.0141147	3.AD/0.HA	Immature
ENSG00000285582	AC016042.1	-3.25922	5.05806	8.25008e-05	0.0254213	3.AD/0.HA	Immature
ENSG00000066468	FGFR2	-8.25905	4.27259	0.00593606	0.240602	3.AD/0.HA	Immature
ENSG00000150760	DOCK1	-8.91861	4.87508	0.000264731	0.0511929	3.AD/0.HA	Immature
ENSG00000068383	INPP5A	-2.10526	5.22696	0.000811305	0.0949329	3.AD/0.HA	Immature
ENSG00000175348	TMEM9B	-2.83508	3.85548	0.00556003	0.235226	3.AD/0.HA	Immature
ENSG00000177112	MRVI1-AS1	-6.93694	3.22736	0.00455707	0.226482	3.AD/0.HA	Immature
ENSG00000110700	RPS13	-2.04649	5.59527	0.000795352	0.0936591	3.AD/0.HA	Immature
ENSG00000187398	LUZP2	-3.76346	5.97055	1.86353e-05	0.0128626	3.AD/0.HA	Immature
ENSG00000049449	RCN1	-7.54495	3.72788	0.000649376	0.0816712	3.AD/0.HA	Immature
ENSG00000165916	PSMC3	-7.24899	3.47312	0.00441818	0.22257	3.AD/0.HA	Immature
ENSG00000167996	FTH1	-2.79147	8.05299	1.04405e-07	0.00048256	3.AD/0.HA	Immature
ENSG00000162188	GNG3	-8.03267	4.12709	0.000216994	0.0471975	3.AD/0.HA	Immature
ENSG00000176340	COX8A	-8.53988	4.56567	2.77167e-05	0.0141147	3.AD/0.HA	Immature
ENSG00000172757	CFL1	-2.41319	5.8924	0.000153342	0.0373025	3.AD/0.HA	Immature
ENSG00000174684	B4GAT1	-2.41364	4.8415	0.00364355	0.207267	3.AD/0.HA	Immature
ENSG00000084207	GSTP1	-7.86966	3.97925	0.00102432	0.102922	3.AD/0.HA	Immature
ENSG00000254604	AP002336.2	-3.26798	4.23376	0.000937712	0.097071	3.AD/0.HA	Immature
ENSG00000149273	RPS3	-2.61966	5.66019	1.87847e-05	0.0128626	3.AD/0.HA	Immature
ENSG00000151366	NDUFC2	-2.75282	5.47462	0.000251578	0.0508485	3.AD/0.HA	Immature
ENSG00000254420	AP003086.1	-7.48015	3.66961	0.00251912	0.171858	3.AD/0.HA	Immature
ENSG00000165895	ARHGAP42	-7.97274	4.08505	0.00186137	0.145818	3.AD/0.HA	Immature
ENSG00000150779	TIMM8B	-7.45866	3.63877	0.00278413	0.179896	3.AD/0.HA	Immature
ENSG00000137726	FXYD6	-4.56344	5.3146	7.28352e-06	0.00897718	3.AD/0.HA	Immature
ENSG00000118181	RPS25	-2.13223	6.41838	0.000180054	0.0402111	3.AD/0.HA	Immature
ENSG00000196655	TRAPPC4	-7.01118	3.28718	0.00291414	0.185204	3.AD/0.HA	Immature
ENSG00000149557	FEZ1	-1.76039	5.55791	0.00393045	0.214158	3.AD/0.HA	Immature
ENSG00000182934	SRPRA	-7.43909	3.63906	0.0012264	0.112806	3.AD/0.HA	Immature
ENSG00000118971	CCND2	-2.43341	4.87449	0.000608064	0.0797297	3.AD/0.HA	Immature
ENSG00000010219	DYRK4	-2.37043	4.29696	0.00320046	0.194001	3.AD/0.HA	Immature
ENSG00000111639	MRPL51	-7.72501	3.85702	0.00106252	0.104488	3.AD/0.HA	Immature
ENSG00000111640	GAPDH	-2.32336	7.06922	0.000106737	0.0308337	3.AD/0.HA	Immature
ENSG00000111674	ENO2	-2.0753	5.6395	0.00144402	0.127129	3.AD/0.HA	Immature
ENSG00000111716	LDHB	-2.02703	5.57837	0.00101082	0.10212	3.AD/0.HA	Immature
ENSG00000250166	AC053513.1	-1.59439	6.26824	0.00197557	0.151553	3.AD/0.HA	Immature
ENSG00000134532	SOX5	-2.94211	7.20835	0.00511241	0.23079	3.AD/0.HA	Immature
ENSG00000180116	C12orf40	-2.72212	5.37936	0.00638999	0.249763	3.AD/0.HA	Immature
ENSG00000050426	LETMD1	-2.286	4.22815	0.00494772	0.23079	3.AD/0.HA	Immature
ENSG00000123349	PFDN5	-2.90865	5.32061	0.00113821	0.109337	3.AD/0.HA	Immature
ENSG00000135404	CD63	-3.12581	4.93991	0.000245975	0.0505287	3.AD/0.HA	Immature
ENSG00000197728	RPS26	-2.055	5.3606	0.00308374	0.191098	3.AD/0.HA	Immature
ENSG00000229117	RPL41	-2.85686	6.69195	3.70072e-06	0.00593674	3.AD/0.HA	Immature
ENSG00000196531	NACA	-2.35468	6.01477	2.1133e-05	0.0134727	3.AD/0.HA	Immature
ENSG00000257259	LINC02388	-3.40815	4.33287	0.000907244	0.097071	3.AD/0.HA	Immature
ENSG00000257434	AC073525.1	-7.54056	3.72464	0.00152846	0.131972	3.AD/0.HA	Immature
ENSG00000180481	GLIPR1L2	-7.18981	3.43812	0.00418986	0.216981	3.AD/0.HA	Immature
ENSG00000165899	OTOGL	-8.30789	4.37734	8.43431e-05	0.0255629	3.AD/0.HA	Immature
ENSG00000111058	ACSS3	-2.57255	4.94451	0.00166497	0.135603	3.AD/0.HA	Immature
ENSG00000133639	BTG1	-1.7773	5.40597	0.00264809	0.176407	3.AD/0.HA	Immature
ENSG00000089248	ERP29	-7.59302	3.75702	0.000858216	0.0958142	3.AD/0.HA	Immature
ENSG00000089009	RPL6	-2.23192	6.46123	5.01262e-05	0.0182183	3.AD/0.HA	Immature
ENSG00000089220	PEBP1	-1.56198	7.20024	0.0022607	0.15892	3.AD/0.HA	Immature
ENSG00000089157	RPLP0	-2.65421	5.10861	0.00542786	0.23402	3.AD/0.HA	Immature
ENSG00000111775	COX6A1	-3.05794	5.48476	0.0010565	0.104488	3.AD/0.HA	Immature
ENSG00000088986	DYNLL1	-2.62852	6.71631	2.11206e-05	0.0134727	3.AD/0.HA	Immature
ENSG00000197653	DNAH10	-7.27092	3.50867	0.00489603	0.230325	3.AD/0.HA	Immature
ENSG00000150991	UBC	-2.0626	5.41842	0.00449988	0.225457	3.AD/0.HA	Immature
ENSG00000150459	SAP18	-2.98774	4.79097	0.000703585	0.0855782	3.AD/0.HA	Immature
ENSG00000173141	MRPL57	-2.09199	4.58982	0.00610004	0.244637	3.AD/0.HA	Immature
ENSG00000122026	RPL21	-2.27406	6.46981	6.62913e-05	0.0229025	3.AD/0.HA	Immature
ENSG00000139508	SLC46A3	-2.30844	4.24305	0.00628827	0.24825	3.AD/0.HA	Immature
ENSG00000183722	LHFPL6	-2.79864	5.82792	0.000144788	0.0361736	3.AD/0.HA	Immature
ENSG00000120688	WBP4	-1.75713	5.14944	0.00351399	0.204879	3.AD/0.HA	Immature
ENSG00000133112	TPT1	-1.41803	7.05577	0.00533349	0.23311	3.AD/0.HA	Immature
ENSG00000102468	HTR2A	-3.23545	4.21387	0.00518574	0.23079	3.AD/0.HA	Immature
ENSG00000139679	LPAR6	-7.60429	3.76765	0.00060733	0.0797297	3.AD/0.HA	Immature
ENSG00000228842	PCDH9-AS2	-1.96266	6.29497	0.000627658	0.0805843	3.AD/0.HA	Immature
ENSG00000236051	MYCBP2-AS1	-2.87367	5.92784	6.77938e-05	0.0229025	3.AD/0.HA	Immature
ENSG00000288016	AL162493.1	-8.06893	4.16009	0.000310851	0.0557962	3.AD/0.HA	Immature
ENSG00000179399	GPC5	-3.43812	8.02562	4.92704e-06	0.0065065	3.AD/0.HA	Immature
ENSG00000183098	GPC6	-9.09529	5.04908	0.00485901	0.229678	3.AD/0.HA	Immature
ENSG00000165410	CFL2	-2.96546	3.97964	0.00521322	0.23079	3.AD/0.HA	Immature
ENSG00000165355	FBXO33	1.31646	6.46523	0.00187695	0.146418	3.AD/0.HA	Immature
ENSG00000258394	AL442163.1	-7.14318	3.39614	0.00327569	0.197352	3.AD/0.HA	Immature
ENSG00000213741	RPS29	-1.65314	6.15636	0.00115196	0.109707	3.AD/0.HA	Immature
ENSG00000165502	RPL36AL	-2.21321	4.63348	0.00461235	0.226854	3.AD/0.HA	Immature
ENSG00000259113	AL118556.1	-6.89203	3.19354	0.00410396	0.215279	3.AD/0.HA	Immature
ENSG00000139926	FRMD6	-2.50663	5.78493	3.96606e-05	0.0159401	3.AD/0.HA	Immature
ENSG00000258667	HIF1A-AS3	-7.13543	3.39291	0.00316924	0.19274	3.AD/0.HA	Immature
ENSG00000100554	ATP6V1D	-2.1339	5.55631	0.00407198	0.215279	3.AD/0.HA	Immature
ENSG00000100632	ERH	-3.45075	4.37063	0.000498581	0.0709059	3.AD/0.HA	Immature
ENSG00000165409	TSHR	-2.08947	4.91699	0.00476181	0.227484	3.AD/0.HA	Immature
ENSG00000152315	KCNK13	-7.35179	3.5623	0.00505135	0.23079	3.AD/0.HA	Immature
ENSG00000119632	IFI27L2	-7.23556	3.44233	0.00311566	0.191098	3.AD/0.HA	Immature
ENSG00000166165	CKB	-2.56725	6.10929	0.00122641	0.112806	3.AD/0.HA	Immature
ENSG00000156411	ATP5MPL	-2.91208	5.70359	0.00036889	0.0620892	3.AD/0.HA	Immature
ENSG00000198838	RYR3	-1.75665	6.26498	0.00544509	0.23402	3.AD/0.HA	Immature
ENSG00000261684	AC018362.1	1.62029	5.79269	0.00054499	0.0740865	3.AD/0.HA	Immature
ENSG00000140264	SERF2	-2.09397	5.20169	0.00256207	0.173507	3.AD/0.HA	Immature
ENSG00000179523	EIF3J-DT	-7.09039	3.35128	0.00424316	0.218359	3.AD/0.HA	Immature
ENSG00000166710	B2M	-3.30107	5.06386	0.00219291	0.155933	3.AD/0.HA	Immature
ENSG00000185088	RPS27L	-2.78347	4.64034	0.000606843	0.0797297	3.AD/0.HA	Immature
ENSG00000259248	USP3-AS1	-3.00446	4.01279	0.00512253	0.23079	3.AD/0.HA	Immature
ENSG00000166794	PPIB	-3.04976	4.03343	0.00291566	0.185204	3.AD/0.HA	Immature
ENSG00000137818	RPLP1	-1.84214	7.06019	0.000374061	0.0620892	3.AD/0.HA	Immature
ENSG00000261460	AC009690.2	-7.40352	3.61491	0.0020371	0.154352	3.AD/0.HA	Immature
ENSG00000140395	WDR61	-1.60674	5.04535	0.00637217	0.249595	3.AD/0.HA	Immature
ENSG00000103811	CTSH	-7.0004	3.27369	0.0053058	0.233002	3.AD/0.HA	Immature
ENSG00000273540	AGBL1	-4.12154	4.96096	0.00554602	0.235172	3.AD/0.HA	Immature
ENSG00000247809	NR2F2-AS1	-3.91786	4.75686	0.000842971	0.0958142	3.AD/0.HA	Immature
ENSG00000140988	RPS2	-2.49966	5.79468	0.000128706	0.0349929	3.AD/0.HA	Immature
ENSG00000103197	TSC2	-2.97611	3.97207	0.0041186	0.215279	3.AD/0.HA	Immature
ENSG00000185883	ATP6V0C	-3.19282	6.33608	3.23465e-06	0.00593674	3.AD/0.HA	Immature
ENSG00000103145	HCFC1R1	-7.13637	3.38933	0.00472163	0.226936	3.AD/0.HA	Immature
ENSG00000103274	NUBP1	-7.4428	3.64316	0.00147136	0.128314	3.AD/0.HA	Immature
ENSG00000103460	TOX3	-2.34012	5.58544	0.00503916	0.23079	3.AD/0.HA	Immature
ENSG00000246379	AC040168.1	-1.98379	5.85688	0.000374594	0.0620892	3.AD/0.HA	Immature
ENSG00000087250	MT3	-2.94014	6.32061	1.15811e-05	0.0102488	3.AD/0.HA	Immature
ENSG00000102974	CTCF	-2.04738	4.89247	0.00220315	0.156061	3.AD/0.HA	Immature
ENSG00000103047	TANGO6	1.27146	5.88848	0.0057381	0.238933	3.AD/0.HA	Immature
ENSG00000034713	GABARAPL2	-4.68139	5.43323	1.52525e-06	0.0040284	3.AD/0.HA	Immature
ENSG00000166848	TERF2IP	-1.23862	6.9703	0.00461365	0.226854	3.AD/0.HA	Immature
ENSG00000131143	COX4I1	-2.10036	6.03141	0.00121706	0.112806	3.AD/0.HA	Immature
ENSG00000167526	RPL13	-2.2102	6.90934	0.000399623	0.0626785	3.AD/0.HA	Immature
ENSG00000258947	TUBB3	-2.67159	4.53193	0.00159271	0.13324	3.AD/0.HA	Immature
ENSG00000142507	PSMB6	-7.92041	4.02785	0.000468208	0.0681593	3.AD/0.HA	Immature
ENSG00000129197	RPAIN	-1.70413	5.10795	0.004346	0.220738	3.AD/0.HA	Immature
ENSG00000179314	WSCD1	-8.06485	4.16747	0.000521297	0.0728334	3.AD/0.HA	Immature
ENSG00000219200	RNASEK	-3.34078	5.70964	0.000386452	0.062128	3.AD/0.HA	Immature
ENSG00000170296	GABARAP	-3.03477	5.34758	0.000127564	0.0349929	3.AD/0.HA	Immature
ENSG00000220205	VAMP2	-1.71019	7.00029	0.000376135	0.0620892	3.AD/0.HA	Immature
ENSG00000161970	RPL26	-3.33589	6.68609	1.61247e-08	0.000149057	3.AD/0.HA	Immature
ENSG00000170315	UBB	-2.19218	5.95196	0.00132395	0.119401	3.AD/0.HA	Immature
ENSG00000198242	RPL23A	-2.72878	5.97478	3.79781e-06	0.00593674	3.AD/0.HA	Immature
ENSG00000125691	RPL23	-3.22775	5.97049	2.53825e-05	0.0141147	3.AD/0.HA	Immature
ENSG00000108298	RPL19	-2.07914	6.32582	0.000527947	0.0728334	3.AD/0.HA	Immature
ENSG00000131469	RPL27	-3.03405	5.35292	8.16786e-05	0.0254213	3.AD/0.HA	Immature
ENSG00000228696	ARL17B	2.55395	5.32223	0.00332716	0.197969	3.AD/0.HA	Immature
ENSG00000238083	LRRC37A2	1.55034	5.49988	0.00566652	0.238132	3.AD/0.HA	Immature
ENSG00000159199	ATP5MC1	-2.63726	5.01691	0.00206618	0.154912	3.AD/0.HA	Immature
ENSG00000121073	SLC35B1	-6.992	3.27531	0.0047258	0.226936	3.AD/0.HA	Immature
ENSG00000285939	AC034268.2	-1.90372	6.23549	0.00215553	0.154912	3.AD/0.HA	Immature
ENSG00000133193	FAM104A	-2.43313	4.38188	0.00471067	0.226936	3.AD/0.HA	Immature
ENSG00000172809	RPL38	-2.36918	6.198	0.00015663	0.0376075	3.AD/0.HA	Immature
ENSG00000125445	MRPS7	-6.79819	3.11788	0.00616649	0.246744	3.AD/0.HA	Immature
ENSG00000224877	NDUFAF8	-7.84973	3.98258	0.000180523	0.0402111	3.AD/0.HA	Immature
ENSG00000184009	ACTG1	-2.91121	5.90408	3.27834e-05	0.0146337	3.AD/0.HA	Immature
ENSG00000158270	COLEC12	1.66196	7.76433	0.000242384	0.0503505	3.AD/0.HA	Immature
ENSG00000231824	AKAIN1	1.48682	5.8885	0.00315442	0.192471	3.AD/0.HA	Immature
ENSG00000101638	ST8SIA5	-2.41494	5.20345	0.00113342	0.109337	3.AD/0.HA	Immature
ENSG00000177576	C18orf32	-3.98215	4.81739	3.3212e-05	0.0146337	3.AD/0.HA	Immature
ENSG00000265681	RPL17	-1.82517	6.53994	0.00215991	0.154912	3.AD/0.HA	Immature
ENSG00000141639	MAPK4	-3.62781	4.53049	0.00104688	0.104488	3.AD/0.HA	Immature
ENSG00000141668	CBLN2	1.68896	7.8087	0.00506384	0.23079	3.AD/0.HA	Immature
ENSG00000263655	AC090125.1	-7.14801	3.4116	0.00569349	0.238687	3.AD/0.HA	Immature
ENSG00000070423	RNF126	-6.9407	3.23079	0.00471187	0.226936	3.AD/0.HA	Immature
ENSG00000167468	GPX4	-3.09834	5.40055	0.000142631	0.0361227	3.AD/0.HA	Immature
ENSG00000099624	ATP5F1D	-4.091	4.91392	0.00013836	0.0360283	3.AD/0.HA	Immature
ENSG00000099622	CIRBP	-2.30093	5.69226	0.000874898	0.0958142	3.AD/0.HA	Immature
ENSG00000115268	RPS15	-2.31977	6.44522	0.00016672	0.0391308	3.AD/0.HA	Immature
ENSG00000127540	UQCR11	-2.61014	4.9943	0.000939837	0.097071	3.AD/0.HA	Immature
ENSG00000174917	MICOS13	-3.05411	4.01758	0.00546824	0.23402	3.AD/0.HA	Immature
ENSG00000174886	NDUFA11	-2.70425	4.579	0.0059242	0.240602	3.AD/0.HA	Immature
ENSG00000181029	TRAPPC5	-2.62557	4.50888	0.00359091	0.205487	3.AD/0.HA	Immature
ENSG00000198258	UBL5	-2.6674	5.02099	0.00145796	0.127748	3.AD/0.HA	Immature
ENSG00000130813	SHFL	-7.41298	3.61963	0.000667499	0.0833832	3.AD/0.HA	Immature
ENSG00000267673	FDX2	-3.09148	4.06795	0.00274532	0.178717	3.AD/0.HA	Immature
ENSG00000129355	CDKN2D	-7.76318	3.9069	0.000926143	0.097071	3.AD/0.HA	Immature
ENSG00000104979	C19orf53	-8.04425	4.13817	0.000310731	0.0557962	3.AD/0.HA	Immature
ENSG00000099797	TECR	-2.78463	4.65716	0.000927282	0.097071	3.AD/0.HA	Immature
ENSG00000105640	RPL18A	-2.28397	5.88152	0.00292512	0.185204	3.AD/0.HA	Immature
ENSG00000006015	REX1BD	-3.48239	4.41141	0.0006924	0.0847755	3.AD/0.HA	Immature
ENSG00000186010	NDUFA13	-2.39627	5.66118	0.000782564	0.0927439	3.AD/0.HA	Immature
ENSG00000197360	ZNF98	-7.47738	3.66694	0.00264232	0.176407	3.AD/0.HA	Immature
ENSG00000187135	VSTM2B	-8.18639	4.28431	0.00155923	0.131972	3.AD/0.HA	Immature
ENSG00000105185	PDCD5	-1.99748	4.87618	0.00394241	0.214158	3.AD/0.HA	Immature
ENSG00000126267	COX6B1	-2.54754	5.30078	0.000748404	0.0904346	3.AD/0.HA	Immature
ENSG00000105258	POLR2I	-3.31498	4.22838	0.00189682	0.146669	3.AD/0.HA	Immature
ENSG00000105738	SIPA1L3	1.21694	8.05145	0.00310059	0.191098	3.AD/0.HA	Immature
ENSG00000130244	FAM98C	-7.35889	3.57401	0.0011218	0.109157	3.AD/0.HA	Immature
ENSG00000105193	RPS16	-3.39661	5.69526	3.32499e-05	0.0146337	3.AD/0.HA	Immature
ENSG00000105372	RPS19	-2.16692	5.8769	0.00190397	0.146669	3.AD/0.HA	Immature
ENSG00000159871	LYPD5	-7.23063	3.49038	0.00576367	0.239458	3.AD/0.HA	Immature
ENSG00000130748	TMEM160	-2.34456	4.78276	0.00378916	0.209751	3.AD/0.HA	Immature
ENSG00000178980	SELENOW	-1.65187	6.69134	0.001686	0.136535	3.AD/0.HA	Immature
ENSG00000063180	CA11	-4.12396	4.9568	1.14386e-05	0.0102488	3.AD/0.HA	Immature
ENSG00000087086	FTL	-1.88112	6.88788	0.00092648	0.097071	3.AD/0.HA	Immature
ENSG00000142541	RPL13A	-1.66143	6.9314	0.00163679	0.134612	3.AD/0.HA	Immature
ENSG00000142534	RPS11	-1.78628	6.05772	0.00259131	0.174211	3.AD/0.HA	Immature
ENSG00000105605	CACNG7	-1.96092	4.79759	0.00436388	0.22104	3.AD/0.HA	Immature
ENSG00000170906	NDUFA3	-2.4092	4.34842	0.00400914	0.214158	3.AD/0.HA	Immature
ENSG00000108107	RPL28	-2.16622	6.8849	0.000379889	0.062128	3.AD/0.HA	Immature
ENSG00000171867	PRNP	-1.3645	6.80336	0.00503127	0.23079	3.AD/0.HA	Immature
ENSG00000088970	KIZ	-1.65406	5.79539	0.00356887	0.205487	3.AD/0.HA	Immature
ENSG00000101439	CST3	-5.39994	6.05074	0.000152979	0.0373025	3.AD/0.HA	Immature
ENSG00000101463	SYNDIG1	-1.88945	6.2357	0.000821728	0.0953484	3.AD/0.HA	Immature
ENSG00000166913	YWHAB	-1.38723	7.26811	0.00308015	0.191098	3.AD/0.HA	Immature
ENSG00000022277	RTF2	-2.10934	4.60547	0.00469536	0.226936	3.AD/0.HA	Immature
ENSG00000124172	ATP5F1E	-1.98081	5.73459	0.00513892	0.23079	3.AD/0.HA	Immature
ENSG00000171858	RPS21	-2.97894	5.67838	2.37562e-05	0.0141147	3.AD/0.HA	Immature
ENSG00000197457	STMN3	-2.93794	4.77378	0.000863674	0.0958142	3.AD/0.HA	Immature
ENSG00000222042	AP001341.1	1.61499	5.45915	0.00267053	0.176407	3.AD/0.HA	Immature
ENSG00000156273	BACH1	-3.32046	4.24856	0.00433156	0.220611	3.AD/0.HA	Immature
ENSG00000142168	SOD1	-2.31466	5.82392	0.00114139	0.109337	3.AD/0.HA	Immature
ENSG00000160307	S100B	-8.25936	4.27868	0.00589649	0.240306	3.AD/0.HA	Immature
ENSG00000160310	PRMT2	-1.64356	5.25976	0.00468607	0.226936	3.AD/0.HA	Immature
ENSG00000240972	MIF	-2.21182	6.02666	0.00245503	0.168106	3.AD/0.HA	Immature
ENSG00000226471	Z93930.2	-7.32316	3.54387	0.00120688	0.112725	3.AD/0.HA	Immature
ENSG00000128245	YWHAH	-1.64004	7.4612	0.000278887	0.0520814	3.AD/0.HA	Immature
ENSG00000100234	TIMP3	-2.78653	4.67741	0.00178092	0.141921	3.AD/0.HA	Immature
ENSG00000100360	IFT27	-7.15231	3.40292	0.0043191	0.220584	3.AD/0.HA	Immature
ENSG00000100316	RPL3	-2.25693	5.99188	0.0050391	0.23079	3.AD/0.HA	Immature
ENSG00000205542	TMSB4X	-2.66255	6.6117	0.000432203	0.0654964	3.AD/0.HA	Immature
ENSG00000182287	AP1S2	-7.44232	3.63095	0.00566736	0.238132	3.AD/0.HA	Immature
ENSG00000044446	PHKA2	1.44001	5.36329	0.00399765	0.214158	3.AD/0.HA	Immature
ENSG00000165169	DYNLT3	-2.65897	4.54385	0.00418356	0.216981	3.AD/0.HA	Immature
ENSG00000182220	ATP6AP2	-1.92697	5.48564	0.00144216	0.127129	3.AD/0.HA	Immature
ENSG00000147123	NDUFB11	-7.94512	4.04877	0.000498143	0.0709059	3.AD/0.HA	Immature
ENSG00000102226	USP11	-1.51177	6.0214	0.00531978	0.233062	3.AD/0.HA	Immature
ENSG00000102109	PCSK1N	-2.53348	6.80429	1.85335e-05	0.0128626	3.AD/0.HA	Immature
ENSG00000227486	AL050309.1	-2.44079	5.21419	0.000403779	0.0627316	3.AD/0.HA	Immature
ENSG00000198034	RPS4X	-3.092	5.85442	6.96135e-05	0.0229824	3.AD/0.HA	Immature
ENSG00000102383	ZDHHC15	-3.28485	4.22999	0.00120725	0.112725	3.AD/0.HA	Immature
ENSG00000131174	COX7B	-1.86129	5.0325	0.00486985	0.229678	3.AD/0.HA	Immature
ENSG00000286523	AL022151.1	2.00173	5.5341	0.000137844	0.0360283	3.AD/0.HA	Immature
ENSG00000241343	RPL36A	-2.61209	5.38307	0.000205552	0.045241	3.AD/0.HA	Immature
ENSG00000184515	BEX5	-8.10943	4.16339	0.000605605	0.0797297	3.AD/0.HA	Immature
ENSG00000133169	BEX1	-1.74629	6.73037	0.00179307	0.142276	3.AD/0.HA	Immature
ENSG00000102409	BEX4	-2.19425	5.79238	0.000894735	0.097071	3.AD/0.HA	Immature
ENSG00000133134	BEX2	-1.67732	6.30668	0.00491946	0.23079	3.AD/0.HA	Immature
ENSG00000166681	BEX3	-3.20472	6.90462	2.65282e-06	0.00593674	3.AD/0.HA	Immature
ENSG00000198918	RPL39	-2.26876	5.4311	0.00213734	0.154912	3.AD/0.HA	Immature
ENSG00000160131	VMA21	-8.17657	4.25904	3.54767e-05	0.0146337	3.AD/0.HA	Immature
ENSG00000147403	RPL10	-2.67055	6.58611	4.17751e-05	0.0160904	3.AD/0.HA	Immature
ENSG00000071553	ATP6AP1	-3.52209	4.40851	0.00115712	0.109707	3.AD/0.HA	Immature
ENSG00000188290	HES4	-2.95079	3.57249	0.00282916	0.15059	2.MCI/1.YC	Immature
ENSG00000177133	PRDM16-DT	-2.75366	2.03835	0.00196911	0.125841	2.MCI/1.YC	Immature
ENSG00000236948	AL365255.1	-2.60893	2.63021	0.00298176	0.15661	2.MCI/1.YC	Immature
ENSG00000189337	KAZN	-1.92589	9.46169	0.000498288	0.0585382	2.MCI/1.YC	Immature
ENSG00000117602	RCAN3	-2.01361	2.62744	0.0039888	0.187646	2.MCI/1.YC	Immature
ENSG00000020129	NCDN	2.1847	7.4115	0.00431393	0.196928	2.MCI/1.YC	Immature
ENSG00000163873	GRIK3	-2.50109	5.05265	0.000169038	0.0274138	2.MCI/1.YC	Immature
ENSG00000223944	AL353604.1	-2.30727	3.62654	0.00163674	0.11286	2.MCI/1.YC	Immature
ENSG00000117016	RIMS3	-2.94746	3.8865	0.00124401	0.0969606	2.MCI/1.YC	Immature
ENSG00000117013	KCNQ4	-2.58967	2.05165	0.0050976	0.216157	2.MCI/1.YC	Immature
ENSG00000187147	RNF220	-1.88235	7.60097	0.00279664	0.15059	2.MCI/1.YC	Immature
ENSG00000132122	SPATA6	-1.70302	6.54796	0.0033227	0.167726	2.MCI/1.YC	Immature
ENSG00000132854	KANK4	-3.62185	1.76871	0.00288604	0.152449	2.MCI/1.YC	Immature
ENSG00000152760	TCTEX1D1	-2.16116	2.6699	0.00485546	0.210722	2.MCI/1.YC	Immature
ENSG00000162620	LRRIQ3	-3.05016	2.37075	0.00105695	0.0907195	2.MCI/1.YC	Immature
ENSG00000137962	ARHGAP29	-3.30931	3.87937	4.59523e-05	0.010754	2.MCI/1.YC	Immature
ENSG00000162631	NTNG1	-3.62442	6.02571	8.05168e-09	1.35327e-05	2.MCI/1.YC	Immature
ENSG00000134215	VAV3	-2.18293	4.66738	0.000478146	0.0566664	2.MCI/1.YC	Immature
ENSG00000116830	TTF2	-1.94186	3.97082	0.00178048	0.118921	2.MCI/1.YC	Immature
ENSG00000131781	FMO5	-2.33299	3.55818	0.00125355	0.0969695	2.MCI/1.YC	Immature
ENSG00000143409	MINDY1	-2.6947	1.82254	0.00453959	0.202725	2.MCI/1.YC	Immature
ENSG00000158859	ADAMTS4	-2.4426	2.41881	0.00237301	0.137985	2.MCI/1.YC	Immature
ENSG00000143248	RGS5	-1.97139	4.2687	0.00205514	0.128798	2.MCI/1.YC	Immature
ENSG00000231424	BX284613.2	-3.25172	3.89035	1.45771e-05	0.00475387	2.MCI/1.YC	Immature
ENSG00000198797	BRINP2	-1.87818	6.49609	0.0053131	0.222741	2.MCI/1.YC	Immature
ENSG00000120341	SEC16B	-2.09464	3.29392	0.00236017	0.137985	2.MCI/1.YC	Immature
ENSG00000143340	FAM163A	-5.73578	2.39717	0.000358976	0.045148	2.MCI/1.YC	Immature
ENSG00000198756	COLGALT2	-1.69503	6.29383	0.00386726	0.183328	2.MCI/1.YC	Immature
ENSG00000162670	BRINP3	-2.15952	7.47032	6.73082e-05	0.013982	2.MCI/1.YC	Immature
ENSG00000285638	AL138927.1	-4.64013	2.63036	0.000102927	0.018656	2.MCI/1.YC	Immature
ENSG00000287364	AL353709.1	-5.18581	2.64981	0.000100717	0.0186205	2.MCI/1.YC	Immature
ENSG00000184144	CNTN2	-2.15575	4.80248	0.00110482	0.0916664	2.MCI/1.YC	Immature
ENSG00000286263	AL391832.4	-2.60218	2.76967	0.00284266	0.15059	2.MCI/1.YC	Immature
ENSG00000117009	KMO	-2.57196	2.82148	0.00111063	0.0916664	2.MCI/1.YC	Immature
ENSG00000054277	OPN3	-3.61371	3.63967	4.45944e-05	0.010754	2.MCI/1.YC	Immature
ENSG00000203668	CHML	-2.47178	3.58817	0.000941115	0.0836506	2.MCI/1.YC	Immature
ENSG00000180287	PLD5	-2.60963	6.1039	2.61109e-05	0.00731421	2.MCI/1.YC	Immature
ENSG00000237667	LINC01115	4.44634	2.66656	0.00234213	0.137465	2.MCI/1.YC	Immature
ENSG00000130508	PXDN	-1.93369	3.13491	0.00456234	0.20325	2.MCI/1.YC	Immature
ENSG00000234929	AC018685.2	-1.89132	2.9163	0.00543183	0.225838	2.MCI/1.YC	Immature
ENSG00000224184	MIR3681HG	-2.55403	4.1527	0.0024147	0.138643	2.MCI/1.YC	Immature
ENSG00000071575	TRIB2	-2.66586	3.18329	0.000687755	0.0721941	2.MCI/1.YC	Immature
ENSG00000225649	AC064875.1	-3.34242	3.21881	7.4792e-05	0.0150592	2.MCI/1.YC	Immature
ENSG00000157851	DPYSL5	-2.01698	5.21933	0.000890005	0.0817243	2.MCI/1.YC	Immature
ENSG00000226994	AC079352.1	-2.16125	6.13305	0.000813112	0.0782959	2.MCI/1.YC	Immature
ENSG00000116016	EPAS1	-2.03177	3.38748	0.00246118	0.139151	2.MCI/1.YC	Immature
ENSG00000285755	AC132153.1	-3.08837	4.08124	2.56155e-05	0.00728584	2.MCI/1.YC	Immature
ENSG00000143995	MEIS1	-2.66961	4.83584	0.00147191	0.105068	2.MCI/1.YC	Immature
ENSG00000287172	AC073091.3	-5.03575	6.49306	6.42436e-06	0.00276218	2.MCI/1.YC	Immature
ENSG00000287749	AC073091.4	-3.67593	3.3067	9.65552e-05	0.0180314	2.MCI/1.YC	Immature
ENSG00000186854	TRABD2A	-2.61992	2.5813	0.00137839	0.101035	2.MCI/1.YC	Immature
ENSG00000144057	ST6GAL2	-3.00437	5.45076	6.33567e-06	0.00276218	2.MCI/1.YC	Immature
ENSG00000231538	DPP10-AS3	-2.17651	2.52191	0.00283378	0.15059	2.MCI/1.YC	Immature
ENSG00000286776	AC093610.1	-2.32772	2.36401	0.00228438	0.134725	2.MCI/1.YC	Immature
ENSG00000144230	GPR17	-3.64625	2.32435	0.000633975	0.0693546	2.MCI/1.YC	Immature
ENSG00000286778	AC013265.1	-3.96157	3.25716	3.5071e-05	0.00913229	2.MCI/1.YC	Immature
ENSG00000286225	AC079163.2	-2.77561	2.64162	0.00156752	0.10936	2.MCI/1.YC	Immature
ENSG00000231079	AC105402.3	-2.94691	5.31546	0.000231143	0.0341869	2.MCI/1.YC	Immature
ENSG00000136541	ERMN	-2.53968	4.18885	0.000804513	0.0782834	2.MCI/1.YC	Immature
ENSG00000153246	PLA2R1	-1.87955	4.07091	0.00249631	0.140279	2.MCI/1.YC	Immature
ENSG00000153250	RBMS1	-2.31734	5.69156	0.000124541	0.0219286	2.MCI/1.YC	Immature
ENSG00000078098	FAP	-2.21358	2.42683	0.00519312	0.218483	2.MCI/1.YC	Immature
ENSG00000184611	KCNH7	-2.59434	7.90838	2.88088e-06	0.00152177	2.MCI/1.YC	Immature
ENSG00000237750	AC011900.1	-2.22109	2.49979	0.00497878	0.212092	2.MCI/1.YC	Immature
ENSG00000081479	LRP2	-3.10624	4.4095	0.000474833	0.0566589	2.MCI/1.YC	Immature
ENSG00000224577	LINC01117	-2.97339	2.76817	0.000405682	0.0500017	2.MCI/1.YC	Immature
ENSG00000144331	ZNF385B	-2.08842	7.81276	0.000128344	0.0223851	2.MCI/1.YC	Immature
ENSG00000162992	NEUROD1	2.34191	4.40036	0.00353912	0.173558	2.MCI/1.YC	Immature
ENSG00000064989	CALCRL	-1.86075	3.94965	0.00256548	0.142434	2.MCI/1.YC	Immature
ENSG00000231689	LINC01090	-3.85994	4.59497	0.00215249	0.133094	2.MCI/1.YC	Immature
ENSG00000144366	GULP1	-4.62987	5.54393	6.8528e-07	0.000575884	2.MCI/1.YC	Immature
ENSG00000128641	MYO1B	-2.85955	4.26063	0.00126673	0.0975805	2.MCI/1.YC	Immature
ENSG00000225539	LINC01821	-4.78678	3.67908	1.7248e-06	0.000966304	2.MCI/1.YC	Immature
ENSG00000236653	LINC01923	-3.48008	2.40197	0.0028427	0.15059	2.MCI/1.YC	Immature
ENSG00000225421	AC019330.1	-2.89581	2.56379	0.0023966	0.138643	2.MCI/1.YC	Immature
ENSG00000163249	CCNYL1	-1.84463	4.66471	0.00166515	0.113055	2.MCI/1.YC	Immature
ENSG00000178568	ERBB4	-2.03053	9.84842	0.000876938	0.0810642	2.MCI/1.YC	Immature
ENSG00000174453	VWC2L	-3.86451	4.82937	7.76129e-07	0.000596657	2.MCI/1.YC	Immature
ENSG00000072182	ASIC4	-2.55004	2.05559	0.00519973	0.218483	2.MCI/1.YC	Immature
ENSG00000239498	AC019211.1	-2.20351	6.53604	0.00452759	0.202725	2.MCI/1.YC	Immature
ENSG00000236451	AC067956.1	-2.08502	5.95428	0.00461887	0.204781	2.MCI/1.YC	Immature
ENSG00000188011	RTP5	3.9854	3.96931	0.000274497	0.0371493	2.MCI/1.YC	Immature
ENSG00000134115	CNTN6	-1.89026	4.95201	0.00114546	0.0932723	2.MCI/1.YC	Immature
ENSG00000144619	CNTN4	-3.53239	7.81029	1.35422e-05	0.00472394	2.MCI/1.YC	Immature
ENSG00000227588	CNTN4-AS2	-3.41043	1.85577	0.00419177	0.194229	2.MCI/1.YC	Immature
ENSG00000144550	CPNE9	-2.62133	2.99026	0.00155989	0.10936	2.MCI/1.YC	Immature
ENSG00000132164	SLC6A11	-2.28701	3.87936	0.000558296	0.0621794	2.MCI/1.YC	Immature
ENSG00000157103	SLC6A1	-2.56563	5.56066	0.000132517	0.0226849	2.MCI/1.YC	Immature
ENSG00000151090	THRB	-1.79053	8.35642	0.00493281	0.211596	2.MCI/1.YC	Immature
ENSG00000224822	THRB-IT1	-3.85869	2.51006	0.000752987	0.0758615	2.MCI/1.YC	Immature
ENSG00000237838	AC092422.1	-2.53236	4.66026	0.000287291	0.0382117	2.MCI/1.YC	Immature
ENSG00000144645	OSBPL10	-2.2856	5.57924	0.00085872	0.0805889	2.MCI/1.YC	Immature
ENSG00000226320	LINC01811	-2.2249	5.21337	0.000259457	0.0363397	2.MCI/1.YC	Immature
ENSG00000168314	MOBP	-2.44438	7.01302	0.00189845	0.123153	2.MCI/1.YC	Immature
ENSG00000285885	AC092058.1	-2.50032	1.84643	0.00426625	0.195718	2.MCI/1.YC	Immature
ENSG00000168032	ENTPD3	-1.65211	4.11614	0.00512612	0.216869	2.MCI/1.YC	Immature
ENSG00000056736	IL17RB	-2.21332	2.35764	0.00329598	0.167726	2.MCI/1.YC	Immature
ENSG00000163638	ADAMTS9	-2.39844	3.46894	0.000872796	0.0810642	2.MCI/1.YC	Immature
ENSG00000240175	MAGI1-AS1	-3.77973	1.52943	0.00416526	0.193486	2.MCI/1.YC	Immature
ENSG00000163377	TAFA4	-1.98389	3.57936	0.00205081	0.128798	2.MCI/1.YC	Immature
ENSG00000121440	PDZRN3	-2.59125	7.07883	3.18014e-05	0.00852092	2.MCI/1.YC	Immature
ENSG00000239572	AC108749.1	-2.78405	2.07209	0.00402752	0.188508	2.MCI/1.YC	Immature
ENSG00000179097	HTR1F	-6.99622	1.25272	0.00420341	0.194282	2.MCI/1.YC	Immature
ENSG00000044524	EPHA3	-3.76434	5.64736	5.62794e-09	1.1561e-05	2.MCI/1.YC	Immature
ENSG00000269028	MTRNR2L12	2.59426	6.57157	0.000673495	0.0719744	2.MCI/1.YC	Immature
ENSG00000177707	NECTIN3	-2.15369	6.52776	0.000742105	0.0758615	2.MCI/1.YC	Immature
ENSG00000144824	PHLDB2	-2.78062	3.41289	0.00176791	0.118855	2.MCI/1.YC	Immature
ENSG00000004399	PLXND1	-2.89964	3.01506	0.000245625	0.0352024	2.MCI/1.YC	Immature
ENSG00000091513	TF	-1.94566	6.6768	0.00368114	0.178595	2.MCI/1.YC	Immature
ENSG00000174948	GPR149	-4.02771	3.21723	0.000174108	0.027512	2.MCI/1.YC	Immature
ENSG00000114805	PLCH1	-2.47453	5.25344	0.000776095	0.0764785	2.MCI/1.YC	Immature
ENSG00000288087	AC112770.1	-6.21966	3.49933	7.54953e-05	0.0150592	2.MCI/1.YC	Immature
ENSG00000013297	CLDN11	-2.39685	5.58027	0.00382159	0.181629	2.MCI/1.YC	Immature
ENSG00000242808	SOX2-OT	-1.66293	7.8884	0.00194247	0.125568	2.MCI/1.YC	Immature
ENSG00000002587	HS3ST1	-2.07468	3.82707	0.00165021	0.112996	2.MCI/1.YC	Immature
ENSG00000250634	LINC01182	-2.06543	3.85529	0.00195254	0.125779	2.MCI/1.YC	Immature
ENSG00000248837	AC097512.1	-3.12901	3.49708	0.000202467	0.0310547	2.MCI/1.YC	Immature
ENSG00000250137	AC093607.1	-2.66889	4.62529	0.00622022	0.244211	2.MCI/1.YC	Immature
ENSG00000250723	AC016687.2	-3.62747	4.17725	0.000264711	0.0365222	2.MCI/1.YC	Immature
ENSG00000168421	RHOH	-3.33312	1.19954	0.00633209	0.245878	2.MCI/1.YC	Immature
ENSG00000163285	GABRG1	-1.60564	4.2143	0.00491469	0.211596	2.MCI/1.YC	Immature
ENSG00000074966	TXK	-3.27313	2.61106	0.00115397	0.0932723	2.MCI/1.YC	Immature
ENSG00000134853	PDGFRA	-3.75575	4.25074	0.00137694	0.101035	2.MCI/1.YC	Immature
ENSG00000134851	TMEM165	-1.73301	7.43496	0.0027626	0.15059	2.MCI/1.YC	Immature
ENSG00000138759	FRAS1	-3.00457	6.542	3.08932e-06	0.00158654	2.MCI/1.YC	Immature
ENSG00000118777	ABCG2	-3.67228	2.15374	0.00119432	0.0939599	2.MCI/1.YC	Immature
ENSG00000138722	MMRN1	-2.27788	2.1568	0.00612748	0.243623	2.MCI/1.YC	Immature
ENSG00000138795	LEF1	-2.9126	1.80337	0.00589058	0.236919	2.MCI/1.YC	Immature
ENSG00000138792	ENPEP	-3.96694	1.67257	0.00428353	0.196024	2.MCI/1.YC	Immature
ENSG00000180801	ARSJ	-4.19644	3.46465	0.000684348	0.0721941	2.MCI/1.YC	Immature
ENSG00000174607	UGT8	-2.21135	6.05334	0.00425686	0.195718	2.MCI/1.YC	Immature
ENSG00000228358	LINC02263	-6.98282	4.62564	1.17829e-07	0.000115155	2.MCI/1.YC	Immature
ENSG00000236922	LINC01378	-3.94557	5.59116	1.07256e-07	0.000115155	2.MCI/1.YC	Immature
ENSG00000173376	NDNF	-2.31336	1.72046	0.00611364	0.243597	2.MCI/1.YC	Immature
ENSG00000186867	QRFPR	-4.73475	1.59161	0.0055624	0.228022	2.MCI/1.YC	Immature
ENSG00000138741	TRPC3	-2.96644	3.37487	0.000357061	0.045148	2.MCI/1.YC	Immature
ENSG00000248869	LINC02511	-7.43237	1.57087	0.000848692	0.0804647	2.MCI/1.YC	Immature
ENSG00000286771	AC097658.3	-3.19316	1.49438	0.00639606	0.246869	2.MCI/1.YC	Immature
ENSG00000151617	EDNRA	-2.83522	2.26524	0.00279506	0.15059	2.MCI/1.YC	Immature
ENSG00000109686	SH3D19	-1.70026	6.69352	0.00352935	0.173558	2.MCI/1.YC	Immature
ENSG00000164142	FAM160A1	-2.6989	2.51814	0.00141074	0.102281	2.MCI/1.YC	Immature
ENSG00000197410	DCHS2	-1.78728	4.08986	0.00256367	0.142434	2.MCI/1.YC	Immature
ENSG00000251244	AC107208.1	-2.94117	1.7784	0.00584794	0.236063	2.MCI/1.YC	Immature
ENSG00000164124	TMEM144	-1.92891	7.31571	0.00484355	0.2107	2.MCI/1.YC	Immature
ENSG00000171509	RXFP1	-5.18348	4.99398	8.84776e-10	2.33682e-06	2.MCI/1.YC	Immature
ENSG00000168843	FSTL5	-3.12705	6.81892	5.87329e-05	0.0127747	2.MCI/1.YC	Immature
ENSG00000248431	AC021134.1	-3.35387	2.87459	0.000173805	0.027512	2.MCI/1.YC	Immature
ENSG00000109576	AADAT	-1.80031	3.27188	0.00566727	0.230278	2.MCI/1.YC	Immature
ENSG00000174473	GALNTL6	-3.9309	7.86726	1.67832e-10	1.03429e-06	2.MCI/1.YC	Immature
ENSG00000249378	LINC01060	3.06301	2.86272	0.00443682	0.201049	2.MCI/1.YC	Immature
ENSG00000183654	MARCH11	-1.98625	5.02032	0.00112631	0.0921383	2.MCI/1.YC	Immature
ENSG00000248455	LINC02217	-3.4855	4.31788	3.21711e-06	0.00160751	2.MCI/1.YC	Immature
ENSG00000154162	CDH12	-1.9773	8.5113	0.00241198	0.138643	2.MCI/1.YC	Immature
ENSG00000287176	AC099517.1	-6.77556	3.2734	7.30768e-06	0.00290743	2.MCI/1.YC	Immature
ENSG00000113361	CDH6	-3.58808	4.29688	6.66765e-05	0.013982	2.MCI/1.YC	Immature
ENSG00000133401	PDZD2	-1.54354	7.75263	0.00457486	0.203317	2.MCI/1.YC	Immature
ENSG00000182836	PLCXD3	-2.87078	4.80855	1.44833e-05	0.00475387	2.MCI/1.YC	Immature
ENSG00000112964	GHR	-1.88026	5.76788	0.0014585	0.104921	2.MCI/1.YC	Immature
ENSG00000070193	FGF10	-7.29188	1.47534	0.00108045	0.0916304	2.MCI/1.YC	Immature
ENSG00000164512	ANKRD55	-2.53417	3.87504	0.000536367	0.0608365	2.MCI/1.YC	Immature
ENSG00000249436	AC008780.1	-2.4712	2.93831	0.00138261	0.101035	2.MCI/1.YC	Immature
ENSG00000248529	AC026746.1	-3.26312	1.54578	0.00369804	0.178595	2.MCI/1.YC	Immature
ENSG00000122012	SV2C	-3.49901	4.18206	0.00222339	0.134725	2.MCI/1.YC	Immature
ENSG00000145681	HAPLN1	-2.57937	2.37775	0.00225223	0.134725	2.MCI/1.YC	Immature
ENSG00000081189	MEF2C	-1.62036	8.49975	0.00301834	0.157636	2.MCI/1.YC	Immature
ENSG00000250049	AC114316.1	-3.11983	2.31281	0.000947502	0.0838154	2.MCI/1.YC	Immature
ENSG00000237187	NR2F1-AS1	-1.82854	7.31518	0.000933366	0.0833627	2.MCI/1.YC	Immature
ENSG00000251027	LINC01950	-5.09647	2.57504	0.000153433	0.0253274	2.MCI/1.YC	Immature
ENSG00000184349	EFNA5	-3.36155	7.5898	6.80824e-08	8.39138e-05	2.MCI/1.YC	Immature
ENSG00000112893	MAN2A1	-2.25267	8.29758	8.08242e-05	0.0158966	2.MCI/1.YC	Immature
ENSG00000164403	SHROOM1	-2.24716	2.2187	0.00452528	0.202725	2.MCI/1.YC	Immature
ENSG00000053108	FSTL4	-2.53601	7.28151	0.000241046	0.034816	2.MCI/1.YC	Immature
ENSG00000145832	SLC25A48	-2.08257	3.86663	0.00103085	0.0890579	2.MCI/1.YC	Immature
ENSG00000187678	SPRY4	-3.12354	3.1063	0.000344334	0.0445179	2.MCI/1.YC	Immature
ENSG00000231185	SPRY4-AS1	-2.93117	5.60171	2.19001e-05	0.00653048	2.MCI/1.YC	Immature
ENSG00000236714	LINC01844	-3.17419	1.77249	0.0020788	0.129841	2.MCI/1.YC	Immature
ENSG00000249429	AC016598.1	-9.19994	3.08897	0.00466056	0.206135	2.MCI/1.YC	Immature
ENSG00000249881	AC008696.2	-5.51655	3.35278	2.3707e-05	0.00695706	2.MCI/1.YC	Immature
ENSG00000156463	SH3RF2	-3.42772	2.38415	0.00118491	0.0936176	2.MCI/1.YC	Immature
ENSG00000113721	PDGFRB	-2.28819	3.22707	0.00151679	0.107855	2.MCI/1.YC	Immature
ENSG00000280776	LINC01202	-5.15197	3.81638	1.60859e-06	0.000932751	2.MCI/1.YC	Immature
ENSG00000241956	AC109466.1	-5.00654	6.69593	8.62877e-11	7.97643e-07	2.MCI/1.YC	Immature
ENSG00000253693	AC008415.1	-4.27349	5.65823	6.73895e-09	1.2459e-05	2.MCI/1.YC	Immature
ENSG00000204764	RANBP17	-3.68417	5.55533	8.06816e-07	0.000596657	2.MCI/1.YC	Immature
ENSG00000111863	ADTRP	-7.72562	1.81848	0.00089292	0.0817243	2.MCI/1.YC	Immature
ENSG00000078401	EDN1	-6.92726	1.1725	0.00491909	0.211596	2.MCI/1.YC	Immature
ENSG00000007944	MYLIP	-1.74681	4.11455	0.00278663	0.15059	2.MCI/1.YC	Immature
ENSG00000272168	CASC15	-1.99827	6.90295	0.000262672	0.0365134	2.MCI/1.YC	Immature
ENSG00000286954	AL033539.2	-4.21955	2.11956	0.00305843	0.159279	2.MCI/1.YC	Immature
ENSG00000137185	ZSCAN9	-2.22533	2.0227	0.00633177	0.245878	2.MCI/1.YC	Immature
ENSG00000164530	PI16	-2.49608	2.37992	0.00299298	0.156754	2.MCI/1.YC	Immature
ENSG00000112715	VEGFA	-2.77998	3.11366	0.000427147	0.0519545	2.MCI/1.YC	Immature
ENSG00000112759	SLC29A1	-2.29987	2.48374	0.0044949	0.202725	2.MCI/1.YC	Immature
ENSG00000172348	RCAN2	-3.05198	7.02575	2.11651e-07	0.000186333	2.MCI/1.YC	Immature
ENSG00000069122	ADGRF5	-3.19954	2.37646	0.000767345	0.0762725	2.MCI/1.YC	Immature
ENSG00000244694	PTCHD4	-2.95173	5.66939	9.52361e-06	0.0034524	2.MCI/1.YC	Immature
ENSG00000146147	MLIP	-3.29183	6.46924	4.0129e-06	0.00185699	2.MCI/1.YC	Immature
ENSG00000137252	HCRTR2	-3.08392	2.11429	0.00261807	0.144056	2.MCI/1.YC	Immature
ENSG00000225096	AL445250.1	-1.69909	5.44355	0.00379073	0.181093	2.MCI/1.YC	Immature
ENSG00000112232	KHDRBS2	-1.55171	9.05761	0.00411777	0.191761	2.MCI/1.YC	Immature
ENSG00000112280	COL9A1	-2.92344	3.21145	0.000203246	0.0310547	2.MCI/1.YC	Immature
ENSG00000111799	COL12A1	-2.59809	4.27543	0.000143594	0.0241343	2.MCI/1.YC	Immature
ENSG00000112773	TENT5A	-1.91907	3.49223	0.00323032	0.165895	2.MCI/1.YC	Immature
ENSG00000146242	TPBG	-8.2784	2.29554	0.000748993	0.0758615	2.MCI/1.YC	Immature
ENSG00000135318	NT5E	-2.24351	2.76925	0.00353304	0.173558	2.MCI/1.YC	Immature
ENSG00000287578	AL034348.1	-3.2665	3.4353	8.65758e-05	0.0168486	2.MCI/1.YC	Immature
ENSG00000271860	AL589740.1	-3.97148	7.07907	3.85991e-10	1.18937e-06	2.MCI/1.YC	Immature
ENSG00000152034	MCHR2	-7.92421	4.27237	1.18344e-07	0.000115155	2.MCI/1.YC	Immature
ENSG00000187772	LIN28B	-3.10992	4.10822	0.00589478	0.236919	2.MCI/1.YC	Immature
ENSG00000112394	SLC16A10	-2.09724	4.48083	0.000830465	0.0795525	2.MCI/1.YC	Immature
ENSG00000249853	HS3ST5	-2.63948	6.39384	9.65428e-05	0.0180314	2.MCI/1.YC	Immature
ENSG00000172673	THEMIS	-2.43799	4.05094	0.000249354	0.035462	2.MCI/1.YC	Immature
ENSG00000231023	LINC00326	-2.16011	2.79215	0.00482023	0.210677	2.MCI/1.YC	Immature
ENSG00000171408	PDE7B	-3.33508	6.36065	1.27127e-06	0.000783439	2.MCI/1.YC	Immature
ENSG00000237596	AL138828.1	-1.90689	3.56993	0.00345662	0.172253	2.MCI/1.YC	Immature
[truncated: 7,677 more rows]
