# Supplementary material for: A roadmap to human hippocampal neurogenesis in adulthood, aging and AD.
Source: Research Square preprint supplement (doi:10.21203/rs.3.rs-4469965/v1), 2024-05-30
Supplement: Supplementary file 11 [file c3ea36d39a1ed9a08b0ff2bd.xlsx]

## Sheet: CytoTrace_NCI_Correlation_RNA
ID	rho	p.value	q.value	Symbol
ENSG00000151150	0.818267	0	0	ANK3
ENSG00000245532	-0.786676	0	0	NEAT1
ENSG00000107249	-0.774826	0	0	GLIS3
ENSG00000169760	0.771677	0	0	NLGN1
ENSG00000095637	-0.77031	0	0	SORBS1
ENSG00000164176	0.7681	0	0	EDIL3
ENSG00000154027	0.76462	0	0	AK5
ENSG00000021645	0.76187	0	0	NRXN3
ENSG00000149571	0.759782	0	0	KIRREL3
ENSG00000115252	0.753833	0	0	PDE1A
ENSG00000169306	0.752505	0	0	IL1RAPL1
ENSG00000136237	0.750234	0	0	RAPGEF5
ENSG00000134769	-0.750191	0	0	DTNA
ENSG00000127603	-0.736943	0	0	MACF1
ENSG00000144339	0.733303	0	0	TMEFF2
ENSG00000114757	0.732444	0	0	PEX5L
ENSG00000155886	0.730997	0	0	SLC24A2
ENSG00000153707	0.729203	0	0	PTPRD
ENSG00000198626	0.728692	0	0	RYR2
ENSG00000033122	0.726018	0	0	LRRC7
ENSG00000140600	0.725824	0	0	SH3GL3
ENSG00000174469	0.725762	0	0	CNTNAP2
ENSG00000138411	0.722513	0	0	HECW2
ENSG00000196104	0.704367	0	0	SPOCK3
ENSG00000139915	0.702772	0	0	MDGA2
ENSG00000123119	0.698565	0	0	NECAB1
ENSG00000120251	0.697347	0	0	GRIA2
ENSG00000154217	-0.696795	0	0	PITPNC1
ENSG00000078295	-0.693173	0	0	ADCY2
ENSG00000186487	0.691627	0	0	MYT1L
ENSG00000132932	0.690928	0	0	ATP8A2
ENSG00000185774	0.689582	0	0	KCNIP4
ENSG00000177570	0.68913	0	0	SAMD12
ENSG00000111783	-0.687539	0	0	RFX4
ENSG00000183715	0.687465	0	0	OPCML
ENSG00000151322	-0.687429	0	0	NPAS3
ENSG00000273079	0.684196	0	0	GRIN2B
ENSG00000144290	0.68408	0	0	SLC4A10
ENSG00000164796	0.684032	0	0	CSMD3
ENSG00000157680	0.683325	0	0	DGKI
ENSG00000245832	-0.680532	0	0	MIR4300HG
ENSG00000172995	0.68017	0	0	ARPP21
ENSG00000067715	0.679764	0	0	SYT1
ENSG00000198947	0.679355	0	0	DMD
ENSG00000198216	0.679165	0	0	CACNA1E
ENSG00000131095	-0.678815	0	0	GFAP
ENSG00000188580	0.678158	0	0	NKAIN2
ENSG00000176406	0.678142	0	0	RIMS2
ENSG00000114279	0.6776	0	0	FGF12
ENSG00000143153	0.677353	0	0	ATP1B1
ENSG00000026508	-0.676877	0	0	CD44
ENSG00000115896	0.676087	0	0	PLCL1
ENSG00000215386	-0.676007	0	0	MIR99AHG
ENSG00000198010	0.674871	0	0	DLGAP2
ENSG00000214548	0.674366	0	0	MEG3
ENSG00000155816	-0.673814	0	0	FMN2
ENSG00000136531	0.672966	0	0	SCN2A
ENSG00000168959	0.672373	0	0	GRM5
ENSG00000225206	0.672344	0	0	MIR137HG
ENSG00000078328	0.672057	0	0	RBFOX1
ENSG00000158560	0.671298	0	0	DYNC1I1
ENSG00000132639	0.671063	0	0	SNAP25
ENSG00000145864	0.670725	0	0	GABRB2
ENSG00000070808	0.669731	0	0	CAMK2A
ENSG00000145416	0.669265	0	0	MARCH1
ENSG00000150394	0.668024	0	0	CDH8
ENSG00000287704	-0.667837	0	0	AC012405.1
ENSG00000113319	0.667256	0	0	RASGRF2
ENSG00000112232	0.663187	0	0	KHDRBS2
ENSG00000099204	-0.662789	0	0	ABLIM1
ENSG00000174482	0.662128	0	0	LINGO2
ENSG00000117114	0.661727	0	0	ADGRL2
ENSG00000155052	0.661069	0	0	CNTNAP5
ENSG00000125851	0.661047	0	0	PCSK2
ENSG00000077264	0.660009	0	0	PAK3
ENSG00000183780	0.657264	0	0	SLC35F3
ENSG00000145526	0.657242	0	0	CDH18
ENSG00000153253	0.656812	0	0	SCN3A
ENSG00000132938	0.656296	0	0	MTUS2
ENSG00000166342	0.656004	0	0	NETO1
ENSG00000185274	0.654115	0	0	GALNT17
ENSG00000166006	0.654026	0	0	KCNC2
ENSG00000185532	-0.652877	0	0	PRKG1
ENSG00000154975	0.652557	0	0	CA10
ENSG00000198838	-0.651864	0	0	RYR3
ENSG00000113327	0.651842	0	0	GABRG2
ENSG00000110841	0.651324	0	0	PPFIBP1
ENSG00000183117	0.650516	0	0	CSMD1
ENSG00000157152	0.649419	0	0	SYN2
ENSG00000125675	0.64892	0	0	GRIA3
ENSG00000196872	0.648628	0	0	KIAA1211L
ENSG00000154556	0.648516	0	0	SORBS2
ENSG00000117600	0.648306	0	0	PLPPR4
ENSG00000152578	0.647168	0	0	GRIA4
ENSG00000150672	0.646733	0	0	DLG2
ENSG00000078114	-0.646255	0	0	NEBL
ENSG00000183454	0.645891	0	0	GRIN2A
ENSG00000157542	0.64582	0	0	KCNJ6
ENSG00000147481	0.645326	0	0	SNTG1
ENSG00000225746	0.645273	0	0	MEG8
ENSG00000136928	0.644789	0	0	GABBR2
ENSG00000101489	0.643968	0	0	CELF4
ENSG00000185518	0.643822	0	0	SV2B
ENSG00000139973	0.640714	0	0	SYT16
ENSG00000171617	0.640396	0	0	ENC1
ENSG00000206052	0.638519	0	0	DOK6
ENSG00000177103	0.63818	0	0	DSCAML1
ENSG00000116117	-0.63798	0	0	PARD3B
ENSG00000124406	0.636708	0	0	ATP8A1
ENSG00000152402	0.636279	0	0	GUCY1A2
ENSG00000167281	0.636262	0	0	RBFOX3
ENSG00000135750	0.636237	0	0	KCNK1
ENSG00000113916	-0.63542	0	0	BCL6
ENSG00000206579	0.635359	0	0	XKR4
ENSG00000101445	0.634728	0	0	PPP1R16B
ENSG00000225689	0.634253	0	0	AL008633.1
ENSG00000112379	0.634137	0	0	ARFGEF3
ENSG00000221866	0.633244	0	0	PLXNA4
ENSG00000137941	0.63255	0	0	TTLL7
ENSG00000237515	0.629677	0	0	SHISA9
ENSG00000175471	0.628948	0	0	MCTP1
ENSG00000151490	0.627794	0	0	PTPRO
ENSG00000175874	0.627747	0	0	CREG2
ENSG00000184347	0.627269	0	0	SLIT3
ENSG00000164588	0.626264	0	0	HCN1
ENSG00000003987	0.625668	0	0	MTMR7
ENSG00000157064	0.625049	0	0	NMNAT2
ENSG00000171587	0.623755	0	0	DSCAM
ENSG00000158258	0.623331	0	0	CLSTN2
ENSG00000198739	0.623328	0	0	LRRTM3
ENSG00000140945	0.62311	0	0	CDH13
ENSG00000010810	-0.622638	0	0	FYN
ENSG00000184672	0.619853	0	0	RALYL
ENSG00000145147	0.615649	0	0	SLIT2
ENSG00000168710	-0.615222	0	0	AHCYL1
ENSG00000120885	-0.614817	0	0	CLU
ENSG00000163032	0.614755	0	0	VSNL1
ENSG00000163046	0.61475	0	0	ANKRD30BL
ENSG00000185046	0.613264	0	0	ANKS1B
ENSG00000187323	0.612437	0	0	DCC
ENSG00000151229	0.612434	0	0	SLC2A13
ENSG00000187672	0.612339	0	0	ERC2
ENSG00000166833	-0.611597	0	0	NAV2
ENSG00000148123	0.610528	0	0	PLPPR1
ENSG00000100095	0.610429	0	0	SEZ6L
ENSG00000143772	-0.610361	0	0	ITPKB
ENSG00000157388	0.610269	0	0	CACNA1D
ENSG00000079215	-0.608552	0	0	SLC1A3
ENSG00000151572	0.607986	0	0	ANO4
ENSG00000233723	0.607336	0	0	LINC01122
ENSG00000171435	0.607223	0	0	KSR2
ENSG00000163491	0.606882	0	0	NEK10
ENSG00000172260	0.60659	0	0	NEGR1
ENSG00000144283	0.606039	0	0	PKP4
ENSG00000143473	0.605998	0	0	KCNH1
ENSG00000196277	0.60597	0	0	GRM7
ENSG00000176658	0.60578	0	0	MYO1D
ENSG00000231533	0.605604	0	0	AL391840.1
ENSG00000104435	0.604627	0	0	STMN2
ENSG00000091428	0.603295	0	0	RAPGEF4
ENSG00000151474	0.603146	0	0	FRMD4A
ENSG00000135643	0.602461	0	0	KCNMB4
ENSG00000173406	0.601899	0	0	DAB1
ENSG00000176204	0.601731	0	0	LRRTM4
ENSG00000162105	0.601611	0	0	SHANK2
ENSG00000154146	0.601514	0	0	NRGN
ENSG00000198597	0.601393	0	0	ZNF536
ENSG00000176788	0.601307	0	0	BASP1
ENSG00000169891	0.599933	0	0	REPS2
ENSG00000107518	0.597777	0	0	ATRNL1
ENSG00000104447	-0.597766	0	0	TRPS1
ENSG00000197147	0.597675	0	0	LRRC8B
ENSG00000154162	0.59706	0	0	CDH12
ENSG00000155324	-0.596803	0	0	GRAMD2B
ENSG00000170390	-0.59557	0	0	DCLK2
ENSG00000183775	0.594565	0	0	KCTD16
ENSG00000157654	0.592811	0	0	PALM2-AKAP2
ENSG00000154277	0.592761	0	0	UCHL1
ENSG00000077063	0.591768	0	0	CTTNBP2
ENSG00000079841	0.591626	0	0	RIMS1
ENSG00000166206	0.591449	0	0	GABRB3
ENSG00000143502	0.591385	0	0	SUSD4
ENSG00000259255	-0.591282	0	0	AC073941.1
ENSG00000198108	0.591243	0	0	CHSY3
ENSG00000152894	0.590989	0	0	PTPRK
ENSG00000234423	0.590644	0	0	LINC01250
ENSG00000147488	0.590086	0	0	ST18
ENSG00000170091	0.58969	0	0	NSG2
ENSG00000164742	0.589576	0	0	ADCY1
ENSG00000177614	0.588868	0	0	PGBD5
ENSG00000135063	-0.58876	0	0	FAM189A2
ENSG00000203930	0.588217	0	0	LINC00632
ENSG00000139174	0.588183	0	0	PRICKLE1
ENSG00000170396	0.586029	0	0	ZNF804A
ENSG00000155093	0.5859	0	0	PTPRN2
ENSG00000075340	0.583807	0	0	ADD2
ENSG00000070961	0.583725	0	0	ATP2B1
ENSG00000123104	-0.58315	0	0	ITPR2
ENSG00000204677	0.582869	0	0	FAM153CP
ENSG00000112290	0.582666	0	0	WASF1
ENSG00000152932	0.582409	0	0	RAB3C
ENSG00000244128	0.581988	0	0	LINC01322
ENSG00000138696	-0.580376	0	0	BMPR1B
ENSG00000144642	-0.58004	0	0	RBMS3
ENSG00000133816	0.579638	0	0	MICAL2
ENSG00000064042	0.578701	0	0	LIMCH1
ENSG00000122966	0.578105	0	0	CIT
ENSG00000166922	0.577834	0	0	SCG5
ENSG00000013293	0.577355	0	0	SLC7A14
ENSG00000169744	0.577265	0	0	LDB2
ENSG00000144278	0.576954	0	0	GALNT13
ENSG00000106211	-0.574798	0	0	HSPB1
ENSG00000130558	0.573586	0	0	OLFM1
ENSG00000144218	0.572833	0	0	AFF3
ENSG00000144749	-0.572069	0	0	LRIG1
ENSG00000137968	0.57139	0	0	SLC44A5
ENSG00000048052	0.569814	0	0	HDAC9
ENSG00000177182	0.569223	0	0	CLVS1
ENSG00000106976	0.568841	0	0	DNM1
ENSG00000164236	0.56861	0	0	ANKRD33B
ENSG00000169862	-0.568357	0	0	CTNND2
ENSG00000134532	-0.567742	0	0	SOX5
ENSG00000103184	0.567133	0	0	SEC14L5
ENSG00000078269	0.566667	0	0	SYNJ2
ENSG00000153944	-0.566596	0	0	MSI2
ENSG00000183166	0.566452	0	0	CALN1
ENSG00000154096	0.566293	0	0	THY1
ENSG00000116675	0.565126	0	0	DNAJC6
ENSG00000117519	-0.565072	0	0	CNN3
ENSG00000171885	-0.564941	0	0	AQP4
ENSG00000188641	0.56455	0	0	DPYD
ENSG00000145808	0.564287	0	0	ADAMTS19
ENSG00000116106	0.561544	0	0	EPHA4
ENSG00000186469	0.561513	0	0	GNG2
ENSG00000152822	0.560907	0	0	GRM1
ENSG00000110675	0.560796	0	0	ELMOD1
ENSG00000069667	-0.560784	0	0	RORA
ENSG00000076554	0.56074	0	0	TPD52
ENSG00000117069	0.559896	0	0	ST6GALNAC5
ENSG00000111110	0.559715	0	0	PPM1H
ENSG00000148408	0.559234	0	0	CACNA1B
ENSG00000112541	0.558858	0	0	PDE10A
ENSG00000197971	0.558057	0	0	MBP
ENSG00000135905	0.557805	0	0	DOCK10
ENSG00000152910	0.557784	0	0	CNTNAP4
ENSG00000166501	0.557655	0	0	PRKCB
ENSG00000156103	0.557137	0	0	MMP16
ENSG00000184613	0.55695	0	0	NELL2
ENSG00000078053	0.556656	0	0	AMPH
ENSG00000145242	0.556584	0	0	EPHA5
ENSG00000187122	0.556464	0	0	SLIT1
ENSG00000118596	0.555766	0	0	SLC16A7
ENSG00000154265	0.554837	0	0	ABCA5
ENSG00000260230	0.554412	0	0	FRRS1L
ENSG00000133958	0.553807	0	0	UNC79
ENSG00000175497	-0.553626	0	0	DPP10
ENSG00000151914	-0.553621	0	0	DST
ENSG00000154639	0.55202	0	0	CXADR
ENSG00000113805	0.551793	0	0	CNTN3
ENSG00000145012	-0.551667	0	0	LPP
ENSG00000163697	0.551162	0	0	APBB2
ENSG00000154229	-0.550344	0	0	PRKCA
ENSG00000153956	0.549173	0	0	CACNA2D1
ENSG00000026652	0.549153	0	0	AGPAT4
ENSG00000187164	0.54903	0	0	SHTN1
ENSG00000174776	-0.548811	0	0	WDR49
ENSG00000130643	0.54873	0	0	CALY
ENSG00000139220	0.547592	0	0	PPFIA2
ENSG00000185760	0.547207	0	0	KCNQ5
ENSG00000109738	0.546149	0	0	GLRB
ENSG00000134982	-0.545664	0	0	APC
ENSG00000175161	0.544576	0	0	CADM2
ENSG00000154822	0.543536	0	0	PLCL2
ENSG00000221890	0.54343	0	0	NPTXR
ENSG00000164418	0.541176	0	0	GRIK2
ENSG00000157985	0.540862	0	0	AGAP1
ENSG00000227906	0.540742	0	0	SNAP25-AS1
ENSG00000185650	-0.54072	0	0	ZFP36L1
ENSG00000105810	0.5403	0	0	CDK6
ENSG00000041982	-0.540254	0	0	TNC
ENSG00000196136	-0.540221	0	0	SERPINA3
ENSG00000232044	0.539451	0	0	SILC1
ENSG00000102466	0.539231	0	0	FGF14
ENSG00000008277	0.539059	0	0	ADAM22
ENSG00000183023	0.538572	0	0	SLC8A1
ENSG00000089199	0.53732	0	0	CHGB
ENSG00000112137	0.537118	0	0	PHACTR1
ENSG00000154188	-0.536998	0	0	ANGPT1
ENSG00000162599	-0.53689	0	0	NFIA
ENSG00000184384	-0.535844	0	0	MAML2
ENSG00000283154	0.534883	0	0	IQCJ-SCHIP1
ENSG00000182168	0.534567	0	0	UNC5C
ENSG00000152818	-0.533664	0	0	UTRN
ENSG00000198673	0.533371	0	0	TAFA2
ENSG00000224078	0.533103	0	0	SNHG14
ENSG00000128245	0.532755	0	0	YWHAH
ENSG00000108684	0.532623	0	0	ASIC2
ENSG00000152154	0.532481	0	0	TMEM178A
ENSG00000277363	0.531697	0	0	SRCIN1
ENSG00000162545	0.531316	0	0	CAMK2N1
ENSG00000258162	0.530209	0	0	AC069228.1
ENSG00000198300	0.529628	0	0	PEG3
ENSG00000198668	0.527613	0	0	CALM1
ENSG00000117707	0.52761	0	0	PROX1
ENSG00000075223	0.525812	0	0	SEMA3C
ENSG00000105290	0.525152	0	0	APLP1
ENSG00000184305	0.52501	0	0	CCSER1
ENSG00000164199	-0.524339	0	0	ADGRV1
ENSG00000260372	-0.524235	0	0	AQP4-AS1
ENSG00000251600	0.523528	0	0	AC107223.1
ENSG00000133169	0.523436	0	0	BEX1
ENSG00000160014	0.523197	0	0	CALM3
ENSG00000148053	-0.523124	0	0	NTRK2
ENSG00000163539	0.522522	0	0	CLASP2
ENSG00000114541	0.522084	0	0	FRMD4B
ENSG00000119771	0.521652	0	0	KLHL29
ENSG00000128585	-0.521164	0	0	MKLN1
ENSG00000286757	-0.520995	0	0	AL137139.2
ENSG00000241684	-0.520562	0	0	ADAMTS9-AS2
ENSG00000169902	-0.520545	0	0	TPST1
ENSG00000141639	-0.520277	0	0	MAPK4
ENSG00000139737	0.519974	0	0	SLAIN1
ENSG00000145335	0.519765	0	0	SNCA
ENSG00000182621	0.519293	0	0	PLCB1
ENSG00000164061	0.518801	0	0	BSN
ENSG00000165379	0.518718	0	0	LRFN5
ENSG00000155849	0.518343	0	0	ELMO1
ENSG00000169855	0.517783	0	0	ROBO1
ENSG00000277586	0.517224	0	0	NEFL
ENSG00000131773	0.517058	0	0	KHDRBS3
ENSG00000129116	-0.516119	0	0	PALLD
ENSG00000155511	0.515832	0	0	GRIA1
ENSG00000253553	0.514793	0	0	AC090578.1
ENSG00000008394	-0.514312	0	0	MGST1
ENSG00000165246	0.513731	0	0	NLGN4Y
ENSG00000158445	0.513167	0	0	KCNB1
ENSG00000055208	-0.512622	0	0	TAB2
ENSG00000172915	0.511937	0	0	NBEA
ENSG00000117525	-0.511807	0	0	F3
ENSG00000185305	0.510667	0	0	ARL15
ENSG00000152377	0.509845	0	0	SPOCK1
ENSG00000050438	0.509807	0	0	SLC4A8
ENSG00000116147	0.509417	0	0	TNR
ENSG00000116641	-0.509391	0	0	DOCK7
ENSG00000015592	0.509301	0	0	STMN4
ENSG00000183579	-0.50903	0	0	ZNRF3
ENSG00000183662	0.509027	0	0	TAFA1
ENSG00000006740	0.508289	0	0	ARHGAP44
ENSG00000148082	0.505663	0	0	SHC3
ENSG00000184156	0.504572	0	0	KCNQ3
ENSG00000185666	0.504422	0	0	SYN3
ENSG00000224924	0.503967	0	0	LINC00320
ENSG00000162687	0.503843	0	0	KCNT2
ENSG00000163399	0.502692	0	1.53552e-307	ATP1A1
ENSG00000173258	0.502497	0	2.89473e-307	ZNF483
ENSG00000138311	0.501942	1.05719e-307	1.75594e-306	ZNF365
ENSG00000106278	-0.501634	2.87951e-307	4.76934e-306	PTPRZ1
ENSG00000152413	0.501633	2.89216e-307	4.77692e-306	HOMER1
ENSG00000148498	-0.499496	2.91907e-304	4.80793e-303	PARD3
ENSG00000225783	0.499354	4.61284e-304	7.5766e-303	MIAT
ENSG00000168280	0.498192	1.94398e-302	3.18415e-301	KIF5C
ENSG00000131370	0.498052	3.04735e-302	4.97763e-301	SH3BP5
ENSG00000138193	-0.497884	5.21481e-302	8.49455e-301	PLCE1
ENSG00000228408	-0.497437	2.18449e-301	3.54859e-300	AL031056.1
ENSG00000151692	0.497219	4.40241e-301	7.13191e-300	RNF144A
ENSG00000099308	0.496837	1.4921e-300	2.41059e-299	MAST3
ENSG00000185352	0.4962	1.1432e-299	1.8419e-298	HS6ST3
ENSG00000065809	0.495699	5.6346e-299	9.05364e-298	FAM107B
ENSG00000113657	-0.495617	7.33364e-299	1.17517e-297	DPYSL3
ENSG00000215244	-0.495236	2.46055e-298	3.93223e-297	LINC02649
ENSG00000142875	0.495189	2.85743e-298	4.55417e-297	PRKACB
ENSG00000149972	0.494964	5.84706e-298	9.294e-297	CNTN5
ENSG00000112902	0.494577	1.99765e-297	3.16679e-296	SEMA5A
ENSG00000064651	0.494431	3.17341e-297	5.01721e-296	SLC12A2
ENSG00000106070	0.493165	1.74782e-295	2.75596e-294	GRB10
ENSG00000229807	-0.493004	2.89901e-295	4.559e-294	XIST
ENSG00000105696	0.492746	6.54576e-295	1.02666e-293	TMEM59L
ENSG00000117632	0.49228	2.84645e-294	4.45266e-293	STMN1
ENSG00000124440	-0.492273	2.90929e-294	4.53895e-293	HIF3A
ENSG00000158270	-0.490756	3.41873e-292	5.31972e-291	COLEC12
ENSG00000151552	0.490514	7.29947e-292	1.13285e-290	QDPR
ENSG00000079482	-0.489638	1.12815e-290	1.74626e-289	OPHN1
ENSG00000172348	0.488959	9.35854e-290	1.44483e-288	RCAN2
ENSG00000064763	0.488509	3.79508e-289	5.84383e-288	FAR2
ENSG00000133318	0.488438	4.73984e-289	7.27965e-288	RTN3
ENSG00000259616	-0.488281	7.71261e-289	1.18147e-287	AC104574.2
ENSG00000127955	0.488209	9.66822e-289	1.47721e-287	GNAI1
ENSG00000229989	0.487724	4.35051e-288	6.63004e-287	MIR181A1HG
ENSG00000102109	0.487384	1.24745e-287	1.89619e-286	PCSK1N
ENSG00000135048	0.487	4.09958e-287	6.21559e-286	CEMIP2
ENSG00000163995	0.486009	8.77474e-286	1.32698e-284	ABLIM2
ENSG00000141837	0.485714	2.17387e-285	3.2791e-284	CACNA1A
ENSG00000189241	0.484852	3.08377e-284	4.63979e-283	TSPYL1
ENSG00000075651	0.484687	5.12863e-284	7.69686e-283	PLD1
ENSG00000156299	0.483817	7.39116e-283	1.10643e-281	TIAM1
ENSG00000140022	-0.48186	2.89993e-280	4.33012e-279	STON2
ENSG00000115419	0.481526	8.00696e-280	1.19257e-278	GLS
ENSG00000151690	0.481089	3.0115e-279	4.47412e-278	MFSD6
ENSG00000197584	0.480756	8.28685e-279	1.22807e-277	KCNMB2
ENSG00000273032	0.479892	1.13211e-277	1.67354e-276	DGCR9
ENSG00000173926	-0.4793	6.74718e-277	9.94915e-276	MARCH3
ENSG00000064225	0.478281	1.45527e-275	2.14055e-274	ST3GAL6
ENSG00000136068	0.47798	3.58792e-275	5.26436e-274	FLNB
ENSG00000156475	-0.476993	6.91723e-274	1.01242e-272	PPP2R2B
ENSG00000122778	0.476319	5.19408e-273	7.58336e-272	KIAA1549
ENSG00000073969	0.475681	3.47958e-272	5.06768e-271	NSF
ENSG00000269821	0.474067	4.21915e-270	6.12968e-269	KCNQ1OT1
ENSG00000175175	0.473887	7.20502e-270	1.0442e-268	PPM1E
ENSG00000176728	0.473818	8.83423e-270	1.27718e-268	TTTY14
ENSG00000117155	0.473394	3.09292e-269	4.4606e-268	SSX2IP
ENSG00000147408	-0.472224	9.77452e-268	1.40625e-266	CSGALNACT1
ENSG00000198929	0.471939	2.26449e-267	3.24998e-266	NOS1AP
ENSG00000007237	0.470985	3.73353e-266	5.34536e-265	GAS7
ENSG00000110693	-0.470904	4.73624e-266	6.76459e-265	SOX6
ENSG00000147010	0.470583	1.21519e-265	1.73142e-264	SH3KBP1
ENSG00000154429	0.470419	1.9651e-265	2.79319e-264	CCSAP
ENSG00000186153	-0.469515	2.76456e-264	3.92011e-263	WWOX
ENSG00000130226	0.469301	5.16118e-264	7.30097e-263	DPP6
ENSG00000152137	-0.46922	6.53976e-264	9.22902e-263	HSPB8
ENSG00000020577	-0.468325	8.85062e-263	1.24604e-261	SAMD4A
ENSG00000173320	0.468274	1.02537e-262	1.44014e-261	STOX2
ENSG00000114374	0.467215	2.22151e-261	3.11275e-260	USP9Y
ENSG00000251562	-0.46663	1.20758e-260	1.68804e-259	MALAT1
ENSG00000170579	0.466436	2.11189e-260	2.94519e-259	DLGAP1
ENSG00000173726	0.466381	2.47856e-260	3.44841e-259	TOMM20
ENSG00000138604	0.465823	1.24225e-259	1.72428e-258	GLCE
ENSG00000072952	-0.465726	1.64176e-259	2.27347e-258	MRVI1
ENSG00000170921	0.465496	3.18524e-259	4.40054e-258	TANC2
ENSG00000137693	-0.465355	4.77467e-259	6.58103e-258	YAP1
ENSG00000166913	0.465132	9.073e-259	1.24764e-257	YWHAB
ENSG00000165868	0.465011	1.28743e-258	1.76626e-257	HSPA12A
ENSG00000131242	0.464454	6.38263e-258	8.73622e-257	RAB11FIP4
ENSG00000114204	-0.464174	1.42433e-257	1.94505e-256	SERPINI2
ENSG00000020129	0.463696	5.60473e-257	7.63612e-256	NCDN
ENSG00000170345	-0.463387	1.35539e-256	1.84239e-255	FOS
ENSG00000251442	-0.463319	1.64853e-256	2.23573e-255	LINC01094
ENSG00000196876	0.463169	2.52968e-256	3.42289e-255	SCN8A
ENSG00000068615	0.463013	3.94615e-256	5.32731e-255	REEP1
ENSG00000116132	-0.462345	2.65887e-255	3.5813e-254	PRRX1
ENSG00000135472	0.461662	1.86156e-254	2.50169e-253	FAIM2
ENSG00000171791	-0.461638	1.98929e-254	2.66728e-253	BCL2
ENSG00000114698	-0.461517	2.81081e-254	3.76026e-253	PLSCR4
ENSG00000101463	0.461422	3.68237e-254	4.91509e-253	SYNDIG1
ENSG00000115423	0.461142	8.14231e-254	1.08436e-252	DNAH6
ENSG00000115944	0.461051	1.05596e-253	1.40313e-252	COX7A2L
ENSG00000132470	-0.460837	1.93847e-253	2.56999e-252	ITGB4
ENSG00000164161	0.460655	3.24404e-253	4.29128e-252	HHIP
ENSG00000149091	0.46058	4.00929e-253	5.29173e-252	DGKZ
ENSG00000102471	0.460566	4.17844e-253	5.5027e-252	NDFIP2
ENSG00000113594	-0.460534	4.57129e-253	6.00668e-252	LIFR
ENSG00000287862	-0.459619	6.08382e-252	7.97642e-251	AC114971.1
ENSG00000101856	0.459194	2.01958e-251	2.64198e-250	PGRMC1
ENSG00000145087	0.457358	3.53299e-249	4.6116e-248	STXBP5L
ENSG00000141469	-0.456456	4.40804e-248	5.74114e-247	SLC14A1
ENSG00000175764	0.455831	2.52536e-247	3.28186e-246	TTLL11
ENSG00000164659	0.454661	6.55984e-246	8.50621e-245	KIAA1324L
ENSG00000166086	0.454238	2.12333e-245	2.74732e-244	JAM3
ENSG00000112186	0.453395	2.19133e-244	2.82912e-243	CAP2
ENSG00000128739	0.453018	6.22433e-244	8.0184e-243	SNRPN
ENSG00000169554	0.452798	1.14132e-243	1.4671e-242	ZEB2
ENSG00000142192	0.452325	4.21831e-243	5.41061e-242	APP
ENSG00000139970	0.452149	6.85135e-243	8.76884e-242	RTN1
ENSG00000185008	0.451781	1.88315e-242	2.40499e-241	ROBO2
ENSG00000102271	0.451714	2.26509e-242	2.88653e-241	KLHL4
ENSG00000103489	0.451663	2.60952e-242	3.3183e-241	XYLT1
ENSG00000102003	0.451645	2.73672e-242	3.47258e-241	SYP
ENSG00000060709	0.451587	3.21727e-242	4.0736e-241	RIMBP2
ENSG00000186472	0.450134	1.72884e-240	2.18432e-239	PCLO
ENSG00000120899	0.449953	2.8371e-240	3.57692e-239	PTK2B
ENSG00000158966	-0.449789	4.45249e-240	5.60161e-239	CACHD1
ENSG00000087095	0.449746	4.99667e-240	6.27289e-239	NLK
ENSG00000009413	-0.448592	1.16426e-238	1.45853e-237	REV3L
ENSG00000236886	0.448578	1.20973e-238	1.51229e-237	AC007563.2
ENSG00000152583	-0.448251	2.94973e-238	3.67969e-237	SPARCL1
ENSG00000168314	0.448081	4.67578e-238	5.8206e-237	MOBP
ENSG00000139154	0.447953	6.61962e-238	8.22307e-237	AEBP2
ENSG00000151012	-0.447944	6.77949e-238	8.40401e-237	SLC7A11
ENSG00000101542	-0.447458	2.54119e-237	3.14353e-236	CDH20
ENSG00000182901	0.446741	1.7706e-236	2.18571e-235	RGS7
ENSG00000115365	0.446645	2.29863e-236	2.83163e-235	LANCL1
ENSG00000165124	0.445721	2.78684e-235	3.4259e-234	SVEP1
ENSG00000050030	0.445559	4.31535e-235	5.29391e-234	NEXMIF
ENSG00000115239	-0.444889	2.61381e-234	3.19988e-233	ASB3
ENSG00000165084	0.444517	7.10536e-234	8.68058e-233	C8orf34
ENSG00000133134	0.444334	1.16279e-233	1.41764e-232	BEX2
ENSG00000169933	0.443582	8.71487e-233	1.06031e-231	FRMPD4
ENSG00000155897	-0.443145	2.81045e-232	3.41236e-231	ADCY8
ENSG00000188191	0.442989	4.26027e-232	5.16209e-231	PRKAR1B
ENSG00000163536	0.442851	6.16818e-232	7.45858e-231	SERPINI1
ENSG00000198794	0.442466	1.72272e-231	2.07886e-230	SCAMP5
ENSG00000136717	0.442161	3.88155e-231	4.67446e-230	BIN1
ENSG00000177990	0.441787	1.05082e-230	1.26291e-229	DPY19L2
ENSG00000150625	-0.441355	3.31416e-230	3.97497e-229	GPM6A
ENSG00000186231	0.441034	7.77465e-230	9.30597e-229	KLHL32
ENSG00000168077	-0.440362	4.62152e-229	5.52062e-228	SCARA3
ENSG00000123684	0.439659	2.96507e-228	3.53477e-227	LPGAT1
ENSG00000236790	-0.439619	3.30046e-228	3.92669e-227	LINC00299
ENSG00000185565	-0.438961	1.87446e-227	2.22564e-226	LSAMP
ENSG00000034677	-0.438805	2.82546e-227	3.34809e-226	RNF19A
ENSG00000152990	-0.438791	2.93234e-227	3.46779e-226	ADGRA3
ENSG00000053524	0.437842	3.55692e-226	4.19802e-225	MCF2L2
ENSG00000188385	0.437523	8.21699e-226	9.6787e-225	JAKMIP3
ENSG00000054690	0.437515	8.39486e-226	9.86855e-225	PLEKHH1
ENSG00000108924	0.4352	3.55371e-223	4.16926e-222	HLF
ENSG00000111058	-0.434285	3.83482e-222	4.49016e-221	ACSS3
ENSG00000083123	-0.434089	6.38278e-222	7.45877e-221	BCKDHB
ENSG00000145990	0.434024	7.54931e-222	8.80455e-221	GFOD1
ENSG00000174306	-0.433954	9.05626e-222	1.05413e-220	ZHX3
ENSG00000136111	0.433813	1.30389e-221	1.51471e-220	TBC1D4
ENSG00000227088	0.433016	1.02518e-220	1.18861e-219	AC012494.1
ENSG00000170027	0.43266	2.56972e-220	2.97353e-219	YWHAG
ENSG00000148948	0.432023	1.32886e-219	1.53467e-218	LRRC4C
ENSG00000162989	0.431344	7.62569e-219	8.78961e-218	KCNJ3
ENSG00000010404	0.430494	6.73801e-218	7.75133e-217	IDS
ENSG00000138685	-0.429238	1.67399e-216	1.92201e-215	FGF2
ENSG00000109956	0.429219	1.75629e-216	2.01258e-215	B3GAT1
ENSG00000151025	0.428917	3.79378e-216	4.339e-215	GPR158
ENSG00000170873	0.428884	4.13071e-216	4.71523e-215	MTSS1
ENSG00000183878	0.428511	1.06548e-215	1.21391e-214	UTY
ENSG00000133401	0.428182	2.46055e-215	2.79793e-214	PDZD2
ENSG00000014641	0.427999	3.92469e-215	4.45426e-214	MDH1
ENSG00000132359	0.427843	5.82496e-215	6.59828e-214	RAP1GAP2
ENSG00000033867	0.427619	1.03043e-214	1.16499e-213	SLC4A7
ENSG00000135540	-0.427196	3.0043e-214	3.39016e-213	NHSL1
ENSG00000182247	0.426602	1.35411e-213	1.52512e-212	UBE2E2
ENSG00000174607	0.426597	1.37071e-213	1.54087e-212	UGT8
ENSG00000069535	-0.426369	2.44023e-213	2.73796e-212	MAOB
ENSG00000146021	0.425738	1.19721e-212	1.34074e-211	KLHL3
ENSG00000159082	0.425044	6.87318e-212	7.68263e-211	SYNJ1
ENSG00000152208	0.425028	7.16533e-212	7.99408e-211	GRID2
ENSG00000181409	0.4248	1.26918e-211	1.41331e-210	AATK
ENSG00000121904	0.424772	1.36274e-211	1.51464e-210	CSMD2
ENSG00000198822	0.424367	3.77009e-211	4.18247e-210	GRM3
ENSG00000123416	0.424269	4.8248e-211	5.34252e-210	TUBA1B
ENSG00000212719	0.423625	2.41946e-210	2.67407e-209	LINC02693
ENSG00000064787	0.423457	3.68802e-210	4.06851e-209	BCAS1
ENSG00000178974	0.423246	6.2463e-210	6.87791e-209	FBXO34
ENSG00000141404	0.423245	6.26871e-210	6.88975e-209	GNAL
ENSG00000103710	-0.422525	3.77569e-209	4.14205e-208	RASL12
ENSG00000111728	-0.422473	4.30357e-209	4.71241e-208	ST8SIA1
ENSG00000136960	0.422307	6.51738e-209	7.12335e-208	ENPP2
ENSG00000165029	-0.421708	2.88987e-208	3.15273e-207	ABCA1
ENSG00000197372	0.420899	2.15739e-207	2.34929e-206	ZNF675
ENSG00000165704	0.42089	2.20732e-207	2.39925e-206	HPRT1
ENSG00000075391	0.420626	4.24745e-207	4.60829e-206	RASAL2
ENSG00000121989	0.420553	5.07917e-207	5.50057e-206	ACVR2A
ENSG00000163686	0.420303	9.4442e-207	1.02091e-205	ABHD6
ENSG00000132640	0.419654	4.7016e-206	5.07309e-205	BTBD3
ENSG00000162407	-0.419235	1.32042e-205	1.42215e-204	PLPP3
ENSG00000135298	0.418978	2.48822e-205	2.67506e-204	ADGRB3
ENSG00000114790	-0.418689	5.06712e-205	5.43773e-204	ARHGEF26
ENSG00000182670	0.418633	5.81815e-205	6.23237e-204	TTC3
ENSG00000116729	-0.418547	7.19859e-205	7.69715e-204	WLS
ENSG00000160460	0.418407	1.016e-204	1.08441e-203	SPTBN4
ENSG00000156687	0.41826	1.45902e-204	1.55445e-203	UNC5D
ENSG00000185883	0.418117	2.07149e-204	2.20301e-203	ATP6V0C
ENSG00000179456	0.418057	2.40245e-204	2.5504e-203	ZBTB18
ENSG00000109466	0.417336	1.40707e-203	1.49104e-202	KLHL2
ENSG00000183960	0.416977	3.39171e-203	3.58769e-202	KCNH8
ENSG00000164830	0.416889	4.20363e-203	4.43859e-202	OXR1
ENSG00000135333	0.416498	1.09448e-202	1.15359e-201	EPHA7
ENSG00000242593	0.416284	1.84504e-202	1.94123e-201	AC006148.1
ENSG00000081189	0.416172	2.4245e-202	2.54637e-201	MEF2C
ENSG00000072071	0.416105	2.85778e-202	2.99611e-201	ADGRL1
ENSG00000186417	0.416007	3.62717e-202	3.79601e-201	GLDN
ENSG00000154310	-0.415554	1.09338e-201	1.14225e-200	TNIK
ENSG00000133424	0.415209	2.53087e-201	2.63934e-200	LARGE1
ENSG00000184792	0.41501	4.11273e-201	4.28144e-200	OSBP2
ENSG00000165300	0.414784	7.12001e-201	7.39906e-200	SLITRK5
ENSG00000078018	0.414483	1.47999e-200	1.53529e-199	MAP2
ENSG00000187764	0.414192	2.9918e-200	3.09817e-199	SEMA4D
ENSG00000153310	0.414033	4.40553e-200	4.55418e-199	FAM49B
ENSG00000084070	0.413479	1.68347e-199	1.73724e-198	SMAP2
ENSG00000130770	0.412976	5.66966e-199	5.84054e-198	ATP5IF1
ENSG00000285783	0.41277	9.33608e-199	9.60074e-198	AC098588.3
ENSG00000147202	0.412456	1.99128e-198	2.04417e-197	DIAPH2
ENSG00000253877	0.41235	2.56593e-198	2.62953e-197	LINC01608
ENSG00000170525	-0.412153	4.12788e-198	4.22286e-197	PFKFB3
ENSG00000144285	0.412004	5.89988e-198	6.02522e-197	SCN1A
ENSG00000180694	0.411907	7.45273e-198	7.59793e-197	TMEM64
ENSG00000138101	0.411902	7.54252e-198	7.67623e-197	DTNB
ENSG00000152495	0.411869	8.17487e-198	8.3055e-197	CAMK4
ENSG00000130413	-0.411801	9.6335e-198	9.77065e-197	STK33
ENSG00000234377	-0.411483	2.06564e-197	2.09146e-196	OBI1-AS1
ENSG00000156976	0.411293	3.26391e-197	3.29906e-196	EIF4A2
ENSG00000168438	0.410309	3.45008e-196	3.48129e-195	CDC40
ENSG00000132824	0.410287	3.63751e-196	3.66415e-195	SERINC3
ENSG00000107798	0.410278	3.71014e-196	3.73096e-195	LIPA
ENSG00000123560	0.409936	8.41658e-196	8.44945e-195	PLP1
ENSG00000104093	0.409859	1.00971e-195	1.01193e-194	DMXL2
ENSG00000243156	0.409454	2.65717e-195	2.65852e-194	MICAL3
ENSG00000259070	0.409389	3.1012e-195	3.09753e-194	LINC00639
ENSG00000119865	0.409199	4.88722e-195	4.87321e-194	CNRIP1
ENSG00000154678	0.408803	1.25431e-194	1.24861e-193	PDE1C
ENSG00000163006	0.408552	2.27552e-194	2.26137e-193	CCDC138
ENSG00000133083	-0.408491	2.63275e-194	2.61199e-193	DCLK1
ENSG00000168000	0.408302	4.12437e-194	4.08499e-193	BSCL2
ENSG00000287277	-0.408133	6.15901e-194	6.09e-193	AL392086.3
ENSG00000131386	-0.407817	1.30446e-193	1.28769e-192	GALNT15
ENSG00000176463	0.407747	1.5412e-193	1.51886e-192	SLCO3A1
ENSG00000158352	0.407601	2.1788e-193	2.14364e-192	SHROOM4
ENSG00000066629	0.407253	4.9665e-193	4.87823e-192	EML1
ENSG00000251034	-0.40688	1.20037e-192	1.17708e-191	AC087854.1
ENSG00000052795	0.406833	1.34074e-192	1.31255e-191	FNIP2
ENSG00000229236	0.406647	2.08054e-192	2.03343e-191	TTTY10
ENSG00000136153	0.406411	3.63188e-192	3.54378e-191	LMO7
ENSG00000074211	0.406308	4.63955e-192	4.51955e-191	PPP2R2C
ENSG00000197959	0.406041	8.70492e-192	8.46582e-191	DNM3
ENSG00000156298	0.405945	1.09024e-191	1.05855e-190	TSPAN7
ENSG00000149269	0.405744	1.75245e-191	1.69872e-190	PAK1
ENSG00000111912	0.40538	4.13071e-191	3.99753e-190	NCOA7
ENSG00000166681	0.405065	8.64552e-191	8.3531e-190	BEX3
ENSG00000204843	0.404983	1.04987e-190	1.0127e-189	DCTN1
ENSG00000095002	0.404973	1.07399e-190	1.03429e-189	MSH2
ENSG00000249307	-0.404867	1.37716e-190	1.32409e-189	LINC01088
ENSG00000163947	-0.40461	2.51988e-190	2.41821e-189	ARHGEF3
ENSG00000169567	0.404609	2.52331e-190	2.41821e-189	HINT1
ENSG00000257815	0.404354	4.58641e-190	4.38826e-189	AC025159.1
ENSG00000180998	0.404127	7.81734e-190	7.46752e-189	GPR137C
ENSG00000196159	0.403465	3.67305e-189	3.50303e-188	FAT4
ENSG00000103404	0.403403	4.25036e-189	4.04708e-188	USP31
ENSG00000175322	0.403184	7.086e-189	6.73626e-188	ZNF519
ENSG00000074590	0.403165	7.41664e-189	7.03926e-188	NUAK1
ENSG00000241697	0.402953	1.21621e-188	1.15248e-187	TMEFF1
ENSG00000113387	0.402786	1.79192e-188	1.69529e-187	SUB1
ENSG00000175155	0.402257	6.14441e-188	5.80382e-187	YPEL2
ENSG00000166136	0.401878	1.48657e-187	1.40193e-186	NDUFB8
ENSG00000197535	0.401016	1.0984e-186	1.03421e-185	MYO5A
ENSG00000159685	0.400839	1.65519e-186	1.55598e-185	CHCHD6
ENSG00000136854	0.400817	1.74241e-186	1.63537e-185	STXBP1
ENSG00000245293	0.40064	2.62509e-186	2.45993e-185	AC096564.1
ENSG00000178568	-0.400116	8.80368e-186	8.23674e-185	ERBB4
ENSG00000133056	0.400095	9.24974e-186	8.64039e-185	PIK3C2B
ENSG00000150995	0.400012	1.12059e-185	1.04512e-184	ITPR1
ENSG00000117266	0.399634	2.68083e-185	2.49634e-184	CDK18
ENSG00000157470	0.399561	3.17228e-185	2.94932e-184	FAM81A
ENSG00000286749	0.399549	3.26125e-185	3.02728e-184	AC008571.2
ENSG00000154493	0.399518	3.50281e-185	3.24642e-184	C10orf90
ENSG00000011426	0.399362	5.01596e-185	4.64153e-184	ANLN
ENSG00000173905	-0.399279	6.06959e-185	5.60773e-184	GOLIM4
ENSG00000214338	0.399049	1.03025e-184	9.50369e-184	SOGA3
ENSG00000248905	0.398977	1.21762e-184	1.12147e-183	FMN1
ENSG00000172020	0.398667	2.48397e-184	2.28425e-183	GAP43
ENSG00000088387	0.398596	2.92481e-184	2.68547e-183	DOCK9
ENSG00000249740	-0.398536	3.35382e-184	3.07459e-183	OSMR-AS1
ENSG00000115310	0.397968	1.23585e-183	1.1312e-182	RTN4
ENSG00000151746	-0.397938	1.32295e-183	1.20906e-182	BICD1
ENSG00000080822	0.397612	2.79229e-183	2.54797e-182	CLDND1
ENSG00000183580	-0.397602	2.86026e-183	2.60597e-182	FBXL7
ENSG00000048991	0.396667	2.42487e-182	2.20589e-181	R3HDM1
ENSG00000088832	0.396657	2.48091e-182	2.2534e-181	FKBP1A
ENSG00000038427	-0.39645	3.97434e-182	3.60434e-181	VCAN
ENSG00000144040	-0.396419	4.26615e-182	3.86306e-181	SFXN5
ENSG00000253944	-0.396121	8.41435e-182	7.60765e-181	AC027117.2
ENSG00000005249	0.395358	4.7756e-181	4.31117e-180	PRKAR2B
ENSG00000079335	-0.395317	5.2485e-181	4.73085e-180	CDC14A
ENSG00000148737	-0.395164	7.42471e-181	6.68224e-180	TCF7L2
ENSG00000172461	-0.394738	1.95339e-180	1.75538e-179	FUT9
ENSG00000146352	0.394145	7.48927e-180	6.71988e-179	CLVS2
ENSG00000189043	0.394014	1.00638e-179	9.01625e-179	NDUFA4
ENSG00000204186	0.393849	1.46206e-179	1.30789e-178	ZDBF2
ENSG00000102409	0.393845	1.47394e-179	1.31653e-178	BEX4
ENSG00000120658	0.39368	2.14303e-179	1.91127e-178	ENOX1
ENSG00000102780	0.39362	2.44968e-179	2.18147e-178	DGKH
ENSG00000187239	-0.393525	3.03535e-179	2.69895e-178	FNBP1
ENSG00000109472	-0.392816	1.50475e-178	1.33598e-177	CPE
ENSG00000171492	0.392698	1.9595e-178	1.73711e-177	LRRC8D
ENSG00000165959	0.392409	3.7605e-178	3.32872e-177	CLMN
ENSG00000111897	0.392387	3.94974e-178	3.491e-177	SERINC1
ENSG00000125249	0.392369	4.11386e-178	3.63063e-177	RAP2A
ENSG00000139364	0.392346	4.33416e-178	3.81936e-177	TMEM132B
ENSG00000152767	-0.392234	5.57286e-178	4.90362e-177	FARP1
ENSG00000128656	0.391906	1.16363e-177	1.02237e-176	CHN1
ENSG00000136002	-0.391842	1.34324e-177	1.17842e-176	ARHGEF4
ENSG00000080224	0.391839	1.35204e-177	1.18439e-176	EPHA6
ENSG00000165434	0.391681	1.92744e-177	1.68594e-176	PGM2L1
ENSG00000107779	-0.391555	2.56043e-177	2.23631e-176	BMPR1A
ENSG00000183783	0.391462	3.15097e-177	2.74804e-176	KCTD8
ENSG00000226476	-0.39142	3.46051e-177	3.01355e-176	LINC01748
ENSG00000196262	0.391401	3.61464e-177	3.14315e-176	PPIA
ENSG00000144868	0.390812	1.35243e-176	1.17429e-175	TMEM108
ENSG00000086205	0.390753	1.54225e-176	1.33714e-175	FOLH1
ENSG00000018408	-0.390738	1.59618e-176	1.38188e-175	WWTR1
ENSG00000183230	0.390418	3.25737e-176	2.81591e-175	CTNNA3
ENSG00000075711	0.390093	6.73934e-176	5.81748e-175	DLG1
ENSG00000089041	0.389802	1.2896e-175	1.11158e-174	P2RX7
ENSG00000174456	0.389762	1.41006e-175	1.21363e-174	C12orf76
ENSG00000126217	0.389447	2.84018e-175	2.44099e-174	MCF2L
ENSG00000018625	-0.389236	4.54274e-175	3.89858e-174	ATP1A2
ENSG00000138078	0.389036	7.08493e-175	6.07147e-174	PREPL
ENSG00000125827	0.388718	1.43865e-174	1.22975e-173	TMX4
ENSG00000164414	0.388717	1.43918e-174	1.22975e-173	SLC35A1
ENSG00000111731	0.388219	4.35383e-174	3.71489e-173	C2CD5
ENSG00000253807	0.38811	5.53861e-174	4.71899e-173	LINC01170
ENSG00000112697	0.388001	7.04334e-174	5.99241e-173	TMEM30A
ENSG00000028839	0.387675	1.45085e-173	1.2326e-172	TBPL1
ENSG00000257894	0.387582	1.78254e-173	1.51222e-172	AC027288.3
ENSG00000103540	0.386701	1.24809e-172	1.0573e-171	CCP110
ENSG00000204655	0.386535	1.79926e-172	1.52204e-171	MOG
ENSG00000047457	-0.386299	3.02464e-172	2.55496e-171	CP
ENSG00000131089	0.386228	3.53442e-172	2.98132e-171	ARHGEF9
ENSG00000131626	-0.385815	8.7786e-172	7.39428e-171	PPFIA1
ENSG00000070087	0.385153	3.75802e-171	3.16091e-170	PFN2
ENSG00000134531	-0.384466	1.69181e-170	1.42097e-169	EMP1
ENSG00000137501	0.384437	1.80158e-170	1.51102e-169	SYTL2
ENSG00000180776	0.384369	2.08873e-170	1.74939e-169	ZDHHC20
ENSG00000151276	0.384221	2.89034e-170	2.41734e-169	MAGI1
ENSG00000107679	0.384067	4.04865e-170	3.38131e-169	PLEKHA1
ENSG00000204178	0.383873	6.17748e-170	5.15197e-169	MACO1
ENSG00000231252	-0.383815	7.0164e-170	5.84337e-169	AC099792.1
ENSG00000135838	-0.3838	7.24086e-170	6.02183e-169	NPL
ENSG00000148482	-0.383745	8.1778e-170	6.79148e-169	SLC39A12
ENSG00000111961	-0.383643	1.02079e-169	8.46556e-169	SASH1
ENSG00000065609	0.383602	1.11645e-169	9.24587e-169	SNAP91
ENSG00000084731	0.383526	1.31778e-169	1.0898e-168	KIF3C
ENSG00000092096	0.383497	1.40319e-169	1.15881e-168	SLC22A17
ENSG00000111711	0.383475	1.47183e-169	1.2138e-168	GOLT1B
ENSG00000147509	-0.382451	1.36902e-168	1.12744e-167	RGS20
ENSG00000164292	-0.382445	1.3858e-168	1.13967e-167	RHOBTB3
ENSG00000096384	0.382279	1.98756e-168	1.63228e-167	HSP90AB1
ENSG00000134287	0.382028	3.42593e-168	2.80964e-167	ARF3
ENSG00000143603	-0.381833	5.23592e-168	4.28809e-167	KCNN3
ENSG00000131067	0.381507	1.0596e-167	8.66583e-167	GGT7
ENSG00000182667	-0.381482	1.11789e-167	9.12995e-167	NTM
ENSG00000147421	-0.381055	2.81932e-167	2.2994e-166	HMBOX1
ENSG00000174748	0.380627	7.10547e-167	5.78714e-166	RPL15
ENSG00000170382	0.380444	1.05412e-166	8.57362e-166	LRRN2
ENSG00000148303	0.380398	1.16512e-166	9.46343e-166	RPL7A
ENSG00000166963	0.380211	1.74486e-166	1.41528e-165	MAP1A
ENSG00000106772	0.380169	1.90932e-166	1.54655e-165	PRUNE2
ENSG00000150907	-0.380059	2.41835e-166	1.95619e-165	FOXO1
ENSG00000146555	0.379356	1.09799e-165	8.86939e-165	SDK1
ENSG00000100142	0.378555	6.12484e-165	4.94082e-164	POLR2F
ENSG00000163453	-0.378321	1.01153e-164	8.14875e-164	IGFBP7
ENSG00000197329	0.378307	1.04251e-164	8.38688e-164	PELI1
ENSG00000163412	0.378238	1.20777e-164	9.70321e-164	EIF4E3
ENSG00000164089	-0.378194	1.32588e-164	1.06376e-163	ETNPPL
ENSG00000107362	0.378155	1.44294e-164	1.15611e-163	ABHD17B
ENSG00000136267	0.377659	4.16531e-164	3.33282e-163	DGKB
ENSG00000143195	0.377581	4.91868e-164	3.93029e-163	ILDR2
ENSG00000130338	0.377342	8.20055e-164	6.54384e-163	TULP4
ENSG00000170500	0.377106	1.35637e-163	1.08089e-162	LONRF2
ENSG00000163602	0.3768	2.60468e-163	2.07287e-162	RYBP
ENSG00000260916	0.376733	3.00552e-163	2.38866e-162	CCPG1
ENSG00000181804	-0.376731	3.01697e-163	2.39454e-162	SLC9A9
ENSG00000183722	-0.376404	6.04411e-163	4.79073e-162	LHFPL6
ENSG00000169398	0.376014	1.3851e-162	1.0964e-161	PTK2
ENSG00000134986	0.375865	1.90242e-162	1.50388e-161	NREP
ENSG00000169918	0.375824	2.07505e-162	1.63815e-161	OTUD7A
ENSG00000121964	0.375663	2.91952e-162	2.30175e-161	GTDC1
ENSG00000173660	0.375492	4.19603e-162	3.30374e-161	UQCRH
ENSG00000107957	0.375428	4.8047e-162	3.77795e-161	SH3PXD2A
ENSG00000105854	-0.375019	1.14342e-161	8.97884e-161	PON2
ENSG00000171843	0.374951	1.31842e-161	1.03393e-160	MLLT3
ENSG00000114948	0.37475	2.019e-161	1.58124e-160	ADAM23
ENSG00000240694	0.374696	2.262e-161	1.76921e-160	PNMA2
ENSG00000244274	0.374614	2.69105e-161	2.102e-160	DBNDD2
ENSG00000120265	0.37412	7.6389e-161	5.95621e-160	PCMT1
ENSG00000198363	-0.374119	7.64546e-161	5.95621e-160	ASPH
ENSG00000173611	0.373904	1.20418e-160	9.36888e-160	SCAI
ENSG00000287720	0.373648	2.06708e-160	1.60613e-159	AC023480.1
ENSG00000110436	-0.373644	2.08422e-160	1.61732e-159	SLC1A2
ENSG00000286863	0.373329	4.04058e-160	3.13132e-159	AL513166.1
ENSG00000110076	0.372813	1.19647e-159	9.2601e-159	NRXN2
ENSG00000218336	0.372787	1.26294e-159	9.7618e-159	TENM3
ENSG00000139793	0.372225	4.1028e-159	3.16708e-158	MBNL2
ENSG00000148158	0.372105	5.28396e-159	4.07354e-158	SNX30
ENSG00000123066	-0.371881	8.44649e-159	6.50314e-158	MED13L
ENSG00000086300	0.371613	1.47778e-158	1.1363e-157	SNX10
ENSG00000128805	0.371529	1.76342e-158	1.35417e-157	ARHGAP22
ENSG00000084453	0.371016	5.14212e-158	3.94362e-157	SLCO1A2
ENSG00000150656	0.370929	6.17577e-158	4.73023e-157	CNDP1
ENSG00000138756	-0.370848	7.29846e-158	5.5829e-157	BMP2K
ENSG00000101079	0.370527	1.42693e-157	1.09011e-156	NDRG3
ENSG00000234323	0.370434	1.73124e-157	1.32088e-156	LINC01505
ENSG00000121207	-0.370433	1.73358e-157	1.32096e-156	LRAT
ENSG00000168297	0.370156	3.08987e-157	2.3514e-156	PXK
ENSG00000133627	0.370071	3.68225e-157	2.7986e-156	ACTR3B
ENSG00000186960	0.370038	3.94309e-157	2.993e-156	LINC01551
ENSG00000143774	0.370026	4.04665e-157	3.06767e-156	GUK1
ENSG00000144959	0.369927	4.96872e-157	3.76185e-156	NCEH1
ENSG00000100316	0.369923	5.00896e-157	3.78746e-156	RPL3
ENSG00000168309	-0.369606	9.69298e-157	7.31987e-156	FAM107A
ENSG00000155970	0.36955	1.08711e-156	8.19909e-156	MICU3
ENSG00000058404	0.369316	1.76844e-156	1.33208e-155	CAMK2B
ENSG00000070214	0.369267	1.95618e-156	1.47162e-155	SLC44A1
ENSG00000220205	0.368751	5.70532e-156	4.28661e-155	VAMP2
ENSG00000171488	0.368525	9.10076e-156	6.82904e-155	LRRC8C
ENSG00000166402	0.368371	1.25219e-155	9.38428e-155	TUB
ENSG00000143761	0.367891	3.37083e-155	2.523e-154	ARF1
ENSG00000079691	-0.367753	4.48374e-155	3.35175e-154	CARMIL1
ENSG00000133026	0.367474	7.96712e-155	5.94818e-154	MYH10
ENSG00000005810	0.367219	1.34668e-154	1.00415e-153	MYCBP2
ENSG00000049323	-0.367026	2.00291e-154	1.49159e-153	LTBP1
ENSG00000122870	0.366966	2.26684e-154	1.68601e-153	BICC1
ENSG00000187147	0.366961	2.29201e-154	1.7026e-153	RNF220
ENSG00000090905	-0.366773	3.37357e-154	2.50288e-153	TNRC6A
ENSG00000006576	0.366725	3.72166e-154	2.75767e-153	PHTF2
ENSG00000124313	0.366551	5.32269e-154	3.93906e-153	IQSEC2
ENSG00000091129	-0.366399	7.26748e-154	5.37157e-153	NRCAM
ENSG00000133302	0.366242	1.00291e-153	7.40349e-153	SLF1
ENSG00000124145	-0.366102	1.33737e-153	9.86018e-153	SDC4
ENSG00000107282	0.365796	2.50152e-153	1.84203e-152	APBA1
ENSG00000231312	0.365628	3.53369e-153	2.59885e-152	MAP4K3-DT
ENSG00000260032	0.365208	8.33429e-153	6.12182e-152	NORAD
ENSG00000136870	0.365097	1.04669e-152	7.67876e-152	ZNF189
ENSG00000143036	-0.364752	2.11584e-152	1.55031e-151	SLC44A3
ENSG00000152219	0.364736	2.18608e-152	1.59979e-151	ARL14EP
ENSG00000169946	0.36449	3.6144e-152	2.64177e-151	ZFPM2
ENSG00000059588	0.364255	5.83073e-152	4.25643e-151	TARBP1
ENSG00000144909	-0.364162	7.04626e-152	5.13743e-151	OSBPL11
ENSG00000112769	-0.364027	9.27242e-152	6.75219e-151	LAMA4
ENSG00000114999	0.363696	1.82002e-151	1.32371e-150	TTL
ENSG00000163328	0.36327	4.3217e-151	3.13934e-150	GPR155
ENSG00000280870	0.363217	4.81515e-151	3.4935e-150	AC233296.1
ENSG00000156017	0.363133	5.70431e-151	4.13353e-150	CARNMT1
ENSG00000272168	0.36284	1.03312e-150	7.47718e-150	CASC15
ENSG00000169851	0.36281	1.09748e-150	7.93326e-150	PCDH7
ENSG00000154864	0.362757	1.22232e-150	8.82489e-150	PIEZO2
ENSG00000166780	0.362438	2.33414e-150	1.68314e-149	BMERB1
ENSG00000254787	0.362029	5.33844e-150	3.84485e-149	AP001825.1
ENSG00000182606	-0.361794	8.57438e-150	6.16792e-149	TRAK1
ENSG00000156411	0.361614	1.23295e-149	8.85839e-149	ATP5MPL
ENSG00000163682	0.361362	2.05114e-149	1.47189e-148	RPL9
ENSG00000104047	0.360836	5.91274e-149	4.23783e-148	DTWD1
ENSG00000237187	-0.360596	9.58083e-149	6.85853e-148	NR2F1-AS1
ENSG00000260807	0.360427	1.34655e-148	9.62775e-148	AC009041.2
ENSG00000104375	-0.360039	2.93578e-148	2.09653e-147	STK3
ENSG00000144908	-0.359841	4.36164e-148	3.11102e-147	ALDH1L1
ENSG00000147416	0.359631	6.64788e-148	4.73601e-147	ATP6V1B2
ENSG00000103034	0.359603	7.02996e-148	5.00218e-147	NDRG4
ENSG00000236548	0.359583	7.32243e-148	5.20403e-147	RNF217-AS1
ENSG00000198755	0.359359	1.14706e-147	8.14234e-147	RPL10A
ENSG00000164919	0.359275	1.3562e-147	9.61535e-147	COX6C
ENSG00000063177	0.359273	1.361e-147	9.63786e-147	RPL18
ENSG00000124496	0.359053	2.11583e-147	1.49652e-146	TRERF1
ENSG00000251136	-0.359018	2.26626e-147	1.601e-146	AF117829.1
ENSG00000138757	0.358724	4.07964e-147	2.87863e-146	G3BP2
ENSG00000161203	0.358642	4.80942e-147	3.38952e-146	AP2M1
ENSG00000066651	0.35796	1.87297e-146	1.31843e-145	TRMT11
ENSG00000109756	0.357822	2.46304e-146	1.73174e-145	RAPGEF2
ENSG00000144406	0.357813	2.51152e-146	1.76373e-145	UNC80
ENSG00000128536	-0.357608	3.77013e-146	2.64446e-145	CDHR3
ENSG00000158321	0.357049	1.14598e-145	8.02868e-145	AUTS2
ENSG00000116191	0.356625	2.65559e-145	1.85828e-144	RALGPS2
ENSG00000274020	-0.356588	2.862e-145	2.00036e-144	LINC01138
ENSG00000165521	0.356233	5.77778e-145	4.03353e-144	EML5
ENSG00000161970	0.356185	6.35023e-145	4.42793e-144	RPL26
ENSG00000154122	0.355953	1.00551e-144	7.00304e-144	ANKH
ENSG00000178385	0.355935	1.04183e-144	7.24744e-144	PLEKHM3
ENSG00000169085	0.355568	2.15073e-144	1.49439e-143	VXN
ENSG00000130414	0.355539	2.27901e-144	1.58167e-143	NDUFA10
ENSG00000105223	0.355535	2.29387e-144	1.59011e-143	PLD3
ENSG00000197050	0.355441	2.76205e-144	1.91241e-143	ZNF420
ENSG00000066032	-0.355406	2.95793e-144	2.04564e-143	CTNNA2
ENSG00000135821	-0.355316	3.53593e-144	2.44252e-143	GLUL
ENSG00000185842	0.355197	4.47198e-144	3.08551e-143	DNAH14
ENSG00000091513	0.355192	4.51311e-144	3.11026e-143	TF
ENSG00000149090	-0.355031	6.20199e-144	4.2692e-143	PAMR1
ENSG00000235538	-0.355019	6.35446e-144	4.36906e-143	AL078602.1
ENSG00000204442	0.354782	1.01336e-143	6.95938e-143	FAM155A
ENSG00000196935	-0.354457	1.91818e-143	1.3158e-142	SRGAP1
ENSG00000196937	0.354398	2.15523e-143	1.47669e-142	FAM3C
ENSG00000143947	0.354258	2.8407e-143	1.9441e-142	RPS27A
ENSG00000184277	0.353918	5.53221e-143	3.78173e-142	TM2D3
ENSG00000120549	0.35362	9.93641e-143	6.78453e-142	KIAA1217
ENSG00000187605	0.353393	1.54866e-142	1.0562e-141	TET3
ENSG00000107331	0.353313	1.81272e-142	1.23486e-141	ABCA2
ENSG00000046889	-0.352964	3.58946e-142	2.4424e-141	PREX2
ENSG00000130203	-0.352938	3.77567e-142	2.56615e-141	APOE
ENSG00000265681	0.35287	4.3156e-142	2.92976e-141	RPL17
ENSG00000088538	0.352765	5.29234e-142	3.58872e-141	DOCK3
ENSG00000237877	-0.352667	6.40777e-142	4.34011e-141	LINC01473
ENSG00000113595	0.352575	7.68157e-142	5.19692e-141	TRIM23
ENSG00000164949	-0.352495	8.96677e-142	6.05948e-141	GEM
ENSG00000178662	0.351987	2.41719e-141	1.6316e-140	CSRNP3
ENSG00000137198	-0.351945	2.62396e-141	1.76915e-140	GMPR
ENSG00000134308	0.351742	3.89493e-141	2.62309e-140	YWHAQ
ENSG00000164188	-0.351638	4.76866e-141	3.20786e-140	RANBP3L
ENSG00000168904	0.351446	6.9292e-141	4.65595e-140	LRRC28
ENSG00000240972	0.351437	7.05357e-141	4.73414e-140	MIF
ENSG00000104059	0.351323	8.80997e-141	5.90628e-140	FAM189A1
ENSG00000132613	-0.351244	1.02699e-140	6.87722e-140	MTSS2
ENSG00000034510	0.350827	2.30742e-140	1.54342e-139	TMSB10
ENSG00000075539	0.350782	2.51651e-140	1.68137e-139	FRYL
ENSG00000110955	0.350479	4.53075e-140	3.02374e-139	ATP5F1B
ENSG00000163110	-0.350472	4.59618e-140	3.06394e-139	PDLIM5
ENSG00000112531	-0.35044	4.88464e-140	3.25258e-139	QKI
ENSG00000170775	0.350294	6.48954e-140	4.31639e-139	GPR37
ENSG00000114784	0.350167	8.29024e-140	5.50789e-139	EIF1B
ENSG00000189367	0.349921	1.33437e-139	8.85533e-139	KIAA0408
ENSG00000145425	0.349562	2.67472e-139	1.77305e-138	RPS3A
ENSG00000135049	0.349558	2.69207e-139	1.78256e-138	AGTPBP1
ENSG00000153561	0.34946	3.25414e-139	2.15232e-138	RMND5A
ENSG00000120256	0.349325	4.22744e-139	2.79294e-138	LRP11
ENSG00000249853	0.34925	4.87925e-139	3.21998e-138	HS3ST5
ENSG00000148541	0.349062	7.01235e-139	4.62252e-138	FAM13C
ENSG00000073464	0.348971	8.36605e-139	5.50873e-138	CLCN4
ENSG00000134265	0.348874	1.00722e-138	6.62478e-138	NAPG
ENSG00000170899	0.348651	1.54792e-138	1.01699e-137	GSTA4
ENSG00000227110	-0.348204	3.65959e-138	2.40168e-137	LMCD1-AS1
ENSG00000135823	0.348152	4.04786e-138	2.65354e-137	STX6
ENSG00000141542	0.348103	4.44614e-138	2.91141e-137	RAB40B
ENSG00000151929	-0.348095	4.50999e-138	2.94995e-137	BAG3
ENSG00000100077	0.347989	5.53213e-138	3.61453e-137	GRK3
ENSG00000107104	-0.347956	5.89529e-138	3.84756e-137	KANK1
ENSG00000198797	0.347757	8.63351e-138	5.62844e-137	BRINP2
ENSG00000112695	0.347643	1.07499e-137	7.00048e-137	COX7A2
ENSG00000169032	0.347514	1.37713e-137	8.95818e-137	MAP2K1
ENSG00000091844	0.347467	1.50718e-137	9.79333e-137	RGS17
ENSG00000148175	-0.34697	3.9001e-137	2.53142e-136	STOM
ENSG00000170113	0.346969	3.91166e-137	2.53615e-136	NIPA1
ENSG00000189319	0.346796	5.44239e-137	3.52474e-136	FAM53B
ENSG00000068366	0.346274	1.47512e-136	9.54309e-136	ACSL4
ENSG00000161267	0.346227	1.61563e-136	1.04407e-135	BDH1
ENSG00000197381	0.346039	2.30994e-136	1.49112e-135	ADARB1
ENSG00000110514	0.345705	4.37078e-136	2.81837e-135	MADD
ENSG00000153130	0.345585	5.48851e-136	3.53525e-135	SCOC
ENSG00000185737	-0.345543	5.94113e-136	3.82262e-135	NRG3
ENSG00000250305	0.345413	7.61732e-136	4.89578e-135	TRMT9B
ENSG00000151468	0.345225	1.08805e-135	6.98549e-135	CCDC3
ENSG00000116030	0.345216	1.10825e-135	7.10746e-135	SUMO1
ENSG00000196950	0.344973	1.75905e-135	1.12689e-134	SLC39A10
ENSG00000103657	0.344969	1.77173e-135	1.13379e-134	HERC1
ENSG00000273748	0.344522	4.13995e-135	2.64643e-134	AL592183.1
ENSG00000118263	-0.344384	5.37268e-135	3.43074e-134	KLF7
ENSG00000102226	0.344247	6.9718e-135	4.4468e-134	USP11
ENSG00000128609	0.344246	6.9789e-135	4.4468e-134	NDUFA5
ENSG00000171603	0.34408	9.56277e-135	6.08661e-134	CLSTN1
ENSG00000116793	0.34401	1.09203e-134	6.9432e-134	PHTF1
ENSG00000160445	0.343889	1.37283e-134	8.71919e-134	ZER1
ENSG00000123505	0.343886	1.37976e-134	8.75377e-134	AMD1
ENSG00000138190	0.343822	1.55687e-134	9.86687e-134	EXOC6
ENSG00000122873	0.343263	4.4791e-134	2.83565e-133	CISD1
ENSG00000073712	-0.343068	6.47789e-134	4.09666e-133	FERMT2
ENSG00000183570	0.342979	7.66259e-134	4.84069e-133	PCBP3
ENSG00000011201	-0.34279	1.09242e-133	6.89379e-133	ANOS1
ENSG00000231160	0.342713	1.26367e-133	7.96596e-133	KLF3-AS1
ENSG00000155111	0.34262	1.50672e-133	9.48799e-133	CDK19
ENSG00000109339	-0.342379	2.37191e-133	1.49203e-132	MAPK10
ENSG00000127249	-0.341968	5.13047e-133	3.22386e-132	ATP13A4
ENSG00000174444	0.341925	5.56734e-133	3.49466e-132	RPL4
ENSG00000109670	0.341762	7.55266e-133	4.73583e-132	FBXW7
ENSG00000117410	0.341731	8.01125e-133	5.01806e-132	ATP6V0B
ENSG00000170315	0.341341	1.66642e-132	1.0427e-131	UBB
ENSG00000167123	0.341259	1.94246e-132	1.21414e-131	CERCAM
ENSG00000129625	0.341225	2.06753e-132	1.29095e-131	REEP5
ENSG00000188803	0.341046	2.89449e-132	1.80539e-131	SHISA6
ENSG00000138439	0.340812	4.48557e-132	2.79486e-131	FAM117B
ENSG00000100442	0.340685	5.6822e-132	3.53672e-131	FKBP3
ENSG00000154518	0.340358	1.0481e-131	6.51675e-131	ATP5MC3
ENSG00000164615	0.340124	1.62288e-131	1.00799e-130	CAMLG
ENSG00000102362	-0.339435	5.85987e-131	3.63582e-130	SYTL4
ENSG00000100592	-0.339318	7.28141e-131	4.5131e-130	DAAM1
ENSG00000132434	0.339314	7.33493e-131	4.54151e-130	LANCL2
ENSG00000185418	0.339149	9.97214e-131	6.16791e-130	TARSL2
ENSG00000069966	0.33905	1.19917e-130	7.4093e-130	GNB5
ENSG00000161048	0.338774	2.00256e-130	1.23603e-129	NAPEPLD
ENSG00000173175	0.338766	2.02998e-130	1.25164e-129	ADCY5
ENSG00000156642	0.338708	2.26053e-130	1.39235e-129	NPTN
ENSG00000101846	0.338694	2.32234e-130	1.42893e-129	STS
ENSG00000148700	-0.338587	2.8317e-130	1.74052e-129	ADD3
ENSG00000006831	0.338502	3.31738e-130	2.03693e-129	ADIPOR2
ENSG00000101040	0.33819	5.90644e-130	3.6229e-129	ZMYND8
ENSG00000117318	-0.337839	1.1321e-129	6.93688e-129	ID3
ENSG00000228624	0.337818	1.17626e-129	7.20001e-129	HDAC2-AS2
ENSG00000151366	0.33779	1.23886e-129	7.57539e-129	NDUFC2
ENSG00000102900	0.337745	1.34679e-129	8.2268e-129	NUP93
ENSG00000182389	0.337144	4.09237e-129	2.49723e-128	CACNB4
ENSG00000128989	0.336944	5.91933e-129	3.60835e-128	ARPP19
ENSG00000112851	-0.336837	7.20579e-129	4.38804e-128	ERBIN
ENSG00000164985	0.336678	9.65977e-129	5.87636e-128	PSIP1
ENSG00000185246	0.336665	9.89794e-129	6.01506e-128	PRPF39
ENSG00000164187	0.336553	1.21506e-128	7.37642e-128	LMBRD2
ENSG00000173077	-0.336487	1.37149e-128	8.31758e-128	DEC1
ENSG00000151743	0.336446	1.47913e-128	8.96119e-128	AMN1
ENSG00000115652	0.336196	2.34379e-128	1.41851e-127	UXS1
ENSG00000088808	0.336076	2.92121e-128	1.76616e-127	PPP1R13B
ENSG00000111615	0.335846	4.46079e-128	2.69424e-127	KRR1
ENSG00000141338	0.335445	9.31635e-128	5.62118e-127	ABCA8
ENSG00000162946	0.335348	1.11337e-127	6.71083e-127	DISC1
ENSG00000166619	0.33528	1.25955e-127	7.58427e-127	BLCAP
ENSG00000147324	-0.335114	1.70772e-127	1.02724e-126	MFHAS1
ENSG00000136141	0.335082	1.81293e-127	1.08941e-126	LRCH1
ENSG00000152217	0.334672	3.83891e-127	2.30451e-126	SETBP1
ENSG00000087338	0.3345	5.25295e-127	3.15017e-126	GMCL1
ENSG00000239268	-0.334386	6.47117e-127	3.8768e-126	AC092691.1
ENSG00000149313	0.33437	6.66473e-127	3.98872e-126	AASDHPPT
ENSG00000198478	0.334355	6.84655e-127	4.09339e-126	SH3BGRL2
ENSG00000155744	0.334157	9.82276e-127	5.86687e-126	FAM126B
ENSG00000128016	-0.334034	1.22999e-126	7.33898e-126	ZFP36
ENSG00000156531	0.333749	2.06637e-126	1.2317e-125	PHF6
ENSG00000144815	0.33365	2.47819e-126	1.47569e-125	NXPE3
ENSG00000134490	0.333505	3.22512e-126	1.91853e-125	TMEM241
ENSG00000165259	0.333451	3.56014e-126	2.11569e-125	HDX
ENSG00000166313	0.3334	3.9085e-126	2.32037e-125	APBB1
ENSG00000233067	-0.333339	4.36431e-126	2.58838e-125	PTCHD1-AS
ENSG00000131143	0.333221	5.40699e-126	3.20356e-125	COX4I1
ENSG00000172264	0.333031	7.63736e-126	4.52049e-125	MACROD2
ENSG00000168028	0.333018	7.82782e-126	4.62859e-125	RPSA
ENSG00000064655	-0.332969	8.55197e-126	5.05173e-125	EYA2
ENSG00000229852	0.332793	1.17687e-125	6.94497e-125	AC019205.1
ENSG00000182504	0.332789	1.18623e-125	6.9932e-125	CEP97
ENSG00000138686	0.331967	5.26191e-125	3.09897e-124	BBS7
ENSG00000106624	-0.33175	7.80082e-125	4.58968e-124	AEBP1
ENSG00000150593	0.331701	8.51811e-125	5.00672e-124	PDCD4
ENSG00000214253	0.331408	1.44492e-124	8.48444e-124	FIS1
ENSG00000152061	0.331121	2.42917e-124	1.42497e-123	RABGAP1L
ENSG00000126861	0.330721	4.99668e-124	2.92818e-123	OMG
ENSG00000164715	0.330443	8.23707e-124	4.82235e-123	LMTK2
ENSG00000185052	0.330311	1.04465e-123	6.10982e-123	SLC24A3
ENSG00000135749	0.329764	2.79221e-123	1.63146e-122	PCNX2
ENSG00000145623	-0.329455	4.85767e-123	2.83548e-122	OSMR
ENSG00000224905	0.329236	7.19322e-123	4.19463e-122	AP001347.1
ENSG00000143155	0.329122	8.83649e-123	5.1478e-122	TIPRL
ENSG00000182768	0.329111	9.0027e-123	5.23946e-122	NGRN
ENSG00000091409	-0.328402	3.19875e-122	1.8598e-121	ITGA6
ENSG00000198804	0.328375	3.35983e-122	1.95154e-121	MT-CO1
ENSG00000035687	0.328351	3.50682e-122	2.03492e-121	ADSS
ENSG00000164327	0.328246	4.22516e-122	2.44935e-121	RICTOR
ENSG00000114573	0.328104	5.45028e-122	3.15647e-121	ATP6V1A
ENSG00000139436	0.328084	5.64722e-122	3.26732e-121	GIT2
ENSG00000135108	0.32778	9.71351e-122	5.61447e-121	FBXO21
ENSG00000111666	-0.327765	9.96471e-122	5.75403e-121	CHPT1
ENSG00000122707	0.32745	1.74865e-121	1.00876e-120	RECK
ENSG00000198689	0.327279	2.36975e-121	1.36573e-120	SLC9A6
ENSG00000141232	-0.327178	2.83462e-121	1.63205e-120	TOB1
ENSG00000198420	0.327049	3.56445e-121	2.05025e-120	TCAF1
ENSG00000159200	0.326918	4.50158e-121	2.58677e-120	RCAN1
ENSG00000143549	0.326496	9.51502e-121	5.46236e-120	TPM3
ENSG00000115942	0.326386	1.15651e-120	6.63284e-120	ORC2
ENSG00000115762	0.326172	1.68853e-120	9.67466e-120	PLEKHB2
ENSG00000118518	0.326145	1.77363e-120	1.01524e-119	RNF146
ENSG00000118322	0.326141	1.78579e-120	1.02122e-119	ATP10B
ENSG00000198938	0.326126	1.83329e-120	1.04736e-119	MT-CO3
ENSG00000079785	0.326069	2.0294e-120	1.15829e-119	DDX1
ENSG00000188352	0.325916	2.65963e-120	1.51653e-119	FOCAD
ENSG00000147604	0.32581	3.20605e-120	1.82633e-119	RPL7
ENSG00000175265	0.325783	3.36561e-120	1.91538e-119	GOLGA8A
ENSG00000140479	0.325379	6.86542e-120	3.90339e-119	PCSK6
ENSG00000151131	0.325201	9.40444e-120	5.34183e-119	C12orf45
ENSG00000150510	0.325061	1.203e-119	6.82663e-119	FAM124A
ENSG00000122705	0.324897	1.60616e-119	9.10569e-119	CLTA
ENSG00000116991	0.32478	1.97688e-119	1.11966e-118	SIPA1L2
ENSG00000080815	0.324715	2.21408e-119	1.25281e-118	PSEN1
ENSG00000111052	0.324699	2.27838e-119	1.28796e-118	LIN7A
ENSG00000104331	0.324579	2.81563e-119	1.59014e-118	IMPAD1
ENSG00000149231	0.324577	2.82498e-119	1.5939e-118	CCDC82
ENSG00000118515	0.324376	4.02178e-119	2.267e-118	SGK1
ENSG00000188846	0.32417	5.77894e-119	3.25437e-118	RPL14
ENSG00000129151	-0.324162	5.85838e-119	3.29597e-118	BBOX1
ENSG00000184207	0.324143	6.06214e-119	3.40736e-118	PGP
ENSG00000145934	0.324093	6.61171e-119	3.71273e-118	TENM2
ENSG00000168653	0.323574	1.64553e-118	9.23149e-118	NDUFS5
ENSG00000109654	0.323262	2.84217e-118	1.59296e-117	TRIM2
ENSG00000026025	-0.322798	6.40764e-118	3.58792e-117	VIM
ENSG00000156467	0.322783	6.57718e-118	3.67936e-117	UQCRB
ENSG00000198513	0.322666	8.06072e-118	4.50501e-117	ATL1
ENSG00000124588	0.322605	8.97499e-118	5.01125e-117	NQO2
ENSG00000123200	0.322401	1.28142e-117	7.14815e-117	ZC3H13
ENSG00000170776	-0.322368	1.3566e-117	7.56038e-117	AKAP13
ENSG00000120694	0.322314	1.49179e-117	8.306e-117	HSPH1
ENSG00000105220	0.322272	1.6044e-117	8.92454e-117	GPI
ENSG00000165209	0.322197	1.82856e-117	1.01619e-116	STRBP
ENSG00000182175	-0.322196	1.83238e-117	1.01736e-116	RGMA
ENSG00000231999	0.322143	2.00875e-117	1.11424e-116	LRRC8C-DT
ENSG00000068745	0.322097	2.17696e-117	1.20641e-116	IP6K2
ENSG00000066382	0.32191	3.01824e-117	1.67105e-116	MPPED2
ENSG00000182220	0.321773	3.82963e-117	2.1183e-116	ATP6AP2
ENSG00000163541	0.321744	4.03208e-117	2.22819e-116	SUCLG1
ENSG00000142541	0.321702	4.33827e-117	2.39516e-116	RPL13A
ENSG00000135245	-0.321669	4.58937e-117	2.53143e-116	HILPDA
ENSG00000172493	-0.321587	5.30052e-117	2.92097e-116	AFF1
ENSG00000103363	0.321533	5.82277e-117	3.20578e-116	ELOB
ENSG00000203879	0.321397	7.36739e-117	4.05241e-116	GDI1
ENSG00000173436	0.32129	8.88516e-117	4.88271e-116	MICOS10
ENSG00000113966	0.321254	9.44793e-117	5.18715e-116	ARL6
ENSG00000157445	0.321129	1.1744e-116	6.44176e-116	CACNA2D3
ENSG00000156261	0.321096	1.24507e-116	6.82305e-116	CCT8
ENSG00000147588	-0.321026	1.40372e-116	7.68536e-116	PMP2
ENSG00000256771	0.320984	1.51033e-116	8.26143e-116	ZNF253
ENSG00000173786	0.320954	1.59164e-116	8.69813e-116	CNP
ENSG00000141431	0.320908	1.72433e-116	9.41455e-116	ASXL3
ENSG00000166762	0.320737	2.32134e-116	1.26624e-115	CATSPER2
ENSG00000197892	0.320628	2.80288e-116	1.52751e-115	KIF13B
ENSG00000148219	-0.32059	2.99443e-116	1.63039e-115	ASTN2
ENSG00000144857	-0.320581	3.04228e-116	1.65492e-115	BOC
ENSG00000138593	0.320479	3.63081e-116	1.97325e-115	SECISBP2L
ENSG00000048028	0.320123	6.72789e-116	3.65307e-115	USP28
ENSG00000080845	0.319765	1.24851e-115	6.77288e-115	DLGAP4
ENSG00000131584	0.319731	1.32457e-115	7.17893e-115	ACAP3
ENSG00000065548	0.319559	1.78222e-115	9.65041e-115	ZC3H15
ENSG00000089053	0.319416	2.28303e-115	1.23509e-114	ANAPC5
ENSG00000154144	0.319332	2.63735e-115	1.42547e-114	TBRG1
ENSG00000183762	-0.319317	2.70886e-115	1.46278e-114	KREMEN1
ENSG00000144668	0.319294	2.8178e-115	1.52022e-114	ITGA9
ENSG00000229739	0.319239	3.09663e-115	1.66913e-114	AL096803.2
ENSG00000129128	0.319209	3.26123e-115	1.75625e-114	SPCS3
ENSG00000135940	0.3191	3.93511e-115	2.11723e-114	COX5B
ENSG00000165895	-0.318951	5.09035e-115	2.73629e-114	ARHGAP42
ENSG00000231500	0.318894	5.61497e-115	3.01556e-114	RPS18
ENSG00000104381	0.318633	8.80641e-115	4.72526e-114	GDAP1
ENSG00000103740	-0.318628	8.88043e-115	4.76065e-114	ACSBG1
ENSG00000162869	0.318499	1.10876e-114	5.93849e-114	PPP1R21
ENSG00000188312	0.318495	1.11562e-114	5.96985e-114	CENPP
ENSG00000151778	0.318274	1.6328e-114	8.72944e-114	SERP2
ENSG00000144711	0.318224	1.7785e-114	9.49977e-114	IQSEC1
ENSG00000113161	0.318215	1.80699e-114	9.64328e-114	HMGCR
ENSG00000165813	0.31818	1.91812e-114	1.02271e-113	CCDC186
ENSG00000167283	0.318152	2.01332e-114	1.0725e-113	ATP5MG
ENSG00000286695	-0.317932	2.93546e-114	1.56232e-113	AC026316.5
ENSG00000083312	0.317626	4.95867e-114	2.63675e-113	TNPO1
ENSG00000115380	-0.317436	6.86833e-114	3.64892e-113	EFEMP1
ENSG00000162409	0.317019	1.40387e-113	7.45162e-113	PRKAA2
ENSG00000110427	0.316642	2.67344e-113	1.41776e-112	KIAA1549L
ENSG00000075151	0.316621	2.77088e-113	1.46812e-112	EIF4G3
ENSG00000111669	0.316164	6.03745e-113	3.19601e-112	TPI1
ENSG00000173933	0.315821	1.08279e-112	5.72678e-112	RBM4
ENSG00000100207	0.315641	1.47244e-112	7.78066e-112	TCF20
ENSG00000092964	-0.31555	1.71855e-112	9.07304e-112	DPYSL2
ENSG00000183049	0.315534	1.7647e-112	9.30834e-112	CAMK1D
ENSG00000148925	0.315524	1.79743e-112	9.47253e-112	BTBD10
ENSG00000131409	0.315154	3.36732e-112	1.77301e-111	LRRC4B
ENSG00000250075	0.314894	5.23848e-112	2.7558e-111	AC104806.2
ENSG00000142168	0.31481	6.0338e-112	3.17137e-111	SOD1
ENSG00000105737	0.314681	7.50893e-112	3.94319e-111	GRIK5
ENSG00000153814	0.314651	7.90301e-112	4.14645e-111	JAZF1
ENSG00000050748	0.314618	8.36739e-112	4.38621e-111	MAPK9
ENSG00000179833	0.31453	9.70584e-112	5.08332e-111	SERTAD2
ENSG00000139173	0.314344	1.3307e-111	6.96321e-111	TMEM117
ENSG00000043514	0.314306	1.41723e-111	7.40944e-111	TRIT1
ENSG00000142892	0.314257	1.54079e-111	8.04832e-111	PIGK
ENSG00000180817	0.314205	1.68373e-111	8.78721e-111	PPA1
ENSG00000134851	0.314152	1.83929e-111	9.59061e-111	TMEM165
ENSG00000109971	0.314148	1.85297e-111	9.65342e-111	HSPA8
ENSG00000179399	-0.313916	2.74339e-111	1.42796e-110	GPC5
ENSG00000027001	0.313724	3.79237e-111	1.97223e-110	MIPEP
ENSG00000205213	-0.313519	5.36644e-111	2.78838e-110	LGR4
ENSG00000164587	0.313309	7.64308e-111	3.96782e-110	RPS14
ENSG00000106078	0.313169	9.67002e-111	5.01569e-110	COBL
ENSG00000010322	0.31315	9.99328e-111	5.17881e-110	NISCH
ENSG00000111775	0.313063	1.15588e-110	5.98487e-110	COX6A1
ENSG00000196361	0.313008	1.2699e-110	6.56948e-110	ELAVL3
ENSG00000070950	0.312909	1.50018e-110	7.75398e-110	RAD18
ENSG00000084676	-0.312858	1.63488e-110	8.44285e-110	NCOA1
ENSG00000246922	0.312805	1.78686e-110	9.21966e-110	UBAP1L
ENSG00000157216	0.312418	3.42449e-110	1.76539e-109	SSBP3
ENSG00000166839	-0.312353	3.82075e-110	1.96795e-109	ANKDD1A
ENSG00000267575	0.311994	6.97217e-110	3.58803e-109	AC006504.5
ENSG00000158987	0.311887	8.34475e-110	4.29065e-109	RAPGEF6
ENSG00000198712	0.311645	1.25264e-109	6.43513e-109	MT-CO2
ENSG00000197442	-0.311001	3.68038e-109	1.88907e-108	MAP3K5
ENSG00000146433	0.310897	4.38007e-109	2.24626e-108	TMEM181
ENSG00000041515	0.310743	5.65568e-109	2.89792e-108	MYO16
ENSG00000105568	0.310722	5.86545e-109	3.00281e-108	PPP2R1A
ENSG00000115561	0.310713	5.95479e-109	3.04591e-108	CHMP3
ENSG00000089220	0.310509	8.3593e-109	4.27213e-108	PEBP1
ENSG00000162601	0.310499	8.50966e-109	4.34522e-108	MYSM1
ENSG00000164221	0.31029	1.20448e-108	6.14502e-108	CCDC112
ENSG00000260664	0.310281	1.22221e-108	6.23013e-108	AC004158.1
ENSG00000105640	0.309881	2.38259e-108	1.21346e-107	RPL18A
ENSG00000165138	0.309709	3.17168e-108	1.61396e-107	ANKS6
ENSG00000178467	0.30969	3.26819e-108	1.66164e-107	P4HTM
ENSG00000114770	0.309561	4.05623e-108	2.06052e-107	ABCC5
ENSG00000123562	0.309347	5.7873e-108	2.93736e-107	MORF4L2
ENSG00000154305	0.309342	5.83529e-108	2.95918e-107	MIA3
ENSG00000148672	-0.309327	5.97708e-108	3.02849e-107	GLUD1
ENSG00000166848	0.309265	6.62401e-108	3.3534e-107	TERF2IP
ENSG00000155792	0.30925	6.79771e-108	3.4384e-107	DEPTOR
ENSG00000121766	0.309198	7.40224e-108	3.74098e-107	ZCCHC17
ENSG00000123349	0.308971	1.07888e-107	5.44785e-107	PFDN5
ENSG00000188612	0.308832	1.3594e-107	6.85848e-107	SUMO2
ENSG00000112282	0.308819	1.38921e-107	7.00288e-107	MED23
ENSG00000281392	0.308805	1.42086e-107	7.15635e-107	AC107204.1
ENSG00000164815	0.308657	1.81509e-107	9.13415e-107	ORC5
ENSG00000026103	-0.308563	2.12169e-107	1.0668e-106	FAS
ENSG00000107938	0.308377	2.88635e-107	1.45004e-106	EDRF1
ENSG00000147162	0.308352	3.00772e-107	1.50973e-106	OGT
ENSG00000138399	0.308279	3.39188e-107	1.70112e-106	FASTKD1
ENSG00000255302	0.308268	3.45808e-107	1.73285e-106	EID1
ENSG00000173114	0.308254	3.53704e-107	1.77091e-106	LRRN3
ENSG00000271147	0.308245	3.58939e-107	1.7956e-106	ARMCX5-GPRASP2
ENSG00000128487	0.308194	3.9045e-107	1.95159e-106	SPECC1
ENSG00000061918	0.308193	3.91421e-107	1.95479e-106	GUCY1B1
ENSG00000105426	0.308164	4.10549e-107	2.04859e-106	PTPRS
ENSG00000186010	0.307909	6.24946e-107	3.11577e-106	NDUFA13
ENSG00000104231	0.307796	7.53799e-107	3.75502e-106	ZFAND1
ENSG00000152284	-0.307745	8.193e-107	4.07788e-106	TCF7L1
ENSG00000206561	0.307736	8.3207e-107	4.13796e-106	COLQ
ENSG00000186020	0.307597	1.04686e-106	5.20176e-106	ZNF529
ENSG00000138071	0.307412	1.41932e-106	7.04653e-106	ACTR2
ENSG00000164163	0.307376	1.5065e-106	7.47308e-106	ABCE1
ENSG00000167635	0.307359	1.54908e-106	7.67787e-106	ZNF146
ENSG00000196220	0.307143	2.20953e-106	1.09422e-105	SRGAP3
ENSG00000205542	0.307132	2.2507e-106	1.11367e-105	TMSB4X
ENSG00000196782	0.307058	2.54243e-106	1.25697e-105	MAML3
ENSG00000196357	0.307023	2.69203e-106	1.32982e-105	ZNF565
ENSG00000168734	0.306883	3.38885e-106	1.67264e-105	PKIG
ENSG00000164070	0.306736	4.31938e-106	2.13015e-105	HSPA4L
ENSG00000116750	0.306733	4.33942e-106	2.13825e-105	UCHL5
ENSG00000243678	0.306638	5.0752e-106	2.49872e-105	NME2
ENSG00000182771	0.306405	7.43612e-106	3.65805e-105	GRID1
ENSG00000131100	0.306397	7.53289e-106	3.70257e-105	ATP6V1E1
ENSG00000083845	0.306357	8.04636e-106	3.95167e-105	RPS5
ENSG00000138385	0.306345	8.20102e-106	4.02428e-105	SSB
ENSG00000141441	-0.306287	9.02447e-106	4.42469e-105	GAREM1
ENSG00000107130	0.306245	9.6702e-106	4.73736e-105	NCS1
ENSG00000196323	0.306171	1.09193e-105	5.34486e-105	ZBTB44
ENSG00000169139	0.306056	1.31893e-105	6.45066e-105	UBE2V2
ENSG00000080493	-0.305976	1.50249e-105	7.34231e-105	SLC4A4
ENSG00000108107	0.30591	1.67396e-105	8.17354e-105	RPL28
ENSG00000266028	0.305889	1.73336e-105	8.45655e-105	SRGAP2
ENSG00000198843	0.305823	1.93183e-105	9.4171e-105	SELENOT
ENSG00000164347	0.305774	2.09289e-105	1.01938e-104	GFM2
ENSG00000090266	0.305761	2.13722e-105	1.04011e-104	NDUFB2
ENSG00000060138	-0.305751	2.17289e-105	1.0566e-104	YBX3
ENSG00000134369	-0.305626	2.66568e-105	1.29516e-104	NAV1
ENSG00000089737	0.305607	2.7493e-105	1.3347e-104	DDX24
ENSG00000185736	0.30559	2.82516e-105	1.3704e-104	ADARB2
ENSG00000122406	0.3055	3.27313e-105	1.58639e-104	RPL5
ENSG00000023516	0.305495	3.30463e-105	1.60035e-104	AKAP11
ENSG00000163001	0.305469	3.4465e-105	1.66769e-104	CFAP36
ENSG00000108946	0.305466	3.46306e-105	1.67433e-104	PRKAR1A
ENSG00000135250	0.305272	4.75272e-105	2.29598e-104	SRPK2
ENSG00000142611	-0.30513	5.994e-105	2.89327e-104	PRDM16
ENSG00000139505	0.305074	6.56959e-105	3.16595e-104	MTMR6
ENSG00000136521	0.305074	6.56962e-105	3.16595e-104	NDUFB5
ENSG00000152082	0.305052	6.80823e-105	3.27826e-104	MZT2B
ENSG00000162852	0.305034	7.01526e-105	3.3752e-104	CNST
ENSG00000177885	0.305018	7.19497e-105	3.45885e-104	GRB2
ENSG00000213585	0.304978	7.68556e-105	3.69169e-104	VDAC1
ENSG00000075415	0.304968	7.80756e-105	3.74725e-104	SLC25A3
ENSG00000168610	-0.304797	1.03189e-104	4.94853e-104	STAT3
ENSG00000152234	0.304599	1.42669e-104	6.83634e-104	ATP5F1A
ENSG00000013297	0.304415	1.9249e-104	9.21614e-104	CLDN11
ENSG00000125629	0.304406	1.95335e-104	9.34477e-104	INSIG2
ENSG00000064115	0.304336	2.18687e-104	1.04535e-103	TM7SF3
ENSG00000131437	0.304135	3.03238e-104	1.44834e-103	KIF3A
ENSG00000172757	0.304078	3.3317e-104	1.59002e-103	CFL1
ENSG00000134824	-0.304053	3.47031e-104	1.65483e-103	FADS2
ENSG00000145284	-0.304027	3.61496e-104	1.72242e-103	SCD5
ENSG00000106524	0.303734	5.82013e-104	2.77089e-103	ANKMY2
ENSG00000196498	0.303726	5.89532e-104	2.80443e-103	NCOR2
ENSG00000143850	0.303616	7.05697e-104	3.35433e-103	PLEKHA6
ENSG00000118246	0.303563	7.68097e-104	3.648e-103	FASTKD2
ENSG00000071242	-0.303544	7.92725e-104	3.76194e-103	RPS6KA2
ENSG00000237638	0.303398	1.00456e-103	4.76339e-103	LINC02245
ENSG00000197045	0.303371	1.05038e-103	4.97667e-103	GMFB
ENSG00000144161	0.303089	1.65891e-103	7.8536e-103	ZC3H8
ENSG00000197728	0.303029	1.82739e-103	8.64427e-103	RPS26
ENSG00000148935	0.30291	2.21512e-103	1.047e-102	GAS2
ENSG00000096063	0.302874	2.34644e-103	1.10818e-102	SRPK1
ENSG00000087299	0.302819	2.565e-103	1.21044e-102	L2HGDH
ENSG00000198791	0.302407	4.99841e-103	2.3569e-102	CNOT7
ENSG00000227051	0.302367	5.3319e-103	2.51215e-102	C14orf132
ENSG00000153904	-0.302338	5.58912e-103	2.63125e-102	DDAH1
ENSG00000188811	0.302252	6.41347e-103	3.01693e-102	NHLRC3
ENSG00000104904	0.302191	7.08809e-103	3.33163e-102	OAZ1
ENSG00000182774	0.302188	7.1219e-103	3.34486e-102	RPS17
ENSG00000113597	0.302174	7.28474e-103	3.41863e-102	TRAPPC13
ENSG00000125247	0.302162	7.42043e-103	3.47954e-102	TMTC4
ENSG00000164114	0.302129	7.83021e-103	3.66878e-102	MAP9
ENSG00000172380	-0.302078	8.5036e-103	3.98114e-102	GNG12
ENSG00000167526	0.302021	9.31839e-103	4.35915e-102	RPL13
ENSG00000137285	-0.302017	9.37694e-103	4.38307e-102	TUBB2B
ENSG00000235903	0.301868	1.19171e-102	5.56603e-102	CPB2-AS1
ENSG00000113851	0.301867	1.19491e-102	5.57657e-102	CRBN
ENSG00000167772	-0.301697	1.57194e-102	7.33033e-102	ANGPTL4
ENSG00000112339	0.301416	2.46906e-102	1.15048e-101	HBS1L
ENSG00000163864	0.301389	2.57947e-102	1.20098e-101	NMNAT3
ENSG00000114315	-0.301218	3.39388e-102	1.57892e-101	HES1
ENSG00000126602	0.301209	3.44429e-102	1.60111e-101	TRAP1
ENSG00000073060	0.301203	3.48143e-102	1.6171e-101	SCARB1
ENSG00000178980	0.301176	3.63395e-102	1.68662e-101	SELENOW
ENSG00000065559	0.301095	4.14033e-102	1.92014e-101	MAP2K4
ENSG00000136052	0.300885	5.80236e-102	2.68882e-101	SLC41A2
ENSG00000175395	0.300546	9.99248e-102	4.6269e-101	ZNF25
ENSG00000139112	0.300544	1.00198e-101	4.63591e-101	GABARAPL1
ENSG00000197170	0.300376	1.31168e-101	6.06411e-101	PSMD12
ENSG00000135698	0.300346	1.3775e-101	6.36341e-101	MPHOSPH6
ENSG00000113312	0.300128	1.95264e-101	9.01324e-101	TTC1
ENSG00000196814	0.300111	2.00711e-101	9.25745e-101	MVB12B
ENSG00000115875	0.299957	2.56697e-101	1.18305e-100	SRSF7
ENSG00000136146	0.299618	4.41659e-101	2.0339e-100	MED4
ENSG00000166200	0.299418	6.07206e-101	2.79409e-100	COPS2
ENSG00000178741	0.299373	6.52523e-101	3.00029e-100	COX5A
ENSG00000092847	0.299362	6.64273e-101	3.05194e-100	AGO1
ENSG00000175931	0.299301	7.32345e-101	3.36208e-100	UBE2O
ENSG00000178127	0.299151	9.30192e-101	4.26705e-100	NDUFV2
ENSG00000219200	0.29914	9.46672e-101	4.33928e-100	RNASEK
ENSG00000127124	0.299105	1.00094e-100	4.5845e-100	HIVEP3
ENSG00000047648	0.299064	1.06935e-100	4.89401e-100	ARHGAP6
ENSG00000134440	0.298795	1.6418e-100	7.50811e-100	NARS
ENSG00000134897	0.29871	1.8774e-100	8.57887e-100	BIVM
ENSG00000147650	0.298385	3.15046e-100	1.43851e-99	LRP12
ENSG00000143179	0.298343	3.36728e-100	1.53632e-99	UCK2
ENSG00000151835	0.298325	3.4646e-100	1.5795e-99	SACS
ENSG00000119139	-0.298323	3.47592e-100	1.58344e-99	TJP2
ENSG00000134686	0.298238	3.98117e-100	1.81221e-99	PHC2
ENSG00000146938	0.298176	4.38783e-100	1.99579e-99	NLGN4X
ENSG00000165355	0.298131	4.71485e-100	2.14288e-99	FBXO33
ENSG00000126267	0.298022	5.60576e-100	2.54584e-99	COX6B1
ENSG00000085365	0.297939	6.39553e-100	2.90229e-99	SCAMP1
ENSG00000143889	0.297781	8.22156e-100	3.72807e-99	HNRNPLL
ENSG00000253719	0.297577	1.1352e-99	5.14365e-99	ATXN7L3B
ENSG00000124535	0.297567	1.15377e-99	5.22377e-99	WRNIP1
ENSG00000078098	-0.297512	1.26017e-99	5.70112e-99	FAP
ENSG00000105193	0.297477	1.33039e-99	6.01421e-99	RPS16
ENSG00000114391	0.297243	1.92722e-99	8.70563e-99	RPL24
ENSG00000171943	0.297242	1.93234e-99	8.72207e-99	SRGAP2C
ENSG00000092140	0.297162	2.19079e-99	9.88112e-99	G2E3
ENSG00000134376	-0.297151	2.22977e-99	1.00493e-98	CRB1
ENSG00000105792	0.297144	2.25394e-99	1.01504e-98	CFAP69
ENSG00000175928	0.296983	2.90759e-99	1.30841e-98	LRRN1
ENSG00000149806	0.296946	3.08207e-99	1.38588e-98	FAU
ENSG00000135972	0.296854	3.56957e-99	1.60387e-98	MRPS9
ENSG00000110429	0.296799	3.89225e-99	1.74752e-98	FBXO3
ENSG00000251141	0.296793	3.92552e-99	1.76112e-98	MRPS30-DT
ENSG00000255248	-0.296771	4.06376e-99	1.82176e-98	MIR100HG
ENSG00000122359	0.29673	4.3419e-99	1.94498e-98	ANXA11
ENSG00000167468	0.29665	4.92458e-99	2.20432e-98	GPX4
ENSG00000138769	0.296514	6.10653e-99	2.73131e-98	CDKL2
ENSG00000156958	0.296394	7.37711e-99	3.29711e-98	GALK2
ENSG00000154917	0.296067	1.23457e-98	5.5136e-98	RAB6B
ENSG00000163956	0.295766	1.9842e-98	8.85478e-98	LRPAP1
ENSG00000171533	0.295747	2.04257e-98	9.10837e-98	MAP6
ENSG00000186318	0.29569	2.23527e-98	9.96018e-98	BACE1
ENSG00000144649	-0.295469	3.16473e-98	1.40911e-97	GASK1A
ENSG00000113240	0.295388	3.59131e-98	1.59785e-97	CLK4
ENSG00000171385	0.295274	4.29453e-98	1.90929e-97	KCND3
ENSG00000107745	0.295187	4.92461e-98	2.18777e-97	MICU1
ENSG00000197713	0.295113	5.53491e-98	2.45705e-97	RPE
ENSG00000164619	0.294855	8.29957e-98	3.68157e-97	BMPER
ENSG00000053770	0.294841	8.47125e-98	3.75491e-97	AP5M1
ENSG00000138663	0.294756	9.68416e-98	4.28932e-97	COPS4
ENSG00000154723	0.294539	1.36014e-97	6.01983e-97	ATP5PF
ENSG00000089009	0.294531	1.37844e-97	6.09626e-97	RPL6
ENSG00000184304	-0.29438	1.7455e-97	7.71384e-97	PRKD1
ENSG00000172201	-0.294333	1.8776e-97	8.29143e-97	ID4
ENSG00000257727	0.29408	2.79124e-97	1.23169e-96	CNPY2
ENSG00000089022	0.293913	3.62367e-97	1.59782e-96	MAPKAPK5
ENSG00000132321	-0.293812	4.23869e-97	1.86762e-96	IQCA1
ENSG00000111790	0.293717	4.92072e-97	2.16651e-96	FGFR1OP2
ENSG00000127184	0.293716	4.92719e-97	2.16775e-96	COX7C
ENSG00000125462	-0.29361	5.80772e-97	2.55324e-96	C1orf61
ENSG00000072210	0.293394	8.14164e-97	3.57663e-96	ALDH3A2
ENSG00000165449	-0.293364	8.53135e-97	3.74505e-96	SLC16A9
ENSG00000120137	0.2932	1.10057e-96	4.82767e-96	PANK3
ENSG00000235450	0.293113	1.26142e-96	5.52913e-96	AC079760.1
ENSG00000178982	0.292969	1.57798e-96	6.91156e-96	EIF3K
ENSG00000086619	0.292865	1.85443e-96	8.11639e-96	ERO1B
ENSG00000066739	0.292821	1.9846e-96	8.67971e-96	ATG2B
ENSG00000196396	0.292684	2.45634e-96	1.07349e-95	PTPN1
ENSG00000237765	0.292668	2.51888e-96	1.10001e-95	FAM200B
ENSG00000168016	0.292556	2.99799e-96	1.30827e-95	TRANK1
ENSG00000168785	0.292535	3.0961e-96	1.35009e-95	TSPAN5
ENSG00000143933	0.292525	3.14558e-96	1.37065e-95	CALM2
ENSG00000152242	0.292512	3.20828e-96	1.39695e-95	C18orf25
ENSG00000176095	0.292487	3.33679e-96	1.45184e-95	IP6K1
ENSG00000108094	0.292339	4.19794e-96	1.82518e-95	CUL2
ENSG00000115268	0.292236	4.92196e-96	2.13839e-95	RPS15
ENSG00000100425	0.292227	4.99469e-96	2.1684e-95	BRD1
ENSG00000152332	0.292036	6.71527e-96	2.91324e-95	UHMK1
ENSG00000127511	0.291995	7.15468e-96	3.10158e-95	SIN3B
ENSG00000138670	-0.291903	8.2487e-96	3.57323e-95	RASGEF1B
ENSG00000141425	0.291773	1.00888e-95	4.36711e-95	RPRD1A
ENSG00000134899	0.291711	1.11027e-95	4.80251e-95	ERCC5
ENSG00000116120	0.291506	1.52559e-95	6.59417e-95	FARSB
ENSG00000163872	0.291451	1.66017e-95	7.17061e-95	YEATS2
ENSG00000149177	0.291316	2.04572e-95	8.82945e-95	PTPRJ
ENSG00000116095	0.29123	2.33828e-95	1.00848e-94	PLEKHA3
ENSG00000198162	0.291223	2.36162e-95	1.01781e-94	MAN1A2
ENSG00000170540	0.2912	2.44866e-95	1.05454e-94	ARL6IP1
ENSG00000075292	0.290927	3.7329e-95	1.60645e-94	ZNF638
ENSG00000197121	0.290775	4.71783e-95	2.02884e-94	PGAP1
ENSG00000152977	-0.290679	5.46653e-95	2.3491e-94	ZIC1
ENSG00000072958	0.290577	6.39736e-95	2.7471e-94	AP1M1
ENSG00000165966	0.290454	7.74234e-95	3.32224e-94	PDZRN4
ENSG00000075945	0.290451	7.77682e-95	3.33462e-94	KIFAP3
ENSG00000203791	0.290379	8.68864e-95	3.72289e-94	EEF1AKMT2
ENSG00000179915	0.290228	1.0954e-94	4.69016e-94	NRXN1
ENSG00000105738	0.29016	1.21697e-94	5.20691e-94	SIPA1L3
ENSG00000198648	0.290097	1.3401e-94	5.72958e-94	STK39
ENSG00000139083	-0.290087	1.36101e-94	5.81477e-94	ETV6
ENSG00000123091	0.290077	1.38236e-94	5.90172e-94	RNF11
ENSG00000241878	0.290053	1.43358e-94	6.11597e-94	PISD
ENSG00000172403	-0.289958	1.65957e-94	7.07499e-94	SYNPO2
ENSG00000196776	0.289924	1.74954e-94	7.4532e-94	CD47
ENSG00000102606	0.289814	2.07092e-94	8.81596e-94	ARHGEF7
ENSG00000099860	-0.289783	2.1713e-94	9.2366e-94	GADD45B
ENSG00000197969	0.28977	2.21407e-94	9.41177e-94	VPS13A
ENSG00000240038	0.289729	2.36009e-94	1.00253e-93	AMY2B
ENSG00000065665	0.289649	2.66805e-94	1.13253e-93	SEC61A2
ENSG00000112893	0.289588	2.92736e-94	1.24172e-93	MAN2A1
ENSG00000236051	0.289499	3.35558e-94	1.42233e-93	MYCBP2-AS1
ENSG00000182902	-0.289477	3.47182e-94	1.47055e-93	SLC25A18
ENSG00000150401	0.289447	3.63469e-94	1.53843e-93	DCUN1D2
ENSG00000003989	-0.289445	3.6452e-94	1.54178e-93	SLC7A2
ENSG00000087301	0.28942	3.79033e-94	1.60202e-93	TXNDC16
ENSG00000072401	0.289407	3.86707e-94	1.63329e-93	UBE2D1
ENSG00000087448	0.289152	5.71935e-94	2.41388e-93	KLHL42
ENSG00000113558	0.288884	8.61969e-94	3.63539e-93	SKP1
ENSG00000083067	-0.288822	9.46594e-94	3.98946e-93	TRPM3
ENSG00000274422	0.288762	1.03777e-93	4.37059e-93	AC245060.5
ENSG00000198795	-0.288735	1.08208e-93	4.55399e-93	ZNF521
ENSG00000205937	0.28866	1.21286e-93	5.10073e-93	RNPS1
ENSG00000237440	0.288657	1.21892e-93	5.1226e-93	ZNF737
ENSG00000254349	0.288592	1.34648e-93	5.65465e-93	MIR2052HG
ENSG00000153982	0.288502	1.54442e-93	6.48128e-93	GDPD1
ENSG00000154174	0.288455	1.66073e-93	6.96448e-93	TOMM70
ENSG00000139597	0.288425	1.73804e-93	7.2835e-93	N4BP2L1
ENSG00000230590	0.288251	2.26559e-93	9.48755e-93	FTX
ENSG00000122026	0.288088	2.90789e-93	1.21687e-92	RPL21
ENSG00000104164	0.288003	3.31164e-93	1.38485e-92	BLOC1S6
ENSG00000164048	0.28796	3.53231e-93	1.47608e-92	ZNF589
ENSG00000151332	0.287338	9.10532e-93	3.80224e-92	MBIP
ENSG00000285051	0.287316	9.4219e-93	3.93166e-92	SLC7A14-AS1
ENSG00000215114	0.287201	1.12162e-92	4.67712e-92	UBXN2B
ENSG00000162733	-0.287186	1.14812e-92	4.78423e-92	DDR2
ENSG00000113645	-0.287046	1.41906e-92	5.9091e-92	WWC1
ENSG00000179295	0.286889	1.80211e-92	7.49885e-92	PTPN11
ENSG00000108588	0.286542	3.05059e-92	1.2685e-91	CCDC47
ENSG00000198218	0.286527	3.12046e-92	1.29665e-91	QRICH1
ENSG00000178882	0.28643	3.61614e-92	1.50156e-91	RFLNA
ENSG00000140395	0.286364	3.99394e-92	1.65727e-91	WDR61
ENSG00000122591	0.286265	4.64109e-92	1.92446e-91	FAM126A
ENSG00000119801	0.286238	4.83369e-92	2.00292e-91	YPEL5
ENSG00000119285	0.286196	5.15053e-92	2.13271e-91	HEATR1
ENSG00000170445	0.286108	5.88668e-92	2.43583e-91	HARS
ENSG00000006451	0.285891	8.16748e-92	3.37722e-91	RALA
ENSG00000131711	0.285827	8.99508e-92	3.71684e-91	MAP1B
ENSG00000102053	0.285777	9.70782e-92	4.00854e-91	ZC3H12B
ENSG00000085433	0.28574	1.02717e-91	4.23841e-91	WDR47
ENSG00000250479	0.285617	1.23509e-91	5.09283e-91	CHCHD10
ENSG00000078668	0.285614	1.24192e-91	5.11742e-91	VDAC3
ENSG00000069431	-0.285587	1.29399e-91	5.32826e-91	ABCC9
ENSG00000119335	0.285492	1.49158e-91	6.13759e-91	SET
ENSG00000177189	0.285435	1.62608e-91	6.6864e-91	RPS6KA3
ENSG00000120686	0.285433	1.63065e-91	6.70049e-91	UFM1
ENSG00000173166	0.285354	1.83684e-91	7.54253e-91	RAPH1
ENSG00000196405	0.285095	2.71769e-91	1.11518e-90	EVL
ENSG00000136143	0.285046	2.92622e-91	1.19991e-90	SUCLA2
ENSG00000069329	0.285033	2.98276e-91	1.22225e-90	VPS35
ENSG00000130559	0.284987	3.19647e-91	1.30892e-90	CAMSAP1
ENSG00000172239	0.284714	4.81716e-91	1.9712e-90	PAIP1
ENSG00000227733	0.284674	5.11533e-91	2.09177e-90	AC239809.3
ENSG00000181751	0.284672	5.13156e-91	2.09695e-90	C5orf30
ENSG00000286288	-0.284672	5.13588e-91	2.09727e-90	AL109809.5
ENSG00000177889	0.28458	5.89176e-91	2.40428e-90	UBE2N
ENSG00000137815	0.284563	6.04854e-91	2.46655e-90	RTF1
ENSG00000164663	0.284504	6.6139e-91	2.69525e-90	USP49
ENSG00000134250	-0.28445	7.1712e-91	2.92034e-90	NOTCH2
ENSG00000132669	-0.284202	1.04075e-90	4.23535e-90	RIN2
ENSG00000163634	0.284196	1.04931e-90	4.26724e-90	THOC7
ENSG00000174842	0.284186	1.06517e-90	4.32877e-90	GLMN
ENSG00000111605	0.283889	1.66422e-90	6.75862e-90	CPSF6
ENSG00000091157	0.283879	1.68926e-90	6.8556e-90	WDR7
ENSG00000135976	0.283866	1.72131e-90	6.98085e-90	ANKRD36
ENSG00000143033	0.28384	1.78955e-90	7.25265e-90	MTF2
ENSG00000165675	0.283772	1.98336e-90	8.0326e-90	ENOX2
ENSG00000166479	0.283666	2.32489e-90	9.40934e-90	TMX3
ENSG00000104313	-0.28366	2.34501e-90	9.48428e-90	EYA1
ENSG00000170889	0.283653	2.37091e-90	9.58248e-90	RPS9
ENSG00000181449	-0.283637	2.42862e-90	9.80905e-90	SOX2
ENSG00000067248	0.283626	2.46699e-90	9.9572e-90	DHX29
ENSG00000241837	0.283529	2.85237e-90	1.15048e-89	ATP5PO
ENSG00000123607	0.283515	2.91347e-90	1.17432e-89	TTC21B
ENSG00000143493	0.283489	3.02786e-90	1.2196e-89	INTS7
ENSG00000231246	-0.283384	3.54247e-90	1.42591e-89	AL445426.1
ENSG00000111913	0.28336	3.6728e-90	1.47736e-89	RIPOR2
ENSG00000011523	0.283234	4.43401e-90	1.78235e-89	CEP68
ENSG00000178538	-0.283229	4.46853e-90	1.795e-89	CA8
ENSG00000180376	0.283154	4.99985e-90	2.00707e-89	CCDC66
ENSG00000137154	0.283076	5.61459e-90	2.25231e-89	RPS6
ENSG00000184203	0.283069	5.67502e-90	2.27501e-89	PPP1R2
ENSG00000198258	0.283035	5.97182e-90	2.39237e-89	UBL5
ENSG00000225914	0.282919	7.0982e-90	2.84168e-89	TSBP1-AS1
ENSG00000149273	0.282906	7.24625e-90	2.89899e-89	RPS3
ENSG00000077380	0.282876	7.57707e-90	3.02929e-89	DYNC1I2
ENSG00000003393	0.282628	1.09658e-89	4.38114e-89	ALS2
ENSG00000166411	0.282435	1.46186e-89	5.83658e-89	IDH3A
ENSG00000122643	0.282387	1.57016e-89	6.26475e-89	NT5C3A
ENSG00000129244	-0.282335	1.6964e-89	6.76388e-89	ATP1B2
ENSG00000197008	0.282258	1.90333e-89	7.58383e-89	ZNF138
ENSG00000153930	-0.282213	2.03428e-89	8.10013e-89	ANKFN1
ENSG00000185219	0.282179	2.14187e-89	8.52278e-89	ZNF445
ENSG00000092820	-0.282143	2.25832e-89	8.98014e-89	EZR
ENSG00000106105	0.282072	2.51016e-89	9.97485e-89	GARS
ENSG00000141298	0.282013	2.7387e-89	1.08757e-88	SSH2
ENSG00000163558	0.281964	2.94813e-89	1.16995e-88	PRKCI
ENSG00000171103	0.28182	3.64924e-89	1.44721e-88	TRMT61B
ENSG00000127540	0.281722	4.22167e-89	1.6731e-88	UQCR11
ENSG00000198034	0.281692	4.41974e-89	1.75043e-88	RPS4X
ENSG00000166260	0.281675	4.52694e-89	1.79169e-88	COX11
ENSG00000151718	0.281646	4.72612e-89	1.86927e-88	WWC2
ENSG00000175224	0.281593	5.11662e-89	2.02236e-88	ATG13
ENSG00000152102	0.281582	5.20409e-89	2.05556e-88	FAM168B
ENSG00000171863	0.281551	5.44923e-89	2.15095e-88	RPS7
ENSG00000166046	0.281482	6.03204e-89	2.37942e-88	TCP11L2
ENSG00000261609	-0.281432	6.49778e-89	2.56142e-88	GAN
ENSG00000242808	0.281375	7.07285e-89	2.78626e-88	SOX2-OT
ENSG00000165264	0.281278	8.16203e-89	3.21319e-88	NDUFB6
ENSG00000100554	0.281275	8.20702e-89	3.22875e-88	ATP6V1D
ENSG00000136810	0.281266	8.31086e-89	3.26743e-88	TXN
ENSG00000023734	0.281231	8.76119e-89	3.44219e-88	STRAP
ENSG00000005801	0.281036	1.16905e-88	4.59002e-88	ZNF195
ENSG00000148606	0.281007	1.22047e-88	4.78874e-88	POLR3A
ENSG00000239305	0.280942	1.34255e-88	5.26427e-88	RNF103
ENSG00000123240	0.280888	1.45437e-88	5.69893e-88	OPTN
ENSG00000125148	-0.28086	1.51784e-88	5.94371e-88	MT2A
ENSG00000100997	0.280858	1.52181e-88	5.95532e-88	ABHD12
ENSG00000156535	-0.28085	1.54053e-88	6.02458e-88	CD109
ENSG00000165566	0.280733	1.82971e-88	7.15073e-88	AMER2
ENSG00000149639	0.280571	2.32693e-88	9.08792e-88	SOGA1
ENSG00000079819	0.280566	2.34481e-88	9.15173e-88	EPB41L2
ENSG00000140943	0.280545	2.41673e-88	9.4262e-88	MBTPS1
ENSG00000163468	0.280482	2.65526e-88	1.03497e-87	CCT3
ENSG00000141446	0.280372	3.12106e-88	1.21573e-87	ESCO1
ENSG00000152409	0.280285	3.5486e-88	1.38136e-87	JMY
ENSG00000119772	0.280223	3.88944e-88	1.51304e-87	DNMT3A
ENSG00000130962	0.280139	4.40418e-88	1.71216e-87	PRRG1
ENSG00000196591	0.280114	4.57005e-88	1.77548e-87	HDAC2
ENSG00000164754	0.280016	5.2791e-88	2.04959e-87	RAD21
ENSG00000187210	0.279764	7.661e-88	2.97241e-87	GCNT1
ENSG00000176155	0.279756	7.74858e-88	3.00442e-87	CCDC57
ENSG00000108298	0.279653	9.01337e-88	3.49253e-87	RPL19
ENSG00000152661	-0.279587	9.94261e-88	3.85007e-87	GJA1
ENSG00000056998	-0.279412	1.28609e-87	4.97685e-87	GYG2
ENSG00000140988	0.279363	1.38189e-87	5.34408e-87	RPS2
ENSG00000230876	0.279295	1.52813e-87	5.90578e-87	LINC00486
ENSG00000100503	0.279231	1.67878e-87	6.48375e-87	NIN
ENSG00000163281	0.279226	1.69033e-87	6.5241e-87	GNPDA2
ENSG00000232112	0.279174	1.82394e-87	7.03519e-87	TMA7
ENSG00000076685	-0.27903	2.25626e-87	8.69703e-87	NT5C2
ENSG00000088986	0.278982	2.41867e-87	9.31699e-87	DYNLL1
ENSG00000180011	0.278874	2.83705e-87	1.09215e-86	ZADH2
ENSG00000004487	0.278765	3.32593e-87	1.27952e-86	KDM1A
ENSG00000032389	0.278736	3.47124e-87	1.33455e-86	EIPR1
ENSG00000133773	0.278681	3.76323e-87	1.44587e-86	CCDC59
ENSG00000124207	0.278668	3.83836e-87	1.47378e-86	CSE1L
ENSG00000188316	0.278585	4.33095e-87	1.66184e-86	ENO4
ENSG00000196268	0.278583	4.34775e-87	1.6672e-86	ZNF493
ENSG00000198954	0.278544	4.59939e-87	1.76255e-86	KIF1BP
ENSG00000128872	0.278498	4.92303e-87	1.88536e-86	TMOD2
ENSG00000100490	0.278478	5.06806e-87	1.93964e-86	CDKL1
ENSG00000164961	0.278463	5.17957e-87	1.98104e-86	WASHC5
ENSG00000125398	-0.278405	5.64136e-87	2.15626e-86	SOX9
ENSG00000117691	0.278393	5.74581e-87	2.19476e-86	NENF
ENSG00000031698	0.278283	6.74825e-87	2.57601e-86	SARS
ENSG00000047849	-0.278233	7.26194e-87	2.77031e-86	MAP4
ENSG00000152291	0.278145	8.25587e-87	3.14745e-86	TGOLN2
ENSG00000115053	0.278063	9.30678e-87	3.54581e-86	NCL
ENSG00000168952	0.278002	1.01748e-86	3.87403e-86	STXBP6
ENSG00000175866	0.27787	1.23559e-86	4.70145e-86	BAIAP2
ENSG00000129559	0.277859	1.25497e-86	4.77212e-86	NEDD8
ENSG00000228065	-0.277812	1.34373e-86	5.10635e-86	LINC01515
ENSG00000165630	0.277722	1.53411e-86	5.82607e-86	PRPF18
ENSG00000136238	0.277489	2.15442e-86	8.17655e-86	RAC1
ENSG00000146592	0.277456	2.25927e-86	8.569e-86	CREB5
ENSG00000082397	0.277417	2.39314e-86	9.07094e-86	EPB41L3
ENSG00000124783	0.277342	2.66857e-86	1.01084e-85	SSR1
ENSG00000105372	0.277307	2.80979e-86	1.06366e-85	RPS19
ENSG00000087502	0.277291	2.87483e-86	1.08758e-85	ERGIC2
ENSG00000140948	0.27712	3.69099e-86	1.39545e-85	ZCCHC14
ENSG00000172809	0.277015	4.30253e-86	1.62562e-85	RPL38
ENSG00000224848	0.276894	5.12857e-86	1.93648e-85	AL589843.1
ENSG00000258526	0.276859	5.3996e-86	2.03751e-85	AL049828.1
ENSG00000106460	0.276764	6.19625e-86	2.33664e-85	TMEM106B
ENSG00000197912	0.276725	6.56045e-86	2.4724e-85	SPG7
ENSG00000020426	0.276716	6.65155e-86	2.50513e-85	MNAT1
ENSG00000174780	0.276712	6.68816e-86	2.51732e-85	SRP72
ENSG00000182093	0.276699	6.81117e-86	2.56199e-85	GET1
ENSG00000168214	0.276553	8.42019e-86	3.1652e-85	RBPJ
ENSG00000088970	0.276518	8.86526e-86	3.33039e-85	KIZ
ENSG00000115368	0.276502	9.0777e-86	3.40803e-85	WDR75
ENSG00000145414	0.276492	9.20181e-86	3.45243e-85	NAF1
ENSG00000174606	0.276368	1.10288e-85	4.13527e-85	ANGEL2
ENSG00000109133	0.276335	1.15618e-85	4.33239e-85	TMEM33
ENSG00000163659	-0.276311	1.19729e-85	4.48357e-85	TIPARP
ENSG00000119900	-0.2763	1.21671e-85	4.55341e-85	OGFRL1
ENSG00000159176	-0.276108	1.6083e-85	6.01509e-85	CSRP1
ENSG00000152936	-0.276063	1.71634e-85	6.41511e-85	LMNTD1
ENSG00000159388	-0.275897	2.18393e-85	8.15766e-85	BTG2
ENSG00000114902	0.275879	2.24235e-85	8.37061e-85	SPCS1
ENSG00000083642	0.275638	3.17752e-85	1.1854e-84	PDS5B
ENSG00000108055	0.275455	4.14653e-85	1.54593e-84	SMC3
ENSG00000163029	0.275353	4.80019e-85	1.7885e-84	SMC6
ENSG00000115840	0.275271	5.40699e-85	2.01332e-84	SLC25A12
ENSG00000133612	0.275143	6.50722e-85	2.42147e-84	AGAP3
ENSG00000109180	0.275105	6.8732e-85	2.55605e-84	OCIAD1
ENSG00000127328	0.275048	7.47e-85	2.77625e-84	RAB3IP
ENSG00000167113	0.275035	7.60582e-85	2.82495e-84	COQ4
ENSG00000250159	0.274903	9.2066e-85	3.41736e-84	AC106791.1
ENSG00000133872	0.274879	9.52428e-85	3.53307e-84	SARAF
ENSG00000123352	0.274865	9.72623e-85	3.60572e-84	SPATS2
ENSG00000241973	0.274823	1.03372e-84	3.82983e-84	PI4KA
ENSG00000241685	0.274621	1.38319e-84	5.12135e-84	ARPC1A
ENSG00000152484	0.274537	1.56119e-84	5.77681e-84	USP12
ENSG00000214517	0.274526	1.58686e-84	5.86812e-84	PPME1
ENSG00000103723	0.274495	1.65797e-84	6.12722e-84	AP3B2
ENSG00000099250	0.274424	1.83776e-84	6.78743e-84	NRP1
ENSG00000149256	-0.274418	1.85402e-84	6.8432e-84	TENM4
ENSG00000186184	0.274402	1.89781e-84	7.00048e-84	POLR1D
ENSG00000176124	0.274288	2.23379e-84	8.23468e-84	DLEU1
ENSG00000170606	0.274148	2.73542e-84	1.00776e-83	HSPA4
ENSG00000170946	0.274102	2.91949e-84	1.0749e-83	DNAJC24
ENSG00000170160	0.274085	2.99485e-84	1.10196e-83	CCDC144A
ENSG00000163257	0.273764	4.75115e-84	1.74711e-83	DCAF16
ENSG00000092978	0.27366	5.51574e-84	2.02701e-83	GPATCH2
ENSG00000106415	0.273543	6.52831e-84	2.39763e-83	GLCCI1
ENSG00000118939	0.273448	7.48044e-84	2.74561e-83	UCHL3
ENSG00000116288	0.273446	7.4985e-84	2.75054e-83	PARK7
ENSG00000109790	0.273201	1.06614e-83	3.90831e-83	KLHL5
ENSG00000136942	0.273184	1.09144e-83	3.99855e-83	RPL35
ENSG00000139324	0.273153	1.14203e-83	4.18132e-83	TMTC3
ENSG00000090470	0.27309	1.2492e-83	4.57088e-83	PDCD7
ENSG00000115685	0.273053	1.31679e-83	4.81519e-83	PPP1R7
ENSG00000164975	0.273021	1.38046e-83	5.04492e-83	SNAPC3
ENSG00000147854	0.272983	1.45757e-83	5.32343e-83	UHRF2
ENSG00000172164	-0.272774	1.96532e-83	7.17342e-83	SNTB1
ENSG00000091164	0.272741	2.06029e-83	7.51544e-83	TXNL1
ENSG00000243069	-0.272672	2.27482e-83	8.29285e-83	ARHGEF26-AS1
ENSG00000142937	0.272655	2.32936e-83	8.48646e-83	RPS8
ENSG00000171867	0.272514	2.85176e-83	1.03833e-82	PRNP
ENSG00000162368	0.272489	2.95238e-83	1.0743e-82	CMPK1
ENSG00000101439	-0.272389	3.40786e-83	1.23928e-82	CST3
ENSG00000215252	0.272126	4.96298e-83	1.80369e-82	GOLGA8B
ENSG00000178425	0.272124	4.97777e-83	1.80796e-82	NT5DC1
ENSG00000140992	0.272087	5.24483e-83	1.90379e-82	PDPK1
ENSG00000092969	-0.272051	5.5203e-83	2.00255e-82	TGFB2
ENSG00000117620	0.272046	5.56059e-83	2.01593e-82	SLC35A3
ENSG00000170088	0.271981	6.09981e-83	2.21006e-82	TMEM192
ENSG00000138735	0.271611	1.03394e-82	3.74384e-82	PDE5A
ENSG00000151923	0.271508	1.19618e-82	4.32864e-82	TIAL1
ENSG00000143469	0.271396	1.40444e-82	5.07917e-82	SYT14
ENSG00000138834	0.271384	1.42844e-82	5.16281e-82	MAPK8IP3
ENSG00000101849	-0.271374	1.44752e-82	5.2286e-82	TBL1X
ENSG00000284977	-0.271274	1.67011e-82	6.02891e-82	AL160272.1
ENSG00000164941	0.271229	1.77936e-82	6.41938e-82	INTS8
ENSG00000198380	0.27103	2.36365e-82	8.52211e-82	GFPT1
ENSG00000129317	0.270888	2.88925e-82	1.04108e-81	PUS7L
ENSG00000119042	0.270854	3.03291e-82	1.09218e-81	SATB2
ENSG00000182400	0.270565	4.56868e-82	1.64423e-81	TRAPPC6B
ENSG00000186187	0.270486	5.11482e-82	1.83965e-81	ZNRF1
ENSG00000086061	0.270415	5.65112e-82	2.03131e-81	DNAJA1
ENSG00000286533	-0.270291	6.73469e-82	2.41933e-81	AL078604.4
ENSG00000157500	0.270231	7.33501e-82	2.63339e-81	APPL1
ENSG00000104763	0.270126	8.51597e-82	3.05552e-81	ASAH1
ENSG00000127989	0.270087	8.98999e-82	3.22364e-81	MTERF1
ENSG00000130402	0.270027	9.79477e-82	3.51009e-81	ACTN4
ENSG00000111674	0.269859	1.24083e-81	4.44399e-81	ENO2
ENSG00000009307	0.269786	1.37585e-81	4.92456e-81	CSDE1
ENSG00000084234	0.269685	1.58871e-81	5.68303e-81	APLP2
ENSG00000119402	0.26956	1.8945e-81	6.77278e-81	FBXW2
ENSG00000101182	0.269507	2.04056e-81	7.29054e-81	PSMA7
ENSG00000102804	0.269243	2.96186e-81	1.05758e-80	TSC22D1
ENSG00000134759	0.269205	3.12744e-81	1.11603e-80	ELP2
ENSG00000170485	-0.269161	3.32584e-81	1.18611e-80	NPAS2
ENSG00000134717	0.269145	3.40204e-81	1.21255e-80	BTF3L4
ENSG00000139180	0.268986	4.25589e-81	1.51597e-80	NDUFA9
ENSG00000100941	0.268818	5.39282e-81	1.91979e-80	PNN
ENSG00000125868	0.268683	6.51588e-81	2.3182e-80	DSTN
ENSG00000116731	0.268615	7.17218e-81	2.55016e-80	PRDM2
ENSG00000135951	0.268499	8.4461e-81	3.00131e-80	TSGA10
ENSG00000196428	-0.268479	8.68391e-81	3.08396e-80	TSC22D2
ENSG00000203965	0.268413	9.53159e-81	3.38297e-80	EFCAB7
ENSG00000241472	0.26841	9.56069e-81	3.39126e-80	PTPRG-AS1
ENSG00000110172	0.268326	1.07596e-80	3.81423e-80	CHORDC1
ENSG00000008018	0.268313	1.09674e-80	3.88556e-80	PSMB1
ENSG00000134243	0.268242	1.21152e-80	4.28965e-80	SORT1
ENSG00000134987	0.268214	1.25912e-80	4.45553e-80	WDR36
ENSG00000197226	0.2681	1.47909e-80	5.23078e-80	TBC1D9B
ENSG00000165417	0.267937	1.85852e-80	6.56868e-80	GTF2A1
ENSG00000111727	0.267889	1.98609e-80	7.01539e-80	HCFC2
ENSG00000164118	0.267827	2.16891e-80	7.65658e-80	CEP44
ENSG00000121274	0.267794	2.2691e-80	8.00549e-80	TENT4B
ENSG00000150712	0.267768	2.35357e-80	8.29853e-80	MTMR12
ENSG00000154529	-0.267759	2.38576e-80	8.40705e-80	CNTNAP3B
ENSG00000119899	0.267729	2.48828e-80	8.76308e-80	SLC17A5
ENSG00000137033	-0.267651	2.77207e-80	9.7567e-80	IL33
ENSG00000179981	0.267556	3.16718e-80	1.11407e-79	TSHZ1
ENSG00000151502	0.267495	3.45311e-80	1.21392e-79	VPS26B
ENSG00000169499	0.267482	3.51601e-80	1.2353e-79	PLEKHA2
ENSG00000168827	0.267467	3.58871e-80	1.2601e-79	GFM1
ENSG00000169905	0.267311	4.46565e-80	1.56709e-79	TOR1AIP2
ENSG00000119280	-0.267167	5.45985e-80	1.91483e-79	C1orf198
ENSG00000112033	0.267085	6.11793e-80	2.14436e-79	PPARD
ENSG00000119541	0.267018	6.72008e-80	2.35402e-79	VPS4B
ENSG00000025156	0.266772	9.47239e-80	3.31618e-79	HSF2
ENSG00000184752	0.266694	1.05698e-79	3.69818e-79	NDUFA12
ENSG00000076555	-0.266609	1.18977e-79	4.16033e-79	ACACB
ENSG00000116918	0.266409	1.57181e-79	5.49299e-79	TSNAX
ENSG00000164164	0.26635	1.70551e-79	5.95668e-79	OTUD4
ENSG00000139117	-0.266276	1.89093e-79	6.6004e-79	CPNE8
ENSG00000119396	0.266203	2.09386e-79	7.30442e-79	RAB14
ENSG00000164933	0.266087	2.46159e-79	8.5822e-79	SLC25A32
ENSG00000147679	0.266071	2.51636e-79	8.76798e-79	UTP23
ENSG00000185129	0.266063	2.54514e-79	8.86304e-79	PURA
ENSG00000104419	0.266026	2.67825e-79	9.32106e-79	NDRG1
ENSG00000116209	0.26597	2.89425e-79	1.00669e-78	TMEM59
ENSG00000169570	0.265875	3.30518e-79	1.14894e-78	DTWD2
ENSG00000069248	0.265602	4.82395e-79	1.67591e-78	NUP133
ENSG00000248429	-0.265527	5.35457e-79	1.85917e-78	FAM198B-AS1
ENSG00000160299	0.265335	6.99277e-79	2.42654e-78	PCNT
ENSG00000161016	0.265318	7.15319e-79	2.48075e-78	RPL8
ENSG00000154803	0.265262	7.7299e-79	2.67919e-78	FLCN
ENSG00000164182	0.265196	8.47151e-79	2.93451e-78	NDUFAF2
ENSG00000127838	0.265072	1.00629e-78	3.48371e-78	PNKD
ENSG00000165637	0.265066	1.01521e-78	3.51255e-78	VDAC2
ENSG00000133103	0.264982	1.13941e-78	3.93994e-78	COG6
ENSG00000126351	0.264928	1.22873e-78	4.24632e-78	THRA
ENSG00000071073	0.264851	1.36731e-78	4.72249e-78	MGAT4A
ENSG00000127980	0.264849	1.37092e-78	4.7322e-78	PEX1
ENSG00000104442	0.264841	1.38624e-78	4.78227e-78	ARMC1
ENSG00000196510	0.264804	1.45879e-78	5.02963e-78	ANAPC7
ENSG00000257093	0.264761	1.5473e-78	5.33168e-78	DENND11
ENSG00000071794	0.264722	1.63396e-78	5.62702e-78	HLTF
ENSG00000090273	0.264716	1.6481e-78	5.6724e-78	NUDC
ENSG00000087460	0.264537	2.11018e-78	7.25859e-78	GNAS
ENSG00000106686	0.264517	2.16748e-78	7.45133e-78	SPATA6L
ENSG00000074266	0.264458	2.35212e-78	8.08141e-78	EED
ENSG00000151917	0.264457	2.35521e-78	8.0873e-78	BEND6
ENSG00000183726	0.264428	2.45201e-78	8.41482e-78	TMEM50A
ENSG00000271533	0.264389	2.58714e-78	8.87342e-78	Z83843.1
ENSG00000198301	0.264375	2.63911e-78	9.0464e-78	SDAD1
ENSG00000187109	0.264089	3.91538e-78	1.34135e-77	NAP1L1
ENSG00000179454	0.263953	4.72267e-78	1.61697e-77	KLHL28
ENSG00000229847	-0.26386	5.36758e-78	1.83672e-77	EMX2OS
ENSG00000164924	0.263683	6.84493e-78	2.34089e-77	YWHAZ
ENSG00000088179	0.263657	7.09895e-78	2.42636e-77	PTPN4
ENSG00000196199	0.263564	8.06375e-78	2.75453e-77	MPHOSPH8
ENSG00000005379	0.263447	9.47031e-78	3.23314e-77	TSPOAP1
ENSG00000124164	0.263396	1.01583e-77	3.46601e-77	VAPB
ENSG00000136104	0.263315	1.13696e-77	3.87706e-77	RNASEH2B
ENSG00000020922	0.263269	1.21092e-77	4.1269e-77	MRE11
ENSG00000169504	-0.263233	1.27133e-77	4.33029e-77	CLIC4
ENSG00000142089	-0.263225	1.28571e-77	4.37674e-77	IFITM3
ENSG00000250602	-0.262991	1.77281e-77	6.03141e-77	AC093535.1
ENSG00000233237	-0.262972	1.82025e-77	6.18927e-77	LINC00472
ENSG00000040731	0.262931	1.92447e-77	6.53989e-77	CDH10
ENSG00000119698	0.26293	1.92672e-77	6.54376e-77	PPP4R4
ENSG00000143756	0.262866	2.10596e-77	7.14843e-77	FBXO28
ENSG00000205269	0.262833	2.20103e-77	7.46682e-77	TMEM170B
ENSG00000147996	0.26281	2.27165e-77	7.70199e-77	CBWD5
ENSG00000137266	0.262727	2.54819e-77	8.63464e-77	SLC22A23
ENSG00000079332	0.262563	3.18768e-77	1.07954e-76	SAR1A
ENSG00000130255	0.262483	3.55678e-77	1.20385e-76	RPL36
ENSG00000106571	-0.262391	4.03721e-77	1.36568e-76	GLI3
ENSG00000112941	0.262339	4.33209e-77	1.46459e-76	TENT4A
ENSG00000086289	0.262321	4.44187e-77	1.50084e-76	EPDR1
ENSG00000106299	0.262314	4.48252e-77	1.51371e-76	WASL
ENSG00000196531	0.262229	5.03623e-77	1.69973e-76	NACA
ENSG00000153107	0.262194	5.28321e-77	1.78207e-76	ANAPC1
ENSG00000051825	0.262187	5.33512e-77	1.79855e-76	MPHOSPH9
ENSG00000153317	-0.262181	5.37975e-77	1.81256e-76	ASAP1
ENSG00000155636	0.262093	6.0619e-77	2.04123e-76	RBM45
ENSG00000065150	0.261998	6.90752e-77	2.32465e-76	IPO5
ENSG00000134533	0.261838	8.59434e-77	2.89069e-76	RERG
ENSG00000125814	0.261794	9.12063e-77	3.06596e-76	NAPB
ENSG00000101152	0.261783	9.25888e-77	3.11067e-76	DNAJC5
ENSG00000177058	0.261587	1.21002e-76	4.06295e-76	SLC38A9
ENSG00000181982	0.261483	1.39523e-76	4.68218e-76	CCDC149
ENSG00000101680	-0.26147	1.41928e-76	4.76019e-76	LAMA1
ENSG00000196912	0.261336	1.70372e-76	5.71092e-76	ANKRD36B
ENSG00000203880	0.26132	1.74146e-76	5.83412e-76	PCMTD2
ENSG00000170632	0.261246	1.92649e-76	6.45036e-76	ARMC10
ENSG00000105866	0.261196	2.0617e-76	6.89918e-76	SP4
ENSG00000152749	0.261099	2.3533e-76	7.87049e-76	GPR180
ENSG00000134186	0.261007	2.66686e-76	8.91415e-76	PRPF38B
ENSG00000129292	0.260926	2.97899e-76	9.95184e-76	PHF20L1
ENSG00000134775	0.260905	3.06365e-76	1.02289e-75	FHOD3
ENSG00000132561	-0.260743	3.82059e-76	1.2749e-75	MATN2
ENSG00000100387	0.260705	4.02266e-76	1.34157e-75	RBX1
ENSG00000127995	0.260655	4.30663e-76	1.43546e-75	CASD1
ENSG00000116198	0.260597	4.65894e-76	1.55202e-75	CEP104
ENSG00000196663	0.260572	4.81744e-76	1.60391e-75	TECPR2
ENSG00000134138	-0.260522	5.15461e-76	1.7152e-75	MEIS2
ENSG00000204628	0.260495	5.35152e-76	1.77973e-75	RACK1
ENSG00000163510	0.260448	5.70341e-76	1.89569e-75	CWC22
ENSG00000048740	0.26043	5.84539e-76	1.94179e-75	CELF2
ENSG00000111530	0.260383	6.22522e-76	2.0668e-75	CAND1
ENSG00000137936	-0.260381	6.23999e-76	2.07054e-75	BCAR3
ENSG00000102760	0.260315	6.83274e-76	2.26596e-75	RGCC
ENSG00000151247	0.260294	7.0235e-76	2.32791e-75	EIF4E
ENSG00000287683	0.260213	7.83825e-76	2.5965e-75	AL591519.1
ENSG00000007372	-0.26017	8.31223e-76	2.75197e-75	PAX6
ENSG00000124942	-0.260093	9.22264e-76	3.05168e-75	AHNAK
ENSG00000028528	0.26008	9.39642e-76	3.10744e-75	SNX1
ENSG00000133835	0.260004	1.04122e-75	3.44144e-75	HSD17B4
ENSG00000115484	0.259991	1.05993e-75	3.50132e-75	CCT4
ENSG00000005020	0.259746	1.47572e-75	4.87209e-75	SKAP2
ENSG00000112320	0.259742	1.48429e-75	4.89764e-75	SOBP
ENSG00000153147	0.259709	1.55104e-75	5.11507e-75	SMARCA5
ENSG00000137055	0.259585	1.83617e-75	6.052e-75	PLAA
ENSG00000148655	-0.25954	1.95045e-75	6.42507e-75	LRMDA
ENSG00000004766	0.25938	2.42048e-75	7.969e-75	VPS50
ENSG00000184076	0.25935	2.5197e-75	8.29104e-75	UQCR10
ENSG00000047315	0.259285	2.75236e-75	9.05155e-75	POLR2B
ENSG00000100596	0.259194	3.11103e-75	1.02254e-74	SPTLC2
ENSG00000091140	0.259142	3.33949e-75	1.09702e-74	DLD
ENSG00000091039	0.259084	3.60969e-75	1.18513e-74	OSBPL8
ENSG00000118420	0.259071	3.67616e-75	1.20628e-74	UBE3D
ENSG00000113580	0.259002	4.03048e-75	1.32181e-74	NR3C1
ENSG00000108557	0.258981	4.1466e-75	1.35914e-74	RAI1
ENSG00000125821	0.258938	4.39866e-75	1.44096e-74	DTD1
ENSG00000206418	0.258928	4.45621e-75	1.459e-74	RAB12
ENSG00000022267	0.258844	4.98737e-75	1.63201e-74	FHL1
ENSG00000183648	0.258829	5.09484e-75	1.66625e-74	NDUFB1
ENSG00000036054	0.258781	5.43282e-75	1.7758e-74	TBC1D23
ENSG00000144136	0.25874	5.74277e-75	1.87608e-74	SLC20A1
ENSG00000188177	0.258707	6.00369e-75	1.96023e-74	ZC3H6
ENSG00000133703	0.258678	6.24086e-75	2.03654e-74	KRAS
ENSG00000176390	0.258647	6.50967e-75	2.12309e-74	CRLF3
ENSG00000198888	0.258612	6.82187e-75	2.22369e-74	MT-ND1
ENSG00000181163	0.258545	7.46053e-75	2.43053e-74	NPM1
ENSG00000205629	0.258494	7.99439e-75	2.60302e-74	LCMT1
ENSG00000168702	-0.258476	8.19269e-75	2.66612e-74	LRP1B
ENSG00000150347	0.258445	8.53781e-75	2.7769e-74	ARID5B
ENSG00000126067	0.25843	8.71132e-75	2.83178e-74	PSMB2
ENSG00000123094	-0.258253	1.10529e-74	3.59098e-74	RASSF8
ENSG00000093144	0.25825	1.11014e-74	3.60475e-74	ECHDC1
ENSG00000034693	0.258182	1.21672e-74	3.94868e-74	PEX3
ENSG00000068885	0.258125	1.31315e-74	4.25929e-74	IFT80
ENSG00000102531	0.258083	1.38964e-74	4.50489e-74	FNDC3A
ENSG00000168386	0.258057	1.43945e-74	4.66383e-74	FILIP1L
ENSG00000171044	0.258055	1.44165e-74	4.6684e-74	XKR6
ENSG00000144021	0.258046	1.45999e-74	4.7252e-74	CIAO1
ENSG00000214595	0.257883	1.8166e-74	5.87611e-74	EML6
ENSG00000075790	0.257573	2.75535e-74	8.90779e-74	BCAP29
ENSG00000061938	0.257552	2.83397e-74	9.15698e-74	TNK2
ENSG00000152700	0.257468	3.16825e-74	1.02315e-73	SAR1B
ENSG00000109787	0.257399	3.47774e-74	1.12248e-73	KLF3
ENSG00000225830	0.257389	3.52427e-74	1.13688e-73	ERCC6
ENSG00000088833	0.25737	3.61386e-74	1.16515e-73	NSFL1C
ENSG00000172795	0.257347	3.72987e-74	1.20189e-73	DCP2
ENSG00000188690	0.257309	3.92142e-74	1.26293e-73	UROS
ENSG00000138386	0.257301	3.96214e-74	1.27535e-73	NAB1
ENSG00000017797	0.257174	4.69711e-74	1.5111e-73	RALBP1
ENSG00000066422	0.257105	5.15166e-74	1.65643e-73	ZBTB11
ENSG00000144320	0.257098	5.20171e-74	1.67161e-73	LNPK
ENSG00000008256	0.256989	6.01607e-74	1.93227e-73	CYTH3
ENSG00000196177	0.256963	6.23394e-74	2.00116e-73	ACADSB
ENSG00000196683	0.256952	6.3206e-74	2.02787e-73	TOMM7
ENSG00000116199	0.256907	6.71864e-74	2.15441e-73	FAM20B
ENSG00000145860	0.256763	8.14084e-74	2.60904e-73	RNF145
ENSG00000134419	0.256762	8.15562e-74	2.61236e-73	RPS15A
ENSG00000184903	-0.256707	8.76984e-74	2.80758e-73	IMMP2L
ENSG00000135390	0.256602	1.00866e-73	3.22738e-73	ATP5MC2
ENSG00000131697	0.256461	1.21781e-73	3.8945e-73	NPHP4
ENSG00000126698	0.256363	1.38813e-73	4.43678e-73	DNAJC8
ENSG00000143376	0.256361	1.39176e-73	4.44597e-73	SNX27
ENSG00000229321	0.256334	1.44206e-73	4.60417e-73	AC008269.1
ENSG00000113638	0.256304	1.50076e-73	4.78899e-73	TTC33
ENSG00000168092	0.256302	1.50578e-73	4.8024e-73	PAFAH1B2
ENSG00000249915	0.256193	1.74023e-73	5.54715e-73	PDCD6
ENSG00000205726	-0.256175	1.78383e-73	5.68308e-73	ITSN1
ENSG00000150627	0.256132	1.88893e-73	6.01469e-73	WDR17
ENSG00000244687	0.255711	3.30808e-73	1.05278e-72	UBE2V1
ENSG00000197013	0.255485	4.46412e-73	1.41992e-72	ZNF429
ENSG00000198382	0.255458	4.62729e-73	1.47103e-72	UVRAG
ENSG00000171858	0.255427	4.82038e-73	1.53159e-72	RPS21
ENSG00000144747	0.255109	7.35557e-73	2.33585e-72	TMF1
ENSG00000155313	0.255053	7.92153e-73	2.51423e-72	USP25
ENSG00000139155	-0.254933	9.28333e-73	2.94487e-72	SLCO1C1
ENSG00000106546	0.254783	1.13273e-72	3.59132e-72	AHR
ENSG00000141084	0.254755	1.17487e-72	3.72292e-72	RANBP10
ENSG00000115364	0.254679	1.29998e-72	4.1172e-72	MRPL19
ENSG00000198909	0.254563	1.5146e-72	4.79434e-72	MAP3K3
ENSG00000115993	0.254536	1.56993e-72	4.96682e-72	TRAK2
ENSG00000137267	0.254505	1.63536e-72	5.17106e-72	TUBB2A
ENSG00000015479	0.254503	1.63945e-72	5.18123e-72	MATR3
ENSG00000068383	0.254436	1.79098e-72	5.6571e-72	INPP5A
ENSG00000172175	0.254393	1.89557e-72	5.98425e-72	MALT1
ENSG00000154553	-0.254367	1.96187e-72	6.19026e-72	PDLIM3
ENSG00000105662	0.254363	1.97289e-72	6.22171e-72	CRTC1
ENSG00000144635	0.254268	2.23757e-72	7.05265e-72	DYNC1LI1
ENSG00000100767	-0.254266	2.24267e-72	7.06495e-72	PAPLN
ENSG00000099331	0.254216	2.39536e-72	7.54195e-72	MYO9B
ENSG00000164209	0.254214	2.40269e-72	7.561e-72	SLC25A46
ENSG00000113643	0.254152	2.6054e-72	8.19455e-72	RARS
ENSG00000152952	-0.254046	2.99742e-72	9.4225e-72	PLOD2
ENSG00000117569	0.253996	3.20454e-72	1.00682e-71	PTBP2
ENSG00000103264	0.253895	3.65722e-72	1.14844e-71	FBXO31
ENSG00000175470	0.253876	3.74982e-72	1.1769e-71	PPP2R2D
ENSG00000001461	0.253865	3.80922e-72	1.1949e-71	NIPAL3
ENSG00000161551	0.253812	4.08488e-72	1.28069e-71	ZNF577
ENSG00000169604	-0.253792	4.19047e-72	1.3131e-71	ANTXR1
ENSG00000163743	0.253777	4.27749e-72	1.33966e-71	RCHY1
ENSG00000131725	0.253618	5.26869e-72	1.64922e-71	WDR44
ENSG00000088280	-0.253615	5.28978e-72	1.65494e-71	ASAP3
ENSG00000254772	0.253587	5.48796e-72	1.71604e-71	EEF1G
ENSG00000107295	0.253565	5.65558e-72	1.76752e-71	SH3GL2
ENSG00000204389	-0.25348	6.31939e-72	1.97393e-71	HSPA1A
ENSG00000198786	0.253475	6.3633e-72	1.9866e-71	MT-ND5
ENSG00000206199	0.25338	7.2083e-72	2.24922e-71	ANKUB1
ENSG00000196305	0.253227	8.8166e-72	2.74961e-71	IARS
ENSG00000130779	-0.253089	1.057e-71	3.29468e-71	CLIP1
ENSG00000068903	0.253083	1.06531e-71	3.3177e-71	SIRT2
ENSG00000162378	0.253083	1.0655e-71	3.3177e-71	ZYG11B
ENSG00000070081	0.253017	1.16169e-71	3.61529e-71	NUCB2
ENSG00000170836	0.253012	1.16948e-71	3.63763e-71	PPM1D
ENSG00000171055	0.252888	1.37588e-71	4.27737e-71	FEZ2
ENSG00000133114	0.252888	1.37723e-71	4.27933e-71	GPALPP1
ENSG00000163093	0.25285	1.44685e-71	4.49328e-71	BBS5
ENSG00000243701	0.252771	1.6052e-71	4.98244e-71	DUBR
ENSG00000159593	0.252651	1.87917e-71	5.82976e-71	NAE1
ENSG00000164684	0.252597	2.01737e-71	6.25523e-71	ZNF704
ENSG00000185716	0.252591	2.0334e-71	6.30162e-71	MOSMO
ENSG00000145740	0.252038	4.19358e-71	1.29893e-70	SLC30A5
ENSG00000113615	0.2519	5.02178e-71	1.55465e-70	SEC24A
ENSG00000134107	-0.251769	5.95594e-71	1.84288e-70	BHLHE40
ENSG00000070269	0.251687	6.62873e-71	2.04998e-70	TMEM260
ENSG00000084764	0.251633	7.11084e-71	2.19793e-70	MAPRE3
ENSG00000132463	0.25162	7.24137e-71	2.23711e-70	GRSF1
ENSG00000178234	0.251584	7.58525e-71	2.34212e-70	GALNT11
ENSG00000274211	0.251494	8.52688e-71	2.6315e-70	SOCS7
ENSG00000116754	0.251482	8.6662e-71	2.6731e-70	SRSF11
ENSG00000151151	0.251433	9.23026e-71	2.8456e-70	IPMK
ENSG00000171444	-0.25131	1.08357e-70	3.33881e-70	MCC
ENSG00000150787	0.251064	1.49314e-70	4.5984e-70	PTS
ENSG00000171223	-0.251031	1.55918e-70	4.79927e-70	JUNB
ENSG00000083844	0.251004	1.615e-70	4.96851e-70	ZNF264
ENSG00000189283	-0.250967	1.69533e-70	5.21293e-70	FHIT
ENSG00000188529	0.250948	1.7374e-70	5.33953e-70	SRSF10
ENSG00000135018	0.250682	2.45604e-70	7.54419e-70	UBQLN1
ENSG00000197930	0.250617	2.67239e-70	8.20449e-70	ERO1A
ENSG00000083097	0.250572	2.83406e-70	8.69632e-70	DOP1A
ENSG00000138771	-0.250529	2.99665e-70	9.19044e-70	SHROOM3
ENSG00000171291	0.250488	3.1576e-70	9.67906e-70	ZNF439
ENSG00000090661	0.250434	3.38848e-70	1.03814e-69	CERS4
ENSG00000163904	0.250406	3.51379e-70	1.07597e-69	SENP2
ENSG00000198121	0.250359	3.73544e-70	1.14325e-69	LPAR1
ENSG00000099624	0.250293	4.07064e-70	1.2452e-69	ATP5F1D
ENSG00000071082	0.250237	4.37614e-70	1.33796e-69	RPL31
ENSG00000101557	0.250166	4.79611e-70	1.4656e-69	USP14
ENSG00000102081	0.249847	7.25533e-70	2.21595e-69	FMR1
ENSG00000156804	0.249762	8.0955e-70	2.47128e-69	FBXO32
ENSG00000085511	0.249722	8.5305e-70	2.60273e-69	MAP3K4
ENSG00000114209	0.249695	8.82943e-70	2.69254e-69	PDCD10
ENSG00000022840	0.24967	9.11553e-70	2.77836e-69	RNF10
ENSG00000187257	0.249632	9.57502e-70	2.9169e-69	RSBN1L
ENSG00000042317	0.249561	1.04953e-69	3.1956e-69	SPATA7
ENSG00000155097	0.249519	1.10862e-69	3.37378e-69	ATP6V1C1
ENSG00000286125	0.249502	1.13289e-69	3.44589e-69	AC006115.2
ENSG00000164124	0.249482	1.16253e-69	3.53422e-69	TMEM144
ENSG00000166441	0.24944	1.22766e-69	3.73028e-69	RPL27A
ENSG00000181322	0.249396	1.30057e-69	3.9498e-69	NME9
ENSG00000164151	0.249374	1.33698e-69	4.05829e-69	ICE1
ENSG00000166503	0.24933	1.41549e-69	4.29439e-69	HDGFL3
ENSG00000146540	0.249287	1.49592e-69	4.53609e-69	C7orf50
ENSG00000125703	0.249277	1.51644e-69	4.59595e-69	ATG4C
ENSG00000232119	0.249215	1.64163e-69	4.97284e-69	MCTS1
ENSG00000178075	-0.249178	1.72313e-69	5.21703e-69	GRAMD1C
ENSG00000198920	0.249163	1.75553e-69	5.31242e-69	KIAA0753
ENSG00000036530	0.249155	1.77425e-69	5.36632e-69	CYP46A1
ENSG00000171988	0.249095	1.91772e-69	5.79728e-69	JMJD1C
ENSG00000221914	0.249057	2.01377e-69	6.08454e-69	PPP2R2A
ENSG00000131174	0.249036	2.06972e-69	6.25037e-69	COX7B
ENSG00000156395	0.248978	2.22982e-69	6.73043e-69	SORCS3
ENSG00000165502	0.248956	2.29247e-69	6.91601e-69	RPL36AL
ENSG00000109686	0.248793	2.82935e-69	8.53132e-69	SH3D19
ENSG00000171130	0.24875	2.99031e-69	9.01208e-69	ATP6V0E2
ENSG00000082146	0.248567	3.78833e-69	1.14113e-68	STRADB
ENSG00000147526	0.248397	4.71049e-69	1.41818e-68	TACC1
ENSG00000137692	0.248353	4.98978e-69	1.5015e-68	DCUN1D5
ENSG00000160145	0.248338	5.08241e-69	1.5286e-68	KALRN
ENSG00000198727	0.248277	5.50049e-69	1.6535e-68	MT-CYB
ENSG00000038382	-0.248258	5.63489e-69	1.69304e-68	TRIO
ENSG00000170802	0.248211	5.98595e-69	1.79761e-68	FOXN2
ENSG00000167196	0.248059	7.27992e-69	2.18509e-68	FBXO22
ENSG00000131966	0.247858	9.41602e-69	2.82481e-68	ACTR10
ENSG00000126216	0.247784	1.03626e-68	3.10722e-68	TUBGCP3
ENSG00000108239	0.24764	1.24497e-68	3.73114e-68	TBC1D12
ENSG00000157600	-0.247524	1.44564e-68	4.33032e-68	TMEM164
ENSG00000153560	0.247506	1.47886e-68	4.42761e-68	UBP1
ENSG00000160633	0.24746	1.56799e-68	4.69206e-68	SAFB
ENSG00000118855	0.247394	1.70783e-68	5.10795e-68	MFSD1
ENSG00000113575	0.247376	1.74672e-68	5.2216e-68	PPP2CA
ENSG00000166004	0.247296	1.93471e-68	5.78066e-68	CEP295
ENSG00000160563	0.247019	2.75686e-68	8.23299e-68	MED27
ENSG00000133059	0.24701	2.79169e-68	8.33279e-68	DSTYK
ENSG00000160058	0.24692	3.13007e-68	9.3381e-68	BSDC1
ENSG00000115761	0.246836	3.48321e-68	1.03864e-67	NOL10
ENSG00000187742	0.246676	4.27696e-68	1.27468e-67	SECISBP2
ENSG00000090615	0.246672	4.29582e-68	1.27966e-67	GOLGA3
ENSG00000198919	0.246554	4.99625e-68	1.48755e-67	DZIP3
ENSG00000149089	0.246509	5.28752e-68	1.57348e-67	APIP
ENSG00000172785	0.24649	5.42024e-68	1.61217e-67	CBWD1
ENSG00000122068	0.246484	5.46246e-68	1.62391e-67	FYTTD1
ENSG00000092201	0.246394	6.12313e-68	1.8194e-67	SUPT16H
ENSG00000116001	0.246179	8.05365e-68	2.39182e-67	TIA1
ENSG00000067992	0.246049	9.51104e-68	2.82323e-67	PDK3
ENSG00000102181	0.245981	1.03695e-67	3.07652e-67	CD99L2
ENSG00000122958	0.245904	1.14317e-67	3.38995e-67	VPS26A
ENSG00000101391	0.245899	1.15053e-67	3.41007e-67	CDK5RAP1
ENSG00000164944	0.245816	1.27866e-67	3.78793e-67	VIRMA
ENSG00000285331	0.245761	1.37108e-67	4.05969e-67	AC090517.5
ENSG00000141127	0.245704	1.47453e-67	4.36382e-67	PRPSAP2
ENSG00000164332	0.245601	1.67968e-67	4.96846e-67	UBLCP1
[truncated: 3,914 more rows]

## Sheet: CytoTrace_NCI_Correlation_Peaks
ID	rho	p.value	q.value	Promoter (2 kb upstream to 2 kb downstream)	Gene Body
chr4:7067776-7068679	0.144934	3.65928e-24	3.34824e-21	ENSG00000109519_GRPEL1,0	ENSG00000109519_GRPEL1,0
chr14:52552233-52553145	0.129609	1.32377e-19	5.69421e-17	ENSG00000087301_TXNDC16,0;ENSG00000180998_GPR137C,0	ENSG00000087301_TXNDC16,0;ENSG00000180998_GPR137C,0
chr16:30370501-30371352	0.129037	1.91422e-19	5.69421e-17	ENSG00000169221_TBC1D10B,-7;ENSG00000180209_MYLPF,0	ENSG00000180209_MYLPF,0
chr19:40777789-40778687	0.128414	2.85464e-19	5.69421e-17	ENSG00000167578_RAB4B,0	ENSG00000167578_RAB4B,0
chr4:15001856-15002709	0.128279	3.11159e-19	5.69421e-17	ENSG00000247624_CPEB2-DT,0;ENSG00000137449_CPEB2,0	ENSG00000247624_CPEB2-DT,0;ENSG00000137449_CPEB2,0
chr16:30065157-30066015	0.12763	4.70894e-19	7.18114e-17	ENSG00000274904_AC093512.1,-332;ENSG00000149925_ALDOA,993	ENSG00000149925_ALDOA,993;ENSG00000285043_AC093512.2,12067
chr21:36156133-36157040	0.127281	5.87634e-19	7.68121e-17	ENSG00000142197_DOP1B,0	ENSG00000142197_DOP1B,0;ENSG00000236830_CBR3-AS1,18775
chr4:42656790-42657699	0.12602	1.30223e-18	1.48942e-16	ENSG00000124406_ATP8A1,0;ENSG00000260519_AC096734.2,0	ENSG00000124406_ATP8A1,0;ENSG00000260519_AC096734.2,0
chr8:124997933-124998844	0.125304	2.03982e-18	2.07382e-16	ENSG00000253513_AC009908.1,0;ENSG00000104549_SQLE,0	ENSG00000253513_AC009908.1,0;ENSG00000104549_SQLE,0
chr2:207165924-207166722	0.12436	3.66802e-18	3.35624e-16	ENSG00000229647_MYOSLID,0;ENSG00000118263_KLF7,545	ENSG00000229647_MYOSLID,0;ENSG00000118263_KLF7,545
chr2:48314039-48314920	0.123905	4.86055e-18	4.04309e-16	ENSG00000230773_AC092650.1,0;ENSG00000170802_FOXN2,0	ENSG00000230773_AC092650.1,0;ENSG00000170802_FOXN2,0
chr3:50299056-50299972	0.123548	6.05736e-18	4.61873e-16	ENSG00000186792_HYAL3,0;ENSG00000243477_NAA80,0	ENSG00000186792_HYAL3,0;ENSG00000243477_NAA80,0;ENSG00000114378_HYAL1,12409
chr18:9136328-9137087	0.122567	1.10557e-17	7.78153e-16	ENSG00000266053_NDUFV2-AS1,0;ENSG00000101745_ANKRD12,100	ENSG00000266053_NDUFV2-AS1,0;ENSG00000101745_ANKRD12,100
chr3:150546150-150547041	0.122296	1.3042e-17	8.52386e-16	ENSG00000144895_EIF2A,0	ENSG00000144895_EIF2A,0;ENSG00000120742_SERP1,56187
chr9:35657707-35658572	0.121693	1.88125e-17	1.14756e-15	ENSG00000269900_RMRP,0;ENSG00000159884_CCDC107,0	ENSG00000269900_RMRP,0;ENSG00000159884_CCDC107,0
chr9:75087882-75088768	0.119522	6.93658e-17	3.96686e-15	ENSG00000106733_NMRK1,0;ENSG00000134996_OSTF1,0	ENSG00000106733_NMRK1,0;ENSG00000134996_OSTF1,0
chr3:38024621-38025429	0.119175	8.52504e-17	4.34149e-15		ENSG00000187091_PLCD1,4333
chr9:137240625-137241472	0.119172	8.54064e-17	4.34149e-15	ENSG00000188229_TUBB4B,0	ENSG00000188229_TUBB4B,0
chr6:152982908-152983718	0.118434	1.32236e-16	6.36818e-15	ENSG00000227627_AL080276.2,0;ENSG00000112029_FBXO5,0	ENSG00000112029_FBXO5,0;ENSG00000227627_AL080276.2,0
chr2:96857677-96858577	0.118345	1.39332e-16	6.37446e-15	ENSG00000163126_ANKRD23,0;ENSG00000213337_ANKRD39,0	ENSG00000163126_ANKRD23,0;ENSG00000213337_ANKRD39,0
chr19:10568568-10569455	0.117943	1.76498e-16	7.69028e-15	ENSG00000129355_CDKN2D,0	ENSG00000129355_CDKN2D,0
chr19:4968431-4969358	0.117726	2.00489e-16	8.33852e-15	ENSG00000127663_KDM4B,0	ENSG00000127663_KDM4B,0
chr1:244834894-244835819	0.117546	2.2277e-16	8.5791e-15	ENSG00000287601_BX323046.2,0;ENSG00000203667_COX20,0	ENSG00000287601_BX323046.2,0;ENSG00000203667_COX20,0
chr14:105490557-105491459	0.117529	2.25025e-16	8.5791e-15	ENSG00000185347_TEDC1,702	ENSG00000185347_TEDC1,702
chr12:113220859-113221755	0.11742	2.39871e-16	8.77929e-15	ENSG00000186815_TPCN1,0;ENSG00000166578_IQCD,0	ENSG00000166578_IQCD,0;ENSG00000186815_TPCN1,0
chr19:50328838-50329766	0.116911	3.22855e-16	1.1362e-14	ENSG00000131408_NR1H2,0	ENSG00000131408_NR1H2,0;ENSG00000131398_KCNC3,3749
chr1:184754530-184755429	0.114445	1.33769e-15	4.5333e-14	ENSG00000116406_EDEM3,0	ENSG00000116406_EDEM3,0
chr3:150762885-150763753	0.114263	1.4832e-15	4.84689e-14	ENSG00000181788_SIAH2,0;ENSG00000244265_SIAH2-AS1,948	ENSG00000181788_SIAH2,0;ENSG00000244265_SIAH2-AS1,948
chrX:1452698-1453605	0.114133	1.59786e-15	5.04154e-14	ENSG00000169093_ASMTL,157	ENSG00000169093_ASMTL,157
chr19:7829461-7830395	0.114001	1.72208e-15	5.25234e-14	ENSG00000142459_EVI5L,0	ENSG00000142459_EVI5L,0
chr1:5992024-5992892	0.113673	2.07454e-15	6.11519e-14	ENSG00000131697_NPHP4,0;ENSG00000069424_KCNAB2,1097	ENSG00000131697_NPHP4,0;ENSG00000069424_KCNAB2,1097
chr1:16913612-16914520	0.113619	2.13864e-15	6.11519e-14		ENSG00000058453_CROCC,173339
chr17:82698356-82699279	0.113437	2.36996e-15	6.57124e-14	ENSG00000141542_RAB40B,0	ENSG00000141542_RAB40B,0
chr19:49877282-49878157	0.112232	4.66729e-15	1.25605e-13	ENSG00000104946_TBC1D17,0;ENSG00000039650_PNKP,194;ENSG00000204673_AKT1S1,302	ENSG00000104946_TBC1D17,0;ENSG00000039650_PNKP,194;ENSG00000204673_AKT1S1,302
chr7:138459752-138460623	0.111911	5.5838e-15	1.45977e-13	ENSG00000122779_TRIM24,0	ENSG00000122779_TRIM24,0
chr19:55654311-55655125	0.111636	6.50614e-15	1.65364e-13	ENSG00000063244_U2AF2,165	ENSG00000063244_U2AF2,165
chr3:31532029-31532967	0.111446	7.23027e-15	1.78803e-13	ENSG00000163527_STT3B,0	ENSG00000163527_STT3B,0
chr19:55599116-55599837	0.110997	9.2745e-15	2.2332e-13	ENSG00000171443_ZNF524,-185	ENSG00000179943_FIZ1,2133
chr10:102917733-102918606	0.110594	1.15878e-14	2.71869e-13	ENSG00000148842_CNNM2,0;ENSG00000286575_AL356608.3,0	ENSG00000286575_AL356608.3,0;ENSG00000148842_CNNM2,0
chr14:95534386-95535313	0.110318	1.34865e-14	3.08503e-13	ENSG00000247092_SNHG10,0;ENSG00000182512_GLRX5,883	ENSG00000247092_SNHG10,0;ENSG00000182512_GLRX5,883
chr2:231707856-231708779	0.109942	1.65825e-14	3.62042e-13	ENSG00000187514_PTMA,961	ENSG00000187514_PTMA,961
chr15:92882152-92883035	0.109938	1.66183e-14	3.62042e-13		ENSG00000272888_LINC01578,62612
chr16:57735098-57735992	0.109078	2.6572e-14	5.65427e-13	ENSG00000140854_KATNB1,0	ENSG00000140854_KATNB1,0
chr1:30717989-30718904	0.10892	2.894e-14	6.0182e-13	ENSG00000186056_MATN1-AS1,0	ENSG00000186056_MATN1-AS1,0;ENSG00000162510_MATN1,4681
chr12:103929728-103930522	0.1088	3.08973e-14	6.28244e-13	ENSG00000166598_HSP90B1,0	ENSG00000166598_HSP90B1,0
chr8:109539339-109540208	0.108698	3.26489e-14	6.49429e-13	ENSG00000147654_EBAG9,0	ENSG00000147654_EBAG9,0
chr5:119070614-119071508	0.108624	3.39796e-14	6.61518e-13	ENSG00000249494_AC008629.1,0	ENSG00000249494_AC008629.1,0;ENSG00000172869_DMXL1,32842
chr2:96265648-96266533	0.108507	3.62017e-14	6.90096e-13	ENSG00000135956_TMEM127,0;ENSG00000144021_CIAO1,0	ENSG00000135956_TMEM127,0;ENSG00000144021_CIAO1,0
chr1:156766936-156767845	0.108368	3.90374e-14	7.28963e-13	ENSG00000143321_HDGF,-11;ENSG00000287624_AL590666.5,1388	ENSG00000143294_PRCC,16326
chr14:104752440-104753377	0.108071	4.58188e-14	8.38484e-13	ENSG00000184990_SIVA1,0	ENSG00000184990_SIVA1,0
chr1:228165433-228166199	0.108021	4.70688e-14	8.4447e-13	ENSG00000203684_IBA57-DT,0;ENSG00000181873_IBA57,0	ENSG00000203684_IBA57-DT,0;ENSG00000181873_IBA57,0
chr13:67230069-67230927	0.107887	5.0568e-14	8.89803e-13	ENSG00000184226_PCDH9,0	ENSG00000184226_PCDH9,0
chr16:67806334-67807232	0.10723	7.19276e-14	1.24177e-12	ENSG00000141084_RANBP10,0;ENSG00000102904_TSNAXIP1,0	ENSG00000141084_RANBP10,0;ENSG00000102904_TSNAXIP1,0
chr11:75814563-75815503	0.106712	9.4821e-14	1.5925e-12	ENSG00000198382_UVRAG,0;ENSG00000255507_UVRAG-DT,0	ENSG00000255507_UVRAG-DT,0;ENSG00000198382_UVRAG,0
chr19:45178035-45178923	0.106694	9.57238e-14	1.5925e-12	ENSG00000007255_TRAPPC6A,0;ENSG00000189114_BLOC1S3,0	ENSG00000007255_TRAPPC6A,0;ENSG00000189114_BLOC1S3,0;ENSG00000007047_MARK4,98747
chr10:16817106-16818026	0.106264	1.20295e-13	1.96554e-12	ENSG00000148484_RSU1,0;ENSG00000286958_AL365215.2,0	ENSG00000148484_RSU1,0;ENSG00000286958_AL365215.2,0
chr13:110715142-110716059	0.106053	1.34489e-13	2.15891e-12	ENSG00000134905_CARS2,-1539	ENSG00000153487_ING1,2406
chr3:51941670-51942568	0.105784	1.54995e-13	2.44517e-12	ENSG00000114767_RRP9,0;ENSG00000041880_PARP3,0	ENSG00000114767_RRP9,0;ENSG00000041880_PARP3,0
chr1:9909992-9910922	0.105498	1.80178e-13	2.77737e-12	ENSG00000178585_CTNNBIP1,0	ENSG00000178585_CTNNBIP1,0
chr16:30377871-30378700	0.105478	1.82123e-13	2.77737e-12	ENSG00000180035_ZNF48,0	ENSG00000180035_ZNF48,0;ENSG00000180209_MYLPF,6937;ENSG00000180096_SEPTIN1,17291
chr1:62436099-62436969	0.105407	1.89003e-13	2.83504e-12	ENSG00000162607_USP1,0	ENSG00000162607_USP1,0
chr7:112450086-112450810	0.105319	1.97994e-13	2.92201e-12		ENSG00000006652_IFRD1,27118
chr17:63621729-63622615	0.105008	2.33065e-13	3.38139e-12	ENSG00000198909_MAP3K3,0	ENSG00000198909_MAP3K3,0
chr19:54136940-54137866	0.10498	2.36512e-13	3.38139e-12	ENSG00000088038_CNOT3,0	ENSG00000088038_CNOT3,0
chr11:106021889-106022808	0.104811	2.58404e-13	3.63753e-12	ENSG00000170903_MSANTD4,0	ENSG00000170903_MSANTD4,0
chr6:108559229-108560125	0.104633	2.83475e-13	3.93e-12	ENSG00000287044_AL139106.1,-943;ENSG00000118689_FOXO3,0	ENSG00000118689_FOXO3,0
chr5:160119163-160120049	0.10438	3.23529e-13	4.41834e-12	ENSG00000170234_PWWP2A,0	ENSG00000170234_PWWP2A,0
chr11:119095101-119095920	0.104018	3.90457e-13	5.25395e-12	ENSG00000188486_H2AFX,0	ENSG00000188486_H2AFX,0
chr11:66288757-66289651	0.10393	4.08501e-13	5.41708e-12	ENSG00000174851_YIF1A,0	ENSG00000174851_YIF1A,0
chr4:2261870-2262768	0.103891	4.16837e-13	5.44865e-12	ENSG00000123933_MXD4,0	ENSG00000123933_MXD4,0
chr14:50311909-50312812	0.103462	5.20476e-13	6.70755e-12	ENSG00000087299_L2HGDH,0;ENSG00000125375_DMAC2L,0	ENSG00000087299_L2HGDH,0;ENSG00000125375_DMAC2L,0
chr14:81220694-81221554	0.103303	5.64833e-13	7.17809e-12	ENSG00000273783_AL136040.1,0;ENSG00000165417_GTF2A1,0	ENSG00000165417_GTF2A1,0;ENSG00000273783_AL136040.1,0
chr7:120950422-120951267	0.103255	5.79057e-13	7.25804e-12	ENSG00000071243_ING3,0	ENSG00000071243_ING3,0
chr19:55339092-55340012	0.10313	6.17619e-13	7.63678e-12	ENSG00000276831_AC020922.4,0;ENSG00000133247_KMT5C,0	ENSG00000276831_AC020922.4,0;ENSG00000133247_KMT5C,0
chr12:50111493-50112398	0.103033	6.48954e-13	7.91724e-12	ENSG00000178449_COX14,0;ENSG00000272368_AC074032.1,0	ENSG00000178449_COX14,0;ENSG00000272368_AC074032.1,0
chr16:28950395-28951304	0.102489	8.57896e-13	1.03286e-11	ENSG00000176953_NFATC2IP,0	ENSG00000176953_NFATC2IP,0
chr6:32195367-32196256	0.102447	8.76516e-13	1.0408e-11	ENSG00000213654_GPSM3,0	ENSG00000213654_GPSM3,0;ENSG00000204301_NOTCH4,27811
chr3:195442700-195443601	0.102423	8.87242e-13	1.0408e-11	ENSG00000114331_ACAP2,0	ENSG00000114331_ACAP2,0
chr16:18801233-18802142	0.102392	9.0127e-13	1.04388e-11	ENSG00000260017_AC138811.1,-941;ENSG00000170540_ARL6IP1,0	ENSG00000170540_ARL6IP1,0
chr12:26937846-26938746	0.102361	9.15806e-13	1.04427e-11	ENSG00000064102_INTS13,0;ENSG00000111790_FGFR1OP2,0	ENSG00000064102_INTS13,0;ENSG00000111790_FGFR1OP2,0
chr14:77616365-77617252	0.102343	9.2444e-13	1.04427e-11	ENSG00000100596_SPTLC2,0	ENSG00000100596_SPTLC2,0
chr6:31815050-31815860	0.102314	9.38235e-13	1.04693e-11	ENSG00000204390_HSPA1L,0;ENSG00000204389_HSPA1A,0	ENSG00000204390_HSPA1L,0;ENSG00000204389_HSPA1A,0
chr19:45691948-45692805	0.102256	9.66337e-13	1.0653e-11	ENSG00000125743_SNRPD2,0;ENSG00000011478_QPCTL,0	ENSG00000125743_SNRPD2,0;ENSG00000011478_QPCTL,0
chr1:211578859-211579778	0.101963	1.12176e-12	1.22192e-11	ENSG00000170385_SLC30A1,0	ENSG00000170385_SLC30A1,0
chr8:66666908-66667816	0.101724	1.26635e-12	1.36319e-11	ENSG00000175073_VCPIP1,0;ENSG00000104205_SGK3,0	ENSG00000175073_VCPIP1,0;ENSG00000104205_SGK3,0
chr14:23301328-23302233	0.101165	1.68017e-12	1.78762e-11	ENSG00000215271_HOMEZ,-1881;ENSG00000235194_PPP1R3E,626	ENSG00000235194_PPP1R3E,626;ENSG00000129473_BCL2L2,2538
chr11:2400058-2400958	0.100989	1.8364e-12	1.93139e-11	ENSG00000184281_TSSC4,0	ENSG00000184281_TSSC4,0
chr8:140464245-140465118	0.100949	1.87334e-12	1.94785e-11
chr20:31723226-31724124	0.100796	2.02409e-12	2.08094e-11	ENSG00000171552_BCL2L1,0;ENSG00000281376_ABALON,1719	ENSG00000171552_BCL2L1,0;ENSG00000281376_ABALON,1719
chr2:112645355-112646278	0.100739	2.08293e-12	2.11764e-11	ENSG00000237753_AC079922.2,0;ENSG00000144136_SLC20A1,0	ENSG00000237753_AC079922.2,0;ENSG00000144136_SLC20A1,0
chr20:325133-325930	0.100644	2.18447e-12	2.19647e-11	ENSG00000177732_SOX12,0	ENSG00000177732_SOX12,0;ENSG00000225377_NRSN2-AS1,22560
chr12:122225752-122226671	0.100581	2.25399e-12	2.24174e-11	ENSG00000184047_DIABLO,785;ENSG00000284934_AC048338.2,863	ENSG00000184047_DIABLO,785;ENSG00000284934_AC048338.2,863
chr7:123534403-123535287	0.100476	2.37628e-12	2.33795e-11	ENSG00000164675_IQUB,0	ENSG00000164675_IQUB,0
chr2:241315149-241315818	0.10035	2.53062e-12	2.44444e-11	ENSG00000168385_SEPTIN2,49;ENSG00000115677_HDLBP,1243	ENSG00000168385_SEPTIN2,49;ENSG00000115677_HDLBP,1243
chr6:53359021-53359950	0.100345	2.53794e-12	2.44444e-11
chr7:112206065-112206974	0.100311	2.58168e-12	2.46067e-11	ENSG00000128512_DOCK4,0;ENSG00000198839_ZNF277,0	ENSG00000128512_DOCK4,0;ENSG00000198839_ZNF277,0
chr20:17682009-17682904	0.100262	2.64492e-12	2.47633e-11	ENSG00000125844_RRBP1,0	ENSG00000125844_RRBP1,0
chr16:589386-590173	0.100257	2.65224e-12	2.47633e-11	ENSG00000197562_RAB40C,29	ENSG00000197562_RAB40C,29
chr12:76084352-76085252	0.100217	2.70605e-12	2.50095e-11	ENSG00000187109_NAP1L1,0	ENSG00000187109_NAP1L1,0
chr19:48618878-48619788	0.100196	2.73328e-12	2.50095e-11	ENSG00000063177_RPL18,0;ENSG00000063176_SPHK2,0	ENSG00000063177_RPL18,0;ENSG00000063176_SPHK2,0;ENSG00000268093_AC022154.1,4344
chr8:92965457-92966322	0.100155	2.78987e-12	2.52652e-11		ENSG00000205133_TRIQK,51351;ENSG00000253197_AC117834.1,82473
chr16:46688917-46689802	0.100136	2.81645e-12	2.52652e-11	ENSG00000069329_VPS35,0;ENSG00000091651_ORC6,0	ENSG00000069329_VPS35,0;ENSG00000091651_ORC6,0
chr11:63838543-63839422	0.0998948	3.17751e-12	2.82274e-11	ENSG00000072518_MARK2,0	ENSG00000072518_MARK2,0
chr2:130342339-130343120	0.099864	3.22655e-12	2.83875e-11	ENSG00000136710_CCDC115,0;ENSG00000136718_IMP4,114	ENSG00000136710_CCDC115,0;ENSG00000136718_IMP4,114
chr4:82900333-82901255	0.0994999	3.86708e-12	3.36989e-11	ENSG00000168152_THAP9,0;ENSG00000251022_THAP9-AS1,0;ENSG00000138674_SEC31A,0	ENSG00000138674_SEC31A,0;ENSG00000251022_THAP9-AS1,0;ENSG00000168152_THAP9,0
chr7:75738778-75739696	0.0993736	4.11724e-12	3.55403e-11	ENSG00000127946_HIP1,0	ENSG00000127946_HIP1,0
chr11:106077011-106077908	0.0989963	4.96244e-12	4.24358e-11	ENSG00000182359_KBTBD3,0;ENSG00000149313_AASDHPPT,1510	ENSG00000182359_KBTBD3,0;ENSG00000149313_AASDHPPT,1510
chr1:186375040-186375986	0.0989655	5.03851e-12	4.26874e-11	ENSG00000047410_TPR,0;ENSG00000157181_ODR4,0	ENSG00000047410_TPR,0;ENSG00000157181_ODR4,0
chr22:41285879-41286767	0.0987212	5.68393e-12	4.73819e-11	ENSG00000100401_RANGAP1,0	ENSG00000100401_RANGAP1,0
chr19:42075574-42076493	0.0987168	5.69618e-12	4.73819e-11		ENSG00000105732_ZNF574,7097
chr14:91060383-91061248	0.0986973	5.75117e-12	4.74083e-11	ENSG00000100784_RPS6KA5,0;ENSG00000133943_DGLUCY,50	ENSG00000100784_RPS6KA5,0;ENSG00000133943_DGLUCY,50
chr17:7572198-7573084	0.0985796	6.09412e-12	4.97868e-11	ENSG00000161960_EIF4A1,0	ENSG00000161960_EIF4A1,0
chr19:4471471-4472407	0.0985519	6.17784e-12	5.00241e-11	ENSG00000267011_AC011498.1,0;ENSG00000167674_HDGFL2,0	ENSG00000267011_AC011498.1,0;ENSG00000167674_HDGFL2,0
chr19:58572969-58573649	0.0984989	6.3408e-12	5.08933e-11	ENSG00000099326_MZF1,0	ENSG00000099326_MZF1,0;ENSG00000267858_MZF1-AS1,13840
chr22:38705253-38706133	0.0983415	6.85068e-12	5.45076e-11	ENSG00000100226_GTPBP1,0	ENSG00000100226_GTPBP1,0
chr3:27484040-27484921	0.0982987	6.99595e-12	5.49157e-11	ENSG00000033867_SLC4A7,0	ENSG00000033867_SLC4A7,0
chr5:68215159-68216063	0.0982911	7.02201e-12	5.49157e-11	ENSG00000145675_PIK3R1,0	ENSG00000145675_PIK3R1,0
chr11:59615602-59616479	0.098168	7.4588e-12	5.78373e-11	ENSG00000110048_OSBP,0	ENSG00000110048_OSBP,0;ENSG00000255139_AP000442.1,49679
chr1:226939675-226940538	0.0980762	7.80195e-12	5.99898e-11		ENSG00000163050_COQ8A,42139
chr15:64162725-64163639	0.0980404	7.93975e-12	6.05406e-11	ENSG00000166794_PPIB,0	ENSG00000166794_PPIB,0
chr8:30082715-30083588	0.0979433	8.32615e-12	6.29622e-11	ENSG00000272256_AC044849.1,0;ENSG00000133872_SARAF,0	ENSG00000133872_SARAF,0;ENSG00000272256_AC044849.1,0
chr7:151057628-151058546	0.0979243	8.40375e-12	6.30281e-11	ENSG00000164885_CDK5,0;ENSG00000164889_SLC4A2,418	ENSG00000164885_CDK5,0;ENSG00000164889_SLC4A2,418
chr12:120686318-120687206	0.0978294	8.80229e-12	6.54804e-11	ENSG00000110917_MLEC,0	ENSG00000110917_MLEC,0
chr12:45728653-45729458	0.0977953	8.95028e-12	6.60444e-11	ENSG00000273015_AC008124.1,-878;ENSG00000189079_ARID2,-248
chr19:42268466-42269218	0.0976335	9.6851e-12	7.08949e-11	ENSG00000079432_CIC,0	ENSG00000079432_CIC,0
chr9:79571237-79572128	0.0976045	9.82298e-12	7.13335e-11	ENSG00000106829_TLE4,0	ENSG00000106829_TLE4,0
chr9:127396524-127397450	0.0975477	1.00986e-11	7.25499e-11	ENSG00000136856_SLC2A8,0	ENSG00000136856_SLC2A8,0
chr17:77958042-77958964	0.0975374	1.01491e-11	7.25499e-11	ENSG00000078687_TNRC6C,-276
chr20:41136744-41137615	0.0973414	1.11645e-11	7.91899e-11	ENSG00000124181_PLCG1,0;ENSG00000226648_PLCG1-AS1,388	ENSG00000124181_PLCG1,0;ENSG00000226648_PLCG1-AS1,388
chr17:28041080-28041945	0.09721	1.19001e-11	8.37586e-11	ENSG00000087095_NLK,0	ENSG00000087095_NLK,0
chr19:7943399-7944290	0.097018	1.30608e-11	9.05796e-11	ENSG00000104980_TIMM44,0;ENSG00000286138_AC010336.8,0	ENSG00000104980_TIMM44,0;ENSG00000286138_AC010336.8,0
chr7:55365604-55366526	0.097017	1.30672e-11	9.05796e-11	ENSG00000132434_LANCL2,156	ENSG00000132434_LANCL2,156
chr11:73760783-73761681	0.0968509	1.4161e-11	9.74232e-11	ENSG00000175582_RAB6A,0;ENSG00000256034_AP002770.1,220	ENSG00000175582_RAB6A,0;ENSG00000256034_AP002770.1,220
chr17:50866017-50866925	0.0967069	1.51814e-11	1.03664e-10	ENSG00000229980_TOB1-AS1,0;ENSG00000141232_TOB1,1053	ENSG00000229980_TOB1-AS1,0;ENSG00000141232_TOB1,1053
chr11:9460493-9461335	0.096644	1.56494e-11	1.06068e-10	ENSG00000268403_AC132192.2,0;ENSG00000166478_ZNF143,174	ENSG00000268403_AC132192.2,0;ENSG00000166478_ZNF143,174
chr22:50507506-50508451	0.096496	1.68068e-11	1.12303e-10	ENSG00000100258_LMF2,0;ENSG00000025770_NCAPH2,0	ENSG00000100258_LMF2,0;ENSG00000025770_NCAPH2,0
chr11:10808581-10809501	0.096495	1.68148e-11	1.12303e-10	ENSG00000110321_EIF4G2,0;ENSG00000246308_AC116535.1,0	ENSG00000110321_EIF4G2,0;ENSG00000246308_AC116535.1,0
chr9:83980027-83980912	0.0961966	1.94098e-11	1.28696e-10	ENSG00000165119_HNRNPK,0;ENSG00000178966_RMI1,0	ENSG00000165119_HNRNPK,0;ENSG00000178966_RMI1,0
chr19:46660862-46661775	0.0961513	1.98364e-11	1.30578e-10	ENSG00000197380_DACT3,0;ENSG00000245598_DACT3-AS1,498	ENSG00000197380_DACT3,0;ENSG00000245598_DACT3-AS1,498
chr11:62753739-62754629	0.0959011	2.23647e-11	1.46169e-10	ENSG00000185670_ZBTB3,0	ENSG00000185670_ZBTB3,0
chr1:42766675-42767578	0.0958813	2.25787e-11	1.46521e-10	ENSG00000117385_P3H1,0;ENSG00000164008_C1orf50,0	ENSG00000117385_P3H1,0;ENSG00000164008_C1orf50,0
chr6:166627013-166627909	0.095857	2.28428e-11	1.47191e-10		ENSG00000071242_RPS6KA2,278542
chr17:76737177-76737955	0.095824	2.32065e-11	1.48489e-10	ENSG00000161547_SRSF2,0;ENSG00000092931_MFSD11,1312	ENSG00000161547_SRSF2,0;ENSG00000092931_MFSD11,1312
chr12:92145574-92146488	0.0957674	2.38429e-11	1.51502e-10	ENSG00000133639_BTG1,0;ENSG00000245904_AC025164.1,1	ENSG00000133639_BTG1,0;ENSG00000245904_AC025164.1,1
chr5:75336643-75337543	0.0956371	2.53744e-11	1.60121e-10	ENSG00000247372_AC008897.2,0;ENSG00000113161_HMGCR,314	ENSG00000247372_AC008897.2,0;ENSG00000113161_HMGCR,314
chr3:49093803-49094639	0.0955508	2.6442e-11	1.65715e-10	ENSG00000198218_QRICH1,0	ENSG00000198218_QRICH1,0
chr21:45642933-45643877	0.0954742	2.74256e-11	1.70711e-10	ENSG00000183570_PCBP3,0	ENSG00000183570_PCBP3,0
chr4:107719888-107720785	0.094944	3.52894e-11	2.18174e-10	ENSG00000138801_PAPSS1,0	ENSG00000138801_PAPSS1,0
chr1:169893513-169894506	0.094782	3.81053e-11	2.34002e-10	ENSG00000000457_SCYL3,0	ENSG00000000457_SCYL3,0
chr22:21735492-21736425	0.0944732	4.40924e-11	2.67795e-10	ENSG00000100027_YPEL1,0	ENSG00000100027_YPEL1,0
chr2:240560741-240561445	0.0944684	4.41935e-11	2.67795e-10	ENSG00000188542_DUSP28,687	ENSG00000188542_DUSP28,687;ENSG00000144504_ANKMY1,7764
chr5:173887701-173888554	0.094373	4.62271e-11	2.78275e-10	ENSG00000113742_CPEB4,0	ENSG00000113742_CPEB4,0
chr5:172770808-172771630	0.0941547	5.12319e-11	3.06387e-10	ENSG00000120129_DUSP1,0	ENSG00000120129_DUSP1,0;ENSG00000253736_AC022217.3,7828
chr14:63641625-63642515	0.0939198	5.72087e-11	3.39909e-10	ENSG00000140006_WDR89,0;ENSG00000274015_AL136038.5,0	ENSG00000140006_WDR89,0;ENSG00000274015_AL136038.5,0
chr12:6470375-6471302	0.0937888	6.08316e-11	3.59103e-10	ENSG00000139190_VAMP1,0	ENSG00000139190_VAMP1,0
chr4:128287544-128288488	0.0937624	6.15884e-11	3.6124e-10	ENSG00000164040_PGRMC2,341	ENSG00000164040_PGRMC2,341
chr4:6269276-6270185	0.0936169	6.59287e-11	3.84234e-10	ENSG00000109501_WFS1,0	ENSG00000109501_WFS1,0
chr2:88627167-88628102	0.093376	7.37839e-11	4.27293e-10	ENSG00000172071_EIF2AK3,0;ENSG00000234028_EIF2AK3-DT,0	ENSG00000172071_EIF2AK3,0;ENSG00000234028_EIF2AK3-DT,0
chr17:60677234-60678108	0.0932965	7.65687e-11	4.40631e-10	ENSG00000141376_BCAS3,0	ENSG00000141376_BCAS3,0
chr10:130110462-130111234	0.0932359	7.87624e-11	4.50422e-10	ENSG00000237489_C10orf143,0	ENSG00000237489_C10orf143,0
chr3:160755014-160755930	0.0929775	8.88226e-11	5.04799e-10	ENSG00000260572_AC069224.1,0;ENSG00000163590_PPM1L,0	ENSG00000260572_AC069224.1,0;ENSG00000163590_PPM1L,0
chr17:4710004-4710893	0.0927486	9.87777e-11	5.57911e-10	ENSG00000141480_ARRB2,0	ENSG00000141480_ARRB2,0
chr16:56931620-56932523	0.0926675	1.02561e-10	5.75727e-10	ENSG00000051108_HERPUD1,0	ENSG00000051108_HERPUD1,0
chr7:77536587-77537463	0.0925911	1.06254e-10	5.92819e-10	ENSG00000127947_PTPN12,0	ENSG00000127947_PTPN12,0
chr9:137200410-137201315	0.0925597	1.07807e-10	5.97837e-10		ENSG00000176058_TPRN,2878
chr3:13479775-13480593	0.0924374	1.14078e-10	6.28803e-10	ENSG00000244502_HDAC11-AS1,0;ENSG00000163517_HDAC11,51	ENSG00000244502_HDAC11-AS1,0;ENSG00000163517_HDAC11,51
chr16:30657911-30658697	0.0924084	1.15615e-10	6.33457e-10	ENSG00000156860_FBRS,0	ENSG00000156860_FBRS,0
chr9:4792354-4793262	0.0923295	1.19904e-10	6.53047e-10	ENSG00000120158_RCL1,0	ENSG00000120158_RCL1,0
chr11:20387076-20387990	0.0922779	1.22792e-10	6.64821e-10	ENSG00000185238_PRMT3,0	ENSG00000185238_PRMT3,0
chr17:42388155-42389085	0.0920481	1.36503e-10	7.34706e-10	ENSG00000168610_STAT3,0	ENSG00000168610_STAT3,0
chr19:4791079-4792009	0.0919889	1.40272e-10	7.50577e-10	ENSG00000268536_AC005523.1,0;ENSG00000141965_FEM1A,0	ENSG00000268536_AC005523.1,0;ENSG00000141965_FEM1A,0;ENSG00000269604_AC005523.2,3550
chr19:40750367-40751221	0.0919025	1.45951e-10	7.76423e-10	ENSG00000077312_SNRPA,0;ENSG00000188493_C19orf54,332	ENSG00000077312_SNRPA,0;ENSG00000188493_C19orf54,332
chr8:100721924-100722794	0.0917592	1.55879e-10	8.2196e-10	ENSG00000070756_PABPC1,15	ENSG00000070756_PABPC1,15
chr7:7182171-7183020	0.0917532	1.56307e-10	8.2196e-10		ENSG00000106392_C1GALT1,25237
chr14:35826050-35826829	0.0914232	1.81799e-10	9.50549e-10	ENSG00000100916_BRMS1L,0;ENSG00000258938_AL162311.3,0	ENSG00000258938_AL162311.3,0;ENSG00000100916_BRMS1L,0
chr18:21740435-21741228	0.0913704	1.86238e-10	9.68228e-10		ENSG00000101752_MIB1,35478
chr17:82022638-82023561	0.0912328	1.98315e-10	1.02519e-09	ENSG00000169683_LRRC45,0;ENSG00000169689_CENPX,546	ENSG00000169683_LRRC45,0;ENSG00000169689_CENPX,546
chr11:108222424-108223336	0.0911827	2.02892e-10	1.04295e-09	ENSG00000149311_ATM,0;ENSG00000149308_NPAT,0	ENSG00000149308_NPAT,0;ENSG00000149311_ATM,0
chr15:42575023-42575922	0.0911118	2.09552e-10	1.07118e-09	ENSG00000159433_STARD9,0	ENSG00000159433_STARD9,0
chr8:143246258-143247168	0.0910651	2.14064e-10	1.08816e-09	ENSG00000181638_ZFP41,0	ENSG00000181638_ZFP41,0
chr14:65412225-65413076	0.0910087	2.19626e-10	1.11027e-09	ENSG00000276116_FUT8-AS1,0;ENSG00000033170_FUT8,1633	ENSG00000276116_FUT8-AS1,0;ENSG00000033170_FUT8,1633
chr19:36054055-36055007	0.0909719	2.23339e-10	1.12216e-09	ENSG00000161277_THAP8,0;ENSG00000075702_WDR62,0	ENSG00000161277_THAP8,0;ENSG00000075702_WDR62,0
chr9:37465224-37466103	0.0909611	2.24432e-10	1.12216e-09	ENSG00000168795_ZBTB5,0	ENSG00000168795_ZBTB5,0
chr7:2843968-2844873	0.090922	2.28461e-10	1.13609e-09	ENSG00000146535_GNA12,0	ENSG00000146535_GNA12,0
chr19:45584190-45585145	0.0903204	3.00064e-10	1.48315e-09		ENSG00000125741_OPA3,17067
chr7:39949248-39950115	0.0903076	3.01793e-10	1.48315e-09	ENSG00000065883_CDK13,-6;ENSG00000259826_AC072061.1,0	ENSG00000259826_AC072061.1,0
chr17:48892122-48893056	0.090298	3.03114e-10	1.48315e-09	ENSG00000159199_ATP5MC1,0	ENSG00000159199_ATP5MC1,0
chr19:41859494-41860424	0.0902033	3.16347e-10	1.53967e-09	ENSG00000105372_RPS19,0	ENSG00000105372_RPS19,0
chr17:17972153-17973087	0.0901195	3.28532e-10	1.59051e-09	ENSG00000175662_TOM1L2,0;ENSG00000171962_DRC3,0	ENSG00000175662_TOM1L2,0;ENSG00000171962_DRC3,0
chr5:41903735-41904662	0.0900796	3.34489e-10	1.60945e-09	ENSG00000205765_C5orf51,0	ENSG00000205765_C5orf51,0
chr17:7614617-7615488	0.0900698	3.35961e-10	1.60945e-09	ENSG00000129245_FXR2,0;ENSG00000129214_SHBG,671	ENSG00000129245_FXR2,0;ENSG00000129214_SHBG,671
chr14:21269188-21270117	0.0900562	3.3803e-10	1.61093e-09	ENSG00000092199_HNRNPC,0	ENSG00000092199_HNRNPC,0
chr10:132537117-132538024	0.0900398	3.40533e-10	1.61444e-09	ENSG00000068383_INPP5A,0	ENSG00000068383_INPP5A,0
chr2:36966231-36967129	0.0898758	3.66614e-10	1.72913e-09	ENSG00000115808_STRN,0	ENSG00000115808_STRN,0
chr19:52189541-52190394	0.0897664	3.85088e-10	1.80695e-09	ENSG00000105568_PPP2R1A,0	ENSG00000105568_PPP2R1A,0
chr6:134174600-134175448	0.0897255	3.92219e-10	1.83102e-09		ENSG00000118515_SGK1,142664
chr10:74826001-74826842	0.0896868	3.99095e-10	1.85367e-09	ENSG00000156650_KAT6B,1074	ENSG00000156650_KAT6B,1074
chr19:1268861-1269699	0.0896412	4.07336e-10	1.88239e-09	ENSG00000267493_CIRBP-AS1,561	ENSG00000267493_CIRBP-AS1,561;ENSG00000099622_CIRBP,9477
chrX:318568-319366	0.0896184	4.11529e-10	1.89221e-09	ENSG00000226179_LINC00685,-1624;ENSG00000178605_GTPBP6,0	ENSG00000178605_GTPBP6,0
chr11:67401412-67402294	0.0895634	4.21798e-10	1.92973e-09	ENSG00000175463_TBC1D10C,-1621	ENSG00000172531_PPP1CA,18889
chr19:5904166-5904995	0.0895137	4.31284e-10	1.96331e-09	ENSG00000174886_NDUFA11,-160;ENSG00000187650_VMAC,0	ENSG00000187650_VMAC,0
chr5:173056753-173057624	0.0893714	4.59629e-10	2.08138e-09	ENSG00000164463_CREBRF,401	ENSG00000164463_CREBRF,401
chr13:19958185-19959090	0.089361	4.61771e-10	2.08138e-09	ENSG00000121741_ZMYM2,0	ENSG00000121741_ZMYM2,0
chr18:67516440-67517337	0.0892398	4.87464e-10	2.18428e-09	ENSG00000265533_AC114689.3,0;ENSG00000171451_DSEL,0	ENSG00000171451_DSEL,0;ENSG00000265533_AC114689.3,0
chr16:46390102-46390969	0.0892311	4.89375e-10	2.18428e-09
chr3:45688805-45689741	0.089198	4.96659e-10	2.20603e-09	ENSG00000211456_SACM1L,0;ENSG00000230530_LIMD1-AS1,0	ENSG00000230530_LIMD1-AS1,0;ENSG00000211456_SACM1L,0
chr3:48556536-48557461	0.0890706	5.25686e-10	2.32369e-09		ENSG00000114268_PFKFB4,4554
chr6:2764842-2765772	0.0889773	5.47998e-10	2.41067e-09	ENSG00000124535_WRNIP1,0	ENSG00000124535_WRNIP1,0
chr22:30423616-30424487	0.0889386	5.57507e-10	2.44076e-09	ENSG00000099999_RNF215,-1845;ENSG00000242114_MTFP1,-1136	ENSG00000100003_SEC14L2,26675
chr3:14948002-14948841	0.0888621	5.76808e-10	2.51324e-09	ENSG00000225733_FGD5-AS1,0;ENSG00000177463_NR2C2,418	ENSG00000225733_FGD5-AS1,0;ENSG00000177463_NR2C2,418
chr3:93470142-93471054	-0.0887703	6.00814e-10	2.59069e-09
chr11:13668079-13668966	0.0887658	6.02035e-10	2.59069e-09	ENSG00000254791_FAR1-IT1,-361;ENSG00000197601_FAR1,0	ENSG00000197601_FAR1,0
chr13:49443703-49444618	0.0887619	6.03079e-10	2.59069e-09	ENSG00000102547_CAB39L,0;ENSG00000136169_SETDB2,0	ENSG00000102547_CAB39L,0;ENSG00000136169_SETDB2,0
chr12:53379489-53380340	0.0887459	6.07358e-10	2.59688e-09	ENSG00000185591_SP1,0	ENSG00000185591_SP1,0
chr2:240586136-240587074	0.0885095	6.74486e-10	2.87049e-09	ENSG00000260942_CAPN10-DT,0;ENSG00000142330_CAPN10,0	ENSG00000260942_CAPN10-DT,0;ENSG00000142330_CAPN10,0
chr18:62714825-62715727	0.0883153	7.3501e-10	3.11359e-09	ENSG00000081913_PHLPP1,0	ENSG00000081913_PHLPP1,0
chr19:49869181-49870100	0.0882748	7.483e-10	3.15527e-09		ENSG00000039650_PNKP,8251;ENSG00000204673_AKT1S1,8359
chr1:174999356-175000239	0.0881164	8.02462e-10	3.36157e-09	ENSG00000287697_Z99127.4,0;ENSG00000116161_CACYBP,193	ENSG00000287697_Z99127.4,0;ENSG00000116161_CACYBP,193
chr14:103715198-103716099	0.0881105	8.04572e-10	3.36157e-09	ENSG00000126215_XRCC3,0;ENSG00000100711_ZFYVE21,0	ENSG00000126215_XRCC3,0;ENSG00000100711_ZFYVE21,0
chr15:100601975-100602912	0.0880634	8.21442e-10	3.41645e-09	ENSG00000183475_ASB7,0;ENSG00000140471_LINS1,318	ENSG00000183475_ASB7,0;ENSG00000140471_LINS1,318
chr7:149028274-149029167	0.0880367	8.31171e-10	3.44127e-09	ENSG00000155660_PDIA4,0	ENSG00000155660_PDIA4,0
chr17:21213861-21214768	0.0879073	8.79877e-10	3.62652e-09	ENSG00000235530_AC087294.1,0;ENSG00000178307_TMEM11,0	ENSG00000178307_TMEM11,0;ENSG00000235530_AC087294.1,0
chr17:74872725-74873618	0.0878914	8.86067e-10	3.63566e-09	ENSG00000161513_FDXR,0	ENSG00000161513_FDXR,0
chr1:156500541-156501410	0.0878339	9.08773e-10	3.71217e-09	ENSG00000116604_MEF2D,0	ENSG00000116604_MEF2D,0
chr11:6234398-6235323	0.0877932	9.25182e-10	3.76241e-09	ENSG00000051009_FAM160A2,0;ENSG00000132259_CNGA4,0	ENSG00000051009_FAM160A2,0;ENSG00000132259_CNGA4,0
chr1:1307746-1308701	0.0877292	9.51535e-10	3.85245e-09	ENSG00000169972_PUSL1,0;ENSG00000131584_ACAP3,908	ENSG00000169972_PUSL1,0;ENSG00000131584_ACAP3,908
chr19:10870773-10871675	0.0876583	9.81623e-10	3.95676e-09	ENSG00000142453_CARM1,0	ENSG00000142453_CARM1,0
chr15:84748002-84748951	0.0876209	9.97877e-10	4.00464e-09	ENSG00000285667_AC012291.3,-1165;ENSG00000166716_ZNF592,0	ENSG00000166716_ZNF592,0
chr14:92793719-92794625	0.0875783	1.01666e-09	4.05841e-09	ENSG00000066455_GOLGA5,0	ENSG00000066455_GOLGA5,0
chr18:79679046-79679940	0.0875705	1.02015e-09	4.05841e-09	ENSG00000274828_AC068473.5,0;ENSG00000178412_AC068473.1,0;ENSG00000060069_CTDP1,0	ENSG00000178412_AC068473.1,0;ENSG00000274828_AC068473.5,0;ENSG00000060069_CTDP1,0
chr22:41091201-41092077	0.0874169	1.09114e-09	4.32203e-09	ENSG00000100393_EP300,-515
chr16:30922448-30923007	0.0873779	1.10992e-09	4.3775e-09	ENSG00000099364_FBXL19,-48;ENSG00000260852_FBXL19-AS1,262	ENSG00000260852_FBXL19-AS1,262
chr21:33641680-33642447	0.0872771	1.15994e-09	4.55514e-09	ENSG00000205726_ITSN1,0;ENSG00000205758_CRYZL1,1479	ENSG00000205726_ITSN1,0;ENSG00000205758_CRYZL1,1479
chr21:42495974-42496884	0.0871082	1.24868e-09	4.88267e-09	ENSG00000160190_SLC37A1,0;ENSG00000160188_RSPH1,0;ENSG00000239930_AP001625.3,0	ENSG00000160188_RSPH1,0;ENSG00000160190_SLC37A1,0;ENSG00000239930_AP001625.3,0
chr9:113400920-113401826	0.0870833	1.26233e-09	4.91502e-09	ENSG00000148218_ALAD,0	ENSG00000148218_ALAD,0
chr17:45147993-45148855	0.0869831	1.31866e-09	5.11259e-09	ENSG00000276728_AC142472.1,0;ENSG00000186834_HEXIM1,0	ENSG00000276728_AC142472.1,0;ENSG00000186834_HEXIM1,0
chr1:160098529-160099364	0.0869413	1.34283e-09	5.18435e-09	ENSG00000162729_IGSF8,0	ENSG00000162729_IGSF8,0
chr19:506716-507562	0.0869039	1.36492e-09	5.24749e-09	ENSG00000141933_TPGS1,0;ENSG00000266933_AC005775.1,271	ENSG00000141933_TPGS1,0;ENSG00000266933_AC005775.1,271
chr6:11537141-11538015	0.08671	1.48493e-09	5.685e-09	ENSG00000205269_TMEM170B,0	ENSG00000205269_TMEM170B,0
chr16:89490276-89491191	0.0865959	1.56031e-09	5.94869e-09	ENSG00000167522_ANKRD11,0;ENSG00000197912_SPG7,0	ENSG00000167522_ANKRD11,0;ENSG00000197912_SPG7,0
chr10:931410-932299	0.0862283	1.82934e-09	6.94541e-09	ENSG00000229869_AL359878.2,-727;ENSG00000107929_LARP4B,0	ENSG00000107929_LARP4B,0
chr9:71910867-71911737	0.0861089	1.92607e-09	7.28247e-09	ENSG00000107362_ABHD17B,0;ENSG00000155621_C9orf85,0	ENSG00000107362_ABHD17B,0;ENSG00000155621_C9orf85,0
chr22:40950947-40951867	0.0860544	1.97183e-09	7.42479e-09	ENSG00000100387_RBX1,0	ENSG00000100387_RBX1,0
chr9:97633087-97633986	0.0859922	2.02543e-09	7.59535e-09	ENSG00000136925_TSTD2,0;ENSG00000136937_NCBP1,0	ENSG00000136925_TSTD2,0;ENSG00000136937_NCBP1,0
chr7:152463519-152464383	0.0859795	2.03648e-09	7.60564e-09	ENSG00000261455_LINC01003,0	ENSG00000261455_LINC01003,0
chr8:123416144-123417040	0.0858625	2.14166e-09	7.96592e-09	ENSG00000156802_ATAD2,0;ENSG00000156795_WDYHV1,0	ENSG00000156802_ATAD2,0;ENSG00000156795_WDYHV1,0
chr1:88992397-88993337	0.0858457	2.1572e-09	7.99123e-09	ENSG00000137944_KYAT3,0;ENSG00000213516_RBMXL1,0	ENSG00000137944_KYAT3,0;ENSG00000213516_RBMXL1,0
chr19:6372991-6373609	0.08569	2.30638e-09	8.50942e-09	ENSG00000125652_ALKBH7,197	ENSG00000125652_ALKBH7,197
chr5:177426020-177426918	0.0856388	2.35768e-09	8.66378e-09		ENSG00000198055_GRK6,22816
chr12:82686447-82687320	0.0856187	2.37811e-09	8.70387e-09	ENSG00000286043_AC091214.1,0;ENSG00000179104_TMTC2,0	ENSG00000286043_AC091214.1,0;ENSG00000179104_TMTC2,0
chr19:18521863-18522796	0.0855034	2.49853e-09	9.09358e-09	ENSG00000105656_ELL,0	ENSG00000105656_ELL,0
chr4:165327071-165327976	0.0854979	2.50446e-09	9.09358e-09	ENSG00000052802_MSMO1,0	ENSG00000052802_MSMO1,0
chr12:95217177-95218068	0.0854828	2.52071e-09	9.11638e-09	ENSG00000180263_FGD6,0;ENSG00000028203_VEZT,0	ENSG00000180263_FGD6,0;ENSG00000028203_VEZT,0
chr11:123061965-123062860	0.0853988	2.61295e-09	9.41279e-09	ENSG00000288061_AP000926.2,0;ENSG00000109971_HSPA8,370	ENSG00000288061_AP000926.2,0;ENSG00000109971_HSPA8,370
chr4:39527201-39528118	0.0853571	2.66005e-09	9.54488e-09	ENSG00000249348_UGDH-AS1,0;ENSG00000109814_UGDH,193	ENSG00000249348_UGDH-AS1,0;ENSG00000109814_UGDH,193
chr3:9730880-9731783	0.0852086	2.83425e-09	1.01302e-08	ENSG00000156983_BRPF1,0	ENSG00000156983_BRPF1,0
chr2:55050157-55051057	0.0851516	2.904e-09	1.03392e-08		ENSG00000115310_RTN4,61564
chr15:92808858-92809778	0.0851301	2.93077e-09	1.0394e-08	ENSG00000258922_AC106028.2,-291;ENSG00000185442_FAM174B,106;ENSG00000274215_AC106028.4,407	ENSG00000185442_FAM174B,106;ENSG00000274215_AC106028.4,407
chr17:59154973-59155843	0.08505	3.03263e-09	1.06946e-08	ENSG00000182628_SKA2,0;ENSG00000068489_PRR11,0	ENSG00000182628_SKA2,0;ENSG00000068489_PRR11,0
chr12:53500625-53501408	0.0850451	3.03891e-09	1.06946e-08	ENSG00000139625_MAP3K12,-562;ENSG00000139546_TARBP2,0;ENSG00000270175_AC023509.3,0	ENSG00000270175_AC023509.3,0;ENSG00000139546_TARBP2,0
chr17:4967134-4967999	0.0849933	3.10677e-09	1.08916e-08	ENSG00000091640_SPAG7,0;ENSG00000262429_AC004771.4,0	ENSG00000091640_SPAG7,0;ENSG00000262429_AC004771.4,0;ENSG00000108509_CAMTA2,19676
chr5:32312617-32313492	0.084849	3.30352e-09	1.15371e-08	ENSG00000150712_MTMR12,0	ENSG00000150712_MTMR12,0
chr19:12937988-12938884	0.0846323	3.62192e-09	1.2601e-08	ENSG00000179218_CALR,0	ENSG00000179218_CALR,0
chr8:28401712-28402533	0.0845914	3.68522e-09	1.27726e-08	ENSG00000186918_ZNF395,168	ENSG00000186918_ZNF395,168;ENSG00000214050_FBXO16,87745
chr10:104121490-104122414	0.0844663	3.88581e-09	1.3417e-08	ENSG00000156384_SFR1,0	ENSG00000156384_SFR1,0
chr19:58380585-58381474	0.0843976	4.00049e-09	1.37611e-08	ENSG00000152475_ZNF837,0	ENSG00000152475_ZNF837,0
chr19:19063320-19064235	0.0843345	4.10859e-09	1.408e-08	ENSG00000181035_SLC25A42,0	ENSG00000181035_SLC25A42,0
chr14:20461203-20462137	0.0842315	4.29143e-09	1.46517e-08	ENSG00000165782_PIP4P1,0	ENSG00000165782_PIP4P1,0
chr6:89080210-89081097	0.0841867	4.37335e-09	1.48759e-08	ENSG00000271931_AL353135.1,0;ENSG00000146278_PNRC1,0	ENSG00000271931_AL353135.1,0;ENSG00000146278_PNRC1,0
chr7:44606316-44607240	0.0841251	4.48852e-09	1.52111e-08	ENSG00000105953_OGDH,0	ENSG00000105953_OGDH,0
chr17:1715974-1716858	0.0840264	4.67899e-09	1.57981e-08	ENSG00000167716_WDR81,0;ENSG00000186594_MIR22HG,316	ENSG00000167716_WDR81,0;ENSG00000186594_MIR22HG,316
chr2:46698598-46699477	0.083989	4.75346e-09	1.59905e-08	ENSG00000222005_LINC01118,0;ENSG00000171150_SOCS5,0	ENSG00000222005_LINC01118,0;ENSG00000171150_SOCS5,0
chr19:54189766-54190390	0.0839707	4.79002e-09	1.60545e-08	ENSG00000125505_MBOAT7,0;ENSG00000170892_TSEN34,0	ENSG00000125505_MBOAT7,0;ENSG00000170892_TSEN34,0
chr4:98995135-98996033	0.0839115	4.91086e-09	1.63994e-08	ENSG00000164024_METAP1,0	ENSG00000164024_METAP1,0
chr1:235328037-235328893	0.0838917	4.95202e-09	1.64767e-08	ENSG00000054267_ARID4B,0;ENSG00000285053_TBCE,0;ENSG00000152904_GGPS1,687	ENSG00000054267_ARID4B,0;ENSG00000285053_TBCE,0;ENSG00000152904_GGPS1,687
chr11:130002383-130003254	0.083806	5.13372e-09	1.70194e-08	ENSG00000170325_PRDM10,0;ENSG00000233220_LINC00167,0	ENSG00000170325_PRDM10,0;ENSG00000233220_LINC00167,0
chr14:20342928-20343835	0.0836022	5.59201e-09	1.84718e-08	ENSG00000129484_PARP2,0;ENSG00000259001_AL355075.4,0	ENSG00000259001_AL355075.4,0;ENSG00000129484_PARP2,0
chr12:53625774-53626658	0.0835539	5.70635e-09	1.87817e-08	ENSG00000170653_ATF7,0	ENSG00000170653_ATF7,0
chr3:48088572-48089501	0.0835018	5.83216e-09	1.9127e-08	ENSG00000047849_MAP4,0	ENSG00000047849_MAP4,0
chr19:16659688-16660589	0.0834736	5.90155e-09	1.92854e-08	ENSG00000072954_TMEM38A,-550;ENSG00000214046_SMIM7,0	ENSG00000214046_SMIM7,0
chr20:17968347-17969263	0.0834009	6.08365e-09	1.98097e-08	ENSG00000089006_SNX5,0;ENSG00000125871_MGME1,0	ENSG00000089006_SNX5,0;ENSG00000125871_MGME1,0;ENSG00000125850_OVOL2,89925
chr7:77798223-77799134	0.0832348	6.52106e-09	2.11588e-08	ENSG00000135211_TMEM60,0;ENSG00000006576_PHTF2,0	ENSG00000135211_TMEM60,0;ENSG00000006576_PHTF2,0
chr13:50123971-50124879	0.0831415	6.77988e-09	2.19208e-08	ENSG00000274270_AL137060.3,-937;ENSG00000231607_DLEU2,841	ENSG00000231607_DLEU2,841;ENSG00000176124_DLEU1,41802
chr4:83034606-83035520	0.0831186	6.84479e-09	2.20528e-08	ENSG00000138663_COPS4,159	ENSG00000138663_COPS4,159
chr19:49766253-49767168	0.0830759	6.96766e-09	2.23699e-08	ENSG00000196961_AP2A1,0	ENSG00000196961_AP2A1,0
chr3:49411717-49412585	0.0830412	7.069e-09	2.26159e-08	ENSG00000145022_TCTA,0;ENSG00000067560_RHOA,413	ENSG00000145022_TCTA,0;ENSG00000067560_RHOA,413
chr2:20446565-20447454	0.0829927	7.21342e-09	2.29975e-08	ENSG00000143878_RHOB,0	ENSG00000143878_RHOB,0
chr8:28622130-28623047	0.0829019	7.49094e-09	2.37993e-08		ENSG00000012232_EXTL3,21661
chr11:118435851-118436763	0.0828762	7.5716e-09	2.39222e-08	ENSG00000255384_AP001267.2,-645;ENSG00000118058_KMT2A,0	ENSG00000118058_KMT2A,0
chr7:100585945-100586877	0.0828729	7.58191e-09	2.39222e-08	ENSG00000077454_LRCH4,0;ENSG00000106336_FBXO24,1963	ENSG00000077454_LRCH4,0;ENSG00000106336_FBXO24,1963
chr10:3172461-3173393	0.0827842	7.86649e-09	2.47348e-08	ENSG00000107959_PITRM1,0	ENSG00000107959_PITRM1,0
chr2:134918164-134919087	0.0826977	8.15384e-09	2.55505e-08	ENSG00000082258_CCNT2,0;ENSG00000224043_CCNT2-AS1,0	ENSG00000224043_CCNT2-AS1,0;ENSG00000082258_CCNT2,0
chr9:94165794-94166532	0.0826322	8.37857e-09	2.61652e-08	ENSG00000269929_AL158152.1,0	ENSG00000269929_AL158152.1,0
chr4:48340952-48341825	0.0826006	8.48895e-09	2.64197e-08	ENSG00000109171_SLAIN2,0	ENSG00000109171_SLAIN2,0
chr21:42892792-42893669	0.0825603	8.63191e-09	2.67735e-08		ENSG00000160194_NDUFV3,13148
chr1:2227412-2228294	0.0825277	8.74898e-09	2.7045e-08	ENSG00000157933_SKI,-25
chr2:42809796-42810665	0.0824949	8.86876e-09	2.72487e-08
chr19:8832207-8833088	0.0824933	8.87445e-09	2.72487e-08	ENSG00000167785_ZNF558,0;ENSG00000170948_MBD3L1,0;ENSG00000269400_AC008734.2,0	ENSG00000167785_ZNF558,0;ENSG00000170948_MBD3L1,0;ENSG00000269400_AC008734.2,0
chr3:98901367-98902220	0.0823946	9.2444e-09	2.82897e-08	ENSG00000239462_AC091212.1,-204;ENSG00000057019_DCBLD2,0	ENSG00000057019_DCBLD2,0
chr22:38755603-38756414	0.0823834	9.28735e-09	2.83264e-08		ENSG00000100242_SUN2,37729
chr10:96832154-96832941	0.0823706	9.33626e-09	2.8381e-08	ENSG00000196233_LCOR,0	ENSG00000196233_LCOR,0
chr17:38799279-38800214	0.0823412	9.45047e-09	2.86331e-08	ENSG00000276293_PIP4K2B,0	ENSG00000276293_PIP4K2B,0
chr5:55994620-55995555	0.0822922	9.64388e-09	2.91226e-08	ENSG00000134352_IL6ST,0;ENSG00000227908_AC016596.1,0	ENSG00000134352_IL6ST,0;ENSG00000227908_AC016596.1,0;ENSG00000249236_AC008892.1,16372
chr1:58783710-58784617	0.0822606	9.77048e-09	2.94079e-08	ENSG00000234807_LINC01135,-511;ENSG00000177606_JUN,0	ENSG00000177606_JUN,0
chr19:18152619-18153439	0.0822327	9.88359e-09	2.96508e-08	ENSG00000269145_AC007192.2,-928;ENSG00000105647_PIK3R2,0	ENSG00000105647_PIK3R2,0
chr16:50741505-50742406	0.0821217	1.03463e-08	3.09374e-08	ENSG00000083799_CYLD,0;ENSG00000261644_AC007728.2,409	ENSG00000083799_CYLD,0;ENSG00000261644_AC007728.2,409
chr14:32076477-32077373	0.0821119	1.0388e-08	3.0961e-08	ENSG00000258655_ARHGAP5-AS1,0;ENSG00000100852_ARHGAP5,363	ENSG00000258655_ARHGAP5-AS1,0;ENSG00000100852_ARHGAP5,363
chr5:179732335-179733183	0.082095	1.04607e-08	3.10763e-08	ENSG00000161021_MAML1,0	ENSG00000161021_MAML1,0
chr19:49676470-49677402	0.0820351	1.07218e-08	3.17491e-08	ENSG00000126457_PRMT1,684	ENSG00000126457_PRMT1,684
chr2:99489768-99490624	0.0820046	1.08573e-08	3.20263e-08	ENSG00000135945_REV1,0	ENSG00000135945_REV1,0
chr16:2905229-2906172	0.0819961	1.08953e-08	3.20263e-08
chr1:226062150-226062994	0.0819899	1.09232e-08	3.20263e-08	ENSG00000272562_AL512343.2,-252;ENSG00000163041_H3F3A,299	ENSG00000163041_H3F3A,299
chr2:9630635-9631478	0.0819827	1.09554e-08	3.20263e-08	ENSG00000134308_YWHAQ,0	ENSG00000134308_YWHAQ,0
chr16:636645-637384	0.0819163	1.1259e-08	3.2809e-08	ENSG00000130731_METTL26,-279;ENSG00000172366_MCRIP2,0	ENSG00000172366_MCRIP2,0
chr17:47649225-47650097	0.0817838	1.18887e-08	3.45338e-08	ENSG00000263766_AC025682.1,0;ENSG00000108424_KPNB1,0	ENSG00000263766_AC025682.1,0;ENSG00000108424_KPNB1,0
chr11:68121053-68121971	0.0817349	1.21295e-08	3.51218e-08	ENSG00000110721_CHKA,0;ENSG00000255236_AP002992.1,0	ENSG00000110721_CHKA,0;ENSG00000255236_AP002992.1,0
chr2:10448001-10448850	0.0816657	1.24787e-08	3.60189e-08	ENSG00000115758_ODC1,0;ENSG00000257135_ODC1-DT,0	ENSG00000115758_ODC1,0;ENSG00000257135_ODC1-DT,0
chr9:92764645-92765495	0.0816447	1.25864e-08	3.62156e-08	ENSG00000185963_BICD2,0	ENSG00000185963_BICD2,0
chr22:50582507-50583381	0.0816249	1.26889e-08	3.63959e-08	ENSG00000205559_CHKB-DT,0	ENSG00000205559_CHKB-DT,0;ENSG00000100288_CHKB,18074
chr22:36775845-36776751	0.0815456	1.31076e-08	3.74794e-08	ENSG00000100360_IFT27,0	ENSG00000100360_IFT27,0
chr2:74457845-74458676	0.0813442	1.42326e-08	4.05697e-08	ENSG00000239779_WBP1,0	ENSG00000239779_WBP1,0;ENSG00000115274_INO80B,2758
chr6:4135386-4136262	0.0813328	1.42987e-08	4.06315e-08	ENSG00000254821_AL136309.4,0;ENSG00000198721_ECI2,0;ENSG00000234817_AL136309.2,0	ENSG00000198721_ECI2,0;ENSG00000254821_AL136309.4,0;ENSG00000234817_AL136309.2,0
chr9:40991704-40992646	0.0813125	1.44176e-08	4.08423e-08
chr20:35741962-35742860	0.0812884	1.45603e-08	4.11194e-08	ENSG00000131051_RBM39,0	ENSG00000131051_RBM39,0
chr17:47895715-47896638	0.0812487	1.47981e-08	4.16623e-08	ENSG00000264920_AC018521.5,0;ENSG00000167182_SP2,0	ENSG00000264920_AC018521.5,0;ENSG00000167182_SP2,0
chr15:89087854-89088772	0.0812212	1.49649e-08	4.20028e-08	ENSG00000261407_AC013565.3,0;ENSG00000140526_ABHD2,395	ENSG00000261407_AC013565.3,0;ENSG00000140526_ABHD2,395
chr17:7484258-7484942	0.081137	1.54874e-08	4.33364e-08	ENSG00000174282_ZBTB4,0;ENSG00000181222_POLR2A,0	ENSG00000174282_ZBTB4,0;ENSG00000181222_POLR2A,0
chr17:48047773-48048666	0.0810951	1.57534e-08	4.39463e-08	ENSG00000263412_AC004477.1,0;ENSG00000082641_NFE2L1,0	ENSG00000263412_AC004477.1,0;ENSG00000082641_NFE2L1,0
chr11:64304945-64305840	0.081063	1.59611e-08	4.43903e-08	ENSG00000173153_ESRRA,0	ENSG00000173153_ESRRA,0
chr11:83285725-83286650	0.0809769	1.65294e-08	4.58314e-08	ENSG00000255234_AP000446.1,0;ENSG00000137500_CCDC90B,0	ENSG00000137500_CCDC90B,0;ENSG00000255234_AP000446.1,0
chr3:136752075-136752949	0.08078	1.79051e-08	4.9496e-08	ENSG00000118007_STAG1,0;ENSG00000261758_AC117382.2,0	ENSG00000118007_STAG1,0;ENSG00000261758_AC117382.2,0
chr3:143971339-143972218	0.0807365	1.82238e-08	5.02252e-08	ENSG00000181744_DIPK2A,0	ENSG00000181744_DIPK2A,0
chr9:125241038-125241955	0.0806701	1.87211e-08	5.14408e-08	ENSG00000044574_HSPA5,0;ENSG00000239705_AL354710.2,0	ENSG00000044574_HSPA5,0;ENSG00000239705_AL354710.2,0
chr15:89334426-89335328	0.0804735	2.0271e-08	5.55328e-08	ENSG00000140521_POLG,0;ENSG00000261441_AC124068.2,0	ENSG00000140521_POLG,0;ENSG00000261441_AC124068.2,0
chr16:53130248-53131164	0.0804655	2.03362e-08	5.5545e-08		ENSG00000177200_CHD9,75215
chr5:6712789-6713681	0.0804473	2.04867e-08	5.57898e-08	ENSG00000112941_TENT4A,0	ENSG00000112941_TENT4A,0
chr1:179882020-179882939	0.0802643	2.20563e-08	5.98857e-08	ENSG00000143337_TOR1AIP1,0;ENSG00000272906_AL353708.3,0	ENSG00000272906_AL353708.3,0;ENSG00000143337_TOR1AIP1,0
chr4:13484022-13484941	0.0799538	2.49913e-08	6.76257e-08	ENSG00000157869_RAB28,0	ENSG00000157869_RAB28,0
chr13:51452774-51453651	0.0799434	2.50967e-08	6.76257e-08	ENSG00000236778_INTS6-AS1,410;ENSG00000102786_INTS6,613	ENSG00000236778_INTS6-AS1,410;ENSG00000102786_INTS6,613
chr8:144465313-144466160	0.0799402	2.51287e-08	6.76257e-08	ENSG00000187954_CYHR1,0;ENSG00000167702_KIFC2,0;ENSG00000254578_AC084125.1,1496	ENSG00000187954_CYHR1,0;ENSG00000167702_KIFC2,0
chr21:33479601-33480504	0.0798994	2.55438e-08	6.83864e-08	ENSG00000142188_TMEM50B,0	ENSG00000142188_TMEM50B,0
chr5:176388458-176389390	0.0798977	2.55608e-08	6.83864e-08	ENSG00000146066_HIGD2A,0;ENSG00000048162_NOP16,0	ENSG00000048162_NOP16,0;ENSG00000146066_HIGD2A,0;ENSG00000175414_ARL10,22971
chr2:231464144-231465059	0.0798851	2.56903e-08	6.85325e-08		ENSG00000115053_NCL,18582
chr19:18203736-18204641	0.0797685	2.69199e-08	7.16039e-08	ENSG00000268650_AC005759.1,-89;ENSG00000105649_RAB3A,0	ENSG00000105649_RAB3A,0
chr20:23350200-23351048	0.0797284	2.73564e-08	7.25539e-08	ENSG00000132661_NXT1,0;ENSG00000234832_AL096677.1,438	ENSG00000132661_NXT1,0;ENSG00000234832_AL096677.1,438
chr2:195656713-195657583	0.0796962	2.7711e-08	7.32819e-08		ENSG00000196950_SLC39A10,80736
chr5:138464754-138465684	0.0796332	2.84186e-08	7.49366e-08	ENSG00000120738_EGR1,0	ENSG00000120738_EGR1,0
chr10:102501954-102502570	0.0795747	2.90913e-08	7.64901e-08	ENSG00000107882_SUFU,-1417;ENSG00000138107_ACTR1A,142	ENSG00000138107_ACTR1A,142
chr4:17576799-17577735	0.0795534	2.93396e-08	7.69219e-08	ENSG00000002549_LAP3,0	ENSG00000002549_LAP3,0
chr10:73096500-73097366	0.0794612	3.04402e-08	7.95794e-08	ENSG00000122884_P4HA1,0	ENSG00000122884_P4HA1,0
chr1:228139703-228140588	0.0794246	3.08893e-08	8.05235e-08	ENSG00000143774_GUK1,0	ENSG00000143774_GUK1,0
chr11:66958088-66959006	0.0793816	3.14231e-08	8.16822e-08	ENSG00000173599_PC,0	ENSG00000173599_PC,0
chr5:151771274-151772180	0.079288	3.26173e-08	8.45461e-08	ENSG00000275765_AC091982.3,0;ENSG00000145907_G3BP1,229;ENSG00000177556_ATOX1,352	ENSG00000275765_AC091982.3,0;ENSG00000145907_G3BP1,229;ENSG00000177556_ATOX1,352
chr11:695070-695788	0.0791891	3.39275e-08	8.7694e-08	ENSG00000177042_TMEM80,0;ENSG00000177106_EPS8L2,632	ENSG00000177042_TMEM80,0;ENSG00000177106_EPS8L2,632;ENSG00000177030_DEAF1,10927
chr5:55534540-55535408	0.0791187	3.4891e-08	8.99304e-08	ENSG00000067113_PLPP1,0	ENSG00000067113_PLPP1,0
chr7:44847700-44848601	0.0790078	3.64637e-08	9.372e-08	ENSG00000105968_H2AFV,0;ENSG00000234183_LINC01952,0	ENSG00000105968_H2AFV,0;ENSG00000234183_LINC01952,0
chr22:41832485-41833399	0.0790005	3.65694e-08	9.37283e-08	ENSG00000198911_SREBF2,0;ENSG00000184068_SREBF2-AS1,1266	ENSG00000198911_SREBF2,0;ENSG00000184068_SREBF2-AS1,1266
chr1:183635464-183636372	0.0789872	3.67624e-08	9.38595e-08	ENSG00000162704_ARPC5,0;ENSG00000143344_RGL1,0	ENSG00000162704_ARPC5,0;ENSG00000143344_RGL1,0
chr5:154754731-154755650	0.0789829	3.68257e-08	9.38595e-08		ENSG00000155506_LARP1,41888
chr5:128083144-128083958	0.0788127	3.93961e-08	1.00132e-07	ENSG00000245937_LINC01184,0;ENSG00000064651_SLC12A2,0	ENSG00000245937_LINC01184,0;ENSG00000064651_SLC12A2,0
chr21:42974025-42974866	0.0786982	4.12231e-08	1.04485e-07	ENSG00000160199_PKNOX1,0	ENSG00000160199_PKNOX1,0
chr19:10717394-10718287	0.0786829	4.14725e-08	1.04827e-07	ENSG00000079805_DNM2,0	ENSG00000079805_DNM2,0
chr1:44799731-44800626	0.0786146	4.26075e-08	1.07399e-07	ENSG00000173846_PLK3,0	ENSG00000173846_PLK3,0
chr15:31326173-31327076	0.0785182	4.42624e-08	1.11264e-07	ENSG00000169926_KLF13,0	ENSG00000169926_KLF13,0
chr19:11434870-11435802	0.0784458	4.55449e-08	1.14058e-07	ENSG00000130175_PRKCSH,0;ENSG00000198003_CCDC151,0	ENSG00000198003_CCDC151,0;ENSG00000130175_PRKCSH,0
chr5:43313104-43314022	0.0784414	4.56231e-08	1.14058e-07	ENSG00000112972_HMGCS1,0	ENSG00000112972_HMGCS1,0
chr18:9474903-9475827	0.0784007	4.63605e-08	1.15585e-07	ENSG00000273335_AP005432.2,-897;ENSG00000017797_RALBP1,0	ENSG00000017797_RALBP1,0
chrX:1391874-1392764	0.0783934	4.64951e-08	1.15606e-07	ENSG00000169100_SLC25A6,0	ENSG00000169100_SLC25A6,0
chr10:23438553-23439442	0.0783073	4.80983e-08	1.19268e-07	ENSG00000165312_OTUD1,-16
chr16:10743645-10744541	0.0782272	4.96382e-08	1.22754e-07	ENSG00000103274_NUBP1,0	ENSG00000103274_NUBP1,0
chr1:110338694-110339511	0.0781688	5.0792e-08	1.25269e-07	ENSG00000227963_RBM15-AS1,0;ENSG00000162775_RBM15,188	ENSG00000227963_RBM15-AS1,0;ENSG00000162775_RBM15,188
chr3:105868639-105869556	0.0780893	5.24033e-08	1.28895e-07	ENSG00000114423_CBLB,0	ENSG00000114423_CBLB,0
chr3:36992853-36993797	0.0780771	5.26551e-08	1.29167e-07	ENSG00000178567_EPM2AIP1,0;ENSG00000076242_MLH1,0	ENSG00000178567_EPM2AIP1,0;ENSG00000076242_MLH1,0
chr11:73597874-73598766	0.0780286	5.36666e-08	1.31297e-07	ENSG00000054965_FAM168A,0	ENSG00000054965_FAM168A,0
chr11:83156474-83157406	0.0779556	5.52258e-08	1.3452e-07	ENSG00000165494_PCF11,0	ENSG00000165494_PCF11,0
chr5:108748426-108749320	0.0779532	5.52782e-08	1.3452e-07	ENSG00000151422_FER,585	ENSG00000151422_FER,585
chr2:97663656-97664536	0.0778946	5.65617e-08	1.37278e-07	ENSG00000115073_ACTR1B,0;ENSG00000228486_C2orf92,0	ENSG00000115073_ACTR1B,0;ENSG00000228486_C2orf92,0
chr17:45060785-45061694	0.077882	5.6841e-08	1.37591e-07	ENSG00000172992_DCAKD,0	ENSG00000172992_DCAKD,0;ENSG00000136448_NMT1,9175
chr19:42283563-42284407	0.0778728	5.70471e-08	1.37726e-07		ENSG00000079432_CIC,15026
chr22:46035488-46036393	0.07786	5.73328e-08	1.38051e-07
chr10:72273424-72274229	0.0774207	6.8062e-08	1.63456e-07	ENSG00000168209_DDIT4,0;ENSG00000269926_DDIT4-AS1,1751	ENSG00000168209_DDIT4,0
chr11:57667409-57668244	0.0773656	6.95377e-08	1.66563e-07	ENSG00000156599_ZDHHC5,0	ENSG00000156599_ZDHHC5,0
chr7:107168267-107169145	0.0773213	7.07455e-08	1.68589e-07	ENSG00000105856_HBP1,0	ENSG00000105856_HBP1,0
chr8:17922426-17923276	0.0773186	7.08212e-08	1.68589e-07	ENSG00000078674_PCM1,0	ENSG00000078674_PCM1,0
chr6:63571992-63572891	0.0773144	7.09362e-08	1.68589e-07	ENSG00000266680_AL135905.1,0;ENSG00000285976_AL135905.2,0	ENSG00000266680_AL135905.1,0;ENSG00000285976_AL135905.2,0;ENSG00000112245_PTP4A1,50246
chr20:45934546-45935463	0.0772287	7.33387e-08	1.73847e-07	ENSG00000100982_PCIF1,0;ENSG00000285796_AL162458.1,0	ENSG00000285796_AL162458.1,0;ENSG00000100982_PCIF1,0
chr12:123232646-123233574	0.0772135	7.37739e-08	1.74427e-07	ENSG00000130921_C12orf65,0	ENSG00000130921_C12orf65,0;ENSG00000051825_MPHOSPH9,10440
chr3:88058600-88059457	0.0771992	7.41835e-08	1.74943e-07	ENSG00000175105_ZNF654,0	ENSG00000175105_ZNF654,0;ENSG00000163320_CGGBP1,90428
chr12:67268824-67269627	0.0770888	7.74319e-08	1.82134e-07	ENSG00000111530_CAND1,0	ENSG00000111530_CAND1,0
chr14:77320754-77321511	0.0770586	7.83435e-08	1.83806e-07	ENSG00000009830_POMT2,0;ENSG00000100577_GSTZ1,0	ENSG00000009830_POMT2,0;ENSG00000100577_GSTZ1,0
chr10:15168378-15169262	0.076913	8.28914e-08	1.93979e-07	ENSG00000152465_NMT2,0	ENSG00000152465_NMT2,0
chr11:64269617-64270502	0.0768534	8.48225e-08	1.97991e-07	ENSG00000173264_GPR137,0	ENSG00000173264_GPR137,0;ENSG00000002330_BAD,14202
chr5:177133173-177134066	0.0767635	8.7823e-08	2.04473e-07	ENSG00000165671_NSD1,148	ENSG00000165671_NSD1,148
chr1:156338015-156338874	0.0767371	8.87234e-08	2.06045e-07	ENSG00000163467_TSACC,701	ENSG00000163467_TSACC,701;ENSG00000163468_CCT3,28999
chr3:49021362-49022183	0.0765617	9.49332e-08	2.19909e-07	ENSG00000178149_DALRD3,110;ENSG00000178057_NDUFAF3,903	ENSG00000178149_DALRD3,110;ENSG00000178057_NDUFAF3,903
chr14:23094802-23095682	0.0765113	9.67954e-08	2.23656e-07	ENSG00000179933_C14orf119,0;ENSG00000100813_ACIN1,0	ENSG00000100813_ACIN1,0;ENSG00000179933_C14orf119,0
chr16:56190834-56191760	0.0765032	9.70971e-08	2.23788e-07	ENSG00000246379_AC040168.1,0;ENSG00000087258_GNAO1,0	ENSG00000246379_AC040168.1,0;ENSG00000087258_GNAO1,0
chr3:120094481-120095269	0.0764778	9.80504e-08	2.25417e-07	ENSG00000082701_GSK3B,-64;ENSG00000242622_AC092910.3,0	ENSG00000242622_AC092910.3,0
chr18:12376962-12377872	0.0764667	9.84689e-08	2.25812e-07	ENSG00000141385_AFG3L2,0	ENSG00000141385_AFG3L2,0
chr22:40856344-40857269	0.0764399	9.94904e-08	2.2739e-07	ENSG00000100380_ST13,0;ENSG00000196236_XPNPEP3,0	ENSG00000100380_ST13,0;ENSG00000196236_XPNPEP3,0
chr7:33062427-33063363	0.076431	9.98341e-08	2.2739e-07	ENSG00000122643_NT5C3A,0	ENSG00000122643_NT5C3A,0
chr1:10210017-10210916	0.0764292	9.99026e-08	2.2739e-07	ENSG00000054523_KIF1B,0	ENSG00000054523_KIF1B,0
chr7:99504392-99505298	0.0763169	1.04308e-07	2.36829e-07	ENSG00000196652_ZKSCAN5,0;ENSG00000160908_ZNF394,0	ENSG00000160908_ZNF394,0;ENSG00000196652_ZKSCAN5,0
chr1:173867754-173868632	0.0760322	1.16342e-07	2.63497e-07	ENSG00000185278_ZBTB37,0;ENSG00000234741_GAS5,250	ENSG00000185278_ZBTB37,0;ENSG00000234741_GAS5,250
chr3:9396687-9397204	0.0758602	1.2425e-07	2.80712e-07	ENSG00000168137_SETD5,-411;ENSG00000206573_THUMPD3-AS1,1375	ENSG00000206573_THUMPD3-AS1,1375
chr4:781572-782488	0.0758504	1.24715e-07	2.8107e-07	ENSG00000249592_AC139887.2,0	ENSG00000249592_AC139887.2,0
chr14:23320854-23321752	0.0757667	1.28764e-07	2.89482e-07	ENSG00000100836_PABPN1,0	ENSG00000100836_PABPN1,0;ENSG00000258643_BCL2L2-PABPN1,14019
chr17:39952613-39953538	0.0757058	1.31792e-07	2.95562e-07	ENSG00000167914_GSDMA,0	ENSG00000167914_GSDMA,0
chr8:144826889-144827733	0.0755438	1.40176e-07	3.13596e-07	ENSG00000147789_ZNF7,0	ENSG00000147789_ZNF7,0
chr16:31459237-31460061	0.0755183	1.41542e-07	3.15881e-07	ENSG00000260267_AC026471.1,0;ENSG00000140691_ARMC5,1157	ENSG00000260267_AC026471.1,0;ENSG00000140691_ARMC5,1157
chr2:135530887-135531682	0.0755037	1.42331e-07	3.16867e-07	ENSG00000121988_ZRANB3,0;ENSG00000048991_R3HDM1,0	ENSG00000121988_ZRANB3,0;ENSG00000048991_R3HDM1,0
chr12:6851941-6852782	0.0753234	1.52424e-07	3.38515e-07	ENSG00000111665_CDCA3,0;ENSG00000111667_USP5,0	ENSG00000111665_CDCA3,0;ENSG00000111667_USP5,0
chr8:60651782-60652596	0.0752971	1.53951e-07	3.41077e-07	ENSG00000228862_AC068389.1,965	ENSG00000228862_AC068389.1,965
chr18:9913438-9914325	0.0752691	1.55594e-07	3.43885e-07	ENSG00000272799_AC006238.1,-589;ENSG00000101558_VAPA,0	ENSG00000101558_VAPA,0
chr14:65102173-65103088	0.0752493	1.56765e-07	3.45639e-07	ENSG00000125952_MAX,0	ENSG00000125952_MAX,0
chr21:37366073-37367003	0.0752306	1.5788e-07	3.47259e-07	ENSG00000273210_AP001437.1,-141;ENSG00000287637_AP001437.2,0;ENSG00000157540_DYRK1A,500	ENSG00000287637_AP001437.2,0;ENSG00000157540_DYRK1A,500
chr7:76358771-76359664	0.0752103	1.591e-07	3.49103e-07	ENSG00000170027_YWHAG,0	ENSG00000170027_YWHAG,0
chr16:87950795-87951599	0.0750099	1.71632e-07	3.75702e-07	ENSG00000172530_BANP,1551	ENSG00000172530_BANP,1551
chr16:9091057-9091960	0.0750006	1.72237e-07	3.76126e-07	ENSG00000182831_C16orf72,0	ENSG00000182831_C16orf72,0
chr11:130069307-130070192	0.0749885	1.73028e-07	3.76954e-07	ENSG00000084234_APLP2,1160	ENSG00000084234_APLP2,1160
chr13:95676624-95677510	0.0749543	1.75275e-07	3.80943e-07	ENSG00000247400_DNAJC3-DT,0;ENSG00000102580_DNAJC3,0	ENSG00000247400_DNAJC3-DT,0;ENSG00000102580_DNAJC3,0
chr19:796842-797700	0.0747501	1.89305e-07	4.1046e-07	ENSG00000011304_PTBP1,0	ENSG00000011304_PTBP1,0
chr19:2096231-2097111	0.0746873	1.93834e-07	4.19287e-07	ENSG00000099840_IZUMO4,0;ENSG00000172081_MOB3A,0	ENSG00000172081_MOB3A,0;ENSG00000099840_IZUMO4,0
chr18:32470463-32471318	0.0746719	1.94963e-07	4.20735e-07	ENSG00000141441_GAREM1,0;ENSG00000285095_AC025887.2,175	ENSG00000141441_GAREM1,0;ENSG00000285095_AC025887.2,175
chr19:5680322-5681257	0.074613	1.99329e-07	4.29144e-07	ENSG00000167733_HSD11B1L,0;ENSG00000174917_MICOS13,0	ENSG00000174917_MICOS13,0;ENSG00000167733_HSD11B1L,0;ENSG00000130255_RPL36,5375
chr11:77820507-77821411	0.074502	2.07823e-07	4.46381e-07	ENSG00000048649_RSF1,0;ENSG00000087884_AAMDC,0	ENSG00000048649_RSF1,0;ENSG00000087884_AAMDC,0
chr17:51120441-51121315	0.0744351	2.13105e-07	4.56653e-07	ENSG00000008294_SPAG9,0	ENSG00000008294_SPAG9,0
chr1:243255519-243256309	0.0743313	2.21562e-07	4.73666e-07	ENSG00000143702_CEP170,-171;ENSG00000054282_SDCCAG8,0	ENSG00000054282_SDCCAG8,0
chr4:3073905-3074807	0.074295	2.24591e-07	4.79022e-07	ENSG00000251075_HTT-AS,0	ENSG00000251075_HTT-AS,0;ENSG00000197386_HTT,32483
chr2:152717192-152717983	0.0742595	2.27598e-07	4.83316e-07	ENSG00000177917_ARL6IP6,0;ENSG00000196504_PRPF40A,14	ENSG00000177917_ARL6IP6,0;ENSG00000196504_PRPF40A,14
chr3:184561159-184562071	0.0742588	2.2766e-07	4.83316e-07	ENSG00000182580_EPHB3,0	ENSG00000182580_EPHB3,0
chr6:32971601-32972508	0.074225	2.30554e-07	4.88327e-07	ENSG00000263756_AL645941.3,345;ENSG00000223837_AL645941.1,1369	ENSG00000263756_AL645941.3,345;ENSG00000204256_BRD2,3007
chr16:87383511-87384343	0.0742051	2.32282e-07	4.9085e-07	ENSG00000140941_MAP1LC3B,0	ENSG00000140941_MAP1LC3B,0;ENSG00000103264_FBXO31,7799
chr19:49641611-49642502	0.0741519	2.36947e-07	4.99554e-07	ENSG00000126458_RRAS,-1468;ENSG00000126461_SCAF1,0	ENSG00000126461_SCAF1,0
chr14:24114400-24115296	0.07413	2.38891e-07	5.02232e-07	ENSG00000129535_NRL,0;ENSG00000100897_DCAF11,205	ENSG00000129535_NRL,0;ENSG00000100897_DCAF11,205
chr17:63842512-63843400	0.0741253	2.39315e-07	5.02232e-07	ENSG00000108604_SMARCD2,0	ENSG00000108604_SMARCD2,0
chr19:16111192-16112119	0.0740983	2.4174e-07	5.0616e-07	ENSG00000167461_RAB8A,0	ENSG00000167461_RAB8A,0
chr1:44673965-44674882	0.0740822	2.43196e-07	5.08046e-07	ENSG00000126106_TMEM53,0;ENSG00000198520_ARMH1,0	ENSG00000126106_TMEM53,0;ENSG00000198520_ARMH1,0
chr2:54455786-54456642	0.074071	2.44215e-07	5.09012e-07	ENSG00000115306_SPTBN1,0	ENSG00000115306_SPTBN1,0
chr1:36385563-36386468	0.0740586	2.45353e-07	5.10222e-07	ENSG00000196182_STK40,0	ENSG00000196182_STK40,0
chr14:103333679-103334549	0.0740097	2.49869e-07	5.18436e-07	ENSG00000259775_AL138976.2,-1312;ENSG00000100664_EIF5,135	ENSG00000100664_EIF5,135
chr1:150629007-150629913	0.0739653	2.54044e-07	5.25906e-07	ENSG00000143420_ENSA,0	ENSG00000143420_ENSA,0
chr5:5421999-5422915	0.0739467	2.55815e-07	5.28359e-07	ENSG00000286753_AC091978.1,0;ENSG00000164151_ICE1,1335	ENSG00000286753_AC091978.1,0;ENSG00000164151_ICE1,1335
chr7:105013508-105014432	0.0739336	2.57063e-07	5.28359e-07	ENSG00000228393_LINC01004,-464;ENSG00000005483_KMT2E,0;ENSG00000239569_KMT2E-AS1,0	ENSG00000239569_KMT2E-AS1,0;ENSG00000005483_KMT2E,0
chr2:44168200-44168958	0.073929	2.57508e-07	5.28359e-07	ENSG00000273106_AC019129.2,0;ENSG00000138032_PPM1B,231	ENSG00000273106_AC019129.2,0;ENSG00000138032_PPM1B,231
chr6:85643061-85643959	0.0739286	2.57539e-07	5.28359e-07	ENSG00000135316_SYNCRIP,0	ENSG00000135316_SYNCRIP,0
chr6:31619917-31620946	0.0738908	2.61197e-07	5.34666e-07	ENSG00000204469_PRRC2A,0	ENSG00000204469_PRRC2A,0
chr12:92928941-92929790	0.0738032	2.69852e-07	5.51148e-07	ENSG00000102189_EEA1,0	ENSG00000102189_EEA1,0
chr17:28335144-28336075	0.0737773	2.72468e-07	5.55253e-07	ENSG00000109083_IFT20,0;ENSG00000109079_TNFAIP1,0	ENSG00000109083_IFT20,0;ENSG00000109079_TNFAIP1,0
chr2:26345567-26346460	0.0737556	2.74677e-07	5.58509e-07	ENSG00000173567_ADGRF3,357	ENSG00000173567_ADGRF3,357;ENSG00000138018_SELENOI,37020
chr19:41263625-41264490	0.07371	2.79373e-07	5.66798e-07	ENSG00000105323_HNRNPUL1,1129	ENSG00000105323_HNRNPUL1,1129
chr8:38996265-38997168	0.073668	2.83767e-07	5.74441e-07	ENSG00000169490_TM2D2,0;ENSG00000168615_ADAM9,0	ENSG00000169490_TM2D2,0;ENSG00000168615_ADAM9,0
chr19:18281309-18282200	0.0736612	2.84487e-07	5.74625e-07	ENSG00000130522_JUND,0	ENSG00000130522_JUND,0
chr4:51842614-51843499	0.073572	2.94065e-07	5.92663e-07	ENSG00000109184_DCUN1D4,0	ENSG00000109184_DCUN1D4,0
chr2:207711135-207712029	0.0734582	3.06742e-07	6.15588e-07	ENSG00000163249_CCNYL1,0	ENSG00000163249_CCNYL1,0
chr10:5889578-5890499	0.0734578	3.06785e-07	6.15588e-07	ENSG00000134461_ANKRD16,0;ENSG00000134452_FBH1,0	ENSG00000134461_ANKRD16,0;ENSG00000134452_FBH1,0
chr19:38899321-38900247	0.0733855	3.15107e-07	6.30903e-07	ENSG00000104825_NFKBIB,0;ENSG00000068903_SIRT2,0	ENSG00000068903_SIRT2,0;ENSG00000104825_NFKBIB,0
chr17:21042866-21043792	0.073367	3.1727e-07	6.33847e-07	ENSG00000124422_USP22,0	ENSG00000124422_USP22,0
chr19:33176688-33177620	0.0733496	3.19324e-07	6.36561e-07	ENSG00000267054_AC008738.1,-436;ENSG00000130881_LRP3,0	ENSG00000130881_LRP3,0
chr19:56140501-56141388	0.0732781	3.27874e-07	6.52184e-07		ENSG00000167685_ZNF444,7902
chr19:40798538-40799452	0.0731206	3.47517e-07	6.89757e-07	ENSG00000282951_AC008537.4,-1595;ENSG00000269858_EGLN2,0	ENSG00000269858_EGLN2,0
chr16:2155116-2156029	0.0731042	3.49625e-07	6.92439e-07	ENSG00000260260_SNHG19,0;ENSG00000131653_TRAF7,0	ENSG00000260260_SNHG19,0;ENSG00000131653_TRAF7,0
chr10:73811411-73812267	0.0730157	3.6121e-07	7.13838e-07	ENSG00000224195_AC022400.1,-1251;ENSG00000166507_NDST2,0	ENSG00000166507_NDST2,0
chr4:9152476-9153399	0.0729159	3.74728e-07	7.38957e-07		ENSG00000288075_AC108519.1,227870
chr20:2102021-2102752	0.0727601	3.96822e-07	7.80843e-07	ENSG00000125834_STK35,194	ENSG00000125834_STK35,194
chr5:109409675-109410580	0.07274	3.9976e-07	7.84937e-07	ENSG00000198961_PJA2,0	ENSG00000198961_PJA2,0
chr16:2340338-2341177	0.0726206	4.17655e-07	8.18317e-07	ENSG00000167972_ABCA3,0	ENSG00000167972_ABCA3,0
chr1:244451612-244452505	0.0724984	4.36763e-07	8.53927e-07	ENSG00000179397_CATSPERE,-1872;ENSG00000035687_ADSS,0	ENSG00000035687_ADSS,0
chr19:2050846-2051758	0.0724487	4.4477e-07	8.67728e-07	ENSG00000099875_MKNK2,0	ENSG00000099875_MKNK2,0
chr7:135211145-135212045	0.0724176	4.49857e-07	8.75785e-07	ENSG00000105875_WDR91,0	ENSG00000105875_WDR91,0
chr2:231604352-231605201	0.0723636	4.58836e-07	8.91369e-07
chr2:69914341-69915272	0.0723311	4.64305e-07	9.00082e-07		ENSG00000059728_MXD1,16653
chr8:144103879-144104729	0.0722948	4.70497e-07	9.10158e-07	ENSG00000179632_MAF1,0	ENSG00000179632_MAF1,0;ENSG00000179526_SHARPIN,3395
chr19:18192566-18193496	0.0722573	4.76989e-07	9.2077e-07	ENSG00000254858_MPV17L2,0	ENSG00000254858_MPV17L2,0
chr19:56121024-56121883	0.0722502	4.78215e-07	9.21193e-07	ENSG00000142409_ZNF787,0	ENSG00000142409_ZNF787,0
chr20:5126333-5127251	0.0722193	4.83628e-07	9.28402e-07	ENSG00000132646_PCNA,0;ENSG00000101290_CDS2,0	ENSG00000132646_PCNA,0;ENSG00000101290_CDS2,0
chr20:33993059-33993925	0.0722173	4.83986e-07	9.28402e-07	ENSG00000125970_RALY,0;ENSG00000285230_RALY-AS1,432	ENSG00000125970_RALY,0;ENSG00000285230_RALY-AS1,432
chr2:26033502-26034418	0.0721549	4.95128e-07	9.47786e-07	ENSG00000084733_RAB10,0	ENSG00000084733_RAB10,0
chr3:123584675-123585581	0.0720917	5.0664e-07	9.67798e-07	ENSG00000206527_HACD2,0;ENSG00000239523_MYLK-AS1,0	ENSG00000206527_HACD2,0;ENSG00000239523_MYLK-AS1,0
chr8:102863955-102864809	0.0718825	5.46678e-07	1.0421e-06	ENSG00000253320_AZIN1-AS1,0	ENSG00000253320_AZIN1-AS1,0;ENSG00000155096_AZIN1,29055
chr10:1048703-1049587	0.0717171	5.80463e-07	1.10421e-06	ENSG00000067064_IDI1,0;ENSG00000047056_WDR37,0	ENSG00000067064_IDI1,0;ENSG00000047056_WDR37,0
chr17:82458129-82459022	0.0716929	5.85573e-07	1.11162e-06	ENSG00000141562_NARF,0;ENSG00000265458_AC132938.3,0	ENSG00000265458_AC132938.3,0;ENSG00000141562_NARF,0
chr10:69123614-69124537	0.0716194	6.01351e-07	1.1392e-06	ENSG00000122958_VPS26A,102	ENSG00000122958_VPS26A,102
chr12:108731393-108732179	0.0714832	6.31704e-07	1.19423e-06	ENSG00000110880_CORO1C,0	ENSG00000110880_CORO1C,0
chr14:105020763-105021672	0.0712739	6.81214e-07	1.28518e-06	ENSG00000170779_CDCA4,0	ENSG00000170779_CDCA4,0
chr9:35814704-35815623	0.0712221	6.94046e-07	1.30669e-06	ENSG00000137133_HINT2,0;ENSG00000137103_TMEM8B,253	ENSG00000137133_HINT2,0;ENSG00000137103_TMEM8B,253
chr19:48637267-48638060	0.0711357	7.15956e-07	1.34517e-06	ENSG00000105516_DBP,0	ENSG00000105516_DBP,0;ENSG00000063180_CA11,8127
chr19:50510865-50511778	0.0710199	7.4634e-07	1.39939e-06	ENSG00000161677_JOSD2,0	ENSG00000161677_JOSD2,0;ENSG00000204653_ASPDH,2912
chr13:42271410-42272344	0.0709324	7.70144e-07	1.44107e-06	ENSG00000023516_AKAP11,0	ENSG00000023516_AKAP11,0
chr6:32968264-32969118	0.0709151	7.74927e-07	1.44706e-06	ENSG00000223837_AL645941.1,-1114;ENSG00000204256_BRD2,0;ENSG00000204257_HLA-DMA,0	ENSG00000204257_HLA-DMA,0;ENSG00000204256_BRD2,0
chr1:155001692-155002596	0.0708475	7.93941e-07	1.47954e-06	ENSG00000160685_ZBTB7B,-34
chr17:75784388-75785291	0.0708001	8.07518e-07	1.50179e-06	ENSG00000132478_UNK,0;ENSG00000132475_H3F3B,602	ENSG00000132478_UNK,0;ENSG00000132475_H3F3B,602
chr19:11374479-11375398	0.070663	8.4807e-07	1.574e-06	ENSG00000173928_SWSAP1,0;ENSG00000267277_AC024575.1,0	ENSG00000267277_AC024575.1,0;ENSG00000173928_SWSAP1,0
chr19:6737176-6738098	0.070595	8.68929e-07	1.60571e-06	ENSG00000125734_GPR108,0;ENSG00000125733_TRIP10,0	ENSG00000125734_GPR108,0;ENSG00000125733_TRIP10,0
chr11:68460107-68461004	0.0705925	8.69704e-07	1.60571e-06	ENSG00000110075_PPP6R3,0	ENSG00000110075_PPP6R3,0
chr8:101205321-101206192	0.0705902	8.70415e-07	1.60571e-06	ENSG00000271882_AP001330.4,-1956;ENSG00000120963_ZNF706,1	ENSG00000120963_ZNF706,1
chr4:18021594-18022535	0.070573	8.75777e-07	1.61235e-06	ENSG00000178177_LCORL,0	ENSG00000178177_LCORL,0
chr8:42152515-42153386	0.0704506	9.14824e-07	1.68085e-06	ENSG00000261449_AC103724.3,0;ENSG00000070718_AP3M2,0	ENSG00000261449_AC103724.3,0;ENSG00000070718_AP3M2,0
chr19:46600653-46601530	0.0704151	9.26469e-07	1.69599e-06	ENSG00000268423_AC093503.1,0;ENSG00000160014_CALM3,0;ENSG00000230510_PPP5D1,0	ENSG00000230510_PPP5D1,0;ENSG00000268423_AC093503.1,0;ENSG00000160014_CALM3,0
chr19:4065491-4066374	0.0704142	9.2677e-07	1.69599e-06	ENSG00000178951_ZBTB7A,525	ENSG00000178951_ZBTB7A,525
chr17:78840464-78841387	0.0704012	9.3105e-07	1.70042e-06	ENSG00000055483_USP36,54	ENSG00000055483_USP36,54
chr3:133573082-133573943	0.0702324	9.88641e-07	1.802e-06	ENSG00000091527_CDV3,0	ENSG00000091527_CDV3,0
chr11:65615086-65615926	0.0699689	1.08543e-06	1.97223e-06	ENSG00000173327_MAP3K11,0;ENSG00000197136_PCNX3,0	ENSG00000173327_MAP3K11,0;ENSG00000197136_PCNX3,0
chr16:53503004-53503910	0.0699631	1.08769e-06	1.97223e-06	ENSG00000166971_AKTIP,501	ENSG00000166971_AKTIP,501
chr1:212284854-212285749	0.069957	1.09001e-06	1.97223e-06	ENSG00000066027_PPP2R5A,0	ENSG00000066027_PPP2R5A,0
chr13:110712775-110713463	0.0699554	1.09066e-06	1.97223e-06	ENSG00000153487_ING1,39;ENSG00000134905_CARS2,140	ENSG00000153487_ING1,39;ENSG00000134905_CARS2,140
chr2:241508256-241509150	0.0698876	1.11709e-06	2.01606e-06	ENSG00000115694_STK25,580	ENSG00000115694_STK25,580
chr10:35126540-35127468	0.0697579	1.16949e-06	2.10646e-06	ENSG00000095794_CREM,0;ENSG00000230534_AL392046.1,0	ENSG00000230534_AL392046.1,0;ENSG00000095794_CREM,0
chr17:18183003-18183897	0.0696996	1.19376e-06	2.14595e-06	ENSG00000091542_ALKBH5,0;ENSG00000266677_AC087164.1,856	ENSG00000091542_ALKBH5,0;ENSG00000266677_AC087164.1,856
chr17:3636015-3636894	0.0696819	1.20125e-06	2.15518e-06	ENSG00000197417_SHPK,0;ENSG00000040531_CTNS,0	ENSG00000197417_SHPK,0;ENSG00000040531_CTNS,0
chr2:218269877-218270774	0.0696457	1.21668e-06	2.1786e-06	ENSG00000127837_AAMP,0;ENSG00000127838_PNKD,0	ENSG00000127837_AAMP,0;ENSG00000127838_PNKD,0
chr12:57752015-57752917	0.0696357	1.22098e-06	2.18203e-06		ENSG00000135446_CDK4,3096
chr10:99620297-99621125	0.0695738	1.24787e-06	2.22574e-06	ENSG00000155287_SLC25A28,0;ENSG00000260475_AL353719.1,0	ENSG00000155287_SLC25A28,0;ENSG00000260475_AL353719.1,0
chr22:33920654-33921528	0.0694727	1.29306e-06	2.30185e-06	ENSG00000273082_Z73429.1,-894;ENSG00000133424_LARGE1,1313	ENSG00000133424_LARGE1,1313
chr1:1615135-1615930	0.0694529	1.30205e-06	2.31336e-06	ENSG00000197530_MIB2,0;ENSG00000272106_AL691432.2,0	ENSG00000272106_AL691432.2,0;ENSG00000197530_MIB2,0
chr16:1782292-1783201	0.0691929	1.42641e-06	2.52938e-06	ENSG00000095906_NUBP2,0	ENSG00000095906_NUBP2,0;ENSG00000162032_SPSB3,10499
chr11:10857712-10858578	0.0691341	1.4561e-06	2.57705e-06	ENSG00000247271_ZBED5-AS1,0;ENSG00000236287_ZBED5,218	ENSG00000247271_ZBED5-AS1,0;ENSG00000236287_ZBED5,218
chr19:55407552-55408489	0.0689962	1.52803e-06	2.69912e-06	ENSG00000108106_UBE2S,0	ENSG00000108106_UBE2S,0
chr22:36387703-36388613	0.0689878	1.53251e-06	2.70183e-06	ENSG00000223695_FO393418.1,-13;ENSG00000100345_MYH9,0	ENSG00000100345_MYH9,0
chr14:58297816-58298671	0.0689387	1.55901e-06	2.74326e-06	ENSG00000257621_PSMA3-AS1,0;ENSG00000139971_ARMH4,0;ENSG00000032219_ARID4A,0	ENSG00000139971_ARMH4,0;ENSG00000257621_PSMA3-AS1,0;ENSG00000032219_ARID4A,0
chr1:23344038-23344920	0.0687587	1.65994e-06	2.91524e-06	ENSG00000125944_HNRNPR,0	ENSG00000125944_HNRNPR,0
chr2:96815928-96816736	0.0684932	1.82037e-06	3.19088e-06	ENSG00000168763_CNNM3,0	ENSG00000168763_CNNM3,0
chr11:64878251-64879167	0.0684171	1.86901e-06	3.26987e-06		ENSG00000110047_EHD1,9129
chr1:244970330-244971187	0.068379	1.89384e-06	3.307e-06	ENSG00000272195_AL356512.1,0;ENSG00000203666_EFCAB2,625	ENSG00000272195_AL356512.1,0;ENSG00000203666_EFCAB2,625
chr1:85276193-85277094	0.0683551	1.90961e-06	3.32817e-06	ENSG00000223653_AL078459.1,0;ENSG00000142867_BCL10,0	ENSG00000142867_BCL10,0;ENSG00000223653_AL078459.1,0
chr2:177212217-177213046	0.0683033	1.94416e-06	3.38196e-06	ENSG00000170144_HNRNPA3,0;ENSG00000229337_AC079305.3,0	ENSG00000229337_AC079305.3,0;ENSG00000170144_HNRNPA3,0
chr12:89709157-89709925	0.0680098	2.15154e-06	3.73559e-06	ENSG00000070961_ATP2B1,0;ENSG00000271614_ATP2B1-AS1,198	ENSG00000070961_ATP2B1,0;ENSG00000271614_ATP2B1-AS1,198
chr1:1115814-1116715	0.0679818	2.17238e-06	3.76464e-06	ENSG00000131591_C1orf159,0	ENSG00000131591_C1orf159,0
chr17:82098163-82098936	0.0679691	2.18191e-06	3.774e-06	ENSG00000169710_FASN,0	ENSG00000169710_FASN,0
chr1:43946264-43947188	0.0678701	2.25752e-06	3.89742e-06	ENSG00000237950_AL357079.1,0;ENSG00000117408_IPO13,0	ENSG00000237950_AL357079.1,0;ENSG00000117408_IPO13,0
chr20:3888785-3889664	0.0678532	2.27063e-06	3.91266e-06	ENSG00000125779_PANK2,0;ENSG00000229539_AL353194.1,0	ENSG00000229539_AL353194.1,0;ENSG00000125779_PANK2,0
chr5:81971626-81972511	0.0678225	2.29473e-06	3.94676e-06	ENSG00000152348_ATG10,0	ENSG00000152348_ATG10,0
chr8:28889768-28890689	0.0677455	2.35624e-06	4.03931e-06	ENSG00000104299_INTS9,0;ENSG00000147421_HMBOX1,0	ENSG00000104299_INTS9,0;ENSG00000147421_HMBOX1,0
chr19:14518154-14518885	0.0677441	2.35737e-06	4.03931e-06	ENSG00000099797_TECR,1069	ENSG00000099797_TECR,1069;ENSG00000132002_DNAJB1,10885
chr14:75660662-75661537	0.0677005	2.39294e-06	4.09259e-06	ENSG00000133935_ERG28,0	ENSG00000133935_ERG28,0;ENSG00000119685_TTLL5,27037;ENSG00000119686_FLVCR2,82042
chr19:40465454-40466368	0.0676404	2.44277e-06	4.17003e-06	ENSG00000090013_BLVRB,0;ENSG00000160460_SPTBN4,0	ENSG00000090013_BLVRB,0;ENSG00000160460_SPTBN4,0
chr11:47766973-47767835	0.0675324	2.53481e-06	4.31909e-06	ENSG00000109920_FNBP4,0	ENSG00000109920_FNBP4,0
chr11:64185411-64186334	0.0674878	2.57382e-06	4.3774e-06	ENSG00000168439_STIP1,139	ENSG00000168439_STIP1,139
chr15:72117671-72118604	0.0674777	2.58271e-06	4.38438e-06	ENSG00000066933_MYO9A,0	ENSG00000066933_MYO9A,0;ENSG00000166192_SENP8,3413
chr6:73520850-73521721	0.0674702	2.58935e-06	4.38536e-06	ENSG00000229862_AL121972.1,-1897	ENSG00000156508_EEF1A1,2076
chr19:19385174-19386093	0.0674662	2.59287e-06	4.38536e-06	ENSG00000167491_GATAD2A,0	ENSG00000167491_GATAD2A,0
chr4:184649104-184649977	0.0673959	2.65598e-06	4.48381e-06	ENSG00000164305_CASP3,0;ENSG00000164306_PRIMPOL,0	ENSG00000164305_CASP3,0;ENSG00000164306_PRIMPOL,0
chr7:6104358-6105258	0.067377	2.6732e-06	4.50457e-06	ENSG00000106346_USP42,0	ENSG00000106346_USP42,0
chr16:87391718-87392625	0.067333	2.71366e-06	4.56039e-06	ENSG00000103264_FBXO31,0	ENSG00000103264_FBXO31,0;ENSG00000140941_MAP1LC3B,7765
chr10:3785006-3785896	0.0673301	2.7163e-06	4.56039e-06	ENSG00000067082_KLF6,0	ENSG00000067082_KLF6,0
chr13:33542272-33543187	0.0673022	2.74233e-06	4.59567e-06		ENSG00000230490_AL139383.1,133609
chr4:56435541-56436253	0.0672433	2.798e-06	4.68038e-06	ENSG00000128059_PPAT,0;ENSG00000128050_PAICS,0	ENSG00000128059_PPAT,0;ENSG00000128050_PAICS,0
chr4:1870697-1871603	0.0672166	2.82359e-06	4.71457e-06	ENSG00000109685_NSD2,0	ENSG00000109685_NSD2,0
chr1:248837910-248838654	0.0672048	2.83491e-06	4.72485e-06	ENSG00000171161_ZNF672,0	ENSG00000171161_ZNF672,0
chr8:25458272-25459126	0.0670784	2.9596e-06	4.9237e-06	ENSG00000184661_CDCA2,-73;ENSG00000104756_KCTD9,0	ENSG00000104756_KCTD9,0
chr19:58543844-58544734	0.0670294	3.00936e-06	4.9974e-06	ENSG00000130726_TRIM28,0	ENSG00000130726_TRIM28,0
chr2:224585124-224586021	0.0669953	3.04441e-06	5.04644e-06	ENSG00000036257_CUL3,0	ENSG00000036257_CUL3,0
chr17:44186419-44187297	0.0669425	3.09952e-06	5.1285e-06	ENSG00000267080_ASB16-AS1,0;ENSG00000168591_TMUB2,0	ENSG00000267080_ASB16-AS1,0;ENSG00000168591_TMUB2,0
chr14:51094811-51095671	0.0668573	3.19043e-06	5.26939e-06	ENSG00000100505_TRIM9,390	ENSG00000100505_TRIM9,390
chr19:14136422-14137352	0.066808	3.24421e-06	5.34857e-06	ENSG00000105011_ASF1B,0;ENSG00000267169_AC022098.1,0	ENSG00000105011_ASF1B,0;ENSG00000267169_AC022098.1,0
chr11:72112061-72112938	0.06679	3.26404e-06	5.37158e-06	ENSG00000110203_FOLR3,-1931;ENSG00000110200_ANAPC15,0	ENSG00000110200_ANAPC15,0
chr16:67183432-67184281	0.0665466	3.5441e-06	5.822e-06	ENSG00000196123_KIAA0895L,0	ENSG00000196123_KIAA0895L,0
chr20:35771623-35772560	0.0665319	3.56174e-06	5.84049e-06	ENSG00000025293_PHF20,0	ENSG00000025293_PHF20,0
chr10:25016200-25017167	0.0665162	3.58072e-06	5.86111e-06	ENSG00000185875_THNSL1,0	ENSG00000185875_THNSL1,0;ENSG00000151023_ENKUR,45112
chr17:2401083-2401899	0.0663724	3.75854e-06	6.14119e-06	ENSG00000070444_MNT,0	ENSG00000070444_MNT,0
chr5:140401011-140401918	0.0663652	3.76769e-06	6.14516e-06	ENSG00000249637_AC008438.1,0;ENSG00000131503_ANKHD1,0	ENSG00000249637_AC008438.1,0;ENSG00000131503_ANKHD1,0
chr9:129177858-129178694	0.0662379	3.93261e-06	6.40274e-06	ENSG00000188483_IER5L,0;ENSG00000204055_AL158151.1,1087	ENSG00000188483_IER5L,0;ENSG00000204055_AL158151.1,1087
chr7:158829129-158830045	0.0662034	3.97854e-06	6.46601e-06	ENSG00000117868_ESYT2,208	ENSG00000117868_ESYT2,208
chr22:46070886-46071734	0.0661421	4.06122e-06	6.58869e-06	ENSG00000235159_AL121672.2,-995	ENSG00000197182_MIRLET7BHG,17017
chr5:179698312-179699216	0.066084	4.14116e-06	6.70648e-06		ENSG00000127022_CANX,19684
chr8:93916295-93917187	0.0659102	4.3896e-06	7.09627e-06	ENSG00000264448_MIR378D2HG,0	ENSG00000264448_MIR378D2HG,0;ENSG00000164951_PDP1,58488
chr6:15245260-15246059	0.0658766	4.43922e-06	7.1595e-06	ENSG00000271888_AL136162.1,-260;ENSG00000008083_JARID2,-10
chr9:72364853-72365746	0.0658731	4.44436e-06	7.1595e-06	ENSG00000107372_ZFAND5,0	ENSG00000107372_ZFAND5,0
chr2:207529504-207530396	0.0658641	4.45769e-06	7.16833e-06	ENSG00000118260_CREB1,0;ENSG00000223725_AC009226.1,0	ENSG00000223725_AC009226.1,0;ENSG00000118260_CREB1,0
chr16:22190446-22191307	0.0657963	4.55993e-06	7.31988e-06		ENSG00000183921_SDR42E2,24863
chr9:136790619-136791531	0.0656817	4.73777e-06	7.59206e-06	ENSG00000244187_TMEM141,0	ENSG00000244187_TMEM141,0
chr8:26382767-26383702	0.0656671	4.76087e-06	7.61573e-06	ENSG00000104765_BNIP3L,0	ENSG00000104765_BNIP3L,0
chr18:3012793-3013609	0.0656011	4.86674e-06	7.7715e-06	ENSG00000101577_LPIN2,0	ENSG00000101577_LPIN2,0
chr5:138542886-138543796	0.0655576	4.93787e-06	7.87134e-06	ENSG00000120705_ETF1,0	ENSG00000120705_ETF1,0
chr3:50235601-50236522	0.0653827	5.23353e-06	8.32815e-06		ENSG00000114353_GNAI2,9309
chr11:71786663-71787517	0.0653247	5.33538e-06	8.47548e-06	ENSG00000158483_FAM86C1,0	ENSG00000158483_FAM86C1,0;ENSG00000248671_ALG1L9P,30721
chr1:3900300-3901059	0.0652868	5.40291e-06	8.56787e-06	ENSG00000198912_C1orf174,-7;ENSG00000236423_LINC01134,0	ENSG00000236423_LINC01134,0
chr5:137754113-137755019	0.0651367	5.67844e-06	8.98923e-06	ENSG00000177733_HNRNPA0,0	ENSG00000177733_HNRNPA0,0
chr5:180809961-180810797	0.0647703	6.40847e-06	1.01274e-05		ENSG00000131446_MGAT1,4855
chr13:51583819-51584735	0.0647291	6.49603e-06	1.0248e-05	ENSG00000139668_WDFY2,0	ENSG00000139668_WDFY2,0
chr14:99480668-99481597	0.0647144	6.5274e-06	1.02798e-05	ENSG00000183576_SETD3,0;ENSG00000090061_CCNK,0	ENSG00000183576_SETD3,0;ENSG00000090061_CCNK,0
chr7:87152037-87152947	0.0646434	6.68169e-06	1.05047e-05	ENSG00000135164_DMTF1,0;ENSG00000224046_AC005076.1,0	ENSG00000224046_AC005076.1,0;ENSG00000135164_DMTF1,0
chr19:10653708-10654608	0.0646059	6.76444e-06	1.06166e-05	ENSG00000267100_ILF3-DT,0;ENSG00000129351_ILF3,0	ENSG00000267100_ILF3-DT,0;ENSG00000129351_ILF3,0
chr10:119725515-119726410	0.0643934	7.25284e-06	1.13636e-05	ENSG00000198825_INPP5F,0	ENSG00000198825_INPP5F,0
chr1:66924689-66925599	0.0643585	7.33605e-06	1.14743e-05	ENSG00000152763_WDR78,0;ENSG00000198160_MIER1,0	ENSG00000152763_WDR78,0;ENSG00000198160_MIER1,0
chr3:155870093-155870954	0.0642663	7.56074e-06	1.18029e-05	ENSG00000163655_GMPS,0	ENSG00000163655_GMPS,0
chr17:68247511-68248438	0.0642618	7.57191e-06	1.18029e-05	ENSG00000196704_AMZ2,0;ENSG00000265100_AC005332.1,0	ENSG00000265100_AC005332.1,0;ENSG00000196704_AMZ2,0
chr2:197452942-197453846	0.0640091	8.22279e-06	1.27957e-05	ENSG00000115520_COQ10B,0	ENSG00000115520_COQ10B,0
chr15:75453814-75454681	0.0639818	8.29616e-06	1.28879e-05	ENSG00000276744_AC105137.2,0;ENSG00000169375_SIN3A,1161	ENSG00000276744_AC105137.2,0;ENSG00000169375_SIN3A,1161
chr9:136848977-136849896	0.0638714	8.59943e-06	1.33364e-05	ENSG00000177943_MAMDC4,-1047;ENSG00000054148_PHPT1,253	ENSG00000054148_PHPT1,253
chr8:42842685-42843609	0.063833	8.70733e-06	1.34809e-05	ENSG00000286837_AC087533.1,0;ENSG00000131931_THAP1,0	ENSG00000131931_THAP1,0;ENSG00000286837_AC087533.1,0
chr22:24554959-24555765	0.0637558	8.92845e-06	1.37999e-05	ENSG00000286070_GGT1,-242;ENSG00000100028_SNRPD3,-193;ENSG00000138867_GUCD1,170	ENSG00000138867_GUCD1,170
chr7:108525804-108526702	0.0637311	9.00014e-06	1.38872e-05		ENSG00000135241_PNPLA8,42964
chr15:65791813-65792698	0.0637177	9.03956e-06	1.39246e-05	ENSG00000174485_DENND4A,0	ENSG00000174485_DENND4A,0;ENSG00000103769_RAB11A,65759
chr14:101760301-101761146	0.0635972	9.39934e-06	1.44544e-05	ENSG00000078304_PPP2R5C,-652
chr22:49853247-49854177	0.063433	9.91201e-06	1.52173e-05	ENSG00000100426_ZBED4,0;ENSG00000279494_AL117328.2,1822	ENSG00000100426_ZBED4,0;ENSG00000279494_AL117328.2,1822
chr4:158671693-158672618	0.0633593	1.01505e-05	1.55573e-05	ENSG00000171503_ETFDH,0;ENSG00000205208_C4orf46,0	ENSG00000205208_C4orf46,0;ENSG00000171503_ETFDH,0
chr13:30617249-30618111	0.0632628	1.04711e-05	1.60219e-05	ENSG00000189403_HMGB1,0;ENSG00000132952_USPL1,0	ENSG00000189403_HMGB1,0;ENSG00000132952_USPL1,0
chr11:111601902-111602783	0.0632105	1.06491e-05	1.62669e-05	ENSG00000170145_SIK2,0	ENSG00000170145_SIK2,0
chr19:1249254-1249995	0.063141	1.08901e-05	1.66074e-05	ENSG00000167470_MIDN,701	ENSG00000167470_MIDN,701
chr21:44338862-44339745	0.0631229	1.09533e-05	1.66761e-05	ENSG00000232969_AP001062.2,0;ENSG00000160226_CFAP410,0	ENSG00000160226_CFAP410,0;ENSG00000232969_AP001062.2,0
chr16:4615944-4616866	0.06305	1.12133e-05	1.70434e-05	ENSG00000153443_UBALD1,-917;ENSG00000102858_MGRN1,0	ENSG00000102858_MGRN1,0
chr12:118372547-118373459	0.0630392	1.12522e-05	1.70743e-05	ENSG00000135090_TAOK3,0	ENSG00000135090_TAOK3,0
chr13:97432761-97433620	0.0629896	1.14325e-05	1.73191e-05	ENSG00000125249_RAP2A,-549;ENSG00000286416_AL442067.3,374	ENSG00000286416_AL442067.3,374
chr12:45990259-45991083	0.0629757	1.14838e-05	1.7368e-05	ENSG00000139218_SCAF11,1037	ENSG00000139218_SCAF11,1037
chr7:44999568-45000440	0.0629288	1.16579e-05	1.76023e-05	ENSG00000136280_CCM2,93	ENSG00000136280_CCM2,93
chr22:37608288-37609230	0.0628574	1.19276e-05	1.79799e-05	ENSG00000100083_GGA1,0	ENSG00000100083_GGA1,0
chr2:128027070-128027759	0.0628192	1.20743e-05	1.81711e-05	ENSG00000136715_SAP130,361	ENSG00000136715_SAP130,361
chr13:19863273-19864187	0.0626919	1.25762e-05	1.88952e-05	ENSG00000132950_ZMYM5,0;ENSG00000275964_AL355001.2,0	ENSG00000132950_ZMYM5,0;ENSG00000275964_AL355001.2,0
chr12:55973431-55974354	0.0626593	1.27077e-05	1.90616e-05	ENSG00000185664_PMEL,-114;ENSG00000111540_RAB5B,0	ENSG00000111540_RAB5B,0
chr7:155297270-155298134	0.0626145	1.28907e-05	1.93043e-05	ENSG00000273117_AC144652.1,0;ENSG00000186480_INSIG1,0	ENSG00000273117_AC144652.1,0;ENSG00000186480_INSIG1,0
chr1:185156731-185157612	0.0625514	1.31527e-05	1.96645e-05	ENSG00000121486_TRMT1L,0;ENSG00000116668_SWT1,0	ENSG00000121486_TRMT1L,0;ENSG00000116668_SWT1,0
chr8:26577168-26577951	0.0625397	1.32018e-05	1.97058e-05		ENSG00000092964_DPYSL2,63137
chr2:65129855-65130786	0.0625281	1.32506e-05	1.97465e-05	ENSG00000138069_RAB1A,0	ENSG00000138069_RAB1A,0
chr9:100098725-100099626	0.0624835	1.34404e-05	1.99966e-05	ENSG00000023318_ERP44,0;ENSG00000119509_INVS,0	ENSG00000023318_ERP44,0;ENSG00000119509_INVS,0
chr19:39341777-39342705	0.0623341	1.40949e-05	2.09364e-05	ENSG00000269246_AC011445.2,0;ENSG00000130755_GMFG,0;ENSG00000179134_SAMD4B,0	ENSG00000130755_GMFG,0;ENSG00000269246_AC011445.2,0;ENSG00000179134_SAMD4B,0
chr4:152779372-152780288	0.0622565	1.44463e-05	2.14236e-05	ENSG00000169989_TIGD4,0;ENSG00000164144_ARFIP1,0	ENSG00000169989_TIGD4,0;ENSG00000164144_ARFIP1,0
chr19:44890468-44891380	0.0622237	1.45977e-05	2.16132e-05	ENSG00000130204_TOMM40,0;ENSG00000267282_AC011481.2,0	ENSG00000267282_AC011481.2,0;ENSG00000130204_TOMM40,0
chr1:6784766-6785588	0.0622175	1.46264e-05	2.16206e-05	ENSG00000237436_CAMTA1-DT,0;ENSG00000171735_CAMTA1,0	ENSG00000237436_CAMTA1-DT,0;ENSG00000171735_CAMTA1,0
chr11:47407954-47408874	0.062145	1.49663e-05	2.20874e-05	ENSG00000255197_AC090559.1,495;ENSG00000165915_SLC39A13,822	ENSG00000255197_AC090559.1,495;ENSG00000165915_SLC39A13,822
chr1:167935885-167936783	0.0620406	1.54696e-05	2.27934e-05	ENSG00000143164_DCAF6,102;ENSG00000143158_MPC2,289	ENSG00000143164_DCAF6,102;ENSG00000143158_MPC2,289
chr18:79068758-79069689	0.0618483	1.64385e-05	2.4182e-05	ENSG00000166377_ATP9B,0	ENSG00000166377_ATP9B,0
chr7:138001766-138002602	0.061643	1.75368e-05	2.57563e-05	ENSG00000182158_CREB3L2,0;ENSG00000122787_AKR1D1,0	ENSG00000182158_CREB3L2,0;ENSG00000122787_AKR1D1,0
chr9:133459463-133460325	0.0616319	1.7598e-05	2.58047e-05	ENSG00000160325_CACFD1,0	ENSG00000160325_CACFD1,0
chr16:2882465-2883341	0.0615676	1.79577e-05	2.62901e-05	ENSG00000162076_FLYWCH2,0	ENSG00000162076_FLYWCH2,0
chr14:102592061-102592940	0.0615548	1.803e-05	2.63538e-05	ENSG00000089902_RCOR1,0	ENSG00000089902_RCOR1,0
chr5:61331642-61332506	0.0614997	1.83443e-05	2.67704e-05	ENSG00000130449_ZSWIM6,0	ENSG00000130449_ZSWIM6,0
chr22:42079287-42080215	0.0614825	1.84435e-05	2.68723e-05	ENSG00000183172_SMDT1,0	ENSG00000183172_SMDT1,0;ENSG00000177096_PHETA2,5039
chr2:27369980-27370912	0.0613957	1.89526e-05	2.75701e-05	ENSG00000115211_EIF2B4,0;ENSG00000115234_SNX17,0	ENSG00000115211_EIF2B4,0;ENSG00000115234_SNX17,0
chr3:23945616-23946417	0.0611621	2.03895e-05	2.96133e-05	ENSG00000197885_NKIRAS1,174;ENSG00000174738_NR1D2,330	ENSG00000197885_NKIRAS1,174;ENSG00000174738_NR1D2,330
chr1:2586206-2587089	0.0610452	2.11471e-05	3.06401e-05	ENSG00000157870_PRXL2B,0	ENSG00000157870_PRXL2B,0
chr11:62831585-62832464	0.0610427	2.11635e-05	3.06401e-05	ENSG00000162236_STX5,0;ENSG00000256690_AP001160.1,0;ENSG00000283268_TEX54,339	ENSG00000162236_STX5,0;ENSG00000256690_AP001160.1,0;ENSG00000283268_TEX54,339;ENSG00000133316_WDR74,9345
chr2:70142232-70143063	0.0610362	2.12066e-05	3.06541e-05
chr2:85538626-85539479	0.0609763	2.16059e-05	3.11821e-05	ENSG00000286532_PARTICL,0;ENSG00000168906_MAT2A,0	ENSG00000286532_PARTICL,0;ENSG00000168906_MAT2A,0
chr17:77140270-77141202	0.0609424	2.1835e-05	3.14631e-05		ENSG00000129657_SEC14L1,51521
chr1:154936593-154937534	0.0609264	2.19441e-05	3.15706e-05	ENSG00000163344_PMVK,0;ENSG00000270361_AL451085.1,0	ENSG00000163344_PMVK,0;ENSG00000270361_AL451085.1,0
chr19:2840836-2841771	0.06091	2.20561e-05	3.16819e-05	ENSG00000186300_ZNF555,0	ENSG00000186300_ZNF555,0
chr21:14382853-14383766	0.0608875	2.22116e-05	3.18552e-05	ENSG00000155304_HSPA13,0	ENSG00000155304_HSPA13,0
chr5:168579197-168580086	0.0608699	2.23334e-05	3.19797e-05	ENSG00000120137_PANK3,0	ENSG00000120137_PANK3,0
chr1:27234080-27234986	0.0606635	2.38107e-05	3.40419e-05	ENSG00000224311_AL590640.1,0;ENSG00000142784_WDTC1,0	ENSG00000224311_AL590640.1,0;ENSG00000142784_WDTC1,0
chr11:45846932-45847828	0.0605094	2.49743e-05	3.56497e-05	ENSG00000121671_CRY2,0	ENSG00000121671_CRY2,0
chr7:35800587-35801485	0.0604859	2.51568e-05	3.58543e-05	ENSG00000228878_SEPTIN7-AS1,0;ENSG00000122545_SEPTIN7,0	ENSG00000228878_SEPTIN7-AS1,0;ENSG00000122545_SEPTIN7,0
chr2:43226307-43227139	0.0604116	2.57406e-05	3.66293e-05	ENSG00000279873_LINC01126,-71;ENSG00000152518_ZFP36L2,0	ENSG00000152518_ZFP36L2,0
chr12:106773936-106774871	0.0603966	2.58603e-05	3.67425e-05	ENSG00000111785_RIC8B,0;ENSG00000257545_AC079385.1,55	ENSG00000111785_RIC8B,0;ENSG00000257545_AC079385.1,55
chr2:178450730-178451623	0.0602728	2.68669e-05	3.81136e-05	ENSG00000204311_PJVK,0;ENSG00000180228_PRKRA,0	ENSG00000180228_PRKRA,0;ENSG00000204311_PJVK,0
chr7:155002776-155003714	0.060224	2.72739e-05	3.8631e-05	ENSG00000157212_PAXIP1,0;ENSG00000273344_PAXIP1-AS1,0	ENSG00000157212_PAXIP1,0;ENSG00000273344_PAXIP1-AS1,0
chr14:74084189-74085124	0.0601885	2.75731e-05	3.89944e-05	ENSG00000119711_ALDH6A1,0;ENSG00000205659_LIN52,0	ENSG00000119711_ALDH6A1,0;ENSG00000205659_LIN52,0
chr12:39442889-39443781	0.0601782	2.76608e-05	3.90581e-05	ENSG00000139116_KIF21A,0	ENSG00000139116_KIF21A,0
chr2:61538083-61539028	0.0601289	2.80834e-05	3.95936e-05	ENSG00000082898_XPO1,0	ENSG00000082898_XPO1,0
chr19:38849820-38850719	0.0599864	2.934e-05	4.13017e-05	ENSG00000104824_HNRNPL,1628	ENSG00000104824_HNRNPL,1628
chr22:29603073-29603962	0.0597593	3.14527e-05	4.42077e-05	ENSG00000186575_NF2,0	ENSG00000186575_NF2,0
chr7:44748171-44749087	0.0597322	3.1714e-05	4.45066e-05	ENSG00000122515_ZMIZ2,0	ENSG00000122515_ZMIZ2,0
chr1:151281715-151282524	0.0597216	3.18175e-05	4.45834e-05	ENSG00000232671_ZNF687-AS1,0;ENSG00000143373_ZNF687,97	ENSG00000232671_ZNF687-AS1,0;ENSG00000143373_ZNF687,97
chr2:73071107-73071998	0.059664	3.23822e-05	4.53054e-05		ENSG00000144040_SFXN5,3621
chr10:48306235-48307087	0.0595331	3.37003e-05	4.70775e-05	ENSG00000107643_MAPK8,0	ENSG00000107643_MAPK8,0
chr1:15524268-15525005	0.0594831	3.42183e-05	4.77283e-05	ENSG00000116138_DNAJC16,-1808;ENSG00000132906_CASP9,1529	ENSG00000132906_CASP9,1529
chr20:62121801-62122701	0.0594641	3.44162e-05	4.79312e-05	ENSG00000149657_LSM14B,0	ENSG00000149657_LSM14B,0
chr9:89310480-89311395	0.059252	3.67078e-05	5.1045e-05	ENSG00000123975_CKS2,0	ENSG00000123975_CKS2,0
chr19:6424705-6425614	0.0591951	3.73459e-05	5.18535e-05	ENSG00000088247_KHSRP,0	ENSG00000088247_KHSRP,0
chr16:1308901-1309724	0.059169	3.76425e-05	5.21862e-05	ENSG00000274751_AC120498.9,0;ENSG00000103275_UBE2I,21	ENSG00000274751_AC120498.9,0;ENSG00000103275_UBE2I,21
chr6:18154816-18155742	0.0591471	3.78931e-05	5.24541e-05	ENSG00000137364_TPMT,0;ENSG00000165097_KDM1B,0	ENSG00000137364_TPMT,0;ENSG00000165097_KDM1B,0
chr2:241701836-241702635	0.0591086	3.83378e-05	5.29895e-05		ENSG00000168395_ING5,14751
chr19:50724497-50725428	0.0589584	4.01188e-05	5.53676e-05	ENSG00000105472_CLEC11A,1133	ENSG00000105472_CLEC11A,1133
chr4:1346644-1347572	0.0588651	4.12635e-05	5.68616e-05	ENSG00000163945_UVSSA,0	ENSG00000163945_UVSSA,0
chr7:100538598-100539509	0.0588435	4.1533e-05	5.71469e-05	ENSG00000106351_AGFG2,0	ENSG00000106351_AGFG2,0
chr12:133080194-133080945	0.0587684	4.24837e-05	5.83673e-05	ENSG00000196387_ZNF140,356	ENSG00000196387_ZNF140,356
chr11:3422473-3423315	0.0587478	4.27482e-05	5.8574e-05
chr1:203305002-203305899	0.0587467	4.27622e-05	5.8574e-05	ENSG00000233791_LINC01136,0;ENSG00000159388_BTG2,0	ENSG00000233791_LINC01136,0;ENSG00000159388_BTG2,0
chr19:48993109-48994005	0.0587177	4.31364e-05	5.89982e-05	ENSG00000104812_GYS1,0;ENSG00000183207_RUVBL2,0	ENSG00000104812_GYS1,0;ENSG00000183207_RUVBL2,0
chr13:110914847-110915745	0.0586056	4.46156e-05	6.09303e-05	ENSG00000277767_AL442128.2,-259;ENSG00000088448_ANKRD10,0	ENSG00000088448_ANKRD10,0
chr10:110918912-110919765	0.0584394	4.68961e-05	6.39492e-05	ENSG00000214413_BBIP1,0;ENSG00000108061_SHOC2,0	ENSG00000214413_BBIP1,0;ENSG00000108061_SHOC2,0
chr3:38164822-38165677	0.0582581	4.95093e-05	6.74122e-05	ENSG00000172939_OXSR1,0	ENSG00000172939_OXSR1,0
chr14:74493107-74494025	0.0582502	4.96253e-05	6.74698e-05	ENSG00000165898_ISCA2,0;ENSG00000119655_NPC2,152	ENSG00000165898_ISCA2,0;ENSG00000119655_NPC2,152
chr7:21427018-21427621	0.0581125	5.17069e-05	7.01955e-05	ENSG00000105866_SP4,-422
chr2:62705138-62706023	0.0579785	5.38114e-05	7.29443e-05		ENSG00000115504_EHBP1,31287
chr9:81689295-81690219	0.0579571	5.4155e-05	7.33015e-05	ENSG00000196781_TLE1,0;ENSG00000233926_AL591368.1,0	ENSG00000196781_TLE1,0;ENSG00000233926_AL591368.1,0
chr17:18038901-18039801	0.0576266	5.973e-05	8.07281e-05	ENSG00000171953_ATPAF2,0;ENSG00000141034_GID4,0	ENSG00000171953_ATPAF2,0;ENSG00000141034_GID4,0
chr5:36241580-36242482	0.0573316	6.51631e-05	8.79413e-05	ENSG00000152620_NADK2,0	ENSG00000152620_NADK2,0
chr19:48468757-48469595	0.0573196	6.53929e-05	8.81215e-05	ENSG00000105443_CYTH2,0;ENSG00000268530_AC008403.2,98	ENSG00000105443_CYTH2,0;ENSG00000268530_AC008403.2,98
chr6:36985892-36986830	0.0568572	7.48894e-05	0.00010077	ENSG00000137409_MTCH1,0	ENSG00000137409_MTCH1,0
chr4:10116432-10117321	0.0568395	7.5277e-05	0.000101143	ENSG00000071127_WDR1,0	ENSG00000071127_WDR1,0
chr10:21533623-21534522	0.0566968	7.84772e-05	0.000105288		ENSG00000078403_MLLT10,8977
chr2:64750791-64751715	0.0566659	7.91875e-05	0.000106086	ENSG00000179833_SERTAD2,0	ENSG00000179833_SERTAD2,0
chr18:32092072-32092919	0.0565795	8.12033e-05	0.000108627	ENSG00000265008_AC011825.4,0;ENSG00000134758_RNF138,198	ENSG00000265008_AC011825.4,0;ENSG00000134758_RNF138,198
chr6:37818979-37819877	0.056446	8.44145e-05	0.000112758	ENSG00000225945_AL121574.1,0;ENSG00000156639_ZFAND3,0	ENSG00000225945_AL121574.1,0;ENSG00000156639_ZFAND3,0
chr19:14529034-14529939	0.0564139	8.52051e-05	0.000113648	ENSG00000132002_DNAJB1,0	ENSG00000132002_DNAJB1,0;ENSG00000099797_TECR,11949
chr16:527123-528019	0.0563421	8.69971e-05	0.000115869	ENSG00000277142_LINC00235,0;ENSG00000103326_CAPN15,0	ENSG00000277142_LINC00235,0;ENSG00000103326_CAPN15,0
chr2:144332041-144332921	0.0562937	8.82256e-05	0.000117335	ENSG00000121964_GTDC1,0	ENSG00000121964_GTDC1,0
chr17:44199720-44200584	0.0562462	8.94466e-05	0.000118786	ENSG00000087152_ATXN7L3,0;ENSG00000267394_AC004596.1,838	ENSG00000087152_ATXN7L3,0;ENSG00000267394_AC004596.1,838
chr4:3955264-3956196	0.0559139	9.84466e-05	0.000130549
chr19:1490469-1491302	0.0559011	9.88092e-05	0.00013084	ENSG00000115257_PCSK4,0;ENSG00000115255_REEP6,0	ENSG00000115257_PCSK4,0;ENSG00000115255_REEP6,0
chr19:10835560-10836430	0.0557162	0.000104201	0.00013778	ENSG00000214212_C19orf38,-145;ENSG00000099203_TMED1,0	ENSG00000099203_TMED1,0
chr17:19377841-19378687	0.0556331	0.000106711	0.000140896	ENSG00000108641_B9D1,0;ENSG00000166484_MAPK7,120	ENSG00000108641_B9D1,0;ENSG00000166484_MAPK7,120
chr5:43121026-43121894	0.0556074	0.000107501	0.000141734		ENSG00000172262_ZNF131,55850
chr17:7403975-7404764	0.0555032	0.000110753	0.000145812	ENSG00000169992_NLGN2,-110;ENSG00000205544_TMEM256,0	ENSG00000205544_TMEM256,0
chr18:51197424-51198328	0.0553441	0.000115899	0.000152367		ENSG00000176624_MEX3C,19976
chr13:45340876-45341705	0.0553251	0.00011653	0.000152977	ENSG00000170919_TPT1-AS1,0;ENSG00000133112_TPT1,0;ENSG00000273149_AL138963.4,837	ENSG00000133112_TPT1,0;ENSG00000170919_TPT1-AS1,0;ENSG00000273149_AL138963.4,837
chr7:66628363-66629302	0.0552691	0.000118404	0.000155214	ENSG00000243335_KCTD7,0	ENSG00000243335_KCTD7,0
chr8:66428368-66429284	0.0551895	0.000121114	0.00015854	ENSG00000246145_RRS1-AS1,0;ENSG00000179041_RRS1,0	ENSG00000246145_RRS1-AS1,0;ENSG00000179041_RRS1,0;ENSG00000287127_AC009879.4,3086
chr13:113490412-113491303	0.0551413	0.000122788	0.000160501	ENSG00000150401_DCUN1D2,0;ENSG00000150403_TMCO3,0	ENSG00000150401_DCUN1D2,0;ENSG00000150403_TMCO3,0
chr17:8630567-8631443	0.0551262	0.000123313	0.000160958	ENSG00000133026_MYH10,0	ENSG00000133026_MYH10,0
chr6:37169543-37170467	0.0550874	0.000124679	0.000162509	ENSG00000137193_PIM1,0	ENSG00000137193_PIM1,0
chr2:239400834-239401699	0.0550263	0.000126863	0.000165121	ENSG00000222020_HDAC4-AS1,0;ENSG00000068024_HDAC4,0	ENSG00000068024_HDAC4,0;ENSG00000222020_HDAC4-AS1,0
chr1:53945572-53946452	0.0549716	0.000128843	0.000167459	ENSG00000081870_HSPB11,0;ENSG00000116212_LRRC42,0	ENSG00000081870_HSPB11,0;ENSG00000116212_LRRC42,0
chr4:37686115-37687030	0.0548864	0.000131992	0.000171309	ENSG00000181826_RELL1,0	ENSG00000181826_RELL1,0
chr19:14117541-14118437	0.0546162	0.000142453	0.000184624	ENSG00000267783_AC022098.3,-669;ENSG00000072062_PRKACA,0	ENSG00000072062_PRKACA,0
chr2:30146317-30147241	0.0545885	0.000143572	0.00018581	ENSG00000119801_YPEL5,0	ENSG00000119801_YPEL5,0
chr9:127980633-127981516	0.0545217	0.000146297	0.00018907	ENSG00000167106_FAM102A,0	ENSG00000167106_FAM102A,0
chr7:2631358-2632267	0.0545065	0.000146921	0.000189609	ENSG00000136295_TTYH3,0	ENSG00000136295_TTYH3,0
chr19:47514818-47515754	0.0544892	0.000147639	0.000190268	ENSG00000105402_NAPA,0	ENSG00000105402_NAPA,0
chr1:235504150-235505037	0.0544759	0.000148189	0.000190707	ENSG00000162885_B3GALNT2,0	ENSG00000162885_B3GALNT2,0
chr3:130111337-130112173	0.0544022	0.000151291	0.000194426	ENSG00000249846_LINC02021,0	ENSG00000249846_LINC02021,0;ENSG00000251287_ALG1L2,29506
chr1:246931593-246932452	0.0543078	0.00015535	0.000199357	ENSG00000153207_AHCTF1,0	ENSG00000153207_AHCTF1,0
chr12:82358178-82359116	0.0543029	0.000155564	0.000199357	ENSG00000127720_METTL25,0;ENSG00000133773_CCDC59,0	ENSG00000133773_CCDC59,0;ENSG00000127720_METTL25,0
chr8:124474349-124475252	0.0541931	0.00016042	0.000205293	ENSG00000245149_RNF139-AS1,0;ENSG00000170881_RNF139,0	ENSG00000245149_RNF139-AS1,0;ENSG00000170881_RNF139,0
chr1:244047857-244048855	0.0541737	0.000161295	0.000206124	ENSG00000179456_ZBTB18,-84
chr12:6533889-6534669	0.0541149	0.000163965	0.000209244	ENSG00000255966_AC006064.3,-391;ENSG00000111640_GAPDH,0	ENSG00000111640_GAPDH,0
chr2:25041643-25042548	0.0540923	0.000165007	0.000210059	ENSG00000084710_EFR3B,0	ENSG00000084710_EFR3B,0
chr16:67561921-67562698	0.0540911	0.000165062	0.000210059	ENSG00000259804_AC027682.1,0;ENSG00000102974_CTCF,0;ENSG00000261386_AC027682.4,1260	ENSG00000259804_AC027682.1,0;ENSG00000102974_CTCF,0;ENSG00000261386_AC027682.4,1260
chr10:86755998-86756921	0.0539066	0.000173776	0.000220841	ENSG00000272631_AC067750.1,0;ENSG00000107779_BMPR1A,0	ENSG00000272631_AC067750.1,0;ENSG00000107779_BMPR1A,0
chr18:23586263-23587180	0.0538947	0.000174352	0.000221266	ENSG00000141458_NPC1,0	ENSG00000141458_NPC1,0
chr5:57173272-57174206	0.0538744	0.000175342	0.000222213	ENSG00000062194_GPBP1,0	ENSG00000062194_GPBP1,0
chr19:17469831-17470671	0.0538127	0.000178377	0.000225747	ENSG00000130304_SLC27A1,1062	ENSG00000130304_SLC27A1,1062
chr18:12947566-12948385	0.053804	0.000178805	0.000225976	ENSG00000085415_SEH1L,433	ENSG00000085415_SEH1L,433
chr7:36152532-36153455	0.0536832	0.000184904	0.000233362	ENSG00000122547_EEPD1,0	ENSG00000122547_EEPD1,0
chr20:45971754-45972621	0.0536192	0.000188215	0.000237213	ENSG00000198026_ZNF335,0	ENSG00000198026_ZNF335,0
chr19:1275230-1276183	0.0536	0.000189219	0.000238151	ENSG00000228300_FAM174C,0	ENSG00000228300_FAM174C,0
chr3:156673981-156674903	0.0534922	0.000194952	0.00024503	ENSG00000243926_TIPARP-AS1,0;ENSG00000163659_TIPARP,746	ENSG00000243926_TIPARP-AS1,0;ENSG00000163659_TIPARP,746
chr19:14006073-14006994	0.0533906	0.000200503	0.00025166	ENSG00000275091_AC022098.4,0;ENSG00000132005_RFX1,45	ENSG00000275091_AC022098.4,0;ENSG00000132005_RFX1,45
chr1:6602532-6603442	0.0533816	0.000200999	0.000251937		ENSG00000162413_KLHL21,11165
chr1:46132460-46133388	0.053338	0.000203431	0.000254636	ENSG00000227857_AL358075.2,-1143;ENSG00000117461_PIK3R3,0	ENSG00000117461_PIK3R3,0
chr1:36223878-36224781	0.0532958	0.00020581	0.000257263	ENSG00000054118_THRAP3,0	ENSG00000054118_THRAP3,0
chr16:2214573-2215483	0.0532694	0.000207312	0.000258787	ENSG00000184207_PGP,0	ENSG00000184207_PGP,0
chr2:11154837-11155772	0.0532616	0.000207761	0.000258994	ENSG00000162976_SLC66A3,0	ENSG00000162976_SLC66A3,0
chr3:49469771-49470640	0.0531664	0.000213278	0.000265509	ENSG00000173402_DAG1,1068	ENSG00000173402_DAG1,1068
chr7:98281045-98281969	0.0530901	0.000217798	0.000270768		ENSG00000164713_BRI3,28666
chr10:12129136-12130037	0.0530387	0.000220889	0.000274237	ENSG00000065665_SEC61A2,0	ENSG00000065665_SEC61A2,0
chr11:65918807-65919720	0.0529158	0.000228457	0.00028325	ENSG00000175573_C11orf68,0;ENSG00000175550_DRAP1,0	ENSG00000175573_C11orf68,0;ENSG00000175550_DRAP1,0
chr1:154974071-154974973	0.0527492	0.000239111	0.000296057	ENSG00000160691_SHC1,0;ENSG00000173207_CKS1B,0	ENSG00000160691_SHC1,0;ENSG00000173207_CKS1B,0
chr8:144901145-144902016	0.0525957	0.000249332	0.000308296	ENSG00000196150_ZNF250,152	ENSG00000196150_ZNF250,152
chr4:7042707-7043635	0.0520626	0.000288103	0.000355754	ENSG00000173013_CCDC96,0;ENSG00000173011_TADA2B,808	ENSG00000173013_CCDC96,0;ENSG00000173011_TADA2B,808;ENSG00000245748_AC097382.2,2596
chr8:70401932-70402833	0.0518909	0.00030175	0.000372105	ENSG00000140396_NCOA2,975	ENSG00000140396_NCOA2,975
chr22:40636359-40637289	0.0518645	0.000303897	0.000374247	ENSG00000196588_MRTFA,0	ENSG00000196588_MRTFA,0
chr14:26597852-26598752	0.0517951	0.000309622	0.000380785	ENSG00000258081_AL110292.1,-1003;ENSG00000139910_NOVA1,0;ENSG00000257842_LINC02588,0	ENSG00000139910_NOVA1,0;ENSG00000257842_LINC02588,0
chr12:57520187-57521100	0.0517529	0.000313146	0.000384602	ENSG00000285133_AC022506.1,0;ENSG00000166987_MBD6,0;ENSG00000175197_DDIT3,637	ENSG00000285133_AC022506.1,0;ENSG00000166987_MBD6,0;ENSG00000175197_DDIT3,637
chr1:16644254-16645174	0.0516209	0.000324436	0.000397934
chr16:70438793-70439714	0.0515387	0.000331652	0.00040624	ENSG00000157350_ST3GAL2,0	ENSG00000157350_ST3GAL2,0
chr2:676583-677455	0.0513532	0.000348496	0.000426302	ENSG00000233296_AC092159.2,0;ENSG00000151353_TMEM18,0	ENSG00000151353_TMEM18,0;ENSG00000233296_AC092159.2,0
chr11:64240919-64241775	0.0510986	0.000372913	0.000455561	ENSG00000173486_FKBP2,0;ENSG00000286264_AP001453.3,0	ENSG00000173486_FKBP2,0;ENSG00000286264_AP001453.3,0
chr2:238060426-238061356	0.0510856	0.000374199	0.000456523	ENSG00000132330_SCLY,0	ENSG00000132330_SCLY,0
chr5:81750863-81751718	0.0510255	0.000380218	0.000463248	ENSG00000145687_SSBP2,79	ENSG00000145687_SSBP2,79
chr1:25616169-25617071	0.0509909	0.000383716	0.000466889	ENSG00000117643_MAN1C1,-397
chr7:44082224-44083148	0.0509104	0.000391981	0.000476311	ENSG00000122678_POLM,0	ENSG00000122678_POLM,0
chr6:41072506-41073326	0.0509028	0.000392772	0.00047664	ENSG00000001167_NFYA,0	ENSG00000001167_NFYA,0;ENSG00000124596_OARD1,24461
chr19:1103639-1104426	0.0508505	0.000398243	0.000482639	ENSG00000167468_GPX4,0	ENSG00000167468_GPX4,0
chr7:73521947-73522809	0.0508212	0.00040134	0.000485748	ENSG00000009954_BAZ1B,0	ENSG00000009954_BAZ1B,0
chr9:137458932-137459845	0.0505669	0.000429162	0.000518736	ENSG00000165802_NSMF,0	ENSG00000165802_NSMF,0
chr8:56211106-56212021	0.0505479	0.000431309	0.000520643	ENSG00000181690_PLAG1,0;ENSG00000170791_CHCHD7,0	ENSG00000181690_PLAG1,0;ENSG00000170791_CHCHD7,0
chr14:100238260-100239147	0.0505225	0.000434198	0.000523441	ENSG00000100811_YY1,0;ENSG00000258982_AL133523.1,0	ENSG00000258982_AL133523.1,0;ENSG00000100811_YY1,0
chr17:76726228-76727142	0.050439	0.000443826	0.000534343	ENSG00000070495_JMJD6,0;ENSG00000181038_METTL23,0	ENSG00000070495_JMJD6,0;ENSG00000181038_METTL23,0
chr15:43791757-43792660	0.0503859	0.000450048	0.000541122		ENSG00000140264_SERF2,14670
chr20:32357818-32358649	0.0503474	0.000454617	0.000545898	ENSG00000171456_ASXL1,0	ENSG00000171456_ASXL1,0
chr11:506800-507590	0.0501029	0.000484627	0.000581171	ENSG00000023191_RNH1,0	ENSG00000023191_RNH1,0
chr1:45303372-45304250	0.049975	0.000501049	0.000600078	ENSG00000281912_LINC01144,0;ENSG00000162415_ZSWIM5,1959	ENSG00000281912_LINC01144,0;ENSG00000162415_ZSWIM5,1959
chr17:7014385-7015281	0.0498808	0.000513468	0.000614148	ENSG00000215067_ALOX12-AS1,-1855;ENSG00000258315_C17orf49,0;ENSG00000219200_RNASEK,1968	ENSG00000258315_C17orf49,0;ENSG00000219200_RNASEK,1968
chr14:64540087-64540988	0.0498587	0.00051642	0.000616872	ENSG00000259116_AL049869.3,0	ENSG00000259116_AL049869.3,0;ENSG00000126803_HSPA2,4182
chr7:129224422-129225313	0.0497279	0.000534245	0.000637332	ENSG00000158467_AHCYL2,0	ENSG00000158467_AHCYL2,0
chr6:43170756-43171686	0.0496306	0.000547884	0.000652753	ENSG00000112658_SRF,0	ENSG00000112658_SRF,0
chr1:27725401-27726294	0.049625	0.000548669	0.000652837	ENSG00000287244_AL020997.5,0;ENSG00000009780_FAM76A,0	ENSG00000287244_AL020997.5,0;ENSG00000009780_FAM76A,0
chr14:102086733-102087677	0.0495789	0.000555247	0.000659806		ENSG00000080824_HSP90AA1,52022
chr2:9003424-9004339	0.0495432	0.000560397	0.000665063	ENSG00000143797_MBOAT2,0	ENSG00000143797_MBOAT2,0
chr1:39408440-39409339	0.0495111	0.000565069	0.000669738		ENSG00000127603_MACF1,327124
chr19:48713828-48714755	0.0494287	0.000577196	0.000683227		ENSG00000176909_MAMSTR,4970
chr5:140564072-140564982	0.0493649	0.000586766	0.000693657	ENSG00000113108_APBB3,0;ENSG00000176087_SLC35A4,0	ENSG00000113108_APBB3,0;ENSG00000176087_SLC35A4,0
chr18:80033754-80034633	0.04934	0.000590533	0.00069721	ENSG00000141759_TXNL4A,0;ENSG00000267127_AC090360.1,0;ENSG00000101546_RBFA,0	ENSG00000141759_TXNL4A,0;ENSG00000267127_AC090360.1,0;ENSG00000101546_RBFA,0
chr17:81860395-81861322	0.0490741	0.000632259	0.000745512	ENSG00000185624_P4HB,0	ENSG00000185624_P4HB,0
chr9:34048714-34049652	0.0490528	0.000635726	0.000748635	ENSG00000137073_UBAP2,0	ENSG00000137073_UBAP2,0
chr13:31161699-31162644	0.048983	0.000647168	0.000760261	ENSG00000120694_HSPH1,0	ENSG00000120694_HSPH1,0
chr17:7239176-7240082	0.0489825	0.00064726	0.000760261	ENSG00000040633_PHF23,0	ENSG00000040633_PHF23,0;ENSG00000170296_GABARAP,2367
chr1:161389708-161390627	0.0488374	0.000671693	0.000787948
chr11:3797270-3798185	0.0487181	0.000692416	0.000811217	ENSG00000148985_PGAP2,0;ENSG00000110713_NUP98,0	ENSG00000110713_NUP98,0;ENSG00000148985_PGAP2,0
chr14:39432060-39432950	0.0485669	0.000719546	0.000841924	ENSG00000165355_FBXO33,0;ENSG00000258526_AL049828.1,0	ENSG00000165355_FBXO33,0;ENSG00000258526_AL049828.1,0
chr9:134067758-134068590	0.0485312	0.000726089	0.000848495	ENSG00000169925_BRD3,0	ENSG00000169925_BRD3,0
chr9:137605016-137605932	0.0483822	0.000754026	0.000880017	ENSG00000197070_ARRDC1,0	ENSG00000197070_ARRDC1,0
chr17:45316715-45317607	0.0483114	0.000767628	0.000893957	ENSG00000006062_MAP3K14,0	ENSG00000006062_MAP3K14,0
chr17:41688920-41689526	0.0483099	0.000767924	0.000893957	ENSG00000173812_EIF1,35	ENSG00000173812_EIF1,35
chr3:132722239-132723136	0.048143	0.000800935	0.000931201	ENSG00000113971_NPHP3,0;ENSG00000248724_NPHP3-AS1,489	ENSG00000113971_NPHP3,0;ENSG00000248724_NPHP3-AS1,489
chr3:115147149-115148050	0.0479959	0.00083113	0.000965081	ENSG00000181722_ZBTB20,0;ENSG00000242880_AC026341.1,0	ENSG00000181722_ZBTB20,0;ENSG00000242880_AC026341.1,0
chr19:15379330-15380180	0.0479411	0.000842647	0.000977214	ENSG00000105127_AKAP8,0;ENSG00000268189_AC005785.1,254	ENSG00000105127_AKAP8,0;ENSG00000268189_AC005785.1,254;ENSG00000011243_AKAP8L,38961
chr1:7783608-7784535	0.0478374	0.000864833	0.00100167	ENSG00000049246_PER3,0	ENSG00000049246_PER3,0
chr15:40440535-40441406	0.0474509	0.000952424	0.00110036	ENSG00000140320_BAHD1,814	ENSG00000140320_BAHD1,814
chr9:35731900-35732839	0.0474508	0.000952439	0.00110036	ENSG00000137076_TLN1,0;ENSG00000107175_CREB3,0	ENSG00000137076_TLN1,0;ENSG00000107175_CREB3,0
chr4:86593806-86594693	0.0473214	0.000983554	0.00113487	ENSG00000163629_PTPN13,0;ENSG00000109339_MAPK10,0	ENSG00000109339_MAPK10,0;ENSG00000163629_PTPN13,0
chr17:75855138-75856018	0.0471932	0.00101528	0.00117001	ENSG00000132471_WBP2,489	ENSG00000132471_WBP2,489
chr13:109786245-109787170	0.0471789	0.0010189	0.00117255	ENSG00000185950_IRS2,0;ENSG00000275741_AL162497.1,414	ENSG00000185950_IRS2,0;ENSG00000275741_AL162497.1,414
chr16:29805219-29806138	0.0471743	0.00102005	0.00117255	ENSG00000275857_AC009133.4,-229;ENSG00000103495_MAZ,0;ENSG00000259952_AC009133.2,1594	ENSG00000103495_MAZ,0;ENSG00000079616_KIF22,14500
chr17:21284111-21285033	0.0470977	0.00103957	0.00119348	ENSG00000034152_MAP2K3,0	ENSG00000034152_MAP2K3,0
chr17:81345801-81346686	0.0466815	0.0011517	0.00132055	ENSG00000287431_AC027601.6,0	ENSG00000287431_AC027601.6,0
chr15:90233630-90234492	0.046586	0.00117894	0.00135011	ENSG00000183208_GDPGP1,0;ENSG00000185043_CIB1,0	ENSG00000185043_CIB1,0;ENSG00000183208_GDPGP1,0
chr22:41381277-41382163	0.0465654	0.00118489	0.00135522		ENSG00000167074_TEF,13944
chr3:5187144-5188002	0.0465603	0.00118638	0.00135523	ENSG00000233912_AC026202.2,0;ENSG00000134109_EDEM1,0;ENSG00000268509_AC026202.3,296	ENSG00000233912_AC026202.2,0;ENSG00000134109_EDEM1,0;ENSG00000268509_AC026202.3,296
chr17:79796773-79797699	0.0463149	0.00125962	0.0014371		ENSG00000141570_CBX8,3984
chr15:75451552-75452419	0.0459282	0.0013835	0.00157647	ENSG00000276744_AC105137.2,1528	ENSG00000169375_SIN3A,3423
chr5:138337676-138338486	0.0454633	0.00154727	0.00176089	ENSG00000158402_CDC25C,0	ENSG00000158402_CDC25C,0;ENSG00000120709_FAM53C,5741
chr19:680171-681077	0.045209	0.00164425	0.00186893		ENSG00000070404_FSTL3,3779
chr7:876111-876932	0.0450486	0.00170826	0.00193927	ENSG00000239857_GET4,0	ENSG00000239857_GET4,0;ENSG00000164828_SUN1,59496
chr19:42242479-42243417	0.0449832	0.001735	0.0019672	ENSG00000105723_GSK3A,0	ENSG00000105723_GSK3A,0
chr11:67507945-67508849	0.0449469	0.00174999	0.00198174	ENSG00000110697_PITPNM1,-1682;ENSG00000167797_CDK2AP2,0	ENSG00000167797_CDK2AP2,0
chr9:34989089-34990007	0.0449208	0.0017609	0.00199162	ENSG00000281491_DNAJB5-DT,0;ENSG00000137094_DNAJB5,0	ENSG00000281491_DNAJB5-DT,0;ENSG00000137094_DNAJB5,0
chr20:23361575-23362487	0.0441666	0.002103	0.00237561	ENSG00000125812_GZF1,0	ENSG00000125812_GZF1,0
chr3:66500661-66501545	0.0441305	0.0021208	0.00239277	ENSG00000144749_LRIG1,0	ENSG00000144749_LRIG1,0
chr1:172532511-172533379	0.0439954	0.00218873	0.00246637	ENSG00000094975_SUCO,162	ENSG00000094975_SUCO,162
chr16:81006836-81007685	0.0438002	0.00229032	0.00257766	ENSG00000166451_CENPN,338	ENSG00000166451_CENPN,338;ENSG00000103121_CMC2,12585
chr20:62793905-62794781	0.0437482	0.0023181	0.00260572	ENSG00000101189_MRGBP,-1692
chr12:123972510-123973432	0.0437134	0.00233686	0.00262359	ENSG00000270095_AC068790.6,-796;ENSG00000119242_CCDC92,0;ENSG00000178882_RFLNA,0;ENSG00000179195_ZNF664,665	ENSG00000119242_CCDC92,0;ENSG00000178882_RFLNA,0;ENSG00000179195_ZNF664,665
chr4:183504186-183505128	0.0434791	0.00246692	0.00276621	ENSG00000232648_AC107214.1,0;ENSG00000168556_ING2,0	ENSG00000232648_AC107214.1,0;ENSG00000168556_ING2,0
chr1:244652542-244653454	0.0432814	0.00258173	0.00288995	ENSG00000121644_DESI2,0	ENSG00000121644_DESI2,0
chr1:147599466-147600379	0.0432783	0.00258359	0.00288995		ENSG00000116128_BCL9,57965
chr6:35259109-35260024	0.0422729	0.00324726	0.00362789	ENSG00000065029_ZNF76,200	ENSG00000065029_ZNF76,200
chr19:58475627-58476569	0.0422539	0.00326113	0.00363895	ENSG00000269106_AC012313.7,0;ENSG00000083838_ZNF446,1610	ENSG00000269106_AC012313.7,0;ENSG00000083838_ZNF446,1610
chr7:1459222-1460145	0.042148	0.0033397	0.00372208	ENSG00000164877_MICALL2,0;ENSG00000225981_AC102953.1,0	ENSG00000164877_MICALL2,0;ENSG00000225981_AC102953.1,0
chr19:9818883-9819793	0.0413235	0.00401288	0.0044669		ENSG00000127452_FBXL12,8023
chr10:97498228-97499156	0.0408669	0.00443657	0.00493252	ENSG00000155229_MMS19,0;ENSG00000165886_UBTD1,0	ENSG00000155229_MMS19,0;ENSG00000165886_UBTD1,0
chr6:24720771-24721672	0.0407495	0.00455181	0.0050545	ENSG00000112308_C6orf62,-773;ENSG00000224164_LINC02828,0	ENSG00000224164_LINC02828,0
chr17:37358857-37359743	0.0405923	0.00471042	0.00522428		ENSG00000278540_ACACA,47093
chr3:33440122-33441019	0.0401521	0.00518155	0.00573985	ENSG00000153560_UBP1,352	ENSG00000153560_UBP1,352
chr17:8156162-8157079	0.0399343	0.00543005	0.00600785	ENSG00000179094_PER1,0	ENSG00000179094_PER1,0
chr19:43668234-43669170	0.0397725	0.00562161	0.00621229	ENSG00000011422_PLAUR,1377	ENSG00000011422_PLAUR,1377
chr16:5097646-5098548	0.0396807	0.00573301	0.00632775	ENSG00000267070_AC026458.2,-191;ENSG00000118894_EEF2KMT,0	ENSG00000118894_EEF2KMT,0
chr18:47930636-47931420	0.0396326	0.00579212	0.00638528	ENSG00000175387_SMAD2,0	ENSG00000175387_SMAD2,0
chr9:136482917-136483738	0.0396139	0.00581528	0.00640311	ENSG00000196366_C9orf163,0;ENSG00000148396_SEC16A,21	ENSG00000196366_C9orf163,0;ENSG00000148396_SEC16A,21
chr2:200811249-200812124	0.039545	0.00590116	0.00648986	ENSG00000230408_AC007163.1,46;ENSG00000082153_BZW1,655	ENSG00000230408_AC007163.1,46;ENSG00000082153_BZW1,655
chr4:173334077-173334986	0.039193	0.0063586	0.00697755	ENSG00000164104_HMGB2,0	ENSG00000164104_HMGB2,0
chr11:575682-576619	0.039192	0.00635987	0.00697755	ENSG00000070047_PHRF1,0	ENSG00000070047_PHRF1,0
chr7:35037228-35038160	0.0389673	0.00666829	0.00730716	ENSG00000173852_DPY19L1,111;ENSG00000287249_AC005400.1,392	ENSG00000173852_DPY19L1,111;ENSG00000287249_AC005400.1,392
chr10:43408706-43409633	0.0387524	0.0069758	0.007635	ENSG00000169813_HNRNPF,0	ENSG00000169813_HNRNPF,0
chr20:49277879-49278822	0.0375403	0.00896079	0.00979585	ENSG00000177410_ZFAS1,0;ENSG00000124201_ZNFX1,0	ENSG00000124201_ZNFX1,0;ENSG00000177410_ZFAS1,0
chr8:143597143-143598043	0.0374881	0.00905653	0.00988869	ENSG00000179886_TIGD5,0;ENSG00000104529_EEF1D,1498	ENSG00000179886_TIGD5,0;ENSG00000104529_EEF1D,1498
chr3:43621665-43622575	0.0371619	0.00967634	0.0105529		ENSG00000160746_ANO10,69019
chr8:102238779-102239698	0.0369016	0.0101978	0.0111083	ENSG00000048392_RRM2B,0;ENSG00000246263_UBR5-AS1,0	ENSG00000048392_RRM2B,0;ENSG00000246263_UBR5-AS1,0
chr14:99683688-99684609	0.0368835	0.010235	0.0111356	ENSG00000036530_CYP46A1,0	ENSG00000036530_CYP46A1,0
chr20:53593947-53594859	0.0367935	0.0104215	0.011325		ENSG00000171940_ZNF217,15048
chr2:219387815-219388705	0.0367119	0.0105934	0.0114982	ENSG00000229525_AC053503.2,0	ENSG00000229525_AC053503.2,0;ENSG00000123992_DNPEP,11317
chr17:81034579-81035471	0.0366191	0.0107917	0.0116995	ENSG00000226137_BAIAP2-DT,0;ENSG00000175866_BAIAP2,0	ENSG00000226137_BAIAP2-DT,0;ENSG00000175866_BAIAP2,0
chr16:21520020-21520912	0.0363344	0.0114213	0.0123674
chr19:40444124-40445050	0.0358113	0.0126635	0.0136963	ENSG00000167565_SERTAD3,0;ENSG00000268366_AC010271.1,688	ENSG00000167565_SERTAD3,0
chr6:31827123-31827995	0.0353951	0.0137355	0.0148383	ENSG00000204388_HSPA1B,0	ENSG00000204388_HSPA1B,0
chr4:2535985-2536870	0.0353373	0.0138907	0.0149882	ENSG00000125386_FAM193A,0	ENSG00000125386_FAM193A,0;ENSG00000063978_RNF4,73765
chr5:34929083-34929926	0.0352726	0.014066	0.0151595	ENSG00000168724_DNAJC21,0	ENSG00000168724_DNAJC21,0
chr3:52409939-52410798	0.0352131	0.0142292	0.0153173	ENSG00000163930_BAP1,0;ENSG00000010318_PHF7,0	ENSG00000163930_BAP1,0;ENSG00000010318_PHF7,0
chr3:50321002-50321910	0.0349786	0.0148881	0.0160078	ENSG00000068001_HYAL2,872	ENSG00000068001_HYAL2,872;ENSG00000114383_TUSC2,6341
chr16:46883775-46884687	0.0349594	0.0149433	0.0160483	ENSG00000166123_GPT2,0	ENSG00000166123_GPT2,0
chr12:6752969-6753902	0.0348396	0.0152912	0.0163971		ENSG00000089693_MLF2,13573
chr11:95230887-95231764	0.0348353	0.0153039	0.0163971	ENSG00000149212_SESN3,777	ENSG00000149212_SESN3,777;ENSG00000245552_AP000787.1,80348
chr8:73293743-73294663	0.0346865	0.0157464	0.0168515	ENSG00000121039_RDH10,0;ENSG00000147604_RPL7,1126	ENSG00000121039_RDH10,0;ENSG00000147604_RPL7,1126
chr11:111926664-111927576	0.0346049	0.0159939	0.0170963	ENSG00000150764_DIXDC1,0	ENSG00000150764_DIXDC1,0;ENSG00000149300_C11orf52,8632
chr4:148442115-148442996	0.0345407	0.0161906	0.0172864	ENSG00000151623_NR3C2,1702	ENSG00000151623_NR3C2,1702
chr2:54723065-54723975	0.0343916	0.0166566	0.0177632	ENSG00000214595_EML6,0	ENSG00000214595_EML6,0
chr17:58517636-58518476	0.0341027	0.0175929	0.0187328	ENSG00000264672_SEPTIN4-AS1,-1361;ENSG00000108389_MTMR4,0	ENSG00000108389_MTMR4,0
chr15:52018988-52019875	0.0340985	0.0176068	0.0187328	ENSG00000274528_AC090970.2,-956;ENSG00000259438_MAPK6-DT,0	ENSG00000259438_MAPK6-DT,0;ENSG00000069956_MAPK6,66882
chr3:75434989-75435878	0.0337428	0.0188234	0.0200039	ENSG00000272690_LINC02018,0	ENSG00000272690_LINC02018,0
chr1:65419976-65420912	0.0335547	0.0194961	0.0206948	ENSG00000213625_LEPROT,0;ENSG00000116678_LEPR,0	ENSG00000213625_LEPROT,0;ENSG00000116678_LEPR,0
chr17:46193541-46194194	0.0328713	0.0221197	0.0234525	ENSG00000214401_KANSL1-AS1,0	ENSG00000214401_KANSL1-AS1,0;ENSG00000120071_KANSL1,31195
chr17:81512467-81513365	0.0325773	0.0233396	0.0247173	ENSG00000229848_AC139149.1,-682	ENSG00000184009_ACTG1,10482
chr4:101347254-101348127	0.0320876	0.0255015	0.0269756	ENSG00000254531_AP001816.1,0;ENSG00000138814_PPP3CA,151	ENSG00000254531_AP001816.1,0;ENSG00000138814_PPP3CA,151
chr7:30284148-30285016	0.0314813	0.028416	0.0300238	ENSG00000180233_ZNRF2,0	ENSG00000180233_ZNRF2,0
chr2:197499633-197500529	0.0313057	0.0293124	0.0309352	ENSG00000115541_HSPE1,0	ENSG00000115541_HSPE1,0;ENSG00000144381_HSPD1,16208
chr3:125915810-125916727	0.0306259	0.0330136	0.0348012	ENSG00000248787_AC092903.2,0;ENSG00000241288_LINC02614,0	ENSG00000241288_LINC02614,0;ENSG00000248787_AC092903.2,0
chr18:62522548-62523477	0.030483	0.0338407	0.0356321	ENSG00000141664_ZCCHC2,0	ENSG00000141664_ZCCHC2,0
chr18:74495808-74496674	0.0303614	0.0345585	0.036346	ENSG00000133313_CNDP2,0	ENSG00000133313_CNDP2,0
chr19:35717255-35718119	0.0297858	0.038134	0.0400604	ENSG00000272333_KMT2B,0	ENSG00000272333_KMT2B,0
chr22:28882966-28883874	0.0282691	0.0490923	0.0515132	ENSG00000183579_ZNRF3,0	ENSG00000183579_ZNRF3,0
chr10:102713982-102714857	0.0269286	0.0608693	0.0637977	ENSG00000138175_ARL3,0;ENSG00000156398_SFXN2,0	ENSG00000138175_ARL3,0;ENSG00000156398_SFXN2,0
chr19:47274128-47275085	0.0268931	0.0612107	0.0640822	ENSG00000257704_INAFM1,0	ENSG00000257704_INAFM1,0
chr6:151389967-151390900	0.0268297	0.0618242	0.0646504	ENSG00000181472_ZBTB2,659	ENSG00000181472_ZBTB2,659
chr9:134024864-134025765	0.026363	0.0664968	0.0694573	ENSG00000235106_BRD3OS,0	ENSG00000235106_BRD3OS,0
chr11:67805240-67806117	0.0262465	0.067708	0.0706418
chr1:16613099-16613992	0.0258042	0.0724703	0.0755243	ENSG00000219481_NBPF1,0	ENSG00000219481_NBPF1,0
chr10:110007394-110008320	0.0255178	0.0756987	0.078799	ENSG00000203876_ADD3-AS1,61	ENSG00000203876_ADD3-AS1,61;ENSG00000148700_ADD3,11026
chr1:18956332-18957244	0.0251031	0.0805797	0.0837846	ENSG00000169991_IFFO2,0	ENSG00000169991_IFFO2,0
chr2:219543443-219544310	0.0244458	0.0888368	0.0922652	ENSG00000188760_TMEM198,0;ENSG00000123989_CHPF,0	ENSG00000123989_CHPF,0;ENSG00000188760_TMEM198,0
chr4:38663458-38664372	0.0241746	0.0924361	0.0958946	ENSG00000109787_KLF3,0;ENSG00000231160_KLF3-AS1,542	ENSG00000109787_KLF3,0;ENSG00000231160_KLF3-AS1,542
chr2:24971457-24972372	0.0231298	0.107411	0.111304	ENSG00000115137_DNAJC27,0;ENSG00000224165_DNAJC27-AS1,67	ENSG00000115137_DNAJC27,0;ENSG00000224165_DNAJC27-AS1,67
chr9:93095541-93096429	0.0228795	0.111269	0.115088	ENSG00000223446_AL451065.1,0;ENSG00000165233_CARD19,0	ENSG00000223446_AL451065.1,0;ENSG00000165233_CARD19,0
chr19:7920252-7921152	0.0228766	0.111314	0.115088	ENSG00000260500_AC010336.2,-1095;ENSG00000104976_SNAPC2,0	ENSG00000104976_SNAPC2,0
chr2:175167936-175168789	0.0225428	0.116631	0.120449	ENSG00000115966_ATF2,0;ENSG00000229750_AC096649.1,32	ENSG00000115966_ATF2,0;ENSG00000229750_AC096649.1,32
chr19:1863465-1864385	-0.0225024	0.117288	0.120991	ENSG00000129911_KLF16,0	ENSG00000129911_KLF16,0
chr8:79767579-79768448	0.022443	0.118258	0.121854	ENSG00000164683_HEY1,0;ENSG00000272138_LINC01607,0	ENSG00000164683_HEY1,0;ENSG00000272138_LINC01607,0
chr12:8242870-8243793	0.0216767	0.131357	0.135199	ENSG00000286895_AC092745.5,0	ENSG00000286895_AC092745.5,0
chr6:109094518-109095387	0.0215812	0.133064	0.136802	ENSG00000080546_SESN1,0;ENSG00000183137_CEP57L1,0	ENSG00000080546_SESN1,0;ENSG00000183137_CEP57L1,0
chr5:56909399-56910258	0.021491	0.134694	0.138322	ENSG00000155542_SETD9,139;ENSG00000225230_AC008937.1,456	ENSG00000155542_SETD9,139;ENSG00000225230_AC008937.1,456
chr16:89873713-89874528	0.021399	0.136372	0.139888	ENSG00000141002_TCF25,143	ENSG00000141002_TCF25,143
chr1:94926767-94927684	0.0213439	0.137384	0.140769	ENSG00000117519_CNN3,0;ENSG00000235501_AC105942.1,0	ENSG00000117519_CNN3,0;ENSG00000235501_AC105942.1,0
chr10:79445344-79446236	0.0213096	0.138018	0.14126	ENSG00000165424_ZCCHC24,0	ENSG00000165424_ZCCHC24,0
chr2:97995587-97996481	0.0211329	0.141315	0.144473	ENSG00000075568_TMEM131,0	ENSG00000075568_TMEM131,0
chr6:33410085-33410952	0.0209229	0.145311	0.148392	ENSG00000112511_PHF1,0	ENSG00000112511_PHF1,0
chr19:49639913-49640844	0.0202684	0.158324	0.161501	ENSG00000126461_SCAF1,-1365;ENSG00000126458_RRAS,0	ENSG00000126458_RRAS,0
chr11:64778397-64779331	0.0199178	0.165648	0.168784	ENSG00000168066_SF1,0;ENSG00000269038_AP001462.1,0	ENSG00000168066_SF1,0;ENSG00000269038_AP001462.1,0
chr1:6613077-6613942	0.0197401	0.169457	0.172473	ENSG00000116273_PHF13,0;ENSG00000162413_KLHL21,665	ENSG00000116273_PHF13,0;ENSG00000162413_KLHL21,665
chr14:99603926-99604832	0.0180079	0.210072	0.213574	ENSG00000205476_CCDC85C,0;ENSG00000247970_AL160313.1,0	ENSG00000205476_CCDC85C,0;ENSG00000247970_AL160313.1,0
chr6:12011104-12012042	0.0164331	0.252731	0.256658		ENSG00000095951_HIVEP1,2342
chr9:96418242-96419067	0.0156607	0.275724	0.279698	ENSG00000286835_AL133477.2,-865;ENSG00000165244_ZNF367,0	ENSG00000165244_ZNF367,0
chr2:214809461-214810354	-0.014387	0.316674	0.320882	ENSG00000138376_BARD1,0;ENSG00000229267_SNHG31,0	ENSG00000138376_BARD1,0;ENSG00000229267_SNHG31,0
chr10:6202498-6203309	0.0135312	0.346319	0.350533	ENSG00000213994_AL157395.1,0	ENSG00000213994_AL157395.1,0;ENSG00000170525_PFKFB3,57564
chr11:67629846-67630748	0.0132046	0.358085	0.362042	ENSG00000167799_NUDT8,0	ENSG00000167799_NUDT8,0
chr1:24744805-24745694	-0.0122566	0.393639	0.397549	ENSG00000169504_CLIC4,0	ENSG00000169504_CLIC4,0
chr20:46406148-46407048	0.0117969	0.411627	0.415258		ENSG00000062598_ELMO2,25937
chr1:201888153-201889083	0.0108965	0.448232	0.451688	ENSG00000198892_SHISA4,0	ENSG00000198892_SHISA4,0
chr3:188051944-188052813	0.00967512	0.500719	0.504024
chr6:125749062-125749964	-0.00938868	0.513484	0.516306	ENSG00000237742_AL365259.1,0;ENSG00000135547_HEY2,1398	ENSG00000237742_AL365259.1,0;ENSG00000135547_HEY2,1398
chr19:47256640-47257451	-0.0077777	0.588301	0.590884	ENSG00000286669_AC008532.1,-163;ENSG00000105321_CCDC9,660	ENSG00000105321_CCDC9,660
chr10:100999161-101000025	0.00675539	0.638249	0.640348		ENSG00000107816_LZTS2,2543
chr8:123274222-123275119	0.00626514	0.662816	0.664268	ENSG00000165156_ZHX1,422	ENSG00000165156_ZHX1,422
chr11:44564968-44565860	0.00595668	0.678464	0.679206	ENSG00000085117_CD82,541	ENSG00000085117_CD82,541
chr4:3292453-3293385	-0.00376148	0.79349	0.79349	ENSG00000159788_RGS12,0	ENSG00000159788_RGS12,0

## Sheet: CytoTrace_NCI_cluster_summary
Cluster	median	IQR	NCells
Immature	0.901961	0.0990712	939
Neural Stem	0.373581	0.373581	3623
Neuroblast	0.770898	0.0443756	284

## Sheet: CytoTrace_NCI_cluster_stats
Cluster1	Cluster2	PValue	QValue
Neural Stem	Neuroblast	3.32256e-160	4.98384e-160
Neural Stem	Immature	0	0
Neuroblast	Immature	8.81305e-127	8.81305e-127
