# Supplementary material for: A roadmap to human hippocampal neurogenesis in adulthood, aging and AD.
Source: Research Square preprint supplement (doi:10.21203/rs.3.rs-4469965/v1), 2024-05-30
Supplement: Supplementary file 12 [file ca30cd922321a9c0e4eaa9d5.xlsx]

## Sheet: README
CODE	Acronym in manuscript
HA	NCI
YC	YA
MCI	MCI
AD	AD

## Sheet: pseudobulk-RNA_signif_GOBP
Contrast	Cluster	Direction	Pathway ID	Pathway Name	Pathway Description	Log2 Fold Enrichment	p-value	q-value	Genes in intersection
1.YC/0.HA	GABA_neurons	Up	GO BP	GOBP_OLIGODENDROCYTE_DIFFERENTIATION	GOBP_OLIGODENDROCYTE_DIFFERENTIATION	4.65827	5.23918e-10	2.85273e-06	PTN,ZNF365,GPR17,ASPA,FA2H,PTPRZ1,MOBP,ZNF488,OPALIN
1.YC/0.HA	GABA_neurons	Up	GO BP	GOBP_GLIOGENESIS	GOBP_GLIOGENESIS	3.45844	6.8944e-09	1.877e-05	ETV5,PTN,ZNF365,CSF1R,GPR17,ASPA,FA2H,PTPRZ1,SH3TC2,MOBP,ZNF488,OPALIN
1.YC/0.HA	GABA_neurons	Up	GO BP	GOBP_GLIAL_CELL_DIFFERENTIATION	GOBP_GLIAL_CELL_DIFFERENTIATION	3.58344	5.05593e-08	7.10432e-05	PTN,ZNF365,GPR17,ASPA,FA2H,PTPRZ1,SH3TC2,MOBP,ZNF488,OPALIN
1.YC/0.HA	GABA_neurons	Up	GO BP	GOBP_NEUROGENESIS	GOBP_NEUROGENESIS	2.12885	5.21897e-08	7.10432e-05	ETV5,PTN,ZNF365,SCRT2,CSF1R,EPHB1,SYT2,SCN1B,UGT8,SLITRK2,NTN1,MAN2A1,NKD1,GPR17,CBLN1,ASPA,FA2H,PTPRZ1,ENC1,MBOAT1,SH3TC2,MOBP,ZNF488,C21ORF91,OPALIN
1.YC/0.HA	GABA_neurons	Up	GO BP	GOBP_ENSHEATHMENT_OF_NEURONS	GOBP_ENSHEATHMENT_OF_NEURONS	3.97117	1.44486e-07	0.000157345	PTN,UGT8,ASPA,FA2H,PTPRZ1,SH3TC2,MOBP,BCAS1
1.YC/0.HA	GABA_neurons	Up	GO BP	GOBP_POSITIVE_REGULATION_OF_NERVOUS_SYSTEM_DEVELOPMENT	GOBP_POSITIVE_REGULATION_OF_NERVOUS_SYSTEM_DEVELOPMENT	3.2333	4.26496e-07	0.000387046	ETV5,PTN,ZNF365,EPHB1,SLITRK2,NTN1,MAN2A1,CBLN1,ASPA,PTPRZ1
1.YC/0.HA	GABA_neurons	Up	GO BP	GOBP_CENTRAL_NERVOUS_SYSTEM_DEVELOPMENT	GOBP_CENTRAL_NERVOUS_SYSTEM_DEVELOPMENT	2.26072	5.4902e-07	0.000427059	PTN,ZNF365,MEIS2,CSF1R,EPHB1,SCN1B,UGT8,SCTR,GPR17,CBLN1,ASPA,FA2H,PTPRZ1,SHROOM4,MOBP,ZNF488,C21ORF91,OPALIN
1.YC/0.HA	GABA_neurons	Up	GO BP	GOBP_REGULATION_OF_OLIGODENDROCYTE_DIFFERENTIATION	GOBP_REGULATION_OF_OLIGODENDROCYTE_DIFFERENTIATION	5.10989	8.57446e-07	0.000583599	PTN,ZNF365,ASPA,PTPRZ1,OPALIN
1.YC/0.HA	GABA_neurons	Up	GO BP	GOBP_POSITIVE_REGULATION_OF_OLIGODENDROCYTE_DIFFERENTIATION	GOBP_POSITIVE_REGULATION_OF_OLIGODENDROCYTE_DIFFERENTIATION	5.59714	3.33985e-06	0.00202061	PTN,ZNF365,ASPA,PTPRZ1
1.YC/0.HA	GABA_neurons	Up	GO BP	GOBP_POSITIVE_REGULATION_OF_GLIOGENESIS	GOBP_POSITIVE_REGULATION_OF_GLIOGENESIS	4.3532	9.07054e-06	0.00493891	ETV5,PTN,ZNF365,ASPA,PTPRZ1
1.YC/0.HA	GABA_neurons	Up	GO BP	GOBP_POSTSYNAPSE_ORGANIZATION	GOBP_POSTSYNAPSE_ORGANIZATION	3.37793	1.09832e-05	0.00543668	PTN,ZNF365,EPHB1,HSPA8,ABHD17B,CBLN1,TANC1
1.YC/0.HA	GABA_neurons	Up	GO BP	GOBP_REGULATION_OF_GLIAL_CELL_DIFFERENTIATION	GOBP_REGULATION_OF_GLIAL_CELL_DIFFERENTIATION	4.20162	1.46336e-05	0.00664	PTN,ZNF365,ASPA,PTPRZ1,OPALIN
1.YC/0.HA	GABA_neurons	Up	GO BP	GOBP_SYNAPSE_ORGANIZATION	GOBP_SYNAPSE_ORGANIZATION	2.53992	2.4683e-05	0.0103384	PTN,ZNF365,EPHB1,HSPA8,SLITRK2,NTN1,ABHD17B,CBLN1,TANC1,IGSF21
1.YC/0.HA	GABA_neurons	Up	GO BP	GOBP_REGULATION_OF_NERVOUS_SYSTEM_DEVELOPMENT	GOBP_REGULATION_OF_NERVOUS_SYSTEM_DEVELOPMENT	2.52517	2.68202e-05	0.0104311	ETV5,PTN,ZNF365,EPHB1,SLITRK2,NTN1,MAN2A1,CBLN1,ASPA,PTPRZ1
1.YC/0.HA	GABA_neurons	Up	GO BP	GOBP_POSITIVE_REGULATION_OF_GLIAL_CELL_DIFFERENTIATION	GOBP_POSITIVE_REGULATION_OF_GLIAL_CELL_DIFFERENTIATION	4.55842	4.31517e-05	0.0156641	PTN,ZNF365,ASPA,PTPRZ1
1.YC/0.HA	GABA_neurons	Up	GO BP	GOBP_OLIGODENDROCYTE_DEVELOPMENT	GOBP_OLIGODENDROCYTE_DEVELOPMENT	4.52004	4.75211e-05	0.016172	ASPA,FA2H,MOBP,ZNF488
1.YC/0.HA	GABA_neurons	Up	GO BP	GOBP_REGULATION_OF_GLIOGENESIS	GOBP_REGULATION_OF_GLIOGENESIS	3.76759	5.70495e-05	0.0182726	ETV5,PTN,ZNF365,ASPA,PTPRZ1
1.YC/0.HA	GABA_neurons	Up	GO BP	GOBP_REGULATION_OF_SYNAPSE_STRUCTURE_OR_ACTIVITY	GOBP_REGULATION_OF_SYNAPSE_STRUCTURE_OR_ACTIVITY	2.94201	6.95104e-05	0.0205186	PTN,EPHB1,HSPA8,SLITRK2,NTN1,ABHD17B,CBLN1
1.YC/0.HA	GABA_neurons	Up	GO BP	GOBP_POSITIVE_REGULATION_OF_NEUROGENESIS	GOBP_POSITIVE_REGULATION_OF_NEUROGENESIS	2.93491	7.15984e-05	0.0205186	ETV5,PTN,ZNF365,NTN1,MAN2A1,ASPA,PTPRZ1
1.YC/0.HA	GABA_neurons	Up	GO BP	GOBP_CELL_JUNCTION_ORGANIZATION	GOBP_CELL_JUNCTION_ORGANIZATION	2.04865	0.000106438	0.0289776	PTN,ZNF365,CSF1R,EPHB1,HSPA8,UGT8,SLITRK2,NTN1,ABHD17B,CBLN1,TANC1,IGSF21
1.YC/0.HA	GABA_neurons	Up	GO BP	GOBP_AXON_ENSHEATHMENT_IN_CENTRAL_NERVOUS_SYSTEM	GOBP_AXON_ENSHEATHMENT_IN_CENTRAL_NERVOUS_SYSTEM	5.24786	0.000113703	0.0294815	ASPA,FA2H,MOBP
1.YC/0.HA	GABA_neurons	Up	GO BP	GOBP_GLIAL_CELL_DEVELOPMENT	GOBP_GLIAL_CELL_DEVELOPMENT	3.41915	0.000168227	0.0416361	ASPA,FA2H,SH3TC2,MOBP,ZNF488
1.YC/0.HA	GABA_neurons	Up	GO BP	GOBP_CELLULAR_COMPONENT_MAINTENANCE	GOBP_CELLULAR_COMPONENT_MAINTENANCE	3.93485	0.000206804	0.0489585	CSF1R,ABHD17B,CBLN1,TANC1
1.YC/0.HA	GABA_neurons	Up	GO BP	GOBP_POSITIVE_REGULATION_OF_CELL_DEVELOPMENT	GOBP_POSITIVE_REGULATION_OF_CELL_DEVELOPMENT	2.49084	0.00043748	0.0992534	ETV5,PTN,ZNF365,NTN1,MAN2A1,ASPA,PTPRZ1
1.YC/0.HA	GABA_neurons	Up	GO BP	GOBP_NEURON_PROJECTION_ORGANIZATION	GOBP_NEURON_PROJECTION_ORGANIZATION	3.33911	0.000911736	0.198576	ZNF365,EPHB1,ABHD17B,TANC1
1.YC/0.HA	GABA_neurons	Up	GO BP	GOBP_NEGATIVE_REGULATION_OF_SYNAPSE_ORGANIZATION	GOBP_NEGATIVE_REGULATION_OF_SYNAPSE_ORGANIZATION	5.73094	0.000994357	0.208241	PTN,CBLN1
1.YC/0.HA	GABA_neurons	Up	GO BP	GOBP_REGULATION_OF_SYNAPSE_ASSEMBLY	GOBP_REGULATION_OF_SYNAPSE_ASSEMBLY	3.27328	0.00107251	0.21629	EPHB1,SLITRK2,NTN1,CBLN1
1.YC/0.HA	GABA_neurons	Up	GO BP	GOBP_REGULATION_OF_NEUROGENESIS	GOBP_REGULATION_OF_NEUROGENESIS	2.23089	0.00120928	0.228342	ETV5,PTN,ZNF365,NTN1,MAN2A1,ASPA,PTPRZ1
1.YC/0.HA	GABA_neurons	Up	GO BP	GOBP_GLIAL_CELL_PROLIFERATION	GOBP_GLIAL_CELL_PROLIFERATION	3.97737	0.00121614	0.228342	ETV5,PTN,CSF1R
1.YC/0.HA	GABA_neurons	Up	GO BP	GOBP_CELL_PROJECTION_ORGANIZATION	GOBP_CELL_PROJECTION_ORGANIZATION	1.42155	0.00127191	0.230852	PTN,ZNF365,TTYH1,CSF1R,EPHB1,SSX2IP,SYT2,SCN1B,UGT8,SLITRK2,NTN1,PLD1,ABHD17B,ENC1,MBOAT1,TANC1,C21ORF91
3.AD/0.HA	GABA_neurons	Up	GO BP	GOBP_NEUROGENESIS	GOBP_NEUROGENESIS	1.16549	9.36904e-13	5.10144e-09	DNM2,DNMT3A,FGFR2,SUN2,CECR2,NOTCH2,PPARG,CHD7,PTCH1,PTN,SPTBN4,FZD5,JAM3,CD38,ZNF365,CDK5RAP2,RB1,TAOK3,CUX1,ZHX2,SPEN,MYT1L,HIPK2,ZFHX3,NEDD4,PAX6,PSEN1,SOX10,NR2E1,RUNX1,ZNF536,DUSP10,CSF1R,LPAR1,ERBB3,TNIK,ALK,ABL1,NCAM1,MINK1,ROBO1,MAP4K4,CNP,DISC1,BMERB1,CDH4,ARMCX5-GPRASP2,PDLIM5,IL1RAPL1,DSCAM,ALCAM,PHACTR1,PALLD,KANK1,KIF13B,GAB1,AUTS2,FRYL,LAMA3,LRP4,MAG,MYO7A,PLXNA2,POU3F2,DSCAML1,PREX…
3.AD/0.HA	GABA_neurons	Up	GO BP	GOBP_CELL_MORPHOGENESIS	GOBP_CELL_MORPHOGENESIS	1.23109	3.13511e-10	8.53534e-07	MERTK,DNM2,FGFR2,NOTCH2,PTCH1,PTN,SPTBN4,ZNF365,RB1,TAOK3,CUX1,NEDD4,PSEN1,NR2E1,CSF1R,LPAR1,TNIK,ABL1,NCAM1,MINK1,ROBO1,MAP4K4,CNP,DISC1,CDH4,CDH7,ARMCX5-GPRASP2,CDH8,WASF2,DLC1,PDLIM5,IL1RAPL1,PACSIN2,FMNL2,FGD4,SYNE3,DOCK1,DSCAM,MEGF9,ALCAM,PHACTR1,PALLD,SIPA1L3,KANK1,KIF13B,GAB1,AUTS2,GREM1,CDH20,CDH19,FRYL,LAMA3,LRP4,MAG,MYO7A,ENPP2,PLXNA2,POU3F2,ARHGAP15,ATP10A,DSCAML1,ERMN,PREX1,DIP2B,ZSWI…
3.AD/0.HA	GABA_neurons	Up	GO BP	GOBP_NEURON_DIFFERENTIATION	GOBP_NEURON_DIFFERENTIATION	1.07974	9.39698e-10	1.70555e-06	DNM2,DNMT3A,FGFR2,CECR2,NOTCH2,PTCH1,PTN,SPTBN4,FZD5,JAM3,CD38,ZNF365,CDK5RAP2,RB1,TAOK3,CUX1,ZHX2,MYT1L,HIPK2,ZFHX3,NEDD4,PAX6,PSEN1,NR2E1,RUNX1,ZNF536,CSF1R,LPAR1,TNIK,ALK,ABL1,NCAM1,MINK1,ROBO1,MAP4K4,CNP,DISC1,CDH4,ARMCX5-GPRASP2,PDLIM5,IL1RAPL1,DSCAM,ALCAM,PHACTR1,PALLD,KANK1,KIF13B,GAB1,AUTS2,FRYL,LAMA3,LRP4,MAG,MYO7A,PLXNA2,POU3F2,DSCAML1,PREX1,DIP2B,ZSWIM6,LRRC4C,ADGRB3,CACNG7,SGK1,CNTN2,…
3.AD/0.HA	GABA_neurons	Up	GO BP	GOBP_OLIGODENDROCYTE_DIFFERENTIATION	GOBP_OLIGODENDROCYTE_DIFFERENTIATION	2.72265	1.96012e-09	2.33518e-06	PPARG,PTN,ZNF365,SOX10,DUSP10,LPAR1,CNP,MAG,PLP1,NKX2-2,GSN,TMEM98,SLC8A3,ASPA,FA2H,MYRF,DAAM2,MOBP,OPALIN
3.AD/0.HA	GABA_neurons	Up	GO BP	GOBP_CELL_JUNCTION_ORGANIZATION	GOBP_CELL_JUNCTION_ORGANIZATION	1.34057	2.18648e-09	2.33518e-06	ITGA2,SHISA6,PTN,FZD5,JAM3,ZNF365,CTBP2,NEDD4,PSEN1,RUNX1,NR1H4,CSF1R,ABL1,GRIN2B,IKBKB,PTPRJ,MAP4K4,DISC1,CDH4,CDH7,ARMCX5-GPRASP2,CDH8,WASF2,DLC1,PDLIM5,IL1RAPL1,DSCAM,GREM1,CDH20,CDH19,LAMA3,LRP4,LRRC4C,ADGRB3,CNTN2,UGT8,SRCIN1,GPM6B,UNC13C,CACNB2,NFIA,NDRG1,MARVELD2,TJP1,LIMCH1,SLC8A3,ARHGAP6,ABHD17B,MTMR2,CACNG2,ELFN1,LRRTM3,CDH1,TANC1,PLEC,IGSF21,COL4A5,LRFN2,CTTNBP2,ZNF804A,CADM2
3.AD/0.HA	GABA_neurons	Up	GO BP	GOBP_ENSHEATHMENT_OF_NEURONS	GOBP_ENSHEATHMENT_OF_NEURONS	2.44173	2.5732e-09	2.33518e-06	PTN,JAM3,QKI,SOX10,LPAR1,MBP,MAG,POU3F2,UGT8,PLP1,NDRG1,TMEM98,SLC8A3,MTMR2,ASPA,FA2H,MYRF,SH3TC2,MAL,MOBP,PLLP,BCAS1
3.AD/0.HA	GABA_neurons	Up	GO BP	GOBP_ACTIN_FILAMENT_BASED_PROCESS	GOBP_ACTIN_FILAMENT_BASED_PROCESS	1.27545	4.4169e-09	3.43572e-06	SUN2,NOTCH2,SPTBN4,JAM3,TF,RGCC,CSF1R,LPAR1,TNIK,ABL1,IKBKB,MINK1,SERPINF2,INF2,ANLN,WASF2,DLC1,PDLIM5,PACSIN2,FMNL2,FGD4,PHACTR1,PALLD,KANK1,GAB1,AUTS2,MYO7A,ERMN,PREX1,SEMA5A,FMNL3,SCIN,GPM6B,CACNB2,BIN1,CTNNA3,KCNJ3,CACNA1C,CACNA1D,CAMK2D,MYO1E,STARD13,GSN,IQGAP2,MYO18A,PDE4B,TJP1,PPM1E,LIMCH1,THSD7A,ARHGAP6,WIPF1,ELMO1,KCTD13,ABL2,HIP1,EFS,LDB3,SPECC1L,DAAM2,MYO1D,SHROOM4,AIF1L,FRMD5,MYO9B
3.AD/0.HA	GABA_neurons	Up	GO BP	GOBP_BIOLOGICAL_ADHESION	GOBP_BIOLOGICAL_ADHESION	1.00888	5.52932e-09	3.7634e-06	ADA,MERTK,DNM2,ETS1,ITGA2,PTN,ZBTB16,JAM3,RGCC,ZFHX3,PPARA,PSEN1,RUNX1,DUSP10,ERBB3,ABL1,PTPN22,ANGPT1,ITPKB,MBP,NCAM1,MINK1,SERPINF2,PTPRJ,ROBO1,SYK,MAP4K4,DISC1,AATF,CDH4,CDH7,CDH8,DLC1,PDLIM5,IL1RAPL1,DOCK1,DSCAM,MEGF9,ALCAM,PALLD,KANK1,GREM1,CDH20,CDH19,LAMA3,MAG,PLXNA2,DSCAML1,PREX1,LRRC4C,CNTN2,DOCK5,SRCIN1,COL18A1,SEMA5A,PLXNA4,NRXN3,GPM6B,CTNNA3,RIN2,FREM2,NID1,PRKX,ASTN2,GSN,DOCK8,VAV3,A…
3.AD/0.HA	GABA_neurons	Up	GO BP	GOBP_GLIAL_CELL_DIFFERENTIATION	GOBP_GLIAL_CELL_DIFFERENTIATION	1.94485	3.1793e-08	1.92348e-05	PPARG,PTN,ZNF365,PSEN1,SOX10,NR2E1,DUSP10,LPAR1,ERBB3,ABL1,CNP,MAG,POU3F2,BIN1,PLP1,NKX2-2,GSN,NDRG1,TMEM98,SLC8A3,ASPA,FA2H,MYRF,SH3TC2,DAAM2,MOBP,OPALIN
3.AD/0.HA	GABA_neurons	Up	GO BP	GOBP_NEURON_DEVELOPMENT	GOBP_NEURON_DEVELOPMENT	1.05206	4.38463e-08	2.38743e-05	DNM2,FGFR2,CECR2,NOTCH2,PTCH1,PTN,SPTBN4,JAM3,CD38,ZNF365,RB1,TAOK3,CUX1,MYT1L,NEDD4,PSEN1,NR2E1,RUNX1,CSF1R,LPAR1,TNIK,ALK,ABL1,NCAM1,MINK1,ROBO1,MAP4K4,CNP,DISC1,CDH4,ARMCX5-GPRASP2,PDLIM5,IL1RAPL1,DSCAM,ALCAM,PHACTR1,PALLD,KANK1,KIF13B,GAB1,AUTS2,FRYL,LAMA3,LRP4,MAG,MYO7A,PLXNA2,POU3F2,DSCAML1,PREX1,DIP2B,ZSWIM6,LRRC4C,ADGRB3,CACNG7,SGK1,CNTN2,UGT8,SRCIN1,PICALM,SEMA5A,PLXNA4,NRXN3,GPM6B,PLP1,…
3.AD/0.HA	GABA_neurons	Up	GO BP	GOBP_GLIOGENESIS	GOBP_GLIOGENESIS	1.7006	1.06892e-07	5.29115e-05	SUN2,PPARG,PTN,ZNF365,PSEN1,SOX10,NR2E1,DUSP10,CSF1R,LPAR1,ERBB3,ABL1,CNP,DISC1,BMERB1,MAG,POU3F2,BIN1,PLP1,NKX2-2,GSN,NDRG1,TMEM98,SLC8A3,ASPA,FA2H,MYRF,SH3TC2,DAAM2,MOBP,OPALIN
3.AD/0.HA	GABA_neurons	Up	GO BP	GOBP_CELL_PROJECTION_ORGANIZATION	GOBP_CELL_PROJECTION_ORGANIZATION	0.90453	1.59309e-07	7.22866e-05	DNM2,FGFR2,CECR2,ITGA2,NOTCH2,PTCH1,PTN,SPTBN4,JAM3,QRICH2,CD38,ZNF365,CDK5RAP2,RB1,TAOK3,CDC14B,CUX1,NEDD4,PSEN1,NR2E1,NDE1,CSF1R,LPAR1,TNIK,ALK,ABL1,GRIN2B,NCAM1,MINK1,ROBO1,MAP4K4,CNP,DISC1,CCP110,ANLN,CDH4,ARMCX5-GPRASP2,WASF2,PDLIM5,IL1RAPL1,PACSIN2,FGD4,DSCAM,ALCAM,PHACTR1,PALLD,KANK1,KIF13B,GAB1,AUTS2,FRYL,LAMA3,LRP4,MAG,MYO7A,ENPP2,PLXNA2,POU3F2,DSCAML1,ERMN,PREX1,DIP2B,ZSWIM6,LRRC4C,ADGR…
3.AD/0.HA	GABA_neurons	Up	GO BP	GOBP_CELL_PART_MORPHOGENESIS	GOBP_CELL_PART_MORPHOGENESIS	1.198	2.31715e-07	9.7053e-05	DNM2,FGFR2,NOTCH2,PTCH1,PTN,SPTBN4,ZNF365,TAOK3,CUX1,NEDD4,PSEN1,NR2E1,CSF1R,TNIK,ABL1,NCAM1,MINK1,ROBO1,MAP4K4,CNP,DISC1,CDH4,ARMCX5-GPRASP2,WASF2,PDLIM5,IL1RAPL1,PACSIN2,DSCAM,ALCAM,PHACTR1,PALLD,KANK1,KIF13B,GAB1,AUTS2,LAMA3,LRP4,MAG,ENPP2,PLXNA2,POU3F2,DSCAML1,DIP2B,ZSWIM6,LRRC4C,ADGRB3,CACNG7,SGK1,CNTN2,UGT8,SRCIN1,PICALM,SEMA5A,PLXNA4,NRXN3
3.AD/0.HA	GABA_neurons	Up	GO BP	GOBP_CENTRAL_NERVOUS_SYSTEM_DEVELOPMENT	GOBP_CENTRAL_NERVOUS_SYSTEM_DEVELOPMENT	1.05081	2.97027e-07	0.000115522	ETS1,FGFR2,PLCB1,SUN2,SMAD1,PPARG,CHD7,PTCH1,PTN,SPTBN4,ZBTB16,ZNF365,CDK5RAP2,ZFHX3,PAX6,PSEN1,SOX10,NR2E1,NDE1,DUSP10,CSF1R,LPAR1,ALK,ABL1,GRIN2B,MBP,ROBO1,CNP,DISC1,BMERB1,DLC1,PHACTR1,MAG,PLXNA2,POU3F2,DSCAML1,ZSWIM6,UGT8,SEMA5A,PLXNA4,GDF11,MEIS1,SCIN,CLN8,BIN1,PADI2,PLP1,NKX2-2,GSN,TMEM98,RORA,MOG,SLC8A3,NCOA6,PBX3,SYNJ2,ASPA,FA2H,KDM7A,MYRF,ZIC1,CDH1,MAL,DAAM2,MYO1D,SHROOM4,MOBP,MDGA2,C21O…
3.AD/0.HA	GABA_neurons	Up	GO BP	GOBP_CELLULAR_COMPONENT_MORPHOGENESIS	GOBP_CELLULAR_COMPONENT_MORPHOGENESIS	1.1229	4.29042e-07	0.000155742	DNM2,FGFR2,NOTCH2,PTCH1,PTN,SPTBN4,ZNF365,TAOK3,CUX1,NEDD4,PSEN1,NR2E1,CSF1R,TNIK,ABL1,NCAM1,MINK1,ROBO1,MAP4K4,CNP,PHLDB1,DISC1,CDH4,ARMCX5-GPRASP2,WASF2,PDLIM5,IL1RAPL1,PACSIN2,DSCAM,ALCAM,PHACTR1,PALLD,KANK1,KIF13B,GAB1,AUTS2,LAMA3,LRP4,MAG,ENPP2,PLXNA2,POU3F2,DSCAML1,DIP2B,ZSWIM6,LRRC4C,ADGRB3,CACNG7,SGK1,CNTN2,UGT8,SRCIN1,PICALM,SEMA5A,PLXNA4,NRXN3,MTMR2,LDB3,MOBP
3.AD/0.HA	GABA_neurons	Up	GO BP	GOBP_SYNAPSE_ORGANIZATION	GOBP_SYNAPSE_ORGANIZATION	1.39475	7.10767e-07	0.000241883	SHISA6,PTN,FZD5,ZNF365,CTBP2,NEDD4,PSEN1,ABL1,GRIN2B,DISC1,ARMCX5-GPRASP2,CDH8,WASF2,PDLIM5,IL1RAPL1,DSCAM,LRP4,LRRC4C,ADGRB3,CNTN2,SRCIN1,UNC13C,CACNB2,NFIA,NDRG1,SLC8A3,ABHD17B,MTMR2,CACNG2,ELFN1,LRRTM3,CDH1,TANC1,IGSF21,COL4A5,LRFN2,CTTNBP2,ZNF804A
3.AD/0.HA	GABA_neurons	Up	GO BP	GOBP_CELL_MORPHOGENESIS_INVOLVED_IN_NEURON_DIFFERENTIATION	GOBP_CELL_MORPHOGENESIS_INVOLVED_IN_NEURON_DIFFERENTIATION	1.22356	8.33975e-07	0.000262892	DNM2,FGFR2,NOTCH2,PTCH1,PTN,SPTBN4,ZNF365,RB1,CUX1,NEDD4,PSEN1,NR2E1,CSF1R,TNIK,ABL1,NCAM1,MINK1,ROBO1,CNP,DISC1,CDH4,ARMCX5-GPRASP2,PDLIM5,IL1RAPL1,DSCAM,ALCAM,PHACTR1,PALLD,KIF13B,GAB1,AUTS2,LAMA3,LRP4,MAG,MYO7A,PLXNA2,POU3F2,DSCAML1,DIP2B,ZSWIM6,LRRC4C,ADGRB3,CNTN2,SRCIN1,PICALM,SEMA5A,PLXNA4,NRXN3
3.AD/0.HA	GABA_neurons	Up	GO BP	GOBP_MULTICELLULAR_ORGANISMAL_SIGNALING	GOBP_MULTICELLULAR_ORGANISMAL_SIGNALING	1.80079	8.69064e-07	0.000262892	GLRA1,ITGA2,SPTBN4,JAM3,MAG,CACNG7,CACNB2,KCNMB2,BIN1,CTNNA3,KCNJ3,CACNA1C,CACNA1D,CAMK2D,CHRM5,ITPR1,ITPR2,SLC8A3,STIM1,CACNG2,CACNG4,KCNIP1,KCNJ14,RYR3
3.AD/0.HA	GABA_neurons	Up	GO BP	GOBP_CELL_MORPHOGENESIS_INVOLVED_IN_DIFFERENTIATION	GOBP_CELL_MORPHOGENESIS_INVOLVED_IN_DIFFERENTIATION	1.12374	9.1983e-07	0.000263604	MERTK,DNM2,FGFR2,NOTCH2,PTCH1,PTN,SPTBN4,ZNF365,RB1,CUX1,NEDD4,PSEN1,NR2E1,CSF1R,TNIK,ABL1,NCAM1,MINK1,ROBO1,CNP,DISC1,CDH4,ARMCX5-GPRASP2,PDLIM5,IL1RAPL1,DOCK1,DSCAM,MEGF9,ALCAM,PHACTR1,PALLD,SIPA1L3,KANK1,KIF13B,GAB1,AUTS2,LAMA3,LRP4,MAG,MYO7A,PLXNA2,POU3F2,DSCAML1,PREX1,DIP2B,ZSWIM6,LRRC4C,ADGRB3,CNTN2,DOCK5,SRCIN1,COL18A1,PICALM,SEMA5A,PLXNA4,NRXN3
3.AD/0.HA	GABA_neurons	Up	GO BP	GOBP_CELL_MIGRATION	GOBP_CELL_MIGRATION	0.853844	1.03508e-06	0.000279423	ADA,MERTK,ETS1,PLCB1,SUN2,AGO2,ITGA2,PPARG,PTN,ADIPOR2,JAM3,CYP7B1,ARID2,RGCC,FOXO3,MITF,NFATC2,PSEN1,SOX10,NR2E1,NDE1,DUSP10,CSF1R,LPAR1,ABL1,ANGPT1,MINK1,PTPRJ,ROBO1,SYK,MAP4K4,RFFL,DISC1,BMERB1,SMPD3,ANLN,WASF2,DLC1,FMNL2,DOCK1,MEGF9,PHACTR1,PALLD,KANK1,GAB1,AUTS2,GREM1,LAMA3,MAG,ENPP2,PLXNA2,POU3F2,PREX1,RHOU,SGK1,DOCK5,SRCIN1,LIMD1,SEMA5A,FMNL3,PLXNA4,LOX,CTNNA3,RIN2,PRKX,PLCG2,PRR5L,STARD13…
3.AD/0.HA	GABA_neurons	Up	GO BP	GOBP_REGULATION_OF_CELLULAR_COMPONENT_MOVEMENT	GOBP_REGULATION_OF_CELLULAR_COMPONENT_MOVEMENT	0.987506	1.09431e-06	0.000279423	ADA,ETS1,PLCB1,SUN2,AGO2,ITGA2,PPARG,PTN,ADIPOR2,JAM3,ARID2,TF,RGCC,FOXO3,MITF,NR2E1,DUSP10,CSF1R,LPAR1,ERBB3,ABL1,ANGPT1,MINK1,PTPRJ,ROBO1,MAP4K4,RFFL,BMERB1,SMPD3,DLC1,DOCK1,PHACTR1,KANK1,GAB1,GREM1,LAMA3,ENPP2,PLXNA2,PREX1,ZSWIM6,SGK1,DOCK5,SRCIN1,SEMA5A,PLXNA4,BIN1,CTNNA3,CACNA1C,CAMK2D,RIN2,PRKX,PLCG2,PRR5L,STARD13,PADI2,PLP1,NKD1,DOCK8,ONECUT1,PDE4B,LDLRAD4,TJP1,LIMCH1,PLA2G7,MTUS1,ABL2,MGA…
3.AD/0.HA	GABA_neurons	Up	GO BP	GOBP_REGULATION_OF_CELL_ADHESION	GOBP_REGULATION_OF_CELL_ADHESION	1.1341	1.12898e-06	0.000279423	ADA,DNM2,ETS1,ITGA2,PTN,ZBTB16,JAM3,RGCC,ZFHX3,PPARA,RUNX1,DUSP10,ERBB3,ABL1,PTPN22,ANGPT1,ITPKB,MBP,MINK1,SERPINF2,PTPRJ,SYK,MAP4K4,DISC1,DLC1,DOCK1,DSCAM,KANK1,GREM1,LAMA3,PLXNA2,PREX1,DOCK5,SEMA5A,PLXNA4,GPM6B,RIN2,NID1,PRKX,GSN,DOCK8,VAV3,ADAMTS18,ONECUT1,MEGF10,UBASH3B,SOCS6,TJP1,LIMCH1,ARHGAP6,ABL2,CDH1,FRMD5,EDIL3,RSU1
3.AD/0.HA	GABA_neurons	Up	GO BP	GOBP_CYTOSKELETON_ORGANIZATION	GOBP_CYTOSKELETON_ORGANIZATION	0.874403	1.50238e-06	0.000355672	SUN2,CECR2,TUBB8,NOTCH2,SPTBN4,JAM3,TF,CDK5RAP2,RGCC,CDC14B,NDE1,CSF1R,LPAR1,TNIK,ABL1,IKBKB,MID1,MINK1,SERPINF2,C10ORF90,CNP,TTLL11,TOGARAM2,PHLDB1,MTCL1,SIK3,DISC1,NCKAP5,FIGN,TTLL7,KAT2B,BMERB1,CCP110,INF2,ANLN,WASF2,DLC1,PDLIM5,PACSIN2,FMNL2,FGD4,SYNE3,PHACTR1,PALLD,SIPA1L3,KANK1,GAB1,AUTS2,MYO7A,ERMN,PREX1,RHOU,UGT8,LIMD1,SEMA5A,FMNL3,SCIN,GPM6B,CLN8,BIN1,CTNNA3,MYO1E,STARD13,GSN,IQGAP2,MYO1…
3.AD/0.HA	GABA_neurons	Up	GO BP	GOBP_LOCOMOTION	GOBP_LOCOMOTION	0.775283	2.05755e-06	0.000466806	ADA,MERTK,ETS1,PLCB1,SUN2,AGO2,ITGA2,NOTCH2,PPARG,PTCH1,PTN,SPTBN4,ADIPOR2,JAM3,QRICH2,CYP7B1,ARID2,TF,RGCC,FOXO3,MITF,NFATC2,PSEN1,SOX10,NR2E1,NDE1,DUSP10,CSF1R,LPAR1,ERBB3,ABL1,ANGPT1,GPR37,NCAM1,MINK1,PTPRJ,ROBO1,SYK,MAP4K4,RFFL,DISC1,BMERB1,SMPD3,ANLN,CDH4,WASF2,DLC1,FMNL2,DOCK1,DSCAM,MEGF9,ALCAM,PHACTR1,PALLD,KANK1,GAB1,AUTS2,GREM1,LAMA3,MAG,ENPP2,PLXNA2,POU3F2,DSCAML1,PREX1,ZSWIM6,RHOU,SGK1…
3.AD/0.HA	GABA_neurons	Up	GO BP	GOBP_NEGATIVE_REGULATION_OF_SIGNALING	GOBP_NEGATIVE_REGULATION_OF_SIGNALING	0.863509	2.58451e-06	0.000562905	ADA,DNM2,GLRA1,SHISA6,PPARG,PTCH1,CYP7B1,CD38,NCOR2,RB1,CRY1,TAOK3,BCL2L1,HIPK2,NEDD4,WWOX,PPARA,PSEN1,SOX10,ZNF536,NR1H4,DUSP10,CNKSR3,LPAR1,SPRED2,ERBB3,RASA3,PHLPP1,ABL1,PTPN22,IRS1,NLK,PTPRJ,ROBO1,DUSP16,RASSF2,RFFL,LATS2,AATF,TRAP1,SAMHD1,DLC1,KANK1,GREM1,LRP4,LIMD1,SH3BP4,PIP4K2A,BICC1,PRR5L,PADI2,NXN,NKD1,ONECUT1,INPP5D,ITPR1,RORA,UBASH3B,SOCS6,CD22,PDE4B,SYTL4,CARD8,NFATC1,ERBIN,LITAF,LDL…
3.AD/0.HA	GABA_neurons	Up	GO BP	GOBP_OLIGODENDROCYTE_DEVELOPMENT	GOBP_OLIGODENDROCYTE_DEVELOPMENT	2.9697	3.4965e-06	0.000732247	SOX10,LPAR1,MAG,PLP1,NKX2-2,GSN,ASPA,FA2H,MYRF,MOBP
3.AD/0.HA	GABA_neurons	Up	GO BP	GOBP_REGULATION_OF_SYSTEM_PROCESS	GOBP_REGULATION_OF_SYSTEM_PROCESS	1.15161	6.28537e-06	0.00122611	ADA,GLRA1,ITGA2,SHISA6,SPTBN4,CD38,CRY1,FOXO3,PPARA,SOX10,GTF2IRD1,ADRA1B,FBXO32,GCH1,MAG,CACNG7,SGK1,DOCK5,CACNB2,KCNMB2,BIN1,CTNNA3,KCNJ3,CACNA1C,CACNA1D,CAMK2D,CYP2J2,TMEM98,ITPR1,ITPR2,PDE4B,SLC8A3,STIM1,MTMR2,CHRM3,PDE9A,CACNG2,CACNG4,KCNIP1,KCNJ14,RYR3,MYRF,SHISA9,DLGAP4,BEGAIN
3.AD/0.HA	GABA_neurons	Up	GO BP	GOBP_AXON_ENSHEATHMENT_IN_CENTRAL_NERVOUS_SYSTEM	GOBP_AXON_ENSHEATHMENT_IN_CENTRAL_NERVOUS_SYSTEM	3.7486	6.45583e-06	0.00122611	SOX10,MAG,PLP1,ASPA,FA2H,MYRF,MOBP
3.AD/0.HA	GABA_neurons	Up	GO BP	GOBP_REGULATION_OF_GLIAL_CELL_DIFFERENTIATION	GOBP_REGULATION_OF_GLIAL_CELL_DIFFERENTIATION	2.5073	6.53027e-06	0.00122611	PPARG,PTN,ZNF365,NR2E1,DUSP10,MAG,BIN1,NKX2-2,TMEM98,ASPA,DAAM2,OPALIN
3.AD/0.HA	GABA_neurons	Up	GO BP	GOBP_CIRCULATORY_SYSTEM_DEVELOPMENT	GOBP_CIRCULATORY_SYSTEM_DEVELOPMENT	0.902398	8.5203e-06	0.00154643	ETS1,FGFR2,AGO2,SMAD1,NOTCH2,PPARG,CHD7,PTCH1,PTN,FZD5,ADIPOR2,JAM3,QKI,ARID2,RB1,RGCC,HIPK2,NFATC2,NFATC3,PAX6,PPARA,PSEN1,NR2E1,RUNX1,ERBB3,ABL1,ANGPT1,SERPINF2,ROBO1,SYK,KAT2B,WASF2,DLC1,PDLIM5,GAB1,GREM1,ENPP2,ADGRB3,COL18A1,SEMA5A,FMNL3,SH3PXD2B,LOX,MEIS1,LRP5L,CACNA1C,MYO1E,RIN2,ADAMTS6,ANKS6,FREM2,PRKX,BICC1,STARD13,NXN,VAV3,RORA,APOLD1,NFATC1,TJP1,PAK4,THSD7A,SHB,STIM1,NCOA6,SGCD,RBM20,CD…
3.AD/0.HA	GABA_neurons	Up	GO BP	GOBP_REGULATION_OF_OLIGODENDROCYTE_DIFFERENTIATION	GOBP_REGULATION_OF_OLIGODENDROCYTE_DIFFERENTIATION	3.00836	8.95766e-06	0.00157337	PPARG,PTN,ZNF365,DUSP10,NKX2-2,TMEM98,ASPA,DAAM2,OPALIN
3.AD/0.HA	GABA_neurons	Up	GO BP	GOBP_REGULATION_OF_CELL_PROJECTION_ORGANIZATION	GOBP_REGULATION_OF_CELL_PROJECTION_ORGANIZATION	1.08753	9.90973e-06	0.0016862	DNM2,ITGA2,PTN,CD38,ZNF365,CUX1,NEDD4,PSEN1,NR2E1,LPAR1,TNIK,ALK,GRIN2B,ROBO1,DISC1,CCP110,ANLN,CDH4,ARMCX5-GPRASP2,WASF2,PDLIM5,IL1RAPL1,DSCAM,KANK1,KIF13B,AUTS2,LRP4,MAG,ENPP2,PLXNA2,POU3F2,ERMN,PREX1,DIP2B,LRRC4C,ADGRB3,SRCIN1,SEMA5A,PLXNA4,PLD1,ABHD17B,ABL2,CDKL1,STYXL1,PTPN9,ZNF804A,DENND5A
3.AD/0.HA	GABA_neurons	Up	GO BP	GOBP_VASCULATURE_DEVELOPMENT	GOBP_VASCULATURE_DEVELOPMENT	1.04814	1.06508e-05	0.00172842	ETS1,FGFR2,AGO2,SMAD1,NOTCH2,PPARG,CHD7,PTN,FZD5,ADIPOR2,JAM3,QKI,ARID2,RGCC,HIPK2,NFATC2,NFATC3,PAX6,PSEN1,NR2E1,RUNX1,ABL1,ANGPT1,SERPINF2,ROBO1,SYK,WASF2,GAB1,GREM1,ENPP2,ADGRB3,COL18A1,SEMA5A,FMNL3,LOX,MEIS1,LRP5L,MYO1E,RIN2,ADAMTS6,PRKX,STARD13,VAV3,RORA,APOLD1,NFATC1,TJP1,PAK4,THSD7A,SHB,STIM1
3.AD/0.HA	GABA_neurons	Up	GO BP	GOBP_CIRCULATORY_SYSTEM_PROCESS	GOBP_CIRCULATORY_SYSTEM_PROCESS	1.10756	1.07927e-05	0.00172842	ADA,PPARG,CHD7,SPTBN4,CD38,PPARA,ADRA1B,ANGPT1,SERPINF2,PTPRJ,GCH1,CACNG7,SGK1,DOCK5,FLI1,NPR3,SLC24A3,SLC22A3,CACNB2,SLC4A8,KCNMB2,BIN1,CTNNA3,KCNJ3,CACNA1C,CACNA1D,CAMK2D,CYP2J2,GSN,ITPR1,ITPR2,PDE4B,MYOF,TJP1,SLC8A3,STIM1,ABCC4,CHRM3,CACNG2,SLC44A1,CACNG4,KCNIP1,KCNJ14,RYR3,SGCD,SLC4A4
3.AD/0.HA	GABA_neurons	Up	GO BP	GOBP_CARDIAC_CONDUCTION	GOBP_CARDIAC_CONDUCTION	1.83872	1.34248e-05	0.00208852	SPTBN4,CACNG7,CACNB2,BIN1,CTNNA3,KCNJ3,CACNA1C,CACNA1D,CAMK2D,ITPR1,ITPR2,SLC8A3,STIM1,CACNG2,CACNG4,KCNIP1,KCNJ14,RYR3
3.AD/0.HA	GABA_neurons	Up	GO BP	GOBP_BLOOD_VESSEL_MORPHOGENESIS	GOBP_BLOOD_VESSEL_MORPHOGENESIS	1.10644	1.45292e-05	0.002155	ETS1,FGFR2,AGO2,SMAD1,NOTCH2,PPARG,CHD7,PTN,FZD5,ADIPOR2,JAM3,QKI,ARID2,RGCC,HIPK2,NR2E1,RUNX1,ABL1,ANGPT1,SERPINF2,ROBO1,SYK,WASF2,GAB1,GREM1,ENPP2,ADGRB3,COL18A1,SEMA5A,FMNL3,LOX,MEIS1,LRP5L,MYO1E,RIN2,PRKX,STARD13,VAV3,RORA,APOLD1,TJP1,PAK4,THSD7A,SHB,STIM1
3.AD/0.HA	GABA_neurons	Up	GO BP	GOBP_REGULATION_OF_BLOOD_CIRCULATION	GOBP_REGULATION_OF_BLOOD_CIRCULATION	1.43304	1.46437e-05	0.002155	ADA,SPTBN4,CD38,ADRA1B,GCH1,CACNG7,DOCK5,CACNB2,KCNMB2,BIN1,CTNNA3,KCNJ3,CACNA1C,CACNA1D,CAMK2D,CYP2J2,ITPR1,ITPR2,PDE4B,SLC8A3,STIM1,CHRM3,CACNG2,CACNG4,KCNIP1,KCNJ14,RYR3
3.AD/0.HA	GABA_neurons	Up	GO BP	GOBP_POSITIVE_REGULATION_OF_MULTICELLULAR_ORGANISMAL_PROCESS	GOBP_POSITIVE_REGULATION_OF_MULTICELLULAR_ORGANISMAL_PROCESS	0.797022	1.60398e-05	0.00229833	ADA,TOB2,ETS1,FGFR2,PLCB1,AGO2,ITGA2,SMAD1,NOTCH2,PPARG,CHD7,KDM3A,PTN,SPTBN4,ZBTB16,FZD5,ADIPOR2,CD38,ZNF365,ELOVL6,RB1,RGCC,CUX1,SPEN,FOXO3,HIPK2,PSEN1,SOX10,NR2E1,RUNX1,NR1H4,DUSP10,CSF1R,ADRA1B,ERBB3,ABL1,PTPN22,ITPKB,MBP,SERPINF2,PTPRJ,ROBO1,SYK,DISC1,GCH1,POLR2F,CDH4,ARMCX5-GPRASP2,IL1RAPL1,DSCAM,GAB1,GREM1,MAG,PLXNA2,POU3F2,ADGRB3,SEMA5A,PLXNA4,GPM6B,BIN1,CAMK2D,ESRRG,GATM,PLCG2,MAN2A1,NKX…
3.AD/0.HA	GABA_neurons	Up	GO BP	GOBP_REGULATION_OF_CELL_DIFFERENTIATION	GOBP_REGULATION_OF_CELL_DIFFERENTIATION	0.755915	1.93626e-05	0.00263573	ADA,TOB2,DNM2,ETS1,FGFR2,PLCB1,SMAD1,NOTCH2,PPARG,CHD7,KDM3A,PTCH1,PTN,ZBTB16,ZNF365,CDK5RAP2,RB1,RGCC,CUX1,ZHX2,SPEN,ZHX3,FOXO3,MITF,ZFHX3,NFATC2,NFATC3,PAX6,PPARA,PSEN1,SOX10,NR2E1,RUNX1,ZNF536,DUSP10,SPRED2,ALK,ABL1,IKBKB,ITPKB,SERPINF2,ROBO1,SYK,RASSF2,PHLDB1,DISC1,KAT2B,CDH4,ARMCX5-GPRASP2,IL1RAPL1,DOCK1,DSCAM,KANK1,GREM1,LRP4,MAG,PLXNA2,POU3F2,PREX1,DIP2B,DOCK5,LIMD1,SEMA5A,PLXNA4,GDF11,LOX…
3.AD/0.HA	GABA_neurons	Up	GO BP	GOBP_REGULATION_OF_NEURON_PROJECTION_DEVELOPMENT	GOBP_REGULATION_OF_NEURON_PROJECTION_DEVELOPMENT	1.21026	2.81131e-05	0.00373355	PTN,CD38,ZNF365,CUX1,NEDD4,PSEN1,NR2E1,LPAR1,TNIK,ALK,ROBO1,DISC1,CDH4,ARMCX5-GPRASP2,PDLIM5,IL1RAPL1,DSCAM,KANK1,KIF13B,LRP4,MAG,PLXNA2,POU3F2,PREX1,DIP2B,LRRC4C,ADGRB3,SRCIN1,SEMA5A,PLXNA4,ABL2,STYXL1,PTPN9,ZNF804A,DENND5A
3.AD/0.HA	GABA_neurons	Up	GO BP	GOBP_REGULATION_OF_CELL_DEVELOPMENT	GOBP_REGULATION_OF_CELL_DEVELOPMENT	1.15238	2.89847e-05	0.00375765	DNM2,PLCB1,NOTCH2,PPARG,CHD7,PTN,ZNF365,CUX1,SPEN,PAX6,PSEN1,SOX10,NR2E1,DUSP10,ABL1,IKBKB,ROBO1,DISC1,CDH4,ARMCX5-GPRASP2,IL1RAPL1,DOCK1,DSCAM,KANK1,LRP4,MAG,PLXNA2,PREX1,DIP2B,DOCK5,SEMA5A,PLXNA4,BIN1,MAN2A1,NKX2-2,TMEM98,ASPA,DAAM2
3.AD/0.HA	GABA_neurons	Up	GO BP	GOBP_REGULATION_OF_ANATOMICAL_STRUCTURE_MORPHOGENESIS	GOBP_REGULATION_OF_ANATOMICAL_STRUCTURE_MORPHOGENESIS	0.888116	3.34464e-05	0.00423525	ADA,DNM2,ETS1,FGFR2,AGO2,SMAD1,PPARG,PTN,FZD5,RGCC,CUX1,HIPK2,NEDD4,PSEN1,NR2E1,RUNX1,CSF1R,LPAR1,TNIK,ABL1,ROBO1,PHLDB1,DISC1,INF2,CDH4,ARMCX5-GPRASP2,DLC1,PDLIM5,IL1RAPL1,FMNL2,FGD4,SYNE3,DOCK1,DSCAM,KANK1,KIF13B,GAB1,GREM1,LRP4,MAG,ENPP2,PLXNA2,POU3F2,ARHGAP15,ATP10A,ERMN,PREX1,DIP2B,LRRC4C,ADGRB3,RHOU,CACNG7,DOCK5,SRCIN1,LIMD1,SEMA5A,FMNL3,PLXNA4,NKD1,TJP1,PAK4,STIM1
3.AD/0.HA	GABA_neurons	Up	GO BP	GOBP_REGULATION_OF_MULTICELLULAR_ORGANISMAL_DEVELOPMENT	GOBP_REGULATION_OF_MULTICELLULAR_ORGANISMAL_DEVELOPMENT	0.780585	4.1599e-05	0.00514787	ADA,TOB2,ETS1,FGFR2,PLCB1,AGO2,SMAD1,NOTCH2,PPARG,CHD7,PTCH1,PTN,ZBTB16,ZNF365,RB1,RGCC,CUX1,SPEN,FOXO3,HIPK2,MITF,NFATC2,PAX6,PPARA,PSEN1,SOX10,NR2E1,RUNX1,DUSP10,SPRED2,ABL1,IKBKB,ITPKB,ROBO1,SYK,RASSF2,PHLDB1,DISC1,KAT2B,SMPD3,CDH4,ARMCX5-GPRASP2,IL1RAPL1,DSCAM,GAB1,GREM1,LAMA3,LRP4,MAG,ENPP2,PLXNA2,DIP2B,ADGRB3,SEMA5A,PLXNA4,LOX,MEIS1,SCIN,GPM6B,BIN1,PRKX,MAN2A1,NKX2-2,CAMK4,TMEM98,INPP5D,APO…
3.AD/0.HA	GABA_neurons	Up	GO BP	GOBP_DENDRITE_DEVELOPMENT	GOBP_DENDRITE_DEVELOPMENT	1.4639	4.36286e-05	0.00519557	PTN,ZNF365,CUX1,NEDD4,PSEN1,NR2E1,LPAR1,TNIK,ALK,MINK1,DISC1,ARMCX5-GPRASP2,PDLIM5,IL1RAPL1,DSCAM,PHACTR1,LRP4,PREX1,ADGRB3,SRCIN1,PICALM,PAK4,C21ORF91
3.AD/0.HA	GABA_neurons	Up	GO BP	GOBP_ACTIN_CYTOSKELETON_REORGANIZATION	GOBP_ACTIN_CYTOSKELETON_REORGANIZATION	1.98338	4.38928e-05	0.00519557	NOTCH2,CSF1R,TNIK,ABL1,MINK1,PHACTR1,GAB1,AUTS2,GSN,IQGAP2,TJP1,THSD7A,ABL2,EFS
3.AD/0.HA	GABA_neurons	Up	GO BP	GOBP_REGULATION_OF_SMALL_GTPASE_MEDIATED_SIGNAL_TRANSDUCTION	GOBP_REGULATION_OF_SMALL_GTPASE_MEDIATED_SIGNAL_TRANSDUCTION	1.29838	5.03932e-05	0.0058381	DNM2,NOTCH2,LPAR1,RASA3,ABL1,ITPKB,ROBO1,MAP4K4,DLC1,FGD4,SIPA1L3,KANK1,AUTS2,ARHGAP15,PREX1,RHOU,STARD13,VAV3,ERBIN,ARHGAP6,KCTD13,ABL2,MCF2L,ARAP2,ARHGAP5,LRRD1,MYO9B,ARHGAP23
3.AD/0.HA	GABA_neurons	Up	GO BP	GOBP_REGULATION_OF_HEART_CONTRACTION	GOBP_REGULATION_OF_HEART_CONTRACTION	1.44326	5.32126e-05	0.00603631	ADA,SPTBN4,ADRA1B,GCH1,CACNG7,CACNB2,BIN1,CTNNA3,KCNJ3,CACNA1C,CACNA1D,CAMK2D,CYP2J2,ITPR1,ITPR2,PDE4B,SLC8A3,STIM1,CACNG2,CACNG4,KCNIP1,KCNJ14,RYR3
3.AD/0.HA	GABA_neurons	Up	GO BP	GOBP_ACTIN_FILAMENT_BASED_MOVEMENT	GOBP_ACTIN_FILAMENT_BASED_MOVEMENT	1.72	5.79364e-05	0.00643804	SUN2,WASF2,MYO7A,CACNB2,BIN1,CTNNA3,KCNJ3,CACNA1C,CACNA1D,CAMK2D,MYO1E,GSN,PDE4B,LIMCH1,WIPF1,MYO1D,MYO9B
3.AD/0.HA	GABA_neurons	Up	GO BP	GOBP_CELL_SUBSTRATE_ADHESION	GOBP_CELL_SUBSTRATE_ADHESION	1.24818	5.9465e-05	0.00647574	MERTK,DNM2,ITGA2,PTN,JAM3,ABL1,ANGPT1,MINK1,PTPRJ,MAP4K4,DISC1,DLC1,DOCK1,MEGF9,KANK1,GREM1,PREX1,DOCK5,SRCIN1,GPM6B,RIN2,NID1,PRKX,ONECUT1,LIMCH1,ARHGAP6,SNED1,ITGBL1,EDIL3,RSU1
3.AD/0.HA	GABA_neurons	Up	GO BP	GOBP_GLIAL_CELL_DEVELOPMENT	GOBP_GLIAL_CELL_DEVELOPMENT	1.90387	7.4574e-05	0.00796187	PSEN1,SOX10,LPAR1,MAG,POU3F2,PLP1,NKX2-2,GSN,NDRG1,ASPA,FA2H,MYRF,SH3TC2,MOBP
3.AD/0.HA	GABA_neurons	Up	GO BP	GOBP_REGULATION_OF_CELL_SUBSTRATE_ADHESION	GOBP_REGULATION_OF_CELL_SUBSTRATE_ADHESION	1.48117	7.7446e-05	0.00810949	DNM2,PTN,ABL1,MINK1,PTPRJ,MAP4K4,DISC1,DLC1,DOCK1,KANK1,GREM1,PREX1,DOCK5,GPM6B,RIN2,NID1,ONECUT1,LIMCH1,ARHGAP6,EDIL3,RSU1
3.AD/0.HA	GABA_neurons	Up	GO BP	GOBP_REGULATION_OF_NEUROGENESIS	GOBP_REGULATION_OF_NEUROGENESIS	1.2435	8.3776e-05	0.0086068	PPARG,CHD7,PTN,ZNF365,CUX1,SPEN,PAX6,PSEN1,SOX10,NR2E1,DUSP10,ROBO1,DISC1,CDH4,ARMCX5-GPRASP2,IL1RAPL1,DSCAM,LRP4,MAG,PLXNA2,DIP2B,SEMA5A,PLXNA4,BIN1,MAN2A1,NKX2-2,TMEM98,ASPA,DAAM2
3.AD/0.HA	GABA_neurons	Up	GO BP	GOBP_REGULATION_OF_NERVOUS_SYSTEM_DEVELOPMENT	GOBP_REGULATION_OF_NERVOUS_SYSTEM_DEVELOPMENT	1.14391	8.63097e-05	0.0087029	PPARG,CHD7,PTN,ZNF365,CUX1,SPEN,PAX6,PSEN1,SOX10,NR2E1,DUSP10,ROBO1,DISC1,CDH4,ARMCX5-GPRASP2,IL1RAPL1,DSCAM,LRP4,MAG,PLXNA2,DIP2B,ADGRB3,SEMA5A,PLXNA4,BIN1,MAN2A1,NKX2-2,TMEM98,MTMR2,ASPA,MYRF,LRRTM3,DAAM2
3.AD/0.HA	GABA_neurons	Up	GO BP	GOBP_DENDRITE_MORPHOGENESIS	GOBP_DENDRITE_MORPHOGENESIS	1.71072	0.000100372	0.00993683	PTN,ZNF365,CUX1,NEDD4,NR2E1,TNIK,MINK1,ARMCX5-GPRASP2,PDLIM5,IL1RAPL1,DSCAM,PHACTR1,LRP4,ADGRB3,SRCIN1,PICALM
3.AD/0.HA	GABA_neurons	Up	GO BP	GOBP_POSITIVE_REGULATION_OF_CATALYTIC_ACTIVITY	GOBP_POSITIVE_REGULATION_OF_CATALYTIC_ACTIVITY	0.716632	0.000106154	0.0103215	MERTK,DNM2,FGFR2,PLCB1,ITGA2,PPARG,FZD5,TF,RGCC,TAOK3,CDC14B,CRADD,PSEN1,CSF1R,LPAR1,ERBB3,RASA3,TNIK,PIK3R5,ALK,ABL1,ANGPT1,GRIN2B,IRS1,MBP,MAP3K1,MINK1,ROBO1,SYK,MAP4K4,TRAF4,RASSF2,MTCL1,SNX18,GCH1,DLC1,DOCK1,SIPA1L3,GREM1,ARHGAP15,PREX1,ADGRB3,DOCK5,SRCIN1,PICALM,NPR3,CACNA1C,CACNA1D,RIN2,STARD13,GSN,DOCK8,VAV3,IQGAP2,LCP2,CARD8,GPRC5B,NLRP2,AIM2,PAK4,ADCY2,STIM1,ARHGAP6,RGS10,DNAJC1,PARM1,RG…
3.AD/0.HA	GABA_neurons	Up	GO BP	GOBP_HEART_PROCESS	GOBP_HEART_PROCESS	1.31155	0.000113835	0.0108742	ADA,SPTBN4,ADRA1B,GCH1,CACNG7,CACNB2,BIN1,CTNNA3,KCNJ3,CACNA1C,CACNA1D,CAMK2D,CYP2J2,GSN,ITPR1,ITPR2,PDE4B,SLC8A3,STIM1,CACNG2,CACNG4,KCNIP1,KCNJ14,RYR3,SGCD
3.AD/0.HA	GABA_neurons	Up	GO BP	GOBP_REGULATION_OF_GLIOGENESIS	GOBP_REGULATION_OF_GLIOGENESIS	2.02401	0.00011785	0.0110636	PPARG,PTN,ZNF365,SOX10,NR2E1,DUSP10,MAG,BIN1,NKX2-2,TMEM98,ASPA,DAAM2
3.AD/0.HA	GABA_neurons	Up	GO BP	GOBP_SMALL_GTPASE_MEDIATED_SIGNAL_TRANSDUCTION	GOBP_SMALL_GTPASE_MEDIATED_SIGNAL_TRANSDUCTION	1.03865	0.000138415	0.0125612	DNM2,NOTCH2,RB1,LPAR1,RASA3,ABL1,ITPKB,ROBO1,MAP4K4,WASF2,DLC1,FGD4,DOCK1,SIPA1L3,KANK1,AUTS2,ARHGAP15,PREX1,RHOU,DOCK5,RIN2,STARD13,DOCK8,VAV3,PLD1,ERBIN,ARHGAP6,ELMO1,KCTD13,ABL2,MCF2L,ARAP2,DOCK9,ARHGAP5,LRRD1,MYO9B,ARHGAP23
3.AD/0.HA	GABA_neurons	Up	GO BP	GOBP_POSITIVE_REGULATION_OF_CELL_DEVELOPMENT	GOBP_POSITIVE_REGULATION_OF_CELL_DEVELOPMENT	1.27746	0.000150807	0.0134614	DNM2,PPARG,PTN,ZNF365,CUX1,SPEN,SOX10,ABL1,ROBO1,DISC1,CDH4,ARMCX5-GPRASP2,IL1RAPL1,DOCK1,DSCAM,MAG,PLXNA2,PREX1,DOCK5,SEMA5A,PLXNA4,BIN1,MAN2A1,NKX2-2,ASPA
3.AD/0.HA	GABA_neurons	Up	GO BP	GOBP_BONE_REMODELING	GOBP_BONE_REMODELING	1.96646	0.000164573	0.0144532	NOTCH2,PTN,CD38,TF,MITF,CSF1R,SYK,RASSF2,GREM1,LRP5L,INPP5D,UBASH3B
3.AD/0.HA	GABA_neurons	Up	GO BP	GOBP_TUBE_DEVELOPMENT	GOBP_TUBE_DEVELOPMENT	0.785732	0.000175624	0.015179	ADA,ETS1,FGFR2,AGO2,CECR2,SMAD1,NOTCH2,PPARG,CHD7,PTCH1,PTN,FZD5,ADIPOR2,JAM3,LGR5,QKI,ARID2,RB1,RGCC,HIPK2,PSEN1,SOX10,NR2E1,RUNX1,CSF1R,ABL1,ANGPT1,SERPINF2,ROBO1,SYK,TRAF4,SMPD3,WASF2,DLC1,GAB1,GREM1,ENPP2,PLXNA2,ADGRB3,COL18A1,SEMA5A,FMNL3,GDF11,LOX,MEIS1,LRP5L,MYO1E,RIN2,NFIA,PRKX,STARD13,MAN2A1,NKX2-2,VAV3,RORA,APOLD1,TJP1,ABCA3,PAK4,THSD7A,SHB,STIM1
3.AD/0.HA	GABA_neurons	Up	GO BP	GOBP_POSITIVE_REGULATION_OF_DEVELOPMENTAL_PROCESS	GOBP_POSITIVE_REGULATION_OF_DEVELOPMENTAL_PROCESS	0.728542	0.000194291	0.0160506	ADA,DNM2,ETS1,FGFR2,PLCB1,AGO2,SMAD1,NOTCH2,PPARG,CHD7,PTCH1,PTN,SPTBN4,ZBTB16,ZNF365,RB1,RGCC,CUX1,SPEN,ZHX3,FOXO3,HIPK2,NFATC2,PSEN1,SOX10,NR2E1,RUNX1,NR1H4,DUSP10,LPAR1,ERBB3,ALK,ABL1,ITPKB,SERPINF2,ROBO1,SYK,PHLDB1,DISC1,CDH4,ARMCX5-GPRASP2,IL1RAPL1,DOCK1,DSCAM,GAB1,GREM1,MAG,ENPP2,PLXNA2,POU3F2,PREX1,ADGRB3,CACNG7,DOCK5,SEMA5A,PLXNA4,SCIN,GPM6B,BIN1,RIN2,MAN2A1,NKX2-2,INPP5D,GPRC5B,TJP1,PAK4…
3.AD/0.HA	GABA_neurons	Up	GO BP	GOBP_REGULATION_OF_CELL_MORPHOGENESIS	GOBP_REGULATION_OF_CELL_MORPHOGENESIS	1.25439	0.000208685	0.0167101	DNM2,PTN,CUX1,CSF1R,LPAR1,ABL1,ARMCX5-GPRASP2,DLC1,IL1RAPL1,FMNL2,FGD4,SYNE3,DOCK1,KANK1,ENPP2,PLXNA2,ARHGAP15,ATP10A,ERMN,PREX1,RHOU,CACNG7,DOCK5,LIMD1,FMNL3,PLXNA4
3.AD/0.HA	GABA_neurons	Up	GO BP	GOBP_AXON_DEVELOPMENT	GOBP_AXON_DEVELOPMENT	1.01611	0.000225553	0.0177991	DNM2,FGFR2,NOTCH2,PTCH1,PTN,SPTBN4,JAM3,PSEN1,NR2E1,CSF1R,ABL1,NCAM1,ROBO1,CNP,DISC1,CDH4,DSCAM,ALCAM,PALLD,KIF13B,GAB1,AUTS2,LAMA3,LRP4,MAG,PLXNA2,POU3F2,DSCAML1,DIP2B,ZSWIM6,LRRC4C,CNTN2,PICALM,SEMA5A,PLXNA4,NRXN3,PLP1
3.AD/0.HA	GABA_neurons	Up	GO BP	GOBP_POSITIVE_REGULATION_OF_HYDROLASE_ACTIVITY	GOBP_POSITIVE_REGULATION_OF_HYDROLASE_ACTIVITY	0.85344	0.000239122	0.0186003	DNM2,FGFR2,PLCB1,ITGA2,PPARG,CRADD,LPAR1,RASA3,GRIN2B,MBP,ROBO1,SYK,MAP4K4,MTCL1,SNX18,DLC1,DOCK1,SIPA1L3,ARHGAP15,PREX1,ADGRB3,DOCK5,PICALM,RIN2,STARD13,GSN,DOCK8,VAV3,IQGAP2,CARD8,NLRP2,AIM2,ARHGAP6,RGS10,DNAJC1,RGS7,ABL2,HIP1,UACA,ST18,CASP8AP2,RGS8,RGS6,ARAP2,DOCK9,ARHGAP5,MYO9B,ARHGAP23,RSU1,AGAP1
3.AD/0.HA	GABA_neurons	Up	GO BP	GOBP_TRANSMISSION_OF_NERVE_IMPULSE	GOBP_TRANSMISSION_OF_NERVE_IMPULSE	2.13446	0.000245825	0.0188524	GLRA1,ITGA2,SPTBN4,JAM3,MAG,CACNG7,KCNMB2,CHRM5,CACNG2,CACNG4
3.AD/0.HA	GABA_neurons	Up	GO BP	GOBP_POSITIVE_REGULATION_OF_NEUROGENESIS	GOBP_POSITIVE_REGULATION_OF_NEUROGENESIS	1.38564	0.000249983	0.018905	PPARG,PTN,ZNF365,CUX1,SPEN,SOX10,ROBO1,DISC1,CDH4,ARMCX5-GPRASP2,IL1RAPL1,DSCAM,MAG,PLXNA2,SEMA5A,PLXNA4,BIN1,MAN2A1,NKX2-2,ASPA
3.AD/0.HA	GABA_neurons	Up	GO BP	GOBP_NEGATIVE_REGULATION_OF_RESPONSE_TO_STIMULUS	GOBP_NEGATIVE_REGULATION_OF_RESPONSE_TO_STIMULUS	0.644596	0.000261983	0.0192994	ADA,DNM2,SHISA6,PPARG,PTCH1,CYP7B1,NCOR2,RB1,CRY1,TAOK3,BCL2L1,HIPK2,NEDD4,WWOX,PPARA,PSEN1,SOX10,ZNF536,NR1H4,DUSP10,CNKSR3,LPAR1,SPRED2,ERBB3,RASA3,PHLPP1,ABL1,PTPN22,GPR37,IRS1,NLK,SERPINF2,PTPRJ,ROBO1,DUSP16,RASSF2,RFFL,AOAH,LATS2,AATF,TRAP1,SAMHD1,OGG1,DLC1,KANK1,GREM1,LRP4,LIMD1,SEMA5A,SH3BP4,PIP4K2A,BICC1,PRR5L,PADI2,NXN,NKD1,ADAMTS18,ONECUT1,INPP5D,ITPR1,RORA,UBASH3B,SOCS6,CD22,PDE4B,CARD…
3.AD/0.HA	GABA_neurons	Up	GO BP	GOBP_MYELOID_CELL_DIFFERENTIATION	GOBP_MYELOID_CELL_DIFFERENTIATION	1.10393	0.000264627	0.0192994	TOB2,ETS1,NOTCH2,PPARG,ZBTB16,TF,RB1,FOXO3,HIPK2,MITF,PSEN1,RUNX1,CSF1R,ITPKB,RASSF2,KAT2B,WASF2,FLI1,LOX,MEIS1,PIP4K2A,SCIN,PRKX,CAMK4,INPP5D,UBASH3B,FAXDC2,CSF3R,NCOA6,CBFA2T3
3.AD/0.HA	GABA_neurons	Up	GO BP	GOBP_REGULATION_OF_POSTSYNAPTIC_NEUROTRANSMITTER_RECEPTOR_ACTIVITY	GOBP_REGULATION_OF_POSTSYNAPTIC_NEUROTRANSMITTER_RECEPTOR_ACTIVITY	3.50028	0.000266802	0.0192994	SHISA6,CACNG4,SHISA9,DLGAP4,BEGAIN
3.AD/0.HA	GABA_neurons	Up	GO BP	GOBP_POSITIVE_REGULATION_OF_MOLECULAR_FUNCTION	GOBP_POSITIVE_REGULATION_OF_MOLECULAR_FUNCTION	0.627889	0.000269376	0.0192994	MERTK,DNM2,FGFR2,PLCB1,ITGA2,PPARG,FZD5,TF,RB1,RGCC,TAOK3,CDC14B,CRADD,CTBP2,HIPK2,PAX6,PSEN1,CSF1R,LPAR1,ERBB3,RASA3,TNIK,PIK3R5,ALK,ABL1,ANGPT1,GRIN2B,IKBKB,IRS1,MBP,MAP3K1,MINK1,ROBO1,SYK,MAP4K4,TRAF4,RASSF2,MTCL1,SNX18,GCH1,DLC1,DOCK1,SIPA1L3,GREM1,ARHGAP15,PREX1,ADGRB3,SGK1,DOCK5,SRCIN1,PICALM,SMARCB1,NPR3,CACNB2,CACNA1C,CACNA1D,RIN2,PLCL1,PLCG2,STARD13,GSN,DOCK8,VAV3,IQGAP2,LCP2,CARD8,GPRC5…
3.AD/0.HA	GABA_neurons	Up	GO BP	GOBP_CELL_CELL_SIGNALING	GOBP_CELL_CELL_SIGNALING	0.633587	0.000277316	0.0196102	MERTK,FGFR2,PLCB1,AGO2,GLRA1,SHISA6,CHD7,PTN,FZD5,LGR5,CD38,CRY1,CTBP2,MITF,WWOX,PSEN1,SOX10,NR2E1,RUNX1,NR1H4,ADRA1B,TNIK,ABL1,GRIN2B,IRS1,MBP,MINK1,NLK,SYK,CNP,DISC1,SMPD3,LATS2,CDH8,IL1RAPL1,PACSIN2,KANK1,GREM1,LRP4,LRRC4C,CACNG7,LIMD1,SEMA5A,GLRA2,LRP5L,GRIK5,UNC13C,CACNB2,SLC4A8,KCNJ3,CACNA1C,CACNA1D,BICC1,PLCL1,PLCG2,PLP1,CHRM5,NXN,NKD1,ITPR1,ITPR2,SYTL4,NFATC1,GPRC5B,SLC8A3,RGS10,MTMR2,RBM…
3.AD/0.HA	GABA_neurons	Up	GO BP	GOBP_ACTIN_FILAMENT_ORGANIZATION	GOBP_ACTIN_FILAMENT_ORGANIZATION	1.0625	0.00028987	0.0202352	SPTBN4,TF,RGCC,LPAR1,ABL1,SERPINF2,WASF2,DLC1,PHACTR1,KANK1,MYO7A,ERMN,PREX1,SEMA5A,SCIN,BIN1,CTNNA3,MYO1E,GSN,IQGAP2,TJP1,PPM1E,LIMCH1,ARHGAP6,WIPF1,ELMO1,KCTD13,HIP1,EFS,MYO1D,SHROOM4,AIF1L
3.AD/0.HA	GABA_neurons	Up	GO BP	GOBP_SYNAPTIC_SIGNALING	GOBP_SYNAPTIC_SIGNALING	0.867266	0.000305582	0.0208579	PLCB1,GLRA1,SHISA6,PTN,CD38,CTBP2,PSEN1,NR2E1,ABL1,GRIN2B,MBP,MINK1,CNP,DISC1,CDH8,IL1RAPL1,PACSIN2,LRRC4C,CACNG7,GLRA2,GRIK5,UNC13C,CACNB2,SLC4A8,PLCL1,PLP1,CHRM5,SLC8A3,RGS10,MTMR2,CHRM3,DTNA,CACNG2,CACNG4,KCTD13,KCNQ3,SHISA9,GABRG3,CDH1,PXK,CRHR2,SORCS3,RGS8,CHRNA2,DLGAP4,LRFN2,BEGAIN
3.AD/0.HA	GABA_neurons	Up	GO BP	GOBP_SENSORY_SYSTEM_DEVELOPMENT	GOBP_SENSORY_SYSTEM_DEVELOPMENT	1.11649	0.000308998	0.0208579	MERTK,NOTCH2,CHD7,PTN,FZD5,ZHX2,HIPK2,MITF,PAX6,PSEN1,NR2E1,SPRED2,DSCAM,SIPA1L3,MYO7A,GDF11,SH3PXD2B,MEIS1,LRP5L,SMOC1,CLN8,CACNA1C,FREM2,MAN2A1,NKD1,ADAMTS18,CRYBG3,NHS,PBX3
3.AD/0.HA	GABA_neurons	Up	GO BP	GOBP_SPHINGOLIPID_BIOSYNTHETIC_PROCESS	GOBP_SPHINGOLIPID_BIOSYNTHETIC_PROCESS	1.76427	0.000310282	0.0208579	ELOVL6,ELOVL7,SMPD3,UGT8,CLN8,ST6GALNAC3,ST8SIA6,ST3GAL2,LARGE1,SPTLC2,FA2H,ABCA8,CERS4
3.AD/0.HA	GABA_neurons	Up	GO BP	GOBP_WALKING_BEHAVIOR	GOBP_WALKING_BEHAVIOR	2.97686	0.000316593	0.0210226	GLRA1,CHD7,SPTBN4,HIPK2,CLN8,OXR1
3.AD/0.HA	GABA_neurons	Up	GO BP	GOBP_TUBE_MORPHOGENESIS	GOBP_TUBE_MORPHOGENESIS	0.82592	0.000334995	0.0214533	ETS1,FGFR2,AGO2,CECR2,SMAD1,NOTCH2,PPARG,CHD7,PTCH1,PTN,FZD5,ADIPOR2,JAM3,LGR5,QKI,ARID2,RGCC,HIPK2,PSEN1,SOX10,NR2E1,RUNX1,CSF1R,ABL1,ANGPT1,SERPINF2,ROBO1,SYK,WASF2,DLC1,GAB1,GREM1,ENPP2,ADGRB3,COL18A1,SEMA5A,FMNL3,LOX,MEIS1,LRP5L,MYO1E,RIN2,PRKX,STARD13,VAV3,RORA,APOLD1,TJP1,PAK4,THSD7A,SHB,STIM1
3.AD/0.HA	GABA_neurons	Up	GO BP	GOBP_RECEPTOR_INTERNALIZATION	GOBP_RECEPTOR_INTERNALIZATION	1.74923	0.000339631	0.0214533	DNM2,NEDD4,ANGPT1,SYK,GREM1,CACNG7,PICALM,PLCG2,RAB31,MTMR2,CACNG2,CACNG4,LDLRAP1
3.AD/0.HA	GABA_neurons	Up	GO BP	GOBP_CELL_SURFACE_RECEPTOR_SIGNALING_PATHWAY_INVOLVED_IN_CELL_CELL_SIGNALING	GOBP_CELL_SURFACE_RECEPTOR_SIGNALING_PATHWAY_INVOLVED_IN_CELL_CELL_SIGNALING	0.931723	0.000340269	0.0214533	FGFR2,PLCB1,AGO2,GLRA1,SHISA6,FZD5,LGR5,MITF,WWOX,PSEN1,SOX10,RUNX1,TNIK,ABL1,GRIN2B,NLK,DISC1,LATS2,KANK1,GREM1,LRP4,LIMD1,SEMA5A,GLRA2,GRIK5,BICC1,PLCG2,NXN,NKD1,NFATC1,GPRC5B,SLC8A3,MTMR2,RBMS3,GRK5,CSNK1G1,FAM53B,DAAM2,CHRNA2,APCDD1,AMER2,RNF220
3.AD/0.HA	GABA_neurons	Up	GO BP	GOBP_CALCIUM_ION_TRANSMEMBRANE_TRANSPORT	GOBP_CALCIUM_ION_TRANSMEMBRANE_TRANSPORT	1.21683	0.000342779	0.0214533	CHD7,TRPC7,PSEN1,RASA3,ABL1,GRIN2B,CACNG7,SLC24A3,CACNB2,BIN1,CACNA1C,CACNA1D,CAMK2D,PLCG2,PLP1,ITPR1,ITPR2,UBASH3B,PDE4B,SLC8A3,STIM1,CACNG2,CACNG4,RYR3,FAM155A
3.AD/0.HA	GABA_neurons	Up	GO BP	GOBP_REGULATION_OF_AMPA_RECEPTOR_ACTIVITY	GOBP_REGULATION_OF_AMPA_RECEPTOR_ACTIVITY	2.90224	0.000398165	0.0243597	SHISA6,MINK1,CACNG7,CACNG2,CACNG4,SHISA9
3.AD/0.HA	GABA_neurons	Up	GO BP	GOBP_REGULATION_OF_WNT_SIGNALING_PATHWAY	GOBP_REGULATION_OF_WNT_SIGNALING_PATHWAY	1.10766	0.000428953	0.0259517	FGFR2,SHISA6,LGR5,WWOX,PSEN1,SOX10,RUNX1,ABL1,NLK,DISC1,LATS2,KANK1,GREM1,LRP4,LIMD1,SEMA5A,BICC1,NXN,NKD1,NFATC1,GPRC5B,RBMS3,CSNK1G1,FAM53B,DAAM2,APCDD1,AMER2,RNF220
3.AD/0.HA	GABA_neurons	Up	GO BP	GOBP_POSTSYNAPSE_ORGANIZATION	GOBP_POSTSYNAPSE_ORGANIZATION	1.49157	0.000473732	0.0283459	SHISA6,PTN,ZNF365,GRIN2B,ARMCX5-GPRASP2,WASF2,PDLIM5,IL1RAPL1,LRP4,SRCIN1,NDRG1,ABHD17B,MTMR2,TANC1,LRFN2,ZNF804A
3.AD/0.HA	GABA_neurons	Up	GO BP	GOBP_STRESS_FIBER_ASSEMBLY	GOBP_STRESS_FIBER_ASSEMBLY	1.77276	0.000494258	0.0292526	RGCC,LPAR1,ABL1,SERPINF2,WASF2,DLC1,PHACTR1,TJP1,PPM1E,LIMCH1,ARHGAP6,KCTD13
3.AD/0.HA	GABA_neurons	Up	GO BP	GOBP_HORMONE_MEDIATED_SIGNALING_PATHWAY	GOBP_HORMONE_MEDIATED_SIGNALING_PATHWAY	1.38028	0.000510674	0.0298992	PPARG,KDM3A,ADIPOR2,LGR5,CYP7B1,NCOR2,CRY1,NR3C1,NEDD4,PPARA,NR2E1,RUNX1,LATS2,ESRRG,PADI2,ARID1A,NR3C2,CRHR2
3.AD/0.HA	GABA_neurons	Up	GO BP	GOBP_POSITIVE_REGULATION_OF_NERVOUS_SYSTEM_DEVELOPMENT	GOBP_POSITIVE_REGULATION_OF_NERVOUS_SYSTEM_DEVELOPMENT	1.22739	0.000543842	0.0308539	PPARG,PTN,ZNF365,CUX1,SPEN,SOX10,ROBO1,DISC1,CDH4,ARMCX5-GPRASP2,IL1RAPL1,DSCAM,MAG,PLXNA2,ADGRB3,SEMA5A,PLXNA4,BIN1,MAN2A1,NKX2-2,ASPA,LRRTM3
3.AD/0.HA	GABA_neurons	Up	GO BP	GOBP_CELLULAR_COMPONENT_MAINTENANCE	GOBP_CELLULAR_COMPONENT_MAINTENANCE	2.11309	0.000543981	0.0308539	CTBP2,CSF1R,GRIN2B,ADGRB3,TJP1,ABHD17B,MTMR2,TANC1,ZNF804A
3.AD/0.HA	GABA_neurons	Up	GO BP	GOBP_REGULATION_OF_INTRACELLULAR_SIGNAL_TRANSDUCTION	GOBP_REGULATION_OF_INTRACELLULAR_SIGNAL_TRANSDUCTION	0.591243	0.000579922	0.0325533	ADA,DNM2,FGFR2,PLCB1,NOTCH2,FZD5,TF,TAOK3,BCL2L1,NACC2,HIPK2,NEDD4,PPARA,PSEN1,NR1H4,DUSP10,CSF1R,ADRA1B,CNKSR3,LPAR1,SPRED2,ERBB3,RASA3,TNIK,PHLPP1,PIK3R5,ALK,ABL1,PTPN22,ANGPT1,GPR37,IKBKB,IRS1,ITPKB,MID1,MINK1,SERPINF2,PELI2,PTPRJ,ROBO1,SYK,VRK2,DUSP16,MAP4K4,TRAF4,RASSF2,RFFL,SIK3,TRAP1,DLC1,FGD4,SIPA1L3,KANK1,GAB1,AUTS2,GREM1,ARHGAP15,PREX1,RHOU,LIMD1,SEMA5A,SH3BP4,PIP4K2A,PRR5L,STARD13,VAV3…
3.AD/0.HA	GABA_neurons	Up	GO BP	GOBP_GLYCOSPHINGOLIPID_BIOSYNTHETIC_PROCESS	GOBP_GLYCOSPHINGOLIPID_BIOSYNTHETIC_PROCESS	2.76488	0.000609836	0.0332987	UGT8,ST6GALNAC3,ST8SIA6,ST3GAL2,LARGE1,FA2H
3.AD/0.HA	GABA_neurons	Up	GO BP	GOBP_HEAD_DEVELOPMENT	GOBP_HEAD_DEVELOPMENT	0.817668	0.000609845	0.0332987	ETS1,FGFR2,PLCB1,SUN2,SMAD1,CHD7,PTCH1,PTN,ZNF365,CDK5RAP2,ZFHX3,PSEN1,NR2E1,NDE1,CSF1R,LPAR1,ALK,ABL1,GRIN2B,MBP,ROBO1,CNP,DISC1,BMERB1,DLC1,PHACTR1,PLXNA2,POU3F2,DSCAML1,ZSWIM6,SEMA5A,PLXNA4,MEIS1,PADI2,PLP1,NKX2-2,RORA,SLC8A3,NCOA6,PBX3,SYNJ2,KDM7A,ZIC1,CDH1,MYO1D,SHROOM4,C21ORF91,CTTNBP2
3.AD/0.HA	GABA_neurons	Up	GO BP	GOBP_REGULATION_OF_HYDROLASE_ACTIVITY	GOBP_REGULATION_OF_HYDROLASE_ACTIVITY	0.663068	0.000614289	0.0332987	DNM2,FGFR2,PLCB1,ITGA2,PPARG,PTN,CRADD,NDE1,LPAR1,RASA3,ABL1,GRIN2B,IKBKB,MBP,SERPINF2,ROBO1,SYK,MAP4K4,RFFL,MTCL1,SNX18,DFFA,DLC1,FGD4,DOCK1,PHACTR1,SIPA1L3,PLXNA2,ARHGAP15,PREX1,ADGRB3,DOCK5,PICALM,PLXNA4,SH3BP4,SERPINH1,SORT1,BIN1,CAMK2D,RIN2,STARD13,GSN,DOCK8,VAV3,IQGAP2,CARD8,NLRP2,AIM2,ARHGAP6,RGS10,DNAJC1,RGS7,ABL2,ELFN1,MGAT5,STYXL1,HIP1,PCSK6,UACA,ST18,CASP8AP2,PXK,MYO1D,RGS8,RGS6,ARAP2,…
3.AD/0.HA	GABA_neurons	Up	GO BP	GOBP_REGULATION_OF_TRANS_SYNAPTIC_SIGNALING	GOBP_REGULATION_OF_TRANS_SYNAPTIC_SIGNALING	1.02677	0.000617661	0.0332987	PLCB1,SHISA6,PTN,CD38,PSEN1,NR2E1,ABL1,GRIN2B,DISC1,PACSIN2,LRRC4C,CACNG7,GRIK5,UNC13C,CACNB2,SLC4A8,PLCL1,SLC8A3,MTMR2,CACNG2,CACNG4,KCTD13,SHISA9,CDH1,PXK,CRHR2,SORCS3,DLGAP4,LRFN2,BEGAIN
3.AD/0.HA	GABA_neurons	Up	GO BP	GOBP_POSITIVE_REGULATION_OF_RECEPTOR_MEDIATED_ENDOCYTOSIS	GOBP_POSITIVE_REGULATION_OF_RECEPTOR_MEDIATED_ENDOCYTOSIS	2.24985	0.000631228	0.03343	DNM2,TF,ANGPT1,SYK,GREM1,PLCG2,LDLRAP1,HIP1
3.AD/0.HA	GABA_neurons	Up	GO BP	GOBP_CELLULAR_RESPONSE_TO_ORGANIC_CYCLIC_COMPOUND	GOBP_CELLULAR_RESPONSE_TO_ORGANIC_CYCLIC_COMPOUND	0.922709	0.000638336	0.03343	DNM2,ITGA2,SMAD1,PPARG,KDM3A,PTCH1,PTN,CYP7B1,NCOR2,CRY1,NR3C1,NEDD4,PPARA,SOX10,NR2E1,RUNX1,NR1H4,ALK,ABL1,FBXO32,SGK1,ESRRG,PADI2,CHRM5,ITPR2,RORA,PDE4B,PAK4,ADCY2,SLC8A3,CHRM3,RYR3,MT-ND3,NCOA3,ARID1A,NR3C2,CDH1,RGS8
3.AD/0.HA	GABA_neurons	Up	GO BP	GOBP_G_PROTEIN_COUPLED_ACETYLCHOLINE_RECEPTOR_SIGNALING_PATHWAY	GOBP_G_PROTEIN_COUPLED_ACETYLCHOLINE_RECEPTOR_SIGNALING_PATHWAY	3.15234	0.000644656	0.03343	PLCB1,CHRM5,RGS10,CHRM3,RGS8
3.AD/0.HA	GABA_neurons	Up	GO BP	GOBP_DENDRITIC_SPINE_MAINTENANCE	GOBP_DENDRITIC_SPINE_MAINTENANCE	3.15234	0.000644656	0.03343	GRIN2B,ABHD17B,MTMR2,TANC1,ZNF804A
3.AD/0.HA	GABA_neurons	Up	GO BP	GOBP_IMMUNE_SYSTEM_DEVELOPMENT	GOBP_IMMUNE_SYSTEM_DEVELOPMENT	0.74364	0.000670742	0.0339673	ADA,MERTK,TOB2,ETS1,FGFR2,NOTCH2,PPARG,CHD7,PTN,ZBTB16,FZD5,JAM3,TF,RB1,FOXO3,HIPK2,MITF,NFATC2,PSEN1,RUNX1,DUSP10,CSF1R,PHLPP1,ABL1,PTPN22,ANGPT1,ITPKB,PTPRJ,SYK,RASSF2,KAT2B,SMPD3,SAMHD1,WASF2,SIPA1L3,PREX1,PICALM,FLI1,LOX,MEIS1,PIP4K2A,SCIN,LRP5L,CACNA1C,MYO1E,PRKX,PLCG2,CAMK4,TMEM98,ONECUT1,INPP5D,RORA,UBASH3B,FAXDC2,SLC8A3,CSF3R,NCOA6,CBFA2T3
3.AD/0.HA	GABA_neurons	Up	GO BP	GOBP_CEREBRAL_CORTEX_CELL_MIGRATION	GOBP_CEREBRAL_CORTEX_CELL_MIGRATION	2.44812	0.000673731	0.0339673	SUN2,PSEN1,NR2E1,ROBO1,DISC1,BMERB1,POU3F2
3.AD/0.HA	GABA_neurons	Up	GO BP	GOBP_REGULATION_OF_HEART_RATE_BY_CARDIAC_CONDUCTION	GOBP_REGULATION_OF_HEART_RATE_BY_CARDIAC_CONDUCTION	2.44812	0.000673731	0.0339673	CACNB2,BIN1,CTNNA3,KCNJ3,CACNA1C,CACNA1D,CAMK2D
3.AD/0.HA	GABA_neurons	Up	GO BP	GOBP_APOPTOTIC_PROCESS	GOBP_APOPTOTIC_PROCESS	0.569247	0.000698608	0.0347081	ADA,MERTK,DNM2,DNMT3A,FGFR2,CECR2,NOTCH2,PPARG,PTN,ZBTB16,FZD5,CD38,RB1,RGCC,BCL2L1,CRADD,TXNIP,NACC2,FOXO3,RYBP,HIPK2,NR3C1,MITF,WWOX,PPARA,PSEN1,SOX10,NR2E1,NR1H4,CSF1R,LPAR1,ERBB3,PHLPP1,ALK,ABL1,ANGPT1,IKBKB,ITPKB,MAP4K4,TRAF4,RASSF2,RFFL,LATS2,AATF,TRAP1,BNIP3L,OGG1,DFFA,ARMCX5-GPRASP2,DLC1,FGD4,DOCK1,GREM1,MAG,PREX1,SGK1,SEMA5A,LOX,SCIN,SORT1,CLN8,GRIK5,BIN1,CAMK2D,GSN,DOCK8,NDRG1,VAV3,INPP…
3.AD/0.HA	GABA_neurons	Up	GO BP	GOBP_REGULATION_OF_CELL_SHAPE	GOBP_REGULATION_OF_CELL_SHAPE	1.49076	0.000701173	0.0347081	PTN,CSF1R,LPAR1,DLC1,FMNL2,FGD4,SYNE3,PLXNA2,ARHGAP15,ATP10A,ERMN,RHOU,LIMD1,FMNL3,PLXNA4
3.AD/0.HA	GABA_neurons	Up	GO BP	GOBP_CELL_JUNCTION_ASSEMBLY	GOBP_CELL_JUNCTION_ASSEMBLY	1.01056	0.000738189	0.0362111	ITGA2,FZD5,JAM3,RUNX1,NR1H4,ABL1,IKBKB,PTPRJ,MAP4K4,CDH7,ARMCX5-GPRASP2,CDH8,DLC1,PDLIM5,IL1RAPL1,DSCAM,GREM1,CDH20,CDH19,LAMA3,LRP4,ADGRB3,UGT8,GPM6B,MARVELD2,TJP1,LIMCH1,ARHGAP6,LRRTM3,CDH1,PLEC
3.AD/0.HA	GABA_neurons	Up	GO BP	GOBP_REGULATION_OF_MEMBRANE_POTENTIAL	GOBP_REGULATION_OF_MEMBRANE_POTENTIAL	0.999224	0.000783703	0.0376315	GLRA1,PTN,BCL2L1,NEDD4,PSEN1,ABL1,GRIN2B,BNIP3L,GLRA2,GRIK5,CACNB2,SLC4A8,KCNMB2,BIN1,CTNNA3,KCNJ3,CACNA1C,CACNA1D,CAMK2D,SLC8A3,MTMR2,CACNG2,CACNG4,SLC4A4,KCNH8,KCNQ3,PIEZO2,GABRG3,PXK,RGS7BP,CHRNA2
3.AD/0.HA	GABA_neurons	Up	GO BP	GOBP_POSITIVE_REGULATION_OF_CELL_SUBSTRATE_ADHESION	GOBP_POSITIVE_REGULATION_OF_CELL_SUBSTRATE_ADHESION	1.60678	0.000787878	0.0376315	DNM2,PTN,ABL1,PTPRJ,MAP4K4,DISC1,DOCK1,PREX1,DOCK5,RIN2,NID1,EDIL3,RSU1
3.AD/0.HA	GABA_neurons	Up	GO BP	GOBP_SENSORY_ORGAN_DEVELOPMENT	GOBP_SENSORY_ORGAN_DEVELOPMENT	0.923317	0.000823155	0.0386667	MERTK,FGFR2,CECR2,NOTCH2,CHD7,PTN,FZD5,LGR5,ZHX2,HIPK2,MITF,PAX6,PSEN1,NR2E1,SPRED2,DSCAM,SIPA1L3,MYO7A,GDF11,SH3PXD2B,MEIS1,LRP5L,SMOC1,CLN8,CACNA1C,FREM2,MAN2A1,NKD1,ADAMTS18,CDH23,CRYBG3,NHS,TSHZ1,PBX3,OC90,ZIC1,BNC2
3.AD/0.HA	GABA_neurons	Up	GO BP	GOBP_SUPRAMOLECULAR_FIBER_ORGANIZATION	GOBP_SUPRAMOLECULAR_FIBER_ORGANIZATION	0.824926	0.000823754	0.0386667	SPTBN4,TF,CDK5RAP2,RB1,RGCC,PSEN1,NDE1,LPAR1,ABL1,SERPINF2,NCKAP5,FIGN,BMERB1,WASF2,DLC1,PHACTR1,KANK1,GREM1,MYO7A,ERMN,PREX1,SEMA5A,LOX,SCIN,SERPINH1,BIN1,CTNNA3,MYO1E,GSN,IQGAP2,TJP1,PPM1E,LIMCH1,ARHGAP6,WIPF1,ELMO1,KCTD13,ADAMTS14,HIP1,PXDN,EFS,LDB3,MYO1D,SHROOM4,AIF1L
3.AD/0.HA	GABA_neurons	Up	GO BP	GOBP_REGULATION_OF_RECEPTOR_CLUSTERING	GOBP_REGULATION_OF_RECEPTOR_CLUSTERING	3.63573	0.000871679	0.0405666	SHISA6,PTN,LRP4,GSN
3.AD/0.HA	GABA_neurons	Up	GO BP	GOBP_POSITIVE_REGULATION_OF_GLIAL_CELL_DIFFERENTIATION	GOBP_POSITIVE_REGULATION_OF_GLIAL_CELL_DIFFERENTIATION	2.36052	0.000920776	0.0424884	PPARG,PTN,ZNF365,MAG,BIN1,NKX2-2,ASPA
3.AD/0.HA	GABA_neurons	Up	GO BP	GOBP_CELL_CELL_SIGNALING_BY_WNT	GOBP_CELL_CELL_SIGNALING_BY_WNT	0.915344	0.000955239	0.0437082	FGFR2,PLCB1,AGO2,SHISA6,FZD5,LGR5,MITF,WWOX,PSEN1,SOX10,RUNX1,TNIK,ABL1,NLK,DISC1,LATS2,KANK1,GREM1,LRP4,LIMD1,SEMA5A,BICC1,PLCG2,NXN,NKD1,NFATC1,GPRC5B,RBMS3,GRK5,CSNK1G1,FAM53B,DAAM2,APCDD1,AMER2,RNF220
3.AD/0.HA	GABA_neurons	Up	GO BP	GOBP_ADHERENS_JUNCTION_ORGANIZATION	GOBP_ADHERENS_JUNCTION_ORGANIZATION	1.98027	0.000977546	0.0438414	JAM3,CDH4,CDH7,CDH8,CDH20,CDH19,TJP1,CDH1,CADM2
3.AD/0.HA	GABA_neurons	Up	GO BP	GOBP_REGULATION_OF_HEART_RATE	GOBP_REGULATION_OF_HEART_RATE	1.72979	0.00103581	0.0458537	ADA,SPTBN4,ADRA1B,GCH1,CACNB2,BIN1,CTNNA3,KCNJ3,CACNA1C,CACNA1D,CAMK2D
3.AD/0.HA	GABA_neurons	Up	GO BP	GOBP_REGULATION_OF_ENDOCYTOSIS	GOBP_REGULATION_OF_ENDOCYTOSIS	1.31461	0.00116979	0.0510073	DNM2,ITGA2,PPARG,TF,ABL1,ANGPT1,SYK,PACSIN2,GREM1,PICALM,BIN1,PLCG2,RAB31,CD22,MTMR2,LDLRAP1,ABL2,HIP1
3.AD/0.HA	GABA_neurons	Up	GO BP	GOBP_POSITIVE_REGULATION_OF_CELL_ADHESION	GOBP_POSITIVE_REGULATION_OF_CELL_ADHESION	0.972317	0.00117097	0.0510073	ADA,DNM2,ETS1,ITGA2,PTN,ZBTB16,ZFHX3,RUNX1,DUSP10,ABL1,PTPN22,ANGPT1,ITPKB,SERPINF2,PTPRJ,SYK,MAP4K4,DISC1,DOCK1,PREX1,DOCK5,RIN2,NID1,DOCK8,VAV3,MEGF10,TJP1,FRMD5,EDIL3,RSU1
3.AD/0.HA	GABA_neurons	Up	GO BP	GOBP_CERAMIDE_BIOSYNTHETIC_PROCESS	GOBP_CERAMIDE_BIOSYNTHETIC_PROCESS	1.93041	0.00121507	0.0523315	SMPD3,UGT8,CLN8,ST6GALNAC3,ST8SIA6,ST3GAL2,SPTLC2,FA2H,CERS4
3.AD/0.HA	GABA_neurons	Up	GO BP	GOBP_HEPATOCYTE_APOPTOTIC_PROCESS	GOBP_HEPATOCYTE_APOPTOTIC_PROCESS	3.46583	0.00122059	0.0523315	DNMT3A,RB1,PPARA,GSN
3.AD/0.HA	GABA_neurons	Up	GO BP	GOBP_REGULATION_OF_CELL_DEATH	GOBP_REGULATION_OF_CELL_DEATH	0.574476	0.00125472	0.0533748	ADA,MERTK,DNM2,DNMT3A,FGFR2,NOTCH2,PPARG,PTN,ZBTB16,CD38,RB1,RGCC,BCL2L1,CRADD,TXNIP,NACC2,FOXO3,RYBP,HIPK2,MITF,WWOX,PPARA,PSEN1,SOX10,NR2E1,NR1H4,CSF1R,LPAR1,ERBB3,PHLPP1,ALK,ABL1,ANGPT1,GPR37,GRIN2B,IKBKB,ITPKB,SYK,MAP4K4,TRAF4,RASSF2,RFFL,LATS2,AATF,TRAP1,BNIP3L,OGG1,DFFA,ARMCX5-GPRASP2,DLC1,FGD4,GREM1,MAG,PREX1,SGK1,PICALM,SEMA5A,LOX,SCIN,SORT1,CLN8,GRIK5,BIN1,CAMK2D,PLCG2,GSN,DOCK8,NDRG1,VA…
3.AD/0.HA	GABA_neurons	Up	GO BP	GOBP_POSITIVE_REGULATION_OF_OLIGODENDROCYTE_DIFFERENTIATION	GOBP_POSITIVE_REGULATION_OF_OLIGODENDROCYTE_DIFFERENTIATION	2.87175	0.00132551	0.0558149	PPARG,PTN,ZNF365,NKX2-2,ASPA
3.AD/0.HA	GABA_neurons	Up	GO BP	GOBP_POSITIVE_REGULATION_OF_ENDOCYTOSIS	GOBP_POSITIVE_REGULATION_OF_ENDOCYTOSIS	1.6783	0.00134405	0.0558149	DNM2,ITGA2,PPARG,TF,ANGPT1,SYK,GREM1,PLCG2,RAB31,LDLRAP1,HIP1
3.AD/0.HA	GABA_neurons	Up	GO BP	GOBP_CARDIAC_MUSCLE_CELL_CONTRACTION	GOBP_CARDIAC_MUSCLE_CELL_CONTRACTION	1.90579	0.00135017	0.0558149	CACNB2,BIN1,CTNNA3,KCNJ3,CACNA1C,CACNA1D,CAMK2D,GSN,PDE4B
3.AD/0.HA	GABA_neurons	Up	GO BP	GOBP_REGULATION_OF_MYELOID_CELL_DIFFERENTIATION	GOBP_REGULATION_OF_MYELOID_CELL_DIFFERENTIATION	1.22111	0.00135309	0.0558149	TOB2,ETS1,NOTCH2,ZBTB16,RB1,FOXO3,MITF,RUNX1,ITPKB,RASSF2,KAT2B,LOX,MEIS1,SCIN,CAMK4,INPP5D,UBASH3B,FAXDC2,CSF3R
3.AD/0.HA	GABA_neurons	Up	GO BP	GOBP_PLASMA_MEMBRANE_ORGANIZATION	GOBP_PLASMA_MEMBRANE_ORGANIZATION	1.58727	0.0013636	0.0558255	DNM2,PACSIN2,ATP10A,BIN1,GSN,NDRG1,MYOF,SYTL4,FA2H,MYRF,ANO4,SH3TC2
3.AD/0.HA	GABA_neurons	Up	GO BP	GOBP_NEGATIVE_REGULATION_OF_GLIOGENESIS	GOBP_NEGATIVE_REGULATION_OF_GLIOGENESIS	2.46903	0.00152025	0.0608661	PTN,SOX10,NR2E1,DUSP10,TMEM98,DAAM2
3.AD/0.HA	GABA_neurons	Up	GO BP	GOBP_NEGATIVE_REGULATION_OF_INTRACELLULAR_SIGNAL_TRANSDUCTION	GOBP_NEGATIVE_REGULATION_OF_INTRACELLULAR_SIGNAL_TRANSDUCTION	0.913402	0.00154579	0.0613927	TAOK3,BCL2L1,PPARA,NR1H4,DUSP10,CNKSR3,LPAR1,SPRED2,RASA3,PHLPP1,ABL1,PTPN22,PTPRJ,DUSP16,RASSF2,RFFL,TRAP1,DLC1,KANK1,LIMD1,SH3BP4,ITPR1,RORA,CD22,CARD8,ERBIN,LITAF,DEPTOR,KCTD13,ABL2,OTUD7A,UACA,TRIM59
3.AD/0.HA	GABA_neurons	Up	GO BP	GOBP_POSITIVE_REGULATION_OF_GTPASE_ACTIVITY	GOBP_POSITIVE_REGULATION_OF_GTPASE_ACTIVITY	0.963678	0.00156058	0.0613927	PLCB1,RASA3,MAP4K4,SNX18,DLC1,DOCK1,SIPA1L3,ARHGAP15,PREX1,ADGRB3,DOCK5,PICALM,RIN2,STARD13,DOCK8,VAV3,IQGAP2,ARHGAP6,RGS10,RGS7,RGS8,RGS6,ARAP2,DOCK9,ARHGAP5,MYO9B,ARHGAP23,RSU1,AGAP1
3.AD/0.HA	GABA_neurons	Up	GO BP	GOBP_REGULATION_OF_GTPASE_ACTIVITY	GOBP_REGULATION_OF_GTPASE_ACTIVITY	0.910065	0.00156723	0.0613927	PLCB1,RASA3,MAP4K4,SNX18,DLC1,FGD4,DOCK1,SIPA1L3,PLXNA2,ARHGAP15,PREX1,ADGRB3,DOCK5,PICALM,PLXNA4,SH3BP4,RIN2,STARD13,DOCK8,VAV3,IQGAP2,ARHGAP6,RGS10,RGS7,RGS8,RGS6,ARAP2,DOCK9,ARHGAP5,MYO9B,ARHGAP23,RSU1,AGAP1
3.AD/0.HA	GABA_neurons	Up	GO BP	GOBP_PROTEIN_LOCALIZATION_TO_LYSOSOME	GOBP_PROTEIN_LOCALIZATION_TO_LYSOSOME	2.19966	0.00162528	0.0622095	NEDD4,CACNG7,SH3BP4,SORT1,LAMP2,CACNG2,CACNG4
3.AD/0.HA	GABA_neurons	Up	GO BP	GOBP_MEGAKARYOCYTE_DIFFERENTIATION	GOBP_MEGAKARYOCYTE_DIFFERENTIATION	1.85843	0.00165662	0.0622095	RUNX1,KAT2B,WASF2,FLI1,LOX,MEIS1,PIP4K2A,SCIN,FAXDC2
3.AD/0.HA	GABA_neurons	Up	GO BP	GOBP_NEUTROPHIL_HOMEOSTASIS	GOBP_NEUTROPHIL_HOMEOSTASIS	3.31382	0.00165664	0.0622095	MERTK,JAM3,ITPKB,PDE4B
3.AD/0.HA	GABA_neurons	Up	GO BP	GOBP_CORTICOSTEROID_RECEPTOR_SIGNALING_PATHWAY	GOBP_CORTICOSTEROID_RECEPTOR_SIGNALING_PATHWAY	3.31382	0.00165664	0.0622095	CRY1,NR3C1,NEDD4,ARID1A
3.AD/0.HA	GABA_neurons	Up	GO BP	GOBP_CALCIUM_ION_TRANSMEMBRANE_TRANSPORT_VIA_HIGH_VOLTAGE_GATED_CALCIUM_CHANNEL	GOBP_CALCIUM_ION_TRANSMEMBRANE_TRANSPORT_VIA_HIGH_VOLTAGE_GATED_CALCIUM_CHANNEL	3.31382	0.00165664	0.0622095	CACNB2,BIN1,CACNA1C,CAMK2D
3.AD/0.HA	GABA_neurons	Up	GO BP	GOBP_REGULATION_OF_PLASMA_MEMBRANE_ORGANIZATION	GOBP_REGULATION_OF_PLASMA_MEMBRANE_ORGANIZATION	3.31382	0.00165664	0.0622095	DNM2,ATP10A,GSN,SYTL4
3.AD/0.HA	GABA_neurons	Up	GO BP	GOBP_REGULATION_OF_RAS_PROTEIN_SIGNAL_TRANSDUCTION	GOBP_REGULATION_OF_RAS_PROTEIN_SIGNAL_TRANSDUCTION	1.31228	0.00168144	0.0625402	DNM2,NOTCH2,LPAR1,RASA3,ABL1,ITPKB,ROBO1,MAP4K4,DLC1,KANK1,AUTS2,STARD13,ERBIN,KCTD13,ABL2,LRRD1,MYO9B
3.AD/0.HA	GABA_neurons	Up	GO BP	GOBP_DNA_TEMPLATED_TRANSCRIPTION_INITIATION	GOBP_DNA_TEMPLATED_TRANSCRIPTION_INITIATION	1.18599	0.00168841	0.0625402	NOTCH2,PPARG,NR3C1,MITF,PPARA,NR2E1,NR1H4,KAT2B,CCNH,POLR2F,SMARCB1,ESRRG,RORA,NCOA6,TAF12,CDK8,NR3C2,MAML3,MAML2
3.AD/0.HA	GABA_neurons	Up	GO BP	GOBP_REGULATION_OF_SYNAPSE_STRUCTURE_OR_ACTIVITY	GOBP_REGULATION_OF_SYNAPSE_STRUCTURE_OR_ACTIVITY	1.22137	0.00181902	0.0669226	DNM2,PTN,NEDD4,ABL1,GRIN2B,DISC1,ARMCX5-GPRASP2,CDH8,PDLIM5,IL1RAPL1,LRP4,ADGRB3,SRCIN1,ABHD17B,LRRTM3,LRFN2,CTTNBP2,ZNF804A
3.AD/0.HA	GABA_neurons	Up	GO BP	GOBP_REGULATION_OF_CELL_JUNCTION_ASSEMBLY	GOBP_REGULATION_OF_CELL_JUNCTION_ASSEMBLY	1.28708	0.00183701	0.0671309	FZD5,RUNX1,ABL1,IKBKB,PTPRJ,MAP4K4,ARMCX5-GPRASP2,DLC1,PDLIM5,IL1RAPL1,GREM1,ADGRB3,GPM6B,TJP1,LIMCH1,ARHGAP6,LRRTM3
3.AD/0.HA	GABA_neurons	Up	GO BP	GOBP_NEURON_RECOGNITION	GOBP_NEURON_RECOGNITION	2.162	0.00185388	0.0672958	ROBO1,DSCAM,PALLD,DSCAML1,CNTN2,SEMA5A,NTM
3.AD/0.HA	GABA_neurons	Up	GO BP	GOBP_POSITIVE_REGULATION_OF_CELL_DIFFERENTIATION	GOBP_POSITIVE_REGULATION_OF_CELL_DIFFERENTIATION	0.728845	0.00186777	0.067351	ADA,DNM2,ETS1,PLCB1,SMAD1,NOTCH2,PPARG,PTCH1,PTN,ZBTB16,ZNF365,RB1,RGCC,CUX1,SPEN,ZHX3,FOXO3,SOX10,RUNX1,DUSP10,ABL1,ITPKB,SERPINF2,ROBO1,SYK,DISC1,CDH4,ARMCX5-GPRASP2,IL1RAPL1,DOCK1,DSCAM,GREM1,MAG,PLXNA2,PREX1,DOCK5,SEMA5A,PLXNA4,SCIN,BIN1,RIN2,MAN2A1,NKX2-2,INPP5D,GPRC5B,FAXDC2,OLFM2,ASPA,NCOA3
3.AD/0.HA	GABA_neurons	Up	GO BP	GOBP_POSITIVE_REGULATION_OF_CYSTEINE_TYPE_ENDOPEPTIDASE_ACTIVITY	GOBP_POSITIVE_REGULATION_OF_CYSTEINE_TYPE_ENDOPEPTIDASE_ACTIVITY	1.38896	0.00189801	0.0679914	PPARG,CRADD,GRIN2B,ROBO1,SYK,DLC1,GSN,CARD8,NLRP2,AIM2,HIP1,UACA,ST18,CASP8AP2
3.AD/0.HA	GABA_neurons	Up	GO BP	GOBP_POSITIVE_REGULATION_OF_GLIOGENESIS	GOBP_POSITIVE_REGULATION_OF_GLIOGENESIS	1.96909	0.00191999	0.068329	PPARG,PTN,ZNF365,SOX10,MAG,BIN1,NKX2-2,ASPA
3.AD/0.HA	GABA_neurons	Up	GO BP	GOBP_FOREBRAIN_DEVELOPMENT	GOBP_FOREBRAIN_DEVELOPMENT	0.991622	0.00200808	0.0709541	ETS1,FGFR2,PLCB1,SUN2,CHD7,PTN,PSEN1,NR2E1,NDE1,CSF1R,LPAR1,ALK,ROBO1,CNP,DISC1,BMERB1,DLC1,PHACTR1,POU3F2,ZSWIM6,SEMA5A,PLXNA4,SLC8A3,CDH1,MYO1D,C21ORF91
3.AD/0.HA	GABA_neurons	Up	GO BP	GOBP_CELLULAR_RESPONSE_TO_LIPID	GOBP_CELLULAR_RESPONSE_TO_LIPID	0.854536	0.00201981	0.0709541	FGFR2,ITGA2,PPARG,KDM3A,PTCH1,PTN,ADIPOR2,CYP7B1,NCOR2,CRY1,NR3C1,NEDD4,PPARA,SOX10,NR2E1,RUNX1,NR1H4,LPAR1,ABL1,PTPN22,IRS1,FBXO32,SGK1,ESRRG,PADI2,RORA,PDE4B,CARD8,LITAF,ADCY2,CDK19,MT-ND3,NCOA3,ARID1A,NR3C2,ABL2
3.AD/0.HA	GABA_neurons	Up	GO BP	GOBP_DEVELOPMENTAL_GROWTH	GOBP_DEVELOPMENTAL_GROWTH	0.823637	0.00203632	0.0710752	DNM2,FGFR2,PLCB1,GPR149,SMAD1,NOTCH2,CHD7,PTCH1,PTN,SPTBN4,ARID2,PPARA,SOX10,RUNX1,DUSP10,ABL1,DISC1,SMPD3,LATS2,CDH4,PDLIM5,DSCAM,ALCAM,AUTS2,LRP4,MAG,POU3F2,DIP2B,CACNG7,SEMA5A,PLXNA4,MEIS1,NKD1,GSN,LARGE1,CPQ,NINJ2,BNC2
3.AD/0.HA	GABA_neurons	Up	GO BP	GOBP_HOMOPHILIC_CELL_ADHESION_VIA_PLASMA_MEMBRANE_ADHESION_MOLECULES	GOBP_HOMOPHILIC_CELL_ADHESION_VIA_PLASMA_MEMBRANE_ADHESION_MOLECULES	1.31688	0.00209332	0.072599	ROBO1,CDH4,CDH7,CDH8,DSCAM,PALLD,CDH20,CDH19,DSCAML1,CNTN2,CDH23,PCDH7,CDH1,PCDHGA1,IGSF21
3.AD/0.HA	GABA_neurons	Up	GO BP	GOBP_NEUROMUSCULAR_JUNCTION_DEVELOPMENT	GOBP_NEUROMUSCULAR_JUNCTION_DEVELOPMENT	2.12556	0.00210664	0.072599	PTN,NEDD4,LRP4,UNC13C,CACNB2,CACNG2,COL4A5
3.AD/0.HA	GABA_neurons	Up	GO BP	GOBP_STEROID_HORMONE_MEDIATED_SIGNALING_PATHWAY	GOBP_STEROID_HORMONE_MEDIATED_SIGNALING_PATHWAY	1.42814	0.00217196	0.0740707	KDM3A,CYP7B1,NCOR2,CRY1,NR3C1,NEDD4,PPARA,NR2E1,RUNX1,ESRRG,PADI2,ARID1A,NR3C2
3.AD/0.HA	GABA_neurons	Up	GO BP	GOBP_EPITHELIAL_CELL_APOPTOTIC_PROCESS	GOBP_EPITHELIAL_CELL_APOPTOTIC_PROCESS	1.58047	0.00218699	0.0740707	DNMT3A,RB1,RGCC,PPARA,ABL1,ANGPT1,SEMA5A,SORT1,GSN,PAK4,TMTC4
3.AD/0.HA	GABA_neurons	Up	GO BP	GOBP_COLLAGEN_ACTIVATED_SIGNALING_PATHWAY	GOBP_COLLAGEN_ACTIVATED_SIGNALING_PATHWAY	3.17632	0.00219015	0.0740707	ITGA2,SYK,UBASH3B,COL4A5
3.AD/0.HA	GABA_neurons	Up	GO BP	GOBP_PERIPHERAL_NERVOUS_SYSTEM_DEVELOPMENT	GOBP_PERIPHERAL_NERVOUS_SYSTEM_DEVELOPMENT	1.79002	0.00221835	0.0745613	SOX10,RUNX1,ERBB3,POU3F2,UGT8,PLXNA4,NDRG1,FA2H,SH3TC2
3.AD/0.HA	GABA_neurons	Up	GO BP	GOBP_NEGATIVE_REGULATION_OF_LOCOMOTION	GOBP_NEGATIVE_REGULATION_OF_LOCOMOTION	1.04936	0.00226576	0.075589	ADA,PLCB1,PPARG,PTN,ADIPOR2,ARID2,RGCC,FOXO3,MITF,DUSP10,PTPRJ,ROBO1,BMERB1,DLC1,KANK1,GREM1,SEMA5A,STARD13,PADI2,LDLRAD4,LIMCH1,CDH1,FRMD5
3.AD/0.HA	GABA_neurons	Up	GO BP	GOBP_ORGANOPHOSPHATE_CATABOLIC_PROCESS	GOBP_ORGANOPHOSPHATE_CATABOLIC_PROCESS	1.35663	0.00229058	0.075589	ADA,CNP,SMPD3,SAMHD1,OGG1,ENPP2,PLCG2,AMPD3,PDE4B,MTMR2,PLA2G7,PDE9A,SYNJ2,ENPP6
3.AD/0.HA	GABA_neurons	Up	GO BP	GOBP_REGULATION_OF_AXONOGENESIS	GOBP_REGULATION_OF_AXONOGENESIS	1.35663	0.00229058	0.075589	PSEN1,ROBO1,DISC1,CDH4,DSCAM,KIF13B,LRP4,MAG,PLXNA2,POU3F2,DIP2B,LRRC4C,SEMA5A,PLXNA4
3.AD/0.HA	GABA_neurons	Up	GO BP	GOBP_REGULATION_OF_NERVOUS_SYSTEM_PROCESS	GOBP_REGULATION_OF_NERVOUS_SYSTEM_PROCESS	1.41618	0.00232037	0.076111	GLRA1,ITGA2,SHISA6,SOX10,MAG,TMEM98,SLC8A3,MTMR2,CACNG4,MYRF,SHISA9,DLGAP4,BEGAIN
3.AD/0.HA	GABA_neurons	Up	GO BP	GOBP_REGULATION_OF_B_CELL_RECEPTOR_SIGNALING_PATHWAY	GOBP_REGULATION_OF_B_CELL_RECEPTOR_SIGNALING_PATHWAY	2.63753	0.00242874	0.0782935	RUNX1,PTPN22,CD22,ELF1,ELF2
3.AD/0.HA	GABA_neurons	Up	GO BP	GOBP_POST_EMBRYONIC_DEVELOPMENT	GOBP_POST_EMBRYONIC_DEVELOPMENT	1.76791	0.00243602	0.0782935	FGFR2,AGO2,FZD5,PSEN1,ABL1,DSCAM,MYO7A,MYO1E,ITPR1
3.AD/0.HA	GABA_neurons	Up	GO BP	GOBP_LOCALIZATION_WITHIN_MEMBRANE	GOBP_LOCALIZATION_WITHIN_MEMBRANE	1.76791	0.00243602	0.0782935	SHISA6,PTN,LRP4,CACNG7,GRIK5,GSN,CACNG2,CACNG4,MAL
3.AD/0.HA	GABA_neurons	Up	GO BP	GOBP_REGULATION_OF_CELL_MATRIX_ADHESION	GOBP_REGULATION_OF_CELL_MATRIX_ADHESION	1.47552	0.00245973	0.0783228	ABL1,MINK1,PTPRJ,MAP4K4,DISC1,DLC1,GREM1,GPM6B,RIN2,ONECUT1,LIMCH1,ARHGAP6
3.AD/0.HA	GABA_neurons	Up	GO BP	GOBP_POSITIVE_REGULATION_OF_CELL_DEATH	GOBP_POSITIVE_REGULATION_OF_CELL_DEATH	0.796447	0.00253567	0.0792119	DNM2,DNMT3A,NOTCH2,PPARG,PTN,ZBTB16,RGCC,BCL2L1,CRADD,TXNIP,NACC2,FOXO3,RYBP,WWOX,PSEN1,LPAR1,ABL1,GRIN2B,SYK,RASSF2,LATS2,BNIP3L,DFFA,DLC1,FGD4,PREX1,PICALM,SCIN,SORT1,GRIK5,BIN1,CAMK2D,GSN,VAV3,INPP5D,CDK19,RPS6KA2,STYXL1,MCF2L
3.AD/0.HA	GABA_neurons	Up	GO BP	GOBP_NEURON_PROJECTION_ORGANIZATION	GOBP_NEURON_PROJECTION_ORGANIZATION	1.6434	0.00255458	0.0792119	ZNF365,PSEN1,GRIN2B,ARMCX5-GPRASP2,PDLIM5,SRCIN1,ABHD17B,MTMR2,TANC1,ZNF804A
3.AD/0.HA	GABA_neurons	Up	GO BP	GOBP_CELLULAR_RESPONSE_TO_STEROID_HORMONE_STIMULUS	GOBP_CELLULAR_RESPONSE_TO_STEROID_HORMONE_STIMULUS	1.21384	0.0025586	0.0792119	KDM3A,CYP7B1,NCOR2,CRY1,NR3C1,NEDD4,PPARA,SOX10,NR2E1,RUNX1,FBXO32,SGK1,ESRRG,PADI2,MT-ND3,ARID1A,NR3C2
3.AD/0.HA	GABA_neurons	Up	GO BP	GOBP_REGULATION_OF_ACTIN_FILAMENT_BASED_PROCESS	GOBP_REGULATION_OF_ACTIN_FILAMENT_BASED_PROCESS	0.965897	0.00256039	0.0792119	NOTCH2,SPTBN4,JAM3,RGCC,CSF1R,LPAR1,ABL1,SERPINF2,WASF2,DLC1,KANK1,PREX1,SEMA5A,SCIN,GPM6B,BIN1,CTNNA3,CACNA1C,CAMK2D,GSN,IQGAP2,PDE4B,TJP1,PPM1E,LIMCH1,ARHGAP6,ABL2
3.AD/0.HA	GABA_neurons	Up	GO BP	GOBP_PHOSPHOLIPID_METABOLIC_PROCESS	GOBP_PHOSPHOLIPID_METABOLIC_PROCESS	0.936427	0.00261054	0.0803074	PLCB1,NR1H4,CSF1R,PIK3R5,ITPKB,SMPD3,ENPP2,PIP4K2A,CLN8,PLCG2,CHRM5,INPP5D,PLD1,SOCS6,ABCA3,MTMR2,PLA2G7,SLC44A1,SYNJ2,SPTLC2,ABHD3,PLAAT3,ABCA8,ENPP6,SH3YL1,PIK3C2B,MTMR10,LPCAT2,OC90
3.AD/0.HA	GABA_neurons	Up	GO BP	GOBP_CELL_SUBSTRATE_JUNCTION_ORGANIZATION	GOBP_CELL_SUBSTRATE_JUNCTION_ORGANIZATION	1.53391	0.00274633	0.0840099	ITGA2,ABL1,PTPRJ,MAP4K4,DLC1,GREM1,LAMA3,GPM6B,LIMCH1,ARHGAP6,PLEC
3.AD/0.HA	GABA_neurons	Up	GO BP	GOBP_NEGATIVE_REGULATION_OF_VASCULAR_ASSOCIATED_SMOOTH_MUSCLE_CELL_DIFFERENTIATION	GOBP_NEGATIVE_REGULATION_OF_VASCULAR_ASSOCIATED_SMOOTH_MUSCLE_CELL_DIFFERENTIATION	3.89676	0.0028263	0.0847048	NFATC2,NFATC3,NFATC1
3.AD/0.HA	GABA_neurons	Up	GO BP	GOBP_MEGAKARYOCYTE_DEVELOPMENT	GOBP_MEGAKARYOCYTE_DEVELOPMENT	3.05085	0.00283127	0.0847048	WASF2,FLI1,MEIS1,PIP4K2A
3.AD/0.HA	GABA_neurons	Up	GO BP	GOBP_MYELIN_MAINTENANCE	GOBP_MYELIN_MAINTENANCE	3.05085	0.00283127	0.0847048	NDRG1,FA2H,MYRF,SH3TC2
3.AD/0.HA	GABA_neurons	Up	GO BP	GOBP_CELLULAR_RESPONSE_TO_ETHANOL	GOBP_CELLULAR_RESPONSE_TO_ETHANOL	3.05085	0.00283127	0.0847048	DNMT3A,GLRA1,GLRA2,ITPR2
3.AD/0.HA	GABA_neurons	Up	GO BP	GOBP_NEGATIVE_REGULATION_OF_PHOSPHORUS_METABOLIC_PROCESS	GOBP_NEGATIVE_REGULATION_OF_PHOSPHORUS_METABOLIC_PROCESS	0.847891	0.00291199	0.0861909	PTN,RB1,TAOK3,PPARA,PSEN1,DUSP10,CNKSR3,SPRED2,ABL1,PTPN22,ANGPT1,IKBKB,PTPRJ,DUSP16,RASSF2,KAT2B,LATS2,PHACTR1,GREM1,SRCIN1,PIP4K2A,PRR5L,UBASH3B,LDLRAD4,PPM1E,DEPTOR,SLC8A3,CBFA2T3,ELFN1,MGAT5,STYXL1,MYO1D,TMEM132D
3.AD/0.HA	GABA_neurons	Up	GO BP	GOBP_NEGATIVE_REGULATION_OF_NEURON_DIFFERENTIATION	GOBP_NEGATIVE_REGULATION_OF_NEURON_DIFFERENTIATION	1.85969	0.00292843	0.0861909	CDK5RAP2,ZHX2,NR2E1,ZNF536,MAG,GDF11,MEIS1,NKX2-2
3.AD/0.HA	GABA_neurons	Up	GO BP	GOBP_NEGATIVE_REGULATION_OF_RESPONSE_TO_CYTOKINE_STIMULUS	GOBP_NEGATIVE_REGULATION_OF_RESPONSE_TO_CYTOKINE_STIMULUS	1.85969	0.00292843	0.0861909	PPARG,NR1H4,ROBO1,RFFL,SAMHD1,PADI2,CARD8,PXDN
3.AD/0.HA	GABA_neurons	Up	GO BP	GOBP_ACTOMYOSIN_STRUCTURE_ORGANIZATION	GOBP_ACTOMYOSIN_STRUCTURE_ORGANIZATION	1.24821	0.00299504	0.0876774	RGCC,LPAR1,ABL1,SERPINF2,ANLN,WASF2,DLC1,PHACTR1,MYO18A,TJP1,PPM1E,LIMCH1,ARHGAP6,KCTD13,LDB3,FRMD5
3.AD/0.HA	GABA_neurons	Up	GO BP	GOBP_TRANSCRIPTION_INITIATION_FROM_RNA_POLYMERASE_II_PROMOTER	GOBP_TRANSCRIPTION_INITIATION_FROM_RNA_POLYMERASE_II_PROMOTER	1.2396	0.00310285	0.089867	NOTCH2,PPARG,NR3C1,PPARA,NR2E1,NR1H4,KAT2B,CCNH,POLR2F,ESRRG,RORA,TAF12,CDK8,NR3C2,MAML3,MAML2
3.AD/0.HA	GABA_neurons	Up	GO BP	GOBP_REGULATION_OF_ACTIN_CYTOSKELETON_REORGANIZATION	GOBP_REGULATION_OF_ACTIN_CYTOSKELETON_REORGANIZATION	2.22353	0.00321536	0.0926329	NOTCH2,CSF1R,ABL1,IQGAP2,TJP1,ABL2
3.AD/0.HA	GABA_neurons	Up	GO BP	GOBP_REGULATION_OF_ACTOMYOSIN_STRUCTURE_ORGANIZATION	GOBP_REGULATION_OF_ACTOMYOSIN_STRUCTURE_ORGANIZATION	1.59002	0.00325327	0.093232	RGCC,LPAR1,ABL1,SERPINF2,WASF2,DLC1,TJP1,PPM1E,LIMCH1,ARHGAP6
3.AD/0.HA	GABA_neurons	Up	GO BP	GOBP_RESPONSE_TO_LIPID	GOBP_RESPONSE_TO_LIPID	0.674396	0.0033394	0.0947032	DNMT3A,ETS1,FGFR2,ITGA2,PPARG,KDM3A,PTCH1,PTN,ADIPOR2,CYP7B1,CD38,NCOR2,CRY1,TXNIP,FOXO3,NR3C1,NEDD4,PPARA,SOX10,NR2E1,RUNX1,NR1H4,DUSP10,LPAR1,ABL1,PTPN22,IRS1,FBXO32,CNP,GCH1,OGG1,SGK1,LOX,ESRRG,PLCG2,PADI2,NKX2-2,RORA,PDE4B,CARD8,ERBIN,LITAF,ABCA3,ADCY2,CDK19,MT-ND3,NCOA3,ARID1A,NR3C2,ABL2
3.AD/0.HA	GABA_neurons	Up	GO BP	GOBP_REGULATION_OF_BONE_REMODELING	GOBP_REGULATION_OF_BONE_REMODELING	1.98778	0.00339308	0.0952335	CD38,TF,CSF1R,SYK,GREM1,INPP5D,UBASH3B
3.AD/0.HA	GABA_neurons	Up	GO BP	GOBP_REGULATION_OF_EXECUTION_PHASE_OF_APOPTOSIS	GOBP_REGULATION_OF_EXECUTION_PHASE_OF_APOPTOSIS	2.49962	0.00346152	0.0963805	BCL2L1,RFFL,DFFA,DLC1,MTRNR2L8
3.AD/0.HA	GABA_neurons	Up	GO BP	GOBP_INOSITOL_LIPID_MEDIATED_SIGNALING	GOBP_INOSITOL_LIPID_MEDIATED_SIGNALING	1.21401	0.00346934	0.0963805	PLCB1,NEDD4,CSF1R,ERBB3,PIK3R5,ANGPT1,IRS1,GAB1,NPR3,PIP4K2A,PLCL1,PRR5L,GSN,PLD1,PIK3AP1,PIK3C2B
3.AD/0.HA	GABA_neurons	Up	GO BP	GOBP_AMEBOIDAL_TYPE_CELL_MIGRATION	GOBP_AMEBOIDAL_TYPE_CELL_MIGRATION	0.918604	0.00357384	0.0982243	ETS1,AGO2,ITGA2,PPARG,PTN,ADIPOR2,RGCC,SOX10,NR2E1,DUSP10,ABL1,ANGPT1,ROBO1,MAP4K4,RFFL,ANLN,WASF2,DOCK1,KANK1,GREM1,ENPP2,DOCK5,SEMA5A,RIN2,PRKX,PLCG2,PRR5L,STARD13
3.AD/0.HA	GABA_neurons	Up	GO BP	GOBP_TISSUE_MIGRATION	GOBP_TISSUE_MIGRATION	1.00939	0.00358399	0.0982243	ETS1,ITGA2,PPARG,PTN,RGCC,NR2E1,DUSP10,ABL1,ANGPT1,ROBO1,MAP4K4,ANLN,DOCK1,KANK1,GREM1,ENPP2,DOCK5,SEMA5A,RIN2,PRKX,PLCG2,STARD13
3.AD/0.HA	GABA_neurons	Up	GO BP	GOBP_DENDRITE_SELF_AVOIDANCE	GOBP_DENDRITE_SELF_AVOIDANCE	2.93547	0.00358983	0.0982243	DSCAM,PALLD,DSCAML1,CNTN2
3.AD/0.HA	GABA_neurons	Up	GO BP	GOBP_NEGATIVE_REGULATION_OF_CELL_ADHESION	GOBP_NEGATIVE_REGULATION_OF_CELL_ADHESION	1.06803	0.00371103	0.100606	JAM3,RGCC,PPARA,RUNX1,ERBB3,ABL1,PTPN22,ANGPT1,MBP,MAP4K4,DLC1,DSCAM,KANK1,PLXNA2,SEMA5A,PLXNA4,ADAMTS18,UBASH3B,SOCS6,ARHGAP6,CDH1
3.AD/0.HA	GABA_neurons	Up	GO BP	GOBP_RAS_PROTEIN_SIGNAL_TRANSDUCTION	GOBP_RAS_PROTEIN_SIGNAL_TRANSDUCTION	0.963525	0.00376385	0.101186	DNM2,NOTCH2,RB1,LPAR1,RASA3,ABL1,ITPKB,ROBO1,MAP4K4,WASF2,DLC1,KANK1,AUTS2,RHOU,STARD13,PLD1,ERBIN,ARHGAP6,ELMO1,KCTD13,ABL2,ARHGAP5,LRRD1,MYO9B
3.AD/0.HA	GABA_neurons	Up	GO BP	GOBP_COLLAGEN_FIBRIL_ORGANIZATION	GOBP_COLLAGEN_FIBRIL_ORGANIZATION	1.95531	0.00379232	0.101186	RB1,SERPINF2,GREM1,LOX,SERPINH1,ADAMTS14,PXDN
3.AD/0.HA	GABA_neurons	Up	GO BP	GOBP_PRI_MIRNA_TRANSCRIPTION_BY_RNA_POLYMERASE_II	GOBP_PRI_MIRNA_TRANSCRIPTION_BY_RNA_POLYMERASE_II	1.95531	0.00379232	0.101186	ETS1,SMAD1,PPARG,FOXO3,NR3C1,NFATC3,PPARA
3.AD/0.HA	GABA_neurons	Up	GO BP	GOBP_ANATOMICAL_STRUCTURE_FORMATION_INVOLVED_IN_MORPHOGENESIS	GOBP_ANATOMICAL_STRUCTURE_FORMATION_INVOLVED_IN_MORPHOGENESIS	0.605769	0.00380958	0.101186	ADA,ETS1,FGFR2,AGO2,CECR2,ITGA2,SMAD1,NOTCH2,PPARG,PTCH1,PTN,FZD5,ADIPOR2,JAM3,RGCC,HIPK2,NFATC2,PPARA,PSEN1,NR2E1,RUNX1,ABL1,ANGPT1,ROBO1,SYK,PHLDB1,BMERB1,SMPD3,WASF2,DLC1,DSCAM,GAB1,GREM1,LAMA3,ENPP2,PLXNA2,ADGRB3,UGT8,COL18A1,SEMA5A,FMNL3,MEIS1,PRKX,STARD13,NKD1,VAV3,RORA,APOLD1,MYOF,TJP1,PAK4,THSD7A,SHB,STIM1,MTMR2,CSF3R,TANC1,LDB3,MOBP
3.AD/0.HA	GABA_neurons	Up	GO BP	GOBP_ENDOCYTOSIS	GOBP_ENDOCYTOSIS	0.737709	0.00385608	0.101432	DNM2,ITGA2,PPARG,TF,BCL2L1,NEDD4,ABL1,ANGPT1,SYK,SNX18,WASF2,PACSIN2,DOCK1,GREM1,LRP4,ENPP2,RHOU,CACNG7,PICALM,SH3BP4,SORT1,BIN1,MYO1E,RIN2,PLCG2,GSN,RAB31,MYO18A,MEGF10,CD22,MTMR2,ELMO1,CACNG2,CACNG4,SYNJ2,LDLRAP1,ABL2,CSNK1G1,LDLRAD3,HIP1,LRP1B
3.AD/0.HA	GABA_neurons	Up	GO BP	GOBP_REGULATION_OF_RESPONSE_TO_CYTOKINE_STIMULUS	GOBP_REGULATION_OF_RESPONSE_TO_CYTOKINE_STIMULUS	1.26945	0.00388878	0.101717	PPARG,RUNX1,NR1H4,ANGPT1,IKBKB,ROBO1,SYK,VRK2,RFFL,SAMHD1,PADI2,CARD8,ELF1,PXDN,LIFR
3.AD/0.HA	GABA_neurons	Up	GO BP	GOBP_POSITIVE_REGULATION_OF_PEPTIDASE_ACTIVITY	GOBP_POSITIVE_REGULATION_OF_PEPTIDASE_ACTIVITY	1.18908	0.0039043	0.101717	PPARG,CRADD,GRIN2B,MBP,ROBO1,SYK,DLC1,PICALM,GSN,CARD8,NLRP2,AIM2,HIP1,UACA,ST18,CASP8AP2
3.AD/0.HA	GABA_neurons	Up	GO BP	GOBP_GROWTH	GOBP_GROWTH	0.645616	0.00406262	0.105338	DNM2,FGFR2,PLCB1,GPR149,SMAD1,NOTCH2,PPARG,CHD7,PTCH1,PTN,SPTBN4,ADIPOR2,CD38,ARID2,RB1,PPARA,SOX10,RUNX1,DUSP10,ABL1,PTPRJ,DISC1,SMPD3,LATS2,CDH4,PDLIM5,DSCAM,ALCAM,AUTS2,GREM1,LRP4,MAG,POU3F2,DIP2B,CACNG7,SGK1,SEMA5A,PLXNA4,SH3BP4,MEIS1,CAMK2D,NKD1,GSN,SOCS6,PAK4,LARGE1,CPQ,ZMAT3,HEPACAM,NINJ2,BNC2
3.AD/0.HA	GABA_neurons	Up	GO BP	GOBP_REGULATION_OF_TRANSPORT	GOBP_REGULATION_OF_TRANSPORT	0.508298	0.00410215	0.105859	ADA,MERTK,DNM2,ITGA2,SHISA6,PPARG,CHD7,PTCH1,SPTBN4,FZD5,ADIPOR2,CD38,TF,CRY1,RGCC,NEDD4,PPARA,PSEN1,NR1H4,CNKSR3,ERBB3,ABL1,ANGPT1,GRIN2B,IRS1,MINK1,PTPRJ,SYK,UBE2J2,MTCL1,SMPD3,IWS1,BNIP3L,IL1RAPL1,PACSIN2,GREM1,RHOU,CACNG7,SGK1,PICALM,SCIN,LRP5L,GPM6B,GRIK5,CACNB2,SLC4A8,BIN1,KCNJ3,CACNA1C,CACNA1D,CAMK2D,PLCG2,PRR5L,PLP1,RAB31,ITPR1,ITPR2,MYO18A,PLD1,UBASH3B,CD22,PDE4B,SYTL4,ABCA3,STIM1,MTMR2,…
3.AD/0.HA	GABA_neurons	Up	GO BP	GOBP_REGULATION_OF_NEUROTRANSMITTER_RECEPTOR_ACTIVITY	GOBP_REGULATION_OF_NEUROTRANSMITTER_RECEPTOR_ACTIVITY	1.64185	0.00412199	0.105869	SHISA6,GRIN2B,MINK1,CACNG7,CACNG2,CACNG4,SHISA9,DLGAP4,BEGAIN
3.AD/0.HA	GABA_neurons	Up	GO BP	GOBP_FOREBRAIN_CELL_MIGRATION	GOBP_FOREBRAIN_CELL_MIGRATION	1.92357	0.00422623	0.108037	SUN2,PSEN1,NR2E1,ROBO1,DISC1,BMERB1,POU3F2
3.AD/0.HA	GABA_neurons	Up	GO BP	GOBP_GLYCEROPHOSPHOLIPID_METABOLIC_PROCESS	GOBP_GLYCEROPHOSPHOLIPID_METABOLIC_PROCESS	0.935326	0.00435911	0.110913	PLCB1,NR1H4,CSF1R,PIK3R5,ITPKB,ENPP2,PIP4K2A,PLCG2,CHRM5,INPP5D,PLD1,SOCS6,ABCA3,MTMR2,PLA2G7,SLC44A1,SYNJ2,ABHD3,PLAAT3,ENPP6,SH3YL1,PIK3C2B,MTMR10,LPCAT2
3.AD/0.HA	GABA_neurons	Up	GO BP	GOBP_REGULATION_OF_DENDRITE_DEVELOPMENT	GOBP_REGULATION_OF_DENDRITE_DEVELOPMENT	1.52177	0.00441243	0.111747	PTN,CUX1,NEDD4,NR2E1,TNIK,ALK,ARMCX5-GPRASP2,IL1RAPL1,PREX1,ADGRB3
3.AD/0.HA	GABA_neurons	Up	GO BP	GOBP_CHROMATIN_DISASSEMBLY	GOBP_CHROMATIN_DISASSEMBLY	2.82816	0.00447533	0.112816	ARID2,SMARCB1,PADI2,ARID1A
3.AD/0.HA	GABA_neurons	Up	GO BP	GOBP_ENZYME_LINKED_RECEPTOR_PROTEIN_SIGNALING_PATHWAY	GOBP_ENZYME_LINKED_RECEPTOR_PROTEIN_SIGNALING_PATHWAY	0.598962	0.0046341	0.116269	MERTK,DNM2,FGFR2,PLCB1,SMAD1,NOTCH2,PPARG,PTN,TF,TXNIP,HIPK2,NEDD4,PPARA,PSEN1,NR1H4,CSF1R,SPRED2,ERBB3,ALK,ABL1,ANGPT1,GRIN2B,IRS1,NLK,PTPRJ,ROBO1,SYK,RASSF2,SMPD3,LATS2,POLR2F,WASF2,DOCK1,KANK1,GAB1,GREM1,GDF11,LOX,PIP4K2A,SORT1,MYO1E,VAV3,ONECUT1,LCP2,UBASH3B,ERBIN,LDLRAD4,SHB,ELMO1,PTPRE,HIP1,PCSK6,SH3TC2,SHC4,EFS,COL4A5,IL13RA1,LIFR
3.AD/0.HA	GABA_neurons	Up	GO BP	GOBP_PLATELET_DERIVED_GROWTH_FACTOR_RECEPTOR_SIGNALING_PATHWAY	GOBP_PLATELET_DERIVED_GROWTH_FACTOR_RECEPTOR_SIGNALING_PATHWAY	1.89219	0.00469667	0.116773	TXNIP,ABL1,PTPRJ,SMPD3,LOX,MYO1E,HIP1
3.AD/0.HA	GABA_neurons	Up	GO BP	GOBP_NEGATIVE_REGULATION_OF_ORGANELLE_ASSEMBLY	GOBP_NEGATIVE_REGULATION_OF_ORGANELLE_ASSEMBLY	2.09401	0.00474702	0.116974	DNM2,CDK5RAP2,KAT2B,CCP110,NBDY,STYXL1
3.AD/0.HA	GABA_neurons	Up	GO BP	GOBP_REGULATION_OF_ACTIN_FILAMENT_BUNDLE_ASSEMBLY	GOBP_REGULATION_OF_ACTIN_FILAMENT_BUNDLE_ASSEMBLY	1.50519	0.00474769	0.116974	RGCC,LPAR1,ABL1,SERPINF2,WASF2,DLC1,TJP1,PPM1E,LIMCH1,ARHGAP6
3.AD/0.HA	GABA_neurons	Up	GO BP	GOBP_CEREBRAL_CORTEX_RADIALLY_ORIENTED_CELL_MIGRATION	GOBP_CEREBRAL_CORTEX_RADIALLY_ORIENTED_CELL_MIGRATION	2.37396	0.00477677	0.11716	SUN2,NR2E1,DISC1,BMERB1,POU3F2
3.AD/0.HA	GABA_neurons	Up	GO BP	GOBP_AXON_EXTENSION	GOBP_AXON_EXTENSION	1.41656	0.00481638	0.117602	DNM2,ABL1,DISC1,CDH4,DSCAM,ALCAM,AUTS2,MAG,DIP2B,SEMA5A,PLXNA4
3.AD/0.HA	GABA_neurons	Up	GO BP	GOBP_REGULATION_OF_RHO_PROTEIN_SIGNAL_TRANSDUCTION	GOBP_REGULATION_OF_RHO_PROTEIN_SIGNAL_TRANSDUCTION	1.60214	0.00485087	0.117915	LPAR1,ABL1,ROBO1,DLC1,KANK1,STARD13,KCTD13,ABL2,MYO9B
3.AD/0.HA	GABA_neurons	Up	GO BP	GOBP_RESPONSE_TO_DRUG	GOBP_RESPONSE_TO_DRUG	0.928265	0.00489804	0.11828	ADA,DNMT3A,ITGA2,PPARG,PTCH1,PTN,ADIPOR2,CD38,TXNIP,NFATC2,SOX10,OGG1,COL18A1,LOX,SLC22A3,CYP2J2,VAV3,PDE4B,AIM2,ABCA3,PPM1E,ABCC4,GABRG3,CDH1,NNMT
3.AD/0.HA	GABA_neurons	Up	GO BP	GOBP_CENTRAL_NERVOUS_SYSTEM_NEURON_DIFFERENTIATION	GOBP_CENTRAL_NERVOUS_SYSTEM_NEURON_DIFFERENTIATION	1.2056	0.00490933	0.11828	FGFR2,PTCH1,SPTBN4,PSEN1,NR2E1,CSF1R,ROBO1,DISC1,ZSWIM6,PLXNA4,CLN8,NKX2-2,RORA,MDGA2,C21ORF91
3.AD/0.HA	GABA_neurons	Up	GO BP	GOBP_EXTERNAL_ENCAPSULATING_STRUCTURE_ORGANIZATION	GOBP_EXTERNAL_ENCAPSULATING_STRUCTURE_ORGANIZATION	0.895749	0.00493436	0.118359	ETS1,ITGA2,JAM3,RB1,RGCC,NR2E1,RUNX1,ABL1,SERPINF2,PHLDB1,SMPD3,GREM1,LAMA3,COL18A1,SH3PXD2B,LOX,SERPINH1,GPM6B,SMOC1,MYO1E,ADAMTS6,NID1,ADAMTS18,ADAMTS14,CDH1,PXDN,COL4A5
3.AD/0.HA	GABA_neurons	Up	GO BP	GOBP_ASTROCYTE_DIFFERENTIATION	GOBP_ASTROCYTE_DIFFERENTIATION	1.70982	0.00516269	0.122495	PSEN1,NR2E1,ABL1,MAG,POU3F2,BIN1,PLP1,NKX2-2
3.AD/0.HA	GABA_neurons	Up	GO BP	GOBP_REGULATION_OF_CELL_SUBSTRATE_JUNCTION_ORGANIZATION	GOBP_REGULATION_OF_CELL_SUBSTRATE_JUNCTION_ORGANIZATION	1.70982	0.00516269	0.122495	ABL1,PTPRJ,MAP4K4,DLC1,GREM1,GPM6B,LIMCH1,ARHGAP6
3.AD/0.HA	GABA_neurons	Up	GO BP	GOBP_NEGATIVE_REGULATION_OF_CELL_DIFFERENTIATION	GOBP_NEGATIVE_REGULATION_OF_CELL_DIFFERENTIATION	0.748723	0.00517428	0.122495	TOB2,PPARG,PTCH1,PTN,ZBTB16,CDK5RAP2,RB1,ZHX2,NFATC2,NFATC3,PAX6,PPARA,PSEN1,SOX10,NR2E1,RUNX1,ZNF536,DUSP10,SPRED2,ITPKB,KANK1,GREM1,LRP4,MAG,DIP2B,LIMD1,SEMA5A,GDF11,MEIS1,SORT1,NKX2-2,TMEM98,INPP5D,RORA,UBASH3B,NFATC1,LDLRAD4,DAAM2
3.AD/0.HA	GABA_neurons	Up	GO BP	GOBP_RHO_PROTEIN_SIGNAL_TRANSDUCTION	GOBP_RHO_PROTEIN_SIGNAL_TRANSDUCTION	1.32241	0.00535644	0.125261	LPAR1,ABL1,ROBO1,DLC1,KANK1,RHOU,STARD13,ARHGAP6,KCTD13,ABL2,ARHGAP5,MYO9B
3.AD/0.HA	GABA_neurons	Up	GO BP	GOBP_APPENDAGE_MORPHOGENESIS	GOBP_APPENDAGE_MORPHOGENESIS	1.32241	0.00535644	0.125261	FGFR2,NOTCH2,CHD7,PTCH1,ZBTB16,PSEN1,GREM1,LRP4,PLXNA2,CACNA1C,FREM2,SP8
3.AD/0.HA	GABA_neurons	Up	GO BP	GOBP_REGULATION_OF_MYELINATION	GOBP_REGULATION_OF_MYELINATION	2.05329	0.00536012	0.125261	PTN,SOX10,MAG,TMEM98,MTMR2,MYRF
3.AD/0.HA	GABA_neurons	Up	GO BP	GOBP_REGULATION_OF_RECEPTOR_MEDIATED_ENDOCYTOSIS	GOBP_REGULATION_OF_RECEPTOR_MEDIATED_ENDOCYTOSIS	1.47259	0.00547807	0.127014	DNM2,TF,ANGPT1,SYK,GREM1,PICALM,PLCG2,MTMR2,LDLRAP1,HIP1
3.AD/0.HA	GABA_neurons	Up	GO BP	GOBP_NEGATIVE_REGULATION_OF_EXECUTION_PHASE_OF_APOPTOSIS	GOBP_NEGATIVE_REGULATION_OF_EXECUTION_PHASE_OF_APOPTOSIS	2.72857	0.00549684	0.127014	BCL2L1,RFFL,DFFA,MTRNR2L8
3.AD/0.HA	GABA_neurons	Up	GO BP	GOBP_CANONICAL_WNT_SIGNALING_PATHWAY	GOBP_CANONICAL_WNT_SIGNALING_PATHWAY	0.933404	0.00550512	0.127014	FGFR2,SHISA6,FZD5,LGR5,MITF,PSEN1,SOX10,DISC1,LATS2,KANK1,GREM1,LRP4,LIMD1,SEMA5A,BICC1,NKD1,GPRC5B,RBMS3,CSNK1G1,FAM53B,DAAM2,AMER2,RNF220
3.AD/0.HA	GABA_neurons	Up	GO BP	GOBP_REGULATION_OF_SMOOTH_MUSCLE_CELL_DIFFERENTIATION	GOBP_REGULATION_OF_SMOOTH_MUSCLE_CELL_DIFFERENTIATION	2.31512	0.00555218	0.127024	FGFR2,NFATC2,NFATC3,NFATC1,OLFM2
3.AD/0.HA	GABA_neurons	Up	GO BP	GOBP_RESPONSE_TO_ACETYLCHOLINE	GOBP_RESPONSE_TO_ACETYLCHOLINE	2.31512	0.00555218	0.127024	PLCB1,CHRM5,RGS10,CHRM3,RGS8
3.AD/0.HA	GABA_neurons	Up	GO BP	GOBP_RESPONSE_TO_ORGANIC_CYCLIC_COMPOUND	GOBP_RESPONSE_TO_ORGANIC_CYCLIC_COMPOUND	0.621945	0.00566699	0.128135	ADA,DNM2,DNMT3A,ETS1,ITGA2,SMAD1,PPARG,KDM3A,PTCH1,PTN,CYP7B1,CD38,NCOR2,CRY1,TXNIP,NR3C1,NEDD4,PPARA,SOX10,NR2E1,RUNX1,NR1H4,ALK,ABL1,FBXO32,OGG1,SGK1,LOX,ESRRG,PADI2,CHRM5,NKX2-2,GSN,ITPR2,RORA,PDE4B,ABCA3,PAK4,ADCY2,SLC8A3,ABCC4,CHRM3,CACNG4,RYR3,MT-ND3,NCOA3,ARID1A,NR3C2,RFTN2,CDH1,RGS8
3.AD/0.HA	GABA_neurons	Up	GO BP	GOBP_FOCAL_ADHESION_ASSEMBLY	GOBP_FOCAL_ADHESION_ASSEMBLY	1.56349	0.00567609	0.128135	ITGA2,ABL1,PTPRJ,MAP4K4,DLC1,GREM1,GPM6B,LIMCH1,ARHGAP6
3.AD/0.HA	GABA_neurons	Up	GO BP	GOBP_NEGATIVE_REGULATION_OF_NERVOUS_SYSTEM_DEVELOPMENT	GOBP_NEGATIVE_REGULATION_OF_NERVOUS_SYSTEM_DEVELOPMENT	1.31035	0.0056862	0.128135	PTN,PAX6,PSEN1,SOX10,NR2E1,DUSP10,LRP4,MAG,DIP2B,SEMA5A,TMEM98,DAAM2
3.AD/0.HA	GABA_neurons	Up	GO BP	GOBP_NEGATIVE_REGULATION_OF_OLIGODENDROCYTE_DIFFERENTIATION	GOBP_NEGATIVE_REGULATION_OF_OLIGODENDROCYTE_DIFFERENTIATION	3.41161	0.00571368	0.128135	DUSP10,TMEM98,DAAM2
3.AD/0.HA	GABA_neurons	Up	GO BP	GOBP_PHOSPHATIDYLINOSITOL_METABOLIC_PROCESS	GOBP_PHOSPHATIDYLINOSITOL_METABOLIC_PROCESS	1.17019	0.00571844	0.128135	PLCB1,CSF1R,PIK3R5,ITPKB,PIP4K2A,PLCG2,CHRM5,INPP5D,SOCS6,MTMR2,SYNJ2,PLAAT3,SH3YL1,PIK3C2B,MTMR10
3.AD/0.HA	GABA_neurons	Up	GO BP	GOBP_SEQUESTERING_OF_CALCIUM_ION	GOBP_SEQUESTERING_OF_CALCIUM_ION	1.37494	0.00585376	0.13063	CHD7,PSEN1,RASA3,ABL1,CACNA1C,CAMK2D,PLCG2,ITPR1,ITPR2,UBASH3B,RYR3
3.AD/0.HA	GABA_neurons	Up	GO BP	GOBP_TISSUE_REMODELING	GOBP_TISSUE_REMODELING	1.24431	0.00591873	0.131541	NOTCH2,CHD7,PTN,CD38,TF,MITF,RUNX1,CSF1R,SYK,RASSF2,GREM1,LRP5L,INPP5D,UBASH3B
3.AD/0.HA	GABA_neurons	Up	GO BP	GOBP_REGULATION_OF_DEVELOPMENTAL_GROWTH	GOBP_REGULATION_OF_DEVELOPMENTAL_GROWTH	0.977707	0.00601594	0.133158	DNM2,FGFR2,PLCB1,CHD7,PTCH1,SPTBN4,PPARA,RUNX1,DUSP10,ABL1,DISC1,LATS2,CDH4,DSCAM,MAG,POU3F2,DIP2B,CACNG7,SEMA5A,PLXNA4,MEIS1,NKD1
3.AD/0.HA	GABA_neurons	Up	GO BP	GOBP_CELLULAR_RESPONSE_TO_ALCOHOL	GOBP_CELLULAR_RESPONSE_TO_ALCOHOL	1.54455	0.00612733	0.134524	DNMT3A,GLRA1,PPARG,PTCH1,SGK1,GLRA2,ITPR2,ADCY2,CDH1
3.AD/0.HA	GABA_neurons	Up	GO BP	GOBP_INTRACELLULAR_RECEPTOR_SIGNALING_PATHWAY	GOBP_INTRACELLULAR_RECEPTOR_SIGNALING_PATHWAY	1.0012	0.0061522	0.134524	PPARG,KDM3A,CYP7B1,NCOR2,CRY1,CTBP2,NR3C1,NEDD4,PPARA,NR2E1,RUNX1,ZNF536,NR1H4,PTPN22,ESRRG,PADI2,RORA,ERBIN,ARID1A,NR3C2
3.AD/0.HA	GABA_neurons	Up	GO BP	GOBP_CELL_CELL_ADHESION_VIA_PLASMA_MEMBRANE_ADHESION_MOLECULES	GOBP_CELL_CELL_ADHESION_VIA_PLASMA_MEMBRANE_ADHESION_MOLECULES	1.0012	0.0061522	0.134524	MBP,ROBO1,CDH4,CDH7,CDH8,IL1RAPL1,DSCAM,ALCAM,PALLD,CDH20,CDH19,MAG,DSCAML1,LRRC4C,CNTN2,CDH23,PCDH7,CDH1,PCDHGA1,IGSF21
3.AD/0.HA	GABA_neurons	Up	GO BP	GOBP_REGULATION_OF_SIGNALING_RECEPTOR_ACTIVITY	GOBP_REGULATION_OF_SIGNALING_RECEPTOR_ACTIVITY	1.15282	0.00619086	0.134524	SHISA6,PPARG,PPARA,PSEN1,GRIN2B,MINK1,GREM1,CACNG7,CACNG2,CACNG4,NCOA3,SHISA9,MTRNR2L8,DLGAP4,BEGAIN
3.AD/0.HA	GABA_neurons	Up	GO BP	GOBP_PEPTIDYL_TYROSINE_DEPHOSPHORYLATION	GOBP_PEPTIDYL_TYROSINE_DEPHOSPHORYLATION	1.44071	0.00629345	0.135984	CDC14B,DUSP10,PTPN22,PTPRJ,DUSP16,UBASH3B,MTMR2,PALD1,PTPN9,PTPRE
3.AD/0.HA	GABA_neurons	Up	GO BP	GOBP_POSITIVE_REGULATION_OF_STEROL_TRANSPORT	GOBP_POSITIVE_REGULATION_OF_STEROL_TRANSPORT	2.25828	0.00641231	0.137461	PTCH1,ABCA3,LDLRAP1,EEPD1,ABCA8
3.AD/0.HA	GABA_neurons	Up	GO BP	GOBP_PHOSPHATIDYLINOSITOL_DEPHOSPHORYLATION	GOBP_PHOSPHATIDYLINOSITOL_DEPHOSPHORYLATION	2.25828	0.00641231	0.137461	CHRM5,INPP5D,MTMR2,SYNJ2,MTMR10
3.AD/0.HA	GABA_neurons	Up	GO BP	GOBP_SPHINGOLIPID_METABOLIC_PROCESS	GOBP_SPHINGOLIPID_METABOLIC_PROCESS	1.21501	0.00650526	0.138364	ELOVL6,ELOVL7,SMPD3,ENPP2,UGT8,CLN8,ST6GALNAC3,ST8SIA6,ST3GAL2,LARGE1,SPTLC2,FA2H,ABCA8,CERS4
3.AD/0.HA	GABA_neurons	Up	GO BP	GOBP_APPENDAGE_DEVELOPMENT	GOBP_APPENDAGE_DEVELOPMENT	1.21501	0.00650526	0.138364	FGFR2,NOTCH2,CHD7,PTCH1,ZBTB16,PSEN1,KAT2B,GREM1,LRP4,PLXNA2,SMOC1,CACNA1C,FREM2,SP8
3.AD/0.HA	GABA_neurons	Up	GO BP	GOBP_NEGATIVE_REGULATION_OF_TISSUE_REMODELING	GOBP_NEGATIVE_REGULATION_OF_TISSUE_REMODELING	2.63564	0.00666299	0.14062	CD38,GREM1,INPP5D,UBASH3B
3.AD/0.HA	GABA_neurons	Up	GO BP	GOBP_NEGATIVE_REGULATION_OF_GLIAL_CELL_DIFFERENTIATION	GOBP_NEGATIVE_REGULATION_OF_GLIAL_CELL_DIFFERENTIATION	2.63564	0.00666299	0.14062	NR2E1,DUSP10,TMEM98,DAAM2
3.AD/0.HA	GABA_neurons	Up	GO BP	GOBP_NEGATIVE_REGULATION_OF_I_KAPPAB_KINASE_NF_KAPPAB_SIGNALING	GOBP_NEGATIVE_REGULATION_OF_I_KAPPAB_KINASE_NF_KAPPAB_SIGNALING	1.97518	0.00675709	0.141509	NR1H4,ABL1,RORA,CARD8,OTUD7A,TRIM59
3.AD/0.HA	GABA_neurons	Up	GO BP	GOBP_EXTRACELLULAR_MATRIX_ASSEMBLY	GOBP_EXTRACELLULAR_MATRIX_ASSEMBLY	1.97518	0.00675709	0.141509	RGCC,PHLDB1,SMPD3,LOX,GPM6B,PXDN
3.AD/0.HA	GABA_neurons	Up	GO BP	GOBP_RECEPTOR_METABOLIC_PROCESS	GOBP_RECEPTOR_METABOLIC_PROCESS	1.19599	0.00696536	0.145312	DNM2,NEDD4,PSEN1,ANGPT1,SYK,GREM1,CACNG7,PICALM,PLCG2,RAB31,MTMR2,CACNG2,CACNG4,LDLRAP1
3.AD/0.HA	GABA_neurons	Up	GO BP	GOBP_TRANSMEMBRANE_RECEPTOR_PROTEIN_TYROSINE_KINASE_SIGNALING_PATHWAY	GOBP_TRANSMEMBRANE_RECEPTOR_PROTEIN_TYROSINE_KINASE_SIGNALING_PATHWAY	0.667901	0.00714249	0.148438	MERTK,FGFR2,PLCB1,TXNIP,NEDD4,PSEN1,NR1H4,CSF1R,SPRED2,ERBB3,ALK,ABL1,ANGPT1,GRIN2B,IRS1,PTPRJ,ROBO1,SYK,RASSF2,SMPD3,POLR2F,WASF2,DOCK1,KANK1,GAB1,GREM1,LOX,PIP4K2A,SORT1,MYO1E,VAV3,LCP2,UBASH3B,ERBIN,SHB,ELMO1,PTPRE,HIP1,SH3TC2,SHC4,EFS,COL4A5
3.AD/0.HA	GABA_neurons	Up	GO BP	GOBP_REGULATION_OF_PHOSPHORUS_METABOLIC_PROCESS	GOBP_REGULATION_OF_PHOSPHORUS_METABOLIC_PROCESS	0.485824	0.00724154	0.149046	MERTK,FGFR2,ITGA2,PTN,SPTBN4,FZD5,ADIPOR2,TF,RB1,RGCC,TAOK3,ZBTB20,HIPK2,PPARA,PSEN1,NR1H4,DUSP10,CSF1R,CNKSR3,LPAR1,SPRED2,ERBB3,TNIK,PIK3R5,ALK,ABL1,PTPN22,ANGPT1,IKBKB,IRS1,ITPKB,MAP3K1,MINK1,PELI2,PTPRJ,ROBO1,SYK,DUSP16,MAP4K4,TRAF4,RASSF2,KAT2B,SMPD3,LATS2,CCNG2,CCNH,DLC1,DSCAM,PHACTR1,GREM1,LRP4,ENPP2,SRCIN1,GDF11,LOX,PIP4K2A,PLCL1,PRR5L,CHRM5,VAV3,LCP2,UBASH3B,SOCS6,GPRC5B,LDLRAD4,ABCA3,PA…
3.AD/0.HA	GABA_neurons	Up	GO BP	GOBP_REGULATION_OF_TISSUE_REMODELING	GOBP_REGULATION_OF_TISSUE_REMODELING	1.61784	0.00725385	0.149046	CD38,TF,RUNX1,CSF1R,SYK,GREM1,INPP5D,UBASH3B
3.AD/0.HA	GABA_neurons	Up	GO BP	GOBP_BONE_CELL_DEVELOPMENT	GOBP_BONE_CELL_DEVELOPMENT	2.20369	0.00736173	0.150694	NOTCH2,WASF2,FLI1,MEIS1,PIP4K2A
3.AD/0.HA	GABA_neurons	Up	GO BP	GOBP_COLLAGEN_BIOSYNTHETIC_PROCESS	GOBP_COLLAGEN_BIOSYNTHETIC_PROCESS	1.93767	0.0075466	0.152756	ITGA2,PPARG,RGCC,RUNX1,SERPINF2,SERPINH1
3.AD/0.HA	GABA_neurons	Up	GO BP	GOBP_REGULATION_OF_EXTRACELLULAR_MATRIX_ORGANIZATION	GOBP_REGULATION_OF_EXTRACELLULAR_MATRIX_ORGANIZATION	1.93767	0.0075466	0.152756	ETS1,RB1,RGCC,RUNX1,ABL1,PHLDB1
3.AD/0.HA	GABA_neurons	Up	GO BP	GOBP_PRESYNAPTIC_MEMBRANE_ORGANIZATION	GOBP_PRESYNAPTIC_MEMBRANE_ORGANIZATION	3.21868	0.0076315	0.153254	IL1RAPL1,LRP4,CNTN2
3.AD/0.HA	GABA_neurons	Up	GO BP	GOBP_REGULATION_OF_DENDRITIC_SPINE_MAINTENANCE	GOBP_REGULATION_OF_DENDRITIC_SPINE_MAINTENANCE	3.21868	0.0076315	0.153254	GRIN2B,ABHD17B,ZNF804A
3.AD/0.HA	GABA_neurons	Up	GO BP	GOBP_MEMBRANE_LIPID_BIOSYNTHETIC_PROCESS	GOBP_MEMBRANE_LIPID_BIOSYNTHETIC_PROCESS	1.27973	0.0077142	0.15386	ELOVL6,ELOVL7,SMPD3,UGT8,CLN8,ST6GALNAC3,ST8SIA6,ST3GAL2,LARGE1,SPTLC2,FA2H,ABCA8,CERS4
3.AD/0.HA	GABA_neurons	Up	GO BP	GOBP_NEGATIVE_REGULATION_OF_PROTEIN_MODIFICATION_PROCESS	GOBP_NEGATIVE_REGULATION_OF_PROTEIN_MODIFICATION_PROCESS	0.757757	0.00779485	0.154901	KDM3A,PTN,RB1,CRY1,TAOK3,PSEN1,DUSP10,CNKSR3,SPRED2,ABL1,PTPN22,ANGPT1,IKBKB,PTPRJ,DUSP16,RASSF2,KAT2B,LATS2,PHACTR1,GREM1,SRCIN1,SMARCB1,PRR5L,NXN,UBASH3B,LDLRAD4,PPM1E,DEPTOR,SLC8A3,ELFN1,MGAT5,STYXL1,OXR1
3.AD/0.HA	GABA_neurons	Up	GO BP	GOBP_POSITIVE_REGULATION_OF_CHOLESTEROL_EFFLUX	GOBP_POSITIVE_REGULATION_OF_CHOLESTEROL_EFFLUX	2.5478	0.00798187	0.155375	PTCH1,ABCA3,EEPD1,ABCA8
3.AD/0.HA	GABA_neurons	Up	GO BP	GOBP_NEGATIVE_REGULATION_OF_RHO_PROTEIN_SIGNAL_TRANSDUCTION	GOBP_NEGATIVE_REGULATION_OF_RHO_PROTEIN_SIGNAL_TRANSDUCTION	2.5478	0.00798187	0.155375	DLC1,KANK1,KCTD13,ABL2
3.AD/0.HA	GABA_neurons	Up	GO BP	GOBP_ACTIN_FILAMENT_BASED_TRANSPORT	GOBP_ACTIN_FILAMENT_BASED_TRANSPORT	2.5478	0.00798187	0.155375	SUN2,MYO7A,MYO1E,MYO1D
3.AD/0.HA	GABA_neurons	Up	GO BP	GOBP_NEUROTRANSMITTER_RECEPTOR_LOCALIZATION_TO_POSTSYNAPTIC_SPECIALIZATION_MEMBRANE	GOBP_NEUROTRANSMITTER_RECEPTOR_LOCALIZATION_TO_POSTSYNAPTIC_SPECIALIZATION_MEMBRANE	2.5478	0.00798187	0.155375	SHISA6,CACNG7,CACNG2,CACNG4
3.AD/0.HA	GABA_neurons	Up	GO BP	GOBP_CELL_MATRIX_ADHESION	GOBP_CELL_MATRIX_ADHESION	1.04196	0.00800795	0.155375	ITGA2,JAM3,ABL1,MINK1,PTPRJ,MAP4K4,DISC1,DLC1,GREM1,GPM6B,RIN2,NID1,ONECUT1,LIMCH1,ARHGAP6,SNED1,ITGBL1
3.AD/0.HA	GABA_neurons	Up	GO BP	GOBP_REGULATION_OF_ION_TRANSPORT	GOBP_REGULATION_OF_ION_TRANSPORT	0.528526	0.00801845	0.155375	ADA,DNM2,SHISA6,PPARG,CHD7,PTCH1,SPTBN4,FZD5,ADIPOR2,CD38,TF,CRY1,NEDD4,PPARA,PSEN1,NR1H4,CNKSR3,ABL1,ANGPT1,GRIN2B,IRS1,MINK1,SYK,UBE2J2,MTCL1,IWS1,BNIP3L,RHOU,CACNG7,LRP5L,GPM6B,CACNB2,BIN1,KCNJ3,CACNA1C,CACNA1D,CAMK2D,PLCG2,PRR5L,PLP1,ITPR1,ITPR2,MYO18A,UBASH3B,PDE4B,SYTL4,ABCA3,STIM1,DNAJC1,CHRM3,CACNG2,CACNG4,KCNIP1,KCNJ14,LDLRAP1,EEPD1,DPP6,ABCA8,KCNH8,KCNC3,KCNJ6,KCNQ3,KCNQ5,SHISA9,ZIC1,SH…
3.AD/0.HA	GABA_neurons	Up	GO BP	GOBP_HEART_DEVELOPMENT	GOBP_HEART_DEVELOPMENT	0.745723	0.00808609	0.15548	FGFR2,SMAD1,NOTCH2,PPARG,CHD7,PTCH1,PTN,ADIPOR2,ARID2,RB1,PPARA,PSEN1,RUNX1,ERBB3,ROBO1,KAT2B,DLC1,PDLIM5,GREM1,SH3PXD2B,LOX,MEIS1,CACNA1C,ADAMTS6,ANKS6,FREM2,BICC1,NFATC1,NCOA6,SGCD,RBM20,CDKL1,LDB3
3.AD/0.HA	GABA_neurons	Up	GO BP	GOBP_CEREBRAL_CORTEX_DEVELOPMENT	GOBP_CEREBRAL_CORTEX_DEVELOPMENT	1.37901	0.00820483	0.15548	PLCB1,SUN2,PSEN1,NR2E1,NDE1,ROBO1,DISC1,BMERB1,PHACTR1,POU3F2
3.AD/0.HA	GABA_neurons	Up	GO BP	GOBP_TAXIS	GOBP_TAXIS	0.694812	0.00824338	0.15548	ITGA2,NOTCH2,PTCH1,PTN,SPTBN4,JAM3,CYP7B1,CSF1R,LPAR1,ANGPT1,NCAM1,PTPRJ,ROBO1,SYK,CDH4,DSCAM,ALCAM,PALLD,GAB1,GREM1,LAMA3,ENPP2,PLXNA2,DSCAML1,PREX1,ZSWIM6,CNTN2,SEMA5A,PLXNA4,NRXN3,LOX,PADI2,VAV3,PLD1,PDE4B,CSF3R,PLA2G7,MTUS1
3.AD/0.HA	GABA_neurons	Up	GO BP	GOBP_CELL_CELL_ADHESION	GOBP_CELL_CELL_ADHESION	0.616377	0.00828071	0.15548	ADA,ETS1,ZBTB16,JAM3,RGCC,PPARA,PSEN1,RUNX1,DUSP10,ABL1,PTPN22,ITPKB,MBP,MINK1,SERPINF2,ROBO1,SYK,CDH4,CDH7,CDH8,PDLIM5,IL1RAPL1,DSCAM,ALCAM,PALLD,CDH20,CDH19,LAMA3,MAG,DSCAML1,LRRC4C,CNTN2,NRXN3,CTNNA3,ASTN2,DOCK8,ADAMTS18,MEGF10,UBASH3B,SOCS6,TJP1,CDH23,PAK4,PCDH7,CDH1,PCDHGA1,IGSF21,NINJ2,CERCAM
3.AD/0.HA	GABA_neurons	Up	GO BP	GOBP_CALCIUM_ION_TRANSPORT_INTO_CYTOSOL	GOBP_CALCIUM_ION_TRANSPORT_INTO_CYTOSOL	1.24752	0.00828086	0.15548	CHD7,RASA3,ABL1,GRIN2B,CACNA1C,CAMK2D,PLCG2,ITPR1,ITPR2,UBASH3B,SLC8A3,RYR3,FAM155A
3.AD/0.HA	GABA_neurons	Up	GO BP	GOBP_POSITIVE_REGULATION_OF_VASCULATURE_DEVELOPMENT	GOBP_POSITIVE_REGULATION_OF_VASCULATURE_DEVELOPMENT	1.24752	0.00828086	0.15548	ETS1,AGO2,SMAD1,HIPK2,NR2E1,RUNX1,ABL1,GAB1,GREM1,SEMA5A,TJP1,PAK4,STIM1
3.AD/0.HA	GABA_neurons	Up	GO BP	GOBP_B_CELL_RECEPTOR_SIGNALING_PATHWAY	GOBP_B_CELL_RECEPTOR_SIGNALING_PATHWAY	1.29488	0.00845073	0.158076	CD38,NFATC2,RUNX1,ABL1,PTPN22,SYK,PLCG2,VAV3,CD22,ELF1,ELF2
3.AD/0.HA	GABA_neurons	Up	GO BP	GOBP_RESPONSE_TO_STEROID_HORMONE	GOBP_RESPONSE_TO_STEROID_HORMONE	0.914128	0.00861662	0.160128	KDM3A,PTN,CYP7B1,CD38,NCOR2,CRY1,TXNIP,NR3C1,NEDD4,PPARA,SOX10,NR2E1,RUNX1,FBXO32,SGK1,LOX,ESRRG,PADI2,NKX2-2,ABCA3,MT-ND3,ARID1A,NR3C2
3.AD/0.HA	GABA_neurons	Up	GO BP	GOBP_REGULATION_OF_CATION_TRANSMEMBRANE_TRANSPORT	GOBP_REGULATION_OF_CATION_TRANSMEMBRANE_TRANSPORT	0.909348	0.00870421	0.161206	DNM2,SHISA6,CHD7,NEDD4,ABL1,GRIN2B,MINK1,CACNG7,CACNB2,BIN1,CACNA1C,CACNA1D,CAMK2D,PLCG2,PLP1,UBASH3B,PDE4B,STIM1,CACNG2,CACNG4,KCNIP1,DPP6,SHISA9
3.AD/0.HA	GABA_neurons	Up	GO BP	GOBP_REGULATION_OF_EPITHELIAL_CELL_MIGRATION	GOBP_REGULATION_OF_EPITHELIAL_CELL_MIGRATION	1.02087	0.00878369	0.162126	ETS1,ITGA2,PPARG,PTN,RGCC,NR2E1,DUSP10,ABL1,ANGPT1,MAP4K4,DOCK1,ENPP2,DOCK5,SEMA5A,RIN2,PLCG2,STARD13
3.AD/0.HA	GABA_neurons	Up	GO BP	GOBP_ACTIN_FILAMENT_BUNDLE_ORGANIZATION	GOBP_ACTIN_FILAMENT_BUNDLE_ORGANIZATION	1.21593	0.0090105	0.165305	RGCC,LPAR1,ABL1,SERPINF2,WASF2,DLC1,PHACTR1,TJP1,PPM1E,LIMCH1,ARHGAP6,KCTD13,AIF1L
3.AD/0.HA	GABA_neurons	Up	GO BP	GOBP_NEGATIVE_REGULATION_OF_CELL_PROJECTION_ORGANIZATION	GOBP_NEGATIVE_REGULATION_OF_CELL_PROJECTION_ORGANIZATION	1.13084	0.00904697	0.165305	DNM2,CD38,ZNF365,PSEN1,LPAR1,GRIN2B,CCP110,KANK1,LRP4,MAG,DIP2B,SEMA5A,PTPN9,DENND5A
3.AD/0.HA	GABA_neurons	Up	GO BP	GOBP_STRIATED_MUSCLE_CELL_PROLIFERATION	GOBP_STRIATED_MUSCLE_CELL_PROLIFERATION	1.69139	0.0091707	0.166974	FGFR2,SMAD1,ARID2,RUNX1,ANGPT1,MEIS1,MEGF10
3.AD/0.HA	GABA_neurons	Up	GO BP	GOBP_POSITIVE_REGULATION_OF_SMALL_GTPASE_MEDIATED_SIGNAL_TRANSDUCTION	GOBP_POSITIVE_REGULATION_OF_SMALL_GTPASE_MEDIATED_SIGNAL_TRANSDUCTION	1.55248	0.00919965	0.166974	NOTCH2,LPAR1,ITPKB,ROBO1,MAP4K4,AUTS2,ERBIN,LRRD1
3.AD/0.HA	GABA_neurons	Up	GO BP	GOBP_CELL_CELL_JUNCTION_ORGANIZATION	GOBP_CELL_CELL_JUNCTION_ORGANIZATION	1.07733	0.00928346	0.167935	FZD5,JAM3,RUNX1,NR1H4,CSF1R,IKBKB,CDH4,CDH7,CDH8,CDH20,CDH19,UGT8,MARVELD2,TJP1,CDH1,CADM2
3.AD/0.HA	GABA_neurons	Up	GO BP	GOBP_REGULATION_OF_TRANSMEMBRANE_TRANSPORT	GOBP_REGULATION_OF_TRANSMEMBRANE_TRANSPORT	0.732368	0.00932471	0.168123	DNM2,SHISA6,CHD7,ADIPOR2,NEDD4,PSEN1,ABL1,GRIN2B,IRS1,MINK1,CACNG7,CACNB2,BIN1,KCNJ3,CACNA1C,CACNA1D,CAMK2D,PLCG2,PLP1,UBASH3B,PDE4B,STIM1,CHRM3,CACNG2,CACNG4,KCNIP1,KCNJ14,DPP6,KCNH8,KCNC3,KCNJ6,KCNQ3,KCNQ5,SHISA9
3.AD/0.HA	GABA_neurons	Up	GO BP	GOBP_OSTEOCLAST_DIFFERENTIATION	GOBP_OSTEOCLAST_DIFFERENTIATION	1.43577	0.00944055	0.168903	TOB2,NOTCH2,TF,MITF,CSF1R,RASSF2,CAMK4,INPP5D,UBASH3B
3.AD/0.HA	GABA_neurons	Up	GO BP	GOBP_TELENCEPHALON_GLIAL_CELL_MIGRATION	GOBP_TELENCEPHALON_GLIAL_CELL_MIGRATION	2.46532	0.00946106	0.168903	SUN2,NR2E1,DISC1,BMERB1
3.AD/0.HA	GABA_neurons	Up	GO BP	GOBP_NEGATIVE_REGULATION_OF_POSTTRANSCRIPTIONAL_GENE_SILENCING	GOBP_NEGATIVE_REGULATION_OF_POSTTRANSCRIPTIONAL_GENE_SILENCING	2.46532	0.00946106	0.168903	PPARG,NCOR2,RMRP,NEAT1
3.AD/0.HA	GABA_neurons	Up	GO BP	GOBP_COLLAGEN_ACTIVATED_TYROSINE_KINASE_RECEPTOR_SIGNALING_PATHWAY	GOBP_COLLAGEN_ACTIVATED_TYROSINE_KINASE_RECEPTOR_SIGNALING_PATHWAY	3.04886	0.00988478	0.17473	SYK,UBASH3B,COL4A5
3.AD/0.HA	GABA_neurons	Up	GO BP	GOBP_ESTROUS_CYCLE	GOBP_ESTROUS_CYCLE	3.04886	0.00988478	0.17473	ETS1,PTN,NCOR2
3.AD/0.HA	GABA_neurons	Up	GO BP	GOBP_REGULATION_OF_VENTRICULAR_CARDIAC_MUSCLE_CELL_ACTION_POTENTIAL	GOBP_REGULATION_OF_VENTRICULAR_CARDIAC_MUSCLE_CELL_ACTION_POTENTIAL	3.04886	0.00988478	0.17473	BIN1,CTNNA3,CACNA1C
3.AD/0.HA	GABA_neurons	Up	GO BP	GOBP_REGULATION_OF_HEMOPOIESIS	GOBP_REGULATION_OF_HEMOPOIESIS	0.829192	0.00991581	0.17473	ADA,TOB2,ETS1,NOTCH2,PTN,ZBTB16,RB1,FOXO3,MITF,NFATC2,RUNX1,DUSP10,ABL1,ITPKB,SYK,RASSF2,KAT2B,LOX,MEIS1,SCIN,CAMK4,INPP5D,UBASH3B,FAXDC2,CSF3R
3.AD/0.HA	GABA_neurons	Up	GO BP	GOBP_ADULT_LOCOMOTORY_BEHAVIOR	GOBP_ADULT_LOCOMOTORY_BEHAVIOR	1.66483	0.0100013	0.175668	GLRA1,CHD7,SPTBN4,HIPK2,CNP,CLN8,OXR1
3.AD/0.HA	GABA_neurons	Up	GO BP	GOBP_NEGATIVE_REGULATION_OF_PHOSPHORYLATION	GOBP_NEGATIVE_REGULATION_OF_PHOSPHORYLATION	0.820878	0.0102422	0.179321	RB1,TAOK3,PPARA,PSEN1,DUSP10,CNKSR3,SPRED2,ABL1,PTPN22,ANGPT1,PTPRJ,DUSP16,RASSF2,KAT2B,LATS2,GREM1,SRCIN1,PIP4K2A,PRR5L,UBASH3B,LDLRAD4,PPM1E,DEPTOR,SLC8A3,CBFA2T3
3.AD/0.HA	GABA_neurons	Up	GO BP	GOBP_LYSOSOMAL_TRANSPORT	GOBP_LYSOSOMAL_TRANSPORT	1.31966	0.0105341	0.182573	NEDD4,CACNG7,KIF13A,SORT1,BIN1,LAMP2,CACNG2,CACNG4,STX8,CLEC16A
3.AD/0.HA	GABA_neurons	Up	GO BP	GOBP_MUSCLE_CELL_PROLIFERATION	GOBP_MUSCLE_CELL_PROLIFERATION	1.09475	0.0105956	0.182573	FGFR2,ITGA2,SMAD1,PPARG,ARID2,RUNX1,ANGPT1,SERPINF2,SMPD3,MEIS1,NPR3,MEGF10,ABCC4,LDLRAP1
3.AD/0.HA	GABA_neurons	Up	GO BP	GOBP_POSITIVE_REGULATION_OF_CELL_MORPHOGENESIS_INVOLVED_IN_DIFFERENTIATION	GOBP_POSITIVE_REGULATION_OF_CELL_MORPHOGENESIS_INVOLVED_IN_DIFFERENTIATION	1.51049	0.0106972	0.183743	DNM2,CUX1,ABL1,ARMCX5-GPRASP2,IL1RAPL1,DOCK1,PREX1,DOCK5
3.AD/0.HA	GABA_neurons	Up	GO BP	GOBP_POSTSYNAPTIC_SIGNAL_TRANSDUCTION	GOBP_POSTSYNAPTIC_SIGNAL_TRANSDUCTION	2.05157	0.0107893	0.184359	PLCB1,CHRM5,RGS10,CHRM3,RGS8
3.AD/0.HA	GABA_neurons	Up	GO BP	GOBP_REGULATION_OF_CELL_MORPHOGENESIS_INVOLVED_IN_DIFFERENTIATION	GOBP_REGULATION_OF_CELL_MORPHOGENESIS_INVOLVED_IN_DIFFERENTIATION	1.40124	0.0108008	0.184359	DNM2,CUX1,ABL1,ARMCX5-GPRASP2,IL1RAPL1,DOCK1,KANK1,PREX1,DOCK5
3.AD/0.HA	GABA_neurons	Up	GO BP	GOBP_REGULATION_OF_OSTEOCLAST_DIFFERENTIATION	GOBP_REGULATION_OF_OSTEOCLAST_DIFFERENTIATION	1.63875	0.0108854	0.184645	TOB2,NOTCH2,MITF,RASSF2,CAMK4,INPP5D,UBASH3B
3.AD/0.HA	GABA_neurons	Up	GO BP	GOBP_REGULATION_OF_ANTIGEN_RECEPTOR_MEDIATED_SIGNALING_PATHWAY	GOBP_REGULATION_OF_ANTIGEN_RECEPTOR_MEDIATED_SIGNALING_PATHWAY	1.63875	0.0108854	0.184645	ADA,RUNX1,PTPN22,PTPRJ,CD22,ELF1,ELF2
3.AD/0.HA	GABA_neurons	Up	GO BP	GOBP_POSITIVE_REGULATION_OF_EXTRACELLULAR_MATRIX_ORGANIZATION	GOBP_POSITIVE_REGULATION_OF_EXTRACELLULAR_MATRIX_ORGANIZATION	2.38739	0.0111076	0.187247	RB1,RGCC,RUNX1,PHLDB1
3.AD/0.HA	GABA_neurons	Up	GO BP	GOBP_EMBRYONIC_APPENDAGE_MORPHOGENESIS	GOBP_EMBRYONIC_APPENDAGE_MORPHOGENESIS	1.30523	0.0111879	0.187536	NOTCH2,CHD7,PTCH1,ZBTB16,PSEN1,GREM1,LRP4,CACNA1C,FREM2,SP8
3.AD/0.HA	GABA_neurons	Up	GO BP	GOBP_LOCOMOTORY_BEHAVIOR	GOBP_LOCOMOTORY_BEHAVIOR	1.14499	0.0113923	0.189147	GLRA1,CHD7,SPTBN4,HIPK2,ZFHX3,ALK,GPR37,CNP,DSCAM,MEIS1,CLN8,CDH23,OXR1
3.AD/0.HA	GABA_neurons	Up	GO BP	GOBP_POSITIVE_REGULATION_OF_PHAGOCYTOSIS	GOBP_POSITIVE_REGULATION_OF_PHAGOCYTOSIS	1.61313	0.0118249	0.194833	MERTK,DNM2,ITGA2,PPARG,PTPRJ,RAB31,MYO18A
3.AD/0.HA	GABA_neurons	Up	GO BP	GOBP_CALCIUM_ION_TRANSPORT	GOBP_CALCIUM_ION_TRANSPORT	0.806969	0.0118629	0.194833	CHD7,TRPC7,PSEN1,RASA3,ABL1,GRIN2B,CACNG7,SLC24A3,CACNB2,BIN1,CACNA1C,CACNA1D,CAMK2D,PLCG2,PLP1,ITPR1,ITPR2,UBASH3B,PDE4B,CDH23,SLC8A3,STIM1,CACNG2,CACNG4,RYR3,FAM155A
3.AD/0.HA	GABA_neurons	Up	GO BP	GOBP_POSITIVE_REGULATION_OF_CELLULAR_COMPONENT_ORGANIZATION	GOBP_POSITIVE_REGULATION_OF_CELLULAR_COMPONENT_ORGANIZATION	0.532803	0.0118797	0.194833	DNM2,PLCB1,ITGA2,PPARG,PTN,TF,CDK5RAP2,RB1,RGCC,CUX1,NFATC2,PSEN1,RUNX1,LPAR1,ALK,ABL1,ANGPT1,SERPINF2,PTPRJ,ROBO1,SYK,MAP4K4,PHLDB1,DISC1,CCP110,SMPD3,ANLN,CDH4,ARMCX5-GPRASP2,WASF2,IL1RAPL1,DSCAM,AUTS2,GREM1,LRP4,ENPP2,PLXNA2,ATP10A,ADGRB3,SEMA5A,PLXNA4,SMARCB1,PIP4K2A,SCIN,BIN1,PLCG2,RESF1,GSN,IQGAP2,RAB31,ABCA3,PPM1E,LIMCH1,LDLRAP1,ABL2,STYXL1,HIP1,LRRTM3,ZNF804A
3.AD/0.HA	GABA_neurons	Up	GO BP	GOBP_BONE_DEVELOPMENT	GOBP_BONE_DEVELOPMENT	1.09361	0.0120871	0.19764	FGFR2,SMAD1,NOTCH2,SMPD3,WASF2,GREM1,CHSY1,FLI1,SH3PXD2B,LOX,MEIS1,PIP4K2A,BBX,SERPINH1,LRP5L
3.AD/0.HA	GABA_neurons	Up	GO BP	GOBP_SCHWANN_CELL_DIFFERENTIATION	GOBP_SCHWANN_CELL_DIFFERENTIATION	2.00421	0.0121388	0.197891	ERBB3,POU3F2,NDRG1,FA2H,SH3TC2
3.AD/0.HA	GABA_neurons	Up	GO BP	GOBP_MUSCLE_ATROPHY	GOBP_MUSCLE_ATROPHY	2.89637	0.012484	0.201708	FOXO3,GATM,GSN
3.AD/0.HA	GABA_neurons	Up	GO BP	GOBP_POSITIVE_REGULATION_OF_PHAGOCYTOSIS_ENGULFMENT	GOBP_POSITIVE_REGULATION_OF_PHAGOCYTOSIS_ENGULFMENT	2.89637	0.012484	0.201708	ITGA2,PPARG,RAB31
3.AD/0.HA	GABA_neurons	Up	GO BP	GOBP_NEGATIVE_REGULATION_OF_PROTEIN_LOCALIZATION_TO_CELL_SURFACE	GOBP_NEGATIVE_REGULATION_OF_PROTEIN_LOCALIZATION_TO_CELL_SURFACE	2.89637	0.012484	0.201708	PICALM,GPM6B,ASTN2
3.AD/0.HA	GABA_neurons	Up	GO BP	GOBP_INTRACELLULAR_STEROID_HORMONE_RECEPTOR_SIGNALING_PATHWAY	GOBP_INTRACELLULAR_STEROID_HORMONE_RECEPTOR_SIGNALING_PATHWAY	1.27678	0.0125873	0.202176	KDM3A,CYP7B1,NCOR2,CRY1,NR3C1,NEDD4,RUNX1,PADI2,ARID1A,NR3C2
3.AD/0.HA	GABA_neurons	Up	GO BP	GOBP_REGULATION_OF_DENDRITE_MORPHOGENESIS	GOBP_REGULATION_OF_DENDRITE_MORPHOGENESIS	1.58795	0.0128215	0.204035	CUX1,NEDD4,NR2E1,TNIK,ARMCX5-GPRASP2,IL1RAPL1,ADGRB3
3.AD/0.HA	GABA_neurons	Up	GO BP	GOBP_MELANOCYTE_DIFFERENTIATION	GOBP_MELANOCYTE_DIFFERENTIATION	2.31332	0.0129278	0.204035	MITF,SOX10,MREG,LRMDA
3.AD/0.HA	GABA_neurons	Up	GO BP	GOBP_MEMBRANE_RAFT_ORGANIZATION	GOBP_MEMBRANE_RAFT_ORGANIZATION	2.31332	0.0129278	0.204035	PACSIN2,GSN,FA2H,MAL
3.AD/0.HA	GABA_neurons	Up	GO BP	GOBP_REGULATION_OF_OSTEOBLAST_PROLIFERATION	GOBP_REGULATION_OF_OSTEOBLAST_PROLIFERATION	2.31332	0.0129278	0.204035	FGFR2,ABL1,GREM1,NPR3
3.AD/0.HA	GABA_neurons	Up	GO BP	GOBP_NUCLEUS_LOCALIZATION	GOBP_NUCLEUS_LOCALIZATION	2.31332	0.0129278	0.204035	SUN2,SYNE3,BIN1,CLMN
3.AD/0.HA	GABA_neurons	Up	GO BP	GOBP_REGULATION_OF_BICELLULAR_TIGHT_JUNCTION_ASSEMBLY	GOBP_REGULATION_OF_BICELLULAR_TIGHT_JUNCTION_ASSEMBLY	2.31332	0.0129278	0.204035	FZD5,RUNX1,IKBKB,TJP1
3.AD/0.HA	GABA_neurons	Up	GO BP	GOBP_INORGANIC_ION_TRANSMEMBRANE_TRANSPORT	GOBP_INORGANIC_ION_TRANSMEMBRANE_TRANSPORT	0.579734	0.0131997	0.207724	DNM2,GLRA1,CHD7,TRPC7,SLC39A11,SLC30A6,NEDD4,PSEN1,RASA3,ABL1,GRIN2B,CACNG7,GLRA2,SLC24A3,CACNB2,SLC4A8,KCNMB2,BIN1,KCNJ3,CACNA1C,CACNA1D,CAMK2D,PLCG2,PLP1,ITPR1,ITPR2,UBASH3B,PDE4B,SLC8A3,STIM1,CACNG2,CACNG4,KCNIP1,KCNJ14,RYR3,SLC4A4,DPP6,KCNH8,SLC9A9,KCNC3,KCNJ6,KCNQ3,KCNQ5,FAM155A,ANO4,GABRG3,TTYH2
3.AD/0.HA	GABA_neurons	Up	GO BP	GOBP_REGULATION_OF_EPITHELIAL_CELL_APOPTOTIC_PROCESS	GOBP_REGULATION_OF_EPITHELIAL_CELL_APOPTOTIC_PROCESS	1.44969	0.0132716	0.207727	RGCC,PPARA,ABL1,ANGPT1,SEMA5A,SORT1,GSN,PAK4
3.AD/0.HA	GABA_neurons	Up	GO BP	GOBP_EYE_MORPHOGENESIS	GOBP_EYE_MORPHOGENESIS	1.19499	0.0133144	0.207727	NOTCH2,PTN,FZD5,ZHX2,HIPK2,PAX6,DSCAM,MYO7A,GDF11,MEIS1,MAN2A1,NKD1
3.AD/0.HA	GABA_neurons	Up	GO BP	GOBP_POSITIVE_REGULATION_OF_SYNAPTIC_TRANSMISSION	GOBP_POSITIVE_REGULATION_OF_SYNAPTIC_TRANSMISSION	1.19499	0.0133144	0.207727	PTN,NR2E1,ABL1,GRIN2B,CACNG7,CACNB2,SLC4A8,SLC8A3,CACNG2,CACNG4,KCTD13,CRHR2
3.AD/0.HA	GABA_neurons	Up	GO BP	GOBP_POSITIVE_REGULATION_OF_SIGNALING	GOBP_POSITIVE_REGULATION_OF_SIGNALING	0.435828	0.0135194	0.210323	ADA,FGFR2,PLCB1,ITGA2,NOTCH2,PTN,FZD5,LGR5,CD38,TF,TAOK3,BCL2L1,CRADD,NACC2,CTBP2,HIPK2,NEDD4,WWOX,PSEN1,NR2E1,NR1H4,CSF1R,ADRA1B,LPAR1,SPRED2,ERBB3,TNIK,PIK3R5,ALK,ABL1,PTPN22,ANGPT1,GPR37,GRIN2B,IKBKB,IRS1,ITPKB,MID1,MINK1,SERPINF2,PELI2,PTPRJ,ROBO1,SYK,MAP4K4,TRAF4,RASSF2,SIK3,DISC1,KAT2B,KANK1,GAB1,AUTS2,GREM1,CACNG7,SEMA5A,SMARCB1,GDF11,CHSY1,CACNB2,SLC4A8,PRR5L,NKD1,GPRC5B,ERBIN,LITAF,SLC8A…
3.AD/0.HA	GABA_neurons	Up	GO BP	GOBP_REGULATION_OF_ACTIN_FILAMENT_BASED_MOVEMENT	GOBP_REGULATION_OF_ACTIN_FILAMENT_BASED_MOVEMENT	1.95838	0.0135983	0.210558	BIN1,CTNNA3,CACNA1C,CAMK2D,PDE4B
3.AD/0.HA	GABA_neurons	Up	GO BP	GOBP_CELL_CELL_JUNCTION_ASSEMBLY	GOBP_CELL_CELL_JUNCTION_ASSEMBLY	1.18391	0.0137168	0.210558	FZD5,JAM3,RUNX1,NR1H4,IKBKB,CDH7,CDH8,CDH20,CDH19,UGT8,MARVELD2,TJP1
3.AD/0.HA	GABA_neurons	Up	GO BP	GOBP_ESTABLISHMENT_OF_PROTEIN_LOCALIZATION_TO_VACUOLE	GOBP_ESTABLISHMENT_OF_PROTEIN_LOCALIZATION_TO_VACUOLE	1.73057	0.0137306	0.210558	NEDD4,CACNG7,SORT1,LAMP2,CACNG2,CACNG4
3.AD/0.HA	GABA_neurons	Up	GO BP	GOBP_CARDIAC_MUSCLE_CELL_ACTION_POTENTIAL_INVOLVED_IN_CONTRACTION	GOBP_CARDIAC_MUSCLE_CELL_ACTION_POTENTIAL_INVOLVED_IN_CONTRACTION	1.73057	0.0137306	0.210558	CACNB2,BIN1,CTNNA3,KCNJ3,CACNA1C,CACNA1D
3.AD/0.HA	GABA_neurons	Up	GO BP	GOBP_GLYCOPROTEIN_BIOSYNTHETIC_PROCESS	GOBP_GLYCOPROTEIN_BIOSYNTHETIC_PROCESS	0.83807	0.0137571	0.210558	PLCB1,AGO2,PSEN1,AATF,CHSY1,ST6GALNAC3,ST8SIA6,ST3GAL2,MAN2A1,CHST15,CHST3,HS6ST2,HS6ST3,LARGE1,MGAT5,GALNT13,TMTC2,GALNT18,GALNTL6,GXYLT2,TMTC4,GALNT17
3.AD/0.HA	GABA_neurons	Up	GO BP	GOBP_WOUND_HEALING	GOBP_WOUND_HEALING	0.708807	0.0137665	0.210558	MERTK,ETS1,FGFR2,ITGA2,NOTCH2,TRPC7,RAD51B,ADIPOR2,IRF2,PPARA,DUSP10,ERBB3,PIK3R5,SERPINF2,SYK,DOCK1,KANK1,LOX,PLCG2,GSN,DOCK8,VAV3,ADAMTS18,ITPR1,ITPR2,LCP2,UBASH3B,MYOF,SYTL4,PLEC,DOCK9
3.AD/0.HA	GABA_neurons	Up	GO BP	GOBP_GLYCOSPHINGOLIPID_METABOLIC_PROCESS	GOBP_GLYCOSPHINGOLIPID_METABOLIC_PROCESS	1.5632	0.0138771	0.211544	SMPD3,UGT8,ST6GALNAC3,ST8SIA6,ST3GAL2,LARGE1,FA2H
3.AD/0.HA	GABA_neurons	Up	GO BP	GOBP_DENDRITIC_SPINE_DEVELOPMENT	GOBP_DENDRITIC_SPINE_DEVELOPMENT	1.33448	0.0139557	0.211668	ZNF365,PSEN1,LPAR1,DISC1,ARMCX5-GPRASP2,PDLIM5,SRCIN1,PAK4,C21ORF91
3.AD/0.HA	GABA_neurons	Up	GO BP	GOBP_CAMERA_TYPE_EYE_MORPHOGENESIS	GOBP_CAMERA_TYPE_EYE_MORPHOGENESIS	1.24886	0.0141145	0.213481	NOTCH2,PTN,FZD5,ZHX2,HIPK2,PAX6,DSCAM,GDF11,MEIS1,MAN2A1
3.AD/0.HA	GABA_neurons	Up	GO BP	GOBP_TELENCEPHALON_DEVELOPMENT	GOBP_TELENCEPHALON_DEVELOPMENT	1.00013	0.0142224	0.214517	PLCB1,SUN2,CHD7,PSEN1,NR2E1,NDE1,CSF1R,LPAR1,ALK,ROBO1,DISC1,BMERB1,PHACTR1,POU3F2,ZSWIM6,PLXNA4,SLC8A3
3.AD/0.HA	GABA_neurons	Up	GO BP	GOBP_CATION_TRANSMEMBRANE_TRANSPORT	GOBP_CATION_TRANSMEMBRANE_TRANSPORT	0.565584	0.0145739	0.219212	DNM2,SHISA6,CHD7,TRPC7,SLC39A11,SLC30A6,NEDD4,PSEN1,RASA3,ABL1,GRIN2B,MINK1,CACNG7,SLC24A3,CACNB2,SLC4A8,KCNMB2,BIN1,KCNJ3,CACNA1C,CACNA1D,CAMK2D,PLCG2,PLP1,ITPR1,ITPR2,UBASH3B,TMEM63A,PDE4B,SLC8A3,STIM1,CACNG2,CACNG4,KCNIP1,KCNJ14,RYR3,SLC4A4,DPP6,KCNH8,SLC25A48,SLC9A9,KCNC3,KCNJ6,KCNQ3,KCNQ5,PIEZO2,FAM155A,SHISA9
3.AD/0.HA	GABA_neurons	Up	GO BP	GOBP_POSITIVE_REGULATION_OF_RECEPTOR_INTERNALIZATION	GOBP_POSITIVE_REGULATION_OF_RECEPTOR_INTERNALIZATION	2.24269	0.0149276	0.222131	ANGPT1,SYK,GREM1,PLCG2
3.AD/0.HA	GABA_neurons	Up	GO BP	GOBP_ENDOPLASMIC_RETICULUM_CALCIUM_ION_HOMEOSTASIS	GOBP_ENDOPLASMIC_RETICULUM_CALCIUM_ION_HOMEOSTASIS	2.24269	0.0149276	0.222131	PSEN1,CAMK2D,ITPR1,TMTC4
3.AD/0.HA	GABA_neurons	Up	GO BP	GOBP_NEUROTRANSMITTER_RECEPTOR_INTERNALIZATION	GOBP_NEUROTRANSMITTER_RECEPTOR_INTERNALIZATION	2.24269	0.0149276	0.222131	DNM2,CACNG7,CACNG2,CACNG4
3.AD/0.HA	GABA_neurons	Up	GO BP	GOBP_POSITIVE_REGULATION_OF_STRESS_FIBER_ASSEMBLY	GOBP_POSITIVE_REGULATION_OF_STRESS_FIBER_ASSEMBLY	1.69878	0.0150269	0.222131	RGCC,LPAR1,ABL1,SERPINF2,PPM1E,LIMCH1
3.AD/0.HA	GABA_neurons	Up	GO BP	GOBP_WNT_SIGNALING_PATHWAY_CALCIUM_MODULATING_PATHWAY	GOBP_WNT_SIGNALING_PATHWAY_CALCIUM_MODULATING_PATHWAY	1.91364	0.0151715	0.222131	PLCB1,AGO2,FZD5,NLK,NFATC1
3.AD/0.HA	GABA_neurons	Up	GO BP	GOBP_ADIPOSE_TISSUE_DEVELOPMENT	GOBP_ADIPOSE_TISSUE_DEVELOPMENT	1.91364	0.0151715	0.222131	NR1H4,SH3PXD2B,LRP5L,SPTLC2,PLAAT3
3.AD/0.HA	GABA_neurons	Up	GO BP	GOBP_NEGATIVE_REGULATION_OF_CELL_DEVELOPMENT	GOBP_NEGATIVE_REGULATION_OF_CELL_DEVELOPMENT	1.06776	0.0154044	0.222131	PTN,PAX6,PSEN1,SOX10,NR2E1,DUSP10,KANK1,LRP4,MAG,DIP2B,SEMA5A,TMEM98,DAAM2
3.AD/0.HA	GABA_neurons	Up	GO BP	GOBP_PURINE_DEOXYRIBONUCLEOTIDE_METABOLIC_PROCESS	GOBP_PURINE_DEOXYRIBONUCLEOTIDE_METABOLIC_PROCESS	2.75908	0.015437	0.222131	ADA,SAMHD1,AK5
3.AD/0.HA	GABA_neurons	Up	GO BP	GOBP_CYCLIC_NUCLEOTIDE_CATABOLIC_PROCESS	GOBP_CYCLIC_NUCLEOTIDE_CATABOLIC_PROCESS	2.75908	0.015437	0.222131	CNP,PDE4B,PDE9A
3.AD/0.HA	GABA_neurons	Up	GO BP	GOBP_REGULATION_OF_SEQUESTERING_OF_TRIGLYCERIDE	GOBP_REGULATION_OF_SEQUESTERING_OF_TRIGLYCERIDE	2.75908	0.015437	0.222131	PPARG,PPARA,PLIN3
3.AD/0.HA	GABA_neurons	Up	GO BP	GOBP_PLATELET_DERIVED_GROWTH_FACTOR_RECEPTOR_BETA_SIGNALING_PATHWAY	GOBP_PLATELET_DERIVED_GROWTH_FACTOR_RECEPTOR_BETA_SIGNALING_PATHWAY	2.75908	0.015437	0.222131	ABL1,LOX,HIP1
3.AD/0.HA	GABA_neurons	Up	GO BP	GOBP_POST_EMBRYONIC_ANIMAL_ORGAN_DEVELOPMENT	GOBP_POST_EMBRYONIC_ANIMAL_ORGAN_DEVELOPMENT	2.75908	0.015437	0.222131	FZD5,MYO7A,MYO1E
3.AD/0.HA	GABA_neurons	Up	GO BP	GOBP_REGULATION_OF_HISTONE_H4_ACETYLATION	GOBP_REGULATION_OF_HISTONE_H4_ACETYLATION	2.75908	0.015437	0.222131	IWS1,AUTS2,SMARCB1
3.AD/0.HA	GABA_neurons	Up	GO BP	GOBP_METAL_ION_TRANSPORT	GOBP_METAL_ION_TRANSPORT	0.704193	0.0159296	0.227059	CHD7,TRPC7,SLC39A11,SLC30A6,PSEN1,RASA3,ABL1,GRIN2B,CACNG7,SLC24A3,CACNB2,BIN1,CACNA1C,CACNA1D,CAMK2D,PLCG2,PLP1,ITPR1,ITPR2,UBASH3B,PDE4B,CDH23,SLC8A3,STIM1,CACNG2,CACNG4,RYR3,SLC4A4,FAM155A
3.AD/0.HA	GABA_neurons	Up	GO BP	GOBP_CAMERA_TYPE_EYE_DEVELOPMENT	GOBP_CAMERA_TYPE_EYE_DEVELOPMENT	0.866962	0.0160962	0.228835	MERTK,NOTCH2,CHD7,PTN,FZD5,ZHX2,HIPK2,MITF,PAX6,PSEN1,NR2E1,SPRED2,DSCAM,GDF11,MEIS1,LRP5L,CLN8,CACNA1C,MAN2A1,CRYBG3,NHS
3.AD/0.HA	GABA_neurons	Up	GO BP	GOBP_INOSITOL_PHOSPHATE_MEDIATED_SIGNALING	GOBP_INOSITOL_PHOSPHATE_MEDIATED_SIGNALING	1.66767	0.0164057	0.232024	NFATC2,NFATC3,ERBB3,ITPR1,ITPR2,NFATC1
3.AD/0.HA	GABA_neurons	Up	GO BP	GOBP_CATION_TRANSPORT	GOBP_CATION_TRANSPORT	0.503958	0.0166341	0.23456	ADA,DNM2,SHISA6,CHD7,TRPC7,SPTBN4,SLC39A11,SLC30A6,TF,NEDD4,PSEN1,CNKSR3,RASA3,ABL1,GRIN2B,MINK1,SYK,CACNG7,SGK1,GPM6B,SLC24A3,SLC22A3,CACNB2,SLC4A8,KCNMB2,BIN1,KCNJ3,CACNA1C,CACNA1D,CAMK2D,PLCG2,PLP1,CHRM5,ITPR1,ITPR2,UBASH3B,TMEM63A,PDE4B,CDH23,SLC8A3,STIM1,CACNG2,SLC44A1,CACNG4,KCNIP1,KCNJ14,RYR3,SLC4A4,DPP6,SLC5A11,KCNH8,SLC25A48,SLC9A9,KCNC3,KCNJ6,KCNQ3,KCNQ5,PIEZO2,FAM155A,SHISA9
3.AD/0.HA	GABA_neurons	Up	GO BP	GOBP_BEHAVIOR	GOBP_BEHAVIOR	0.672221	0.0166712	0.23456	ADA,PLCB1,GLRA1,CHD7,PTN,SPTBN4,HIPK2,ZFHX3,PPARA,PSEN1,NR2E1,ALK,GPR37,GRIN2B,CNP,ARMCX5-GPRASP2,DSCAM,ADGRB3,SGK1,PICALM,NRXN3,MEIS1,CLN8,GATM,CAMK4,CDH23,SLC8A3,ABL2,OXR1,TANC1,SORCS3,C3ORF70
3.AD/0.HA	GABA_neurons	Up	GO BP	GOBP_CERAMIDE_METABOLIC_PROCESS	GOBP_CERAMIDE_METABOLIC_PROCESS	1.28643	0.0167348	0.234848	SMPD3,UGT8,CLN8,ST6GALNAC3,ST8SIA6,ST3GAL2,SPTLC2,FA2H,CERS4
3.AD/0.HA	GABA_neurons	Up	GO BP	GOBP_MAINTENANCE_OF_LOCATION_IN_CELL	GOBP_MAINTENANCE_OF_LOCATION_IN_CELL	0.981919	0.0168689	0.235516	SUN2,CHD7,PSEN1,RASA3,ABL1,SCIN,GRIK5,CACNA1C,CAMK2D,PLCG2,GSN,ITPR1,ITPR2,UBASH3B,RYR3
3.AD/0.HA	GABA_neurons	Up	GO BP	GOBP_NEGATIVE_REGULATION_OF_GENE_SILENCING	GOBP_NEGATIVE_REGULATION_OF_GENE_SILENCING	2.17549	0.0171123	0.237695	PPARG,NCOR2,RMRP,NEAT1
3.AD/0.HA	GABA_neurons	Up	GO BP	GOBP_REGULATION_OF_CARDIAC_MUSCLE_CELL_ACTION_POTENTIAL	GOBP_REGULATION_OF_CARDIAC_MUSCLE_CELL_ACTION_POTENTIAL	2.17549	0.0171123	0.237695	BIN1,CTNNA3,CACNA1C,CAMK2D
3.AD/0.HA	GABA_neurons	Up	GO BP	GOBP_REGULATION_OF_JNK_CASCADE	GOBP_REGULATION_OF_JNK_CASCADE	1.23143	0.0173647	0.24002	PLCB1,TAOK3,HIPK2,DUSP10,PHLPP1,PTPN22,MINK1,SERPINF2,MAP4K4,TRAF4,RASSF2
3.AD/0.HA	GABA_neurons	Up	GO BP	GOBP_NEURON_PROJECTION_GUIDANCE	GOBP_NEURON_PROJECTION_GUIDANCE	0.878965	0.0173679	0.24002	NOTCH2,PTCH1,SPTBN4,CSF1R,NCAM1,ROBO1,CDH4,DSCAM,ALCAM,PALLD,GAB1,LAMA3,PLXNA2,DSCAML1,ZSWIM6,CNTN2,SEMA5A,PLXNA4,NRXN3
3.AD/0.HA	GABA_neurons	Up	GO BP	GOBP_TISSUE_REGENERATION	GOBP_TISSUE_REGENERATION	1.49139	0.0174154	0.240068	PTN,RUNX1,DUSP10,GSN,LARGE1,CPQ,NINJ2
3.AD/0.HA	GABA_neurons	Up	GO BP	GOBP_NEGATIVE_REGULATION_OF_NEURON_PROJECTION_DEVELOPMENT	GOBP_NEGATIVE_REGULATION_OF_NEURON_PROJECTION_DEVELOPMENT	1.2069	0.0181832	0.249389	CD38,ZNF365,PSEN1,LPAR1,KANK1,LRP4,MAG,DIP2B,SEMA5A,PTPN9,DENND5A
3.AD/0.HA	GABA_neurons	Down	GO BP	GOBP_COTRANSLATIONAL_PROTEIN_TARGETING_TO_MEMBRANE	GOBP_COTRANSLATIONAL_PROTEIN_TARGETING_TO_MEMBRANE	6.04411	9.26057e-82	5.04238e-78	RPL29,RPS6,RPL3,RPL5,RPL6,RPL10,RPL11,RPL23A,RPL24,RPL38,RPLP0,RPSA,RPS5,RPS10,RPS14,RPS15,RPS27,RPS28,RPL26,RPS27A,UBA52,RPL23,RPS3,RPL35,RPL13A,RPL36,RPL10A,RPL4,RPL7,RPL7A,RPL8,RPL9,RPL12,RPL13,RPL15,RPL17,RPL18,RPL18A,RPL19,RPL21,RPL22,RPL27,RPL30,RPL28,RPL31,RPL32,RPL34,RPL35A,RPL37,RPL37A,RPL39,RPL41,RPL36A,RPLP1,RPLP2,RPS2,RPS3A,RPS4X,RPS7,RPS8,RPS9,RPS12,RPS13,RPS15A,RPS16,RPS17,RPS18,RPS…
3.AD/0.HA	GABA_neurons	Down	GO BP	GOBP_ESTABLISHMENT_OF_PROTEIN_LOCALIZATION_TO_ENDOPLASMIC_RETICULUM	GOBP_ESTABLISHMENT_OF_PROTEIN_LOCALIZATION_TO_ENDOPLASMIC_RETICULUM	5.43907	5.98778e-76	1.63017e-72	RPL29,RPS6,RPL3,RPL5,RPL6,RPL10,RPL11,RPL23A,RPL24,RPL38,RPLP0,RPSA,RPS5,RPS10,RPS14,RPS15,RPS27,RPS28,RPL26,RPS27A,UBA52,RPL23,RPS3,RPL35,RPL13A,RPL36,RPL10A,RPL4,RPL7,RPL7A,RPL8,RPL9,RPL12,RPL13,RPL15,RPL17,RPL18,RPL18A,RPL19,RPL21,RPL22,RPL27,RPL30,RPL28,RPL31,RPL32,RPL34,RPL35A,RPL37,RPL37A,RPL39,RPL41,RPL36A,RPLP1,RPLP2,RPS2,RPS3A,RPS4X,RPS7,RPS8,RPS9,RPS12,RPS13,RPS15A,RPS16,RPS17,RPS18,RPS…
3.AD/0.HA	GABA_neurons	Down	GO BP	GOBP_PROTEIN_LOCALIZATION_TO_ENDOPLASMIC_RETICULUM	GOBP_PROTEIN_LOCALIZATION_TO_ENDOPLASMIC_RETICULUM	4.85964	2.1208e-72	3.84926e-69	BCAP31,RPL29,RPS6,RPL3,RPL5,RPL6,RPL10,RPL11,RPL23A,RPL24,RPL38,RPLP0,RPSA,RPS5,RPS10,RPS14,RPS15,RPS27,RPS28,RPL26,RPS27A,UBA52,RPL23,RPS3,RPL35,RPL13A,RPL36,RPL10A,RPL4,RPL7,RPL7A,RPL8,RPL9,RPL12,RPL13,RPL15,RPL17,RPL18,RPL18A,RPL19,RPL21,RPL22,RPL27,RPL30,RPL28,RPL31,RPL32,RPL34,RPL35A,RPL37,RPL37A,RPL39,RPL41,RPL36A,RPLP1,RPLP2,RPS2,RPS3A,RPS4X,RPS7,RPS8,RPS9,RPS12,RPS13,RPS15A,RPS16,RPS17,RP…
3.AD/0.HA	GABA_neurons	Down	GO BP	GOBP_NUCLEAR_TRANSCRIBED_MRNA_CATABOLIC_PROCESS_NONSENSE_MEDIATED_DECAY	GOBP_NUCLEAR_TRANSCRIBED_MRNA_CATABOLIC_PROCESS_NONSENSE_MEDIATED_DECAY	4.92725	1.23208e-62	1.67717e-59	RPL29,RPS6,RPL3,RPL5,RPL6,RPL10,RPL11,RPL23A,RPL24,RPL38,RPLP0,RPSA,RPS5,RPS10,RPS14,RPS15,RPS27,RPS28,RPL26,RPS27A,UBA52,RPL23,RPS3,RPL35,RPL13A,RPL36,RPL10A,RPL4,RPL7,RPL7A,RPL8,RPL9,RPL12,RPL13,RPL15,RPL17,RPL18,RPL18A,RPL19,RPL21,RPL22,RPL27,RPL30,RPL28,RPL31,RPL32,RPL34,RPL35A,RPL37,RPL37A,RPL39,RPL41,RPL36A,RPLP1,RPLP2,RPS2,RPS3A,RPS4X,RPS7,RPS8,RPS9,RPS12,RPS13,RPS15A,RPS16,RPS17,RPS18,RPS…
3.AD/0.HA	GABA_neurons	Down	GO BP	GOBP_PROTEIN_TARGETING_TO_MEMBRANE	GOBP_PROTEIN_TARGETING_TO_MEMBRANE	3.88526	4.05088e-57	4.41141e-54	RPL29,RPS6,RPL3,RPL5,RPL6,RPL10,RPL11,RPL23A,RPL24,RPL38,RPLP0,RPSA,RPS5,RPS10,RPS14,RPS15,RPS27,RPS28,RPL26,CDK5,RPS27A,UBA52,RPL23,RPS3,RPL35,RPL13A,RPL36,RPL10A,RPL4,RPL7,RPL7A,RPL8,RPL9,RPL12,RPL13,RPL15,RPL17,RPL18,RPL18A,RPL19,RPL21,RPL22,RPL27,RPL30,RPL28,RPL31,RPL32,RPL34,RPL35A,RPL37,RPL37A,RPL39,RPL41,RPL36A,RPLP1,RPLP2,RPS2,RPS3A,RPS4X,RPS7,RPS8,RPS9,RPS12,RPS13,RPS15A,RPS16,RPS17,RPS1…
3.AD/0.HA	GABA_neurons	Down	GO BP	GOBP_VIRAL_GENE_EXPRESSION	GOBP_VIRAL_GENE_EXPRESSION	3.70651	3.21473e-49	2.91737e-46	RPL29,RPS6,AAAS,RPL3,RPL5,RPL6,RPL10,RPL11,RPL23A,RPL24,RPL38,RPLP0,RPSA,RPS5,RPS10,RPS14,RPS15,RPS27,RPS28,RPL26,RPS27A,UBA52,RPL23,RPS3,RPL35,RPL13A,RPL36,RPL10A,RPL4,RPL7,RPL7A,RPL8,RPL9,RPL12,RPL13,RPL15,RPL17,RPL18,RPL18A,RPL19,RPL21,RPL22,RPL27,RPL30,RPL28,RPL31,RPL32,RPL34,RPL35A,RPL37,RPL37A,RPL39,RPL41,RPL36A,RPLP1,RPLP2,RPS2,RPS3A,RPS4X,RPS7,RPS8,RPS9,RPS12,RPS13,RPS15A,RPS16,RPS17,RPS1…
3.AD/0.HA	GABA_neurons	Down	GO BP	GOBP_ESTABLISHMENT_OF_PROTEIN_LOCALIZATION_TO_MEMBRANE	GOBP_ESTABLISHMENT_OF_PROTEIN_LOCALIZATION_TO_MEMBRANE	3.07101	5.06646e-49	3.94098e-46	RPL29,RPS6,RPL3,RPL5,RPL6,RPL10,RPL11,RPL23A,RPL24,RPL38,RPLP0,RPSA,RPS5,RPS10,RPS14,RPS15,RPS27,RPS28,RPL26,CDK5,RPS27A,UBA52,RPL23,EMC10,RPS3,YWHAB,CALM1,RPL35,RPL13A,RPL36,RPL10A,RPL4,RPL7,RPL7A,RPL8,RPL9,RPL12,RPL13,RPL15,RPL17,RPL18,RPL18A,RPL19,RPL21,RPL22,RPL27,RPL30,RPL28,RPL31,RPL32,RPL34,RPL35A,RPL37,RPL37A,RPL39,RPL41,RPL36A,RPLP1,RPLP2,RPS2,RPS3A,RPS4X,RPS7,RPS8,RPS9,RPS12,RPS13,RPS15…
3.AD/0.HA	GABA_neurons	Down	GO BP	GOBP_PROTEIN_TARGETING	GOBP_PROTEIN_TARGETING	2.84152	2.15774e-48	1.46861e-45	BCAP31,DNAJC19,RPL29,RPS6,UBB,RPL3,RPL5,RPL6,RPL10,RPL11,RPL23A,RPL24,RPL38,RPLP0,RPSA,RPS5,RPS10,RPS14,RPS15,RPS27,RPS28,ACOT4,RPL26,CDK5,RPS27A,UBA52,UBC,RPL23,PRKAA1,RPS3,PINK1,YWHAB,RPL35,RPL13A,RPL36,RPL10A,RPL4,RPL7,RPL7A,RPL8,RPL9,RPL12,RPL13,RPL15,RPL17,RPL18,RPL18A,RPL19,RPL21,RPL22,RPL27,RPL30,RPL28,RPL31,RPL32,RPL34,RPL35A,RPL37,RPL37A,RPL39,RPL41,RPL36A,RPLP1,RPLP2,RPS2,RPS3A,RPS4X,RP…
3.AD/0.HA	GABA_neurons	Down	GO BP	GOBP_TRANSLATIONAL_INITIATION	GOBP_TRANSLATIONAL_INITIATION	3.70303	5.56605e-48	3.36746e-45	RPL29,RPS6,RPL3,RPL5,RPL6,RPL10,RPL11,RPL23A,RPL24,RPL38,RPLP0,RPSA,RPS5,RPS10,RPS14,RPS15,RPS27,RPS28,RPL26,RPS27A,UBA52,RPL23,RPS3,RPL35,RPL13A,RPL36,RPL10A,RPL4,RPL7,RPL7A,RPL8,RPL9,RPL12,RPL13,RPL15,RPL17,RPL18,RPL18A,RPL19,RPL21,RPL22,RPL27,RPL30,RPL28,RPL31,RPL32,RPL34,RPL35A,RPL37,RPL37A,RPL39,RPL41,RPL36A,RPLP1,RPLP2,RPS2,RPS3A,RPS4X,RPS7,RPS8,RPS9,RPS12,RPS13,RPS15A,RPS16,RPS17,RPS18,RPS…
3.AD/0.HA	GABA_neurons	Down	GO BP	GOBP_NUCLEAR_TRANSCRIBED_MRNA_CATABOLIC_PROCESS	GOBP_NUCLEAR_TRANSCRIBED_MRNA_CATABOLIC_PROCESS	3.44177	3.57926e-42	1.9489e-39	RPL29,RPS6,RPL3,RPL5,RPL6,RPL10,RPL11,RPL23A,RPL24,RPL38,RPLP0,RPSA,RPS5,RPS10,RPS14,RPS15,RPS27,RPS28,RPL26,RPS27A,UBA52,RPL23,RPS3,RPL35,RPL13A,RPL36,RPL10A,RPL4,RPL7,RPL7A,RPL8,RPL9,RPL12,RPL13,RPL15,RPL17,RPL18,RPL18A,RPL19,RPL21,RPL22,RPL27,RPL30,RPL28,RPL31,RPL32,RPL34,RPL35A,RPL37,RPL37A,RPL39,RPL41,RPL36A,RPLP1,RPLP2,RPS2,RPS3A,RPS4X,RPS7,RPS8,RPS9,RPS12,RPS13,RPS15A,RPS16,RPS17,RPS18,RPS…
3.AD/0.HA	GABA_neurons	Down	GO BP	GOBP_ESTABLISHMENT_OF_PROTEIN_LOCALIZATION_TO_ORGANELLE	GOBP_ESTABLISHMENT_OF_PROTEIN_LOCALIZATION_TO_ORGANELLE	2.37438	3.25189e-38	1.60969e-35	BCAP31,DNAJC19,HSP90AB1,RPL29,RPS6,UBB,RPL3,RPL5,RPL6,RPL10,RPL11,RPL23A,RPL24,RPL38,RPLP0,RPSA,RPS5,RPS10,RPS14,RPS15,RPS27,RPS28,ACOT4,RPL26,RPS27A,UBA52,UBC,RPL23,PRKAA1,RPS3,PINK1,YWHAB,CALM1,RPL35,RPL13A,RPL36,RPL10A,RPL4,RPL7,RPL7A,RPL8,RPL9,RPL12,RPL13,RPL15,RPL17,RPL18,RPL18A,RPL19,RPL21,RPL22,RPL27,RPL30,RPL28,RPL31,RPL32,RPL34,RPL35A,RPL37,RPL37A,RPL39,RPL41,RPL36A,RPLP1,RPLP2,RPS2,RPS3…
3.AD/0.HA	GABA_neurons	Down	GO BP	GOBP_OXIDATIVE_PHOSPHORYLATION	GOBP_OXIDATIVE_PHOSPHORYLATION	3.75587	6.35064e-38	2.8816e-35	PARK7,DLD,ISCU,PINK1,PPIF,CHCHD10,STOML2,NDUFC2,COX7A1,COX7A2,NDUFAB1,ATP5PD,UQCR11,NDUFA11,COX4I1,COX5B,COX6A1,COX6B1,COX6C,COX7B,COX7C,COX8A,COX15,CYC1,UQCRQ,UQCR10,NDUFS7,NDUFA1,NDUFA4,NDUFA5,NDUFA6,NDUFA7,NDUFB3,NDUFB5,NDUFB8,NDUFB9,NDUFB10,NDUFS3,NDUFV1,NDUFS5,NDUFS6,NDUFS8,NDUFA13,CHCHD2,ATP5F1D,ATP5F1E,ATP5MC1,ATP5MC2,ATP5MC3,ATP5ME,ATP5PF,ATP5PO,NDUFB11,NDUFA12,UQCRB,UQCRFS1,UQCC3,COX5A,A…
3.AD/0.HA	GABA_neurons	Down	GO BP	GOBP_RNA_CATABOLIC_PROCESS	GOBP_RNA_CATABOLIC_PROCESS	2.45592	6.46358e-32	2.70725e-29	MEIOC,DND1,RPL29,RPS6,UBB,RPL3,RPL5,RPL6,RPL10,RPL11,RPL23A,RPL24,RPL38,RPLP0,RPSA,RPS5,RPS10,RPS14,RPS15,RPS27,RPS28,RPL26,RPS27A,UBA52,UBC,RPL23,PSMA3,PSMA7,PSMB1,PSMB6,PSMB10,PSME1,RPS3,YWHAB,RPL35,RPL13A,RPL36,RPL10A,RPL4,RPL7,RPL7A,RPL8,RPL9,RPL12,RPL13,RPL15,RPL17,RPL18,RPL18A,RPL19,RPL21,RPL22,RPL27,RPL30,RPL28,RPL31,RPL32,RPL34,RPL35A,RPL37,RPL37A,RPL39,RPL41,RPL36A,RPLP1,RPLP2,RPS2,RPS3A…
3.AD/0.HA	GABA_neurons	Down	GO BP	GOBP_BIOLOGICAL_PROCESS_INVOLVED_IN_SYMBIOTIC_INTERACTION	GOBP_BIOLOGICAL_PROCESS_INVOLVED_IN_SYMBIOTIC_INTERACTION	1.82976	2.18584e-31	8.50135e-29	SLC25A4,BCAP31,HSP90AB1,NBN,RPL29,RPS6,UBB,AAAS,DYNLL1,RPL3,RPL5,RPL6,RPL10,RPL11,RPL23A,RPL24,RPL38,RPLP0,RPSA,RPS5,RPS10,RPS14,RPS15,RPS27,RPS28,ATP6V0C,B2M,RPL26,CDK5RAP3,KAT5,PPID,RPS27A,STAT1,UBA52,UBC,RPL23,FN1,PPIA,PSMA3,PSMA7,PSMB1,PSMB6,PSMB10,RPS3,SKP1,YWHAB,CALM1,PABPN1,CD81,RPL35,RPL13A,RPL36,RPL10A,RPL4,RPL7,RPL7A,RPL8,RPL9,RPL12,RPL13,RPL15,RPL17,RPL18,RPL18A,RPL19,RPL21,RPL22,RPL27…
3.AD/0.HA	GABA_neurons	Down	GO BP	GOBP_PEPTIDE_METABOLIC_PROCESS	GOBP_PEPTIDE_METABOLIC_PROCESS	1.96024	5.55801e-31	2.01756e-28	PARK7,IGFBP5,DND1,RPL29,RPS6,SOD1,RPL3,RPL5,RPL6,RPL10,RPL11,RPL23A,RPL24,RPL38,RPLP0,RPSA,RPS5,RPS10,RPS14,RPS15,RPS27,RPS28,RPL26,RPS27A,UBA52,RPL23,TRMT112,RPUSD4,ATP6AP2,ARL6IP5,GSTP1,PIN1,RPS3,PINK1,THBS1,RPL35,RPL13A,RPL36,RPL10A,RPL4,RPL7,RPL7A,RPL8,RPL9,RPL12,RPL13,RPL15,RPL17,RPL18,RPL18A,RPL19,RPL21,RPL22,RPL27,RPL30,RPL28,RPL31,RPL32,RPL34,RPL35A,RPL37,RPL37A,RPL39,RPL41,RPL36A,RPLP1,R…
3.AD/0.HA	GABA_neurons	Down	GO BP	GOBP_ATP_SYNTHESIS_COUPLED_ELECTRON_TRANSPORT	GOBP_ATP_SYNTHESIS_COUPLED_ELECTRON_TRANSPORT	4.00019	6.1092e-31	2.07904e-28	PARK7,DLD,ISCU,PINK1,NDUFC2,NDUFAB1,UQCR11,NDUFA11,COX4I1,COX5B,COX6A1,COX6B1,COX6C,COX7B,COX7C,COX8A,COX15,CYC1,UQCRQ,UQCR10,NDUFS7,NDUFA1,NDUFA4,NDUFA5,NDUFA6,NDUFA7,NDUFB3,NDUFB5,NDUFB8,NDUFB9,NDUFB10,NDUFS3,NDUFV1,NDUFS5,NDUFS6,NDUFS8,NDUFA13,CHCHD2,NDUFB11,NDUFA12,UQCRB,UQCRFS1,UQCC3,COX5A
3.AD/0.HA	GABA_neurons	Down	GO BP	GOBP_PEPTIDE_BIOSYNTHETIC_PROCESS	GOBP_PEPTIDE_BIOSYNTHETIC_PROCESS	2.09298	1.15459e-30	3.69809e-28	IGFBP5,DND1,RPL29,RPS6,RPL3,RPL5,RPL6,RPL10,RPL11,RPL23A,RPL24,RPL38,RPLP0,RPSA,RPS5,RPS10,RPS14,RPS15,RPS27,RPS28,RPL26,RPS27A,UBA52,RPL23,TRMT112,RPUSD4,RPS3,PINK1,THBS1,RPL35,RPL13A,RPL36,RPL10A,RPL4,RPL7,RPL7A,RPL8,RPL9,RPL12,RPL13,RPL15,RPL17,RPL18,RPL18A,RPL19,RPL21,RPL22,RPL27,RPL30,RPL28,RPL31,RPL32,RPL34,RPL35A,RPL37,RPL37A,RPL39,RPL41,RPL36A,RPLP1,RPLP2,RPS2,RPS3A,RPS4X,RPS7,RPS8,RPS9,R…
3.AD/0.HA	GABA_neurons	Down	GO BP	GOBP_ATP_METABOLIC_PROCESS	GOBP_ATP_METABOLIC_PROCESS	2.6575	3.18904e-30	9.64683e-28	PARK7,DLD,AAAS,ISCU,ATP6V1B2,ATP6V0C,ENO1,PRKAA1,PINK1,GAPDH,PGM2L1,PPIF,HSPA8,ATP5IF1,CHCHD10,ATP1B1,ALDOC,STOML2,NDUFC2,PGAM1,COX7A1,COX7A2,ENO2,PFKM,TPI1,NDUFAB1,ATP5PD,UQCR11,NDUFA11,COX4I1,COX5B,COX6A1,COX6B1,COX6C,COX7B,COX7C,COX8A,COX15,CYC1,UQCRQ,UQCR10,NDUFS7,NDUFA1,NDUFA4,NDUFA5,NDUFA6,NDUFA7,NDUFB3,NDUFB5,NDUFB8,NDUFB9,NDUFB10,NDUFS3,NDUFV1,NDUFS5,NDUFS6,NDUFS8,NDUFA13,CHCHD2,ATP5F1D,A…
3.AD/0.HA	GABA_neurons	Down	GO BP	GOBP_PROTEIN_LOCALIZATION_TO_MEMBRANE	GOBP_PROTEIN_LOCALIZATION_TO_MEMBRANE	2.05369	8.51111e-30	2.43911e-27	RAB3A,RPL29,RPS6,RPL3,RPL5,RPL6,RPL10,RPL11,RPL23A,RPL24,RPL38,RPLP0,RPSA,RPS5,RPS10,RPS14,RPS15,RPS27,RPS28,RPL26,CDK5,RPS27A,UBA52,RPL23,ARL6IP5,EMC10,RPS3,YWHAB,CALM1,CD81,RPL35,RPL13A,RPL36,RPL10A,RPL4,RPL7,RPL7A,RPL8,RPL9,RPL12,RPL13,RPL15,RPL17,RPL18,RPL18A,RPL19,RPL21,RPL22,RPL27,RPL30,RPL28,RPL31,RPL32,RPL34,RPL35A,RPL37,RPL37A,RPL39,RPL41,RPL36A,RPLP1,RPLP2,RPS2,RPS3A,RPS4X,RPS7,RPS8,RPS…
3.AD/0.HA	GABA_neurons	Down	GO BP	GOBP_INTRACELLULAR_PROTEIN_TRANSPORT	GOBP_INTRACELLULAR_PROTEIN_TRANSPORT	1.69593	2.01526e-29	5.48655e-27	BCAP31,PARK7,DNAJC19,HSP90AB1,MAK,RPL29,RPS6,UBB,AAAS,DYNLL1,RPL3,RPL5,RPL6,RPL10,RPL11,RPL23A,RPL24,RPL38,RPLP0,RPSA,RPS5,RPS10,RPS14,RPS15,RPS27,RPS28,ACOT4,RPL26,CDK5,RPS27A,TXN,UBA52,UBC,RPL23,ERP29,STRADB,PRKAA1,RPS3,PINK1,YWHAB,PABPN1,CD81,RPL35,RPL13A,RPL36,RPL10A,RPL4,RPL7,RPL7A,RPL8,RPL9,RPL12,RPL13,RPL15,RPL17,RPL18,RPL18A,RPL19,RPL21,RPL22,RPL27,RPL30,RPL28,RPL31,RPL32,RPL34,RPL35A,RPL…
3.AD/0.HA	GABA_neurons	Down	GO BP	GOBP_AMIDE_BIOSYNTHETIC_PROCESS	GOBP_AMIDE_BIOSYNTHETIC_PROCESS	1.911	9.17075e-29	2.37784e-26	DLD,IGFBP5,CCN1,DND1,RPL29,RPS6,RPL3,RPL5,RPL6,RPL10,RPL11,RPL23A,RPL24,RPL38,RPLP0,RPSA,RPS5,RPS10,RPS14,RPS15,RPS27,RPS28,TECR,RPL26,RPS27A,UBA52,RPL23,TRMT112,RPUSD4,PRKAA1,RPS3,PINK1,THBS1,RPL35,RPL13A,RPL36,RPL10A,RPL4,RPL7,RPL7A,RPL8,RPL9,RPL12,RPL13,RPL15,RPL17,RPL18,RPL18A,RPL19,RPL21,RPL22,RPL27,RPL30,RPL28,RPL31,RPL32,RPL34,RPL35A,RPL37,RPL37A,RPL39,RPL41,RPL36A,RPLP1,RPLP2,RPS2,RPS3A,R…
3.AD/0.HA	GABA_neurons	Down	GO BP	GOBP_PROTEIN_LOCALIZATION_TO_ORGANELLE	GOBP_PROTEIN_LOCALIZATION_TO_ORGANELLE	1.76059	1.13563e-28	2.81069e-26	BCAP31,PARK7,DNAJC19,HSP90AB1,RPL29,RPS6,UBB,TERF2IP,RPL3,RPL5,RPL6,RPL10,RPL11,RPL23A,RPL24,RPL38,RPLP0,RPSA,RPS5,RPS10,RPS14,RPS15,RPS27,RPS28,ACOT4,ZWILCH,RPL26,CDK5RAP3,CDK5,RPS27A,TXN,UBA52,UBC,RPL23,EMC10,PIN1,PRKAA1,RPS3,SKP1,PINK1,YWHAB,CALM1,CD81,RPL35,RPL13A,RPL36,RPL10A,RPL4,RPL7,RPL7A,RPL8,RPL9,RPL12,RPL13,RPL15,RPL17,RPL18,RPL18A,RPL19,RPL21,RPL22,RPL27,RPL30,RPL28,RPL31,RPL32,RPL34,…
3.AD/0.HA	GABA_neurons	Down	GO BP	GOBP_RESPIRATORY_ELECTRON_TRANSPORT_CHAIN	GOBP_RESPIRATORY_ELECTRON_TRANSPORT_CHAIN	3.64613	2.22899e-28	5.27689e-26	PARK7,DLD,ISCU,PINK1,NDUFC2,ETFDH,NDUFAB1,UQCR11,NDUFA11,COX4I1,COX5B,COX6A1,COX6B1,COX6C,COX7B,COX7C,COX8A,COX15,CYC1,UQCRQ,UQCR10,NDUFS7,NDUFA1,NDUFA4,NDUFA5,NDUFA6,NDUFA7,NDUFB3,NDUFB5,NDUFB8,NDUFB9,NDUFB10,NDUFS3,NDUFV1,NDUFS5,NDUFS6,NDUFS8,NDUFA13,CHCHD2,NDUFB11,NDUFA12,UQCRB,UQCRFS1,UQCC3,COX5A
3.AD/0.HA	GABA_neurons	Down	GO BP	GOBP_INTRACELLULAR_TRANSPORT	GOBP_INTRACELLULAR_TRANSPORT	1.44807	2.44452e-27	5.54601e-25	BCAP31,PARK7,DNAJC19,HSP90AB1,MAK,RPL29,RPS6,SOD1,UBB,AAAS,DYNLL1,RPL3,RPL5,RPL6,RPL10,RPL11,RPL23A,RPL24,RPL38,RPLP0,RPSA,RPS5,RPS10,RPS14,RPS15,RPS27,RPS28,ACOT4,RPL26,CDK5,RPS27A,TXN,UBA52,UBC,RPL23,DCTN1,ERP29,NEFL,LAMTOR1,STRADB,PRKAA1,RPS3,NDRG4,PINK1,YWHAB,PABPN1,CD81,RPL35,RPL13A,RPL36,RPL10A,RPL4,RPL7,RPL7A,RPL8,RPL9,RPL12,RPL13,RPL15,RPL17,RPL18,RPL18A,RPL19,RPL21,RPL22,RPL27,RPL30,RPL2…
3.AD/0.HA	GABA_neurons	Down	GO BP	GOBP_ORGANONITROGEN_COMPOUND_BIOSYNTHETIC_PROCESS	GOBP_ORGANONITROGEN_COMPOUND_BIOSYNTHETIC_PROCESS	1.44822	7.95717e-27	1.73307e-24	PARK7,DCN,DLD,IGFBP5,CCN1,DND1,MGST1,NPPC,RPL29,RPS6,RPL3,RPL5,RPL6,RPL10,RPL11,RPL23A,RPL24,RPL38,RPLP0,RPSA,RPS5,RPS10,RPS14,RPS15,RPS27,RPS28,TECR,MT3,ATP6V0C,RPL26,CDO1,ENO1,RPS27A,UBA52,RPL23,TRMT112,RPUSD4,GSTP1,PRKAA1,RPS3,PINK1,THBS1,RPL35,RPL13A,RPL36,RPL10A,RPL4,RPL7,RPL7A,RPL8,RPL9,RPL12,RPL13,RPL15,RPL17,RPL18,RPL18A,RPL19,RPL21,RPL22,RPL27,RPL30,RPL28,RPL31,RPL32,RPL34,RPL35A,RPL37,R…
3.AD/0.HA	GABA_neurons	Down	GO BP	GOBP_CELLULAR_AMIDE_METABOLIC_PROCESS	GOBP_CELLULAR_AMIDE_METABOLIC_PROCESS	1.66555	9.85651e-27	2.06418e-24	PARK7,DLD,HMGCS1,IGFBP5,CCN1,DND1,RPL29,RPS6,SOD1,RPL3,RPL5,RPL6,RPL10,RPL11,RPL23A,RPL24,RPL38,RPLP0,RPSA,RPS5,RPS10,RPS14,RPS15,RPS27,RPS28,ACOT4,TECR,RPL26,RPS27A,UBA52,RPL23,TRMT112,RPUSD4,ATP6AP2,ARL6IP5,GSTP1,PIN1,PRKAA1,RPS3,PINK1,THBS1,RPL35,RPL13A,RPL36,RPL10A,RPL4,RPL7,RPL7A,RPL8,RPL9,RPL12,RPL13,RPL15,RPL17,RPL18,RPL18A,RPL19,RPL21,RPL22,RPL27,RPL30,RPL28,RPL31,RPL32,RPL34,RPL35A,RPL37…
3.AD/0.HA	GABA_neurons	Down	GO BP	GOBP_ORGANIC_CYCLIC_COMPOUND_CATABOLIC_PROCESS	GOBP_ORGANIC_CYCLIC_COMPOUND_CATABOLIC_PROCESS	1.94663	1.61235e-25	3.25157e-23	MEIOC,DND1,RPL29,RPS6,UBB,RGN,RPL3,RPL5,RPL6,RPL10,RPL11,RPL23A,RPL24,RPL38,RPLP0,RPSA,RPS5,RPS10,RPS14,RPS15,RPS27,RPS28,MT3,RPL26,RPS27A,TDG,UBA52,UBC,RPL23,PSMA3,PSMA7,PSMB1,PSMB6,PSMB10,PSME1,RPS3,YWHAB,RPL35,RPL13A,RPL36,RPL10A,RPL4,RPL7,RPL7A,RPL8,RPL9,RPL12,RPL13,RPL15,RPL17,RPL18,RPL18A,RPL19,RPL21,RPL22,RPL27,RPL30,RPL28,RPL31,RPL32,RPL34,RPL35A,RPL37,RPL37A,RPL39,RPL41,RPL36A,RPLP1,RPLP…
3.AD/0.HA	GABA_neurons	Down	GO BP	GOBP_CELLULAR_RESPIRATION	GOBP_CELLULAR_RESPIRATION	2.9157	1.73397e-24	3.37195e-22	PARK7,DLD,ISCU,PINK1,NDUFC2,MDH1,MDH2,IDH3B,ETFDH,NDUFAB1,UQCR11,NDUFA11,COX4I1,COX5B,COX6A1,COX6B1,COX6C,COX7B,COX7C,COX8A,COX15,CYC1,BLOC1S1,UQCRQ,UQCR10,NDUFS7,NDUFA1,NDUFA4,NDUFA5,NDUFA6,NDUFA7,NDUFB3,NDUFB5,NDUFB8,NDUFB9,NDUFB10,NDUFS3,NDUFV1,NDUFS5,NDUFS6,NDUFS8,NDUFA13,CHCHD2,ATP5F1D,NDUFB11,NDUFA12,UQCRB,UQCRFS1,UQCC3,SLC25A14,COQ10A,COX5A
3.AD/0.HA	GABA_neurons	Down	GO BP	GOBP_ELECTRON_TRANSPORT_CHAIN	GOBP_ELECTRON_TRANSPORT_CHAIN	2.95911	4.38599e-24	8.23507e-22	PARK7,DLD,ISCU,PINK1,NDUFC2,DEGS1,COX7A1,COX7A2,ADH5,IDH3B,ETFDH,NDUFAB1,UQCR11,NDUFA11,COX4I1,COX5B,COX6A1,COX6B1,COX6C,COX7B,COX7C,COX8A,COX15,CYC1,UQCRQ,UQCR10,NDUFS7,NDUFA1,NDUFA4,NDUFA5,NDUFA6,NDUFA7,NDUFB3,NDUFB5,NDUFB8,NDUFB9,NDUFB10,NDUFS3,NDUFV1,NDUFS5,NDUFS6,NDUFS8,NDUFA13,CHCHD2,NDUFB11,NDUFA12,UQCRB,UQCRFS1,UQCC3,COX5A
3.AD/0.HA	GABA_neurons	Down	GO BP	GOBP_ESTABLISHMENT_OF_PROTEIN_LOCALIZATION	GOBP_ESTABLISHMENT_OF_PROTEIN_LOCALIZATION	1.29028	3.2131e-23	5.83178e-21	SLC25A4,BCAP31,CETN2,PARK7,DNAJC19,HSP90AB1,MAK,RAB3A,RBP4,RPL29,RPS6,SFRP1,UBB,AAAS,DYNLL1,NDFIP1,RPL3,RPL5,RPL6,RPL10,RPL11,RPL23A,RPL24,RPL38,RPLP0,RPSA,RPS5,RPS10,RPS14,RPS15,RPS27,RPS28,ACOT4,ATP6V1B2,ATP6V0C,ATP6V0B,ATP6AP1,ATP6V1F,ATP6V1G1,RPL26,CDK5,PPID,RPS27A,TXN,UBA52,UBC,RPL23,NR1D1,ERP29,EMC10,PPIA,STRADB,CAMK2N1,PRKAA1,RPS3,PINK1,YWHAB,CALM1,PABPN1,CD81,RPL35,RPL13A,RPL36,RPL10A,RPL…
3.AD/0.HA	GABA_neurons	Down	GO BP	GOBP_MITOCHONDRION_ORGANIZATION	GOBP_MITOCHONDRION_ORGANIZATION	1.93951	4.20385e-22	7.38386e-20	SLC25A4,SLC25A36,PIF1,BCAP31,PARK7,DNAJC19,DCN,RAB3A,VDAC2,CDK5,PRKAA1,PINK1,YWHAB,CALM1,GABARAP,VPS35,POLDIP2,CALM3,PPIF,MAP1LC3A,UBL5,CDC37,GABARAPL2,FUNDC1,GABARAPL1,CISD2,TOMM7,ATG9A,MAP1LC3B,ATP5IF1,CLU,YWHAH,CCK,CHCHD10,TOMM20,STOML2,NDUFC2,MLLT11,PDCD5,COX7A1,COX7A2,SLC25A5,SLC25A6,NDUFAB1,ATP5PD,NDUFA11,NDUFS7,NDUFA1,NDUFA5,NDUFA6,NDUFA7,NDUFB3,NDUFB5,NDUFB8,NDUFB9,NDUFB10,NDUFS3,NDUFV1,N…
3.AD/0.HA	GABA_neurons	Down	GO BP	GOBP_GENERATION_OF_PRECURSOR_METABOLITES_AND_ENERGY	GOBP_GENERATION_OF_PRECURSOR_METABOLITES_AND_ENERGY	1.9346	2.33073e-21	3.96588e-19	SLC25A4,PARK7,DLD,PCDH12,AAAS,ISCU,MT3,ENO1,NR1D1,PRKAA1,PINK1,CALM1,GAPDH,PGM2L1,PPP1CA,PPIF,ATP5IF1,CHCHD10,ALDOC,STOML2,NDUFC2,PGAM1,DEGS1,COX7A1,COX7A2,ADH5,ENO2,MDH1,MDH2,PFKM,TPI1,IDH3B,ETFDH,NDUFAB1,ATP5PD,UQCR11,NDUFA11,COX4I1,COX5B,COX6A1,COX6B1,COX6C,COX7B,COX7C,COX8A,COX15,CYC1,BLOC1S1,UQCRQ,UQCR10,NDUFS7,NDUFA1,NDUFA4,NDUFA5,NDUFA6,NDUFA7,NDUFB3,NDUFB5,NDUFB8,NDUFB9,NDUFB10,NDUFS3,NDU…
3.AD/0.HA	GABA_neurons	Down	GO BP	GOBP_CELLULAR_MACROMOLECULE_CATABOLIC_PROCESS	GOBP_CELLULAR_MACROMOLECULE_CATABOLIC_PROCESS	1.43808	1.09717e-20	1.81033e-18	BCAP31,PARK7,MEIOC,HSP90AB1,DND1,PITHD1,RPL29,RPS6,UBB,RGN,NDFIP1,RPL3,RPL5,RPL6,RPL10,RPL11,RPL23A,RPL24,RPL38,RPLP0,RPSA,RPS5,RPS10,RPS14,RPS15,RPS27,RPS28,ANAPC15,ANAPC11,RPL26,CDK5RAP3,KAT5,RPS27A,UBA52,UBC,RPL23,NR1D1,SH3RF2,ARAF,PSMA3,PSMA7,PSMB1,PSMB6,PSMB10,PSME1,RPS3,SKP1,PINK1,UCHL1,YWHAB,CD81,RPL35,RPL13A,RPL36,RPL10A,RPL4,RPL7,RPL7A,RPL8,RPL9,RPL12,RPL13,RPL15,RPL17,RPL18,RPL18A,RPL19…
3.AD/0.HA	GABA_neurons	Down	GO BP	GOBP_ENERGY_DERIVATION_BY_OXIDATION_OF_ORGANIC_COMPOUNDS	GOBP_ENERGY_DERIVATION_BY_OXIDATION_OF_ORGANIC_COMPOUNDS	2.36106	2.72124e-20	4.35798e-18	PARK7,DLD,PCDH12,ISCU,MT3,NR1D1,PINK1,CALM1,PGM2L1,PPP1CA,NDUFC2,MDH1,MDH2,IDH3B,ETFDH,NDUFAB1,UQCR11,NDUFA11,COX4I1,COX5B,COX6A1,COX6B1,COX6C,COX7B,COX7C,COX8A,COX15,CYC1,BLOC1S1,UQCRQ,UQCR10,NDUFS7,NDUFA1,NDUFA4,NDUFA5,NDUFA6,NDUFA7,NDUFB3,NDUFB5,NDUFB8,NDUFB9,NDUFB10,NDUFS3,NDUFV1,NDUFS5,NDUFS6,NDUFS8,NDUFA13,CHCHD2,ATP5F1D,NDUFB11,NDUFA12,UQCRB,UQCRFS1,UQCC3,SLC25A14,COQ10A,COX5A
3.AD/0.HA	GABA_neurons	Down	GO BP	GOBP_CELLULAR_MACROMOLECULE_LOCALIZATION	GOBP_CELLULAR_MACROMOLECULE_LOCALIZATION	1.21008	2.94955e-20	4.58865e-18	BCAP31,PARK7,DNAJC19,HSP90AB1,MAK,RAB3A,RPL29,RPS6,UBB,AAAS,DYNLL1,TERF2IP,RPL3,RPL5,RPL6,RPL10,RPL11,RPL23A,RPL24,RPL38,RPLP0,RPSA,RPS5,RPS10,RPS14,RPS15,RPS27,RPS28,ACOT4,ZWILCH,RPL26,CDK5RAP3,CDK5,RPS27A,TXN,UBA52,UBC,RPL23,ARL6IP5,ERP29,DVL2,EMC10,LAMTOR2,PIN1,LAMTOR1,STRADB,PRKAA1,RPS3,SKP1,PINK1,YWHAB,CALM1,PABPN1,CD81,RPL35,RPL13A,RPL36,RPL10A,RPL4,RPL7,RPL7A,RPL8,RPL9,RPL12,RPL13,RPL15,RP…
3.AD/0.HA	GABA_neurons	Down	GO BP	GOBP_MACROMOLECULE_CATABOLIC_PROCESS	GOBP_MACROMOLECULE_CATABOLIC_PROCESS	1.33774	4.09086e-20	6.18743e-18	BCAP31,PARK7,DCN,MEIOC,HSP90AB1,DND1,PITHD1,RPL29,RPS6,UBB,RGN,NDFIP1,RPL3,RPL5,RPL6,RPL10,RPL11,RPL23A,RPL24,RPL38,RPLP0,RPSA,RPS5,RPS10,RPS14,RPS15,RPS27,RPS28,ANAPC15,ANAPC11,RPL26,CDK5RAP3,CDK5,KAT5,RPS27A,UBA52,UBC,RPL23,NR1D1,CHI3L1,SH3RF2,ARAF,PIN1,PSMA3,PSMA7,PSMB1,PSMB6,PSMB10,PSME1,RPS3,CEACAM1,SKP1,PINK1,UCHL1,YWHAB,CALM1,CD81,RPL35,RPL13A,RPL36,RPL10A,RPL4,RPL7,RPL7A,RPL8,RPL9,RPL12,R…
3.AD/0.HA	GABA_neurons	Down	GO BP	GOBP_MITOCHONDRIAL_ELECTRON_TRANSPORT_NADH_TO_UBIQUINONE	GOBP_MITOCHONDRIAL_ELECTRON_TRANSPORT_NADH_TO_UBIQUINONE	4.15759	9.54861e-20	1.40519e-17	PARK7,DLD,ISCU,PINK1,NDUFC2,NDUFAB1,NDUFA11,NDUFS7,NDUFA1,NDUFA4,NDUFA5,NDUFA6,NDUFA7,NDUFB3,NDUFB5,NDUFB8,NDUFB9,NDUFB10,NDUFS3,NDUFV1,NDUFS5,NDUFS6,NDUFS8,NDUFA13,NDUFB11,NDUFA12
3.AD/0.HA	GABA_neurons	Down	GO BP	GOBP_CYTOPLASMIC_TRANSLATION	GOBP_CYTOPLASMIC_TRANSLATION	3.26599	3.57096e-19	5.1168e-17	RPL29,RPL6,RPL11,RPL24,RPL38,RPLP0,RPSA,RPS28,RPL26,RPL13A,RPL36,RPL10A,RPL8,RPL9,RPL15,RPL17,RPL18,RPL18A,RPL19,RPL22,RPL30,RPL31,RPL32,RPL35A,RPL39,RPL41,RPL36A,RPLP1,RPLP2,RPS21,RPS23,RPS29,EIF4A2,TMA7
3.AD/0.HA	GABA_neurons	Down	GO BP	GOBP_MRNA_METABOLIC_PROCESS	GOBP_MRNA_METABOLIC_PROCESS	1.55556	5.96442e-19	8.32725e-17	MEIOC,DND1,RPL29,RPS6,UBB,RPL3,RPL5,RPL6,RPL10,RPL11,RPL23A,RPL24,RPL38,RPLP0,RPSA,RPS5,RPS10,RPS14,RPS15,RPS27,RPS28,RPL26,RPS27A,UBA52,UBC,RPL23,PSMA3,PSMA7,PSMB1,PSMB6,PSMB10,PSME1,RPS3,YWHAB,PABPN1,RPL35,RPL13A,RPL36,RPL10A,RPL4,RPL7,RPL7A,RPL8,RPL9,RPL12,RPL13,RPL15,RPL17,RPL18,RPL18A,RPL19,RPL21,RPL22,RPL27,RPL30,RPL28,RPL31,RPL32,RPL34,RPL35A,RPL37,RPL37A,RPL39,RPL41,RPL36A,RPLP1,RPLP2,RPS…
3.AD/0.HA	GABA_neurons	Down	GO BP	GOBP_NEGATIVE_REGULATION_OF_GENE_EXPRESSION	GOBP_NEGATIVE_REGULATION_OF_GENE_EXPRESSION	1.3619	1.79188e-17	2.43919e-15	PARK7,MEIOC,HSP90AB1,IGFBP5,DND1,SERPINF1,RPL29,RPS6,SFRP1,UBB,AAAS,NDFIP1,RPL3,RPL5,RPL6,RPL10,RPL11,RPL23A,RPL24,RPL38,RPLP0,RPSA,RPS5,RPS10,RPS14,RPS15,RPS27,RPS28,RPL26,ID2,KAT5,RPS27A,UBA52,UBC,RPL23,ERP29,FN1,GSTP1,PIN1,PRKAA1,PSMA3,PSMA7,PSMB1,PSMB6,PSMB10,PSME1,RPS3,CEACAM1,CX3CL1,PINK1,THBS1,YWHAB,RPL35,RPL13A,RPL36,RPL10A,RPL4,RPL7,RPL7A,RPL8,RPL9,RPL12,RPL13,RPL15,RPL17,RPL18,RPL18A,RP…
3.AD/0.HA	GABA_neurons	Down	GO BP	GOBP_NADH_DEHYDROGENASE_COMPLEX_ASSEMBLY	GOBP_NADH_DEHYDROGENASE_COMPLEX_ASSEMBLY	3.33742	7.82923e-14	1.03976e-11	NDUFC2,NDUFAB1,NDUFA11,NDUFS7,NDUFA1,NDUFA5,NDUFA6,NDUFA7,NDUFB3,NDUFB5,NDUFB8,NDUFB9,NDUFB10,NDUFS3,NDUFV1,NDUFS5,NDUFS6,NDUFS8,NDUFA13,NDUFB11,NDUFA12,NDUFAF8,DMAC1
3.AD/0.HA	GABA_neurons	Down	GO BP	GOBP_MITOCHONDRIAL_RESPIRATORY_CHAIN_COMPLEX_ASSEMBLY	GOBP_MITOCHONDRIAL_RESPIRATORY_CHAIN_COMPLEX_ASSEMBLY	2.82978	1.73627e-13	2.25095e-11	NDUFC2,NDUFAB1,NDUFA11,NDUFS7,NDUFA1,NDUFA5,NDUFA6,NDUFA7,NDUFB3,NDUFB5,NDUFB8,NDUFB9,NDUFB10,NDUFS3,NDUFV1,NDUFS5,NDUFS6,NDUFS8,NDUFA13,NDUFB11,NDUFA12,UQCRFS1,UQCC3,COA3,PET100,NDUFAF8,COX14,DMAC1
3.AD/0.HA	GABA_neurons	Down	GO BP	GOBP_PROTON_TRANSMEMBRANE_TRANSPORT	GOBP_PROTON_TRANSMEMBRANE_TRANSPORT	2.41096	5.16799e-13	6.54412e-11	PARK7,ATP6V1B2,ATP6V0C,ATP6V0B,ATP6AP1,ATP6V1F,ATP6V1G1,PPIF,STOML2,COX7A1,COX7A2,PM20D1,ATP5PD,COX4I1,COX6A1,COX6B1,COX6C,COX7B,COX7C,COX8A,COX15,NDUFS7,NDUFA4,ATP5F1D,ATP5F1E,ATP5MC1,ATP5MC2,ATP5MC3,ATP5ME,ATP5PF,ATP5PO,SLC25A14,COX5A,ATP5MF
3.AD/0.HA	GABA_neurons	Down	GO BP	GOBP_PROTEIN_CONTAINING_COMPLEX_SUBUNIT_ORGANIZATION	GOBP_PROTEIN_CONTAINING_COMPLEX_SUBUNIT_ORGANIZATION	0.96503	3.49822e-12	4.26581e-10	CETN2,PARK7,TUBGCP5,GPX4,HES1,HSP90AB1,RAB3A,UBB,VDAC2,POLQ,RPL3,RPL5,RPL6,RPL10,RPL11,RPL23A,RPL24,RPL38,RPLP0,TRAF7,RPSA,RPS5,RPS10,RPS14,RPS15,RPS27,RPS28,B2M,KAT5,EID2,PPID,RPS27A,UBA52,UBC,RPL23,DCTN1,TRMT112,DVL2,FN1,NEFL,RPS3,CX3CL1,SKP1,PINK1,RPL13A,STUB1,UBE2S,MAGEL2,CFL1,STMN2,GABARAP,DNAAF1,SPEF1,RSPH4A,STMN1,STMN3,CDK5R1,SNRPD2,SNRPE,SRSF9,PPP1CA,ARF1,AURKAIP1,RPA3,TAF10,RACK1,MAP1LC3…
3.AD/0.HA	GABA_neurons	Down	GO BP	GOBP_CELLULAR_PROTEIN_CONTAINING_COMPLEX_ASSEMBLY	GOBP_CELLULAR_PROTEIN_CONTAINING_COMPLEX_ASSEMBLY	1.19678	3.52546e-12	4.26581e-10	CETN2,TUBGCP5,GPX4,HSP90AB1,RAB3A,UBB,VDAC2,RPL3,RPL5,RPL6,RPL10,RPL11,RPL23A,RPL24,RPL38,RPLP0,TRAF7,RPSA,RPS5,RPS10,RPS14,RPS15,RPS27,RPS28,EID2,RPS27A,UBA52,UBC,DCTN1,NEFL,RPS3,PINK1,RPL13A,STUB1,UBE2S,MAGEL2,STMN2,DNAAF1,STMN1,CDK5R1,SNRPD2,SNRPE,SRSF9,ARF1,RPA3,TAF10,NUDT21,PIH1D1,TAF9,CLU,MYADM,VAMP2,SV2A,PFN1,PFN2,HOPX,AP2M1,AP2S1,NDUFC2,NSG1,COX7A1,COX7A2,PIP4P1,NDUFAB1,NDUFA11,COX15,NDUF…
3.AD/0.HA	GABA_neurons	Down	GO BP	GOBP_RIBOSOME_BIOGENESIS	GOBP_RIBOSOME_BIOGENESIS	1.79425	1.7353e-11	1.96849e-09	RPS6,RPL3,RPL5,RPL6,RPL10,RPL11,RPL23A,RPL24,RPL38,RPLP0,TRAF7,RPSA,RPS5,RPS10,RPS14,RPS15,RPS27,RPS28,RPL26,TRMT112,NOP10,RPUSD4,RPL35,RPL10A,RPL7,RPL7A,RPL27,RPL35A,RPS2,RPS7,RPS8,RPS9,RPS16,RPS17,RPS21,RPS24,RPS25,RPL14,SNU13,LAS1L,TSR2,PIH1D1,POP7,GTF3A,IMP3,IMP4,RBIS
3.AD/0.HA	GABA_neurons	Down	GO BP	GOBP_AEROBIC_RESPIRATION	GOBP_AEROBIC_RESPIRATION	2.68476	2.96809e-10	3.29821e-08	DLD,MDH1,MDH2,IDH3B,COX4I1,COX5B,COX6A1,COX6B1,COX6C,COX7B,COX7C,COX8A,COX15,BLOC1S1,UQCR10,NDUFS7,NDUFA4,NDUFS8,ATP5F1D,UQCRB,SLC25A14,COX5A
3.AD/0.HA	GABA_neurons	Down	GO BP	GOBP_RIBOSOMAL_LARGE_SUBUNIT_BIOGENESIS	GOBP_RIBOSOMAL_LARGE_SUBUNIT_BIOGENESIS	2.85005	3.68361e-10	4.01145e-08	RPL3,RPL5,RPL6,RPL10,RPL11,RPL23A,RPL24,RPL38,RPLP0,TRAF7,RPL26,RPL35,RPL10A,RPL7,RPL7A,RPL35A,RPL14,SNU13,LAS1L,GTF3A
3.AD/0.HA	GABA_neurons	Down	GO BP	GOBP_MITOCHONDRIAL_ELECTRON_TRANSPORT_CYTOCHROME_C_TO_OXYGEN	GOBP_MITOCHONDRIAL_ELECTRON_TRANSPORT_CYTOCHROME_C_TO_OXYGEN	4.47877	8.6394e-10	9.04645e-08	COX4I1,COX5B,COX6A1,COX6B1,COX6C,COX7B,COX7C,COX8A,COX15,NDUFA4,COX5A
3.AD/0.HA	GABA_neurons	Down	GO BP	GOBP_CRISTAE_FORMATION	GOBP_CRISTAE_FORMATION	3.60823	9.14831e-10	9.39859e-08	PINK1,CHCHD10,ATP5PD,ATP5F1D,ATP5F1E,ATP5MC1,ATP5MC2,ATP5MC3,ATP5ME,ATP5PF,ATP5PO,UQCC3,ATP5MF,MICOS13
3.AD/0.HA	GABA_neurons	Down	GO BP	GOBP_ATP_SYNTHESIS_COUPLED_PROTON_TRANSPORT	GOBP_ATP_SYNTHESIS_COUPLED_PROTON_TRANSPORT	3.9674	2.01453e-09	2.03132e-07	ATP6V0C,STOML2,ATP5PD,ATP5F1D,ATP5F1E,ATP5MC1,ATP5MC2,ATP5MC3,ATP5ME,ATP5PF,ATP5PO,ATP5MF
3.AD/0.HA	GABA_neurons	Down	GO BP	GOBP_MITOCHONDRIAL_MEMBRANE_ORGANIZATION	GOBP_MITOCHONDRIAL_MEMBRANE_ORGANIZATION	2.15432	3.09314e-09	3.06221e-07	VDAC2,PINK1,YWHAB,CALM1,CALM3,PPIF,ATP5IF1,YWHAH,CHCHD10,PDCD5,SLC25A5,ATP5PD,NDUFA13,ATP5F1D,ATP5F1E,ATP5MC1,ATP5MC2,ATP5MC3,ATP5ME,ATP5PF,ATP5PO,UQCC3,ATP5MF,TMEM14A,RHOT2,MICOS13,MICOS10
3.AD/0.HA	GABA_neurons	Down	GO BP	GOBP_MITOCHONDRIAL_ATP_SYNTHESIS_COUPLED_PROTON_TRANSPORT	GOBP_MITOCHONDRIAL_ATP_SYNTHESIS_COUPLED_PROTON_TRANSPORT	4.18802	3.29223e-09	3.20111e-07	STOML2,ATP5PD,ATP5F1D,ATP5F1E,ATP5MC1,ATP5MC2,ATP5MC3,ATP5ME,ATP5PF,ATP5PO,ATP5MF
3.AD/0.HA	GABA_neurons	Down	GO BP	GOBP_RIBONUCLEOPROTEIN_COMPLEX_BIOGENESIS	GOBP_RIBONUCLEOPROTEIN_COMPLEX_BIOGENESIS	1.39838	5.55383e-09	5.30537e-07	HSP90AB1,RPS6,RPL3,RPL5,RPL6,RPL10,RPL11,RPL23A,RPL24,RPL38,RPLP0,TRAF7,RPSA,RPS5,RPS10,RPS14,RPS15,RPS27,RPS28,RPL26,TRMT112,NOP10,RPUSD4,RPL35,RPL13A,RPL10A,RPL7,RPL7A,RPL27,RPL35A,RPS2,RPS7,RPS8,RPS9,RPS16,RPS17,RPS21,RPS24,RPS25,RPL14,SNRPD2,SNRPE,SRSF9,NUDT21,SNU13,LAS1L,TSR2,PIH1D1,TAF9,POP7,GTF3A,IMP3,IMP4,RBIS
3.AD/0.HA	GABA_neurons	Down	GO BP	GOBP_RIBOSOME_ASSEMBLY	GOBP_RIBOSOME_ASSEMBLY	2.82422	9.22488e-09	8.66026e-07	RPL3,RPL5,RPL6,RPL10,RPL11,RPL23A,RPL24,RPL38,RPLP0,TRAF7,RPSA,RPS5,RPS10,RPS14,RPS15,RPS27,RPS28
3.AD/0.HA	GABA_neurons	Down	GO BP	GOBP_RIBONUCLEOSIDE_TRIPHOSPHATE_BIOSYNTHETIC_PROCESS	GOBP_RIBONUCLEOSIDE_TRIPHOSPHATE_BIOSYNTHETIC_PROCESS	2.6944	1.07225e-08	9.89563e-07	ATP6V0C,ENO1,PINK1,NME1,NME2,STOML2,ATP5PD,ATP5F1D,ATP5F1E,ATP5MC1,ATP5MC2,ATP5MC3,ATP5ME,ATP5PF,ATP5PO,UQCC3,ATP5MF,NME3
3.AD/0.HA	GABA_neurons	Down	GO BP	GOBP_INNER_MITOCHONDRIAL_MEMBRANE_ORGANIZATION	GOBP_INNER_MITOCHONDRIAL_MEMBRANE_ORGANIZATION	2.90945	1.27599e-08	1.15796e-06	PINK1,CHCHD10,ATP5PD,NDUFA13,ATP5F1D,ATP5F1E,ATP5MC1,ATP5MC2,ATP5MC3,ATP5ME,ATP5PF,ATP5PO,UQCC3,ATP5MF,MICOS13,MICOS10
3.AD/0.HA	GABA_neurons	Down	GO BP	GOBP_RRNA_METABOLIC_PROCESS	GOBP_RRNA_METABOLIC_PROCESS	1.70521	2.10957e-08	1.88305e-06	RPS6,RPL5,RPL11,RPS14,RPS15,RPS27,RPS28,RPL26,TRMT112,NOP10,RPUSD4,RPL35,RPL10A,RPL7,RPL7A,RPL27,RPL35A,RPS2,RPS7,RPS8,RPS9,RPS16,RPS17,RPS21,RPS24,RPS25,RPL14,SNU13,LAS1L,TSR2,PIH1D1,POP7,IMP3,IMP4,TRIR
3.AD/0.HA	GABA_neurons	Down	GO BP	GOBP_NUCLEOSIDE_TRIPHOSPHATE_BIOSYNTHETIC_PROCESS	GOBP_NUCLEOSIDE_TRIPHOSPHATE_BIOSYNTHETIC_PROCESS	2.51496	2.24509e-08	1.9717e-06	ATP6V0C,ENO1,PINK1,NME1,NME2,STOML2,ATP5PD,ATP5F1D,ATP5F1E,ATP5MC1,ATP5MC2,ATP5MC3,ATP5ME,ATP5PF,ATP5PO,UQCC3,ATP5MF,AK1,NME3
3.AD/0.HA	GABA_neurons	Down	GO BP	GOBP_RIBOSOMAL_SMALL_SUBUNIT_BIOGENESIS	GOBP_RIBOSOMAL_SMALL_SUBUNIT_BIOGENESIS	2.58518	2.80425e-08	2.42367e-06	RPS6,RPL38,RPSA,RPS5,RPS10,RPS14,RPS15,RPS27,RPS28,RPS7,RPS8,RPS16,RPS17,RPS21,RPS24,RPS25,SNU13,TSR2
3.AD/0.HA	GABA_neurons	Down	GO BP	GOBP_ATP_BIOSYNTHETIC_PROCESS	GOBP_ATP_BIOSYNTHETIC_PROCESS	2.85222	5.4828e-08	4.66466e-06	ATP6V0C,ENO1,PINK1,STOML2,ATP5PD,ATP5F1D,ATP5F1E,ATP5MC1,ATP5MC2,ATP5MC3,ATP5ME,ATP5PF,ATP5PO,UQCC3,ATP5MF
3.AD/0.HA	GABA_neurons	Down	GO BP	GOBP_MITOCHONDRIAL_TRANSPORT	GOBP_MITOCHONDRIAL_TRANSPORT	1.5771	6.50597e-08	5.36743e-06	SLC25A4,SLC25A36,BCAP31,DNAJC19,VDAC2,PRKAA1,PINK1,YWHAB,VPS35,PPIF,UBL5,TOMM7,ATP5IF1,YWHAH,CHCHD10,TOMM20,MPC2,STOML2,PDCD5,SLC25A5,SLC25A6,ATP5PD,NDUFA13,ATP5F1D,ATP5F1E,ATP5MC1,ATP5MC2,ATP5MC3,ATP5ME,ATP5PF,ATP5PO,SLC25A14,ATP5MF,TOMM5,SMDT1,TMEM14A,RHOT2
3.AD/0.HA	GABA_neurons	Down	GO BP	GOBP_TRANSLATIONAL_ELONGATION	GOBP_TRANSLATIONAL_ELONGATION	2.03216	8.7152e-08	7.08273e-06	RPL30,RPLP1,RPLP2,AURKAIP1,RACK1,EEF1A1,MRPS36,CHCHD1,EEF1B2,EEF1G,MRPL21,MRPL46,MRPL51,MRPL27,MRPS21,MRPL16,MRPS12,MRPL34,MRPS34,SRP9,TUFM,MRPL57,ABTB1,MRPL43
3.AD/0.HA	GABA_neurons	Down	GO BP	GOBP_RIBONUCLEOSIDE_TRIPHOSPHATE_METABOLIC_PROCESS	GOBP_RIBONUCLEOSIDE_TRIPHOSPHATE_METABOLIC_PROCESS	2.34325	2.31747e-07	1.85568e-05	ATP6V0C,ENO1,PINK1,NME1,NME2,STOML2,ATP5PD,ATP5F1D,ATP5F1E,ATP5MC1,ATP5MC2,ATP5MC3,ATP5ME,ATP5PF,ATP5PO,UQCC3,ATP5MF,NME3
3.AD/0.HA	GABA_neurons	Down	GO BP	GOBP_RIBOSOMAL_LARGE_SUBUNIT_ASSEMBLY	GOBP_RIBOSOMAL_LARGE_SUBUNIT_ASSEMBLY	3.42086	5.69529e-07	4.49433e-05	RPL3,RPL5,RPL6,RPL10,RPL11,RPL23A,RPL24,RPL38,RPLP0,TRAF7
3.AD/0.HA	GABA_neurons	Down	GO BP	GOBP_MITOCHONDRIAL_TRANSMEMBRANE_TRANSPORT	GOBP_MITOCHONDRIAL_TRANSMEMBRANE_TRANSPORT	2.04321	8.81572e-07	6.85737e-05	SLC25A4,SLC25A36,DNAJC19,TOMM7,TOMM20,MPC2,STOML2,SLC25A5,SLC25A6,ATP5PD,ATP5F1D,ATP5F1E,ATP5MC1,ATP5MC2,ATP5MC3,ATP5ME,ATP5PF,ATP5PO,ATP5MF,SMDT1
3.AD/0.HA	GABA_neurons	Down	GO BP	GOBP_MITOCHONDRIAL_ELECTRON_TRANSPORT_UBIQUINOL_TO_CYTOCHROME_C	GOBP_MITOCHONDRIAL_ELECTRON_TRANSPORT_UBIQUINOL_TO_CYTOCHROME_C	4.405	1.40619e-06	0.000107841	UQCR11,CYC1,UQCRQ,UQCR10,UQCRB,UQCRFS1,UQCC3
3.AD/0.HA	GABA_neurons	Down	GO BP	GOBP_NUCLEOSIDE_TRIPHOSPHATE_METABOLIC_PROCESS	GOBP_NUCLEOSIDE_TRIPHOSPHATE_METABOLIC_PROCESS	2.01728	2.0478e-06	0.000154865	ATP6V0C,ENO1,PINK1,NME1,NME2,STOML2,ATP5PD,ATP5F1D,ATP5F1E,ATP5MC1,ATP5MC2,ATP5MC3,ATP5ME,ATP5PF,ATP5PO,UQCC3,ATP5MF,AK1,NME3
3.AD/0.HA	GABA_neurons	Down	GO BP	GOBP_RIBOSOMAL_SMALL_SUBUNIT_ASSEMBLY	GOBP_RIBOSOMAL_SMALL_SUBUNIT_ASSEMBLY	3.72402	2.54063e-06	0.000189503	RPL38,RPSA,RPS5,RPS10,RPS14,RPS15,RPS27,RPS28
3.AD/0.HA	GABA_neurons	Down	GO BP	GOBP_MACROAUTOPHAGY	GOBP_MACROAUTOPHAGY	1.34204	3.15057e-06	0.000225722	DCN,DYNLL1,ATP6V1B2,ATP6V0C,ATP6V0B,ATP6V1G1,CDK5,LAMTOR2,LAMTOR1,PRKAA1,PINK1,UCHL1,GABARAP,GAPDH,CDK5R1,VPS35,POLDIP2,MAP1LC3A,CDC37,GABARAPL2,FUNDC1,GABARAPL1,TOMM7,ATG9A,MAP1LC3B,LAMTOR5,RRAGA,TOMM20,DDRGK1,CAPN1,DYNLL2,VPS28,TOMM5,EMC6,UFC1,SCOC,TOMM6
3.AD/0.HA	GABA_neurons	Down	GO BP	GOBP_REGULATION_OF_INTRINSIC_APOPTOTIC_SIGNALING_PATHWAY	GOBP_REGULATION_OF_INTRINSIC_APOPTOTIC_SIGNALING_PATHWAY	1.71075	4.48731e-06	0.000317317	BCAP31,PARK7,SOD1,UBB,VDAC2,RPL11,RPL26,ENO1,ERP29,PPIA,RPS3,PINK1,RPS7,CDKN2D,PPIF,RACK1,TAF9,CLU,HYOU1,NDUFS3,NDUFA13,TPT1,GRINA
3.AD/0.HA	GABA_neurons	Down	GO BP	GOBP_SUBSTANTIA_NIGRA_DEVELOPMENT	GOBP_SUBSTANTIA_NIGRA_DEVELOPMENT	2.69214	7.58064e-06	0.000529187	RAD1,DYNLL1,CALM1,CALM3,YWHAH,CALM2,CKB,COX6B1,NDUFS3,ATP5PF,SYNGR3
3.AD/0.HA	GABA_neurons	Down	GO BP	GOBP_CELLULAR_TRANSITION_METAL_ION_HOMEOSTASIS	GOBP_CELLULAR_TRANSITION_METAL_ION_HOMEOSTASIS	1.85761	8.23636e-06	0.000567683	SOD1,NDFIP1,ISCU,FTH1,FTL,MT3,ATOX1,SLC22A17,ATP6AP1,SLC39A10,SLC30A3,SLC39A7,ATP6V1G1,SKP1,ARF1,SRI,PRNP,NEDD8,MT1X
3.AD/0.HA	GABA_neurons	Down	GO BP	GOBP_REGULATION_OF_APOPTOTIC_SIGNALING_PATHWAY	GOBP_REGULATION_OF_APOPTOTIC_SIGNALING_PATHWAY	1.2521	8.39703e-06	0.000571523	BCAP31,PARK7,SFRP1,SOD1,UBB,VDAC2,RPL11,TRAF7,RPL26,ENO1,ERP29,GSTP1,PPIA,STRADB,RPS3,CX3CL1,PINK1,PRDX2,THBS1,PEA15,RPS7,PPP1CA,CDKN2D,PPIF,RACK1,PIH1D1,TAF9,CLU,IL7,SLC25A5,HYOU1,NDUFS3,NDUFA13,TPT1,TMEM14A,GRINA,BCL2L14,ITM2C
3.AD/0.HA	GABA_neurons	Down	GO BP	GOBP_REGULATION_OF_MITOCHONDRIAL_MEMBRANE_POTENTIAL	GOBP_REGULATION_OF_MITOCHONDRIAL_MEMBRANE_POTENTIAL	2.18982	1.365e-05	0.000917585	SLC25A36,PARK7,DCN,SOD1,UBB,ARL6IP5,PINK1,RACK1,ATP5IF1,CCK,STOML2,MLLT11,GOT1,MTLN
3.AD/0.HA	GABA_neurons	Down	GO BP	GOBP_NUCLEOSIDE_PHOSPHATE_BIOSYNTHETIC_PROCESS	GOBP_NUCLEOSIDE_PHOSPHATE_BIOSYNTHETIC_PROCESS	1.3307	1.59143e-05	0.00105675	DLD,NPPC,TECR,ATP6V0C,ENO1,PINK1,HPCA,MPC2,NME1,NME2,STOML2,NAPRT,NAXE,ATP5PD,ATP5F1D,ATP5F1E,ATP5MC1,ATP5MC2,ATP5MC3,ATP5ME,ATP5PF,ATP5PO,UQCC3,ATP5MF,AK1,NME3,TK2,UPP1,RFK,GUK1,AK6
3.AD/0.HA	GABA_neurons	Down	GO BP	GOBP_CELLULAR_HOMEOSTASIS	GOBP_CELLULAR_HOMEOSTASIS	0.813928	1.81151e-05	0.00118839	BCAP31,DLD,SERPINF1,SOD1,TAC1,DYNLL1,RGN,TMEM203,NDFIP1,ISCU,FTH1,FTL,MT3,ATOX1,SLC22A17,ATP6V1B2,ATP6V0C,ATP6V0B,ATP6AP1,SLC39A10,SLC30A3,SLC39A7,ATP6V1F,ATP6V1G1,CDK5,TXN,NR1D1,DCTN1,ATP6AP2,GNG3,CAMK2N1,PRKAA1,CX3CL1,SKP1,PINK1,PRDX2,CALM1,UBE2S,APEX1,ARF1,RPA3,CALM3,RACK1,PRDX5,PRDX1,PIH1D1,THY1,CALM2,SV2A,ATP1B1,SLC4A3,SRI,CALB1,PTGER3,MPC2,PHPT1,LGALS1,NME1,NME2,VSNL1,LPAR6,STOML2,PRNP,SELE…
3.AD/0.HA	GABA_neurons	Down	GO BP	GOBP_APOPTOTIC_SIGNALING_PATHWAY	GOBP_APOPTOTIC_SIGNALING_PATHWAY	0.980066	1.88419e-05	0.00122136	BCAP31,PARK7,NBN,SFRP1,SOD1,UBB,VDAC2,RPL11,TRAF7,RPL26,ENO1,ARL6IP5,ERP29,GSTP1,PPIA,STRADB,RPS3,CX3CL1,PINK1,PRDX2,THBS1,YWHAB,PEA15,RPS7,GABARAP,PPP1CA,CDKN2D,PPIF,RACK1,ATP5IF1,PIH1D1,TAF9,CLU,YWHAH,CCK,CHCHD10,SST,IL7,SELENOK,MLLT11,PDCD5,SLC25A5,HYOU1,NDUFS3,NDUFA13,TFPT,TPT1,TMEM14A,RHOT2,GRINA,HINT1,BCL2L14,ITM2C,TNFRSF25
3.AD/0.HA	GABA_neurons	Down	GO BP	GOBP_RIBOSE_PHOSPHATE_BIOSYNTHETIC_PROCESS	GOBP_RIBOSE_PHOSPHATE_BIOSYNTHETIC_PROCESS	1.48492	1.97086e-05	0.00126251	DLD,NPPC,TECR,ATP6V0C,ENO1,PINK1,MPC2,NME1,NME2,STOML2,ATP5PD,ATP5F1D,ATP5F1E,ATP5MC1,ATP5MC2,ATP5MC3,ATP5ME,ATP5PF,ATP5PO,UQCC3,ATP5MF,AK1,NME3,UPP1,RFK
3.AD/0.HA	GABA_neurons	Down	GO BP	GOBP_TRANSITION_METAL_ION_HOMEOSTASIS	GOBP_TRANSITION_METAL_ION_HOMEOSTASIS	1.65846	2.83897e-05	0.00179746	SOD1,NDFIP1,ISCU,FTH1,FTL,MT3,ATOX1,SLC22A17,ATP6AP1,B2M,SLC39A10,SLC30A3,SLC39A7,ATP6V1G1,SKP1,ARF1,SRI,PRNP,NEDD8,MT1X
3.AD/0.HA	GABA_neurons	Down	GO BP	GOBP_MIDBRAIN_DEVELOPMENT	GOBP_MIDBRAIN_DEVELOPMENT	1.96799	3.26718e-05	0.0020448	HES1,RAD1,SFRP1,DYNLL1,CALM1,CALM3,YWHAH,CALM2,FZD6,CKB,COX6B1,UQCRQ,NDUFS3,ATP5PF,SYNGR3
3.AD/0.HA	GABA_neurons	Down	GO BP	GOBP_REGULATION_OF_TRANSCRIPTION_FROM_RNA_POLYMERASE_II_PROMOTER_IN_RESPONSE_TO_HYPOXIA	GOBP_REGULATION_OF_TRANSCRIPTION_FROM_RNA_POLYMERASE_II_PROMOTER_IN_RESPONSE_TO_HYPOXIA	2.01935	4.21394e-05	0.00257808	UBB,BACH1,RPS27A,UBA52,UBC,PSMA3,PSMA7,PSMB1,PSMB6,PSMB10,PSME1,ELOC,ELOB,HIGD1A
3.AD/0.HA	GABA_neurons	Down	GO BP	GOBP_NEURAL_NUCLEUS_DEVELOPMENT	GOBP_NEURAL_NUCLEUS_DEVELOPMENT	2.21764	4.68838e-05	0.00283647	RAD1,DYNLL1,CALM1,CDK5R1,CALM3,YWHAH,CALM2,CKB,COX6B1,NDUFS3,ATP5PF,SYNGR3
3.AD/0.HA	GABA_neurons	Down	GO BP	GOBP_NADH_METABOLIC_PROCESS	GOBP_NADH_METABOLIC_PROCESS	2.50715	4.83892e-05	0.00289538	ENO1,GAPDH,PGM2L1,ALDOC,PGAM1,ENO2,MDH1,MDH2,PFKM,TPI1
3.AD/0.HA	GABA_neurons	Down	GO BP	GOBP_RIBONUCLEOPROTEIN_COMPLEX_SUBUNIT_ORGANIZATION	GOBP_RIBONUCLEOPROTEIN_COMPLEX_SUBUNIT_ORGANIZATION	1.39853	6.74913e-05	0.00395151	HSP90AB1,RPL3,RPL5,RPL6,RPL10,RPL11,RPL23A,RPL24,RPL38,RPLP0,TRAF7,RPSA,RPS5,RPS10,RPS14,RPS15,RPS27,RPS28,RPL13A,SNRPD2,SNRPE,SRSF9,NUDT21,PIH1D1,TAF9
3.AD/0.HA	GABA_neurons	Down	GO BP	GOBP_REGULATION_OF_PROTEIN_STABILITY	GOBP_REGULATION_OF_PROTEIN_STABILITY	1.21364	7.14391e-05	0.00413454	PARK7,HSP90AB1,RPL5,RPL11,MT3,RPL23,NR1D1,PIN1,PINK1,CD81,RPS7,STUB1,GAPDH,VPS35,HSPA8,PPIB,CDC37,TOMM7,TAF9,CLU,DDRGK1,ATP1B1,PFN1,PFN2,RABL3,PRNP,PDCL3,DPM2,RAD23A,CAMLG,IFT46,ISOC2
3.AD/0.HA	GABA_neurons	Down	GO BP	GOBP_PURINE_CONTAINING_COMPOUND_BIOSYNTHETIC_PROCESS	GOBP_PURINE_CONTAINING_COMPOUND_BIOSYNTHETIC_PROCESS	1.38188	7.3983e-05	0.00419622	DLD,NPPC,TECR,ATP6V0C,ENO1,PINK1,HPCA,MPC2,NME1,NME2,STOML2,ATP5PD,ATP5F1D,ATP5F1E,ATP5MC1,ATP5MC2,ATP5MC3,ATP5ME,ATP5PF,ATP5PO,UQCC3,ATP5MF,AK1,NME3,GUK1
3.AD/0.HA	GABA_neurons	Down	GO BP	GOBP_REGULATION_OF_UBIQUITIN_PROTEIN_TRANSFERASE_ACTIVITY	GOBP_REGULATION_OF_UBIQUITIN_PROTEIN_TRANSFERASE_ACTIVITY	2.25314	7.94676e-05	0.00445182	PARK7,RPL5,RPL11,RPL23,PIN1,SKP1,PINK1,RPS2,RPS7,STUB1,UBE2S
3.AD/0.HA	GABA_neurons	Down	GO BP	GOBP_REGULATION_OF_CYCLIC_NUCLEOTIDE_PHOSPHODIESTERASE_ACTIVITY	GOBP_REGULATION_OF_CYCLIC_NUCLEOTIDE_PHOSPHODIESTERASE_ACTIVITY	4.17855	8.01245e-05	0.00445182	RGN,CALM1,CALM3,RACK1,CALM2
3.AD/0.HA	GABA_neurons	Down	GO BP	GOBP_GLYCOLYTIC_PROCESS_THROUGH_FRUCTOSE_6_PHOSPHATE	GOBP_GLYCOLYTIC_PROCESS_THROUGH_FRUCTOSE_6_PHOSPHATE	2.7903	9.01911e-05	0.00496051	ENO1,GAPDH,PGM2L1,ALDOC,PGAM1,ENO2,PFKM,TPI1
3.AD/0.HA	GABA_neurons	Down	GO BP	GOBP_AUTOPHAGY_OF_MITOCHONDRION	GOBP_AUTOPHAGY_OF_MITOCHONDRION	1.95755	0.000113502	0.00618021	PARK7,PINK1,GABARAP,MAP1LC3A,CDC37,GABARAPL2,FUNDC1,GABARAPL1,CISD2,TOMM7,ATG9A,MAP1LC3B,ATP5IF1
3.AD/0.HA	GABA_neurons	Down	GO BP	GOBP_NCRNA_PROCESSING	GOBP_NCRNA_PROCESSING	1.03539	0.000120018	0.00647029	RPS6,RPL5,RPL11,RPS14,RPS15,RPS27,RPS28,RPL26,TRMT112,NOP10,RPUSD4,RPL35,RPL10A,RPL7,RPL7A,RPL27,RPL35A,RPS2,RPS7,RPS8,RPS9,RPS16,RPS17,RPS21,RPS24,RPS25,RPL14,CPSF4,SNU13,RTCB,LAS1L,TSR2,PIH1D1,POP7,IMP3,OSGEP,OSGEPL1,LAGE3,IMP4
3.AD/0.HA	GABA_neurons	Down	GO BP	GOBP_NUCLEOBASE_CONTAINING_SMALL_MOLECULE_METABOLIC_PROCESS	GOBP_NUCLEOBASE_CONTAINING_SMALL_MOLECULE_METABOLIC_PROCESS	0.86432	0.000125033	0.00667454	PARK7,DLD,HMGCS1,NPPC,AAAS,ACOT4,TECR,ATP6V0C,ENO1,TDG,PRKAA1,PINK1,GAPDH,PGM2L1,HPCA,MPC2,NME1,NME2,ALDOC,STOML2,PGAM1,NAPRT,NAXE,ENO2,GALT,PFKM,TPI1,DPAGT1,PMVK,NUDT10,NUDT11,MCCC2,ATP5PD,ATP5F1D,ATP5F1E,ATP5MC1,ATP5MC2,ATP5MC3,ATP5ME,ATP5PF,ATP5PO,UQCC3,ATP5MF,GDA,AK1,NME3,ERH,TK2,UPP1,RFK,HINT1,GUK1,AK6,PDE5A
3.AD/0.HA	GABA_neurons	Down	GO BP	GOBP_REGULATION_OF_CELLULAR_PROTEIN_CATABOLIC_PROCESS	GOBP_REGULATION_OF_CELLULAR_PROTEIN_CATABOLIC_PROCESS	1.2313	0.000129746	0.00685892	BCAP31,PARK7,HSP90AB1,PITHD1,UBB,RGN,RPL5,RPL11,CDK5RAP3,RPL23,SH3RF2,ARAF,PSME1,PINK1,CD81,RPS7,STUB1,VPS35,RACK1,GABARAPL2,ATP5IF1,TAF9,CLU,DDRGK1,PDCL3,RAD23A,ELOB,CAMLG
3.AD/0.HA	GABA_neurons	Down	GO BP	GOBP_NEGATIVE_REGULATION_OF_AMYLOID_FIBRIL_FORMATION	GOBP_NEGATIVE_REGULATION_OF_AMYLOID_FIBRIL_FORMATION	3.91579	0.000140536	0.00732498	CLU,PFDN6,PFDN4,PFDN5,VBP1
3.AD/0.HA	GABA_neurons	Down	GO BP	GOBP_PROCESS_UTILIZING_AUTOPHAGIC_MECHANISM	GOBP_PROCESS_UTILIZING_AUTOPHAGIC_MECHANISM	0.918475	0.000141253	0.00732498	PARK7,DCN,PSAP,DYNLL1,MT3,ATP6V1B2,ATP6V0C,ATP6V0B,ATP6V1G1,CDK5,KAT5,LAMTOR2,LAMTOR1,PRKAA1,PINK1,UCHL1,STUB1,GABARAP,GAPDH,CDK5R1,VPS35,POLDIP2,MAP1LC3A,HSPA8,CDC37,GABARAPL2,FUNDC1,GABARAPL1,CISD2,TOMM7,ATG9A,MAP1LC3B,ATP5IF1,CLU,LAMTOR5,RRAGA,TOMM20,DDRGK1,EEF1A1,CAPN1,DYNLL2,TMEM208,VPS28,TOMM5,EMC6,UFC1,DEPP1,SCOC,TOMM6
3.AD/0.HA	GABA_neurons	Down	GO BP	GOBP_PURINE_CONTAINING_COMPOUND_METABOLIC_PROCESS	GOBP_PURINE_CONTAINING_COMPOUND_METABOLIC_PROCESS	0.968041	0.00014576	0.00748738	DLD,HMGCS1,NPPC,AAAS,ACOT4,TECR,ATP6V0C,ENO1,PRKAA1,PINK1,GAPDH,PGM2L1,HPCA,MPC2,NME1,NME2,ALDOC,STOML2,PGAM1,ENO2,PFKM,TPI1,PMVK,NUDT10,NUDT11,MCCC2,ATP5PD,ATP5F1D,ATP5F1E,ATP5MC1,ATP5MC2,ATP5MC3,ATP5ME,ATP5PF,ATP5PO,UQCC3,ATP5MF,GDA,AK1,NME3,HINT1,GUK1,PDE5A
3.AD/0.HA	GABA_neurons	Down	GO BP	GOBP_NEGATIVE_REGULATION_OF_UBIQUITIN_DEPENDENT_PROTEIN_CATABOLIC_PROCESS	GOBP_NEGATIVE_REGULATION_OF_UBIQUITIN_DEPENDENT_PROTEIN_CATABOLIC_PROCESS	2.2584	0.000161547	0.00822076	PARK7,HSP90AB1,RPL5,RPL11,RPL23,RPS7,TAF9,DDRGK1,PDCL3,CAMLG
3.AD/0.HA	GABA_neurons	Down	GO BP	GOBP_MITOCHONDRIAL_TRANSLATION	GOBP_MITOCHONDRIAL_TRANSLATION	1.52836	0.00018847	0.00950204	RPUSD4,AURKAIP1,MRPS36,NDUFA7,CHCHD1,MRPL21,MRPL46,MRPL51,MRPL27,MRPS21,MRPL16,MRPS12,MRPL34,MRPS34,TUFM,MRPL57,MRPL43,COA3
3.AD/0.HA	GABA_neurons	Down	GO BP	GOBP_CELLULAR_COMPONENT_DISASSEMBLY	GOBP_CELLULAR_COMPONENT_DISASSEMBLY	0.885643	0.000192348	0.0096086	PARK7,CDK5RAP3,CDK5,RPL23,DCTN1,TRMT112,DVL2,CX3CL1,PINK1,CFL1,STMN2,GABARAP,SPEF1,STMN1,STMN3,PPP1CA,AURKAIP1,MAP1LC3A,HSPA8,CDC37,GABARAPL2,FUNDC1,GABARAPL1,CISD2,TOMM7,ATG9A,MAP1LC3B,ATP5IF1,DDRGK1,CST3,CTSL,CAPN1,MRPS36,HMGA1,SMARCE1,CHCHD1,MRPL21,MRPL46,MRPL51,MRPL27,MRPS21,MRPL16,MRPS12,MRPL34,MRPS34,MRPL57,MRPL43,BLCAP,DSTN,UFC1
3.AD/0.HA	GABA_neurons	Down	GO BP	GOBP_MITOCHONDRIAL_TRANSLATIONAL_TERMINATION	GOBP_MITOCHONDRIAL_TRANSLATIONAL_TERMINATION	1.76666	0.000213337	0.0105602	AURKAIP1,MRPS36,CHCHD1,MRPL21,MRPL46,MRPL51,MRPL27,MRPS21,MRPL16,MRPS12,MRPL34,MRPS34,MRPL57,MRPL43
3.AD/0.HA	GABA_neurons	Down	GO BP	GOBP_CELLULAR_RESPONSE_TO_NITROGEN_STARVATION	GOBP_CELLULAR_RESPONSE_TO_NITROGEN_STARVATION	3.69339	0.000230503	0.0112296	GABARAP,MAP1LC3A,GABARAPL2,GABARAPL1,MAP1LC3B
3.AD/0.HA	GABA_neurons	Down	GO BP	GOBP_NEGATIVE_REGULATION_OF_INTRINSIC_APOPTOTIC_SIGNALING_PATHWAY	GOBP_NEGATIVE_REGULATION_OF_INTRINSIC_APOPTOTIC_SIGNALING_PATHWAY	1.74746	0.00024064	0.0115954	PARK7,VDAC2,ENO1,PPIA,PINK1,CDKN2D,PPIF,TAF9,CLU,HYOU1,NDUFS3,NDUFA13,TPT1,GRINA
3.AD/0.HA	GABA_neurons	Down	GO BP	GOBP_REGULATION_OF_PROTEIN_CATABOLIC_PROCESS	GOBP_REGULATION_OF_PROTEIN_CATABOLIC_PROCESS	1.00294	0.000249327	0.0119087	BCAP31,PARK7,HSP90AB1,PITHD1,UBB,RGN,NDFIP1,RPL5,RPL11,CDK5RAP3,RPL23,SH3RF2,ARAF,PIN1,PSME1,PINK1,CD81,RPS7,STUB1,VPS35,RACK1,GABARAPL2,ATP5IF1,TAF9,CLU,DDRGK1,GPC3,CST3,EEF1A1,PDCL3,C4BPA,OAZ1,NDUFA13,RAD23A,ELOB,VPS28,CAMLG
3.AD/0.HA	GABA_neurons	Down	GO BP	GOBP_REGULATION_OF_PROTEOLYSIS	GOBP_REGULATION_OF_PROTEOLYSIS	0.788094	0.00026088	0.0123521	BCAP31,SPINT2,PARK7,HSP90AB1,CCN1,SERPINF1,PITHD1,PZP,UBB,RGN,RPL5,RPL11,MT3,CDK5,ENO1,RPL23,ARL6IP5,SH3RF2,FN1,ARAF,PEBP1,CAMK2N1,PSMA3,PSME1,RPS3,PINK1,THBS1,RPS7,STUB1,GAPDH,CDKN2D,AURKAIP1,RACK1,PRDX5,GABARAPL2,ATP5IF1,PIH1D1,TAF9,CLU,EFNA3,CCK,LAMTOR5,ECM1,DDRGK1,GPC3,CST3,CSTB,PRNP,F3,PDCD5,PDCL3,PCSK1N,ARL6IP1,NDUFA13,RAD23A,ELOB,MTCH1,BEX3,NEDD8,CAMLG
3.AD/0.HA	GABA_neurons	Down	GO BP	GOBP_APOPTOTIC_MITOCHONDRIAL_CHANGES	GOBP_APOPTOTIC_MITOCHONDRIAL_CHANGES	1.58958	0.00027281	0.0128056	SLC25A4,VDAC2,PINK1,YWHAB,VPS35,PPIF,ATP5IF1,CLU,YWHAH,CCK,CHCHD10,MLLT11,PDCD5,SLC25A5,TMEM14A,RHOT2
3.AD/0.HA	GABA_neurons	Down	GO BP	GOBP_REGULATION_OF_CELLULAR_CATABOLIC_PROCESS	GOBP_REGULATION_OF_CELLULAR_CATABOLIC_PROCESS	0.719342	0.000320294	0.014906	BCAP31,PARK7,DCN,MEIOC,HSP90AB1,DND1,PSAP,PITHD1,UBB,RGN,RPL5,RPL11,MT3,ATP6V1B2,ATP6V0C,ATP6V0B,ATP6V1G1,CDK5RAP3,CDK5,KAT5,RPS27A,UBA52,UBC,RPL23,SH3RF2,LAMTOR2,ARAF,LAMTOR1,PRKAA1,PSMA3,PSMA7,PSMB1,PSMB6,PSMB10,PSME1,PINK1,UCHL1,YWHAB,CD81,RPS7,STUB1,GAPDH,CDK5R1,VPS35,PPP1CA,POLDIP2,APEX1,RACK1,CIRBP,HSPA8,GABARAPL2,CISD2,ATP5IF1,TAF9,CLU,LAMTOR5,RRAGA,DDRGK1,CST3,EEF1A1,PGAM1,CAPN1,PDCL3,RAD…
3.AD/0.HA	GABA_neurons	Down	GO BP	GOBP_ANAPHASE_PROMOTING_COMPLEX_DEPENDENT_CATABOLIC_PROCESS	GOBP_ANAPHASE_PROMOTING_COMPLEX_DEPENDENT_CATABOLIC_PROCESS	1.7789	0.00032833	0.0151505	UBB,ANAPC15,ANAPC11,RPS27A,UBA52,UBC,PSMA3,PSMA7,PSMB1,PSMB6,PSMB10,PSME1,UBE2S
3.AD/0.HA	GABA_neurons	Down	GO BP	GOBP_REGULATION_OF_DNA_TEMPLATED_TRANSCRIPTION_IN_RESPONSE_TO_STRESS	GOBP_REGULATION_OF_DNA_TEMPLATED_TRANSCRIPTION_IN_RESPONSE_TO_STRESS	1.55996	0.000334264	0.0152947	UBB,MT3,BACH1,RPS27A,UBA52,UBC,PSMA3,PSMA7,PSMB1,PSMB6,PSMB10,PSME1,ELOC,ELOB,HIGD1A,ATF6B
3.AD/0.HA	GABA_neurons	Down	GO BP	GOBP_NEGATIVE_REGULATION_OF_PROTEOLYSIS_INVOLVED_IN_CELLULAR_PROTEIN_CATABOLIC_PROCESS	GOBP_NEGATIVE_REGULATION_OF_PROTEOLYSIS_INVOLVED_IN_CELLULAR_PROTEIN_CATABOLIC_PROCESS	1.97239	0.000344129	0.0156148	PARK7,HSP90AB1,RPL5,RPL11,RPL23,RPS7,GABARAPL2,TAF9,DDRGK1,PDCL3,CAMLG
3.AD/0.HA	GABA_neurons	Down	GO BP	GOBP_SMALL_MOLECULE_BIOSYNTHETIC_PROCESS	GOBP_SMALL_MOLECULE_BIOSYNTHETIC_PROCESS	0.782783	0.000370634	0.0166761	PARK7,GPX4,HMGCS1,RBP4,SOD1,RGN,ACOT4,TECR,CDO1,ENO1,TDG,NR1D1,GSTP1,PRKAA1,CEACAM1,GAPDH,EBP,INSIG1,PAH,ALDH1A2,FABP5,PTGES2,NME1,NME2,ALDOC,ASAH1,PGAM1,DEGS1,GOT1,ENO2,MDH1,MDH2,COQ3,TPI1,PMVK,NUDT10,FDPS,IDI1,PCBD1,BCO1,NUDT11,MSMO1,SC5D,TM7SF2,DHDDS,LIPI,FADS3,NDUFAB1,UROS,COQ10A,GDA,NME3,TK2,UPP1,RFK,HINT1,PDE5A
3.AD/0.HA	GABA_neurons	Down	GO BP	GOBP_GLUCOSE_CATABOLIC_PROCESS	GOBP_GLUCOSE_CATABOLIC_PROCESS	2.42757	0.000373643	0.0166761	ENO1,GAPDH,PGM2L1,ALDOC,PGAM1,ENO2,PFKM,TPI1
3.AD/0.HA	GABA_neurons	Down	GO BP	GOBP_TRANSLATIONAL_TERMINATION	GOBP_TRANSLATIONAL_TERMINATION	1.60349	0.000380312	0.0167	TRMT112,AURKAIP1,MRPS36,CHCHD1,MRPL21,MRPL46,MRPL51,MRPL27,MRPS21,MRPL16,MRPS12,MRPL34,MRPS34,MRPL57,MRPL43
3.AD/0.HA	GABA_neurons	Down	GO BP	GOBP_ORGANELLE_DISASSEMBLY	GOBP_ORGANELLE_DISASSEMBLY	1.60349	0.000380312	0.0167	PARK7,PINK1,GABARAP,MAP1LC3A,CDC37,GABARAPL2,FUNDC1,GABARAPL1,CISD2,TOMM7,ATG9A,MAP1LC3B,ATP5IF1,DDRGK1,UFC1
3.AD/0.HA	GABA_neurons	Down	GO BP	GOBP_STEROL_BIOSYNTHETIC_PROCESS	GOBP_STEROL_BIOSYNTHETIC_PROCESS	1.84026	0.000391789	0.0170663	HMGCS1,SOD1,PRKAA1,EBP,INSIG1,CYB5R1,PMVK,FDPS,IDI1,MSMO1,SC5D,TM7SF2
3.AD/0.HA	GABA_neurons	Down	GO BP	GOBP_NEGATIVE_REGULATION_OF_CELLULAR_PROTEIN_CATABOLIC_PROCESS	GOBP_NEGATIVE_REGULATION_OF_CELLULAR_PROTEIN_CATABOLIC_PROCESS	1.81671	0.00044565	0.0192585	PARK7,HSP90AB1,RPL5,RPL11,CDK5RAP3,RPL23,RPS7,GABARAPL2,TAF9,DDRGK1,PDCL3,CAMLG
3.AD/0.HA	GABA_neurons	Down	GO BP	GOBP_SMALL_MOLECULE_METABOLIC_PROCESS	GOBP_SMALL_MOLECULE_METABOLIC_PROCESS	0.517885	0.000449558	0.0192744	PARK7,DLD,GPX4,HMGCS1,NPPC,RBP4,SOD1,AAAS,RGN,ACOT4,TECR,ISCU,MT3,ATP6V0C,CDO1,MMUT,CRYM,ENO1,TDG,TXN,NR1D1,GSTP1,PRKAA1,PSMA3,PSMA7,PSMB1,PSMB6,PSMB10,PSME1,CEACAM1,PINK1,CALM1,GAPDH,PGM2L1,PPP1CA,HPCA,EBP,INSIG1,PEX7,GAD2,PAH,PDZD11,ALDH1A2,FABP5,PDXDC1,PTGES2,MPC2,NME1,NME2,ALDOC,STOML2,ASAH1,PGAM1,DEGS1,NAPRT,NAXE,ADH5,GNB3,SCPEP1,GOT1,ENO2,GALT,LDHB,IDNK,MDH1,MDH2,COQ3,PFKM,TPI1,DPAGT1,CMAS,…
3.AD/0.HA	GABA_neurons	Down	GO BP	GOBP_ISOPRENOID_BIOSYNTHETIC_PROCESS	GOBP_ISOPRENOID_BIOSYNTHETIC_PROCESS	2.59621	0.000484821	0.0206238	HMGCS1,ALDH1A2,PMVK,FDPS,IDI1,BCO1,DHDDS
3.AD/0.HA	GABA_neurons	Down	GO BP	GOBP_MITOCHONDRIAL_GENE_EXPRESSION	GOBP_MITOCHONDRIAL_GENE_EXPRESSION	1.35408	0.000503441	0.0212499	RPUSD4,PRKAA1,AURKAIP1,CHCHD10,MRPS36,NDUFA7,CHCHD1,MRPL21,MRPL46,MRPL51,MRPL27,MRPS21,MRPL16,MRPS12,MRPL34,MRPS34,TUFM,MRPL57,MRPL43,COA3
3.AD/0.HA	GABA_neurons	Down	GO BP	GOBP_NEGATIVE_REGULATION_OF_APOPTOTIC_SIGNALING_PATHWAY	GOBP_NEGATIVE_REGULATION_OF_APOPTOTIC_SIGNALING_PATHWAY	1.20199	0.000520292	0.0216604	PARK7,VDAC2,ENO1,GSTP1,PPIA,STRADB,CX3CL1,PINK1,PRDX2,THBS1,PEA15,CDKN2D,PPIF,PIH1D1,TAF9,CLU,IL7,SLC25A5,HYOU1,NDUFS3,NDUFA13,TPT1,TMEM14A,GRINA
3.AD/0.HA	GABA_neurons	Down	GO BP	GOBP_REGULATION_OF_PEPTIDE_TRANSPORT	GOBP_REGULATION_OF_PEPTIDE_TRANSPORT	0.810677	0.000521122	0.0216604	SLC25A4,BCAP31,PARK7,HSP90AB1,RBP4,SFRP1,DYNLL1,NDFIP1,CDK5,PPID,TXN,NR1D1,ERP29,PPIA,CAMK2N1,PRKAA1,PINK1,YWHAB,CD81,CDK5R1,ARF1,RACK1,HSPA8,UBL5,TOMM7,ATP5IF1,ITGB3,YWHAH,HPCA,INSIG1,VAMP2,SRI,MPC2,PHPT1,VSNL1,CHGA,CD200,TMEM30A,PRNP,SELENOK,PDCD5,SAR1B,SLC25A5,SLC25A6,ENHO,NNAT,B3GAT3,OAZ1,VPS28
3.AD/0.HA	GABA_neurons	Down	GO BP	GOBP_POSITIVE_REGULATION_OF_SEQUESTERING_OF_CALCIUM_ION	GOBP_POSITIVE_REGULATION_OF_SEQUESTERING_OF_CALCIUM_ION	3.33079	0.000533467	0.0217723	CALM1,CALM3,CALM2,SRI,MTLN
3.AD/0.HA	GABA_neurons	Down	GO BP	GOBP_REGULATION_OF_AMYLOID_FIBRIL_FORMATION	GOBP_REGULATION_OF_AMYLOID_FIBRIL_FORMATION	3.33079	0.000533467	0.0217723	CLU,PFDN6,PFDN4,PFDN5,VBP1
3.AD/0.HA	GABA_neurons	Down	GO BP	GOBP_REGULATION_OF_CATABOLIC_PROCESS	GOBP_REGULATION_OF_CATABOLIC_PROCESS	0.648	0.000535811	0.0217723	BCAP31,PARK7,DCN,MEIOC,HSP90AB1,DND1,PSAP,PITHD1,UBB,AAAS,RGN,NDFIP1,RPL5,RPL11,MT3,ATP6V1B2,ATP6V0C,ATP6V0B,ATP6V1G1,CDK5RAP3,CDK5,KAT5,RPS27A,UBA52,UBC,RPL23,SH3RF2,LAMTOR2,ARAF,PIN1,LAMTOR1,PRKAA1,PSMA3,PSMA7,PSMB1,PSMB6,PSMB10,PSME1,PINK1,UCHL1,YWHAB,CD81,RPS7,STUB1,GAPDH,CDK5R1,VPS35,PPP1CA,POLDIP2,APEX1,RACK1,CIRBP,HSPA8,GABARAPL2,CISD2,ATP5IF1,TAF9,CLU,LAMTOR5,RRAGA,DDRGK1,GPC3,BSCL2,CST3,…
3.AD/0.HA	GABA_neurons	Down	GO BP	GOBP_CATION_TRANSPORT	GOBP_CATION_TRANSPORT	0.612163	0.000549897	0.02204	MAGED2,PARK7,RAB3A,RGN,NDFIP1,ISCU,FTH1,FTL,MT3,ATOX1,SLC22A17,ATP6V1B2,ATP6V0C,ATP6V0B,ATP6AP1,B2M,SLC39A10,SLC30A3,SLC39A7,ATP6V1F,ATP6V1G1,CDK5,NEFL,CX3CL1,PINK1,CALM1,ARF1,CALM3,PPIF,ITGB3,SYT4,THY1,YWHAH,CALM2,HPCA,SLC32A1,SNCG,VAMP2,ATP1B1,SCN7A,SRI,COMMD3,COMMD9,STOML2,PRNP,SELENOK,CAPN1,CD63,NKAIN4,COX7A1,COX7A2,SARAF,SLC38A4,SLC6A7,SLC22A4,PM20D1,ATP5PD,COX4I1,COX6A1,COX6B1,COX6C,COX7B,C…
3.AD/0.HA	GABA_neurons	Down	GO BP	GOBP_ORGANOPHOSPHATE_BIOSYNTHETIC_PROCESS	GOBP_ORGANOPHOSPHATE_BIOSYNTHETIC_PROCESS	0.812942	0.00055693	0.0221349	DLD,HMGCS1,NPPC,TECR,ATP6V0C,ENO1,PINK1,ARF1,CPNE6,HPCA,FABP5,MPC2,NME1,NME2,STOML2,NAPRT,NAXE,TPI1,DPAGT1,PMVK,FDPS,IDI1,DHDDS,DPM2,CKB,LIPI,FABP3,CKMT1A,ATP5PD,ATP5F1D,ATP5F1E,ATP5MC1,ATP5MC2,ATP5MC3,ATP5ME,ATP5PF,ATP5PO,UQCC3,ATP5MF,AK1,NME3,TK2,UPP1,PYURF,PIGG,SERINC1,ARF3,RFK,GUK1,AK6
3.AD/0.HA	GABA_neurons	Down	GO BP	GOBP_NEGATIVE_REGULATION_OF_PROTEOLYSIS	GOBP_NEGATIVE_REGULATION_OF_PROTEOLYSIS	1.00891	0.000586767	0.0231518	SPINT2,PARK7,HSP90AB1,SERPINF1,PZP,RPL5,RPL11,MT3,CDK5,RPL23,PEBP1,CAMK2N1,THBS1,RPS7,GAPDH,CDKN2D,PRDX5,GABARAPL2,PIH1D1,TAF9,LAMTOR5,ECM1,DDRGK1,GPC3,CST3,CSTB,PRNP,PDCL3,PCSK1N,ARL6IP1,BEX3,CAMLG
3.AD/0.HA	GABA_neurons	Down	GO BP	GOBP_PROTEIN_CONTAINING_COMPLEX_DISASSEMBLY	GOBP_PROTEIN_CONTAINING_COMPLEX_DISASSEMBLY	1.00388	0.000607122	0.0236127	RPL23,TRMT112,DVL2,CFL1,STMN2,GABARAP,SPEF1,STMN1,STMN3,PPP1CA,AURKAIP1,MAP1LC3A,HSPA8,GABARAPL2,GABARAPL1,MAP1LC3B,MRPS36,HMGA1,SMARCE1,CHCHD1,MRPL21,MRPL46,MRPL51,MRPL27,MRPS21,MRPL16,MRPS12,MRPL34,MRPS34,MRPL57,MRPL43,DSTN
3.AD/0.HA	GABA_neurons	Down	GO BP	GOBP_POSITIVE_REGULATION_OF_ESTABLISHMENT_OF_PROTEIN_LOCALIZATION	GOBP_POSITIVE_REGULATION_OF_ESTABLISHMENT_OF_PROTEIN_LOCALIZATION	1.00388	0.000607122	0.0236127	BCAP31,HSP90AB1,RBP4,DYNLL1,CDK5,PPID,PPIA,CAMK2N1,PRKAA1,PINK1,YWHAB,CD81,CDK5R1,ARF1,RACK1,UBL5,TOMM7,YWHAH,HPCA,VAMP2,SRI,MPC2,PHPT1,VSNL1,TMEM30A,PRNP,PDCD5,SAR1B,NNAT,B3GAT3,OAZ1,VPS28
3.AD/0.HA	GABA_neurons	Down	GO BP	GOBP_PROTEIN_CATABOLIC_PROCESS	GOBP_PROTEIN_CATABOLIC_PROCESS	0.653253	0.000658358	0.025353	BCAP31,PARK7,HSP90AB1,PITHD1,UBB,RGN,NDFIP1,RPL5,RPL11,ANAPC15,ANAPC11,CDK5RAP3,KAT5,RPS27A,UBA52,UBC,RPL23,NR1D1,SH3RF2,ARAF,PIN1,PSMA3,PSMA7,PSMB1,PSMB6,PSMB10,PSME1,CEACAM1,SKP1,PINK1,UCHL1,CD81,RPS7,STUB1,RNF187,RNF167,UBE2S,FBXL15,VPS35,TOM1L1,RACK1,HSPA8,GABARAPL2,ATP5IF1,TAF9,CLU,DDRGK1,GPC3,AP2M1,AP2S1,CST3,CTSL,EEF1A1,PDCL3,C4BPA,CTSF,OGA,OAZ1,NDUFA13,RAD23A,ELOC,ELOB,ZFAND2B,NEDD8,VPS28…
3.AD/0.HA	GABA_neurons	Down	GO BP	GOBP_NEGATIVE_REGULATION_OF_PROTEIN_MODIFICATION_BY_SMALL_PROTEIN_CONJUGATION_OR_REMOVAL	GOBP_NEGATIVE_REGULATION_OF_PROTEIN_MODIFICATION_BY_SMALL_PROTEIN_CONJUGATION_OR_REMOVAL	1.65807	0.000661181	0.025353	PARK7,RPL5,RPL11,CDK5,RPL23,SPRY2,SH3RF2,PPIA,RPS3,RPS7,OTUB1,VPS28,CAMLG
3.AD/0.HA	GABA_neurons	Down	GO BP	GOBP_PROTEIN_STABILIZATION	GOBP_PROTEIN_STABILIZATION	1.24437	0.00068894	0.0261113	PARK7,HSP90AB1,RPL5,RPL11,MT3,RPL23,PIN1,PINK1,RPS7,GAPDH,PPIB,CDC37,TAF9,CLU,ATP1B1,PFN1,PFN2,RABL3,PDCL3,CAMLG,IFT46
3.AD/0.HA	GABA_neurons	Down	GO BP	GOBP_CELLULAR_RESPONSE_TO_OXYGEN_LEVELS	GOBP_CELLULAR_RESPONSE_TO_OXYGEN_LEVELS	1.15669	0.000693483	0.0261113	SFRP1,UBB,MT3,ATP6AP1,ATP6V1G1,BACH1,ENO1,RPS27A,UBA52,UBC,PRKAA1,PSMA3,PSMA7,PSMB1,PSMB6,PSMB10,PSME1,PINK1,STUB1,HYOU1,CHCHD2,ELOC,ELOB,HIGD1A
3.AD/0.HA	GABA_neurons	Down	GO BP	GOBP_POSITIVE_REGULATION_OF_ATPASE_ACTIVITY	GOBP_POSITIVE_REGULATION_OF_ATPASE_ACTIVITY	1.95144	0.000695342	0.0261113	DNAJC19,RAB3A,DYNLL1,RGN,GABARAPL2,ATP1B1,PFN1,PFN2,DYNLL2,DNAJA2
3.AD/0.HA	GABA_neurons	Down	GO BP	GOBP_TRANSMEMBRANE_TRANSPORT	GOBP_TRANSMEMBRANE_TRANSPORT	0.532494	0.000701123	0.0261481	SLC25A4,SLC25A36,PARK7,DNAJC19,UBB,VDAC2,RGN,ISCU,SLC22A17,ATP6V1B2,ATP6V0C,ATP6V0B,ATP6AP1,SLC39A10,SLC30A3,SLC39A7,ATP6V1F,ATP6V1G1,CDK5,RPS27A,UBA52,UBC,ARL6IP5,NEFL,PSMA3,PSMA7,PSMB1,PSMB6,PSMB10,PSME1,CX3CL1,PINK1,THBS1,CALM1,PEA15,ARF1,CALM3,PPIF,HSPA8,TOMM7,CLU,S100A6,THY1,YWHAH,CALM2,HPCA,GLRA3,TOMM20,PEX7,GPC3,SLC32A1,PDZD11,VAMP2,SV2A,ATP1B1,SCN7A,SLC4A3,SRI,FABP5,MPC2,STOML2,TMEM30A,PR…
3.AD/0.HA	GABA_neurons	Down	GO BP	GOBP_PROTEASOMAL_UBIQUITIN_INDEPENDENT_PROTEIN_CATABOLIC_PROCESS	GOBP_PROTEASOMAL_UBIQUITIN_INDEPENDENT_PROTEIN_CATABOLIC_PROCESS	2.76475	0.000748401	0.027167	PSMA3,PSMA7,PSMB1,PSMB6,PSMB10,ENC1
3.AD/0.HA	GABA_neurons	Down	GO BP	GOBP_MITOCHONDRIAL_DEPOLARIZATION	GOBP_MITOCHONDRIAL_DEPOLARIZATION	2.76475	0.000748401	0.027167	DCN,RACK1,ATP5IF1,CCK,MLLT11,GOT1
3.AD/0.HA	GABA_neurons	Down	GO BP	GOBP_ERROR_FREE_TRANSLESION_SYNTHESIS	GOBP_ERROR_FREE_TRANSLESION_SYNTHESIS	2.76475	0.000748401	0.027167	UBB,RPS27A,UBA52,UBC,POLDIP2,RPA3
3.AD/0.HA	GABA_neurons	Down	GO BP	GOBP_POSITIVE_REGULATION_OF_SIGNAL_TRANSDUCTION_BY_P53_CLASS_MEDIATOR	GOBP_POSITIVE_REGULATION_OF_SIGNAL_TRANSDUCTION_BY_P53_CLASS_MEDIATOR	2.76475	0.000748401	0.027167	UBB,RPL11,RPL26,CDK5RAP3,RPL23,RPS7
3.AD/0.HA	GABA_neurons	Down	GO BP	GOBP_MITOCHONDRIAL_RESPIRASOME_ASSEMBLY	GOBP_MITOCHONDRIAL_RESPIRASOME_ASSEMBLY	3.85561	0.000772427	0.0278534	COX7A1,COX7A2,HIGD1A,RAB5IF
3.AD/0.HA	GABA_neurons	Down	GO BP	GOBP_CELLULAR_IRON_ION_HOMEOSTASIS	GOBP_CELLULAR_IRON_ION_HOMEOSTASIS	1.81126	0.000779158	0.0279113	SOD1,NDFIP1,ISCU,FTH1,FTL,SLC22A17,ATP6AP1,ATP6V1G1,SKP1,SRI,NEDD8
3.AD/0.HA	GABA_neurons	Down	GO BP	GOBP_REGULATION_OF_MACROAUTOPHAGY	GOBP_REGULATION_OF_MACROAUTOPHAGY	1.3197	0.000831396	0.0295879	DCN,ATP6V1B2,ATP6V0C,ATP6V0B,ATP6V1G1,CDK5,LAMTOR2,LAMTOR1,PRKAA1,PINK1,UCHL1,GAPDH,CDK5R1,VPS35,POLDIP2,LAMTOR5,RRAGA,CAPN1,SCOC
3.AD/0.HA	GABA_neurons	Down	GO BP	GOBP_TRANSITION_METAL_ION_TRANSPORT	GOBP_TRANSITION_METAL_ION_TRANSPORT	1.42033	0.00085306	0.0301618	ISCU,FTH1,FTL,MT3,ATOX1,SLC22A17,ATP6V1B2,ATP6V0C,ATP6V0B,ATP6AP1,B2M,SLC39A10,SLC30A3,SLC39A7,ATP6V1F,ATP6V1G1
3.AD/0.HA	GABA_neurons	Down	GO BP	GOBP_INTRINSIC_APOPTOTIC_SIGNALING_PATHWAY	GOBP_INTRINSIC_APOPTOTIC_SIGNALING_PATHWAY	1.05505	0.000872999	0.0306676	BCAP31,PARK7,NBN,SOD1,UBB,VDAC2,RPL11,RPL26,ENO1,ARL6IP5,ERP29,PPIA,RPS3,PINK1,RPS7,CDKN2D,PPIF,RACK1,TAF9,CLU,SELENOK,MLLT11,HYOU1,NDUFS3,NDUFA13,TPT1,GRINA,HINT1
3.AD/0.HA	GABA_neurons	Down	GO BP	GOBP_REGULATION_OF_TRANSFERASE_ACTIVITY	GOBP_REGULATION_OF_TRANSFERASE_ACTIVITY	0.632348	0.000886592	0.0309455	PIF1,PARK7,HSP90AB1,CCN1,NBN,PRKAR1A,SFRP1,SOD1,UBB,PPP1R1B,RGN,RPL5,RPL11,TRAF7,MT3,CDK5RAP3,CDK5,RPS27A,TXN,UBA52,UBC,RPL23,SPRY2,RASGRP1,ERP29,CHI3L1,DVL2,GNG3,LAMTOR2,GSTP1,ARAF,PIN1,PPIA,STRADB,CAMK2N1,PRKAA1,RPS3,CEACAM1,SKP1,PINK1,PRDX2,THBS1,UBE2V1,UCHL1,YWHAB,CALM1,PABPN1,PEA15,CD81,RPLP1,RPS2,RPS7,STUB1,UBE2S,CDK5R1,TOM1L1,CDKN2D,JTB,CALM3,RACK1,CDC37,PIH1D1,CLU,EPHB6,ITGB3,THY1,CALM2,P…
3.AD/0.HA	GABA_neurons	Down	GO BP	GOBP_REGULATION_OF_ATPASE_ACTIVITY	GOBP_REGULATION_OF_ATPASE_ACTIVITY	1.68291	0.000917081	0.0318058	DNAJC19,RAB3A,DYNLL1,RGN,PPIF,GABARAPL2,ATP5IF1,ATP1B1,PFN1,PFN2,DYNLL2,DNAJA2
3.AD/0.HA	GABA_neurons	Down	GO BP	GOBP_PLATELET_DEGRANULATION	GOBP_PLATELET_DEGRANULATION	1.40686	0.00093061	0.031869	MAGED2,PSAP,SOD1,FN1,THBS1,CALM1,TUBA4A,CLU,ITGB3,SPARC,ECM1,CD63,VEGFB,SCG3,CYB5R1,TMX3
3.AD/0.HA	GABA_neurons	Down	GO BP	GOBP_NUCLEOTIDE_EXCISION_REPAIR_DNA_DAMAGE_RECOGNITION	GOBP_NUCLEOTIDE_EXCISION_REPAIR_DNA_DAMAGE_RECOGNITION	2.67732	0.000967937	0.0327355	CETN2,UBB,RPS27A,UBA52,UBC,COPS6
3.AD/0.HA	GABA_neurons	Down	GO BP	GOBP_REGULATION_OF_UBIQUITIN_PROTEIN_LIGASE_ACTIVITY	GOBP_REGULATION_OF_UBIQUITIN_PROTEIN_LIGASE_ACTIVITY	2.67732	0.000967937	0.0327355	RPL5,RPL11,RPL23,SKP1,RPS7,UBE2S
3.AD/0.HA	GABA_neurons	Down	GO BP	GOBP_CELLULAR_PROTEIN_CATABOLIC_PROCESS	GOBP_CELLULAR_PROTEIN_CATABOLIC_PROCESS	0.689542	0.000990483	0.0332912	BCAP31,PARK7,HSP90AB1,PITHD1,UBB,RGN,NDFIP1,RPL5,RPL11,ANAPC15,ANAPC11,CDK5RAP3,KAT5,RPS27A,UBA52,UBC,RPL23,NR1D1,SH3RF2,ARAF,PSMA3,PSMA7,PSMB1,PSMB6,PSMB10,PSME1,SKP1,PINK1,UCHL1,CD81,RPS7,STUB1,RNF187,RNF167,UBE2S,FBXL15,VPS35,TOM1L1,RACK1,GABARAPL2,ATP5IF1,TAF9,CLU,DDRGK1,AP2M1,AP2S1,CTSL,PDCL3,CTSF,RAD23A,ELOC,ELOB,ZFAND2B,NEDD8,VPS28,JKAMP,RHBDD2,TMUB2,CAMLG,CLPP,USP11,ENC1,SPSB3
3.AD/0.HA	GABA_neurons	Down	GO BP	GOBP_POSITIVE_REGULATION_OF_TRANSFERASE_ACTIVITY	GOBP_POSITIVE_REGULATION_OF_TRANSFERASE_ACTIVITY	0.720377	0.00103961	0.0347282	PARK7,HSP90AB1,CCN1,NBN,PRKAR1A,SOD1,UBB,TRAF7,MT3,CDK5,RPS27A,TXN,UBA52,UBC,SPRY2,RASGRP1,ERP29,CHI3L1,DVL2,GNG3,LAMTOR2,ARAF,PIN1,PPIA,STRADB,PRKAA1,RPS3,SKP1,PINK1,PRDX2,THBS1,UBE2V1,CALM1,PABPN1,PEA15,CD81,RPLP1,RPS2,STUB1,UBE2S,CDK5R1,TOM1L1,JTB,CALM3,PIH1D1,CLU,EPHB6,ITGB3,CALM2,LMO4,CD200,PRNP,MTCP1,CAMKK1,SERINC1
3.AD/0.HA	GABA_neurons	Down	GO BP	GOBP_PROTEIN_TRANSMEMBRANE_TRANSPORT	GOBP_PROTEIN_TRANSMEMBRANE_TRANSPORT	1.86175	0.00105315	0.0347541	DNAJC19,HSPA8,TOMM7,CLU,TOMM20,PEX7,ZFAND2B,SEC61G,PEX10,SEC62
3.AD/0.HA	GABA_neurons	Down	GO BP	GOBP_NEGATIVE_REGULATION_OF_UBIQUITIN_PROTEIN_TRANSFERASE_ACTIVITY	GOBP_NEGATIVE_REGULATION_OF_UBIQUITIN_PROTEIN_TRANSFERASE_ACTIVITY	3.04136	0.00106592	0.0349635	PARK7,RPL5,RPL11,RPL23,RPS7
3.AD/0.HA	GABA_neurons	Down	GO BP	GOBP_PROTEASOMAL_PROTEIN_CATABOLIC_PROCESS	GOBP_PROTEASOMAL_PROTEIN_CATABOLIC_PROCESS	0.836888	0.00109052	0.0355562	BCAP31,PARK7,HSP90AB1,PITHD1,UBB,RPL11,ANAPC15,ANAPC11,KAT5,RPS27A,UBA52,UBC,NR1D1,SH3RF2,ARAF,PSMA3,PSMA7,PSMB1,PSMB6,PSMB10,PSME1,SKP1,PINK1,UCHL1,STUB1,RNF187,UBE2S,FBXL15,RACK1,GABARAPL2,TAF9,CLU,DDRGK1,RAD23A,ELOB,ZFAND2B,JKAMP,RHBDD2,TMUB2,CAMLG,ENC1,SPSB3
3.AD/0.HA	GABA_neurons	Down	GO BP	GOBP_AMYLOID_FIBRIL_FORMATION	GOBP_AMYLOID_FIBRIL_FORMATION	2.59481	0.00123379	0.0397514	B2M,CLU,PFDN6,PFDN4,PFDN5,VBP1
3.AD/0.HA	GABA_neurons	Down	GO BP	GOBP_MAINTENANCE_OF_PROTEIN_LOCALIZATION_IN_ORGANELLE	GOBP_MAINTENANCE_OF_PROTEIN_LOCALIZATION_IN_ORGANELLE	2.09432	0.0013531	0.0425876	PARK7,CDK5,TXN,SKP1,PINK1,CHCHD10,INSIG1,KDELR3
3.AD/0.HA	GABA_neurons	Down	GO BP	GOBP_NCRNA_METABOLIC_PROCESS	GOBP_NCRNA_METABOLIC_PROCESS	0.831541	0.00140666	0.0440187	RPS6,RPL5,RPL11,RPS14,RPS15,RPS27,RPS28,RPL26,TRMT112,NOP10,RPUSD4,RPL35,RPL10A,RPL7,RPL7A,RPL27,RPL35A,RPS2,RPS7,RPS8,RPS9,RPS16,RPS17,RPS21,RPS24,RPS25,RPL14,CPSF4,SNU13,RTCB,LAS1L,TSR2,PIH1D1,POP7,AARSD1,IMP3,OSGEP,OSGEPL1,LAGE3,IMP4,TRIR
3.AD/0.HA	GABA_neurons	Down	GO BP	GOBP_IRON_ION_HOMEOSTASIS	GOBP_IRON_ION_HOMEOSTASIS	1.60009	0.00141983	0.0440623	SOD1,NDFIP1,ISCU,FTH1,FTL,SLC22A17,ATP6AP1,B2M,ATP6V1G1,SKP1,SRI,NEDD8
3.AD/0.HA	GABA_neurons	Down	GO BP	GOBP_POSITIVE_REGULATION_OF_APOPTOTIC_SIGNALING_PATHWAY	GOBP_POSITIVE_REGULATION_OF_APOPTOTIC_SIGNALING_PATHWAY	1.39356	0.00143115	0.0440623	BCAP31,PARK7,SFRP1,SOD1,UBB,RPL11,TRAF7,RPL26,RPS3,THBS1,PEA15,RPS7,PPP1CA,RACK1,ITM2C
3.AD/0.HA	GABA_neurons	Down	GO BP	GOBP_EXOCYTOSIS	GOBP_EXOCYTOSIS	0.629078	0.00143233	0.0440623	MAGED2,HSP90AB1,MGST1,PSAP,RAB3A,SOD1,DYNLL1,FTH1,FTL,ATP6V0C,ATP6AP1,B2M,CDK5,ATP6AP2,CHI3L1,FN1,LAMTOR2,GSTP1,PPIA,LAMTOR1,PSMB1,CEACAM1,THBS1,CALM1,TUBB4B,TUBA4A,ARF1,CALM3,HSPA8,CLU,ITGB3,SPARC,SYT4,ECM1,STX19,VAMP2,SV2A,FABP5,PTGES2,NME2,VSNL1,PGRMC1,CHGA,CST3,CSTB,EEF1A1,ALDOC,COMMD3,COMMD9,HLA-C,ASAH1,NDUFC2,PGAM1,TMEM30A,TRAPPC1,SRP14,CAPN1,CYSTM1,DEGS1,GGH,NAPRT,CD63,VEGFB,TNFAIP2,SCG3,C…
3.AD/0.HA	GABA_neurons	Down	GO BP	GOBP_REGULATION_OF_CHOLESTEROL_BIOSYNTHETIC_PROCESS	GOBP_REGULATION_OF_CHOLESTEROL_BIOSYNTHETIC_PROCESS	2.05244	0.00158706	0.048548	HMGCS1,SOD1,PRKAA1,PMVK,FDPS,IDI1,SC5D,TM7SF2
3.AD/0.HA	GABA_neurons	Down	GO BP	GOBP_REGULATION_OF_ANION_TRANSPORT	GOBP_REGULATION_OF_ANION_TRANSPORT	0.652576	0.0016294	0.0495648	SLC25A4,BCAP31,PARK7,HSP90AB1,RAB3A,RBP4,SFRP1,TAC1,DYNLL1,NDFIP1,CDK5,PPID,TXN,NR1D1,ARL6IP5,ERP29,PPIA,LAMTOR1,CAMK2N1,PRKAA1,PINK1,THBS1,YWHAB,PEA15,CD81,CDK5R1,ARF1,RACK1,HSPA8,UBL5,TOMM7,ATP5IF1,ITGB3,SYT4,YWHAH,CCK,HPCA,INSIG1,GPC3,SNCG,VAMP2,SV2A,SRI,FABP5,MPC2,PHPT1,VSNL1,CHGA,CD200,TMEM30A,PRNP,SELENOK,PDCD5,NAXE,ARL6IP1,SAR1B,SLC25A5,SLC25A6,ENHO,NNAT,B3GAT3,FABP3,OAZ1,VPS28
3.AD/0.HA	GABA_neurons	Down	GO BP	GOBP_NEGATIVE_REGULATION_OF_RYANODINE_SENSITIVE_CALCIUM_RELEASE_CHANNEL_ACTIVITY	GOBP_NEGATIVE_REGULATION_OF_RYANODINE_SENSITIVE_CALCIUM_RELEASE_CHANNEL_ACTIVITY	3.36992	0.00185878	0.0557672	CALM1,CALM3,CALM2,SRI
3.AD/0.HA	GABA_neurons	Down	GO BP	GOBP_POSITIVE_REGULATION_OF_MEMBRANE_DEPOLARIZATION	GOBP_POSITIVE_REGULATION_OF_MEMBRANE_DEPOLARIZATION	3.36992	0.00185878	0.0557672	DCN,RACK1,CCK,MLLT11
3.AD/0.HA	GABA_neurons	Down	GO BP	GOBP_POSITIVE_REGULATION_OF_PROTEIN_KINASE_ACTIVITY	GOBP_POSITIVE_REGULATION_OF_PROTEIN_KINASE_ACTIVITY	0.76371	0.00186403	0.0557672	PARK7,HSP90AB1,CCN1,PRKAR1A,SOD1,UBB,TRAF7,MT3,CDK5,RPS27A,TXN,UBA52,UBC,SPRY2,RASGRP1,ERP29,CHI3L1,DVL2,GNG3,LAMTOR2,ARAF,PPIA,STRADB,PRKAA1,RPS3,PINK1,PRDX2,THBS1,UBE2V1,CALM1,PEA15,CD81,RPLP1,CDK5R1,TOM1L1,JTB,CALM3,PIH1D1,CLU,ITGB3,CALM2,PRNP,MTCP1,CAMKK1
3.AD/0.HA	GABA_neurons	Down	GO BP	GOBP_POSITIVE_REGULATION_OF_MEMBRANE_PERMEABILITY	GOBP_POSITIVE_REGULATION_OF_MEMBRANE_PERMEABILITY	1.7238	0.0019742	0.0587404	VDAC2,MT3,YWHAB,PPIF,ATP5IF1,YWHAH,CHCHD10,SLC25A5,TMEM14A,RHOT2
3.AD/0.HA	GABA_neurons	Down	GO BP	GOBP_REGULATION_OF_UBIQUITIN_DEPENDENT_PROTEIN_CATABOLIC_PROCESS	GOBP_REGULATION_OF_UBIQUITIN_DEPENDENT_PROTEIN_CATABOLIC_PROCESS	1.20898	0.00206547	0.0611222	BCAP31,PARK7,HSP90AB1,RPL5,RPL11,RPL23,SH3RF2,ARAF,RPS7,STUB1,RACK1,TAF9,CLU,DDRGK1,PDCL3,RAD23A,ELOB,CAMLG
3.AD/0.HA	GABA_neurons	Down	GO BP	GOBP_POSITIVE_REGULATION_OF_PROTEIN_DEPHOSPHORYLATION	GOBP_POSITIVE_REGULATION_OF_PROTEIN_DEPHOSPHORYLATION	1.97218	0.00215044	0.0632926	HSP90AB1,SLC39A10,PIN1,PPIA,PINK1,CALM1,CALM3,CALM2
3.AD/0.HA	GABA_neurons	Down	GO BP	GOBP_IRON_ION_TRANSPORT	GOBP_IRON_ION_TRANSPORT	1.59896	0.00221205	0.064756	ISCU,FTH1,FTL,SLC22A17,ATP6V1B2,ATP6V0C,ATP6V0B,ATP6AP1,B2M,ATP6V1F,ATP6V1G1
3.AD/0.HA	GABA_neurons	Down	GO BP	GOBP_NUCLEOBASE_CONTAINING_SMALL_MOLECULE_INTERCONVERSION	GOBP_NUCLEOBASE_CONTAINING_SMALL_MOLECULE_INTERCONVERSION	2.3721	0.00237146	0.0690513	NME1,NME2,AK1,NME3,GUK1,AK6
3.AD/0.HA	GABA_neurons	Down	GO BP	GOBP_REGULATION_OF_CHOLESTEROL_METABOLIC_PROCESS	GOBP_REGULATION_OF_CHOLESTEROL_METABOLIC_PROCESS	1.79762	0.00240467	0.0692773	HMGCS1,SOD1,PRKAA1,GNB3,PMVK,FDPS,IDI1,SC5D,TM7SF2
3.AD/0.HA	GABA_neurons	Down	GO BP	GOBP_CHEMICAL_HOMEOSTASIS	GOBP_CHEMICAL_HOMEOSTASIS	0.543887	0.00253954	0.0727778	BCAP31,PARK7,DCN,IGFBP5,SERPINF1,PRKAR1A,RBP4,RPS6,SOD1,TAC1,DYNLL1,RGN,TMEM203,NDFIP1,ISCU,FTH1,FTL,MT3,ATOX1,SLC22A17,ATP6V1B2,ATP6V0C,ATP6V0B,ATP6AP1,B2M,SLC39A10,SLC30A3,SLC39A7,ATP6V1F,ATP6V1G1,CDK5,STAT1,NR1D1,ATP6AP2,GNG3,GSTP1,LAMTOR1,CAMK2N1,PRKAA1,CX3CL1,SKP1,CALM1,STMN1,ARF1,CALM3,RACK1,PIH1D1,THY1,CCK,CALM2,INSIG1,SV2A,ATP1B1,SCN7A,SLC4A3,SRI,CALB1,FABP5,PTGER3,MPC2,PHPT1,LGALS1,NME1,…
3.AD/0.HA	GABA_neurons	Down	GO BP	GOBP_REGULATION_OF_STEROID_METABOLIC_PROCESS	GOBP_REGULATION_OF_STEROID_METABOLIC_PROCESS	1.34935	0.00260231	0.0741864	HMGCS1,SOD1,NR1D1,LAMTOR1,PRKAA1,STUB1,INSIG1,ASAH1,GNB3,PMVK,FDPS,IDI1,SC5D,TM7SF2
3.AD/0.HA	GABA_neurons	Down	GO BP	GOBP_REGULATION_OF_CELLULAR_RESPONSE_TO_HYPOXIA	GOBP_REGULATION_OF_CELLULAR_RESPONSE_TO_HYPOXIA	3.17733	0.00267291	0.0758022	ENO1,PINK1,HYOU1,CHCHD2
3.AD/0.HA	GABA_neurons	Down	GO BP	GOBP_ALCOHOL_METABOLIC_PROCESS	GOBP_ALCOHOL_METABOLIC_PROCESS	0.866005	0.0027071	0.0763738	PARK7,HMGCS1,RBP4,SOD1,MT3,PRKAA1,CALM1,EBP,INSIG1,ALDH1A2,ASAH1,ADH5,GNB3,GOT1,COQ3,TPI1,DPAGT1,PMVK,AKR1C2,NUDT10,FDPS,IDH3B,IDI1,NFE2L1,PCBD1,BCO1,NUDT11,MSMO1,SC5D,TM7SF2,DHDDS,DPM2,PIP4P1
3.AD/0.HA	GABA_neurons	Down	GO BP	GOBP_POSITIVE_REGULATION_OF_INTRINSIC_APOPTOTIC_SIGNALING_PATHWAY	GOBP_POSITIVE_REGULATION_OF_INTRINSIC_APOPTOTIC_SIGNALING_PATHWAY	1.76716	0.00272516	0.0764872	BCAP31,PARK7,SOD1,UBB,RPL11,RPL26,RPS3,RPS7,RACK1
3.AD/0.HA	GABA_neurons	Down	GO BP	GOBP_CELLULAR_RESPONSE_TO_TOXIC_SUBSTANCE	GOBP_CELLULAR_RESPONSE_TO_TOXIC_SUBSTANCE	1.33491	0.00282352	0.0788414	PARK7,GPX4,MGST1,SOD1,MT3,TXN,GSTP1,PINK1,PRDX2,PRDX5,PRDX1,ADH5,GSTK1,SELENOW
3.AD/0.HA	GABA_neurons	Down	GO BP	GOBP_MATURATION_OF_LSU_RRNA	GOBP_MATURATION_OF_LSU_RRNA	2.305	0.002886	0.0797678	RPL35,RPL10A,RPL7,RPL7A,SNU13,LAS1L
3.AD/0.HA	GABA_neurons	Down	GO BP	GOBP_TETRAPYRROLE_BIOSYNTHETIC_PROCESS	GOBP_TETRAPYRROLE_BIOSYNTHETIC_PROCESS	2.305	0.002886	0.0797678	ATP5IF1,PGRMC1,NFE2L1,UROS,COX15,UROD
3.AD/0.HA	GABA_neurons	Down	GO BP	GOBP_ORGANONITROGEN_COMPOUND_CATABOLIC_PROCESS	GOBP_ORGANONITROGEN_COMPOUND_CATABOLIC_PROCESS	0.504644	0.00295828	0.0813527	BCAP31,PARK7,DCN,DLD,HSP90AB1,PITHD1,UBB,RGN,NDFIP1,RPL5,RPL11,ANAPC15,ANAPC11,CDK5RAP3,CDO1,KAT5,CRYM,RPS27A,TDG,UBA52,UBC,RPL23,NR1D1,CHI3L1,SH3RF2,ARAF,PIN1,PSMA3,PSMA7,PSMB1,PSMB6,PSMB10,PSME1,CEACAM1,SKP1,PINK1,UCHL1,CD81,RPS7,STUB1,RNF187,RNF167,UBE2S,FBXL15,VPS35,TOM1L1,RACK1,HSPA8,GABARAPL2,ATP5IF1,TAF9,CLU,LUM,DDRGK1,GPC3,GAD2,PAH,PDXDC1,AP2M1,AP2S1,CST3,CTSL,EEF1A1,ASAH1,PDCL3,C4BPA,CTS…
3.AD/0.HA	GABA_neurons	Down	GO BP	GOBP_POSITIVE_REGULATION_OF_DEPHOSPHORYLATION	GOBP_POSITIVE_REGULATION_OF_DEPHOSPHORYLATION	1.73732	0.00307853	0.084234	HSP90AB1,RGN,SLC39A10,PIN1,PPIA,PINK1,CALM1,CALM3,CALM2
3.AD/0.HA	GABA_neurons	Down	GO BP	GOBP_CELLULAR_ION_HOMEOSTASIS	GOBP_CELLULAR_ION_HOMEOSTASIS	0.658672	0.00319455	0.086962	BCAP31,SOD1,TAC1,RGN,TMEM203,NDFIP1,ISCU,FTH1,FTL,MT3,ATOX1,SLC22A17,ATP6V1B2,ATP6V0C,ATP6V0B,ATP6AP1,SLC39A10,SLC30A3,SLC39A7,ATP6V1F,ATP6V1G1,CDK5,ATP6AP2,GNG3,CX3CL1,SKP1,CALM1,ARF1,CALM3,THY1,CALM2,SV2A,ATP1B1,SLC4A3,SRI,CALB1,PTGER3,LPAR6,STOML2,PRNP,SELENOK,GOT1,CKB,NEDD8,SLC24A5,TMCO1,TPT1,SMDT1,MTLN,GRINA,MT1X,CALB2
3.AD/0.HA	GABA_neurons	Down	GO BP	GOBP_POSITIVE_REGULATION_OF_INTRACELLULAR_PROTEIN_TRANSPORT	GOBP_POSITIVE_REGULATION_OF_INTRACELLULAR_PROTEIN_TRANSPORT	1.1331	0.00321017	0.086962	BCAP31,HSP90AB1,CDK5,PRKAA1,PINK1,YWHAB,CD81,CDK5R1,UBL5,TOMM7,YWHAH,HPCA,VAMP2,TMEM30A,PRNP,PDCD5,SAR1B,B3GAT3,OAZ1
3.AD/0.HA	GABA_neurons	Down	GO BP	GOBP_REGULATION_OF_PROTEASOMAL_PROTEIN_CATABOLIC_PROCESS	GOBP_REGULATION_OF_PROTEASOMAL_PROTEIN_CATABOLIC_PROCESS	1.12392	0.00333827	0.0888479	BCAP31,PARK7,HSP90AB1,PITHD1,UBB,RPL11,SH3RF2,ARAF,PSME1,PINK1,STUB1,RACK1,GABARAPL2,TAF9,CLU,DDRGK1,RAD23A,ELOB,CAMLG
3.AD/0.HA	GABA_neurons	Down	GO BP	GOBP_REGULATION_OF_CELLULAR_RESPONSE_TO_GROWTH_FACTOR_STIMULUS	GOBP_REGULATION_OF_CELLULAR_RESPONSE_TO_GROWTH_FACTOR_STIMULUS	0.962632	0.00336481	0.0889387	FST,DCN,HES1,HSP90AB1,CCN1,SFRP1,UBB,MT3,EID2,RPS27A,UBA52,UBC,SPRY2,BMPER,PIN1,THBS1,STUB1,FBXL15,ITGB3,CHRD,GPC3,ASPN,TGFBR3L,CD63,GOT1,PEG10
3.AD/0.HA	GABA_neurons	Down	GO BP	GOBP_CELLULAR_PROTEIN_COMPLEX_DISASSEMBLY	GOBP_CELLULAR_PROTEIN_COMPLEX_DISASSEMBLY	1.02045	0.00347432	0.0910895	TRMT112,CFL1,STMN2,SPEF1,STMN1,STMN3,AURKAIP1,HSPA8,MRPS36,CHCHD1,MRPL21,MRPL46,MRPL51,MRPL27,MRPS21,MRPL16,MRPS12,MRPL34,MRPS34,MRPL57,MRPL43,DSTN
3.AD/0.HA	GABA_neurons	Down	GO BP	GOBP_NUCLEOTIDE_EXCISION_REPAIR_PREINCISION_COMPLEX_ASSEMBLY	GOBP_NUCLEOTIDE_EXCISION_REPAIR_PREINCISION_COMPLEX_ASSEMBLY	2.24069	0.00347964	0.0910895	CETN2,UBB,RPS27A,UBA52,UBC,RPA3
3.AD/0.HA	GABA_neurons	Down	GO BP	GOBP_POSITIVE_REGULATION_OF_MITOCHONDRION_ORGANIZATION	GOBP_POSITIVE_REGULATION_OF_MITOCHONDRION_ORGANIZATION	1.49316	0.00365651	0.0951156	PARK7,DCN,PINK1,YWHAB,VPS35,PPIF,ATP5IF1,YWHAH,CHCHD10,MLLT11,PDCD5
3.AD/0.HA	GABA_neurons	Down	GO BP	GOBP_INTRACILIARY_TRANSPORT	GOBP_INTRACILIARY_TRANSPORT	1.8236	0.00373994	0.0964045	MAK,DYNLL1,DYNLL2,LCA5L,DYNC2LI1,IFT46,DYNLRB2,DYNLRB1
3.AD/0.HA	GABA_neurons	Down	GO BP	GOBP_CATION_TRANSMEMBRANE_TRANSPORT	GOBP_CATION_TRANSMEMBRANE_TRANSPORT	0.577367	0.00381568	0.097086	PARK7,RGN,ISCU,ATP6V1B2,ATP6V0C,ATP6V0B,ATP6AP1,SLC39A10,SLC30A3,SLC39A7,ATP6V1F,ATP6V1G1,CDK5,NEFL,CX3CL1,PINK1,CALM1,ARF1,CALM3,PPIF,THY1,YWHAH,CALM2,HPCA,VAMP2,ATP1B1,SCN7A,SRI,STOML2,PRNP,CAPN1,CD63,COX7A1,COX7A2,SLC6A7,SLC22A4,PM20D1,ATP5PD,COX4I1,COX6A1,COX6B1,COX6C,COX7B,COX7C,COX8A,COX15,NDUFS7,NDUFA4,ATP5F1D,ATP5F1E,ATP5MC1,ATP5MC2,ATP5MC3,ATP5ME,ATP5PF,ATP5PO,SLC25A14,COX5A,ATP5MF,TSPAN…
3.AD/0.HA	GABA_neurons	Down	GO BP	GOBP_POSITIVE_REGULATION_OF_PHOSPHOPROTEIN_PHOSPHATASE_ACTIVITY	GOBP_POSITIVE_REGULATION_OF_PHOSPHOPROTEIN_PHOSPHATASE_ACTIVITY	2.50024	0.0039899	0.100579	HSP90AB1,SLC39A10,CALM1,CALM3,CALM2
3.AD/0.HA	GABA_neurons	Down	GO BP	GOBP_ERROR_PRONE_TRANSLESION_SYNTHESIS	GOBP_ERROR_PRONE_TRANSLESION_SYNTHESIS	2.50024	0.0039899	0.100579	UBB,RPS27A,UBA52,UBC,RPA3
3.AD/0.HA	GABA_neurons	Down	GO BP	GOBP_REGULATION_OF_PROTEIN_MODIFICATION_BY_SMALL_PROTEIN_CONJUGATION_OR_REMOVAL	GOBP_REGULATION_OF_PROTEIN_MODIFICATION_BY_SMALL_PROTEIN_CONJUGATION_OR_REMOVAL	1.00726	0.00417362	0.104725	PARK7,HSP90AB1,UBB,NDFIP1,RPL5,RPL11,CDK5RAP3,CDK5,RPL23,SPRY2,SH3RF2,PIN1,PPIA,RPS3,SKP1,PINK1,RPS2,RPS7,STUB1,UBE2S,OTUB1,VPS28,CAMLG
3.AD/0.HA	GABA_neurons	Down	GO BP	GOBP_NAD_METABOLIC_PROCESS	GOBP_NAD_METABOLIC_PROCESS	1.78875	0.00425167	0.106124	ENO1,GAPDH,PGM2L1,ALDOC,PGAM1,ENO2,PFKM,TPI1
3.AD/0.HA	GABA_neurons	Down	GO BP	GOBP_MONOSACCHARIDE_CATABOLIC_PROCESS	GOBP_MONOSACCHARIDE_CATABOLIC_PROCESS	1.65133	0.00435885	0.107882	ENO1,GAPDH,PGM2L1,ALDOC,PGAM1,ENO2,GALT,PFKM,TPI1
3.AD/0.HA	GABA_neurons	Down	GO BP	GOBP_PROTEIN_LOCALIZATION_TO_MITOCHONDRION	GOBP_PROTEIN_LOCALIZATION_TO_MITOCHONDRION	1.17537	0.00438392	0.108011	BCAP31,DNAJC19,PRKAA1,PINK1,YWHAB,CALM1,CALM3,UBL5,TOMM7,ATP5IF1,YWHAH,TOMM20,PDCD5,SLC25A6,NDUFA13,TOMM5
3.AD/0.HA	GABA_neurons	Down	GO BP	GOBP_VIRION_ASSEMBLY	GOBP_VIRION_ASSEMBLY	1.943	0.00441075	0.108183	UBB,RPS27A,UBA52,UBC,PPIA,SPCS1,VPS28
3.AD/0.HA	GABA_neurons	Down	GO BP	GOBP_MYELOID_LEUKOCYTE_MEDIATED_IMMUNITY	GOBP_MYELOID_LEUKOCYTE_MEDIATED_IMMUNITY	0.690603	0.00447243	0.109204	HSP90AB1,MGST1,PSAP,RAB3A,DYNLL1,FTH1,FTL,ATP6V0C,B2M,ATP6AP2,CHI3L1,LAMTOR2,GSTP1,PPIA,LAMTOR1,PSMB1,CEACAM1,TUBB4B,HSPA8,VAMP2,FABP5,PTGES2,NME2,PGRMC1,CHGA,CST3,CSTB,EEF1A1,ALDOC,COMMD3,COMMD9,HLA-C,ASAH1,NDUFC2,PGAM1,TMEM30A,TRAPPC1,SRP14,CAPN1,CYSTM1,DEGS1,GGH,NAPRT,CD63
3.AD/0.HA	GABA_neurons	Down	GO BP	GOBP_TRANSCRIPTION_COUPLED_NUCLEOTIDE_EXCISION_REPAIR	GOBP_TRANSCRIPTION_COUPLED_NUCLEOTIDE_EXCISION_REPAIR	1.52718	0.0047012	0.113769	UBB,RPS27A,UBA52,UBC,RPA3,COPS6,POLR2I,POLR2K,POLR2L,HMGN1
3.AD/0.HA	GABA_neurons	Down	GO BP	GOBP_APOPTOTIC_PROCESS	GOBP_APOPTOTIC_PROCESS	0.420898	0.00479332	0.114927	SLC25A4,BCAP31,PARK7,HSP90AB1,CCN1,NBN,RPS6,SFRP1,SOD1,UBB,VDAC2,DYNLL1,RGN,RPL10,RPL11,TRAF7,MT3,SLC39A10,RPL26,CDK5RAP3,CDK5,ENO1,PPID,RPS27A,STAT1,UBA52,UBC,SPRY2,ARL6IP5,ERP29,CHI3L1,SH3RF2,GSTP1,ARAF,NEFL,PIN1,PPIA,STRADB,PRKAA1,RPS3,CX3CL1,PINK1,PRDX2,THBS1,YWHAB,PEA15,RPS3A,RPS7,CFL1,GABARAP,GAPDH,CDK5R1,VPS35,PPP1CA,CDKN2D,JTB,APEX1,TAF10,BTG1,PPIF,RACK1,PRDX5,SAP18,ATP5IF1,PIH1D1,TAF9,OL…
3.AD/0.HA	GABA_neurons	Down	GO BP	GOBP_CELLULAR_OXIDANT_DETOXIFICATION	GOBP_CELLULAR_OXIDANT_DETOXIFICATION	1.35942	0.00481444	0.114927	PARK7,GPX4,MGST1,SOD1,MT3,TXN,GSTP1,PRDX2,PRDX5,PRDX1,GSTK1,SELENOW
3.AD/0.HA	GABA_neurons	Down	GO BP	GOBP_REGULATION_OF_STEROID_BIOSYNTHETIC_PROCESS	GOBP_REGULATION_OF_STEROID_BIOSYNTHETIC_PROCESS	1.43324	0.00483347	0.114927	HMGCS1,SOD1,NR1D1,PRKAA1,INSIG1,ASAH1,PMVK,FDPS,IDI1,SC5D,TM7SF2
3.AD/0.HA	GABA_neurons	Down	GO BP	GOBP_ION_HOMEOSTASIS	GOBP_ION_HOMEOSTASIS	0.602439	0.00488316	0.115129	BCAP31,DCN,SOD1,TAC1,RGN,TMEM203,NDFIP1,ISCU,FTH1,FTL,MT3,ATOX1,SLC22A17,ATP6V1B2,ATP6V0C,ATP6V0B,ATP6AP1,B2M,SLC39A10,SLC30A3,SLC39A7,ATP6V1F,ATP6V1G1,CDK5,ATP6AP2,GNG3,CAMK2N1,CX3CL1,SKP1,CALM1,ARF1,CALM3,RACK1,THY1,CCK,CALM2,SV2A,ATP1B1,SCN7A,SLC4A3,SRI,CALB1,PTGER3,LPAR6,STOML2,PRNP,SELENOK,MLLT11,GOT1,CKB,NEDD8,SLC24A5,TMCO1,TPT1,SMDT1,MTLN,GRINA,MT1X,CALB2
3.AD/0.HA	GABA_neurons	Down	GO BP	GOBP_NUCLEOTIDE_EXCISION_REPAIR_DNA_DUPLEX_UNWINDING	GOBP_NUCLEOTIDE_EXCISION_REPAIR_DNA_DUPLEX_UNWINDING	2.41291	0.00494328	0.115129	CETN2,UBB,RPS27A,UBA52,UBC
3.AD/0.HA	GABA_neurons	Down	GO BP	GOBP_CHAPERONE_MEDIATED_PROTEIN_COMPLEX_ASSEMBLY	GOBP_CHAPERONE_MEDIATED_PROTEIN_COMPLEX_ASSEMBLY	2.41291	0.00494328	0.115129	HSP90AB1,STUB1,CLU,HOPX,PFDN6
3.AD/0.HA	GABA_neurons	Down	GO BP	GOBP_REGULATION_OF_CELL_COMMUNICATION_BY_ELECTRICAL_COUPLING	GOBP_REGULATION_OF_CELL_COMMUNICATION_BY_ELECTRICAL_COUPLING	2.85541	0.00496884	0.115129	CALM1,CALM3,CALM2,SRI
3.AD/0.HA	GABA_neurons	Down	GO BP	GOBP_POSITIVE_REGULATION_OF_PROTEIN_EXIT_FROM_ENDOPLASMIC_RETICULUM	GOBP_POSITIVE_REGULATION_OF_PROTEIN_EXIT_FROM_ENDOPLASMIC_RETICULUM	2.85541	0.00496884	0.115129	BCAP31,CD81,TMEM30A,SAR1B
3.AD/0.HA	GABA_neurons	Down	GO BP	GOBP_REGULATION_OF_AUTOPHAGY_OF_MITOCHONDRION_IN_RESPONSE_TO_MITOCHONDRIAL_DEPOLARIZATION	GOBP_REGULATION_OF_AUTOPHAGY_OF_MITOCHONDRION_IN_RESPONSE_TO_MITOCHONDRIAL_DEPOLARIZATION	2.85541	0.00496884	0.115129	PINK1,CDC37,TOMM7,ATP5IF1
3.AD/0.HA	GABA_neurons	Down	GO BP	GOBP_RESPONSE_TO_COPPER_ION	GOBP_RESPONSE_TO_COPPER_ION	1.89993	0.00508261	0.117266	PARK7,SOD1,MT3,MAP1LC3A,PRNP,ATP5F1D,MT1X
3.AD/0.HA	GABA_neurons	Down	GO BP	GOBP_NEGATIVE_REGULATION_OF_PROTEIN_CATABOLIC_PROCESS	GOBP_NEGATIVE_REGULATION_OF_PROTEIN_CATABOLIC_PROCESS	1.29242	0.00525081	0.120585	PARK7,HSP90AB1,RPL5,RPL11,CDK5RAP3,RPL23,PIN1,RPS7,GABARAPL2,TAF9,DDRGK1,CST3,PDCL3,CAMLG
3.AD/0.HA	GABA_neurons	Down	GO BP	GOBP_CELLULAR_RESPONSE_TO_CARBOHYDRATE_STIMULUS	GOBP_CELLULAR_RESPONSE_TO_CARBOHYDRATE_STIMULUS	1.19791	0.00527076	0.120585	SERPINF1,DYNLL1,NR1D1,CAMK2N1,PRKAA1,MAPK13,RACK1,PIH1D1,SRI,MPC2,PHPT1,LGALS1,NME1,NME2,VSNL1
3.AD/0.HA	GABA_neurons	Down	GO BP	GOBP_SECRETION	GOBP_SECRETION	0.452778	0.0054483	0.12364	SLC25A4,MAGED2,PARK7,HSP90AB1,MGST1,PSAP,RAB3A,RBP4,SFRP1,SOD1,TAC1,DYNLL1,FTH1,FTL,ATP6V0C,ATP6AP1,B2M,CDK5,CDO1,PPID,NR1D1,ATP6AP2,ERP29,CHI3L1,FN1,LAMTOR2,GSTP1,PPIA,LAMTOR1,CAMK2N1,PRKAA1,PSMB1,CEACAM1,PINK1,THBS1,CALM1,TUBB4B,TUBA4A,ARF1,CALM3,HSPA8,CLU,ITGB3,SPARC,SYT4,CCK,ECM1,SLC32A1,GAD2,STX19,PDZD11,SNCG,VAMP2,SV2A,SRI,FABP5,PTGER3,PTGES2,MPC2,PHPT1,NME1,NME2,VSNL1,PGRMC1,CHGA,CST3,CSTB…
3.AD/0.HA	GABA_neurons	Down	GO BP	GOBP_CARBOHYDRATE_DERIVATIVE_BIOSYNTHETIC_PROCESS	GOBP_CARBOHYDRATE_DERIVATIVE_BIOSYNTHETIC_PROCESS	0.631363	0.00544968	0.12364	DCN,DLD,NPPC,TECR,MT3,ATP6V0C,ENO1,PRKAA1,PINK1,B3GALNT1,B3GALT2,LUM,GPC3,GCNT1,MPC2,NME1,NME2,STOML2,VEGFB,NAGPA,B3GAT3,TPI1,B4GALT4,B4GAT1,OGA,DPAGT1,DHDDS,DPM2,ATP5PD,ATP5F1D,ATP5F1E,ATP5MC1,ATP5MC2,ATP5MC3,ATP5ME,ATP5PF,ATP5PO,UQCC3,ATP5MF,AK1,NME3,TK2,UPP1,ASGR1,B3GNT5,PYURF,PIGG,RFK,ITM2C,ITM2B,GUK1
3.AD/0.HA	GABA_neurons	Down	GO BP	GOBP_REGULATION_OF_PEPTIDASE_ACTIVITY	GOBP_REGULATION_OF_PEPTIDASE_ACTIVITY	0.740172	0.00594446	0.1332	BCAP31,SPINT2,PARK7,CCN1,SERPINF1,PZP,MT3,ARL6IP5,FN1,PEBP1,PSMA3,PSME1,RPS3,PINK1,THBS1,GAPDH,CDKN2D,RACK1,PRDX5,PIH1D1,EFNA3,CCK,LAMTOR5,ECM1,DDRGK1,GPC3,CST3,CSTB,PRNP,F3,PDCD5,PCSK1N,ARL6IP1,NDUFA13,MTCH1,BEX3
3.AD/0.HA	GABA_neurons	Down	GO BP	GOBP_MAINTENANCE_OF_PROTEIN_LOCATION_IN_CELL	GOBP_MAINTENANCE_OF_PROTEIN_LOCATION_IN_CELL	1.57014	0.00602035	0.133857	PARK7,CDK5,TXN,SKP1,PINK1,CHCHD10,INSIG1,KDELR3,TMSB10
3.AD/0.HA	GABA_neurons	Down	GO BP	GOBP_NUCLEOTIDE_EXCISION_REPAIR_DNA_GAP_FILLING	GOBP_NUCLEOTIDE_EXCISION_REPAIR_DNA_GAP_FILLING	2.33015	0.00604754	0.133857	UBB,RPS27A,UBA52,UBC,RPA3
3.AD/0.HA	GABA_neurons	Down	GO BP	GOBP_MAINTENANCE_OF_PROTEIN_LOCATION_IN_NUCLEUS	GOBP_MAINTENANCE_OF_PROTEIN_LOCATION_IN_NUCLEUS	2.33015	0.00604754	0.133857	PARK7,CDK5,TXN,SKP1,CHCHD10
3.AD/0.HA	GABA_neurons	Down	GO BP	GOBP_PROTEIN_TARGETING_TO_MITOCHONDRION	GOBP_PROTEIN_TARGETING_TO_MITOCHONDRION	1.30914	0.00615066	0.135042	BCAP31,DNAJC19,PRKAA1,PINK1,UBL5,TOMM7,ATP5IF1,TOMM20,PDCD5,SLC25A6,NDUFA13,TOMM5
3.AD/0.HA	GABA_neurons	Down	GO BP	GOBP_INTERLEUKIN_1_MEDIATED_SIGNALING_PATHWAY	GOBP_INTERLEUKIN_1_MEDIATED_SIGNALING_PATHWAY	1.30914	0.00615066	0.135042	UBB,RPS27A,UBA52,UBC,PSMA3,PSMA7,PSMB1,PSMB6,PSMB10,PSME1,SKP1,UBE2V1
3.AD/0.HA	GABA_neurons	Down	GO BP	GOBP_MEMBRANE_ORGANIZATION	GOBP_MEMBRANE_ORGANIZATION	0.534783	0.00644364	0.139832	RAB3A,SOD1,UBB,VDAC2,MT3,RPS27A,UBA52,UBC,DCTN1,DVL2,EMC10,PPIA,PINK1,THBS1,YWHAB,CALM1,ARF1,CALM3,BANF1,PPIF,HSPA8,ATP5IF1,CLU,SYT4,YWHAH,MYADM,CHCHD10,INSIG1,TRAPPC2,STX19,VAMP2,ATP1B1,AP2M1,AP2S1,ACTG1,CTSL,TMEM30A,TRAPPC1,DEGS1,PDCD5,NAXE,ARL6IP1,SAR1B,SLC25A5,ATP5PD,NDUFA13,ATP5F1D,ATP5F1E,ATP5MC1,ATP5MC2,ATP5MC3,ATP5ME,ATP5PF,ATP5PO,UQCC3,ATP5MF,MTCH1,TMEM14A,RHOT2,TRAPPC5,XKR9,SUN3,MICOS13…
3.AD/0.HA	GABA_neurons	Down	GO BP	GOBP_ESTABLISHMENT_OF_TISSUE_POLARITY	GOBP_ESTABLISHMENT_OF_TISSUE_POLARITY	1.22428	0.00647927	0.139832	SFRP1,DVL2,PSMA3,PSMA7,PSMB1,PSMB6,PSMB10,PSME1,SPEF1,GPC3,PFN1,AP2M1,AP2S1,FZD6
3.AD/0.HA	GABA_neurons	Down	GO BP	GOBP_REGULATION_OF_CELLULAR_RESPONSE_TO_TRANSFORMING_GROWTH_FACTOR_BETA_STIMULUS	GOBP_REGULATION_OF_CELLULAR_RESPONSE_TO_TRANSFORMING_GROWTH_FACTOR_BETA_STIMULUS	1.22428	0.00647927	0.139832	HSP90AB1,UBB,EID2,RPS27A,UBA52,UBC,SPRY2,PIN1,THBS1,STUB1,ASPN,TGFBR3L,GOT1,PEG10
3.AD/0.HA	GABA_neurons	Down	GO BP	GOBP_TERPENOID_BIOSYNTHETIC_PROCESS	GOBP_TERPENOID_BIOSYNTHETIC_PROCESS	2.71755	0.00649723	0.139832	HMGCS1,ALDH1A2,FDPS,BCO1
3.AD/0.HA	GABA_neurons	Down	GO BP	GOBP_SEQUESTERING_OF_METAL_ION	GOBP_SEQUESTERING_OF_METAL_ION	2.71755	0.00649723	0.139832	FTH1,FTL,SLC30A3,SRI
3.AD/0.HA	GABA_neurons	Down	GO BP	GOBP_NEGATIVE_REGULATION_OF_PROTEIN_METABOLIC_PROCESS	GOBP_NEGATIVE_REGULATION_OF_PROTEIN_METABOLIC_PROCESS	0.517118	0.00673154	0.143658	SPINT2,PARK7,HSP90AB1,IGFBP5,DND1,SERPINF1,PRKAR1A,PZP,SFRP1,PPP1R1B,RGN,TERF2IP,RPL5,RPL11,MT3,CDK5RAP3,CDK5,RPL23,SPRY2,SH3RF2,GSTP1,PEBP1,PIN1,PPIA,CAMK2N1,PRKAA1,RPS3,CEACAM1,THBS1,UCHL1,YWHAB,CALM1,RPL13A,RPS7,OTUB1,GAPDH,CDKN2D,CALM3,RACK1,PRDX5,CIRBP,GABARAPL2,PIH1D1,TAF9,CLU,ITGB3,THY1,MYADM,CALM2,LAMTOR5,ECM1,DDRGK1,GPC3,CST3,CSTB,PRNP,PDCL3,PCSK1N,ARL6IP1,SRP9,PFDN6,PFDN4,PFDN5,VBP1,HIN…
3.AD/0.HA	GABA_neurons	Down	GO BP	GOBP_POSITIVE_REGULATION_OF_PHOSPHATASE_ACTIVITY	GOBP_POSITIVE_REGULATION_OF_PHOSPHATASE_ACTIVITY	2.00923	0.00678727	0.143658	HSP90AB1,RGN,SLC39A10,CALM1,CALM3,CALM2
3.AD/0.HA	GABA_neurons	Down	GO BP	GOBP_HEME_METABOLIC_PROCESS	GOBP_HEME_METABOLIC_PROCESS	2.00923	0.00678727	0.143658	ATP5IF1,PGRMC1,NFE2L1,UROS,COX15,UROD
3.AD/0.HA	GABA_neurons	Down	GO BP	GOBP_NEURON_CELLULAR_HOMEOSTASIS	GOBP_NEURON_CELLULAR_HOMEOSTASIS	2.00923	0.00678727	0.143658	CDK5,DCTN1,PRKAA1,CX3CL1,CALB1,CALB2
3.AD/0.HA	GABA_neurons	Down	GO BP	GOBP_HOMEOSTATIC_PROCESS	GOBP_HOMEOSTATIC_PROCESS	0.4026	0.00680691	0.143658	PIF1,BCAP31,PARK7,DCN,DLD,HSP90AB1,IGFBP5,MAK,NBN,SERPINF1,PRKAR1A,RBP4,RPS6,SOD1,TAC1,UBB,DYNLL1,RGN,TMEM203,TERF2IP,NDFIP1,RPS14,ISCU,FTH1,FTL,MT3,ATOX1,SLC22A17,ATP6V1B2,ATP6V0C,ATP6V0B,ATP6AP1,B2M,SLC39A10,SLC30A3,SLC39A7,ATP6V1F,ATP6V1G1,CDK5RAP3,CDK5,NDN,STAT1,TXN,NR1D1,DCTN1,NOP10,ATP6AP2,GNG3,GSTP1,LAMTOR1,CAMK2N1,PRKAA1,CX3CL1,SKP1,PINK1,PRDX2,CALM1,RPS17,RPS24,UBE2S,STMN1,SPATA7,APEX1,A…
3.AD/0.HA	GABA_neurons	Down	GO BP	GOBP_ORGANOPHOSPHATE_METABOLIC_PROCESS	GOBP_ORGANOPHOSPHATE_METABOLIC_PROCESS	0.510534	0.00692179	0.145518	PARK7,DNAJC19,DLD,GPX4,HMGCS1,NPPC,AAAS,ACOT4,TECR,ATP6V0C,ENO1,TDG,PRKAA1,PINK1,CALM1,GAPDH,PGM2L1,ARF1,CPNE6,HPCA,FABP5,MPC2,NME1,NME2,ALDOC,STOML2,PGAM1,NAPRT,NAXE,GNB3,ENO2,PFKM,TPI1,DPAGT1,PMVK,NUDT10,FDPS,IDI1,NUDT11,DHDDS,DPM2,PIP4P1,CKB,LIPI,FABP3,CKMT1A,MCCC2,ATP5PD,ATP5F1D,ATP5F1E,ATP5MC1,ATP5MC2,ATP5MC3,ATP5ME,ATP5PF,ATP5PO,UQCC3,ATP5MF,GDA,AK1,NME3,TK2,UPP1,PYURF,PIGG,SERINC1,ARF3,RFK…
3.AD/0.HA	GABA_neurons	Down	GO BP	GOBP_INORGANIC_ION_TRANSMEMBRANE_TRANSPORT	GOBP_INORGANIC_ION_TRANSMEMBRANE_TRANSPORT	0.547869	0.00701342	0.146877	PARK7,RGN,ISCU,ATP6V1B2,ATP6V0C,ATP6V0B,ATP6AP1,SLC39A10,SLC30A3,SLC39A7,ATP6V1F,ATP6V1G1,CDK5,CX3CL1,CALM1,ARF1,CALM3,PPIF,THY1,YWHAH,CALM2,HPCA,GLRA3,VAMP2,ATP1B1,SCN7A,SRI,STOML2,PRNP,CD63,COX7A1,COX7A2,SLC6A7,PM20D1,ATP5PD,COX4I1,COX6A1,COX6B1,COX6C,COX7B,COX7C,COX8A,COX15,NDUFS7,NDUFA4,ATP5F1D,ATP5F1E,ATP5MC1,ATP5MC2,ATP5MC3,ATP5ME,ATP5PF,ATP5PO,SLC25A14,COX5A,ATP5MF,TSPAN13,SLC24A5,KCNF1,TM…
3.AD/0.HA	GABA_neurons	Down	GO BP	GOBP_CELL_COMMUNICATION_BY_ELECTRICAL_COUPLING_INVOLVED_IN_CARDIAC_CONDUCTION	GOBP_CELL_COMMUNICATION_BY_ELECTRICAL_COUPLING_INVOLVED_IN_CARDIAC_CONDUCTION	2.25207	0.00731431	0.152009	CALM1,CALM3,CALM2,ATP1B1,SRI
3.AD/0.HA	GABA_neurons	Down	GO BP	GOBP_ANTIGEN_PROCESSING_AND_PRESENTATION_OF_PEPTIDE_ANTIGEN	GOBP_ANTIGEN_PROCESSING_AND_PRESENTATION_OF_PEPTIDE_ANTIGEN	1.02641	0.00746635	0.154579	BCAP31,DYNLL1,B2M,DCTN1,PSMA3,PSMA7,PSMB1,PSMB6,PSMB10,PSME1,ARF1,AP2M1,AP2S1,CTSL,HLA-A,HLA-C,SAR1B,DYNLL2,CTSF
3.AD/0.HA	GABA_neurons	Down	GO BP	GOBP_POSITIVE_REGULATION_OF_DNA_BINDING	GOBP_POSITIVE_REGULATION_OF_DNA_BINDING	1.62604	0.0076613	0.156316	PARK7,HES1,TXN,CALM1,CALM3,LAMTOR5,DDRGK1,NME1
3.AD/0.HA	GABA_neurons	Down	GO BP	GOBP_MITOCHONDRIAL_OUTER_MEMBRANE_PERMEABILIZATION	GOBP_MITOCHONDRIAL_OUTER_MEMBRANE_PERMEABILIZATION	1.62604	0.0076613	0.156316	VDAC2,YWHAB,ATP5IF1,YWHAH,CHCHD10,SLC25A5,TMEM14A,RHOT2
3.AD/0.HA	GABA_neurons	Down	GO BP	GOBP_RESPONSE_TO_MONOSACCHARIDE	GOBP_RESPONSE_TO_MONOSACCHARIDE	1.00935	0.00787299	0.158977	ANGPT2,SERPINF1,DYNLL1,NR1D1,GSTP1,CAMK2N1,PRKAA1,THBS1,RACK1,PIH1D1,SPARC,VAMP2,SRI,MPC2,PHPT1,LGALS1,NME1,NME2,VSNL1
3.AD/0.HA	GABA_neurons	Down	GO BP	GOBP_REGULATION_OF_LIPID_BIOSYNTHETIC_PROCESS	GOBP_REGULATION_OF_LIPID_BIOSYNTHETIC_PROCESS	1.00935	0.00787299	0.158977	HMGCS1,CCN1,SOD1,RGN,NR1D1,PRKAA1,CEACAM1,RACK1,INSIG1,FABP5,ASAH1,ENHO,PMVK,FDPS,IDI1,SC5D,TM7SF2,FABP3,ORMDL1
3.AD/0.HA	GABA_neurons	Down	GO BP	GOBP_POSITIVE_REGULATION_OF_UBIQUITIN_PROTEIN_TRANSFERASE_ACTIVITY	GOBP_POSITIVE_REGULATION_OF_UBIQUITIN_PROTEIN_TRANSFERASE_ACTIVITY	1.95674	0.00788316	0.158977	PIN1,SKP1,PINK1,RPS2,STUB1,UBE2S
3.AD/0.HA	GABA_neurons	Down	GO BP	GOBP_NEGATIVE_REGULATION_OF_TRANSMEMBRANE_RECEPTOR_PROTEIN_SERINE_THREONINE_KINASE_SIGNALING_PATHWAY	GOBP_NEGATIVE_REGULATION_OF_TRANSMEMBRANE_RECEPTOR_PROTEIN_SERINE_THREONINE_KINASE_SIGNALING_PATHWAY	1.1719	0.00792051	0.159141	FST,SFRP1,UBB,EID2,RPS27A,UBA52,UBC,SPRY2,BMPER,PIN1,STUB1,CHRD,ASPN,PEG10
3.AD/0.HA	GABA_neurons	Down	GO BP	GOBP_RESPONSE_TO_CARBOHYDRATE	GOBP_RESPONSE_TO_CARBOHYDRATE	0.973948	0.00797222	0.159487	ANGPT2,SERPINF1,DYNLL1,NR1D1,GSTP1,CAMK2N1,PRKAA1,MAPK13,THBS1,RACK1,PIH1D1,SPARC,VAMP2,SRI,MPC2,PHPT1,LGALS1,NME1,NME2,VSNL1,GOT1
3.AD/0.HA	GABA_neurons	Down	GO BP	GOBP_ALCOHOL_BIOSYNTHETIC_PROCESS	GOBP_ALCOHOL_BIOSYNTHETIC_PROCESS	1.13091	0.00810088	0.159487	PARK7,HMGCS1,SOD1,PRKAA1,EBP,INSIG1,ASAH1,GOT1,PMVK,FDPS,IDI1,PCBD1,MSMO1,SC5D,TM7SF2,DHDDS
3.AD/0.HA	GABA_neurons	Down	GO BP	GOBP_POSITIVE_REGULATION_OF_INTRACELLULAR_TRANSPORT	GOBP_POSITIVE_REGULATION_OF_INTRACELLULAR_TRANSPORT	0.966478	0.00811611	0.159487	BCAP31,HSP90AB1,CDK5,PRKAA1,PINK1,YWHAB,CD81,CDK5R1,ARF1,UBL5,TOMM7,YWHAH,HPCA,VAMP2,TMEM30A,PRNP,PDCD5,SAR1B,B3GAT3,OAZ1,CALY
3.AD/0.HA	GABA_neurons	Down	GO BP	GOBP_NEGATIVE_REGULATION_OF_CALCIUM_ION_TRANSPORT_INTO_CYTOSOL	GOBP_NEGATIVE_REGULATION_OF_CALCIUM_ION_TRANSPORT_INTO_CYTOSOL	2.592	0.00830767	0.159487	CALM1,CALM3,CALM2,SRI
3.AD/0.HA	GABA_neurons	Down	GO BP	GOBP_CHAPERONE_MEDIATED_AUTOPHAGY	GOBP_CHAPERONE_MEDIATED_AUTOPHAGY	2.592	0.00830767	0.159487	STUB1,HSPA8,CLU,EEF1A1
3.AD/0.HA	GABA_neurons	Down	GO BP	GOBP_TAIL_ANCHORED_MEMBRANE_PROTEIN_INSERTION_INTO_ER_MEMBRANE	GOBP_TAIL_ANCHORED_MEMBRANE_PROTEIN_INSERTION_INTO_ER_MEMBRANE	2.592	0.00830767	0.159487	EMC10,EMC7,GET1,EMC6
3.AD/0.HA	GABA_neurons	Down	GO BP	GOBP_NEGATIVE_REGULATION_OF_RESPONSE_TO_REACTIVE_OXYGEN_SPECIES	GOBP_NEGATIVE_REGULATION_OF_RESPONSE_TO_REACTIVE_OXYGEN_SPECIES	2.592	0.00830767	0.159487	PARK7,TXN,PINK1,RACK1
3.AD/0.HA	GABA_neurons	Down	GO BP	GOBP_NUCLEOTIDE_TRANSMEMBRANE_TRANSPORT	GOBP_NUCLEOTIDE_TRANSMEMBRANE_TRANSPORT	2.592	0.00830767	0.159487	SLC25A4,SLC25A36,SLC25A5,SLC25A6
3.AD/0.HA	GABA_neurons	Down	GO BP	GOBP_RESPONSE_TO_SALT	GOBP_RESPONSE_TO_SALT	2.592	0.00830767	0.159487	NEFL,MAPK13,HNRNPA1,HPCA
3.AD/0.HA	GABA_neurons	Down	GO BP	GOBP_POSITIVE_REGULATION_OF_TORC1_SIGNALING	GOBP_POSITIVE_REGULATION_OF_TORC1_SIGNALING	2.592	0.00830767	0.159487	PIH1D1,LAMTOR5,RRAGA,PIP4P1
3.AD/0.HA	GABA_neurons	Down	GO BP	GOBP_REGULATION_OF_INTRACELLULAR_PROTEIN_TRANSPORT	GOBP_REGULATION_OF_INTRACELLULAR_PROTEIN_TRANSPORT	0.925634	0.0083185	0.159487	BCAP31,PARK7,HSP90AB1,CDK5,TXN,PRKAA1,PINK1,YWHAB,CD81,CDK5R1,UBL5,TOMM7,ATP5IF1,YWHAH,HPCA,INSIG1,VAMP2,TMEM30A,PRNP,PDCD5,SAR1B,B3GAT3,OAZ1
3.AD/0.HA	GABA_neurons	Down	GO BP	GOBP_NEGATIVE_REGULATION_OF_CELLULAR_COMPONENT_ORGANIZATION	GOBP_NEGATIVE_REGULATION_OF_CELLULAR_COMPONENT_ORGANIZATION	0.586196	0.00863774	0.165026	PIF1,PARK7,MAK,NBN,PRKAR1A,RAD1,VDAC2,TERF2IP,MT3,B2M,ANAPC15,NAA10,CDK5,SPRY2,PINK1,THBS1,WDR54,RPL13A,OTUB1,STMN2,SPEF1,STMN1,CDK5R1,TOM1L1,AURKAIP1,PPIF,HNRNPA1,HSPA8,PIH1D1,CLU,ITGB3,SYT4,THY1,YWHAH,MYADM,PFN1,PFN2,LGALS1,LMO4,CST3,PRNP,SLC25A5,HMGA1,PFDN6,PFDN4,PFDN5,VBP1,TMEM14A,ITM2C,TCHP,TMSB10,RTN4RL2
3.AD/0.HA	GABA_neurons	Down	GO BP	GOBP_MAINTENANCE_OF_PROTEIN_LOCATION	GOBP_MAINTENANCE_OF_PROTEIN_LOCATION	1.30215	0.00874992	0.166585	PARK7,CDK5,TXN,SKP1,PINK1,YWHAB,CHCHD10,INSIG1,SRI,KDELR3,TMSB10
3.AD/0.HA	GABA_neurons	Down	GO BP	GOBP_PROTEIN_FOLDING	GOBP_PROTEIN_FOLDING	0.936977	0.00886161	0.168124	DNAJC19,HSP90AB1,NPPC,B2M,PPID,ERP29,PPIA,PPIF,HSPA8,PPIB,CDC37,CLU,PDCD5,PDCL3,GNB3,DNAJA2,PFDN6,NUDCD2,PFDN4,PFDN5,VBP1
3.AD/0.HA	GABA_neurons	Down	GO BP	GOBP_NEGATIVE_REGULATION_OF_PROTEASOMAL_UBIQUITIN_DEPENDENT_PROTEIN_CATABOLIC_PROCESS	GOBP_NEGATIVE_REGULATION_OF_PROTEASOMAL_UBIQUITIN_DEPENDENT_PROTEIN_CATABOLIC_PROCESS	1.90579	0.00910079	0.171467	PARK7,HSP90AB1,RPL11,TAF9,DDRGK1,CAMLG
3.AD/0.HA	GABA_neurons	Down	GO BP	GOBP_POSITIVE_REGULATION_OF_INSULIN_SECRETION_INVOLVED_IN_CELLULAR_RESPONSE_TO_GLUCOSE_STIMULUS	GOBP_POSITIVE_REGULATION_OF_INSULIN_SECRETION_INVOLVED_IN_CELLULAR_RESPONSE_TO_GLUCOSE_STIMULUS	1.90579	0.00910079	0.171467	DYNLL1,CAMK2N1,SRI,MPC2,PHPT1,VSNL1
3.AD/0.HA	GABA_neurons	Down	GO BP	GOBP_DETOXIFICATION	GOBP_DETOXIFICATION	1.13376	0.00930017	0.174619	PARK7,GPX4,MGST1,SOD1,MT3,TXN,GSTP1,PRDX2,PRDX5,PRDX1,ADH5,GSTK1,MT1X,SELENOW
3.AD/0.HA	GABA_neurons	Down	GO BP	GOBP_PIGMENT_BIOSYNTHETIC_PROCESS	GOBP_PIGMENT_BIOSYNTHETIC_PROCESS	1.56574	0.00948635	0.177502	DDT,ATP5IF1,PGRMC1,NFE2L1,UROS,COX15,UROD,SLC24A5
3.AD/0.HA	GABA_neurons	Down	GO BP	GOBP_UTP_BIOSYNTHETIC_PROCESS	GOBP_UTP_BIOSYNTHETIC_PROCESS	3.17584	0.00957792	0.178602	NME1,NME2,NME3
3.AD/0.HA	GABA_neurons	Down	GO BP	GOBP_POSITIVE_REGULATION_OF_CATALYTIC_ACTIVITY	GOBP_POSITIVE_REGULATION_OF_CATALYTIC_ACTIVITY	0.438091	0.00964537	0.178692	BCAP31,PARK7,DNAJC19,HSP90AB1,CCN1,NBN,PRKAR1A,RAB3A,SFRP1,SOD1,UBB,DYNLL1,RGN,TRAF7,ISCU,MT3,SLC39A10,CDK5,MMUT,RPS27A,TXN,UBA52,UBC,SPRY2,RASGRP1,ARL6IP5,ERP29,CHI3L1,DVL2,FN1,GNG3,LAMTOR2,ARAF,PIN1,PPIA,STRADB,PRKAA1,PSME1,RPS3,CX3CL1,SKP1,PINK1,PRDX2,THBS1,UBE2V1,YWHAB,CALM1,PABPN1,PEA15,CD81,RPLP1,RPS2,STUB1,UBE2S,CDK5R1,TOM1L1,JTB,CALM3,RACK1,GABARAPL2,PIH1D1,CLU,EFNA3,EPHB6,ITGB3,THY1,CCK,…
3.AD/0.HA	GABA_neurons	Down	GO BP	GOBP_PEPTIDYL_CYSTEINE_MODIFICATION	GOBP_PEPTIDYL_CYSTEINE_MODIFICATION	1.70163	0.0096484	0.178692	PARK7,TXN,GAPDH,ADH5,TMX3,ZDHHC22,ZDHHC4
3.AD/0.HA	GABA_neurons	Down	GO BP	GOBP_CARBOHYDRATE_DERIVATIVE_METABOLIC_PROCESS	GOBP_CARBOHYDRATE_DERIVATIVE_METABOLIC_PROCESS	0.471904	0.009707	0.178893	PARK7,DCN,DLD,HMGCS1,NPPC,PSAP,AAAS,ACOT4,TECR,MT3,ATP6V0C,ENO1,TDG,CHI3L1,PRKAA1,PINK1,GAPDH,PGM2L1,B3GALNT1,B3GALT2,LUM,GPC3,GCNT1,MPC2,NME1,NME2,CST3,CTSL,ALDOC,STOML2,ASAH1,PGAM1,VEGFB,NAGPA,ENO2,GALT,B3GAT3,PFKM,TPI1,B4GALT4,B4GAT1,OGA,DPAGT1,CMAS,PMVK,AKR1C2,NUDT10,NUDT11,DHDDS,DPM2,MCCC2,ATP5PD,ATP5F1D,ATP5F1E,ATP5MC1,ATP5MC2,ATP5MC3,ATP5ME,ATP5PF,ATP5PO,UQCC3,ATP5MF,AK1,NME3,ERH,TK2,UPP1,…
3.AD/0.HA	GABA_neurons	Down	GO BP	GOBP_NEGATIVE_REGULATION_OF_TRANSFORMING_GROWTH_FACTOR_BETA_RECEPTOR_SIGNALING_PATHWAY	GOBP_NEGATIVE_REGULATION_OF_TRANSFORMING_GROWTH_FACTOR_BETA_RECEPTOR_SIGNALING_PATHWAY	1.35397	0.00976972	0.178893	UBB,EID2,RPS27A,UBA52,UBC,SPRY2,PIN1,STUB1,ASPN,PEG10
3.AD/0.HA	GABA_neurons	Down	GO BP	GOBP_REGULATION_OF_PROTEIN_TARGETING	GOBP_REGULATION_OF_PROTEIN_TARGETING	1.35397	0.00976972	0.178893	CDK5,PRKAA1,PINK1,CDK5R1,UBL5,TOMM7,ATP5IF1,HPCA,PRNP,PDCD5
3.AD/0.HA	GABA_neurons	Down	GO BP	GOBP_REGULATION_OF_PROTEASOMAL_UBIQUITIN_DEPENDENT_PROTEIN_CATABOLIC_PROCESS	GOBP_REGULATION_OF_PROTEASOMAL_UBIQUITIN_DEPENDENT_PROTEIN_CATABOLIC_PROCESS	1.1213	0.00982136	0.178893	BCAP31,PARK7,HSP90AB1,RPL11,SH3RF2,ARAF,STUB1,RACK1,TAF9,CLU,DDRGK1,RAD23A,ELOB,CAMLG
3.AD/0.HA	GABA_neurons	Down	GO BP	GOBP_POSITIVE_REGULATION_OF_CALCIUM_ION_TRANSMEMBRANE_TRANSPORT	GOBP_POSITIVE_REGULATION_OF_CALCIUM_ION_TRANSMEMBRANE_TRANSPORT	1.44418	0.00982349	0.178893	RGN,CDK5,CX3CL1,CALM1,CALM3,THY1,CALM2,ATP1B1,SRI
3.AD/0.HA	GABA_neurons	Down	GO BP	GOBP_REGULATION_OF_PROTEIN_KINASE_ACTIVITY	GOBP_REGULATION_OF_PROTEIN_KINASE_ACTIVITY	0.551238	0.0101976	0.185086	PARK7,HSP90AB1,CCN1,PRKAR1A,SFRP1,SOD1,UBB,PPP1R1B,RGN,TRAF7,MT3,CDK5RAP3,CDK5,RPS27A,TXN,UBA52,UBC,SPRY2,RASGRP1,ERP29,CHI3L1,DVL2,GNG3,LAMTOR2,GSTP1,ARAF,PPIA,STRADB,CAMK2N1,PRKAA1,RPS3,CEACAM1,PINK1,PRDX2,THBS1,UBE2V1,UCHL1,YWHAB,CALM1,PEA15,CD81,RPLP1,CDK5R1,TOM1L1,CDKN2D,JTB,CALM3,RACK1,CDC37,PIH1D1,CLU,ITGB3,THY1,CALM2,PRNP,MTCP1,CAMKK1
3.AD/0.HA	GABA_neurons	Down	GO BP	GOBP_NUCLEOTIDE_PHOSPHORYLATION	GOBP_NUCLEOTIDE_PHOSPHORYLATION	1.10894	0.0103746	0.18529	AAAS,ENO1,PRKAA1,GAPDH,PGM2L1,NME1,NME2,ALDOC,PGAM1,ENO2,PFKM,TPI1,AK1,NME3
3.AD/0.HA	GABA_neurons	Down	GO BP	GOBP_REGULATION_OF_PROTEIN_EXIT_FROM_ENDOPLASMIC_RETICULUM	GOBP_REGULATION_OF_PROTEIN_EXIT_FROM_ENDOPLASMIC_RETICULUM	2.10756	0.0103801	0.18529	BCAP31,CD81,INSIG1,TMEM30A,SAR1B
3.AD/0.HA	GABA_neurons	Down	GO BP	GOBP_GLOBAL_GENOME_NUCLEOTIDE_EXCISION_REPAIR	GOBP_GLOBAL_GENOME_NUCLEOTIDE_EXCISION_REPAIR	2.10756	0.0103801	0.18529	CETN2,UBB,RPS27A,UBA52,UBC
3.AD/0.HA	GABA_neurons	Down	GO BP	GOBP_REGULATION_OF_INTRINSIC_APOPTOTIC_SIGNALING_PATHWAY_BY_P53_CLASS_MEDIATOR	GOBP_REGULATION_OF_INTRINSIC_APOPTOTIC_SIGNALING_PATHWAY_BY_P53_CLASS_MEDIATOR	2.10756	0.0103801	0.18529	UBB,RPL11,RPL26,RPS7,TAF9
3.AD/0.HA	GABA_neurons	Down	GO BP	GOBP_CYTOCHROME_COMPLEX_ASSEMBLY	GOBP_CYTOCHROME_COMPLEX_ASSEMBLY	1.85689	0.010447	0.18529	COX15,UQCRFS1,UQCC3,COA3,PET100,COX14
3.AD/0.HA	GABA_neurons	Down	GO BP	GOBP_TRANSFERRIN_TRANSPORT	GOBP_TRANSFERRIN_TRANSPORT	1.85689	0.010447	0.18529	ATP6V1B2,ATP6V0C,ATP6V0B,ATP6AP1,ATP6V1F,ATP6V1G1
3.AD/0.HA	GABA_neurons	Down	GO BP	GOBP_REGULATION_OF_INTRINSIC_APOPTOTIC_SIGNALING_PATHWAY_IN_RESPONSE_TO_DNA_DAMAGE	GOBP_REGULATION_OF_INTRINSIC_APOPTOTIC_SIGNALING_PATHWAY_IN_RESPONSE_TO_DNA_DAMAGE	1.85689	0.010447	0.18529	RPL26,RPS3,CDKN2D,TAF9,CLU,TPT1
3.AD/0.HA	GABA_neurons	Down	GO BP	GOBP_CELLULAR_RESPONSE_TO_HYDROGEN_PEROXIDE	GOBP_CELLULAR_RESPONSE_TO_HYDROGEN_PEROXIDE	1.33371	0.0106188	0.187117	PARK7,TXN,PRKAA1,MAPK13,RPS3,PINK1,APEX1,PPIF,RACK1,MAP1LC3A
3.AD/0.HA	GABA_neurons	Down	GO BP	GOBP_NEGATIVE_REGULATION_OF_PROTEASOMAL_PROTEIN_CATABOLIC_PROCESS	GOBP_NEGATIVE_REGULATION_OF_PROTEASOMAL_PROTEIN_CATABOLIC_PROCESS	1.66502	0.0108364	0.189724	PARK7,HSP90AB1,RPL11,GABARAPL2,TAF9,DDRGK1,CAMLG
3.AD/0.HA	GABA_neurons	Down	GO BP	GOBP_ACTIVATION_OF_PROTEIN_KINASE_ACTIVITY	GOBP_ACTIVATION_OF_PROTEIN_KINASE_ACTIVITY	0.779477	0.0113714	0.198453	PARK7,PRKAR1A,SOD1,UBB,TRAF7,MT3,RPS27A,TXN,UBA52,UBC,ERP29,CHI3L1,GNG3,LAMTOR2,ARAF,PPIA,STRADB,PRKAA1,PINK1,PRDX2,THBS1,UBE2V1,PEA15,CD81,RPLP1,CDK5R1,TOM1L1,ITGB3
3.AD/0.HA	GABA_neurons	Down	GO BP	GOBP_MYELOID_LEUKOCYTE_ACTIVATION	GOBP_MYELOID_LEUKOCYTE_ACTIVATION	0.590061	0.01145	0.199186	HSP90AB1,MGST1,PSAP,RAB3A,DYNLL1,FTH1,FTL,ATP6V0C,B2M,NR1D1,ATP6AP2,CHI3L1,LAMTOR2,GSTP1,PPIA,LAMTOR1,PSMB1,CEACAM1,CX3CL1,THBS1,TUBB4B,HSPA8,CLU,VAMP2,FABP5,PTGES2,NME2,PGRMC1,CHGA,CST3,CSTB,EEF1A1,ALDOC,COMMD3,COMMD9,HLA-C,ASAH1,CD200,NDUFC2,PGAM1,TMEM30A,TRAPPC1,SRP14,CAPN1,CYSTM1,DEGS1,GGH,NAPRT,CD63
3.AD/0.HA	GABA_neurons	Down	GO BP	GOBP_PEROXISOME_ORGANIZATION	GOBP_PEROXISOME_ORGANIZATION	1.31373	0.0115227	0.199813	UBB,ACOT4,RPS27A,UBA52,UBC,PEX7,GSTK1,PEX10,PEX11A,PEX11B
3.AD/0.HA	GABA_neurons	Down	GO BP	GOBP_PEPTIDYL_PROLINE_MODIFICATION	GOBP_PEPTIDYL_PROLINE_MODIFICATION	1.50785	0.0116166	0.200802	PPID,PIN1,PPIA,PPIF,PPIB,FKBP14,P4HTM,P4HA3
3.AD/0.HA	GABA_neurons	Down	GO BP	GOBP_MODIFICATION_DEPENDENT_MACROMOLECULE_CATABOLIC_PROCESS	GOBP_MODIFICATION_DEPENDENT_MACROMOLECULE_CATABOLIC_PROCESS	0.582554	0.0116613	0.200935	BCAP31,PARK7,HSP90AB1,UBB,NDFIP1,RPL5,RPL11,ANAPC15,ANAPC11,KAT5,RPS27A,UBA52,UBC,RPL23,SH3RF2,ARAF,PSMA3,PSMA7,PSMB1,PSMB6,PSMB10,PSME1,SKP1,PINK1,UCHL1,RPS7,STUB1,RNF187,RNF167,UBE2S,FBXL15,TOM1L1,RACK1,TAF9,CLU,DDRGK1,PDCL3,RAD23A,ELOC,ELOB,ZFAND2B,NEDD8,VPS28,JKAMP,RHBDD2,TMUB2,CAMLG,USP11,SPSB3
3.AD/0.HA	GABA_neurons	Down	GO BP	GOBP_REGULATION_OF_MITOCHONDRIAL_MEMBRANE_PERMEABILITY	GOBP_REGULATION_OF_MITOCHONDRIAL_MEMBRANE_PERMEABILITY	1.39661	0.0117681	0.202137	VDAC2,YWHAB,PPIF,ATP5IF1,YWHAH,CHCHD10,SLC25A5,TMEM14A,RHOT2
3.AD/0.HA	GABA_neurons	Down	GO BP	GOBP_STEROL_METABOLIC_PROCESS	GOBP_STEROL_METABOLIC_PROCESS	1.01528	0.0118549	0.202987	HMGCS1,SOD1,MT3,PRKAA1,EBP,INSIG1,CYB5R1,GNB3,PMVK,FDPS,IDI1,NFE2L1,MSMO1,SC5D,TM7SF2,PIP4P1
3.AD/0.HA	GABA_neurons	Down	GO BP	GOBP_POSITIVE_REGULATION_OF_CALCIUM_ION_TRANSMEMBRANE_TRANSPORTER_ACTIVITY	GOBP_POSITIVE_REGULATION_OF_CALCIUM_ION_TRANSMEMBRANE_TRANSPORTER_ACTIVITY	1.80949	0.0119286	0.20361	RGN,CDK5,CALM1,CALM3,CALM2,ATP1B1
3.AD/0.HA	GABA_neurons	Down	GO BP	GOBP_REGULATION_OF_TRANSMEMBRANE_RECEPTOR_PROTEIN_SERINE_THREONINE_KINASE_SIGNALING_PATHWAY	GOBP_REGULATION_OF_TRANSMEMBRANE_RECEPTOR_PROTEIN_SERINE_THREONINE_KINASE_SIGNALING_PATHWAY	0.87969	0.0120516	0.204704	FST,HES1,HSP90AB1,CCN1,SFRP1,UBB,EID2,RPS27A,UBA52,UBC,SPRY2,BMPER,PIN1,THBS1,STUB1,FBXL15,CHRD,GPC3,ASPN,TGFBR3L,GOT1,PEG10
3.AD/0.HA	GABA_neurons	Down	GO BP	GOBP_ISOPRENOID_METABOLIC_PROCESS	GOBP_ISOPRENOID_METABOLIC_PROCESS	1.09183	0.0121377	0.205248	HMGCS1,RBP4,GPC3,ALDH1A2,ADH5,SCPEP1,DPAGT1,PMVK,FDPS,IDI1,BCO1,DHDDS,DPM2,CRABP1,RBP2
3.AD/0.HA	GABA_neurons	Down	GO BP	GOBP_POSITIVE_REGULATION_OF_PROTEIN_AUTOPHOSPHORYLATION	GOBP_POSITIVE_REGULATION_OF_PROTEIN_AUTOPHOSPHORYLATION	2.0404	0.0122002	0.205651	NBN,CALM1,TOM1L1,CALM3,CALM2
3.AD/0.HA	GABA_neurons	Down	GO BP	GOBP_POSTTRANSCRIPTIONAL_REGULATION_OF_GENE_EXPRESSION	GOBP_POSTTRANSCRIPTIONAL_REGULATION_OF_GENE_EXPRESSION	0.586659	0.0122371	0.205651	MEIOC,IGFBP5,DND1,UBB,AAAS,RPL5,RPL10,RPL38,RPS14,RPL26,RPS27A,UBA52,UBC,RPUSD4,PSMA3,PSMA7,PSMB1,PSMB6,PSMB10,PSME1,RPS3,PINK1,THBS1,YWHAB,RPL13A,RPL22,RPL30,RPS4X,RPS9,GAPDH,PPP1CA,APEX1,RACK1,NUDT21,CIRBP,HSPA8,POLR2I,POLR2K,POLR2L,CDC37,EIF4A2,EIF1,EIF1B,SRP9,ENC1,COA3
3.AD/0.HA	GABA_neurons	Down	GO BP	GOBP_REGULATION_OF_MEMBRANE_PERMEABILITY	GOBP_REGULATION_OF_MEMBRANE_PERMEABILITY	1.29401	0.0124836	0.208126	VDAC2,MT3,YWHAB,PPIF,ATP5IF1,YWHAH,CHCHD10,SLC25A5,TMEM14A,RHOT2
3.AD/0.HA	GABA_neurons	Down	GO BP	GOBP_MORPHOGENESIS_OF_A_POLARIZED_EPITHELIUM	GOBP_MORPHOGENESIS_OF_A_POLARIZED_EPITHELIUM	1.08056	0.0124849	0.208126	SFRP1,DVL2,PSMA3,PSMA7,PSMB1,PSMB6,PSMB10,PSME1,SPEF1,GPC3,PFN1,AP2M1,AP2S1,ACTG1,FZD6
3.AD/0.HA	GABA_neurons	Down	GO BP	GOBP_REGULATION_OF_SPHINGOLIPID_BIOSYNTHETIC_PROCESS	GOBP_REGULATION_OF_SPHINGOLIPID_BIOSYNTHETIC_PROCESS	2.36941	0.0128489	0.213299	CCN1,PRKAA1,RACK1,ORMDL1
3.AD/0.HA	GABA_neurons	Down	GO BP	GOBP_NEGATIVE_REGULATION_OF_CELL_DEATH	GOBP_NEGATIVE_REGULATION_OF_CELL_DEATH	0.490605	0.0130153	0.215406	SLC25A4,PARK7,GPX4,HSP90AB1,CCN1,SERPINF1,RPS6,SFRP1,SOD1,UBB,VDAC2,RGN,RPL10,MT3,SLC39A10,CDK5,ENO1,RPS27A,TXN,UBA52,UBC,SPRY2,SH3RF2,GSTP1,NENF,ARAF,NEFL,PIN1,PPIA,STRADB,PRKAA1,CX3CL1,PINK1,PRDX2,THBS1,PEA15,RPS3A,CFL1,SPEF1,VPS35,CDKN2D,PPIF,RACK1,PRDX5,PIH1D1,TAF9,CLU,LAMTOR5,DDRGK1,NME2,CHGA,IL7,CD200,ARL6IP1,SLC25A5,HYOU1,PM20D1,NDUFS3,NDUFA13,BEX3,SNCB,TPT1,TMEM14A,GRINA,HIGD1A,PTRH2,IER3
3.AD/0.HA	GABA_neurons	Down	GO BP	GOBP_GTP_BIOSYNTHETIC_PROCESS	GOBP_GTP_BIOSYNTHETIC_PROCESS	2.95354	0.0131539	0.216384	NME1,NME2,NME3
3.AD/0.HA	GABA_neurons	Down	GO BP	GOBP_PROTEIN_INSERTION_INTO_ER_MEMBRANE_BY_STOP_TRANSFER_MEMBRANE_ANCHOR_SEQUENCE	GOBP_PROTEIN_INSERTION_INTO_ER_MEMBRANE_BY_STOP_TRANSFER_MEMBRANE_ANCHOR_SEQUENCE	2.95354	0.0131539	0.216384	EMC10,EMC7,EMC6
3.AD/0.HA	GABA_neurons	Down	GO BP	GOBP_RESPONSE_TO_OXYGEN_LEVELS	GOBP_RESPONSE_TO_OXYGEN_LEVELS	0.720056	0.0132477	0.21727	ANGPT2,NPPC,SFRP1,UBB,MT3,ATP6AP1,ATP6V1G1,BACH1,ENO1,RPS27A,UBA52,UBC,PIN1,PRKAA1,PSMA3,PSMA7,PSMB1,PSMB6,PSMB10,PSME1,PINK1,THBS1,STUB1,FUNDC1,ATP1B1,VEGFB,HYOU1,CHCHD2,ELOC,ELOB,HIGD1A
3.AD/0.HA	GABA_neurons	Down	GO BP	GOBP_NUCLEOTIDE_EXCISION_REPAIR	GOBP_NUCLEOTIDE_EXCISION_REPAIR	1.19811	0.0134483	0.219897	CETN2,UBB,RPS27A,UBA52,UBC,RPA3,COPS6,POLR2I,POLR2K,POLR2L,HMGN1,RAD23A
3.AD/0.HA	GABA_neurons	Down	GO BP	GOBP_INTRACILIARY_TRANSPORT_INVOLVED_IN_CILIUM_ASSEMBLY	GOBP_INTRACILIARY_TRANSPORT_INVOLVED_IN_CILIUM_ASSEMBLY	1.7636	0.0135521	0.220361	DYNLL1,DYNLL2,DYNC2LI1,IFT46,DYNLRB2,DYNLRB1
3.AD/0.HA	GABA_neurons	Down	GO BP	GOBP_CYTOSKELETON_DEPENDENT_INTRACELLULAR_TRANSPORT	GOBP_CYTOSKELETON_DEPENDENT_INTRACELLULAR_TRANSPORT	0.929692	0.0136404	0.221048	MAK,SOD1,UBB,DYNLL1,NEFL,TUBA1B,TUBA1A,HSPA8,SYT4,DYNLL2,BLOC1S1,RHOT2,LCA5L,DYNC2LI1,IFT46,DYNLRB2,DYNLRB1,CALY
3.AD/0.HA	GABA_neurons	Down	GO BP	GOBP_REGULATION_OF_MITOCHONDRION_ORGANIZATION	GOBP_REGULATION_OF_MITOCHONDRION_ORGANIZATION	1.04712	0.0137374	0.22196	PARK7,DCN,PINK1,YWHAB,VPS35,PPIF,ATP5IF1,CLU,YWHAH,CHCHD10,MLLT11,PDCD5,SLC25A5,TMEM14A,RHOT2
3.AD/0.HA	GABA_neurons	Down	GO BP	GOBP_REGULATION_OF_CELLULAR_AMINO_ACID_METABOLIC_PROCESS	GOBP_REGULATION_OF_CELLULAR_AMINO_ACID_METABOLIC_PROCESS	1.45219	0.0140798	0.226817	PARK7,PSMA3,PSMA7,PSMB1,PSMB6,PSMB10,PSME1,OAZ1
3.AD/0.HA	GABA_neurons	Down	GO BP	GOBP_METAL_ION_HOMEOSTASIS	GOBP_METAL_ION_HOMEOSTASIS	0.576211	0.0141821	0.227174	BCAP31,SOD1,TAC1,RGN,TMEM203,NDFIP1,ISCU,FTH1,FTL,MT3,ATOX1,SLC22A17,ATP6AP1,B2M,SLC39A10,SLC30A3,SLC39A7,ATP6V1G1,CDK5,GNG3,CAMK2N1,CX3CL1,SKP1,CALM1,ARF1,CALM3,THY1,CALM2,SV2A,ATP1B1,SCN7A,SRI,CALB1,PTGER3,LPAR6,STOML2,PRNP,SELENOK,GOT1,NEDD8,SLC24A5,TMCO1,TPT1,SMDT1,MTLN,GRINA,MT1X,CALB2
3.AD/0.HA	GABA_neurons	Down	GO BP	GOBP_PHAGOSOME_ACIDIFICATION	GOBP_PHAGOSOME_ACIDIFICATION	1.97626	0.014225	0.227174	ATP6V1B2,ATP6V0C,ATP6V0B,ATP6V1F,ATP6V1G1
3.AD/0.HA	GABA_neurons	Down	GO BP	GOBP_CELLULAR_RESPONSE_TO_REACTIVE_OXYGEN_SPECIES	GOBP_CELLULAR_RESPONSE_TO_REACTIVE_OXYGEN_SPECIES	1.03614	0.014227	0.227174	PARK7,SOD1,MT3,TXN,PRKAA1,MAPK13,RPS3,PINK1,PRDX2,APEX1,PPIF,RACK1,PRDX5,PRDX1,MAP1LC3A
3.AD/0.HA	GABA_neurons	Down	GO BP	GOBP_PROTEOLYSIS	GOBP_PROTEOLYSIS	0.371524	0.0148175	0.235222	BCAP31,SPINT2,PARK7,DLD,HSP90AB1,CCN1,SERPINF1,PITHD1,PZP,SFRP1,UBB,RGN,NDFIP1,RPL5,RPL11,MT3,ANAPC15,ANAPC11,CDK5,KAT5,ENO1,RPS27A,UBA52,UBC,RPL23,NR1D1,ATP6AP2,ARL6IP5,SH3RF2,FN1,ARAF,PEBP1,CAMK2N1,PSMA3,PSMA7,PSMB1,PSMB6,PSMB10,PSME1,RPS3,SKP1,PINK1,THBS1,UCHL1,RPS7,STUB1,RNF187,RNF167,UBE2S,OTUB1,FBXL15,GAPDH,TOM1L1,CDKN2D,AURKAIP1,TAF10,RACK1,PRDX5,COPS6,GABARAPL2,ATP5IF1,PIH1D1,TAF9,CLU,EFN…
3.AD/0.HA	GABA_neurons	Down	GO BP	GOBP_MATURATION_OF_SSU_RRNA	GOBP_MATURATION_OF_SSU_RRNA	1.56042	0.0150344	0.237282	RPS14,RPS28,RPS8,RPS16,RPS21,SNU13,TSR2
3.AD/0.HA	GABA_neurons	Down	GO BP	GOBP_REGULATION_OF_SIGNAL_TRANSDUCTION_BY_P53_CLASS_MEDIATOR	GOBP_REGULATION_OF_SIGNAL_TRANSDUCTION_BY_P53_CLASS_MEDIATOR	0.969295	0.0152242	0.239077	NBN,RAD1,UBB,RPL5,RPL11,RPL26,CDK5RAP3,CDK5,KAT5,RPL23,PIN1,PRKAA1,RPS7,CDK5R1,RPA3,TAF10,TAF9
3.AD/0.HA	GABA_neurons	Down	GO BP	GOBP_BASE_EXCISION_REPAIR	GOBP_BASE_EXCISION_REPAIR	1.71912	0.0153237	0.239077	POLQ,TDG,RPS3,APEX1,RPA3,MPG
3.AD/0.HA	GABA_neurons	Down	GO BP	GOBP_DNA_DAMAGE_RESPONSE_DETECTION_OF_DNA_DAMAGE	GOBP_DNA_DAMAGE_RESPONSE_DETECTION_OF_DNA_DAMAGE	1.71912	0.0153237	0.239077	UBB,RPS27A,UBA52,UBC,RPS3,RPA3
3.AD/0.HA	GABA_neurons	Down	GO BP	GOBP_NEGATIVE_REGULATION_OF_PEPTIDYL_THREONINE_PHOSPHORYLATION	GOBP_NEGATIVE_REGULATION_OF_PEPTIDYL_THREONINE_PHOSPHORYLATION	2.26987	0.0156118	0.242183	SPRY2,CALM1,CALM3,CALM2
3.AD/0.HA	GABA_neurons	Down	GO BP	GOBP_PROTEIN_INSERTION_INTO_ER_MEMBRANE	GOBP_PROTEIN_INSERTION_INTO_ER_MEMBRANE	2.26987	0.0156118	0.242183	EMC10,EMC7,GET1,EMC6
3.AD/0.HA	GABA_neurons	Down	GO BP	GOBP_POSITIVE_REGULATION_OF_ANION_TRANSPORT	GOBP_POSITIVE_REGULATION_OF_ANION_TRANSPORT	0.631673	0.0158745	0.245559	BCAP31,HSP90AB1,RBP4,TAC1,DYNLL1,CDK5,PPID,PPIA,CAMK2N1,PRKAA1,PINK1,YWHAB,CD81,CDK5R1,ARF1,RACK1,UBL5,TOMM7,YWHAH,CCK,HPCA,GPC3,VAMP2,SRI,MPC2,PHPT1,VSNL1,TMEM30A,PRNP,PDCD5,ARL6IP1,SAR1B,NNAT,B3GAT3,FABP3,OAZ1,VPS28
3.AD/0.HA	GABA_neurons	Down	GO BP	GOBP_TRANSPORT_ALONG_MICROTUBULE	GOBP_TRANSPORT_ALONG_MICROTUBULE	1.00369	0.0159202	0.245567	MAK,SOD1,UBB,DYNLL1,NEFL,HSPA8,DYNLL2,BLOC1S1,RHOT2,LCA5L,DYNC2LI1,IFT46,DYNLRB2,DYNLRB1,CALY
2.MCI/1.YC	GABA_neurons	Up	GO BP	GOBP_OXIDATIVE_PHOSPHORYLATION	GOBP_OXIDATIVE_PHOSPHORYLATION	4.86128	2.2945e-14	1.24935e-10	MT-ND5,MT-ND6,MT-ND4,MT-ATP6,MT-ATP8,MT-CO1,MT-CO2,MT-CO3,MT-CYB,MT-ND1,MT-ND2,MT-ND3,MT-ND4L
2.MCI/1.YC	GABA_neurons	Up	GO BP	GOBP_ATP_SYNTHESIS_COUPLED_ELECTRON_TRANSPORT	GOBP_ATP_SYNTHESIS_COUPLED_ELECTRON_TRANSPORT	5.18456	1.99188e-13	5.42289e-10	MT-ND5,MT-ND6,MT-ND4,MT-CO1,MT-CO2,MT-CO3,MT-CYB,MT-ND1,MT-ND2,MT-ND3,MT-ND4L
2.MCI/1.YC	GABA_neurons	Up	GO BP	GOBP_RESPIRATORY_ELECTRON_TRANSPORT_CHAIN	GOBP_RESPIRATORY_ELECTRON_TRANSPORT_CHAIN	4.92179	1.24274e-12	2.25557e-09	MT-ND5,MT-ND6,MT-ND4,MT-CO1,MT-CO2,MT-CO3,MT-CYB,MT-ND1,MT-ND2,MT-ND3,MT-ND4L
2.MCI/1.YC	GABA_neurons	Up	GO BP	GOBP_ELECTRON_TRANSPORT_CHAIN	GOBP_ELECTRON_TRANSPORT_CHAIN	4.25835	1.24351e-10	1.69273e-07	MT-ND5,MT-ND6,MT-ND4,MT-CO1,MT-CO2,MT-CO3,MT-CYB,MT-ND1,MT-ND2,MT-ND3,MT-ND4L
2.MCI/1.YC	GABA_neurons	Up	GO BP	GOBP_CELLULAR_RESPIRATION	GOBP_CELLULAR_RESPIRATION	4.16232	2.42088e-10	2.63634e-07	MT-ND5,MT-ND6,MT-ND4,MT-CO1,MT-CO2,MT-CO3,MT-CYB,MT-ND1,MT-ND2,MT-ND3,MT-ND4L
2.MCI/1.YC	GABA_neurons	Up	GO BP	GOBP_ATP_METABOLIC_PROCESS	GOBP_ATP_METABOLIC_PROCESS	3.67451	3.64722e-10	3.30985e-07	MT-ND5,MT-ND6,MT-ND4,MT-ATP6,MT-ATP8,MT-CO1,MT-CO2,MT-CO3,MT-CYB,MT-ND1,MT-ND2,MT-ND3,MT-ND4L
2.MCI/1.YC	GABA_neurons	Up	GO BP	GOBP_MITOCHONDRIAL_ELECTRON_TRANSPORT_NADH_TO_UBIQUINONE	GOBP_MITOCHONDRIAL_ELECTRON_TRANSPORT_NADH_TO_UBIQUINONE	5.32584	2.17241e-09	1.68982e-06	MT-ND5,MT-ND6,MT-ND4,MT-ND1,MT-ND2,MT-ND3,MT-ND4L
2.MCI/1.YC	GABA_neurons	Up	GO BP	GOBP_ENERGY_DERIVATION_BY_OXIDATION_OF_ORGANIC_COMPOUNDS	GOBP_ENERGY_DERIVATION_BY_OXIDATION_OF_ORGANIC_COMPOUNDS	3.54744	1.62963e-08	1.10917e-05	MT-ND5,MT-ND6,MT-ND4,MT-CO1,MT-CO2,MT-CO3,MT-CYB,MT-ND1,MT-ND2,MT-ND3,MT-ND4L
2.MCI/1.YC	GABA_neurons	Up	GO BP	GOBP_GENERATION_OF_PRECURSOR_METABOLITES_AND_ENERGY	GOBP_GENERATION_OF_PRECURSOR_METABOLITES_AND_ENERGY	2.87365	1.88372e-07	0.000113965	MT-ND5,MT-ND6,MT-ND4,MT-ATP6,MT-ATP8,MT-CO1,MT-CO2,MT-CO3,MT-CYB,MT-ND1,MT-ND2,MT-ND3,MT-ND4L
2.MCI/1.YC	GABA_neurons	Up	GO BP	GOBP_PROTON_TRANSMEMBRANE_TRANSPORT	GOBP_PROTON_TRANSMEMBRANE_TRANSPORT	3.87932	2.36425e-07	0.000128734	MT-ND5,MT-ND4,MT-ATP6,MT-ATP8,MT-CO1,MT-CO2,MT-CO3,MT-CYB
2.MCI/1.YC	GABA_neurons	Up	GO BP	GOBP_NADH_DEHYDROGENASE_COMPLEX_ASSEMBLY	GOBP_NADH_DEHYDROGENASE_COMPLEX_ASSEMBLY	4.72208	2.92159e-07	0.000144619	MT-ND5,MT-ND6,MT-ND4,MT-ND1,MT-ND2,MT-ND3
2.MCI/1.YC	GABA_neurons	Up	GO BP	GOBP_CATION_TRANSPORT	GOBP_CATION_TRANSPORT	2.16052	3.05001e-06	0.00138394	CNR1,SYT6,CHRNA7,ADRA1A,MT-ND5,CHRNA1,MT-ND4,KCNG2,MT-ATP6,MT-ATP8,MT-CO1,MT-CO2,MT-CO3,MT-CYB,SLC25A48,KCNN3,TRPM3
2.MCI/1.YC	GABA_neurons	Up	GO BP	GOBP_MITOCHONDRIAL_RESPIRATORY_CHAIN_COMPLEX_ASSEMBLY	GOBP_MITOCHONDRIAL_RESPIRATORY_CHAIN_COMPLEX_ASSEMBLY	4.03181	3.98396e-06	0.00166867	MT-ND5,MT-ND6,MT-ND4,MT-ND1,MT-ND2,MT-ND3
2.MCI/1.YC	GABA_neurons	Up	GO BP	GOBP_TRANSMEMBRANE_TRANSPORT	GOBP_TRANSMEMBRANE_TRANSPORT	1.9591	4.38098e-06	0.00170389	CHRNA7,MT-ND5,CHRNA1,MT-ND4,KCNG2,SLC16A12,SLCO1C1,MT-ATP6,MT-ATP8,MT-CO1,MT-CO2,MT-CO3,MT-CYB,SLC19A3,SLC25A48,KCNN3,TRPM3,GABRG1,CHRFAM7A,SLC26A11
2.MCI/1.YC	GABA_neurons	Up	GO BP	GOBP_INORGANIC_ION_TRANSMEMBRANE_TRANSPORT	GOBP_INORGANIC_ION_TRANSMEMBRANE_TRANSPORT	2.25744	8.45251e-06	0.00306826	CHRNA7,MT-ND5,MT-ND4,KCNG2,MT-ATP6,MT-ATP8,MT-CO1,MT-CO2,MT-CO3,MT-CYB,KCNN3,TRPM3,GABRG1,SLC26A11
2.MCI/1.YC	GABA_neurons	Up	GO BP	GOBP_AEROBIC_RESPIRATION	GOBP_AEROBIC_RESPIRATION	3.99533	2.8001e-05	0.00952909	MT-ND4,MT-CO1,MT-CO2,MT-CO3,MT-ND1
2.MCI/1.YC	GABA_neurons	Up	GO BP	GOBP_RESPONSE_TO_NICOTINE	GOBP_RESPONSE_TO_NICOTINE	4.69137	3.06106e-05	0.0098044	CNR1,CHRNA7,MT-ND6,MT-ND4
2.MCI/1.YC	GABA_neurons	Up	GO BP	GOBP_CATION_TRANSMEMBRANE_TRANSPORT	GOBP_CATION_TRANSMEMBRANE_TRANSPORT	2.07593	5.53667e-05	0.0167484	CHRNA7,MT-ND5,MT-ND4,KCNG2,MT-ATP6,MT-ATP8,MT-CO1,MT-CO2,MT-CO3,MT-CYB,SLC25A48,KCNN3,TRPM3
2.MCI/1.YC	GABA_neurons	Up	GO BP	GOBP_MITOCHONDRIAL_ELECTRON_TRANSPORT_CYTOCHROME_C_TO_OXYGEN	GOBP_MITOCHONDRIAL_ELECTRON_TRANSPORT_CYTOCHROME_C_TO_OXYGEN	5.4526	7.59188e-05	0.0217567	MT-CO1,MT-CO2,MT-CO3
2.MCI/1.YC	GABA_neurons	Up	GO BP	GOBP_SYNAPTIC_TRANSMISSION_CHOLINERGIC	GOBP_SYNAPTIC_TRANSMISSION_CHOLINERGIC	4.89609	0.000212998	0.0579888	CHRNA7,CHRNA1,CHRFAM7A
2.MCI/1.YC	GABA_neurons	Up	GO BP	MANGO	MANGO neurogenesis	2.36735	0.000328167	0.085089	CNR1,CNTFR,NR2E1,CHRNA7,ADRA1A,ALK,CHRFAM7A,NPAS3
2.MCI/1.YC	GABA_neurons	Up	GO BP	GOBP_POSITIVE_REGULATION_OF_BLOOD_PRESSURE	GOBP_POSITIVE_REGULATION_OF_BLOOD_PRESSURE	4.63357	0.000349467	0.086493	CNR1,NR2F2,ADRA1A
2.MCI/1.YC	GABA_neurons	Up	GO BP	GOBP_SYNAPTIC_SIGNALING	GOBP_SYNAPTIC_SIGNALING	1.93731	0.000670499	0.158733	CNR1,SYT6,NR2E1,CHRNA7,ADRA1A,CHRNA1,OPRK1,GABRG1,LYPD1,CHRFAM7A
2.MCI/1.YC	GABA_neurons	Up	GO BP	GOBP_SYNAPTIC_TRANSMISSION_GABAERGIC	GOBP_SYNAPTIC_TRANSMISSION_GABAERGIC	4.1125	0.000935244	0.212184	CNR1,ADRA1A,GABRG1
2.MCI/1.YC	GABA_neurons	Up	GO BP	GOBP_POSITIVE_REGULATION_OF_SYSTEMIC_ARTERIAL_BLOOD_PRESSURE	GOBP_POSITIVE_REGULATION_OF_SYSTEMIC_ARTERIAL_BLOOD_PRESSURE	5.6109	0.00110807	0.241337	NR2F2,ADRA1A
2.MCI/1.YC	GABA_neurons	Down	GO BP	GOBP_TRANSMEMBRANE_TRANSPORT	GOBP_TRANSMEMBRANE_TRANSPORT	1.30494	6.95987e-05	0.119691	PPARGC1A,TESC,TTYH1,TMEM163,HTR2A,RGS4,ATP10A,ITPR2,SLC46A2,HOMER1,ABCC9,ABCC3,SLC22A8,SLC22A6,SLC38A11,SLC17A7,SLC6A7,ADAMTS8,SLC22A24,KCNV1,SLC25A45,KCNS1,GABRD,ANO3,SV2B,GRIK3,SLC22A9,SLC22A25,SLC22A10
2.MCI/1.YC	GABA_neurons	Down	GO BP	GOBP_TEMPERATURE_HOMEOSTASIS	GOBP_TEMPERATURE_HOMEOSTASIS	2.58726	0.000106935	0.119691	PPARGC1A,ADCYAP1,EGR1,HTR2A,NMU,ALDH1A1,LAMA4,PTGS2
2.MCI/1.YC	GABA_neurons	Down	GO BP	GOBP_INORGANIC_ANION_TRANSPORT	GOBP_INORGANIC_ANION_TRANSPORT	2.58726	0.000106935	0.119691	ROS1,TTYH1,SLC22A8,SLC22A6,SLC17A7,ADAMTS8,GABRD,ANO3
2.MCI/1.YC	GABA_neurons	Down	GO BP	GOBP_SYNAPTIC_SIGNALING	GOBP_SYNAPTIC_SIGNALING	1.6398	0.000111477	0.119691	ADCYAP1,CORT,VGF,HTR2A,RGS4,TPBG,ITPKA,NPTX1,NMU,EGR3,HOMER1,SLC17A7,GABRD,GRM2,SV2B,PHF24,GRIK3
2.MCI/1.YC	GABA_neurons	Down	GO BP	GOBP_SYNAPTIC_TRANSMISSION_GLUTAMATERGIC	GOBP_SYNAPTIC_TRANSMISSION_GLUTAMATERGIC	3.12245	0.000113899	0.119691	ADCYAP1,HTR2A,HOMER1,SLC17A7,GRM2,GRIK3
2.MCI/1.YC	GABA_neurons	Down	GO BP	GOBP_MULTICELLULAR_ORGANISMAL_HOMEOSTASIS	GOBP_MULTICELLULAR_ORGANISMAL_HOMEOSTASIS	1.80506	0.000131891	0.119691	PPARGC1A,ADCYAP1,EGR1,LDB2,HTR2A,MET,SH3GL2,LRRK1,NMU,ALDH1A1,LAMA4,PTGS2,HOMER1,MYO5B
2.MCI/1.YC	GABA_neurons	Down	GO BP	GOBP_CELL_CELL_SIGNALING	GOBP_CELL_CELL_SIGNALING	1.22849	0.000180478	0.140386	ADCYAP1,CORT,EGR1,IGFBP2,VGF,SMAD3,MDFIC,HTR2A,RGS4,TPBG,ITPKA,NPTX1,LGR6,RSPO2,LRRK1,NMU,DPP4,EGR3,FZD6,ITPR2,HOMER1,SLC17A7,TRABD2A,PCSK1,GABRD,GRM2,SV2B,PHF24,GRIK3
2.MCI/1.YC	GABA_neurons	Down	GO BP	GOBP_G_PROTEIN_COUPLED_GLUTAMATE_RECEPTOR_SIGNALING_PATHWAY	GOBP_G_PROTEIN_COUPLED_GLUTAMATE_RECEPTOR_SIGNALING_PATHWAY	4.88606	0.000258112	0.17406	HOMER1,GRM2,GRIK3
2.MCI/1.YC	GABA_neurons	Down	GO BP	GOBP_REGULATION_OF_SYNAPTIC_TRANSMISSION_GLUTAMATERGIC	GOBP_REGULATION_OF_SYNAPTIC_TRANSMISSION_GLUTAMATERGIC	3.24828	0.000287703	0.17406	ADCYAP1,HTR2A,HOMER1,GRM2,GRIK3
3.AD/1.YC	GABA_neurons	Up	GO BP	GOBP_NEURON_DIFFERENTIATION	GOBP_NEURON_DIFFERENTIATION	1.06278	9.44445e-11	5.1425e-07	CNR1,DNM2,EGFR,RIMS1,FLNA,GABRB1,CHD5,TNC,SPTBN4,ROBO2,SALL1,SOS1,TAOK3,PROX1,DLX1,MYT1L,NEDD4L,HIPK2,HDAC1,HMGB1,ZFHX3,NEDD4,NFIB,TCF3,NR2F1,NR2E1,HDAC9,ZNF536,CHRNA7,EPHA7,ERBB4,ALK,NCAM1,MINK1,PAK3,LRRC7,ROBO1,IRS2,MAP4,CCDC88A,PARD3,MYO16,ANK3,CEP290,GNAO1,COBL,CDH4,ARMCX5-GPRASP2,PDLIM5,CHL1,UNC5D,DAB1,DSCAM,EPHA5,ALCAM,NTNG1,NLGN1,PALLD,KANK1,KIF13B,GRIP1,CNTNAP2,ITGA4,LAMA3,MYO7A,RERE,ITSN…
3.AD/1.YC	GABA_neurons	Up	GO BP	GOBP_NEUROGENESIS	GOBP_NEUROGENESIS	0.954436	1.02355e-09	2.7866e-06	CNR1,DNM2,EGFR,RIMS1,FLNA,GABRB1,CHD5,TNC,SPTBN4,ROBO2,SALL1,SOS1,TRPC4,TAOK3,PROX1,DLX1,MYT1L,NEDD4L,HIPK2,HDAC1,HMGB1,ZFHX3,NEDD4,NFIB,TCF3,NR2F1,NR2E1,SOX13,HDAC9,ZNF536,CHRNA7,EPHA7,ERBB4,ALK,NCAM1,MINK1,PAK3,LRRC7,ROBO1,IRS2,DNAAF4,MAP4,CCDC88A,PARD3,BMERB1,MYO16,ANK3,SMARCD3,CEP290,GNAO1,COBL,CDH4,ARMCX5-GPRASP2,PDLIM5,CHL1,UNC5D,DAB1,DSCAM,EPHA5,ALCAM,NTNG1,NLGN1,PALLD,KANK1,KIF13B,GRIP1,C…
3.AD/1.YC	GABA_neurons	Up	GO BP	GOBP_NEURON_DEVELOPMENT	GOBP_NEURON_DEVELOPMENT	0.995808	3.58194e-08	4.93118e-05	CNR1,DNM2,EGFR,RIMS1,FLNA,GABRB1,TNC,SPTBN4,ROBO2,SOS1,TAOK3,MYT1L,NEDD4L,HMGB1,NEDD4,NFIB,NR2F1,NR2E1,CHRNA7,EPHA7,ALK,NCAM1,MINK1,PAK3,LRRC7,ROBO1,IRS2,MAP4,CCDC88A,PARD3,MYO16,ANK3,CEP290,GNAO1,COBL,CDH4,ARMCX5-GPRASP2,PDLIM5,CHL1,UNC5D,DAB1,DSCAM,EPHA5,ALCAM,NTNG1,NLGN1,PALLD,KANK1,KIF13B,GRIP1,CNTNAP2,ITGA4,LAMA3,MYO7A,RERE,ITSN2,SHANK1,ATP8A2,PIK3CA,DOCK10,DPYSL5,DSCAML1,ZSWIM5,SHTN1,SGK1,S…
3.AD/1.YC	GABA_neurons	Up	GO BP	GOBP_LOCALIZATION_WITHIN_MEMBRANE	GOBP_LOCALIZATION_WITHIN_MEMBRANE	2.63411	3.62254e-08	4.93118e-05	FLNA,SHISA6,WDR19,PTPRC,DLG2,GRIK2,LRRC7,NLGN1,ITGA4,NRXN1,GRIK5,NRXN2,GSN,LHFPL4,YJEFN3,CACNG2,CACNG4
3.AD/1.YC	GABA_neurons	Up	GO BP	GOBP_CELL_PART_MORPHOGENESIS	GOBP_CELL_PART_MORPHOGENESIS	1.13056	2.57596e-07	0.000200373	DNM2,EGFR,RIMS1,SPTBN4,ROBO2,SOS1,TAOK3,NEDD4L,NEDD4,NFIB,NR2E1,CHRNA7,EPHA7,NCAM1,MINK1,PAK3,ROBO1,IRS2,PARD3,MYO16,ANK3,COBL,CDH4,ARMCX5-GPRASP2,WASF2,PDLIM5,CHL1,UNC5D,DAB1,DSCAM,EPHA5,ALCAM,NTNG1,NLGN1,PALLD,KANK1,KIF13B,GRIP1,CNTNAP2,ITGA4,LAMA3,RERE,ITSN2,SHANK1,ATP8A2,PIK3CA,DOCK10,DPYSL5,DSCAML1,ZSWIM5,SHTN1,SGK1,SYT1,SEMA6D,PREX2,SRCIN1,DTNBP1,MFSD2A,UNC5C,SEMA5A,NRXN3,NRXN1
3.AD/1.YC	GABA_neurons	Up	GO BP	GOBP_CELL_MORPHOGENESIS	GOBP_CELL_MORPHOGENESIS	0.969786	2.9788e-07	0.000202745	DNM2,EGFR,RIMS1,FLNA,WDR19,SPTBN4,ROBO2,SOS1,TAOK3,PROX1,NEDD4L,NEDD4,NFIB,NR2E1,CHRNA7,EPHA7,NCAM1,MINK1,PAK3,ROBO1,TEK,IRS2,PARD3,EPS8,MYO16,ANK3,COBL,CDH4,ARMCX5-GPRASP2,CDH8,WASF2,DLC1,CFDP1,PDLIM5,CHL1,UNC5D,FGD5,SH3D19,DAB1,DSCAM,EPHA5,ALCAM,NTNG1,NLGN1,PALLD,SIPA1L3,KANK1,KIF13B,GRIP1,TMEFF2,CNTNAP2,GREM1,CDH20,ITGA4,LAMA3,LIMS1,MYO7A,RERE,ITSN2,SHANK1,ATP8A2,PIK3CA,DOCK10,RADIL,DPYSL5,CDC…
3.AD/1.YC	GABA_neurons	Up	GO BP	GOBP_RECEPTOR_CLUSTERING	GOBP_RECEPTOR_CLUSTERING	2.81375	4.36947e-07	0.000264353	FLNA,SHISA6,WDR19,DLG2,GRIK2,LRRC7,NLGN1,ITGA4,NRXN1,GRIK5,NRXN2,GSN,LHFPL4
3.AD/1.YC	GABA_neurons	Up	GO BP	GOBP_CELL_PROJECTION_ORGANIZATION	GOBP_CELL_PROJECTION_ORGANIZATION	0.813954	5.06722e-07	0.00027591	CNR1,DNM2,EGFR,RIMS1,FLNA,TNC,MNS1,WDR19,SPTBN4,ROBO2,SOS1,CFAP43,QRICH2,TAOK3,NEDD4L,HMGB1,NEDD4,NFIB,NR2F1,NR2E1,CHRNA7,EPHA7,ALK,INSR,NCAM1,MINK1,PAK3,LRRC7,ROBO1,IRS2,AKAP9,DNAAF4,NINL,MAP4,HYDIN,CCDC88A,CENPJ,PARD3,JHY,CEP135,EPS8,MYO16,ANK3,CEP290,GNAO1,COBL,CDH4,ARMCX5-GPRASP2,WASF2,PDLIM5,CHL1,UNC5D,FGD5,DAB1,DSCAM,EPHA5,ALCAM,NTNG1,NLGN1,PALLD,KANK1,KIF13B,GRIP1,CNTNAP2,ITGA4,LAMA3,MYO7A…
3.AD/1.YC	GABA_neurons	Up	GO BP	GOBP_CELLULAR_COMPONENT_MORPHOGENESIS	GOBP_CELLULAR_COMPONENT_MORPHOGENESIS	1.01474	1.34981e-06	0.000668156	DNM2,EGFR,RIMS1,SPTBN4,ROBO2,SOS1,TAOK3,PROX1,NEDD4L,NEDD4,NFIB,NR2E1,CHRNA7,EPHA7,NCAM1,MINK1,PAK3,ROBO1,IRS2,PARD3,MYO16,ANK3,COBL,CDH4,ARMCX5-GPRASP2,WASF2,PDLIM5,CHL1,UNC5D,DAB1,DSCAM,EPHA5,ALCAM,NTNG1,NLGN1,PALLD,KANK1,KIF13B,GRIP1,CNTNAP2,ITGA4,LAMA3,RERE,ITSN2,SHANK1,ATP8A2,PIK3CA,DOCK10,DPYSL5,DSCAML1,ZSWIM5,SHTN1,SGK1,SYT1,SEMA6D,PREX2,SRCIN1,DTNBP1,MFSD2A,UNC5C,SEMA5A,NRXN3,NRXN1,NEB,NE…
3.AD/1.YC	GABA_neurons	Up	GO BP	GOBP_REGULATION_OF_MEMBRANE_POTENTIAL	GOBP_REGULATION_OF_MEMBRANE_POTENTIAL	1.23924	2.75811e-06	0.00115522	CNR1,RIMS1,FLNA,GABRB1,GLRA1,CELF4,CACNA1I,BCL2L1,WWP2,NEDD4L,NEDD4,CHRNA7,ADRA1A,GRIK2,AKAP9,ANK3,BNIP3L,NLGN1,SHANK1,NRXN1,GLRA2,GRIK5,KCNMB2,BIN1,KCND3,KCNJ3,KCNN2,NTSR1,PKP2,CAMK2D,ZMYND8,GRID2,GRIN2D,FGF14,CACNG2,CACNG4,GRIA1,KCNQ3,CACNA1B,GABRA6,GABRG1,GRIK4
3.AD/1.YC	GABA_neurons	Up	GO BP	GOBP_REGULATION_OF_POSTSYNAPTIC_MEMBRANE_POTENTIAL	GOBP_REGULATION_OF_POSTSYNAPTIC_MEMBRANE_POTENTIAL	1.88183	3.47944e-06	0.00130511	RIMS1,GABRB1,GLRA1,CELF4,CHRNA7,GRIK2,NLGN1,SHANK1,NRXN1,GLRA2,GRIK5,NTSR1,ZMYND8,GRID2,GRIN2D,FGF14,GRIA1,GABRA6,GABRG1,GRIK4
3.AD/1.YC	GABA_neurons	Up	GO BP	GOBP_CELL_MORPHOGENESIS_INVOLVED_IN_NEURON_DIFFERENTIATION	GOBP_CELL_MORPHOGENESIS_INVOLVED_IN_NEURON_DIFFERENTIATION	1.08985	3.78891e-06	0.00130511	DNM2,SPTBN4,ROBO2,SOS1,NEDD4L,NEDD4,NFIB,NR2E1,CHRNA7,EPHA7,NCAM1,MINK1,PAK3,ROBO1,IRS2,PARD3,ANK3,COBL,CDH4,ARMCX5-GPRASP2,PDLIM5,CHL1,UNC5D,DAB1,DSCAM,EPHA5,ALCAM,NTNG1,NLGN1,PALLD,KIF13B,ITGA4,LAMA3,MYO7A,RERE,SHANK1,ATP8A2,PIK3CA,DOCK10,DPYSL5,DSCAML1,ZSWIM5,SHTN1,SEMA6D,PREX2,SRCIN1,DTNBP1,MFSD2A,UNC5C,SEMA5A,NRXN3,NRXN1
3.AD/1.YC	GABA_neurons	Up	GO BP	GOBP_CELL_MORPHOGENESIS_INVOLVED_IN_DIFFERENTIATION	GOBP_CELL_MORPHOGENESIS_INVOLVED_IN_DIFFERENTIATION	0.996802	4.21375e-06	0.00134964	DNM2,FLNA,SPTBN4,ROBO2,SOS1,PROX1,NEDD4L,NEDD4,NFIB,NR2E1,CHRNA7,EPHA7,NCAM1,MINK1,PAK3,ROBO1,TEK,IRS2,PARD3,ANK3,COBL,CDH4,ARMCX5-GPRASP2,PDLIM5,CHL1,UNC5D,DAB1,DSCAM,EPHA5,ALCAM,NTNG1,NLGN1,PALLD,SIPA1L3,KANK1,KIF13B,TMEFF2,ITGA4,LAMA3,LIMS1,MYO7A,RERE,SHANK1,ATP8A2,PIK3CA,DOCK10,RADIL,DPYSL5,DSCAML1,ZSWIM5,SHTN1,SEMA6D,PREX2,SRCIN1,COL18A1,DTNBP1,MFSD2A,UNC5C,SEMA5A,NRXN3,NRXN1
3.AD/1.YC	GABA_neurons	Up	GO BP	GOBP_SYNAPTIC_SIGNALING	GOBP_SYNAPTIC_SIGNALING	1.00771	4.99168e-06	0.00150998	CNR1,SYT6,EGFR,RIMS1,GABRB1,GLRA1,SHISA6,CELF4,NR2E1,CHRNA7,ADRA1A,DLG2,GRIK2,MINK1,HRH4,RNF216,AKAP9,CDH8,NTNG1,NLGN1,SHANK1,SYT1,DTNBP1,NRXN1,GLRA2,TYROBP,NAAA,GRIK5,SYN2,DNAJC5,SYN3,NRXN2,NTSR1,CHRM5,DGKB,ZMYND8,CNTNAP4,GRID2,GRIN2D,RGS10,FGF14,OPRK1,CHRM3,CACNG2,CACNG4,SLC17A8,PLCB4,ERC1,GRIA1,KCNQ3,SHISA9,CACNA1B,JPH4,GABRA6,GABRG1,HCRTR2,GPR176,SORCS3,HTR1F,GRIK4
3.AD/1.YC	GABA_neurons	Up	GO BP	GOBP_REGULATION_OF_TRANSPORTER_ACTIVITY	GOBP_REGULATION_OF_TRANSPORTER_ACTIVITY	1.38336	1.24154e-05	0.00288106	DNM2,SHISA6,WWP2,NEDD4L,NEDD4,DLG2,MINK1,LRRC7,WNK2,AKAP9,ANK3,NLGN1,SHANK1,SGK1,NTSR1,CAMK2D,PLCG2,GSTM2,PDE4B,PDE4D,STIM1,FGF14,CHRM3,CACNG2,CACNG4,AHNAK,GRIA1,GRIA4,SHISA9,JPH4
3.AD/1.YC	GABA_neurons	Up	GO BP	GOBP_CATION_TRANSPORT	GOBP_CATION_TRANSPORT	0.800831	1.27204e-05	0.00288106	CNR1,SYT6,DNM2,FLNA,SHISA6,SPTBN4,CACNA1I,PTPRC,TCN2,TRPC4,WWP2,NEDD4L,NEDD4,CHRNA7,ADRA1A,DLG2,RASA3,MINK1,LRRC7,WNK2,AKAP9,MCU,ANK3,GNAO1,MT-ND5,NLGN1,SHANK1,SGK1,SYT1,DTNBP1,RYR1,SLC24A3,SLC22A3,KCNMB2,BIN1,KCND3,KCNJ3,KCNN2,NTSR1,PKP2,CAMK2D,PLCG2,GSTM2,CHRM5,MT-ND4,PDE4B,IL16,PDE4D,CDH23,CNTN1,STIM1,GRIN2D,NKAIN2,FGF14,NKAIN3,KCNG2,PKD1L1,KCNB2,CACNG2,CACNG4,KCNIP1,SLC17A8,SLC2A9,MT-ATP6,MT-…
3.AD/1.YC	GABA_neurons	Up	GO BP	GOBP_CARDIAC_MUSCLE_CELL_CONTRACTION	GOBP_CARDIAC_MUSCLE_CELL_CONTRACTION	2.29025	1.29314e-05	0.00288106	FLNA,NEDD4L,AKAP9,PIK3CA,BIN1,KCND3,KCNJ3,KCNN2,PKP2,CAMK2D,GSN,PDE4B,PDE4D
3.AD/1.YC	GABA_neurons	Up	GO BP	GOBP_REGULATION_OF_CATION_CHANNEL_ACTIVITY	GOBP_REGULATION_OF_CATION_CHANNEL_ACTIVITY	1.6368	1.3228e-05	0.00288106	SHISA6,DLG2,MINK1,LRRC7,ANK3,NLGN1,SHANK1,NTSR1,CAMK2D,PLCG2,GSTM2,PDE4B,PDE4D,STIM1,FGF14,CACNG2,CACNG4,AHNAK,GRIA1,GRIA4,SHISA9,JPH4
3.AD/1.YC	GABA_neurons	Up	GO BP	GOBP_TRANSMEMBRANE_TRANSPORT	GOBP_TRANSMEMBRANE_TRANSPORT	0.705888	1.54376e-05	0.00323299	DNM2,FLNA,GABRB1,GLRA1,SHISA6,CACNA1I,PTPRC,TCN2,TRPC4,WWP2,NEDD4L,NEDD4,CHRNA7,DLG2,RASA3,GRIK2,INSR,MINK1,LRRC7,WNK2,IRS2,AKAP9,MCU,ANK3,CLTCL1,MT-ND5,NLGN1,SHANK1,SGK1,MFSD2A,GLRA2,ANKH,RYR1,SLC24A3,SORT1,SLC22A3,GRIK5,KCNMB2,BIN1,KCND3,KCNJ3,KCNN2,NTSR1,CAMK2D,KLF15,PLCG2,GSTM2,STXBP4,MT-ND4,ATP11C,PDE4B,PDE4D,AZGP1,SLCO3A1,STIM1,GRID2,GRIN2D,FGF14,ABCC4,KCNG2,DISP1,PKD1L1,CHRM3,KCNB2,CACNG2,…
3.AD/1.YC	GABA_neurons	Up	GO BP	GOBP_INORGANIC_ION_TRANSMEMBRANE_TRANSPORT	GOBP_INORGANIC_ION_TRANSMEMBRANE_TRANSPORT	0.876857	2.07019e-05	0.00414305	DNM2,FLNA,GABRB1,GLRA1,CACNA1I,PTPRC,TCN2,TRPC4,WWP2,NEDD4L,NEDD4,CHRNA7,RASA3,WNK2,AKAP9,MCU,ANK3,MT-ND5,GLRA2,ANKH,RYR1,SLC24A3,KCNMB2,BIN1,KCND3,KCNJ3,KCNN2,NTSR1,CAMK2D,PLCG2,GSTM2,MT-ND4,PDE4B,PDE4D,STIM1,GRIN2D,FGF14,KCNG2,PKD1L1,KCNB2,CACNG2,CACNG4,KCNIP1,SLC2A9,MT-ATP6,MT-ATP8,MT-CO2,MT-CO3,MT-CYB,AHNAK,DPP6,MICU1,KCNT2,KCNN3,KCNQ3,KCNQ5,CACHD1,FAM155A,CACNA1B,JPH4,SLC25A30,ANO4,GABRA6,GA…
3.AD/1.YC	GABA_neurons	Up	GO BP	GOBP_CIRCULATORY_SYSTEM_PROCESS	GOBP_CIRCULATORY_SYSTEM_PROCESS	1.01238	2.13049e-05	0.00414305	CORIN,CNR1,EGFR,FLNA,PDE3A,MAP2K6,SPTBN4,NEDD4L,PPARA,ADRA1B,ADRA1A,ANGPT1,INSR,TEK,AKAP9,GNAO1,PIK3CA,SGK1,MFSD2A,FLI1,NPR3,RYR1,SLC24A3,SLC22A3,KCNMB2,BIN1,KCND3,KCNJ3,KCNN2,NTSR1,PKP2,CAMK2D,GSTM2,GSN,PDE4B,MYOF,PDE4D,SLCO3A1,STIM1,ABCC4,KCNG2,CHRM3,CACNG2,TBC1D8,SLC2A13,CACNG4,KCNIP1,SLC16A12,ABCC1,SLCO1C1,SGCD
3.AD/1.YC	GABA_neurons	Up	GO BP	GOBP_REGULATION_OF_CATION_TRANSMEMBRANE_TRANSPORT	GOBP_REGULATION_OF_CATION_TRANSMEMBRANE_TRANSPORT	1.2394	2.72746e-05	0.00491275	DNM2,FLNA,SHISA6,WWP2,NEDD4L,NEDD4,DLG2,MINK1,LRRC7,WNK2,AKAP9,ANK3,NLGN1,SHANK1,BIN1,KCNN2,NTSR1,CAMK2D,PLCG2,GSTM2,PDE4B,PDE4D,STIM1,FGF14,CACNG2,CACNG4,KCNIP1,AHNAK,DPP6,GRIA1,GRIA4,SHISA9,JPH4
3.AD/1.YC	GABA_neurons	Up	GO BP	GOBP_CATION_TRANSMEMBRANE_TRANSPORT	GOBP_CATION_TRANSMEMBRANE_TRANSPORT	0.852475	2.79697e-05	0.00491275	DNM2,FLNA,SHISA6,CACNA1I,PTPRC,TCN2,TRPC4,WWP2,NEDD4L,NEDD4,CHRNA7,DLG2,RASA3,MINK1,LRRC7,WNK2,AKAP9,MCU,ANK3,MT-ND5,NLGN1,SHANK1,RYR1,SLC24A3,KCNMB2,BIN1,KCND3,KCNJ3,KCNN2,NTSR1,CAMK2D,PLCG2,GSTM2,MT-ND4,PDE4B,PDE4D,STIM1,GRIN2D,FGF14,KCNG2,PKD1L1,KCNB2,CACNG2,CACNG4,KCNIP1,SLC2A9,MT-ATP6,MT-ATP8,MT-CO2,MT-CO3,MT-CYB,AHNAK,DPP6,MICU1,SLC25A48,GRIA1,GRIA4,KCNT2,KCNN3,KCNQ3,KCNQ5,CACHD1,FAM155A,SH…
3.AD/1.YC	GABA_neurons	Up	GO BP	GOBP_REGULATION_OF_SIGNALING_RECEPTOR_ACTIVITY	GOBP_REGULATION_OF_SIGNALING_RECEPTOR_ACTIVITY	1.52468	3.81974e-05	0.00649952	SHISA6,CBL,CHMP6,HDAC1,PPARA,DLG2,MINK1,LRRC7,AKAP9,BICD1,NLGN1,GREM1,SHANK1,PDE4D,SNX6,CACNG2,CACNG4,GRIA1,GRIA4,SHISA9,MTRNR2L12,LYPD6
3.AD/1.YC	GABA_neurons	Up	GO BP	GOBP_REGULATION_OF_TRANSMEMBRANE_TRANSPORT	GOBP_REGULATION_OF_TRANSMEMBRANE_TRANSPORT	1.00037	4.31972e-05	0.00685031	DNM2,FLNA,SHISA6,CACNA1I,WWP2,NEDD4L,NEDD4,DLG2,INSR,MINK1,LRRC7,WNK2,IRS2,AKAP9,ANK3,CLTCL1,NLGN1,SHANK1,BIN1,KCND3,KCNJ3,KCNN2,NTSR1,CAMK2D,KLF15,PLCG2,GSTM2,STXBP4,PDE4B,PDE4D,STIM1,FGF14,KCNG2,CHRM3,KCNB2,CACNG2,CACNG4,KCNIP1,AHNAK,DPP6,GRIA1,GRIA4,KCNQ3,KCNQ5,SHISA9,CACNA1B,JPH4
3.AD/1.YC	GABA_neurons	Up	GO BP	GOBP_ACTIN_FILAMENT_BASED_MOVEMENT	GOBP_ACTIN_FILAMENT_BASED_MOVEMENT	1.65027	4.36771e-05	0.00685031	FLNA,NEDD4L,AKAP9,WASF2,MYO7A,PIK3CA,SHTN1,BIN1,KCND3,KCNJ3,KCNN2,PKP2,CAMK2D,GSN,PDE4B,PDE4D,NEB,FNBP1L,MYO9B
3.AD/1.YC	GABA_neurons	Up	GO BP	GOBP_MULTICELLULAR_ORGANISMAL_SIGNALING	GOBP_MULTICELLULAR_ORGANISMAL_SIGNALING	1.4699	4.40332e-05	0.00685031	CORIN,FLNA,GLRA1,SPTBN4,CACNA1I,GRIK2,AKAP9,ANK3,CNTNAP2,RYR1,KCNMB2,BIN1,KCND3,KCNJ3,KCNN2,PKP2,CAMK2D,CHRM5,PDE4D,STIM1,CACNG2,CACNG4,KCNIP1
3.AD/1.YC	GABA_neurons	Up	GO BP	GOBP_SYNAPTIC_TRANSMISSION_GLUTAMATERGIC	GOBP_SYNAPTIC_TRANSMISSION_GLUTAMATERGIC	1.97607	5.08338e-05	0.00768862	CNR1,EGFR,GRIK2,CDH8,NLGN1,SHANK1,SYT1,NRXN1,GRIK5,GRID2,CACNG2,CACNG4,SLC17A8,GRIK4
3.AD/1.YC	GABA_neurons	Up	GO BP	GOBP_BIOLOGICAL_ADHESION	GOBP_BIOLOGICAL_ADHESION	0.68099	5.59495e-05	0.00823365	DNM2,EGFR,FLNA,CADM1,TNC,LGALS9,ROBO2,STAT5B,PTPRC,ZBTB1,HMGB1,ZFHX3,PPARA,SOX13,DLG2,EPHA7,PTPN22,GCNT2,ANGPT1,ITPKB,NCAM1,MINK1,PAK3,LRRC7,ROBO1,TEK,CD74,PARD3,CDKN2A,AATF,ANK3,SYMPK,CDH4,CDH8,DLC1,CFDP1,PDLIM5,CHL1,UNC5D,DAB1,DSCAM,ALCAM,NTNG1,NLGN1,PALLD,KANK1,TMEFF2,CNTNAP2,GREM1,CDH20,ITGA4,LAMA3,LIMS1,PIK3CA,RADIL,DSCAML1,SRCIN1,COL18A1,SEMA5A,NRXN3,NRXN1,FAT4,NRXN2,PKP2,FREM2,NID1,DCHS2,M…
3.AD/1.YC	GABA_neurons	Up	GO BP	GOBP_ACTIN_FILAMENT_BASED_PROCESS	GOBP_ACTIN_FILAMENT_BASED_PROCESS	0.863103	6.26641e-05	0.0089791	FLNA,ARRB1,SPTBN4,PROX1,NEDD4L,MINK1,PAK3,TEK,AKAP9,CCDC88A,MCU,EPS8,COBL,WASF2,DLC1,PDLIM5,FGD5,EPHA5,PALLD,KANK1,TMEFF2,MYO7A,SHANK1,PIK3CA,SHTN1,DTNBP1,SEMA5A,ARHGAP18,SVIL,PLS3,TYROBP,BIN1,KCND3,KCNJ3,KCNN2,PKP2,CAMK2D,MTSS1,STARD13,GSN,IQGAP2,PDE4B,PDE4D,PPM1E,THSD7A,ARHGAP6,FARP2,NEB,ARHGEF11,LIMA1,SSH2,HIP1,FNBP1L,NEBL,EPB41L1,FLNB,SPECC1L,TTC17,THSD7B,MYO9B
3.AD/1.YC	GABA_neurons	Up	GO BP	GOBP_HEAD_DEVELOPMENT	GOBP_HEAD_DEVELOPMENT	0.864097	7.15203e-05	0.0097357	BPTF,FLNA,CHD5,ROBO2,SALL1,SOS1,CFAP43,KDM2B,PROX1,DLX1,HDAC1,DNAJB1,ZFHX3,NFIB,NR2E1,MCPH1,BAG3,EPHA7,ERBB4,ALK,ROBO1,IRS2,HYDIN,JHY,BMERB1,MYO16,CEP290,KDM6B,GNAO1,DLC1,DAB1,EPHA5,CNTNAP2,RERE,SHANK1,DSCAML1,SYT1,SEMA6D,MFSD2A,UNC5C,SEMA5A,TULP3,TYROBP,FAT4,EMX2,PADI2,MT-ND4,MDGA1,CNTN1,GRID2,GRIN2D,AK4,GNG12,PBX3,SLC17A8,AFF2,ZIC1,PBX4
3.AD/1.YC	GABA_neurons	Up	GO BP	GOBP_RELAXATION_OF_CARDIAC_MUSCLE	GOBP_RELAXATION_OF_CARDIAC_MUSCLE	3.51344	7.33932e-05	0.00974697	PIK3CA,CAMK2D,GSTM2,GSN,PDE4B,PDE4D
3.AD/1.YC	GABA_neurons	Up	GO BP	GOBP_REGULATION_OF_NEUROTRANSMITTER_RECEPTOR_ACTIVITY	GOBP_REGULATION_OF_NEUROTRANSMITTER_RECEPTOR_ACTIVITY	2.00918	7.56336e-05	0.00980536	SHISA6,DLG2,MINK1,LRRC7,AKAP9,NLGN1,SHANK1,CACNG2,CACNG4,GRIA1,GRIA4,SHISA9,LYPD6
3.AD/1.YC	GABA_neurons	Up	GO BP	GOBP_ADULT_BEHAVIOR	GOBP_ADULT_BEHAVIOR	1.74076	8.73738e-05	0.011064	GLRA1,SPTBN4,HIPK2,PPARA,ALK,RNF180,DAB1,CNTNAP2,SHANK1,PREX2,NRXN3,NRXN1,NRXN2,NTSR1,GRIN2D,SDK1
3.AD/1.YC	GABA_neurons	Up	GO BP	GOBP_SYNAPSE_ORGANIZATION	GOBP_SYNAPSE_ORGANIZATION	1.08567	9.66268e-05	0.0117437	FLNA,TNC,SHISA6,ROBO2,NEDD4,CHRNA7,EPHA7,ERBB4,INSR,PAK3,ANK3,ARMCX5-GPRASP2,CDH8,WASF2,PDLIM5,DSCAM,NTNG1,NLGN1,SHANK1,DOCK10,SRCIN1,NRXN1,NRXN2,SDK2,MDGA1,DGKB,ZMYND8,LHFPL4,GRID2,CACNG2,SDK1,ERC1,ELFN1,CAST,LINGO2,ZC4H2,PDZRN3
3.AD/1.YC	GABA_neurons	Up	GO BP	GOBP_ACTION_POTENTIAL	GOBP_ACTION_POTENTIAL	1.6543	0.000103332	0.0119711	CNR1,FLNA,GLRA1,CACNA1I,NEDD4L,ADRA1A,GRIK2,AKAP9,ANK3,KCNMB2,BIN1,KCND3,KCNJ3,KCNN2,NTSR1,PKP2,CAMK2D
3.AD/1.YC	GABA_neurons	Up	GO BP	GOBP_CARDIAC_MUSCLE_CONTRACTION	GOBP_CARDIAC_MUSCLE_CONTRACTION	1.6543	0.000103332	0.0119711	FLNA,MAP2K6,NEDD4L,ADRA1B,ADRA1A,AKAP9,PIK3CA,BIN1,KCND3,KCNJ3,KCNN2,PKP2,CAMK2D,GSTM2,GSN,PDE4B,PDE4D
3.AD/1.YC	GABA_neurons	Up	GO BP	GOBP_SMALL_GTPASE_MEDIATED_SIGNAL_TRANSDUCTION	GOBP_SMALL_GTPASE_MEDIATED_SIGNAL_TRANSDUCTION	0.983439	0.000120467	0.0133866	DNM2,ARRB1,SOS1,CBL,ADRA1A,RASA3,ITPKB,ROBO1,IRS2,CCDC88A,CDKN2A,EPS8,WASF2,DLC1,DAB1,SIPA1L3,KANK1,DOCK10,CDC42SE2,SHTN1,ARHGAP18,RRAS2,PRKD1,STARD13,DOCK8,ERBIN,RAB39A,MMD2,ARHGAP6,FARP2,ARHGEF11,SGSM3,MCF2L,CCDC125,DOCK9,RASGEF1C,ARHGAP5,LRRD1,MYO9B,ARHGAP31,ARHGAP23,RERG
3.AD/1.YC	GABA_neurons	Up	GO BP	GOBP_REGULATION_OF_AMPA_RECEPTOR_ACTIVITY	GOBP_REGULATION_OF_AMPA_RECEPTOR_ACTIVITY	2.94858	0.000127615	0.0138973	SHISA6,MINK1,NLGN1,SHANK1,CACNG2,CACNG4,SHISA9
3.AD/1.YC	GABA_neurons	Up	GO BP	GOBP_REGULATION_OF_NERVOUS_SYSTEM_PROCESS	GOBP_REGULATION_OF_NERVOUS_SYSTEM_PROCESS	1.60419	0.000150204	0.015636	RIMS1,GLRA1,SHISA6,CELF4,CHRNA7,AKAP9,PARD3,NLGN1,SHANK1,NRXN1,NTSR1,TMEM98,ZMYND8,GRIN2D,CACNG4,SLC25A12,SHISA9
3.AD/1.YC	GABA_neurons	Up	GO BP	GOBP_CELL_CELL_SIGNALING	GOBP_CELL_CELL_SIGNALING	0.608957	0.000152196	0.015636	CNR1,SYT6,EGFR,RIMS1,FLNA,GABRB1,GLRA1,TNC,SHISA6,MAP2K6,CELF4,SALL1,TP63,TNKS,CDK14,HDAC1,WWOX,SMARCA4,NR2E1,SOX13,NR1H4,CHRNA7,ADRA1B,ADRA1A,DLG2,ANKRD6,GRIK2,MINK1,HRH4,WNK2,TEK,IRS2,RNF216,AKAP9,MCU,LATS2,GNAO1,CXXC4,CDH8,EPHA5,NTNG1,NLGN1,KANK1,GREM1,SHANK1,SYT1,DTNBP1,SEMA5A,NRXN1,GLRA2,TYROBP,WNT9A,TMEM64,NAAA,GRIK5,SYN2,DNAJC5,SYN3,NRXN2,KCNJ3,KCNN2,NTSR1,PKP2,KLF15,BICC1,PLCG2,STXBP4,CHR…
3.AD/1.YC	GABA_neurons	Up	GO BP	GOBP_IONOTROPIC_GLUTAMATE_RECEPTOR_SIGNALING_PATHWAY	GOBP_IONOTROPIC_GLUTAMATE_RECEPTOR_SIGNALING_PATHWAY	2.87427	0.000165507	0.0163852	GRIK2,GRIK5,GRID2,GRIN2D,GRIA1,GRIA4,GRIK4
3.AD/1.YC	GABA_neurons	Up	GO BP	GOBP_RAS_PROTEIN_SIGNAL_TRANSDUCTION	GOBP_RAS_PROTEIN_SIGNAL_TRANSDUCTION	1.1208	0.000182047	0.0177008	DNM2,ARRB1,SOS1,CBL,ADRA1A,RASA3,ITPKB,ROBO1,IRS2,CDKN2A,EPS8,WASF2,DLC1,KANK1,CDC42SE2,SHTN1,RRAS2,PRKD1,STARD13,ERBIN,RAB39A,MMD2,ARHGAP6,FARP2,ARHGEF11,SGSM3,CCDC125,ARHGAP5,LRRD1,MYO9B,RERG
3.AD/1.YC	GABA_neurons	Up	GO BP	GOBP_REGULATION_OF_SYSTEM_PROCESS	GOBP_REGULATION_OF_SYSTEM_PROCESS	0.920746	0.000196584	0.018779	CORIN,EGFR,RIMS1,FLNA,GLRA1,SHISA6,CELF4,SPTBN4,PPARA,GTF2IRD1,CHRNA7,ADRA1B,ADRA1A,AKAP9,PARD3,GNAO1,NLGN1,SHANK1,SGK1,NRXN1,RYR1,KCNMB2,BIN1,KCND3,KCNJ3,KCNN2,NTSR1,PKP2,CAMK2D,GSTM2,TMEM98,PDE4B,PDE4D,ZMYND8,STIM1,GRIN2D,OPRK1,KCNG2,RAB8B,CHRM3,KCNB2,CACNG2,CACNG4,KCNIP1,SLC25A12,SHISA9
3.AD/1.YC	GABA_neurons	Up	GO BP	GOBP_NEURON_RECOGNITION	GOBP_NEURON_RECOGNITION	2.35144	0.000205817	0.019322	CNR1,ROBO2,ROBO1,DSCAM,PALLD,CNTNAP2,DSCAML1,SEMA5A,NCAM2
3.AD/1.YC	GABA_neurons	Up	GO BP	GOBP_DENDRITE_DEVELOPMENT	GOBP_DENDRITE_DEVELOPMENT	1.27533	0.000215524	0.0198903	NEDD4L,NEDD4,NR2E1,CHRNA7,ALK,MINK1,PAK3,COBL,ARMCX5-GPRASP2,PDLIM5,DAB1,DSCAM,NLGN1,GRIP1,RERE,SHANK1,DOCK10,PREX2,SRCIN1,DTNBP1,MFSD2A,PAK4,ZMYND8,SDK1
3.AD/1.YC	GABA_neurons	Up	GO BP	GOBP_PROTEIN_LOCALIZATION_TO_SYNAPSE	GOBP_PROTEIN_LOCALIZATION_TO_SYNAPSE	1.91305	0.000242296	0.0219883	SHISA6,DLG2,LRRC7,NLGN1,GRIP1,SHANK1,NRXN1,TYROBP,NRXN2,CACNG2,CACNG4,GRIP2
3.AD/1.YC	GABA_neurons	Up	GO BP	GOBP_HEART_PROCESS	GOBP_HEART_PROCESS	1.17846	0.000253746	0.0226499	CORIN,FLNA,MAP2K6,SPTBN4,NEDD4L,ADRA1B,ADRA1A,AKAP9,GNAO1,PIK3CA,RYR1,BIN1,KCND3,KCNJ3,KCNN2,PKP2,CAMK2D,GSTM2,GSN,PDE4B,PDE4D,STIM1,KCNG2,CACNG2,CACNG4,KCNIP1,SGCD
3.AD/1.YC	GABA_neurons	Up	GO BP	GOBP_CHEMICAL_SYNAPTIC_TRANSMISSION_POSTSYNAPTIC	GOBP_CHEMICAL_SYNAPTIC_TRANSMISSION_POSTSYNAPTIC	1.7116	0.000280714	0.024653	RIMS1,GLRA1,CELF4,CHRNA7,GRIK2,NLGN1,SHANK1,NRXN1,GLRA2,GRIK5,NTSR1,ZMYND8,GRID2,GRIN2D
3.AD/1.YC	GABA_neurons	Up	GO BP	GOBP_ACTIN_MEDIATED_CELL_CONTRACTION	GOBP_ACTIN_MEDIATED_CELL_CONTRACTION	1.63141	0.000296774	0.0256497	FLNA,NEDD4L,AKAP9,PIK3CA,SHTN1,BIN1,KCND3,KCNJ3,KCNN2,PKP2,CAMK2D,GSN,PDE4B,PDE4D,NEB
3.AD/1.YC	GABA_neurons	Up	GO BP	GOBP_STRIATED_MUSCLE_CONTRACTION	GOBP_STRIATED_MUSCLE_CONTRACTION	1.39073	0.000355	0.0302028	FLNA,MAP2K6,NEDD4L,ADRA1B,ADRA1A,AKAP9,ATP8A2,PIK3CA,BIN1,KCND3,KCNJ3,KCNN2,PKP2,CAMK2D,GSTM2,GSN,PDE4B,PDE4D,ARHGEF11
3.AD/1.YC	GABA_neurons	Up	GO BP	GOBP_POSTSYNAPSE_ORGANIZATION	GOBP_POSTSYNAPSE_ORGANIZATION	1.4296	0.000372968	0.0312432	SHISA6,CHRNA7,EPHA7,INSR,PAK3,ARMCX5-GPRASP2,WASF2,PDLIM5,NLGN1,SHANK1,DOCK10,SRCIN1,NRXN1,NRXN2,DGKB,ZMYND8,LHFPL4,GRID2
3.AD/1.YC	GABA_neurons	Up	GO BP	GOBP_REGULATION_OF_TRANS_SYNAPTIC_SIGNALING	GOBP_REGULATION_OF_TRANS_SYNAPTIC_SIGNALING	1.01742	0.000386095	0.0318113	CNR1,EGFR,RIMS1,SHISA6,CELF4,NR2E1,CHRNA7,ADRA1A,GRIK2,AKAP9,NTNG1,NLGN1,SHANK1,SYT1,DTNBP1,NRXN1,TYROBP,GRIK5,SYN3,DGKB,ZMYND8,CNTNAP4,GRID2,GRIN2D,FGF14,CACNG2,CACNG4,PLCB4,ERC1,GRIA1,SHISA9,CACNA1B,JPH4,SORCS3,GRIK4
3.AD/1.YC	GABA_neurons	Up	GO BP	GOBP_POSITIVE_REGULATION_OF_RECEPTOR_MEDIATED_ENDOCYTOSIS	GOBP_POSITIVE_REGULATION_OF_RECEPTOR_MEDIATED_ENDOCYTOSIS	2.20312	0.000397276	0.0318113	DNM2,ARRB1,CBL,ANGPT1,INSR,BICD1,GREM1,PLCG2,HIP1
3.AD/1.YC	GABA_neurons	Up	GO BP	GOBP_STEROID_HORMONE_MEDIATED_SIGNALING_PATHWAY	GOBP_STEROID_HORMONE_MEDIATED_SIGNALING_PATHWAY	1.5148	0.00042815	0.033304	KDM3A,TP63,SAFB2,HDAC1,NEDD4,ZBTB7A,PPARA,RXRA,SMARCA4,NR2E1,DNAAF4,PRMT2,PADI2,PMEPA1,TRERF1,NR3C2
3.AD/1.YC	GABA_neurons	Up	GO BP	GOBP_AXON_DEVELOPMENT	GOBP_AXON_DEVELOPMENT	0.920735	0.000457577	0.0350917	CNR1,DNM2,FLNA,TNC,SPTBN4,ROBO2,SOS1,NFIB,NR2E1,EPHA7,NCAM1,PAK3,ROBO1,IRS2,PARD3,ANK3,COBL,CDH4,CHL1,UNC5D,DAB1,DSCAM,EPHA5,ALCAM,NTNG1,PALLD,KIF13B,ITGA4,LAMA3,ATP8A2,PIK3CA,DPYSL5,DSCAML1,ZSWIM5,SHTN1,SEMA6D,UNC5C,SEMA5A,NRXN3,NRXN1,NCAM2
3.AD/1.YC	GABA_neurons	Up	GO BP	GOBP_CENTRAL_NERVOUS_SYSTEM_DEVELOPMENT	GOBP_CENTRAL_NERVOUS_SYSTEM_DEVELOPMENT	0.69868	0.000469219	0.0352792	EGFR,BPTF,FLNA,GABRB1,CHD5,NPAS1,SPTBN4,ROBO2,SALL1,SOS1,CFAP43,KDM2B,TRPC4,PROX1,DLX1,HDAC1,DNAJB1,ZFHX3,NFIB,NR2E1,MCPH1,BAG3,SOX13,EPHA7,ERBB4,ALK,ROBO1,IRS2,HYDIN,JHY,BMERB1,MYO16,CEP290,KDM6B,GNAO1,DLC1,DAB1,EPHA5,CNTNAP2,RERE,SHANK1,DSCAML1,SYT1,SEMA6D,MFSD2A,UNC5C,SEMA5A,TULP3,TYROBP,FAT4,BIN1,EMX2,PADI2,MT-ND4,MDGA1,GSN,TMEM98,CNTN1,GRID2,GRIN2D,AK4,GNG12,PBX3,SLC17A8,AFF2,ZIC1,ZC4H2,PBX4
3.AD/1.YC	GABA_neurons	Up	GO BP	GOBP_BEHAVIOR	GOBP_BEHAVIOR	0.890857	0.00047298	0.0352792	CNR1,CNTFR,EGFR,MORC1,GLRA1,NPAS1,SPTBN4,HIPK2,ZFHX3,PPARA,NR2E1,CHRNA7,ALK,GRIK2,INSR,RNF180,GNAO1,ARMCX5-GPRASP2,DAB1,DSCAM,NLGN1,CNTNAP2,SHANK1,ATP8A2,SGK1,PREX2,MFSD2A,NRXN3,NRXN1,ANKH,NRXN2,NTSR1,CAMK4,CDH23,CNTNAP4,GRIN2D,OPRK1,SDK1,AFF2,GRIA1,HCRTR2,GPR176,SORCS3
3.AD/1.YC	GABA_neurons	Up	GO BP	GOBP_RECEPTOR_LOCALIZATION_TO_SYNAPSE	GOBP_RECEPTOR_LOCALIZATION_TO_SYNAPSE	2.13435	0.000537531	0.039192	SHISA6,DLG2,LRRC7,NLGN1,GRIP1,TYROBP,CACNG2,CACNG4,GRIP2
3.AD/1.YC	GABA_neurons	Up	GO BP	GOBP_REGULATION_OF_SODIUM_ION_TRANSPORT	GOBP_REGULATION_OF_SODIUM_ION_TRANSPORT	1.7692	0.000539835	0.039192	DNM2,SPTBN4,NEDD4L,NEDD4,WNK2,ANK3,PKP2,CAMK2D,CNTN1,NKAIN2,FGF14,NKAIN3
3.AD/1.YC	GABA_neurons	Up	GO BP	GOBP_PLASMA_MEMBRANE_ORGANIZATION	GOBP_PLASMA_MEMBRANE_ORGANIZATION	1.58803	0.000605228	0.0433614	DNM2,PTPRC,ANK3,TMEFF2,FAT4,BIN1,MTSS1,GSN,MYOF,SYTL4,ANO4,FNBP1L,PLSCR5,TLCD2
3.AD/1.YC	GABA_neurons	Up	GO BP	GOBP_DENDRITE_MORPHOGENESIS	GOBP_DENDRITE_MORPHOGENESIS	1.45447	0.000644362	0.0455656	NEDD4L,NEDD4,NR2E1,CHRNA7,MINK1,PAK3,ARMCX5-GPRASP2,PDLIM5,DSCAM,NLGN1,RERE,SHANK1,DOCK10,PREX2,SRCIN1,DTNBP1
3.AD/1.YC	GABA_neurons	Up	GO BP	GOBP_CALCIUM_ION_TRANSMEMBRANE_TRANSPORT	GOBP_CALCIUM_ION_TRANSMEMBRANE_TRANSPORT	1.08295	0.00067249	0.0466782	CACNA1I,PTPRC,TRPC4,CHRNA7,RASA3,MCU,RYR1,SLC24A3,BIN1,NTSR1,CAMK2D,PLCG2,GSTM2,PDE4B,PDE4D,STIM1,GRIN2D,FGF14,PKD1L1,CACNG2,CACNG4,AHNAK,MICU1,CACHD1,FAM155A,CACNA1B,JPH4
3.AD/1.YC	GABA_neurons	Up	GO BP	GOBP_NEURON_PROJECTION_GUIDANCE	GOBP_NEURON_PROJECTION_GUIDANCE	1.12778	0.000677241	0.0466782	SPTBN4,ROBO2,SOS1,NFIB,EPHA7,NCAM1,ROBO1,IRS2,CDH4,CHL1,UNC5D,DAB1,DSCAM,EPHA5,ALCAM,PALLD,LAMA3,PIK3CA,DPYSL5,DSCAML1,ZSWIM5,SEMA6D,UNC5C,SEMA5A,NRXN3,NRXN1
3.AD/1.YC	GABA_neurons	Up	GO BP	GOBP_CELL_SURFACE_RECEPTOR_SIGNALING_PATHWAY_INVOLVED_IN_CELL_CELL_SIGNALING	GOBP_CELL_SURFACE_RECEPTOR_SIGNALING_PATHWAY_INVOLVED_IN_CELL_CELL_SIGNALING	0.815364	0.000706647	0.0475024	EGFR,RIMS1,GLRA1,SHISA6,CELF4,SALL1,TNKS,CDK14,HDAC1,WWOX,SMARCA4,SOX13,CHRNA7,ANKRD6,GRIK2,WNK2,LATS2,GNAO1,CXXC4,NLGN1,KANK1,GREM1,SHANK1,SEMA5A,NRXN1,GLRA2,WNT9A,TMEM64,GRIK5,NTSR1,KLF15,BICC1,PLCG2,NXN,GNG2,NFATC1,GPRC5B,ZMYND8,GRID2,GRIN2D,RBMS3,GRK5,EDA,LYPD6,RNF220,TLE2
3.AD/1.YC	GABA_neurons	Up	GO BP	GOBP_CHROMATIN_REMODELING	GOBP_CHROMATIN_REMODELING	1.34373	0.000742758	0.0493209	BPTF,SCMH1,CHD5,TP63,CHD3,ZBTB1,HDAC1,ZBTB7A,SMARCA4,CDKN2A,SMARCD3,KDM6B,RERE,SMARCB1,MPHOSPH8,ARID1B,CENPP,KDM4B,KDM5C
3.AD/1.YC	GABA_neurons	Up	GO BP	GOBP_PALLIUM_DEVELOPMENT	GOBP_PALLIUM_DEVELOPMENT	1.37641	0.000772148	0.0506548	FLNA,PROX1,DLX1,HDAC1,NR2E1,MCPH1,ALK,ROBO1,BMERB1,KDM6B,DAB1,EPHA5,CNTNAP2,MFSD2A,FAT4,EMX2,GNG12
3.AD/1.YC	GABA_neurons	Up	GO BP	GOBP_NEURON_CELL_CELL_ADHESION	GOBP_NEURON_CELL_CELL_ADHESION	3.12269	0.000784082	0.0508253	NLGN1,NRXN3,NRXN1,NRXN2,NCAM2
3.AD/1.YC	GABA_neurons	Up	GO BP	GOBP_REGULATION_OF_MEMBRANE_LIPID_DISTRIBUTION	GOBP_REGULATION_OF_MEMBRANE_LIPID_DISTRIBUTION	2.03683	0.000821801	0.0526436	ATP8A2,MFSD2A,ATP11A,ATP11C,ATP8B4,ABCC1,ANO4,PLSCR5,TLCD2
3.AD/1.YC	GABA_neurons	Up	GO BP	GOBP_POSITIVE_REGULATION_OF_SYNAPTIC_TRANSMISSION	GOBP_POSITIVE_REGULATION_OF_SYNAPTIC_TRANSMISSION	1.408	0.000878886	0.0556457	CNR1,EGFR,RIMS1,NR2E1,CHRNA7,ADRA1A,GRIK2,NLGN1,SHANK1,SYT1,DTNBP1,NRXN1,TYROBP,GRIN2D,CACNG2,CACNG4
3.AD/1.YC	GABA_neurons	Up	GO BP	GOBP_TRANSMISSION_OF_NERVE_IMPULSE	GOBP_TRANSMISSION_OF_NERVE_IMPULSE	1.88035	0.000904759	0.0566254	GLRA1,SPTBN4,CACNA1I,GRIK2,ANK3,CNTNAP2,KCNMB2,CHRM5,CACNG2,CACNG4
3.AD/1.YC	GABA_neurons	Up	GO BP	GOBP_REGULATION_OF_SMALL_GTPASE_MEDIATED_SIGNAL_TRANSDUCTION	GOBP_REGULATION_OF_SMALL_GTPASE_MEDIATED_SIGNAL_TRANSDUCTION	1.03761	0.00095008	0.0586387	DNM2,ARRB1,SOS1,CBL,ADRA1A,RASA3,ITPKB,ROBO1,IRS2,EPS8,DLC1,SIPA1L3,KANK1,CDC42SE2,ARHGAP18,STARD13,ERBIN,MMD2,ARHGAP6,ARHGEF11,SGSM3,MCF2L,CCDC125,ARHGAP5,LRRD1,MYO9B,ARHGAP31,ARHGAP23
3.AD/1.YC	GABA_neurons	Up	GO BP	GOBP_INTRACELLULAR_RECEPTOR_SIGNALING_PATHWAY	GOBP_INTRACELLULAR_RECEPTOR_SIGNALING_PATHWAY	1.10459	0.0010086	0.0598731	NR6A1,KDM3A,MAP2K6,TP63,SAFB2,HDAC1,NEDD4,ZBTB7A,PPARA,RXRA,SMARCA4,NR2F1,NR2E1,ZNF536,NR1H4,PTPN22,DNAAF4,PRMT2,DHRS3,MN1,PADI2,ERBIN,PMEPA1,TRERF1,NR3C2
3.AD/1.YC	GABA_neurons	Up	GO BP	GOBP_POTASSIUM_ION_TRANSPORT	GOBP_POTASSIUM_ION_TRANSPORT	1.18829	0.00101368	0.0598731	DNM2,FLNA,WWP2,NEDD4L,NEDD4,WNK2,AKAP9,ANK3,SLC24A3,KCNMB2,BIN1,KCND3,KCNJ3,KCNN2,KCNG2,KCNB2,KCNIP1,DPP6,KCNT2,KCNN3,KCNQ3,KCNQ5
3.AD/1.YC	GABA_neurons	Up	GO BP	GOBP_CARDIAC_CONDUCTION	GOBP_CARDIAC_CONDUCTION	1.38511	0.00102108	0.0598731	CORIN,FLNA,SPTBN4,AKAP9,RYR1,BIN1,KCND3,KCNJ3,KCNN2,PKP2,CAMK2D,PDE4D,STIM1,CACNG2,CACNG4,KCNIP1
3.AD/1.YC	GABA_neurons	Up	GO BP	GOBP_REGULATION_OF_ION_TRANSPORT	GOBP_REGULATION_OF_ION_TRANSPORT	0.589973	0.00102263	0.0598731	CNR1,SYT6,DNM2,EGFR,FLNA,SHISA6,MAP2K6,SPTBN4,TP63,CACNA1I,TFDP2,WWP2,NEDD4L,NEDD4,PPARA,BAG3,NR1H4,DLG2,ANGPT1,INSR,MINK1,LRRC7,WNK2,IRS2,CD74,AKAP9,MCU,ANK3,CEP290,CLTCL1,GNAO1,IWS1,BNIP3L,EPHA5,NLGN1,SHANK1,ATP8A2,SYT1,DTNBP1,BIN1,KCND3,KCNJ3,KCNN2,NTSR1,PKP2,CAMK2D,KLF15,PLCG2,GSTM2,STXBP4,PDE4B,SYTL4,IL16,PDE4D,PPP1R13B,CNTN1,YJEFN3,STIM1,NKAIN2,FGF14,NKAIN3,KCNG2,RAB8B,FRMD4A,DISP1,RPH3AL,C…
3.AD/1.YC	GABA_neurons	Up	GO BP	GOBP_CELLULAR_RESPONSE_TO_STEROID_HORMONE_STIMULUS	GOBP_CELLULAR_RESPONSE_TO_STEROID_HORMONE_STIMULUS	1.22163	0.00104015	0.0602511	EGFR,KDM3A,TP63,SAFB2,HDAC1,NEDD4,ZBTB7A,PPARA,RXRA,SMARCA4,NR2E1,DNAAF4,PRMT2,SGK1,PADI2,PMEPA1,SMYD3,MT-ND3,TRERF1,NR3C2
3.AD/1.YC	GABA_neurons	Up	GO BP	GOBP_REGULATION_OF_CELL_PROJECTION_ORGANIZATION	GOBP_REGULATION_OF_CELL_PROJECTION_ORGANIZATION	0.783528	0.00112148	0.0636105	CNR1,DNM2,FLNA,MNS1,ROBO2,NEDD4L,NEDD4,NR2F1,NR2E1,EPHA7,ALK,PAK3,LRRC7,ROBO1,MAP4,CCDC88A,CEP135,EPS8,COBL,CDH4,ARMCX5-GPRASP2,WASF2,PDLIM5,DAB1,DSCAM,NTNG1,NLGN1,KANK1,KIF13B,GRIP1,ATP8A2,PIK3CA,SHTN1,SEMA6D,SRCIN1,MFSD2A,SEMA5A,IFT140,PRKD1,CNTN1,ZMYND8,GRID2,RAB8B,CDKL1,STYXL1,FNBP1L
3.AD/1.YC	GABA_neurons	Up	GO BP	GOBP_OLFACTORY_BULB_INTERNEURON_DIFFERENTIATION	GOBP_OLFACTORY_BULB_INTERNEURON_DIFFERENTIATION	3.57663	0.00112151	0.0636105	ROBO2,SALL1,ERBB4,ROBO1
3.AD/1.YC	GABA_neurons	Up	GO BP	GOBP_TELENCEPHALON_DEVELOPMENT	GOBP_TELENCEPHALON_DEVELOPMENT	1.15989	0.00116449	0.0643973	FLNA,ROBO2,SALL1,KDM2B,PROX1,DLX1,HDAC1,NFIB,NR2E1,MCPH1,ERBB4,ALK,ROBO1,BMERB1,KDM6B,DAB1,EPHA5,CNTNAP2,MFSD2A,FAT4,EMX2,GNG12
3.AD/1.YC	GABA_neurons	Up	GO BP	GOBP_CELLULAR_RESPONSE_TO_ORGANIC_CYCLIC_COMPOUND	GOBP_CELLULAR_RESPONSE_TO_ORGANIC_CYCLIC_COMPOUND	0.822088	0.00117086	0.0643973	DNM2,EGFR,FLNA,GABRB1,TNC,PDE3A,KDM3A,TP63,SAFB2,HDAC1,NEDD4,ZBTB7A,PPARA,RXRA,SMARCA4,NR2E1,NR1H4,ALK,PAK3,HRH4,AKAP9,DNAAF4,PRMT2,GNAO1,SGK1,DTNBP1,RYR1,MN1,PADI2,GSTM2,CHRM5,GNG2,PDE4B,PAK4,PMEPA1,SMYD3,CHRM3,MT-ND3,TRERF1,NR3C2,LARP1,HTR1F
3.AD/1.YC	GABA_neurons	Up	GO BP	GOBP_REGULATION_OF_POTASSIUM_ION_TRANSPORT	GOBP_REGULATION_OF_POTASSIUM_ION_TRANSPORT	1.62038	0.00120763	0.0657555	DNM2,FLNA,WWP2,NEDD4L,NEDD4,WNK2,AKAP9,ANK3,BIN1,KCNN2,KCNIP1,DPP6
3.AD/1.YC	GABA_neurons	Up	GO BP	GOBP_RESPONSE_TO_ENDOGENOUS_STIMULUS	GOBP_RESPONSE_TO_ENDOGENOUS_STIMULUS	0.53527	0.00123105	0.0663671	ADCY7,DNM2,EGFR,BPTF,FLNA,GABRB1,GLRA1,TNC,PDE3A,KDM3A,HTRA1,PTGFR,CATSPERG,ROBO2,SOS1,STAT5B,TP63,CBL,SAFB2,KLHL22,DLX1,HIPK2,HDAC1,HMGB1,ZFHX3,NEDD4,ZBTB7A,WWOX,PPARA,RXRA,SMARCA4,NR2E1,HDAC9,NR1H4,ADRA1A,KLB,ERBB4,ALK,PTPN22,GCNT2,INSR,IL17RD,HRH4,TEK,PDGFD,IRS2,AKAP9,DNAAF4,PARD3,LATS2,PRMT2,GNAO1,POLR2F,SNRPN,KANK1,GREM1,ITGA4,LIMS1,PIK3CA,SGK1,DTNBP1,GLRA2,CASTOR3,CASTOR2,LTBP3,CHST11,RYR1,…
3.AD/1.YC	GABA_neurons	Up	GO BP	GOBP_REGULATION_OF_RAS_PROTEIN_SIGNAL_TRANSDUCTION	GOBP_REGULATION_OF_RAS_PROTEIN_SIGNAL_TRANSDUCTION	1.23699	0.00126467	0.0675111	DNM2,ARRB1,CBL,ADRA1A,RASA3,ITPKB,ROBO1,IRS2,EPS8,DLC1,KANK1,CDC42SE2,STARD13,ERBIN,MMD2,SGSM3,CCDC125,LRRD1,MYO9B
3.AD/1.YC	GABA_neurons	Up	GO BP	GOBP_PROTEIN_LOCALIZATION_TO_CELL_JUNCTION	GOBP_PROTEIN_LOCALIZATION_TO_CELL_JUNCTION	1.52431	0.0013341	0.0705259	FLNA,SHISA6,DLG2,LRRC7,NLGN1,GRIP1,SHANK1,NRXN1,TYROBP,NRXN2,CACNG2,CACNG4,GRIP2
3.AD/1.YC	GABA_neurons	Up	GO BP	GOBP_POSITIVE_REGULATION_OF_CELL_PROJECTION_ORGANIZATION	GOBP_POSITIVE_REGULATION_OF_CELL_PROJECTION_ORGANIZATION	0.991815	0.00136435	0.0714315	CNR1,DNM2,FLNA,MNS1,ROBO2,ALK,PAK3,LRRC7,ROBO1,CCDC88A,CEP135,EPS8,COBL,CDH4,ARMCX5-GPRASP2,WASF2,DSCAM,NLGN1,GRIP1,ATP8A2,PIK3CA,SHTN1,SEMA5A,PRKD1,CNTN1,ZMYND8,RAB8B,STYXL1,FNBP1L
3.AD/1.YC	GABA_neurons	Up	GO BP	GOBP_REGULATION_OF_BLOOD_CIRCULATION	GOBP_REGULATION_OF_BLOOD_CIRCULATION	1.04619	0.0014176	0.0721387	CORIN,EGFR,FLNA,SPTBN4,ADRA1B,ADRA1A,AKAP9,GNAO1,RYR1,KCNMB2,BIN1,KCND3,KCNJ3,KCNN2,PKP2,CAMK2D,GSTM2,PDE4B,PDE4D,STIM1,KCNG2,CHRM3,CACNG2,CACNG4,KCNIP1
3.AD/1.YC	GABA_neurons	Up	GO BP	GOBP_CELL_JUNCTION_ORGANIZATION	GOBP_CELL_JUNCTION_ORGANIZATION	0.731146	0.00151699	0.0764814	FLNA,CADM1,TNC,SHISA6,ROBO2,NEDD4,NR1H4,CHRNA7,EPHA7,ERBB4,INSR,PAK3,TEK,PARD3,ANK3,CDH4,ARMCX5-GPRASP2,CDH8,WASF2,DLC1,PDLIM5,DSCAM,NTNG1,NLGN1,GREM1,CDH20,LAMA3,LIMS1,SHANK1,DOCK10,SRCIN1,NRXN1,NRXN2,PKP2,SDK2,MDGA1,DGKB,ZMYND8,LHFPL4,ARHGAP6,GRID2,RAB8B,CACNG2,SDK1,ERC1,ELFN1,CAST,LINGO2,ZC4H2,PDZRN3
3.AD/1.YC	GABA_neurons	Up	GO BP	GOBP_REGULATION_OF_HEART_CONTRACTION	GOBP_REGULATION_OF_HEART_CONTRACTION	1.11146	0.00155117	0.0774876	CORIN,FLNA,SPTBN4,ADRA1B,ADRA1A,AKAP9,GNAO1,RYR1,BIN1,KCND3,KCNJ3,KCNN2,PKP2,CAMK2D,GSTM2,PDE4B,PDE4D,STIM1,KCNG2,CACNG2,CACNG4,KCNIP1
3.AD/1.YC	GABA_neurons	Up	GO BP	GOBP_CARDIAC_MUSCLE_CELL_ACTION_POTENTIAL	GOBP_CARDIAC_MUSCLE_CELL_ACTION_POTENTIAL	1.75866	0.00159274	0.0788404	FLNA,NEDD4L,AKAP9,ANK3,BIN1,KCND3,KCNJ3,KCNN2,PKP2,CAMK2D
3.AD/1.YC	GABA_neurons	Up	GO BP	GOBP_LIPID_TRANSLOCATION	GOBP_LIPID_TRANSLOCATION	2.03145	0.00161036	0.0789947	ATP8A2,MFSD2A,ATP11A,ATP11C,ATP8B4,ABCC1,ANO4,PLSCR5
3.AD/1.YC	GABA_neurons	Up	GO BP	GOBP_VOCALIZATION_BEHAVIOR	GOBP_VOCALIZATION_BEHAVIOR	2.80053	0.00175198	0.0851743	CNTNAP2,SHANK1,NRXN3,NRXN1,NRXN2
3.AD/1.YC	GABA_neurons	Up	GO BP	GOBP_HIPPOCAMPUS_DEVELOPMENT	GOBP_HIPPOCAMPUS_DEVELOPMENT	1.73548	0.00177131	0.0853522	PROX1,DLX1,HDAC1,NR2E1,ALK,KDM6B,DAB1,EPHA5,MFSD2A,EMX2
3.AD/1.YC	GABA_neurons	Up	GO BP	GOBP_INTRACELLULAR_STEROID_HORMONE_RECEPTOR_SIGNALING_PATHWAY	GOBP_INTRACELLULAR_STEROID_HORMONE_RECEPTOR_SIGNALING_PATHWAY	1.44987	0.00201807	0.0955512	KDM3A,TP63,SAFB2,HDAC1,NEDD4,ZBTB7A,SMARCA4,DNAAF4,PRMT2,PADI2,PMEPA1,TRERF1,NR3C2
3.AD/1.YC	GABA_neurons	Up	GO BP	GOBP_ANDROGEN_RECEPTOR_SIGNALING_PATHWAY	GOBP_ANDROGEN_RECEPTOR_SIGNALING_PATHWAY	2.15071	0.00206851	0.0967416	KDM3A,SAFB2,HDAC1,ZBTB7A,SMARCA4,PRMT2,PMEPA1
3.AD/1.YC	GABA_neurons	Up	GO BP	GOBP_ADENYLATE_CYCLASE_MODULATING_G_PROTEIN_COUPLED_RECEPTOR_SIGNALING_PATHWAY	GOBP_ADENYLATE_CYCLASE_MODULATING_G_PROTEIN_COUPLED_RECEPTOR_SIGNALING_PATHWAY	1.10492	0.00209335	0.0967416	ADCY7,CNR1,FLNA,PTGFR,ADRA1B,ADRA1A,HRH4,GNAO1,WASF2,NPR3,CHRM5,GNG2,PDE4B,PDE4D,OPRK1,GPR161,CHRM3,GRK5,GPR176,HTR1F,RXFP1
3.AD/1.YC	GABA_neurons	Up	GO BP	GOBP_REGULATION_OF_ACTION_POTENTIAL	GOBP_REGULATION_OF_ACTION_POTENTIAL	1.96264	0.00209786	0.0967416	CNR1,FLNA,ADRA1A,AKAP9,BIN1,NTSR1,PKP2,CAMK2D
3.AD/1.YC	GABA_neurons	Up	GO BP	GOBP_POSITIVE_REGULATION_OF_SYNAPTIC_TRANSMISSION_GLUTAMATERGIC	GOBP_POSITIVE_REGULATION_OF_SYNAPTIC_TRANSMISSION_GLUTAMATERGIC	2.3866	0.00211428	0.0967416	EGFR,NLGN1,SHANK1,NRXN1,CACNG2,CACNG4
3.AD/1.YC	GABA_neurons	Up	GO BP	GOBP_POSTSYNAPTIC_SPECIALIZATION_ASSEMBLY	GOBP_POSTSYNAPTIC_SPECIALIZATION_ASSEMBLY	2.70704	0.00221357	0.100158	NLGN1,SHANK1,NRXN1,NRXN2,GRID2
3.AD/1.YC	GABA_neurons	Up	GO BP	GOBP_NETRIN_ACTIVATED_SIGNALING_PATHWAY	GOBP_NETRIN_ACTIVATED_SIGNALING_PATHWAY	3.21407	0.00225765	0.100158	UNC5D,DSCAM,SHTN1,UNC5C
3.AD/1.YC	GABA_neurons	Up	GO BP	GOBP_INHIBITORY_POSTSYNAPTIC_POTENTIAL	GOBP_INHIBITORY_POSTSYNAPTIC_POTENTIAL	3.21407	0.00225765	0.100158	RIMS1,GLRA1,GRIK2,NTSR1
3.AD/1.YC	GABA_neurons	Up	GO BP	GOBP_POSITIVE_REGULATION_OF_MOLECULAR_FUNCTION	GOBP_POSITIVE_REGULATION_OF_MOLECULAR_FUNCTION	0.495707	0.00226252	0.100158	ADCY7,DNM2,EGFR,LGALS9,ARRB1,MAP2K6,SOS1,PTPRC,TNKS,TAOK3,PROX1,CRADD,HIPK2,HDAC1,HMGB1,DNAJB1,ZBTB7A,SMARCA4,TCF3,HMBOX1,CHRNA7,ADRA1A,EPHA7,ERBB4,RASA3,ALK,ANGPT1,INSR,MAP3K1,MINK1,PAK3,ROBO1,WNK2,TEK,TRAF5,PDGFD,CD74,RASSF2,DCP1B,AKAP9,CCDC88A,ANK3,AGAP3,GNAO1,RFC3,DLC1,DAB1,EPHA5,SIPA1L3,GREM1,LIMS1,PIK3CA,DOCK10,SGK1,PREX2,SRCIN1,ARHGAP18,SMARCB1,NPR3,PRKD1,NTSR1,PLCG2,STARD13,GSTM2,GSN,DOCK…
3.AD/1.YC	GABA_neurons	Up	GO BP	GOBP_RELAXATION_OF_MUSCLE	GOBP_RELAXATION_OF_MUSCLE	2.32752	0.00252149	0.109836	PIK3CA,CAMK2D,GSTM2,GSN,PDE4B,PDE4D
3.AD/1.YC	GABA_neurons	Up	GO BP	GOBP_POSTSYNAPTIC_SPECIALIZATION_ORGANIZATION	GOBP_POSTSYNAPTIC_SPECIALIZATION_ORGANIZATION	2.32752	0.00252149	0.109836	NLGN1,SHANK1,NRXN1,NRXN2,ZMYND8,GRID2
3.AD/1.YC	GABA_neurons	Up	GO BP	GOBP_GLUTAMATE_RECEPTOR_SIGNALING_PATHWAY	GOBP_GLUTAMATE_RECEPTOR_SIGNALING_PATHWAY	1.89666	0.00269445	0.114619	GRIK2,NECAB2,GRIK5,GRID2,GRIN2D,GRIA1,GRIA4,GRIK4
3.AD/1.YC	GABA_neurons	Up	GO BP	GOBP_RESPONSE_TO_TRANSFORMING_GROWTH_FACTOR_BETA	GOBP_RESPONSE_TO_TRANSFORMING_GROWTH_FACTOR_BETA	1.05798	0.00287899	0.120698	DNM2,PDE3A,HTRA1,CBL,DLX1,HIPK2,ZFHX3,ZBTB7A,WWOX,PPARA,GCNT2,IL17RD,PDGFD,PARD3,LATS2,LIMS1,LTBP3,CHST11,TGFBR3,PMEPA1,SNX6,SMAD9
3.AD/1.YC	GABA_neurons	Up	GO BP	GOBP_REGULATION_OF_NEURON_PROJECTION_DEVELOPMENT	GOBP_REGULATION_OF_NEURON_PROJECTION_DEVELOPMENT	0.850293	0.00288169	0.120698	CNR1,FLNA,ROBO2,NEDD4L,NEDD4,NR2F1,NR2E1,EPHA7,ALK,PAK3,LRRC7,ROBO1,CCDC88A,COBL,CDH4,ARMCX5-GPRASP2,PDLIM5,DAB1,DSCAM,NTNG1,NLGN1,KANK1,KIF13B,ATP8A2,SHTN1,SEMA6D,SRCIN1,MFSD2A,SEMA5A,PRKD1,CNTN1,GRID2,STYXL1
3.AD/1.YC	GABA_neurons	Up	GO BP	GOBP_RHO_PROTEIN_SIGNAL_TRANSDUCTION	GOBP_RHO_PROTEIN_SIGNAL_TRANSDUCTION	1.31827	0.00297688	0.122796	ARRB1,ADRA1A,ROBO1,EPS8,DLC1,KANK1,CDC42SE2,SHTN1,STARD13,ARHGAP6,ARHGEF11,CCDC125,ARHGAP5,MYO9B
3.AD/1.YC	GABA_neurons	Up	GO BP	GOBP_REGULATION_OF_TRANSPORT	GOBP_REGULATION_OF_TRANSPORT	0.47944	0.00313948	0.126626	CORIN,CNR1,SYT6,DNM2,EGFR,RIMS1,FLNA,SHISA6,LGALS9,ARRB1,MAP2K6,SPTBN4,TP63,CBL,CACNA1I,PTPRC,TFDP2,WWP2,NEDD4L,HMGB1,NEDD4,PPARA,BAG3,NR1H4,ADRA1A,DLG2,ANGPT1,INSR,MINK1,NECAB2,LRRC7,WNK2,IRS2,CD74,AKAP9,BICD1,MCU,ANK3,CEP290,CLTCL1,GNAO1,IWS1,BNIP3L,EPHA5,NLGN1,GREM1,SHANK1,ATP8A2,SGK1,SYT1,DTNBP1,PRKD1,GRIK5,DNAJC5,BIN1,KCND3,KCNJ3,KCNN2,NTSR1,PKP2,CAMK2D,KLF15,PLCG2,GSTM2,STXBP4,RAB27A,CD22,P…
3.AD/1.YC	GABA_neurons	Up	GO BP	GOBP_MODULATION_OF_EXCITATORY_POSTSYNAPTIC_POTENTIAL	GOBP_MODULATION_OF_EXCITATORY_POSTSYNAPTIC_POTENTIAL	2.02497	0.00317435	0.127091	RIMS1,CELF4,CHRNA7,NLGN1,SHANK1,NRXN1,ZMYND8
3.AD/1.YC	GABA_neurons	Up	GO BP	GOBP_CELL_CELL_ADHESION	GOBP_CELL_CELL_ADHESION	0.625733	0.00328845	0.130698	EGFR,FLNA,CADM1,LGALS9,ROBO2,STAT5B,PTPRC,ZBTB1,HMGB1,PPARA,SOX13,DLG2,EPHA7,PTPN22,GCNT2,ITPKB,MINK1,PAK3,LRRC7,ROBO1,CD74,ANK3,CDH4,CDH8,PDLIM5,UNC5D,DAB1,DSCAM,ALCAM,NTNG1,NLGN1,PALLD,CDH20,ITGA4,LAMA3,LIMS1,PIK3CA,DSCAML1,NRXN3,NRXN1,FAT4,NRXN2,PKP2,DCHS2,SDK2,MDGA1,NEXMIF,DOCK8,HLA-DRA,NFKBIZ,CDH23,PAK4,GRID2,CD99,PKD1L1,SDK1,PCDHGA1,NCAM2
3.AD/1.YC	GABA_neurons	Up	GO BP	GOBP_PROTEIN_DEMETHYLATION	GOBP_PROTEIN_DEMETHYLATION	2.21642	0.00350899	0.136474	KDM3A,KDM2B,KDM6B,KDM2A,KDM4B,KDM5C
3.AD/1.YC	GABA_neurons	Up	GO BP	GOBP_EMBRYONIC_CAMERA_TYPE_EYE_DEVELOPMENT	GOBP_EMBRYONIC_CAMERA_TYPE_EYE_DEVELOPMENT	2.21642	0.00350899	0.136474	WDR19,KDM2B,PROX1,HIPK2,TULP3,IFT140
3.AD/1.YC	GABA_neurons	Up	GO BP	GOBP_REGULATION_OF_ACTIN_FILAMENT_BASED_PROCESS	GOBP_REGULATION_OF_ACTIN_FILAMENT_BASED_PROCESS	0.876007	0.00370336	0.143013	FLNA,SPTBN4,PROX1,PAK3,TEK,AKAP9,CCDC88A,EPS8,WASF2,DLC1,EPHA5,KANK1,TMEFF2,SHANK1,PIK3CA,SEMA5A,ARHGAP18,SVIL,BIN1,PKP2,CAMK2D,GSN,IQGAP2,PDE4B,PDE4D,PPM1E,ARHGAP6,NEB,LIMA1,SSH2
3.AD/1.YC	GABA_neurons	Up	GO BP	GOBP_REGULATION_OF_SYNAPTIC_TRANSMISSION_GLUTAMATERGIC	GOBP_REGULATION_OF_SYNAPTIC_TRANSMISSION_GLUTAMATERGIC	1.67657	0.00375312	0.143914	CNR1,EGFR,GRIK2,NLGN1,SHANK1,SYT1,NRXN1,CACNG2,CACNG4
3.AD/1.YC	GABA_neurons	Up	GO BP	GOBP_INOSITOL_LIPID_MEDIATED_SIGNALING	GOBP_INOSITOL_LIPID_MEDIATED_SIGNALING	1.14864	0.00409625	0.15489	EGFR,CBL,NEDD4,ERBB4,ANGPT1,INSR,TEK,PDGFD,IRS2,MYO16,PIK3CA,PREX2,NPR3,GSN,PLCB4,FBXL2,CA8,ADAP2
3.AD/1.YC	GABA_neurons	Up	GO BP	GOBP_REGULATION_OF_ESTABLISHMENT_OR_MAINTENANCE_OF_CELL_POLARITY	GOBP_REGULATION_OF_ESTABLISHMENT_OR_MAINTENANCE_OF_CELL_POLARITY	2.45913	0.00412576	0.154929	TEK,KANK1,SHTN1,GSN,DOCK8
3.AD/1.YC	GABA_neurons	Up	GO BP	GOBP_HORMONE_MEDIATED_SIGNALING_PATHWAY	GOBP_HORMONE_MEDIATED_SIGNALING_PATHWAY	1.12316	0.0044424	0.16387	KDM3A,TP63,SAFB2,HDAC1,NEDD4,ZBTB7A,PPARA,RXRA,SMARCA4,NR2E1,DNAAF4,LATS2,PRMT2,PADI2,PMEPA1,TRERF1,NR3C2,RXFP1
3.AD/1.YC	GABA_neurons	Up	GO BP	GOBP_ATP_SYNTHESIS_COUPLED_ELECTRON_TRANSPORT	GOBP_ATP_SYNTHESIS_COUPLED_ELECTRON_TRANSPORT	1.44084	0.00447774	0.16387	MT-ND5,MT-ND6,MT-ND4,SDHA,MT-CO2,MT-CO3,MT-CYB,MT-ND1,MT-ND2,MT-ND3,MT-ND4L
3.AD/1.YC	GABA_neurons	Up	GO BP	GOBP_NEGATIVE_REGULATION_OF_VASCULAR_ASSOCIATED_SMOOTH_MUSCLE_CELL_DIFFERENTIATION	GOBP_NEGATIVE_REGULATION_OF_VASCULAR_ASSOCIATED_SMOOTH_MUSCLE_CELL_DIFFERENTIATION	3.64506	0.00453439	0.16387	NFATC2,NFATC3,NFATC1
3.AD/1.YC	GABA_neurons	Up	GO BP	GOBP_NEURAL_RETINA_DEVELOPMENT	GOBP_NEURAL_RETINA_DEVELOPMENT	1.6283	0.00456747	0.16387	DLX1,HIPK2,SMARCA4,SMARCD3,DSCAM,ATP8A2,SDK2,SLC17A8,SDK1
3.AD/1.YC	GABA_neurons	Up	GO BP	GOBP_REGULATION_OF_RHO_PROTEIN_SIGNAL_TRANSDUCTION	GOBP_REGULATION_OF_RHO_PROTEIN_SIGNAL_TRANSDUCTION	1.52206	0.00460461	0.16387	ARRB1,ADRA1A,ROBO1,EPS8,DLC1,KANK1,CDC42SE2,STARD13,CCDC125,MYO9B
3.AD/1.YC	GABA_neurons	Up	GO BP	GOBP_SYNAPTIC_TRANSMISSION_GABAERGIC	GOBP_SYNAPTIC_TRANSMISSION_GABAERGIC	1.90907	0.00468276	0.164861	CNR1,ADRA1A,NLGN1,SYN3,CNTNAP4,GABRA6,GABRG1
3.AD/1.YC	GABA_neurons	Up	GO BP	GOBP_POSITIVE_REGULATION_OF_ENDOCYTOSIS	GOBP_POSITIVE_REGULATION_OF_ENDOCYTOSIS	1.42387	0.00484697	0.164861	DNM2,ARRB1,CBL,NEDD4L,ANGPT1,INSR,BICD1,NLGN1,GREM1,PLCG2,HIP1
3.AD/1.YC	GABA_neurons	Up	GO BP	GOBP_CELLULAR_RESPONSE_TO_NITROGEN_COMPOUND	GOBP_CELLULAR_RESPONSE_TO_NITROGEN_COMPOUND	0.659339	0.00485023	0.164861	ADCY7,DNM2,FLNA,GABRB1,GLRA1,PDE3A,SOS1,STAT5B,KLHL22,HDAC9,NR1H4,CHRNA7,ALK,PTPN22,INSR,HRH4,PDGFD,IRS2,AKAP9,GNAO1,KANK1,ITGA4,PIK3CA,DTNBP1,GLRA2,CASTOR3,CASTOR2,RYR1,KLF15,PIK3R3,GSTM2,STXBP4,CHRM5,GNG2,PDE4B,PRKAR2A,SNX6,RGS10,CPEB2,RAB8B,ARID1B,CHRM3,ABCC1,LARP1,PTPRE,GRIA1,HTR1F
3.AD/1.YC	GABA_neurons	Up	GO BP	GOBP_CALCIUM_ION_TRANSPORT	GOBP_CALCIUM_ION_TRANSPORT	0.830375	0.00492178	0.164861	CACNA1I,PTPRC,TRPC4,CHRNA7,ADRA1A,RASA3,MCU,GNAO1,RYR1,SLC24A3,BIN1,NTSR1,CAMK2D,PLCG2,GSTM2,PDE4B,IL16,PDE4D,CDH23,STIM1,GRIN2D,FGF14,PKD1L1,CACNG2,CACNG4,AHNAK,MICU1,CACHD1,FAM155A,CACNA1B,JPH4
3.AD/1.YC	GABA_neurons	Up	GO BP	GOBP_POSITIVE_REGULATION_OF_TRANSPORTER_ACTIVITY	GOBP_POSITIVE_REGULATION_OF_TRANSPORTER_ACTIVITY	1.34702	0.00492415	0.164861	DNM2,WNK2,AKAP9,ANK3,SGK1,NTSR1,PLCG2,GSTM2,STIM1,FGF14,CACNG2,CACNG4
3.AD/1.YC	GABA_neurons	Up	GO BP	GOBP_POSITIVE_REGULATION_OF_RECEPTOR_INTERNALIZATION	GOBP_POSITIVE_REGULATION_OF_RECEPTOR_INTERNALIZATION	2.38506	0.00496552	0.164861	ARRB1,ANGPT1,INSR,GREM1,PLCG2
3.AD/1.YC	GABA_neurons	Up	GO BP	GOBP_RETINA_LAYER_FORMATION	GOBP_RETINA_LAYER_FORMATION	2.38506	0.00496552	0.164861	HIPK2,DSCAM,ATP8A2,SDK2,SDK1
3.AD/1.YC	GABA_neurons	Up	GO BP	GOBP_REGULATION_OF_ANDROGEN_RECEPTOR_SIGNALING_PATHWAY	GOBP_REGULATION_OF_ANDROGEN_RECEPTOR_SIGNALING_PATHWAY	2.38506	0.00496552	0.164861	SAFB2,HDAC1,ZBTB7A,SMARCA4,PRMT2
3.AD/1.YC	GABA_neurons	Up	GO BP	GOBP_SENSORY_SYSTEM_DEVELOPMENT	GOBP_SENSORY_SYSTEM_DEVELOPMENT	0.855295	0.00505045	0.166665	CELF4,WDR19,SOS1,KDM2B,PROX1,DLX1,HIPK2,HDAC1,HMGB1,MAF,SMARCA4,NR2E1,SMARCD3,CEP290,DSCAM,SIPA1L3,MYO7A,ATP8A2,MFSD2A,TULP3,WNT9A,IFT140,FREM2,SDK2,NHS,PBX3,SLC17A8,SDK1,PBX4
3.AD/1.YC	GABA_neurons	Up	GO BP	GOBP_HISTONE_H4_K5_ACETYLATION	GOBP_HISTONE_H4_K5_ACETYLATION	2.79889	0.00514893	0.16688	KANSL1L,KANSL1,PHF20,JADE3
3.AD/1.YC	GABA_neurons	Up	GO BP	GOBP_NEGATIVE_REGULATION_OF_LIPASE_ACTIVITY	GOBP_NEGATIVE_REGULATION_OF_LIPASE_ACTIVITY	2.79889	0.00514893	0.16688	HDAC9,BICD1,SORT1,APOC1
3.AD/1.YC	GABA_neurons	Up	GO BP	GOBP_REGULATION_OF_POSTSYNAPTIC_NEUROTRANSMITTER_RECEPTOR_ACTIVITY	GOBP_REGULATION_OF_POSTSYNAPTIC_NEUROTRANSMITTER_RECEPTOR_ACTIVITY	2.79889	0.00514893	0.16688	SHISA6,AKAP9,CACNG4,SHISA9
3.AD/1.YC	GABA_neurons	Up	GO BP	GOBP_LIMBIC_SYSTEM_DEVELOPMENT	GOBP_LIMBIC_SYSTEM_DEVELOPMENT	1.40716	0.00523991	0.168824	PROX1,DLX1,HDAC1,NR2E1,ALK,KDM6B,DAB1,EPHA5,CNTNAP2,MFSD2A,EMX2
3.AD/1.YC	GABA_neurons	Up	GO BP	GOBP_NEUROMUSCULAR_JUNCTION_DEVELOPMENT	GOBP_NEUROMUSCULAR_JUNCTION_DEVELOPMENT	1.87254	0.00528924	0.168966	TNC,NEDD4,ANK3,SHANK1,CACNG2,ZC4H2,PDZRN3
3.AD/1.YC	GABA_neurons	Up	GO BP	GOBP_POSITIVE_REGULATION_OF_GTPASE_ACTIVITY	GOBP_POSITIVE_REGULATION_OF_GTPASE_ACTIVITY	0.810489	0.00530636	0.168966	ARRB1,SOS1,RASA3,AGAP3,GNAO1,DLC1,SIPA1L3,LIMS1,DOCK10,PREX2,ARHGAP18,STARD13,DOCK8,IQGAP2,NPRL3,ARHGAP6,RGS10,ARHGEF11,TBC1D8,SGSM1,SGSM3,RGS12,RGS20,CCDC125,DOCK9,ARHGAP5,MYO9B,ARHGAP31,ARHGAP23,ADAP2,RSU1
3.AD/1.YC	GABA_neurons	Up	GO BP	GOBP_REGULATION_OF_CARDIAC_MUSCLE_CONTRACTION	GOBP_REGULATION_OF_CARDIAC_MUSCLE_CONTRACTION	1.58158	0.0055131	0.174528	ADRA1B,ADRA1A,AKAP9,BIN1,PKP2,CAMK2D,GSTM2,PDE4B,PDE4D
3.AD/1.YC	GABA_neurons	Up	GO BP	GOBP_RESPIRATORY_ELECTRON_TRANSPORT_CHAIN	GOBP_RESPIRATORY_ELECTRON_TRANSPORT_CHAIN	1.318	0.00568053	0.178789	MT-ND5,MT-ND6,MT-ND4,SLC25A12,SDHA,MT-CO2,MT-CO3,MT-CYB,MT-ND1,MT-ND2,MT-ND3,MT-ND4L
3.AD/1.YC	GABA_neurons	Up	GO BP	GOBP_EXCITATORY_SYNAPSE_ASSEMBLY	GOBP_EXCITATORY_SYNAPSE_ASSEMBLY	2.31451	0.00591958	0.184183	NLGN1,SHANK1,NRXN1,NRXN2,GRID2
3.AD/1.YC	GABA_neurons	Up	GO BP	GOBP_REGULATION_OF_INTRACELLULAR_SIGNAL_TRANSDUCTION	GOBP_REGULATION_OF_INTRACELLULAR_SIGNAL_TRANSDUCTION	0.445277	0.00604607	0.18705	DNM2,EGFR,FLNA,CHD5,LGALS9,ARRB1,PDE3A,ASH1L,MAP2K6,RPA1,SOS1,TP63,CBL,PTPRC,KLHL22,TAOK3,RAD9A,BCL2L1,CHD3,NACC2,HIPK2,HDAC1,HMGB1,NEDD4,PPARA,NR1H4,STK38,CHRNA7,ADRA1B,ADRA1A,KLB,EPHA7,ERBB4,RASA3,ANKRD6,ALK,PTPN22,GCNT2,ANGPT1,GRIK2,INSR,ITPKB,MID1,MINK1,PAK3,NECAB2,PELI2,HRH4,ROBO1,WNK2,TEK,TRAF5,PDGFD,IRS2,CD74,RASSF2,EPS8,L3MBTL1,RFC3,DLC1,NLGN1,SIPA1L3,KANK1,GREM1,LIMS1,PIK3CA,CDC42SE2,SEM…
3.AD/1.YC	GABA_neurons	Up	GO BP	GOBP_REGULATION_OF_RECEPTOR_MEDIATED_ENDOCYTOSIS	GOBP_REGULATION_OF_RECEPTOR_MEDIATED_ENDOCYTOSIS	1.37405	0.00610105	0.187193	DNM2,ARRB1,CBL,ANGPT1,INSR,NECAB2,BICD1,GREM1,PLCG2,APOC1,HIP1
3.AD/1.YC	GABA_neurons	Up	GO BP	GOBP_ACTIN_FILAMENT_ORGANIZATION	GOBP_ACTIN_FILAMENT_ORGANIZATION	0.800141	0.00613213	0.187193	FLNA,ARRB1,SPTBN4,PROX1,PAK3,CCDC88A,MCU,EPS8,COBL,WASF2,DLC1,KANK1,TMEFF2,MYO7A,SHANK1,PIK3CA,SHTN1,SEMA5A,ARHGAP18,SVIL,PLS3,BIN1,GSN,IQGAP2,PPM1E,ARHGAP6,NEB,LIMA1,SSH2,HIP1,NEBL,TTC17
3.AD/1.YC	GABA_neurons	Up	GO BP	GOBP_POSTSYNAPTIC_MEMBRANE_ORGANIZATION	GOBP_POSTSYNAPTIC_MEMBRANE_ORGANIZATION	2.01685	0.00630663	0.189722	SHISA6,NLGN1,NRXN1,NRXN2,ZMYND8,LHFPL4
3.AD/1.YC	GABA_neurons	Up	GO BP	GOBP_REGULATION_OF_ACTIN_FILAMENT_BASED_MOVEMENT	GOBP_REGULATION_OF_ACTIN_FILAMENT_BASED_MOVEMENT	2.01685	0.00630663	0.189722	AKAP9,BIN1,PKP2,CAMK2D,PDE4B,PDE4D
3.AD/1.YC	GABA_neurons	Up	GO BP	GOBP_POSITIVE_REGULATION_OF_NEUROTRANSMITTER_SECRETION	GOBP_POSITIVE_REGULATION_OF_NEUROTRANSMITTER_SECRETION	2.6831	0.00649196	0.192748	CNR1,NLGN1,SYT1,DTNBP1
3.AD/1.YC	GABA_neurons	Up	GO BP	GOBP_MONOCYTE_CHEMOTACTIC_PROTEIN_1_PRODUCTION	GOBP_MONOCYTE_CHEMOTACTIC_PROTEIN_1_PRODUCTION	2.6831	0.00649196	0.192748	LGALS9,HMGB1,NR1H4,ERBIN
3.AD/1.YC	GABA_neurons	Up	GO BP	GOBP_FOREBRAIN_DEVELOPMENT	GOBP_FOREBRAIN_DEVELOPMENT	0.851317	0.00651342	0.192748	FLNA,CHD5,ROBO2,SALL1,KDM2B,PROX1,DLX1,HDAC1,DNAJB1,NFIB,NR2E1,MCPH1,ERBB4,ALK,ROBO1,BMERB1,KDM6B,GNAO1,DLC1,DAB1,EPHA5,CNTNAP2,MFSD2A,SEMA5A,TYROBP,FAT4,EMX2,GNG12
3.AD/1.YC	GABA_neurons	Up	GO BP	GOBP_CYTOSKELETON_ORGANIZATION	GOBP_CYTOSKELETON_ORGANIZATION	0.486925	0.00656905	0.193343	MAST2,FLNA,TUBB8,ARRB1,SPTBN4,CFAP43,TNKS,PROX1,CHD3,MCPH1,MID1,MINK1,PAK3,TEK,AKAP9,DNAAF4,TOGARAM2,NINL,NCKAP5,MAP4,TTLL13P,HYDIN,CNTLN,FIGN,CCDC88A,CENPJ,PARD3,BICD1,TBCE,JHY,BMERB1,CEP135,MCU,EPS8,ANK3,COBL,WASF2,DLC1,PDLIM5,FGD5,SH3D19,EPHA5,NLGN1,PALLD,SIPA1L3,KANK1,TMEFF2,MYO7A,SHANK1,ATP8A2,PIK3CA,SHTN1,DTNBP1,SEMA5A,ARHGAP18,SVIL,PLS3,TYROBP,BIN1,PKP2,MTSS1,STARD13,GSN,IQGAP2,ERBIN,PAK4,…
3.AD/1.YC	GABA_neurons	Up	GO BP	GOBP_VASCULAR_TRANSPORT	GOBP_VASCULAR_TRANSPORT	1.42604	0.00696867	0.20048	INSR,MFSD2A,SLC24A3,SLC22A3,SLCO3A1,ABCC4,SLC2A13,SLC16A12,ABCC1,SLCO1C1
3.AD/1.YC	GABA_neurons	Up	GO BP	GOBP_RESPONSE_TO_DOPAMINE	GOBP_RESPONSE_TO_DOPAMINE	1.42604	0.00696867	0.20048	DNM2,FLNA,ALK,HRH4,GNAO1,DTNBP1,CHRM5,GNG2,CHRM3,HTR1F
3.AD/1.YC	GABA_neurons	Up	GO BP	GOBP_RESPONSE_TO_INTERLEUKIN_7	GOBP_RESPONSE_TO_INTERLEUKIN_7	2.24724	0.00699561	0.20048	STAT5B,HMGB1,SMARCA4,IRS2,STIP1
3.AD/1.YC	GABA_neurons	Up	GO BP	GOBP_POSITIVE_REGULATION_OF_EXCITATORY_POSTSYNAPTIC_POTENTIAL	GOBP_POSITIVE_REGULATION_OF_EXCITATORY_POSTSYNAPTIC_POTENTIAL	2.24724	0.00699561	0.20048	RIMS1,CHRNA7,NLGN1,SHANK1,NRXN1
3.AD/1.YC	GABA_neurons	Up	GO BP	GOBP_NEGATIVE_REGULATION_OF_NOTCH_SIGNALING_PATHWAY	GOBP_NEGATIVE_REGULATION_OF_NOTCH_SIGNALING_PATHWAY	1.97102	0.00720487	0.205395	EGFR,ARRB1,WWP2,DLX1,ZBTB7A,TSPAN15
3.AD/1.YC	GABA_neurons	Up	GO BP	GOBP_OXIDATIVE_PHOSPHORYLATION	GOBP_OXIDATIVE_PHOSPHORYLATION	1.18874	0.00727307	0.20626	MT-ND5,MT-ND6,MT-ND4,AK4,SDHA,MT-ATP6,MT-ATP8,MT-CO2,MT-CO3,MT-CYB,MT-ND1,MT-ND2,MT-ND3,MT-ND4L
3.AD/1.YC	GABA_neurons	Up	GO BP	GOBP_POSITIVE_REGULATION_OF_DEVELOPMENTAL_GROWTH	GOBP_POSITIVE_REGULATION_OF_DEVELOPMENTAL_GROWTH	1.12001	0.00740164	0.207742	RIMS1,SPTBN4,STAT5B,PROX1,NEDD4L,ERBB4,INSR,CDH4,DSCAM,ITSN2,ATP8A2,SHTN1,SYT1,SEMA5A,TGFBR3
3.AD/1.YC	GABA_neurons	Up	GO BP	GOBP_RESPONSE_TO_CALCIUM_ION	GOBP_RESPONSE_TO_CALCIUM_ION	1.1775	0.00759965	0.212206	SYT6,EGFR,NEDD4,ITPKB,NLGN1,SYT1,RYR1,KCNMB2,CAMK2D,STIM1,CACNG2,SLC25A12,MT-CYB,CPNE2
3.AD/1.YC	GABA_neurons	Up	GO BP	GOBP_NEGATIVE_REGULATION_OF_SODIUM_ION_TRANSPORT	GOBP_NEGATIVE_REGULATION_OF_SODIUM_ION_TRANSPORT	2.57626	0.00804824	0.218284	NEDD4L,NEDD4,WNK2,CAMK2D
3.AD/1.YC	GABA_neurons	Up	GO BP	GOBP_CHROMATIN_DISASSEMBLY	GOBP_CHROMATIN_DISASSEMBLY	2.57626	0.00804824	0.218284	SMARCA4,SMARCD3,SMARCB1,PADI2
3.AD/1.YC	GABA_neurons	Up	GO BP	GOBP_NEGATIVE_REGULATION_OF_TRANSMEMBRANE_RECEPTOR_PROTEIN_SERINE_THREONINE_KINASE_SIGNALING_PATHWAY	GOBP_NEGATIVE_REGULATION_OF_TRANSMEMBRANE_RECEPTOR_PROTEIN_SERINE_THREONINE_KINASE_SIGNALING_PATHWAY	1.25957	0.00808148	0.218284	DNM2,HTRA1,DLX1,HIPK2,ZBTB7A,PPARA,IL17RD,GREM1,CHST11,TGFBR3,PMEPA1,SNX6,VWC2
3.AD/1.YC	GABA_neurons	Up	GO BP	GOBP_NEURON_PROJECTION_ORGANIZATION	GOBP_NEURON_PROJECTION_ORGANIZATION	1.38944	0.00814168	0.218284	CHRNA7,INSR,PAK3,ARMCX5-GPRASP2,PDLIM5,NLGN1,SHANK1,DOCK10,SRCIN1,ZMYND8
3.AD/1.YC	GABA_neurons	Up	GO BP	GOBP_REGULATION_OF_HEART_RATE_BY_CARDIAC_CONDUCTION	GOBP_REGULATION_OF_HEART_RATE_BY_CARDIAC_CONDUCTION	1.92628	0.008192	0.218284	AKAP9,BIN1,KCND3,KCNJ3,PKP2,CAMK2D
3.AD/1.YC	GABA_neurons	Up	GO BP	GOBP_POSITIVE_REGULATION_OF_ATP_METABOLIC_PROCESS	GOBP_POSITIVE_REGULATION_OF_ATP_METABOLIC_PROCESS	1.92628	0.008192	0.218284	ZBTB20,PPARA,INSR,SLC25A12,PFKFB4,MT-CO2
3.AD/1.YC	GABA_neurons	Up	GO BP	GOBP_REGULATION_OF_NEURON_MIGRATION	GOBP_REGULATION_OF_NEURON_MIGRATION	1.92628	0.008192	0.218284	FLNA,ERBB4,NTNG1,SHTN1,ZNF609,NEXMIF
3.AD/1.YC	GABA_neurons	Up	GO BP	GOBP_OLFACTORY_LOBE_DEVELOPMENT	GOBP_OLFACTORY_LOBE_DEVELOPMENT	2.18318	0.00820109	0.218284	ROBO2,SALL1,NR2E1,ERBB4,ROBO1
3.AD/1.YC	GABA_neurons	Up	GO BP	GOBP_NEURON_PROJECTION_ARBORIZATION	GOBP_NEURON_PROJECTION_ARBORIZATION	2.18318	0.00820109	0.218284	CHRNA7,NTNG1,NLGN1,GRIP1,MFSD2A
3.AD/1.YC	GABA_neurons	Up	GO BP	GOBP_POSITIVE_REGULATION_OF_DEVELOPMENTAL_PROCESS	GOBP_POSITIVE_REGULATION_OF_DEVELOPMENTAL_PROCESS	0.494981	0.00821821	0.218284	DNM2,RIMS1,FLNA,LGALS9,PDE3A,SPTBN4,ROBO2,STAT5B,KDM2B,TP63,PTPRC,PROX1,DLX1,ZBTB1,ZHX3,NEDD4L,HIPK2,HDAC1,HMGB1,NFATC2,TCF3,NR2E1,SOX13,ZEB2,NR1H4,CHRNA7,ERBB4,ALK,GCNT2,INSR,ITPKB,PAK3,ROBO1,TEK,CD74,MCU,CDKN2A,SMARCD3,COBL,CDH4,ARMCX5-GPRASP2,DAB1,DSCAM,NLGN1,GRIP1,GREM1,LIMS1,ITSN2,SHANK1,ATP8A2,SHTN1,SYT1,SEMA5A,NRXN1,LTBP3,TYROBP,TMEM64,PRKD1,BIN1,TGFBR3,ATP11C,HLA-DRA,NFKBIZ,GPRC5B,PAK4,MM…
3.AD/1.YC	GABA_neurons	Up	GO BP	GOBP_CARDIAC_MUSCLE_CELL_ACTION_POTENTIAL_INVOLVED_IN_CONTRACTION	GOBP_CARDIAC_MUSCLE_CELL_ACTION_POTENTIAL_INVOLVED_IN_CONTRACTION	1.73472	0.00831725	0.219842	FLNA,NEDD4L,BIN1,KCND3,KCNJ3,KCNN2,PKP2
3.AD/1.YC	GABA_neurons	Up	GO BP	GOBP_SYNAPSE_ASSEMBLY	GOBP_SYNAPSE_ASSEMBLY	1.10857	0.00854175	0.224685	ROBO2,EPHA7,ERBB4,ARMCX5-GPRASP2,PDLIM5,DSCAM,NLGN1,SHANK1,NRXN1,NRXN2,SDK2,MDGA1,LHFPL4,GRID2,SDK1,LINGO2
3.AD/1.YC	GABA_neurons	Up	GO BP	GOBP_CELL_GROWTH	GOBP_CELL_GROWTH	0.729467	0.00861866	0.225618	DNM2,EGFR,RIMS1,KDM2B,KLHL22,NEDD4L,PPARA,SMARCA4,ADRA1A,EPHA7,CDKN2A,PRMT2,COBL,CDH4,PDLIM5,DSCAM,ALCAM,GREM1,ITGA4,ITSN2,SHTN1,SGK1,SYT1,SEMA6D,MFSD2A,SEMA5A,CAMK2D,PAK4,ARHGEF11,DNAJB2,GNG4,RERG,MEG3
3.AD/1.YC	GABA_neurons	Up	GO BP	GOBP_REGULATION_OF_NOTCH_SIGNALING_PATHWAY	GOBP_REGULATION_OF_NOTCH_SIGNALING_PATHWAY	1.29482	0.00874283	0.227774	EGFR,ARRB1,ROBO2,TP63,WWP2,DLX1,ZBTB7A,ROBO1,YJEFN3,MAML3,TSPAN15
3.AD/1.YC	GABA_neurons	Up	GO BP	GOBP_HISTONE_H3_K36_DEMETHYLATION	GOBP_HISTONE_H3_K36_DEMETHYLATION	3.15992	0.00906991	0.234055	KDM2B,KDM2A,KDM4B
3.AD/1.YC	GABA_neurons	Up	GO BP	GOBP_ATRIAL_CARDIAC_MUSCLE_CELL_MEMBRANE_REPOLARIZATION	GOBP_ATRIAL_CARDIAC_MUSCLE_CELL_MEMBRANE_REPOLARIZATION	3.15992	0.00906991	0.234055	FLNA,KCNJ3,KCNN2
3.AD/1.YC	GABA_neurons	Up	GO BP	GOBP_NEGATIVE_REGULATION_OF_SIGNALING	GOBP_NEGATIVE_REGULATION_OF_SIGNALING	0.474845	0.00921929	0.236045	DNM2,EGFR,GLRA1,SHISA6,ARRB1,PDE3A,ASH1L,HTRA1,CELF4,TP63,CBL,PTPRC,CHMP6,TAOK3,BCL2L1,WWP2,DLX1,HIPK2,HDAC1,NEDD4,ZBTB7A,WWOX,PPARA,SMARCA4,SOX13,ZNF536,NR1H4,STK38,ADRA1A,RASA3,ANKRD6,PTPN22,GRIK2,NECAB2,IL17RD,ROBO1,WNK2,CD74,RASSF2,BICD1,LATS2,AATF,CXXC4,DLC1,DAB1,KANK1,GREM1,CASTOR3,CASTOR2,CHST11,TULP3,DHRS3,TMEM64,TGFBR3,BICC1,PADI2,NXN,CD22,PDE4B,SYTL4,CARD8,NFATC1,PDE4D,ERBIN,PMEPA1,SNX6…
3.AD/1.YC	GABA_neurons	Up	GO BP	GOBP_REGULATION_OF_SYNAPTIC_PLASTICITY	GOBP_REGULATION_OF_SYNAPTIC_PLASTICITY	1.08077	0.00923433	0.236045	RIMS1,SHISA6,NR2E1,CHRNA7,GRIK2,NLGN1,SHANK1,TYROBP,GRID2,GRIN2D,FGF14,ERC1,GRIA1,SHISA9,JPH4,SORCS3
3.AD/1.YC	GABA_neurons	Up	GO BP	GOBP_RESPONSE_TO_CATECHOLAMINE	GOBP_RESPONSE_TO_CATECHOLAMINE	1.27947	0.00936377	0.236045	DNM2,FLNA,ALK,HRH4,GNAO1,DTNBP1,CHRM5,GNG2,PDE4B,CHRM3,HTR1F
3.AD/1.YC	GABA_neurons	Up	GO BP	GOBP_POSITIVE_REGULATION_OF_PLASMA_MEMBRANE_BOUNDED_CELL_PROJECTION_ASSEMBLY	GOBP_POSITIVE_REGULATION_OF_PLASMA_MEMBRANE_BOUNDED_CELL_PROJECTION_ASSEMBLY	1.27947	0.00936377	0.236045	DNM2,MNS1,CCDC88A,CEP135,EPS8,COBL,WASF2,NLGN1,PIK3CA,ZMYND8,FNBP1L
3.AD/1.YC	GABA_neurons	Up	GO BP	GOBP_PHOSPHOLIPID_TRANSPORT	GOBP_PHOSPHOLIPID_TRANSPORT	1.35348	0.00946092	0.237395	ATP8A2,MFSD2A,ATP11A,ATP11C,ATP8B4,ABCC1,APOC1,ANO4,PLSCR5,PITPNC1
3.AD/1.YC	GABA_neurons	Up	GO BP	GOBP_NEGATIVE_REGULATION_OF_PROTEIN_TYROSINE_KINASE_ACTIVITY	GOBP_NEGATIVE_REGULATION_OF_PROTEIN_TYROSINE_KINASE_ACTIVITY	2.12171	0.00954326	0.237749	CBL,PTPRC,CHMP6,SRCIN1,SNX6
3.AD/1.YC	GABA_neurons	Up	GO BP	GOBP_NEGATIVE_REGULATION_OF_CYTOSKELETON_ORGANIZATION	GOBP_NEGATIVE_REGULATION_OF_CYTOSKELETON_ORGANIZATION	1.12254	0.00956234	0.237749	SPTBN4,BMERB1,EPS8,WASF2,DLC1,KANK1,TMEFF2,SHANK1,PIK3CA,SVIL,GSN,ARHGAP6,LIMA1,SSH2
3.AD/1.YC	GABA_neurons	Up	GO BP	GOBP_G_PROTEIN_COUPLED_ACETYLCHOLINE_RECEPTOR_SIGNALING_PATHWAY	GOBP_G_PROTEIN_COUPLED_ACETYLCHOLINE_RECEPTOR_SIGNALING_PATHWAY	2.47692	0.00983043	0.242202	HRH4,CHRM5,RGS10,CHRM3
3.AD/1.YC	GABA_neurons	Up	GO BP	GOBP_REGULATION_OF_ATP_BIOSYNTHETIC_PROCESS	GOBP_REGULATION_OF_ATP_BIOSYNTHETIC_PROCESS	2.47692	0.00983043	0.242202	PPARA,AK4,SLC25A12,MT-CO2
3.AD/1.YC	GABA_neurons	Up	GO BP	GOBP_CELLULAR_RESPONSE_TO_HORMONE_STIMULUS	GOBP_CELLULAR_RESPONSE_TO_HORMONE_STIMULUS	0.64682	0.00996669	0.244453	ADCY7,EGFR,TNC,KDM3A,PTGFR,ROBO2,SOS1,STAT5B,TP63,SAFB2,HDAC1,NEDD4,ZBTB7A,PPARA,RXRA,SMARCA4,NR2E1,HDAC9,NR1H4,INSR,IRS2,DNAAF4,LATS2,PRMT2,KANK1,PIK3CA,SGK1,PIK3R3,PADI2,STXBP4,GNG2,PRKAR2A,PMEPA1,SMYD3,CPEB2,RAB8B,ARID1B,MT-ND3,TRERF1,NR3C2,PTPRE,RXFP1
3.AD/1.YC	GABA_neurons	Up	GO BP	GOBP_REGULATION_OF_WNT_SIGNALING_PATHWAY	GOBP_REGULATION_OF_WNT_SIGNALING_PATHWAY	0.787953	0.0101788	0.247729	EGFR,SHISA6,SALL1,TNKS,CDK14,HDAC1,WWOX,SMARCA4,SOX13,ANKRD6,WNK2,LATS2,CXXC4,KANK1,GREM1,SEMA5A,TMEM64,KLF15,BICC1,NXN,NFATC1,GPRC5B,RBMS3,EDA,LYPD6,RNF220,TLE2
3.AD/1.YC	GABA_neurons	Up	GO BP	GOBP_MITOCHONDRIAL_ELECTRON_TRANSPORT_NADH_TO_UBIQUINONE	GOBP_MITOCHONDRIAL_ELECTRON_TRANSPORT_NADH_TO_UBIQUINONE	1.67042	0.0102367	0.247729	MT-ND5,MT-ND6,MT-ND4,MT-ND1,MT-ND2,MT-ND3,MT-ND4L
3.AD/1.YC	GABA_neurons	Up	GO BP	GOBP_REGULATION_OF_SODIUM_ION_TRANSMEMBRANE_TRANSPORTER_ACTIVITY	GOBP_REGULATION_OF_SODIUM_ION_TRANSMEMBRANE_TRANSPORTER_ACTIVITY	1.67042	0.0102367	0.247729	DNM2,NEDD4L,NEDD4,WNK2,ANK3,CAMK2D,FGF14
3.AD/1.YC	GABA_neurons	Up	GO BP	GOBP_METAL_ION_TRANSPORT	GOBP_METAL_ION_TRANSPORT	0.69897	0.0103778	0.249034	CACNA1I,PTPRC,TRPC4,CHRNA7,ADRA1A,RASA3,MCU,GNAO1,RYR1,SLC24A3,BIN1,KCND3,NTSR1,CAMK2D,PLCG2,GSTM2,PDE4B,IL16,PDE4D,CDH23,STIM1,GRIN2D,FGF14,PKD1L1,CACNG2,CACNG4,AHNAK,MICU1,KCNT2,CACHD1,FAM155A,CACNA1B,SLC41A2,JPH4
3.AD/1.YC	GABA_neurons	Up	GO BP	GOBP_HISTONE_H4_ACETYLATION	GOBP_HISTONE_H4_ACETYLATION	1.52949	0.0103821	0.249034	CHD5,ARRB1,IWS1,SMARCB1,KANSL1L,KANSL1,PHF20,JADE3
3.AD/1.YC	GABA_neurons	Down	GO BP	GOBP_COTRANSLATIONAL_PROTEIN_TARGETING_TO_MEMBRANE	GOBP_COTRANSLATIONAL_PROTEIN_TARGETING_TO_MEMBRANE	5.50207	3.63308e-70	1.97821e-66	RPL29,RPS6,RPL3,RPL5,RPL6,RPL10,RPL11,RPL23A,RPL24,RPLP0,RPSA,RPS5,RPS10,RPS14,RPS15,RPS19,RPS27,RPS28,RPL26,RPS27A,UBA52,RPL23,RPS3,RPL35,RPL13A,RPL10A,RPL4,RPL7,RPL7A,RPL8,RPL9,RPL12,RPL13,RPL15,RPL17,RPL18,RPL18A,RPL19,RPL21,RPL22,RPL27,RPL30,RPL28,RPL31,RPL32,RPL34,RPL35A,RPL37,RPL37A,RPL39,RPL41,RPL36A,RPLP1,RPLP2,RPS2,RPS3A,RPS4X,RPS7,RPS8,RPS9,RPS11,RPS12,RPS13,RPS15A,RPS16,RPS17,RPS18,RPS…
3.AD/1.YC	GABA_neurons	Down	GO BP	GOBP_ESTABLISHMENT_OF_PROTEIN_LOCALIZATION_TO_ENDOPLASMIC_RETICULUM	GOBP_ESTABLISHMENT_OF_PROTEIN_LOCALIZATION_TO_ENDOPLASMIC_RETICULUM	5.07561	8.14638e-69	2.21785e-65	HSPA5,RPL29,RPS6,RPL3,RPL5,RPL6,RPL10,RPL11,RPL23A,RPL24,RPLP0,RPSA,RPS5,RPS10,RPS14,RPS15,RPS19,RPS27,RPS28,RPL26,RPS27A,UBA52,RPL23,RPS3,RPL35,RPL13A,RPL10A,RPL4,RPL7,RPL7A,RPL8,RPL9,RPL12,RPL13,RPL15,RPL17,RPL18,RPL18A,RPL19,RPL21,RPL22,RPL27,RPL30,RPL28,RPL31,RPL32,RPL34,RPL35A,RPL37,RPL37A,RPL39,RPL41,RPL36A,RPLP1,RPLP2,RPS2,RPS3A,RPS4X,RPS7,RPS8,RPS9,RPS11,RPS12,RPS13,RPS15A,RPS16,RPS17,RPS…
3.AD/1.YC	GABA_neurons	Down	GO BP	GOBP_PROTEIN_LOCALIZATION_TO_ENDOPLASMIC_RETICULUM	GOBP_PROTEIN_LOCALIZATION_TO_ENDOPLASMIC_RETICULUM	4.52896	7.4065e-67	1.34428e-63	BCAP31,LRRK2,HSPA5,RPL29,RPS6,RPL3,RPL5,RPL6,RPL10,RPL11,RPL23A,RPL24,RPLP0,RPSA,RPS5,RPS10,RPS14,RPS15,RPS19,RPS27,RPS28,RPL26,RPS27A,UBA52,RPL23,RPS3,RPL35,RPL13A,RPL10A,RPL4,RPL7,RPL7A,RPL8,RPL9,RPL12,RPL13,RPL15,RPL17,RPL18,RPL18A,RPL19,RPL21,RPL22,RPL27,RPL30,RPL28,RPL31,RPL32,RPL34,RPL35A,RPL37,RPL37A,RPL39,RPL41,RPL36A,RPLP1,RPLP2,RPS2,RPS3A,RPS4X,RPS7,RPS8,RPS9,RPS11,RPS12,RPS13,RPS15A,RP…
3.AD/1.YC	GABA_neurons	Down	GO BP	GOBP_NUCLEAR_TRANSCRIBED_MRNA_CATABOLIC_PROCESS_NONSENSE_MEDIATED_DECAY	GOBP_NUCLEAR_TRANSCRIBED_MRNA_CATABOLIC_PROCESS_NONSENSE_MEDIATED_DECAY	4.44249	1.17233e-53	1.59584e-50	RPL29,RPS6,RPL3,RPL5,RPL6,RPL10,RPL11,RPL23A,RPL24,RPLP0,RPSA,RPS5,RPS10,RPS14,RPS15,RPS19,RPS27,RPS28,RPL26,RPS27A,UBA52,RPL23,RPS3,RPL35,RPL13A,RPL10A,RPL4,RPL7,RPL7A,RPL8,RPL9,RPL12,RPL13,RPL15,RPL17,RPL18,RPL18A,RPL19,RPL21,RPL22,RPL27,RPL30,RPL28,RPL31,RPL32,RPL34,RPL35A,RPL37,RPL37A,RPL39,RPL41,RPL36A,RPLP1,RPLP2,RPS2,RPS3A,RPS4X,RPS7,RPS8,RPS9,RPS11,RPS12,RPS13,RPS15A,RPS16,RPS17,RPS18,RPS…
3.AD/1.YC	GABA_neurons	Down	GO BP	GOBP_PROTEIN_TARGETING_TO_MEMBRANE	GOBP_PROTEIN_TARGETING_TO_MEMBRANE	3.51909	1.63412e-51	1.77956e-48	HSPA5,RPL29,RPS6,RPL3,RPL5,RPL6,RPL10,RPL11,RPL23A,RPL24,RPLP0,RPSA,RPS5,RPS10,RPS14,RPS15,RPS19,RPS27,RPS28,RPL26,CDK5,RPS27A,UBA52,RPL23,RPS3,RPL35,RPL13A,RPL10A,RPL4,RPL7,RPL7A,RPL8,RPL9,RPL12,RPL13,RPL15,RPL17,RPL18,RPL18A,RPL19,RPL21,RPL22,RPL27,RPL30,RPL28,RPL31,RPL32,RPL34,RPL35A,RPL37,RPL37A,RPL39,RPL41,RPL36A,RPLP1,RPLP2,RPS2,RPS3A,RPS4X,RPS7,RPS8,RPS9,RPS11,RPS12,RPS13,RPS15A,RPS16,RPS1…
3.AD/1.YC	GABA_neurons	Down	GO BP	GOBP_ESTABLISHMENT_OF_PROTEIN_LOCALIZATION_TO_MEMBRANE	GOBP_ESTABLISHMENT_OF_PROTEIN_LOCALIZATION_TO_MEMBRANE	2.80586	2.58476e-47	2.34567e-44	NECTIN3,HSPA5,RPL29,RPS6,RPL3,RPL5,RPL6,RPL10,RPL11,RPL23A,RPL24,RPLP0,RPSA,RPS5,RPS10,RPS14,RPS15,RPS19,RPS27,RPS28,MMGT1,RAB11A,RPL26,CDK5,RPS27A,UBA52,RPL23,CD24,EMC10,RPS3,YWHAB,CALM1,RPL35,RPL13A,RPL10A,RPL4,RPL7,RPL7A,RPL8,RPL9,RPL12,RPL13,RPL15,RPL17,RPL18,RPL18A,RPL19,RPL21,RPL22,RPL27,RPL30,RPL28,RPL31,RPL32,RPL34,RPL35A,RPL37,RPL37A,RPL39,RPL41,RPL36A,RPLP1,RPLP2,RPS2,RPS3A,RPS4X,RPS7,R…
3.AD/1.YC	GABA_neurons	Down	GO BP	GOBP_TRANSLATIONAL_INITIATION	GOBP_TRANSLATIONAL_INITIATION	3.32333	1.35276e-42	1.05225e-39	TMED2,RPL29,RPS6,RPL3,RPL5,RPL6,RPL10,RPL11,RPL23A,RPL24,RPLP0,RPSA,RPS5,RPS10,RPS14,RPS15,RPS19,RPS27,RPS28,RPL26,RPS27A,UBA52,RPL23,COPS5,RPS3,RPL35,RPL13A,RPL10A,RPL4,RPL7,RPL7A,RPL8,RPL9,RPL12,RPL13,RPL15,RPL17,RPL18,RPL18A,RPL19,RPL21,RPL22,RPL27,RPL30,RPL28,RPL31,RPL32,RPL34,RPL35A,RPL37,RPL37A,RPL39,RPL41,RPL36A,RPLP1,RPLP2,RPS2,RPS3A,RPS4X,RPS7,RPS8,RPS9,RPS11,RPS12,RPS13,RPS15A,RPS16,RPS…
3.AD/1.YC	GABA_neurons	Down	GO BP	GOBP_VIRAL_GENE_EXPRESSION	GOBP_VIRAL_GENE_EXPRESSION	3.25932	1.43101e-41	9.73979e-39	RPL29,RPS6,RPL3,RPL5,RPL6,RPL10,RPL11,RPL23A,RPL24,RPLP0,RPSA,RPS5,RPS10,RPS14,RPS15,RPS19,RPS27,RPS28,RPL26,RPS27A,SUPT4H1,UBA52,RPL23,MDFIC,PSMC3,RPS3,RPL35,RPL13A,RPL10A,RPL4,RPL7,RPL7A,RPL8,RPL9,RPL12,RPL13,RPL15,RPL17,RPL18,RPL18A,RPL19,RPL21,RPL22,RPL27,RPL30,RPL28,RPL31,RPL32,RPL34,RPL35A,RPL37,RPL37A,RPL39,RPL41,RPL36A,RPLP1,RPLP2,RPS2,RPS3A,RPS4X,RPS7,RPS8,RPS9,RPS11,RPS12,RPS13,RPS15A,R…
3.AD/1.YC	GABA_neurons	Down	GO BP	GOBP_PROTEIN_TARGETING	GOBP_PROTEIN_TARGETING	2.38972	1.20825e-38	7.30992e-36	BCAP31,LRRK2,DNAJC19,HSPA5,RPL29,RPS6,UBB,RPL3,RPL5,RPL6,RPL10,RPL11,RPL23A,RPL24,RPLP0,RPSA,RPS5,RPS10,RPS14,RPS15,RPS19,RPS27,RPS28,RPL26,CDK5,RPS27A,UBA52,UBC,RPL23,RPS3,PINK1,YWHAB,RPL35,RPL13A,RPL10A,RPL4,RPL7,RPL7A,RPL8,RPL9,RPL12,RPL13,RPL15,RPL17,RPL18,RPL18A,RPL19,RPL21,RPL22,RPL27,RPL30,RPL28,RPL31,RPL32,RPL34,RPL35A,RPL37,RPL37A,RPL39,RPL41,RPL36A,RPLP1,RPLP2,RPS2,RPS3A,RPS4X,RPS7,RPS8…
3.AD/1.YC	GABA_neurons	Down	GO BP	GOBP_OXIDATIVE_PHOSPHORYLATION	GOBP_OXIDATIVE_PHOSPHORYLATION	3.56238	2.85886e-38	1.55665e-35	PARK7,ISCU,PINK1,PPIF,CHCHD10,ATP5F1B,ATP5F1A,STOML2,NDUFC2,GHITM,COX7A1,COX7A2,ANTKMT,COX7A2L,NDUFAB1,ATP5PD,UQCR11,NDUFA11,COX4I1,COX5B,COX6A1,COX6B1,COX6C,COX7B,COX7C,COX8A,CYC1,UQCRQ,UQCR10,NDUFS7,NDUFA1,NDUFA4,NDUFA5,NDUFA6,NDUFA7,NDUFA8,NDUFB2,NDUFB4,NDUFB5,NDUFB7,NDUFB8,NDUFB9,NDUFB10,NDUFS3,NDUFV1,NDUFS5,NDUFS6,NDUFS8,NDUFA13,CHCHD2,ATP5F1D,ATP5F1E,ATP5PB,ATP5MC1,ATP5MC3,ATP5PF,ATP5PO,CYC…
3.AD/1.YC	GABA_neurons	Down	GO BP	GOBP_NUCLEAR_TRANSCRIBED_MRNA_CATABOLIC_PROCESS	GOBP_NUCLEAR_TRANSCRIBED_MRNA_CATABOLIC_PROCESS	3.02757	4.29067e-36	2.12388e-33	RPL29,RPS6,RPL3,RPL5,RPL6,RPL10,RPL11,RPL23A,RPL24,RPLP0,RPSA,RPS5,RPS10,RPS14,RPS15,RPS19,RPS27,RPS28,RPL26,RPS27A,UBA52,RPL23,RPS3,RPL35,RPL13A,RPL10A,RPL4,RPL7,RPL7A,RPL8,RPL9,RPL12,RPL13,RPL15,RPL17,RPL18,RPL18A,RPL19,RPL21,RPL22,RPL27,RPL30,RPL28,RPL31,RPL32,RPL34,RPL35A,RPL37,RPL37A,RPL39,RPL41,RPL36A,RPLP1,RPLP2,RPS2,RPS3A,RPS4X,RPS7,RPS8,RPS9,RPS11,RPS12,RPS13,RPS15A,RPS16,RPS17,RPS18,RPS…
3.AD/1.YC	GABA_neurons	Down	GO BP	GOBP_ESTABLISHMENT_OF_PROTEIN_LOCALIZATION_TO_ORGANELLE	GOBP_ESTABLISHMENT_OF_PROTEIN_LOCALIZATION_TO_ORGANELLE	2.08694	4.84295e-35	2.19749e-32	BCAP31,CCT7,CCT2,PHB2,LRRK2,DNAJC19,HSPA5,HSP90AB1,RPL29,RPS6,UBB,KPNA2,RPL3,RPL5,RPL6,RPL10,RPL11,RPL23A,RPL24,RPLP0,RPSA,RPS5,RPS10,RPS14,RPS15,RPS19,RPS27,RPS28,RAN,RAB11A,RPL26,SMAD3,RPS27A,UBA52,UBC,RPL23,MDFIC,RPS3,PINK1,YWHAB,CALM1,RPL35,RPL13A,RPL10A,RPL4,RPL7,RPL7A,RPL8,RPL9,RPL12,RPL13,RPL15,RPL17,RPL18,RPL18A,RPL19,RPL21,RPL22,RPL27,RPL30,RPL28,RPL31,RPL32,RPL34,RPL35A,RPL37,RPL37A,RPL…
3.AD/1.YC	GABA_neurons	Down	GO BP	GOBP_ATP_SYNTHESIS_COUPLED_ELECTRON_TRANSPORT	GOBP_ATP_SYNTHESIS_COUPLED_ELECTRON_TRANSPORT	3.78432	1.63456e-30	6.84628e-28	PARK7,ISCU,PINK1,NDUFC2,GHITM,COX7A2L,NDUFAB1,UQCR11,NDUFA11,COX4I1,COX5B,COX6A1,COX6B1,COX6C,COX7B,COX7C,COX8A,CYC1,UQCRQ,UQCR10,NDUFS7,NDUFA1,NDUFA4,NDUFA5,NDUFA6,NDUFA7,NDUFA8,NDUFB2,NDUFB4,NDUFB5,NDUFB7,NDUFB8,NDUFB9,NDUFB10,NDUFS3,NDUFV1,NDUFS5,NDUFS6,NDUFS8,NDUFA13,CHCHD2,CYCS,NDUFB11,NDUFA12,UQCRB,UQCRFS1,UQCRH,UQCC3,COX5A
3.AD/1.YC	GABA_neurons	Down	GO BP	GOBP_PROTEIN_LOCALIZATION_TO_MEMBRANE	GOBP_PROTEIN_LOCALIZATION_TO_MEMBRANE	1.8419	3.37647e-29	1.31321e-26	TMED2,NECTIN3,HSPA5,RAB3A,RPL29,RPS6,RPL3,RPL5,RPL6,RPL10,RPL11,RPL23A,RPL24,RPLP0,RPSA,RPS5,RPS10,RPS14,RPS15,RPS19,RPS27,RPS28,MMGT1,RAB11A,RPL26,CDK5,KCNIP3,RPS27A,UBA52,RPL23,CD24,ARL6IP5,EMC10,RAP2A,RPS3,TPBG,YWHAB,CALM1,CD81,RPL35,RPL13A,RPL10A,RPL4,RPL7,RPL7A,RPL8,RPL9,RPL12,RPL13,RPL15,RPL17,RPL18,RPL18A,RPL19,RPL21,RPL22,RPL27,RPL30,RPL28,RPL31,RPL32,RPL34,RPL35A,RPL37,RPL37A,RPL39,RPL41…
3.AD/1.YC	GABA_neurons	Down	GO BP	GOBP_RESPIRATORY_ELECTRON_TRANSPORT_CHAIN	GOBP_RESPIRATORY_ELECTRON_TRANSPORT_CHAIN	3.44363	2.00501e-28	7.27818e-26	PPARGC1A,PARK7,ISCU,PINK1,SCO2,NDUFC2,GHITM,COX7A2L,NDUFAB1,UQCR11,NDUFA11,COX4I1,COX5B,COX6A1,COX6B1,COX6C,COX7B,COX7C,COX8A,CYC1,UQCRQ,UQCR10,NDUFS7,NDUFA1,NDUFA4,NDUFA5,NDUFA6,NDUFA7,NDUFA8,NDUFB2,NDUFB4,NDUFB5,NDUFB7,NDUFB8,NDUFB9,NDUFB10,NDUFS3,NDUFV1,NDUFS5,NDUFS6,NDUFS8,NDUFA13,CHCHD2,CYCS,NDUFB11,NDUFA12,UQCRB,UQCRFS1,UQCRH,UQCC3,COX5A
3.AD/1.YC	GABA_neurons	Down	GO BP	GOBP_RNA_CATABOLIC_PROCESS	GOBP_RNA_CATABOLIC_PROCESS	2.13865	2.55688e-28	8.70137e-26	MEIOC,RPL29,RPS6,UBB,VIP,RPL3,RPL5,RPL6,RPL10,RPL11,RPL23A,RPL24,RPLP0,RPSA,RPS5,RPS10,RPS14,RPS15,RPS19,RPS27,RPS28,RPL26,RPS27A,UBA52,UBC,RPL23,PSMA3,PSMA7,PSMB1,PSMB3,PSMB6,PSMB10,PSMC3,PSMC5,PSMD2,PSMD7,PSMD8,RPS3,YWHAB,PSMD6,RPL35,RPL13A,RPL10A,RPL4,RPL7,RPL7A,RPL8,RPL9,RPL12,RPL13,RPL15,RPL17,RPL18,RPL18A,RPL19,RPL21,RPL22,RPL27,RPL30,RPL28,RPL31,RPL32,RPL34,RPL35A,RPL37,RPL37A,RPL39,RPL41,…
3.AD/1.YC	GABA_neurons	Down	GO BP	GOBP_ATP_METABOLIC_PROCESS	GOBP_ATP_METABOLIC_PROCESS	2.37514	3.95515e-28	1.26681e-25	PPARGC1A,PARK7,ISCU,ATP6V1B2,ATP6V0C,HTR2A,PINK1,GAPDH,FIS1,PPIF,LDHA,HSPA8,ATP5IF1,CHCHD10,ATP5F1B,ATP1B1,ATP5F1A,TMSB4X,ALDOC,STOML2,NDUFC2,PGAM1,PKM,GHITM,PGK1,COX7A1,COX7A2,ANTKMT,COX7A2L,ENO2,PFKM,TPI1,NDUFAB1,ATP5PD,UQCR11,NDUFA11,COX4I1,COX5B,COX6A1,COX6B1,COX6C,COX7B,COX7C,COX8A,CYC1,UQCRQ,UQCR10,NDUFS7,NDUFA1,NDUFA4,NDUFA5,NDUFA6,NDUFA7,NDUFA8,NDUFB2,NDUFB4,NDUFB5,NDUFB7,NDUFB8,NDUFB9,ND…
3.AD/1.YC	GABA_neurons	Down	GO BP	GOBP_CELLULAR_RESPIRATION	GOBP_CELLULAR_RESPIRATION	2.84166	1.23587e-27	3.73851e-25	PPARGC1A,PARK7,ISCU,NR4A3,PINK1,SCO2,PRELID1,NDUFC2,GHITM,COX7A2L,IDH3A,MDH1,MDH2,PDHB,IDH3B,NDUFAB1,UQCR11,NDUFA11,COX4I1,COX5B,COX6A1,COX6B1,COX6C,COX7B,COX7C,COX8A,CYC1,OPN3,BLOC1S1,UQCRQ,UQCR10,NDUFS7,NDUFA1,NDUFA4,NDUFA5,NDUFA6,NDUFA7,NDUFA8,NDUFB2,NDUFB4,NDUFB5,NDUFB7,NDUFB8,NDUFB9,NDUFB10,NDUFS3,NDUFV1,NDUFS5,NDUFS6,NDUFS8,NDUFA13,CHCHD2,ATP5F1D,CYCS,NDUFB11,NDUFA12,SURF1,UQCRB,UQCRFS1,UQC…
3.AD/1.YC	GABA_neurons	Down	GO BP	GOBP_PEPTIDE_BIOSYNTHETIC_PROCESS	GOBP_PEPTIDE_BIOSYNTHETIC_PROCESS	1.80658	2.09756e-27	6.01116e-25	TMED2,RPL29,RPS6,CALR,RSL24D1,RPL3,RPL5,RPL6,RPL10,RPL11,RPL23A,RPL24,RPLP0,RPSA,RPS5,RPS10,RPS14,RPS15,RPS19,RPS27,RPS28,RPL26,PER1,RPS27A,UBA52,PER2,RPL23,TRMT112,COPS5,RPS3,PINK1,THBS1,RPL35,RPL13A,RPL10A,RPL4,RPL7,RPL7A,RPL8,RPL9,RPL12,RPL13,RPL15,RPL17,RPL18,RPL18A,RPL19,RPL21,RPL22,RPL27,RPL30,RPL28,RPL31,RPL32,RPL34,RPL35A,RPL37,RPL37A,RPL39,RPL41,RPL36A,RPLP1,RPLP2,RPS2,RPS3A,RPS4X,RPS7,R…
3.AD/1.YC	GABA_neurons	Down	GO BP	GOBP_PEPTIDE_METABOLIC_PROCESS	GOBP_PEPTIDE_METABOLIC_PROCESS	1.65971	1.13046e-26	3.07768e-24	TMED2,PARK7,RPL29,RPS6,SOD1,CALR,RSL24D1,RPL3,RPL5,RPL6,RPL10,RPL11,RPL23A,RPL24,RPLP0,RPSA,RPS5,RPS10,RPS14,RPS15,RPS19,RPS27,RPS28,RPL26,PER1,RPS27A,UBA52,PER2,RPL23,TRMT112,ATP6AP2,ARL6IP5,COPS5,PIN1,RPS3,PINK1,THBS1,RPL35,RPL13A,RPL10A,RPL4,RPL7,RPL7A,RPL8,RPL9,RPL12,RPL13,RPL15,RPL17,RPL18,RPL18A,RPL19,RPL21,RPL22,RPL27,RPL30,RPL28,RPL31,RPL32,RPL34,RPL35A,RPL37,RPL37A,RPL39,RPL41,RPL36A,RPL…
3.AD/1.YC	GABA_neurons	Down	GO BP	GOBP_MITOCHONDRION_ORGANIZATION	GOBP_MITOCHONDRION_ORGANIZATION	1.85241	4.13138e-25	1.07121e-22	PPARGC1A,SLC25A4,SLC25A36,BCAP31,PARK7,PHB2,LRRK2,DNAJC19,DCN,RAB3A,VDAC2,CDK5,DYNLT1,CAMKK2,PINK1,YWHAB,CALM1,GABARAP,FIS1,VPS35,MFF,CALM3,CAMK2A,PPIF,MAP1LC3A,UBL5,HAX1,GABARAPL2,FUNDC1,GABARAPL1,CISD2,TOMM7,VDAC1,ATG9A,ATP5IF1,YWHAH,CCK,WASF1,CHCHD10,TOMM20,ATP5F1B,ATP5F1A,SCO2,PRELID1,STOML2,NDUFC2,MLLT11,GHITM,MOAP1,GGCT,HRK,PDCD5,COX7A1,COX7A2,COX7A2L,ALAS1,SLC25A5,SLC25A6,NDUFAB1,ATP5PD,ND…
3.AD/1.YC	GABA_neurons	Down	GO BP	GOBP_INTRACELLULAR_TRANSPORT	GOBP_INTRACELLULAR_TRANSPORT	1.2331	6.05138e-25	1.49772e-22	ACTR2,BCAP31,TMED2,PARK7,PHB2,LRRK2,DNAJC19,HSPA5,HSP90AB1,MAK,RPL29,RPS6,SOD1,UBB,CALR,DYNLL1,KPNA2,RPL3,RPL5,RPL6,RPL10,RPL11,RPL23A,RPL24,RPLP0,RPSA,RPS5,RPS10,RPS14,RPS15,RPS19,RPS27,RPS28,RAN,RAB11A,RPL26,CDK5,KCNIP3,SMAD3,PPM1A,RPS27A,TXN,UBA52,UBC,RPL23,CD24,ERP29,MDFIC,NEFL,STRADB,RPS3,NDRG4,PINK1,YWHAB,CD81,RPL35,RPL13A,RPL10A,RPL4,RPL7,RPL7A,RPL8,RPL9,RPL12,RPL13,RPL15,RPL17,RPL18,RPL18…
3.AD/1.YC	GABA_neurons	Down	GO BP	GOBP_AMIDE_BIOSYNTHETIC_PROCESS	GOBP_AMIDE_BIOSYNTHETIC_PROCESS	1.59346	4.73208e-24	1.12027e-21	TMED2,B4GALNT1,RPL29,RPS6,CALR,RSL24D1,RPL3,RPL5,RPL6,RPL10,RPL11,RPL23A,RPL24,RPLP0,RPSA,RPS5,RPS10,RPS14,RPS15,RPS19,RPS27,RPS28,ACSL6,RPL26,PER1,RPS27A,UBA52,PER2,RPL23,TRMT112,COPS5,RPS3,PINK1,THBS1,RPL35,RPL13A,RPL10A,RPL4,RPL7,RPL7A,RPL8,RPL9,RPL12,RPL13,RPL15,RPL17,RPL18,RPL18A,RPL19,RPL21,RPL22,RPL27,RPL30,RPL28,RPL31,RPL32,RPL34,RPL35A,RPL37,RPL37A,RPL39,RPL41,RPL36A,RPLP1,RPLP2,RPS2,RPS…
3.AD/1.YC	GABA_neurons	Down	GO BP	GOBP_PROTEIN_LOCALIZATION_TO_ORGANELLE	GOBP_PROTEIN_LOCALIZATION_TO_ORGANELLE	1.4597	6.14322e-24	1.30225e-21	BCAP31,CCT7,CCT2,PARK7,PHB2,LRRK2,DNAJC19,HSPA5,HSP90AB1,CCDC39,RPL29,RPS6,BUB1B,UBB,CALR,KPNA2,RPL3,RPL5,RPL6,RPL10,RPL11,RPL23A,RPL24,RPLP0,RPSA,RPS5,RPS10,RPS14,RPS15,RPS19,RPS27,RPS28,MMGT1,RAN,RAB11A,ZWILCH,RPL26,CDK5,SMAD3,RPS27A,TXN,UBA52,UBC,RPL23,EMC10,MDFIC,HTR2A,PIN1,RPS3,SKP1,PINK1,YWHAB,CALM1,CD81,RPL35,RPL13A,RPL10A,RPL4,RPL7,RPL7A,RPL8,RPL9,RPL12,RPL13,RPL15,RPL17,RPL18,RPL18A,RPL1…
3.AD/1.YC	GABA_neurons	Down	GO BP	GOBP_BIOLOGICAL_PROCESS_INVOLVED_IN_SYMBIOTIC_INTERACTION	GOBP_BIOLOGICAL_PROCESS_INVOLVED_IN_SYMBIOTIC_INTERACTION	1.4597	6.14322e-24	1.30225e-21	SLC25A4,BCAP31,PHB2,HSP90AB1,PDGFRA,RPL29,RPS6,TYRO3,UBB,DYNLL1,KPNA2,RPL3,RPL5,RPL6,RPL10,RPL11,RPL23A,RPL24,RPLP0,RPSA,RPS5,RPS10,RPS14,RPS15,RPS19,RPS27,RPS28,ATP6V0C,RAN,RPL26,SMAD3,RPS27A,SATB1,SUPT4H1,UBA52,UBC,RPL23,DYNLT1,FN1,MDFIC,HTR2A,MET,PPIA,PSMA3,PSMA7,PSMB1,PSMB3,PSMB6,PSMB10,PSMC3,RPS3,SKP1,YWHAB,CALM1,CD81,RPL35,RPL13A,RPL10A,RPL4,RPL7,RPL7A,RPL8,RPL9,RPL12,RPL13,RPL15,RPL17,RPL1…
3.AD/1.YC	GABA_neurons	Down	GO BP	GOBP_INTRACELLULAR_PROTEIN_TRANSPORT	GOBP_INTRACELLULAR_PROTEIN_TRANSPORT	1.38332	6.21826e-24	1.30225e-21	BCAP31,TMED2,PARK7,PHB2,LRRK2,DNAJC19,HSPA5,HSP90AB1,MAK,RPL29,RPS6,UBB,CALR,DYNLL1,KPNA2,RPL3,RPL5,RPL6,RPL10,RPL11,RPL23A,RPL24,RPLP0,RPSA,RPS5,RPS10,RPS14,RPS15,RPS19,RPS27,RPS28,RAN,RAB11A,RPL26,CDK5,KCNIP3,SMAD3,PPM1A,RPS27A,TXN,UBA52,UBC,RPL23,CD24,ERP29,MDFIC,STRADB,RPS3,PINK1,YWHAB,CD81,RPL35,RPL13A,RPL10A,RPL4,RPL7,RPL7A,RPL8,RPL9,RPL12,RPL13,RPL15,RPL17,RPL18,RPL18A,RPL19,RPL21,RPL22,RP…
3.AD/1.YC	GABA_neurons	Down	GO BP	GOBP_ESTABLISHMENT_OF_PROTEIN_LOCALIZATION	GOBP_ESTABLISHMENT_OF_PROTEIN_LOCALIZATION	1.15139	1.11762e-23	2.25387e-21	SLC25A4,BCAP31,CCT7,CCT2,TMED2,PARK7,PHB2,LRRK2,DNAJC19,CRH,NECTIN3,HSPA5,HSP90AB1,MAK,RAB3A,RBP4,RPL29,RPS6,UBB,VGF,VIP,CALR,DYNLL1,KPNA2,NDFIP1,RPL3,RPL5,RPL6,RPL10,RPL11,RPL23A,RPL24,RPLP0,RPSA,RPS5,RPS10,RPS14,RPS15,RPS19,RPS27,RPS28,ATP6V1B2,ATP6V0C,ATP6V0B,ATP6AP1,ATP6V1F,MMGT1,ATP6V1G1,RAN,TTN,RAB11A,RPL26,CDK5,KCNIP3,SMAD3,PPM1A,RPS27A,TXN,UBA52,UBC,PER2,RPL23,DYNLT1,CD24,ERP29,ADRA2A,EMC…
3.AD/1.YC	GABA_neurons	Down	GO BP	GOBP_ELECTRON_TRANSPORT_CHAIN	GOBP_ELECTRON_TRANSPORT_CHAIN	2.71543	2.14105e-23	4.16358e-21	PPARGC1A,PARK7,ISCU,NOX4,PINK1,SCO2,NDUFC2,GHITM,GLRX,COX7A1,COX7A2,COX7A2L,IDH3B,NDUFAB1,UQCR11,NDUFA11,COX4I1,COX5B,COX6A1,COX6B1,COX6C,COX7B,COX7C,COX8A,CYC1,UQCRQ,UQCR10,NDUFS7,NDUFA1,NDUFA4,NDUFA5,NDUFA6,NDUFA7,NDUFA8,NDUFB2,NDUFB4,NDUFB5,NDUFB7,NDUFB8,NDUFB9,NDUFB10,NDUFS3,NDUFV1,NDUFS5,NDUFS6,NDUFS8,NDUFA13,CHCHD2,CYCS,NDUFB11,NDUFA12,SURF1,UQCRB,UQCRFS1,UQCRH,UQCC3,COX5A
3.AD/1.YC	GABA_neurons	Down	GO BP	GOBP_GENERATION_OF_PRECURSOR_METABOLITES_AND_ENERGY	GOBP_GENERATION_OF_PRECURSOR_METABOLITES_AND_ENERGY	1.8078	4.74491e-23	8.90898e-21	PPARGC1A,SLC25A4,GNPDA1,PARK7,PHB2,PCDH12,VGF,ISCU,NOX4,NR4A3,PER2,HTR2A,PINK1,CALM1,GAPDH,PPP1CA,UGP2,PPIF,LDHA,ATP5IF1,CHCHD10,ATP5F1B,ALDH1A1,ATP5F1A,SCO2,ALDOC,PRELID1,STOML2,NDUFC2,PGAM1,PKM,GHITM,PGK1,GLRX,COX7A1,COX7A2,ANTKMT,COX7A2L,ENO2,IDH3A,MDH1,MDH2,PDHB,PFKM,RPE,TPI1,RUBCNL,IDH3B,NDUFAB1,TYRP1,ATP5PD,UQCR11,NDUFA11,COX4I1,COX5B,COX6A1,COX6B1,COX6C,COX7B,COX7C,COX8A,CYC1,OPN3,BLOC1S1,…
3.AD/1.YC	GABA_neurons	Down	GO BP	GOBP_CELLULAR_AMIDE_METABOLIC_PROCESS	GOBP_CELLULAR_AMIDE_METABOLIC_PROCESS	1.35551	1.3012e-21	2.36168e-19	GNPDA1,TMED2,PARK7,B4GALNT1,HMGCS1,RPL29,RPS6,SOD1,CALR,RSL24D1,RPL3,RPL5,RPL6,RPL10,RPL11,RPL23A,RPL24,RPLP0,RPSA,RPS5,RPS10,RPS14,RPS15,RPS19,RPS27,RPS28,ACSL6,RPL26,PER1,RPS27A,UBA52,PER2,RPL23,TRMT112,ATP6AP2,ARL6IP5,COPS5,PIN1,RPS3,PINK1,THBS1,RPL35,RPL13A,RPL10A,RPL4,RPL7,RPL7A,RPL8,RPL9,RPL12,RPL13,RPL15,RPL17,RPL18,RPL18A,RPL19,RPL21,RPL22,RPL27,RPL30,RPL28,RPL31,RPL32,RPL34,RPL35A,RPL37,…
3.AD/1.YC	GABA_neurons	Down	GO BP	GOBP_ENERGY_DERIVATION_BY_OXIDATION_OF_ORGANIC_COMPOUNDS	GOBP_ENERGY_DERIVATION_BY_OXIDATION_OF_ORGANIC_COMPOUNDS	2.20017	3.62647e-21	6.36971e-19	PPARGC1A,PARK7,PCDH12,ISCU,NR4A3,PER2,PINK1,CALM1,PPP1CA,UGP2,SCO2,PRELID1,NDUFC2,GHITM,COX7A2L,IDH3A,MDH1,MDH2,PDHB,RUBCNL,IDH3B,NDUFAB1,UQCR11,NDUFA11,COX4I1,COX5B,COX6A1,COX6B1,COX6C,COX7B,COX7C,COX8A,CYC1,OPN3,BLOC1S1,UQCRQ,UQCR10,NDUFS7,NDUFA1,NDUFA4,NDUFA5,NDUFA6,NDUFA7,NDUFA8,NDUFB2,NDUFB4,NDUFB5,NDUFB7,NDUFB8,NDUFB9,NDUFB10,NDUFS3,NDUFV1,NDUFS5,NDUFS6,NDUFS8,NDUFA13,CHCHD2,ATP5F1D,CYCS,ND…
3.AD/1.YC	GABA_neurons	Down	GO BP	GOBP_ORGANIC_CYCLIC_COMPOUND_CATABOLIC_PROCESS	GOBP_ORGANIC_CYCLIC_COMPOUND_CATABOLIC_PROCESS	1.56511	1.73102e-19	2.94544e-17	MEIOC,RPL29,RPS6,UBB,VIP,RPL3,RPL5,RPL6,RPL10,RPL11,RPL23A,RPL24,RPLP0,RPSA,RPS5,RPS10,RPS14,RPS15,RPS19,RPS27,RPS28,RPL26,RPS27A,UBA52,UBC,RPL23,PSMA3,PSMA7,PSMB1,PSMB3,PSMB6,PSMB10,PSMC3,PSMC5,PSMD2,PSMD7,PSMD8,RPS3,YWHAB,PSMD6,RPL35,RPL13A,RPL10A,RPL4,RPL7,RPL7A,RPL8,RPL9,RPL12,RPL13,RPL15,RPL17,RPL18,RPL18A,RPL19,RPL21,RPL22,RPL27,RPL30,RPL28,RPL31,RPL32,RPL34,RPL35A,RPL37,RPL37A,RPL39,RPL41,…
3.AD/1.YC	GABA_neurons	Down	GO BP	GOBP_ORGANONITROGEN_COMPOUND_BIOSYNTHETIC_PROCESS	GOBP_ORGANONITROGEN_COMPOUND_BIOSYNTHETIC_PROCESS	1.09982	3.01663e-19	4.97744e-17	PPARGC1A,TMED2,PARK7,DCN,B4GALNT1,RPL29,RPS6,BMPR1B,CALR,RSL24D1,RPL3,RPL5,RPL6,RPL10,RPL11,RPL23A,RPL24,RPLP0,RPSA,RPS5,RPS10,RPS14,RPS15,RPS19,RPS27,RPS28,ACSL6,ATP6V0C,RPL26,NR4A2,PER1,PPM1A,RPS27A,UBA52,PER2,RPL23,TRMT112,COPS5,RPS3,PINK1,THBS1,RPL35,RPL13A,RPL10A,RPL4,RPL7,RPL7A,RPL8,RPL9,RPL12,RPL13,RPL15,RPL17,RPL18,RPL18A,RPL19,RPL21,RPL22,RPL27,RPL30,RPL28,RPL31,RPL32,RPL34,RPL35A,RPL37,…
3.AD/1.YC	GABA_neurons	Down	GO BP	GOBP_MITOCHONDRIAL_ELECTRON_TRANSPORT_NADH_TO_UBIQUINONE	GOBP_MITOCHONDRIAL_ELECTRON_TRANSPORT_NADH_TO_UBIQUINONE	3.86372	1.61168e-18	2.58106e-16	PARK7,ISCU,PINK1,NDUFC2,NDUFAB1,NDUFA11,NDUFS7,NDUFA1,NDUFA4,NDUFA5,NDUFA6,NDUFA7,NDUFA8,NDUFB2,NDUFB4,NDUFB5,NDUFB7,NDUFB8,NDUFB9,NDUFB10,NDUFS3,NDUFV1,NDUFS5,NDUFS6,NDUFS8,NDUFA13,NDUFB11,NDUFA12
3.AD/1.YC	GABA_neurons	Down	GO BP	GOBP_MRNA_METABOLIC_PROCESS	GOBP_MRNA_METABOLIC_PROCESS	1.31808	7.1604e-17	1.11395e-14	PPARGC1A,MEIOC,RPL29,RPS6,SNRPA1,UBB,VIP,RPL3,RPL5,RPL6,RPL10,RPL11,RPL23A,RPL24,RPLP0,RPSA,RPS5,RPS10,RPS14,RPS15,RPS19,RPS27,RPS28,RPL26,RPS27A,SUPT4H1,UBA52,UBC,RPL23,PSMA3,PSMA7,PSMB1,PSMB3,PSMB6,PSMB10,PSMC3,PSMC5,PSMD2,PSMD7,PSMD8,RPS3,YWHAB,WDR83,PSMD6,RPL35,RPL13A,RPL10A,RPL4,RPL7,RPL7A,RPL8,RPL9,RPL12,RPL13,RPL15,RPL17,RPL18,RPL18A,RPL19,RPL21,RPL22,RPL27,RPL30,RPL28,RPL31,RPL32,RPL34,RP…
3.AD/1.YC	GABA_neurons	Down	GO BP	GOBP_CELLULAR_MACROMOLECULE_LOCALIZATION	GOBP_CELLULAR_MACROMOLECULE_LOCALIZATION	0.943946	9.07773e-16	1.3359e-13	BCAP31,CCT7,CCT2,TMED2,PARK7,PHB2,LRRK2,DNAJC19,NECTIN3,HSPA5,HSP90AB1,CCDC39,MAK,RAB3A,RPL29,RPS6,BUB1B,UBB,CALR,DYNLL1,KPNA2,RPL3,RPL5,RPL6,RPL10,RPL11,RPL23A,RPL24,RPLP0,RPSA,RPS5,RPS10,RPS14,RPS15,RPS19,RPS27,RPS28,MMGT1,RAN,RAB11A,ZWILCH,RPL26,CDK5,KCNIP3,SMAD3,PPM1A,RPS27A,TXN,UBA52,UBC,RPL23,CD24,ARL6IP5,ERP29,EMC10,LAMTOR2,MDFIC,HTR2A,PIN1,STRADB,RAP2A,RIT2,RPS3,SKP1,PINK1,TPBG,YWHAB,CALM…
3.AD/1.YC	GABA_neurons	Down	GO BP	GOBP_PROTON_TRANSMEMBRANE_TRANSPORT	GOBP_PROTON_TRANSMEMBRANE_TRANSPORT	2.40348	9.3827e-16	1.34444e-13	PARK7,PHB2,ATP6V1B2,ATP6V0C,ATP6V0B,ATP6AP1,ATP6V1F,ATP6V1G1,PPIF,ATP5F1B,ATP2A2,ATP1A1,ATP5F1A,TMSB4X,STOML2,COX7A1,COX7A2,ANTKMT,COX7A2L,SLC36A1,PM20D1,ATP5PD,COX4I1,COX6A1,COX6B1,COX6C,COX7B,COX7C,COX8A,NDUFS7,NDUFA4,ATP5F1D,ATP5F1E,ATP5PB,ATP5MC1,ATP5MC3,ATP5PF,ATP5PO,SURF1,SLC25A14,COX5A,ATP5MF,MFSD3,SLC25A3
3.AD/1.YC	GABA_neurons	Down	GO BP	GOBP_MACROMOLECULE_CATABOLIC_PROCESS	GOBP_MACROMOLECULE_CATABOLIC_PROCESS	1.05744	1.05556e-15	1.47372e-13	BCAP31,PARK7,LRRK2,DCN,MEIOC,HSPA5,HSP90AB1,SERPINE2,PITHD1,RPL29,RPS6,BUB1B,UBB,VIP,MAGEF1,NDFIP1,RPL3,RPL5,RPL6,RPL10,RPL11,RPL23A,RPL24,RPLP0,RPSA,RPS5,RPS10,RPS14,RPS15,RPS19,RPS27,RPS28,ANAPC11,PLK2,RPL26,CDK5,SMAD3,RPS27A,UBA52,UBC,RPL23,ADRA2A,SH3RF2,ARAF,PIN1,PSMA3,PSMA7,PSMB1,PSMB3,PSMB6,PSMB10,PSMC3,PSMC5,PSMD2,PSMD7,PSMD8,RPS3,SKP1,PINK1,UCHL1,YWHAB,CALM1,CD81,PSMD6,RPL35,RPL13A,RPL10A…
3.AD/1.YC	GABA_neurons	Down	GO BP	GOBP_MITOCHONDRIAL_RESPIRATORY_CHAIN_COMPLEX_ASSEMBLY	GOBP_MITOCHONDRIAL_RESPIRATORY_CHAIN_COMPLEX_ASSEMBLY	2.7901	1.46835e-15	1.99879e-13	SCO2,NDUFC2,NDUFAB1,NDUFA11,NDUFS7,NDUFA1,NDUFA5,NDUFA6,NDUFA7,NDUFA8,NDUFB2,NDUFB4,NDUFB5,NDUFB7,NDUFB8,NDUFB9,NDUFB10,NDUFS3,NDUFV1,NDUFS5,NDUFS6,NDUFS8,NDUFA13,NDUFB11,NDUFA12,SURF1,UQCRFS1,UQCC3,COA3,COX18,PET100,NDUFAF8,NDUFAF4,TMEM126A,COX14
3.AD/1.YC	GABA_neurons	Down	GO BP	GOBP_CELLULAR_MACROMOLECULE_CATABOLIC_PROCESS	GOBP_CELLULAR_MACROMOLECULE_CATABOLIC_PROCESS	1.1177	1.93302e-15	2.56715e-13	BCAP31,PARK7,LRRK2,MEIOC,HSPA5,HSP90AB1,PITHD1,RPL29,RPS6,BUB1B,UBB,VIP,MAGEF1,NDFIP1,RPL3,RPL5,RPL6,RPL10,RPL11,RPL23A,RPL24,RPLP0,RPSA,RPS5,RPS10,RPS14,RPS15,RPS19,RPS27,RPS28,ANAPC11,PLK2,RPL26,RPS27A,UBA52,UBC,RPL23,SH3RF2,ARAF,PSMA3,PSMA7,PSMB1,PSMB3,PSMB6,PSMB10,PSMC3,PSMC5,PSMD2,PSMD7,PSMD8,RPS3,SKP1,PINK1,UCHL1,YWHAB,CD81,PSMD6,RPL35,RPL13A,RPL10A,RPL4,RPL7,RPL7A,RPL8,RPL9,RPL12,RPL13,RPL…
3.AD/1.YC	GABA_neurons	Down	GO BP	GOBP_CYTOPLASMIC_TRANSLATION	GOBP_CYTOPLASMIC_TRANSLATION	2.74705	7.17539e-15	9.30238e-13	RPL29,RPL6,RPL11,RPL24,RPLP0,RPSA,RPS28,RPL26,RPL13A,RPL10A,RPL8,RPL9,RPL15,RPL17,RPL18,RPL18A,RPL19,RPL22,RPL30,RPL31,RPL32,RPL35A,RPL39,RPL41,RPL36A,RPLP1,RPLP2,RPS21,RPS23,RPS26,EIF5,PKM,DPH1,EIF4A2
3.AD/1.YC	GABA_neurons	Down	GO BP	GOBP_NADH_DEHYDROGENASE_COMPLEX_ASSEMBLY	GOBP_NADH_DEHYDROGENASE_COMPLEX_ASSEMBLY	3.20498	1.4356e-14	1.81787e-12	NDUFC2,NDUFAB1,NDUFA11,NDUFS7,NDUFA1,NDUFA5,NDUFA6,NDUFA7,NDUFA8,NDUFB2,NDUFB4,NDUFB5,NDUFB7,NDUFB8,NDUFB9,NDUFB10,NDUFS3,NDUFV1,NDUFS5,NDUFS6,NDUFS8,NDUFA13,NDUFB11,NDUFA12,NDUFAF8,NDUFAF4,TMEM126A
3.AD/1.YC	GABA_neurons	Down	GO BP	GOBP_TRANSMEMBRANE_TRANSPORT	GOBP_TRANSMEMBRANE_TRANSPORT	0.959181	4.39497e-14	5.43877e-12	PPARGC1A,SLC25A4,SLC25A36,PARK7,PHB2,DNAJC19,CRH,CRHBP,EDN1,HSPA5,TRPC3,UBB,VDAC2,ISCU,SLC39A6,CBLIF,SLC39A1,SCARA5,SLC39A3,SLC22A17,ATP6V1B2,ATP6V0C,ATP6V0B,ATP6AP1,TTYH1,SLC30A3,SLC39A7,ATP6V1F,MMGT1,ATP6V1G1,CDK5,KCNIP3,RPS27A,UBA52,UBC,NR4A3,PER2,ARL6IP5,ADRA2A,HTR2A,NEFL,PSMA3,PSMA7,PSMB1,PSMB3,PSMB6,PSMB10,PSMC3,PSMC5,PSMD2,PSMD7,PSMD8,RGS4,CX3CL1,PINK1,THBS1,CALM1,PSMD6,HECW1,ARPP19,ARF1,P…
3.AD/1.YC	GABA_neurons	Down	GO BP	GOBP_CATION_TRANSPORT	GOBP_CATION_TRANSPORT	1.04861	4.16202e-13	4.92657e-11	PPARGC1A,MAGED2,PARK7,PHB2,CRH,CRHBP,EDN1,SERPINE2,RAB3A,TRPC3,VIP,NDFIP1,ISCU,FTH1,FTL,SLC39A6,CBLIF,SLC39A1,SCARA5,SLC39A3,MELTF,ATOX1,SLC22A17,ATP6V1B2,ATP6V0C,ATP6V0B,ATP6AP1,TTYH1,SLC30A3,SLC39A7,ATP6V1F,MMGT1,ATP6V1G1,CDK5,KCNIP3,PER1,TMBIM6,ADRA2A,HTR2A,NEFL,RGS4,CX3CL1,PINK1,CALM1,ADORA1,HECW1,ARF1,PRKCB,CALM3,CAMK2A,PPIF,FKBP1A,VDAC1,SYT2,EPB41,SCN1B,SYT4,THY1,YWHAH,CALM2,HPCA,ATP2B1,ATP…
3.AD/1.YC	GABA_neurons	Down	GO BP	GOBP_NEGATIVE_REGULATION_OF_GENE_EXPRESSION	GOBP_NEGATIVE_REGULATION_OF_GENE_EXPRESSION	1.04691	7.99258e-13	9.25949e-11	CITED2,PARK7,LRRK2,CRH,MEIOC,HSP90AB1,SERPINF1,SERPINE2,ROS1,RPL29,RPS6,UBB,VIP,CALR,NDFIP1,RPL3,RPL5,RPL6,RPL10,RPL11,RPL23A,RPL24,RPLP0,RPSA,RPS5,RPS10,RPS14,RPS15,RPS19,RPS27,RPS28,RAN,RPL26,SMAD3,RPS27A,TMBIM6,UBA52,UBC,RPL23,CD24,ERP29,SIRPA,FN1,PIN1,PSMA3,PSMA7,PSMB1,PSMB3,PSMB6,PSMB10,PSMC3,PSMC5,PSMD2,PSMD7,PSMD8,RPS3,CX3CL1,PINK1,THBS1,YWHAB,PSMD6,RPL35,RPL13A,RPL10A,RPL4,RPL7,RPL7A,RPL8…
3.AD/1.YC	GABA_neurons	Down	GO BP	GOBP_PROTEIN_CONTAINING_COMPLEX_SUBUNIT_ORGANIZATION	GOBP_PROTEIN_CONTAINING_COMPLEX_SUBUNIT_ORGANIZATION	0.853576	2.35652e-12	2.67318e-10	PPARGC1A,ACTR2,CCT2,TMED2,PARK7,LRRK2,ERCC1,DNAI1,GPX4,HSPA5,HSP90AB1,CCDC39,TAF7L,RAB3A,UBB,VDAC2,CALR,POLQ,RSL24D1,RPL3,RPL5,RPL6,RPL10,RPL11,RPL23A,RPL24,RPLP0,RRP7A,RPSA,RPS5,RPS10,RPS14,RPS15,RPS19,RPS27,RPS28,SCARA5,TTN,EID2,SMAD3,PPM1A,RPS27A,UBA52,UBC,RPL23,TRMT112,FN1,MET,NEFL,PSMC3,PSMC5,RPS3,CX3CL1,SKP1,PINK1,RPL13A,STUB1,UBE2S,CFL1,GABARAP,SPEF1,STMN1,DNAH7,STMN4,CDK5R1,CELF2,PUF60,SN…
3.AD/1.YC	GABA_neurons	Down	GO BP	GOBP_REGULATION_OF_ION_TRANSPORT	GOBP_REGULATION_OF_ION_TRANSPORT	0.944159	1.52063e-11	1.6235e-09	PPARGC1A,SLC25A4,BCAP31,PARK7,PHB2,LRRK2,CRH,CRHBP,EDN1,HSP90AB1,SERPINE2,RAB3A,RBP4,ROS1,TAC1,TRPC3,VIP,DYNLL1,NDFIP1,ISCU,RAN,TTN,RAB11A,CDK5,KCNIP3,SMAD3,PER1,PPM1A,TMBIM6,TXN,NR4A3,PER2,ARL6IP5,ERP29,ADRA2A,MDFIC,HTR2A,NEFL,PPIA,CAMK2N1,RGS4,CX3CL1,PINK1,THBS1,YWHAB,CALM1,CD81,ADORA1,CARTPT,HECW1,CDK5R1,FIS1,MFF,ARPP19,ECT2,ARF1,LRP5,PRKCB,CALM3,CAMK2A,PPIF,RACK1,HSPA8,UBL5,FKBP1A,HAX1,TOMM7,…
3.AD/1.YC	GABA_neurons	Down	GO BP	GOBP_CELLULAR_PROTEIN_CONTAINING_COMPLEX_ASSEMBLY	GOBP_CELLULAR_PROTEIN_CONTAINING_COMPLEX_ASSEMBLY	1.02311	3.19999e-11	3.35076e-09	ACTR2,CCT2,DNAI1,GPX4,HSP90AB1,CCDC39,TAF7L,RAB3A,UBB,VDAC2,CALR,RSL24D1,RPL3,RPL5,RPL6,RPL10,RPL11,RPL23A,RPL24,RPLP0,RRP7A,RPSA,RPS5,RPS10,RPS14,RPS15,RPS19,RPS27,RPS28,TTN,EID2,SMAD3,PPM1A,RPS27A,UBA52,UBC,MET,NEFL,PSMC3,PSMC5,RPS3,PINK1,RPL13A,STUB1,UBE2S,STMN1,DNAH7,CDK5R1,CELF2,PUF60,SNRPD2,SNRPE,SRSF9,ARF1,RPA3,LSM4,FKBP1A,HAX1,PIH1D1,TAF9,SH3GL2,TBCC,WASF1,SNAP25,SNAP47,STX1A,OTOF,PFN1,PF…
3.AD/1.YC	GABA_neurons	Down	GO BP	GOBP_AEROBIC_RESPIRATION	GOBP_AEROBIC_RESPIRATION	2.51257	1.57578e-10	1.61889e-08	COX7A2L,IDH3A,MDH1,MDH2,PDHB,IDH3B,COX4I1,COX5B,COX6A1,COX6B1,COX6C,COX7B,COX7C,COX8A,BLOC1S1,UQCR10,NDUFS7,NDUFA4,NDUFS8,ATP5F1D,CYCS,SURF1,UQCRB,UQCRH,SLC25A14,COX5A
3.AD/1.YC	GABA_neurons	Down	GO BP	GOBP_MITOCHONDRIAL_MEMBRANE_ORGANIZATION	GOBP_MITOCHONDRIAL_MEMBRANE_ORGANIZATION	2.07369	2.30371e-10	2.3229e-08	VDAC2,DYNLT1,PINK1,YWHAB,CALM1,CALM3,CAMK2A,PPIF,ATP5IF1,YWHAH,CHCHD10,ATP5F1B,ATP5F1A,GHITM,MOAP1,PDCD5,SLC25A5,ATP5PD,NDUFA13,ATP5F1D,ATP5F1E,ATP5PB,ATP5MC1,ATP5MC3,ATP5PF,ATP5PO,UQCC3,ATP5MF,TIMM8B,COX18,TMEM14A,RHOT2,MICOS13,MICOS10
3.AD/1.YC	GABA_neurons	Down	GO BP	GOBP_MITOCHONDRIAL_ATP_SYNTHESIS_COUPLED_PROTON_TRANSPORT	GOBP_MITOCHONDRIAL_ATP_SYNTHESIS_COUPLED_PROTON_TRANSPORT	4.21419	4.10843e-10	4.06734e-08	ATP5F1B,ATP5F1A,STOML2,ANTKMT,ATP5PD,ATP5F1D,ATP5F1E,ATP5PB,ATP5MC1,ATP5MC3,ATP5PF,ATP5PO,ATP5MF
3.AD/1.YC	GABA_neurons	Down	GO BP	GOBP_ATP_SYNTHESIS_COUPLED_PROTON_TRANSPORT	GOBP_ATP_SYNTHESIS_COUPLED_PROTON_TRANSPORT	3.90673	4.65893e-10	4.52998e-08	ATP6V0C,ATP5F1B,ATP5F1A,STOML2,ANTKMT,ATP5PD,ATP5F1D,ATP5F1E,ATP5PB,ATP5MC1,ATP5MC3,ATP5PF,ATP5PO,ATP5MF
3.AD/1.YC	GABA_neurons	Down	GO BP	GOBP_MITOCHONDRIAL_TRANSPORT	GOBP_MITOCHONDRIAL_TRANSPORT	1.592	5.0551e-10	4.77512e-08	SLC25A4,SLC25A36,BCAP31,LRRK2,DNAJC19,VDAC2,DYNLT1,PINK1,YWHAB,FIS1,VPS35,MFF,CAMK2A,PPIF,UBL5,HAX1,TOMM7,VDAC1,ATP5IF1,YWHAH,CHCHD10,TOMM20,ATP5F1B,ATP5F1A,MPC2,STOML2,MOAP1,PDCD5,ANTKMT,TMEM14C,SLC25A5,SLC25A6,ATP5PD,NDUFA13,ATP5F1D,ATP5F1E,ATP5PB,ATP5MC1,ATP5MC3,ATP5PF,ATP5PO,SLC25A14,ATP5MF,TIMM8B,TOMM5,SMDT1,COX18,TMEM14A,SLC25A31,RHOT2
3.AD/1.YC	GABA_neurons	Down	GO BP	GOBP_CATION_TRANSMEMBRANE_TRANSPORT	GOBP_CATION_TRANSMEMBRANE_TRANSPORT	1.01035	6.69615e-10	6.17975e-08	PPARGC1A,PARK7,PHB2,CRH,CRHBP,TRPC3,ISCU,SLC39A6,CBLIF,SLC39A1,SCARA5,SLC39A3,ATP6V1B2,ATP6V0C,ATP6V0B,ATP6AP1,TTYH1,SLC30A3,SLC39A7,ATP6V1F,MMGT1,ATP6V1G1,CDK5,KCNIP3,ADRA2A,HTR2A,NEFL,RGS4,CX3CL1,PINK1,CALM1,HECW1,ARF1,CALM3,PPIF,FKBP1A,VDAC1,SCN1B,THY1,YWHAH,CALM2,HPCA,ATP2B1,ATP5F1B,SNAP25,ATP2A2,KCNA1,KCNA2,ATP1A1,ATP1B1,SCN2B,CACNA1G,ATP5F1A,TMSB4X,STOML2,CAPN1,CD63,HOMER1,CEMIP,PLN,GLRX,CO…
3.AD/1.YC	GABA_neurons	Down	GO BP	GOBP_INORGANIC_ION_TRANSMEMBRANE_TRANSPORT	GOBP_INORGANIC_ION_TRANSMEMBRANE_TRANSPORT	1.01476	9.01584e-10	8.18187e-08	PARK7,PHB2,TRPC3,ISCU,SLC39A6,CBLIF,SLC39A1,SCARA5,SLC39A3,ATP6V1B2,ATP6V0C,ATP6V0B,ATP6AP1,TTYH1,SLC30A3,SLC39A7,ATP6V1F,MMGT1,ATP6V1G1,CDK5,KCNIP3,ADRA2A,HTR2A,RGS4,CX3CL1,CALM1,HECW1,ARF1,CALM3,PPIF,FKBP1A,VDAC1,SLC26A5,SCN1B,THY1,YWHAH,CALM2,HPCA,ATP2B1,ATP5F1B,SNAP25,ATP2A2,KCNA1,KCNA2,ATP1A1,ATP1B1,SCN2B,CACNA1G,ATP5F1A,TMSB4X,STOML2,CD63,CEMIP,PLN,GLRX,COX7A1,COX7A2,ANTKMT,COX7A2L,ABCC9,KC…
3.AD/1.YC	GABA_neurons	Down	GO BP	GOBP_TRANSLATIONAL_ELONGATION	GOBP_TRANSLATIONAL_ELONGATION	2.05464	9.90387e-10	8.84042e-08	RPL30,RPLP1,RPLP2,AURKAIP1,GADD45GIP1,RACK1,MRPL12,SELENOT,DPH1,MRPS36,CHCHD1,MRPL55,EEF1B2,EEF1G,MRPL21,MRPL46,MRPL2,MRPL51,MRPL27,MRPS21,MRPL16,MRPS22,MRPS12,MRPL14,MRPS24,MRPL36,MRPL34,MRPS34,SRP9,TUFM,MRPL57,MRPL43
3.AD/1.YC	GABA_neurons	Down	GO BP	GOBP_REGULATION_OF_TRANSPORT	GOBP_REGULATION_OF_TRANSPORT	0.774721	1.2445e-09	1.09295e-07	PPARGC1A,SLC25A4,BCAP31,PARK7,PHB2,LRRK2,CRH,CRHBP,EDN1,HSP90AB1,SERPINE2,RAB3A,RBP4,ROS1,SOD1,TAC1,TRPC3,VIP,CALR,DYNLL1,NDFIP1,ISCU,ATP6AP1,SLC30A3,RAN,TTN,RAB11A,CDK5,KCNIP3,SMAD3,PER1,PPM1A,TMBIM6,TXN,NR4A3,PER2,ARL6IP5,ERP29,SIRPA,ADRA2A,MDFIC,HTR2A,NEFL,PPIA,CAMK2N1,RGS4,RIT2,CX3CL1,NDRG4,PINK1,THBS1,YWHAB,CALM1,WDR54,CD81,ADORA1,CARTPT,HECW1,CDK5R1,FIS1,VPS35,MFF,ARPP19,ECT2,ARF1,LRP5,PRKC…
3.AD/1.YC	GABA_neurons	Down	GO BP	GOBP_MITOCHONDRIAL_ELECTRON_TRANSPORT_CYTOCHROME_C_TO_OXYGEN	GOBP_MITOCHONDRIAL_ELECTRON_TRANSPORT_CYTOCHROME_C_TO_OXYGEN	4.26634	1.5489e-09	1.33869e-07	COX7A2L,COX4I1,COX5B,COX6A1,COX6B1,COX6C,COX7B,COX7C,COX8A,NDUFA4,CYCS,COX5A
3.AD/1.YC	GABA_neurons	Down	GO BP	GOBP_ATP_BIOSYNTHETIC_PROCESS	GOBP_ATP_BIOSYNTHETIC_PROCESS	2.84905	2.32654e-09	1.97938e-07	PPARGC1A,ATP6V0C,PINK1,ATP5F1B,ATP5F1A,TMSB4X,STOML2,PKM,ANTKMT,ATP5PD,ATP5F1D,ATP5F1E,ATP5PB,ATP5MC1,ATP5MC3,ATP5PF,ATP5PO,UQCC3,ATP5MF
3.AD/1.YC	GABA_neurons	Down	GO BP	GOBP_INNER_MITOCHONDRIAL_MEMBRANE_ORGANIZATION	GOBP_INNER_MITOCHONDRIAL_MEMBRANE_ORGANIZATION	2.76641	4.76484e-09	3.99147e-07	PINK1,CHCHD10,ATP5F1B,ATP5F1A,GHITM,ATP5PD,NDUFA13,ATP5F1D,ATP5F1E,ATP5PB,ATP5MC1,ATP5MC3,ATP5PF,ATP5PO,UQCC3,ATP5MF,TIMM8B,MICOS13,MICOS10
3.AD/1.YC	GABA_neurons	Down	GO BP	GOBP_CRISTAE_FORMATION	GOBP_CRISTAE_FORMATION	3.26999	6.44856e-09	5.32006e-07	PINK1,CHCHD10,ATP5F1B,ATP5F1A,ATP5PD,ATP5F1D,ATP5F1E,ATP5PB,ATP5MC1,ATP5MC3,ATP5PF,ATP5PO,UQCC3,ATP5MF,MICOS13
3.AD/1.YC	GABA_neurons	Down	GO BP	GOBP_RIBONUCLEOSIDE_TRIPHOSPHATE_BIOSYNTHETIC_PROCESS	GOBP_RIBONUCLEOSIDE_TRIPHOSPHATE_BIOSYNTHETIC_PROCESS	2.49708	1.00251e-08	8.14723e-07	PPARGC1A,ATP6V0C,PINK1,ATP5F1B,ATP5F1A,TMSB4X,NME1,NME2,STOML2,PKM,ANTKMT,ATP5PD,ATP5F1D,ATP5F1E,ATP5PB,ATP5MC1,ATP5MC3,ATP5PF,ATP5PO,UQCC3,ATP5MF
3.AD/1.YC	GABA_neurons	Down	GO BP	GOBP_RIBONUCLEOSIDE_TRIPHOSPHATE_METABOLIC_PROCESS	GOBP_RIBONUCLEOSIDE_TRIPHOSPHATE_METABOLIC_PROCESS	2.30778	1.48252e-08	1.18711e-06	PPARGC1A,LRRK2,ATP6V0C,RAN,PINK1,ATP5F1B,ATP5F1A,TMSB4X,NME1,NME2,STOML2,PKM,ANTKMT,ATP5PD,ATP5F1D,ATP5F1E,ATP5PB,ATP5MC1,ATP5MC3,ATP5PF,ATP5PO,UQCC3,ATP5MF
3.AD/1.YC	GABA_neurons	Down	GO BP	GOBP_REGULATION_OF_ANION_TRANSPORT	GOBP_REGULATION_OF_ANION_TRANSPORT	0.951351	1.68517e-08	1.32982e-06	SLC25A4,BCAP31,PARK7,LRRK2,CRH,CRHBP,EDN1,HSP90AB1,RAB3A,RBP4,ROS1,TAC1,VIP,DYNLL1,NDFIP1,RAN,TTN,RAB11A,CDK5,SMAD3,PPM1A,TXN,NR4A3,PER2,ARL6IP5,ERP29,ADRA2A,MDFIC,HTR2A,PPIA,CAMK2N1,RGS4,PINK1,THBS1,YWHAB,CD81,ADORA1,CARTPT,CDK5R1,FIS1,MFF,ARPP19,ECT2,ARF1,LRP5,PRKCB,RACK1,HSPA8,UBL5,HAX1,TOMM7,ATP5IF1,SYT2,SYT4,YWHAH,CCK,HPCA,INSIG1,CCN3,SNAP25,SYT11,SNCG,STX1A,SYT5,KCNA2,NMU,DPP4,ADTRP,MPC2,PH…
3.AD/1.YC	GABA_neurons	Down	GO BP	GOBP_MITOCHONDRIAL_ELECTRON_TRANSPORT_UBIQUINOL_TO_CYTOCHROME_C	GOBP_MITOCHONDRIAL_ELECTRON_TRANSPORT_UBIQUINOL_TO_CYTOCHROME_C	4.84912	3.08157e-08	2.39702e-06	UQCR11,CYC1,UQCRQ,UQCR10,CYCS,UQCRB,UQCRFS1,UQCRH,UQCC3
3.AD/1.YC	GABA_neurons	Down	GO BP	GOBP_RIBOSOME_BIOGENESIS	GOBP_RIBOSOME_BIOGENESIS	1.37877	3.47079e-08	2.66176e-06	RPS6,RSL24D1,RPL3,RPL5,RPL6,RPL10,RPL11,RPL23A,RPL24,RPLP0,RRP7A,RPSA,RPS5,RPS10,RPS14,RPS15,RPS19,RPS27,RPS28,RAN,RPL26,TSR3,TRMT112,NOP10,RPL35,RPL10A,RPL7,RPL7A,RPL27,RPL35A,RPS2,RPS7,RPS8,RPS9,RPS16,RPS17,RPS21,RPS24,RPS25,RPL14,SNU13,TSR2,RPL7L1,PIH1D1,POP7,WDR74,GTF3A,IMP3,MRPL36,ZNF658
3.AD/1.YC	GABA_neurons	Down	GO BP	GOBP_REGULATION_OF_TRANSCRIPTION_FROM_RNA_POLYMERASE_II_PROMOTER_IN_RESPONSE_TO_HYPOXIA	GOBP_REGULATION_OF_TRANSCRIPTION_FROM_RNA_POLYMERASE_II_PROMOTER_IN_RESPONSE_TO_HYPOXIA	2.27401	8.45324e-08	6.39277e-06	CITED2,EGR1,UBB,RPS27A,UBA52,UBC,PSMA3,PSMA7,PSMB1,PSMB3,PSMB6,PSMB10,PSMC3,PSMC5,PSMD2,PSMD7,PSMD8,PSMD6,ELOC,ELOB,HIGD1A
3.AD/1.YC	GABA_neurons	Down	GO BP	GOBP_RIBOSOMAL_LARGE_SUBUNIT_BIOGENESIS	GOBP_RIBOSOMAL_LARGE_SUBUNIT_BIOGENESIS	2.33793	9.51434e-08	7.09666e-06	RSL24D1,RPL3,RPL5,RPL6,RPL10,RPL11,RPL23A,RPL24,RPLP0,RPL26,RPL35,RPL10A,RPL7,RPL7A,RPL35A,RPL14,SNU13,RPL7L1,WDR74,GTF3A
3.AD/1.YC	GABA_neurons	Down	GO BP	GOBP_NEURAL_NUCLEUS_DEVELOPMENT	GOBP_NEURAL_NUCLEUS_DEVELOPMENT	2.4991	1.08484e-07	7.98237e-06	FGF9,HSPA5,RAD1,DYNLL1,FOXP2,CALM1,CDK5R1,CALM3,YWHAH,CALM2,CDK5R2,ALDH1A3,CKB,COX6B1,NDUFS3,ATP5PB,ATP5PF,SYNGR3
3.AD/1.YC	GABA_neurons	Down	GO BP	GOBP_RIBOSOMAL_SMALL_SUBUNIT_BIOGENESIS	GOBP_RIBOSOMAL_SMALL_SUBUNIT_BIOGENESIS	2.28212	1.57664e-07	1.14464e-05	RPS6,RRP7A,RPSA,RPS5,RPS10,RPS14,RPS15,RPS19,RPS27,RPS28,TSR3,RPS7,RPS8,RPS16,RPS17,RPS21,RPS24,RPS25,SNU13,TSR2
3.AD/1.YC	GABA_neurons	Down	GO BP	GOBP_SYNAPTIC_SIGNALING	GOBP_SYNAPTIC_SIGNALING	0.94715	1.6481e-07	1.18078e-05	PARK7,LRRK2,CORT,CRH,CRHBP,EDN1,SERPINE2,PNOC,RAB3A,TAC1,VGF,KPNA2,RAB11A,PLK2,CDK5,ADRA2A,HTR2A,PSMC5,RGS4,RIT2,CX3CL1,PINK1,TPBG,CALM1,RPL22,ADORA1,CARTPT,GABARAP,TUBB2B,CDK5R1,LZTS1,ARF1,PRKCB,CALM3,CAMK2A,HSPA8,VDAC1,CSPG5,SYT2,EFNB3,ITPKA,LAMA2,NPTX1,BDNF,SYT4,YWHAH,SST,SNAP25,SNAP47,SLC32A1,SYT11,STX19,ATP2A2,PDZD11,SNCG,STX1A,SYT5,TSPOAP1,CADPS2,OTOF,GJC1,KCNA1,SCN2B,CACNA1G,CALB1,NMU,EGR3…
3.AD/1.YC	GABA_neurons	Down	GO BP	GOBP_NUCLEOSIDE_TRIPHOSPHATE_BIOSYNTHETIC_PROCESS	GOBP_NUCLEOSIDE_TRIPHOSPHATE_BIOSYNTHETIC_PROCESS	2.19846	1.7298e-07	1.22321e-05	PPARGC1A,ATP6V0C,PINK1,ATP5F1B,ATP5F1A,TMSB4X,NME1,NME2,STOML2,PKM,ANTKMT,ATP5PD,ATP5F1D,ATP5F1E,ATP5PB,ATP5MC1,ATP5MC3,ATP5PF,ATP5PO,UQCC3,ATP5MF
3.AD/1.YC	GABA_neurons	Down	GO BP	GOBP_RIBOSOME_ASSEMBLY	GOBP_RIBOSOME_ASSEMBLY	2.43041	1.91139e-07	1.3343e-05	RSL24D1,RPL3,RPL5,RPL6,RPL10,RPL11,RPL23A,RPL24,RPLP0,RRP7A,RPSA,RPS5,RPS10,RPS14,RPS15,RPS19,RPS27,RPS28
3.AD/1.YC	GABA_neurons	Down	GO BP	GOBP_REGULATION_OF_PEPTIDE_TRANSPORT	GOBP_REGULATION_OF_PEPTIDE_TRANSPORT	1.03067	2.28034e-07	1.5717e-05	SLC25A4,BCAP31,PARK7,LRRK2,CRH,CRHBP,HSP90AB1,RBP4,DYNLL1,NDFIP1,RAN,TTN,RAB11A,CDK5,SMAD3,PPM1A,TXN,PER2,ERP29,ADRA2A,MDFIC,PPIA,CAMK2N1,PINK1,YWHAB,CD81,ADORA1,CARTPT,CDK5R1,FIS1,MFF,ECT2,ARF1,LRP5,RACK1,HSPA8,UBL5,HAX1,TOMM7,ATP5IF1,YWHAH,HPCA,INSIG1,CCN3,SNAP25,STX1A,NMU,DPP4,ADTRP,MPC2,PHPT1,SELENOT,VSNL1,C2CD2L,CHGA,CD200,TMEM30A,SELENOK,PDCD5,CEMIP,CAMK1,PTPN14,CYP51A1,SLC25A5,SLC25A6,HMGC…
3.AD/1.YC	GABA_neurons	Down	GO BP	GOBP_MITOCHONDRIAL_TRANSLATIONAL_TERMINATION	GOBP_MITOCHONDRIAL_TRANSLATIONAL_TERMINATION	2.08267	2.79266e-07	1.90076e-05	AURKAIP1,GADD45GIP1,MRPL12,MRPS36,CHCHD1,MRPL55,MRPL21,MRPL46,MRPL2,MRPL51,MRPL27,MRPS21,MRPL16,MRPS22,MRPS12,MRPL14,MRPS24,MRPL36,MRPL34,MRPS34,MRPL57,MRPL43
3.AD/1.YC	GABA_neurons	Down	GO BP	GOBP_NUCLEOSIDE_TRIPHOSPHATE_METABOLIC_PROCESS	GOBP_NUCLEOSIDE_TRIPHOSPHATE_METABOLIC_PROCESS	1.93541	3.91984e-07	2.635e-05	PPARGC1A,LRRK2,ATP6V0C,RAN,PINK1,ATP5F1B,ATP5F1A,TMSB4X,NME1,NME2,STOML2,PKM,ANTKMT,ATP5PD,ATP5F1D,ATP5F1E,ATP5PB,ATP5MC1,ATP5MC3,ATP5PF,ATP5PO,UQCC3,ATP5MF,SMPDL3A
3.AD/1.YC	GABA_neurons	Down	GO BP	GOBP_CELLULAR_HOMEOSTASIS	GOBP_CELLULAR_HOMEOSTASIS	0.812018	6.27602e-07	4.16743e-05	PPARGC1A,BCAP31,LRRK2,CRH,EDN1,PDGFRA,SERPINF1,SOD1,TAC1,TRPC3,TYRO3,CALR,DYNLL1,TMEM203,NDFIP1,ISCU,FTH1,FTL,SLC39A6,SCARA5,ATOX1,SLC22A17,ATP6V1B2,ATP6V0C,ATP6V0B,ATP6AP1,SLC30A3,SLC39A7,ATP6V1F,ATP6V1G1,CDK5,SMAD3,TMBIM6,TXN,CD24,ATP6AP2,ADRA2A,GNG3,HTR2A,CAMK2N1,CX3CL1,SKP1,PINK1,PRDX2,CALM1,ADORA1,CARTPT,UBE2S,FIS1,APEX1,ARF1,LRP5,PRKCB,RPA3,CALM3,RACK1,ENDOG,PRDX5,PRDX1,FKBP1A,PIH1D1,THY1,C…
3.AD/1.YC	GABA_neurons	Down	GO BP	GOBP_CATECHOLAMINE_SECRETION	GOBP_CATECHOLAMINE_SECRETION	2.47524	6.46024e-07	4.23808e-05	CRH,RAB3A,VIP,ADRA2A,HTR2A,PINK1,CARTPT,SYT2,SYT4,SYT11,SNCG,STX1A,SYT5,KCNA2,CHGA,SYT13
3.AD/1.YC	GABA_neurons	Down	GO BP	GOBP_AMINE_TRANSPORT	GOBP_AMINE_TRANSPORT	1.97848	7.70506e-07	4.93577e-05	CRH,RAB3A,VIP,PER2,ARL6IP5,ADRA2A,HTR2A,RGS4,PINK1,ADORA1,CARTPT,SYT2,SYT4,CCK,SYT11,SNCG,STX1A,SYT5,KCNA2,CHGA,ARL6IP1,SYT13
3.AD/1.YC	GABA_neurons	Down	GO BP	GOBP_MITOCHONDRIAL_TRANSMEMBRANE_TRANSPORT	GOBP_MITOCHONDRIAL_TRANSMEMBRANE_TRANSPORT	1.8656	8.12118e-07	5.14184e-05	SLC25A4,SLC25A36,DNAJC19,TOMM7,VDAC1,TOMM20,ATP5F1B,ATP5F1A,MPC2,STOML2,ANTKMT,SLC25A5,SLC25A6,ATP5PD,ATP5F1D,ATP5F1E,ATP5PB,ATP5MC1,ATP5MC3,ATP5PF,ATP5PO,ATP5MF,SMDT1,SLC25A31
3.AD/1.YC	GABA_neurons	Down	GO BP	GOBP_SUBSTANTIA_NIGRA_DEVELOPMENT	GOBP_SUBSTANTIA_NIGRA_DEVELOPMENT	2.68309	8.42138e-07	5.27062e-05	FGF9,HSPA5,RAD1,DYNLL1,CALM1,CALM3,YWHAH,CALM2,CKB,COX6B1,NDUFS3,ATP5PB,ATP5PF,SYNGR3
3.AD/1.YC	GABA_neurons	Down	GO BP	GOBP_NEGATIVE_REGULATION_OF_ION_TRANSPORT	GOBP_NEGATIVE_REGULATION_OF_ION_TRANSPORT	1.26804	1.00197e-06	6.1997e-05	PARK7,LRRK2,CRH,CRHBP,SERPINE2,VIP,NDFIP1,ISCU,CDK5,TMBIM6,TXN,ARL6IP5,ERP29,ADRA2A,MDFIC,HTR2A,RGS4,THBS1,CALM1,ADORA1,CARTPT,HECW1,FIS1,PRKCB,CALM3,PPIF,VDAC1,SYT4,CALM2,INSIG1,CCN3,SYT11,ADTRP,VSNL1,CHGA,CD200,PLN,CYP51A1,HMGCR,ENHO,GSTO1,OAZ1,ERLEC1,NDFIP2,CABP1
3.AD/1.YC	GABA_neurons	Down	GO BP	GOBP_TRANSLATIONAL_TERMINATION	GOBP_TRANSLATIONAL_TERMINATION	1.8551	1.50665e-06	9.21765e-05	TRMT112,AURKAIP1,GADD45GIP1,MRPL12,MRPS36,CHCHD1,MRPL55,MRPL21,MRPL46,MRPL2,MRPL51,MRPL27,MRPS21,MRPL16,MRPS22,MRPS12,MRPL14,MRPS24,MRPL36,MRPL34,MRPS34,MRPL57,MRPL43
3.AD/1.YC	GABA_neurons	Down	GO BP	GOBP_REGULATION_OF_DNA_TEMPLATED_TRANSCRIPTION_IN_RESPONSE_TO_STRESS	GOBP_REGULATION_OF_DNA_TEMPLATED_TRANSCRIPTION_IN_RESPONSE_TO_STRESS	1.76665	2.2454e-06	0.000135815	CITED2,EGR1,HSPA5,UBB,RPS27A,TMBIM6,UBA52,UBC,PSMA3,PSMA7,PSMB1,PSMB3,PSMB6,PSMB10,PSMC3,PSMC5,PSMD2,PSMD7,PSMD8,PSMD6,TCIM,ELOC,ELOB,HIGD1A
3.AD/1.YC	GABA_neurons	Down	GO BP	GOBP_RIBONUCLEOPROTEIN_COMPLEX_BIOGENESIS	GOBP_RIBONUCLEOPROTEIN_COMPLEX_BIOGENESIS	1.0515	2.26982e-06	0.000135815	HSP90AB1,RPS6,RSL24D1,RPL3,RPL5,RPL6,RPL10,RPL11,RPL23A,RPL24,RPLP0,RRP7A,RPSA,RPS5,RPS10,RPS14,RPS15,RPS19,RPS27,RPS28,RAN,RPL26,TSR3,TRMT112,NOP10,RPL35,RPL13A,RPL10A,RPL7,RPL7A,RPL27,RPL35A,RPS2,RPS7,RPS8,RPS9,RPS16,RPS17,RPS21,RPS24,RPS25,RPL14,CELF2,PUF60,SNRPD2,SNRPE,SRSF9,LSM4,SNU13,TSR2,RPL7L1,PIH1D1,TAF9,POP7,WDR74,EIF5,GTF3A,IMP3,MRPL36,ZNF658
3.AD/1.YC	GABA_neurons	Down	GO BP	GOBP_RIBOSOMAL_SMALL_SUBUNIT_ASSEMBLY	GOBP_RIBOSOMAL_SMALL_SUBUNIT_ASSEMBLY	3.52657	2.66267e-06	0.00015759	RRP7A,RPSA,RPS5,RPS10,RPS14,RPS15,RPS19,RPS27,RPS28
3.AD/1.YC	GABA_neurons	Down	GO BP	GOBP_MITOCHONDRIAL_TRANSLATION	GOBP_MITOCHONDRIAL_TRANSLATION	1.66304	2.71205e-06	0.000158786	AURKAIP1,GADD45GIP1,MRPL12,MRPS36,NDUFA7,CHCHD1,MRPL55,MRPL21,MRPL46,MRPL2,MRPL51,MRPL27,MRPS21,MRPL16,MRPS22,MRPS12,MRPL14,MRPS24,MRPL36,MRPL34,MRPS34,TUFM,MRPL57,MRPL43,COA3,NGRN
3.AD/1.YC	GABA_neurons	Down	GO BP	GOBP_ANAPHASE_PROMOTING_COMPLEX_DEPENDENT_CATABOLIC_PROCESS	GOBP_ANAPHASE_PROMOTING_COMPLEX_DEPENDENT_CATABOLIC_PROCESS	1.9565	5.04556e-06	0.000292266	BUB1B,UBB,ANAPC11,RPS27A,UBA52,UBC,PSMA3,PSMA7,PSMB1,PSMB3,PSMB6,PSMB10,PSMC3,PSMC5,PSMD2,PSMD7,PSMD8,PSMD6,UBE2S
3.AD/1.YC	GABA_neurons	Down	GO BP	GOBP_APOPTOTIC_MITOCHONDRIAL_CHANGES	GOBP_APOPTOTIC_MITOCHONDRIAL_CHANGES	1.72006	5.66396e-06	0.000324634	SLC25A4,VDAC2,PINK1,YWHAB,FIS1,VPS35,MFF,CAMK2A,PPIF,ATP5IF1,YWHAH,CCK,CHCHD10,PRELID1,MLLT11,GHITM,MOAP1,GGCT,HRK,PDCD5,SLC25A5,TMEM14A,RHOT2
3.AD/1.YC	GABA_neurons	Down	GO BP	GOBP_CELL_CELL_SIGNALING	GOBP_CELL_CELL_SIGNALING	0.591786	6.77136e-06	0.000380103	SLC25A4,PARK7,LRRK2,CORT,CRH,CRHBP,EDN1,EGR1,FGF9,SERPINE2,PNOC,RAB3A,RBP4,TAC1,UBB,VGF,VIP,DYNLL1,KPNA2,ATP6V0C,RAB11A,PLK2,CDK5,SMAD3,NR4A2,PPM1A,RPS27A,UBA52,UBC,PER2,CD24,ATP6AP2,ADRA2A,MDFIC,HTR2A,PIN1,CAMK2N1,PSMA3,PSMA7,PSMB1,PSMB3,PSMB6,PSMB10,PSMC3,PSMC5,PSMD2,PSMD7,PSMD8,RGS4,RIT2,CX3CL1,SKP1,PINK1,TPBG,CALM1,PSMD6,RPL22,ADORA1,CARTPT,HECW1,SIAH2,GABARAP,SPEF1,TUBB2B,CDK5R1,VPS35,PPP1CA…
3.AD/1.YC	GABA_neurons	Down	GO BP	GOBP_REGULATION_OF_MITOCHONDRIAL_MEMBRANE_POTENTIAL	GOBP_REGULATION_OF_MITOCHONDRIAL_MEMBRANE_POTENTIAL	2.04414	8.025e-06	0.000445879	SLC25A36,PARK7,LRRK2,DCN,SOD1,UBB,ARL6IP5,PINK1,RACK1,ATP5IF1,CCK,TUSC2,PRELID1,STOML2,MLLT11,GOT1,MTLN
3.AD/1.YC	GABA_neurons	Down	GO BP	GOBP_INTERLEUKIN_1_MEDIATED_SIGNALING_PATHWAY	GOBP_INTERLEUKIN_1_MEDIATED_SIGNALING_PATHWAY	1.77548	8.58393e-06	0.000472116	EGR1,UBB,RPS27A,UBA52,UBC,PSMA3,PSMA7,PSMB1,PSMB3,PSMB6,PSMB10,PSMC3,PSMC5,PSMD2,PSMD7,PSMD8,SKP1,UBE2V1,PSMD6,IL1RL2,IL1RAP
3.AD/1.YC	GABA_neurons	Down	GO BP	GOBP_NEGATIVE_REGULATION_OF_ANION_TRANSPORT	GOBP_NEGATIVE_REGULATION_OF_ANION_TRANSPORT	1.37087	9.19851e-06	0.000500859	PARK7,LRRK2,CRH,CRHBP,NDFIP1,CDK5,TXN,ARL6IP5,ERP29,ADRA2A,MDFIC,RGS4,THBS1,ADORA1,CARTPT,FIS1,PRKCB,SYT4,INSIG1,CCN3,SYT11,ADTRP,VSNL1,CHGA,CD200,CYP51A1,HMGCR,ENHO,OAZ1,ERLEC1,NDFIP2,CABP1
3.AD/1.YC	GABA_neurons	Down	GO BP	GOBP_RRNA_METABOLIC_PROCESS	GOBP_RRNA_METABOLIC_PROCESS	1.28286	9.80434e-06	0.000528561	RPS6,RPL5,RPL11,RRP7A,RPS14,RPS15,RPS19,RPS27,RPS28,RPL26,TSR3,TRMT112,NOP10,RPL35,RPL10A,RPL7,RPL7A,RPL27,RPL35A,RPS2,RPS7,RPS8,RPS9,RPS16,RPS17,RPS21,RPS24,RPS25,RPL14,SNU13,TSR2,RPL7L1,PIH1D1,POP7,WDR74,IMP3,TRIR
3.AD/1.YC	GABA_neurons	Down	GO BP	GOBP_CELLULAR_RESPONSE_TO_OXYGEN_LEVELS	GOBP_CELLULAR_RESPONSE_TO_OXYGEN_LEVELS	1.28416	1.1705e-05	0.000624841	PPARGC1A,CITED2,PHB2,EDN1,EGR1,UBB,ATP6AP1,ATP6V1G1,RPS27A,TMBIM6,UBA52,UBC,PSMA3,PSMA7,PSMB1,PSMB3,PSMB6,PSMB10,PSMC3,PSMC5,PSMD2,PSMD7,PSMD8,PINK1,PSMD6,STUB1,ENDOG,PTGS2,PGK1,HYOU1,CHCHD2,ELOC,ELOB,TMEM199,HIGD1A
3.AD/1.YC	GABA_neurons	Down	GO BP	GOBP_REGULATION_OF_INTRINSIC_APOPTOTIC_SIGNALING_PATHWAY	GOBP_REGULATION_OF_INTRINSIC_APOPTOTIC_SIGNALING_PATHWAY	1.47899	1.32596e-05	0.000700954	BCAP31,PARK7,LRRK2,SOD1,UBB,VDAC2,RPL11,RPL26,TMBIM6,ERP29,PPIA,RPS3,PINK1,RPS7,FIS1,CDKN2D,PPIF,RACK1,TAF9,XBP1,SERINC3,RTKN2,CREB3,HYOU1,NDUFS3,NDUFA13,GRINA
3.AD/1.YC	GABA_neurons	Down	GO BP	GOBP_AUTOPHAGY_OF_MITOCHONDRION	GOBP_AUTOPHAGY_OF_MITOCHONDRION	1.93859	1.77045e-05	0.000926935	PPARGC1A,PARK7,PHB2,CAMKK2,PINK1,GABARAP,FIS1,MAP1LC3A,HAX1,GABARAPL2,FUNDC1,GABARAPL1,CISD2,TOMM7,VDAC1,ATG9A,ATP5IF1
3.AD/1.YC	GABA_neurons	Down	GO BP	GOBP_RESPONSE_TO_OXYGEN_LEVELS	GOBP_RESPONSE_TO_OXYGEN_LEVELS	1.03332	1.84558e-05	0.000957066	PPARGC1A,CITED2,PHB2,EDN1,EGR1,UBB,ATP6AP1,ATP6V1G1,NOX4,SMAD3,NR4A2,RPS27A,TMBIM6,UBA52,UBC,CD24,PIN1,PSMA3,PSMA7,PSMB1,PSMB3,PSMB6,PSMB10,PSMC3,PSMC5,PSMD2,PSMD7,PSMD8,PINK1,THBS1,WDR83,PSMD6,ADORA1,STUB1,ENDOG,LDHA,FUNDC1,PDPN,ATP1B1,PTGS2,DPP4,PKM,PGK1,HSP90B1,ALAS1,HYOU1,CHCHD2,ELOC,ELOB,TMEM199,HIGD1A
3.AD/1.YC	GABA_neurons	Down	GO BP	GOBP_POSITIVE_REGULATION_OF_MITOCHONDRION_ORGANIZATION	GOBP_POSITIVE_REGULATION_OF_MITOCHONDRION_ORGANIZATION	1.85462	1.96868e-05	0.00101127	PPARGC1A,PARK7,DCN,CAMKK2,PINK1,YWHAB,FIS1,VPS35,MFF,PPIF,VDAC1,ATP5IF1,YWHAH,CHCHD10,MLLT11,MOAP1,HRK,PDCD5
3.AD/1.YC	GABA_neurons	Down	GO BP	GOBP_NEUROTRANSMITTER_TRANSPORT	GOBP_NEUROTRANSMITTER_TRANSPORT	1.2858	2.07003e-05	0.00105339	PARK7,LRRK2,RAB3A,CDK5,PER2,ADRA2A,HTR2A,CALM1,PRKCB,CALM3,CAMK2A,HSPA8,CSPG5,SYT2,SYT4,SNAP25,SNAP47,SLC32A1,SYT11,STX19,ATP2A2,PDZD11,SNCG,STX1A,SYT5,TSPOAP1,CADPS2,OTOF,SLC28A2,SLC17A7,SLC17A6,SLC6A7,SV2B
3.AD/1.YC	GABA_neurons	Down	GO BP	GOBP_REGULATION_OF_CALCIUM_ION_DEPENDENT_EXOCYTOSIS	GOBP_REGULATION_OF_CALCIUM_ION_DEPENDENT_EXOCYTOSIS	2.40753	2.30689e-05	0.00113387	CDK5,ADRA2A,ARF1,SYT2,SYT4,SYT11,ATP2A2,STX1A,SYT5,CACNA1G,CDK5R2,SYT13
3.AD/1.YC	GABA_neurons	Down	GO BP	GOBP_REGULATION_OF_CELLULAR_AMINO_ACID_METABOLIC_PROCESS	GOBP_REGULATION_OF_CELLULAR_AMINO_ACID_METABOLIC_PROCESS	2.06613	2.31147e-05	0.00113387	PARK7,PSMA3,PSMA7,PSMB1,PSMB3,PSMB6,PSMB10,PSMC3,PSMC5,PSMD2,PSMD7,PSMD8,PSMD6,OAZ1,AZIN1
3.AD/1.YC	GABA_neurons	Down	GO BP	GOBP_REGULATION_OF_CATION_TRANSMEMBRANE_TRANSPORT	GOBP_REGULATION_OF_CATION_TRANSMEMBRANE_TRANSPORT	1.06698	2.33577e-05	0.00113556	PPARGC1A,PARK7,PHB2,CRH,CRHBP,ISCU,CDK5,KCNIP3,ADRA2A,NEFL,RGS4,CX3CL1,PINK1,CALM1,HECW1,ARF1,CALM3,PPIF,FKBP1A,VDAC1,SCN1B,THY1,YWHAH,CALM2,HPCA,KCNA1,ATP1B1,SCN2B,TMSB4X,CAPN1,CD63,HOMER1,CEMIP,PLN,GLRX,ANTKMT,GSTO1,PM20D1,DPP10,LRRC38,TSPAN13,KCNS1,KCNS2,NPSR1,SHISA8,JPH2
3.AD/1.YC	GABA_neurons	Down	GO BP	GOBP_REGULATION_OF_APOPTOTIC_SIGNALING_PATHWAY	GOBP_REGULATION_OF_APOPTOTIC_SIGNALING_PATHWAY	1.0567	2.55891e-05	0.00123303	BCAP31,PARK7,LRRK2,BMPR1B,SOD1,UBB,VDAC2,RPL11,RPL26,NR4A2,TMBIM6,ERP29,PPIA,STRADB,RPS3,CX3CL1,PINK1,PRDX2,THBS1,SCG2,RPS7,SIAH2,FIS1,PPP1CA,CDKN2D,PPIF,RACK1,PIH1D1,TAF9,BDNF,XBP1,PRELID1,IL7,GHITM,SERINC3,PDIA3,RTKN2,CREB3,SLC25A5,HYOU1,NDUFS3,NDUFA13,TMEM14A,GRINA,BCL2L14,ITM2C
3.AD/1.YC	GABA_neurons	Down	GO BP	GOBP_SECRETION	GOBP_SECRETION	0.588156	2.65206e-05	0.00126671	SLC25A4,ACTR2,CCT2,MAGED2,PARK7,LRRK2,CRH,CRHBP,EDN1,HSP90AB1,SERPINE2,PSAP,RAB3A,RBP4,SOD1,TAC1,TYRO3,VGF,VIP,DYNLL1,FTH1,FTL,ATP6V0C,ATP6AP1,TTN,RAB11A,CDK5,NR4A3,PER2,DYNLT1,ATP6AP2,ERP29,COPS5,SIRPA,ADRA2A,FN1,LAMTOR2,HTR2A,PPIA,CAMK2N1,PSMB1,PSMC3,PSMD2,PSMD7,PINK1,THBS1,SCG2,CALM1,PSMD6,ADORA1,CARTPT,TUBB4B,TUBA4A,PGLYRP1,ARF1,LRP5,PRKCB,CALM3,CAMK2A,HSPA8,CSPG5,SYT2,SYT4,CCK,XBP1,ECM1,CCN3…
3.AD/1.YC	GABA_neurons	Down	GO BP	GOBP_SIGNAL_RELEASE	GOBP_SIGNAL_RELEASE	0.916835	3.05552e-05	0.00144672	SLC25A4,PARK7,LRRK2,CRH,CRHBP,EDN1,RAB3A,RBP4,TAC1,VGF,VIP,DYNLL1,CDK5,PER2,ADRA2A,HTR2A,CAMK2N1,PINK1,CALM1,ADORA1,CARTPT,LRP5,PRKCB,CALM3,CAMK2A,HSPA8,CSPG5,SYT2,SYT4,CCN3,SNAP25,SNAP47,SLC32A1,SYT11,STX19,ATP2A2,PDZD11,SNCG,STX1A,SYT5,TSPOAP1,CADPS2,OTOF,KCNA2,NMU,DPP4,MPC2,PHPT1,SELENOT,VSNL1,C2CD2L,CHGA,SLC25A5,SLC25A6,ENHO,KCNS3,NNAT,SCG5,SYT13,SELENOM
3.AD/1.YC	GABA_neurons	Down	GO BP	GOBP_APOPTOTIC_SIGNALING_PATHWAY	GOBP_APOPTOTIC_SIGNALING_PATHWAY	0.841818	3.32304e-05	0.00155982	BCAP31,PARK7,LRRK2,CRH,BMPR1B,SOD1,UBB,VDAC2,RPL11,RPL26,SMAD3,NR4A2,TMBIM6,CD24,ARL6IP5,ERP29,PPIA,STRADB,RPS3,CX3CL1,PINK1,PRDX2,THBS1,YWHAB,SCG2,RPS7,ADORA1,SIAH2,GABARAP,FIS1,MFF,PPP1CA,CDKN2D,PPIF,RACK1,ATP5IF1,PIH1D1,TAF9,BDNF,YWHAH,CCK,CHCHD10,SST,XBP1,PRELID1,IL7,SELENOK,MLLT11,GHITM,MOAP1,GGCT,HRK,PDCD5,SERINC3,PDIA3,RTKN2,CREB3,SLC25A5,HYOU1,NDUFS3,NDUFA13,TFPT,TMEM14A,RHOT2,GRINA,HINT1…
3.AD/1.YC	GABA_neurons	Down	GO BP	GOBP_CHEMICAL_HOMEOSTASIS	GOBP_CHEMICAL_HOMEOSTASIS	0.626021	3.76328e-05	0.00175137	PPARGC1A,BCAP31,PARK7,LRRK2,CRH,DCN,EDN1,PDGFRA,SERPINF1,PRKAR1A,CYP26B1,RBP4,RPS6,SOD1,TAC1,TRPC3,VGF,CALR,DYNLL1,TMEM203,NDFIP1,ISCU,FTH1,FTL,SLC39A6,SCARA5,MELTF,ATOX1,SLC22A17,ATP6V1B2,ATP6V0C,ATP6V0B,ATP6AP1,SLC30A3,SLC39A7,ATP6V1F,ATP6V1G1,RAB11A,CDK5,SMAD3,TMBIM6,DYNLT1,CD24,ATP6AP2,ADRA2A,GNG3,HTR2A,MET,CAMK2N1,CX3CL1,SKP1,CALM1,ADORA1,CARTPT,STMN1,FIS1,ARF1,LRP5,PRKCB,CALM3,RACK1,ENDOG,F…
3.AD/1.YC	GABA_neurons	Down	GO BP	GOBP_MONOAMINE_TRANSPORT	GOBP_MONOAMINE_TRANSPORT	1.81694	4.35879e-05	0.00201132	PARK7,CRH,RAB3A,VIP,ADRA2A,HTR2A,PINK1,CARTPT,SYT2,SYT4,SYT11,SNCG,STX1A,SYT5,KCNA2,CHGA,SYT13
3.AD/1.YC	GABA_neurons	Down	GO BP	GOBP_ION_HOMEOSTASIS	GOBP_ION_HOMEOSTASIS	0.725575	5.04891e-05	0.00229094	BCAP31,LRRK2,CRH,DCN,EDN1,PDGFRA,SOD1,TAC1,TRPC3,CALR,TMEM203,NDFIP1,ISCU,FTH1,FTL,SLC39A6,SCARA5,MELTF,ATOX1,SLC22A17,ATP6V1B2,ATP6V0C,ATP6V0B,ATP6AP1,SLC30A3,SLC39A7,ATP6V1F,ATP6V1G1,CDK5,SMAD3,TMBIM6,CD24,ATP6AP2,GNG3,HTR2A,CAMK2N1,CX3CL1,SKP1,CALM1,ADORA1,FIS1,ARF1,PRKCB,CALM3,RACK1,FKBP1A,SCN1B,THY1,CCK,CALM2,ATP2B1,ATP5F1B,ATP2A2,TSPOAP1,KCNA1,ATP1A1,ATP1B1,SCN2B,CACNA1G,CALB1,NMU,SELENOT,L…
3.AD/1.YC	GABA_neurons	Down	GO BP	GOBP_MITOCHONDRIAL_GENE_EXPRESSION	GOBP_MITOCHONDRIAL_GENE_EXPRESSION	1.35636	5.21256e-05	0.00234565	AURKAIP1,GADD45GIP1,CHCHD10,MRPL12,MRPS36,NDUFA7,CHCHD1,MRPL55,MRPL21,MRPL46,MRPL2,MRPL51,MRPL27,MRPS21,MRPL16,MRPS22,MRPS12,MRPL14,MRPS24,MRPL36,MRPL34,MRPS34,TUFM,MRPL57,MRPL43,COA3,NGRN
3.AD/1.YC	GABA_neurons	Down	GO BP	GOBP_NEUROTRANSMITTER_SECRETION	GOBP_NEUROTRANSMITTER_SECRETION	1.3889	5.54158e-05	0.00247327	LRRK2,RAB3A,CDK5,ADRA2A,HTR2A,CALM1,PRKCB,CALM3,CAMK2A,HSPA8,CSPG5,SYT2,SYT4,SNAP25,SNAP47,SLC32A1,SYT11,STX19,ATP2A2,PDZD11,SNCG,STX1A,SYT5,TSPOAP1,CADPS2,OTOF
3.AD/1.YC	GABA_neurons	Down	GO BP	GOBP_REGULATION_OF_TRANSMEMBRANE_TRANSPORT	GOBP_REGULATION_OF_TRANSMEMBRANE_TRANSPORT	0.826636	5.69974e-05	0.00251922	PPARGC1A,PARK7,PHB2,CRH,CRHBP,EDN1,ISCU,CDK5,KCNIP3,NR4A3,PER2,ARL6IP5,ADRA2A,NEFL,RGS4,CX3CL1,PINK1,THBS1,CALM1,HECW1,ARPP19,ARF1,PRKCB,CALM3,PPIF,FKBP1A,VDAC1,SCN1B,THY1,YWHAH,CALM2,HPCA,KCNA1,KCNA2,ATP1B1,SCN2B,CACNA1G,TMSB4X,CAPN1,CD63,HOMER1,CEMIP,PLN,GLRX,ARL6IP1,ANTKMT,KCNS3,GSTO1,KCNJ4,PM20D1,OAZ1,AZIN1,OPN3,DPP10,LRRC38,KCNH4,KCNH3,KCNV1,TSPAN13,KCNF1,KCNS1,KCNS2,NPSR1,SHISA8,KCNK12,JPH2
3.AD/1.YC	GABA_neurons	Down	GO BP	GOBP_NEGATIVE_REGULATION_OF_TRANSPORT	GOBP_NEGATIVE_REGULATION_OF_TRANSPORT	0.944546	5.73707e-05	0.00251922	PARK7,LRRK2,CRH,CRHBP,EDN1,SERPINE2,VIP,NDFIP1,ISCU,CDK5,TMBIM6,TXN,ARL6IP5,ERP29,SIRPA,ADRA2A,MDFIC,HTR2A,RGS4,THBS1,CALM1,WDR54,ADORA1,CARTPT,HECW1,FIS1,VPS35,PRKCB,CALM3,PPIF,RACK1,VDAC1,SYT4,CALM2,INSIG1,CCN3,SYT11,NMU,ADTRP,VSNL1,CHGA,CD200,PLN,LRPAP1,CYP51A1,HMGCR,ENHO,GSTO1,OAZ1,ERLEC1,NDFIP2,CABP1
3.AD/1.YC	GABA_neurons	Down	GO BP	GOBP_HOMEOSTATIC_PROCESS	GOBP_HOMEOSTATIC_PROCESS	0.502463	6.79205e-05	0.00295281	PPARGC1A,BCAP31,CCT7,CCT2,PARK7,LRRK2,CRH,DCN,EDN1,EGR1,ERCC1,GPR3,HSP90AB1,MAK,PDGFRA,SERPINF1,PRKAR1A,CYP26B1,RBP4,RPS6,SOD1,TAC1,TRPC3,TYRO3,UBB,VGF,CALR,DYNLL1,TMEM203,NDFIP1,RPS14,RPS19,ISCU,FTH1,FTL,SLC39A6,SCARA5,MELTF,ATOX1,SLC22A17,ATP6V1B2,ATP6V0C,ATP6V0B,ATP6AP1,SLC30A3,SLC39A7,ATP6V1F,ATP6V1G1,RAB11A,CDK5,SMAD3,NDN,TMBIM6,TXN,NR4A3,PER2,LDB2,DYNLT1,NOP10,CD24,ATP6AP2,ADRA2A,GNG3,HTR2A…
3.AD/1.YC	GABA_neurons	Down	GO BP	GOBP_NEGATIVE_REGULATION_OF_RESPONSE_TO_REACTIVE_OXYGEN_SPECIES	GOBP_NEGATIVE_REGULATION_OF_RESPONSE_TO_REACTIVE_OXYGEN_SPECIES	3.31378	6.83294e-05	0.00295281	PARK7,LRRK2,TXN,NR4A3,MET,PINK1,RACK1
3.AD/1.YC	GABA_neurons	Down	GO BP	GOBP_REGULATION_OF_MITOCHONDRION_ORGANIZATION	GOBP_REGULATION_OF_MITOCHONDRION_ORGANIZATION	1.40092	7.19269e-05	0.0030597	PPARGC1A,PARK7,LRRK2,DCN,CAMKK2,PINK1,YWHAB,FIS1,VPS35,MFF,PPIF,HAX1,VDAC1,ATP5IF1,YWHAH,CHCHD10,PRELID1,MLLT11,GHITM,MOAP1,HRK,PDCD5,SLC25A5,TMEM14A,RHOT2
3.AD/1.YC	GABA_neurons	Down	GO BP	GOBP_RIBOSOMAL_LARGE_SUBUNIT_ASSEMBLY	GOBP_RIBOSOMAL_LARGE_SUBUNIT_ASSEMBLY	2.67798	7.9232e-05	0.00329575	RSL24D1,RPL3,RPL5,RPL6,RPL10,RPL11,RPL23A,RPL24,RPLP0
3.AD/1.YC	GABA_neurons	Down	GO BP	GOBP_EXOCYTOSIS	GOBP_EXOCYTOSIS	0.677713	7.93639e-05	0.00329575	ACTR2,CCT2,MAGED2,LRRK2,CRHBP,HSP90AB1,PSAP,RAB3A,SOD1,DYNLL1,FTH1,FTL,ATP6V0C,ATP6AP1,TTN,RAB11A,CDK5,NR4A3,DYNLT1,ATP6AP2,COPS5,SIRPA,ADRA2A,FN1,LAMTOR2,HTR2A,PPIA,PSMB1,PSMC3,PSMD2,PSMD7,THBS1,CALM1,PSMD6,TUBB4B,TUBA4A,PGLYRP1,ARF1,PRKCB,CALM3,HSPA8,CSPG5,SYT2,SYT4,ECM1,OSTF1,SNAP25,SNAP47,SYT11,STX19,ATP2A2,STX1A,SYT5,CADPS2,OTOF,CACNA1G,TMSB4X,PTGES2,NME2,VSNL1,CDK5R2,ACTR1B,PGRMC1,CHGA,ALDO…
3.AD/1.YC	GABA_neurons	Down	GO BP	GOBP_DOPAMINE_SECRETION	GOBP_DOPAMINE_SECRETION	2.4771	7.98971e-05	0.00329575	RAB3A,HTR2A,PINK1,SYT2,SYT4,SYT11,SNCG,SYT5,KCNA2,SYT13
3.AD/1.YC	GABA_neurons	Down	GO BP	GOBP_POSITIVE_REGULATION_OF_ION_TRANSPORT	GOBP_POSITIVE_REGULATION_OF_ION_TRANSPORT	0.760364	8.07466e-05	0.00330575	BCAP31,CRH,EDN1,HSP90AB1,RBP4,TAC1,TRPC3,VIP,DYNLL1,RAN,TTN,CDK5,SMAD3,PPM1A,NR4A3,ADRA2A,PPIA,CAMK2N1,CX3CL1,PINK1,YWHAB,CALM1,CD81,ADORA1,CARTPT,CDK5R1,FIS1,MFF,ARPP19,ECT2,ARF1,CALM3,CAMK2A,RACK1,UBL5,TOMM7,SCN1B,THY1,YWHAH,CCK,CALM2,HPCA,ATP2B1,STX1A,KCNA1,ATP1B1,NMU,TMSB4X,MPC2,PHPT1,SELENOT,VSNL1,C2CD2L,PRELID1,TMEM30A,PDCD5,HOMER1,CEMIP,CAMK1,MYLK,GLRX,ARL6IP1,ANTKMT,NNAT,GSTO1,FABP3,OAZ1,…
3.AD/1.YC	GABA_neurons	Down	GO BP	GOBP_TRANSITION_METAL_ION_TRANSPORT	GOBP_TRANSITION_METAL_ION_TRANSPORT	1.45882	9.3682e-05	0.00377851	TRPC3,ISCU,FTH1,FTL,SLC39A6,CBLIF,SLC39A1,SCARA5,SLC39A3,MELTF,ATOX1,SLC22A17,ATP6V1B2,ATP6V0C,ATP6V0B,ATP6AP1,TTYH1,SLC30A3,SLC39A7,ATP6V1F,MMGT1,ATP6V1G1
3.AD/1.YC	GABA_neurons	Down	GO BP	GOBP_REGULATION_OF_CELLULAR_AMINE_METABOLIC_PROCESS	GOBP_REGULATION_OF_CELLULAR_AMINE_METABOLIC_PROCESS	1.77576	9.57749e-05	0.00383452	PARK7,NR4A2,PSMA3,PSMA7,PSMB1,PSMB3,PSMB6,PSMB10,PSMC3,PSMC5,PSMD2,PSMD7,PSMD8,PSMD6,OAZ1,AZIN1
3.AD/1.YC	GABA_neurons	Down	GO BP	GOBP_MAINTENANCE_OF_LOCATION_IN_CELL	GOBP_MAINTENANCE_OF_LOCATION_IN_CELL	1.20142	0.000107667	0.00427918	PARK7,HSPA5,CALR,FTH1,FTL,SLC30A3,CDK5,TXN,HTR2A,RIT2,CX3CL1,SKP1,PINK1,CALM1,CALM3,FKBP1A,THY1,CALM2,CHCHD10,INSIG1,TMSB4X,CEMIP,PLN,HSP90B1,GSTO1,KDELR2,KDELR3,NPSR1,JPH2,MTLN,TMSB10
3.AD/1.YC	GABA_neurons	Down	GO BP	GOBP_ISOPRENOID_BIOSYNTHETIC_PROCESS	GOBP_ISOPRENOID_BIOSYNTHETIC_PROCESS	2.60016	0.000109255	0.00431084	HMGCS1,ALDH1A2,ALDH1A3,HMGCR,PMVK,FDPS,IDI1,BCO1,DHDDS
3.AD/1.YC	GABA_neurons	Down	GO BP	GOBP_MIDBRAIN_DEVELOPMENT	GOBP_MIDBRAIN_DEVELOPMENT	1.68312	0.000114948	0.0045028	FGF9,HSPA5,RAD1,DYNLL1,NR4A2,CALM1,CALM3,YWHAH,CALM2,FZD6,CKB,COX6B1,UQCRQ,NDUFS3,ATP5PB,ATP5PF,SYNGR3
3.AD/1.YC	GABA_neurons	Down	GO BP	GOBP_POSITIVE_REGULATION_OF_TRANSPORT	GOBP_POSITIVE_REGULATION_OF_TRANSPORT	0.660269	0.000127198	0.00494711	BCAP31,PARK7,LRRK2,CRH,EDN1,HSP90AB1,RAB3A,RBP4,SOD1,TAC1,TRPC3,VIP,CALR,DYNLL1,ATP6AP1,SLC30A3,RAN,TTN,CDK5,SMAD3,PPM1A,NR4A3,SIRPA,ADRA2A,PPIA,CAMK2N1,CX3CL1,PINK1,YWHAB,CALM1,CD81,ADORA1,CARTPT,CDK5R1,FIS1,MFF,ARPP19,ECT2,ARF1,CALM3,CAMK2A,RACK1,UBL5,TOMM7,ATP5IF1,SCN1B,SYT4,THY1,YWHAH,CCK,CALM2,CHCHD10,HPCA,XBP1,ATP2B1,STX1A,CADPS2,KCNA1,ATP1B1,CACNA1G,NMU,TMSB4X,MPC2,PHPT1,SELENOT,VSNL1,C2CD…
3.AD/1.YC	GABA_neurons	Down	GO BP	GOBP_CALCIUM_ION_REGULATED_EXOCYTOSIS	GOBP_CALCIUM_ION_REGULATED_EXOCYTOSIS	1.87389	0.000140527	0.00542672	RAB3A,CDK5,ADRA2A,ARF1,SYT2,SYT4,SYT11,ATP2A2,STX1A,SYT5,CADPS2,CACNA1G,CDK5R2,SYT13
3.AD/1.YC	GABA_neurons	Down	GO BP	GOBP_RIBONUCLEOPROTEIN_COMPLEX_SUBUNIT_ORGANIZATION	GOBP_RIBONUCLEOPROTEIN_COMPLEX_SUBUNIT_ORGANIZATION	1.19544	0.000150532	0.00577216	HSP90AB1,RSL24D1,RPL3,RPL5,RPL6,RPL10,RPL11,RPL23A,RPL24,RPLP0,RRP7A,RPSA,RPS5,RPS10,RPS14,RPS15,RPS19,RPS27,RPS28,RPL13A,CELF2,PUF60,SNRPD2,SNRPE,SRSF9,LSM4,PIH1D1,TAF9,EIF5,ZFAND1
3.AD/1.YC	GABA_neurons	Down	GO BP	GOBP_ANTIGEN_PROCESSING_AND_PRESENTATION_OF_EXOGENOUS_PEPTIDE_ANTIGEN_VIA_MHC_CLASS_I	GOBP_ANTIGEN_PROCESSING_AND_PRESENTATION_OF_EXOGENOUS_PEPTIDE_ANTIGEN_VIA_MHC_CLASS_I	1.7051	0.000155071	0.00590463	CALR,PSMA3,PSMA7,PSMB1,PSMB3,PSMB6,PSMB10,PSMC3,PSMC5,PSMD2,PSMD7,PSMD8,PSMD6,HLA-A,HLA-C,PDIA3
3.AD/1.YC	GABA_neurons	Down	GO BP	GOBP_ORGANELLE_DISASSEMBLY	GOBP_ORGANELLE_DISASSEMBLY	1.50566	0.000189168	0.00715293	PPARGC1A,PARK7,PHB2,CAMKK2,PINK1,GABARAP,FIS1,MAP1LC3A,HAX1,GABARAPL2,FUNDC1,GABARAPL1,CISD2,TOMM7,VDAC1,ATG9A,ATP5IF1,ZFAND1,UFC1
3.AD/1.YC	GABA_neurons	Down	GO BP	GOBP_CELL_DEATH_IN_RESPONSE_TO_HYDROGEN_PEROXIDE	GOBP_CELL_DEATH_IN_RESPONSE_TO_HYDROGEN_PEROXIDE	2.67696	0.000198902	0.00742358	PARK7,LRRK2,TXN,NR4A3,MET,PINK1,RACK1,ENDOG
3.AD/1.YC	GABA_neurons	Down	GO BP	GOBP_PEROXISOME_FISSION	GOBP_PEROXISOME_FISSION	3.99608	0.000200416	0.00742358	FIS1,MFF,PEX11A,SEC16B,PEX11B
3.AD/1.YC	GABA_neurons	Down	GO BP	GOBP_MITOCHONDRIAL_RESPIRASOME_ASSEMBLY	GOBP_MITOCHONDRIAL_RESPIRASOME_ASSEMBLY	3.99608	0.000200416	0.00742358	COX7A1,COX7A2,COX7A2L,HIGD1A,RAB5IF
3.AD/1.YC	GABA_neurons	Down	GO BP	GOBP_REGULATION_OF_TRANS_SYNAPTIC_SIGNALING	GOBP_REGULATION_OF_TRANS_SYNAPTIC_SIGNALING	0.87698	0.000202333	0.00744394	LRRK2,CRH,EDN1,SERPINE2,RAB3A,TAC1,VGF,RAB11A,PLK2,CDK5,ADRA2A,HTR2A,PSMC5,RGS4,CX3CL1,PINK1,CALM1,RPL22,ADORA1,TUBB2B,LZTS1,ARF1,PRKCB,CALM3,CAMK2A,CSPG5,ITPKA,LAMA2,NPTX1,BDNF,SYT4,YWHAH,SNAP25,SYT11,ATP2A2,SNCG,STX1A,CALB1,NMU,NSG1,HOMER1,CBLN1,CA7,SHISA8,RAB26,PHF24,GRIK3,GRM3,GRM8,NRGN
3.AD/1.YC	GABA_neurons	Down	GO BP	GOBP_REGULATION_OF_RESPONSE_TO_ENDOPLASMIC_RETICULUM_STRESS	GOBP_REGULATION_OF_RESPONSE_TO_ENDOPLASMIC_RETICULUM_STRESS	1.65983	0.000210452	0.00759676	BCAP31,TMED2,PARK7,LRRK2,HSPA5,TMBIM6,ERP29,COPS5,RACK1,XBP1,DNAJB9,SERINC3,CREB3,MANF,GRINA,TMEM33
3.AD/1.YC	GABA_neurons	Down	GO BP	GOBP_VESICLE_MEDIATED_TRANSPORT_IN_SYNAPSE	GOBP_VESICLE_MEDIATED_TRANSPORT_IN_SYNAPSE	1.18912	0.000210672	0.00759676	LRRK2,RAB3A,RAB11A,CDK5,ADRA2A,HTR2A,CALM1,CDK5R1,PRKCB,CALM3,CSPG5,SYT2,SH3GL2,HPCA,SNAP25,SNAP47,SLC32A1,SYT11,STX19,ATP2A2,SNCG,STX1A,SYT5,CADPS2,OTOF,NSG1,SLC17A7,SLC17A6,CALY
3.AD/1.YC	GABA_neurons	Down	GO BP	GOBP_NEGATIVE_REGULATION_OF_CELL_DEATH	GOBP_NEGATIVE_REGULATION_OF_CELL_DEATH	0.614049	0.000228702	0.00808627	PPARGC1A,SLC25A4,CITED2,PARK7,PHB2,LRRK2,CRH,EDN1,GPX4,HSPA5,HSP90AB1,SERPINF1,RPS6,SOD1,TYRO3,UBB,VDAC2,VIP,RPL10,PLK2,CDK5,FHL2,SMAD3,NR4A2,RARB,RPS27A,TMBIM6,TXN,UBA52,UBC,NR4A3,SPRY2,DYNLT1,COPS5,SH3RF2,NENF,ARAF,MET,NEFL,PIN1,PPIA,STRADB,PSMC5,CX3CL1,PINK1,PRDX2,THBS1,SCG2,RPS3A,ADORA1,SIAH2,CFL1,SPEF1,VPS35,CDKN2D,PPIF,RACK1,PRDX5,HAX1,VDAC1,PIH1D1,TAF9,PDPN,BDNF,LAMTOR5,XBP1,CCN3,ST3GAL1,F…
3.AD/1.YC	GABA_neurons	Down	GO BP	GOBP_REGULATION_OF_INTRACELLULAR_PROTEIN_TRANSPORT	GOBP_REGULATION_OF_INTRACELLULAR_PROTEIN_TRANSPORT	1.06375	0.000258094	0.00906659	BCAP31,PARK7,LRRK2,HSP90AB1,RAN,CDK5,SMAD3,PPM1A,TXN,MDFIC,PINK1,YWHAB,CD81,CDK5R1,FIS1,MFF,ECT2,UBL5,HAX1,TOMM7,ATP5IF1,YWHAH,HPCA,INSIG1,TMEM30A,PDCD5,CEMIP,CAMK1,PTPN14,OAZ1,ERLEC1,ZFAND1,SEC16B,CABP1
3.AD/1.YC	GABA_neurons	Down	GO BP	GOBP_CELLULAR_ION_HOMEOSTASIS	GOBP_CELLULAR_ION_HOMEOSTASIS	0.698198	0.000305519	0.0105959	BCAP31,LRRK2,EDN1,PDGFRA,SOD1,TAC1,TRPC3,CALR,TMEM203,NDFIP1,ISCU,FTH1,FTL,SLC39A6,SCARA5,ATOX1,SLC22A17,ATP6V1B2,ATP6V0C,ATP6V0B,ATP6AP1,SLC30A3,SLC39A7,ATP6V1F,ATP6V1G1,CDK5,SMAD3,TMBIM6,CD24,ATP6AP2,GNG3,HTR2A,CX3CL1,SKP1,CALM1,ADORA1,FIS1,ARF1,PRKCB,CALM3,FKBP1A,THY1,CALM2,ATP2B1,ATP5F1B,ATP2A2,TSPOAP1,ATP1A1,ATP1B1,CALB1,NMU,SELENOT,LPAR6,SCO2,STOML2,SELENOK,CEMIP,PLN,HSP90B1,GPR17,GSTO1,GOT…
3.AD/1.YC	GABA_neurons	Down	GO BP	GOBP_POSITIVE_REGULATION_OF_ESTABLISHMENT_OF_PROTEIN_LOCALIZATION	GOBP_POSITIVE_REGULATION_OF_ESTABLISHMENT_OF_PROTEIN_LOCALIZATION	0.941157	0.000317046	0.010926	BCAP31,CCT7,CCT2,CRH,HSP90AB1,RBP4,DYNLL1,RAN,TTN,CDK5,SMAD3,PPM1A,PPIA,CAMK2N1,PINK1,YWHAB,CD81,CDK5R1,FIS1,MFF,ECT2,ARF1,RACK1,UBL5,TOMM7,YWHAH,HPCA,NMU,MPC2,PHPT1,VSNL1,C2CD2L,TMEM30A,PDCD5,CEMIP,CAMK1,NNAT,OAZ1,CCT6A,VPS28,ZFAND1,SEC16B
3.AD/1.YC	GABA_neurons	Down	GO BP	GOBP_ANTIGEN_PROCESSING_AND_PRESENTATION_OF_PEPTIDE_ANTIGEN	GOBP_ANTIGEN_PROCESSING_AND_PRESENTATION_OF_PEPTIDE_ANTIGEN	1.16423	0.000326886	0.0111943	BCAP31,CALR,DYNLL1,PSMA3,PSMA7,PSMB1,PSMB3,PSMB6,PSMB10,PSMC3,PSMC5,PSMD2,PSMD7,PSMD8,PSMD6,DCTN3,ARF1,SH3GL2,AP2M1,AP2S1,ACTR1B,CTSL,HLA-A,HLA-C,PDIA3,AP1S1,RILP,CTSF
3.AD/1.YC	GABA_neurons	Down	GO BP	GOBP_NEGATIVE_REGULATION_OF_RESPONSE_TO_OXIDATIVE_STRESS	GOBP_NEGATIVE_REGULATION_OF_RESPONSE_TO_OXIDATIVE_STRESS	2.78293	0.000357359	0.0121614	PARK7,LRRK2,TXN,NR4A3,MET,PINK1,RACK1
3.AD/1.YC	GABA_neurons	Down	GO BP	GOBP_REGULATION_OF_TRANSPORTER_ACTIVITY	GOBP_REGULATION_OF_TRANSPORTER_ACTIVITY	1.00621	0.000370265	0.01234	PPARGC1A,PARK7,PHB2,CRH,CRHBP,NDFIP1,CDK5,ADRA2A,NEFL,PINK1,CALM1,HECW1,CALM3,PPIF,FKBP1A,SCN1B,YWHAH,CALM2,HPCA,KCNA1,ATP1B1,SCN2B,TMSB4X,CAPN1,HOMER1,PLN,GLRX,ANTKMT,GSTO1,PM20D1,NDFIP2,LRRC38,KCNS1,KCNS2,SHISA8,JPH2,SYNGR3
3.AD/1.YC	GABA_neurons	Down	GO BP	GOBP_NEGATIVE_REGULATION_OF_AMINE_TRANSPORT	GOBP_NEGATIVE_REGULATION_OF_AMINE_TRANSPORT	2.50683	0.000370596	0.01234	CRH,ARL6IP5,ADRA2A,RGS4,ADORA1,SYT4,SYT11,CHGA
3.AD/1.YC	GABA_neurons	Down	GO BP	GOBP_ANION_TRANSMEMBRANE_TRANSPORT	GOBP_ANION_TRANSMEMBRANE_TRANSPORT	0.753027	0.000371673	0.01234	SLC25A4,SLC25A36,DNAJC19,EDN1,HSPA5,VDAC2,TTYH1,NR4A3,PER2,ARL6IP5,RGS4,THBS1,ARPP19,PRKCB,HSPA8,TOMM7,VDAC1,PDPN,SLC26A5,TOMM20,SLC32A1,MPC2,SLC2A3,SLC28A2,ARL6IP1,SLC25A5,SLC25A6,SLC22A6,PRAF2,SLC38A11,SLC36A1,SLC17A7,SLC17A6,SLC6A7,SLC7A4,OAZ1,AZIN1,OPN3,SLC25A14,ADAMTS8,ZFAND2B,SEC61G,PEX10,TRAM2,SLC22A24,SLC13A4,SLC25A45,SLC25A3,SLC12A5,SLC12A4,SLC20A1,MFSD4B,GABRD,SLC26A4,ANO3,SLC25A31,SLC3…
3.AD/1.YC	GABA_neurons	Down	GO BP	GOBP_PROTEIN_INSERTION_INTO_ER_MEMBRANE_BY_STOP_TRANSFER_MEMBRANE_ANCHOR_SEQUENCE	GOBP_PROTEIN_INSERTION_INTO_ER_MEMBRANE_BY_STOP_TRANSFER_MEMBRANE_ANCHOR_SEQUENCE	3.67417	0.00037676	0.0124331	MMGT1,EMC10,EMC4,EMC7,EMC6
3.AD/1.YC	GABA_neurons	Down	GO BP	GOBP_RELEASE_OF_CYTOCHROME_C_FROM_MITOCHONDRIA	GOBP_RELEASE_OF_CYTOCHROME_C_FROM_MITOCHONDRIA	1.87213	0.000414582	0.0135988	PINK1,FIS1,MFF,PPIF,CCK,PRELID1,MLLT11,GHITM,MOAP1,GGCT,HRK,PDCD5
3.AD/1.YC	GABA_neurons	Down	GO BP	GOBP_REGULATION_OF_PROTEIN_LOCALIZATION	GOBP_REGULATION_OF_PROTEIN_LOCALIZATION	0.617906	0.000421186	0.0137327	SLC25A4,BCAP31,CCT7,CCT2,PARK7,LRRK2,CRH,HSP90AB1,RBP4,VIP,DYNLL1,NDFIP1,RAN,TTN,RAB11A,CDK5,SMAD3,PPM1A,TXN,PER2,ERP29,ADRA2A,MDFIC,PIN1,PPIA,CAMK2N1,PINK1,YWHAB,CD81,CARTPT,CDK5R1,FIS1,MFF,ECT2,ARF1,LRP5,RACK1,HSPA8,UBL5,FKBP1A,HAX1,TOMM7,ATP5IF1,EPB41,BDNF,YWHAH,LAMTOR5,HPCA,INSIG1,CCN3,SNAP25,SYT11,STX1A,NMU,DPP4,ADTRP,MPC2,PHPT1,VSNL1,C2CD2L,ARHGDIG,AP2M1,CHGA,CD200,RAB14,TMEM30A,SELENOK,PDC…
3.AD/1.YC	GABA_neurons	Down	GO BP	GOBP_NEGATIVE_REGULATION_OF_ESTABLISHMENT_OF_PROTEIN_LOCALIZATION	GOBP_NEGATIVE_REGULATION_OF_ESTABLISHMENT_OF_PROTEIN_LOCALIZATION	1.40607	0.000425388	0.0137871	PARK7,LRRK2,NDFIP1,CDK5,TXN,ERP29,ADRA2A,MDFIC,INSIG1,CCN3,ADTRP,VSNL1,CHGA,CD200,CYP51A1,HMGCR,ENHO,ERLEC1,NDFIP2,CABP1
3.AD/1.YC	GABA_neurons	Down	GO BP	GOBP_SYNAPTIC_VESICLE_EXOCYTOSIS	GOBP_SYNAPTIC_VESICLE_EXOCYTOSIS	1.44326	0.000430323	0.0138645	LRRK2,RAB3A,CDK5,ADRA2A,HTR2A,CALM1,PRKCB,CALM3,CSPG5,SYT2,SNAP25,SNAP47,STX19,ATP2A2,STX1A,SYT5,CADPS2,OTOF
3.AD/1.YC	GABA_neurons	Down	GO BP	GOBP_DOPAMINE_TRANSPORT	GOBP_DOPAMINE_TRANSPORT	1.96818	0.00044598	0.0142845	PARK7,RAB3A,HTR2A,PINK1,SYT2,SYT4,SYT11,SNCG,SYT5,KCNA2,SYT13
3.AD/1.YC	GABA_neurons	Down	GO BP	GOBP_REGULATION_OF_PROTEIN_MODIFICATION_BY_SMALL_PROTEIN_CONJUGATION_OR_REMOVAL	GOBP_REGULATION_OF_PROTEIN_MODIFICATION_BY_SMALL_PROTEIN_CONJUGATION_OR_REMOVAL	1.04517	0.000486327	0.0153956	PARK7,LRRK2,EGR1,HSPA5,HSP90AB1,UBB,NDFIP1,RPL5,RPL11,CDK5,PER2,RPL23,SPRY2,SH3RF2,PIN1,PPIA,RPS3,SKP1,PINK1,RPS2,RPS7,STUB1,UBE2S,SIAH2,FKBP1A,PRICKLE1,PRR7,NSMCE3,VPS28,NDFIP2,CAMLG,COPS9
3.AD/1.YC	GABA_neurons	Down	GO BP	GOBP_NEGATIVE_REGULATION_OF_APOPTOTIC_SIGNALING_PATHWAY	GOBP_NEGATIVE_REGULATION_OF_APOPTOTIC_SIGNALING_PATHWAY	1.0635	0.000523036	0.016462	PARK7,LRRK2,VDAC2,NR4A2,TMBIM6,PPIA,STRADB,CX3CL1,PINK1,PRDX2,THBS1,SCG2,SIAH2,CDKN2D,PPIF,PIH1D1,TAF9,BDNF,XBP1,PRELID1,IL7,GHITM,RTKN2,CREB3,SLC25A5,HYOU1,NDUFS3,NDUFA13,TMEM14A,GRINA
3.AD/1.YC	GABA_neurons	Down	GO BP	GOBP_MEMBRANE_ORGANIZATION	GOBP_MEMBRANE_ORGANIZATION	0.580232	0.000572963	0.0178273	ACTR2,TMED2,RAB3A,SOD1,UBB,VDAC2,CALR,MMGT1,RPS27A,UBA52,UBC,DYNLT1,CD24,EMC10,PPIA,PINK1,THBS1,YWHAB,CALM1,ARF1,PRKCB,CALM3,CAMK2A,BANF1,PPIF,HSPA8,ATP5IF1,SYT2,RHOBTB2,SH3GL2,SYT4,YWHAH,RHOBTB1,ALKBH4,CHCHD10,INSIG1,ATP5F1B,SNAP25,SNAP47,SYT11,STX19,ATP2A2,STX1A,OTOF,ATP1B1,ATP5F1A,C2CD2L,AP2M1,AP2S1,ACTG1,CTSL,GCA,PRELID1,TRBC2,TMEM30A,CD59,GHITM,MOAP1,PDCD5,NAXE,ARL6IP1,RILP,F5,SLC25A5,RUBCNL…
3.AD/1.YC	GABA_neurons	Down	GO BP	GOBP_MAINTENANCE_OF_PROTEIN_LOCATION_IN_CELL	GOBP_MAINTENANCE_OF_PROTEIN_LOCATION_IN_CELL	1.70788	0.000609464	0.0188553	PARK7,HSPA5,CDK5,TXN,RIT2,SKP1,PINK1,CHCHD10,INSIG1,TMSB4X,KDELR2,KDELR3,TMSB10
3.AD/1.YC	GABA_neurons	Down	GO BP	GOBP_RESPONSE_TO_ABIOTIC_STIMULUS	GOBP_RESPONSE_TO_ABIOTIC_STIMULUS	0.525559	0.000622172	0.0190322	PPARGC1A,CITED2,PHB2,DCN,EDN1,EGR1,ERCC1,HMGCS1,HSPA5,HSP90AB1,SERPINF1,SERPINE2,RAD1,RAB3A,SOD1,TAC1,TRPC3,UBB,VGF,SCARA5,ATP6AP1,ATP6V1G1,TTN,TOPBP1,BABAM1,RPL26,CDK5,NOX4,HSBP1,SMAD3,MEIS2,NR4A2,PER1,RPS27A,TMBIM6,TXN,UBA52,UBC,BHLHE40,PER2,CD24,HTR2A,PIN1,PSMA3,PSMA7,PSMB1,PSMB3,PSMB6,PSMB10,PSMC3,PSMC5,PSMD2,PSMD7,PSMD8,NDRG4,PINK1,THBS1,CALM1,WDR83,PSMD6,ADORA1,STUB1,FBXL12,PPP1CA,CDKN2D,EC…
3.AD/1.YC	GABA_neurons	Down	GO BP	GOBP_ANTIGEN_PROCESSING_AND_PRESENTATION_OF_PEPTIDE_ANTIGEN_VIA_MHC_CLASS_I	GOBP_ANTIGEN_PROCESSING_AND_PRESENTATION_OF_PEPTIDE_ANTIGEN_VIA_MHC_CLASS_I	1.42951	0.000670755	0.0204037	BCAP31,CALR,PSMA3,PSMA7,PSMB1,PSMB3,PSMB6,PSMB10,PSMC3,PSMC5,PSMD2,PSMD7,PSMD8,PSMD6,HLA-A,HLA-C,PDIA3
3.AD/1.YC	GABA_neurons	Down	GO BP	GOBP_PROTEASOMAL_UBIQUITIN_INDEPENDENT_PROTEIN_CATABOLIC_PROCESS	GOBP_PROTEASOMAL_UBIQUITIN_INDEPENDENT_PROTEIN_CATABOLIC_PROCESS	2.57615	0.000691017	0.0207092	PSMA3,PSMA7,PSMB1,PSMB3,PSMB6,PSMB10,ENC1
3.AD/1.YC	GABA_neurons	Down	GO BP	GOBP_MITOCHONDRIAL_DEPOLARIZATION	GOBP_MITOCHONDRIAL_DEPOLARIZATION	2.57615	0.000691017	0.0207092	LRRK2,DCN,RACK1,ATP5IF1,CCK,MLLT11,GOT1
3.AD/1.YC	GABA_neurons	Down	GO BP	GOBP_NADH_METABOLIC_PROCESS	GOBP_NADH_METABOLIC_PROCESS	2.00007	0.000696013	0.0207092	GAPDH,ALDOC,PGAM1,PKM,PGK1,ENO2,MDH1,MDH2,PFKM,TPI1
3.AD/1.YC	GABA_neurons	Down	GO BP	GOBP_MAINTENANCE_OF_PROTEIN_LOCALIZATION_IN_ORGANELLE	GOBP_MAINTENANCE_OF_PROTEIN_LOCALIZATION_IN_ORGANELLE	2.00007	0.000696013	0.0207092	PARK7,HSPA5,CDK5,TXN,SKP1,PINK1,CHCHD10,INSIG1,KDELR2,KDELR3
3.AD/1.YC	GABA_neurons	Down	GO BP	GOBP_GLUCOSE_CATABOLIC_PROCESS	GOBP_GLUCOSE_CATABOLIC_PROCESS	2.14684	0.000702538	0.0207898	GAPDH,LRP5,ALDOC,PGAM1,PKM,PGK1,ENO2,PFKM,TPI1
3.AD/1.YC	GABA_neurons	Down	GO BP	GOBP_REGULATION_OF_NEUROTRANSMITTER_LEVELS	GOBP_REGULATION_OF_NEUROTRANSMITTER_LEVELS	1.05337	0.000716404	0.0210855	PARK7,LRRK2,RAB3A,CDK5,PER2,ADRA2A,HTR2A,CALM1,PRKCB,CALM3,CAMK2A,HSPA8,CSPG5,SYT2,SYT4,SNAP25,SNAP47,SLC32A1,SYT11,STX19,ATP2A2,PAH,PDZD11,SNCG,STX1A,SYT5,TSPOAP1,CADPS2,OTOF
3.AD/1.YC	GABA_neurons	Down	GO BP	GOBP_NEGATIVE_REGULATION_OF_INTRINSIC_APOPTOTIC_SIGNALING_PATHWAY	GOBP_NEGATIVE_REGULATION_OF_INTRINSIC_APOPTOTIC_SIGNALING_PATHWAY	1.47185	0.000724219	0.0212009	PARK7,LRRK2,VDAC2,TMBIM6,PPIA,PINK1,CDKN2D,PPIF,TAF9,XBP1,RTKN2,CREB3,HYOU1,NDUFS3,NDUFA13,GRINA
3.AD/1.YC	GABA_neurons	Down	GO BP	GOBP_NIK_NF_KAPPAB_SIGNALING	GOBP_NIK_NF_KAPPAB_SIGNALING	1.16981	0.000786858	0.0227896	PHB2,EDN1,CALR,PPM1A,PSMA3,PSMA7,PSMB1,PSMB3,PSMB6,PSMB10,PSMC3,PSMC5,PSMD2,PSMD7,PSMD8,RPS3,SKP1,PSMD6,ILK,CCN3,TMSB4X,TCIM,C1QTNF4,LRRC19,RTKN2
3.AD/1.YC	GABA_neurons	Down	GO BP	GOBP_REGULATION_OF_HEMATOPOIETIC_STEM_CELL_DIFFERENTIATION	GOBP_REGULATION_OF_HEMATOPOIETIC_STEM_CELL_DIFFERENTIATION	1.58071	0.000808614	0.0232958	PSMA3,PSMA7,PSMB1,PSMB3,PSMB6,PSMB10,PSMC3,PSMC5,PSMD2,PSMD7,PSMD8,PSMD6,OCIAD2,OCIAD1
3.AD/1.YC	GABA_neurons	Down	GO BP	GOBP_GLYCOLYTIC_PROCESS_THROUGH_FRUCTOSE_6_PHOSPHATE	GOBP_GLYCOLYTIC_PROCESS_THROUGH_FRUCTOSE_6_PHOSPHATE	2.28425	0.000836841	0.0238565	GAPDH,ALDOC,PGAM1,PKM,PGK1,ENO2,PFKM,TPI1
3.AD/1.YC	GABA_neurons	Down	GO BP	GOBP_REGULATION_OF_RESPONSE_TO_REACTIVE_OXYGEN_SPECIES	GOBP_REGULATION_OF_RESPONSE_TO_REACTIVE_OXYGEN_SPECIES	2.28425	0.000836841	0.0238565	PARK7,LRRK2,TXN,NR4A3,MET,PINK1,RACK1,ENDOG
3.AD/1.YC	GABA_neurons	Down	GO BP	GOBP_CYTOCHROME_COMPLEX_ASSEMBLY	GOBP_CYTOCHROME_COMPLEX_ASSEMBLY	2.09234	0.000876895	0.0248682	SCO2,SURF1,UQCRFS1,UQCC3,COA3,COX18,PET100,COX14,HCCS
3.AD/1.YC	GABA_neurons	Down	GO BP	GOBP_PURINE_CONTAINING_COMPOUND_BIOSYNTHETIC_PROCESS	GOBP_PURINE_CONTAINING_COMPOUND_BIOSYNTHETIC_PROCESS	1.0594	0.000883585	0.0249281	PPARGC1A,ACSL6,ATP6V0C,PINK1,HPCA,PAPSS2,ATP5F1B,ATP5F1A,TMSB4X,MPC2,NME1,NME2,STOML2,PKM,ANTKMT,PDHB,PDP1,ATP5PD,ATP5F1D,ATP5F1E,ATP5PB,ATP5MC1,ATP5MC3,ATP5PF,ATP5PO,UQCC3,ATP5MF,GUK1
3.AD/1.YC	GABA_neurons	Down	GO BP	GOBP_PROTEIN_LOCALIZATION_TO_MITOCHONDRION	GOBP_PROTEIN_LOCALIZATION_TO_MITOCHONDRION	1.2009	0.00101282	0.0281367	BCAP31,LRRK2,DNAJC19,PINK1,YWHAB,CALM1,FIS1,MFF,CALM3,UBL5,HAX1,TOMM7,ATP5IF1,YWHAH,TOMM20,MOAP1,PDCD5,SLC25A6,NDUFA13,TIMM8B,TOMM5,COX18
3.AD/1.YC	GABA_neurons	Down	GO BP	GOBP_NEGATIVE_REGULATION_OF_RESPONSE_TO_ENDOPLASMIC_RETICULUM_STRESS	GOBP_NEGATIVE_REGULATION_OF_RESPONSE_TO_ENDOPLASMIC_RETICULUM_STRESS	1.91222	0.0010274	0.0283969	TMED2,PARK7,LRRK2,HSPA5,TMBIM6,RACK1,XBP1,DNAJB9,CREB3,GRINA
3.AD/1.YC	GABA_neurons	Down	GO BP	GOBP_DICARBOXYLIC_ACID_TRANSPORT	GOBP_DICARBOXYLIC_ACID_TRANSPORT	1.41429	0.00104578	0.0287338	RAB3A,PER2,ARL6IP5,ADORA1,SLC26A5,CCK,SNAP25,STX1A,TSPOAP1,ARL6IP1,SLC22A6,PRAF2,SLC17A7,SLC17A6,SLC25A14,SLC26A4
3.AD/1.YC	GABA_neurons	Down	GO BP	GOBP_METAL_ION_HOMEOSTASIS	GOBP_METAL_ION_HOMEOSTASIS	0.653304	0.00105014	0.0287338	BCAP31,EDN1,PDGFRA,SOD1,TAC1,TRPC3,CALR,TMEM203,NDFIP1,ISCU,FTH1,FTL,SLC39A6,SCARA5,MELTF,ATOX1,SLC22A17,ATP6AP1,SLC30A3,SLC39A7,ATP6V1G1,CDK5,SMAD3,TMBIM6,CD24,GNG3,HTR2A,CAMK2N1,CX3CL1,SKP1,CALM1,ADORA1,FIS1,ARF1,PRKCB,CALM3,FKBP1A,THY1,CALM2,ATP2B1,ATP2A2,TSPOAP1,KCNA1,ATP1A1,ATP1B1,CALB1,NMU,SELENOT,LPAR6,SCO2,STOML2,SELENOK,FAM20A,CEMIP,PLN,HSP90B1,GPR17,GSTO1,GOT1,NEDD8,NPSR1,JPH2,SLC12A5,S…
3.AD/1.YC	GABA_neurons	Down	GO BP	GOBP_REGULATION_OF_ENDOPLASMIC_RETICULUM_STRESS_INDUCED_INTRINSIC_APOPTOTIC_SIGNALING_PATHWAY	GOBP_REGULATION_OF_ENDOPLASMIC_RETICULUM_STRESS_INDUCED_INTRINSIC_APOPTOTIC_SIGNALING_PATHWAY	2.21706	0.00106908	0.0289609	PARK7,LRRK2,TMBIM6,ERP29,XBP1,SERINC3,CREB3,GRINA
3.AD/1.YC	GABA_neurons	Down	GO BP	GOBP_CELLULAR_COMPONENT_DISASSEMBLY	GOBP_CELLULAR_COMPONENT_DISASSEMBLY	0.691364	0.00107885	0.0290809	PPARGC1A,PARK7,PHB2,MELTF,CDK5,RPL23,TRMT112,CAMKK2,CX3CL1,PINK1,CFL1,GABARAP,SPEF1,STMN1,STMN4,FIS1,PPP1CA,AURKAIP1,PRKCB,GADD45GIP1,ENDOG,MAP1LC3A,HSPA8,HAX1,GABARAPL2,FUNDC1,GABARAPL1,CISD2,TOMM7,VDAC1,ATG9A,ATP5IF1,PDPN,MRPL12,DPP4,CTSL,CAPN1,MICAL2,RUBCNL,MRPS36,HMGA1,CHCHD1,MRPL55,MRPL21,MRPL46,MRPL2,MRPL51,MRPL27,MRPS21,MRPL16,MRPS22,MRPS12,MRPL14,MRPS24,MRPL36,MRPL34,MRPS34,MRPL57,MRPL43,…
3.AD/1.YC	GABA_neurons	Down	GO BP	GOBP_NEGATIVE_REGULATION_OF_PEPTIDE_SECRETION	GOBP_NEGATIVE_REGULATION_OF_PEPTIDE_SECRETION	1.59859	0.00110961	0.0296169	CRH,CRHBP,ERP29,ADRA2A,CARTPT,CCN3,ADTRP,VSNL1,CHGA,CD200,CYP51A1,HMGCR,ENHO
3.AD/1.YC	GABA_neurons	Down	GO BP	GOBP_CELLULAR_RESPONSE_TO_CARBOHYDRATE_STIMULUS	GOBP_CELLULAR_RESPONSE_TO_CARBOHYDRATE_STIMULUS	1.25593	0.00112414	0.0298583	PPARGC1A,CRH,SERPINF1,DYNLL1,ADRA2A,CAMK2N1,LRP5,PRKCB,RACK1,ENDOG,PIH1D1,XBP1,GJB6,MPC2,PHPT1,LGALS1,NME1,NME2,SELENOT,VSNL1,C2CD2L
3.AD/1.YC	GABA_neurons	Down	GO BP	GOBP_POSITIVE_REGULATION_OF_ANION_TRANSPORT	GOBP_POSITIVE_REGULATION_OF_ANION_TRANSPORT	0.735888	0.0011531	0.0304788	BCAP31,CRH,EDN1,HSP90AB1,RBP4,TAC1,VIP,DYNLL1,RAN,TTN,CDK5,SMAD3,PPM1A,NR4A3,PPIA,CAMK2N1,PINK1,YWHAB,CD81,ADORA1,CARTPT,CDK5R1,FIS1,MFF,ARPP19,ECT2,ARF1,RACK1,UBL5,TOMM7,YWHAH,CCK,HPCA,STX1A,NMU,MPC2,PHPT1,SELENOT,VSNL1,C2CD2L,PRELID1,TMEM30A,PDCD5,CEMIP,CAMK1,ARL6IP1,NNAT,FABP3,OAZ1,AZIN1,OPN3,VPS28,ZFAND1,SEC16B
3.AD/1.YC	GABA_neurons	Down	GO BP	GOBP_IRON_ION_TRANSPORT	GOBP_IRON_ION_TRANSPORT	1.51016	0.00121442	0.031791	ISCU,FTH1,FTL,SCARA5,MELTF,SLC22A17,ATP6V1B2,ATP6V0C,ATP6V0B,ATP6AP1,TTYH1,ATP6V1F,MMGT1,ATP6V1G1
3.AD/1.YC	GABA_neurons	Down	GO BP	GOBP_NEGATIVE_REGULATION_OF_ENDOPLASMIC_RETICULUM_STRESS_INDUCED_INTRINSIC_APOPTOTIC_SIGNALING_PATHWAY	GOBP_NEGATIVE_REGULATION_OF_ENDOPLASMIC_RETICULUM_STRESS_INDUCED_INTRINSIC_APOPTOTIC_SIGNALING_PATHWAY	2.67492	0.00128039	0.0333576	PARK7,LRRK2,TMBIM6,XBP1,CREB3,GRINA
3.AD/1.YC	GABA_neurons	Down	GO BP	GOBP_REGULATION_OF_UBIQUITIN_PROTEIN_TRANSFERASE_ACTIVITY	GOBP_REGULATION_OF_UBIQUITIN_PROTEIN_TRANSFERASE_ACTIVITY	1.7454	0.00130526	0.0338436	PARK7,RPL5,RPL11,RPL23,PIN1,SKP1,PINK1,RPS2,RPS7,STUB1,UBE2S
3.AD/1.YC	GABA_neurons	Down	GO BP	GOBP_MONOSACCHARIDE_CATABOLIC_PROCESS	GOBP_MONOSACCHARIDE_CATABOLIC_PROCESS	1.64911	0.00131296	0.0338819	GAPDH,LRP5,ALDH1A1,ALDOC,PGAM1,PKM,PGK1,ENO2,GALT,PFKM,RPE,TPI1
3.AD/1.YC	GABA_neurons	Down	GO BP	GOBP_REGULATION_OF_SECRETION	GOBP_REGULATION_OF_SECRETION	0.651333	0.00134006	0.0344179	SLC25A4,LRRK2,CRH,CRHBP,EDN1,RAB3A,RBP4,TAC1,VIP,DYNLL1,ATP6AP1,TTN,CDK5,PER2,ERP29,ADRA2A,HTR2A,PPIA,CAMK2N1,PINK1,CALM1,ADORA1,CARTPT,ARF1,LRP5,PRKCB,CALM3,CAMK2A,CSPG5,SYT2,SYT4,CCK,XBP1,CCN3,SNAP25,SYT11,ATP2A2,SNCG,STX1A,SYT5,CADPS2,KCNA2,CACNA1G,NMU,DPP4,ADTRP,MPC2,PHPT1,SELENOT,VSNL1,C2CD2L,CDK5R2,CHGA,CD200,CYP51A1,SLC25A5,SLC25A6,HMGCR,ENHO,KCNS3,NNAT,SCG5,SYT13,LGI3,RAB26
3.AD/1.YC	GABA_neurons	Down	GO BP	GOBP_CELL_COMMUNICATION_BY_ELECTRICAL_COUPLING	GOBP_CELL_COMMUNICATION_BY_ELECTRICAL_COUPLING	2.15286	0.00135003	0.0345114	CALM1,CALM3,CALM2,GJC1,KCNA1,ATP1A1,ATP1B1,GJB6
3.AD/1.YC	GABA_neurons	Down	GO BP	GOBP_POSITIVE_REGULATION_OF_SIGNALING	GOBP_POSITIVE_REGULATION_OF_SIGNALING	0.424592	0.00147893	0.0376297	BCAP31,CITED2,PARK7,PHB2,LRRK2,CRH,DCN,EDN1,FGF9,FSHR,HSP90AB1,PDGFRA,SERPINE2,RBP4,BMPR1B,SOD1,TAC1,UBB,CALR,DYNLL1,NDFIP1,RPL11,ATP6V0C,ATP6AP1,PLK2,RPL26,CDK5,SMAD3,PPM1A,RPS27A,TXN,UBA52,UBC,RPL23,SPRY2,DYNLT1,CD24,RASGRP1,ATP6AP2,ARL6IP5,ERP29,ADRA2A,SH3RF2,SPRED1,DDT,MTURN,FN1,GNG3,EMC10,RELL2,LAMTOR2,NENF,MDFIC,HTR2A,MET,PIN1,PPIA,CAMK2N1,PSMA3,PSMA7,PSMB1,PSMB3,PSMB6,PSMB10,PSMC3,PSMC5,PS…
3.AD/1.YC	GABA_neurons	Down	GO BP	GOBP_PEPTIDE_SECRETION	GOBP_PEPTIDE_SECRETION	0.785593	0.001488	0.0376844	SLC25A4,PARK7,CRH,CRHBP,EDN1,RAB3A,RBP4,VGF,VIP,DYNLL1,TTN,PER2,ERP29,ADRA2A,PPIA,CAMK2N1,SCG2,ADORA1,CARTPT,ARF1,LRP5,CCN3,SNAP25,SNCG,STX1A,NMU,DPP4,ADTRP,MPC2,PHPT1,SELENOT,VSNL1,C2CD2L,CHGA,CD200,CBLN4,CYP51A1,SLC25A5,SLC25A6,HMGCR,ENHO,ARL4D,KCNS3,NNAT,NAGPA,CBLN1
3.AD/1.YC	GABA_neurons	Down	GO BP	GOBP_CELLULAR_GLUCOSE_HOMEOSTASIS	GOBP_CELLULAR_GLUCOSE_HOMEOSTASIS	1.18069	0.00150946	0.0380509	PPARGC1A,CRH,SERPINF1,DYNLL1,ADRA2A,CAMK2N1,CARTPT,LRP5,RACK1,ENDOG,PIH1D1,XBP1,GJB6,MPC2,PHPT1,LGALS1,NME1,NME2,SELENOT,VSNL1,C2CD2L
3.AD/1.YC	GABA_neurons	Down	GO BP	GOBP_REGULATION_OF_HYDROGEN_PEROXIDE_MEDIATED_PROGRAMMED_CELL_DEATH	GOBP_REGULATION_OF_HYDROGEN_PEROXIDE_MEDIATED_PROGRAMMED_CELL_DEATH	3.67306	0.00154842	0.0388533	PARK7,MET,PINK1,ENDOG
3.AD/1.YC	GABA_neurons	Down	GO BP	GOBP_DERMATAN_SULFATE_METABOLIC_PROCESS	GOBP_DERMATAN_SULFATE_METABOLIC_PROCESS	2.99598	0.00159906	0.0395679	DCN,UST,CSPG5,NCAN,BCAN
3.AD/1.YC	GABA_neurons	Down	GO BP	GOBP_NEGATIVE_REGULATION_OF_CATECHOLAMINE_SECRETION	GOBP_NEGATIVE_REGULATION_OF_CATECHOLAMINE_SECRETION	2.99598	0.00159906	0.0395679	CRH,ADRA2A,SYT4,SYT11,CHGA
3.AD/1.YC	GABA_neurons	Down	GO BP	GOBP_REGULATION_OF_CARDIAC_MUSCLE_CONTRACTION_BY_CALCIUM_ION_SIGNALING	GOBP_REGULATION_OF_CARDIAC_MUSCLE_CONTRACTION_BY_CALCIUM_ION_SIGNALING	2.31306	0.00160597	0.0395679	CALM1,CALM3,CALM2,ATP2A2,ATP1B1,PLN,GSTO1
3.AD/1.YC	GABA_neurons	Down	GO BP	GOBP_REGULATION_OF_MITOCHONDRIAL_FISSION	GOBP_REGULATION_OF_MITOCHONDRIAL_FISSION	2.31306	0.00160597	0.0395679	PPARGC1A,LRRK2,DCN,PINK1,FIS1,VPS35,MFF
3.AD/1.YC	GABA_neurons	Down	GO BP	GOBP_PURINE_CONTAINING_COMPOUND_METABOLIC_PROCESS	GOBP_PURINE_CONTAINING_COMPOUND_METABOLIC_PROCESS	0.729415	0.00163045	0.0398225	PPARGC1A,LRRK2,HMGCS1,ACSL6,ATP6V0C,RAN,HTR2A,PINK1,GAPDH,LDHA,HPCA,PAPSS2,ATP5F1B,ATP5F1A,TMSB4X,ACSM6,MPC2,NME1,NME2,ALDOC,STOML2,PGAM1,PKM,PGK1,ANTKMT,HMGCR,ENO2,PDHB,PFKM,TPI1,PMVK,NUDT4,SULT4A1,PDP1,ACOT6,TDO2,ATP5PD,ATP5F1D,ATP5F1E,ATP5PB,ATP5MC1,ATP5MC3,ATP5PF,ATP5PO,UQCC3,ATP5MF,GDA,HINT1,PDE1A,DNPH1,GUK1
3.AD/1.YC	GABA_neurons	Down	GO BP	GOBP_NEGATIVE_REGULATION_OF_PROTEIN_MODIFICATION_BY_SMALL_PROTEIN_CONJUGATION_OR_REMOVAL	GOBP_NEGATIVE_REGULATION_OF_PROTEIN_MODIFICATION_BY_SMALL_PROTEIN_CONJUGATION_OR_REMOVAL	1.39731	0.00163093	0.0398225	PARK7,RPL5,RPL11,CDK5,PER2,RPL23,SPRY2,SH3RF2,PPIA,RPS3,RPS7,PRR7,VPS28,CAMLG,COPS9
3.AD/1.YC	GABA_neurons	Down	GO BP	GOBP_RIBOSE_PHOSPHATE_BIOSYNTHETIC_PROCESS	GOBP_RIBOSE_PHOSPHATE_BIOSYNTHETIC_PROCESS	1.03689	0.00167057	0.0406084	PPARGC1A,ACSL6,ATP6V0C,PINK1,PAPSS2,ATP5F1B,ATP5F1A,TMSB4X,MPC2,NME1,NME2,STOML2,PKM,ANTKMT,PDHB,PDP1,ATP5PD,ATP5F1D,ATP5F1E,ATP5PB,ATP5MC1,ATP5MC3,ATP5PF,ATP5PO,UQCC3,ATP5MF
3.AD/1.YC	GABA_neurons	Down	GO BP	GOBP_PROTEIN_INSERTION_INTO_ER_MEMBRANE	GOBP_PROTEIN_INSERTION_INTO_ER_MEMBRANE	2.55924	0.00175698	0.0421442	MMGT1,EMC10,TRAM2,EMC4,EMC7,EMC6
3.AD/1.YC	GABA_neurons	Down	GO BP	GOBP_POSITIVE_REGULATION_OF_CALCIUM_ION_DEPENDENT_EXOCYTOSIS	GOBP_POSITIVE_REGULATION_OF_CALCIUM_ION_DEPENDENT_EXOCYTOSIS	2.55924	0.00175698	0.0421442	CDK5,ARF1,SYT4,STX1A,CACNA1G,CDK5R2
3.AD/1.YC	GABA_neurons	Down	GO BP	GOBP_CELLULAR_TRANSITION_METAL_ION_HOMEOSTASIS	GOBP_CELLULAR_TRANSITION_METAL_ION_HOMEOSTASIS	1.25166	0.0017875	0.0426882	SOD1,NDFIP1,ISCU,FTH1,FTL,SLC39A6,SCARA5,ATOX1,SLC22A17,ATP6AP1,SLC30A3,SLC39A7,ATP6V1G1,SKP1,ARF1,SCO2,NEDD8,TMEM199
3.AD/1.YC	GABA_neurons	Down	GO BP	GOBP_POSITIVE_REGULATION_OF_CANONICAL_WNT_SIGNALING_PATHWAY	GOBP_POSITIVE_REGULATION_OF_CANONICAL_WNT_SIGNALING_PATHWAY	1.14453	0.00183611	0.0435953	LRRK2,SMAD3,PPM1A,ATP6AP2,PIN1,PSMA3,PSMA7,PSMB1,PSMB3,PSMB6,PSMB10,PSMC3,PSMC5,PSMD2,PSMD7,PSMD8,PSMD6,ILK,RSPO2,LRRK1,TMEM198
3.AD/1.YC	GABA_neurons	Down	GO BP	GOBP_ANTIGEN_PROCESSING_AND_PRESENTATION	GOBP_ANTIGEN_PROCESSING_AND_PRESENTATION	0.956958	0.00184149	0.0435953	BCAP31,CALR,DYNLL1,PSMA3,PSMA7,PSMB1,PSMB3,PSMB6,PSMB10,PSMC3,PSMC5,PSMD2,PSMD7,PSMD8,THBS1,PSMD6,DCTN3,ARF1,SH3GL2,AP2M1,AP2S1,ACTR1B,CTSL,HLA-A,HLA-C,PDIA3,AP1S1,RILP,CTSF,RAB33A
3.AD/1.YC	GABA_neurons	Down	GO BP	GOBP_POSITIVE_REGULATION_OF_RELEASE_OF_SEQUESTERED_CALCIUM_ION_INTO_CYTOSOL	GOBP_POSITIVE_REGULATION_OF_RELEASE_OF_SEQUESTERED_CALCIUM_ION_INTO_CYTOSOL	1.8926	0.00195723	0.0461346	CX3CL1,CALM1,CALM3,THY1,CALM2,CEMIP,GSTO1,NPSR1,JPH2
3.AD/1.YC	GABA_neurons	Down	GO BP	GOBP_RESPONSE_TO_CALCIUM_ION	GOBP_RESPONSE_TO_CALCIUM_ION	1.13257	0.00196808	0.0461906	CRHBP,EDN1,HSPA5,TRPC3,TTN,THBS1,CALM1,ECT2,CALM3,PPIF,ENDOG,SYT2,CPNE5,SYT4,CALM2,HPCA,SYT11,SYT5,HOMER1,TNNT2,SYT13
3.AD/1.YC	GABA_neurons	Down	GO BP	GOBP_REGULATION_OF_RYANODINE_SENSITIVE_CALCIUM_RELEASE_CHANNEL_ACTIVITY	GOBP_REGULATION_OF_RYANODINE_SENSITIVE_CALCIUM_RELEASE_CHANNEL_ACTIVITY	2.23498	0.00206111	0.0479604	CALM1,CALM3,FKBP1A,CALM2,PLN,GSTO1,JPH2
3.AD/1.YC	GABA_neurons	Down	GO BP	GOBP_NEURON_CELLULAR_HOMEOSTASIS	GOBP_NEURON_CELLULAR_HOMEOSTASIS	2.03249	0.00208617	0.0481404	TYRO3,CDK5,CX3CL1,ADORA1,ATP2B1,TSPOAP1,CALB1,NELL2
3.AD/1.YC	GABA_neurons	Down	GO BP	GOBP_REGULATION_OF_CHOLESTEROL_METABOLIC_PROCESS	GOBP_REGULATION_OF_CHOLESTEROL_METABOLIC_PROCESS	1.6456	0.00208653	0.0481404	HMGCS1,SOD1,RAN,CYP51A1,HMGCR,GNB3,PMVK,FDPS,FMO5,IDI1,TM7SF2
3.AD/1.YC	GABA_neurons	Down	GO BP	GOBP_REGULATION_OF_INTRACELLULAR_TRANSPORT	GOBP_REGULATION_OF_INTRACELLULAR_TRANSPORT	0.804682	0.00216141	0.0492421	BCAP31,PARK7,LRRK2,HSP90AB1,RAN,CDK5,SMAD3,PPM1A,TXN,MDFIC,NDRG4,PINK1,YWHAB,CD81,CDK5R1,FIS1,MFF,ECT2,ARF1,UBL5,HAX1,TOMM7,ATP5IF1,BVES,YWHAH,HPCA,INSIG1,TMEM30A,PDCD5,CEMIP,CAMK1,PTPN14,PLN,ANTKMT,OAZ1,ERLEC1,ZFAND1,SEC16B,CABP1,CALY,REEP5
3.AD/1.YC	GABA_neurons	Down	GO BP	GOBP_PROTEASOMAL_PROTEIN_CATABOLIC_PROCESS	GOBP_PROTEASOMAL_PROTEIN_CATABOLIC_PROCESS	0.700618	0.00217855	0.0494258	BCAP31,PARK7,LRRK2,HSPA5,HSP90AB1,PITHD1,BUB1B,UBB,RPL11,ANAPC11,PLK2,RPS27A,UBA52,UBC,SH3RF2,ARAF,PSMA3,PSMA7,PSMB1,PSMB3,PSMB6,PSMB10,PSMC3,PSMC5,PSMD2,PSMD7,PSMD8,SKP1,PINK1,UCHL1,PSMD6,STUB1,RNF187,HECW1,UBE2S,FBXL12,SIAH2,FBXL15,RACK1,GABARAPL2,TAF9,PRICKLE1,DNAJB9,HSP90B1,UCHL5,ELOB,ZFAND2B,ERLEC1,RHBDD2,TMUB2,HECTD3,CAMLG,ENC1
3.AD/1.YC	GABA_neurons	Down	GO BP	GOBP_CELLULAR_RESPONSE_TO_HYDROGEN_PEROXIDE	GOBP_CELLULAR_RESPONSE_TO_HYDROGEN_PEROXIDE	1.3994	0.00226349	0.050665	PARK7,LRRK2,TXN,NR4A3,SIRPA,MET,RPS3,PINK1,ECT2,APEX1,PPIF,RACK1,ENDOG,MAP1LC3A
3.AD/1.YC	GABA_neurons	Down	GO BP	GOBP_PROTEIN_CATABOLIC_PROCESS	GOBP_PROTEIN_CATABOLIC_PROCESS	0.523265	0.00227039	0.050665	BCAP31,PARK7,LRRK2,HSPA5,HSP90AB1,SERPINE2,PITHD1,BUB1B,UBB,VIP,MAGEF1,NDFIP1,RPL5,RPL11,ANAPC11,PLK2,SMAD3,RPS27A,UBA52,UBC,RPL23,ADRA2A,SH3RF2,ARAF,PIN1,PSMA3,PSMA7,PSMB1,PSMB3,PSMB6,PSMB10,PSMC3,PSMC5,PSMD2,PSMD7,PSMD8,SKP1,PINK1,UCHL1,CD81,PSMD6,RPS7,STUB1,RNF187,HECW1,RNF167,UBE2S,FBXL12,SIAH2,FBXL15,VPS35,TOM1L1,RACK1,HSPA8,GABARAPL2,ATP5IF1,TAF9,USP43,XBP1,ADAMTS12,AP2M1,AP2S1,PRICKLE1,CTS…
3.AD/1.YC	GABA_neurons	Down	GO BP	GOBP_CELLULAR_PROTEIN_COMPLEX_DISASSEMBLY	GOBP_CELLULAR_PROTEIN_COMPLEX_DISASSEMBLY	0.966771	0.00231957	0.0513508	TRMT112,CFL1,SPEF1,STMN1,STMN4,AURKAIP1,GADD45GIP1,HSPA8,MRPL12,MICAL2,MRPS36,CHCHD1,MRPL55,MRPL21,MRPL46,MRPL2,MRPL51,MRPL27,MRPS21,MRPL16,MRPS22,MRPS12,MRPL14,MRPS24,MRPL36,MRPL34,MRPS34,MRPL57,MRPL43
3.AD/1.YC	GABA_neurons	Down	GO BP	GOBP_POSITIVE_REGULATION_OF_SEQUESTERING_OF_CALCIUM_ION	GOBP_POSITIVE_REGULATION_OF_SEQUESTERING_OF_CALCIUM_ION	2.82598	0.0023392	0.0513508	CALM1,CALM3,CALM2,GSTO1,MTLN
3.AD/1.YC	GABA_neurons	Down	GO BP	GOBP_REGULATION_OF_MEMBRANE_DEPOLARIZATION	GOBP_REGULATION_OF_MEMBRANE_DEPOLARIZATION	1.84672	0.00234828	0.0513508	LRRK2,DCN,RACK1,SCN1B,CCK,SCN2B,CACNA1G,MLLT11,GOT1
3.AD/1.YC	GABA_neurons	Down	GO BP	GOBP_TRANSFORMING_GROWTH_FACTOR_BETA_PRODUCTION	GOBP_TRANSFORMING_GROWTH_FACTOR_BETA_PRODUCTION	1.84672	0.00234828	0.0513508	HSP90AB1,SMAD3,CD24,ATP6AP2,FN1,THBS1,FKBP1A,PTGS2,CD200
3.AD/1.YC	GABA_neurons	Down	GO BP	GOBP_REGULATION_OF_CELLULAR_RESPONSE_TO_TRANSFORMING_GROWTH_FACTOR_BETA_STIMULUS	GOBP_REGULATION_OF_CELLULAR_RESPONSE_TO_TRANSFORMING_GROWTH_FACTOR_BETA_STIMULUS	1.2297	0.00237738	0.0517793	CITED2,HSPA5,HSP90AB1,UBB,EID2,SMAD3,PPM1A,RPS27A,UBA52,UBC,SPRY2,SPRED1,PIN1,THBS1,STUB1,TGFBR3L,GOT1,RASL11B,NREP
3.AD/1.YC	GABA_neurons	Down	GO BP	GOBP_POSITIVE_REGULATION_OF_INTRINSIC_APOPTOTIC_SIGNALING_PATHWAY	GOBP_POSITIVE_REGULATION_OF_INTRINSIC_APOPTOTIC_SIGNALING_PATHWAY	1.6138	0.00241855	0.052141	BCAP31,PARK7,SOD1,UBB,RPL11,RPL26,RPS3,RPS7,FIS1,RACK1,SERINC3
3.AD/1.YC	GABA_neurons	Down	GO BP	GOBP_CELLULAR_PROTEIN_CATABOLIC_PROCESS	GOBP_CELLULAR_PROTEIN_CATABOLIC_PROCESS	0.556556	0.00242908	0.052141	BCAP31,PARK7,LRRK2,HSPA5,HSP90AB1,PITHD1,BUB1B,UBB,MAGEF1,NDFIP1,RPL5,RPL11,ANAPC11,PLK2,RPS27A,UBA52,UBC,RPL23,SH3RF2,ARAF,PSMA3,PSMA7,PSMB1,PSMB3,PSMB6,PSMB10,PSMC3,PSMC5,PSMD2,PSMD7,PSMD8,SKP1,PINK1,UCHL1,CD81,PSMD6,RPS7,STUB1,RNF187,HECW1,RNF167,UBE2S,FBXL12,SIAH2,FBXL15,VPS35,TOM1L1,RACK1,GABARAPL2,ATP5IF1,TAF9,USP43,XBP1,ADAMTS12,AP2M1,AP2S1,PRICKLE1,CTSL,DNAJB9,HSP90B1,CTSF,PCYOX1L,UCHL5,E…
3.AD/1.YC	GABA_neurons	Down	GO BP	GOBP_REGULATION_OF_NEUROTRANSMITTER_TRANSPORT	GOBP_REGULATION_OF_NEUROTRANSMITTER_TRANSPORT	1.32303	0.00243632	0.052141	LRRK2,RAB3A,CDK5,PER2,ADRA2A,HTR2A,CALM1,PRKCB,CALM3,CAMK2A,CSPG5,SYT4,SYT11,ATP2A2,SNCG,STX1A
3.AD/1.YC	GABA_neurons	Down	GO BP	GOBP_RESPONSE_TO_ISCHEMIA	GOBP_RESPONSE_TO_ISCHEMIA	1.71389	0.00244186	0.052141	PPARGC1A,EGR1,PER2,CX3CL1,PINK1,STUB1,CAMK2A,PPIF,BVES,HYOU1
3.AD/1.YC	GABA_neurons	Down	GO BP	GOBP_POSITIVE_REGULATION_OF_RELEASE_OF_CYTOCHROME_C_FROM_MITOCHONDRIA	GOBP_POSITIVE_REGULATION_OF_RELEASE_OF_CYTOCHROME_C_FROM_MITOCHONDRIA	2.16092	0.00260985	0.0555103	PINK1,MFF,PPIF,MLLT11,MOAP1,HRK,PDCD5
3.AD/1.YC	GABA_neurons	Down	GO BP	GOBP_REGULATION_OF_CATION_CHANNEL_ACTIVITY	GOBP_REGULATION_OF_CATION_CHANNEL_ACTIVITY	1.05966	0.00268035	0.0565678	PPARGC1A,CRH,CRHBP,CDK5,NEFL,PINK1,CALM1,CALM3,FKBP1A,SCN1B,CALM2,HPCA,KCNA1,TMSB4X,CAPN1,HOMER1,PLN,ANTKMT,GSTO1,LRRC38,KCNS1,KCNS2,SHISA8,JPH2
3.AD/1.YC	GABA_neurons	Down	GO BP	GOBP_REGULATION_OF_STEM_CELL_DIFFERENTIATION	GOBP_REGULATION_OF_STEM_CELL_DIFFERENTIATION	1.22912	0.00271901	0.0571621	PDGFRA,PSMA3,PSMA7,PSMB1,PSMB3,PSMB6,PSMB10,PSMC3,PSMC5,PSMD2,PSMD7,PSMD8,PSMD6,SOX6,PRICKLE1,OCIAD2,OCIAD1
3.AD/1.YC	GABA_neurons	Down	GO BP	GOBP_RESPONSE_TO_INORGANIC_SUBSTANCE	GOBP_RESPONSE_TO_INORGANIC_SUBSTANCE	0.650537	0.00273982	0.0573781	PPARGC1A,PARK7,LRRK2,CRHBP,EDN1,ERCC1,HMGCS1,HSPA5,SERPINF1,SOD1,TRPC3,CALR,SLC30A3,TTN,TXN,NR4A3,SIRPA,MET,NEFL,RPS3,PINK1,PRDX2,THBS1,CALM1,PPP1CA,ECT2,APEX1,CALM3,PPIF,RACK1,ENDOG,LDHA,PRDX1,MAP1LC3A,HNRNPA1,SYT2,CPNE5,SYT4,CALM2,HPCA,SYT11,SYT5,KCNA1,CACNA1G,GGH,HOMER1,PLN,TNNT2,GOT1,ATP5F1D,NSMCE3,SYT13,ZFAND1,SELENOM,SELENOW,ZNF658,CUTA
3.AD/1.YC	GABA_neurons	Down	GO BP	GOBP_PROTEIN_TARGETING_TO_MITOCHONDRION	GOBP_PROTEIN_TARGETING_TO_MITOCHONDRION	1.28813	0.002794	0.0582887	BCAP31,LRRK2,DNAJC19,PINK1,FIS1,MFF,UBL5,HAX1,TOMM7,ATP5IF1,TOMM20,PDCD5,SLC25A6,NDUFA13,TIMM8B,TOMM5
3.AD/1.YC	GABA_neurons	Down	GO BP	GOBP_ACIDIC_AMINO_ACID_TRANSPORT	GOBP_ACIDIC_AMINO_ACID_TRANSPORT	1.48183	0.00302021	0.0627674	RAB3A,PER2,ARL6IP5,ADORA1,CCK,SNAP25,STX1A,TSPOAP1,ARL6IP1,PRAF2,SLC17A7,SLC17A6
3.AD/1.YC	GABA_neurons	Down	GO BP	GOBP_REGULATION_OF_CELL_DEATH	GOBP_REGULATION_OF_CELL_DEATH	0.405508	0.00312239	0.0643993	PPARGC1A,SLC25A4,BCAP31,CITED2,PARK7,PHB2,LRRK2,CRH,EDN1,EGR1,GPX4,HPGD,HSPA5,HSP90AB1,SERPINF1,RPS6,BMPR1B,SOD1,TYRO3,UBB,VDAC2,VIP,CALR,RPL10,RPL11,PLK2,RPL26,CDK5,NOX4,FHL2,SMAD3,NR4A2,RARB,RPS27A,TMBIM6,TXN,UBA52,UBC,NR4A3,SPRY2,DYNLT1,ARL6IP5,ERP29,COPS5,SH3RF2,NENF,ARAF,MET,NEFL,PIN1,PPIA,STRADB,PSMC5,RPS3,CX3CL1,PINK1,PRDX2,THBS1,SCG2,RPS3A,RPS7,ADORA1,SIAH2,CFL1,SPEF1,CDK5R1,FIS1,VPS35,PP…
3.AD/1.YC	GABA_neurons	Down	GO BP	GOBP_POSITIVE_REGULATION_OF_INTRACELLULAR_PROTEIN_TRANSPORT	GOBP_POSITIVE_REGULATION_OF_INTRACELLULAR_PROTEIN_TRANSPORT	1.01126	0.00315408	0.0648075	BCAP31,HSP90AB1,RAN,CDK5,SMAD3,PPM1A,PINK1,YWHAB,CD81,CDK5R1,FIS1,MFF,ECT2,UBL5,TOMM7,YWHAH,HPCA,TMEM30A,PDCD5,CEMIP,CAMK1,OAZ1,ZFAND1,SEC16B
3.AD/1.YC	GABA_neurons	Down	GO BP	GOBP_REGULATION_OF_HORMONE_LEVELS	GOBP_REGULATION_OF_HORMONE_LEVELS	0.644743	0.00317928	0.0650797	PPARGC1A,SLC25A4,PARK7,CRH,CRHBP,EDN1,EGR1,PDGFRA,CYP26B1,RBP4,TAC1,VGF,VIP,DYNLL1,CRYM,PER2,ATP6AP2,ADRA2A,CAMK2N1,ADORA1,CARTPT,STUB1,LRP5,CCN3,SNAP25,STX1A,TSPOAP1,ATP1A1,ENPEP,GCNT4,ALDH1A2,NMU,ALDH1A1,DPP4,MPC2,PHPT1,SELENOT,VSNL1,C2CD2L,CHGA,CTSL,ALDH1A3,PCSK1N,SLC25A5,SLC25A6,ENHO,KCNS3,NNAT,GNB3,BCO1,PCSK1,SCG5,DHRS11,SELENOM,SLC22A9
3.AD/1.YC	GABA_neurons	Down	GO BP	GOBP_PRESYNAPTIC_ENDOCYTOSIS	GOBP_PRESYNAPTIC_ENDOCYTOSIS	1.55222	0.00321065	0.0654756	LRRK2,CDK5,CALM1,CALM3,SYT2,SH3GL2,SYT11,SNCG,STX1A,SYT5,SLC17A7
3.AD/1.YC	GABA_neurons	Down	GO BP	GOBP_TERPENOID_BIOSYNTHETIC_PROCESS	GOBP_TERPENOID_BIOSYNTHETIC_PROCESS	2.67391	0.00330013	0.0663643	HMGCS1,ALDH1A2,ALDH1A3,FDPS,BCO1
3.AD/1.YC	GABA_neurons	Down	GO BP	GOBP_REGULATION_OF_SYNAPTIC_VESICLE_ENDOCYTOSIS	GOBP_REGULATION_OF_SYNAPTIC_VESICLE_ENDOCYTOSIS	2.67391	0.00330013	0.0663643	LRRK2,CALM1,CALM3,SYT11,SLC17A7
3.AD/1.YC	GABA_neurons	Down	GO BP	GOBP_RESPONSE_TO_INTERLEUKIN_1	GOBP_RESPONSE_TO_INTERLEUKIN_1	0.967031	0.00330888	0.0663643	EDN1,EGR1,UBB,RPS27A,UBA52,UBC,SIRPA,PSMA3,PSMA7,PSMB1,PSMB3,PSMB6,PSMB10,PSMC3,PSMC5,PSMD2,PSMD7,PSMD8,CX3CL1,SKP1,UBE2V1,PSMD6,TAF9,ADAMTS12,IL1RL2,IL1RAP
3.AD/1.YC	GABA_neurons	Down	GO BP	GOBP_REGULATION_OF_CHOLESTEROL_BIOSYNTHETIC_PROCESS	GOBP_REGULATION_OF_CHOLESTEROL_BIOSYNTHETIC_PROCESS	1.75909	0.00331517	0.0663643	HMGCS1,SOD1,RAN,CYP51A1,HMGCR,PMVK,FDPS,IDI1,TM7SF2
3.AD/1.YC	GABA_neurons	Down	GO BP	GOBP_REGULATION_OF_RELEASE_OF_CYTOCHROME_C_FROM_MITOCHONDRIA	GOBP_REGULATION_OF_RELEASE_OF_CYTOCHROME_C_FROM_MITOCHONDRIA	1.75909	0.00331517	0.0663643	PINK1,MFF,PPIF,PRELID1,MLLT11,GHITM,MOAP1,HRK,PDCD5
3.AD/1.YC	GABA_neurons	Down	GO BP	GOBP_CELLULAR_IRON_ION_HOMEOSTASIS	GOBP_CELLULAR_IRON_ION_HOMEOSTASIS	1.45578	0.00342962	0.0683878	SOD1,NDFIP1,ISCU,FTH1,FTL,SCARA5,SLC22A17,ATP6AP1,ATP6V1G1,SKP1,NEDD8,TMEM199
3.AD/1.YC	GABA_neurons	Down	GO BP	GOBP_REGULATION_OF_PROTEIN_CATABOLIC_PROCESS	GOBP_REGULATION_OF_PROTEIN_CATABOLIC_PROCESS	0.732368	0.00344137	0.0683878	BCAP31,PARK7,LRRK2,HSP90AB1,SERPINE2,PITHD1,UBB,VIP,MAGEF1,NDFIP1,RPL5,RPL11,PLK2,SMAD3,RPL23,ADRA2A,SH3RF2,ARAF,PIN1,PSMC3,PSMD2,PINK1,CD81,RPS7,STUB1,HECW1,VPS35,RACK1,GABARAPL2,ATP5IF1,TAF9,PRICKLE1,RILP,CYP51A1,HMGCR,OAZ1,AZIN1,NDUFA13,UCHL5,ELOB,VPS28,CAMLG,RAB26
3.AD/1.YC	GABA_neurons	Down	GO BP	GOBP_PROTEIN_CONTAINING_COMPLEX_DISASSEMBLY	GOBP_PROTEIN_CONTAINING_COMPLEX_DISASSEMBLY	0.771142	0.00348748	0.0689063	RPL23,TRMT112,CFL1,GABARAP,SPEF1,STMN1,STMN4,PPP1CA,AURKAIP1,GADD45GIP1,MAP1LC3A,HSPA8,GABARAPL2,GABARAPL1,MRPL12,MICAL2,RUBCNL,MRPS36,HMGA1,CHCHD1,MRPL55,MRPL21,MRPL46,MRPL2,MRPL51,MRPL27,MRPS21,MRPL16,MRPS22,MRPS12,MRPL14,MRPS24,MRPL36,MRPL34,MRPS34,MRPL57,MRPL43,ZFAND1
3.AD/1.YC	GABA_neurons	Down	GO BP	GOBP_SCF_DEPENDENT_PROTEASOMAL_UBIQUITIN_DEPENDENT_PROTEIN_CATABOLIC_PROCESS	GOBP_SCF_DEPENDENT_PROTEASOMAL_UBIQUITIN_DEPENDENT_PROTEIN_CATABOLIC_PROCESS	1.31994	0.00349277	0.0689063	PSMA3,PSMA7,PSMB1,PSMB3,PSMB6,PSMB10,PSMC3,PSMC5,PSMD2,PSMD7,PSMD8,SKP1,PSMD6,FBXL12,FBXL15
3.AD/1.YC	GABA_neurons	Down	GO BP	GOBP_PROTEIN_INSERTION_INTO_MEMBRANE	GOBP_PROTEIN_INSERTION_INTO_MEMBRANE	1.37912	0.00353903	0.0695668	MMGT1,EMC10,YWHAB,YWHAH,MOAP1,PDCD5,NDUFA13,TIMM8B,TRAM2,COX18,EMC4,EMC7,EMC6
3.AD/1.YC	GABA_neurons	Down	GO BP	GOBP_AMINO_ACID_TRANSPORT	GOBP_AMINO_ACID_TRANSPORT	1.06338	0.00382972	0.0750102	RAB3A,PER2,ARL6IP5,RGS4,ADORA1,PDPN,CCK,SNAP25,SLC32A1,STX1A,TSPOAP1,SLC25A44,ARL6IP1,PRAF2,SLC38A11,SLC36A1,SLC17A7,SLC17A6,SLC6A7,SLC7A4,SLC25A45
3.AD/1.YC	GABA_neurons	Down	GO BP	GOBP_MITOCHONDRIAL_CYTOCHROME_C_OXIDASE_ASSEMBLY	GOBP_MITOCHONDRIAL_CYTOCHROME_C_OXIDASE_ASSEMBLY	2.25959	0.00400135	0.07726	SCO2,SURF1,COA3,COX18,PET100,COX14
3.AD/1.YC	GABA_neurons	Down	GO BP	GOBP_PROTEIN_REFOLDING	GOBP_PROTEIN_REFOLDING	2.25959	0.00400135	0.07726	HSPA5,HSPA8,FKBP1A,DNAJA2,HSPA14,HSPA13
3.AD/1.YC	GABA_neurons	Down	GO BP	GOBP_POSITIVE_REGULATION_OF_SIGNAL_TRANSDUCTION_BY_P53_CLASS_MEDIATOR	GOBP_POSITIVE_REGULATION_OF_SIGNAL_TRANSDUCTION_BY_P53_CLASS_MEDIATOR	2.25959	0.00400135	0.07726	UBB,RPL11,RPL26,RPL23,SPRED1,RPS7
3.AD/1.YC	GABA_neurons	Down	GO BP	GOBP_REGULATION_OF_CELLULAR_RESPONSE_TO_VASCULAR_ENDOTHELIAL_GROWTH_FACTOR_STIMULUS	GOBP_REGULATION_OF_CELLULAR_RESPONSE_TO_VASCULAR_ENDOTHELIAL_GROWTH_FACTOR_STIMULUS	2.25959	0.00400135	0.07726	DCN,SPRY2,SMOC2,ADAMTS12,ADAMTS3,CD63
3.AD/1.YC	GABA_neurons	Down	GO BP	GOBP_TONIC_SMOOTH_MUSCLE_CONTRACTION	GOBP_TONIC_SMOOTH_MUSCLE_CONTRACTION	3.08808	0.00412688	0.0785694	EDN1,HTR2A,NMU,MYLK
3.AD/1.YC	GABA_neurons	Down	GO BP	GOBP_ATF6_MEDIATED_UNFOLDED_PROTEIN_RESPONSE	GOBP_ATF6_MEDIATED_UNFOLDED_PROTEIN_RESPONSE	3.08808	0.00412688	0.0785694	HSPA5,CALR,XBP1,HSP90B1
3.AD/1.YC	GABA_neurons	Down	GO BP	GOBP_REGULATION_OF_CYCLIC_NUCLEOTIDE_PHOSPHODIESTERASE_ACTIVITY	GOBP_REGULATION_OF_CYCLIC_NUCLEOTIDE_PHOSPHODIESTERASE_ACTIVITY	3.08808	0.00412688	0.0785694	CALM1,CALM3,RACK1,CALM2
3.AD/1.YC	GABA_neurons	Down	GO BP	GOBP_REGULATION_OF_MEMBRANE_POTENTIAL	GOBP_REGULATION_OF_MEMBRANE_POTENTIAL	0.68681	0.00427266	0.0810615	SLC25A36,PARK7,LRRK2,DCN,EDN1,SOD1,TAC1,UBB,CDK5,ARL6IP5,RGS4,PINK1,CALM1,ADORA1,CALM3,RACK1,ATP5IF1,BVES,SCN1B,YWHAH,CCK,CHCHD10,ATP2A2,STX1A,GJC1,KCNA1,KCNA2,ATP1A1,ATP1B1,GPR88,SCN2B,CACNA1G,ADRB1,TUSC2,PRELID1,STOML2,MLLT11,PLN,GLRX,CBLN1,GOT1,KCNH4,KCNH3,KCNK12,GABRD,MTLN,GRIK3
3.AD/1.YC	GABA_neurons	Down	GO BP	GOBP_ESTABLISHMENT_OF_TISSUE_POLARITY	GOBP_ESTABLISHMENT_OF_TISSUE_POLARITY	1.13664	0.00440688	0.0822267	PSMA3,PSMA7,PSMB1,PSMB3,PSMB6,PSMB10,PSMC3,PSMC5,PSMD2,PSMD7,PSMD8,PSMD6,SPEF1,PFN1,AP2M1,AP2S1,PRICKLE1,FZD6
3.AD/1.YC	GABA_neurons	Down	GO BP	GOBP_POSITIVE_REGULATION_OF_CALCIUM_ION_TRANSPORT_INTO_CYTOSOL	GOBP_POSITIVE_REGULATION_OF_CALCIUM_ION_TRANSPORT_INTO_CYTOSOL	1.57268	0.00444774	0.0822267	TRPC3,CX3CL1,CALM1,CALM3,THY1,CALM2,CEMIP,GSTO1,NPSR1,JPH2
3.AD/1.YC	GABA_neurons	Down	GO BP	GOBP_NON_CANONICAL_WNT_SIGNALING_PATHWAY	GOBP_NON_CANONICAL_WNT_SIGNALING_PATHWAY	1.02994	0.00444931	0.0822267	PSMA3,PSMA7,PSMB1,PSMB3,PSMB6,PSMB10,PSMC3,PSMC5,PSMD2,PSMD7,PSMD8,CALM1,PSMD6,SPEF1,CAMK2A,FRZB,PFN1,AP2M1,AP2S1,PRICKLE1,FZD6
3.AD/1.YC	GABA_neurons	Down	GO BP	GOBP_NEGATIVE_REGULATION_OF_CALCIUM_ION_TRANSPORT_INTO_CYTOSOL	GOBP_NEGATIVE_REGULATION_OF_CALCIUM_ION_TRANSPORT_INTO_CYTOSOL	2.53625	0.0045153	0.0822267	TMBIM6,CALM1,CALM3,CALM2,GSTO1
3.AD/1.YC	GABA_neurons	Down	GO BP	GOBP_NEGATIVE_REGULATION_OF_BEHAVIOR	GOBP_NEGATIVE_REGULATION_OF_BEHAVIOR	2.53625	0.0045153	0.0822267	CRH,ADORA1,CCK,NMU,NAPEPLD
3.AD/1.YC	GABA_neurons	Down	GO BP	GOBP_DERMATAN_SULFATE_PROTEOGLYCAN_METABOLIC_PROCESS	GOBP_DERMATAN_SULFATE_PROTEOGLYCAN_METABOLIC_PROCESS	2.53625	0.0045153	0.0822267	DCN,UST,CSPG5,NCAN,BCAN
3.AD/1.YC	GABA_neurons	Down	GO BP	GOBP_NEGATIVE_REGULATION_OF_UBIQUITIN_PROTEIN_TRANSFERASE_ACTIVITY	GOBP_NEGATIVE_REGULATION_OF_UBIQUITIN_PROTEIN_TRANSFERASE_ACTIVITY	2.53625	0.0045153	0.0822267	PARK7,RPL5,RPL11,RPL23,RPS7
3.AD/1.YC	GABA_neurons	Down	GO BP	GOBP_TAIL_ANCHORED_MEMBRANE_PROTEIN_INSERTION_INTO_ER_MEMBRANE	GOBP_TAIL_ANCHORED_MEMBRANE_PROTEIN_INSERTION_INTO_ER_MEMBRANE	2.53625	0.0045153	0.0822267	MMGT1,EMC10,EMC4,EMC7,EMC6
3.AD/1.YC	GABA_neurons	Down	GO BP	GOBP_POSITIVE_REGULATION_OF_MITOCHONDRIAL_FISSION	GOBP_POSITIVE_REGULATION_OF_MITOCHONDRIAL_FISSION	2.53625	0.0045153	0.0822267	DCN,PINK1,FIS1,VPS35,MFF
3.AD/1.YC	GABA_neurons	Down	GO BP	GOBP_REGULATION_OF_PRESYNAPTIC_CYTOSOLIC_CALCIUM_ION_CONCENTRATION	GOBP_REGULATION_OF_PRESYNAPTIC_CYTOSOLIC_CALCIUM_ION_CONCENTRATION	2.53625	0.0045153	0.0822267	CDK5,ADORA1,ATP2B1,TSPOAP1,CALB1
3.AD/1.YC	GABA_neurons	Down	GO BP	GOBP_NUCLEOTIDE_TRANSMEMBRANE_TRANSPORT	GOBP_NUCLEOTIDE_TRANSMEMBRANE_TRANSPORT	2.53625	0.0045153	0.0822267	SLC25A4,SLC25A36,SLC25A5,SLC25A6,SLC25A31
3.AD/1.YC	GABA_neurons	Down	GO BP	GOBP_RESPONSE_TO_SALT	GOBP_RESPONSE_TO_SALT	2.53625	0.0045153	0.0822267	EDN1,HSPA5,NEFL,HNRNPA1,HPCA
3.AD/1.YC	GABA_neurons	Down	GO BP	GOBP_ENDOPLASMIC_RETICULUM_ORGANIZATION	GOBP_ENDOPLASMIC_RETICULUM_ORGANIZATION	1.3574	0.00455992	0.0827626	TMED2,LRRK2,MMGT1,EMC10,ZFYVE27,LNPK,ARL6IP1,TRAM2,SEC16B,EMC4,TMEM33,EMC7,REEP5,EMC6
3.AD/1.YC	GABA_neurons	Down	GO BP	GOBP_INTRINSIC_APOPTOTIC_SIGNALING_PATHWAY	GOBP_INTRINSIC_APOPTOTIC_SIGNALING_PATHWAY	0.811787	0.00463548	0.0836656	BCAP31,PARK7,LRRK2,SOD1,UBB,VDAC2,RPL11,RPL26,TMBIM6,CD24,ARL6IP5,ERP29,PPIA,RPS3,PINK1,RPS7,FIS1,CDKN2D,PPIF,RACK1,TAF9,XBP1,SELENOK,MLLT11,MOAP1,SERINC3,RTKN2,CREB3,HYOU1,NDUFS3,NDUFA13,GRINA,HINT1
3.AD/1.YC	GABA_neurons	Down	GO BP	GOBP_REGULATION_OF_STEROID_BIOSYNTHETIC_PROCESS	GOBP_REGULATION_OF_STEROID_BIOSYNTHETIC_PROCESS	1.33685	0.00477378	0.0857862	PPARGC1A,EGR1,HMGCS1,SOD1,RAN,INSIG1,ATP1A1,ASAH1,CYP51A1,HMGCR,PMVK,FDPS,IDI1,TM7SF2
3.AD/1.YC	GABA_neurons	Down	GO BP	GOBP_REGULATION_OF_PEPTIDE_SECRETION	GOBP_REGULATION_OF_PEPTIDE_SECRETION	0.771507	0.00486882	0.0869205	SLC25A4,CRH,CRHBP,RBP4,DYNLL1,TTN,PER2,ERP29,ADRA2A,PPIA,CAMK2N1,ADORA1,CARTPT,ARF1,LRP5,CCN3,SNAP25,STX1A,NMU,DPP4,ADTRP,MPC2,PHPT1,SELENOT,VSNL1,C2CD2L,CHGA,CD200,CYP51A1,SLC25A5,SLC25A6,HMGCR,ENHO,KCNS3,NNAT
3.AD/1.YC	GABA_neurons	Down	GO BP	GOBP_REGULATION_OF_MITOCHONDRIAL_MEMBRANE_PERMEABILITY	GOBP_REGULATION_OF_MITOCHONDRIAL_MEMBRANE_PERMEABILITY	1.38026	0.0049327	0.0877221	VDAC2,DYNLT1,YWHAB,CAMK2A,PPIF,ATP5IF1,YWHAH,CHCHD10,MOAP1,SLC25A5,TMEM14A,RHOT2
3.AD/1.YC	GABA_neurons	Down	GO BP	GOBP_CELLULAR_OXIDANT_DETOXIFICATION	GOBP_CELLULAR_OXIDANT_DETOXIFICATION	1.22877	0.00494595	0.0877221	PARK7,GPX4,SOD1,TXN,PRDX2,PRDX5,PRDX1,PTGS2,SELENOT,GSTO1,MGST3,GSTK1,IPCEF1,SELENOW,TXNDC17
3.AD/1.YC	GABA_neurons	Down	GO BP	GOBP_REGULATION_OF_OXIDATIVE_PHOSPHORYLATION	GOBP_REGULATION_OF_OXIDATIVE_PHOSPHORYLATION	2.17207	0.00508486	0.0890259	PINK1,PPIF,COX7A1,COX7A2,ANTKMT,COX7A2L
3.AD/1.YC	GABA_neurons	Down	GO BP	GOBP_REGULATION_OF_PROTON_TRANSPORT	GOBP_REGULATION_OF_PROTON_TRANSPORT	2.17207	0.00508486	0.0890259	PARK7,PHB2,PPIF,TMSB4X,ANTKMT,PM20D1
3.AD/1.YC	GABA_neurons	Down	GO BP	GOBP_REGULATION_OF_SYNAPTIC_VESICLE_RECYCLING	GOBP_REGULATION_OF_SYNAPTIC_VESICLE_RECYCLING	2.17207	0.00508486	0.0890259	LRRK2,CDK5,CALM1,CALM3,SYT11,SLC17A7
3.AD/1.YC	GABA_neurons	Down	GO BP	GOBP_REGULATION_OF_UBIQUITIN_PROTEIN_LIGASE_ACTIVITY	GOBP_REGULATION_OF_UBIQUITIN_PROTEIN_LIGASE_ACTIVITY	2.17207	0.00508486	0.0890259	RPL5,RPL11,RPL23,SKP1,RPS7,UBE2S
3.AD/1.YC	GABA_neurons	Down	GO BP	GOBP_REGULATION_OF_SYNAPTIC_VESICLE_EXOCYTOSIS	GOBP_REGULATION_OF_SYNAPTIC_VESICLE_EXOCYTOSIS	1.53943	0.00511015	0.089182	LRRK2,RAB3A,CDK5,ADRA2A,HTR2A,CALM1,PRKCB,CALM3,CSPG5,ATP2A2
3.AD/1.YC	GABA_neurons	Down	GO BP	GOBP_REGULATION_OF_ANATOMICAL_STRUCTURE_MORPHOGENESIS	GOBP_REGULATION_OF_ANATOMICAL_STRUCTURE_MORPHOGENESIS	0.479327	0.0051267	0.089185	PPARGC1A,ACTR2,CITED2,PHB2,LRRK2,DCN,EDN1,SERPINF1,CALR,MELTF,RAB11A,PLK2,CDK5,BCL11A,SPRY2,SPRED1,FN1,EMC10,NEFL,PSMA3,PSMA7,PSMB1,PSMB3,PSMB6,PSMB10,PSMC3,PSMC5,PSMD2,PSMD7,PSMD8,RAP2A,PINK1,THBS1,PSMD6,HECW1,CFL1,SPEF1,CDK5R1,PHLDB2,FIS1,VPS35,MFF,LZTS1,PRKCB,SMOC2,RACK1,MESP1,UST,PDPN,CSPG5,BVES,CHN1,ZFYVE27,SYT2,EFNB3,EPB41,FSTL4,RHOBTB2,NGEF,RND1,ILK,ITPKA,SLC26A5,NEDD9,OMG,RHOJ,STRIP2,CPNE…
3.AD/1.YC	GABA_neurons	Down	GO BP	GOBP_PLATELET_DEGRANULATION	GOBP_PLATELET_DEGRANULATION	1.0957	0.00526363	0.0912754	MAGED2,PSAP,SOD1,TTN,FN1,THBS1,CALM1,TUBA4A,ECM1,TMSB4X,CD63,FAM3C,F5,SCG3,APLP2,TMX3,MANF,PCYOX1L
3.AD/1.YC	GABA_neurons	Down	GO BP	GOBP_RESPONSE_TO_CARBOHYDRATE	GOBP_RESPONSE_TO_CARBOHYDRATE	0.876537	0.00535978	0.0926476	PPARGC1A,CRH,EGR1,ERCC1,SERPINF1,DYNLL1,ADRA2A,CAMK2N1,THBS1,LRP5,PRKCB,RACK1,ENDOG,LDHA,PIH1D1,XBP1,GJB6,MPC2,PHPT1,LGALS1,NME1,NME2,SELENOT,VSNL1,C2CD2L,GOT1,COL6A2
3.AD/1.YC	GABA_neurons	Down	GO BP	GOBP_REGULATION_OF_STEROID_METABOLIC_PROCESS	GOBP_REGULATION_OF_STEROID_METABOLIC_PROCESS	1.16798	0.00537976	0.0926988	PPARGC1A,EGR1,HMGCS1,SOD1,RAN,STUB1,INSIG1,ATP1A1,ASAH1,CYP51A1,HMGCR,GNB3,PMVK,FDPS,FMO5,IDI1,TM7SF2
3.AD/1.YC	GABA_neurons	Down	GO BP	GOBP_REGULATION_OF_CATABOLIC_PROCESS	GOBP_REGULATION_OF_CATABOLIC_PROCESS	0.461595	0.00550857	0.0946189	PPARGC1A,BCAP31,PARK7,PHB2,LRRK2,DCN,MEIOC,HPGD,HSP90AB1,SERPINE2,PSAP,PITHD1,UBB,VIP,MAGEF1,NDFIP1,RPL5,RPL11,ATP6V1B2,ATP6V0C,ATP6V0B,ATP6V1G1,PLK2,CDK5,SMAD3,RPS27A,UBA52,UBC,RPL23,CAMKK2,ADRA2A,SH3RF2,LAMTOR2,HTR2A,ARAF,MET,PIN1,PSMA3,PSMA7,PSMB1,PSMB3,PSMB6,PSMB10,PSMC3,PSMC5,PSMD2,PSMD7,PSMD8,PINK1,UCHL1,YWHAB,CD81,PSMD6,RPS7,ADORA1,STUB1,HECW1,GAPDH,CDK5R1,VPS35,PPP1CA,LZTS1,APEX1,POLR2G,R…
3.AD/1.YC	GABA_neurons	Down	GO BP	GOBP_SYNAPTIC_VESICLE_RECYCLING	GOBP_SYNAPTIC_VESICLE_RECYCLING	1.35592	0.00553652	0.0947999	LRRK2,RAB3A,CDK5,CALM1,CALM3,SYT2,SH3GL2,SYT11,SNCG,STX1A,SYT5,SLC17A7
3.AD/1.YC	GABA_neurons	Down	GO BP	GOBP_HEMATOPOIETIC_STEM_CELL_DIFFERENTIATION	GOBP_HEMATOPOIETIC_STEM_CELL_DIFFERENTIATION	1.27687	0.00566987	0.0964763	PSMA3,PSMA7,PSMB1,PSMB3,PSMB6,PSMB10,PSMC3,PSMC5,PSMD2,PSMD7,PSMD8,PSMD6,OCIAD2,OCIAD1
3.AD/1.YC	GABA_neurons	Down	GO BP	GOBP_HORMONE_TRANSPORT	GOBP_HORMONE_TRANSPORT	0.748103	0.00574231	0.0971021	SLC25A4,PARK7,CRH,CRHBP,EDN1,RBP4,TAC1,VGF,VIP,DYNLL1,CRYM,PER2,ADRA2A,CAMK2N1,ADORA1,CARTPT,LRP5,CCN3,SNAP25,STX1A,NMU,DPP4,MPC2,PHPT1,SELENOT,VSNL1,C2CD2L,CHGA,SLC25A5,SLC25A6,ENHO,KCNS3,NNAT,SCG5,SELENOM,SLC22A9
3.AD/1.YC	GABA_neurons	Down	GO BP	GOBP_RELAXATION_OF_MUSCLE	GOBP_RELAXATION_OF_MUSCLE	1.8975	0.0059866	0.0996726	SOD1,ADORA1,ATP2A2,ATP1A1,ATP1B1,CHGA,PLN
3.AD/1.YC	GABA_neurons	Down	GO BP	GOBP_RESPONSE_TO_TOPOLOGICALLY_INCORRECT_PROTEIN	GOBP_RESPONSE_TO_TOPOLOGICALLY_INCORRECT_PROTEIN	0.908537	0.0060173	0.0996726	TMED2,HSPA5,HSP90AB1,CALR,TMBIM6,COPS5,THBS1,STUB1,RACK1,HSPA8,XBP1,DNAJB9,HSP90B1,F12,CREB3,MANF,HYOU1,EXTL2,DNAJB5,HSPA14,HSPA13,RHBDD2,KDELR3,ARFGAP1,TMEM33,HSPB3
3.AD/1.YC	GABA_neurons	Down	GO BP	GOBP_RELAXATION_OF_CARDIAC_MUSCLE	GOBP_RELAXATION_OF_CARDIAC_MUSCLE	2.41066	0.00601781	0.0996726	ATP2A2,ATP1A1,ATP1B1,CHGA,PLN
3.AD/1.YC	GABA_neurons	Down	GO BP	GOBP_PURINE_CONTAINING_COMPOUND_TRANSMEMBRANE_TRANSPORT	GOBP_PURINE_CONTAINING_COMPOUND_TRANSMEMBRANE_TRANSPORT	2.41066	0.00601781	0.0996726	SLC25A4,SLC28A2,SLC25A5,SLC25A6,SLC25A31
3.AD/1.YC	GABA_neurons	Down	GO BP	GOBP_REGULATION_OF_HEMATOPOIETIC_PROGENITOR_CELL_DIFFERENTIATION	GOBP_REGULATION_OF_HEMATOPOIETIC_PROGENITOR_CELL_DIFFERENTIATION	1.25741	0.00605896	0.0996726	PSMA3,PSMA7,PSMB1,PSMB3,PSMB6,PSMB10,PSMC3,PSMC5,PSMD2,PSMD7,PSMD8,PSMD6,OCIAD2,OCIAD1
3.AD/1.YC	GABA_neurons	Down	GO BP	GOBP_SIGNAL_PEPTIDE_PROCESSING	GOBP_SIGNAL_PEPTIDE_PROCESSING	2.8656	0.00611405	0.0996726	SPCS1,SPCS3,SEC11C,SPCS2
3.AD/1.YC	GABA_neurons	Down	GO BP	GOBP_PROTEIN_FOLDING_IN_ENDOPLASMIC_RETICULUM	GOBP_PROTEIN_FOLDING_IN_ENDOPLASMIC_RETICULUM	2.8656	0.00611405	0.0996726	HSPA5,CALR,HSP90B1,PDIA3
3.AD/1.YC	GABA_neurons	Down	GO BP	GOBP_NEGATIVE_REGULATION_OF_RYANODINE_SENSITIVE_CALCIUM_RELEASE_CHANNEL_ACTIVITY	GOBP_NEGATIVE_REGULATION_OF_RYANODINE_SENSITIVE_CALCIUM_RELEASE_CHANNEL_ACTIVITY	2.8656	0.00611405	0.0996726	CALM1,CALM3,CALM2,GSTO1
3.AD/1.YC	GABA_neurons	Down	GO BP	GOBP_PROGRAMMED_CELL_DEATH_IN_RESPONSE_TO_REACTIVE_OXYGEN_SPECIES	GOBP_PROGRAMMED_CELL_DEATH_IN_RESPONSE_TO_REACTIVE_OXYGEN_SPECIES	2.8656	0.00611405	0.0996726	PARK7,MET,PINK1,ENDOG
3.AD/1.YC	GABA_neurons	Down	GO BP	GOBP_POSITIVE_REGULATION_OF_MEMBRANE_DEPOLARIZATION	GOBP_POSITIVE_REGULATION_OF_MEMBRANE_DEPOLARIZATION	2.8656	0.00611405	0.0996726	DCN,RACK1,CCK,MLLT11
3.AD/1.YC	GABA_neurons	Down	GO BP	GOBP_PEPTIDE_HORMONE_SECRETION	GOBP_PEPTIDE_HORMONE_SECRETION	0.830291	0.0061224	0.0996726	SLC25A4,PARK7,CRH,CRHBP,EDN1,RBP4,VGF,VIP,DYNLL1,PER2,ADRA2A,CAMK2N1,CARTPT,LRP5,CCN3,SNAP25,STX1A,NMU,DPP4,MPC2,PHPT1,SELENOT,VSNL1,C2CD2L,CHGA,SLC25A5,SLC25A6,ENHO,KCNS3,NNAT
3.AD/1.YC	GABA_neurons	Down	GO BP	GOBP_REGULATION_OF_FATTY_ACID_TRANSPORT	GOBP_REGULATION_OF_FATTY_ACID_TRANSPORT	1.59827	0.00616708	0.0996726	EDN1,PER2,ARL6IP5,THBS1,ADORA1,FIS1,CCK,ARL6IP1,FABP3
3.AD/1.YC	GABA_neurons	Down	GO BP	GOBP_POSITIVE_REGULATION_OF_CALCIUM_ION_TRANSPORT	GOBP_POSITIVE_REGULATION_OF_CALCIUM_ION_TRANSPORT	1.12375	0.00618531	0.0996726	CRH,TRPC3,CDK5,CX3CL1,CALM1,CALM3,CAMK2A,THY1,CALM2,ATP2B1,ATP1B1,HOMER1,CEMIP,MYLK,GSTO1,NPSR1,JPH2
3.AD/1.YC	GABA_neurons	Down	GO BP	GOBP_POSITIVE_REGULATION_OF_TRANSFERASE_ACTIVITY	GOBP_POSITIVE_REGULATION_OF_TRANSFERASE_ACTIVITY	0.544058	0.00618721	0.0996726	CCT2,PARK7,PHB2,LRRK2,EDN1,EGR1,HSP90AB1,PDGFRA,PRKAR1A,ROS1,SOD1,TYRO3,UBB,CDK5,NOX4,RPS27A,TXN,UBA52,UBC,SPRY2,CD24,RASGRP1,ERP29,ADRA2A,GNG3,LAMTOR2,MDFIC,HTR2A,ARAF,MET,PIN1,PPIA,STRADB,RPS3,SKP1,PINK1,PRDX2,THBS1,UBE2V1,CALM1,CD81,RPLP1,RPS2,ADORA1,CARTPT,STUB1,UBE2S,CDK5R1,TOM1L1,JTB,ECT2,CALM3,PIH1D1,EPHB6,NEDD9,BDNF,CALM2,LMO4,CDK5R2,CD200,TCIM,DIPK2A,MTCP1,FAM20A,CEMIP,CAMKK1,CAMK1,SERIN…
3.AD/1.YC	GABA_neurons	Down	GO BP	GOBP_CELL_COMMUNICATION_BY_ELECTRICAL_COUPLING_INVOLVED_IN_CARDIAC_CONDUCTION	GOBP_CELL_COMMUNICATION_BY_ELECTRICAL_COUPLING_INVOLVED_IN_CARDIAC_CONDUCTION	2.08957	0.00636881	0.102296	CALM1,CALM3,CALM2,GJC1,ATP1A1,ATP1B1
3.AD/1.YC	GABA_neurons	Down	GO BP	GOBP_CELLULAR_RESPONSE_TO_REACTIVE_OXYGEN_SPECIES	GOBP_CELLULAR_RESPONSE_TO_REACTIVE_OXYGEN_SPECIES	1.00311	0.00645184	0.103324	PARK7,LRRK2,PDGFRA,SOD1,TXN,NR4A3,CAMKK2,SIRPA,MET,RPS3,PINK1,PRDX2,ECT2,APEX1,PPIF,RACK1,ENDOG,PRDX5,PRDX1,MAP1LC3A
3.AD/1.YC	GABA_neurons	Down	GO BP	GOBP_NUCLEOBASE_CONTAINING_SMALL_MOLECULE_METABOLIC_PROCESS	GOBP_NUCLEOBASE_CONTAINING_SMALL_MOLECULE_METABOLIC_PROCESS	0.565509	0.00648307	0.103457	PPARGC1A,GNPDA1,PARK7,LRRK2,HMGCS1,ACSL6,ATP6V0C,RAN,HTR2A,PINK1,GAPDH,UGP2,LDHA,HPCA,PAPSS2,ATP5F1B,PTGS2,ATP5F1A,TMSB4X,ACSM6,MPC2,NME1,NME2,ALDOC,STOML2,PGAM1,PKM,NAXE,PGK1,GLRX,ANTKMT,HMGCR,ENO2,GALT,PDHB,PFKM,TPI1,EXTL2,DPAGT1,PMVK,NUDT4,DPYS,SULT4A1,PDP1,ACOT6,TDO2,ATP5PD,ATP5F1D,ATP5F1E,ATP5PB,ATP5MC1,ATP5MC3,ATP5PF,ATP5PO,UQCC3,ATP5MF,GDA,HINT1,PDE1A,DNPH1,GUK1,SMPDL3A
3.AD/1.YC	GABA_neurons	Down	GO BP	GOBP_INSULIN_SECRETION	GOBP_INSULIN_SECRETION	0.88401	0.00649813	0.103457	SLC25A4,PARK7,CRH,RBP4,VGF,DYNLL1,PER2,ADRA2A,CAMK2N1,CARTPT,LRP5,CCN3,SNAP25,STX1A,DPP4,MPC2,PHPT1,SELENOT,VSNL1,C2CD2L,CHGA,SLC25A5,SLC25A6,ENHO,KCNS3,NNAT
3.AD/1.YC	GABA_neurons	Down	GO BP	GOBP_NEGATIVE_REGULATION_OF_PROTEIN_CATABOLIC_PROCESS	GOBP_NEGATIVE_REGULATION_OF_PROTEIN_CATABOLIC_PROCESS	1.1093	0.00652579	0.103595	PARK7,HSP90AB1,SERPINE2,RPL5,RPL11,SMAD3,RPL23,PIN1,RPS7,GABARAPL2,TAF9,RILP,CYP51A1,HMGCR,AZIN1,UCHL5,CAMLG
3.AD/1.YC	GABA_neurons	Down	GO BP	GOBP_REGULATION_OF_REGULATED_SECRETORY_PATHWAY	GOBP_REGULATION_OF_REGULATED_SECRETORY_PATHWAY	1.07103	0.00662695	0.104895	LRRK2,RAB3A,CDK5,ADRA2A,HTR2A,CALM1,ARF1,PRKCB,CALM3,CSPG5,SYT2,SYT4,SYT11,ATP2A2,STX1A,SYT5,CACNA1G,CDK5R2,SYT13
3.AD/1.YC	GABA_neurons	Down	GO BP	GOBP_TRANSITION_METAL_ION_HOMEOSTASIS	GOBP_TRANSITION_METAL_ION_HOMEOSTASIS	1.05856	0.00684078	0.107965	SOD1,NDFIP1,ISCU,FTH1,FTL,SLC39A6,SCARA5,MELTF,ATOX1,SLC22A17,ATP6AP1,SLC30A3,SLC39A7,ATP6V1G1,SKP1,ARF1,SCO2,NEDD8,TMEM199
3.AD/1.YC	GABA_neurons	Down	GO BP	GOBP_REGULATION_OF_PEPTIDE_HORMONE_SECRETION	GOBP_REGULATION_OF_PEPTIDE_HORMONE_SECRETION	0.867993	0.00692394	0.108648	SLC25A4,CRH,CRHBP,RBP4,DYNLL1,PER2,ADRA2A,CAMK2N1,CARTPT,LRP5,CCN3,SNAP25,STX1A,NMU,DPP4,MPC2,PHPT1,SELENOT,VSNL1,C2CD2L,CHGA,SLC25A5,SLC25A6,ENHO,KCNS3,NNAT
3.AD/1.YC	GABA_neurons	Down	GO BP	GOBP_NEGATIVE_REGULATION_OF_UBIQUITIN_DEPENDENT_PROTEIN_CATABOLIC_PROCESS	GOBP_NEGATIVE_REGULATION_OF_UBIQUITIN_DEPENDENT_PROTEIN_CATABOLIC_PROCESS	1.56071	0.00711103	0.111263	PARK7,HSP90AB1,RPL5,RPL11,RPL23,RPS7,TAF9,UCHL5,CAMLG
3.AD/1.YC	GABA_neurons	Down	GO BP	GOBP_PHOTOPERIODISM	GOBP_PHOTOPERIODISM	1.83854	0.0071906	0.111682	PER1,BHLHE40,PER2,FBXL12,PPP1CA,NMU,OPN5
3.AD/1.YC	GABA_neurons	Down	GO BP	GOBP_POST_TRANSLATIONAL_PROTEIN_MODIFICATION	GOBP_POST_TRANSLATIONAL_PROTEIN_MODIFICATION	0.69204	0.00726707	0.112412	RAB3A,VGF,MELTF,RAB11A,COPS5,FN1,PSMA3,PSMA7,PSMB1,PSMB3,PSMB6,PSMB10,PSMC3,PSMC5,PSMD2,PSMD7,PSMD8,SKP1,SCG2,PSMD6,FBXL12,FBXL15,FSTL1,LGALS1,RCN1,HSP90B1,F5,SCG3,APLP2,FN3K,ELOC,ELOB,SERPIND1,NEDD8,RABGGTB,BTBD6,SPARCL1,TGOLN2,CHGB,TMEM132A
3.AD/1.YC	GABA_neurons	Down	GO BP	GOBP_INORGANIC_ANION_TRANSPORT	GOBP_INORGANIC_ANION_TRANSPORT	0.931746	0.00734556	0.112988	ROS1,VDAC2,TTYH1,VDAC1,SLC26A5,SLC22A8,SLC22A6,SLC17A7,ATP8B1,SLC25A14,ADAMTS8,CA7,SLC13A4,SLC25A3,SLC12A5,SLC12A4,SLC20A1,GABRD,SLC26A4,ANO3,LRRC8B,VDAC3
3.AD/1.YC	GABA_neurons	Down	GO BP	GOBP_DE_NOVO_PROTEIN_FOLDING	GOBP_DE_NOVO_PROTEIN_FOLDING	1.67562	0.00734577	0.112988	CCT2,HSPA5,HSPA8,FKBP1A,DNAJB5,HSPA14,BAG1,HSPA13
3.AD/1.YC	GABA_neurons	Down	GO BP	GOBP_MAINTENANCE_OF_PROTEIN_LOCATION	GOBP_MAINTENANCE_OF_PROTEIN_LOCATION	1.20046	0.00752394	0.115402	PARK7,HSPA5,CDK5,TXN,RIT2,SKP1,PINK1,YWHAB,CHCHD10,INSIG1,TMSB4X,KDELR2,KDELR3,TMSB10
3.AD/1.YC	GABA_neurons	Down	GO BP	GOBP_MACROAUTOPHAGY	GOBP_MACROAUTOPHAGY	0.727671	0.00762706	0.116311	PHB2,LRRK2,DCN,DYNLL1,ATP6V1B2,ATP6V0C,ATP6V0B,ATP6V1G1,CDK5,LAMTOR2,PINK1,UCHL1,GABARAP,GAPDH,CDK5R1,VPS35,LZTS1,MAP1LC3A,GABARAPL2,FUNDC1,GABARAPL1,TOMM7,VDAC1,ATG9A,LAMTOR5,RRAGA,TOMM20,RHEB,CAPN1,RUBCNL,VPS28,TOMM5,EMC6,UFC1,TOMM6
3.AD/1.YC	GABA_neurons	Down	GO BP	GOBP_NEGATIVE_REGULATION_OF_TRANSFORMING_GROWTH_FACTOR_BETA_RECEPTOR_SIGNALING_PATHWAY	GOBP_NEGATIVE_REGULATION_OF_TRANSFORMING_GROWTH_FACTOR_BETA_RECEPTOR_SIGNALING_PATHWAY	1.29138	0.00766865	0.116311	HSPA5,UBB,EID2,SMAD3,PPM1A,RPS27A,UBA52,UBC,SPRY2,SPRED1,PIN1,STUB1,RASL11B
3.AD/1.YC	GABA_neurons	Down	GO BP	GOBP_CELLULAR_RESPONSE_TO_CALCIUM_ION	GOBP_CELLULAR_RESPONSE_TO_CALCIUM_ION	1.29138	0.00766865	0.116311	CRHBP,EDN1,HSPA5,ECT2,PPIF,ENDOG,SYT2,CPNE5,SYT4,HPCA,SYT11,SYT5,SYT13
3.AD/1.YC	GABA_neurons	Down	GO BP	GOBP_REGULATION_OF_PROTEIN_TARGETING	GOBP_REGULATION_OF_PROTEIN_TARGETING	1.29138	0.00766865	0.116311	LRRK2,CDK5,PINK1,CDK5R1,FIS1,MFF,UBL5,HAX1,TOMM7,ATP5IF1,HPCA,PDCD5,CEMIP
3.AD/1.YC	GABA_neurons	Down	GO BP	GOBP_REGULATION_OF_CELLULAR_KETONE_METABOLIC_PROCESS	GOBP_REGULATION_OF_CELLULAR_KETONE_METABOLIC_PROCESS	0.948673	0.00776009	0.117046	PPARGC1A,PARK7,EGR1,NR4A3,PSMA3,PSMA7,PSMB1,PSMB3,PSMB6,PSMB10,PSMC3,PSMC5,PSMD2,PSMD7,PSMD8,PSMD6,INSIG1,PTGS2,COQ3,FABP3,OAZ1,AZIN1,PDP1
3.AD/1.YC	GABA_neurons	Down	GO BP	GOBP_REGULATION_OF_ANIMAL_ORGAN_MORPHOGENESIS	GOBP_REGULATION_OF_ANIMAL_ORGAN_MORPHOGENESIS	0.948673	0.00776009	0.117046	CITED2,PHB2,EDN1,PSMA3,PSMA7,PSMB1,PSMB3,PSMB6,PSMB10,PSMC3,PSMC5,PSMD2,PSMD7,PSMD8,PSMD6,SPEF1,MESP1,RSPO2,PFN1,AP2M1,AP2S1,PRICKLE1,FZD6
3.AD/1.YC	GABA_neurons	Down	GO BP	GOBP_L_GLUTAMATE_TRANSMEMBRANE_TRANSPORT	GOBP_L_GLUTAMATE_TRANSMEMBRANE_TRANSPORT	2.01156	0.00787287	0.117769	PER2,ARL6IP5,ARL6IP1,PRAF2,SLC17A7,SLC17A6
3.AD/1.YC	GABA_neurons	Down	GO BP	GOBP_ENDOPLASMIC_RETICULUM_CALCIUM_ION_HOMEOSTASIS	GOBP_ENDOPLASMIC_RETICULUM_CALCIUM_ION_HOMEOSTASIS	2.01156	0.00787287	0.117769	BCAP31,TMBIM6,FIS1,ATP2A2,SELENOK,GRINA
3.AD/1.YC	GABA_neurons	Down	GO BP	GOBP_NEGATIVE_REGULATION_OF_RNA_SPLICING	GOBP_NEGATIVE_REGULATION_OF_RNA_SPLICING	2.01156	0.00787287	0.117769	TMBIM6,RPS13,RPS26,SRSF9,SAP18,SRSF7
3.AD/1.YC	GABA_neurons	Down	GO BP	GOBP_AMINO_SUGAR_METABOLIC_PROCESS	GOBP_AMINO_SUGAR_METABOLIC_PROCESS	1.63113	0.00855728	0.126365	GNPDA1,ST3GAL1,CHST1,EXTL2,MDP1,DPAGT1,CMAS,FN3K
3.AD/1.YC	GABA_neurons	Down	GO BP	GOBP_NEGATIVE_REGULATION_OF_PEPTIDE_HORMONE_SECRETION	GOBP_NEGATIVE_REGULATION_OF_PEPTIDE_HORMONE_SECRETION	1.63113	0.00855728	0.126365	CRH,CRHBP,ADRA2A,CARTPT,CCN3,VSNL1,CHGA,ENHO
3.AD/1.YC	GABA_neurons	Down	GO BP	GOBP_NEGATIVE_REGULATION_OF_INTRACELLULAR_PROTEIN_TRANSPORT	GOBP_NEGATIVE_REGULATION_OF_INTRACELLULAR_PROTEIN_TRANSPORT	1.63113	0.00855728	0.126365	PARK7,LRRK2,CDK5,TXN,MDFIC,INSIG1,ERLEC1,CABP1
3.AD/1.YC	GABA_neurons	Down	GO BP	GOBP_NEGATIVE_REGULATION_OF_OXIDATIVE_STRESS_INDUCED_CELL_DEATH	GOBP_NEGATIVE_REGULATION_OF_OXIDATIVE_STRESS_INDUCED_CELL_DEATH	1.63113	0.00855728	0.126365	PARK7,LRRK2,TXN,NR4A3,MET,PPIA,PINK1,RACK1
3.AD/1.YC	GABA_neurons	Down	GO BP	GOBP_REGULATION_OF_OXIDATIVE_STRESS_INDUCED_CELL_DEATH	GOBP_REGULATION_OF_OXIDATIVE_STRESS_INDUCED_CELL_DEATH	1.41351	0.00856359	0.126365	PARK7,LRRK2,SOD1,TXN,NR4A3,MET,PPIA,PINK1,RACK1,ENDOG
3.AD/1.YC	GABA_neurons	Down	GO BP	GOBP_CELLULAR_RESPONSE_TO_NITROGEN_STARVATION	GOBP_CELLULAR_RESPONSE_TO_NITROGEN_STARVATION	2.67289	0.00864782	0.126579	GABARAP,MAP1LC3A,GABARAPL2,GABARAPL1
3.AD/1.YC	GABA_neurons	Down	GO BP	GOBP_REGULATION_OF_AMINO_ACID_IMPORT_ACROSS_PLASMA_MEMBRANE	GOBP_REGULATION_OF_AMINO_ACID_IMPORT_ACROSS_PLASMA_MEMBRANE	2.67289	0.00864782	0.126579	PER2,ARL6IP5,RGS4,ARL6IP1
3.AD/1.YC	GABA_neurons	Down	GO BP	GOBP_REGULATION_OF_CELLULAR_RESPONSE_TO_HYPOXIA	GOBP_REGULATION_OF_CELLULAR_RESPONSE_TO_HYPOXIA	2.67289	0.00864782	0.126579	TMBIM6,PINK1,HYOU1,CHCHD2
3.AD/1.YC	GABA_neurons	Down	GO BP	GOBP_REGULATION_OF_HEART_RATE	GOBP_REGULATION_OF_HEART_RATE	1.16382	0.00876997	0.128023	EDN1,TAC1,RGS4,CALM1,CALM3,BVES,SCN1B,CALM2,ATP2A2,SCN2B,CACNA1G,NMU,ADRB1,PLN
3.AD/1.YC	GABA_neurons	Down	GO BP	GOBP_RESPONSE_TO_METAL_ION	GOBP_RESPONSE_TO_METAL_ION	0.691685	0.00888563	0.129364	PPARGC1A,PARK7,LRRK2,CRHBP,EDN1,ERCC1,HSPA5,SERPINF1,SOD1,TRPC3,CALR,SLC30A3,TTN,THBS1,CALM1,PPP1CA,ECT2,CALM3,PPIF,ENDOG,MAP1LC3A,SYT2,CPNE5,SYT4,CALM2,HPCA,SYT11,SYT5,KCNA1,CACNA1G,GGH,HOMER1,PLN,TNNT2,GOT1,ATP5F1D,SYT13,ZNF658,CUTA
3.AD/1.YC	GABA_neurons	Down	GO BP	GOBP_MEMBRANE_DEPOLARIZATION	GOBP_MEMBRANE_DEPOLARIZATION	1.22873	0.0092368	0.133054	PARK7,LRRK2,DCN,EDN1,RACK1,ATP5IF1,SCN1B,YWHAH,CCK,SCN2B,CACNA1G,MLLT11,GOT1
3.AD/1.YC	GABA_neurons	Down	GO BP	GOBP_IRON_ION_HOMEOSTASIS	GOBP_IRON_ION_HOMEOSTASIS	1.22873	0.0092368	0.133054	SOD1,NDFIP1,ISCU,FTH1,FTL,SCARA5,MELTF,SLC22A17,ATP6AP1,ATP6V1G1,SKP1,NEDD8,TMEM199
3.AD/1.YC	GABA_neurons	Down	GO BP	GOBP_NAD_METABOLIC_PROCESS	GOBP_NAD_METABOLIC_PROCESS	1.48828	0.00932606	0.133282	GAPDH,LDHA,ALDOC,PGAM1,PKM,PGK1,ENO2,PFKM,TPI1
3.AD/1.YC	GABA_neurons	Down	GO BP	GOBP_MATURATION_OF_SSU_RRNA	GOBP_MATURATION_OF_SSU_RRNA	1.48828	0.00932606	0.133282	RPS14,RPS19,RPS28,TSR3,RPS8,RPS16,RPS21,SNU13,TSR2
3.AD/1.YC	GABA_neurons	Down	GO BP	GOBP_RESPONSE_TO_INTERLEUKIN_12	GOBP_RESPONSE_TO_INTERLEUKIN_12	1.48828	0.00932606	0.133282	SNRPA1,SOD1,RPLP0,SIRPA,PPIA,CFL1,ARF1,GSTO1,STAT4
3.AD/1.YC	GABA_neurons	Down	GO BP	GOBP_PROTEIN_STABILIZATION	GOBP_PROTEIN_STABILIZATION	0.883381	0.00948055	0.133916	PPARGC1A,CCT7,CCT2,PARK7,PHB2,HSP90AB1,CALR,RPL5,RPL11,SMAD3,RPL23,PIN1,PINK1,RPS7,GAPDH,PPIB,TAF9,ATP1B1,PFN1,PFN2,CCT6A,BAG1,CAMLG
3.AD/1.YC	GABA_neurons	Down	GO BP	GOBP_MONOSACCHARIDE_BIOSYNTHETIC_PROCESS	GOBP_MONOSACCHARIDE_BIOSYNTHETIC_PROCESS	1.14582	0.00948064	0.133916	PPARGC1A,RBP4,PER2,GAPDH,ARPP19,ALDOC,PGAM1,PGK1,FAM3C,GOT1,ENO2,MDH1,MDH2,TPI1
3.AD/1.YC	GABA_neurons	Down	GO BP	GOBP_PHOSPHATE_ION_TRANSPORT	GOBP_PHOSPHATE_ION_TRANSPORT	1.93723	0.0096164	0.133916	ROS1,SLC17A7,SLC25A14,ADAMTS8,SLC25A3,SLC20A1
3.AD/1.YC	GABA_neurons	Down	GO BP	GOBP_RESPIRATORY_CHAIN_COMPLEX_IV_ASSEMBLY	GOBP_RESPIRATORY_CHAIN_COMPLEX_IV_ASSEMBLY	1.93723	0.0096164	0.133916	SCO2,SURF1,COA3,COX18,PET100,COX14
3.AD/1.YC	GABA_neurons	Down	GO BP	GOBP_NEURON_DEATH_IN_RESPONSE_TO_OXIDATIVE_STRESS	GOBP_NEURON_DEATH_IN_RESPONSE_TO_OXIDATIVE_STRESS	1.93723	0.0096164	0.133916	PARK7,NR4A3,ARL6IP5,PINK1,RACK1,ENDOG
3.AD/1.YC	GABA_neurons	Down	GO BP	GOBP_REGULATION_OF_PROTEIN_EXIT_FROM_ENDOPLASMIC_RETICULUM	GOBP_REGULATION_OF_PROTEIN_EXIT_FROM_ENDOPLASMIC_RETICULUM	1.93723	0.0096164	0.133916	BCAP31,CD81,INSIG1,TMEM30A,ERLEC1,SEC16B
3.AD/1.YC	GABA_neurons	Down	GO BP	GOBP_REGULATION_OF_ORGANIC_ACID_TRANSPORT	GOBP_REGULATION_OF_ORGANIC_ACID_TRANSPORT	1.38368	0.00965603	0.134125	EDN1,PER2,ARL6IP5,RGS4,THBS1,ADORA1,FIS1,CCK,ARL6IP1,FABP3
3.AD/1.YC	GABA_neurons	Down	GO BP	GOBP_POSITIVE_REGULATION_OF_PROTEIN_KINASE_ACTIVITY	GOBP_POSITIVE_REGULATION_OF_PROTEIN_KINASE_ACTIVITY	0.578297	0.00985951	0.135911	PARK7,PHB2,LRRK2,EDN1,EGR1,HSP90AB1,PRKAR1A,SOD1,UBB,CDK5,NOX4,RPS27A,TXN,UBA52,UBC,SPRY2,CD24,RASGRP1,ERP29,ADRA2A,GNG3,LAMTOR2,MDFIC,HTR2A,ARAF,PPIA,STRADB,RPS3,PINK1,PRDX2,THBS1,UBE2V1,CALM1,CD81,RPLP1,ADORA1,CARTPT,CDK5R1,TOM1L1,JTB,ECT2,CALM3,PIH1D1,NEDD9,BDNF,CALM2,CDK5R2,TCIM,DIPK2A,MTCP1,FAM20A,CEMIP,CAMKK1,CAMK1
3.AD/1.YC	GABA_neurons	Down	GO BP	GOBP_NEGATIVE_REGULATION_OF_PEPTIDYL_THREONINE_PHOSPHORYLATION	GOBP_NEGATIVE_REGULATION_OF_PEPTIDYL_THREONINE_PHOSPHORYLATION	2.18821	0.0100124	0.137323	SPRY2,SPRED1,CALM1,CALM3,CALM2
3.AD/1.YC	GABA_neurons	Down	GO BP	GOBP_SYNAPTIC_VESICLE_PRIMING	GOBP_SYNAPTIC_VESICLE_PRIMING	2.18821	0.0100124	0.137323	RAB3A,SNAP25,SNAP47,STX1A,OTOF
3.AD/1.YC	GABA_neurons	Down	GO BP	GOBP_NCRNA_PROCESSING	GOBP_NCRNA_PROCESSING	0.636587	0.0101779	0.138894	RPS6,RPL5,RPL11,RRP7A,RPS14,RPS15,RPS19,RPS27,RPS28,RPL26,SMAD3,TSR3,TRMT112,NOP10,RPL35,RPL10A,RPL7,RPL7A,RPL27,RPL35A,RPS2,RPS7,RPS8,RPS9,RPS16,RPS17,RPS21,RPS24,RPS25,RPL14,CPSF4,SNU13,TSR2,RPL7L1,PIH1D1,POP7,RPP25L,PUS3,WDR74,IMP3,OSGEP,LAGE3
3.AD/1.YC	GABA_neurons	Down	GO BP	GOBP_NEGATIVE_REGULATION_OF_RESPONSE_TO_STIMULUS	GOBP_NEGATIVE_REGULATION_OF_RESPONSE_TO_STIMULUS	0.352522	0.0106947	0.144808	TMED2,PARK7,PHB2,LRRK2,CRHBP,DCN,EDN1,EGR1,ERCC1,HSPA5,PDGFRA,SERPINF1,SERPINE2,CYP26B1,SOD1,TYRO3,UBB,VDAC2,CALR,POLQ,MAGEF1,NDFIP1,RPS19,PLK2,EID2,FHL2,SMAD3,NR4A2,PER1,PPM1A,RPS27A,TMBIM6,TXN,UBA52,UBC,NR4A3,MLIP,SPRY2,ARL6IP5,DUSP14,SIRPA,ADRA2A,SH3RF2,SPRED1,DDT,NENF,MET,PEBP1,PIN1,PPIA,STRADB,CAMK2N1,PSMA3,PSMA7,PSMB1,PSMB3,PSMB6,PSMB10,PSMC3,PSMC5,PSMD2,PSMD7,PSMD8,RGS4,RPS3,CX3CL1,NDRG4,P…
3.AD/1.YC	GABA_neurons	Down	GO BP	GOBP_NUCLEOSIDE_PHOSPHATE_BIOSYNTHETIC_PROCESS	GOBP_NUCLEOSIDE_PHOSPHATE_BIOSYNTHETIC_PROCESS	0.757903	0.0107147	0.144808	PPARGC1A,ACSL6,ATP6V0C,PINK1,HPCA,PAPSS2,ATP5F1B,PTGS2,ATP5F1A,TMSB4X,MPC2,NME1,NME2,STOML2,PKM,NAXE,ANTKMT,PDHB,PDP1,ATP5PD,ATP5F1D,ATP5F1E,ATP5PB,ATP5MC1,ATP5MC3,ATP5PF,ATP5PO,UQCC3,ATP5MF,GUK1
3.AD/1.YC	GABA_neurons	Down	GO BP	GOBP_RESPONSE_TO_MONOSACCHARIDE	GOBP_RESPONSE_TO_MONOSACCHARIDE	0.883561	0.0107176	0.144808	PPARGC1A,CRH,EGR1,SERPINF1,DYNLL1,ADRA2A,CAMK2N1,THBS1,LRP5,RACK1,ENDOG,LDHA,PIH1D1,XBP1,GJB6,MPC2,PHPT1,LGALS1,NME1,NME2,SELENOT,VSNL1,C2CD2L,COL6A2
3.AD/1.YC	GABA_neurons	Down	GO BP	GOBP_MAINTENANCE_OF_LOCATION	GOBP_MAINTENANCE_OF_LOCATION	0.706225	0.010748	0.144821	PARK7,B4GALNT1,HSPA5,CALR,FTH1,FTL,SLC30A3,CDK5,TXN,HTR2A,RIT2,CX3CL1,SKP1,PINK1,YWHAB,CALM1,CALM3,FKBP1A,THY1,CALM2,CHCHD10,INSIG1,BSCL2,TMSB4X,CEMIP,PLN,HSP90B1,GSTO1,KDELR2,KDELR3,CDS1,NPSR1,JPH2,MTLN,TMSB10
3.AD/1.YC	GABA_neurons	Down	GO BP	GOBP_CELLULAR_RESPONSE_TO_TOXIC_SUBSTANCE	GOBP_CELLULAR_RESPONSE_TO_TOXIC_SUBSTANCE	1.04969	0.0108022	0.144821	PARK7,GPX4,SOD1,TXN,PINK1,PRDX2,PRDX5,PRDX1,PTGS2,SELENOT,GSTO1,MGST3,GSTK1,IPCEF1,SELENOW,TXNDC17
3.AD/1.YC	GABA_neurons	Down	GO BP	GOBP_NEGATIVE_REGULATION_OF_AMYLOID_PRECURSOR_PROTEIN_BIOSYNTHETIC_PROCESS	GOBP_NEGATIVE_REGULATION_OF_AMYLOID_PRECURSOR_PROTEIN_BIOSYNTHETIC_PROCESS	3.257	0.0108153	0.144821	ITM2A,ITM2C,ITM2B
3.AD/1.YC	GABA_neurons	Down	GO BP	GOBP_NEGATIVE_REGULATION_OF_HORMONE_SECRETION	GOBP_NEGATIVE_REGULATION_OF_HORMONE_SECRETION	1.35445	0.0108516	0.144821	CRH,CRHBP,EDN1,ADRA2A,ADORA1,CARTPT,CCN3,VSNL1,CHGA,ENHO
3.AD/1.YC	GABA_neurons	Down	GO BP	GOBP_CHAPERONE_MEDIATED_PROTEIN_FOLDING	GOBP_CHAPERONE_MEDIATED_PROTEIN_FOLDING	1.35445	0.0108516	0.144821	CCT2,HSPA5,HSPA8,FKBP1A,PPIB,PDCD5,DNAJB5,HSPA14,BAG1,HSPA13
3.AD/1.YC	GABA_neurons	Down	GO BP	GOBP_REGULATION_OF_HORMONE_SECRETION	GOBP_REGULATION_OF_HORMONE_SECRETION	0.745111	0.0112652	0.149973	SLC25A4,CRH,CRHBP,EDN1,RBP4,TAC1,DYNLL1,PER2,ADRA2A,CAMK2N1,ADORA1,CARTPT,LRP5,CCN3,SNAP25,STX1A,NMU,DPP4,MPC2,PHPT1,SELENOT,VSNL1,C2CD2L,CHGA,SLC25A5,SLC25A6,ENHO,KCNS3,NNAT,SCG5
3.AD/1.YC	GABA_neurons	Down	GO BP	GOBP_CARBOHYDRATE_DERIVATIVE_BIOSYNTHETIC_PROCESS	GOBP_CARBOHYDRATE_DERIVATIVE_BIOSYNTHETIC_PROCESS	0.505285	0.0113154	0.150274	PPARGC1A,GNPDA1,DCN,B4GALNT1,BMPR1B,ACSL6,ATP6V0C,PINK1,UGP2,B3GALNT1,B3GALT2,UST,CSPG5,NCAN,BCAN,XYLT1,PAPSS2,ATP5F1B,ST3GAL1,GCNT4,ATP5F1A,TMSB4X,MPC2,NME1,NME2,DAD1,STOML2,PKM,ITM2A,CEMIP,ANTKMT,NAGPA,GBGT1,PDHB,TPI1,CHST1,CHST10,B4GAT1,HS3ST2,HS3ST1,EXTL2,DPAGT1,DHDDS,DPM2,PDP1,ATP5PD,ATP5F1D,ATP5F1E,ATP5PB,ATP5MC1,ATP5MC3,ATP5PF,ATP5PO,UQCC3,ATP5MF,KRTCAP2,ASGR1,B3GNT5,PYURF,PIGG,TMEM59,ITM2…
3.AD/1.YC	GABA_neurons	Down	GO BP	GOBP_RESPONSE_TO_COCAINE	GOBP_RESPONSE_TO_COCAINE	1.54607	0.0114201	0.151295	CRH,CRHBP,HSPA5,HSP90AB1,CDK5,HTR2A,RGS4,HOMER1
3.AD/1.YC	GABA_neurons	Down	GO BP	GOBP_SMAD_PROTEIN_COMPLEX_ASSEMBLY	GOBP_SMAD_PROTEIN_COMPLEX_ASSEMBLY	2.50287	0.0117806	0.153687	EID2,SMAD3,PPM1A,FKBP1A
3.AD/1.YC	GABA_neurons	Down	GO BP	GOBP_REGULATION_OF_PLASMINOGEN_ACTIVATION	GOBP_REGULATION_OF_PLASMINOGEN_ACTIVATION	2.50287	0.0117806	0.153687	SERPINE2,MELTF,THBS1,F12
3.AD/1.YC	GABA_neurons	Down	GO BP	GOBP_POSITIVE_REGULATION_OF_CATECHOLAMINE_SECRETION	GOBP_POSITIVE_REGULATION_OF_CATECHOLAMINE_SECRETION	2.50287	0.0117806	0.153687	VIP,PINK1,CARTPT,STX1A
3.AD/1.YC	GABA_neurons	Down	GO BP	GOBP_NEGATIVE_REGULATION_OF_TRANSFORMING_GROWTH_FACTOR_BETA_PRODUCTION	GOBP_NEGATIVE_REGULATION_OF_TRANSFORMING_GROWTH_FACTOR_BETA_PRODUCTION	2.50287	0.0117806	0.153687	HSP90AB1,CD24,FN1,FKBP1A
3.AD/1.YC	GABA_neurons	Down	GO BP	GOBP_NEGATIVE_REGULATION_OF_NEUROINFLAMMATORY_RESPONSE	GOBP_NEGATIVE_REGULATION_OF_NEUROINFLAMMATORY_RESPONSE	2.50287	0.0117806	0.153687	CX3CL1,SYT11,CD200,CD200R1
3.AD/1.YC	GABA_neurons	Down	GO BP	GOBP_POSITIVE_REGULATION_OF_INTRACELLULAR_TRANSPORT	GOBP_POSITIVE_REGULATION_OF_INTRACELLULAR_TRANSPORT	0.805535	0.0118108	0.153687	BCAP31,HSP90AB1,RAN,CDK5,SMAD3,PPM1A,PINK1,YWHAB,CD81,CDK5R1,FIS1,MFF,ECT2,ARF1,UBL5,TOMM7,YWHAH,HPCA,TMEM30A,PDCD5,CEMIP,CAMK1,OAZ1,ZFAND1,SEC16B,CALY
3.AD/1.YC	GABA_neurons	Down	GO BP	GOBP_POSITIVE_REGULATION_OF_INSULIN_SECRETION_INVOLVED_IN_CELLULAR_RESPONSE_TO_GLUCOSE_STIMULUS	GOBP_POSITIVE_REGULATION_OF_INSULIN_SECRETION_INVOLVED_IN_CELLULAR_RESPONSE_TO_GLUCOSE_STIMULUS	1.67479	0.0118768	0.153687	CRH,DYNLL1,CAMK2N1,MPC2,PHPT1,VSNL1,C2CD2L
3.AD/1.YC	GABA_neurons	Down	GO BP	GOBP_REGULATION_OF_PHOSPHOLIPID_METABOLIC_PROCESS	GOBP_REGULATION_OF_PHOSPHOLIPID_METABOLIC_PROCESS	1.67479	0.0118768	0.153687	PHB2,DNAJC19,HTR2A,ARF1,STOML2,GNB3,FABP3
3.AD/1.YC	GABA_neurons	Down	GO BP	GOBP_REGULATION_OF_CELLULAR_LOCALIZATION	GOBP_REGULATION_OF_CELLULAR_LOCALIZATION	0.463703	0.0118828	0.153687	BCAP31,CCT7,CCT2,PARK7,LRRK2,CRH,HSP90AB1,TRPC3,DYNLL1,ISCU,RAN,RAB11A,CDK5,SMAD3,PPM1A,TMBIM6,TXN,ADRA2A,MDFIC,PIN1,CAMK2N1,CX3CL1,NDRG4,PINK1,YWHAB,CALM1,CD81,CDK5R1,FIS1,MFF,ECT2,ARF1,LRP5,CALM3,RACK1,UBL5,FKBP1A,HAX1,TOMM7,ATP5IF1,BVES,EPB41,BDNF,THY1,YWHAH,CALM2,LAMTOR5,HPCA,INSIG1,SYT11,MPC2,PHPT1,VSNL1,C2CD2L,AP2M1,TMEM30A,PDCD5,CEMIP,CAMK1,PTPN14,PLN,ANTKMT,GSTO1,OAZ1,CCT6A,ERLEC1,VPS28,D…
3.AD/1.YC	GABA_neurons	Down	GO BP	GOBP_POSITIVE_REGULATION_OF_WNT_SIGNALING_PATHWAY	GOBP_POSITIVE_REGULATION_OF_WNT_SIGNALING_PATHWAY	0.883235	0.0119349	0.153994	LRRK2,ATP6V0C,SMAD3,PPM1A,ATP6AP2,PIN1,PSMA3,PSMA7,PSMB1,PSMB3,PSMB6,PSMB10,PSMC3,PSMC5,PSMD2,PSMD7,PSMD8,PSMD6,ILK,RSPO2,LRRK1,TMEM198
3.AD/1.YC	GABA_neurons	Down	GO BP	GOBP_REGULATION_OF_EXOCYTOSIS	GOBP_REGULATION_OF_EXOCYTOSIS	0.840582	0.011998	0.154442	LRRK2,RAB3A,ATP6AP1,CDK5,ADRA2A,HTR2A,CALM1,ARF1,PRKCB,CALM3,CSPG5,SYT2,SYT4,SYT11,ATP2A2,STX1A,SYT5,CADPS2,CACNA1G,VSNL1,CDK5R2,SYT13,LGI3,RAB26
3.AD/1.YC	GABA_neurons	Down	GO BP	GOBP_REGULATION_OF_CARDIAC_MUSCLE_CONTRACTION_BY_REGULATION_OF_THE_RELEASE_OF_SEQUESTERED_CALCIUM_ION	GOBP_REGULATION_OF_CARDIAC_MUSCLE_CONTRACTION_BY_REGULATION_OF_THE_RELEASE_OF_SEQUESTERED_CALCIUM_ION	2.08865	0.0125642	0.159842	CALM1,CALM3,CALM2,PLN,GSTO1
3.AD/1.YC	GABA_neurons	Down	GO BP	GOBP_NEGATIVE_REGULATION_OF_ORGANIC_ACID_TRANSPORT	GOBP_NEGATIVE_REGULATION_OF_ORGANIC_ACID_TRANSPORT	2.08865	0.0125642	0.159842	ARL6IP5,RGS4,THBS1,ADORA1,FIS1
3.AD/1.YC	GABA_neurons	Down	GO BP	GOBP_NEGATIVE_REGULATION_OF_NUCLEOCYTOPLASMIC_TRANSPORT	GOBP_NEGATIVE_REGULATION_OF_NUCLEOCYTOPLASMIC_TRANSPORT	2.08865	0.0125642	0.159842	PARK7,CDK5,TXN,MDFIC,CABP1
3.AD/1.YC	GABA_neurons	Down	GO BP	GOBP_RESPONSE_TO_CORTICOSTERONE	GOBP_RESPONSE_TO_CORTICOSTERONE	2.08865	0.0125642	0.159842	CRH,NEFL,CALM1,CALM3,ATP2B1
3.AD/1.YC	GABA_neurons	Down	GO BP	GOBP_POSITIVE_REGULATION_OF_TRANSFORMING_GROWTH_FACTOR_BETA_PRODUCTION	GOBP_POSITIVE_REGULATION_OF_TRANSFORMING_GROWTH_FACTOR_BETA_PRODUCTION	2.08865	0.0125642	0.159842	SMAD3,ATP6AP2,THBS1,PTGS2,CD200
3.AD/1.YC	GABA_neurons	Down	GO BP	GOBP_NEGATIVE_REGULATION_OF_INFLAMMATORY_RESPONSE	GOBP_NEGATIVE_REGULATION_OF_INFLAMMATORY_RESPONSE	1.03915	0.0129433	0.16428	SERPINF1,SOD1,TYRO3,NDFIP1,RPS19,SMAD3,SIRPA,CX3CL1,ADORA1,VPS35,CCN3,SYT11,CD200,CD200R1,NLRX1,GPR17,FNDC4
3.AD/1.YC	GABA_neurons	Down	GO BP	GOBP_PROCESS_UTILIZING_AUTOPHAGIC_MECHANISM	GOBP_PROCESS_UTILIZING_AUTOPHAGIC_MECHANISM	0.553016	0.0133013	0.168431	PPARGC1A,PARK7,PHB2,LRRK2,DCN,PSAP,DYNLL1,ATP6V1B2,ATP6V0C,ATP6V0B,ATP6V1G1,PLK2,CDK5,TMBIM6,CAMKK2,LAMTOR2,MET,PINK1,UCHL1,STUB1,GABARAP,GAPDH,CDK5R1,FIS1,VPS35,LZTS1,MAP1LC3A,HSPA8,HAX1,GABARAPL2,FUNDC1,GABARAPL1,CISD2,TOMM7,VDAC1,ATG9A,ATP5IF1,LAMTOR5,RRAGA,XBP1,TOMM20,SYT11,RHEB,CAPN1,RUBCNL,TMEM208,VPS28,TMEM59,TOMM5,SEC16B,EMC6,UFC1,DEPP1,TOMM6
3.AD/1.YC	GABA_neurons	Down	GO BP	GOBP_NEGATIVE_REGULATION_OF_CELL_CYCLE_G2_M_PHASE_TRANSITION	GOBP_NEGATIVE_REGULATION_OF_CELL_CYCLE_G2_M_PHASE_TRANSITION	1.06183	0.0134819	0.170322	TOPBP1,BABAM1,PSMA3,PSMA7,PSMB1,PSMB3,PSMB6,PSMB10,PSMC3,PSMC5,PSMD2,PSMD7,PSMD8,SKP1,PSMD6
3.AD/1.YC	GABA_neurons	Down	GO BP	GOBP_MODIFICATION_DEPENDENT_MACROMOLECULE_CATABOLIC_PROCESS	GOBP_MODIFICATION_DEPENDENT_MACROMOLECULE_CATABOLIC_PROCESS	0.496935	0.013534	0.170327	BCAP31,PARK7,LRRK2,HSPA5,HSP90AB1,BUB1B,UBB,MAGEF1,NDFIP1,RPL5,RPL11,ANAPC11,PLK2,RPS27A,UBA52,UBC,RPL23,SH3RF2,ARAF,PSMA3,PSMA7,PSMB1,PSMB3,PSMB6,PSMB10,PSMC3,PSMC5,PSMD2,PSMD7,PSMD8,SKP1,PINK1,UCHL1,PSMD6,RPS7,STUB1,RNF187,HECW1,RNF167,UBE2S,FBXL12,SIAH2,FBXL15,TOM1L1,RACK1,TAF9,USP43,XBP1,PRICKLE1,DNAJB9,HSP90B1,PCYOX1L,UCHL5,ELOC,ELOB,ZFAND2B,NEDD8,VPS28,NDFIP2,RHBDD2,TMUB2,HECTD3,CAMLG,LNX1
3.AD/1.YC	GABA_neurons	Down	GO BP	GOBP_NEGATIVE_REGULATION_OF_PROTEOLYSIS_INVOLVED_IN_CELLULAR_PROTEIN_CATABOLIC_PROCESS	GOBP_NEGATIVE_REGULATION_OF_PROTEOLYSIS_INVOLVED_IN_CELLULAR_PROTEIN_CATABOLIC_PROCESS	1.29778	0.0135754	0.170327	PARK7,HSP90AB1,RPL5,RPL11,RPL23,RPS7,GABARAPL2,TAF9,UCHL5,CAMLG
3.AD/1.YC	GABA_neurons	Down	GO BP	GOBP_ESTABLISHMENT_OF_PROTEIN_LOCALIZATION_TO_MITOCHONDRIAL_MEMBRANE	GOBP_ESTABLISHMENT_OF_PROTEIN_LOCALIZATION_TO_MITOCHONDRIAL_MEMBRANE	1.38622	0.0135761	0.170327	YWHAB,CALM1,CALM3,YWHAH,MOAP1,PDCD5,NDUFA13,TIMM8B,COX18
3.AD/1.YC	GABA_neurons	Down	GO BP	GOBP_APOPTOTIC_PROCESS	GOBP_APOPTOTIC_PROCESS	0.322243	0.0136174	0.170453	PPARGC1A,SLC25A4,BCAP31,CITED2,PARK7,PHB2,LRRK2,CRH,EDN1,EGR1,ETV6,HPGD,HSPA5,HSP90AB1,RPS6,BMPR1B,SOD1,BUB1B,TYRO3,UBB,VDAC2,VIP,CALR,DYNLL1,RPL10,RPL11,PLK2,RPL26,CDK5,NOX4,FHL2,KCNIP3,SMAD3,NR4A2,RARB,RPS27A,TMBIM6,UBA52,UBC,SPRY2,CD24,ARL6IP5,ERP29,COPS5,SH3RF2,ARAF,NEFL,PIN1,PPIA,STRADB,RPS3,CX3CL1,PINK1,PRDX2,THBS1,YWHAB,SCG2,RPS3A,RPS7,ADORA1,SIAH2,CFL1,GABARAP,GAPDH,CDK5R1,PUF60,FIS1,VPS3…
3.AD/1.YC	GABA_neurons	Down	GO BP	GOBP_NEGATIVE_REGULATION_OF_CALCIUM_ION_TRANSMEMBRANE_TRANSPORT	GOBP_NEGATIVE_REGULATION_OF_CALCIUM_ION_TRANSMEMBRANE_TRANSPORT	1.62407	0.0138402	0.172332	ADRA2A,CALM1,CALM3,VDAC1,CALM2,PLN,GSTO1
3.AD/1.YC	GABA_neurons	Down	GO BP	GOBP_MATURATION_OF_LSU_RRNA	GOBP_MATURATION_OF_LSU_RRNA	1.79966	0.0138967	0.172332	RPL35,RPL10A,RPL7,RPL7A,SNU13,RPL7L1
3.AD/1.YC	GABA_neurons	Down	GO BP	GOBP_TETRAPYRROLE_BIOSYNTHETIC_PROCESS	GOBP_TETRAPYRROLE_BIOSYNTHETIC_PROCESS	1.79966	0.0138967	0.172332	ATP5IF1,PGRMC1,ALAS1,TMEM14C,UROS,UROD
3.AD/1.YC	GABA_neurons	Down	GO BP	GOBP_MORPHOGENESIS_OF_A_POLARIZED_EPITHELIUM	GOBP_MORPHOGENESIS_OF_A_POLARIZED_EPITHELIUM	0.962412	0.0141123	0.17385	PSMA3,PSMA7,PSMB1,PSMB3,PSMB6,PSMB10,PSMC3,PSMC5,PSMD2,PSMD7,PSMD8,PSMD6,SPEF1,PFN1,AP2M1,AP2S1,PRICKLE1,ACTG1,FZD6
3.AD/1.YC	GABA_neurons	Down	GO BP	GOBP_POSITIVE_REGULATION_OF_PROTEIN_SERINE_THREONINE_KINASE_ACTIVITY	GOBP_POSITIVE_REGULATION_OF_PROTEIN_SERINE_THREONINE_KINASE_ACTIVITY	0.679225	0.0142548	0.174813	LRRK2,EDN1,HSP90AB1,SOD1,UBB,RPS27A,UBA52,UBC,SPRY2,CD24,RASGRP1,ERP29,ADRA2A,GNG3,MDFIC,HTR2A,PPIA,RPS3,PRDX2,THBS1,UBE2V1,CALM1,CD81,CDK5R1,CALM3,PIH1D1,CALM2,CDK5R2,TCIM,DIPK2A,MTCP1,FAM20A,CEMIP,CAMK1
3.AD/1.YC	GABA_neurons	Down	GO BP	GOBP_POSITIVE_REGULATION_OF_PROTEIN_DEPHOSPHORYLATION	GOBP_POSITIVE_REGULATION_OF_PROTEIN_DEPHOSPHORYLATION	1.46566	0.0149326	0.181898	HSP90AB1,PIN1,PPIA,PINK1,CALM1,ADORA1,CALM3,CALM2
3.AD/1.YC	GABA_neurons	Down	GO BP	GOBP_REGULATION_OF_ATPASE_ACTIVITY	GOBP_REGULATION_OF_ATPASE_ACTIVITY	1.17459	0.0150557	0.18258	DNAJC19,RAB3A,DYNLL1,PPIF,GABARAPL2,ATP5IF1,ATP1B1,PFN1,PFN2,PLN,TNNT2,DNAJA2
3.AD/1.YC	GABA_neurons	Down	GO BP	GOBP_ASSOCIATIVE_LEARNING	GOBP_ASSOCIATIVE_LEARNING	1.30337	0.0154389	0.184551	ACTR2,CRH,TAC1,CDK5,MEIS2,NDRG4,TPBG,TBR1,CCK,SNAP25,NRGN
3.AD/1.YC	GABA_neurons	Down	GO BP	GOBP_ERROR_PRONE_TRANSLESION_SYNTHESIS	GOBP_ERROR_PRONE_TRANSLESION_SYNTHESIS	1.99555	0.0155223	0.184551	UBB,RPS27A,UBA52,UBC,RPA3
3.AD/1.YC	GABA_neurons	Down	GO BP	GOBP_VESICLE_FUSION_TO_PLASMA_MEMBRANE	GOBP_VESICLE_FUSION_TO_PLASMA_MEMBRANE	1.99555	0.0155223	0.184551	RAB3A,SNAP25,SNAP47,STX19,STX1A
3.AD/1.YC	GABA_neurons	Down	GO BP	GOBP_CHONDROITIN_SULFATE_CATABOLIC_PROCESS	GOBP_CHONDROITIN_SULFATE_CATABOLIC_PROCESS	2.35062	0.0155572	0.184551	DCN,CSPG5,NCAN,BCAN
3.AD/1.YC	GABA_neurons	Down	GO BP	GOBP_MAINTENANCE_OF_PROTEIN_LOCALIZATION_IN_ENDOPLASMIC_RETICULUM	GOBP_MAINTENANCE_OF_PROTEIN_LOCALIZATION_IN_ENDOPLASMIC_RETICULUM	2.35062	0.0155572	0.184551	HSPA5,INSIG1,KDELR2,KDELR3
3.AD/1.YC	GABA_neurons	Down	GO BP	GOBP_PROTON_TRANSPORTING_TWO_SECTOR_ATPASE_COMPLEX_ASSEMBLY	GOBP_PROTON_TRANSPORTING_TWO_SECTOR_ATPASE_COMPLEX_ASSEMBLY	2.35062	0.0155572	0.184551	PIP4P1,ATP5F1D,TMEM199,TMEM70
3.AD/1.YC	GABA_neurons	Down	GO BP	GOBP_POSITIVE_REGULATION_OF_PROTEIN_EXIT_FROM_ENDOPLASMIC_RETICULUM	GOBP_POSITIVE_REGULATION_OF_PROTEIN_EXIT_FROM_ENDOPLASMIC_RETICULUM	2.35062	0.0155572	0.184551	BCAP31,CD81,TMEM30A,SEC16B
3.AD/1.YC	GABA_neurons	Down	GO BP	GOBP_REGULATION_OF_IRE1_MEDIATED_UNFOLDED_PROTEIN_RESPONSE	GOBP_REGULATION_OF_IRE1_MEDIATED_UNFOLDED_PROTEIN_RESPONSE	2.35062	0.0155572	0.184551	HSPA5,COPS5,DNAJB9,TMEM33
3.AD/1.YC	GABA_neurons	Down	GO BP	GOBP_NEGATIVE_REGULATION_OF_FATTY_ACID_TRANSPORT	GOBP_NEGATIVE_REGULATION_OF_FATTY_ACID_TRANSPORT	2.35062	0.0155572	0.184551	ARL6IP5,THBS1,ADORA1,FIS1
3.AD/1.YC	GABA_neurons	Down	GO BP	GOBP_POSITIVE_REGULATION_OF_CALCIUM_ION_TRANSMEMBRANE_TRANSPORTER_ACTIVITY	GOBP_POSITIVE_REGULATION_OF_CALCIUM_ION_TRANSMEMBRANE_TRANSPORTER_ACTIVITY	1.57508	0.0160251	0.188885	CDK5,CALM1,CALM3,CALM2,ATP1B1,GSTO1,JPH2
3.AD/1.YC	GABA_neurons	Down	GO BP	GOBP_REGULATION_OF_SYNAPSE_STRUCTURE_OR_ACTIVITY	GOBP_REGULATION_OF_SYNAPSE_STRUCTURE_OR_ACTIVITY	0.778643	0.0160266	0.188885	ACTR2,LRRK2,CDK5,TPBG,CFL1,TUBA1A,CDK5R1,VPS35,HSPA8,SLITRK4,FLRT3,NGEF,ITPKA,BDNF,SLIT1,SLITRK2,PCDH8,IL1RAP,HOMER1,CAMK1,CBLN1,SLC17A7,SLC17A6,CAMKV,CBLN2
3.AD/1.YC	GABA_neurons	Down	GO BP	GOBP_POSITIVE_REGULATION_OF_CALCIUM_ION_TRANSMEMBRANE_TRANSPORT	GOBP_POSITIVE_REGULATION_OF_CALCIUM_ION_TRANSMEMBRANE_TRANSPORT	1.27829	0.0161163	0.189532	CDK5,CX3CL1,CALM1,CALM3,THY1,CALM2,ATP1B1,CEMIP,GSTO1,NPSR1,JPH2
3.AD/1.YC	GABA_neurons	Down	GO BP	GOBP_CARBOHYDRATE_DERIVATIVE_METABOLIC_PROCESS	GOBP_CARBOHYDRATE_DERIVATIVE_METABOLIC_PROCESS	0.387534	0.0163105	0.191403	PPARGC1A,GNPDA1,PARK7,LRRK2,DCN,B4GALNT1,HMGCS1,PSAP,BMPR1B,ACSL6,ATP6V0C,RAN,HTR2A,PINK1,GAPDH,PGLYRP1,UGP2,B3GALNT1,B3GALT2,LDHA,UST,CSPG5,NCAN,BCAN,XYLT1,ADAMTS12,PAPSS2,ATP5F1B,ST3GAL1,GCNT4,ALDH1A1,ATP5F1A,TMSB4X,ACSM6,MPC2,NME1,NME2,DAD1,CTSL,ALDOC,STOML2,ASAH1,PGAM1,PKM,ITM2A,CEMIP,CEMIP2,PGK1,ANTKMT,HMGCR,NAGPA,ENO2,GALT,GBGT1,PDHB,PFKM,RPE,TPI1,CHST1,CHST10,B4GAT1,HS3ST2,HS3ST1,EXTL2,MDP…
3.AD/1.YC	GABA_neurons	Down	GO BP	GOBP_ENDOTHELIAL_CELL_CHEMOTAXIS	GOBP_ENDOTHELIAL_CELL_CHEMOTAXIS	1.73544	0.0164689	0.192431	MET,THBS1,SMOC2,CCN3,EGR3,TMSB4X
3.AD/1.YC	GABA_neurons	Down	GO BP	GOBP_REGULATION_OF_ENDOPLASMIC_RETICULUM_UNFOLDED_PROTEIN_RESPONSE	GOBP_REGULATION_OF_ENDOPLASMIC_RETICULUM_UNFOLDED_PROTEIN_RESPONSE	1.73544	0.0164689	0.192431	HSPA5,COPS5,RACK1,XBP1,DNAJB9,TMEM33
3.AD/1.YC	GABA_neurons	Down	GO BP	GOBP_LIMBIC_SYSTEM_DEVELOPMENT	GOBP_LIMBIC_SYSTEM_DEVELOPMENT	1.09308	0.0165523	0.192992	CRH,UBB,CDK5,NEFL,CDK5R1,TBR1,BCAN,SLC32A1,KCNA1,NME1,CDK5R2,ALDH1A3,UQCRQ,NEUROD6
3.AD/1.YC	GABA_neurons	Down	GO BP	GOBP_POSITIVE_REGULATION_OF_TRANSPORTER_ACTIVITY	GOBP_POSITIVE_REGULATION_OF_TRANSPORTER_ACTIVITY	1.00006	0.0168357	0.195459	PARK7,CDK5,PINK1,CALM1,CALM3,CALM2,KCNA1,ATP1B1,TMSB4X,GLRX,ANTKMT,GSTO1,LRRC38,JPH2,SYNGR3
3.AD/1.YC	GABA_neurons	Down	GO BP	GOBP_NEGATIVE_REGULATION_OF_TRANSMEMBRANE_TRANSPORT	GOBP_NEGATIVE_REGULATION_OF_TRANSMEMBRANE_TRANSPORT	1.00006	0.0168357	0.195459	ISCU,ARL6IP5,ADRA2A,RGS4,THBS1,CALM1,HECW1,PRKCB,CALM3,PPIF,VDAC1,CALM2,PLN,GSTO1,OAZ1
3.AD/1.YC	GABA_neurons	Down	GO BP	GOBP_POSITIVE_REGULATION_OF_CATION_CHANNEL_ACTIVITY	GOBP_POSITIVE_REGULATION_OF_CATION_CHANNEL_ACTIVITY	1.25354	0.0169176	0.195992	CDK5,PINK1,CALM1,CALM3,CALM2,KCNA1,TMSB4X,ANTKMT,GSTO1,LRRC38,JPH2
3.AD/1.YC	GABA_neurons	Down	GO BP	GOBP_REGULATION_OF_SMALL_MOLECULE_METABOLIC_PROCESS	GOBP_REGULATION_OF_SMALL_MOLECULE_METABOLIC_PROCESS	0.587917	0.0170219	0.196579	PPARGC1A,PARK7,EGR1,HMGCS1,SOD1,RAN,NR4A3,HTR2A,PSMA3,PSMA7,PSMB1,PSMB3,PSMB6,PSMB10,PSMC3,PSMC5,PSMD2,PSMD7,PSMD8,PINK1,PSMD6,PPP1CA,ARPP19,HPCA,INSIG1,PTGS2,TMSB4X,PGAM1,ANTKMT,FAM3C,CYP51A1,HMGCR,GNB3,COQ3,RUBCNL,PMVK,FDPS,FMO5,IDI1,TM7SF2,FABP3,OAZ1,AZIN1,PDP1
3.AD/1.YC	GABA_neurons	Down	GO BP	GOBP_NEGATIVE_REGULATION_OF_INTRACELLULAR_TRANSPORT	GOBP_NEGATIVE_REGULATION_OF_INTRACELLULAR_TRANSPORT	1.32186	0.0171127	0.196579	PARK7,LRRK2,CDK5,TXN,MDFIC,INSIG1,PLN,ERLEC1,CABP1
3.AD/1.YC	GABA_neurons	Down	GO BP	GOBP_MITOCHONDRIAL_OUTER_MEMBRANE_PERMEABILIZATION	GOBP_MITOCHONDRIAL_OUTER_MEMBRANE_PERMEABILIZATION	1.32186	0.0171127	0.196579	VDAC2,YWHAB,ATP5IF1,YWHAH,CHCHD10,MOAP1,SLC25A5,TMEM14A,RHOT2
3.AD/1.YC	GABA_neurons	Down	GO BP	GOBP_DIVALENT_INORGANIC_CATION_HOMEOSTASIS	GOBP_DIVALENT_INORGANIC_CATION_HOMEOSTASIS	0.540701	0.0172216	0.197414	BCAP31,EDN1,PDGFRA,TAC1,TRPC3,CALR,TMEM203,SLC39A6,SLC30A3,SLC39A7,CDK5,SMAD3,TMBIM6,CD24,GNG3,HTR2A,CAMK2N1,CX3CL1,CALM1,ADORA1,FIS1,PRKCB,CALM3,FKBP1A,THY1,CALM2,ATP2B1,ATP2A2,TSPOAP1,KCNA1,ATP1B1,CALB1,NMU,SELENOT,LPAR6,STOML2,SELENOK,FAM20A,CEMIP,PLN,HSP90B1,GPR17,GSTO1,GOT1,NPSR1,JPH2,SMDT1,MTLN,CCR10,GRINA
3.AD/1.YC	GABA_neurons	Down	GO BP	GOBP_PROTEIN_FOLDING	GOBP_PROTEIN_FOLDING	0.775252	0.0178773	0.204071	CCT7,CCT2,DNAJC19,HSPA5,HSP90AB1,CALR,ERP29,PPIA,PPIF,HSPA8,FKBP1A,PPIB,TBCC,PDCD5,HSP90B1,PDIA3,GNB3,CCT6A,DNAJA2,NUDCD2,DNAJB5,HSPA14,PFDN5,BAG1,HSPA13,VBP1
3.AD/1.YC	GABA_neurons	Down	GO BP	GOBP_REGULATION_OF_MUSCLE_SYSTEM_PROCESS	GOBP_REGULATION_OF_MUSCLE_SYSTEM_PROCESS	0.76034	0.018453	0.209327	PPARGC1A,EDN1,SOD1,SSTR2,TRPC3,SMAD3,NR4A3,MLIP,ADRA2A,PIN1,RGS4,CALM1,ADORA1,CALM3,C12ORF57,CALM2,ATP2B1,ATP2A2,KCNA1,ATP1A1,ATP1B1,NMU,CHGA,PLN,TNNT2,GSTO1
3.AD/1.YC	GABA_neurons	Down	GO BP	GOBP_CELL_CELL_SIGNALING_BY_WNT	GOBP_CELL_CELL_SIGNALING_BY_WNT	0.530798	0.0186192	0.2099	LRRK2,EGR1,UBB,ATP6V0C,SMAD3,NR4A2,PPM1A,RPS27A,UBA52,UBC,CD24,ATP6AP2,MDFIC,PIN1,PSMA3,PSMA7,PSMB1,PSMB3,PSMB6,PSMB10,PSMC3,PSMC5,PSMD2,PSMD7,PSMD8,SKP1,CALM1,PSMD6,HECW1,SIAH2,SPEF1,VPS35,PPP1CA,LRP5,CAMK2A,WDR61,RACK1,MESP1,ILK,FRZB,RSPO2,LRRK1,PFN1,AP2M1,AP2S1,PRICKLE1,FZD6,CPE,PFDN5,TRABD2A,TMEM198
3.AD/1.YC	GABA_neurons	Down	GO BP	GOBP_PLASMINOGEN_ACTIVATION	GOBP_PLASMINOGEN_ACTIVATION	1.9078	0.0189108	0.211002	SERPINE2,MELTF,THBS1,PGK1,F12
3.AD/1.YC	GABA_neurons	Down	GO BP	GOBP_ERROR_FREE_TRANSLESION_SYNTHESIS	GOBP_ERROR_FREE_TRANSLESION_SYNTHESIS	1.9078	0.0189108	0.211002	UBB,RPS27A,UBA52,UBC,RPA3
3.AD/1.YC	GABA_neurons	Down	GO BP	GOBP_NEGATIVE_REGULATION_OF_BLOOD_CIRCULATION	GOBP_NEGATIVE_REGULATION_OF_BLOOD_CIRCULATION	1.9078	0.0189108	0.211002	TAC1,ADORA1,ATP2A2,ATP1A1,PLN
3.AD/1.YC	GABA_neurons	Down	GO BP	GOBP_POSITIVE_REGULATION_OF_APOPTOTIC_SIGNALING_PATHWAY	GOBP_POSITIVE_REGULATION_OF_APOPTOTIC_SIGNALING_PATHWAY	0.992188	0.0190305	0.211904	BCAP31,PARK7,BMPR1B,SOD1,UBB,RPL11,RPL26,RPS3,THBS1,RPS7,FIS1,PPP1CA,RACK1,SERINC3,PDIA3,ITM2C
3.AD/1.YC	GABA_neurons	Down	GO BP	GOBP_POSITIVE_REGULATION_OF_WOUND_HEALING	GOBP_POSITIVE_REGULATION_OF_WOUND_HEALING	1.29088	0.0191133	0.212391	ADRA2A,PRDX2,THBS1,SMOC2,XBP1,ACTG1,F3,MYLK,F12
3.AD/1.YC	GABA_neurons	Down	GO BP	GOBP_SULFUR_COMPOUND_METABOLIC_PROCESS	GOBP_SULFUR_COMPOUND_METABOLIC_PROCESS	0.604308	0.0192829	0.212745	PARK7,DCN,HMGCS1,SOD1,ACSL6,ISCU,NOX4,ARL6IP5,UST,CSPG5,NCAN,BCAN,XYLT1,PAPSS2,PDZD11,ST3GAL1,ACSM6,PTGES2,MPC2,GGCT,MICAL2,GLRX5,GSTO1,PDHB,CHST1,B4GAT1,PMVK,SULT4A1,MGST3,PDP1,ACOT6,TDO2,EEF1G,GSTK1,MAT2B,TSTD1,ARSG,CIAO2B,ISCA1
3.AD/1.YC	GABA_neurons	Down	GO BP	GOBP_RESPONSE_TO_ARSENIC_CONTAINING_SUBSTANCE	GOBP_RESPONSE_TO_ARSENIC_CONTAINING_SUBSTANCE	1.67396	0.0193512	0.212745	SERPINF1,NEFL,PPIF,HNRNPA1,GSTO1,ZFAND1
3.AD/1.YC	GABA_neurons	Down	GO BP	GOBP_POSITIVE_REGULATION_OF_PROTEIN_TARGETING_TO_MEMBRANE	GOBP_POSITIVE_REGULATION_OF_PROTEIN_TARGETING_TO_MEMBRANE	1.67396	0.0193512	0.212745	CDK5,CDK5R1,FIS1,MFF,HPCA,CEMIP
3.AD/1.YC	GABA_neurons	Down	GO BP	GOBP_REGULATION_OF_PRESYNAPSE_ORGANIZATION	GOBP_REGULATION_OF_PRESYNAPSE_ORGANIZATION	1.67396	0.0193512	0.212745	VPS35,SLITRK4,SLITRK2,IL1RAP,CBLN1,CBLN2
3.AD/1.YC	GABA_neurons	Down	GO BP	GOBP_POSITIVE_REGULATION_OF_CATION_TRANSMEMBRANE_TRANSPORT	GOBP_POSITIVE_REGULATION_OF_CATION_TRANSMEMBRANE_TRANSPORT	0.942576	0.0193701	0.212745	CDK5,CX3CL1,PINK1,CALM1,ARF1,CALM3,THY1,CALM2,KCNA1,ATP1B1,TMSB4X,CEMIP,GLRX,ANTKMT,GSTO1,LRRC38,NPSR1,JPH2
3.AD/1.YC	GABA_neurons	Down	GO BP	GOBP_REGULATION_OF_TRANSFERASE_ACTIVITY	GOBP_REGULATION_OF_TRANSFERASE_ACTIVITY	0.394337	0.0193795	0.212745	CCT2,PARK7,PHB2,LRRK2,EDN1,EGR1,HSP90AB1,PDGFRA,PRKAR1A,ROS1,SOD1,TYRO3,UBB,RPL5,RPL11,TTN,CDK5,NOX4,HEXIM2,RPS27A,TXN,UBA52,UBC,LDB2,RPL23,SPRY2,CD24,RASGRP1,CAMKK2,ERP29,DUSP14,ADRA2A,SPRED1,GNG3,LAMTOR2,MDFIC,HTR2A,ARAF,MET,PIN1,PPIA,STRADB,CAMK2N1,RGS4,RPS3,SKP1,PINK1,PRDX2,THBS1,UBE2V1,UCHL1,YWHAB,CALM1,CD81,RPLP1,RPS2,RPS7,ADORA1,CARTPT,STUB1,UBE2S,CDK5R1,TOM1L1,CDKN2D,JTB,ECT2,LRP5,CALM3,R…
3.AD/1.YC	GABA_neurons	Down	GO BP	GOBP_POTASSIUM_ION_TRANSPORT	GOBP_POTASSIUM_ION_TRANSPORT	0.73825	0.0196324	0.214656	VIP,KCNIP3,ADRA2A,HTR2A,RGS4,ADORA1,SNAP25,KCNA1,KCNA2,ATP1A1,ATP1B1,CD63,ABCC9,KCNS3,KCNJ4,DPP10,LRRC38,KCNH4,KCNH3,KCNV1,KCNF1,KCNS1,KCNS2,KCNK12,SLC12A5,SLC12A4
[truncated: 31 more rows]
