# Supplementary material for: A roadmap to human hippocampal neurogenesis in adulthood, aging and AD.
Source: Research Square preprint supplement (doi:10.21203/rs.3.rs-4469965/v1), 2024-05-30
Supplement: Supplementary file 13 [file d389b1b6b938d4b483ded398.xlsx]

## Sheet: signif_summary
Contrast	Cluster	Total	Up	Down
Diagnosis	Immature	4005	0	0
1.YC/0.HA	Immature	71	55	16
3.AD/0.HA	Immature	41341	94	41247
3.AD/1.YC	Immature	67532	67	67465
Diagnosis	Neural Stem	13	0	0
1.YC/0.HA	Neural Stem	21	21	0
3.AD/1.YC	Neural Stem	1589	159	1430
3.AD/2.MCI	Neural Stem	1	1	0
CODE	Acronym in manuscript
HA	NCI
YC	YA
MCI	MCI
AD	AD

## Sheet: signif
ID	Promoter (2 kb upstream to 2 kb downstream)	Gene Body	log2FC	log2CPM	PValue	QValue	Contrast	Cluster
chr1:629634-630496					2.5252e-05	0.171004	Diagnosis	Immature
chr1:1019222-1020031	ENSG00000188157_AGRN,-89				0.000558243	0.171004	Diagnosis	Immature
chr1:1032653-1033515		ENSG00000188157_AGRN,12533			0.00140586	0.182371	Diagnosis	Immature
chr1:1298634-1299528		ENSG00000131584_ACAP3,10081			0.000437863	0.171004	Diagnosis	Immature
chr1:1307746-1308701	ENSG00000169972_PUSL1,0;ENSG00000131584_ACAP3,908	ENSG00000169972_PUSL1,0;ENSG00000131584_ACAP3,908			0.000155369	0.171004	Diagnosis	Immature
chr1:1511531-1512405	ENSG00000197785_ATAD3A,0	ENSG00000197785_ATAD3A,0			0.0018344	0.184273	Diagnosis	Immature
chr1:1615135-1615930	ENSG00000197530_MIB2,0;ENSG00000272106_AL691432.2,0	ENSG00000272106_AL691432.2,0;ENSG00000197530_MIB2,0			0.00410668	0.21212	Diagnosis	Immature
chr1:1692390-1693344	ENSG00000189339_SLC35E2B,0	ENSG00000189339_SLC35E2B,0			0.000999223	0.17652	Diagnosis	Immature
chr1:1723967-1724885	ENSG00000008128_CDK11A,0	ENSG00000008128_CDK11A,0;ENSG00000215790_SLC35E2A,21114			0.00832794	0.244261	Diagnosis	Immature
chr1:1778003-1778865	ENSG00000008130_NADK,1592	ENSG00000008130_NADK,1592			0.00687466	0.237552	Diagnosis	Immature
chr1:1908720-1909609					0.00547814	0.224691	Diagnosis	Immature
chr1:2204724-2205605		ENSG00000162585_FAAP20,7115			0.00159503	0.182746	Diagnosis	Immature
chr1:3012163-3012978					0.00240903	0.193625	Diagnosis	Immature
chr1:3352265-3353147		ENSG00000142611_PRDM16,283097			0.00741995	0.240119	Diagnosis	Immature
chr1:6497030-6497946		ENSG00000171680_PLEKHG5,22115			0.00727739	0.239479	Diagnosis	Immature
chr1:6602532-6603442		ENSG00000162413_KLHL21,11165			0.000355629	0.171004	Diagnosis	Immature
chr1:6613077-6613942	ENSG00000116273_PHF13,0;ENSG00000162413_KLHL21,665	ENSG00000116273_PHF13,0;ENSG00000162413_KLHL21,665			7.44152e-05	0.171004	Diagnosis	Immature
chr1:6784766-6785588	ENSG00000237436_CAMTA1-DT,0;ENSG00000171735_CAMTA1,0	ENSG00000237436_CAMTA1-DT,0;ENSG00000171735_CAMTA1,0			0.0084197	0.244479	Diagnosis	Immature
chr1:7704224-7705130		ENSG00000171735_CAMTA1,918770			0.000140351	0.171004	Diagnosis	Immature
chr1:7783608-7784535	ENSG00000049246_PER3,0	ENSG00000049246_PER3,0			0.00274975	0.196728	Diagnosis	Immature
chr1:7961148-7962045		ENSG00000116288_PARK7,6857			0.0049684	0.220812	Diagnosis	Immature
chr1:8702937-8703866		ENSG00000142599_RERE,145055			0.00159605	0.182746	Diagnosis	Immature
chr1:9292392-9293297	ENSG00000171621_SPSB1,0	ENSG00000171621_SPSB1,0			0.00893793	0.24967	Diagnosis	Immature
chr1:9388138-9389010					0.0066452	0.235689	Diagnosis	Immature
chr1:9942921-9943797	ENSG00000228150_AL357140.2,0;ENSG00000162441_LZIC,0;ENSG00000173614_NMNAT1,0	ENSG00000162441_LZIC,0;ENSG00000228150_AL357140.2,0;ENSG00000173614_NMNAT1,0			0.00613371	0.23142	Diagnosis	Immature
chr1:10143801-10144661		ENSG00000130939_UBE4B,110969			0.0079067	0.242725	Diagnosis	Immature
chr1:10210017-10210916	ENSG00000054523_KIF1B,0	ENSG00000054523_KIF1B,0			0.00415783	0.212281	Diagnosis	Immature
chr1:10398494-10399400	ENSG00000142657_PGD,0	ENSG00000142657_PGD,0			0.00451664	0.215387	Diagnosis	Immature
chr1:11099351-11100256	ENSG00000230337_EXOSC10-AS1,0;ENSG00000171824_EXOSC10,0	ENSG00000171824_EXOSC10,0;ENSG00000230337_EXOSC10-AS1,0			0.00728588	0.239479	Diagnosis	Immature
chr1:11262195-11263106	ENSG00000198793_MTOR,0	ENSG00000198793_MTOR,0			0.000609459	0.171004	Diagnosis	Immature
chr1:11907583-11908421	ENSG00000285646_AL021155.5,0	ENSG00000285646_AL021155.5,0			0.000422628	0.171004	Diagnosis	Immature
chr1:11926019-11926921	ENSG00000116685_KIAA2013,0	ENSG00000116685_KIAA2013,0			0.00825099	0.244097	Diagnosis	Immature
chr1:11979816-11980737	ENSG00000287384_AL096840.2,0;ENSG00000116688_MFN2,0	ENSG00000287384_AL096840.2,0;ENSG00000116688_MFN2,0			0.000165206	0.171004	Diagnosis	Immature
chr1:14258930-14259867		ENSG00000231606_AL357873.1,44578;ENSG00000189337_KAZN,366138			0.00869891	0.24693	Diagnosis	Immature
chr1:15524268-15525005	ENSG00000116138_DNAJC16,-1808;ENSG00000132906_CASP9,1529	ENSG00000132906_CASP9,1529			0.00330281	0.203904	Diagnosis	Immature
chr1:15886020-15886871		ENSG00000065526_SPEN,38313			0.00873857	0.247083	Diagnosis	Immature
chr1:16055814-16056653		ENSG00000184908_CLCNKB,12078			0.00636041	0.233705	Diagnosis	Immature
chr1:16236737-16237539	ENSG00000132881_CPLANE2,0	ENSG00000132881_CPLANE2,0			0.00789187	0.242596	Diagnosis	Immature
chr1:16613099-16613992	ENSG00000219481_NBPF1,0	ENSG00000219481_NBPF1,0			0.000779252	0.174388	Diagnosis	Immature
chr1:16888976-16889837	ENSG00000238142_BX284668.5,0	ENSG00000238142_BX284668.5,0;ENSG00000058453_CROCC,148703			0.00601387	0.230409	Diagnosis	Immature
chr1:16904557-16905455	ENSG00000272426_BX284668.6,0	ENSG00000272426_BX284668.6,0;ENSG00000058453_CROCC,164284			7.81501e-05	0.171004	Diagnosis	Immature
chr1:16913612-16914520		ENSG00000058453_CROCC,173339			0.000442657	0.171004	Diagnosis	Immature
chr1:17053708-17054635	ENSG00000117118_SDHB,0	ENSG00000117118_SDHB,0			0.00629163	0.232935	Diagnosis	Immature
chr1:17657142-17658057		ENSG00000074964_ARHGEF10L,117444			0.00741164	0.240111	Diagnosis	Immature
chr1:18941126-18941885		ENSG00000169991_IFFO2,14791			0.00490762	0.220175	Diagnosis	Immature
chr1:19074882-19075798	ENSG00000272084_AL137127.1,0	ENSG00000272084_AL137127.1,0;ENSG00000127481_UBR4,134468			0.00862084	0.24598	Diagnosis	Immature
chr1:20786666-20787308	ENSG00000127483_HP1BP3,15	ENSG00000127483_HP1BP3,15			0.000875412	0.174388	Diagnosis	Immature
chr1:21345079-21345976	ENSG00000117298_ECE1,0	ENSG00000117298_ECE1,0			0.00594121	0.229995	Diagnosis	Immature
chr1:21607642-21608476		ENSG00000076864_RAP1GAP,60887			0.00404592	0.211609	Diagnosis	Immature
chr1:21658953-21659816		ENSG00000076864_RAP1GAP,9547			0.00471139	0.218574	Diagnosis	Immature
chr1:22052391-22053156	ENSG00000285752_CDC42-AS1,0	ENSG00000285752_CDC42-AS1,0;ENSG00000070831_CDC42,26880			0.00512716	0.221829	Diagnosis	Immature
chr1:22451544-22452365		ENSG00000184677_ZBTB40,22706			0.00100846	0.176647	Diagnosis	Immature
chr1:23368034-23368735	ENSG00000249087_ZNF436-AS1,-262;ENSG00000125945_ZNF436,1101	ENSG00000125945_ZNF436,1101			0.00119561	0.177939	Diagnosis	Immature
chr1:23368849-23369204	ENSG00000249087_ZNF436-AS1,0;ENSG00000125945_ZNF436,632	ENSG00000249087_ZNF436-AS1,0;ENSG00000125945_ZNF436,632			0.00857812	0.245483	Diagnosis	Immature
chr1:23466164-23467052		ENSG00000088280_ASAP3,17516			0.00755627	0.240176	Diagnosis	Immature
chr1:23790705-23791585	ENSG00000011009_LYPLA2,0	ENSG00000011009_LYPLA2,0			0.00413664	0.212281	Diagnosis	Immature
chr1:23825010-23825915		ENSG00000117305_HMGCL,12705			0.0081374	0.243514	Diagnosis	Immature
chr1:23979865-23980790	ENSG00000188529_SRSF10,137	ENSG00000188529_SRSF10,137			0.000747872	0.172121	Diagnosis	Immature
chr1:24415286-24416160	ENSG00000001461_NIPAL3,0;ENSG00000001460_STPG1,774	ENSG00000001461_NIPAL3,0;ENSG00000001460_STPG1,774			0.00142078	0.182371	Diagnosis	Immature
chr1:24502381-24503283	ENSG00000117602_RCAN3,30	ENSG00000117602_RCAN3,30;ENSG00000286061_RCAN3AS,32117			0.00645121	0.234533	Diagnosis	Immature
chr1:24642627-24643560		ENSG00000133226_SRRM1,10911			0.00222115	0.191381	Diagnosis	Immature
chr1:24744805-24745694	ENSG00000169504_CLIC4,0	ENSG00000169504_CLIC4,0			0.000366546	0.171004	Diagnosis	Immature
chr1:25563457-25564345		ENSG00000157978_LDLRAP1,19877			0.00172364	0.184273	Diagnosis	Immature
chr1:25875153-25876062					0.00390379	0.210573	Diagnosis	Immature
chr1:25997756-25998680	ENSG00000158006_PAFAH2,0	ENSG00000158006_PAFAH2,0			0.00210651	0.189995	Diagnosis	Immature
chr1:26021464-26022291	ENSG00000158008_EXTL1,1580	ENSG00000158008_EXTL1,1580			0.00791425	0.242725	Diagnosis	Immature
chr1:26472712-26473377	ENSG00000198830_HMGN2,272	ENSG00000198830_HMGN2,272			0.000648174	0.171004	Diagnosis	Immature
chr1:26555257-26556172		ENSG00000117676_RPS6KA1,25496			0.00336021	0.205115	Diagnosis	Immature
chr1:26692749-26693480	ENSG00000117713_ARID1A,0;ENSG00000260063_AL512408.1,651	ENSG00000117713_ARID1A,0;ENSG00000260063_AL512408.1,651			0.00610786	0.231401	Diagnosis	Immature
chr1:26993332-26994144	ENSG00000253368_TRNP1,0	ENSG00000253368_TRNP1,0			0.00856438	0.245406	Diagnosis	Immature
chr1:27154654-27155563		ENSG00000090020_SLC9A1,11418			0.00419882	0.212499	Diagnosis	Immature
chr1:27234080-27234986	ENSG00000224311_AL590640.1,0;ENSG00000142784_WDTC1,0	ENSG00000224311_AL590640.1,0;ENSG00000142784_WDTC1,0			0.000195394	0.171004	Diagnosis	Immature
chr1:27504880-27505642					0.00474833	0.219154	Diagnosis	Immature
chr1:27603689-27604517	ENSG00000126705_AHDC1,0	ENSG00000126705_AHDC1,0			0.00232118	0.193625	Diagnosis	Immature
chr1:28235628-28236528	ENSG00000130770_ATP5IF1,0	ENSG00000130770_ATP5IF1,0			0.000422377	0.171004	Diagnosis	Immature
chr1:28505481-28506337	ENSG00000180198_RCC1,0;ENSG00000242125_SNHG3,0	ENSG00000180198_RCC1,0;ENSG00000242125_SNHG3,0			0.00399198	0.211609	Diagnosis	Immature
chr1:28517846-28518764		ENSG00000180198_RCC1,11903			0.0070341	0.238109	Diagnosis	Immature
chr1:28668516-28669393	ENSG00000162419_GMEB1,0	ENSG00000162419_GMEB1,0			0.00616793	0.231627	Diagnosis	Immature
chr1:28914069-28914949		ENSG00000159023_EPB41,26978			0.00627998	0.232881	Diagnosis	Immature
chr1:29181515-29182320	ENSG00000116350_SRSF4,0	ENSG00000116350_SRSF4,0			0.00762669	0.240176	Diagnosis	Immature
chr1:30879867-30880515		ENSG00000162512_SDC3,28243			0.0046235	0.217218	Diagnosis	Immature
chr1:31065333-31066181	ENSG00000134644_PUM1,0	ENSG00000134644_PUM1,0			0.00303279	0.199762	Diagnosis	Immature
chr1:31372965-31373683		ENSG00000121769_FABP3,3167			0.00453664	0.215877	Diagnosis	Immature
chr1:31736469-31737386		ENSG00000121753_ADGRB2,27507			0.00703368	0.238109	Diagnosis	Immature
chr1:31842724-31843609		ENSG00000203620_AL354919.1,11959			0.00241193	0.193625	Diagnosis	Immature
chr1:31938014-31938750		ENSG00000184007_PTP4A2,6106			0.00063925	0.171004	Diagnosis	Immature
chr1:32013273-32014135	ENSG00000121774_KHDRBS1,0	ENSG00000121774_KHDRBS1,0			0.00700566	0.237986	Diagnosis	Immature
chr1:32072624-32073532	ENSG00000203325_AL445248.1,0;ENSG00000121775_TMEM39B,593	ENSG00000203325_AL445248.1,0;ENSG00000121775_TMEM39B,593			0.000180457	0.171004	Diagnosis	Immature
chr1:32361765-32362590	ENSG00000225828_FAM229A,1688	ENSG00000225828_FAM229A,1688;ENSG00000162526_TSSK3,10244			0.00836572	0.244285	Diagnosis	Immature
chr1:32464489-32465385	ENSG00000273274_ZBTB8B,0	ENSG00000273274_ZBTB8B,0			0.00399592	0.211609	Diagnosis	Immature
chr1:32753526-32754388		ENSG00000162522_KIAA1522,11696			0.00155061	0.182746	Diagnosis	Immature
chr1:32886094-32887016	ENSG00000121905_HPCA,100	ENSG00000121905_HPCA,100			0.0058564	0.229278	Diagnosis	Immature
chr1:32939472-32940379		ENSG00000287691_AL031602.2,14018;ENSG00000116514_RNF19B,24306			0.000332662	0.171004	Diagnosis	Immature
chr1:33180476-33181370	ENSG00000116525_TRIM62,689	ENSG00000116525_TRIM62,689			0.00432131	0.212666	Diagnosis	Immature
chr1:33181663-33182526	ENSG00000116525_TRIM62,0	ENSG00000116525_TRIM62,0			0.00876482	0.247564	Diagnosis	Immature
chr1:33349442-33350312	ENSG00000233246_AL513327.2,-40	ENSG00000134686_PHC2,80740			0.000598595	0.171004	Diagnosis	Immature
chr1:33430630-33431460	ENSG00000134686_PHC2,0	ENSG00000134686_PHC2,0			0.00101456	0.176647	Diagnosis	Immature
chr1:33472068-33472980	ENSG00000121903_ZSCAN20,0	ENSG00000121903_ZSCAN20,0			0.000853117	0.174388	Diagnosis	Immature
chr1:34050794-34051650		ENSG00000121904_CSMD2,114192			0.00201596	0.187052	Diagnosis	Immature
chr1:35557128-35557996	ENSG00000020129_NCDN,0;ENSG00000142687_KIAA0319L,0	ENSG00000142687_KIAA0319L,0;ENSG00000020129_NCDN,0			0.000105274	0.171004	Diagnosis	Immature
chr1:35769479-35770267	ENSG00000092853_CLSPN,0	ENSG00000092853_CLSPN,0			0.00166436	0.184273	Diagnosis	Immature
chr1:35930575-35931492	ENSG00000271914_AL139286.2,-460;ENSG00000126070_AGO3,0	ENSG00000126070_AGO3,0			0.00155	0.182746	Diagnosis	Immature
chr1:36067601-36068392		ENSG00000126070_AGO3,136883			0.00632144	0.233135	Diagnosis	Immature
chr1:36088426-36089357	ENSG00000116863_ADPRHL2,0	ENSG00000116863_ADPRHL2,0			0.00367771	0.209039	Diagnosis	Immature
chr1:36385563-36386468	ENSG00000196182_STK40,0	ENSG00000196182_STK40,0			5.25001e-05	0.171004	Diagnosis	Immature
chr1:36397397-36398241	ENSG00000181817_LSM10,0	ENSG00000181817_LSM10,0			0.00501354	0.221118	Diagnosis	Immature
chr1:37391182-37391986		ENSG00000233621_LINC01137,82425			0.00728298	0.239479	Diagnosis	Immature
chr1:37402765-37403660		ENSG00000233621_LINC01137,70751			0.0047751	0.219422	Diagnosis	Immature
chr1:37514323-37515204	ENSG00000163875_MEAF6,0	ENSG00000163875_MEAF6,0			0.00486893	0.220175	Diagnosis	Immature
chr1:37691880-37692786	ENSG00000116922_C1orf109,0;ENSG00000134690_CDCA8,0	ENSG00000116922_C1orf109,0;ENSG00000134690_CDCA8,0			0.00042297	0.171004	Diagnosis	Immature
chr1:37752569-37753441		ENSG00000183317_EPHA10,11692			0.00729475	0.239513	Diagnosis	Immature
chr1:38012183-38013096		ENSG00000183520_UTP11,2925			0.00433079	0.21268	Diagnosis	Immature
chr1:38859360-38860258	ENSG00000116954_RRAGC,0;ENSG00000228436_AL139260.1,0	ENSG00000116954_RRAGC,0;ENSG00000228436_AL139260.1,0			0.0010871	0.17692	Diagnosis	Immature
chr1:39262395-39263214		ENSG00000127603_MACF1,181079			0.00527473	0.223054	Diagnosis	Immature
chr1:39691197-39692005	ENSG00000084072_PPIE,-177;ENSG00000116983_HPCAL4,0	ENSG00000116983_HPCAL4,0			0.00119269	0.177939	Diagnosis	Immature
chr1:40040144-40041024	ENSG00000131236_CAP1,0	ENSG00000131236_CAP1,0			0.00308303	0.200127	Diagnosis	Immature
chr1:40160961-40161805	ENSG00000117000_RLF,0	ENSG00000117000_RLF,0			0.00183452	0.184273	Diagnosis	Immature
chr1:40316339-40317207	ENSG00000049089_COL9A2,606	ENSG00000049089_COL9A2,606			0.00187705	0.184273	Diagnosis	Immature
chr1:40476971-40477808	ENSG00000187815_ZFP69,0	ENSG00000187815_ZFP69,0			0.00705272	0.238159	Diagnosis	Immature
chr1:40691551-40692331	ENSG00000066136_NFYC,0;ENSG00000272145_NFYC-AS1,0	ENSG00000272145_NFYC-AS1,0;ENSG00000066136_NFYC,0			0.000585647	0.171004	Diagnosis	Immature
chr1:40820747-40821626		ENSG00000117013_KCNQ4,36960			0.00496456	0.220812	Diagnosis	Immature
chr1:41775639-41776352		ENSG00000127124_HIVEP3,259573			0.00377385	0.209409	Diagnosis	Immature
chr1:42766675-42767578	ENSG00000117385_P3H1,0;ENSG00000164008_C1orf50,0	ENSG00000117385_P3H1,0;ENSG00000164008_C1orf50,0			0.00275721	0.196728	Diagnosis	Immature
chr1:43147386-43148293		ENSG00000186973_FAM183A,2233			0.00813664	0.243514	Diagnosis	Immature
chr1:43367664-43368598	ENSG00000066322_ELOVL1,0	ENSG00000066322_ELOVL1,0			0.00131476	0.181017	Diagnosis	Immature
chr1:43541826-43542687		ENSG00000142949_PTPRF,16639			0.00509002	0.221693	Diagnosis	Immature
chr1:43969451-43970369	ENSG00000132768_DPH2,0	ENSG00000132768_DPH2,0;ENSG00000285649_AL357079.2,4452			0.00148228	0.182371	Diagnosis	Immature
chr1:44354830-44355734	ENSG00000117419_ERI3,0	ENSG00000117419_ERI3,0			0.000793814	0.174388	Diagnosis	Immature
chr1:44380293-44381226					0.00873682	0.247083	Diagnosis	Immature
chr1:44500627-44501447		ENSG00000187147_RNF220,95433			0.00248335	0.193871	Diagnosis	Immature
chr1:44591936-44592811		ENSG00000187147_RNF220,186742			0.00683958	0.237552	Diagnosis	Immature
chr1:44631600-44632551		ENSG00000187147_RNF220,226406			0.00268575	0.196448	Diagnosis	Immature
chr1:44739289-44740191	ENSG00000142945_KIF2C,0	ENSG00000142945_KIF2C,0			0.0057101	0.226738	Diagnosis	Immature
chr1:44986174-44987062	ENSG00000070785_EIF2B3,0	ENSG00000070785_EIF2B3,0			0.00753148	0.240176	Diagnosis	Immature
chr1:45303372-45304250	ENSG00000281912_LINC01144,0;ENSG00000162415_ZSWIM5,1959	ENSG00000281912_LINC01144,0;ENSG00000162415_ZSWIM5,1959			0.0036303	0.208274	Diagnosis	Immature
chr1:45339686-45340614	ENSG00000132773_TOE1,0;ENSG00000132781_MUTYH,279	ENSG00000132773_TOE1,0;ENSG00000132781_MUTYH,279			0.00184205	0.184273	Diagnosis	Immature
chr1:45490776-45491675	ENSG00000070759_TESK2,0	ENSG00000070759_TESK2,0			0.0019041	0.185015	Diagnosis	Immature
chr1:45550410-45551343	ENSG00000117448_AKR1A1,0	ENSG00000117448_AKR1A1,0			0.00405445	0.211609	Diagnosis	Immature
chr1:45750236-45751139	ENSG00000197429_IPP,0	ENSG00000197429_IPP,0			0.00159168	0.182746	Diagnosis	Immature
chr1:46132460-46133388	ENSG00000227857_AL358075.2,-1143;ENSG00000117461_PIK3R3,0	ENSG00000117461_PIK3R3,0			0.00082674	0.174388	Diagnosis	Immature
chr1:46198031-46198945		ENSG00000085998_POMGNT1,21360			0.00502189	0.22118	Diagnosis	Immature
chr1:46202834-46203747	ENSG00000171357_LURAP1,0	ENSG00000171357_LURAP1,0;ENSG00000085998_POMGNT1,16558			0.00408659	0.21197	Diagnosis	Immature
chr1:46667948-46668835	ENSG00000186118_TEX38,-20	ENSG00000123472_ATPAF1,5032			0.00464732	0.217535	Diagnosis	Immature
chr1:48493958-48494868					0.00331477	0.204188	Diagnosis	Immature
chr1:52033223-52034064	ENSG00000223390_AL445685.1,0;ENSG00000198841_KTI12,0	ENSG00000198841_KTI12,0;ENSG00000223390_AL445685.1,0;ENSG00000117862_TXNDC12,22107			0.00523376	0.222892	Diagnosis	Immature
chr1:52054774-52055539	ENSG00000134717_BTF3L4,-660;ENSG00000117862_TXNDC12,632	ENSG00000117862_TXNDC12,632			0.00791147	0.242725	Diagnosis	Immature
chr1:52697895-52698814	ENSG00000162377_COA7,0	ENSG00000162377_COA7,0			0.00489741	0.220175	Diagnosis	Immature
chr1:52702774-52703648					0.00315347	0.200905	Diagnosis	Immature
chr1:53220107-53221019	ENSG00000162384_CZIB,0;ENSG00000259818_AL606760.3,0	ENSG00000162384_CZIB,0;ENSG00000259818_AL606760.3,0			0.00181956	0.184273	Diagnosis	Immature
chr1:53238144-53239064	ENSG00000162385_MAGOH,0;ENSG00000226754_AL606760.1,0	ENSG00000162385_MAGOH,0;ENSG00000226754_AL606760.1,0			0.00462195	0.217218	Diagnosis	Immature
chr1:53316022-53316833		ENSG00000157193_LRP8,11636			0.00753754	0.240176	Diagnosis	Immature
chr1:53945572-53946452	ENSG00000081870_HSPB11,0;ENSG00000116212_LRRC42,0	ENSG00000081870_HSPB11,0;ENSG00000116212_LRRC42,0			0.00272094	0.196728	Diagnosis	Immature
chr1:54764191-54765115	ENSG00000162396_PARS2,0	ENSG00000162396_PARS2,0			0.00848476	0.244827	Diagnosis	Immature
chr1:56644935-56645807	ENSG00000162407_PLPP3,0;ENSG00000162409_PRKAA2,0	ENSG00000162407_PLPP3,0;ENSG00000162409_PRKAA2,0			0.00757785	0.240176	Diagnosis	Immature
chr1:57908166-57909106		ENSG00000173406_DAB1,637628			0.0066321	0.235689	Diagnosis	Immature
chr1:58783710-58784617	ENSG00000234807_LINC01135,-511;ENSG00000177606_JUN,0	ENSG00000177606_JUN,0			0.00070874	0.171004	Diagnosis	Immature
chr1:59976453-59977313					0.00735164	0.240034	Diagnosis	Immature
chr1:60911709-60912620		ENSG00000162599_NFIA,46450			0.00753007	0.240176	Diagnosis	Immature
chr1:61268520-61269396		ENSG00000162599_NFIA,403261			0.00243561	0.193625	Diagnosis	Immature
chr1:61433756-61434632		ENSG00000162599_NFIA,568497			0.00795793	0.243415	Diagnosis	Immature
chr1:62436099-62436969	ENSG00000162607_USP1,0	ENSG00000162607_USP1,0			0.000265798	0.171004	Diagnosis	Immature
chr1:63111950-63112838					0.00821865	0.243792	Diagnosis	Immature
chr1:63593220-63594154	ENSG00000079739_PGM1,0;ENSG00000142856_ITGB3BP,0	ENSG00000142856_ITGB3BP,0;ENSG00000079739_PGM1,0			0.00181299	0.184273	Diagnosis	Immature
chr1:64966088-64966970		ENSG00000162434_JAK1,100784			0.00851209	0.244982	Diagnosis	Immature
chr1:65002368-65003258	ENSG00000226891_LINC01359,0;ENSG00000272506_AL357078.2,829	ENSG00000226891_LINC01359,0;ENSG00000162434_JAK1,64496			0.00615533	0.231554	Diagnosis	Immature
chr1:65066661-65067466	ENSG00000162434_JAK1,288	ENSG00000162434_JAK1,288			0.00126262	0.180247	Diagnosis	Immature
chr1:66924689-66925599	ENSG00000152763_WDR78,0;ENSG00000198160_MIER1,0	ENSG00000152763_WDR78,0;ENSG00000198160_MIER1,0			0.00258245	0.19538	Diagnosis	Immature
chr1:67430073-67430945	ENSG00000142864_SERBP1,0	ENSG00000142864_SERBP1,0			0.0039628	0.211609	Diagnosis	Immature
chr1:69567915-69568652	ENSG00000033122_LRRC7,0	ENSG00000033122_LRRC7,0			0.00414383	0.212281	Diagnosis	Immature
chr1:70221068-70221945	ENSG00000228988_AL353771.1,-45	ENSG00000116754_SRSF11,15386			0.00143622	0.182371	Diagnosis	Immature
chr1:72283564-72284318	ENSG00000172260_NEGR1,-1025;ENSG00000286863_AL513166.1,394	ENSG00000286863_AL513166.1,394			0.00767303	0.240734	Diagnosis	Immature
chr1:74197719-74198616	ENSG00000162620_LRRIQ3,0;ENSG00000254685_FPGT,0	ENSG00000162620_LRRIQ3,0;ENSG00000254685_FPGT,0			0.00408425	0.21197	Diagnosis	Immature
chr1:77682353-77682944	ENSG00000036549_AC118549.1,475	ENSG00000036549_AC118549.1,475			0.0071515	0.239088	Diagnosis	Immature
chr1:83960384-83961171		ENSG00000137941_TTLL7,37979			0.00898391	0.24992	Diagnosis	Immature
chr1:85134679-85135594					0.00362432	0.208274	Diagnosis	Immature
chr1:89566581-89567429		ENSG00000197147_LRRC8B,41745			0.00527329	0.223054	Diagnosis	Immature
chr1:89632635-89633511	ENSG00000231999_LRRC8C-DT,0;ENSG00000171488_LRRC8C,0	ENSG00000231999_LRRC8C-DT,0;ENSG00000171488_LRRC8C,0;ENSG00000230735_AC093423.2,2910			0.00144993	0.182371	Diagnosis	Immature
chr1:89994720-89995604	ENSG00000162664_ZNF326,0	ENSG00000162664_ZNF326,0			0.000676573	0.171004	Diagnosis	Immature
chr1:91021613-91022429	ENSG00000122482_ZNF644,0	ENSG00000122482_ZNF644,0			0.00577649	0.227797	Diagnosis	Immature
chr1:93180095-93180939	ENSG00000117500_TMED5,0;ENSG00000122483_CCDC18,176	ENSG00000117500_TMED5,0;ENSG00000122483_CCDC18,176			0.00772989	0.241215	Diagnosis	Immature
chr1:93878731-93879622	ENSG00000067334_DNTTIP2,296	ENSG00000067334_DNTTIP2,296			0.00663297	0.235689	Diagnosis	Immature
chr1:94247215-94248066	ENSG00000226835_ARHGAP29-AS1,0	ENSG00000226835_ARHGAP29-AS1,0;ENSG00000137962_ARHGAP29,27002			0.00104998	0.176647	Diagnosis	Immature
chr1:94926767-94927684	ENSG00000117519_CNN3,0;ENSG00000235501_AC105942.1,0	ENSG00000117519_CNN3,0;ENSG00000235501_AC105942.1,0			0.0074758	0.240176	Diagnosis	Immature
chr1:97145028-97145949		ENSG00000232878_DPYD-AS1,49105;ENSG00000188641_DPYD,849051			0.00576492	0.227797	Diagnosis	Immature
chr1:97920584-97921503		ENSG00000188641_DPYD,73497			0.00123389	0.179147	Diagnosis	Immature
chr1:100024229-100025100		ENSG00000117620_SLC35A3,54878			0.00648324	0.235082	Diagnosis	Immature
chr1:100895622-100896488	ENSG00000162694_EXTL2,-443;ENSG00000162695_SLC30A7,0;ENSG00000273204_AC104506.1,694	ENSG00000162695_SLC30A7,0			0.00268856	0.196448	Diagnosis	Immature
chr1:101025464-101026379	ENSG00000233184_AC093157.1,0;ENSG00000117543_DPH5,0	ENSG00000117543_DPH5,0;ENSG00000233184_AC093157.1,0			0.00614632	0.23142	Diagnosis	Immature
chr1:108746314-108747118	ENSG00000116266_STXBP3,0	ENSG00000116266_STXBP3,0			0.000582528	0.171004	Diagnosis	Immature
chr1:109240323-109241230					0.00607651	0.230966	Diagnosis	Immature
chr1:109304270-109305168	ENSG00000221986_MYBPHL,1843	ENSG00000221986_MYBPHL,1843			0.00656314	0.235673	Diagnosis	Immature
chr1:109493634-109494558	ENSG00000174151_CYB561D1,0	ENSG00000174151_CYB561D1,0			0.00506983	0.221596	Diagnosis	Immature
chr1:109548159-109549047	ENSG00000065135_GNAI3,0	ENSG00000065135_GNAI3,0;ENSG00000156097_GPR61,8287			0.000923681	0.176098	Diagnosis	Immature
chr1:109984259-109985165	ENSG00000168710_AHCYL1,0	ENSG00000168710_AHCYL1,0			0.000209654	0.171004	Diagnosis	Immature
chr1:110407222-110408163	ENSG00000134248_LAMTOR5,0	ENSG00000134248_LAMTOR5,0;ENSG00000224699_LAMTOR5-AS1,60106			0.00753525	0.240176	Diagnosis	Immature
chr1:110565264-110566182		ENSG00000177301_KCNA2,65292			0.00119679	0.177939	Diagnosis	Immature
chr1:111739083-111739908	ENSG00000227811_INKA2-AS1,0	ENSG00000227811_INKA2-AS1,0;ENSG00000197852_INKA2,15916			0.00565705	0.225962	Diagnosis	Immature
chr1:113152876-113153766					0.00536973	0.223927	Diagnosis	Immature
chr1:113389874-113390782	ENSG00000081026_MAGI3,0	ENSG00000081026_MAGI3,0			0.00322639	0.202248	Diagnosis	Immature
chr1:113811922-113812790	ENSG00000231128_AL137856.1,0;ENSG00000081019_RSBN1,0	ENSG00000081019_RSBN1,0;ENSG00000231128_AL137856.1,0			0.000322372	0.171004	Diagnosis	Immature
chr1:113904652-113905564	ENSG00000134262_AP4B1,0;ENSG00000118655_DCLRE1B,0	ENSG00000134262_AP4B1,0;ENSG00000118655_DCLRE1B,0			0.00286088	0.196988	Diagnosis	Immature
chr1:114757451-114758257	ENSG00000009307_CSDE1,419	ENSG00000009307_CSDE1,419			0.00167835	0.184273	Diagnosis	Immature
chr1:115337596-115338522	ENSG00000134259_NGF,0	ENSG00000134259_NGF,0;ENSG00000228035_NGF-AS1,54562			0.00899418	0.24992	Diagnosis	Immature
chr1:116033050-116033944		ENSG00000163393_SLC22A15,56537			0.0087192	0.247083	Diagnosis	Immature
chr1:116433096-116433993	ENSG00000230381_AL136376.1,0	ENSG00000230381_AL136376.1,0;ENSG00000233154_LINC01762,44849			0.00305936	0.2	Diagnosis	Immature
chr1:121184311-121185204	ENSG00000171943_SRGAP2C,0;ENSG00000188610_FAM72B,335	ENSG00000171943_SRGAP2C,0;ENSG00000188610_FAM72B,335			0.00159016	0.182746	Diagnosis	Immature
chr1:144551673-144552508					0.00202847	0.187585	Diagnosis	Immature
chr1:145607568-145608458	ENSG00000117262_GPR89A,0	ENSG00000117262_GPR89A,0			0.00277301	0.196728	Diagnosis	Immature
chr1:145957542-145958405	ENSG00000271601_LIX1L,0	ENSG00000271601_LIX1L,0;ENSG00000234222_LIX1L-AS1,30952			0.000438475	0.171004	Diagnosis	Immature
chr1:145964150-145965048	ENSG00000272031_ANKRD34A,0;ENSG00000121851_POLR3GL,0	ENSG00000272031_ANKRD34A,0;ENSG00000121851_POLR3GL,0;ENSG00000278431_AC243547.2,2762			0.00191415	0.185186	Diagnosis	Immature
chr1:146037618-146038400	ENSG00000168509_HJV,-872				0.00295033	0.198734	Diagnosis	Immature
chr1:146038937-146039791					0.00790807	0.242725	Diagnosis	Immature
chr1:146376320-146377220					0.0043905	0.21331	Diagnosis	Immature
chr1:147172096-147172987	ENSG00000131791_PRKAB2,0;ENSG00000237188_AC242426.2,0	ENSG00000131791_PRKAB2,0;ENSG00000237188_AC242426.2,0			0.00845167	0.244527	Diagnosis	Immature
chr1:147599466-147600379		ENSG00000116128_BCL9,57965			0.00385594	0.210077	Diagnosis	Immature
chr1:149886349-149887225	ENSG00000178096_BOLA1,-665;ENSG00000184678_HIST2H2BE,0;ENSG00000184260_HIST2H2AC,0;ENSG00000184270_HIST2H2AB,788	ENSG00000184678_HIST2H2BE,0;ENSG00000184260_HIST2H2AC,0			0.00689691	0.237674	Diagnosis	Immature
chr1:150363623-150364437	ENSG00000163125_RPRD2,532	ENSG00000163125_RPRD2,532			0.00112516	0.17692	Diagnosis	Immature
chr1:150486929-150487820	ENSG00000143374_TARS2,0	ENSG00000143374_TARS2,0			0.00802945	0.243514	Diagnosis	Immature
chr1:150515235-150516139	ENSG00000228126_FALEC,0	ENSG00000228126_FALEC,0			0.00104389	0.176647	Diagnosis	Immature
chr1:150629007-150629913	ENSG00000143420_ENSA,0	ENSG00000143420_ENSA,0			0.00241064	0.193625	Diagnosis	Immature
chr1:151006390-151007232	ENSG00000143363_PRUNE1,-1188;ENSG00000143409_MINDY1,1143	ENSG00000143409_MINDY1,1143			0.00362368	0.208274	Diagnosis	Immature
chr1:151008015-151008873	ENSG00000143409_MINDY1,0;ENSG00000143363_PRUNE1,0	ENSG00000143409_MINDY1,0;ENSG00000143363_PRUNE1,0			0.00426666	0.212613	Diagnosis	Immature
chr1:151070757-151071431	ENSG00000197622_CDC42SE1,-432;ENSG00000143458_GABPB2,179	ENSG00000143458_GABPB2,179			0.00737851	0.240085	Diagnosis	Immature
chr1:151281715-151282524	ENSG00000232671_ZNF687-AS1,0;ENSG00000143373_ZNF687,97	ENSG00000232671_ZNF687-AS1,0;ENSG00000143373_ZNF687,97			5.56823e-05	0.171004	Diagnosis	Immature
chr1:151399066-151399953	ENSG00000159377_PSMB4,0	ENSG00000159377_PSMB4,0			0.00761036	0.240176	Diagnosis	Immature
chr1:151458434-151459092	ENSG00000143442_POGZ,402	ENSG00000143442_POGZ,402			0.00426348	0.212613	Diagnosis	Immature
chr1:151762994-151763917	ENSG00000232937_AL589765.2,-1792;ENSG00000143436_MRPL9,0;ENSG00000143450_OAZ3,95	ENSG00000143436_MRPL9,0;ENSG00000143450_OAZ3,95;ENSG00000249602_AL589765.4,5584			0.00706099	0.238159	Diagnosis	Immature
chr1:151790131-151791029	ENSG00000203288_TDRKH-AS1,0;ENSG00000182134_TDRKH,387	ENSG00000203288_TDRKH-AS1,0;ENSG00000182134_TDRKH,387			0.00283355	0.196728	Diagnosis	Immature
chr1:153572279-153573174					0.00761523	0.240176	Diagnosis	Immature
chr1:153633580-153634445	ENSG00000160679_CHTOP,0;ENSG00000272030_AL162258.2,0	ENSG00000272030_AL162258.2,0;ENSG00000160679_CHTOP,0			0.00452381	0.215544	Diagnosis	Immature
chr1:153727454-153728360	ENSG00000143624_INTS3,0	ENSG00000143624_INTS3,0			0.00630665	0.232937	Diagnosis	Immature
chr1:153958195-153959050	ENSG00000160741_CRTC2,0	ENSG00000160741_CRTC2,0			0.00528394	0.223054	Diagnosis	Immature
chr1:153990276-153991203	ENSG00000177954_RPS27,0	ENSG00000177954_RPS27,0			0.00361771	0.208274	Diagnosis	Immature
chr1:154304586-154305513					0.00414107	0.212281	Diagnosis	Immature
chr1:154328257-154329139		ENSG00000143515_ATP8B2,2704			0.00420566	0.212499	Diagnosis	Immature
chr1:154558439-154559332	ENSG00000160714_UBE2Q1,0	ENSG00000160714_UBE2Q1,0			0.00520115	0.222792	Diagnosis	Immature
chr1:154961372-154962316	ENSG00000271380_AL451085.2,0;ENSG00000163348_PYGO2,1537	ENSG00000271380_AL451085.2,0;ENSG00000163348_PYGO2,1537;ENSG00000160691_SHC1,12079			0.00716937	0.23926	Diagnosis	Immature
chr1:155125873-155126781	ENSG00000169242_EFNA1,-1095				0.00775695	0.241367	Diagnosis	Immature
chr1:155127220-155128075	ENSG00000169242_EFNA1,0	ENSG00000169242_EFNA1,0			0.00329672	0.203762	Diagnosis	Immature
chr1:155172762-155173704	ENSG00000163462_TRIM46,-83;ENSG00000163463_KRTCAP2,0	ENSG00000163463_KRTCAP2,0			0.00247287	0.193871	Diagnosis	Immature
chr1:155227183-155228099					0.00673538	0.236952	Diagnosis	Immature
chr1:155244305-155245218	ENSG00000177628_GBA,0	ENSG00000177628_GBA,0			0.00764269	0.240325	Diagnosis	Immature
chr1:155562514-155563395	ENSG00000116539_ASH1L,0;ENSG00000235919_ASH1L-AS1,472	ENSG00000116539_ASH1L,0;ENSG00000235919_ASH1L-AS1,472			0.00446987	0.21447	Diagnosis	Immature
chr1:155688393-155689265	ENSG00000163374_YY1AP1,0;ENSG00000132676_DAP3,433	ENSG00000163374_YY1AP1,0;ENSG00000132676_DAP3,433			0.00385157	0.210077	Diagnosis	Immature
chr1:155745176-155746064					0.00254206	0.195097	Diagnosis	Immature
chr1:155856798-155857717	ENSG00000132718_SYT11,-1850;ENSG00000116580_GON4L,1683	ENSG00000116580_GON4L,1683			0.00832364	0.244261	Diagnosis	Immature
chr1:155859015-155859876	ENSG00000116580_GON4L,0;ENSG00000132718_SYT11,0	ENSG00000116580_GON4L,0;ENSG00000132718_SYT11,0			0.00559311	0.224869	Diagnosis	Immature
chr1:156193508-156194434	ENSG00000160785_SLC25A44,0	ENSG00000160785_SLC25A44,0			0.00809085	0.243514	Diagnosis	Immature
chr1:156212653-156213538	ENSG00000160783_PMF1,0	ENSG00000160783_PMF1,0;ENSG00000160785_SLC25A44,18721			0.00559143	0.224869	Diagnosis	Immature
chr1:156282359-156283281	ENSG00000198952_SMG5,0;ENSG00000163472_TMEM79,0	ENSG00000198952_SMG5,0;ENSG00000163472_TMEM79,0			0.00112949	0.17692	Diagnosis	Immature
chr1:156388177-156389030	ENSG00000237390_AL139130.1,0	ENSG00000237390_AL139130.1,0			0.000401845	0.171004	Diagnosis	Immature
chr1:156413318-156414119		ENSG00000125462_C1orf61,42644			0.00131659	0.181017	Diagnosis	Immature
chr1:156457062-156457625	ENSG00000125462_C1orf61,-299				0.00900919	0.249934	Diagnosis	Immature
chr1:156500541-156501410	ENSG00000116604_MEF2D,0	ENSG00000116604_MEF2D,0			0.00183505	0.184273	Diagnosis	Immature
chr1:156504857-156505691					0.00254637	0.195097	Diagnosis	Immature
chr1:156591325-156592230	ENSG00000163382_NAXE,0	ENSG00000163382_NAXE,0			0.00707706	0.238347	Diagnosis	Immature
chr1:156766936-156767845	ENSG00000143321_HDGF,-11;ENSG00000287624_AL590666.5,1388	ENSG00000143294_PRCC,16326			0.00748322	0.240176	Diagnosis	Immature
chr1:157045439-157046357	ENSG00000132694_ARHGEF11,-69				0.00347165	0.20564	Diagnosis	Immature
chr1:159363054-159363936		ENSG00000228560_AL513323.1,105132			0.000377118	0.171004	Diagnosis	Immature
chr1:159989417-159990285					0.00338545	0.205115	Diagnosis	Immature
chr1:160046287-160047188		ENSG00000177807_KCNJ10,22972			0.0056361	0.225411	Diagnosis	Immature
chr1:160100792-160101688	ENSG00000162729_IGSF8,-1849				0.0049896	0.221118	Diagnosis	Immature
chr1:160284706-160285605	ENSG00000162735_PEX19,743	ENSG00000162735_PEX19,743			0.00788838	0.242596	Diagnosis	Immature
chr1:161382035-161382852					0.00712448	0.238725	Diagnosis	Immature
chr1:161389708-161390627					0.00161884	0.182905	Diagnosis	Immature
chr1:161523709-161524622	ENSG00000173110_HSPA6,0	ENSG00000173110_HSPA6,0;ENSG00000143226_FCGR2A,18279			0.00476141	0.219335	Diagnosis	Immature
chr1:161530592-161531357					0.00282817	0.196728	Diagnosis	Immature
chr1:161621201-161622123					0.00705643	0.238159	Diagnosis	Immature
chr1:161749453-161750285	ENSG00000081721_DUSP12,0	ENSG00000081721_DUSP12,0			0.0046486	0.217535	Diagnosis	Immature
chr1:163321412-163322339	ENSG00000143248_RGS5,0;ENSG00000232995_AL592435.1,0	ENSG00000143248_RGS5,0;ENSG00000232995_AL592435.1,0;ENSG00000143228_NUF2,54836			0.00477332	0.219422	Diagnosis	Immature
chr1:165537508-165538406		ENSG00000237463_LRRC52-AS1,43749			0.00221966	0.191381	Diagnosis	Immature
chr1:165768507-165769410	ENSG00000224358_TMCO1-AS1,0	ENSG00000224358_TMCO1-AS1,0;ENSG00000143183_TMCO1,58345			0.00773228	0.241215	Diagnosis	Immature
chr1:167220238-167221103	ENSG00000272205_AL451050.2,0;ENSG00000143190_POU2F1,0	ENSG00000272205_AL451050.2,0;ENSG00000143190_POU2F1,0			0.00519118	0.222689	Diagnosis	Immature
chr1:167553283-167554168	ENSG00000143162_CREG1,0	ENSG00000143162_CREG1,0			0.00795112	0.243409	Diagnosis	Immature
chr1:167883213-167884085		ENSG00000143199_ADCY10,30130			0.00586349	0.229278	Diagnosis	Immature
chr1:169367471-169368344	ENSG00000143156_NME7,0;ENSG00000117475_BLZF1,0	ENSG00000143156_NME7,0;ENSG00000117475_BLZF1,0			0.00224092	0.19219	Diagnosis	Immature
chr1:169485537-169486416	ENSG00000117479_SLC19A2,0;ENSG00000213062_Z99572.1,0	ENSG00000117479_SLC19A2,0;ENSG00000213062_Z99572.1,0			0.000207106	0.171004	Diagnosis	Immature
chr1:169794458-169795374	ENSG00000171806_METTL18,0	ENSG00000171806_METTL18,0;ENSG00000000460_C1orf112,132451			0.00288924	0.197162	Diagnosis	Immature
chr1:169893513-169894506	ENSG00000000457_SCYL3,0	ENSG00000000457_SCYL3,0			0.000724751	0.171004	Diagnosis	Immature
chr1:170074198-170075104		ENSG00000075945_KIFAP3,10104			0.00264047	0.1959	Diagnosis	Immature
chr1:170664397-170665181	ENSG00000116132_PRRX1,1669	ENSG00000116132_PRRX1,1669			0.00680747	0.237417	Diagnosis	Immature
chr1:171485102-171485961	ENSG00000117523_PRRC2C,0	ENSG00000117523_PRRC2C,0			0.00197712	0.186248	Diagnosis	Immature
chr1:171781005-171781925	ENSG00000010165_EEF1AKNMT,0	ENSG00000010165_EEF1AKNMT,0			0.000171364	0.171004	Diagnosis	Immature
chr1:172532511-172533379	ENSG00000094975_SUCO,162	ENSG00000094975_SUCO,162			0.00719054	0.239479	Diagnosis	Immature
chr1:174999356-175000239	ENSG00000287697_Z99127.4,0;ENSG00000116161_CACYBP,193	ENSG00000287697_Z99127.4,0;ENSG00000116161_CACYBP,193			0.00112602	0.17692	Diagnosis	Immature
chr1:177088949-177089805		ENSG00000152092_ASTN1,75168			0.000701414	0.171004	Diagnosis	Immature
chr1:177830250-177831172		ENSG00000227579_AL136114.1,88980			0.00117498	0.177939	Diagnosis	Immature
chr1:179882020-179882939	ENSG00000143337_TOR1AIP1,0;ENSG00000272906_AL353708.3,0	ENSG00000272906_AL353708.3,0;ENSG00000143337_TOR1AIP1,0			0.00288776	0.197162	Diagnosis	Immature
chr1:179954334-179955215	ENSG00000260360_AL353708.1,0;ENSG00000135837_CEP350,0	ENSG00000260360_AL353708.1,0;ENSG00000135837_CEP350,0			0.000287944	0.171004	Diagnosis	Immature
chr1:180154310-180155230	ENSG00000116260_QSOX1,0	ENSG00000116260_QSOX1,0			0.00373806	0.209409	Diagnosis	Immature
chr1:180982213-180983034		ENSG00000135823_STX6,40087			0.000534999	0.171004	Diagnosis	Immature
chr1:181550938-181551856		ENSG00000198216_CACNA1E,233248			0.00668882	0.236588	Diagnosis	Immature
chr1:181929264-181929868		ENSG00000287452_AL161734.2,69117			0.00658884	0.235673	Diagnosis	Immature
chr1:182263866-182264713		ENSG00000228918_LINC01344,49348			0.00539573	0.22417	Diagnosis	Immature
chr1:182588666-182589573	ENSG00000135828_RNASEL,0	ENSG00000135828_RNASEL,0			0.00540178	0.22417	Diagnosis	Immature
chr1:183471880-183472603	ENSG00000116698_SMG7,0;ENSG00000232860_SMG7-AS1,0	ENSG00000232860_SMG7-AS1,0;ENSG00000116698_SMG7,0			0.00037658	0.171004	Diagnosis	Immature
chr1:183991525-183992404		ENSG00000198756_COLGALT2,45325			0.00845812	0.244527	Diagnosis	Immature
chr1:184036698-184037595	ENSG00000198756_COLGALT2,134	ENSG00000198756_COLGALT2,134			0.00578996	0.228115	Diagnosis	Immature
chr1:184386449-184387356	ENSG00000271387_AL445228.2,0;ENSG00000116667_C1orf21,0	ENSG00000271387_AL445228.2,0;ENSG00000116667_C1orf21,0			0.00451039	0.215387	Diagnosis	Immature
chr1:185156731-185157612	ENSG00000121486_TRMT1L,0;ENSG00000116668_SWT1,0	ENSG00000121486_TRMT1L,0;ENSG00000116668_SWT1,0			0.00614681	0.23142	Diagnosis	Immature
chr1:185316976-185317842	ENSG00000116679_IVNS1ABP,0;ENSG00000273004_AL078644.2,0	ENSG00000116679_IVNS1ABP,0;ENSG00000273004_AL078644.2,0			0.000531728	0.171004	Diagnosis	Immature
chr1:186375040-186375986	ENSG00000047410_TPR,0;ENSG00000157181_ODR4,0	ENSG00000047410_TPR,0;ENSG00000157181_ODR4,0			0.00696714	0.237872	Diagnosis	Immature
chr1:192808468-192809388	ENSG00000116741_RGS2,0	ENSG00000116741_RGS2,0;ENSG00000285280_AL390957.1,148325			0.0084151	0.244479	Diagnosis	Immature
chr1:193104964-193105817	ENSG00000023572_GLRX2,297	ENSG00000023572_GLRX2,297			0.00112979	0.17692	Diagnosis	Immature
chr1:193121552-193122442	ENSG00000134371_CDC73,0	ENSG00000134371_CDC73,0			0.000396785	0.171004	Diagnosis	Immature
chr1:197200919-197201818	ENSG00000177888_ZBTB41,-377				0.00382048	0.20995	Diagnosis	Immature
chr1:197902345-197903276	ENSG00000203724_C1orf53,0	ENSG00000203724_C1orf53,0			0.000221052	0.171004	Diagnosis	Immature
chr1:200669362-200670314	ENSG00000260088_DDX59-AS1,0;ENSG00000118197_DDX59,0	ENSG00000118197_DDX59,0;ENSG00000260088_DDX59-AS1,0			0.00367584	0.209039	Diagnosis	Immature
chr1:201113953-201114834	ENSG00000081248_CACNA1S,-1502	ENSG00000232237_ASCL5,12350			0.00175289	0.184273	Diagnosis	Immature
chr1:201468776-201469684	ENSG00000174307_PHLDA3,0	ENSG00000174307_PHLDA3,0			0.00181338	0.184273	Diagnosis	Immature
chr1:201648142-201648971		ENSG00000134369_NAV1,25257			0.00502921	0.22118	Diagnosis	Immature
chr1:201954974-201955889	ENSG00000134375_TIMM17A,0	ENSG00000134375_TIMM17A,0			0.00195294	0.186248	Diagnosis	Immature
chr1:202085201-202086014					0.00324118	0.202248	Diagnosis	Immature
chr1:202130229-202130982		ENSG00000170075_GPR37L1,7312			0.0019335	0.18609	Diagnosis	Immature
chr1:202810452-202811337	ENSG00000117139_KDM5B,-982;ENSG00000260021_AC098934.4,0;ENSG00000228288_PCAT6,0	ENSG00000260021_AC098934.4,0;ENSG00000228288_PCAT6,0			0.00619604	0.232296	Diagnosis	Immature
chr1:202957892-202958768	ENSG00000159346_ADIPOR1,0	ENSG00000159346_ADIPOR1,0			0.00812471	0.243514	Diagnosis	Immature
chr1:203327107-203327959					0.00442553	0.213703	Diagnosis	Immature
chr1:204198356-204199244	ENSG00000170498_KISS1,-1865	ENSG00000174567_GOLT1A,14744			0.00871355	0.247067	Diagnosis	Immature
chr1:204359525-204360394		ENSG00000143850_PLEKHA6,17271			0.0041561	0.212281	Diagnosis	Immature
chr1:204466251-204467125		ENSG00000133056_PIK3C2B,27599			0.00785013	0.24232	Diagnosis	Immature
chr1:205042757-205043614	ENSG00000184144_CNTN2,0	ENSG00000184144_CNTN2,0			0.00303715	0.199762	Diagnosis	Immature
chr1:205183351-205184261		ENSG00000133059_DSTYK,27441			0.0083266	0.244261	Diagnosis	Immature
chr1:205375894-205376817		ENSG00000226235_LEMD1-AS1,2642			0.00517306	0.222101	Diagnosis	Immature
chr1:205504136-205505010	ENSG00000117266_CDK18,0	ENSG00000117266_CDK18,0			0.0074499	0.240176	Diagnosis	Immature
chr1:205518689-205519551		ENSG00000117266_CDK18,14094			0.00123065	0.179147	Diagnosis	Immature
chr1:205631555-205632400	ENSG00000158711_ELK4,0	ENSG00000158711_ELK4,0			0.000289282	0.171004	Diagnosis	Immature
chr1:205749190-205749941	ENSG00000069275_NUCKS1,241	ENSG00000069275_NUCKS1,241			0.00373987	0.209409	Diagnosis	Immature
chr1:205812791-205813691	ENSG00000286619_AC119673.2,0;ENSG00000133065_SLC41A1,57	ENSG00000286619_AC119673.2,0;ENSG00000133065_SLC41A1,57			0.00487818	0.220175	Diagnosis	Immature
chr1:205994035-205994912		ENSG00000276600_RAB7B,8549			0.00121954	0.179147	Diagnosis	Immature
chr1:206556860-206557749		ENSG00000266094_RASSF5,49329			0.00500923	0.221118	Diagnosis	Immature
chr1:206612058-206612976	ENSG00000143486_EIF2D,0	ENSG00000143486_EIF2D,0			0.00229447	0.193625	Diagnosis	Immature
chr1:207822378-207823257		ENSG00000203709_MIR29B2CHG,55858			0.000971897	0.176326	Diagnosis	Immature
chr1:207823622-207824541		ENSG00000203709_MIR29B2CHG,54574			0.00248571	0.193871	Diagnosis	Immature
chr1:207963209-207964046		ENSG00000284237_LINC02767,3917			0.00315005	0.200905	Diagnosis	Immature
chr1:208105507-208106388	ENSG00000287220_AL590138.1,0	ENSG00000287220_AL590138.1,0;ENSG00000076356_PLXNA2,137996			0.00724814	0.239479	Diagnosis	Immature
chr1:208243957-208244772	ENSG00000076356_PLXNA2,0	ENSG00000076356_PLXNA2,0			0.00627774	0.232881	Diagnosis	Immature
chr1:211133763-211134604	ENSG00000234233_KCNH1-IT1,-389;ENSG00000143473_KCNH1,0	ENSG00000143473_KCNH1,0;ENSG00000284376_AC092017.4,72534			0.00851507	0.244984	Diagnosis	Immature
chr1:211258757-211259682	ENSG00000117625_RCOR3,380	ENSG00000117625_RCOR3,380			0.0052199	0.222892	Diagnosis	Immature
chr1:211578859-211579778	ENSG00000170385_SLC30A1,0	ENSG00000170385_SLC30A1,0			0.000798321	0.174388	Diagnosis	Immature
chr1:212415449-212416235	ENSG00000065600_PACC1,-548				0.00662679	0.235689	Diagnosis	Immature
chr1:212432527-212433393	ENSG00000287445_AC092803.3,0;ENSG00000117691_NENF,0	ENSG00000287445_AC092803.3,0;ENSG00000117691_NENF,0			0.00226545	0.193249	Diagnosis	Immature
chr1:212857819-212858695	ENSG00000198468_FLVCR1-DT,0;ENSG00000162769_FLVCR1,0	ENSG00000198468_FLVCR1-DT,0;ENSG00000162769_FLVCR1,0			0.00135114	0.181375	Diagnosis	Immature
chr1:222465076-222465957					0.00161485	0.182886	Diagnosis	Immature
chr1:222589510-222590417	ENSG00000225265_TAF1A-AS1,0;ENSG00000143498_TAF1A,0	ENSG00000143498_TAF1A,0;ENSG00000225265_TAF1A-AS1,0			0.0086947	0.24693	Diagnosis	Immature
chr1:222712281-222713026	ENSG00000162819_BROX,0;ENSG00000186063_AIDA,184	ENSG00000162819_BROX,0;ENSG00000186063_AIDA,184			0.00096306	0.176326	Diagnosis	Immature
chr1:223992228-223993107	ENSG00000278467_AC138393.3,-1155				0.00109703	0.17692	Diagnosis	Immature
chr1:224329820-224330732	ENSG00000143748_NVL,0	ENSG00000143748_NVL,0			0.00220601	0.191381	Diagnosis	Immature
chr1:225427695-225428600	ENSG00000143815_LBR,325	ENSG00000143815_LBR,325			0.00662087	0.235689	Diagnosis	Immature
chr1:225652842-225653693	ENSG00000154380_ENAH,0	ENSG00000154380_ENAH,0			0.00223825	0.19219	Diagnosis	Immature
chr1:225999034-225999953	ENSG00000143751_SDE2,0	ENSG00000143751_SDE2,0			0.00710184	0.238659	Diagnosis	Immature
chr1:226308806-226309691	ENSG00000183814_LIN9,178	ENSG00000183814_LIN9,178			0.00702986	0.238109	Diagnosis	Immature
chr1:226407619-226408513	ENSG00000143799_PARP1,0	ENSG00000143799_PARP1,0			0.00344248	0.205167	Diagnosis	Immature
chr1:226529618-226530381					0.00625861	0.23271	Diagnosis	Immature
chr1:226939675-226940538		ENSG00000163050_COQ8A,42139			0.00145054	0.182371	Diagnosis	Immature
chr1:227318012-227318952	ENSG00000143776_CDC42BPA,0	ENSG00000143776_CDC42BPA,0			0.00802076	0.243514	Diagnosis	Immature
chr1:228486859-228487616	ENSG00000168159_RNF187,0	ENSG00000168159_RNF187,0			0.0013311	0.181124	Diagnosis	Immature
chr1:228836166-228837037					0.00558344	0.224869	Diagnosis	Immature
chr1:228837782-228838578					0.00451431	0.215387	Diagnosis	Immature
chr1:229578921-229579792					0.000627371	0.171004	Diagnosis	Immature
chr1:229625632-229626512	ENSG00000135801_TAF5L,0;ENSG00000135763_URB2,0	ENSG00000135801_TAF5L,0;ENSG00000135763_URB2,0			0.000803711	0.174388	Diagnosis	Immature
chr1:230066650-230067567		ENSG00000143641_GALNT2,8660			0.00490616	0.220175	Diagnosis	Immature
chr1:230515370-230516249					0.00663723	0.235689	Diagnosis	Immature
chr1:231240796-231241717	ENSG00000143633_C1orf131,0;ENSG00000116906_GNPAT,0	ENSG00000143633_C1orf131,0;ENSG00000116906_GNPAT,0			0.00654759	0.235673	Diagnosis	Immature
chr1:231421916-231422780	ENSG00000135766_EGLN1,0	ENSG00000135766_EGLN1,0			0.00102022	0.176647	Diagnosis	Immature
chr1:234373087-234374030	ENSG00000168275_COA6,0;ENSG00000231663_COA6-AS1,0;ENSG00000273367_AL355472.3,901	ENSG00000231663_COA6-AS1,0;ENSG00000168275_COA6,0			0.00178563	0.184273	Diagnosis	Immature
chr1:234478438-234479242	ENSG00000059588_TARBP1,0	ENSG00000059588_TARBP1,0			0.00149941	0.182371	Diagnosis	Immature
chr1:235328037-235328893	ENSG00000054267_ARID4B,0;ENSG00000285053_TBCE,0;ENSG00000152904_GGPS1,687	ENSG00000054267_ARID4B,0;ENSG00000285053_TBCE,0;ENSG00000152904_GGPS1,687			0.00233737	0.193625	Diagnosis	Immature
chr1:236156263-236157126		ENSG00000077585_GPR137B,13758			0.00603658	0.230409	Diagnosis	Immature
chr1:236604191-236605086	ENSG00000119285_HEATR1,0	ENSG00000119285_HEATR1,0			0.00526202	0.223054	Diagnosis	Immature
chr1:239386244-239387110	ENSG00000133019_CHRM3,0	ENSG00000133019_CHRM3,0			0.000794262	0.174388	Diagnosis	Immature
chr1:241423741-241424578		ENSG00000287516_AL359764.2,10025			0.00403177	0.211609	Diagnosis	Immature
chr1:241639953-241640835	ENSG00000203668_CHML,0;ENSG00000287513_AL133390.1,0	ENSG00000203668_CHML,0;ENSG00000287513_AL133390.1,0;ENSG00000054277_OPN3,36541			0.000145874	0.171004	Diagnosis	Immature
chr1:241847589-241848508	ENSG00000174371_EXO1,0	ENSG00000174371_EXO1,0			0.00418069	0.212385	Diagnosis	Immature
chr1:243255519-243256309	ENSG00000143702_CEP170,-171;ENSG00000054282_SDCCAG8,0	ENSG00000054282_SDCCAG8,0			0.00681947	0.237478	Diagnosis	Immature
chr1:244451612-244452505	ENSG00000179397_CATSPERE,-1872;ENSG00000035687_ADSS,0	ENSG00000035687_ADSS,0			0.00402874	0.211609	Diagnosis	Immature
chr1:244652542-244653454	ENSG00000121644_DESI2,0	ENSG00000121644_DESI2,0			5.7774e-05	0.171004	Diagnosis	Immature
chr1:244834894-244835819	ENSG00000287601_BX323046.2,0;ENSG00000203667_COX20,0	ENSG00000287601_BX323046.2,0;ENSG00000203667_COX20,0			0.000123968	0.171004	Diagnosis	Immature
chr1:244864197-244865039	ENSG00000153187_HNRNPU,0;ENSG00000273175_BX323046.1,0	ENSG00000153187_HNRNPU,0;ENSG00000273175_BX323046.1,0			0.00197712	0.186248	Diagnosis	Immature
chr1:248825731-248826563	ENSG00000175137_SH3BP5L,0	ENSG00000175137_SH3BP5L,0			0.00192066	0.185492	Diagnosis	Immature
chr1:248873475-248874343					0.000616635	0.171004	Diagnosis	Immature
chr10:135111-135949	ENSG00000015171_ZMYND11,646	ENSG00000015171_ZMYND11,646			0.001595	0.182746	Diagnosis	Immature
chr10:1048703-1049587	ENSG00000067064_IDI1,0;ENSG00000047056_WDR37,0	ENSG00000067064_IDI1,0;ENSG00000047056_WDR37,0			0.00105174	0.176647	Diagnosis	Immature
chr10:1180542-1181413		ENSG00000229205_LINC00200,20774;ENSG00000185736_ADARB2,556112			0.00339065	0.205115	Diagnosis	Immature
chr10:1546171-1547084		ENSG00000205696_ADARB2-AS1,19534;ENSG00000185736_ADARB2,190441			0.000995947	0.176418	Diagnosis	Immature
chr10:3172461-3173393	ENSG00000107959_PITRM1,0	ENSG00000107959_PITRM1,0			0.00147416	0.182371	Diagnosis	Immature
chr10:3471951-3472853		ENSG00000233321_LINC02669,30062			0.00719066	0.239479	Diagnosis	Immature
chr10:3785006-3785896	ENSG00000067082_KLF6,0	ENSG00000067082_KLF6,0			0.00810009	0.243514	Diagnosis	Immature
chr10:4316054-4316945					0.00280828	0.196728	Diagnosis	Immature
chr10:6202498-6203309	ENSG00000213994_AL157395.1,0	ENSG00000213994_AL157395.1,0;ENSG00000170525_PFKFB3,57564			0.00687743	0.237552	Diagnosis	Immature
chr10:6987244-6988132		ENSG00000287277_AL392086.3,130337			0.00342415	0.205115	Diagnosis	Immature
chr10:6999368-7000159		ENSG00000287277_AL392086.3,118310			0.00882677	0.248249	Diagnosis	Immature
chr10:7410545-7411476	ENSG00000198879_SFMBT2,10	ENSG00000198879_SFMBT2,10			0.00401867	0.211609	Diagnosis	Immature
chr10:11164359-11165191		ENSG00000048740_CELF2,365962			0.00632661	0.233135	Diagnosis	Immature
chr10:12129136-12130037	ENSG00000065665_SEC61A2,0	ENSG00000065665_SEC61A2,0			0.00464241	0.217535	Diagnosis	Immature
chr10:13099630-13100505	ENSG00000151468_CCDC3,0;ENSG00000123240_OPTN,181	ENSG00000151468_CCDC3,0;ENSG00000123240_OPTN,181			0.000635444	0.171004	Diagnosis	Immature
chr10:13347544-13348354	ENSG00000086475_SEPHS1,0	ENSG00000086475_SEPHS1,0			0.00190739	0.185015	Diagnosis	Immature
chr10:14837698-14838621	ENSG00000284024_HSPA14,0;ENSG00000187522_HSPA14,0;ENSG00000185267_CDNF,0	ENSG00000185267_CDNF,0;ENSG00000284024_HSPA14,0;ENSG00000187522_HSPA14,0			0.00845042	0.244527	Diagnosis	Immature
chr10:16030510-16031328					0.0066545	0.235825	Diagnosis	Immature
chr10:18140116-18140955	ENSG00000165995_CACNB2,0	ENSG00000165995_CACNB2,0			0.0080382	0.243514	Diagnosis	Immature
chr10:18651231-18652156		ENSG00000241058_NSUN6,7129			0.00448113	0.2148	Diagnosis	Immature
chr10:19815637-19816478	ENSG00000120594_PLXDC2,0;ENSG00000285852_AL353147.1,0	ENSG00000285852_AL353147.1,0;ENSG00000120594_PLXDC2,0			0.0079109	0.242725	Diagnosis	Immature
chr10:21525731-21526586	ENSG00000180592_SKIDA1,0;ENSG00000286881_AL358780.1,0;ENSG00000078403_MLLT10,1085	ENSG00000180592_SKIDA1,0;ENSG00000286881_AL358780.1,0;ENSG00000078403_MLLT10,1085			0.00411607	0.212281	Diagnosis	Immature
chr10:22228896-22229806					0.00272245	0.196728	Diagnosis	Immature
chr10:22315945-22316856	ENSG00000148444_COMMD3,0	ENSG00000148444_COMMD3,0			0.00208495	0.1888	Diagnosis	Immature
chr10:22321476-22322364	ENSG00000168283_BMI1,377	ENSG00000168283_BMI1,377			0.00714532	0.239033	Diagnosis	Immature
chr10:22615606-22616529		ENSG00000150867_PIP4K2A,98049			0.000661463	0.171004	Diagnosis	Immature
chr10:24724300-24725174	ENSG00000107863_ARHGAP21,-413				0.00895556	0.24992	Diagnosis	Immature
chr10:27154894-27155752	ENSG00000136758_YME1L1,0;ENSG00000120539_MASTL,70	ENSG00000136758_YME1L1,0;ENSG00000120539_MASTL,70			0.00164411	0.183679	Diagnosis	Immature
chr10:27240277-27241130	ENSG00000262412_AL160291.1,-2000;ENSG00000107897_ACBD5,1000	ENSG00000107897_ACBD5,1000			0.0054918	0.224691	Diagnosis	Immature
chr10:28532370-28533288	ENSG00000095787_WAC,0;ENSG00000254635_WAC-AS1,0	ENSG00000254635_WAC-AS1,0;ENSG00000095787_WAC,0			0.000456588	0.171004	Diagnosis	Immature
chr10:28788442-28789286		ENSG00000235824_LINC00837,6827;ENSG00000232624_LINC01517,44936			0.00405323	0.211609	Diagnosis	Immature
chr10:29535062-29535996		ENSG00000197321_SVIL,200785			0.00529191	0.223195	Diagnosis	Immature
chr10:30092221-30093072		ENSG00000165757_JCAD,22422			0.00883495	0.248346	Diagnosis	Immature
chr10:30784909-30785804					0.00476335	0.219335	Diagnosis	Immature
chr10:31133621-31134415		ENSG00000287564_AL359546.1,100532			0.00689964	0.237674	Diagnosis	Immature
chr10:31759783-31760702					0.00015852	0.171004	Diagnosis	Immature
chr10:32345986-32346717	ENSG00000229327_AL391839.1,-680;ENSG00000233825_AL391839.2,0	ENSG00000233825_AL391839.2,0;ENSG00000120616_EPC1,32081			0.00182888	0.184273	Diagnosis	Immature
chr10:35089981-35090916	ENSG00000108094_CUL2,0	ENSG00000108094_CUL2,0			0.00124556	0.179658	Diagnosis	Immature
chr10:35336101-35336963	ENSG00000271335_AL117336.2,0	ENSG00000271335_AL117336.2,0;ENSG00000108100_CCNY,89076			0.00427879	0.212666	Diagnosis	Immature
chr10:37857356-37858272	ENSG00000236514_AL135791.1,0;ENSG00000198105_ZNF248,0	ENSG00000198105_ZNF248,0;ENSG00000236514_AL135791.1,0			0.00595314	0.230022	Diagnosis	Immature
chr10:38010439-38011311	ENSG00000189180_ZNF33A,0	ENSG00000189180_ZNF33A,0			0.00385585	0.210077	Diagnosis	Immature
chr10:38402441-38403324					0.00752622	0.240176	Diagnosis	Immature
chr10:43348290-43349181	ENSG00000285712_AC068707.1,1611	ENSG00000285712_AC068707.1,1611			0.00236861	0.193625	Diagnosis	Immature
chr10:43361978-43362918					0.00372949	0.209409	Diagnosis	Immature
chr10:43420252-43421109	ENSG00000230555_AL450326.1,0	ENSG00000230555_AL450326.1,0			0.00319024	0.201847	Diagnosis	Immature
chr10:43689815-43690716					0.0085486	0.245323	Diagnosis	Immature
chr10:44878564-44879359		ENSG00000224812_TMEM72-AS1,80350			0.00421857	0.212613	Diagnosis	Immature
chr10:44963915-44964827		ENSG00000107551_RASSF4,4508			0.00276487	0.196728	Diagnosis	Immature
chr10:45594394-45595267	ENSG00000165406_MARCH8,0	ENSG00000165406_MARCH8,0			0.00299805	0.199738	Diagnosis	Immature
chr10:47092542-47093470					0.00649691	0.235346	Diagnosis	Immature
chr10:47384027-47384920	ENSG00000265763_ZNF488,0	ENSG00000265763_ZNF488,0			0.0011213	0.17692	Diagnosis	Immature
chr10:49538669-49539560	ENSG00000225830_ERCC6,0	ENSG00000225830_ERCC6,0			0.00541651	0.22417	Diagnosis	Immature
chr10:50449117-50449967		ENSG00000198964_SGMS1,175196			0.00746102	0.240176	Diagnosis	Immature
chr10:50538753-50539623		ENSG00000198964_SGMS1,85540			0.00724153	0.239479	Diagnosis	Immature
chr10:50621835-50622677	ENSG00000226200_SGMS1-AS1,-789	ENSG00000198964_SGMS1,2486			0.00646131	0.234638	Diagnosis	Immature
chr10:50624433-50625275	ENSG00000198964_SGMS1,0;ENSG00000226200_SGMS1-AS1,967	ENSG00000198964_SGMS1,0;ENSG00000226200_SGMS1-AS1,967			0.000357294	0.171004	Diagnosis	Immature
chr10:58268816-58269599	ENSG00000151151_IPMK,-922;ENSG00000122873_CISD1,0	ENSG00000122873_CISD1,0			0.00299136	0.199738	Diagnosis	Immature
chr10:58384856-58385746	ENSG00000108064_TFAM,0	ENSG00000108064_TFAM,0			0.000586113	0.171004	Diagnosis	Immature
chr10:62373872-62374743	ENSG00000138311_ZNF365,0;ENSG00000288011_AC024597.1,423	ENSG00000138311_ZNF365,0;ENSG00000288011_AC024597.1,423			0.00263297	0.1959	Diagnosis	Immature
chr10:67665205-67666011		ENSG00000183230_CTNNA3,30184			0.00430539	0.212666	Diagnosis	Immature
chr10:67763933-67764805					0.000350779	0.171004	Diagnosis	Immature
chr10:67849145-67850004	ENSG00000272892_AL133551.1,0	ENSG00000272892_AL133551.1,0			0.00802694	0.243514	Diagnosis	Immature
chr10:68900717-68901656	ENSG00000107625_DDX50,0	ENSG00000107625_DDX50,0;ENSG00000285871_AL359844.1,3797			0.00833483	0.244261	Diagnosis	Immature
chr10:69123614-69124537	ENSG00000122958_VPS26A,102	ENSG00000122958_VPS26A,102			0.00418075	0.212385	Diagnosis	Immature
chr10:70382249-70383078	ENSG00000172731_LRRC20,0	ENSG00000172731_LRRC20,0			0.00072656	0.171004	Diagnosis	Immature
chr10:70672043-70672949	ENSG00000138316_ADAMTS14,0	ENSG00000138316_ADAMTS14,0			0.00628921	0.232935	Diagnosis	Immature
chr10:71377016-71377907		ENSG00000198246_SLC29A3,57757			0.00338541	0.205115	Diagnosis	Immature
chr10:71986571-71987483		ENSG00000122863_CHST3,22176			0.00836414	0.244285	Diagnosis	Immature
chr10:72044246-72045130					0.00115781	0.177858	Diagnosis	Immature
chr10:72088327-72089187	ENSG00000107742_SPOCK2,0	ENSG00000107742_SPOCK2,0			0.00735319	0.240034	Diagnosis	Immature
chr10:72272544-72273276	ENSG00000168209_DDIT4,-648				0.0024605	0.193871	Diagnosis	Immature
chr10:72424913-72425793		ENSG00000107745_MICU1,200398			0.00164554	0.183679	Diagnosis	Immature
chr10:73096500-73097366	ENSG00000122884_P4HA1,0	ENSG00000122884_P4HA1,0			0.000920935	0.176098	Diagnosis	Immature
chr10:73358260-73359143	ENSG00000156042_CFAP70,0	ENSG00000156042_CFAP70,0			0.00671757	0.236926	Diagnosis	Immature
chr10:73625510-73626342	ENSG00000166348_USP54,0;ENSG00000268584_AC073389.1,0	ENSG00000166348_USP54,0;ENSG00000268584_AC073389.1,0			0.00399359	0.211609	Diagnosis	Immature
chr10:73781580-73782494	ENSG00000172586_CHCHD1,0	ENSG00000172586_CHCHD1,0			0.00870424	0.24693	Diagnosis	Immature
chr10:74176206-74177129		ENSG00000156110_ADK,25004			0.00128052	0.180403	Diagnosis	Immature
chr10:75210112-75211029	ENSG00000165637_VDAC2,0	ENSG00000165637_VDAC2,0			0.000889539	0.174467	Diagnosis	Immature
chr10:75235592-75236458	ENSG00000165644_COMTD1,0	ENSG00000165644_COMTD1,0			0.00484624	0.220175	Diagnosis	Immature
chr10:75401738-75402488	ENSG00000270087_AC010997.3,-492;ENSG00000165655_ZNF503,0;ENSG00000237149_ZNF503-AS2,219	ENSG00000165655_ZNF503,0;ENSG00000237149_ZNF503-AS2,219			0.0010571	0.176815	Diagnosis	Immature
chr10:77172056-77172941		ENSG00000156113_KCNMA1,465428			0.00742752	0.240131	Diagnosis	Immature
chr10:77988798-77989718		ENSG00000148606_POLR3A,39797			0.00106799	0.17692	Diagnosis	Immature
chr10:78029103-78029984	ENSG00000148606_POLR3A,0	ENSG00000148606_POLR3A,0			0.00823327	0.243928	Diagnosis	Immature
chr10:78293265-78294153	ENSG00000229543_AC010163.1,0	ENSG00000229543_AC010163.1,0;ENSG00000230417_LINC00595,114080;ENSG00000282863_AC012560.1,114091			0.00792868	0.242855	Diagnosis	Immature
chr10:78302898-78303814		ENSG00000230417_LINC00595,123713;ENSG00000282863_AC012560.1,123724			0.0058208	0.2286	Diagnosis	Immature
chr10:79066810-79067639	ENSG00000108175_ZMIZ1,-1327;ENSG00000224596_ZMIZ1-AS1,256	ENSG00000224596_ZMIZ1-AS1,256			0.00804004	0.243514	Diagnosis	Immature
chr10:79243279-79243960		ENSG00000108175_ZMIZ1,174313			0.00400596	0.211609	Diagnosis	Immature
chr10:79274448-79275298		ENSG00000108175_ZMIZ1,205482			0.00620887	0.232296	Diagnosis	Immature
chr10:79335419-79336251					0.0016971	0.184273	Diagnosis	Immature
chr10:79347062-79347913	ENSG00000108179_PPIF,0	ENSG00000108179_PPIF,0			0.00324143	0.202248	Diagnosis	Immature
chr10:79442132-79443030		ENSG00000165424_ZCCHC24,2594			0.00741322	0.240111	Diagnosis	Immature
chr10:79445344-79446236	ENSG00000165424_ZCCHC24,0	ENSG00000165424_ZCCHC24,0			0.000316527	0.171004	Diagnosis	Immature
chr10:80205106-80205942	ENSG00000237523_LINC00857,-1430;ENSG00000122359_ANXA11,0	ENSG00000122359_ANXA11,0			0.00617113	0.231629	Diagnosis	Immature
chr10:84139042-84139941	ENSG00000165678_GHITM,0;ENSG00000271933_AL603756.1,641	ENSG00000165678_GHITM,0;ENSG00000271933_AL603756.1,641			0.00566585	0.226131	Diagnosis	Immature
chr10:84244441-84245361		ENSG00000148604_RGR,13775			0.00466159	0.217535	Diagnosis	Immature
chr10:84391075-84391954		ENSG00000107771_CCSER2,62489			0.00372584	0.209409	Diagnosis	Immature
chr10:86262683-86263550		ENSG00000182771_GRID1,103245			0.00163914	0.183679	Diagnosis	Immature
chr10:87817820-87818676		ENSG00000138138_ATAD1,22667			0.00583725	0.229001	Diagnosis	Immature
chr10:87863163-87863996	ENSG00000227268_KLLN,0;ENSG00000171862_PTEN,0	ENSG00000227268_KLLN,0;ENSG00000171862_PTEN,0			0.00622155	0.232369	Diagnosis	Immature
chr10:88582634-88583574	ENSG00000184719_RNLS,956	ENSG00000184719_RNLS,956			0.00487744	0.220175	Diagnosis	Immature
chr10:89643750-89644525	ENSG00000232936_AL157400.2,-747;ENSG00000152782_PANK1,1047	ENSG00000152782_PANK1,1047			0.00413728	0.212281	Diagnosis	Immature
chr10:92573706-92574613	ENSG00000119912_IDE,0	ENSG00000119912_IDE,0			0.0024367	0.193625	Diagnosis	Immature
chr10:92591299-92592168	ENSG00000138160_KIF11,-962				0.00695579	0.237705	Diagnosis	Immature
chr10:92848184-92849026		ENSG00000138190_EXOC6,21353			0.00376432	0.209409	Diagnosis	Immature
chr10:93702196-93703103	ENSG00000148690_FRA10AC1,0	ENSG00000148690_FRA10AC1,0			0.0043792	0.213227	Diagnosis	Immature
chr10:95656266-95657118	ENSG00000059573_ALDH18A1,0	ENSG00000059573_ALDH18A1,0			0.00407547	0.21197	Diagnosis	Immature
chr10:96374979-96375818		ENSG00000095587_TLL2,138108			0.00221684	0.191381	Diagnosis	Immature
chr10:96513448-96514369	ENSG00000095587_TLL2,0	ENSG00000095587_TLL2,0			0.00420568	0.212499	Diagnosis	Immature
chr10:96832154-96832941	ENSG00000196233_LCOR,0	ENSG00000196233_LCOR,0			0.000128397	0.171004	Diagnosis	Immature
chr10:96873529-96874347		ENSG00000196233_LCOR,41247			0.00440165	0.213478	Diagnosis	Immature
chr10:97292232-97293109	ENSG00000213390_ARHGAP19,0	ENSG00000213390_ARHGAP19,0			0.000712558	0.171004	Diagnosis	Immature
chr10:97318803-97319667	ENSG00000165879_FRAT1,0	ENSG00000165879_FRAT1,0			0.00726976	0.239479	Diagnosis	Immature
chr10:97325493-97326353					0.00496774	0.220812	Diagnosis	Immature
chr10:97498228-97499156	ENSG00000155229_MMS19,0;ENSG00000165886_UBTD1,0	ENSG00000155229_MMS19,0;ENSG00000165886_UBTD1,0			0.00242932	0.193625	Diagnosis	Immature
chr10:97640221-97641106	ENSG00000155252_PI4K2A,0	ENSG00000155252_PI4K2A,0			0.000222886	0.171004	Diagnosis	Immature
chr10:99620297-99621125	ENSG00000155287_SLC25A28,0;ENSG00000260475_AL353719.1,0	ENSG00000155287_SLC25A28,0;ENSG00000260475_AL353719.1,0			0.00194794	0.186248	Diagnosis	Immature
chr10:99658921-99659830	ENSG00000229278_AL133353.1,0;ENSG00000198018_ENTPD7,0	ENSG00000229278_AL133353.1,0;ENSG00000198018_ENTPD7,0			0.00400634	0.211609	Diagnosis	Immature
chr10:99731806-99732676	ENSG00000014919_COX15,0	ENSG00000014919_COX15,0;ENSG00000119929_CUTC,29248			0.00135673	0.181375	Diagnosis	Immature
chr10:100185621-100186506	ENSG00000107566_ERLIN1,0	ENSG00000107566_ERLIN1,0			0.00522033	0.222892	Diagnosis	Immature
chr10:100986945-100987823	ENSG00000236662_AL133215.1,-1331;ENSG00000107815_TWNK,0;ENSG00000055950_MRPL43,0	ENSG00000055950_MRPL43,0;ENSG00000107815_TWNK,0			0.00677725	0.237192	Diagnosis	Immature
chr10:100997824-100998529	ENSG00000107816_LZTS2,1206	ENSG00000107816_LZTS2,1206			0.00558313	0.224869	Diagnosis	Immature
chr10:101032174-101032962	ENSG00000186862_PDZD7,0;ENSG00000107819_SFXN3,940	ENSG00000186862_PDZD7,0;ENSG00000107819_SFXN3,940			0.0035382	0.20716	Diagnosis	Immature
chr10:102055661-102056558	ENSG00000120029_ARMH3,0	ENSG00000120029_ARMH3,0			0.000354088	0.171004	Diagnosis	Immature
chr10:102244954-102245872	ENSG00000107862_GBF1,0	ENSG00000107862_GBF1,0			0.00711387	0.238659	Diagnosis	Immature
chr10:102410290-102411115		ENSG00000059915_PSD,10424			0.00714095	0.239009	Diagnosis	Immature
chr10:102432181-102433038	ENSG00000107874_CUEDC2,0	ENSG00000107874_CUEDC2,0			0.0026001	0.1959	Diagnosis	Immature
chr10:102450194-102451088	ENSG00000269609_RPARP-AS1,378;ENSG00000120055_C10orf95,455	ENSG00000269609_RPARP-AS1,378;ENSG00000120055_C10orf95,455			0.00693073	0.237705	Diagnosis	Immature
chr10:102641849-102642761	ENSG00000171206_TRIM8,0;ENSG00000272933_AL391121.1,1379	ENSG00000171206_TRIM8,0			0.00591164	0.229811	Diagnosis	Immature
chr10:102743392-102744286	ENSG00000166272_WBP1L,0	ENSG00000166272_WBP1L,0;ENSG00000156398_SFXN2,28854			0.00149842	0.182371	Diagnosis	Immature
chr10:102853966-102854844	ENSG00000166275_BORCS7,0;ENSG00000282772_AL358790.1,0	ENSG00000282772_AL358790.1,0;ENSG00000166275_BORCS7,0			0.00243558	0.193625	Diagnosis	Immature
chr10:102917733-102918606	ENSG00000148842_CNNM2,0;ENSG00000286575_AL356608.3,0	ENSG00000286575_AL356608.3,0;ENSG00000148842_CNNM2,0			0.00132303	0.181124	Diagnosis	Immature
chr10:103470929-103471830					0.00762523	0.240176	Diagnosis	Immature
chr10:103966749-103967630	ENSG00000065613_SLK,0	ENSG00000065613_SLK,0			0.00733981	0.239832	Diagnosis	Immature
chr10:104231944-104232849	ENSG00000197748_CFAP43,0	ENSG00000197748_CFAP43,0			0.00256965	0.195293	Diagnosis	Immature
chr10:104268633-104269550	ENSG00000065621_GSTO2,0	ENSG00000065621_GSTO2,0			0.0058699	0.229278	Diagnosis	Immature
chr10:110225706-110226400		ENSG00000119950_MXI1,18101			0.000635779	0.171004	Diagnosis	Immature
chr10:110304498-110305357	ENSG00000119953_SMNDC1,0	ENSG00000119953_SMNDC1,0			0.0005979	0.171004	Diagnosis	Immature
chr10:111989103-111990032	ENSG00000287231_AL136119.1,0	ENSG00000287231_AL136119.1,0			0.00784976	0.24232	Diagnosis	Immature
chr10:112945582-112946448					0.00868775	0.24693	Diagnosis	Immature
chr10:112949656-112950531	ENSG00000148737_TCF7L2,0;ENSG00000233547_AL158212.2,1344	ENSG00000148737_TCF7L2,0			0.00805248	0.243514	Diagnosis	Immature
chr10:113891309-113892197		ENSG00000196865_NHLRC2,36648			0.00621634	0.232369	Diagnosis	Immature
chr10:115092779-115093668	ENSG00000107518_ATRNL1,0	ENSG00000107518_ATRNL1,0			0.00367128	0.209039	Diagnosis	Immature
chr10:116742184-116743102		ENSG00000165868_HSPA12A,107134			0.00153836	0.182746	Diagnosis	Immature
chr10:119080361-119081184	ENSG00000107581_EIF3A,0	ENSG00000107581_EIF3A,0			0.00108561	0.17692	Diagnosis	Immature
chr10:119103750-119104582	ENSG00000119979_DENND10,0	ENSG00000119979_DENND10,0			0.00892091	0.249507	Diagnosis	Immature
chr10:119165210-119166130	ENSG00000183605_SFXN4,0	ENSG00000183605_SFXN4,0			0.0068209	0.237478	Diagnosis	Immature
chr10:119206956-119207776	ENSG00000228485_GRK5-IT1,-755;ENSG00000198873_GRK5,0	ENSG00000198873_GRK5,0			0.000675457	0.171004	Diagnosis	Immature
chr10:119378442-119379312		ENSG00000198873_GRK5,170871			0.00427381	0.212613	Diagnosis	Immature
chr10:119596630-119597456	ENSG00000151923_TIAL1,0	ENSG00000151923_TIAL1,0			0.000287344	0.171004	Diagnosis	Immature
chr10:119750257-119751145		ENSG00000198825_INPP5F,24215			0.00295066	0.198734	Diagnosis	Immature
chr10:120945750-120946655		ENSG00000227307_AC010998.1,34045			0.00425232	0.212613	Diagnosis	Immature
chr10:122331403-122332295		ENSG00000138152_BTBD16,60107			0.00423494	0.212613	Diagnosis	Immature
chr10:122980101-122981017		ENSG00000179988_PSTK,25720			0.000498326	0.171004	Diagnosis	Immature
chr10:124724338-124725263		ENSG00000189319_FAM53B,19115			0.00630565	0.232937	Diagnosis	Immature
chr10:124916419-124917278	ENSG00000249456_AL731577.2,0	ENSG00000249456_AL731577.2,0			0.00426807	0.212613	Diagnosis	Immature
chr10:125062642-125063511		ENSG00000175029_CTBP2,97659			0.00196257	0.186248	Diagnosis	Immature
chr10:125719091-125719973	ENSG00000234134_AL158835.2,0;ENSG00000107938_EDRF1,0;ENSG00000224023_EDRF1-DT,0	ENSG00000224023_EDRF1-DT,0;ENSG00000234134_AL158835.2,0;ENSG00000107938_EDRF1,0			0.000694094	0.171004	Diagnosis	Immature
chr10:126561329-126562182		ENSG00000154493_C10orf90,236526			0.00329708	0.203762	Diagnosis	Immature
chr10:126628500-126629428		ENSG00000154493_C10orf90,169280			0.00812899	0.243514	Diagnosis	Immature
chr10:126935246-126936097		ENSG00000150760_DOCK1,29837			0.00702699	0.238109	Diagnosis	Immature
chr10:127619462-127620287					0.00116179	0.177939	Diagnosis	Immature
chr10:130110462-130111234	ENSG00000237489_C10orf143,0	ENSG00000237489_C10orf143,0			0.00234051	0.193625	Diagnosis	Immature
chr10:130136007-130136861	ENSG00000108010_GLRX3,0	ENSG00000108010_GLRX3,0			0.00211222	0.189995	Diagnosis	Immature
chr10:132186463-132187317	ENSG00000235010_AL512622.1,-501;ENSG00000151640_DPYSL4,0	ENSG00000151640_DPYSL4,0			0.00358906	0.208274	Diagnosis	Immature
chr10:132307673-132308542		ENSG00000165752_STK32C,23305			0.00425046	0.212613	Diagnosis	Immature
chr10:132331560-132332484	ENSG00000165752_STK32C,0;ENSG00000148814_LRRC27,0	ENSG00000165752_STK32C,0;ENSG00000148814_LRRC27,0			0.00150082	0.182371	Diagnosis	Immature
chr10:132537117-132538024	ENSG00000068383_INPP5A,0	ENSG00000068383_INPP5A,0			0.00489494	0.220175	Diagnosis	Immature
chr10:132735650-132736426		ENSG00000068383_INPP5A,197863			0.00576521	0.227797	Diagnosis	Immature
chr10:132738305-132739159		ENSG00000068383_INPP5A,200518			0.00516096	0.222101	Diagnosis	Immature
chr10:133089114-133090003	ENSG00000256925_ADGRA1-AS1,-623	ENSG00000197177_ADGRA1,18185			0.00900507	0.249934	Diagnosis	Immature
chr10:133336477-133337373	ENSG00000130643_CALY,0	ENSG00000130643_CALY,0			0.00632708	0.233135	Diagnosis	Immature
chr10:133393734-133394635	ENSG00000148824_MTG1,0	ENSG00000148824_MTG1,0			0.00102804	0.176647	Diagnosis	Immature
chr10:133453426-133454260	ENSG00000214279_SCART1,0	ENSG00000214279_SCART1,0			0.00257883	0.195372	Diagnosis	Immature
chr11:207030-207939	ENSG00000177951_BET1L,0;ENSG00000177963_RIC8A,0	ENSG00000177951_BET1L,0;ENSG00000177963_RIC8A,0			0.0034192	0.205115	Diagnosis	Immature
chr11:369027-369872	ENSG00000182272_B4GALNT4,0	ENSG00000182272_B4GALNT4,0			0.00418626	0.212385	Diagnosis	Immature
chr11:447836-448738	ENSG00000174915_PTDSS2,0	ENSG00000174915_PTDSS2,0			0.00277102	0.196728	Diagnosis	Immature
chr11:449871-450736	ENSG00000174915_PTDSS2,1603	ENSG00000174915_PTDSS2,1603			0.00278338	0.196728	Diagnosis	Immature
chr11:502910-503755		ENSG00000023191_RNH1,3545			0.00261768	0.1959	Diagnosis	Immature
chr11:575682-576619	ENSG00000070047_PHRF1,0	ENSG00000070047_PHRF1,0			0.000291227	0.171004	Diagnosis	Immature
chr11:695070-695788	ENSG00000177042_TMEM80,0;ENSG00000177106_EPS8L2,632	ENSG00000177042_TMEM80,0;ENSG00000177106_EPS8L2,632;ENSG00000177030_DEAF1,10927			2.97941e-05	0.171004	Diagnosis	Immature
chr11:729310-730213					0.00144007	0.182371	Diagnosis	Immature
chr11:809203-810095	ENSG00000177595_PIDD1,0;ENSG00000177600_RPLP2,0	ENSG00000177595_PIDD1,0;ENSG00000177600_RPLP2,0			0.000260374	0.171004	Diagnosis	Immature
chr11:1262312-1263216					0.00526084	0.223054	Diagnosis	Immature
chr11:1276063-1276968		ENSG00000078902_TOLLIP,32686			0.005474	0.224691	Diagnosis	Immature
chr11:1389258-1390185	ENSG00000174672_BRSK2,0	ENSG00000174672_BRSK2,0			0.0020909	0.1888	Diagnosis	Immature
chr11:1390778-1391740	ENSG00000174672_BRSK2,879	ENSG00000174672_BRSK2,879			0.00758593	0.240176	Diagnosis	Immature
chr11:2561872-2562764		ENSG00000053918_KCNQ1,117188			0.00329331	0.203762	Diagnosis	Immature
chr11:2699692-2700605	ENSG00000269821_KCNQ1OT1,0	ENSG00000269821_KCNQ1OT1,0;ENSG00000053918_KCNQ1,255008			0.00282028	0.196728	Diagnosis	Immature
chr11:2728559-2729403		ENSG00000053918_KCNQ1,283875			0.00311453	0.200884	Diagnosis	Immature
chr11:2869190-2869991	ENSG00000237941_KCNQ1DN,-42				0.00196294	0.186248	Diagnosis	Immature
chr11:3057056-3057979	ENSG00000285644_AC108448.3,0;ENSG00000110619_CARS,0	ENSG00000110619_CARS,0;ENSG00000285644_AC108448.3,0			0.0020201	0.187279	Diagnosis	Immature
chr11:3160095-3161032		ENSG00000021762_OSBPL5,5707			0.000869462	0.174388	Diagnosis	Immature
chr11:3378723-3379598	ENSG00000005801_ZNF195,0	ENSG00000005801_ZNF195,0			0.00139041	0.182371	Diagnosis	Immature
chr11:3797270-3798185	ENSG00000148985_PGAP2,0;ENSG00000110713_NUP98,0	ENSG00000110713_NUP98,0;ENSG00000148985_PGAP2,0			6.82293e-05	0.171004	Diagnosis	Immature
chr11:6251822-6252466					0.000633944	0.171004	Diagnosis	Immature
chr11:6411191-6412021		ENSG00000166313_APBB1,7393			0.00222013	0.191381	Diagnosis	Immature
chr11:6473534-6474457	ENSG00000110171_TRIM3,2	ENSG00000110171_TRIM3,2			0.00156935	0.182746	Diagnosis	Immature
chr11:6497916-6498798	ENSG00000179532_DNHD1,656	ENSG00000179532_DNHD1,656			0.00725424	0.239479	Diagnosis	Immature
chr11:6682993-6683856	ENSG00000158042_MRPL17,0	ENSG00000158042_MRPL17,0			0.000538065	0.171004	Diagnosis	Immature
chr11:7456898-7457763		ENSG00000251364_AC107884.1,55881;ENSG00000170743_SYT9,218120			0.00338439	0.205115	Diagnosis	Immature
chr11:8688555-8689450		ENSG00000166441_RPL27A,5767			0.00352056	0.206832	Diagnosis	Immature
chr11:8964103-8964936	ENSG00000254860_TMEM9B-AS1,0;ENSG00000175348_TMEM9B,75	ENSG00000254860_TMEM9B-AS1,0;ENSG00000175348_TMEM9B,75			0.00196789	0.186248	Diagnosis	Immature
chr11:9264884-9265758	ENSG00000184014_DENND5A,0	ENSG00000184014_DENND5A,0			0.00119274	0.177939	Diagnosis	Immature
chr11:9364029-9364917					0.00307785	0.200127	Diagnosis	Immature
chr11:9384321-9385139	ENSG00000205339_IPO7,0	ENSG00000205339_IPO7,0			0.00676372	0.237192	Diagnosis	Immature
chr11:9565693-9566585					0.00200044	0.186503	Diagnosis	Immature
chr11:9573064-9573994	ENSG00000166483_WEE1,0	ENSG00000166483_WEE1,0			0.00629402	0.232935	Diagnosis	Immature
chr11:10293649-10294518	ENSG00000133812_SBF2,0	ENSG00000133812_SBF2,0			0.00819554	0.243792	Diagnosis	Immature
chr11:10808581-10809501	ENSG00000110321_EIF4G2,0;ENSG00000246308_AC116535.1,0	ENSG00000110321_EIF4G2,0;ENSG00000246308_AC116535.1,0			0.00434399	0.21268	Diagnosis	Immature
chr11:10857712-10858578	ENSG00000247271_ZBED5-AS1,0;ENSG00000236287_ZBED5,218	ENSG00000247271_ZBED5-AS1,0;ENSG00000236287_ZBED5,218			0.000200185	0.171004	Diagnosis	Immature
chr11:13277150-13278057	ENSG00000133794_ARNTL,498	ENSG00000133794_ARNTL,498			0.00427286	0.212613	Diagnosis	Immature
chr11:14519922-14520806		ENSG00000129084_PSMA1,122829			0.00180778	0.184273	Diagnosis	Immature
chr11:14891822-14892556	ENSG00000186104_CYP2R1,0	ENSG00000186104_CYP2R1,0			0.00145403	0.182371	Diagnosis	Immature
chr11:16738111-16739020	ENSG00000110693_SOX6,571	ENSG00000110693_SOX6,571;ENSG00000110696_C11orf58,124979			0.00862479	0.245995	Diagnosis	Immature
chr11:17207556-17208434	ENSG00000011405_PIK3C2A,0;ENSG00000070081_NUCB2,0	ENSG00000011405_PIK3C2A,0;ENSG00000070081_NUCB2,0			0.00861511	0.245908	Diagnosis	Immature
chr11:18394072-18394994	ENSG00000134333_LDHA,0	ENSG00000134333_LDHA,0			0.00241722	0.193625	Diagnosis	Immature
chr11:18395726-18396654	ENSG00000134333_LDHA,1166	ENSG00000134333_LDHA,1166			0.000886602	0.174388	Diagnosis	Immature
chr11:18736393-18737319		ENSG00000254966_AC103974.1,29856;ENSG00000110786_PTPN5,55402			0.00678273	0.237192	Diagnosis	Immature
chr11:20363454-20364312	ENSG00000109854_HTATIP2,0	ENSG00000109854_HTATIP2,0			0.007995	0.243514	Diagnosis	Immature
chr11:22625307-22626135	ENSG00000148935_GAS2,0;ENSG00000183161_FANCF,0	ENSG00000183161_FANCF,0;ENSG00000148935_GAS2,0			0.00158456	0.182746	Diagnosis	Immature
chr11:22829404-22830277	ENSG00000198168_SVIP,22;ENSG00000246225_AC006299.1,24	ENSG00000198168_SVIP,22;ENSG00000246225_AC006299.1,24			0.000665919	0.171004	Diagnosis	Immature
chr11:28107835-28108733	ENSG00000121621_KIF18A,0;ENSG00000169519_METTL15,0	ENSG00000121621_KIF18A,0;ENSG00000169519_METTL15,0			0.00110128	0.17692	Diagnosis	Immature
chr11:30016688-30017541	ENSG00000182255_KCNA4,0	ENSG00000182255_KCNA4,0			0.00844314	0.244527	Diagnosis	Immature
chr11:31509333-31510222	ENSG00000148950_IMMP1L,0;ENSG00000109911_ELP4,0	ENSG00000148950_IMMP1L,0;ENSG00000109911_ELP4,0			0.00297265	0.199093	Diagnosis	Immature
chr11:33039106-33039959	ENSG00000176148_TCP11L1,0	ENSG00000176148_TCP11L1,0			0.00168972	0.184273	Diagnosis	Immature
chr11:33257897-33258675	ENSG00000110422_HIPK3,1225	ENSG00000110422_HIPK3,1225			0.00656376	0.235673	Diagnosis	Immature
chr11:33700419-33701291	ENSG00000205177_C11orf91,0	ENSG00000205177_C11orf91,0			0.00164126	0.183679	Diagnosis	Immature
chr11:34262302-34263177		ENSG00000166016_ABTB2,94833			0.00760412	0.240176	Diagnosis	Immature
chr11:34438471-34439334	ENSG00000121691_CAT,0	ENSG00000121691_CAT,0			0.00366639	0.209039	Diagnosis	Immature
chr11:34916013-34916905	ENSG00000149089_APIP,0;ENSG00000110435_PDHX,184	ENSG00000149089_APIP,0;ENSG00000110435_PDHX,184			0.00550119	0.224691	Diagnosis	Immature
chr11:35531073-35531857	ENSG00000149090_PAMR1,-773				0.00850146	0.244964	Diagnosis	Immature
chr11:36295730-36296613	ENSG00000135362_PRR5L,0	ENSG00000135362_PRR5L,0			0.00621073	0.232296	Diagnosis	Immature
chr11:41665344-41666232		ENSG00000255388_LINC02741,48260			0.00623896	0.232369	Diagnosis	Immature
chr11:43680210-43681087	ENSG00000149084_HSD17B12,0	ENSG00000149084_HSD17B12,0;ENSG00000283341_AC068205.2,101321			0.00783009	0.242172	Diagnosis	Immature
chr11:43942029-43942929		ENSG00000187479_C11orf96,16687;ENSG00000254409_AC087521.3,20970			0.00323806	0.202248	Diagnosis	Immature
chr11:44033258-44034150					0.00462592	0.21724	Diagnosis	Immature
chr11:44564968-44565860	ENSG00000085117_CD82,541	ENSG00000085117_CD82,541			0.00215326	0.191014	Diagnosis	Immature
chr11:44592930-44593796		ENSG00000085117_CD82,28503			0.00344206	0.205167	Diagnosis	Immature
chr11:46700273-46701149	ENSG00000175220_ARHGAP1,0;ENSG00000175213_ZNF408,0	ENSG00000175220_ARHGAP1,0;ENSG00000175213_ZNF408,0			0.00127539	0.180403	Diagnosis	Immature
chr11:47214348-47215073	ENSG00000134574_DDB2,0	ENSG00000134574_DDB2,0			0.0058983	0.229534	Diagnosis	Immature
chr11:47980175-47981029	ENSG00000149177_PTPRJ,0	ENSG00000149177_PTPRJ,0			0.00306811	0.2	Diagnosis	Immature
chr11:57649548-57650442	ENSG00000166793_YPEL4,0;ENSG00000172409_CLP1,556	ENSG00000166793_YPEL4,0;ENSG00000172409_CLP1,556;ENSG00000254602_AP000662.1,11524			0.00352705	0.206832	Diagnosis	Immature
chr11:57667409-57668244	ENSG00000156599_ZDHHC5,0	ENSG00000156599_ZDHHC5,0			0.00159036	0.182746	Diagnosis	Immature
chr11:58578696-58579445	ENSG00000110031_LPXN,-476;ENSG00000186660_ZFP91,0	ENSG00000186660_ZFP91,0			0.00270752	0.196728	Diagnosis	Immature
chr11:59171467-59172426	ENSG00000110042_DTX4,37	ENSG00000110042_DTX4,37			0.000237188	0.171004	Diagnosis	Immature
chr11:59668779-59669681	ENSG00000166889_PATL1,0;ENSG00000255355_AP000640.2,0	ENSG00000166889_PATL1,0;ENSG00000255355_AP000640.2,0			0.00872364	0.247083	Diagnosis	Immature
chr11:60906167-60907061	ENSG00000110107_PRPF19,0;ENSG00000257052_AP003721.4,0	ENSG00000110107_PRPF19,0;ENSG00000257052_AP003721.4,0			0.00170527	0.184273	Diagnosis	Immature
chr11:61749464-61750406		ENSG00000124915_MYRF-AS1,7249			0.00334343	0.204912	Diagnosis	Immature
chr11:61967207-61968097	ENSG00000167996_FTH1,0	ENSG00000167996_FTH1,0			0.000364799	0.171004	Diagnosis	Immature
chr11:62573585-62574505	ENSG00000254772_EEF1G,0	ENSG00000254772_EEF1G,0			0.00231011	0.193625	Diagnosis	Immature
chr11:62591337-62592224	ENSG00000149016_TUT1,0	ENSG00000149016_TUT1,0			0.00899288	0.24992	Diagnosis	Immature
chr11:62652877-62653786	ENSG00000185085_INTS5,0	ENSG00000185085_INTS5,0			0.0053384	0.223491	Diagnosis	Immature
chr11:62761083-62761976	ENSG00000168002_POLR2G,0	ENSG00000168002_POLR2G,0			0.00333158	0.204864	Diagnosis	Immature
chr11:62805040-62805951	ENSG00000162231_NXF1,351	ENSG00000162231_NXF1,351			0.00138168	0.182371	Diagnosis	Immature
chr11:63671223-63672039	ENSG00000184743_ATL3,0	ENSG00000184743_ATL3,0			0.000474715	0.171004	Diagnosis	Immature
chr11:63813053-63813854	ENSG00000168005_SPINDOC,0	ENSG00000168005_SPINDOC,0			0.00480467	0.21978	Diagnosis	Immature
chr11:63838543-63839422	ENSG00000072518_MARK2,0	ENSG00000072518_MARK2,0			0.0067298	0.236952	Diagnosis	Immature
chr11:64047776-64048680		ENSG00000256824_AP000721.2,11806;ENSG00000133315_MACROD1,117433			0.000100032	0.171004	Diagnosis	Immature
chr11:64092082-64092943		ENSG00000256824_AP000721.2,56112;ENSG00000133315_MACROD1,73170			0.00593889	0.229985	Diagnosis	Immature
chr11:64240919-64241775	ENSG00000173486_FKBP2,0;ENSG00000286264_AP001453.3,0	ENSG00000173486_FKBP2,0;ENSG00000286264_AP001453.3,0			3.91966e-05	0.171004	Diagnosis	Immature
chr11:64247042-64247758	ENSG00000173457_PPP1R14B,-99;ENSG00000256940_PPP1R14B-AS1,1081;ENSG00000257086_AP001453.2,1736	ENSG00000256940_PPP1R14B-AS1,1081;ENSG00000257086_AP001453.2,1736			0.00629168	0.232935	Diagnosis	Immature
chr11:64300660-64301499	ENSG00000219435_CATSPERZ,302	ENSG00000219435_CATSPERZ,302			0.00580995	0.228324	Diagnosis	Immature
chr11:64317662-64318429	ENSG00000173113_TRMT112,0;ENSG00000126432_PRDX5,0	ENSG00000173113_TRMT112,0;ENSG00000126432_PRDX5,0			0.000494401	0.171004	Diagnosis	Immature
chr11:64643188-64644058		ENSG00000110076_NRXN2,79130			0.00640488	0.234058	Diagnosis	Immature
chr11:64778397-64779331	ENSG00000168066_SF1,0;ENSG00000269038_AP001462.1,0	ENSG00000168066_SF1,0;ENSG00000269038_AP001462.1,0			0.00737329	0.240085	Diagnosis	Immature
chr11:64878251-64879167		ENSG00000110047_EHD1,9129			8.85447e-05	0.171004	Diagnosis	Immature
chr11:64923942-64924903		ENSG00000068971_PPP2R5B,6389			0.000571751	0.171004	Diagnosis	Immature
chr11:65040702-65041580	ENSG00000168061_SAC3D1,0	ENSG00000168061_SAC3D1,0			0.00114687	0.177651	Diagnosis	Immature
chr11:65111394-65112250	ENSG00000254501_AP003068.1,0;ENSG00000149809_TM7SF2,0	ENSG00000254501_AP003068.1,0;ENSG00000149809_TM7SF2,0;ENSG00000149823_VPS51,22070			0.000750076	0.172121	Diagnosis	Immature
chr11:65134345-65135200	ENSG00000162298_SYVN1,0	ENSG00000162298_SYVN1,0			0.00440144	0.213478	Diagnosis	Immature
chr11:65291491-65292245		ENSG00000014138_POLA2,29571			0.00435789	0.21268	Diagnosis	Immature
chr11:65333473-65334324	ENSG00000133884_DPF2,0	ENSG00000133884_DPF2,0			0.00237015	0.193625	Diagnosis	Immature
chr11:65487320-65488207	ENSG00000286756_AP000769.6,0;ENSG00000279243_LINC02736,507	ENSG00000286756_AP000769.6,0;ENSG00000279243_LINC02736,507			0.000614572	0.171004	Diagnosis	Immature
chr11:65540271-65541097		ENSG00000168056_LTBP3,17833			0.00428486	0.212666	Diagnosis	Immature
chr11:65569850-65570730	ENSG00000176973_FAM89B,-1619;ENSG00000260233_SSSCA1-AS1,0;ENSG00000173465_ZNRD2,0	ENSG00000260233_SSSCA1-AS1,0;ENSG00000173465_ZNRD2,0			0.000879686	0.174388	Diagnosis	Immature
chr11:65573854-65574771	ENSG00000173442_EHBP1L1,-1275;ENSG00000176973_FAM89B,1505	ENSG00000176973_FAM89B,1505;ENSG00000173465_ZNRD2,3394			0.00420829	0.212499	Diagnosis	Immature
chr11:65652334-65653212					0.00152133	0.182746	Diagnosis	Immature
chr11:65711748-65712682	ENSG00000172977_KAT5,0	ENSG00000172977_KAT5,0			0.000290924	0.171004	Diagnosis	Immature
chr11:65817810-65818705					0.00842947	0.244527	Diagnosis	Immature
chr11:65857829-65858615	ENSG00000172732_MUS81,703	ENSG00000172732_MUS81,703;ENSG00000172757_CFL1,3411			0.00654501	0.235673	Diagnosis	Immature
chr11:65873233-65874137	ENSG00000172638_EFEMP2,0	ENSG00000172638_EFEMP2,0			0.00274845	0.196728	Diagnosis	Immature
chr11:65893114-65893948		ENSG00000175592_FOSL1,6625			0.0073784	0.240085	Diagnosis	Immature
chr11:65918807-65919720	ENSG00000175573_C11orf68,0;ENSG00000175550_DRAP1,0	ENSG00000175573_C11orf68,0;ENSG00000175550_DRAP1,0			0.00187861	0.184273	Diagnosis	Immature
chr11:66002005-66002967	ENSG00000175376_EIF1AD,0;ENSG00000175334_BANF1,0	ENSG00000175376_EIF1AD,0;ENSG00000175334_BANF1,0			0.000437565	0.171004	Diagnosis	Immature
chr11:66257519-66258035	ENSG00000174996_KLC2,225	ENSG00000174996_KLC2,225			0.00474956	0.219154	Diagnosis	Immature
chr11:66277676-66278589	ENSG00000254452_AP001107.2,-184;ENSG00000174871_CNIH2,0;ENSG00000245156_AP001107.1,0	ENSG00000245156_AP001107.1,0;ENSG00000174871_CNIH2,0			0.00692992	0.237705	Diagnosis	Immature
chr11:66344690-66345606	ENSG00000174744_BRMS1,0	ENSG00000174744_BRMS1,0;ENSG00000174684_B4GAT1,2023			0.00494743	0.220578	Diagnosis	Immature
chr11:66408392-66409323	ENSG00000254510_AP001107.5,0	ENSG00000254510_AP001107.5,0			0.0013574	0.181375	Diagnosis	Immature
chr11:66856061-66856861	ENSG00000173621_LRFN4,0	ENSG00000173621_LRFN4,0;ENSG00000173599_PC,101525			0.00416593	0.212361	Diagnosis	Immature
chr11:67266002-67266875	ENSG00000173020_GRK2,0	ENSG00000173020_GRK2,0			0.00585171	0.229278	Diagnosis	Immature
chr11:67353144-67354021	ENSG00000274251_AP003419.2,0	ENSG00000274251_AP003419.2,0;ENSG00000175482_POLD4,2951;ENSG00000172613_RAD9A,35273			0.000254995	0.171004	Diagnosis	Immature
chr11:67410025-67410926		ENSG00000175463_TBC1D10C,6110;ENSG00000172531_PPP1CA,10257			0.00378934	0.209409	Diagnosis	Immature
chr11:67443096-67443997	ENSG00000172725_CORO1B,0	ENSG00000172725_CORO1B,0			0.00700075	0.237986	Diagnosis	Immature
chr11:67507945-67508849	ENSG00000110697_PITPNM1,-1682;ENSG00000167797_CDK2AP2,0	ENSG00000167797_CDK2AP2,0			0.00811227	0.243514	Diagnosis	Immature
chr11:68121053-68121971	ENSG00000110721_CHKA,0;ENSG00000255236_AP002992.1,0	ENSG00000110721_CHKA,0;ENSG00000255236_AP002992.1,0			0.000331033	0.171004	Diagnosis	Immature
chr11:68903495-68904352	ENSG00000197345_MRPL21,0;ENSG00000132740_IGHMBP2,0	ENSG00000197345_MRPL21,0;ENSG00000132740_IGHMBP2,0			0.0083947	0.244479	Diagnosis	Immature
chr11:69156997-69157933	ENSG00000284713_SMIM38,1519	ENSG00000284713_SMIM38,1519;ENSG00000261070_AP003071.2,13631			0.00146801	0.182371	Diagnosis	Immature
chr11:70270184-70271076	ENSG00000131626_PPFIA1,0	ENSG00000131626_PPFIA1,0			0.00884913	0.248375	Diagnosis	Immature
chr11:71928420-71929277	ENSG00000254469_AP002495.1,0;ENSG00000137522_RNF121,0	ENSG00000254469_AP002495.1,0;ENSG00000137522_RNF121,0			0.00148856	0.182371	Diagnosis	Immature
chr11:72040491-72041362		ENSG00000137497_NUMA1,39331			0.00526218	0.223054	Diagnosis	Immature
chr11:72112061-72112938	ENSG00000110203_FOLR3,-1931;ENSG00000110200_ANAPC15,0	ENSG00000110200_ANAPC15,0			0.000161251	0.171004	Diagnosis	Immature
chr11:72722071-72722934		ENSG00000186635_ARAP1,70665			0.00655699	0.235673	Diagnosis	Immature
chr11:72793469-72794375	ENSG00000186635_ARAP1,0;ENSG00000214530_STARD10,0	ENSG00000186635_ARAP1,0;ENSG00000214530_STARD10,0;ENSG00000285693_AP002381.2,19679			0.00455652	0.216387	Diagnosis	Immature
chr11:73982727-73983649	ENSG00000175567_UCP2,0;ENSG00000287425_AP003717.4,0	ENSG00000175567_UCP2,0;ENSG00000287425_AP003717.4,0			0.000906101	0.176098	Diagnosis	Immature
chr11:74683042-74683965					0.00359374	0.208274	Diagnosis	Immature
chr11:74948732-74949658	ENSG00000166435_XRRA1,0;ENSG00000118363_SPCS2,0	ENSG00000166435_XRRA1,0;ENSG00000118363_SPCS2,0			0.00149645	0.182371	Diagnosis	Immature
chr11:75525498-75526383	ENSG00000158555_GDPD5,0	ENSG00000158555_GDPD5,0			0.00351109	0.206832	Diagnosis	Immature
chr11:76380694-76381587	ENSG00000137492_THAP12,0;ENSG00000179240_GVQW3,0	ENSG00000137492_THAP12,0;ENSG00000179240_GVQW3,0			0.00637263	0.233896	Diagnosis	Immature
chr11:76860429-76861311	ENSG00000078124_ACER3,0	ENSG00000078124_ACER3,0			0.00192738	0.185979	Diagnosis	Immature
chr11:77109208-77110157		ENSG00000149260_CAPN5,42247			0.00337622	0.205115	Diagnosis	Immature
chr11:77473735-77474508	ENSG00000149269_PAK1,127;ENSG00000268635_AP003680.1,364	ENSG00000149269_PAK1,127;ENSG00000268635_AP003680.1,364			0.00535688	0.223752	Diagnosis	Immature
chr11:77589355-77590246	ENSG00000178301_AQP11,0	ENSG00000178301_AQP11,0;ENSG00000074201_CLNS1A,47548			0.00397531	0.211609	Diagnosis	Immature
chr11:77820507-77821411	ENSG00000048649_RSF1,0;ENSG00000087884_AAMDC,0	ENSG00000048649_RSF1,0;ENSG00000087884_AAMDC,0			0.00026385	0.171004	Diagnosis	Immature
chr11:77994421-77995345	ENSG00000149262_INTS4,0	ENSG00000149262_INTS4,0			0.00459993	0.216661	Diagnosis	Immature
chr11:78318503-78319333		ENSG00000033327_GAB2,99015			0.00498302	0.221118	Diagnosis	Immature
chr11:78331446-78332369		ENSG00000254420_AP003086.1,6688;ENSG00000033327_GAB2,85979			0.00177571	0.184273	Diagnosis	Immature
chr11:78417480-78418341	ENSG00000033327_GAB2,7	ENSG00000033327_GAB2,7;ENSG00000254420_AP003086.1,92722			0.00504957	0.221192	Diagnosis	Immature
chr11:82989028-82989910		ENSG00000254698_AP000893.2,49205;ENSG00000137502_RAB30,82013			0.00176911	0.184273	Diagnosis	Immature
chr11:83071515-83072434	ENSG00000137502_RAB30,0;ENSG00000246067_RAB30-DT,0	ENSG00000137502_RAB30,0;ENSG00000246067_RAB30-DT,0;ENSG00000255503_AP001767.3,24762			0.00816718	0.243773	Diagnosis	Immature
chr11:83285725-83286650	ENSG00000255234_AP000446.1,0;ENSG00000137500_CCDC90B,0	ENSG00000137500_CCDC90B,0;ENSG00000255234_AP000446.1,0			0.00281553	0.196728	Diagnosis	Immature
chr11:85627983-85628868	ENSG00000150672_DLG2,-61;ENSG00000171204_TMEM126B,0	ENSG00000171204_TMEM126B,0			0.000690641	0.171004	Diagnosis	Immature
chr11:85664610-85665423		ENSG00000137504_CREBZF,17485			0.00208927	0.1888	Diagnosis	Immature
chr11:86068713-86069611	ENSG00000073921_PICALM,271	ENSG00000073921_PICALM,271			0.00383915	0.210077	Diagnosis	Immature
chr11:86244538-86245336	ENSG00000074266_EED,0	ENSG00000074266_EED,0			0.000552682	0.171004	Diagnosis	Immature
chr11:86519116-86520031		ENSG00000254733_AP001831.1,87526;ENSG00000151376_ME3,152605			0.00799676	0.243514	Diagnosis	Immature
chr11:86955071-86955928	ENSG00000174804_FZD4,0;ENSG00000246523_FZD4-DT,0	ENSG00000174804_FZD4,0;ENSG00000246523_FZD4-DT,0			0.00307607	0.200127	Diagnosis	Immature
chr11:87037366-87038268	ENSG00000166575_TMEM135,0	ENSG00000166575_TMEM135,0			0.000622249	0.171004	Diagnosis	Immature
chr11:90222610-90223473	ENSG00000110172_CHORDC1,0	ENSG00000110172_CHORDC1,0			0.00214088	0.190507	Diagnosis	Immature
chr11:92224391-92225319					0.0059338	0.229948	Diagnosis	Immature
chr11:93741078-93741982	ENSG00000182919_C11orf54,0	ENSG00000182919_C11orf54,0;ENSG00000166012_TAF1D,42409			0.00112435	0.17692	Diagnosis	Immature
chr11:94128535-94129455	ENSG00000110218_PANX1,0	ENSG00000110218_PANX1,0			0.0047851	0.219586	Diagnosis	Immature
chr11:95066938-95067844	ENSG00000263465_SRSF8,0	ENSG00000263465_SRSF8,0			0.00217724	0.191381	Diagnosis	Immature
chr11:95089357-95090202	ENSG00000149218_ENDOD1,0	ENSG00000149218_ENDOD1,0			0.00612557	0.23142	Diagnosis	Immature
chr11:95151142-95151981	ENSG00000245552_AP000787.1,603	ENSG00000245552_AP000787.1,603			0.00173171	0.184273	Diagnosis	Immature
chr11:95790262-95790717	ENSG00000077458_FAM76B,0;ENSG00000166037_CEP57,297	ENSG00000077458_FAM76B,0;ENSG00000166037_CEP57,297			0.00496027	0.220716	Diagnosis	Immature
chr11:95848885-95849731		ENSG00000087053_MTMR2,75584			0.00266393	0.196147	Diagnosis	Immature
chr11:96342848-96343761	ENSG00000184384_MAML2,0	ENSG00000184384_MAML2,0			0.00456852	0.216559	Diagnosis	Immature
chr11:101914614-101915533	ENSG00000110318_CEP126,0;ENSG00000187151_ANGPTL5,989	ENSG00000110318_CEP126,0;ENSG00000187151_ANGPTL5,989			0.000794847	0.174388	Diagnosis	Immature
chr11:106077011-106077908	ENSG00000182359_KBTBD3,0;ENSG00000149313_AASDHPPT,1510	ENSG00000182359_KBTBD3,0;ENSG00000149313_AASDHPPT,1510			0.000399232	0.171004	Diagnosis	Immature
chr11:107017408-107018180	ENSG00000152402_GUCY1A2,344	ENSG00000152402_GUCY1A2,344			0.00672123	0.236926	Diagnosis	Immature
chr11:107565156-107566070	ENSG00000137760_ALKBH8,0	ENSG00000137760_ALKBH8,0			0.0067081	0.236893	Diagnosis	Immature
chr11:107590843-107591623	ENSG00000110675_ELMOD1,0	ENSG00000110675_ELMOD1,0			0.00702624	0.238109	Diagnosis	Immature
chr11:108222424-108223336	ENSG00000149311_ATM,0;ENSG00000149308_NPAT,0	ENSG00000149308_NPAT,0;ENSG00000149311_ATM,0			0.00170928	0.184273	Diagnosis	Immature
chr11:110032122-110032944		ENSG00000137710_RDX,263768			0.00577927	0.227797	Diagnosis	Immature
chr11:110323485-110324377					0.00282349	0.196728	Diagnosis	Immature
chr11:111936748-111937644		ENSG00000150764_DIXDC1,9604			0.00554002	0.224768	Diagnosis	Immature
chr11:111993408-111994295		ENSG00000150764_DIXDC1,66264			0.00394373	0.211609	Diagnosis	Immature
chr11:112962711-112963604	ENSG00000247416_AP000802.1,0;ENSG00000149294_NCAM1,1464	ENSG00000247416_AP000802.1,0;ENSG00000149294_NCAM1,1464			0.0067216	0.236926	Diagnosis	Immature
chr11:113314177-113315067	ENSG00000255129_AP000880.1,0;ENSG00000149292_TTC12,0	ENSG00000255129_AP000880.1,0;ENSG00000149292_TTC12,0			0.00247349	0.193871	Diagnosis	Immature
chr11:113715706-113716598					0.00287863	0.197162	Diagnosis	Immature
chr11:113773289-113774196	ENSG00000256603_AP003170.4,-1598;ENSG00000086827_ZW10,0	ENSG00000086827_ZW10,0			0.00349035	0.206308	Diagnosis	Immature
chr11:114400048-114400978	ENSG00000180425_C11orf71,0;ENSG00000076053_RBM7,18	ENSG00000180425_C11orf71,0;ENSG00000076053_RBM7,18			0.00195131	0.186248	Diagnosis	Immature
chr11:114439124-114439949	ENSG00000076043_REXO2,0	ENSG00000076043_REXO2,0			0.00617859	0.231831	Diagnosis	Immature
chr11:115078428-115079316					0.00837098	0.244285	Diagnosis	Immature
chr11:115502763-115503621	ENSG00000182985_CADM1,1336	ENSG00000182985_CADM1,1336			0.00380758	0.209765	Diagnosis	Immature
chr11:115961108-115961942					0.00523698	0.222892	Diagnosis	Immature
chr11:116772528-116773473	ENSG00000137656_BUD13,0;ENSG00000226645_AP006216.1,0	ENSG00000137656_BUD13,0;ENSG00000226645_AP006216.1,0			0.00630634	0.232937	Diagnosis	Immature
chr11:117232008-117232852	ENSG00000160613_PCSK7,0;ENSG00000167257_RNF214,0	ENSG00000160613_PCSK7,0;ENSG00000167257_RNF214,0			0.00115697	0.177858	Diagnosis	Immature
chr11:117315824-117316695	ENSG00000186318_BACE1,0;ENSG00000110274_CEP164,1267	ENSG00000186318_BACE1,0;ENSG00000110274_CEP164,1267;ENSG00000250699_AP000892.1,11343			0.00547719	0.224691	Diagnosis	Immature
chr11:117327520-117328388	ENSG00000250699_AP000892.1,0	ENSG00000250699_AP000892.1,0;ENSG00000110274_CEP164,12963			0.00555245	0.224869	Diagnosis	Immature
chr11:117673300-117674218		ENSG00000177103_DSCAML1,143307			0.00614189	0.23142	Diagnosis	Immature
chr11:117976799-117977674					0.006024	0.230409	Diagnosis	Immature
chr11:118359092-118360005	ENSG00000110344_UBE4A,0	ENSG00000110344_UBE4A,0			0.00899406	0.24992	Diagnosis	Immature
chr11:118607199-118608019	ENSG00000019144_PHLDB1,759	ENSG00000019144_PHLDB1,759			0.00220185	0.191381	Diagnosis	Immature
chr11:118689621-118690552					0.000861283	0.174388	Diagnosis	Immature
chr11:118790546-118791341	ENSG00000110367_DDX6,0;ENSG00000278376_AP004609.3,0	ENSG00000110367_DDX6,0;ENSG00000278376_AP004609.3,0			0.00165884	0.184273	Diagnosis	Immature
chr11:118925575-118926451	ENSG00000186174_BCL9L,0;ENSG00000110375_UPK2,411	ENSG00000186174_BCL9L,0;ENSG00000110375_UPK2,411			0.0062796	0.232881	Diagnosis	Immature
chr11:119056836-119057743	ENSG00000149428_HYOU1,0	ENSG00000149428_HYOU1,0			0.000205654	0.171004	Diagnosis	Immature
chr11:119095101-119095920	ENSG00000188486_H2AFX,0	ENSG00000188486_H2AFX,0			0.00335463	0.205073	Diagnosis	Immature
chr11:119106903-119107791	ENSG00000172269_DPAGT1,540	ENSG00000172269_DPAGT1,540;ENSG00000172375_C2CD2L,4705			0.00196189	0.186248	Diagnosis	Immature
chr11:119205690-119206595	ENSG00000110395_CBL,0	ENSG00000110395_CBL,0			0.00776276	0.241367	Diagnosis	Immature
chr11:119300082-119300984		ENSG00000110395_CBL,93806			0.0071084	0.238659	Diagnosis	Immature
chr11:119588709-119589632					0.00631292	0.233091	Diagnosis	Immature
chr11:119709383-119710314	ENSG00000255247_NECTIN1-AS1,0	ENSG00000255247_NECTIN1-AS1,0;ENSG00000110400_NECTIN1,18886			0.0053519	0.223628	Diagnosis	Immature
chr11:119728824-119729748	ENSG00000110400_NECTIN1,0;ENSG00000254854_AP003390.1,0	ENSG00000110400_NECTIN1,0;ENSG00000254854_AP003390.1,0			0.00538549	0.224103	Diagnosis	Immature
chr11:120894343-120895250	ENSG00000250493_AP004147.1,0	ENSG00000250493_AP004147.1,0;ENSG00000149403_GRIK4,382643			0.00894955	0.249867	Diagnosis	Immature
chr11:120985692-120986613		ENSG00000149403_GRIK4,473992			0.00899292	0.24992	Diagnosis	Immature
chr11:121451781-121452704	ENSG00000137642_SORL1,0;ENSG00000246790_AP000977.1,309	ENSG00000137642_SORL1,0;ENSG00000246790_AP000977.1,309			0.0052317	0.222892	Diagnosis	Immature
chr11:121722171-121723084		ENSG00000286044_AP001977.1,47910			0.00768762	0.241055	Diagnosis	Immature
chr11:122077346-122078184		ENSG00000255248_MIR100HG,478537			0.00300985	0.199762	Diagnosis	Immature
chr11:122212917-122213826		ENSG00000255248_MIR100HG,342895			0.00361484	0.208274	Diagnosis	Immature
chr11:123061965-123062860	ENSG00000288061_AP000926.2,0;ENSG00000109971_HSPA8,370	ENSG00000288061_AP000926.2,0;ENSG00000109971_HSPA8,370			0.000658713	0.171004	Diagnosis	Immature
chr11:124673338-124674255	ENSG00000064199_SPA17,0	ENSG00000064199_SPA17,0;ENSG00000110013_SIAE,21452			0.00242326	0.193625	Diagnosis	Immature
chr11:124739473-124740309	ENSG00000154146_NRGN,0	ENSG00000154146_NRGN,0			0.00433619	0.21268	Diagnosis	Immature
chr11:125333477-125334256		ENSG00000165495_PKNOX2,168790			0.00458948	0.216661	Diagnosis	Immature
chr11:129259549-129260427		ENSG00000134909_ARHGAP32,18897			0.00275531	0.196728	Diagnosis	Immature
chr11:130069307-130070192	ENSG00000084234_APLP2,1160	ENSG00000084234_APLP2,1160			0.00604947	0.230426	Diagnosis	Immature
chr11:130861653-130862558		ENSG00000254842_LINC02551,3003			0.00877883	0.247716	Diagnosis	Immature
chr11:131278316-131279234		ENSG00000231698_AP002856.2,24894			0.00724084	0.239479	Diagnosis	Immature
chr11:132187479-132188299		ENSG00000182667_NTM,817001			0.00613306	0.23142	Diagnosis	Immature
chr12:701681-702573					0.00239536	0.193625	Diagnosis	Immature
chr12:750883-751652	ENSG00000060237_WNK1,-927				0.001857	0.184273	Diagnosis	Immature
chr12:752207-752982	ENSG00000060237_WNK1,0	ENSG00000060237_WNK1,0			0.00385088	0.210077	Diagnosis	Immature
chr12:813936-814760		ENSG00000060237_WNK1,61357			0.00472559	0.218776	Diagnosis	Immature
chr12:1873643-1874458		ENSG00000151062_CACNA2D4,44208			0.00532155	0.223491	Diagnosis	Immature
chr12:2754228-2755075					0.0060867	0.231115	Diagnosis	Immature
chr12:2794406-2795220	ENSG00000004478_FKBP4,0	ENSG00000004478_FKBP4,0			0.000454085	0.171004	Diagnosis	Immature
chr12:2812271-2813156	ENSG00000111203_ITFG2,0;ENSG00000258325_ITFG2-AS1,0	ENSG00000258325_ITFG2-AS1,0;ENSG00000111203_ITFG2,0			0.000347268	0.171004	Diagnosis	Immature
chr12:4030899-4031794					0.00896781	0.24992	Diagnosis	Immature
chr12:4268957-4269884		ENSG00000255920_CCND2-AS1,6368			0.00475826	0.219283	Diagnosis	Immature
chr12:4273448-4274217	ENSG00000118971_CCND2,0	ENSG00000118971_CCND2,0;ENSG00000255920_CCND2-AS1,2035			0.00603011	0.230409	Diagnosis	Immature
chr12:6607063-6607953		ENSG00000111642_CHD4,6571			0.000991967	0.176418	Diagnosis	Immature
chr12:6613612-6614477	ENSG00000111642_CHD4,47	ENSG00000111642_CHD4,47			0.00374954	0.209409	Diagnosis	Immature
chr12:6752969-6753902		ENSG00000089693_MLF2,13573			0.00139901	0.182371	Diagnosis	Immature
chr12:6825270-6826129		ENSG00000250510_GPR162,3646			0.006752	0.237161	Diagnosis	Immature
chr12:6904385-6905278		ENSG00000010626_LRRC23,30816			0.00603397	0.230409	Diagnosis	Immature
chr12:6937608-6938473		ENSG00000111676_ATN1,13145			0.000667482	0.171004	Diagnosis	Immature
chr12:7129805-7130700	ENSG00000139194_RBP5,-916;ENSG00000139182_CLSTN3,107;ENSG00000256967_AC018653.3,498	ENSG00000139182_CLSTN3,107;ENSG00000256967_AC018653.3,498			0.00363772	0.208274	Diagnosis	Immature
chr12:7995002-7995934					0.00655492	0.235673	Diagnosis	Immature
chr12:8045662-8046530		ENSG00000065970_FOXJ2,12946			0.0010798	0.17692	Diagnosis	Immature
chr12:12520746-12521643		ENSG00000111266_DUSP16,41220			0.00800864	0.243514	Diagnosis	Immature
chr12:12562375-12563270	ENSG00000111266_DUSP16,0	ENSG00000111266_DUSP16,0			0.00121524	0.179147	Diagnosis	Immature
chr12:12611464-12612357	ENSG00000111269_CREBL2,0	ENSG00000111269_CREBL2,0			0.00174725	0.184273	Diagnosis	Immature
chr12:12786633-12787494		ENSG00000178878_APOLD1,60716			0.00528184	0.223054	Diagnosis	Immature
chr12:12899452-12900363		ENSG00000013588_GPRC5A,8670			0.00139306	0.182371	Diagnosis	Immature
chr12:12946616-12947528		ENSG00000111291_GPRC5D,4619;ENSG00000247498_GPRC5D-AS1,18890			0.00712753	0.238725	Diagnosis	Immature
chr12:14365225-14366092	ENSG00000171681_ATF7IP,0	ENSG00000171681_ATF7IP,0			0.00104496	0.176647	Diagnosis	Immature
chr12:14723570-14724429		ENSG00000214772_AC010168.1,57915			0.00733152	0.239832	Diagnosis	Immature
chr12:19439137-19440007		ENSG00000139154_AEBP2,35092			0.00456712	0.216559	Diagnosis	Immature
chr12:21657399-21658227		ENSG00000111716_LDHB,99630			0.00400866	0.211609	Diagnosis	Immature
chr12:26113974-26114898					0.000949959	0.176326	Diagnosis	Immature
chr12:26124566-26125466	ENSG00000123095_BHLHE41,0;ENSG00000256894_AC022509.3,1151	ENSG00000123095_BHLHE41,0;ENSG00000256894_AC022509.3,1151;ENSG00000123096_SSPN,2575			0.00773361	0.241215	Diagnosis	Immature
chr12:26937846-26938746	ENSG00000064102_INTS13,0;ENSG00000111790_FGFR1OP2,0	ENSG00000064102_INTS13,0;ENSG00000111790_FGFR1OP2,0			0.00282003	0.196728	Diagnosis	Immature
chr12:27013926-27014789	ENSG00000064115_TM7SF3,0	ENSG00000064115_TM7SF3,0			0.0072073	0.239479	Diagnosis	Immature
chr12:29380732-29381588	ENSG00000087502_ERGIC2,0	ENSG00000087502_ERGIC2,0			0.00292301	0.198436	Diagnosis	Immature
chr12:30695463-30696307	ENSG00000133704_IPO8,0;ENSG00000285870_AC012673.1,0	ENSG00000133704_IPO8,0;ENSG00000285870_AC012673.1,0			0.00529885	0.223259	Diagnosis	Immature
chr12:31590637-31591510	ENSG00000170456_DENND5B,0;ENSG00000255867_DENND5B-AS1,714	ENSG00000170456_DENND5B,0;ENSG00000255867_DENND5B-AS1,714			0.000172299	0.171004	Diagnosis	Immature
chr12:31658890-31659773		ENSG00000139160_ETFBKMT,11730			0.000607538	0.171004	Diagnosis	Immature
chr12:32106329-32107250	ENSG00000277342_AC048344.4,-1826;ENSG00000151746_BICD1,0;ENSG00000257530_AC048344.1,278	ENSG00000151746_BICD1,0;ENSG00000257530_AC048344.1,278			0.0013227	0.181124	Diagnosis	Immature
chr12:39442889-39443781	ENSG00000139116_KIF21A,0	ENSG00000139116_KIF21A,0			0.000316378	0.171004	Diagnosis	Immature
chr12:45727194-45727967	ENSG00000189079_ARID2,-1739;ENSG00000273015_AC008124.1,0	ENSG00000273015_AC008124.1,0			0.00254055	0.195097	Diagnosis	Immature
chr12:45990259-45991083	ENSG00000139218_SCAF11,1037	ENSG00000139218_SCAF11,1037			0.00604439	0.230409	Diagnosis	Immature
chr12:46152129-46153013					0.0063806	0.234058	Diagnosis	Immature
chr12:47772946-47773712	ENSG00000079337_RAPGEF3,-1906	ENSG00000211584_SLC48A1,19030			0.0036302	0.208274	Diagnosis	Immature
chr12:48681841-48682712	ENSG00000139620_KANSL2,0	ENSG00000139620_KANSL2,0			0.00665448	0.235825	Diagnosis	Immature
chr12:48890601-48891422					0.00235031	0.193625	Diagnosis	Immature
chr12:49060365-49061218	ENSG00000167548_KMT2D,-591				0.00508691	0.221693	Diagnosis	Immature
chr12:49110430-49111318	ENSG00000139636_LMBR1L,0	ENSG00000139636_LMBR1L,0			0.00705504	0.238159	Diagnosis	Immature
chr12:49129935-49130731	ENSG00000123416_TUBA1B,666	ENSG00000123416_TUBA1B,666;ENSG00000258017_AC011603.2,2153			0.0051687	0.222101	Diagnosis	Immature
chr12:49186919-49187746	ENSG00000167553_TUBA1C,-990;ENSG00000167552_TUBA1A,1334	ENSG00000167552_TUBA1A,1334;ENSG00000258017_AC011603.2,59137			0.00788832	0.242596	Diagnosis	Immature
chr12:49214701-49215568		ENSG00000167553_TUBA1C,25965			0.00860101	0.245885	Diagnosis	Immature
chr12:49347407-49348304	ENSG00000178401_DNAJC22,519	ENSG00000178401_DNAJC22,519			0.00662575	0.235689	Diagnosis	Immature
chr12:49622965-49623890		ENSG00000110844_PRPF40B,54747			0.00127681	0.180403	Diagnosis	Immature
chr12:49741058-49741905		ENSG00000139644_TMBIM6,33333			0.00366151	0.208973	Diagnosis	Immature
chr12:49902446-49903185	ENSG00000135472_FAIM2,1032	ENSG00000135472_FAIM2,1032;ENSG00000257771_LINC02395,2135			0.00511512	0.221829	Diagnosis	Immature
chr12:49903585-49904500	ENSG00000135472_FAIM2,0	ENSG00000135472_FAIM2,0;ENSG00000257771_LINC02395,3274			0.00220321	0.191381	Diagnosis	Immature
chr12:49968844-49969708	ENSG00000086159_AQP6,1650	ENSG00000086159_AQP6,1650			0.00607487	0.230966	Diagnosis	Immature
chr12:50025095-50026010		ENSG00000161800_RACGAP1,7126			0.00453322	0.215807	Diagnosis	Immature
chr12:50111493-50112398	ENSG00000178449_COX14,0;ENSG00000272368_AC074032.1,0	ENSG00000178449_COX14,0;ENSG00000272368_AC074032.1,0			0.00762075	0.240176	Diagnosis	Immature
chr12:50167022-50167915	ENSG00000139624_CERS5,0	ENSG00000139624_CERS5,0			0.0017433	0.184273	Diagnosis	Immature
chr12:50400497-50401372		ENSG00000161813_LARP4,8114			0.00131157	0.181017	Diagnosis	Immature
chr12:50763757-50764355	ENSG00000123268_ATF1,47	ENSG00000123268_ATF1,47			0.00836975	0.244285	Diagnosis	Immature
chr12:51424449-51425329	ENSG00000271065_AC107031.1,0	ENSG00000271065_AC107031.1,0;ENSG00000050438_SLC4A8,33132			0.000729227	0.171004	Diagnosis	Immature
chr12:51863860-51864790					0.00509521	0.221725	Diagnosis	Immature
chr12:52006545-52007322	ENSG00000161835_GRASP,0	ENSG00000161835_GRASP,0			0.0034353	0.205167	Diagnosis	Immature
chr12:52050810-52051679		ENSG00000123358_NR4A1,27978			0.002402	0.193625	Diagnosis	Immature
chr12:52061588-52062398					0.00700088	0.237986	Diagnosis	Immature
chr12:52069317-52070231	ENSG00000123395_ATG101,71	ENSG00000123395_ATG101,71			0.00816283	0.243709	Diagnosis	Immature
chr12:52308139-52309036	ENSG00000287051_AC121757.2,-1852;ENSG00000257829_AC121757.1,0	ENSG00000257829_AC121757.1,0;ENSG00000170442_KRT86,58839			0.00732254	0.239831	Diagnosis	Immature
chr12:53299332-53300220	ENSG00000139637_C12orf10,0;ENSG00000257605_AC073611.1,94	ENSG00000139637_C12orf10,0;ENSG00000257605_AC073611.1,94;ENSG00000123349_PFDN5,4041			0.00703014	0.238109	Diagnosis	Immature
chr12:53321075-53321978		ENSG00000094914_AAAS,2886			0.000886135	0.174388	Diagnosis	Immature
chr12:53344671-53345576	ENSG00000170374_SP7,0	ENSG00000170374_SP7,0			0.00342417	0.205115	Diagnosis	Immature
chr12:53379489-53380340	ENSG00000185591_SP1,0	ENSG00000185591_SP1,0			0.00727261	0.239479	Diagnosis	Immature
chr12:53451657-53452382	ENSG00000197111_PCBP2,0	ENSG00000197111_PCBP2,0			0.000748612	0.172121	Diagnosis	Immature
chr12:53492693-53493606		ENSG00000139625_MAP3K12,6457			0.00780622	0.24192	Diagnosis	Immature
chr12:53625774-53626658	ENSG00000170653_ATF7,0	ENSG00000170653_ATF7,0			0.00262305	0.1959	Diagnosis	Immature
chr12:53675745-53676639	ENSG00000135390_ATP5MC2,769	ENSG00000135390_ATP5MC2,769			0.00408782	0.21197	Diagnosis	Immature
chr12:54214458-54215367					0.00771083	0.241215	Diagnosis	Immature
chr12:54217659-54218471					0.00612993	0.23142	Diagnosis	Immature
chr12:54279434-54280177	ENSG00000135486_HNRNPA1,-16;ENSG00000094916_CBX5,0	ENSG00000094916_CBX5,0;ENSG00000258344_AC078778.1,2803			0.00538036	0.223983	Diagnosis	Immature
chr12:54358843-54359748		ENSG00000258086_AC079313.1,5051;ENSG00000258137_AC079313.2,5182			0.00615992	0.231554	Diagnosis	Immature
chr12:54988178-54989077					0.00694669	0.237705	Diagnosis	Immature
chr12:55037157-55038057					0.00504335	0.221192	Diagnosis	Immature
chr12:55715767-55716711	ENSG00000135441_BLOC1S1,0;ENSG00000135424_ITGA7,0	ENSG00000135424_ITGA7,0;ENSG00000135441_BLOC1S1,0			0.00403358	0.211609	Diagnosis	Immature
chr12:55829285-55830163	ENSG00000135392_DNAJC14,661	ENSG00000135392_DNAJC14,661			0.00375053	0.209409	Diagnosis	Immature
chr12:56041452-56042320	ENSG00000257449_AC034102.3,0;ENSG00000197728_RPS26,101	ENSG00000257449_AC034102.3,0;ENSG00000197728_RPS26,101			0.00101265	0.176647	Diagnosis	Immature
chr12:56082724-56083626		ENSG00000065361_ERBB3,5925			0.00241403	0.193625	Diagnosis	Immature
chr12:56117811-56118700	ENSG00000139641_ESYT1,0;ENSG00000135482_ZC3H10,0;ENSG00000229117_RPL41,1221;ENSG00000258345_AC034102.7,1239	ENSG00000139641_ESYT1,0;ENSG00000135482_ZC3H10,0;ENSG00000229117_RPL41,1221			0.0011397	0.177242	Diagnosis	Immature
chr12:56190130-56190654	ENSG00000139613_SMARCC2,-563;ENSG00000258199_AC073896.4,0	ENSG00000258199_AC073896.4,0			0.00823387	0.243928	Diagnosis	Immature
chr12:56333589-56334493	ENSG00000135473_PAN2,0;ENSG00000110944_IL23A,0	ENSG00000135473_PAN2,0;ENSG00000110944_IL23A,0			0.00236632	0.193625	Diagnosis	Immature
chr12:56359842-56360763	ENSG00000170581_STAT2,0	ENSG00000170581_STAT2,0;ENSG00000175336_APOF,2094			0.00809769	0.243514	Diagnosis	Immature
chr12:56468107-56468985	ENSG00000176422_SPRYD4,0;ENSG00000135517_MIP,181	ENSG00000176422_SPRYD4,0;ENSG00000135517_MIP,181			0.00431375	0.212666	Diagnosis	Immature
chr12:56636532-56637191	ENSG00000076108_BAZ2A,0	ENSG00000076108_BAZ2A,0			0.00322815	0.202248	Diagnosis	Immature
chr12:56645651-56646569	ENSG00000110955_ATP5F1B,0	ENSG00000110955_ATP5F1B,0			0.00261138	0.1959	Diagnosis	Immature
chr12:56687917-56688829	ENSG00000110958_PTGES3,0	ENSG00000110958_PTGES3,0			0.000723089	0.171004	Diagnosis	Immature
chr12:57238799-57239682	ENSG00000185633_NDUFA4L2,1033	ENSG00000185633_NDUFA4L2,1033			0.00344001	0.205167	Diagnosis	Immature
chr12:57546764-57547643	ENSG00000175203_DCTN2,0	ENSG00000175203_DCTN2,0			0.00424978	0.212613	Diagnosis	Immature
chr12:57590803-57591635	ENSG00000166908_PIP4K2C,0	ENSG00000166908_PIP4K2C,0			0.00688297	0.237552	Diagnosis	Immature
chr12:62259762-62260681	ENSG00000135655_USP15,0	ENSG00000135655_USP15,0;ENSG00000198673_TAFA2,18469			0.00538949	0.224103	Diagnosis	Immature
chr12:62602825-62603669	ENSG00000275180_AC048341.2,-240;ENSG00000221949_LINC01465,21;ENSG00000257354_AC048341.1,73	ENSG00000221949_LINC01465,21;ENSG00000257354_AC048341.1,73			0.000853592	0.174388	Diagnosis	Immature
chr12:63668144-63669076	ENSG00000177990_DPY19L2,0	ENSG00000177990_DPY19L2,0;ENSG00000249753_AC084357.2,126642			0.00694303	0.237705	Diagnosis	Immature
chr12:63843540-63844405	ENSG00000196935_SRGAP1,-295				0.00809249	0.243514	Diagnosis	Immature
chr12:64403989-64404833	ENSG00000184575_XPOT,0	ENSG00000184575_XPOT,0			0.000383669	0.171004	Diagnosis	Immature
chr12:64451723-64452634	ENSG00000183735_TBK1,0;ENSG00000277895_AC135279.4,267	ENSG00000183735_TBK1,0;ENSG00000277895_AC135279.4,267			0.00398056	0.211609	Diagnosis	Immature
chr12:64587441-64588316		ENSG00000153179_RASSF3,80440			0.0016087	0.182886	Diagnosis	Immature
chr12:64945967-64946904		ENSG00000248995_LINC02231,35620;ENSG00000255693_LINC02389,62573			0.00851735	0.244984	Diagnosis	Immature
chr12:65169234-65170033	ENSG00000276853_AC026124.2,-1229;ENSG00000174106_LEMD3,0	ENSG00000174106_LEMD3,0			0.00766261	0.240734	Diagnosis	Immature
chr12:67268824-67269627	ENSG00000111530_CAND1,0	ENSG00000111530_CAND1,0			0.00152848	0.182746	Diagnosis	Immature
chr12:68686539-68687433	ENSG00000111581_NUP107,0;ENSG00000247363_AC090061.1,322	ENSG00000111581_NUP107,0;ENSG00000247363_AC090061.1,322			0.00840694	0.244479	Diagnosis	Immature
chr12:68745767-68746602	ENSG00000175782_SLC35E3,0	ENSG00000175782_SLC35E3,0;ENSG00000111581_NUP107,58816			0.0015954	0.182746	Diagnosis	Immature
chr12:69585085-69585959	ENSG00000166226_CCT2,0	ENSG00000166226_CCT2,0			0.00182982	0.184273	Diagnosis	Immature
chr12:70243002-70243847	ENSG00000257815_AC025159.1,0;ENSG00000111596_CNOT2,8	ENSG00000257815_AC025159.1,0;ENSG00000111596_CNOT2,8			0.0040233	0.211609	Diagnosis	Immature
chr12:70557481-70558392		ENSG00000127329_PTPRB,79048			0.00363801	0.208274	Diagnosis	Immature
chr12:72716705-72717392					0.00763728	0.240223	Diagnosis	Immature
chr12:75390679-75391574	ENSG00000180881_CAPS2,0;ENSG00000180481_GLIPR1L2,0	ENSG00000180881_CAPS2,0;ENSG00000180481_GLIPR1L2,0			0.000563683	0.171004	Diagnosis	Immature
chr12:76347995-76348904	ENSG00000179941_BBS10,0	ENSG00000179941_BBS10,0			0.00149859	0.182371	Diagnosis	Immature
chr12:76763736-76764630	ENSG00000186908_ZDHHC17,148	ENSG00000186908_ZDHHC17,148			0.00830209	0.244261	Diagnosis	Immature
chr12:81626094-81626906		ENSG00000139220_PPFIA2,132647			0.00325405	0.202356	Diagnosis	Immature
chr12:88141700-88142635	ENSG00000198707_CEP290,0;ENSG00000139324_TMTC3,0	ENSG00000198707_CEP290,0;ENSG00000139324_TMTC3,0			0.000169303	0.171004	Diagnosis	Immature
chr12:89709157-89709925	ENSG00000070961_ATP2B1,0;ENSG00000271614_ATP2B1-AS1,198	ENSG00000070961_ATP2B1,0;ENSG00000271614_ATP2B1-AS1,198			0.000116486	0.171004	Diagnosis	Immature
chr12:91404243-91405122					0.0062682	0.232881	Diagnosis	Immature
chr12:92145574-92146488	ENSG00000133639_BTG1,0;ENSG00000245904_AC025164.1,1	ENSG00000133639_BTG1,0;ENSG00000245904_AC025164.1,1			0.000779706	0.174388	Diagnosis	Immature
chr12:92928941-92929790	ENSG00000102189_EEA1,0	ENSG00000102189_EEA1,0			0.00189145	0.184273	Diagnosis	Immature
chr12:93377393-93378255	ENSG00000257252_AC124947.1,0;ENSG00000173598_NUDT4,0	ENSG00000257252_AC124947.1,0;ENSG00000173598_NUDT4,0			0.00306373	0.2	Diagnosis	Immature
chr12:93441634-93442534	ENSG00000177889_UBE2N,0	ENSG00000177889_UBE2N,0			0.00603748	0.230409	Diagnosis	Immature
chr12:93570522-93571315	ENSG00000246985_SOCS2-AS1,453;ENSG00000120833_SOCS2,708	ENSG00000246985_SOCS2-AS1,453;ENSG00000120833_SOCS2,708			0.00555443	0.224869	Diagnosis	Immature
chr12:93677062-93677902	ENSG00000169372_CRADD,0	ENSG00000169372_CRADD,0			0.00202375	0.187461	Diagnosis	Immature
chr12:94102021-94102780					0.00633011	0.233135	Diagnosis	Immature
chr12:94753087-94753990					0.0058844	0.229398	Diagnosis	Immature
chr12:95073083-95073853	ENSG00000120798_NR2C1,0	ENSG00000120798_NR2C1,0			0.00531645	0.223458	Diagnosis	Immature
chr12:95548338-95549169		ENSG00000136014_USP44,2307			0.00720389	0.239479	Diagnosis	Immature
chr12:98503318-98503926	ENSG00000245017_LINC02453,0	ENSG00000245017_LINC02453,0			0.0030825	0.200127	Diagnosis	Immature
chr12:98593209-98594086	ENSG00000075415_SLC25A3,0	ENSG00000075415_SLC25A3,0			0.000175437	0.171004	Diagnosis	Immature
chr12:98894552-98895427		ENSG00000185046_ANKS1B,1089227			0.000995243	0.176418	Diagnosis	Immature
chr12:99984378-99985264	ENSG00000185046_ANKS1B,0;ENSG00000287675_AC078916.1,0	ENSG00000185046_ANKS1B,0;ENSG00000287675_AC078916.1,0			0.00721381	0.239479	Diagnosis	Immature
chr12:100821790-100822737		ENSG00000151572_ANO4,104264			0.00508845	0.221693	Diagnosis	Immature
chr12:102958160-102958905	ENSG00000171759_PAH,0;ENSG00000139352_ASCL1,486	ENSG00000171759_PAH,0;ENSG00000139352_ASCL1,486			0.00646232	0.234638	Diagnosis	Immature
chr12:104137758-104138623	ENSG00000120837_NFYB,0	ENSG00000120837_NFYB,0			0.000275119	0.171004	Diagnosis	Immature
chr12:104286580-104287490		ENSG00000198431_TXNRD1,70801			0.00547885	0.224691	Diagnosis	Immature
chr12:105235659-105236557	ENSG00000136044_APPL2,0;ENSG00000286903_AC078874.1,0;ENSG00000235162_C12orf75,369	ENSG00000136044_APPL2,0;ENSG00000286903_AC078874.1,0;ENSG00000235162_C12orf75,369			0.00880311	0.248024	Diagnosis	Immature
chr12:106247739-106248619	ENSG00000258355_AC079174.1,-783	ENSG00000136026_CKAP4,55660			0.00761153	0.240176	Diagnosis	Immature
chr12:106284281-106285156		ENSG00000136026_CKAP4,19123			0.00699105	0.237986	Diagnosis	Immature
chr12:107093274-107094187	ENSG00000257548_AC078929.1,0;ENSG00000008405_CRY1,0	ENSG00000008405_CRY1,0;ENSG00000257548_AC078929.1,0			0.00549661	0.224691	Diagnosis	Immature
chr12:107340628-107341503		ENSG00000151136_BTBD11,22207			0.00627773	0.232881	Diagnosis	Immature
chr12:108371663-108372550					0.00855198	0.245323	Diagnosis	Immature
chr12:108562121-108563004	ENSG00000075856_SART3,-721;ENSG00000136003_ISCU,0	ENSG00000136003_ISCU,0			0.000364644	0.171004	Diagnosis	Immature
chr12:108857243-108858124	ENSG00000110887_DAO,-808;ENSG00000084112_SSH1,0	ENSG00000084112_SSH1,0			0.00172905	0.184273	Diagnosis	Immature
chr12:109097688-109098574	ENSG00000076248_UNG,114	ENSG00000076248_UNG,114			0.00554183	0.224768	Diagnosis	Immature
chr12:109624861-109625666					0.00886206	0.248675	Diagnosis	Immature
chr12:109713293-109714174	ENSG00000139438_FAM222A,-54				0.00336247	0.205115	Diagnosis	Immature
chr12:110073159-110074029	ENSG00000174456_C12orf76,0	ENSG00000174456_C12orf76,0			0.00375288	0.209409	Diagnosis	Immature
chr12:110449907-110450762	ENSG00000111229_ARPC3,0	ENSG00000111229_ARPC3,0			0.0058711	0.229278	Diagnosis	Immature
chr12:111368664-111369539	ENSG00000198324_PHETA1,0;ENSG00000257595_LINC02356,0	ENSG00000198324_PHETA1,0;ENSG00000257595_LINC02356,0			0.00426047	0.212613	Diagnosis	Immature
chr12:111405282-111406200	ENSG00000111252_SH2B3,0	ENSG00000111252_SH2B3,0			0.000257926	0.171004	Diagnosis	Immature
chr12:111685552-111686462	ENSG00000089234_BRAP,0;ENSG00000111271_ACAD10,0	ENSG00000089234_BRAP,0;ENSG00000111271_ACAD10,0			0.00750067	0.240176	Diagnosis	Immature
chr12:113097646-113098246		ENSG00000135144_DTX1,40937			0.00467346	0.21766	Diagnosis	Immature
chr12:113965964-113966873	ENSG00000122965_RBM19,0	ENSG00000122965_RBM19,0			0.00168651	0.184273	Diagnosis	Immature
chr12:114186340-114187235					0.003046	0.199862	Diagnosis	Immature
chr12:116277311-116278144	ENSG00000123066_MED13L,0	ENSG00000123066_MED13L,0			0.000648159	0.171004	Diagnosis	Immature
chr12:116819071-116819951		ENSG00000135119_RNFT2,80893			0.00352608	0.206832	Diagnosis	Immature
chr12:117334994-117335897		ENSG00000089250_NOS1,116273			0.00451512	0.215387	Diagnosis	Immature
chr12:117875706-117876610		ENSG00000171435_KSR2,92380			0.0084053	0.244479	Diagnosis	Immature
chr12:118189739-118190410		ENSG00000135090_TAOK3,182497			0.00801127	0.243514	Diagnosis	Immature
chr12:118299848-118300680		ENSG00000135090_TAOK3,72227			0.00123391	0.179147	Diagnosis	Immature
chr12:118372547-118373459	ENSG00000135090_TAOK3,0	ENSG00000135090_TAOK3,0			0.000861766	0.174388	Diagnosis	Immature
chr12:118375973-118376863	ENSG00000270482_AC026367.1,0;ENSG00000111707_SUDS3,0	ENSG00000270482_AC026367.1,0;ENSG00000111707_SUDS3,0			0.00132543	0.181124	Diagnosis	Immature
chr12:119749491-119750316		ENSG00000122966_CIT,127004			0.00275702	0.196728	Diagnosis	Immature
chr12:120086741-120087643		ENSG00000135127_BICDL1,96872			0.00867625	0.246892	Diagnosis	Immature
chr12:120200803-120201701	ENSG00000089157_RPLP0,0;ENSG00000255857_PXN-AS1,0	ENSG00000089157_RPLP0,0;ENSG00000255857_PXN-AS1,0			0.000351762	0.171004	Diagnosis	Immature
chr12:120291539-120292426					0.00133918	0.181162	Diagnosis	Immature
chr12:120445994-120446924	ENSG00000170855_TRIAP1,0;ENSG00000257218_GATC,0	ENSG00000170855_TRIAP1,0;ENSG00000257218_GATC,0			0.00572711	0.227073	Diagnosis	Immature
chr12:120513771-120514674		ENSG00000110871_COQ5,19760			0.00853807	0.245274	Diagnosis	Immature
chr12:120528669-120529585		ENSG00000110871_COQ5,4849			0.0029271	0.198592	Diagnosis	Immature
chr12:120686318-120687206	ENSG00000110917_MLEC,0	ENSG00000110917_MLEC,0			0.00607985	0.230991	Diagnosis	Immature
chr12:120903886-120904777	ENSG00000157837_SPPL3,0;ENSG00000286493_AC069214.1,0	ENSG00000157837_SPPL3,0;ENSG00000286493_AC069214.1,0			0.00261963	0.1959	Diagnosis	Immature
chr12:121132494-121133342	ENSG00000089041_P2RX7,0	ENSG00000089041_P2RX7,0			0.0070283	0.238109	Diagnosis	Immature
chr12:121351997-121352917		ENSG00000089053_ANAPC5,46979			0.000587626	0.171004	Diagnosis	Immature
chr12:121466998-121467910		ENSG00000089094_KDM2B,113113			0.00529488	0.223195	Diagnosis	Immature
chr12:121712269-121713175	ENSG00000188735_TMEM120B,0	ENSG00000188735_TMEM120B,0			0.00300131	0.199738	Diagnosis	Immature
chr12:121793947-121794742		ENSG00000139725_RHOF,8661			0.00468934	0.218063	Diagnosis	Immature
chr12:121918081-121919011	ENSG00000158023_WDR66,0	ENSG00000158023_WDR66,0;ENSG00000110801_PSMD9,29349			0.00381705	0.20987	Diagnosis	Immature
chr12:122225752-122226671	ENSG00000184047_DIABLO,785;ENSG00000284934_AC048338.2,863	ENSG00000184047_DIABLO,785;ENSG00000284934_AC048338.2,863			0.00350738	0.206832	Diagnosis	Immature
chr12:122526569-122527475	ENSG00000111011_RSRC2,0;ENSG00000184445_KNTC1,0	ENSG00000111011_RSRC2,0;ENSG00000184445_KNTC1,0			0.00367783	0.209039	Diagnosis	Immature
chr12:122835051-122835898	ENSG00000130787_HIP1R,598	ENSG00000130787_HIP1R,598			0.00552907	0.224691	Diagnosis	Immature
chr12:122966066-122966930		ENSG00000150967_ABCB9,14719			0.0033399	0.204912	Diagnosis	Immature
chr12:123232646-123233574	ENSG00000130921_C12orf65,0	ENSG00000130921_C12orf65,0;ENSG00000051825_MPHOSPH9,10440			0.00569826	0.226687	Diagnosis	Immature
chr12:123270884-123271632	ENSG00000111328_CDK2AP1,702	ENSG00000111328_CDK2AP1,702			0.00757974	0.240176	Diagnosis	Immature
chr12:123388418-123389326		ENSG00000183955_KMT5A,4645			0.00266783	0.196147	Diagnosis	Immature
chr12:123479226-123480001		ENSG00000188026_RILPL1,53718			0.00341448	0.205115	Diagnosis	Immature
chr12:123601568-123602496	ENSG00000111364_DDX55,0	ENSG00000111364_DDX55,0			0.00886743	0.248711	Diagnosis	Immature
chr12:123711849-123712765	ENSG00000185344_ATP6V0A2,0	ENSG00000185344_ATP6V0A2,0			0.00446698	0.21447	Diagnosis	Immature
chr12:124369299-124370175		ENSG00000196498_NCOR2,197414			0.00614374	0.23142	Diagnosis	Immature
chr12:124916997-124917874	ENSG00000150991_UBC,0	ENSG00000150991_UBC,0			0.00112131	0.17692	Diagnosis	Immature
chr12:124927434-124928196					0.00457635	0.216661	Diagnosis	Immature
chr12:125049243-125050159					0.00127104	0.180403	Diagnosis	Immature
chr12:125079683-125080525		ENSG00000081760_AACS,14249			0.00870429	0.24693	Diagnosis	Immature
chr12:128381333-128382192		ENSG00000181234_TMEM132C,113930			0.00865106	0.246365	Diagnosis	Immature
chr12:130053522-130054370					0.00760926	0.240176	Diagnosis	Immature
chr12:130871580-130872429	ENSG00000132341_RAN,0	ENSG00000132341_RAN,0			0.00784555	0.24232	Diagnosis	Immature
chr12:131710494-131711384	ENSG00000061936_SFSWAP,0	ENSG00000061936_SFSWAP,0			0.00677994	0.237192	Diagnosis	Immature
chr12:131895917-131896690	ENSG00000177169_ULK1,1295	ENSG00000177169_ULK1,1295			0.00624807	0.23263	Diagnosis	Immature
chr12:132710275-132711203	ENSG00000247077_PGAM5,0	ENSG00000247077_PGAM5,0			0.0081046	0.243514	Diagnosis	Immature
chr12:132761602-132762478	ENSG00000176915_ANKLE2,0	ENSG00000176915_ANKLE2,0			0.000819418	0.174388	Diagnosis	Immature
chr12:132887232-132888161	ENSG00000236617_AC127070.1,0	ENSG00000236617_AC127070.1,0;ENSG00000072609_CHFR,68143			0.00237575	0.193625	Diagnosis	Immature
chr12:133037016-133037963	ENSG00000246394_ZNF84-DT,0;ENSG00000198040_ZNF84,0	ENSG00000246394_ZNF84-DT,0;ENSG00000198040_ZNF84,0			0.00324605	0.202248	Diagnosis	Immature
chr12:133080194-133080945	ENSG00000196387_ZNF140,356	ENSG00000196387_ZNF140,356			0.00119081	0.177939	Diagnosis	Immature
chr13:18211638-18212519		ENSG00000279516_FAM230C,16341			0.00026492	0.171004	Diagnosis	Immature
chr13:18212830-18213562		ENSG00000279516_FAM230C,17533			0.00208765	0.1888	Diagnosis	Immature
chr13:19782513-19783268	ENSG00000121390_PSPC1,0	ENSG00000121390_PSPC1,0			0.00338947	0.205115	Diagnosis	Immature
chr13:19863273-19864187	ENSG00000132950_ZMYM5,0;ENSG00000275964_AL355001.2,0	ENSG00000132950_ZMYM5,0;ENSG00000275964_AL355001.2,0			5.97032e-05	0.171004	Diagnosis	Immature
chr13:19958185-19959090	ENSG00000121741_ZMYM2,0	ENSG00000121741_ZMYM2,0			0.00356514	0.207552	Diagnosis	Immature
chr13:20566662-20567597	ENSG00000277020_AL590096.1,0;ENSG00000032742_IFT88,0	ENSG00000277020_AL590096.1,0;ENSG00000032742_IFT88,0			0.00138128	0.182371	Diagnosis	Immature
chr13:21140003-21140926	ENSG00000150459_SAP18,0	ENSG00000150459_SAP18,0			0.00173755	0.184273	Diagnosis	Immature
chr13:21176209-21177128	ENSG00000165480_SKA3,0;ENSG00000173141_MRPL57,0	ENSG00000165480_SKA3,0;ENSG00000173141_MRPL57,0			0.00197477	0.186248	Diagnosis	Immature
chr13:23888947-23889825	ENSG00000027001_MIPEP,0;ENSG00000205861_PCOTH,105	ENSG00000027001_MIPEP,0;ENSG00000205861_PCOTH,105			0.00249087	0.193923	Diagnosis	Immature
chr13:23953809-23954674	ENSG00000287530_AL445985.2,0	ENSG00000287530_AL445985.2,0			0.0015692	0.182746	Diagnosis	Immature
chr13:25192635-25193423		ENSG00000225105_LINC01076,16872			0.00639984	0.234058	Diagnosis	Immature
chr13:25286984-25287844	ENSG00000139505_MTMR6,165	ENSG00000139505_MTMR6,165			0.00152888	0.182746	Diagnosis	Immature
chr13:25301131-25302025	ENSG00000260509_AL590787.1,0;ENSG00000139496_NUP58,0	ENSG00000260509_AL590787.1,0;ENSG00000139496_NUP58,0			0.00684404	0.237552	Diagnosis	Immature
chr13:26253681-26254537	ENSG00000132964_CDK8,0	ENSG00000132964_CDK8,0			0.000725088	0.171004	Diagnosis	Immature
chr13:27251038-27251946	ENSG00000234772_LINC00412,-327;ENSG00000275294_LINC02340,0;ENSG00000122026_RPL21,0	ENSG00000275294_LINC02340,0;ENSG00000122026_RPL21,0			0.00288295	0.197162	Diagnosis	Immature
chr13:27620169-27621008	ENSG00000139517_LNX2,0;ENSG00000186184_POLR1D,0	ENSG00000139517_LNX2,0;ENSG00000186184_POLR1D,0			0.00442029	0.213543	Diagnosis	Immature
chr13:28137909-28138694	ENSG00000261485_PAN3-AS1,0;ENSG00000152520_PAN3,0	ENSG00000261485_PAN3-AS1,0;ENSG00000152520_PAN3,0			0.00711483	0.238659	Diagnosis	Immature
chr13:28718549-28719431	ENSG00000139508_SLC46A3,0	ENSG00000139508_SLC46A3,0			0.00495122	0.220578	Diagnosis	Immature
chr13:30465564-30466464	ENSG00000285840_AL353648.1,0	ENSG00000285840_AL353648.1,0;ENSG00000189403_HMGB1,151133			0.00065379	0.171004	Diagnosis	Immature
chr13:30617249-30618111	ENSG00000189403_HMGB1,0;ENSG00000132952_USPL1,0	ENSG00000189403_HMGB1,0;ENSG00000132952_USPL1,0			0.00748961	0.240176	Diagnosis	Immature
chr13:31161699-31162644	ENSG00000120694_HSPH1,0	ENSG00000120694_HSPH1,0			0.00267007	0.196147	Diagnosis	Immature
chr13:31199754-31200585	ENSG00000187676_B3GLCT,0	ENSG00000187676_B3GLCT,0			0.0014157	0.182371	Diagnosis	Immature
chr13:32585986-32586771	ENSG00000083642_PDS5B,0	ENSG00000083642_PDS5B,0			0.0011264	0.17692	Diagnosis	Immature
chr13:33542272-33543187		ENSG00000230490_AL139383.1,133609			0.000211895	0.171004	Diagnosis	Immature
chr13:36346122-36347028	ENSG00000120664_SPART-AS1,0	ENSG00000120664_SPART-AS1,0;ENSG00000133104_SPART,23152			0.00212624	0.190152	Diagnosis	Immature
chr13:38349290-38350181	ENSG00000120686_UFM1,0;ENSG00000223685_LINC00571,78	ENSG00000120686_UFM1,0;ENSG00000223685_LINC00571,78			0.00374302	0.209409	Diagnosis	Immature
chr13:40666261-40667155	ENSG00000150907_FOXO1,0	ENSG00000150907_FOXO1,0			0.000680812	0.171004	Diagnosis	Immature
chr13:40921273-40922165					0.00169921	0.184273	Diagnosis	Immature
chr13:41059969-41060771	ENSG00000120688_WBP4,-738;ENSG00000120690_ELF1,669	ENSG00000120690_ELF1,669			0.00348612	0.206167	Diagnosis	Immature
chr13:41132327-41133217	ENSG00000165572_KBTBD6,0;ENSG00000278390_AL354696.2,0	ENSG00000165572_KBTBD6,0;ENSG00000278390_AL354696.2,0			0.000506932	0.171004	Diagnosis	Immature
chr13:41194054-41194960	ENSG00000120696_KBTBD7,0	ENSG00000120696_KBTBD7,0;ENSG00000278390_AL354696.2,61115			0.00175763	0.184273	Diagnosis	Immature
chr13:41561824-41562733					0.00628478	0.232935	Diagnosis	Immature
chr13:42048647-42049525		ENSG00000102780_DGKH,8611			0.00580849	0.228324	Diagnosis	Immature
chr13:42271410-42272344	ENSG00000023516_AKAP11,0	ENSG00000023516_AKAP11,0			0.000299671	0.171004	Diagnosis	Immature
chr13:43786630-43787526	ENSG00000270522_AL162713.1,-65;ENSG00000287029_AL162713.2,0;ENSG00000120658_ENOX1,0	ENSG00000120658_ENOX1,0;ENSG00000287029_AL162713.2,0			0.000933946	0.176098	Diagnosis	Immature
chr13:44141620-44142503		ENSG00000226519_LINC00390,5259;ENSG00000227258_SMIM2-AS1,31169			0.0081321	0.243514	Diagnosis	Immature
chr13:44436502-44437388		ENSG00000102804_TSC22D1,139759			0.00348327	0.206109	Diagnosis	Immature
chr13:44577056-44578015	ENSG00000102804_TSC22D1,0;ENSG00000278156_TSC22D1-AS1,1163	ENSG00000102804_TSC22D1,0;ENSG00000278156_TSC22D1-AS1,1163			0.00513906	0.221914	Diagnosis	Immature
chr13:44917737-44918620					0.00837961	0.244285	Diagnosis	Immature
chr13:46052264-46053127	ENSG00000235903_CPB2-AS1,0;ENSG00000123200_ZC3H13,0	ENSG00000123200_ZC3H13,0;ENSG00000235903_CPB2-AS1,0			0.0065834	0.235673	Diagnosis	Immature
chr13:48515513-48516391		ENSG00000136161_RCBTB2,16865;ENSG00000139687_RB1,211787			0.00406758	0.21197	Diagnosis	Immature
chr13:48532417-48533325	ENSG00000274929_AL157813.1,0;ENSG00000136161_RCBTB2,0;ENSG00000287599_AL157813.2,617	ENSG00000136161_RCBTB2,0;ENSG00000274929_AL157813.1,0;ENSG00000287599_AL157813.2,617;ENSG00000139687_RB1,228691			0.000355599	0.171004	Diagnosis	Immature
chr13:49792389-49793241	ENSG00000102753_KPNA3,0;ENSG00000276436_AL136301.1,0	ENSG00000102753_KPNA3,0;ENSG00000276436_AL136301.1,0			0.000296378	0.171004	Diagnosis	Immature
chr13:49935961-49936881	ENSG00000123178_SPRYD7,0	ENSG00000123178_SPRYD7,0			0.00837235	0.244285	Diagnosis	Immature
chr13:51246362-51247267		ENSG00000150510_FAM124A,24028			0.00282849	0.196728	Diagnosis	Immature
chr13:51452774-51453651	ENSG00000236778_INTS6-AS1,410;ENSG00000102786_INTS6,613	ENSG00000236778_INTS6-AS1,410;ENSG00000102786_INTS6,613			0.00282131	0.196728	Diagnosis	Immature
chr13:52011736-52012587	ENSG00000123191_ATP7B,0;ENSG00000253710_ALG11,0	ENSG00000123191_ATP7B,0;ENSG00000253710_ALG11,0			0.000114733	0.171004	Diagnosis	Immature
chr13:57633272-57634082	ENSG00000278722_AL445288.1,0;ENSG00000118946_PCDH17,1528	ENSG00000278722_AL445288.1,0;ENSG00000118946_PCDH17,1528			0.00747512	0.240176	Diagnosis	Immature
chr13:59452067-59453022					0.00320218	0.201981	Diagnosis	Immature
chr13:66886146-66886898		ENSG00000228842_PCDH9-AS2,60977;ENSG00000184226_PCDH9,343547			0.00825274	0.244097	Diagnosis	Immature
chr13:77026706-77027455	ENSG00000274898_AC001226.1,-489;ENSG00000236051_MYCBP2-AS1,0;ENSG00000005812_FBXL3,0	ENSG00000005812_FBXL3,0;ENSG00000236051_MYCBP2-AS1,0			0.000929057	0.176098	Diagnosis	Immature
chr13:77697170-77698055	ENSG00000139737_SLAIN1,0	ENSG00000139737_SLAIN1,0			0.00418788	0.212385	Diagnosis	Immature
chr13:79936100-79937027					0.00241553	0.193625	Diagnosis	Immature
chr13:80130995-80131829		ENSG00000285684_AL137781.1,2539			0.00546074	0.224691	Diagnosis	Immature
chr13:94549161-94550124					0.00836898	0.244285	Diagnosis	Immature
chr13:94601397-94602281	ENSG00000152749_GPR180,0	ENSG00000152749_GPR180,0			0.000661393	0.171004	Diagnosis	Immature
chr13:94947673-94948587					0.00647251	0.234846	Diagnosis	Immature
chr13:96052962-96053817	ENSG00000102595_UGGT2,0	ENSG00000102595_UGGT2,0			0.00533857	0.223491	Diagnosis	Immature
chr13:97221798-97222692	ENSG00000139793_MBNL2,364	ENSG00000139793_MBNL2,364			0.00274026	0.196728	Diagnosis	Immature
chr13:97432761-97433620	ENSG00000125249_RAP2A,-549;ENSG00000286416_AL442067.3,374	ENSG00000286416_AL442067.3,374			0.00170913	0.184273	Diagnosis	Immature
chr13:98142632-98143533	ENSG00000152767_FARP1,70	ENSG00000152767_FARP1,70			0.00764998	0.240418	Diagnosis	Immature
chr13:99498246-99499145	ENSG00000280710_AL139035.1,0;ENSG00000280734_LINC01232,161;ENSG00000203441_LINC00449,1907	ENSG00000280710_AL139035.1,0;ENSG00000280734_LINC01232,161;ENSG00000125304_TM9SF2,51935			0.0043299	0.21268	Diagnosis	Immature
chr13:99501013-99501898	ENSG00000280734_LINC01232,-1707;ENSG00000203441_LINC00449,0	ENSG00000203441_LINC00449,0;ENSG00000280710_AL139035.1,2276;ENSG00000125304_TM9SF2,54702			0.0072287	0.239479	Diagnosis	Immature
chr13:100088621-100089519	ENSG00000274605_PCCA-DT,0;ENSG00000175198_PCCA,0	ENSG00000274605_PCCA-DT,0;ENSG00000175198_PCCA,0			0.00234428	0.193625	Diagnosis	Immature
chr13:100530553-100531432		ENSG00000134864_GGACT,58096			0.00597041	0.230083	Diagnosis	Immature
chr13:100657700-100658611		ENSG00000125247_TMTC4,16482			0.00274298	0.196728	Diagnosis	Immature
chr13:101415857-101416744	ENSG00000102452_NALCN,0	ENSG00000102452_NALCN,0			0.00601832	0.230409	Diagnosis	Immature
chr13:102394105-102395035	ENSG00000243319_FGF14-IT1,0;ENSG00000272143_FGF14-AS2,0	ENSG00000243319_FGF14-IT1,0;ENSG00000272143_FGF14-AS2,0;ENSG00000102466_FGF14,7422			0.00198786	0.186503	Diagnosis	Immature
chr13:102773353-102774279	ENSG00000151287_TEX30,0	ENSG00000151287_TEX30,0			0.0020636	0.188489	Diagnosis	Immature
chr13:102798601-102799489	ENSG00000134901_POGLUT2,0;ENSG00000134897_BIVM,0	ENSG00000134901_POGLUT2,0;ENSG00000134897_BIVM,0			0.00363317	0.208274	Diagnosis	Immature
chr13:106535265-106536171	ENSG00000125266_EFNB2,0	ENSG00000125266_EFNB2,0			0.000948433	0.176326	Diagnosis	Immature
chr13:109786245-109787170	ENSG00000185950_IRS2,0;ENSG00000275741_AL162497.1,414	ENSG00000185950_IRS2,0;ENSG00000275741_AL162497.1,414			0.00255801	0.195293	Diagnosis	Immature
chr13:110712775-110713463	ENSG00000153487_ING1,39;ENSG00000134905_CARS2,140	ENSG00000153487_ING1,39;ENSG00000134905_CARS2,140			0.00321772	0.202248	Diagnosis	Immature
chr13:110715142-110716059	ENSG00000134905_CARS2,-1539	ENSG00000153487_ING1,2406			0.00375091	0.209409	Diagnosis	Immature
chr13:110914847-110915745	ENSG00000277767_AL442128.2,-259;ENSG00000088448_ANKRD10,0	ENSG00000088448_ANKRD10,0			0.00118191	0.177939	Diagnosis	Immature
chr13:111240729-111241627		ENSG00000102606_ARHGEF7,126170			0.00666193	0.235866	Diagnosis	Immature
chr13:112587673-112588415	ENSG00000126216_TUBGCP3,0	ENSG00000126216_TUBGCP3,0			0.0048838	0.220175	Diagnosis	Immature
chr13:112752857-112753684	ENSG00000232684_ATP11A-AS1,1009	ENSG00000232684_ATP11A-AS1,1009;ENSG00000068650_ATP11A,62528			0.00883842	0.248346	Diagnosis	Immature
chr13:113060871-113061723		ENSG00000126217_MCF2L,166493			0.00411318	0.21228	Diagnosis	Immature
chr13:113078615-113079486		ENSG00000126217_MCF2L,184237			0.00862207	0.24598	Diagnosis	Immature
chr13:113490412-113491303	ENSG00000150401_DCUN1D2,0;ENSG00000150403_TMCO3,0	ENSG00000150401_DCUN1D2,0;ENSG00000150403_TMCO3,0			0.00294326	0.198734	Diagnosis	Immature
chr13:114281243-114282152	ENSG00000169062_UPF3A,0	ENSG00000169062_UPF3A,0			0.000134703	0.171004	Diagnosis	Immature
chr13:114314028-114314938	ENSG00000198824_CHAMP1,0	ENSG00000198824_CHAMP1,0			0.00228016	0.193464	Diagnosis	Immature
chr14:20342928-20343835	ENSG00000129484_PARP2,0;ENSG00000259001_AL355075.4,0	ENSG00000259001_AL355075.4,0;ENSG00000129484_PARP2,0			0.00224022	0.19219	Diagnosis	Immature
chr14:20454638-20455558	ENSG00000092094_OSGEP,0;ENSG00000100823_APEX1,0	ENSG00000092094_OSGEP,0;ENSG00000100823_APEX1,0			0.00797833	0.243514	Diagnosis	Immature
chr14:20461203-20462137	ENSG00000165782_PIP4P1,0	ENSG00000165782_PIP4P1,0			0.00298546	0.199505	Diagnosis	Immature
chr14:20682367-20683267	ENSG00000258818_RNASE4,-1293;ENSG00000214274_ANG,-910				0.00710852	0.238659	Diagnosis	Immature
chr14:20970998-20971837					0.00630216	0.232937	Diagnosis	Immature
chr14:20989539-20990420	ENSG00000165792_METTL17,0	ENSG00000165792_METTL17,0			0.00789951	0.242697	Diagnosis	Immature
chr14:21103498-21104347	ENSG00000165804_ZNF219,375	ENSG00000165804_ZNF219,375;ENSG00000232070_TMEM253,4561			0.00110384	0.17692	Diagnosis	Immature
chr14:21525920-21526797		ENSG00000165821_SALL2,10419			0.00709193	0.238612	Diagnosis	Immature
chr14:21649763-21650609					0.00600194	0.230409	Diagnosis	Immature
chr14:22918856-22919713	ENSG00000237054_PRMT5-AS1,0;ENSG00000100461_RBM23,0	ENSG00000100461_RBM23,0;ENSG00000237054_PRMT5-AS1,0			0.00811005	0.243514	Diagnosis	Immature
chr14:23094802-23095682	ENSG00000179933_C14orf119,0;ENSG00000100813_ACIN1,0	ENSG00000100813_ACIN1,0;ENSG00000179933_C14orf119,0			0.00127708	0.180403	Diagnosis	Immature
chr14:23320854-23321752	ENSG00000100836_PABPN1,0	ENSG00000100836_PABPN1,0;ENSG00000258643_BCL2L2-PABPN1,14019			0.00187539	0.184273	Diagnosis	Immature
chr14:23376360-23377237	ENSG00000166091_CMTM5,0	ENSG00000166091_CMTM5,0;ENSG00000166090_IL25,3551			0.00326419	0.202646	Diagnosis	Immature
chr14:23469007-23469933	ENSG00000129460_NGDN,0	ENSG00000129460_NGDN,0			0.000213484	0.171004	Diagnosis	Immature
chr14:23551338-23552193		ENSG00000136367_ZFHX2,3999;ENSG00000157306_ZFHX2-AS1,39578			0.0034555	0.205451	Diagnosis	Immature
chr14:23555618-23556524	ENSG00000259431_THTPA,0;ENSG00000136367_ZFHX2,0	ENSG00000136367_ZFHX2,0;ENSG00000259431_THTPA,0;ENSG00000157306_ZFHX2-AS1,43858			0.00109026	0.17692	Diagnosis	Immature
chr14:24114400-24115296	ENSG00000129535_NRL,0;ENSG00000100897_DCAF11,205	ENSG00000129535_NRL,0;ENSG00000100897_DCAF11,205			0.00113234	0.17692	Diagnosis	Immature
chr14:24212992-24213889	ENSG00000254505_CHMP4A,0	ENSG00000254505_CHMP4A,0			0.00158248	0.182746	Diagnosis	Immature
chr14:24242146-24243024	ENSG00000092330_TINF2,0	ENSG00000092330_TINF2,0			0.00655887	0.235673	Diagnosis	Immature
chr14:24310524-24311414	ENSG00000213903_LTB4R,-36;ENSG00000136305_CIDEB,16	ENSG00000136305_CIDEB,16;ENSG00000213906_LTB4R2,4790			0.00604987	0.230426	Diagnosis	Immature
chr14:26597852-26598752	ENSG00000258081_AL110292.1,-1003;ENSG00000139910_NOVA1,0;ENSG00000257842_LINC02588,0	ENSG00000139910_NOVA1,0;ENSG00000257842_LINC02588,0			0.0090127	0.249934	Diagnosis	Immature
chr14:29927412-29928147	ENSG00000287142_AL355053.1,-298	ENSG00000184304_PRKD1,263751			0.00374612	0.209409	Diagnosis	Immature
chr14:31207381-31208299	ENSG00000092148_HECTD1,0	ENSG00000092148_HECTD1,0			0.000720883	0.171004	Diagnosis	Immature
chr14:31456966-31457843	ENSG00000129480_DTD2,0	ENSG00000129480_DTD2,0			0.000885981	0.174388	Diagnosis	Immature
chr14:34081560-34082365		ENSG00000129521_EGLN3,380409			0.0074632	0.240176	Diagnosis	Immature
chr14:34539258-34540174	ENSG00000129518_EAPP,0	ENSG00000129518_EAPP,0			0.00324866	0.202248	Diagnosis	Immature
chr14:35045894-35046757	ENSG00000151327_FAM177A1,987	ENSG00000151327_FAM177A1,987			0.00424135	0.212613	Diagnosis	Immature
chr14:35404465-35404942	ENSG00000100906_NFKBIA,0	ENSG00000100906_NFKBIA,0			0.00157352	0.182746	Diagnosis	Immature
chr14:35422203-35423057					0.00657138	0.235673	Diagnosis	Immature
chr14:35558435-35559309		ENSG00000174373_RALGAPA1,249995			0.00818869	0.243792	Diagnosis	Immature
chr14:35826050-35826829	ENSG00000100916_BRMS1L,0;ENSG00000258938_AL162311.3,0	ENSG00000258938_AL162311.3,0;ENSG00000100916_BRMS1L,0			0.00412551	0.212281	Diagnosis	Immature
chr14:35897522-35898329	ENSG00000258342_AL133304.3,0	ENSG00000258342_AL133304.3,0;ENSG00000100916_BRMS1L,71184			0.00150786	0.182746	Diagnosis	Immature
chr14:37197545-37198450	ENSG00000151338_MIPOL1,0	ENSG00000151338_MIPOL1,0			0.00477025	0.219422	Diagnosis	Immature
chr14:39113841-39114770	ENSG00000092208_GEMIN2,0	ENSG00000092208_GEMIN2,0			0.00403199	0.211609	Diagnosis	Immature
chr14:39169955-39170846	ENSG00000182400_TRAPPC6B,0	ENSG00000182400_TRAPPC6B,0			0.00152438	0.182746	Diagnosis	Immature
chr14:39174681-39175591	ENSG00000100941_PNN,0;ENSG00000259083_AL132639.3,289	ENSG00000100941_PNN,0;ENSG00000259083_AL132639.3,289			0.0067825	0.237192	Diagnosis	Immature
chr14:39432060-39432950	ENSG00000165355_FBXO33,0;ENSG00000258526_AL049828.1,0	ENSG00000165355_FBXO33,0;ENSG00000258526_AL049828.1,0			0.00295543	0.19877	Diagnosis	Immature
chr14:44896952-44897746	ENSG00000258633_AL049870.2,0;ENSG00000179476_C14orf28,0	ENSG00000258633_AL049870.2,0;ENSG00000179476_C14orf28,0			0.000607197	0.171004	Diagnosis	Immature
chr14:44961688-44962569	ENSG00000198718_TOGARAM1,0	ENSG00000198718_TOGARAM1,0;ENSG00000179454_KLHL28,79753			0.00423793	0.212613	Diagnosis	Immature
chr14:45252877-45253771	ENSG00000129534_MIS18BP1,0	ENSG00000129534_MIS18BP1,0			0.0023737	0.193625	Diagnosis	Immature
chr14:49767606-49768518	ENSG00000165516_KLHDC2,0	ENSG00000165516_KLHDC2,0			0.00159379	0.182746	Diagnosis	Immature
chr14:49862503-49863404	ENSG00000278002_AL627171.1,0;ENSG00000282885_AL627171.2,922	ENSG00000278002_AL627171.1,0;ENSG00000282885_AL627171.2,922			0.000247529	0.171004	Diagnosis	Immature
chr14:49892525-49893435	ENSG00000165527_ARF6,0	ENSG00000165527_ARF6,0			0.00129785	0.181017	Diagnosis	Immature
chr14:50116139-50117065	ENSG00000100483_VCPKMT,0	ENSG00000100483_VCPKMT,0			0.00266349	0.196147	Diagnosis	Immature
chr14:50532180-50533017	ENSG00000198513_ATL1,0	ENSG00000198513_ATL1,0;ENSG00000012983_MAP4K5,28109			0.00162476	0.183273	Diagnosis	Immature
chr14:51094811-51095671	ENSG00000100505_TRIM9,390	ENSG00000100505_TRIM9,390			0.00312258	0.200884	Diagnosis	Immature
chr14:51825557-51826429	ENSG00000186469_GNG2,0	ENSG00000186469_GNG2,0			0.00797641	0.243514	Diagnosis	Immature
chr14:51989076-51990000	ENSG00000258854_AL358333.1,-1857;ENSG00000087302_RTRAF,0	ENSG00000087302_RTRAF,0			0.00269649	0.19664	Diagnosis	Immature
chr14:52552233-52553145	ENSG00000087301_TXNDC16,0;ENSG00000180998_GPR137C,0	ENSG00000087301_TXNDC16,0;ENSG00000180998_GPR137C,0			0.000740239	0.171279	Diagnosis	Immature
chr14:52729679-52730546	ENSG00000198252_STYX,0	ENSG00000198252_STYX,0			0.00716773	0.23926	Diagnosis	Immature
chr14:52791206-52792119	ENSG00000100522_GNPNAT1,0;ENSG00000285664_AL139317.5,0	ENSG00000100522_GNPNAT1,0;ENSG00000285664_AL139317.5,0			0.00169722	0.184273	Diagnosis	Immature
chr14:53152853-53153696	ENSG00000100523_DDHD1,0;ENSG00000258731_AL356020.1,0	ENSG00000100523_DDHD1,0;ENSG00000258731_AL356020.1,0			0.00233749	0.193625	Diagnosis	Immature
chr14:55026735-55027654	ENSG00000198554_WDHD1,0;ENSG00000180008_SOCS4,0	ENSG00000198554_WDHD1,0;ENSG00000180008_SOCS4,0			0.00203962	0.187846	Diagnosis	Immature
chr14:55270982-55271825	ENSG00000178974_FBXO34,0;ENSG00000258413_AL158801.2,250	ENSG00000178974_FBXO34,0;ENSG00000258413_AL158801.2,250			0.000610135	0.171004	Diagnosis	Immature
chr14:55411373-55412286	ENSG00000126775_ATG14,0	ENSG00000126775_ATG14,0			0.00738132	0.240085	Diagnosis	Immature
chr14:56117904-56118740	ENSG00000277763_AL138995.1,0;ENSG00000139946_PELI2,90	ENSG00000277763_AL138995.1,0;ENSG00000139946_PELI2,90			0.00747073	0.240176	Diagnosis	Immature
chr14:57268324-57269267	ENSG00000070367_EXOC5,0;ENSG00000053770_AP5M1,0	ENSG00000070367_EXOC5,0;ENSG00000053770_AP5M1,0			0.00073935	0.171279	Diagnosis	Immature
chr14:59188095-59189011	ENSG00000100592_DAAM1,0	ENSG00000100592_DAAM1,0			0.00827569	0.244261	Diagnosis	Immature
chr14:61608889-61609662		ENSG00000232774_AL355916.1,38484			0.00810341	0.243514	Diagnosis	Immature
chr14:61694988-61695849	ENSG00000100644_HIF1A,0;ENSG00000258777_HIF1A-AS1,0	ENSG00000258777_HIF1A-AS1,0;ENSG00000100644_HIF1A,0			0.00857447	0.245483	Diagnosis	Immature
chr14:62116901-62117810	ENSG00000258903_AL390816.2,0	ENSG00000258903_AL390816.2,0			0.00623353	0.232369	Diagnosis	Immature
chr14:63727589-63728402	ENSG00000126821_SGPP1,0	ENSG00000126821_SGPP1,0			0.00821578	0.243792	Diagnosis	Immature
chr14:64338357-64339199	ENSG00000140009_ESR2,-245;ENSG00000214770_AL161756.1,0	ENSG00000214770_AL161756.1,0			0.00473859	0.219012	Diagnosis	Immature
chr14:64572743-64573579		ENSG00000165807_PPP1R36,22823;ENSG00000259076_AL049869.2,22957			0.00419754	0.212499	Diagnosis	Immature
chr14:65102173-65103088	ENSG00000125952_MAX,0	ENSG00000125952_MAX,0			0.00466029	0.217535	Diagnosis	Immature
chr14:65230227-65230776					0.00726587	0.239479	Diagnosis	Immature
chr14:67240874-67241726	ENSG00000072415_MPP5,0	ENSG00000072415_MPP5,0			0.000409908	0.171004	Diagnosis	Immature
chr14:68816195-68817075					0.00221653	0.191381	Diagnosis	Immature
chr14:69611209-69612071	ENSG00000100647_SUSD6,0	ENSG00000100647_SUSD6,0			0.00507671	0.221637	Diagnosis	Immature
chr14:69963666-69964547		ENSG00000198732_SMOC1,109535			0.000187888	0.171004	Diagnosis	Immature
chr14:72729522-72730288		ENSG00000205683_DPF3,163828			0.00840925	0.244479	Diagnosis	Immature
chr14:72893760-72894638	ENSG00000205683_DPF3,0	ENSG00000205683_DPF3,0			0.00205628	0.188276	Diagnosis	Immature
chr14:73490670-73491474	ENSG00000170468_RIOX1,0	ENSG00000170468_RIOX1,0;ENSG00000187105_HEATR4,67473			0.00358965	0.208274	Diagnosis	Immature
chr14:74084189-74085124	ENSG00000119711_ALDH6A1,0;ENSG00000205659_LIN52,0	ENSG00000119711_ALDH6A1,0;ENSG00000205659_LIN52,0			0.0020788	0.1888	Diagnosis	Immature
chr14:75237110-75238009					0.00781969	0.242075	Diagnosis	Immature
chr14:75293805-75294701	ENSG00000259687_LINC01220,0	ENSG00000259687_LINC01220,0			0.00752512	0.240176	Diagnosis	Immature
chr14:75982074-75982938	ENSG00000119699_TGFB3,53	ENSG00000119699_TGFB3,53;ENSG00000119650_IFT43,79938			0.00270607	0.196728	Diagnosis	Immature
chr14:76151504-76152348	ENSG00000089916_GPATCH2L,0;ENSG00000283629_AC016526.4,279	ENSG00000089916_GPATCH2L,0;ENSG00000283629_AC016526.4,279			0.00681422	0.237417	Diagnosis	Immature
chr14:76946948-76947860					0.00220226	0.191381	Diagnosis	Immature
chr14:77032963-77033762					0.00474304	0.219127	Diagnosis	Immature
chr14:77097668-77098579	ENSG00000198894_CIPC,0	ENSG00000198894_CIPC,0			0.00552656	0.224691	Diagnosis	Immature
chr14:77320754-77321511	ENSG00000009830_POMT2,0;ENSG00000100577_GSTZ1,0	ENSG00000009830_POMT2,0;ENSG00000100577_GSTZ1,0			0.00100288	0.17652	Diagnosis	Immature
chr14:77616365-77617252	ENSG00000100596_SPTLC2,0	ENSG00000100596_SPTLC2,0			0.00833075	0.244261	Diagnosis	Immature
chr14:81220694-81221554	ENSG00000273783_AL136040.1,0;ENSG00000165417_GTF2A1,0	ENSG00000165417_GTF2A1,0;ENSG00000273783_AL136040.1,0			0.000452106	0.171004	Diagnosis	Immature
chr14:81533502-81534403	ENSG00000071537_SEL1L,0	ENSG00000071537_SEL1L,0			7.33014e-05	0.171004	Diagnosis	Immature
chr14:87174454-87175283					0.00698943	0.237986	Diagnosis	Immature
chr14:88323042-88323906		ENSG00000100433_KCNK10,3001			0.00591777	0.229856	Diagnosis	Immature
chr14:88385249-88386146	ENSG00000042317_SPATA7,325	ENSG00000042317_SPATA7,325			0.00318747	0.201847	Diagnosis	Immature
chr14:88792457-88793330	ENSG00000165521_EML5,0	ENSG00000165521_EML5,0			0.00753873	0.240176	Diagnosis	Immature
chr14:88824113-88825062	ENSG00000274492_AL121768.1,-1962;ENSG00000165533_TTC8,0	ENSG00000165533_TTC8,0			0.00419499	0.212499	Diagnosis	Immature
chr14:89415764-89416558	ENSG00000258920_FOXN3-AS1,-796	ENSG00000053254_FOXN3,202591			0.00810952	0.243514	Diagnosis	Immature
chr14:90382856-90383769	ENSG00000275198_AL512791.2,0	ENSG00000275198_AL512791.2,0			0.0025721	0.195293	Diagnosis	Immature
chr14:90454051-90454932	ENSG00000258678_LINC02317,195;ENSG00000233208_LINC00642,480	ENSG00000258678_LINC02317,195;ENSG00000233208_LINC00642,480			0.0055942	0.224869	Diagnosis	Immature
chr14:91417464-91418343	ENSG00000015133_CCDC88C,0;ENSG00000258798_AL133153.2,0	ENSG00000015133_CCDC88C,0;ENSG00000258798_AL133153.2,0			0.00881721	0.248249	Diagnosis	Immature
chr14:92748221-92749112	ENSG00000100600_LGMN,0	ENSG00000100600_LGMN,0			0.00692116	0.237705	Diagnosis	Immature
chr14:93036423-93037249		ENSG00000100605_ITPK1,79071			0.00162899	0.183305	Diagnosis	Immature
chr14:93115096-93115901	ENSG00000100605_ITPK1,419	ENSG00000100605_ITPK1,419			0.000423749	0.171004	Diagnosis	Immature
chr14:93184492-93185378	ENSG00000165943_MOAP1,0;ENSG00000153485_TMEM251,0	ENSG00000165943_MOAP1,0;ENSG00000153485_TMEM251,0			0.000513084	0.171004	Diagnosis	Immature
chr14:93206771-93207655	ENSG00000170270_GON7,0;ENSG00000012963_UBR7,0	ENSG00000170270_GON7,0;ENSG00000012963_UBR7,0			0.00818338	0.243792	Diagnosis	Immature
chr14:94173774-94174674		ENSG00000119698_PPP4R4,27646			0.00361934	0.208274	Diagnosis	Immature
chr14:95157095-95157944	ENSG00000235706_DICER1-AS1,0;ENSG00000100697_DICER1,66	ENSG00000235706_DICER1-AS1,0;ENSG00000100697_DICER1,66			0.00777227	0.241527	Diagnosis	Immature
chr14:96391479-96392376	ENSG00000140057_AK7,0	ENSG00000140057_AK7,0			0.000606088	0.171004	Diagnosis	Immature
chr14:98593140-98594016					0.00188329	0.184273	Diagnosis	Immature
chr14:99271825-99272706	ENSG00000127152_BCL11B,0	ENSG00000127152_BCL11B,0			0.00350674	0.206832	Diagnosis	Immature
chr14:99480668-99481597	ENSG00000183576_SETD3,0;ENSG00000090061_CCNK,0	ENSG00000183576_SETD3,0;ENSG00000090061_CCNK,0			0.00173658	0.184273	Diagnosis	Immature
chr14:99603926-99604832	ENSG00000205476_CCDC85C,0;ENSG00000247970_AL160313.1,0	ENSG00000205476_CCDC85C,0;ENSG00000247970_AL160313.1,0			0.000612246	0.171004	Diagnosis	Immature
chr14:99971097-99971958	ENSG00000196405_EVL,0	ENSG00000196405_EVL,0			0.00114104	0.177242	Diagnosis	Immature
chr14:101809613-101810478	ENSG00000259088_AL137779.2,0	ENSG00000259088_AL137779.2,0;ENSG00000078304_PPP2R5C,47815			0.00552458	0.224691	Diagnosis	Immature
chr14:101947809-101948679	ENSG00000271780_AL118558.3,0	ENSG00000271780_AL118558.3,0			0.00199609	0.186503	Diagnosis	Immature
chr14:101964027-101964896	ENSG00000197102_DYNC1H1,0	ENSG00000197102_DYNC1H1,0			0.000807982	0.174388	Diagnosis	Immature
chr14:102086733-102087677		ENSG00000080824_HSP90AA1,52022			0.00279171	0.196728	Diagnosis	Immature
chr14:102139289-102140207	ENSG00000140153_WDR20,0;ENSG00000080824_HSP90AA1,0	ENSG00000080824_HSP90AA1,0;ENSG00000140153_WDR20,0			0.00810595	0.243514	Diagnosis	Immature
chr14:102304693-102305583	ENSG00000080823_MOK,0	ENSG00000080823_MOK,0			0.00284826	0.196728	Diagnosis	Immature
chr14:102344212-102345081		ENSG00000100865_CINP,17835			0.00157535	0.182746	Diagnosis	Immature
chr14:102516552-102517403					0.00774048	0.241215	Diagnosis	Immature
chr14:102592061-102592940	ENSG00000089902_RCOR1,0	ENSG00000089902_RCOR1,0			0.000313495	0.171004	Diagnosis	Immature
chr14:103333679-103334549	ENSG00000259775_AL138976.2,-1312;ENSG00000100664_EIF5,135	ENSG00000100664_EIF5,135			0.00161135	0.182886	Diagnosis	Immature
chr14:103921099-103921996		ENSG00000156411_ATP5MPL,6273			0.00657886	0.235673	Diagnosis	Immature
chr14:104665699-104666616	ENSG00000260792_LINC02280,-141				0.00830245	0.244261	Diagnosis	Immature
chr14:104689102-104689994	ENSG00000203485_INF2,0;ENSG00000258858_AL583722.4,1290	ENSG00000203485_INF2,0			0.0066351	0.235689	Diagnosis	Immature
chr14:104694389-104695246		ENSG00000203485_INF2,4783			0.0075601	0.240176	Diagnosis	Immature
chr14:104815604-104816538					0.000398945	0.171004	Diagnosis	Immature
chr14:105168446-105169312	ENSG00000184916_JAG2,0	ENSG00000184916_JAG2,0			0.00118223	0.177939	Diagnosis	Immature
chr14:105414698-105415586		ENSG00000226174_TEX22,16160			0.00563234	0.225411	Diagnosis	Immature
chr14:105499057-105499947		ENSG00000185347_TEDC1,9202			0.00158534	0.182746	Diagnosis	Immature
chr15:27863813-27864716		ENSG00000104044_OCA2,234599			0.00435264	0.21268	Diagnosis	Immature
chr15:28994620-28995514		ENSG00000034053_APBA2,110137			0.000430227	0.171004	Diagnosis	Immature
chr15:30625503-30626430	ENSG00000247728_AC091057.2,0;ENSG00000284906_ARHGAP11B,955;ENSG00000285077_AC091057.6,1009	ENSG00000247728_AC091057.2,0;ENSG00000284906_ARHGAP11B,955;ENSG00000285077_AC091057.6,1009			0.00650176	0.235379	Diagnosis	Immature
chr15:30903372-30904304		ENSG00000198690_FAN1,12813			0.00309205	0.200127	Diagnosis	Immature
chr15:32669932-32670835		ENSG00000241818_AC123768.1,2230;ENSG00000166922_SCG5,28256			0.00387484	0.210077	Diagnosis	Immature
chr15:34366987-34367827	ENSG00000176454_LPCAT4,0	ENSG00000176454_LPCAT4,0			0.00256251	0.195293	Diagnosis	Immature
chr15:37100144-37101025	ENSG00000134138_MEIS2,274;ENSG00000259460_AC078909.1,805	ENSG00000134138_MEIS2,274;ENSG00000259460_AC078909.1,805			0.00164279	0.183679	Diagnosis	Immature
chr15:38072517-38073436	ENSG00000236914_LINC01852,0	ENSG00000236914_LINC01852,0			0.000970407	0.176326	Diagnosis	Immature
chr15:39153400-39154263		ENSG00000259345_AC013652.1,272932;ENSG00000175779_LINC02694,525395			0.00613871	0.23142	Diagnosis	Immature
chr15:39641779-39642603		ENSG00000150667_FSIP1,140238			0.00398978	0.211609	Diagnosis	Immature
chr15:39933673-39934572	ENSG00000128829_EIF2AK4,0	ENSG00000128829_EIF2AK4,0			0.00291891	0.198392	Diagnosis	Immature
chr15:40108497-40109381	ENSG00000104081_BMF,0	ENSG00000104081_BMF,0			0.0022642	0.193249	Diagnosis	Immature
chr15:40290867-40291775		ENSG00000137841_PLCB2,16160			0.00477427	0.219422	Diagnosis	Immature
chr15:40754841-40755719	ENSG00000137824_RMDN3,132	ENSG00000137824_RMDN3,132			0.00239879	0.193625	Diagnosis	Immature
chr15:40893904-40894790	ENSG00000104142_VPS18,0	ENSG00000104142_VPS18,0			0.00424513	0.212613	Diagnosis	Immature
chr15:41115885-41116763	ENSG00000128908_INO80,0	ENSG00000128908_INO80,0			0.00364026	0.208296	Diagnosis	Immature
chr15:41283514-41284434	ENSG00000247556_OIP5-AS1,0	ENSG00000247556_OIP5-AS1,0			0.00313994	0.200884	Diagnosis	Immature
chr15:41621202-41622147	ENSG00000174197_MGA,0	ENSG00000174197_MGA,0;ENSG00000260926_AC016134.1,8761			0.00174282	0.184273	Diagnosis	Immature
chr15:41827600-41828519	ENSG00000250379_AC020659.2,0;ENSG00000243789_JMJD7,0	ENSG00000250379_AC020659.2,0;ENSG00000243789_JMJD7,0;ENSG00000137802_MAPKBP1,53166			0.00491426	0.220175	Diagnosis	Immature
chr15:42490624-42491519	ENSG00000103994_ZNF106,0;ENSG00000092531_SNAP23,0	ENSG00000103994_ZNF106,0;ENSG00000092531_SNAP23,0			0.00790373	0.242725	Diagnosis	Immature
chr15:42575023-42575922	ENSG00000159433_STARD9,0	ENSG00000159433_STARD9,0			0.00869529	0.24693	Diagnosis	Immature
chr15:42581105-42582018		ENSG00000159433_STARD9,5499			0.008331	0.244261	Diagnosis	Immature
chr15:43105616-43106518	ENSG00000159459_UBR1,0	ENSG00000159459_UBR1,0;ENSG00000285080_AC068724.3,79261			0.00700263	0.237986	Diagnosis	Immature
chr15:43510454-43511356	ENSG00000067369_TP53BP1,0;ENSG00000166963_MAP1A,0	ENSG00000067369_TP53BP1,0;ENSG00000166963_MAP1A,0			0.00469253	0.218063	Diagnosis	Immature
chr15:43791757-43792660		ENSG00000140264_SERF2,14670			0.00538804	0.224103	Diagnosis	Immature
chr15:44194881-44195730	ENSG00000171877_FRMD5,0	ENSG00000171877_FRMD5,0			0.00570682	0.226717	Diagnosis	Immature
chr15:44288383-44289299	ENSG00000166734_CASC4,0	ENSG00000166734_CASC4,0			0.00277625	0.196728	Diagnosis	Immature
chr15:44426857-44427686	ENSG00000259595_AC025043.1,0;ENSG00000137770_CTDSPL2,0	ENSG00000259595_AC025043.1,0;ENSG00000137770_CTDSPL2,0			0.000172625	0.171004	Diagnosis	Immature
chr15:45200243-45201020	ENSG00000259932_AC051619.7,-1104;ENSG00000260035_AC051619.8,0;ENSG00000138606_SHF,155	ENSG00000260035_AC051619.8,0;ENSG00000138606_SHF,155			0.000718411	0.171004	Diagnosis	Immature
chr15:45372107-45373005		ENSG00000171766_GATM,29322			0.00833487	0.244261	Diagnosis	Immature
chr15:48331239-48332074	ENSG00000259488_AC023355.1,0;ENSG00000128951_DUT,228	ENSG00000259488_AC023355.1,0;ENSG00000128951_DUT,228			0.000928289	0.176098	Diagnosis	Immature
chr15:48810771-48811658	ENSG00000103995_CEP152,0;ENSG00000259700_AC012379.2,70	ENSG00000103995_CEP152,0;ENSG00000259700_AC012379.2,70			0.00125559	0.180169	Diagnosis	Immature
chr15:48975645-48976505					0.00198638	0.186503	Diagnosis	Immature
chr15:49155187-49156064	ENSG00000156958_GALK2,0;ENSG00000166200_COPS2,0	ENSG00000166200_COPS2,0;ENSG00000156958_GALK2,0			0.00147493	0.182371	Diagnosis	Immature
chr15:51681017-51681891	ENSG00000104112_SCG3,0	ENSG00000104112_SCG3,0			0.0081205	0.243514	Diagnosis	Immature
chr15:51737136-51738014		ENSG00000140280_LYSMD2,13571			0.0043704	0.213173	Diagnosis	Immature
chr15:51971250-51972190	ENSG00000166477_LEO1,0	ENSG00000166477_LEO1,0;ENSG00000069956_MAPK6,19144			0.00219975	0.191381	Diagnosis	Immature
chr15:52018988-52019875	ENSG00000274528_AC090970.2,-956;ENSG00000259438_MAPK6-DT,0	ENSG00000259438_MAPK6-DT,0;ENSG00000069956_MAPK6,66882			0.00352715	0.206832	Diagnosis	Immature
chr15:55993188-55994092	ENSG00000069869_NEDD4,0	ENSG00000069869_NEDD4,0			0.00236253	0.193625	Diagnosis	Immature
chr15:56243328-56244133	ENSG00000181827_RFX7,-62;ENSG00000151575_TEX9,0	ENSG00000151575_TEX9,0			0.00414497	0.212281	Diagnosis	Immature
chr15:56732963-56733881	ENSG00000137871_ZNF280D,205	ENSG00000137871_ZNF280D,205			0.00244072	0.193625	Diagnosis	Immature
chr15:56886821-56887735	ENSG00000276524_AC010999.2,0	ENSG00000276524_AC010999.2,0;ENSG00000285331_AC090517.5,30764			0.00249685	0.193923	Diagnosis	Immature
chr15:58571492-58572375					0.00791927	0.242767	Diagnosis	Immature
chr15:58770801-58771679	ENSG00000245975_AC090515.2,0;ENSG00000128923_MINDY2,0	ENSG00000245975_AC090515.2,0;ENSG00000128923_MINDY2,0			0.00244507	0.193788	Diagnosis	Immature
chr15:58987466-58988242		ENSG00000157450_RNF111,122291			0.0065868	0.235673	Diagnosis	Immature
chr15:59150031-59150904		ENSG00000157483_MYO1E,221967			0.00901186	0.249934	Diagnosis	Immature
chr15:59372397-59373230	ENSG00000157470_FAM81A,0;ENSG00000157483_MYO1E,0	ENSG00000157483_MYO1E,0;ENSG00000157470_FAM81A,0			0.00779555	0.241813	Diagnosis	Immature
chr15:60592108-60592896	ENSG00000273958_AC009560.1,-131	ENSG00000245534_RORA-AS1,112956;ENSG00000069667_RORA,636406			0.00806171	0.243514	Diagnosis	Immature
chr15:62390032-62390892	ENSG00000274340_AC032011.1,-1157;ENSG00000171914_TLN2,0	ENSG00000171914_TLN2,0			0.00387214	0.210077	Diagnosis	Immature
chr15:63047952-63048838	ENSG00000259498_TPM1-AS,549	ENSG00000259498_TPM1-AS,549;ENSG00000140416_TPM1,5320			0.000646303	0.171004	Diagnosis	Immature
chr15:63276966-63277853	ENSG00000138613_APH1B,948	ENSG00000138613_APH1B,948			0.00470189	0.218315	Diagnosis	Immature
chr15:64093498-64094411	ENSG00000166797_CIAO2A,0;ENSG00000028528_SNX1,0	ENSG00000166797_CIAO2A,0;ENSG00000028528_SNX1,0			0.0013585	0.181375	Diagnosis	Immature
chr15:64144339-64145251		ENSG00000028528_SNX1,50216			0.00659598	0.235673	Diagnosis	Immature
chr15:64162725-64163639	ENSG00000166794_PPIB,0	ENSG00000166794_PPIB,0			0.00556789	0.224869	Diagnosis	Immature
chr15:64841169-64842087	ENSG00000241839_PLEKHO2,0	ENSG00000241839_PLEKHO2,0			0.00159519	0.182746	Diagnosis	Immature
chr15:64893690-64894607					0.00336375	0.205115	Diagnosis	Immature
chr15:65304128-65304948					0.00623326	0.232369	Diagnosis	Immature
chr15:65517187-65518075	ENSG00000074603_DPP8,0	ENSG00000074603_DPP8,0			0.00301434	0.199762	Diagnosis	Immature
chr15:65530067-65530940	ENSG00000074696_HACD3,0	ENSG00000074696_HACD3,0			0.00501195	0.221118	Diagnosis	Immature
chr15:65868945-65869847		ENSG00000103769_RAB11A,142891			0.00203975	0.187846	Diagnosis	Immature
chr15:66386401-66387268	ENSG00000075131_TIPIN,0;ENSG00000169032_MAP2K1,0	ENSG00000075131_TIPIN,0;ENSG00000169032_MAP2K1,0			0.00273676	0.196728	Diagnosis	Immature
chr15:66497346-66498229	ENSG00000174446_SNAPC5,0	ENSG00000174446_SNAPC5,0;ENSG00000174444_RPL4,26303			0.0082025	0.243792	Diagnosis	Immature
chr15:66504592-66505528	ENSG00000174442_ZWILCH,0	ENSG00000174442_ZWILCH,0;ENSG00000174444_RPL4,19004			0.00625821	0.23271	Diagnosis	Immature
chr15:67065087-67066021	ENSG00000259347_AC087482.1,0;ENSG00000166949_SMAD3,1324	ENSG00000259347_AC087482.1,0;ENSG00000166949_SMAD3,1324			0.00882216	0.248249	Diagnosis	Immature
chr15:67358461-67359392		ENSG00000103599_IQCH,103675;ENSG00000259673_IQCH-AS1,162452			0.00445501	0.21447	Diagnosis	Immature
chr15:68277412-68278328	ENSG00000169018_FEM1B,0;ENSG00000260657_AC107871.2,0	ENSG00000260657_AC107871.2,0;ENSG00000169018_FEM1B,0			0.00333312	0.204864	Diagnosis	Immature
chr15:68306281-68307134		ENSG00000137809_ITGA11,125029			0.00480006	0.219715	Diagnosis	Immature
chr15:68579252-68579912	ENSG00000103647_CORO2B,283	ENSG00000103647_CORO2B,283			0.00724312	0.239479	Diagnosis	Immature
chr15:68614431-68615338		ENSG00000103647_CORO2B,35462			0.000640399	0.171004	Diagnosis	Immature
chr15:68651859-68652783		ENSG00000103647_CORO2B,72890			0.00681101	0.237417	Diagnosis	Immature
chr15:69452420-69453319	ENSG00000137818_RPLP1,0	ENSG00000137818_RPLP1,0			0.000418045	0.171004	Diagnosis	Immature
chr15:70348773-70349693					0.00507854	0.221637	Diagnosis	Immature
chr15:70892152-70893066	ENSG00000129028_THAP10,0	ENSG00000129028_THAP10,0;ENSG00000137821_LRRC49,38913			0.00164309	0.183679	Diagnosis	Immature
chr15:72117671-72118604	ENSG00000066933_MYO9A,0	ENSG00000066933_MYO9A,0;ENSG00000166192_SENP8,3413			0.00373632	0.209409	Diagnosis	Immature
chr15:72229853-72230715	ENSG00000067225_PKM,1107	ENSG00000067225_PKM,1107			0.00115078	0.177762	Diagnosis	Immature
chr15:72231001-72231803	ENSG00000067225_PKM,19	ENSG00000067225_PKM,19			0.00456592	0.216559	Diagnosis	Immature
chr15:72306152-72306883		ENSG00000140488_CELF6,13274;ENSG00000261460_AC009690.2,27285			0.00896293	0.24992	Diagnosis	Immature
chr15:72473794-72474664	ENSG00000166233_ARIH1,0;ENSG00000261423_TMEM202-AS1,504	ENSG00000166233_ARIH1,0;ENSG00000261423_TMEM202-AS1,504			0.00822049	0.243792	Diagnosis	Immature
chr15:73994237-73995113	ENSG00000067221_STOML1,0;ENSG00000140464_PML,0	ENSG00000067221_STOML1,0;ENSG00000140464_PML,0			0.0049859	0.221118	Diagnosis	Immature
chr15:74421213-74422101		ENSG00000138623_SEMA7A,11857			0.00542007	0.224199	Diagnosis	Immature
chr15:74614288-74615061	ENSG00000260919_AC100835.1,535	ENSG00000260919_AC100835.1,535;ENSG00000179335_CLK3,15788			0.00805808	0.243514	Diagnosis	Immature
chr15:74781686-74782563	ENSG00000103653_CSK,0	ENSG00000103653_CSK,0			0.00750077	0.240176	Diagnosis	Immature
chr15:74842745-74843626	ENSG00000140474_ULK3,0	ENSG00000140474_ULK3,0			0.000856921	0.174388	Diagnosis	Immature
chr15:74889544-74890441	ENSG00000178802_MPI,0	ENSG00000178802_MPI,0			0.00692619	0.237705	Diagnosis	Immature
chr15:75367838-75368579	ENSG00000260274_AC068338.2,0;ENSG00000140400_MAN2C1,33	ENSG00000260274_AC068338.2,0;ENSG00000140400_MAN2C1,33			0.002311	0.193625	Diagnosis	Immature
chr15:75453814-75454681	ENSG00000276744_AC105137.2,0;ENSG00000169375_SIN3A,1161	ENSG00000276744_AC105137.2,0;ENSG00000169375_SIN3A,1161			0.00183815	0.184273	Diagnosis	Immature
chr15:75625369-75626224	ENSG00000169371_SNUPN,245;ENSG00000260235_AC105020.3,576	ENSG00000169371_SNUPN,245;ENSG00000260235_AC105020.3,576			0.00679606	0.237283	Diagnosis	Immature
chr15:75903522-75904372	ENSG00000167196_FBXO22,0	ENSG00000167196_FBXO22,0			0.00579356	0.228176	Diagnosis	Immature
chr15:76931247-76932124	ENSG00000117906_RCN2,0	ENSG00000117906_RCN2,0			0.000215372	0.171004	Diagnosis	Immature
chr15:77083542-77084453	ENSG00000140391_TSPAN3,0	ENSG00000140391_TSPAN3,0			0.00657701	0.235673	Diagnosis	Immature
chr15:77497018-77497846					0.00420738	0.212499	Diagnosis	Immature
chr15:77554433-77555343					0.00512531	0.221829	Diagnosis	Immature
chr15:81015485-81016339		ENSG00000156206_CFAP161,8452			0.00171634	0.184273	Diagnosis	Immature
chr15:82571493-82572385		ENSG00000214575_CPEB1,76476			0.00693547	0.237705	Diagnosis	Immature
chr15:82809303-82810119	ENSG00000156232_WHAMM,0	ENSG00000156232_WHAMM,0			0.00179861	0.184273	Diagnosis	Immature
chr15:82985676-82986606	ENSG00000103942_HOMER2,0;ENSG00000169612_RAMAC,0	ENSG00000103942_HOMER2,0;ENSG00000169612_RAMAC,0;ENSG00000259805_AC022558.2,59792			0.00629219	0.232935	Diagnosis	Immature
chr15:83066824-83067664	ENSG00000064726_BTBD1,0	ENSG00000064726_BTBD1,0;ENSG00000260351_AC024270.2,44253;ENSG00000259805_AC022558.2,140940			0.00217504	0.191381	Diagnosis	Immature
chr15:84630920-84631833		ENSG00000275120_AC048382.5,2155			0.00264037	0.1959	Diagnosis	Immature
chr15:84653869-84654711	ENSG00000177082_WDR73,0	ENSG00000177082_WDR73,0			0.00820817	0.243792	Diagnosis	Immature
chr15:85031235-85031996		ENSG00000073417_PDE8A,50795			0.00730812	0.239639	Diagnosis	Immature
chr15:85091673-85092595		ENSG00000073417_PDE8A,111233			0.00230558	0.193625	Diagnosis	Immature
chr15:85794476-85795338	ENSG00000183655_KLHL25,0	ENSG00000183655_KLHL25,0			0.000603078	0.171004	Diagnosis	Immature
chr15:86916631-86917440		ENSG00000273540_AGBL1,836658			0.00337788	0.205115	Diagnosis	Immature
chr15:88283207-88284074					0.00834267	0.244261	Diagnosis	Immature
chr15:89334426-89335328	ENSG00000140521_POLG,0;ENSG00000261441_AC124068.2,0	ENSG00000140521_POLG,0;ENSG00000261441_AC124068.2,0			0.00188881	0.184273	Diagnosis	Immature
chr15:90265198-90266095	ENSG00000182768_NGRN,0	ENSG00000182768_NGRN,0;ENSG00000213471_TTLL13P,15668			0.00120925	0.179147	Diagnosis	Immature
chr15:90351747-90352660	ENSG00000196391_ZNF774,0	ENSG00000196391_ZNF774,0			0.00591085	0.229811	Diagnosis	Immature
chr15:90387758-90388616	ENSG00000140575_IQGAP1,0	ENSG00000140575_IQGAP1,0			0.00430795	0.212666	Diagnosis	Immature
chr15:90529564-90530407	ENSG00000140577_CRTC3,0	ENSG00000140577_CRTC3,0			0.00738486	0.240085	Diagnosis	Immature
chr15:90954519-90955379	ENSG00000166965_RCCD1,0;ENSG00000258384_AC068831.1,0	ENSG00000258384_AC068831.1,0;ENSG00000166965_RCCD1,0			0.00319317	0.201847	Diagnosis	Immature
chr15:92808858-92809778	ENSG00000258922_AC106028.2,-291;ENSG00000185442_FAM174B,106;ENSG00000274215_AC106028.4,407	ENSG00000185442_FAM174B,106;ENSG00000274215_AC106028.4,407			0.000200989	0.171004	Diagnosis	Immature
chr15:92903919-92904833		ENSG00000173575_CHD2,3730			0.00329275	0.203762	Diagnosis	Immature
chr15:97235002-97235894		ENSG00000259485_LINC02253,19190			0.00615878	0.231554	Diagnosis	Immature
chr15:97525511-97526365					0.00399921	0.211609	Diagnosis	Immature
chr15:97960103-97960995	ENSG00000140450_ARRDC4,0	ENSG00000140450_ARRDC4,0			0.000192038	0.171004	Diagnosis	Immature
chr15:98292451-98293326	ENSG00000259199_AC022523.1,0	ENSG00000259199_AC022523.1,0			0.00183552	0.184273	Diagnosis	Immature
chr15:98647129-98647910	ENSG00000140443_IGF1R,-629;ENSG00000259424_IRAIN,0	ENSG00000259424_IRAIN,0			0.00504461	0.221192	Diagnosis	Immature
chr15:98648067-98648936	ENSG00000259424_IRAIN,-696;ENSG00000140443_IGF1R,0	ENSG00000140443_IGF1R,0			0.00743328	0.240131	Diagnosis	Immature
chr15:98801016-98801662		ENSG00000140443_IGF1R,152477			0.00313669	0.200884	Diagnosis	Immature
chr15:98852031-98852912		ENSG00000140443_IGF1R,203492			0.000389276	0.171004	Diagnosis	Immature
chr15:99104656-99105442	ENSG00000259475_AC036108.1,382	ENSG00000259475_AC036108.1,382;ENSG00000182253_SYNM,6439			0.0037835	0.209409	Diagnosis	Immature
chr15:99105590-99106349	ENSG00000259475_AC036108.1,0	ENSG00000259475_AC036108.1,0;ENSG00000182253_SYNM,7373			0.00534854	0.223628	Diagnosis	Immature
chr15:99565147-99565825	ENSG00000068305_MEF2A,0	ENSG00000068305_MEF2A,0			0.00148789	0.182371	Diagnosis	Immature
chr15:100341642-100342508	ENSG00000140470_ADAMTS17,0	ENSG00000140470_ADAMTS17,0			0.00272052	0.196728	Diagnosis	Immature
chr15:100601975-100602912	ENSG00000183475_ASB7,0;ENSG00000140471_LINS1,318	ENSG00000183475_ASB7,0;ENSG00000140471_LINS1,318			0.000145512	0.171004	Diagnosis	Immature
chr15:101251537-101252381	ENSG00000131873_CHSY1,0	ENSG00000131873_CHSY1,0			0.00174788	0.184273	Diagnosis	Immature
chr15:101277024-101277914	ENSG00000131871_SELENOS,0	ENSG00000131871_SELENOS,0			0.00248461	0.193871	Diagnosis	Immature
chr15:101294806-101295733	ENSG00000131876_SNRPA1,0;ENSG00000259172_AC023024.1,0	ENSG00000131876_SNRPA1,0;ENSG00000259172_AC023024.1,0			0.00227397	0.193278	Diagnosis	Immature
chr15:101489247-101490150		ENSG00000140479_PCSK6,35052			0.0036029	0.208274	Diagnosis	Immature
chr16:10714-11175					0.00833595	0.244261	Diagnosis	Immature
chr16:53283-54199	ENSG00000161980_POLR3K,0;ENSG00000161981_SNRNP25,273	ENSG00000161980_POLR3K,0;ENSG00000161981_SNRNP25,273			0.00805175	0.243514	Diagnosis	Immature
chr16:234398-235272	ENSG00000167930_FAM234A,0	ENSG00000167930_FAM234A,0			0.00470833	0.218523	Diagnosis	Immature
chr16:589386-590173	ENSG00000197562_RAB40C,29	ENSG00000197562_RAB40C,29			0.000716429	0.171004	Diagnosis	Immature
chr16:636258-636522	ENSG00000172366_MCRIP2,-295;ENSG00000130731_METTL26,0	ENSG00000130731_METTL26,0			0.00381568	0.20987	Diagnosis	Immature
chr16:689929-690819	ENSG00000127580_WDR24,0;ENSG00000261659_Z92544.2,928	ENSG00000127580_WDR24,0;ENSG00000261659_Z92544.2,928			0.00247834	0.193871	Diagnosis	Immature
chr16:715954-716809	ENSG00000103260_METRN,836	ENSG00000103260_METRN,836			0.00551885	0.224691	Diagnosis	Immature
chr16:807383-808252					0.00491403	0.220175	Diagnosis	Immature
chr16:912485-913397		ENSG00000103227_LMF1,67921			0.00502674	0.22118	Diagnosis	Immature
chr16:981240-981947	ENSG00000103227_LMF1,0;ENSG00000260807_AC009041.2,0;ENSG00000005513_SOX8,0	ENSG00000103227_LMF1,0;ENSG00000260807_AC009041.2,0;ENSG00000005513_SOX8,0			0.00197138	0.186248	Diagnosis	Immature
chr16:1034646-1035590					0.00595803	0.230022	Diagnosis	Immature
chr16:1351424-1352343	ENSG00000007520_TSR3,0;ENSG00000090581_GNPTG,0	ENSG00000007520_TSR3,0;ENSG00000090581_GNPTG,0			0.00869565	0.24693	Diagnosis	Immature
chr16:1611834-1612699	ENSG00000187535_IFT140,0;ENSG00000007545_CRAMP1,0	ENSG00000187535_IFT140,0;ENSG00000007545_CRAMP1,0			0.000603521	0.171004	Diagnosis	Immature
chr16:1677829-1678676	ENSG00000206053_JPT2,0	ENSG00000206053_JPT2,0;ENSG00000007545_CRAMP1,65504			0.00547416	0.224691	Diagnosis	Immature
chr16:1705640-1706545	ENSG00000275092_AL031710.2,-707;ENSG00000138834_MAPK8IP3,0	ENSG00000138834_MAPK8IP3,0			0.00687412	0.237552	Diagnosis	Immature
chr16:1983546-1984447	ENSG00000196408_NOXO1,0;ENSG00000127554_GFER,0	ENSG00000196408_NOXO1,0;ENSG00000127554_GFER,0			0.000835254	0.174388	Diagnosis	Immature
chr16:2155116-2156029	ENSG00000260260_SNHG19,0;ENSG00000131653_TRAF7,0	ENSG00000260260_SNHG19,0;ENSG00000131653_TRAF7,0			5.00391e-05	0.171004	Diagnosis	Immature
chr16:2267825-2268706	ENSG00000260778_AC009065.4,0;ENSG00000205937_RNPS1,0	ENSG00000205937_RNPS1,0;ENSG00000260778_AC009065.4,0			0.00277179	0.196728	Diagnosis	Immature
chr16:2340338-2341177	ENSG00000167972_ABCA3,0	ENSG00000167972_ABCA3,0			0.00232944	0.193625	Diagnosis	Immature
chr16:2501043-2501950		ENSG00000162065_TBC1D24,25992			0.00130349	0.181017	Diagnosis	Immature
chr16:2513367-2514246	ENSG00000185883_ATP6V0C,0	ENSG00000185883_ATP6V0C,0			0.000480418	0.171004	Diagnosis	Immature
chr16:2537421-2538345	ENSG00000140992_PDPK1,0	ENSG00000140992_PDPK1,0			0.00421309	0.212499	Diagnosis	Immature
chr16:2693022-2693742		ENSG00000167977_KCTD5,10499			0.00643098	0.234104	Diagnosis	Immature
chr16:2882465-2883341	ENSG00000162076_FLYWCH2,0	ENSG00000162076_FLYWCH2,0			0.000147206	0.171004	Diagnosis	Immature
chr16:3106203-3107073	ENSG00000263011_AC108134.4,0	ENSG00000263011_AC108134.4,0			0.00388	0.210107	Diagnosis	Immature
chr16:3152337-3153194					0.00772434	0.241215	Diagnosis	Immature
chr16:3457441-3458350		ENSG00000122390_NAA60,13792;ENSG00000285329_AC025283.2,92342			0.00401668	0.211609	Diagnosis	Immature
chr16:3500540-3501459	ENSG00000103351_CLUAP1,0	ENSG00000103351_CLUAP1,0			0.00251398	0.194438	Diagnosis	Immature
chr16:4350868-4351722		ENSG00000217930_PAM16,3885			0.00385501	0.210077	Diagnosis	Immature
chr16:4411533-4412397		ENSG00000262246_CORO7,13308			0.00146053	0.182371	Diagnosis	Immature
chr16:4538206-4539097	ENSG00000089486_CDIP1,0	ENSG00000089486_CDIP1,0			0.00122896	0.179147	Diagnosis	Immature
chr16:4615944-4616866	ENSG00000153443_UBALD1,-917;ENSG00000102858_MGRN1,0	ENSG00000102858_MGRN1,0			0.000118014	0.171004	Diagnosis	Immature
chr16:4693138-4694032	ENSG00000168101_NUDT16L1,0	ENSG00000168101_NUDT16L1,0			0.00283556	0.196728	Diagnosis	Immature
chr16:4802382-4803245	ENSG00000067836_ROGDI,0	ENSG00000067836_ROGDI,0;ENSG00000140632_GLYR1,44043			0.00675875	0.237192	Diagnosis	Immature
chr16:4962393-4963267	ENSG00000118898_PPL,-1652	ENSG00000103184_SEC14L5,4063			0.00813699	0.243514	Diagnosis	Immature
chr16:8621297-8622169	ENSG00000067365_METTL22,0	ENSG00000067365_METTL22,0			0.00481045	0.219829	Diagnosis	Immature
chr16:8674048-8674945	ENSG00000183044_ABAT,0	ENSG00000183044_ABAT,0			0.00568571	0.226417	Diagnosis	Immature
chr16:8868564-8869374	ENSG00000153048_CARHSP1,0;ENSG00000261481_AC022167.4,0	ENSG00000153048_CARHSP1,0;ENSG00000261481_AC022167.4,0			0.00144448	0.182371	Diagnosis	Immature
chr16:9091057-9091960	ENSG00000182831_C16orf72,0	ENSG00000182831_C16orf72,0			0.00378497	0.209409	Diagnosis	Immature
chr16:10743645-10744541	ENSG00000103274_NUBP1,0	ENSG00000103274_NUBP1,0			0.00325994	0.202496	Diagnosis	Immature
chr16:10944059-10944942	ENSG00000182108_DEXI,-1591;ENSG00000038532_CLEC16A,0	ENSG00000038532_CLEC16A,0			0.00818901	0.243792	Diagnosis	Immature
chr16:11344963-11345876	ENSG00000263080_AC009121.3,0	ENSG00000263080_AC009121.3,0;ENSG00000175643_RMI2,95344			0.00189329	0.184291	Diagnosis	Immature
chr16:11742437-11743325	ENSG00000153066_TXNDC11,0;ENSG00000262420_AC007613.1,527	ENSG00000153066_TXNDC11,0;ENSG00000262420_AC007613.1,527			0.000389568	0.171004	Diagnosis	Immature
chr16:11796920-11797834	ENSG00000122299_ZC3H7A,0;ENSG00000277369_AC010654.1,0	ENSG00000122299_ZC3H7A,0;ENSG00000277369_AC010654.1,0			0.00786006	0.242559	Diagnosis	Immature
chr16:11915610-11916488	ENSG00000103342_GSPT1,0	ENSG00000103342_GSPT1,0			0.00215955	0.191114	Diagnosis	Immature
chr16:11976259-11977166	ENSG00000234719_NPIPB2,0;ENSG00000048471_SNX29,0;ENSG00000260488_AC007216.1,684	ENSG00000234719_NPIPB2,0;ENSG00000048471_SNX29,0;ENSG00000260488_AC007216.1,684			0.00431664	0.212666	Diagnosis	Immature
chr16:13351258-13352195		ENSG00000262801_U91319.1,105026			0.00762106	0.240176	Diagnosis	Immature
chr16:14002943-14003859		ENSG00000262097_LINC02185,12197			0.00760653	0.240176	Diagnosis	Immature
chr16:15055675-15056571	ENSG00000157045_NTAN1,0	ENSG00000157045_NTAN1,0;ENSG00000179889_PDXDC1,81084			0.000361387	0.171004	Diagnosis	Immature
chr16:15154380-15155300	ENSG00000257391_AC126763.1,0	ENSG00000257391_AC126763.1,0			0.00260892	0.1959	Diagnosis	Immature
chr16:15434220-15435119	ENSG00000166780_BMERB1,0	ENSG00000166780_BMERB1,0			0.00362574	0.208274	Diagnosis	Immature
chr16:18801233-18802142	ENSG00000260017_AC138811.1,-941;ENSG00000170540_ARL6IP1,0	ENSG00000170540_ARL6IP1,0			0.00141166	0.182371	Diagnosis	Immature
chr16:19005411-19006333		ENSG00000170537_TMC7,21477			0.00241805	0.193625	Diagnosis	Immature
chr16:19523530-19524364	ENSG00000006007_GDE1,-1407;ENSG00000103540_CCP110,0	ENSG00000103540_CCP110,0			0.00113524	0.17692	Diagnosis	Immature
chr16:20831515-20832405		ENSG00000005189_REXO5,25086;ENSG00000196678_ERI2,67944			0.007756	0.241367	Diagnosis	Immature
chr16:21188389-21189284					0.0029951	0.199738	Diagnosis	Immature
chr16:21520020-21520912					0.00306457	0.2	Diagnosis	Immature
chr16:21523369-21524205					0.00531765	0.223458	Diagnosis	Immature
chr16:22190446-22191307		ENSG00000183921_SDR42E2,24863			0.00234018	0.193625	Diagnosis	Immature
chr16:22205916-22206710	ENSG00000103319_EEF2K,0	ENSG00000103319_EEF2K,0			0.00798636	0.243514	Diagnosis	Immature
chr16:22670233-22671121					0.00337615	0.205115	Diagnosis	Immature
chr16:23149090-23149918	ENSG00000103404_USP31,0	ENSG00000103404_USP31,0			0.000347965	0.171004	Diagnosis	Immature
chr16:23499826-23500650		ENSG00000103365_GGA2,21345			0.000995659	0.176418	Diagnosis	Immature
chr16:23509989-23510883		ENSG00000103365_GGA2,11112			0.0029476	0.198734	Diagnosis	Immature
chr16:23557100-23557983	ENSG00000103353_UBFD1,0;ENSG00000103356_EARS2,0	ENSG00000103356_EARS2,0;ENSG00000103353_UBFD1,0			0.00239212	0.193625	Diagnosis	Immature
chr16:23640942-23641851	ENSG00000083093_PALB2,0;ENSG00000166847_DCTN5,0	ENSG00000083093_PALB2,0;ENSG00000166847_DCTN5,0			0.0042376	0.212613	Diagnosis	Immature
chr16:23835411-23836335	ENSG00000166501_PRKCB,0	ENSG00000166501_PRKCB,0			0.00081457	0.174388	Diagnosis	Immature
chr16:25257390-25258247	ENSG00000155592_ZKSCAN2,0;ENSG00000274925_ZKSCAN2-DT,0	ENSG00000155592_ZKSCAN2,0;ENSG00000274925_ZKSCAN2-DT,0			0.00372789	0.209409	Diagnosis	Immature
chr16:28553695-28554603	ENSG00000176476_SGF29,0;ENSG00000275441_AC020765.2,0	ENSG00000275441_AC020765.2,0;ENSG00000176476_SGF29,0			0.00195789	0.186248	Diagnosis	Immature
chr16:28846049-28846964	ENSG00000178952_TUFM,0;ENSG00000178188_SH2B1,0	ENSG00000178952_TUFM,0;ENSG00000178188_SH2B1,0			0.00878216	0.247747	Diagnosis	Immature
chr16:29613277-29614147					0.00846305	0.244527	Diagnosis	Immature
chr16:29807403-29808335	ENSG00000259952_AC009133.2,0;ENSG00000103495_MAZ,1297	ENSG00000259952_AC009133.2,0;ENSG00000103495_MAZ,1297			0.00279318	0.196728	Diagnosis	Immature
chr16:29973272-29974185	ENSG00000149930_TAOK2,0	ENSG00000149930_TAOK2,0			0.000784241	0.174388	Diagnosis	Immature
chr16:30095871-30096789	ENSG00000250616_AC012645.1,0;ENSG00000090238_YPEL3,126	ENSG00000250616_AC012645.1,0;ENSG00000090238_YPEL3,126			0.00163198	0.183456	Diagnosis	Immature
chr16:30354924-30355817	ENSG00000169217_CD2BP2,0;ENSG00000260219_CD2BP2-DT,0	ENSG00000169217_CD2BP2,0;ENSG00000260219_CD2BP2-DT,0			0.00108814	0.17692	Diagnosis	Immature
chr16:30370501-30371352	ENSG00000169221_TBC1D10B,-7;ENSG00000180209_MYLPF,0	ENSG00000180209_MYLPF,0			0.000577731	0.171004	Diagnosis	Immature
chr16:30445366-30446230	ENSG00000179918_SEPHS2,0	ENSG00000179918_SEPHS2,0			0.0056986	0.226687	Diagnosis	Immature
chr16:30650220-30651137	ENSG00000156858_PRR14,0	ENSG00000156858_PRR14,0			0.0052304	0.222892	Diagnosis	Immature
chr16:30775133-30776009		ENSG00000103549_RNF40,13388			0.00273965	0.196728	Diagnosis	Immature
chr16:30874876-30875756	ENSG00000260083_MIR762HG,0	ENSG00000260083_MIR762HG,0;ENSG00000099385_BCL7C,19204			0.00169065	0.184273	Diagnosis	Immature
chr16:30893740-30894647	ENSG00000150281_CTF1,-1960;ENSG00000099385_BCL7C,313;ENSG00000262721_AC135048.2,569	ENSG00000099385_BCL7C,313;ENSG00000262721_AC135048.2,569;ENSG00000260083_MIR762HG,18518			0.00300271	0.199738	Diagnosis	Immature
chr16:30922448-30923007	ENSG00000099364_FBXL19,-48;ENSG00000260852_FBXL19-AS1,262	ENSG00000260852_FBXL19-AS1,262			0.000170726	0.171004	Diagnosis	Immature
chr16:30923109-30923537	ENSG00000260852_FBXL19-AS1,0;ENSG00000099364_FBXL19,54	ENSG00000260852_FBXL19-AS1,0;ENSG00000099364_FBXL19,54			0.00755769	0.240176	Diagnosis	Immature
chr16:30957351-30958272	ENSG00000275263_AC135048.3,-152;ENSG00000099381_SETD1A,0	ENSG00000099381_SETD1A,0			0.000777826	0.174388	Diagnosis	Immature
chr16:31032949-31033808	ENSG00000103496_STX4,60	ENSG00000103496_STX4,60			0.00102033	0.176647	Diagnosis	Immature
chr16:31094387-31095245	ENSG00000167397_VKORC1,735	ENSG00000167397_VKORC1,735			0.00150956	0.182746	Diagnosis	Immature
chr16:31442645-31443532	ENSG00000176723_ZNF843,0	ENSG00000176723_ZNF843,0			0.00326721	0.20272	Diagnosis	Immature
chr16:31507908-31508826	ENSG00000260625_AC026471.2,0;ENSG00000140688_C16orf58,483	ENSG00000260625_AC026471.2,0;ENSG00000140688_C16orf58,483			0.00726755	0.239479	Diagnosis	Immature
chr16:34587812-34588651					0.00880725	0.248077	Diagnosis	Immature
chr16:46388407-46389210					0.00384373	0.210077	Diagnosis	Immature
chr16:46394273-46395207					0.00847917	0.244796	Diagnosis	Immature
chr16:46401339-46401711					0.00747451	0.240176	Diagnosis	Immature
chr16:46688917-46689802	ENSG00000069329_VPS35,0;ENSG00000091651_ORC6,0	ENSG00000069329_VPS35,0;ENSG00000091651_ORC6,0			4.67037e-05	0.171004	Diagnosis	Immature
chr16:46883775-46884687	ENSG00000166123_GPT2,0	ENSG00000166123_GPT2,0			0.00762838	0.240176	Diagnosis	Immature
chr16:46973233-46974086	ENSG00000069345_DNAJA2,0;ENSG00000261173_AC018845.3,0	ENSG00000069345_DNAJA2,0;ENSG00000261173_AC018845.3,0			0.00196739	0.186248	Diagnosis	Immature
chr16:47143551-47144451	ENSG00000171208_NETO2,0;ENSG00000260281_ITFG1-AS1,0	ENSG00000171208_NETO2,0;ENSG00000260281_ITFG1-AS1,0			0.0060306	0.230409	Diagnosis	Immature
chr16:50024750-50025642	ENSG00000205423_CNEP1R1,340	ENSG00000205423_CNEP1R1,340			0.00798455	0.243514	Diagnosis	Immature
chr16:50065735-50066546	ENSG00000155393_HEATR3,0;ENSG00000259843_AC007610.1,0	ENSG00000259843_AC007610.1,0;ENSG00000155393_HEATR3,0			0.00081483	0.174388	Diagnosis	Immature
chr16:50152663-50153593	ENSG00000121274_TENT4B,0	ENSG00000121274_TENT4B,0			0.000110873	0.171004	Diagnosis	Immature
chr16:50806058-50806950	ENSG00000261703_LINC02168,0	ENSG00000261703_LINC02168,0			0.00187489	0.184273	Diagnosis	Immature
chr16:51152094-51152843	ENSG00000103449_SALL1,-727;ENSG00000285367_AC087564.1,1324	ENSG00000285367_AC087564.1,1324			0.00222783	0.191659	Diagnosis	Immature
chr16:53099522-53100366		ENSG00000177200_CHD9,44489			0.00773133	0.241215	Diagnosis	Immature
chr16:53434074-53434977	ENSG00000103479_RBL2,97	ENSG00000103479_RBL2,97			0.00706799	0.23824	Diagnosis	Immature
chr16:54546191-54547128		ENSG00000283304_LINC02183,11972			0.00264696	0.196147	Diagnosis	Immature
chr16:56190834-56191760	ENSG00000246379_AC040168.1,0;ENSG00000087258_GNAO1,0	ENSG00000246379_AC040168.1,0;ENSG00000087258_GNAO1,0			0.00390067	0.210573	Diagnosis	Immature
chr16:56317994-56318854		ENSG00000087258_GNAO1,126505			0.00832431	0.244261	Diagnosis	Immature
chr16:56425069-56425887	ENSG00000159461_AMFR,0	ENSG00000159461_AMFR,0			0.0037117	0.209409	Diagnosis	Immature
chr16:56450987-56451911	ENSG00000087263_OGFOD1,0;ENSG00000167005_NUDT21,288	ENSG00000087263_OGFOD1,0;ENSG00000167005_NUDT21,288			0.000798897	0.174388	Diagnosis	Immature
chr16:56546942-56547848					0.00150059	0.182371	Diagnosis	Immature
chr16:57142933-57143775		ENSG00000140848_CPNE2,50350			0.00371962	0.209409	Diagnosis	Immature
chr16:57244698-57245580	ENSG00000260038_AC009090.1,-1770;ENSG00000102931_ARL2BP,0;ENSG00000276663_AC009090.3,816	ENSG00000102931_ARL2BP,0			0.00543557	0.224429	Diagnosis	Immature
chr16:57270213-57271086		ENSG00000102934_PLLP,13586			0.00663248	0.235689	Diagnosis	Immature
chr16:57299542-57300155					0.00557343	0.224869	Diagnosis	Immature
chr16:57627999-57628826		ENSG00000261633_AC018552.3,2821;ENSG00000205336_ADGRG1,17347			0.00818017	0.243792	Diagnosis	Immature
chr16:57735098-57735992	ENSG00000140854_KATNB1,0	ENSG00000140854_KATNB1,0			0.000633713	0.171004	Diagnosis	Immature
chr16:57741608-57742478		ENSG00000140854_KATNB1,5869			0.00779095	0.241813	Diagnosis	Immature
chr16:57802020-57802912		ENSG00000187185_AC092118.1,3834;ENSG00000140859_KIFC3,60141			0.00221004	0.191381	Diagnosis	Immature
chr16:57803104-57803932		ENSG00000187185_AC092118.1,4918;ENSG00000140859_KIFC3,59121			0.00319214	0.201847	Diagnosis	Immature
chr16:57945978-57946854		ENSG00000070729_CNGB1,24274			0.00488205	0.220175	Diagnosis	Immature
chr16:58129018-58129911	ENSG00000070761_CFAP20,0;ENSG00000260927_AC009107.2,0	ENSG00000070761_CFAP20,0;ENSG00000260927_AC009107.2,0			0.000697854	0.171004	Diagnosis	Immature
chr16:58494989-58495760		ENSG00000103034_NDRG4,32143			0.00415319	0.212281	Diagnosis	Immature
chr16:58629665-58630442	ENSG00000125107_CNOT1,0	ENSG00000125107_CNOT1,0			0.00576248	0.227797	Diagnosis	Immature
chr16:62584736-62585654					0.00805295	0.243514	Diagnosis	Immature
chr16:66552087-66552996	ENSG00000166548_TK2,0;ENSG00000217555_CKLF,0	ENSG00000166548_TK2,0;ENSG00000217555_CKLF,0			0.00334212	0.204912	Diagnosis	Immature
chr16:67183432-67184281	ENSG00000196123_KIAA0895L,0	ENSG00000196123_KIAA0895L,0			0.003079	0.200127	Diagnosis	Immature
chr16:67415954-67416839	ENSG00000159714_ZDHHC1,0	ENSG00000159714_ZDHHC1,0			0.00655407	0.235673	Diagnosis	Immature
chr16:67561921-67562698	ENSG00000259804_AC027682.1,0;ENSG00000102974_CTCF,0;ENSG00000261386_AC027682.4,1260	ENSG00000259804_AC027682.1,0;ENSG00000102974_CTCF,0;ENSG00000261386_AC027682.4,1260			0.00587991	0.229398	Diagnosis	Immature
chr16:67806334-67807232	ENSG00000141084_RANBP10,0;ENSG00000102904_TSNAXIP1,0	ENSG00000141084_RANBP10,0;ENSG00000102904_TSNAXIP1,0			0.00891391	0.249374	Diagnosis	Immature
chr16:67841735-67842583	ENSG00000168286_THAP11,0	ENSG00000168286_THAP11,0;ENSG00000102901_CENPT,5228			0.00560502	0.22509	Diagnosis	Immature
chr16:67881971-67882765		ENSG00000038358_EDC4,8919			0.00354778	0.207505	Diagnosis	Immature
chr16:67892845-67893711	ENSG00000159792_PSKH1,0	ENSG00000159792_PSKH1,0			0.000729811	0.171004	Diagnosis	Immature
chr16:67909883-67910789		ENSG00000159792_PSKH1,16629			0.00475776	0.219283	Diagnosis	Immature
chr16:67943801-67944720	ENSG00000213398_LCAT,0	ENSG00000213398_LCAT,0;ENSG00000124067_SLC12A4,24881			0.00610962	0.231401	Diagnosis	Immature
chr16:68084853-68085526	ENSG00000072736_NFATC3,102	ENSG00000072736_NFATC3,102			0.000563573	0.171004	Diagnosis	Immature
chr16:68294025-68294895		ENSG00000103061_SLC7A6OS,16051;ENSG00000103064_SLC7A6,29509			0.00430931	0.212666	Diagnosis	Immature
chr16:69424092-69424994	ENSG00000103018_CYB5B,0	ENSG00000103018_CYB5B,0			0.00560576	0.22509	Diagnosis	Immature
chr16:70381044-70381945	ENSG00000260111_AC012184.1,1587	ENSG00000260111_AC012184.1,1587;ENSG00000157350_ST3GAL2,57292			0.00534476	0.223628	Diagnosis	Immature
chr16:70681266-70682145		ENSG00000132613_MTSS2,3908			0.00242984	0.193625	Diagnosis	Immature
chr16:70685630-70686513	ENSG00000132613_MTSS2,0	ENSG00000132613_MTSS2,0			0.00431368	0.212666	Diagnosis	Immature
chr16:71288964-71289860	ENSG00000180917_CMTR2,0;ENSG00000261260_AC106736.1,189	ENSG00000180917_CMTR2,0;ENSG00000261260_AC106736.1,189			0.00533349	0.223491	Diagnosis	Immature
chr16:71845515-71846418	ENSG00000224470_ATXN1L,0;ENSG00000182149_IST1,0	ENSG00000224470_ATXN1L,0;ENSG00000182149_IST1,0			0.00508931	0.221693	Diagnosis	Immature
chr16:71883768-71884606	ENSG00000261765_AC009127.1,-1495	ENSG00000102984_ZNF821,10730;ENSG00000182149_IST1,37772;ENSG00000224470_ATXN1L,37792			0.00250632	0.194251	Diagnosis	Immature
chr16:72008218-72009136	ENSG00000102967_DHODH,0	ENSG00000102967_DHODH,0			0.000377623	0.171004	Diagnosis	Immature
chr16:74367757-74368596	ENSG00000261079_AC009053.2,295	ENSG00000261079_AC009053.2,295			0.00148531	0.182371	Diagnosis	Immature
chr16:74606696-74607528	ENSG00000090863_GLG1,0	ENSG00000090863_GLG1,0			0.00208302	0.1888	Diagnosis	Immature
chr16:74724454-74725332		ENSG00000103089_FA2H,49499			0.00400456	0.211609	Diagnosis	Immature
chr16:74748372-74749100		ENSG00000103089_FA2H,25731			0.00738048	0.240085	Diagnosis	Immature
chr16:74774354-74775256	ENSG00000103089_FA2H,0	ENSG00000103089_FA2H,0			0.00553537	0.224768	Diagnosis	Immature
chr16:75110834-75111638	ENSG00000247033_AC099508.1,-122	ENSG00000186187_ZNRF1,111810			0.00494761	0.220578	Diagnosis	Immature
chr16:75320181-75321073		ENSG00000153774_CFDP1,112430			0.0089351	0.24967	Diagnosis	Immature
chr16:75516949-75517813					0.000885075	0.174388	Diagnosis	Immature
chr16:75555837-75556690	ENSG00000205084_TMEM231,0;ENSG00000276408_AC025287.2,0	ENSG00000205084_TMEM231,0;ENSG00000276408_AC025287.2,0			0.00601814	0.230409	Diagnosis	Immature
chr16:75622807-75623727	ENSG00000065457_ADAT1,0	ENSG00000065457_ADAT1,0			0.00759222	0.240176	Diagnosis	Immature
chr16:76483182-76484023		ENSG00000152910_CNTNAP4,205904			0.00133496	0.181124	Diagnosis	Immature
chr16:78099148-78099988	ENSG00000186153_WWOX,0	ENSG00000186153_WWOX,0			0.000654253	0.171004	Diagnosis	Immature
chr16:81096007-81096868	ENSG00000140905_GCSH,0	ENSG00000140905_GCSH,0			0.0014031	0.182371	Diagnosis	Immature
chr16:82663827-82664698		ENSG00000140945_CDH13,36862			0.00831878	0.244261	Diagnosis	Immature
chr16:84186586-84187451	ENSG00000103168_TAF1C,0	ENSG00000103168_TAF1C,0			0.00655113	0.235673	Diagnosis	Immature
chr16:84356424-84357301					0.00187264	0.184273	Diagnosis	Immature
chr16:84699617-84700485	ENSG00000103194_USP10,0	ENSG00000103194_USP10,0			0.00397956	0.211609	Diagnosis	Immature
chr16:85291112-85292057		ENSG00000287787_AC092275.1,63909;ENSG00000131149_GSE1,121587			0.00676721	0.237192	Diagnosis	Immature
chr16:85309532-85310428		ENSG00000131149_GSE1,140007			0.00246033	0.193871	Diagnosis	Immature
chr16:85688613-85689525	ENSG00000131153_GINS2,548	ENSG00000131153_GINS2,548			0.00252105	0.194713	Diagnosis	Immature
chr16:85799188-85800083	ENSG00000131148_EMC8,0;ENSG00000131143_COX4I1,555	ENSG00000131148_EMC8,0;ENSG00000131143_COX4I1,555			0.00233718	0.193625	Diagnosis	Immature
chr16:86960054-86960819		ENSG00000287161_AC093519.2,60698			0.000971919	0.176326	Diagnosis	Immature
chr16:87383511-87384343	ENSG00000140941_MAP1LC3B,0	ENSG00000140941_MAP1LC3B,0;ENSG00000103264_FBXO31,7799			0.00689684	0.237674	Diagnosis	Immature
chr16:87387995-87388875		ENSG00000103264_FBXO31,3267;ENSG00000140941_MAP1LC3B,4042			0.00265988	0.196147	Diagnosis	Immature
chr16:88274439-88275303		ENSG00000261273_AC138512.1,39654			0.00797403	0.243514	Diagnosis	Immature
chr16:89171142-89172047	ENSG00000129910_CDH15,0	ENSG00000129910_CDH15,0			0.00664493	0.235689	Diagnosis	Immature
chr16:89723580-89724503		ENSG00000158805_ZNF276,3180			0.00297779	0.199112	Diagnosis	Immature
chr16:89873713-89874528	ENSG00000141002_TCF25,143	ENSG00000141002_TCF25,143			0.00166721	0.184273	Diagnosis	Immature
chr16:89922808-89923696	ENSG00000259006_AC092143.2,-146;ENSG00000258947_TUBB3,1416	ENSG00000258947_TUBB3,1416			0.00661876	0.235689	Diagnosis	Immature
chr16:90022258-90023114		ENSG00000141013_GAS8,2629			0.00597913	0.230265	Diagnosis	Immature
chr17:714491-715402		ENSG00000141252_VPS53,6315			0.00613157	0.23142	Diagnosis	Immature
chr17:996460-997332	ENSG00000177370_TIMM22,0	ENSG00000177370_TIMM22,0			0.00845078	0.244527	Diagnosis	Immature
chr17:1399785-1400584	ENSG00000108953_YWHAE,0	ENSG00000108953_YWHAE,0			0.00406054	0.211827	Diagnosis	Immature
chr17:1455890-1456740		ENSG00000167193_CRK,6422			0.00376949	0.209409	Diagnosis	Immature
chr17:1516298-1517215	ENSG00000132376_INPP5K,0;ENSG00000236618_PITPNA-AS1,0	ENSG00000132376_INPP5K,0;ENSG00000236618_PITPNA-AS1,0			0.000441453	0.171004	Diagnosis	Immature
chr17:1715974-1716858	ENSG00000167716_WDR81,0;ENSG00000186594_MIR22HG,316	ENSG00000167716_WDR81,0;ENSG00000186594_MIR22HG,316			0.00117491	0.177939	Diagnosis	Immature
chr17:1717285-1718047	ENSG00000186594_MIR22HG,-111;ENSG00000167716_WDR81,762	ENSG00000167716_WDR81,762			0.00392336	0.211015	Diagnosis	Immature
chr17:2392392-2393262		ENSG00000070444_MNT,7842			0.00691652	0.237678	Diagnosis	Immature
chr17:2393470-2394359		ENSG00000070444_MNT,6745			0.00257252	0.195293	Diagnosis	Immature
chr17:2401083-2401899	ENSG00000070444_MNT,0	ENSG00000070444_MNT,0			0.00141773	0.182371	Diagnosis	Immature
chr17:3636015-3636894	ENSG00000197417_SHPK,0;ENSG00000040531_CTNS,0	ENSG00000197417_SHPK,0;ENSG00000040531_CTNS,0			0.0082098	0.243792	Diagnosis	Immature
chr17:3845856-3846707	ENSG00000074356_NCBP3,0	ENSG00000074356_NCBP3,0			0.00164777	0.183743	Diagnosis	Immature
chr17:4142725-4143431	ENSG00000074755_ZZEF1,0;ENSG00000167740_CYB5D2,0	ENSG00000074755_ZZEF1,0;ENSG00000167740_CYB5D2,0			0.00187998	0.184273	Diagnosis	Immature
chr17:4263493-4264336	ENSG00000185722_ANKFY1,0	ENSG00000185722_ANKFY1,0			0.00241134	0.193625	Diagnosis	Immature
chr17:4366236-4367158	ENSG00000132388_UBE2G1,0	ENSG00000132388_UBE2G1,0			0.00179245	0.184273	Diagnosis	Immature
chr17:4498376-4499296	ENSG00000183018_SPNS2,0;ENSG00000229782_AC118754.1,378	ENSG00000183018_SPNS2,0;ENSG00000229782_AC118754.1,378			0.000935477	0.176098	Diagnosis	Immature
chr17:4710004-4710893	ENSG00000141480_ARRB2,0	ENSG00000141480_ARRB2,0			0.000160277	0.171004	Diagnosis	Immature
chr17:4731076-4731975	ENSG00000161920_MED11,0;ENSG00000261898_AC091153.4,396	ENSG00000161920_MED11,0;ENSG00000261898_AC091153.4,396			0.000712085	0.171004	Diagnosis	Immature
chr17:4806596-4807517	ENSG00000262165_AC233723.1,0;ENSG00000129219_PLD2,0	ENSG00000262165_AC233723.1,0;ENSG00000129219_PLD2,0			0.00601424	0.230409	Diagnosis	Immature
chr17:4832953-4833818	ENSG00000141503_MINK1,0	ENSG00000141503_MINK1,0			0.00323652	0.202248	Diagnosis	Immature
chr17:4948351-4949222	ENSG00000108518_PFN1,0;ENSG00000108515_ENO3,259	ENSG00000108518_PFN1,0;ENSG00000108515_ENO3,259			0.00266261	0.196147	Diagnosis	Immature
chr17:4967134-4967999	ENSG00000091640_SPAG7,0;ENSG00000262429_AC004771.4,0	ENSG00000091640_SPAG7,0;ENSG00000262429_AC004771.4,0;ENSG00000108509_CAMTA2,19676			0.000202112	0.171004	Diagnosis	Immature
chr17:5281931-5282860	ENSG00000029725_RABEP1,0	ENSG00000029725_RABEP1,0			0.00284786	0.196728	Diagnosis	Immature
chr17:5419435-5420310	ENSG00000129197_RPAIN,0;ENSG00000108559_NUP88,0	ENSG00000108559_NUP88,0;ENSG00000129197_RPAIN,0			0.00504723	0.221192	Diagnosis	Immature
chr17:5468507-5469389	ENSG00000005100_DHX33,0;ENSG00000262099_DHX33-DT,0	ENSG00000005100_DHX33,0;ENSG00000262099_DHX33-DT,0			0.00446439	0.21447	Diagnosis	Immature
chr17:5486014-5486892	ENSG00000167842_MIS12,0;ENSG00000072849_DERL2,0	ENSG00000072849_DERL2,0;ENSG00000167842_MIS12,0			0.000504401	0.171004	Diagnosis	Immature
chr17:6084046-6084907		ENSG00000179314_WSCD1,26239			0.00492359	0.220175	Diagnosis	Immature
chr17:6651265-6652153	ENSG00000108590_MED31,0;ENSG00000256806_C17orf100,0	ENSG00000108590_MED31,0;ENSG00000256806_C17orf100,0			0.00396933	0.211609	Diagnosis	Immature
chr17:7204687-7205543		ENSG00000132535_DLG4,14298			0.00338287	0.205115	Diagnosis	Immature
chr17:7214305-7214828		ENSG00000132535_DLG4,5013			0.00620528	0.232296	Diagnosis	Immature
chr17:7234046-7234945	ENSG00000004975_DVL2,0	ENSG00000004975_DVL2,0			0.00242194	0.193625	Diagnosis	Immature
chr17:7239176-7240082	ENSG00000040633_PHF23,0	ENSG00000040633_PHF23,0;ENSG00000170296_GABARAP,2367			0.000812416	0.174388	Diagnosis	Immature
chr17:7251689-7252555	ENSG00000175826_CTDNEP1,0;ENSG00000170291_ELP5,273	ENSG00000175826_CTDNEP1,0;ENSG00000170291_ELP5,273			0.00346484	0.20564	Diagnosis	Immature
chr17:7329057-7329906	ENSG00000215041_NEURL4,0	ENSG00000215041_NEURL4,0			0.000877278	0.174388	Diagnosis	Immature
chr17:7351529-7352406	ENSG00000213859_KCTD11,0	ENSG00000213859_KCTD11,0			0.00102321	0.176647	Diagnosis	Immature
chr17:7403975-7404764	ENSG00000169992_NLGN2,-110;ENSG00000205544_TMEM256,0	ENSG00000205544_TMEM256,0			0.00064935	0.171004	Diagnosis	Immature
chr17:7434913-7435784	ENSG00000181284_TMEM102,0;ENSG00000262624_AC113189.1,1739	ENSG00000181284_TMEM102,0			0.00511281	0.221829	Diagnosis	Immature
chr17:7479193-7479961	ENSG00000259224_SLC35G6,-1371	ENSG00000174282_ZBTB4,4302			0.00179243	0.184273	Diagnosis	Immature
chr17:7484258-7484942	ENSG00000174282_ZBTB4,0;ENSG00000181222_POLR2A,0	ENSG00000174282_ZBTB4,0;ENSG00000181222_POLR2A,0			0.000139114	0.171004	Diagnosis	Immature
chr17:7583363-7584290	ENSG00000129255_MPDU1,0;ENSG00000233223_AC016876.1,0	ENSG00000233223_AC016876.1,0;ENSG00000129255_MPDU1,0			0.000794206	0.174388	Diagnosis	Immature
chr17:7685834-7686766	ENSG00000141499_WRAP53,0;ENSG00000141510_TP53,784	ENSG00000141499_WRAP53,0;ENSG00000141510_TP53,784			0.00730047	0.239533	Diagnosis	Immature
chr17:7841597-7842393	ENSG00000132510_KDM6B,1693	ENSG00000132510_KDM6B,1693			0.00249584	0.193923	Diagnosis	Immature
chr17:7844477-7845389		ENSG00000132510_KDM6B,4573			0.00119143	0.177939	Diagnosis	Immature
chr17:7851442-7852362		ENSG00000132510_KDM6B,11538			0.00391641	0.210947	Diagnosis	Immature
chr17:8138498-8139422					0.00110615	0.17692	Diagnosis	Immature
chr17:8156162-8157079	ENSG00000179094_PER1,0	ENSG00000179094_PER1,0			0.000214542	0.171004	Diagnosis	Immature
chr17:8187438-8188141					0.00758281	0.240176	Diagnosis	Immature
chr17:8376227-8377097	ENSG00000184619_KRBA2,0	ENSG00000184619_KRBA2,0;ENSG00000265749_AC135178.4,10664			0.00601113	0.230409	Diagnosis	Immature
chr17:8382985-8383931	ENSG00000161970_RPL26,0	ENSG00000161970_RPL26,0			0.00505462	0.221192	Diagnosis	Immature
chr17:8435483-8436353		ENSG00000166579_NDEL1,22352			0.000267482	0.171004	Diagnosis	Immature
chr17:9474991-9475897		ENSG00000170310_STX8,100694			0.00235636	0.193625	Diagnosis	Immature
chr17:9802273-9803103		ENSG00000214978_GSG1L2,18968;ENSG00000282882_AC027045.2,38087			0.00754542	0.240176	Diagnosis	Immature
chr17:10036417-10037339		ENSG00000007237_GAS7,161212			0.00432122	0.212666	Diagnosis	Immature
chr17:10123604-10124486		ENSG00000007237_GAS7,74065			0.00304476	0.199862	Diagnosis	Immature
chr17:10697143-10698066	ENSG00000170222_ADPRM,0;ENSG00000133028_SCO1,309	ENSG00000170222_ADPRM,0;ENSG00000133028_SCO1,309			0.00664642	0.235689	Diagnosis	Immature
chr17:11598135-11598914	ENSG00000007174_DNAH9,0	ENSG00000007174_DNAH9,0			0.00207866	0.1888	Diagnosis	Immature
chr17:11997032-11997930	ENSG00000154957_ZNF18,0	ENSG00000154957_ZNF18,0			0.0060399	0.230409	Diagnosis	Immature
chr17:12020436-12021280	ENSG00000065559_MAP2K4,0	ENSG00000065559_MAP2K4,0			0.000971625	0.176326	Diagnosis	Immature
chr17:15231568-15232492		ENSG00000109099_PMP22,32834			0.0016843	0.184273	Diagnosis	Immature
chr17:15260503-15261339	ENSG00000265445_AC005703.3,0	ENSG00000265445_AC005703.3,0;ENSG00000109099_PMP22,3987			0.00879868	0.247991	Diagnosis	Immature
chr17:16215127-16215975	ENSG00000108474_PIGL,-1216	ENSG00000141027_NCOR1,2210			0.0081389	0.243514	Diagnosis	Immature
chr17:16352984-16353818	ENSG00000166582_CENPV,0	ENSG00000166582_CENPV,0			0.00234497	0.193625	Diagnosis	Immature
chr17:16380506-16381381	ENSG00000170315_UBB,0;ENSG00000265401_AC093484.3,1288	ENSG00000170315_UBB,0			0.00179503	0.184273	Diagnosis	Immature
chr17:17236890-17237762	ENSG00000266498_AC055811.3,-772;ENSG00000154803_FLCN,0	ENSG00000154803_FLCN,0			0.00811106	0.243514	Diagnosis	Immature
chr17:17302994-17303872	ENSG00000205309_NT5M,0	ENSG00000205309_NT5M,0			0.00379765	0.209425	Diagnosis	Immature
chr17:17681029-17681873	ENSG00000108557_RAI1,0	ENSG00000108557_RAI1,0			0.00447038	0.21447	Diagnosis	Immature
chr17:17792531-17793341		ENSG00000108557_RAI1,111073			0.00623534	0.232369	Diagnosis	Immature
chr17:17836007-17836817	ENSG00000072310_SREBF1,194	ENSG00000072310_SREBF1,194			0.000418552	0.171004	Diagnosis	Immature
chr17:17839895-17840721					0.00699287	0.237986	Diagnosis	Immature
chr17:18183003-18183897	ENSG00000091542_ALKBH5,0;ENSG00000266677_AC087164.1,856	ENSG00000091542_ALKBH5,0;ENSG00000266677_AC087164.1,856			7.14822e-05	0.171004	Diagnosis	Immature
chr17:19362352-19363231	ENSG00000286799_AC124066.1,0	ENSG00000286799_AC124066.1,0;ENSG00000108641_B9D1,14962			0.00873801	0.247083	Diagnosis	Immature
chr17:19377841-19378687	ENSG00000108641_B9D1,0;ENSG00000166484_MAPK7,120	ENSG00000108641_B9D1,0;ENSG00000166484_MAPK7,120			0.00634332	0.23336	Diagnosis	Immature
chr17:19410629-19411489	ENSG00000128482_RNF112,0;ENSG00000265126_AC004448.3,1629	ENSG00000128482_RNF112,0			0.00897959	0.24992	Diagnosis	Immature
chr17:19648247-19649122	ENSG00000072210_ALDH3A2,111;ENSG00000264932_AC115989.1,813	ENSG00000072210_ALDH3A2,111			0.000619032	0.171004	Diagnosis	Immature
chr17:19977453-19978393	ENSG00000108599_AKAP10,0	ENSG00000108599_AKAP10,0			0.00857435	0.245483	Diagnosis	Immature
chr17:20008950-20009795	ENSG00000261033_AC005730.2,0;ENSG00000128487_SPECC1,0	ENSG00000261033_AC005730.2,0;ENSG00000128487_SPECC1,0			0.0034106	0.205115	Diagnosis	Immature
chr17:20908208-20909105		ENSG00000233098_CCDC144NL-AS1,39775			0.00479439	0.219702	Diagnosis	Immature
chr17:21042866-21043792	ENSG00000124422_USP22,0	ENSG00000124422_USP22,0			0.00095285	0.176326	Diagnosis	Immature
chr17:21126562-21127451		ENSG00000109016_DHRS7B,3198			0.00610436	0.231391	Diagnosis	Immature
chr17:21988324-21989172					0.00655466	0.235673	Diagnosis	Immature
chr17:22523998-22524890	ENSG00000243655_AC132825.2,440;ENSG00000256618_MTRNR2L1,887	ENSG00000243655_AC132825.2,440;ENSG00000256618_MTRNR2L1,887			8.4308e-05	0.171004	Diagnosis	Immature
chr17:27293753-27294569	ENSG00000109046_WSB1,0	ENSG00000109046_WSB1,0			0.00187385	0.184273	Diagnosis	Immature
chr17:27353450-27354369					0.00571235	0.226747	Diagnosis	Immature
chr17:27455833-27456779	ENSG00000141068_KSR1,0	ENSG00000141068_KSR1,0			0.00235193	0.193625	Diagnosis	Immature
chr17:27993059-27993973	ENSG00000260019_LINC01992,-1272				0.00552371	0.224691	Diagnosis	Immature
chr17:28041080-28041945	ENSG00000087095_NLK,0	ENSG00000087095_NLK,0			0.00193355	0.18609	Diagnosis	Immature
chr17:28405589-28406482	ENSG00000265254_AC015917.2,349;ENSG00000076351_SLC46A1,715	ENSG00000265254_AC015917.2,349;ENSG00000076351_SLC46A1,715			0.00815503	0.243541	Diagnosis	Immature
chr17:28552175-28553031	ENSG00000109103_UNC119,0	ENSG00000109103_UNC119,0;ENSG00000258472_AC005726.1,61166			0.00544874	0.224691	Diagnosis	Immature
chr17:28598749-28599582	ENSG00000227543_SPAG5-AS1,0;ENSG00000076382_SPAG5,0	ENSG00000076382_SPAG5,0;ENSG00000227543_SPAG5-AS1,0;ENSG00000258472_AC005726.1,14615			0.00182217	0.184273	Diagnosis	Immature
chr17:28644781-28645683	ENSG00000007202_KIAA0100,0	ENSG00000007202_KIAA0100,0			0.000854794	0.174388	Diagnosis	Immature
chr17:28710919-28711822	ENSG00000167525_PROCA1,32	ENSG00000167525_PROCA1,32			0.00224642	0.192513	Diagnosis	Immature
chr17:28952080-28952850	ENSG00000109118_PHF12,-309;ENSG00000179761_PIPOX,1567	ENSG00000179761_PIPOX,1567			0.00386334	0.210077	Diagnosis	Immature
chr17:29615216-29616128		ENSG00000167549_CORO6,6779;ENSG00000264031_ABHD15-AS1,54669			0.000561828	0.171004	Diagnosis	Immature
chr17:30378474-30379362	ENSG00000108582_CPD,0	ENSG00000108582_CPD,0			0.000524856	0.171004	Diagnosis	Immature
chr17:30476932-30477846	ENSG00000108587_GOSR1,0	ENSG00000108587_GOSR1,0			0.00300944	0.199762	Diagnosis	Immature
chr17:30708471-30709323					0.00196907	0.186248	Diagnosis	Immature
chr17:30831497-30832417	ENSG00000176208_ATAD5,0	ENSG00000176208_ATAD5,0			0.00887831	0.248821	Diagnosis	Immature
chr17:31549520-31550398					0.00800843	0.243514	Diagnosis	Immature
chr17:32876724-32877555	ENSG00000226377_AC084809.1,0;ENSG00000176658_MYO1D,0	ENSG00000176658_MYO1D,0;ENSG00000226377_AC084809.1,0			0.00148036	0.182371	Diagnosis	Immature
chr17:32927539-32928420	ENSG00000006042_TMEM98,0	ENSG00000006042_TMEM98,0			0.00700037	0.237986	Diagnosis	Immature
chr17:34170988-34171878		ENSG00000108684_ASIC2,3086;ENSG00000261156_LINC01989,24059			0.00893601	0.24967	Diagnosis	Immature
chr17:35088890-35089752	ENSG00000092871_RFFL,0	ENSG00000092871_RFFL,0			0.00683045	0.237491	Diagnosis	Immature
chr17:35763975-35764812		ENSG00000270806_C17orf50,3088;ENSG00000271447_MMP28,30895;ENSG00000270647_TAF15,50184			0.00725058	0.239479	Diagnosis	Immature
chr17:36534935-36535739	ENSG00000277161_PIGW,0	ENSG00000277161_PIGW,0;ENSG00000278259_MYO19,7696			0.00803405	0.243514	Diagnosis	Immature
chr17:37609017-37609892	ENSG00000275066_SYNRG,0;ENSG00000277688_AC243585.2,0	ENSG00000275066_SYNRG,0;ENSG00000277688_AC243585.2,0;ENSG00000278053_DDX52,33554			0.00130025	0.181017	Diagnosis	Immature
chr17:38431427-38432262		ENSG00000275832_ARHGAP23,12147			0.00520151	0.222792	Diagnosis	Immature
chr17:38557968-38558818		ENSG00000277363_SRCIN1,47134			0.00821982	0.243792	Diagnosis	Immature
chr17:38752234-38753022	ENSG00000277791_PSMB3,0	ENSG00000277791_PSMB3,0			0.00104422	0.176647	Diagnosis	Immature
chr17:38799279-38800214	ENSG00000276293_PIP4K2B,0	ENSG00000276293_PIP4K2B,0			0.00471373	0.218591	Diagnosis	Immature
chr17:38824852-38825788	ENSG00000273559_CWC25,0	ENSG00000273559_CWC25,0			0.00230452	0.193625	Diagnosis	Immature
chr17:38853322-38854260	ENSG00000125691_RPL23,0	ENSG00000125691_RPL23,0			0.0016876	0.184273	Diagnosis	Immature
chr17:38869426-38870221	ENSG00000002834_LASP1,0	ENSG00000002834_LASP1,0			0.00374655	0.209409	Diagnosis	Immature
chr17:39402192-39402911	ENSG00000108306_FBXL20,0;ENSG00000266469_AC005288.1,399	ENSG00000108306_FBXL20,0;ENSG00000266469_AC005288.1,399			0.00405048	0.211609	Diagnosis	Immature
chr17:39461109-39461955	ENSG00000167258_CDK12,0	ENSG00000167258_CDK12,0			0.00128675	0.180672	Diagnosis	Immature
chr17:39687533-39688424	ENSG00000141736_ERBB2,0	ENSG00000141736_ERBB2,0;ENSG00000161395_PGAP3,8373			0.00666203	0.235866	Diagnosis	Immature
chr17:39980186-39981104	ENSG00000108344_PSMD3,0	ENSG00000108344_PSMD3,0			0.00347114	0.20564	Diagnosis	Immature
chr17:40068658-40069554		ENSG00000126351_THRA,10368			0.00538055	0.223983	Diagnosis	Immature
chr17:40071927-40072825		ENSG00000126351_THRA,13637			0.00486938	0.220175	Diagnosis	Immature
chr17:40100311-40101166	ENSG00000126368_NR1D1,0	ENSG00000126368_NR1D1,0			0.00247728	0.193871	Diagnosis	Immature
chr17:40107891-40108767					0.00212466	0.190152	Diagnosis	Immature
chr17:40112927-40113847					0.00674931	0.237142	Diagnosis	Immature
chr17:40139913-40140769	ENSG00000108349_CASC3,0	ENSG00000108349_CASC3,0			0.0012386	0.179545	Diagnosis	Immature
chr17:41665585-41666445					0.00294611	0.198734	Diagnosis	Immature
chr17:41688920-41689526	ENSG00000173812_EIF1,35	ENSG00000173812_EIF1,35			0.00177021	0.184273	Diagnosis	Immature
chr17:41786374-41787260	ENSG00000173801_JUP,0	ENSG00000173801_JUP,0			0.000678901	0.171004	Diagnosis	Immature
chr17:41864959-41865757	ENSG00000274630_AC125257.2,-1824;ENSG00000178502_KLHL11,0	ENSG00000178502_KLHL11,0			0.00172822	0.184273	Diagnosis	Immature
chr17:41930069-41930989	ENSG00000131473_ACLY,0;ENSG00000204815_TTC25,0	ENSG00000131473_ACLY,0;ENSG00000204815_TTC25,0			0.00331141	0.204188	Diagnosis	Immature
chr17:42183794-42184713	ENSG00000161610_HCRT,739	ENSG00000161610_HCRT,739			0.00783391	0.242223	Diagnosis	Immature
chr17:42275907-42276826	ENSG00000278829_AC099811.5,-336;ENSG00000173757_STAT5B,0	ENSG00000173757_STAT5B,0			0.00482456	0.22009	Diagnosis	Immature
chr17:42554339-42555249	ENSG00000266962_AC067852.2,0	ENSG00000266962_AC067852.2,0;ENSG00000108786_HSD17B1,5125			0.00432172	0.212666	Diagnosis	Immature
chr17:42609037-42609947	ENSG00000131462_TUBG1,0;ENSG00000141699_RETREG3,676	ENSG00000131462_TUBG1,0;ENSG00000141699_RETREG3,676			0.00622229	0.232369	Diagnosis	Immature
chr17:42682321-42683178	ENSG00000108797_CNTNAP1,0;ENSG00000184451_CCR10,739	ENSG00000108797_CNTNAP1,0;ENSG00000184451_CCR10,739			0.00658765	0.235673	Diagnosis	Immature
chr17:42832851-42833797	ENSG00000126581_BECN1,0	ENSG00000126581_BECN1,0;ENSG00000131467_PSME3,8466			0.00409491	0.212027	Diagnosis	Immature
chr17:42901397-42902317	ENSG00000131482_G6PC,600	ENSG00000131482_G6PC,600			0.000701254	0.171004	Diagnosis	Immature
chr17:43035959-43036833					0.00830534	0.244261	Diagnosis	Immature
chr17:43169955-43170625	ENSG00000012048_BRCA1,0;ENSG00000188554_NBR1,0;ENSG00000267002_AC060780.1,412	ENSG00000012048_BRCA1,0;ENSG00000188554_NBR1,0;ENSG00000267002_AC060780.1,412			0.00488551	0.220175	Diagnosis	Immature
chr17:43170748-43171483	ENSG00000012048_BRCA1,-503;ENSG00000267002_AC060780.1,0;ENSG00000188554_NBR1,267	ENSG00000267002_AC060780.1,0;ENSG00000188554_NBR1,267			0.00113094	0.17692	Diagnosis	Immature
chr17:43315219-43316155					0.00486651	0.220175	Diagnosis	Immature
chr17:43388132-43388967	ENSG00000188825_LINC00910,232	ENSG00000188825_LINC00910,232			0.00181653	0.184273	Diagnosis	Immature
chr17:43546021-43546866		ENSG00000175832_ETV4,32754;ENSG00000067596_DHX8,62156			0.00526737	0.223054	Diagnosis	Immature
chr17:44110819-44111731		ENSG00000108840_HDAC5,11971			0.00231324	0.193625	Diagnosis	Immature
chr17:44141434-44142334	ENSG00000125319_C17orf53,0	ENSG00000125319_C17orf53,0			0.00809491	0.243514	Diagnosis	Immature
chr17:44186419-44187297	ENSG00000267080_ASB16-AS1,0;ENSG00000168591_TMUB2,0	ENSG00000267080_ASB16-AS1,0;ENSG00000168591_TMUB2,0			0.00354986	0.207505	Diagnosis	Immature
chr17:44199720-44200584	ENSG00000087152_ATXN7L3,0;ENSG00000267394_AC004596.1,838	ENSG00000087152_ATXN7L3,0;ENSG00000267394_AC004596.1,838			0.00266893	0.196147	Diagnosis	Immature
chr17:44308077-44308904	ENSG00000108309_RUNDC3A,0	ENSG00000108309_RUNDC3A,0;ENSG00000267750_RUNDC3A-AS1,6411			0.00772983	0.241215	Diagnosis	Immature
chr17:44363368-44364196	ENSG00000161682_FAM171A2,0	ENSG00000161682_FAM171A2,0			0.00434963	0.21268	Diagnosis	Immature
chr17:44689369-44690289	ENSG00000180329_CCDC43,0	ENSG00000180329_CCDC43,0;ENSG00000180336_MEIOC,32965			0.00840181	0.244479	Diagnosis	Immature
chr17:45135146-45136011	ENSG00000161714_PLCD3,-1792	ENSG00000181513_ACBD4,2546			0.00646468	0.234638	Diagnosis	Immature
chr17:45147993-45148855	ENSG00000276728_AC142472.1,0;ENSG00000186834_HEXIM1,0	ENSG00000276728_AC142472.1,0;ENSG00000186834_HEXIM1,0			0.000124486	0.171004	Diagnosis	Immature
chr17:45161269-45162099	ENSG00000224505_AC138150.1,0;ENSG00000168517_HEXIM2,569	ENSG00000224505_AC138150.1,0;ENSG00000168517_HEXIM2,569			0.000197141	0.171004	Diagnosis	Immature
chr17:45172336-45173256	ENSG00000267288_AC138150.2,-752				0.00716632	0.23926	Diagnosis	Immature
chr17:47650363-47651155	ENSG00000263766_AC025682.1,-943;ENSG00000108424_KPNB1,887	ENSG00000108424_KPNB1,887			0.00156847	0.182746	Diagnosis	Immature
chr17:47895715-47896638	ENSG00000264920_AC018521.5,0;ENSG00000167182_SP2,0	ENSG00000264920_AC018521.5,0;ENSG00000167182_SP2,0			0.00213227	0.190325	Diagnosis	Immature
chr17:47970515-47971424		ENSG00000108465_CDK5RAP3,2705			0.00313388	0.200884	Diagnosis	Immature
chr17:47992907-47993827		ENSG00000264701_AC018521.4,2369			0.00744206	0.240135	Diagnosis	Immature
chr17:48024852-48025729					0.00551008	0.224691	Diagnosis	Immature
chr17:48892122-48893056	ENSG00000159199_ATP5MC1,0	ENSG00000159199_ATP5MC1,0			0.000135359	0.171004	Diagnosis	Immature
chr17:48907979-48908848	ENSG00000159202_UBE2Z,0	ENSG00000159202_UBE2Z,0			0.000784646	0.174388	Diagnosis	Immature
chr17:49788751-49789439	ENSG00000121104_FAM117A,0;ENSG00000136504_KAT7,70	ENSG00000121104_FAM117A,0;ENSG00000136504_KAT7,70			0.000584931	0.171004	Diagnosis	Immature
chr17:50055697-50056472	ENSG00000246640_PICART1,0;ENSG00000005884_ITGA3,0	ENSG00000246640_PICART1,0;ENSG00000005884_ITGA3,0			0.00631541	0.233106	Diagnosis	Immature
chr17:50372616-50373522	ENSG00000108826_MRPL27,0;ENSG00000154920_EME1,0	ENSG00000108826_MRPL27,0;ENSG00000154920_EME1,0			0.00850482	0.244964	Diagnosis	Immature
chr17:50541681-50542605	ENSG00000006282_SPATA20,-453	ENSG00000049283_EPN3,8999			0.00158631	0.182746	Diagnosis	Immature
chr17:50560191-50561090	ENSG00000006283_CACNA1G,0;ENSG00000250107_CACNA1G-AS1,1018	ENSG00000006283_CACNA1G,0;ENSG00000250107_CACNA1G-AS1,1018			0.000305084	0.171004	Diagnosis	Immature
chr17:50866017-50866925	ENSG00000229980_TOB1-AS1,0;ENSG00000141232_TOB1,1053	ENSG00000229980_TOB1-AS1,0;ENSG00000141232_TOB1,1053			0.000208226	0.171004	Diagnosis	Immature
chr17:50867364-50868153	ENSG00000141232_TOB1,0;ENSG00000229980_TOB1-AS1,685	ENSG00000141232_TOB1,0;ENSG00000229980_TOB1-AS1,685			0.00415591	0.212281	Diagnosis	Immature
chr17:50944234-50945059	ENSG00000247011_AC005920.1,0;ENSG00000251665_AC005920.3,130	ENSG00000247011_AC005920.1,0;ENSG00000251665_AC005920.3,130			0.0037171	0.209409	Diagnosis	Immature
chr17:51035219-51036108		ENSG00000008294_SPAG9,84760			0.00899807	0.249934	Diagnosis	Immature
chr17:51166103-51166943	ENSG00000243678_NME2,668	ENSG00000243678_NME2,668			0.00300048	0.199738	Diagnosis	Immature
chr17:54900309-54901211	ENSG00000141198_TOM1L1,922	ENSG00000141198_TOM1L1,922			0.00810566	0.243514	Diagnosis	Immature
chr17:55454897-55455669		ENSG00000261873_SMIM36,55775			0.00739438	0.240111	Diagnosis	Immature
chr17:56977618-56978527	ENSG00000121064_SCPEP1,0	ENSG00000121064_SCPEP1,0			0.00199254	0.186503	Diagnosis	Immature
chr17:57928947-57929806		ENSG00000180891_CUEDC1,25606			0.00870921	0.247007	Diagnosis	Immature
chr17:57935332-57936118		ENSG00000180891_CUEDC1,19294			0.00834846	0.244261	Diagnosis	Immature
chr17:57954914-57955751	ENSG00000278642_AC015813.4,-214;ENSG00000180891_CUEDC1,0	ENSG00000180891_CUEDC1,0			0.00362203	0.208274	Diagnosis	Immature
chr17:58007050-58007920	ENSG00000136450_SRSF1,0	ENSG00000136450_SRSF1,0			0.00152596	0.182746	Diagnosis	Immature
chr17:58351880-58352786	ENSG00000213246_SUPT4H1,307	ENSG00000213246_SUPT4H1,307;ENSG00000265148_TSPOAP1-AS1,27408;ENSG00000108375_RNF43,64809			0.00663106	0.235689	Diagnosis	Immature
chr17:58531579-58532482		ENSG00000264672_SEPTIN4-AS1,11742;ENSG00000108387_SEPTIN4,11886			0.00312635	0.200884	Diagnosis	Immature
chr17:58631473-58632383		ENSG00000121101_TEX14,59672			0.00430691	0.212666	Diagnosis	Immature
chr17:59106478-59107321	ENSG00000224738_AC099850.1,0;ENSG00000108395_TRIM37,0	ENSG00000108395_TRIM37,0;ENSG00000224738_AC099850.1,0			0.000733509	0.17116	Diagnosis	Immature
chr17:59154973-59155843	ENSG00000182628_SKA2,0;ENSG00000068489_PRR11,0	ENSG00000182628_SKA2,0;ENSG00000068489_PRR11,0			0.00354837	0.207505	Diagnosis	Immature
chr17:59619165-59619982	ENSG00000141367_CLTC,0;ENSG00000273702_AC091271.1,0	ENSG00000273702_AC091271.1,0;ENSG00000141367_CLTC,0			0.00761458	0.240176	Diagnosis	Immature
chr17:63842512-63843400	ENSG00000108604_SMARCD2,0	ENSG00000108604_SMARCD2,0			0.00246062	0.193871	Diagnosis	Immature
chr17:63848707-63849638					0.00511144	0.221829	Diagnosis	Immature
chr17:64129761-64130657	ENSG00000178607_ERN1,162	ENSG00000178607_ERN1,162			0.00225773	0.193172	Diagnosis	Immature
chr17:64145490-64146357	ENSG00000266402_SNHG25,0	ENSG00000266402_SNHG25,0			0.00798579	0.243514	Diagnosis	Immature
chr17:64262865-64263734	ENSG00000136478_TEX2,0	ENSG00000136478_TEX2,0			0.00161517	0.182886	Diagnosis	Immature
chr17:64496610-64497536	ENSG00000256525_POLG2,0	ENSG00000256525_POLG2,0			0.00486574	0.220175	Diagnosis	Immature
chr17:64661852-64662699	ENSG00000108854_SMURF2,0	ENSG00000108854_SMURF2,0			0.00812021	0.243514	Diagnosis	Immature
chr17:64919078-64919949	ENSG00000176809_LRRC37A3,0	ENSG00000176809_LRRC37A3,0			0.00899199	0.24992	Diagnosis	Immature
chr17:65122836-65123755		ENSG00000108370_RGS9,22024			0.00556606	0.224869	Diagnosis	Immature
chr17:65561146-65561957	ENSG00000168646_AXIN2,0	ENSG00000168646_AXIN2,0			0.00833959	0.244261	Diagnosis	Immature
chr17:66539898-66540795		ENSG00000154229_PRKCA,237285			0.00263345	0.1959	Diagnosis	Immature
chr17:67993227-67994122		ENSG00000186665_C17orf58,2309			0.00441999	0.213543	Diagnosis	Immature
chr17:68511982-68512747	ENSG00000108946_PRKAR1A,202	ENSG00000108946_PRKAR1A,202;ENSG00000267009_AC007780.1,98359			0.00771845	0.241215	Diagnosis	Immature
chr17:69326761-69327670	ENSG00000154265_ABCA5,0	ENSG00000154265_ABCA5,0			0.0019412	0.186248	Diagnosis	Immature
chr17:74049554-74050325		ENSG00000266357_LINC02074,103887			0.00743129	0.240131	Diagnosis	Immature
chr17:74245250-74246190		ENSG00000141540_TTYH2,31679			0.00540756	0.22417	Diagnosis	Immature
chr17:74514115-74514954					0.00154379	0.182746	Diagnosis	Immature
chr17:74775959-74776880	ENSG00000109065_NAT9,0;ENSG00000109066_TMEM104,0	ENSG00000109065_NAT9,0;ENSG00000109066_TMEM104,0			0.00412499	0.212281	Diagnosis	Immature
chr17:74872725-74873618	ENSG00000161513_FDXR,0	ENSG00000161513_FDXR,0			0.00738004	0.240085	Diagnosis	Immature
chr17:74981881-74982772					0.00616787	0.231627	Diagnosis	Immature
chr17:75033542-75034198	ENSG00000180901_KCTD2,967	ENSG00000180901_KCTD2,967			0.00491981	0.220175	Diagnosis	Immature
chr17:75046607-75047509	ENSG00000167863_ATP5PD,0	ENSG00000167863_ATP5PD,0;ENSG00000180901_KCTD2,14032			0.00882617	0.248249	Diagnosis	Immature
chr17:75405277-75406169	ENSG00000177885_GRB2,0	ENSG00000177885_GRB2,0			0.000272193	0.171004	Diagnosis	Immature
chr17:75456115-75456998		ENSG00000177728_TMEM94,14956			0.000969225	0.176326	Diagnosis	Immature
chr17:75588873-75589790	ENSG00000266714_MYO15B,815	ENSG00000266714_MYO15B,815			0.00280767	0.196728	Diagnosis	Immature
chr17:75784388-75785291	ENSG00000132478_UNK,0;ENSG00000132475_H3F3B,602	ENSG00000132478_UNK,0;ENSG00000132475_H3F3B,602			0.00550528	0.224691	Diagnosis	Immature
chr17:75904556-75905453	ENSG00000204316_MRPL38,0	ENSG00000204316_MRPL38,0			0.00544317	0.224569	Diagnosis	Immature
chr17:76264717-76265624	ENSG00000185262_UBALD2,0	ENSG00000185262_UBALD2,0			0.00565723	0.225962	Diagnosis	Immature
chr17:76353491-76354405		ENSG00000161542_PRPSAP1,30116			0.00143884	0.182371	Diagnosis	Immature
chr17:76544003-76544899		ENSG00000161544_CYGB,6276;ENSG00000214140_PRCD,16417			0.00761635	0.240176	Diagnosis	Immature
chr17:76671335-76672234	ENSG00000261335_AC005837.1,0	ENSG00000261335_AC005837.1,0			0.00372238	0.209409	Diagnosis	Immature
chr17:76726228-76727142	ENSG00000070495_JMJD6,0;ENSG00000181038_METTL23,0	ENSG00000070495_JMJD6,0;ENSG00000181038_METTL23,0			0.00591992	0.229856	Diagnosis	Immature
chr17:76737177-76737955	ENSG00000161547_SRSF2,0;ENSG00000092931_MFSD11,1312	ENSG00000161547_SRSF2,0;ENSG00000092931_MFSD11,1312			0.00215939	0.191114	Diagnosis	Immature
chr17:77088234-77089163	ENSG00000129657_SEC14L1,0;ENSG00000234912_SNHG20,1518	ENSG00000129657_SEC14L1,0;ENSG00000234912_SNHG20,1518			0.00660413	0.235689	Diagnosis	Immature
chr17:77140270-77141202		ENSG00000129657_SEC14L1,51521			0.000152467	0.171004	Diagnosis	Immature
chr17:77372729-77373577		ENSG00000184640_SEPTIN9,92160			0.00489128	0.220175	Diagnosis	Immature
chr17:77451177-77451936		ENSG00000184640_SEPTIN9,170608			0.00556143	0.224869	Diagnosis	Immature
chr17:77942110-77942997					0.00249955	0.193997	Diagnosis	Immature
chr17:78112373-78113274	ENSG00000204282_TNRC6C-AS1,-574	ENSG00000141524_TMC6,19133			0.00281186	0.196728	Diagnosis	Immature
chr17:78237274-78238038		ENSG00000204278_TMEM235,5964			0.00342138	0.205115	Diagnosis	Immature
chr17:78241258-78242136					0.00254823	0.195097	Diagnosis	Immature
chr17:78315393-78316106	ENSG00000267737_AC087645.2,0	ENSG00000267737_AC087645.2,0			0.00613058	0.23142	Diagnosis	Immature
chr17:78341527-78342423		ENSG00000267737_AC087645.2,25798			0.00662089	0.235689	Diagnosis	Immature
chr17:78352629-78353484					0.00720206	0.239479	Diagnosis	Immature
chr17:78458487-78459391		ENSG00000187775_DNAH17,118003			0.00283177	0.196728	Diagnosis	Immature
chr17:79074450-79075315	ENSG00000167280_ENGASE,0	ENSG00000167280_ENGASE,0			0.00189008	0.184273	Diagnosis	Immature
chr17:80101035-80101918	ENSG00000171298_GAA,0	ENSG00000171298_GAA,0			0.00148275	0.182371	Diagnosis	Immature
chr17:80454406-80455305	ENSG00000260369_AC120024.1,0	ENSG00000260369_AC120024.1,0			0.000950652	0.176326	Diagnosis	Immature
chr17:80501560-80502491					0.000499874	0.171004	Diagnosis	Immature
chr17:80773267-80774101		ENSG00000141564_RPTOR,228448			0.00753445	0.240176	Diagnosis	Immature
chr17:81238742-81239650	ENSG00000167302_TEPSIN,0;ENSG00000224877_NDUFAF8,0	ENSG00000167302_TEPSIN,0;ENSG00000224877_NDUFAF8,0			0.000222298	0.171004	Diagnosis	Immature
chr17:81385017-81385868	ENSG00000274833_AC110285.5,-1547;ENSG00000262223_AC110285.1,0	ENSG00000262223_AC110285.1,0			0.00206472	0.188489	Diagnosis	Immature
chr17:81386553-81387364	ENSG00000262223_AC110285.1,-1089;ENSG00000274833_AC110285.5,-51				0.0045912	0.216661	Diagnosis	Immature
chr17:81394852-81395762	ENSG00000266074_BAHCC1,0	ENSG00000266074_BAHCC1,0			0.000317827	0.171004	Diagnosis	Immature
chr17:81552066-81552944	ENSG00000185504_FAAP100,1017	ENSG00000185504_FAAP100,1017			0.00139565	0.182371	Diagnosis	Immature
chr17:81621314-81622244		ENSG00000182446_NPLOC4,26221			0.00616899	0.231627	Diagnosis	Immature
chr17:81702922-81703815	ENSG00000262049_AC139530.1,0;ENSG00000262814_MRPL12,0	ENSG00000262049_AC139530.1,0;ENSG00000262814_MRPL12,0;ENSG00000185359_HGS,19596			0.00305845	0.2	Diagnosis	Immature
chr17:81711762-81712688	ENSG00000183048_SLC25A10,0	ENSG00000183048_SLC25A10,0			0.00205075	0.188276	Diagnosis	Immature
chr17:81832776-81833702	ENSG00000225663_MCRIP1,0;ENSG00000182676_PPP1R27,1348	ENSG00000225663_MCRIP1,0;ENSG00000182676_PPP1R27,1348			0.00482495	0.22009	Diagnosis	Immature
chr17:81917665-81918542		ENSG00000187531_SIRT7,2781;ENSG00000197063_MAFG,9193			0.00806449	0.243514	Diagnosis	Immature
chr17:82022638-82023561	ENSG00000169683_LRRC45,0;ENSG00000169689_CENPX,546	ENSG00000169683_LRRC45,0;ENSG00000169689_CENPX,546			0.00336112	0.205115	Diagnosis	Immature
chr17:82065372-82066269	ENSG00000169718_DUS1L,0	ENSG00000169718_DUS1L,0			0.00630577	0.232937	Diagnosis	Immature
chr17:82496841-82497732					0.00147336	0.182371	Diagnosis	Immature
chr17:82716142-82717051	ENSG00000263063_AC024361.2,0;ENSG00000141560_FN3KRP,0	ENSG00000263063_AC024361.2,0;ENSG00000141560_FN3KRP,0			0.000707861	0.171004	Diagnosis	Immature
chr17:82751415-82752279	ENSG00000141556_TBCD,0	ENSG00000141556_TBCD,0			0.000518448	0.171004	Diagnosis	Immature
chr18:158092-158961	ENSG00000101557_USP14,0	ENSG00000101557_USP14,0			0.00227238	0.193278	Diagnosis	Immature
chr18:219837-220772		ENSG00000079134_THOC1,47278			0.00437444	0.213182	Diagnosis	Immature
chr18:426755-427639		ENSG00000158270_COLEC12,73083			0.00696594	0.237872	Diagnosis	Immature
chr18:2655222-2656134	ENSG00000101596_SMCHD1,0	ENSG00000101596_SMCHD1,0			0.00640854	0.234058	Diagnosis	Immature
chr18:3261572-3262449	ENSG00000264235_AP005329.1,0;ENSG00000118680_MYL12B,93	ENSG00000264235_AP005329.1,0;ENSG00000118680_MYL12B,93			0.00341626	0.205115	Diagnosis	Immature
chr18:3397164-3398079					0.00652439	0.235673	Diagnosis	Immature
chr18:6729267-6730099	ENSG00000088756_ARHGAP28,0;ENSG00000266441_AP005205.2,0	ENSG00000266441_AP005205.2,0;ENSG00000088756_ARHGAP28,0			0.00273586	0.196728	Diagnosis	Immature
chr18:7566715-7567566	ENSG00000173482_PTPRM,0	ENSG00000173482_PTPRM,0			0.00149711	0.182371	Diagnosis	Immature
chr18:8608968-8609870	ENSG00000206418_RAB12,0	ENSG00000206418_RAB12,0			0.00257882	0.195372	Diagnosis	Immature
chr18:9102212-9103119	ENSG00000178127_NDUFV2,0	ENSG00000178127_NDUFV2,0			0.000836036	0.174388	Diagnosis	Immature
chr18:9136328-9137087	ENSG00000266053_NDUFV2-AS1,0;ENSG00000101745_ANKRD12,100	ENSG00000266053_NDUFV2-AS1,0;ENSG00000101745_ANKRD12,100			0.0035561	0.207505	Diagnosis	Immature
chr18:9614191-9615126	ENSG00000263627_PPP4R1-AS1,-138;ENSG00000154845_PPP4R1,114	ENSG00000154845_PPP4R1,114			0.000824024	0.174388	Diagnosis	Immature
chr18:9653087-9653996					0.00773605	0.241215	Diagnosis	Immature
chr18:9707730-9708655	ENSG00000168461_RAB31,0	ENSG00000168461_RAB31,0			0.00784704	0.24232	Diagnosis	Immature
chr18:10442310-10443239					0.000555083	0.171004	Diagnosis	Immature
chr18:10454126-10455036	ENSG00000154856_APCDD1,0	ENSG00000154856_APCDD1,0			0.00289163	0.197162	Diagnosis	Immature
chr18:11737649-11738564		ENSG00000141404_GNAL,48385			0.00360928	0.208274	Diagnosis	Immature
chr18:11908164-11908962	ENSG00000154889_MPPE1,0;ENSG00000273141_AP001269.4,0	ENSG00000154889_MPPE1,0;ENSG00000273141_AP001269.4,0			0.00727359	0.239479	Diagnosis	Immature
chr18:12657654-12658524	ENSG00000128789_PSMG2,0;ENSG00000134278_SPIRE1,0	ENSG00000134278_SPIRE1,0;ENSG00000128789_PSMG2,0			0.00117959	0.177939	Diagnosis	Immature
chr18:12947566-12948385	ENSG00000085415_SEH1L,433	ENSG00000085415_SEH1L,433			0.000497395	0.171004	Diagnosis	Immature
chr18:13565052-13565936	ENSG00000267503_AP005131.3,-17	ENSG00000168675_LDLRAD4,347554			0.0011948	0.177939	Diagnosis	Immature
chr18:14132089-14132989	ENSG00000175322_ZNF519,0	ENSG00000175322_ZNF519,0			0.0084932	0.244883	Diagnosis	Immature
chr18:21740435-21741228		ENSG00000101752_MIB1,35478			0.00676122	0.237192	Diagnosis	Immature
chr18:23135175-23136042	ENSG00000134508_CABLES1,611	ENSG00000134508_CABLES1,611			0.00685291	0.237552	Diagnosis	Immature
chr18:24397394-24398189	ENSG00000141447_OSBPL1A,0	ENSG00000141447_OSBPL1A,0			0.00135018	0.181375	Diagnosis	Immature
chr18:26090341-26091200	ENSG00000141380_SS18,17	ENSG00000141380_SS18,17			0.00804008	0.243514	Diagnosis	Immature
chr18:26656565-26657379	ENSG00000134504_KCTD1,22;ENSG00000260372_AQP4-AS1,828	ENSG00000134504_KCTD1,22;ENSG00000260372_AQP4-AS1,828			0.00758331	0.240176	Diagnosis	Immature
chr18:28086493-28087357		ENSG00000170558_CDH2,89773			0.00357117	0.207659	Diagnosis	Immature
chr18:32470463-32471318	ENSG00000141441_GAREM1,0;ENSG00000285095_AC025887.2,175	ENSG00000141441_GAREM1,0;ENSG00000285095_AC025887.2,175			0.00106949	0.17692	Diagnosis	Immature
chr18:35040930-35041815		ENSG00000166974_MAPRE2,64002			0.000387852	0.171004	Diagnosis	Immature
chr18:35289840-35290732	ENSG00000268573_AC011815.1,0;ENSG00000186814_ZSCAN30,0	ENSG00000186814_ZSCAN30,0;ENSG00000268573_AC011815.1,0			0.00227328	0.193278	Diagnosis	Immature
chr18:35343969-35344746	ENSG00000172466_ZNF24,736	ENSG00000172466_ZNF24,736			0.00126255	0.180247	Diagnosis	Immature
chr18:35497327-35498199	ENSG00000153391_INO80C,0	ENSG00000153391_INO80C,0			0.00343931	0.205167	Diagnosis	Immature
chr18:35972016-35972945	ENSG00000141428_C18orf21,0	ENSG00000141428_C18orf21,0			0.00191411	0.185186	Diagnosis	Immature
chr18:38076905-38077748					0.00149534	0.182371	Diagnosis	Immature
chr18:40670447-40671402					0.00766731	0.240734	Diagnosis	Immature
chr18:41954762-41955660	ENSG00000078142_PIK3C3,0	ENSG00000078142_PIK3C3,0			0.00358079	0.20811	Diagnosis	Immature
chr18:44678823-44679722	ENSG00000152217_SETBP1,-451;ENSG00000267414_AC120049.1,0	ENSG00000267414_AC120049.1,0			0.00184334	0.184273	Diagnosis	Immature
chr18:46173475-46174301	ENSG00000152242_C18orf25,0	ENSG00000152242_C18orf25,0			0.00674425	0.237039	Diagnosis	Immature
chr18:46333547-46334437		ENSG00000141622_RNF165,6738			0.00323888	0.202248	Diagnosis	Immature
chr18:46770932-46771858		ENSG00000270112_AC090241.2,14445			0.00509874	0.221725	Diagnosis	Immature
chr18:47149985-47150902	ENSG00000167220_HDHD2,0	ENSG00000167220_HDHD2,0			0.003069	0.2	Diagnosis	Immature
chr18:48161341-48162265	ENSG00000286583_AC105101.2,0	ENSG00000286583_AC105101.2,0;ENSG00000184828_ZBTB7C,248487			0.00616004	0.231554	Diagnosis	Immature
chr18:48540829-48541560	ENSG00000134030_CTIF,1798	ENSG00000134030_CTIF,1798			0.00843854	0.244527	Diagnosis	Immature
chr18:50674134-50674961		ENSG00000141639_MAPK4,114047			0.00797948	0.243514	Diagnosis	Immature
chr18:51029888-51030854	ENSG00000141646_SMAD4,1494	ENSG00000141646_SMAD4,1494			0.00043671	0.171004	Diagnosis	Immature
chr18:53589326-53590216		ENSG00000263438_LINC01919,20887			0.00492631	0.220175	Diagnosis	Immature
chr18:54357397-54358302	ENSG00000166845_C18orf54,0;ENSG00000174448_STARD6,0	ENSG00000174448_STARD6,0;ENSG00000166845_C18orf54,0			0.00733816	0.239832	Diagnosis	Immature
chr18:56638217-56639101		ENSG00000091164_TXNL1,12499			0.00091824	0.176098	Diagnosis	Immature
chr18:56650877-56651756	ENSG00000091157_WDR7,0;ENSG00000091164_TXNL1,0	ENSG00000091164_TXNL1,0;ENSG00000091157_WDR7,0			0.00155965	0.182746	Diagnosis	Immature
chr18:57398068-57398926					8.8307e-14	9.80773e-09	Diagnosis	Immature
chr18:58671013-58671856	ENSG00000172175_MALT1,0;ENSG00000267226_AC104971.1,21	ENSG00000172175_MALT1,0;ENSG00000267226_AC104971.1,21			0.00622213	0.232369	Diagnosis	Immature
chr18:62186717-62187636	ENSG00000197563_PIGN,0;ENSG00000134444_RELCH,0	ENSG00000197563_PIGN,0;ENSG00000134444_RELCH,0			0.00397859	0.211609	Diagnosis	Immature
chr18:62690203-62691113					0.00304989	0.19988	Diagnosis	Immature
chr18:67516440-67517337	ENSG00000265533_AC114689.3,0;ENSG00000171451_DSEL,0	ENSG00000171451_DSEL,0;ENSG00000265533_AC114689.3,0			0.000136293	0.171004	Diagnosis	Immature
chr18:70031790-70032502		ENSG00000176225_RTTN,173224			0.00720049	0.239479	Diagnosis	Immature
chr18:70205486-70206393	ENSG00000176225_RTTN,0;ENSG00000287646_AC021701.1,0	ENSG00000176225_RTTN,0;ENSG00000287646_AC021701.1,0			0.00514584	0.221988	Diagnosis	Immature
chr18:74495808-74496674	ENSG00000133313_CNDP2,0	ENSG00000133313_CNDP2,0			8.42603e-05	0.171004	Diagnosis	Immature
chr18:78722134-78723042					0.00570752	0.226717	Diagnosis	Immature
chr18:79951260-79952146	ENSG00000122490_SLC66A2,0	ENSG00000122490_SLC66A2,0			0.00102597	0.176647	Diagnosis	Immature
chr18:80108834-80109615	ENSG00000101544_ADNP2,0	ENSG00000101544_ADNP2,0			0.00249411	0.193923	Diagnosis	Immature
chr19:488705-489563	ENSG00000099866_MADCAM1,0	ENSG00000099866_MADCAM1,0			0.00158822	0.182746	Diagnosis	Immature
chr19:572104-572972	ENSG00000267751_AC009005.1,0;ENSG00000172270_BSG,827	ENSG00000267751_AC009005.1,0;ENSG00000172270_BSG,827			0.000400787	0.171004	Diagnosis	Immature
chr19:639358-640273	ENSG00000261204_AC004449.1,-1821;ENSG00000070388_FGF22,0	ENSG00000070388_FGF22,0			0.00185669	0.184273	Diagnosis	Immature
chr19:680171-681077		ENSG00000070404_FSTL3,3779			0.00277758	0.196728	Diagnosis	Immature
chr19:796842-797700	ENSG00000011304_PTBP1,0	ENSG00000011304_PTBP1,0			0.00196363	0.186248	Diagnosis	Immature
chr19:1205171-1206093		ENSG00000118046_STK11,27613			0.00038793	0.171004	Diagnosis	Immature
chr19:1239872-1240700	ENSG00000099625_CBARP,-1845;ENSG00000099624_ATP5F1D,-1046;ENSG00000267778_AC004221.1,1693				0.00128264	0.180403	Diagnosis	Immature
chr19:1248304-1249050	ENSG00000167470_MIDN,0	ENSG00000167470_MIDN,0			0.00524799	0.222892	Diagnosis	Immature
chr19:1260542-1261463	ENSG00000099622_CIRBP,1158	ENSG00000099622_CIRBP,1158			0.000512135	0.171004	Diagnosis	Immature
chr19:1268861-1269699	ENSG00000267493_CIRBP-AS1,561	ENSG00000267493_CIRBP-AS1,561;ENSG00000099622_CIRBP,9477			0.00232813	0.193625	Diagnosis	Immature
chr19:1275230-1276183	ENSG00000228300_FAM174C,0	ENSG00000228300_FAM174C,0			0.00307029	0.2	Diagnosis	Immature
chr19:1383239-1384127	ENSG00000115286_NDUFS7,0	ENSG00000115286_NDUFS7,0			0.00632516	0.233135	Diagnosis	Immature
chr19:1406967-1407889	ENSG00000071626_DAZAP1,0	ENSG00000071626_DAZAP1,0			0.00303549	0.199762	Diagnosis	Immature
chr19:1411477-1412383		ENSG00000071626_DAZAP1,3908			0.00845207	0.244527	Diagnosis	Immature
chr19:1453389-1454283		ENSG00000115266_APC2,7087			0.0010784	0.17692	Diagnosis	Immature
chr19:1478806-1479727	ENSG00000119559_C19orf25,0	ENSG00000119559_C19orf25,0			0.00715345	0.239088	Diagnosis	Immature
chr19:1851648-1852519	ENSG00000267125_AC012615.3,0	ENSG00000267125_AC012615.3,0;ENSG00000129911_KLF16,11060			0.00188678	0.184273	Diagnosis	Immature
chr19:2163477-2164344	ENSG00000104885_DOT1L,0;ENSG00000065000_AP3D1,124	ENSG00000104885_DOT1L,0;ENSG00000065000_AP3D1,124			0.00115311	0.177858	Diagnosis	Immature
chr19:2236045-2236979	ENSG00000104897_SF3A2,0;ENSG00000104886_PLEKHJ1,725	ENSG00000104897_SF3A2,0;ENSG00000104886_PLEKHJ1,725			0.00402616	0.211609	Diagnosis	Immature
chr19:2702318-2703219	ENSG00000276097_AC006538.3,-1052;ENSG00000176533_GNG7,0	ENSG00000176533_GNG7,0			0.00048229	0.171004	Diagnosis	Immature
chr19:2742848-2743684					0.00719272	0.239479	Diagnosis	Immature
chr19:2782985-2783880	ENSG00000172009_THOP1,-1623;ENSG00000104969_SGTA,0	ENSG00000104969_SGTA,0			0.000737119	0.171271	Diagnosis	Immature
chr19:2900314-2901237	ENSG00000171970_ZNF57,0	ENSG00000171970_ZNF57,0			0.00033442	0.171004	Diagnosis	Immature
chr19:2944670-2945603	ENSG00000175691_ZNF77,0	ENSG00000175691_ZNF77,0			0.00841595	0.244479	Diagnosis	Immature
chr19:3036110-3036563		ENSG00000065717_TLE2,11072			0.00332528	0.204722	Diagnosis	Immature
chr19:3062178-3063034	ENSG00000104964_TLE5,73	ENSG00000104964_TLE5,73			0.00776921	0.2415	Diagnosis	Immature
chr19:3270568-3271279		ENSG00000161082_CELF5,45907			0.00360878	0.208274	Diagnosis	Immature
chr19:3493843-3494713		ENSG00000129932_DOHH,6227			0.00517124	0.222101	Diagnosis	Immature
chr19:3984915-3985796	ENSG00000167658_EEF2,0	ENSG00000167658_EEF2,0			0.00408232	0.21197	Diagnosis	Immature
chr19:4007091-4008021	ENSG00000105229_PIAS4,0	ENSG00000105229_PIAS4,0			0.00769579	0.241175	Diagnosis	Immature
chr19:4457467-4458355	ENSG00000167671_UBXN6,0	ENSG00000167671_UBXN6,0;ENSG00000267011_AC011498.1,13138			0.00574619	0.22752	Diagnosis	Immature
chr19:4471471-4472407	ENSG00000267011_AC011498.1,0;ENSG00000167674_HDGFL2,0	ENSG00000267011_AC011498.1,0;ENSG00000167674_HDGFL2,0			0.000213452	0.171004	Diagnosis	Immature
chr19:4638945-4639864	ENSG00000185361_TNFAIP8L1,0	ENSG00000185361_TNFAIP8L1,0			0.0011335	0.17692	Diagnosis	Immature
chr19:4742533-4743363					0.00562309	0.225411	Diagnosis	Immature
chr19:4867312-4868207	ENSG00000105355_PLIN3,0	ENSG00000105355_PLIN3,0			0.00876673	0.247564	Diagnosis	Immature
chr19:4877862-4878738					0.00570124	0.226711	Diagnosis	Immature
chr19:4968431-4969358	ENSG00000127663_KDM4B,0	ENSG00000127663_KDM4B,0			0.00807211	0.243514	Diagnosis	Immature
chr19:5035512-5036426		ENSG00000127663_KDM4B,66399			0.00601485	0.230409	Diagnosis	Immature
chr19:5308553-5309384		ENSG00000105426_PTPRS,31419			0.00897369	0.24992	Diagnosis	Immature
chr19:5489516-5490333					0.00658543	0.235673	Diagnosis	Immature
chr19:5719935-5720819	ENSG00000196365_LONP1,0;ENSG00000174898_CATSPERD,0	ENSG00000196365_LONP1,0;ENSG00000174898_CATSPERD,0			0.00167704	0.184273	Diagnosis	Immature
chr19:5977749-5978630	ENSG00000031823_RANBP3,0;ENSG00000266983_AC011444.1,0	ENSG00000031823_RANBP3,0;ENSG00000266983_AC011444.1,0			0.00458034	0.216661	Diagnosis	Immature
chr19:6110188-6111096	ENSG00000267299_AC011444.3,866	ENSG00000267299_AC011444.3,866;ENSG00000087903_RFX2,88476			0.00205465	0.188276	Diagnosis	Immature
chr19:6241406-6242297		ENSG00000130382_MLLT1,37678			0.00769902	0.241209	Diagnosis	Immature
chr19:6424705-6425614	ENSG00000088247_KHSRP,0	ENSG00000088247_KHSRP,0			0.000619667	0.171004	Diagnosis	Immature
chr19:6509247-6510126					0.000512373	0.171004	Diagnosis	Immature
chr19:7196830-7197556		ENSG00000171105_INSR,96858			0.00829102	0.244261	Diagnosis	Immature
chr19:7197785-7198677		ENSG00000171105_INSR,95737			0.000535071	0.171004	Diagnosis	Immature
chr19:7522075-7522981	ENSG00000269371_AC008878.4,-1615;ENSG00000090674_MCOLN1,0	ENSG00000090674_MCOLN1,0			0.00438627	0.21331	Diagnosis	Immature
chr19:7829461-7830395	ENSG00000142459_EVI5L,0	ENSG00000142459_EVI5L,0			3.66438e-05	0.171004	Diagnosis	Immature
chr19:7903304-7904180	ENSG00000214248_AC010336.1,0;ENSG00000076984_MAP2K7,0	ENSG00000214248_AC010336.1,0;ENSG00000076984_MAP2K7,0			0.000466873	0.171004	Diagnosis	Immature
chr19:7943399-7944290	ENSG00000104980_TIMM44,0;ENSG00000286138_AC010336.8,0	ENSG00000104980_TIMM44,0;ENSG00000286138_AC010336.8,0			0.0075487	0.240176	Diagnosis	Immature
chr19:8005226-8006119	ENSG00000066044_ELAVL1,0	ENSG00000066044_ELAVL1,0			0.000922235	0.176098	Diagnosis	Immature
chr19:8208808-8209697		ENSG00000090661_CERS4,2072			0.00280767	0.196728	Diagnosis	Immature
chr19:8342906-8343769	ENSG00000186994_KANK3,0	ENSG00000186994_KANK3,0			0.0072066	0.239479	Diagnosis	Immature
chr19:8412744-8413646	ENSG00000099785_MARCH2,0	ENSG00000099785_MARCH2,0			0.00537115	0.223927	Diagnosis	Immature
chr19:8513562-8514468	ENSG00000133250_ZNF414,0	ENSG00000133250_ZNF414,0			0.000474983	0.171004	Diagnosis	Immature
chr19:8832207-8833088	ENSG00000167785_ZNF558,0;ENSG00000170948_MBD3L1,0;ENSG00000269400_AC008734.2,0	ENSG00000167785_ZNF558,0;ENSG00000170948_MBD3L1,0;ENSG00000269400_AC008734.2,0			0.000981527	0.17638	Diagnosis	Immature
chr19:10095818-10096714		ENSG00000130812_ANGPTL6,6082			0.000671145	0.171004	Diagnosis	Immature
chr19:10105885-10106783	ENSG00000130810_PPAN,0	ENSG00000130810_PPAN,0			0.00196137	0.186248	Diagnosis	Immature
chr19:10194479-10195347		ENSG00000130816_DNMT1,35939			0.00188053	0.184273	Diagnosis	Immature
chr19:10226995-10227858		ENSG00000130816_DNMT1,3428;ENSG00000267534_S1PR2,3473			0.00464488	0.217535	Diagnosis	Immature
chr19:10344605-10345531					0.00690404	0.237674	Diagnosis	Immature
chr19:10403270-10404086		ENSG00000105401_CDC37,16035			0.000825141	0.174388	Diagnosis	Immature
chr19:10653708-10654608	ENSG00000267100_ILF3-DT,0;ENSG00000129351_ILF3,0	ENSG00000267100_ILF3-DT,0;ENSG00000129351_ILF3,0			0.00112457	0.17692	Diagnosis	Immature
chr19:10717394-10718287	ENSG00000079805_DNM2,0	ENSG00000079805_DNM2,0			0.00556638	0.224869	Diagnosis	Immature
chr19:10835560-10836430	ENSG00000214212_C19orf38,-145;ENSG00000099203_TMED1,0	ENSG00000099203_TMED1,0			0.00573393	0.227197	Diagnosis	Immature
chr19:11197226-11198156	ENSG00000197256_KANK2,0	ENSG00000197256_KANK2,0			0.00686249	0.237552	Diagnosis	Immature
chr19:11373190-11373870	ENSG00000173928_SWSAP1,-796;ENSG00000267277_AC024575.1,1065	ENSG00000267277_AC024575.1,1065			0.00510484	0.22173	Diagnosis	Immature
chr19:11434870-11435802	ENSG00000130175_PRKCSH,0;ENSG00000198003_CCDC151,0	ENSG00000198003_CCDC151,0;ENSG00000130175_PRKCSH,0			6.13241e-05	0.171004	Diagnosis	Immature
chr19:11766624-11767502	ENSG00000197044_ZNF441,0	ENSG00000197044_ZNF441,0			0.00758771	0.240176	Diagnosis	Immature
chr19:11988538-11989429	ENSG00000219665_ZNF433-AS1,921	ENSG00000219665_ZNF433-AS1,921			0.00748696	0.240176	Diagnosis	Immature
chr19:12294448-12295326	ENSG00000197857_ZNF44,0	ENSG00000197857_ZNF44,0			0.0015585	0.182746	Diagnosis	Immature
chr19:12669127-12670009	ENSG00000105583_WDR83OS,0;ENSG00000285583_AC010422.7,1014	ENSG00000105583_WDR83OS,0;ENSG00000123154_WDR83,2325			0.00577669	0.227797	Diagnosis	Immature
chr19:12722206-12723017	ENSG00000105576_TNPO2,994	ENSG00000105576_TNPO2,994			0.00707548	0.238347	Diagnosis	Immature
chr19:12789598-12790481	ENSG00000171223_JUNB,-1005	ENSG00000095066_HOOK2,82259			0.00727939	0.239479	Diagnosis	Immature
chr19:12791058-12791905	ENSG00000171223_JUNB,0	ENSG00000171223_JUNB,0;ENSG00000095066_HOOK2,80835			0.0062704	0.232881	Diagnosis	Immature
chr19:12838045-12838882		ENSG00000105613_MAST1,4094;ENSG00000095066_HOOK2,33858			0.00428937	0.212666	Diagnosis	Immature
chr19:12890556-12891476	ENSG00000105607_GCDH,0	ENSG00000105607_GCDH,0			0.00415522	0.212281	Diagnosis	Immature
chr19:12918895-12919811	ENSG00000161860_SYCE2,0	ENSG00000161860_SYCE2,0			0.00523161	0.222892	Diagnosis	Immature
chr19:12945451-12946332	ENSG00000267458_AC092069.1,-964;ENSG00000179262_RAD23A,0	ENSG00000179262_RAD23A,0			0.00698774	0.237986	Diagnosis	Immature
chr19:13117823-13118684	ENSG00000104907_TRMT1,-256;ENSG00000160877_NACC1,961	ENSG00000160877_NACC1,961			0.00199727	0.186503	Diagnosis	Immature
chr19:13152714-13153500	ENSG00000287296_AC011446.3,0;ENSG00000267598_AC011446.2,693	ENSG00000287296_AC011446.3,0;ENSG00000267598_AC011446.2,693;ENSG00000160888_IER2,2303			0.00180199	0.184273	Diagnosis	Immature
chr19:13747371-13748268		ENSG00000104957_CCDC130,15611			0.000598299	0.171004	Diagnosis	Immature
chr19:14081024-14081942		ENSG00000188032_C19orf67,3933			0.000860534	0.174388	Diagnosis	Immature
chr19:14117541-14118437	ENSG00000267783_AC022098.3,-669;ENSG00000072062_PRKACA,0	ENSG00000072062_PRKACA,0			0.000864884	0.174388	Diagnosis	Immature
chr19:14136422-14137352	ENSG00000105011_ASF1B,0;ENSG00000267169_AC022098.1,0	ENSG00000105011_ASF1B,0;ENSG00000267169_AC022098.1,0			0.00487243	0.220175	Diagnosis	Immature
chr19:14206607-14207416	ENSG00000072071_ADGRL1,-420				0.00180026	0.184273	Diagnosis	Immature
chr19:14418953-14419841	ENSG00000123136_DDX39A,0	ENSG00000123136_DDX39A,0			0.000591183	0.171004	Diagnosis	Immature
chr19:14571593-14572482	ENSG00000099795_NDUFB7,0	ENSG00000099795_NDUFB7,0			0.00647852	0.234987	Diagnosis	Immature
chr19:15332064-15332825	ENSG00000141867_BRD4,0	ENSG00000141867_BRD4,0			0.00744173	0.240135	Diagnosis	Immature
chr19:15379330-15380180	ENSG00000105127_AKAP8,0;ENSG00000268189_AC005785.1,254	ENSG00000105127_AKAP8,0;ENSG00000268189_AC005785.1,254;ENSG00000011243_AKAP8L,38961			0.00625512	0.23271	Diagnosis	Immature
chr19:15836585-15837474	ENSG00000267308_LINC01764,-732				0.00570464	0.226717	Diagnosis	Immature
chr19:16111192-16112119	ENSG00000167461_RAB8A,0	ENSG00000167461_RAB8A,0			0.00551037	0.224691	Diagnosis	Immature
chr19:16184916-16185775	ENSG00000105058_FAM32A,0	ENSG00000105058_FAM32A,0			0.0045832	0.216661	Diagnosis	Immature
chr19:17225953-17226874	ENSG00000099330_OCEL1,0	ENSG00000099330_OCEL1,0			0.0055279	0.224691	Diagnosis	Immature
chr19:17235274-17236087		ENSG00000160113_NR2F6,9853			0.00551554	0.224691	Diagnosis	Immature
chr19:17266793-17267719	ENSG00000105393_BABAM1,0	ENSG00000105393_BABAM1,0;ENSG00000130307_USHBP1,15067			0.00371488	0.209409	Diagnosis	Immature
chr19:17305298-17306150		ENSG00000127220_ABHD8,4086;ENSG00000130312_MRPL34,12689			0.0050059	0.221118	Diagnosis	Immature
chr19:17309046-17309921	ENSG00000130311_DDA1,0;ENSG00000127220_ABHD8,315	ENSG00000130311_DDA1,0;ENSG00000127220_ABHD8,315			0.00524209	0.222892	Diagnosis	Immature
chr19:17390737-17391590		ENSG00000269720_CCDC194,2568			0.00415907	0.212281	Diagnosis	Immature
chr19:17419506-17420398	ENSG00000269053_AC010319.3,0;ENSG00000269481_AC010319.4,1926	ENSG00000269053_AC010319.3,0;ENSG00000269481_AC010319.4,1926;ENSG00000141971_MVB12A,13784			0.00141192	0.182371	Diagnosis	Immature
chr19:17719180-17720039	ENSG00000130479_MAP1S,0	ENSG00000130479_MAP1S,0			0.00489907	0.220175	Diagnosis	Immature
chr19:17830565-17831467		ENSG00000105639_JAK3,16604			0.000871234	0.174388	Diagnosis	Immature
chr19:18152619-18153439	ENSG00000269145_AC007192.2,-928;ENSG00000105647_PIK3R2,0	ENSG00000105647_PIK3R2,0			0.00461863	0.217218	Diagnosis	Immature
chr19:18192566-18193496	ENSG00000254858_MPV17L2,0	ENSG00000254858_MPV17L2,0			0.00287015	0.197137	Diagnosis	Immature
chr19:18203736-18204641	ENSG00000268650_AC005759.1,-89;ENSG00000105649_RAB3A,0	ENSG00000105649_RAB3A,0			0.000974858	0.176338	Diagnosis	Immature
chr19:18279327-18280040	ENSG00000130522_JUND,1582	ENSG00000130522_JUND,1582			0.00376375	0.209409	Diagnosis	Immature
chr19:18281309-18282200	ENSG00000130522_JUND,0	ENSG00000130522_JUND,0			0.00415728	0.212281	Diagnosis	Immature
chr19:18292727-18293485					0.00500159	0.221118	Diagnosis	Immature
chr19:18521863-18522796	ENSG00000105656_ELL,0	ENSG00000105656_ELL,0			0.0052128	0.222892	Diagnosis	Immature
chr19:18543145-18543975	ENSG00000105701_FKBP8,102	ENSG00000105701_FKBP8,102			0.00523758	0.222892	Diagnosis	Immature
chr19:18588503-18589329	ENSG00000006015_REX1BD,0	ENSG00000006015_REX1BD,0;ENSG00000006016_CRLF1,18412			0.0021995	0.191381	Diagnosis	Immature
chr19:18590321-18591192	ENSG00000006015_REX1BD,1636	ENSG00000006015_REX1BD,1636;ENSG00000006016_CRLF1,16549			0.00703693	0.238132	Diagnosis	Immature
chr19:18895877-18896691	ENSG00000130283_GDF1,0;ENSG00000223802_CERS1,36	ENSG00000130283_GDF1,0;ENSG00000223802_CERS1,36			0.00157342	0.182746	Diagnosis	Immature
chr19:18919086-18919991	ENSG00000105669_COPE,0;ENSG00000105671_DDX49,0	ENSG00000105669_COPE,0;ENSG00000105671_DDX49,0			0.000171408	0.171004	Diagnosis	Immature
chr19:19063320-19064235	ENSG00000181035_SLC25A42,0	ENSG00000181035_SLC25A42,0			0.00650858	0.235462	Diagnosis	Immature
chr19:19192055-19192990	ENSG00000213999_MEF2B,0;ENSG00000064490_RFXANK,0;ENSG00000254901_BORCS8,0	ENSG00000213999_MEF2B,0;ENSG00000254901_BORCS8,0;ENSG00000064490_RFXANK,0			0.000627496	0.171004	Diagnosis	Immature
chr19:19528527-19529370	ENSG00000250067_YJEFN3,0	ENSG00000250067_YJEFN3,0;ENSG00000186010_NDUFA13,12791			0.000991152	0.176418	Diagnosis	Immature
chr19:19663397-19664324	ENSG00000105726_ATP13A1,0	ENSG00000105726_ATP13A1,0			0.000303862	0.171004	Diagnosis	Immature
chr19:19668360-19669252	ENSG00000181896_ZNF101,0	ENSG00000181896_ZNF101,0			0.00379214	0.209409	Diagnosis	Immature
chr19:20051804-20052729					0.000395604	0.171004	Diagnosis	Immature
chr19:20279307-20280178		ENSG00000267383_AC011447.3,41127			0.00110347	0.17692	Diagnosis	Immature
chr19:20565298-20566127	ENSG00000237440_ZNF737,0	ENSG00000237440_ZNF737,0;ENSG00000269043_AC008554.1,132746			0.000853049	0.174388	Diagnosis	Immature
chr19:20999443-21000332					0.00424245	0.212613	Diagnosis	Immature
chr19:21358573-21359439	ENSG00000172687_ZNF738,0	ENSG00000172687_ZNF738,0			0.00600517	0.230409	Diagnosis	Immature
chr19:21505267-21506080		ENSG00000197013_ZNF429,8585			0.00516084	0.222101	Diagnosis	Immature
chr19:21568907-21569825	ENSG00000268081_AC123912.1,0	ENSG00000268081_AC123912.1,0;ENSG00000268555_AC123912.4,17497			0.00223702	0.19219	Diagnosis	Immature
chr19:23273713-23274543	ENSG00000284428_AC092329.4,0	ENSG00000284428_AC092329.4,0			0.00483272	0.220175	Diagnosis	Immature
chr19:23686637-23687500	ENSG00000197372_ZNF675,0	ENSG00000197372_ZNF675,0			0.00203794	0.187846	Diagnosis	Immature
chr19:23914413-23915308	ENSG00000213967_ZNF726,0	ENSG00000213967_ZNF726,0			0.00737889	0.240085	Diagnosis	Immature
chr19:24033140-24033987	ENSG00000268362_AC092279.1,0;ENSG00000213096_ZNF254,0	ENSG00000268362_AC092279.1,0;ENSG00000213096_ZNF254,0			0.00281169	0.196728	Diagnosis	Immature
chr19:27793503-27794427	ENSG00000261824_LINC00662,0;ENSG00000267575_AC006504.5,72	ENSG00000261824_LINC00662,0;ENSG00000267575_AC006504.5,72			0.00867494	0.246892	Diagnosis	Immature
chr19:28396051-28396870	ENSG00000267238_AC093074.1,0	ENSG00000267238_AC093074.1,0			0.00577579	0.227797	Diagnosis	Immature
chr19:29212729-29213589	ENSG00000169021_UQCRFS1,0;ENSG00000267498_AC007786.1,0	ENSG00000169021_UQCRFS1,0;ENSG00000267498_AC007786.1,0			0.00142432	0.182371	Diagnosis	Immature
chr19:29682707-29683605					0.00795336	0.243409	Diagnosis	Immature
chr19:30150336-30151219					0.00735465	0.240034	Diagnosis	Immature
chr19:32580709-32581595	ENSG00000105185_PDCD5,0	ENSG00000105185_PDCD5,0			0.000701256	0.171004	Diagnosis	Immature
chr19:33302238-33303120	ENSG00000267130_AC008738.2,-1916;ENSG00000245848_CEBPA,0;ENSG00000267296_CEBPA-DT,0;ENSG00000267727_AC008738.5,959	ENSG00000245848_CEBPA,0;ENSG00000267296_CEBPA-DT,0			0.00379272	0.209409	Diagnosis	Immature
chr19:34171977-34172910	ENSG00000257103_LSM14A,0	ENSG00000257103_LSM14A,0			0.00157101	0.182746	Diagnosis	Immature
chr19:34254252-34255081	ENSG00000166398_KIAA0355,0	ENSG00000166398_KIAA0355,0			0.00855263	0.245323	Diagnosis	Immature
chr19:34310142-34311061		ENSG00000166398_KIAA0355,55590			0.00581017	0.228324	Diagnosis	Immature
chr19:34364729-34365581		ENSG00000105220_GPI,5249			0.00593135	0.229948	Diagnosis	Immature
chr19:34999829-35000714	ENSG00000269303_AC020907.3,0	ENSG00000269303_AC020907.3,0;ENSG00000089351_GRAMD1A,5045			0.00488904	0.220175	Diagnosis	Immature
chr19:35030156-35030972	ENSG00000105711_SCN1B,0	ENSG00000105711_SCN1B,0			0.00643413	0.234131	Diagnosis	Immature
chr19:35267777-35268703	ENSG00000105698_USF2,-259	ENSG00000105699_LSR,19447			0.00434044	0.21268	Diagnosis	Immature
chr19:35269173-35270098	ENSG00000105698_USF2,211	ENSG00000105698_USF2,211			0.00704233	0.238159	Diagnosis	Immature
chr19:35290397-35291297	ENSG00000105695_MAG,-828				0.00845121	0.244527	Diagnosis	Immature
chr19:35291647-35292551	ENSG00000105695_MAG,0	ENSG00000105695_MAG,0			0.00362214	0.208274	Diagnosis	Immature
chr19:35717255-35718119	ENSG00000272333_KMT2B,0	ENSG00000272333_KMT2B,0			0.0071614	0.23926	Diagnosis	Immature
chr19:35740279-35741174	ENSG00000126246_IGFLR1,1279	ENSG00000126246_IGFLR1,1279			0.00545168	0.224691	Diagnosis	Immature
chr19:35757687-35758565	ENSG00000004776_HSPB6,0;ENSG00000167595_PROSER3,0	ENSG00000004776_HSPB6,0;ENSG00000167595_PROSER3,0			0.00562386	0.225411	Diagnosis	Immature
chr19:35775038-35775925	ENSG00000004777_ARHGAP33,506	ENSG00000004777_ARHGAP33,506			0.000465656	0.171004	Diagnosis	Immature
chr19:35868035-35868903	ENSG00000105290_APLP1,136;ENSG00000161270_NPHS1,384	ENSG00000105290_APLP1,136;ENSG00000161270_NPHS1,384			0.00254528	0.195097	Diagnosis	Immature
chr19:35935926-35936798	ENSG00000126243_LRFN3,568	ENSG00000126243_LRFN3,568			0.0081321	0.243514	Diagnosis	Immature
chr19:36013911-36014832	ENSG00000239382_ALKBH6,0;ENSG00000267698_AC002116.2,0	ENSG00000239382_ALKBH6,0;ENSG00000267698_AC002116.2,0;ENSG00000105270_CLIP3,18511			0.00077564	0.174388	Diagnosis	Immature
chr19:36054055-36055007	ENSG00000161277_THAP8,0;ENSG00000075702_WDR62,0	ENSG00000161277_THAP8,0;ENSG00000075702_WDR62,0			0.00313856	0.200884	Diagnosis	Immature
chr19:36114920-36115801	ENSG00000105258_POLR2I,0;ENSG00000105254_TBCB,631	ENSG00000105258_POLR2I,0;ENSG00000105254_TBCB,631			0.000432889	0.171004	Diagnosis	Immature
chr19:36214418-36215333	ENSG00000167635_ZNF146,0	ENSG00000167635_ZNF146,0;ENSG00000196357_ZNF565,30924			0.000450324	0.171004	Diagnosis	Immature
chr19:36331365-36332280	ENSG00000232677_LINC00665,0	ENSG00000232677_LINC00665,0			0.00811053	0.243514	Diagnosis	Immature
chr19:36418171-36419051	ENSG00000181007_ZFP82,0	ENSG00000181007_ZFP82,0			0.00634071	0.23336	Diagnosis	Immature
chr19:36796996-36797923	ENSG00000267254_ZNF790-AS1,0	ENSG00000267254_ZNF790-AS1,0			0.00445919	0.21447	Diagnosis	Immature
chr19:37210193-37211095		ENSG00000245680_ZNF585B,7058			0.00729129	0.239513	Diagnosis	Immature
chr19:37217616-37218540	ENSG00000188283_ZNF383,0;ENSG00000245680_ZNF585B,0	ENSG00000245680_ZNF585B,0;ENSG00000188283_ZNF383,0			0.0042493	0.212613	Diagnosis	Immature
chr19:37334133-37335028		ENSG00000181666_ZNF875,21296			0.00441221	0.213543	Diagnosis	Immature
chr19:37506233-37507045	ENSG00000267115_AC022148.2,-1768;ENSG00000188227_ZNF793,0;ENSG00000266916_ZNF793-AS1,77	ENSG00000188227_ZNF793,0;ENSG00000266916_ZNF793-AS1,77			0.00315255	0.200905	Diagnosis	Immature
chr19:37719171-37720043	ENSG00000198182_ZNF607,0	ENSG00000198182_ZNF607,0			0.0067419	0.237032	Diagnosis	Immature
chr19:38252811-38253636		ENSG00000167641_PPP1R14A,2896;ENSG00000167642_SPINT2,8776			0.00549014	0.224691	Diagnosis	Immature
chr19:38315599-38316497	ENSG00000167645_YIF1B,776	ENSG00000167645_YIF1B,776			0.000567135	0.171004	Diagnosis	Immature
chr19:38402686-38403541	ENSG00000130244_FAM98C,0	ENSG00000130244_FAM98C,0			0.000620753	0.171004	Diagnosis	Immature
chr19:38647118-38648008	ENSG00000130402_ACTN4,0	ENSG00000130402_ACTN4,0			0.00103727	0.176647	Diagnosis	Immature
chr19:38721698-38722616		ENSG00000130402_ACTN4,74049			0.00295327	0.19877	Diagnosis	Immature
chr19:38849820-38850719	ENSG00000104824_HNRNPL,1628	ENSG00000104824_HNRNPL,1628			0.00104517	0.176647	Diagnosis	Immature
chr19:38851668-38852481	ENSG00000104824_HNRNPL,0	ENSG00000104824_HNRNPL,0			0.00275213	0.196728	Diagnosis	Immature
chr19:38891566-38892450		ENSG00000068903_SIRT2,7412			0.00661546	0.235689	Diagnosis	Immature
chr19:39078394-39079267					0.00530615	0.223404	Diagnosis	Immature
chr19:39320360-39321242	ENSG00000268262_AC011445.1,0	ENSG00000268262_AC011445.1,0			0.00864481	0.24625	Diagnosis	Immature
chr19:39341777-39342705	ENSG00000269246_AC011445.2,0;ENSG00000130755_GMFG,0;ENSG00000179134_SAMD4B,0	ENSG00000130755_GMFG,0;ENSG00000269246_AC011445.2,0;ENSG00000179134_SAMD4B,0			0.0031017	0.200516	Diagnosis	Immature
chr19:39390752-39391649	ENSG00000006712_PAF1,0;ENSG00000063322_MED29,0	ENSG00000006712_PAF1,0;ENSG00000063322_MED29,0			0.00211269	0.189995	Diagnosis	Immature
chr19:39411873-39412811	ENSG00000090924_PLEKHG2,0	ENSG00000090924_PLEKHG2,0			0.00623891	0.232369	Diagnosis	Immature
chr19:39539661-39540536	ENSG00000176396_EID2,0	ENSG00000176396_EID2,0			0.00149574	0.182371	Diagnosis	Immature
chr19:39833411-39834245	ENSG00000105204_DYRK1B,0	ENSG00000105204_DYRK1B,0			0.00241745	0.193625	Diagnosis	Immature
chr19:40285007-40285803	ENSG00000105221_AKT2,0	ENSG00000105221_AKT2,0			0.00140493	0.182371	Diagnosis	Immature
chr19:40348057-40348976	ENSG00000105223_PLD3,0;ENSG00000160392_C19orf47,0	ENSG00000160392_C19orf47,0;ENSG00000105223_PLD3,0			0.00046222	0.171004	Diagnosis	Immature
chr19:40425527-40426382	ENSG00000197019_SERTAD1,0;ENSG00000277453_AC010271.2,0	ENSG00000197019_SERTAD1,0;ENSG00000277453_AC010271.2,0			0.00537625	0.223971	Diagnosis	Immature
chr19:40442784-40443587	ENSG00000268366_AC010271.1,0;ENSG00000167565_SERTAD3,748	ENSG00000268366_AC010271.1,0;ENSG00000167565_SERTAD3,748			0.00325144	0.202307	Diagnosis	Immature
chr19:40503037-40503947		ENSG00000160460_SPTBN4,36796			0.00877536	0.247682	Diagnosis	Immature
chr19:40750367-40751221	ENSG00000077312_SNRPA,0;ENSG00000188493_C19orf54,332	ENSG00000077312_SNRPA,0;ENSG00000188493_C19orf54,332			0.00126172	0.180247	Diagnosis	Immature
chr19:40798538-40799452	ENSG00000282951_AC008537.4,-1595;ENSG00000269858_EGLN2,0	ENSG00000269858_EGLN2,0			0.000160602	0.171004	Diagnosis	Immature
chr19:41363616-41364512	ENSG00000123810_B9D2,0	ENSG00000123810_B9D2,0;ENSG00000142046_TMEM91,12705			0.00550242	0.224691	Diagnosis	Immature
chr19:41859494-41860424	ENSG00000105372_RPS19,0	ENSG00000105372_RPS19,0			0.00469541	0.218106	Diagnosis	Immature
chr19:41883865-41884759	ENSG00000076928_ARHGEF1,704	ENSG00000076928_ARHGEF1,704			0.000827655	0.174388	Diagnosis	Immature
chr19:42075574-42076493		ENSG00000105732_ZNF574,7097			0.00548599	0.224691	Diagnosis	Immature
chr19:42217347-42218118		ENSG00000160570_DEDD2,2022			0.0034178	0.205115	Diagnosis	Immature
chr19:42253839-42254544	ENSG00000105722_ERF,584	ENSG00000105722_ERF,584			0.00457934	0.216661	Diagnosis	Immature
chr19:42268466-42269218	ENSG00000079432_CIC,0	ENSG00000079432_CIC,0			0.00690999	0.237674	Diagnosis	Immature
chr19:42325096-42325974	ENSG00000105429_MEGF8,0	ENSG00000105429_MEGF8,0			0.00137988	0.182371	Diagnosis	Immature
chr19:42412185-42413138		ENSG00000079435_LIPE,14250;ENSG00000213904_LIPE-AS1,15057			0.00362529	0.208274	Diagnosis	Immature
chr19:43532978-43533675		ENSG00000176472_ZNF575,7481			0.00296552	0.19877	Diagnosis	Immature
chr19:43533794-43534471		ENSG00000176472_ZNF575,8297			0.00372325	0.209409	Diagnosis	Immature
chr19:43619250-43620189	ENSG00000131116_ZNF428,0	ENSG00000131116_ZNF428,0			0.000855193	0.174388	Diagnosis	Immature
chr19:43934853-43935792	ENSG00000124459_ZNF45,0	ENSG00000124459_ZNF45,0			0.00726989	0.239479	Diagnosis	Immature
chr19:44845702-44846573	ENSG00000130202_NECTIN2,0	ENSG00000130202_NECTIN2,0			0.00377881	0.209409	Diagnosis	Immature
chr19:44912601-44913499	ENSG00000130208_APOC1,-748				0.00367598	0.209039	Diagnosis	Immature
chr19:45091220-45092073	ENSG00000104866_PPP1R37,0;ENSG00000267348_GEMIN7-AS1,562	ENSG00000104866_PPP1R37,0;ENSG00000267348_GEMIN7-AS1,562;ENSG00000007047_MARK4,11932;ENSG00000142252_GEMIN7,12025			0.00167146	0.184273	Diagnosis	Immature
chr19:45153130-45154048		ENSG00000179846_NKPD1,4689;ENSG00000007047_MARK4,73842			0.0086414	0.246216	Diagnosis	Immature
[truncated: 112,574 more rows]
