# Supplementary material for: A roadmap to human hippocampal neurogenesis in adulthood, aging and AD.
Source: Research Square preprint supplement (doi:10.21203/rs.3.rs-4469965/v1), 2024-05-30
Supplement: Supplementary file 14 [file d5c6efe377b24e46e3ab184a.xlsx]

## Sheet: MANGO_summary
Cluster	Contrast	Total	Up	Down
Immature	Diagnosis	84	0	0
Immature	1.YC/0.HA	1	0	1
Immature	3.AD/0.HA	863	0	863
Immature	3.AD/1.YC	1424	3	1421
Neural Stem	3.AD/1.YC	48	1	47
CODE	acronym in manuscript
HA	NCI
YC	YA
MCI	MCI
AD	AD

## Sheet: MANGO
ID	Promoter (2 kb upstream to 2 kb downstream)	Gene Body	log2FC	log2CPM	PValue	QValue	Contrast	Cluster
chr1:2529910-2530745	ENSG00000272449_AL139246.5,0;ENSG00000197921_HES5,0	ENSG00000197921_HES5,0;ENSG00000272449_AL139246.5,0			0.540085	0.653976	Diagnosis	Immature
chr1:3668655-3669485	ENSG00000227589_AL136528.1,0	ENSG00000227589_AL136528.1,0;ENSG00000078900_TP73,16139			0.304259	0.502471	Diagnosis	Immature
chr1:3695332-3696199		ENSG00000078900_TP73,42816			0.125673	0.41305	Diagnosis	Immature
chr1:3712817-3713626	ENSG00000235131_AL136528.2,672	ENSG00000235131_AL136528.2,672;ENSG00000078900_TP73,60301			0.0748241	0.381473	Diagnosis	Immature
chr1:3714188-3715039	ENSG00000235131_AL136528.2,0	ENSG00000235131_AL136528.2,0;ENSG00000078900_TP73,61672			0.0306696	0.327575	Diagnosis	Immature
chr1:3724098-3725006		ENSG00000078900_TP73,71582			0.28243	0.490938	Diagnosis	Immature
chr1:3727033-3727913		ENSG00000078900_TP73,74517			0.0520253	0.358263	Diagnosis	Immature
chr1:11109096-11109997		ENSG00000198793_MTOR,152554			0.163587	0.432201	Diagnosis	Immature
chr1:11130017-11130834		ENSG00000198793_MTOR,131717			0.658363	0.752028	Diagnosis	Immature
chr1:11134096-11134937		ENSG00000198793_MTOR,127614			0.288017	0.493984	Diagnosis	Immature
chr1:11138738-11139644		ENSG00000198793_MTOR,122907			0.389977	0.54963	Diagnosis	Immature
chr1:11157461-11158268		ENSG00000198793_MTOR,104283			0.212483	0.455598	Diagnosis	Immature
chr1:11158526-11159440		ENSG00000198793_MTOR,103111			0.35522	0.529958	Diagnosis	Immature
chr1:11177862-11178763		ENSG00000198793_MTOR,83788			0.427819	0.572886	Diagnosis	Immature
chr1:11187473-11188304	ENSG00000171819_ANGPTL7,-1051	ENSG00000198793_MTOR,74247			0.476895	0.605961	Diagnosis	Immature
chr1:11198961-11199882		ENSG00000198793_MTOR,62669			0.214861	0.456845	Diagnosis	Immature
chr1:11211949-11212829		ENSG00000198793_MTOR,49722			0.191676	0.444945	Diagnosis	Immature
chr1:11241493-11242378		ENSG00000198793_MTOR,20173			0.0925533	0.393742	Diagnosis	Immature
chr1:11246051-11246981		ENSG00000198793_MTOR,15570			0.483636	0.611196	Diagnosis	Immature
chr1:11262195-11263106	ENSG00000198793_MTOR,0	ENSG00000198793_MTOR,0			0.000609459	0.171004	Diagnosis	Immature
chr1:11691083-11691978	ENSG00000116670_MAD2L2,0;ENSG00000162490_DRAXIN,0	ENSG00000116670_MAD2L2,0;ENSG00000162490_DRAXIN,0			0.0755097	0.382052	Diagnosis	Immature
chr1:11701307-11702232		ENSG00000162490_DRAXIN,9597			0.0652622	0.372623	Diagnosis	Immature
chr1:11707454-11708339		ENSG00000162490_DRAXIN,15744			0.841581	0.894335	Diagnosis	Immature
chr1:11710904-11711753		ENSG00000162490_DRAXIN,19194			0.199092	0.448918	Diagnosis	Immature
chr1:11714956-11715850		ENSG00000162490_DRAXIN,23246			0.0379881	0.340607	Diagnosis	Immature
chr1:11719353-11720238		ENSG00000162490_DRAXIN,27643			0.165636	0.433577	Diagnosis	Immature
chr1:11720543-11721221		ENSG00000162490_DRAXIN,28833			0.468231	0.599838	Diagnosis	Immature
chr1:12166610-12167451	ENSG00000028137_TNFRSF1B,0	ENSG00000028137_TNFRSF1B,0			0.577785	0.683966	Diagnosis	Immature
chr1:12180258-12181008		ENSG00000028137_TNFRSF1B,13267			0.342965	0.523588	Diagnosis	Immature
chr1:12183976-12184892		ENSG00000028137_TNFRSF1B,16985			0.752828	0.828294	Diagnosis	Immature
chr1:12196366-12197271		ENSG00000028137_TNFRSF1B,29375			0.402554	0.557513	Diagnosis	Immature
chr1:12208567-12209465		ENSG00000028137_TNFRSF1B,41576			0.0914339	0.393118	Diagnosis	Immature
chr1:15513820-15514543		ENSG00000132906_CASP9,11991			0.0575713	0.36417	Diagnosis	Immature
chr1:15524268-15525005	ENSG00000116138_DNAJC16,-1808;ENSG00000132906_CASP9,1529	ENSG00000132906_CASP9,1529			0.00330281	0.203904	Diagnosis	Immature
chr1:15526328-15527227	ENSG00000132906_CASP9,0;ENSG00000116138_DNAJC16,0	ENSG00000132906_CASP9,0;ENSG00000116138_DNAJC16,0			0.0653899	0.372663	Diagnosis	Immature
chr1:22025043-22025938	ENSG00000070831_CDC42,0;ENSG00000228397_LINC01635,110;ENSG00000218510_LINC00339,485	ENSG00000070831_CDC42,0;ENSG00000228397_LINC01635,110;ENSG00000218510_LINC00339,485			0.0628481	0.369172	Diagnosis	Immature
chr1:22037816-22038717		ENSG00000070831_CDC42,12305;ENSG00000285752_CDC42-AS1,14210			0.334847	0.518983	Diagnosis	Immature
chr1:22039588-22040447		ENSG00000285752_CDC42-AS1,12480;ENSG00000070831_CDC42,14077			0.816622	0.876024	Diagnosis	Immature
chr1:22048197-22049129		ENSG00000285752_CDC42-AS1,3798;ENSG00000070831_CDC42,22686			0.14317	0.422842	Diagnosis	Immature
chr1:22052391-22053156	ENSG00000285752_CDC42-AS1,0	ENSG00000285752_CDC42-AS1,0;ENSG00000070831_CDC42,26880			0.00512716	0.221829	Diagnosis	Immature
chr1:22090808-22091642		ENSG00000070831_CDC42,65297			0.73872	0.81737	Diagnosis	Immature
chr1:22710228-22711137	ENSG00000133216_EPHB2,0	ENSG00000133216_EPHB2,0			0.265412	0.48183	Diagnosis	Immature
chr1:22722883-22723726		ENSG00000133216_EPHB2,12044			0.356821	0.530727	Diagnosis	Immature
chr1:22750082-22750860		ENSG00000133216_EPHB2,39243			0.313148	0.507328	Diagnosis	Immature
chr1:22751018-22751840		ENSG00000133216_EPHB2,40179			0.213776	0.456111	Diagnosis	Immature
chr1:22756015-22756878		ENSG00000133216_EPHB2,45176			0.393015	0.551464	Diagnosis	Immature
chr1:22761626-22762507		ENSG00000133216_EPHB2,50787			0.0499272	0.355407	Diagnosis	Immature
chr1:22771796-22772695		ENSG00000133216_EPHB2,60957			0.116925	0.408185	Diagnosis	Immature
chr1:22773865-22774767		ENSG00000133216_EPHB2,63026			0.230897	0.464412	Diagnosis	Immature
chr1:22778642-22779575		ENSG00000133216_EPHB2,67803			0.0224481	0.306529	Diagnosis	Immature
chr1:22786551-22787406		ENSG00000133216_EPHB2,75712			0.383787	0.545912	Diagnosis	Immature
chr1:22799765-22800673		ENSG00000133216_EPHB2,88926			0.145852	0.424094	Diagnosis	Immature
chr1:22806399-22807285		ENSG00000133216_EPHB2,95560			0.472464	0.602991	Diagnosis	Immature
chr1:22808572-22809415		ENSG00000133216_EPHB2,97733			0.831153	0.886653	Diagnosis	Immature
chr1:22814507-22815345		ENSG00000133216_EPHB2,103668			0.287419	0.493717	Diagnosis	Immature
chr1:22818636-22819536		ENSG00000133216_EPHB2,107797			0.489941	0.615774	Diagnosis	Immature
chr1:22828787-22829528		ENSG00000133216_EPHB2,117948			0.0916643	0.393271	Diagnosis	Immature
chr1:22829824-22830720		ENSG00000133216_EPHB2,118985			0.211808	0.455278	Diagnosis	Immature
chr1:22835596-22836452	ENSG00000225952_AL512444.1,397	ENSG00000225952_AL512444.1,397;ENSG00000133216_EPHB2,124757			0.796412	0.861374	Diagnosis	Immature
chr1:22841597-22842479		ENSG00000133216_EPHB2,130758			0.179355	0.439757	Diagnosis	Immature
chr1:22850395-22851285		ENSG00000133216_EPHB2,139556			0.764721	0.837182	Diagnosis	Immature
chr1:22854462-22855372		ENSG00000133216_EPHB2,143623			0.276648	0.487963	Diagnosis	Immature
chr1:22855810-22856707		ENSG00000133216_EPHB2,144971			0.190758	0.444635	Diagnosis	Immature
chr1:22860039-22860936		ENSG00000133216_EPHB2,149200			0.785577	0.853244	Diagnosis	Immature
chr1:22861729-22862608		ENSG00000133216_EPHB2,150890			0.13639	0.418743	Diagnosis	Immature
chr1:22875584-22876400		ENSG00000133216_EPHB2,164745			0.773681	0.844171	Diagnosis	Immature
chr1:22879925-22880787		ENSG00000133216_EPHB2,169086			0.0359815	0.337312	Diagnosis	Immature
chr1:22888901-22889773		ENSG00000133216_EPHB2,178062			0.190613	0.444608	Diagnosis	Immature
chr1:22916223-22917122		ENSG00000133216_EPHB2,205384			0.399481	0.555405	Diagnosis	Immature
chr1:23019050-23019910	ENSG00000004487_KDM1A,0	ENSG00000004487_KDM1A,0			0.0418733	0.344438	Diagnosis	Immature
chr1:23072147-23073022		ENSG00000240553_AL031428.1,15036;ENSG00000004487_KDM1A,52704			0.187726	0.443496	Diagnosis	Immature
chr1:23902477-23903411		ENSG00000188822_CNR2,9951			0.219834	0.459312	Diagnosis	Immature
chr1:31372965-31373683		ENSG00000121769_FABP3,3167			0.00453664	0.215877	Diagnosis	Immature
chr1:31376473-31377331	ENSG00000121769_FABP3,0	ENSG00000121769_FABP3,0			0.0998001	0.39766	Diagnosis	Immature
chr1:43528891-43529716		ENSG00000142949_PTPRF,3704			0.809682	0.871001	Diagnosis	Immature
chr1:43530513-43531274		ENSG00000142949_PTPRF,5326			0.111625	0.405165	Diagnosis	Immature
chr1:43531403-43531890		ENSG00000142949_PTPRF,6216			0.104797	0.400936	Diagnosis	Immature
chr1:43540480-43541283		ENSG00000142949_PTPRF,15293			0.0236283	0.309998	Diagnosis	Immature
chr1:43541826-43542687		ENSG00000142949_PTPRF,16639			0.00509002	0.221693	Diagnosis	Immature
chr1:43545498-43546398		ENSG00000142949_PTPRF,20311			0.489849	0.615728	Diagnosis	Immature
chr1:43547286-43548160		ENSG00000142949_PTPRF,22099			0.145022	0.423771	Diagnosis	Immature
chr1:43552562-43553480		ENSG00000142949_PTPRF,27375			0.173233	0.436418	Diagnosis	Immature
chr1:43558143-43559026		ENSG00000142949_PTPRF,32956			0.0946525	0.394757	Diagnosis	Immature
chr1:43563600-43564546		ENSG00000142949_PTPRF,38413			0.0481791	0.353549	Diagnosis	Immature
chr1:43565448-43566320		ENSG00000142949_PTPRF,40261			0.0116517	0.265072	Diagnosis	Immature
chr1:43573093-43573976		ENSG00000142949_PTPRF,47906			0.142798	0.42253	Diagnosis	Immature
chr1:43577449-43578256		ENSG00000142949_PTPRF,52262			0.875602	0.918516	Diagnosis	Immature
chr1:43582050-43582934		ENSG00000142949_PTPRF,56863			0.0556552	0.361963	Diagnosis	Immature
chr1:46393856-46394767	ENSG00000117480_FAAH,0	ENSG00000117480_FAAH,0			0.319361	0.510496	Diagnosis	Immature
chr1:46401851-46402688		ENSG00000117480_FAAH,7534			0.13223	0.416554	Diagnosis	Immature
chr1:46406004-46406926		ENSG00000117480_FAAH,11687			0.0141595	0.276236	Diagnosis	Immature
chr1:46413411-46414000		ENSG00000117480_FAAH,19094			0.877541	0.919942	Diagnosis	Immature
chr1:57016949-57017850		ENSG00000173406_DAB1,1528884			0.471671	0.602341	Diagnosis	Immature
chr1:57024625-57025548		ENSG00000173406_DAB1,1521186			0.789088	0.855969	Diagnosis	Immature
chr1:57040614-57041514		ENSG00000173406_DAB1,1505220			0.880499	0.921937	Diagnosis	Immature
chr1:57058698-57059592		ENSG00000173406_DAB1,1487142			0.261328	0.479948	Diagnosis	Immature
chr1:57063109-57064063		ENSG00000173406_DAB1,1482671			0.182028	0.441127	Diagnosis	Immature
chr1:57072297-57073150		ENSG00000173406_DAB1,1473584			0.405479	0.559187	Diagnosis	Immature
chr1:57082330-57083232		ENSG00000173406_DAB1,1463502			0.332297	0.517648	Diagnosis	Immature
chr1:57116760-57117660		ENSG00000173406_DAB1,1429074			0.30552	0.503219	Diagnosis	Immature
chr1:57124564-57125442		ENSG00000173406_DAB1,1421292			0.321582	0.511719	Diagnosis	Immature
chr1:57131764-57132552		ENSG00000173406_DAB1,1414182			0.415123	0.56512	Diagnosis	Immature
chr1:57162661-57163537		ENSG00000173406_DAB1,1383197			0.230003	0.464	Diagnosis	Immature
chr1:57205122-57205904		ENSG00000173406_DAB1,1340830			0.842814	0.89524	Diagnosis	Immature
chr1:57206028-57206726		ENSG00000173406_DAB1,1340008			0.871367	0.915492	Diagnosis	Immature
chr1:57252692-57253500		ENSG00000173406_DAB1,1293234			0.681082	0.771086	Diagnosis	Immature
chr1:57253897-57254743		ENSG00000173406_DAB1,1291991			0.434075	0.576785	Diagnosis	Immature
chr1:57258407-57259115		ENSG00000173406_DAB1,1287619			0.435304	0.577586	Diagnosis	Immature
chr1:57271896-57272791		ENSG00000173406_DAB1,1273943			0.0576895	0.364207	Diagnosis	Immature
chr1:57312588-57313498		ENSG00000173406_DAB1,1233236			0.711953	0.796155	Diagnosis	Immature
chr1:57321525-57322430		ENSG00000173406_DAB1,1224304			0.106265	0.40183	Diagnosis	Immature
chr1:57344287-57345167		ENSG00000173406_DAB1,1201567			0.21415	0.456318	Diagnosis	Immature
chr1:57407831-57408611		ENSG00000173406_DAB1,1138123			0.107903	0.403016	Diagnosis	Immature
chr1:57423762-57424526		ENSG00000173406_DAB1,1122208			0.0939687	0.394525	Diagnosis	Immature
chr1:57622904-57623684		ENSG00000173406_DAB1,923050			0.137953	0.419374	Diagnosis	Immature
chr1:57844749-57845617		ENSG00000173406_DAB1,701117			0.0985714	0.397146	Diagnosis	Immature
chr1:57860120-57860981	ENSG00000226759_DAB1-AS1,0	ENSG00000226759_DAB1-AS1,0;ENSG00000173406_DAB1,685753			0.0190485	0.295723	Diagnosis	Immature
chr1:57881748-57882488		ENSG00000173406_DAB1,664246			0.916731	0.945989	Diagnosis	Immature
chr1:57889367-57890278		ENSG00000173406_DAB1,656456			0.125375	0.412886	Diagnosis	Immature
chr1:57901125-57901986		ENSG00000173406_DAB1,644748			0.406795	0.559855	Diagnosis	Immature
chr1:57908166-57909106		ENSG00000173406_DAB1,637628			0.0066321	0.235689	Diagnosis	Immature
chr1:57959559-57960478		ENSG00000173406_DAB1,586256			0.0508311	0.356768	Diagnosis	Immature
chr1:57975924-57976853		ENSG00000173406_DAB1,569881			0.0314864	0.329316	Diagnosis	Immature
chr1:58059670-58060427	ENSG00000235038_AL445193.2,0	ENSG00000235038_AL445193.2,0;ENSG00000173406_DAB1,486307			0.205241	0.452146	Diagnosis	Immature
chr1:58063946-58064852		ENSG00000235038_AL445193.2,3807;ENSG00000173406_DAB1,481882			0.024099	0.311406	Diagnosis	Immature
chr1:58113229-58113947		ENSG00000173406_DAB1,432787			0.347709	0.52593	Diagnosis	Immature
chr1:58158210-58159121		ENSG00000173406_DAB1,387613			0.454478	0.590523	Diagnosis	Immature
chr1:58162753-58163609		ENSG00000173406_DAB1,383125			0.741521	0.819564	Diagnosis	Immature
chr1:58249886-58250728		ENSG00000173406_DAB1,296006			0.0169187	0.288616	Diagnosis	Immature
chr1:58279567-58280398		ENSG00000173406_DAB1,266336			0.111163	0.404687	Diagnosis	Immature
chr1:58282439-58283324		ENSG00000173406_DAB1,263410			0.991021	0.994571	Diagnosis	Immature
chr1:58325847-58326655		ENSG00000173406_DAB1,220079			0.23883	0.468582	Diagnosis	Immature
chr1:58358075-58358979		ENSG00000173406_DAB1,187755			0.31256	0.507012	Diagnosis	Immature
chr1:58409462-58410282		ENSG00000173406_DAB1,136452			0.250384	0.47417	Diagnosis	Immature
chr1:58430506-58431317		ENSG00000173406_DAB1,115417;ENSG00000162600_OMA1,115485			0.904981	0.93811	Diagnosis	Immature
chr1:58432618-58433496		ENSG00000173406_DAB1,113238;ENSG00000162600_OMA1,113306			0.538909	0.65307	Diagnosis	Immature
chr1:58439673-58440555		ENSG00000173406_DAB1,106179;ENSG00000162600_OMA1,106247			0.34228	0.523204	Diagnosis	Immature
chr1:58515636-58516508		ENSG00000173406_DAB1,30226;ENSG00000162600_OMA1,30294			0.119175	0.409732	Diagnosis	Immature
chr1:58546271-58547097	ENSG00000173406_DAB1,0;ENSG00000162600_OMA1,0;ENSG00000286918_AL035411.3,103	ENSG00000173406_DAB1,0;ENSG00000162600_OMA1,0;ENSG00000286918_AL035411.3,103			0.274394	0.486502	Diagnosis	Immature
chr1:65419976-65420912	ENSG00000213625_LEPROT,0;ENSG00000116678_LEPR,0	ENSG00000213625_LEPROT,0;ENSG00000116678_LEPR,0			0.0322732	0.331274	Diagnosis	Immature
chr1:65430834-65431748		ENSG00000116678_LEPR,10182;ENSG00000213625_LEPROT,10247			0.357077	0.530888	Diagnosis	Immature
chr1:65440561-65441394		ENSG00000116678_LEPR,19909			0.0653556	0.372623	Diagnosis	Immature
chr1:65458994-65459885		ENSG00000116678_LEPR,38342			0.218766	0.458743	Diagnosis	Immature
chr1:65468484-65469290		ENSG00000116678_LEPR,47832			0.218696	0.45866	Diagnosis	Immature
chr1:65525264-65526120		ENSG00000116678_LEPR,104612			0.0555506	0.361963	Diagnosis	Immature
chr1:65615532-65616376		ENSG00000116678_LEPR,194880			0.1615	0.430926	Diagnosis	Immature
chr1:65617114-65618032		ENSG00000116678_LEPR,196462			0.220415	0.459678	Diagnosis	Immature
chr1:115301225-115302112		ENSG00000228035_NGF-AS1,18191;ENSG00000134259_NGF,36124			0.448009	0.586109	Diagnosis	Immature
chr1:115313858-115314730		ENSG00000134259_NGF,23506;ENSG00000228035_NGF-AS1,30824			0.490354	0.61605	Diagnosis	Immature
chr1:115337596-115338522	ENSG00000134259_NGF,0	ENSG00000134259_NGF,0;ENSG00000228035_NGF-AS1,54562			0.00899418	0.24992	Diagnosis	Immature
chr1:119925069-119926002		ENSG00000134250_NOTCH2,174777			0.281639	0.490412	Diagnosis	Immature
chr1:119947022-119947799		ENSG00000134250_NOTCH2,152980			0.965278	0.978241	Diagnosis	Immature
chr1:119948352-119949251		ENSG00000134250_NOTCH2,151528			0.14895	0.4257	Diagnosis	Immature
chr1:119962036-119962921		ENSG00000134250_NOTCH2,137858			0.178747	0.439355	Diagnosis	Immature
chr1:119964761-119965671		ENSG00000134250_NOTCH2,135108			0.985835	0.991423	Diagnosis	Immature
chr1:119978087-119979019		ENSG00000134250_NOTCH2,121760			0.243598	0.471279	Diagnosis	Immature
chr1:119986664-119987556		ENSG00000134250_NOTCH2,113223			0.361675	0.533366	Diagnosis	Immature
chr1:154567468-154568390	ENSG00000286391_AL592078.2,0;ENSG00000160716_CHRNB2,0	ENSG00000286391_AL592078.2,0;ENSG00000160716_CHRNB2,0			0.390428	0.549999	Diagnosis	Immature
chr1:156082281-156083147	ENSG00000254726_MEX3A,0;ENSG00000160789_LMNA,0	ENSG00000254726_MEX3A,0;ENSG00000160789_LMNA,0			0.381791	0.544784	Diagnosis	Immature
chr1:156090435-156091280		ENSG00000160789_LMNA,7862			0.897628	0.933422	Diagnosis	Immature
chr1:156096415-156097258		ENSG00000160789_LMNA,13842			0.0775229	0.383506	Diagnosis	Immature
chr1:156106024-156106925		ENSG00000160789_LMNA,23451			0.273419	0.486075	Diagnosis	Immature
chr1:156114160-156115020		ENSG00000160789_LMNA,31587			0.0811489	0.386424	Diagnosis	Immature
chr1:156115536-156116487		ENSG00000160789_LMNA,32963			0.347426	0.525795	Diagnosis	Immature
chr1:156119445-156120299		ENSG00000160789_LMNA,36872			0.628243	0.72599	Diagnosis	Immature
chr1:156122402-156123122		ENSG00000160789_LMNA,39829			0.629641	0.727121	Diagnosis	Immature
chr1:156123431-156124307		ENSG00000160789_LMNA,40858			0.0374562	0.339896	Diagnosis	Immature
chr1:156126071-156126836		ENSG00000160789_LMNA,43498			0.314392	0.507819	Diagnosis	Immature
chr1:156130002-156130902		ENSG00000160789_LMNA,47429			0.0932618	0.394145	Diagnosis	Immature
chr1:156677822-156678588	ENSG00000132688_NES,-415				0.0762832	0.382531	Diagnosis	Immature
chr1:186680048-186680874	ENSG00000073756_PTGS2,0;ENSG00000273129_PACERR,0	ENSG00000073756_PTGS2,0;ENSG00000273129_PACERR,0			0.0152709	0.281706	Diagnosis	Immature
chr1:203305002-203305899	ENSG00000233791_LINC01136,0;ENSG00000159388_BTG2,0	ENSG00000233791_LINC01136,0;ENSG00000159388_BTG2,0			0.205745	0.452421	Diagnosis	Immature
chr1:203306524-203307175	ENSG00000233791_LINC01136,-1215;ENSG00000159388_BTG2,1033	ENSG00000159388_BTG2,1033			0.0602406	0.366803	Diagnosis	Immature
chr1:207454204-207455017	ENSG00000117322_CR2,0	ENSG00000117322_CR2,0			0.505689	0.627403	Diagnosis	Immature
chr1:213982687-213983562	ENSG00000117707_PROX1,0	ENSG00000117707_PROX1,0;ENSG00000230461_PROX1-AS1,4946			0.0318245	0.330488	Diagnosis	Immature
chr1:213987490-213988355	ENSG00000274895_AC011700.1,-1071;ENSG00000230461_PROX1-AS1,153	ENSG00000230461_PROX1-AS1,153;ENSG00000117707_PROX1,4309			0.137479	0.419016	Diagnosis	Immature
chr1:213996300-213997050		ENSG00000117707_PROX1,13119			0.132161	0.416487	Diagnosis	Immature
chr1:214002118-214002910		ENSG00000117707_PROX1,18937			0.502342	0.624814	Diagnosis	Immature
chr1:214008781-214009668		ENSG00000117707_PROX1,25600			0.348028	0.526075	Diagnosis	Immature
chr1:214019235-214020038		ENSG00000117707_PROX1,36054			0.2019	0.450575	Diagnosis	Immature
chr1:214030783-214031632	ENSG00000272167_AL606537.1,0	ENSG00000272167_AL606537.1,0;ENSG00000117707_PROX1,47602			0.2766	0.487934	Diagnosis	Immature
chr1:231626305-231627064	ENSG00000162946_DISC1,0	ENSG00000162946_DISC1,0			0.0670913	0.374483	Diagnosis	Immature
chr1:231627188-231627836	ENSG00000162946_DISC1,373	ENSG00000162946_DISC1,373			0.0812991	0.386424	Diagnosis	Immature
chr1:231635893-231636769		ENSG00000162946_DISC1,9078			0.248695	0.473442	Diagnosis	Immature
chr1:231640058-231640945		ENSG00000162946_DISC1,13243			0.134272	0.417371	Diagnosis	Immature
chr1:231642803-231643715		ENSG00000162946_DISC1,15988			0.0675662	0.375061	Diagnosis	Immature
chr1:231691444-231692297		ENSG00000162946_DISC1,64629			0.434504	0.577053	Diagnosis	Immature
chr1:231693866-231694766		ENSG00000162946_DISC1,67051			0.0888278	0.391393	Diagnosis	Immature
chr1:231695565-231696410		ENSG00000162946_DISC1,68750			0.0865356	0.389739	Diagnosis	Immature
chr1:231706699-231707598		ENSG00000162946_DISC1,79884			0.212658	0.45572	Diagnosis	Immature
chr1:231756550-231757439		ENSG00000162946_DISC1,129735			0.125426	0.412935	Diagnosis	Immature
chr1:231777796-231778722		ENSG00000286071_AL136171.2,68984;ENSG00000162946_DISC1,150981			0.86544	0.911316	Diagnosis	Immature
chr1:231779018-231779754		ENSG00000286071_AL136171.2,67952;ENSG00000162946_DISC1,152203			0.127251	0.41378	Diagnosis	Immature
chr1:231781777-231782522		ENSG00000286071_AL136171.2,65184;ENSG00000162946_DISC1,154962			0.169394	0.434908	Diagnosis	Immature
chr1:231795902-231796846		ENSG00000286071_AL136171.2,50860;ENSG00000162946_DISC1,169087			0.0254801	0.315089	Diagnosis	Immature
chr1:231803264-231804210		ENSG00000286071_AL136171.2,43496;ENSG00000162946_DISC1,176449			0.50978	0.630702	Diagnosis	Immature
chr1:231806451-231807318		ENSG00000286071_AL136171.2,40388;ENSG00000162946_DISC1,179636			0.225644	0.461867	Diagnosis	Immature
chr1:231861705-231862588		ENSG00000162946_DISC1,234890			0.469962	0.601043	Diagnosis	Immature
chr1:231866423-231867303		ENSG00000162946_DISC1,239608			0.164324	0.432818	Diagnosis	Immature
chr1:231882695-231883458		ENSG00000162946_DISC1,255880			0.981847	0.988809	Diagnosis	Immature
chr1:231919441-231920287		ENSG00000162946_DISC1,292626			0.160605	0.430773	Diagnosis	Immature
chr1:231923434-231924169	ENSG00000226758_DISC1-IT1,-1665	ENSG00000162946_DISC1,296619			0.136371	0.418743	Diagnosis	Immature
chr1:231929145-231929967		ENSG00000226758_DISC1-IT1,3311;ENSG00000162946_DISC1,302330			0.969067	0.980768	Diagnosis	Immature
chr1:231934623-231935504		ENSG00000226758_DISC1-IT1,8789;ENSG00000162946_DISC1,307808			0.283932	0.491827	Diagnosis	Immature
chr1:231937300-231938064		ENSG00000226758_DISC1-IT1,11466;ENSG00000162946_DISC1,310485			0.220737	0.459813	Diagnosis	Immature
chr1:231949045-231949947		ENSG00000162946_DISC1,322230			0.324641	0.513566	Diagnosis	Immature
chr1:232012595-232013534		ENSG00000162946_DISC1,385780			0.55312	0.664291	Diagnosis	Immature
chr1:232029073-232029968		ENSG00000162946_DISC1,402258			0.204132	0.451697	Diagnosis	Immature
chr10:44384734-44385360	ENSG00000107562_CXCL12,1133	ENSG00000107562_CXCL12,1133			0.0274562	0.321039	Diagnosis	Immature
chr10:44386279-44387206	ENSG00000107562_CXCL12,0	ENSG00000107562_CXCL12,0			0.0416966	0.344209	Diagnosis	Immature
chr10:52314012-52314931	ENSG00000107984_DKK1,0;ENSG00000236671_PRKG1-AS1,0	ENSG00000236671_PRKG1-AS1,0;ENSG00000107984_DKK1,0			0.282473	0.490971	Diagnosis	Immature
chr10:67884310-67885140	ENSG00000096717_SIRT1,0	ENSG00000096717_SIRT1,0			0.0103643	0.258354	Diagnosis	Immature
chr10:68560050-68560870	ENSG00000138336_TET1,0	ENSG00000138336_TET1,0			0.643862	0.739632	Diagnosis	Immature
chr10:68598913-68599558		ENSG00000138336_TET1,38576			0.260953	0.479803	Diagnosis	Immature
chr10:68600026-68600899		ENSG00000138336_TET1,39689			0.0984473	0.397001	Diagnosis	Immature
chr10:73906363-73907274	ENSG00000122861_PLAU,-1903				0.206549	0.452809	Diagnosis	Immature
chr10:73910772-73911668	ENSG00000122861_PLAU,1595	ENSG00000122861_PLAU,1595;ENSG00000222047_C10orf55,11109			0.686237	0.775338	Diagnosis	Immature
chr10:86755998-86756921	ENSG00000272631_AC067750.1,0;ENSG00000107779_BMPR1A,0	ENSG00000272631_AC067750.1,0;ENSG00000107779_BMPR1A,0			0.050922	0.356854	Diagnosis	Immature
chr10:86773234-86774132		ENSG00000107779_BMPR1A,16633			0.215942	0.457366	Diagnosis	Immature
chr10:86775336-86776129		ENSG00000107779_BMPR1A,18735			0.697597	0.784436	Diagnosis	Immature
chr10:86865649-86866577		ENSG00000107779_BMPR1A,109048			0.073265	0.380062	Diagnosis	Immature
chr10:86872726-86873580		ENSG00000107779_BMPR1A,116125			0.477116	0.606139	Diagnosis	Immature
chr10:86899301-86900038		ENSG00000107779_BMPR1A,142700			0.185898	0.442708	Diagnosis	Immature
chr10:86900730-86901601		ENSG00000107779_BMPR1A,144129			0.918664	0.947173	Diagnosis	Immature
chr10:86905187-86905991		ENSG00000107779_BMPR1A,148586			0.421073	0.568708	Diagnosis	Immature
chr10:86917885-86918791		ENSG00000107779_BMPR1A,161284			0.0135925	0.273077	Diagnosis	Immature
chr10:86929451-86930216		ENSG00000107779_BMPR1A,172850			0.304076	0.502363	Diagnosis	Immature
chr10:87861882-87862647	ENSG00000171862_PTEN,-978;ENSG00000227268_KLLN,790	ENSG00000227268_KLLN,790			0.00958008	0.253093	Diagnosis	Immature
chr10:87863163-87863996	ENSG00000227268_KLLN,0;ENSG00000171862_PTEN,0	ENSG00000227268_KLLN,0;ENSG00000171862_PTEN,0			0.00622155	0.232369	Diagnosis	Immature
chr10:88990489-88991268	ENSG00000026103_FAS,0;ENSG00000107796_ACTA2,71	ENSG00000026103_FAS,0;ENSG00000107796_ACTA2,71;ENSG00000286116_AL157394.3,2981			0.081902	0.386641	Diagnosis	Immature
chr10:111075995-111076646	ENSG00000150594_ADRA2A,-383				0.0382978	0.340835	Diagnosis	Immature
chr10:111076760-111077295	ENSG00000150594_ADRA2A,0	ENSG00000150594_ADRA2A,0			0.0644531	0.371609	Diagnosis	Immature
chr10:113679084-113679400	ENSG00000165806_CASP7,0	ENSG00000165806_CASP7,0			0.159352	0.430306	Diagnosis	Immature
chr10:113679497-113680097	ENSG00000165806_CASP7,335	ENSG00000165806_CASP7,335			0.105716	0.40151	Diagnosis	Immature
chr10:113704962-113705577		ENSG00000165806_CASP7,25800			0.432664	0.575897	Diagnosis	Immature
chr10:113705694-113706243		ENSG00000165806_CASP7,26532			0.866085	0.911808	Diagnosis	Immature
chr10:113710938-113711767		ENSG00000234393_AL592546.2,7565;ENSG00000165806_CASP7,31776			0.535886	0.650882	Diagnosis	Immature
chr10:117241228-117242005	ENSG00000225936_AL731557.1,0;ENSG00000165646_SLC18A2,135	ENSG00000225936_AL731557.1,0;ENSG00000165646_SLC18A2,135			0.0817523	0.386463	Diagnosis	Immature
chr10:121485480-121486345		ENSG00000066468_FGFR2,112113			0.0155206	0.283004	Diagnosis	Immature
chr10:121501582-121502401		ENSG00000066468_FGFR2,96057			0.136941	0.418886	Diagnosis	Immature
chr10:121509836-121510772		ENSG00000066468_FGFR2,87686			0.415454	0.565254	Diagnosis	Immature
chr10:121519596-121520473		ENSG00000066468_FGFR2,77985			0.154797	0.428206	Diagnosis	Immature
chr10:121523464-121524241		ENSG00000066468_FGFR2,74217			0.614491	0.71457	Diagnosis	Immature
chr10:121532195-121533116		ENSG00000066468_FGFR2,65342			0.00902326	0.250102	Diagnosis	Immature
chr10:121535061-121535769		ENSG00000066468_FGFR2,62689			0.856107	0.904808	Diagnosis	Immature
chr10:121536056-121536968		ENSG00000066468_FGFR2,61490			0.140068	0.420815	Diagnosis	Immature
chr10:121539658-121540470		ENSG00000066468_FGFR2,57988			0.0919439	0.393301	Diagnosis	Immature
chr10:121553565-121554360		ENSG00000066468_FGFR2,44098			0.356568	0.530557	Diagnosis	Immature
chr10:121559305-121560125		ENSG00000066468_FGFR2,38333			0.385699	0.547016	Diagnosis	Immature
chr10:121566462-121567351		ENSG00000066468_FGFR2,31107			0.0795683	0.385066	Diagnosis	Immature
chr10:121593236-121593911		ENSG00000066468_FGFR2,4547			0.225144	0.461576	Diagnosis	Immature
chr10:121595820-121596639	ENSG00000066468_FGFR2,1819	ENSG00000066468_FGFR2,1819			0.0447248	0.348578	Diagnosis	Immature
chr10:121598090-121598990	ENSG00000066468_FGFR2,0	ENSG00000066468_FGFR2,0			0.0106566	0.260697	Diagnosis	Immature
chr11:535214-536126	ENSG00000161328_LRRC56,-1401;ENSG00000174775_HRAS,1161	ENSG00000174775_HRAS,1161			0.0186947	0.294527	Diagnosis	Immature
chr11:4094284-4095208	ENSG00000167325_RRM1,0	ENSG00000167325_RRM1,0			0.0120869	0.267781	Diagnosis	Immature
chr11:13277150-13278057	ENSG00000133794_ARNTL,498	ENSG00000133794_ARNTL,498			0.00427286	0.212613	Diagnosis	Immature
chr11:13286681-13287492		ENSG00000133794_ARNTL,10029			0.0314493	0.329316	Diagnosis	Immature
chr11:13291538-13292411		ENSG00000133794_ARNTL,14886			0.220071	0.459462	Diagnosis	Immature
chr11:13297611-13298395		ENSG00000133794_ARNTL,20959			0.353503	0.528932	Diagnosis	Immature
chr11:13302027-13302972		ENSG00000133794_ARNTL,25375			0.281464	0.490304	Diagnosis	Immature
chr11:13306211-13307085		ENSG00000133794_ARNTL,29559			0.152879	0.427488	Diagnosis	Immature
chr11:13316164-13316993		ENSG00000133794_ARNTL,39512			0.335658	0.519374	Diagnosis	Immature
chr11:13329725-13330650		ENSG00000133794_ARNTL,53073			0.504226	0.626217	Diagnosis	Immature
chr11:13337893-13338652		ENSG00000133794_ARNTL,61241			0.885974	0.925715	Diagnosis	Immature
chr11:13339148-13340090		ENSG00000133794_ARNTL,62496			0.23212	0.465245	Diagnosis	Immature
chr11:13343830-13344725		ENSG00000133794_ARNTL,67178			0.112121	0.405371	Diagnosis	Immature
chr11:13368016-13368880		ENSG00000133794_ARNTL,91364			0.377607	0.542275	Diagnosis	Immature
chr11:13384771-13385537		ENSG00000133794_ARNTL,108119			0.225358	0.461706	Diagnosis	Immature
chr11:27698746-27699617		ENSG00000176697_BDNF,22441;ENSG00000255496_AC103796.1,178031			0.0532515	0.359702	Diagnosis	Immature
chr11:27701306-27702132		ENSG00000176697_BDNF,19926;ENSG00000255496_AC103796.1,175516			0.794157	0.859771	Diagnosis	Immature
chr11:27722427-27723185	ENSG00000176697_BDNF,-369	ENSG00000255496_AC103796.1,154463			0.309977	0.505635	Diagnosis	Immature
chr11:31786928-31787834		ENSG00000007372_PAX6,30127;ENSG00000109911_ELP4,277173			0.230336	0.464133	Diagnosis	Immature
chr11:31798723-31799499		ENSG00000007372_PAX6,18462			0.282059	0.490709	Diagnosis	Immature
chr11:31805630-31806471		ENSG00000007372_PAX6,11490			0.906408	0.939099	Diagnosis	Immature
chr11:31809777-31810581	ENSG00000281880_PAUPAR,-1726	ENSG00000007372_PAX6,7380			0.116778	0.408185	Diagnosis	Immature
chr11:31811004-31811833	ENSG00000281880_PAUPAR,-474	ENSG00000007372_PAX6,6128			0.368351	0.537039	Diagnosis	Immature
chr11:31817644-31818558	ENSG00000007372_PAX6,0	ENSG00000007372_PAX6,0;ENSG00000281880_PAUPAR,5337			0.148075	0.425207	Diagnosis	Immature
chr11:35261946-35262799		ENSG00000110436_SLC1A2,157264			0.931211	0.955533	Diagnosis	Immature
chr11:35268415-35269288		ENSG00000110436_SLC1A2,150775			0.144337	0.423485	Diagnosis	Immature
chr11:35275235-35276144		ENSG00000110436_SLC1A2,143919			0.14648	0.424391	Diagnosis	Immature
chr11:35276366-35277163		ENSG00000110436_SLC1A2,142900			0.268008	0.483238	Diagnosis	Immature
chr11:35292110-35292944		ENSG00000110436_SLC1A2,127119			0.229478	0.463774	Diagnosis	Immature
chr11:35303749-35304678		ENSG00000110436_SLC1A2,115385			0.131527	0.416027	Diagnosis	Immature
chr11:35307076-35307878		ENSG00000110436_SLC1A2,112185			0.153932	0.427838	Diagnosis	Immature
chr11:35313154-35314066		ENSG00000110436_SLC1A2,105997			0.20265	0.450985	Diagnosis	Immature
chr11:35336921-35337846		ENSG00000110436_SLC1A2,82217			0.0957003	0.395184	Diagnosis	Immature
chr11:35344935-35345658		ENSG00000110436_SLC1A2,74405			0.321123	0.511498	Diagnosis	Immature
chr11:35362893-35363604		ENSG00000110436_SLC1A2,56459			0.808411	0.869992	Diagnosis	Immature
chr11:35363744-35364609		ENSG00000110436_SLC1A2,55454			0.05563	0.361963	Diagnosis	Immature
chr11:35372936-35373677		ENSG00000110436_SLC1A2,46386			0.242285	0.47053	Diagnosis	Immature
chr11:35380320-35381165		ENSG00000110436_SLC1A2,38898			0.109517	0.404193	Diagnosis	Immature
chr11:35387117-35387898		ENSG00000110436_SLC1A2,32165			0.223797	0.461129	Diagnosis	Immature
chr11:35392038-35392879		ENSG00000110436_SLC1A2,27184			0.783167	0.851476	Diagnosis	Immature
chr11:35404182-35405077		ENSG00000110436_SLC1A2,14986			0.371219	0.538681	Diagnosis	Immature
chr11:35412176-35413050		ENSG00000110436_SLC1A2,7013			0.596916	0.699781	Diagnosis	Immature
chr11:35418000-35418779	ENSG00000255542_AC090625.2,-278;ENSG00000110436_SLC1A2,1284	ENSG00000110436_SLC1A2,1284			0.617476	0.717049	Diagnosis	Immature
chr11:35419153-35419931	ENSG00000255542_AC090625.2,96;ENSG00000110436_SLC1A2,132	ENSG00000255542_AC090625.2,96;ENSG00000110436_SLC1A2,132			0.205331	0.452146	Diagnosis	Immature
chr11:36509750-36510632	ENSG00000166349_RAG1,-77;ENSG00000175104_TRAF6,0	ENSG00000175104_TRAF6,0			0.523831	0.641375	Diagnosis	Immature
chr11:36540760-36541646		ENSG00000166349_RAG1,30051			0.157942	0.429833	Diagnosis	Immature
chr11:36564232-36565102		ENSG00000166349_RAG1,53523			0.119272	0.409802	Diagnosis	Immature
chr11:62921072-62921861	ENSG00000168539_CHRM1,0	ENSG00000168539_CHRM1,0			0.0176799	0.291597	Diagnosis	Immature
chr11:62923144-62923960	ENSG00000168539_CHRM1,-1337				0.0362874	0.337717	Diagnosis	Immature
chr11:64234113-64234939	ENSG00000256116_AP001453.1,0;ENSG00000173511_VEGFB,0	ENSG00000256116_AP001453.1,0;ENSG00000173511_VEGFB,0;ENSG00000110011_DNAJC4,3835			0.0677216	0.375143	Diagnosis	Immature
chr11:65662707-65663574	ENSG00000285533_RELA-DT,0;ENSG00000173039_RELA,0	ENSG00000173039_RELA,0;ENSG00000285533_RELA-DT,0			0.0332039	0.33298	Diagnosis	Immature
chr11:69638738-69639614	ENSG00000110092_CCND1,-1473				0.546356	0.65884	Diagnosis	Immature
chr11:69640656-69641507	ENSG00000110092_CCND1,0	ENSG00000110092_CCND1,0			0.0604728	0.3673	Diagnosis	Immature
chr11:69643005-69643787	ENSG00000110092_CCND1,1918	ENSG00000110092_CCND1,1918			0.0333073	0.333145	Diagnosis	Immature
chr11:69644235-69644993		ENSG00000110092_CCND1,3148			0.650874	0.745652	Diagnosis	Immature
chr11:72239434-72240355		ENSG00000165462_PHOX2A,5309			0.133256	0.417045	Diagnosis	Immature
chr11:88508623-88509478		ENSG00000255082_GRM5-AS1,4047;ENSG00000168959_GRM5,556467			0.199241	0.449029	Diagnosis	Immature
chr11:88521292-88522203		ENSG00000255082_GRM5-AS1,16716;ENSG00000168959_GRM5,543742			0.154097	0.427906	Diagnosis	Immature
chr11:88544099-88544990		ENSG00000168959_GRM5,520955			0.166404	0.433831	Diagnosis	Immature
chr11:88552316-88553050		ENSG00000168959_GRM5,512895			0.499232	0.622465	Diagnosis	Immature
chr11:88553174-88553870		ENSG00000168959_GRM5,512075			0.508731	0.62991	Diagnosis	Immature
chr11:88620456-88621220		ENSG00000168959_GRM5,444725			0.312464	0.506983	Diagnosis	Immature
chr11:88661223-88661981		ENSG00000168959_GRM5,403964			0.115035	0.407485	Diagnosis	Immature
chr11:88695638-88696586		ENSG00000168959_GRM5,369359			0.903614	0.937277	Diagnosis	Immature
chr11:88709347-88710268		ENSG00000168959_GRM5,355677			0.571681	0.679065	Diagnosis	Immature
chr11:88720464-88721268		ENSG00000168959_GRM5,344677			0.263309	0.480839	Diagnosis	Immature
chr11:88779392-88780295		ENSG00000168959_GRM5,285650			0.929046	0.953989	Diagnosis	Immature
chr11:88799524-88800392		ENSG00000168959_GRM5,265553			0.970776	0.981817	Diagnosis	Immature
chr11:88860196-88861084		ENSG00000168959_GRM5,204861			0.2771	0.488112	Diagnosis	Immature
chr11:89062471-89063207		ENSG00000168959_GRM5,2738			0.186931	0.443202	Diagnosis	Immature
chr11:89063341-89064128	ENSG00000168959_GRM5,1817	ENSG00000168959_GRM5,1817			0.0911778	0.392919	Diagnosis	Immature
chr11:89065419-89066232	ENSG00000168959_GRM5,0	ENSG00000168959_GRM5,0			0.179942	0.439988	Diagnosis	Immature
chr11:94543696-94544639	ENSG00000196371_FUT4,0;ENSG00000134627_PIWIL4,0	ENSG00000196371_FUT4,0;ENSG00000134627_PIWIL4,0			0.687614	0.776495	Diagnosis	Immature
chr11:101127065-101127889	ENSG00000282728_PGR-AS1,-1188;ENSG00000082175_PGR,1924	ENSG00000082175_PGR,1924			0.509735	0.630668	Diagnosis	Immature
chr11:101129224-101130088	ENSG00000082175_PGR,0;ENSG00000282728_PGR-AS1,147	ENSG00000082175_PGR,0;ENSG00000282728_PGR-AS1,147			0.280292	0.489749	Diagnosis	Immature
chr11:105034695-105035557	ENSG00000137752_CASP1,0	ENSG00000137752_CASP1,0			0.525655	0.642796	Diagnosis	Immature
chr11:108222424-108223336	ENSG00000149311_ATM,0;ENSG00000149308_NPAT,0	ENSG00000149308_NPAT,0;ENSG00000149311_ATM,0			0.00170928	0.184273	Diagnosis	Immature
chr11:108312671-108313182		ENSG00000149311_ATM,90187;ENSG00000166323_C11orf65,154349			0.206033	0.452525	Diagnosis	Immature
chr11:108367871-108368736		ENSG00000166323_C11orf65,98795;ENSG00000149311_ATM,145387			0.143795	0.423257	Diagnosis	Immature
chr11:109865482-109866404		ENSG00000137710_RDX,430308			0.614651	0.714702	Diagnosis	Immature
chr11:109938966-109939873		ENSG00000137710_RDX,356839			0.614027	0.714173	Diagnosis	Immature
chr11:109946042-109946928	ENSG00000287245_AP001981.2,0	ENSG00000287245_AP001981.2,0;ENSG00000137710_RDX,349784			0.0543722	0.360871	Diagnosis	Immature
chr11:109970818-109971637		ENSG00000287245_AP001981.2,24237;ENSG00000137710_RDX,325075			0.994613	0.99666	Diagnosis	Immature
chr11:109972168-109972932		ENSG00000287245_AP001981.2,25587;ENSG00000137710_RDX,323780			0.197649	0.448227	Diagnosis	Immature
chr11:109998639-109999398		ENSG00000137710_RDX,297314			0.438579	0.579765	Diagnosis	Immature
chr11:110021872-110022773		ENSG00000137710_RDX,273939			0.246729	0.472608	Diagnosis	Immature
chr11:110026884-110027800		ENSG00000137710_RDX,268912			0.25184	0.47501	Diagnosis	Immature
chr11:110032122-110032944		ENSG00000137710_RDX,263768			0.00577927	0.227797	Diagnosis	Immature
chr11:110068945-110069760		ENSG00000137710_RDX,226952			0.504961	0.626863	Diagnosis	Immature
chr11:110077522-110078389		ENSG00000137710_RDX,218323			0.65892	0.752507	Diagnosis	Immature
chr11:110085158-110086054		ENSG00000137710_RDX,210658			0.30223	0.501304	Diagnosis	Immature
chr11:110092756-110093513	ENSG00000149289_ZC3H12C,0	ENSG00000149289_ZC3H12C,0;ENSG00000137710_RDX,203199			0.025311	0.314844	Diagnosis	Immature
chr11:110100456-110101357		ENSG00000149289_ZC3H12C,7064;ENSG00000137710_RDX,195355			0.673535	0.764882	Diagnosis	Immature
chr11:110127859-110128735		ENSG00000149289_ZC3H12C,34467;ENSG00000137710_RDX,167977			0.196546	0.447615	Diagnosis	Immature
chr11:110130405-110131323		ENSG00000149289_ZC3H12C,37013;ENSG00000137710_RDX,165389			0.972594	0.982976	Diagnosis	Immature
chr11:110133877-110134790		ENSG00000149289_ZC3H12C,40485;ENSG00000137710_RDX,161922			0.0437384	0.34706	Diagnosis	Immature
chr11:110172280-110173089		ENSG00000137710_RDX,123623			0.175048	0.437142	Diagnosis	Immature
chr11:110173878-110174753		ENSG00000137710_RDX,121959			0.316235	0.508778	Diagnosis	Immature
chr11:110175226-110176139		ENSG00000137710_RDX,120573			0.0447869	0.348578	Diagnosis	Immature
chr11:110184918-110185852		ENSG00000137710_RDX,110860			0.245236	0.471989	Diagnosis	Immature
chr11:110201127-110202022		ENSG00000137710_RDX,94690			0.710715	0.795185	Diagnosis	Immature
chr11:110218853-110219732		ENSG00000137710_RDX,76980			0.140914	0.421311	Diagnosis	Immature
chr11:110296167-110297008	ENSG00000137710_RDX,0	ENSG00000137710_RDX,0			0.0685795	0.375778	Diagnosis	Immature
chr11:112960963-112961764	ENSG00000149294_NCAM1,0;ENSG00000247416_AP000802.1,1696	ENSG00000149294_NCAM1,0;ENSG00000247416_AP000802.1,1696			0.0317062	0.330123	Diagnosis	Immature
chr11:112962711-112963604	ENSG00000247416_AP000802.1,0;ENSG00000149294_NCAM1,1464	ENSG00000247416_AP000802.1,0;ENSG00000149294_NCAM1,1464			0.0067216	0.236926	Diagnosis	Immature
chr11:112977461-112978365		ENSG00000149294_NCAM1,16214			0.058317	0.365037	Diagnosis	Immature
chr11:113014525-113015324		ENSG00000149294_NCAM1,53278			0.149387	0.425812	Diagnosis	Immature
chr11:113021653-113022560		ENSG00000149294_NCAM1,60406			0.246866	0.472691	Diagnosis	Immature
chr11:113048910-113049792		ENSG00000149294_NCAM1,87663			0.303528	0.501913	Diagnosis	Immature
chr11:113090956-113091905		ENSG00000149294_NCAM1,129709			0.991924	0.994977	Diagnosis	Immature
chr11:113114140-113114975		ENSG00000149294_NCAM1,152893			0.87763	0.92	Diagnosis	Immature
chr11:113119027-113119764		ENSG00000149294_NCAM1,157780			0.214525	0.456616	Diagnosis	Immature
chr11:113132489-113133394		ENSG00000149294_NCAM1,171242			0.266184	0.482242	Diagnosis	Immature
chr11:113137794-113138675		ENSG00000149294_NCAM1,176547			0.0992218	0.397412	Diagnosis	Immature
chr11:113142176-113143074		ENSG00000149294_NCAM1,180929			0.306074	0.503493	Diagnosis	Immature
chr11:113146991-113147874		ENSG00000149294_NCAM1,185744			0.0528926	0.359345	Diagnosis	Immature
chr11:113148703-113149532		ENSG00000149294_NCAM1,187456			0.0498485	0.355358	Diagnosis	Immature
chr11:113160106-113160766		ENSG00000149294_NCAM1,198859			0.553026	0.664229	Diagnosis	Immature
chr11:113162332-113163145		ENSG00000149294_NCAM1,201085			0.172052	0.436101	Diagnosis	Immature
chr11:113163542-113164302		ENSG00000149294_NCAM1,202295			0.271205	0.484935	Diagnosis	Immature
chr11:113167256-113168065		ENSG00000149294_NCAM1,206009			0.199589	0.449137	Diagnosis	Immature
chr11:113182162-113183015		ENSG00000149294_NCAM1,220915			0.598174	0.700798	Diagnosis	Immature
chr11:113203096-113203999		ENSG00000149294_NCAM1,241849			0.204135	0.451697	Diagnosis	Immature
chr11:113234732-113235602		ENSG00000149294_NCAM1,273485			0.0568651	0.363319	Diagnosis	Immature
chr11:113242740-113243542		ENSG00000149294_NCAM1,281493			0.0593799	0.365931	Diagnosis	Immature
chr11:113261782-113262646		ENSG00000149294_NCAM1,300535			0.25731	0.477995	Diagnosis	Immature
chr11:113267255-113268133		ENSG00000227487_NCAM1-AS1,5899;ENSG00000149294_NCAM1,306008			0.117425	0.408638	Diagnosis	Immature
chr11:113274487-113275373	ENSG00000227487_NCAM1-AS1,-455	ENSG00000149294_NCAM1,313240			0.0537653	0.360317	Diagnosis	Immature
chr11:113434916-113435810		ENSG00000149295_DRD2,39881			0.106659	0.402146	Diagnosis	Immature
chr11:113474248-113474904	ENSG00000149295_DRD2,787	ENSG00000149295_DRD2,787			0.125988	0.413179	Diagnosis	Immature
chr11:113475023-113475595	ENSG00000149295_DRD2,96	ENSG00000149295_DRD2,96			0.249506	0.473742	Diagnosis	Immature
chr11:121451781-121452704	ENSG00000137642_SORL1,0;ENSG00000246790_AP000977.1,309	ENSG00000137642_SORL1,0;ENSG00000246790_AP000977.1,309			0.0052317	0.222892	Diagnosis	Immature
chr11:121456794-121457409		ENSG00000137642_SORL1,4480			0.509269	0.630331	Diagnosis	Immature
chr11:121464306-121465067		ENSG00000137642_SORL1,11992			0.0253823	0.314989	Diagnosis	Immature
chr11:121466349-121467174		ENSG00000137642_SORL1,14035			0.0638417	0.370765	Diagnosis	Immature
chr11:121472840-121473694		ENSG00000137642_SORL1,20526			0.666926	0.759225	Diagnosis	Immature
chr11:121482152-121483021		ENSG00000137642_SORL1,29838			0.254647	0.476546	Diagnosis	Immature
chr11:121487835-121488604		ENSG00000137642_SORL1,35521			0.435709	0.577844	Diagnosis	Immature
chr11:121494452-121495350		ENSG00000137642_SORL1,42138			0.711693	0.795974	Diagnosis	Immature
chr11:121508174-121509081		ENSG00000137642_SORL1,55860			0.913527	0.94383	Diagnosis	Immature
chr11:121512571-121513432		ENSG00000137642_SORL1,60257			0.117059	0.408217	Diagnosis	Immature
chr11:121523821-121524706		ENSG00000137642_SORL1,71507			0.45526	0.591121	Diagnosis	Immature
chr11:121533779-121534558		ENSG00000137642_SORL1,81465			0.0810917	0.386424	Diagnosis	Immature
chr11:121566288-121567178		ENSG00000137642_SORL1,113974			0.23059	0.464258	Diagnosis	Immature
chr11:121572324-121573264		ENSG00000137642_SORL1,120010			0.078231	0.384161	Diagnosis	Immature
chr11:121574943-121575818		ENSG00000137642_SORL1,122629			0.0944303	0.394757	Diagnosis	Immature
chr11:121576373-121577197		ENSG00000137642_SORL1,124059			0.358809	0.53184	Diagnosis	Immature
chr11:121578339-121579243		ENSG00000137642_SORL1,126025			0.590704	0.694607	Diagnosis	Immature
chr11:121582085-121582930		ENSG00000137642_SORL1,129771			0.2159	0.457338	Diagnosis	Immature
chr11:121585644-121586463		ENSG00000137642_SORL1,133330			0.596601	0.699479	Diagnosis	Immature
chr11:121589724-121590646		ENSG00000137642_SORL1,137410			0.560868	0.670436	Diagnosis	Immature
chr11:121591102-121592019		ENSG00000137642_SORL1,138788			0.449666	0.587204	Diagnosis	Immature
chr11:121595464-121596104		ENSG00000137642_SORL1,143150			0.769226	0.840681	Diagnosis	Immature
chr11:121610551-121611402		ENSG00000137642_SORL1,158237			0.399022	0.55515	Diagnosis	Immature
chr11:121613393-121614273		ENSG00000137642_SORL1,161079			0.116786	0.408185	Diagnosis	Immature
chr11:121617814-121618666		ENSG00000137642_SORL1,165500			0.252927	0.475584	Diagnosis	Immature
chr11:121625646-121626478		ENSG00000137642_SORL1,173332			0.203911	0.451605	Diagnosis	Immature
chr12:1972506-1973363	ENSG00000151067_CACNA1C,1720	ENSG00000151067_CACNA1C,1720;ENSG00000151065_DCP1B,31172			0.929457	0.954245	Diagnosis	Immature
chr12:2004063-2004960	ENSG00000151065_DCP1B,0;ENSG00000203593_AC005342.1,0	ENSG00000151065_DCP1B,0;ENSG00000203593_AC005342.1,0;ENSG00000151067_CACNA1C,33277			0.0357502	0.336658	Diagnosis	Immature
chr12:2013737-2014589		ENSG00000151067_CACNA1C,42951			0.559655	0.669404	Diagnosis	Immature
chr12:2026102-2026961		ENSG00000151067_CACNA1C,55316			0.188512	0.44386	Diagnosis	Immature
chr12:2034727-2035596		ENSG00000151067_CACNA1C,63941			0.00949797	0.252727	Diagnosis	Immature
chr12:2036149-2036862		ENSG00000151067_CACNA1C,65363			0.323238	0.5128	Diagnosis	Immature
chr12:2052495-2053334		ENSG00000151067_CACNA1C,81709			0.0582946	0.365037	Diagnosis	Immature
chr12:2053869-2054600		ENSG00000151067_CACNA1C,83083			0.201749	0.450499	Diagnosis	Immature
chr12:2082099-2082965		ENSG00000151067_CACNA1C,111313			0.623867	0.722417	Diagnosis	Immature
chr12:2113456-2114386		ENSG00000151067_CACNA1C,142670			0.0750163	0.381592	Diagnosis	Immature
chr12:2154168-2154897		ENSG00000151067_CACNA1C,183382			0.10916	0.403978	Diagnosis	Immature
chr12:2163263-2164168		ENSG00000151067_CACNA1C,192477			0.948635	0.967179	Diagnosis	Immature
chr12:2176714-2177474		ENSG00000151067_CACNA1C,205928			0.133002	0.416945	Diagnosis	Immature
chr12:2179918-2180837		ENSG00000151067_CACNA1C,209132			0.296564	0.498512	Diagnosis	Immature
chr12:2183577-2184493		ENSG00000151067_CACNA1C,212791			0.310569	0.506005	Diagnosis	Immature
chr12:2197880-2198821		ENSG00000151067_CACNA1C,227094			0.270595	0.484624	Diagnosis	Immature
chr12:2199738-2200473		ENSG00000151067_CACNA1C,228952			0.109995	0.404245	Diagnosis	Immature
chr12:2213114-2213991		ENSG00000151067_CACNA1C,242328			0.0129072	0.27024	Diagnosis	Immature
chr12:2220959-2221870	ENSG00000256025_CACNA1C-AS4,1609	ENSG00000256025_CACNA1C-AS4,1609;ENSG00000151067_CACNA1C,250173			0.817364	0.876607	Diagnosis	Immature
chr12:2239159-2240057		ENSG00000151067_CACNA1C,268373			0.493707	0.61843	Diagnosis	Immature
chr12:2243873-2244756		ENSG00000151067_CACNA1C,273087			0.0892565	0.391656	Diagnosis	Immature
chr12:2248116-2248984		ENSG00000151067_CACNA1C,277330			0.733497	0.813244	Diagnosis	Immature
chr12:2254983-2255901		ENSG00000151067_CACNA1C,284197			0.237806	0.468068	Diagnosis	Immature
chr12:2256721-2257552		ENSG00000151067_CACNA1C,285935			0.051897	0.358108	Diagnosis	Immature
chr12:2265403-2266318		ENSG00000151067_CACNA1C,294617			0.264768	0.481522	Diagnosis	Immature
chr12:2268405-2269232	ENSG00000256721_CACNA1C-IT3,-544	ENSG00000151067_CACNA1C,297619			0.498662	0.62202	Diagnosis	Immature
chr12:2271847-2272661		ENSG00000256721_CACNA1C-IT3,2071;ENSG00000151067_CACNA1C,301061			0.0815944	0.386424	Diagnosis	Immature
chr12:2273190-2274011		ENSG00000256721_CACNA1C-IT3,3414;ENSG00000151067_CACNA1C,302404			0.359097	0.531992	Diagnosis	Immature
chr12:2282004-2282926		ENSG00000256721_CACNA1C-IT3,12228;ENSG00000151067_CACNA1C,311218			0.718403	0.80122	Diagnosis	Immature
chr12:2283499-2284359		ENSG00000256721_CACNA1C-IT3,13723;ENSG00000151067_CACNA1C,312713			0.308598	0.5049	Diagnosis	Immature
chr12:2284519-2285333		ENSG00000256721_CACNA1C-IT3,14743;ENSG00000151067_CACNA1C,313733			0.143487	0.423034	Diagnosis	Immature
chr12:2295792-2296676		ENSG00000151067_CACNA1C,325006			0.170435	0.435362	Diagnosis	Immature
chr12:2301766-2302693		ENSG00000151067_CACNA1C,330980			0.144234	0.42339	Diagnosis	Immature
chr12:2333164-2333920	ENSG00000285555_AC005293.1,1782	ENSG00000285555_AC005293.1,1782;ENSG00000151067_CACNA1C,362378			0.427682	0.57278	Diagnosis	Immature
chr12:2334040-2334664	ENSG00000285555_AC005293.1,1038	ENSG00000285555_AC005293.1,1038;ENSG00000151067_CACNA1C,363254			0.447869	0.586028	Diagnosis	Immature
chr12:2353897-2354783		ENSG00000151067_CACNA1C,383111			0.586932	0.691491	Diagnosis	Immature
chr12:2372051-2372825		ENSG00000151067_CACNA1C,401265			0.0515695	0.357499	Diagnosis	Immature
chr12:2392767-2393636		ENSG00000151067_CACNA1C,421981			0.21997	0.4594	Diagnosis	Immature
chr12:2396207-2397046		ENSG00000151067_CACNA1C,425421			0.26906	0.483795	Diagnosis	Immature
chr12:2409567-2410456		ENSG00000151067_CACNA1C,438781			0.0650605	0.372315	Diagnosis	Immature
chr12:2432649-2433574		ENSG00000151067_CACNA1C,461863			0.0486051	0.353704	Diagnosis	Immature
chr12:2447454-2448391		ENSG00000285734_AC005414.1,9001;ENSG00000151067_CACNA1C,476668			0.852729	0.902285	Diagnosis	Immature
chr12:2461766-2462687		ENSG00000151067_CACNA1C,490980			0.421097	0.568712	Diagnosis	Immature
chr12:2481723-2482610		ENSG00000151067_CACNA1C,510937			0.245534	0.472081	Diagnosis	Immature
chr12:2489415-2490051		ENSG00000151067_CACNA1C,518629			0.329218	0.515955	Diagnosis	Immature
chr12:2500048-2500821		ENSG00000151067_CACNA1C,529262			0.298189	0.499327	Diagnosis	Immature
chr12:2501405-2502351		ENSG00000151067_CACNA1C,530619			0.179256	0.439687	Diagnosis	Immature
chr12:2507550-2508392		ENSG00000151067_CACNA1C,536764			0.247885	0.473229	Diagnosis	Immature
chr12:2547258-2548062		ENSG00000151067_CACNA1C,576472			0.897768	0.933515	Diagnosis	Immature
chr12:2582750-2583664		ENSG00000151067_CACNA1C,611964			0.850742	0.900844	Diagnosis	Immature
chr12:2605967-2606760	ENSG00000256769_CACNA1C-AS3,680	ENSG00000256769_CACNA1C-AS3,680;ENSG00000151067_CACNA1C,635181			0.0120517	0.267541	Diagnosis	Immature
chr12:2613440-2614351		ENSG00000151067_CACNA1C,642654			0.3616	0.53334	Diagnosis	Immature
chr12:2615499-2616297		ENSG00000151067_CACNA1C,644713			0.898764	0.934126	Diagnosis	Immature
chr12:2640398-2641265		ENSG00000151067_CACNA1C,669612			0.418385	0.56714	Diagnosis	Immature
chr12:2644622-2645457		ENSG00000151067_CACNA1C,673836			0.0347991	0.335878	Diagnosis	Immature
chr12:2690975-2691861	ENSG00000246627_CACNA1C-AS1,0	ENSG00000246627_CACNA1C-AS1,0;ENSG00000151067_CACNA1C,720189			0.530974	0.647028	Diagnosis	Immature
chr12:4271824-4272609	ENSG00000118971_CCND2,-1153	ENSG00000255920_CCND2-AS1,3643			0.1667	0.433909	Diagnosis	Immature
chr12:4273448-4274217	ENSG00000118971_CCND2,0	ENSG00000118971_CCND2,0;ENSG00000255920_CCND2-AS1,2035			0.00603011	0.230409	Diagnosis	Immature
chr12:4276649-4277564	ENSG00000255920_CCND2-AS1,-397	ENSG00000118971_CCND2,2887			0.111926	0.405289	Diagnosis	Immature
chr12:4283505-4284385		ENSG00000118971_CCND2,9743			0.0139578	0.275396	Diagnosis	Immature
chr12:4288972-4289869		ENSG00000118971_CCND2,15210			0.0587559	0.365458	Diagnosis	Immature
chr12:4293568-4294493		ENSG00000118971_CCND2,19806			0.27647	0.487867	Diagnosis	Immature
chr12:5442179-5443009		ENSG00000185652_NTF3,10071			0.688639	0.777272	Diagnosis	Immature
chr12:6335006-6335846		ENSG00000067182_TNFRSF1A,6268			0.312587	0.507012	Diagnosis	Immature
chr12:6336169-6337071		ENSG00000067182_TNFRSF1A,5043			0.0559058	0.361963	Diagnosis	Immature
chr12:6341537-6342396	ENSG00000067182_TNFRSF1A,0	ENSG00000067182_TNFRSF1A,0			0.642702	0.738633	Diagnosis	Immature
chr12:12714113-12715006	ENSG00000111276_CDKN1B,-52				0.0341698	0.334806	Diagnosis	Immature
chr12:12716781-12717705	ENSG00000275560_AC008115.3,-1268;ENSG00000111276_CDKN1B,1723	ENSG00000111276_CDKN1B,1723			0.0318808	0.330488	Diagnosis	Immature
chr12:13452858-13453780		ENSG00000273079_GRIN2B,528177			0.0486296	0.353704	Diagnosis	Immature
chr12:13465309-13466079		ENSG00000273079_GRIN2B,515878			0.869594	0.914312	Diagnosis	Immature
chr12:13471293-13472204		ENSG00000273079_GRIN2B,509753			0.752186	0.827866	Diagnosis	Immature
chr12:13474989-13475872		ENSG00000273079_GRIN2B,506085			0.620349	0.719484	Diagnosis	Immature
chr12:13487218-13488132		ENSG00000273079_GRIN2B,493825			0.164804	0.433	Diagnosis	Immature
chr12:13503985-13504856		ENSG00000273079_GRIN2B,477101			0.215592	0.45713	Diagnosis	Immature
chr12:13530838-13531670		ENSG00000256306_AC007527.1,3984;ENSG00000273079_GRIN2B,450287			0.330821	0.516827	Diagnosis	Immature
chr12:13534415-13535343		ENSG00000256306_AC007527.1,7561;ENSG00000273079_GRIN2B,446614			0.129641	0.415004	Diagnosis	Immature
chr12:13546041-13546929		ENSG00000256306_AC007527.1,19187;ENSG00000273079_GRIN2B,435028			0.251264	0.47464	Diagnosis	Immature
chr12:13621720-13622589		ENSG00000273079_GRIN2B,359368			0.328124	0.515368	Diagnosis	Immature
chr12:13630547-13631369		ENSG00000273079_GRIN2B,350588			0.133827	0.417178	Diagnosis	Immature
chr12:13631535-13632376		ENSG00000273079_GRIN2B,349581			0.173439	0.436418	Diagnosis	Immature
chr12:13660997-13661919		ENSG00000273079_GRIN2B,320038			0.306042	0.503493	Diagnosis	Immature
chr12:13670153-13671002		ENSG00000273079_GRIN2B,310955			0.724859	0.806452	Diagnosis	Immature
chr12:13686022-13686848		ENSG00000273079_GRIN2B,295109			0.255097	0.476818	Diagnosis	Immature
chr12:13691287-13692135		ENSG00000273079_GRIN2B,289822			0.093226	0.39405	Diagnosis	Immature
chr12:13692354-13693109		ENSG00000273079_GRIN2B,288848			0.244662	0.471856	Diagnosis	Immature
chr12:13703889-13704834		ENSG00000273079_GRIN2B,277123			0.265677	0.481944	Diagnosis	Immature
chr12:13739374-13740282		ENSG00000273079_GRIN2B,241675			0.0565645	0.36247	Diagnosis	Immature
chr12:13749201-13750050		ENSG00000273079_GRIN2B,231907			0.436964	0.578818	Diagnosis	Immature
chr12:13794265-13795084		ENSG00000273079_GRIN2B,186873			0.296057	0.498189	Diagnosis	Immature
chr12:13799325-13800170		ENSG00000273079_GRIN2B,181787			0.529743	0.646041	Diagnosis	Immature
chr12:13803435-13804227		ENSG00000273079_GRIN2B,177730			0.572694	0.679853	Diagnosis	Immature
chr12:13816134-13817004		ENSG00000273079_GRIN2B,164953			0.125132	0.412883	Diagnosis	Immature
chr12:13820514-13821375		ENSG00000273079_GRIN2B,160582			0.094178	0.394757	Diagnosis	Immature
chr12:13835434-13836356		ENSG00000273079_GRIN2B,145601			0.438862	0.579964	Diagnosis	Immature
chr12:13851577-13852476		ENSG00000273079_GRIN2B,129481			0.277128	0.488122	Diagnosis	Immature
chr12:13857401-13858271		ENSG00000273079_GRIN2B,123686			0.556985	0.667429	Diagnosis	Immature
chr12:13858847-13859733		ENSG00000273079_GRIN2B,122224			0.358643	0.5318	Diagnosis	Immature
chr12:13863879-13864749		ENSG00000273079_GRIN2B,117208			0.946857	0.965965	Diagnosis	Immature
chr12:13939120-13940051		ENSG00000273079_GRIN2B,41906			0.379664	0.543616	Diagnosis	Immature
chr12:13941418-13942265		ENSG00000273079_GRIN2B,39692			0.806919	0.868913	Diagnosis	Immature
chr12:13947146-13948025		ENSG00000273079_GRIN2B,33932			0.772387	0.843138	Diagnosis	Immature
chr12:13959070-13959970		ENSG00000273079_GRIN2B,21987			0.988791	0.993254	Diagnosis	Immature
chr12:13961841-13962446		ENSG00000273079_GRIN2B,19511			0.211663	0.455178	Diagnosis	Immature
chr12:13962562-13963254		ENSG00000273079_GRIN2B,18703			0.0508339	0.356768	Diagnosis	Immature
chr12:13980351-13981163	ENSG00000273079_GRIN2B,794	ENSG00000273079_GRIN2B,794			0.1355	0.418369	Diagnosis	Immature
chr12:13981569-13982502	ENSG00000273079_GRIN2B,0	ENSG00000273079_GRIN2B,0			0.00925335	0.251165	Diagnosis	Immature
chr12:22083063-22083917		ENSG00000111728_ST8SIA1,353124			0.842948	0.895314	Diagnosis	Immature
chr12:22087876-22088755		ENSG00000111728_ST8SIA1,348286			0.0888823	0.391411	Diagnosis	Immature
chr12:22100676-22101501		ENSG00000111728_ST8SIA1,335540			0.880532	0.921954	Diagnosis	Immature
chr12:22101694-22102614		ENSG00000111728_ST8SIA1,334427			0.6241	0.722573	Diagnosis	Immature
chr12:22115714-22116666		ENSG00000111728_ST8SIA1,320375			0.108538	0.403381	Diagnosis	Immature
chr12:22227909-22228837		ENSG00000111728_ST8SIA1,208204			0.0808108	0.386352	Diagnosis	Immature
chr12:22254847-22255667		ENSG00000111728_ST8SIA1,181374			0.228077	0.462915	Diagnosis	Immature
chr12:22275547-22276452		ENSG00000111728_ST8SIA1,160589			0.086348	0.389588	Diagnosis	Immature
chr12:22282901-22283802		ENSG00000111728_ST8SIA1,153239			0.424261	0.570634	Diagnosis	Immature
chr12:22312009-22312906		ENSG00000111728_ST8SIA1,124135			0.0839477	0.38834	Diagnosis	Immature
chr12:22318175-22319052		ENSG00000111728_ST8SIA1,117989			0.170677	0.435445	Diagnosis	Immature
chr12:22321304-22322155		ENSG00000111728_ST8SIA1,114886			0.35531	0.529982	Diagnosis	Immature
chr12:22335265-22336011		ENSG00000111728_ST8SIA1,101030			0.0154438	0.282858	Diagnosis	Immature
chr12:22339838-22340563		ENSG00000111728_ST8SIA1,96478			0.498424	0.621877	Diagnosis	Immature
chr12:22359188-22360049		ENSG00000111728_ST8SIA1,76992			0.0503137	0.356084	Diagnosis	Immature
chr12:22408604-22409421	ENSG00000250166_AC053513.1,0	ENSG00000250166_AC053513.1,0;ENSG00000111728_ST8SIA1,27620			0.272485	0.485493	Diagnosis	Immature
chr12:32678934-32679777	ENSG00000087470_DNM1L,0	ENSG00000087470_DNM1L,0			0.0214083	0.303222	Diagnosis	Immature
chr12:32702305-32703210		ENSG00000087470_DNM1L,23105			0.188844	0.444012	Diagnosis	Immature
chr12:32732180-32733064		ENSG00000139131_YARS2,22833;ENSG00000087470_DNM1L,52980			0.205905	0.452454	Diagnosis	Immature
chr12:40224366-40225297	ENSG00000225342_AC079630.1,0	ENSG00000225342_AC079630.1,0;ENSG00000188906_LRRK2,27622			0.150112	0.426178	Diagnosis	Immature
chr12:40226421-40227297	ENSG00000225342_AC079630.1,-1506	ENSG00000188906_LRRK2,29677			0.164597	0.432868	Diagnosis	Immature
chr12:40229811-40230455		ENSG00000188906_LRRK2,33067			0.0631627	0.369702	Diagnosis	Immature
chr12:40237976-40238840		ENSG00000188906_LRRK2,41232			0.0559534	0.361963	Diagnosis	Immature
chr12:40325056-40325934		ENSG00000188906_LRRK2,128312			0.287758	0.493843	Diagnosis	Immature
chr12:40336227-40337047		ENSG00000188906_LRRK2,139483			0.713542	0.79744	Diagnosis	Immature
chr12:49186919-49187746	ENSG00000167553_TUBA1C,-990;ENSG00000167552_TUBA1A,1334	ENSG00000167552_TUBA1A,1334;ENSG00000258017_AC011603.2,59137			0.00788832	0.242596	Diagnosis	Immature
chr12:49188710-49189542	ENSG00000167553_TUBA1C,0;ENSG00000167552_TUBA1A,0	ENSG00000167552_TUBA1A,0;ENSG00000167553_TUBA1C,0			0.163415	0.432045	Diagnosis	Immature
chr12:55966347-55967245	ENSG00000123374_CDK2,0;ENSG00000258554_AC025162.1,229	ENSG00000123374_CDK2,0;ENSG00000258554_AC025162.1,229;ENSG00000185664_PMEL,6072			0.0409407	0.343192	Diagnosis	Immature
chr12:57458991-57459795	ENSG00000111087_GLI1,0	ENSG00000111087_GLI1,0;ENSG00000287200_AC022506.2,3023;ENSG00000139269_INHBE,6668			0.0393328	0.342213	Diagnosis	Immature
chr12:57462325-57463146	ENSG00000287200_AC022506.2,0	ENSG00000287200_AC022506.2,0;ENSG00000111087_GLI1,2540			0.365055	0.535105	Diagnosis	Immature
chr12:57752015-57752917		ENSG00000135446_CDK4,3096			0.062222	0.369031	Diagnosis	Immature
chr12:57754713-57755440	ENSG00000139266_MARCH9,0;ENSG00000135446_CDK4,573	ENSG00000139266_MARCH9,0;ENSG00000135446_CDK4,573			0.224347	0.461252	Diagnosis	Immature
chr12:71938485-71939405	ENSG00000139287_TPH2,0	ENSG00000139287_TPH2,0			0.434616	0.577153	Diagnosis	Immature
chr12:71947349-71948235		ENSG00000139287_TPH2,8504			0.71992	0.802428	Diagnosis	Immature
chr12:72016781-72017663		ENSG00000139287_TPH2,77936			0.238275	0.468286	Diagnosis	Immature
chr12:72081554-72082404		ENSG00000139287_TPH2,142709			0.175579	0.437456	Diagnosis	Immature
chr12:72082947-72083727		ENSG00000139287_TPH2,144102			0.437445	0.57911	Diagnosis	Immature
chr12:72110980-72111721		ENSG00000072657_TRHDE,23714;ENSG00000139287_TPH2,172135			0.464157	0.597128	Diagnosis	Immature
chr12:92145574-92146488	ENSG00000133639_BTG1,0;ENSG00000245904_AC025164.1,1	ENSG00000133639_BTG1,0;ENSG00000245904_AC025164.1,1			0.000779706	0.174388	Diagnosis	Immature
chr12:93569431-93569985	ENSG00000120833_SOCS2,0;ENSG00000246985_SOCS2-AS1,1783	ENSG00000120833_SOCS2,0;ENSG00000246985_SOCS2-AS1,1783			0.135046	0.418032	Diagnosis	Immature
chr12:93570522-93571315	ENSG00000246985_SOCS2-AS1,453;ENSG00000120833_SOCS2,708	ENSG00000246985_SOCS2-AS1,453;ENSG00000120833_SOCS2,708			0.00555443	0.224869	Diagnosis	Immature
chr12:93572974-93573865	ENSG00000246985_SOCS2-AS1,-1206	ENSG00000120833_SOCS2,3160			0.252765	0.475537	Diagnosis	Immature
chr12:102405727-102406629		ENSG00000017427_IGF1,75115;ENSG00000283052_LINC02456,101372			0.196512	0.447611	Diagnosis	Immature
chr12:102427345-102428088		ENSG00000017427_IGF1,53656;ENSG00000283052_LINC02456,122990			0.326894	0.514783	Diagnosis	Immature
chr12:102955990-102956858	ENSG00000139352_ASCL1,-816;ENSG00000171759_PAH,1552	ENSG00000171759_PAH,1552			0.0698182	0.377128	Diagnosis	Immature
chr12:102957421-102958031	ENSG00000139352_ASCL1,0;ENSG00000171759_PAH,379	ENSG00000139352_ASCL1,0;ENSG00000171759_PAH,379			0.0935039	0.394247	Diagnosis	Immature
chr12:102958160-102958905	ENSG00000171759_PAH,0;ENSG00000139352_ASCL1,486	ENSG00000171759_PAH,0;ENSG00000139352_ASCL1,486			0.00646232	0.234638	Diagnosis	Immature
chr12:117212415-117213261		ENSG00000089250_NOS1,238909			0.214952	0.45689	Diagnosis	Immature
chr12:117228188-117228990		ENSG00000089250_NOS1,223180			0.233319	0.465995	Diagnosis	Immature
chr12:117236261-117237152		ENSG00000089250_NOS1,215018			0.450444	0.587709	Diagnosis	Immature
chr12:117294082-117294872		ENSG00000089250_NOS1,157298			0.585397	0.690284	Diagnosis	Immature
chr12:117333180-117334122		ENSG00000089250_NOS1,118048			0.0943865	0.394757	Diagnosis	Immature
chr12:117334994-117335897		ENSG00000089250_NOS1,116273			0.00451512	0.215387	Diagnosis	Immature
chr12:117366750-117367622		ENSG00000089250_NOS1,84548			0.945838	0.96528	Diagnosis	Immature
chr12:117429988-117430868		ENSG00000089250_NOS1,21302			0.164692	0.432868	Diagnosis	Immature
chr12:117437661-117438582		ENSG00000089250_NOS1,13588			0.295605	0.497959	Diagnosis	Immature
chr12:117439185-117440061		ENSG00000089250_NOS1,12109			0.745207	0.822451	Diagnosis	Immature
chr12:117441508-117442386		ENSG00000089250_NOS1,9784			0.11004	0.404245	Diagnosis	Immature
chr12:119686452-119687382		ENSG00000122966_CIT,189938			0.122099	0.411032	Diagnosis	Immature
chr12:119699824-119700660	ENSG00000255692_AC002563.1,56	ENSG00000255692_AC002563.1,56;ENSG00000122966_CIT,176660			0.14637	0.424305	Diagnosis	Immature
chr12:119703987-119704919		ENSG00000122966_CIT,172401			0.76738	0.839167	Diagnosis	Immature
chr12:119710962-119711705		ENSG00000122966_CIT,165615			0.165564	0.433562	Diagnosis	Immature
chr12:119721041-119721931		ENSG00000122966_CIT,155389			0.140779	0.421224	Diagnosis	Immature
chr12:119725214-119726115		ENSG00000122966_CIT,151205			0.200655	0.449486	Diagnosis	Immature
chr12:119727866-119728730		ENSG00000122966_CIT,148590			0.0907989	0.392919	Diagnosis	Immature
chr12:119742574-119743422		ENSG00000122966_CIT,133898			0.558518	0.668527	Diagnosis	Immature
chr12:119748318-119749134		ENSG00000122966_CIT,128186			0.0816	0.386424	Diagnosis	Immature
chr12:119749491-119750316		ENSG00000122966_CIT,127004			0.00275702	0.196728	Diagnosis	Immature
chr12:119751789-119752601		ENSG00000122966_CIT,124719			0.191555	0.444945	Diagnosis	Immature
chr12:119786326-119787193		ENSG00000122966_CIT,90127			0.0696533	0.377057	Diagnosis	Immature
chr12:119791086-119791940		ENSG00000122966_CIT,85380			0.16691	0.434019	Diagnosis	Immature
chr12:119796926-119797771		ENSG00000122966_CIT,79549			0.187294	0.443352	Diagnosis	Immature
chr12:119802220-119803047		ENSG00000122966_CIT,74273			0.0677826	0.375143	Diagnosis	Immature
chr12:119804026-119804870		ENSG00000122966_CIT,72450			0.233998	0.466086	Diagnosis	Immature
chr12:119842078-119842886		ENSG00000122966_CIT,34434			0.493466	0.618316	Diagnosis	Immature
chr12:119868832-119869684		ENSG00000122966_CIT,7636			0.906825	0.939398	Diagnosis	Immature
chr12:119876906-119877787	ENSG00000122966_CIT,0	ENSG00000122966_CIT,0			0.316942	0.509229	Diagnosis	Immature
chr13:28323936-28324815		ENSG00000102755_FLT1,170330			0.447523	0.585783	Diagnosis	Immature
chr13:28394335-28395189		ENSG00000102755_FLT1,99956			0.0954031	0.39492	Diagnosis	Immature
chr13:28422661-28423591		ENSG00000102755_FLT1,71554			0.365085	0.535111	Diagnosis	Immature
chr13:28459621-28460540		ENSG00000102755_FLT1,34605			0.25359	0.475917	Diagnosis	Immature
chr13:28464716-28465601		ENSG00000102755_FLT1,29544			0.0925589	0.393742	Diagnosis	Immature
chr13:28493772-28494528	ENSG00000102755_FLT1,617	ENSG00000102755_FLT1,617			0.547112	0.659397	Diagnosis	Immature
chr13:28494740-28495591	ENSG00000102755_FLT1,0	ENSG00000102755_FLT1,0			0.370437	0.538264	Diagnosis	Immature
chr13:30461459-30462321		ENSG00000189403_HMGB1,155276			0.168373	0.434451	Diagnosis	Immature
chr13:30464358-30465209	ENSG00000285840_AL353648.1,-908	ENSG00000189403_HMGB1,152388			0.0301002	0.326499	Diagnosis	Immature
chr13:30465564-30466464	ENSG00000285840_AL353648.1,0	ENSG00000285840_AL353648.1,0;ENSG00000189403_HMGB1,151133			0.00065379	0.171004	Diagnosis	Immature
chr13:30477331-30478188		ENSG00000285840_AL353648.1,11214;ENSG00000189403_HMGB1,139409			0.376473	0.54167	Diagnosis	Immature
chr13:30569607-30570505		ENSG00000189403_HMGB1,47092			0.991915	0.994977	Diagnosis	Immature
chr13:30572635-30573536		ENSG00000189403_HMGB1,44061			0.600915	0.703215	Diagnosis	Immature
chr13:30617249-30618111	ENSG00000189403_HMGB1,0;ENSG00000132952_USPL1,0	ENSG00000189403_HMGB1,0;ENSG00000132952_USPL1,0			0.00748961	0.240176	Diagnosis	Immature
chr13:46831284-46832147		ENSG00000102468_HTR2A,64929			0.30995	0.50563	Diagnosis	Immature
chr13:46865836-46866739		ENSG00000102468_HTR2A,30337			0.279714	0.489438	Diagnosis	Immature
chr13:46873882-46874675		ENSG00000102468_HTR2A,22401			0.532519	0.648278	Diagnosis	Immature
chr13:46893804-46894709		ENSG00000102468_HTR2A,2367			0.255736	0.477174	Diagnosis	Immature
chr13:46896570-46897451	ENSG00000102468_HTR2A,0	ENSG00000102468_HTR2A,0			0.522648	0.640473	Diagnosis	Immature
chr13:94713013-94713788	ENSG00000125285_SOX21,-468	ENSG00000227640_SOX21-AS1,9559			0.116603	0.408104	Diagnosis	Immature
chr13:106491673-106492576	ENSG00000284966_AL138689.2,526	ENSG00000284966_AL138689.2,526;ENSG00000125266_EFNB2,43086			0.0309171	0.328009	Diagnosis	Immature
chr13:106493429-106494291		ENSG00000284966_AL138689.2,2282;ENSG00000125266_EFNB2,41371			0.157357	0.429318	Diagnosis	Immature
chr13:106498223-106499158		ENSG00000284966_AL138689.2,7076;ENSG00000125266_EFNB2,36504			0.0736266	0.380486	Diagnosis	Immature
chr13:106499847-106500648		ENSG00000284966_AL138689.2,8700;ENSG00000125266_EFNB2,35014			0.224662	0.461425	Diagnosis	Immature
chr13:106507534-106508475	ENSG00000274204_AL138689.1,-821	ENSG00000284966_AL138689.2,16387;ENSG00000125266_EFNB2,27187			0.0424898	0.344937	Diagnosis	Immature
chr13:106520124-106521066		ENSG00000125266_EFNB2,14596;ENSG00000284966_AL138689.2,28977			0.114521	0.407122	Diagnosis	Immature
chr13:106523205-106523957		ENSG00000125266_EFNB2,11705			0.152861	0.427488	Diagnosis	Immature
chr13:106532777-106533591		ENSG00000125266_EFNB2,2071			0.0272646	0.320571	Diagnosis	Immature
chr13:106535265-106536171	ENSG00000125266_EFNB2,0	ENSG00000125266_EFNB2,0			0.000948433	0.176326	Diagnosis	Immature
chr13:106536473-106537053	ENSG00000125266_EFNB2,-811				0.771658	0.842584	Diagnosis	Immature
chr13:108269601-108270545		ENSG00000102524_TNFSF13B,18361			0.148949	0.4257	Diagnosis	Immature
chr13:108288390-108289260		ENSG00000102524_TNFSF13B,37150			0.209142	0.453946	Diagnosis	Immature
chr13:108289746-108290537		ENSG00000102524_TNFSF13B,38506			0.785367	0.853091	Diagnosis	Immature
chr13:108304122-108304941		ENSG00000102524_TNFSF13B,52882			0.468986	0.600385	Diagnosis	Immature
chr13:108306629-108307565		ENSG00000102524_TNFSF13B,55389			0.14111	0.421503	Diagnosis	Immature
chr13:112066408-112067310	ENSG00000182968_SOX1,0	ENSG00000182968_SOX1,0;ENSG00000224243_SOX1-OT,9563			0.205157	0.452119	Diagnosis	Immature
chr14:21024729-21025496	ENSG00000258604_AL161668.4,557;ENSG00000179636_TPPP2,620	ENSG00000258604_AL161668.4,557;ENSG00000179636_TPPP2,620;ENSG00000165795_NDRG2,45376			0.0425941	0.345037	Diagnosis	Immature
chr14:21026300-21026660		ENSG00000258604_AL161668.4,2128;ENSG00000179636_TPPP2,2191;ENSG00000165795_NDRG2,44212			0.0167595	0.287929	Diagnosis	Immature
chr14:21036450-21037338	ENSG00000206150_RNASE13,-1643	ENSG00000165795_NDRG2,33534			0.4749	0.604683	Diagnosis	Immature
chr14:21038676-21039507		ENSG00000165795_NDRG2,31365			0.0895109	0.391876	Diagnosis	Immature
chr14:21039850-21040701	ENSG00000165799_RNASE7,-1615	ENSG00000165795_NDRG2,30171			0.0711803	0.378513	Diagnosis	Immature
chr14:21042712-21043554	ENSG00000165799_RNASE7,396	ENSG00000165799_RNASE7,396;ENSG00000165795_NDRG2,27318			0.147224	0.424773	Diagnosis	Immature
chr14:21059902-21060792		ENSG00000165795_NDRG2,10080			0.153654	0.427631	Diagnosis	Immature
chr14:21069815-21070591	ENSG00000165801_ARHGEF40,0;ENSG00000165795_NDRG2,281	ENSG00000165801_ARHGEF40,0;ENSG00000165795_NDRG2,281			0.22104	0.459954	Diagnosis	Immature
chr14:21071107-21072011	ENSG00000165795_NDRG2,-235;ENSG00000165801_ARHGEF40,834	ENSG00000165801_ARHGEF40,834			0.0180834	0.292669	Diagnosis	Immature
chr14:24365395-24366103	ENSG00000100968_NFATC4,0	ENSG00000100968_NFATC4,0			0.765273	0.837596	Diagnosis	Immature
chr14:24366456-24367252	ENSG00000100968_NFATC4,783	ENSG00000100968_NFATC4,783			0.0487062	0.353754	Diagnosis	Immature
chr14:24368596-24369461		ENSG00000100968_NFATC4,2923			0.675985	0.766935	Diagnosis	Immature
chr14:28758759-28759527	ENSG00000176165_FOXG1,-803	ENSG00000257126_FOXG1-AS1,5765			0.394391	0.552292	Diagnosis	Immature
chr14:28759750-28760564	ENSG00000176165_FOXG1,0	ENSG00000176165_FOXG1,0;ENSG00000257126_FOXG1-AS1,4728			0.580942	0.686519	Diagnosis	Immature
chr14:28761405-28762238	ENSG00000176165_FOXG1,1075	ENSG00000176165_FOXG1,1075;ENSG00000257126_FOXG1-AS1,3054			0.618924	0.718363	Diagnosis	Immature
chr14:28766261-28767118	ENSG00000257126_FOXG1-AS1,-969	ENSG00000176165_FOXG1,5931			0.00964828	0.253617	Diagnosis	Immature
chr14:28767763-28768701		ENSG00000176165_FOXG1,7433			0.894839	0.931656	Diagnosis	Immature
chr14:32932736-32933574	ENSG00000151322_NPAS3,-1359				0.0509893	0.356962	Diagnosis	Immature
chr14:32934203-32935060	ENSG00000151322_NPAS3,0	ENSG00000151322_NPAS3,0			0.220616	0.459754	Diagnosis	Immature
chr14:32938201-32939082		ENSG00000151322_NPAS3,3268			0.0556663	0.361963	Diagnosis	Immature
chr14:32939416-32940304		ENSG00000151322_NPAS3,4483			0.0163174	0.286123	Diagnosis	Immature
chr14:32985556-32986312		ENSG00000151322_NPAS3,50623			0.0599216	0.366395	Diagnosis	Immature
chr14:32986622-32987493		ENSG00000151322_NPAS3,51689			0.0485215	0.353701	Diagnosis	Immature
chr14:33026697-33027601		ENSG00000151322_NPAS3,91764			0.346763	0.525456	Diagnosis	Immature
chr14:33070184-33071114		ENSG00000151322_NPAS3,135251			0.394195	0.552207	Diagnosis	Immature
chr14:33118524-33119355		ENSG00000151322_NPAS3,183591			0.957639	0.973287	Diagnosis	Immature
chr14:33164860-33165767		ENSG00000151322_NPAS3,229927			0.0962048	0.395592	Diagnosis	Immature
chr14:33186418-33187315		ENSG00000151322_NPAS3,251485			0.1966	0.447617	Diagnosis	Immature
chr14:33229285-33230183		ENSG00000151322_NPAS3,294352			0.0577116	0.364207	Diagnosis	Immature
chr14:33282224-33283072		ENSG00000151322_NPAS3,347291			0.990194	0.994052	Diagnosis	Immature
chr14:33300304-33301205		ENSG00000151322_NPAS3,365371			0.716105	0.799494	Diagnosis	Immature
chr14:33307511-33308444		ENSG00000151322_NPAS3,372578			0.118946	0.409645	Diagnosis	Immature
chr14:33332287-33333192		ENSG00000151322_NPAS3,397354			0.0791409	0.384958	Diagnosis	Immature
chr14:33357118-33358004		ENSG00000151322_NPAS3,422185			0.191634	0.444945	Diagnosis	Immature
chr14:33364378-33365199		ENSG00000151322_NPAS3,429445			0.240252	0.469475	Diagnosis	Immature
chr14:33456860-33457656		ENSG00000151322_NPAS3,521927			0.410728	0.56216	Diagnosis	Immature
chr14:33465786-33466538		ENSG00000151322_NPAS3,530853			0.519063	0.637741	Diagnosis	Immature
chr14:33475386-33476278		ENSG00000151322_NPAS3,540453			0.44047	0.581043	Diagnosis	Immature
chr14:33477410-33478300		ENSG00000151322_NPAS3,542477			0.219421	0.459034	Diagnosis	Immature
chr14:33490447-33491285		ENSG00000151322_NPAS3,555514			0.0971941	0.396203	Diagnosis	Immature
chr14:33542556-33543466		ENSG00000151322_NPAS3,607623			0.166695	0.433909	Diagnosis	Immature
chr14:33553639-33554499		ENSG00000151322_NPAS3,618706			0.891705	0.92944	Diagnosis	Immature
chr14:33560887-33561722		ENSG00000151322_NPAS3,625954			0.460487	0.594727	Diagnosis	Immature
chr14:33570676-33571372		ENSG00000151322_NPAS3,635743			0.19301	0.44568	Diagnosis	Immature
chr14:33596477-33597380		ENSG00000287153_AL161851.1,3609;ENSG00000151322_NPAS3,661544			0.54563	0.658244	Diagnosis	Immature
chr14:33608466-33609362		ENSG00000151322_NPAS3,673533			0.46988	0.60096	Diagnosis	Immature
chr14:33675902-33676761		ENSG00000151322_NPAS3,740969			0.47504	0.604787	Diagnosis	Immature
chr14:33682428-33683281	ENSG00000287777_AL161851.2,0	ENSG00000287777_AL161851.2,0;ENSG00000151322_NPAS3,747495			0.339177	0.521478	Diagnosis	Immature
chr14:33699180-33700058		ENSG00000151322_NPAS3,764247			0.692782	0.780642	Diagnosis	Immature
chr14:33711584-33712476		ENSG00000151322_NPAS3,776651			0.159246	0.430265	Diagnosis	Immature
chr14:33765044-33765927		ENSG00000151322_NPAS3,830111			0.0854614	0.389056	Diagnosis	Immature
chr14:33792490-33793330		ENSG00000151322_NPAS3,857557			0.444862	0.583953	Diagnosis	Immature
chr14:53953114-53954041	ENSG00000287156_AL138479.2,-630	ENSG00000125378_BMP4,4720			0.276744	0.488006	Diagnosis	Immature
chr14:53954597-53955453	ENSG00000287156_AL138479.2,0	ENSG00000287156_AL138479.2,0;ENSG00000125378_BMP4,3308			0.31748	0.509539	Diagnosis	Immature
chr14:64196648-64197565		ENSG00000140009_ESR2,140547;ENSG00000054654_SYNE2,343665			0.199862	0.449184	Diagnosis	Immature
chr14:64209498-64210410		ENSG00000140009_ESR2,127702;ENSG00000054654_SYNE2,356515			0.611167	0.71177	Diagnosis	Immature
chr14:64220218-64221107		ENSG00000140009_ESR2,117005;ENSG00000054654_SYNE2,367235			0.393134	0.551538	Diagnosis	Immature
chr14:64221436-64222170		ENSG00000140009_ESR2,115942;ENSG00000054654_SYNE2,368453			0.233758	0.466018	Diagnosis	Immature
chr14:64293981-64294455		ENSG00000140009_ESR2,43657			0.950024	0.968147	Diagnosis	Immature
chr14:64294578-64295303		ENSG00000140009_ESR2,42809			0.229432	0.463768	Diagnosis	Immature
chr14:64296349-64297223		ENSG00000140009_ESR2,40889			0.272811	0.485693	Diagnosis	Immature
chr14:64303176-64304078		ENSG00000140009_ESR2,34034			0.346498	0.525344	Diagnosis	Immature
chr14:64338357-64339199	ENSG00000140009_ESR2,-245;ENSG00000214770_AL161756.1,0	ENSG00000214770_AL161756.1,0			0.00473859	0.219012	Diagnosis	Immature
chr14:73136096-73136947	ENSG00000080815_PSEN1,0	ENSG00000080815_PSEN1,0			0.151609	0.426759	Diagnosis	Immature
chr14:73140739-73141657		ENSG00000080815_PSEN1,4321			0.206714	0.452872	Diagnosis	Immature
chr14:73142768-73143625		ENSG00000080815_PSEN1,6350			0.312319	0.506879	Diagnosis	Immature
chr14:73162050-73162808		ENSG00000080815_PSEN1,25632			0.441697	0.581825	Diagnosis	Immature
chr14:73168106-73168975		ENSG00000080815_PSEN1,31688			0.0139855	0.27553	Diagnosis	Immature
chr14:73172880-73173737		ENSG00000080815_PSEN1,36462			0.179254	0.439687	Diagnosis	Immature
chr14:73222845-73223757		ENSG00000080815_PSEN1,86427			0.747214	0.823986	Diagnosis	Immature
chr14:74881419-74882327	ENSG00000119689_DLST,0	ENSG00000119689_DLST,0			0.468639	0.600112	Diagnosis	Immature
chr14:74892608-74893398		ENSG00000119689_DLST,10717			0.714263	0.798069	Diagnosis	Immature
chr14:74893594-74894394		ENSG00000119689_DLST,11703			0.370975	0.538562	Diagnosis	Immature
chr14:74941486-74942376		ENSG00000119630_PGF,13250			0.107988	0.403079	Diagnosis	Immature
chr14:74946122-74946986		ENSG00000119630_PGF,8640			0.895616	0.932067	Diagnosis	Immature
chr14:75276748-75277687	ENSG00000170345_FOS,-1139				0.268328	0.483455	Diagnosis	Immature
chr14:75278250-75279129	ENSG00000170345_FOS,0	ENSG00000170345_FOS,0			0.020466	0.300001	Diagnosis	Immature
chr14:95095742-95096609		ENSG00000100697_DICER1,61401			0.113532	0.406464	Diagnosis	Immature
chr14:95098810-95099679		ENSG00000100697_DICER1,58331			0.420969	0.56863	Diagnosis	Immature
chr14:95100574-95101313		ENSG00000100697_DICER1,56697			0.331076	0.516999	Diagnosis	Immature
chr14:95106808-95107668		ENSG00000100697_DICER1,50342			0.109972	0.404245	Diagnosis	Immature
chr14:95110094-95110857		ENSG00000100697_DICER1,47153			0.499366	0.622548	Diagnosis	Immature
chr14:95113281-95114186		ENSG00000100697_DICER1,43824			0.0425523	0.345016	Diagnosis	Immature
chr14:95119121-95119978		ENSG00000100697_DICER1,38032			0.109236	0.404009	Diagnosis	Immature
chr14:95132982-95133760		ENSG00000100697_DICER1,24250			0.173173	0.436418	Diagnosis	Immature
chr14:95140294-95141224		ENSG00000100697_DICER1,16786			0.620088	0.719304	Diagnosis	Immature
chr14:95157095-95157944	ENSG00000235706_DICER1-AS1,0;ENSG00000100697_DICER1,66	ENSG00000235706_DICER1-AS1,0;ENSG00000100697_DICER1,66			0.00777227	0.241527	Diagnosis	Immature
chr14:96204350-96205238	ENSG00000168398_BDKRB2,0	ENSG00000168398_BDKRB2,0			0.0450762	0.348979	Diagnosis	Immature
chr14:96243541-96244397		ENSG00000168398_BDKRB2,38862			0.0299337	0.326084	Diagnosis	Immature
chr14:99188667-99189095		ENSG00000127152_BCL11B,83102			0.288181	0.494028	Diagnosis	Immature
chr14:99191816-99192566		ENSG00000127152_BCL11B,79631			0.123969	0.412288	Diagnosis	Immature
chr14:99215004-99215809		ENSG00000127152_BCL11B,56388			0.14554	0.424077	Diagnosis	Immature
chr14:99260655-99261535	ENSG00000235785_AL109767.1,-1413	ENSG00000127152_BCL11B,10662			0.0990144	0.397394	Diagnosis	Immature
chr14:99266278-99267172		ENSG00000127152_BCL11B,5025			0.325534	0.514114	Diagnosis	Immature
chr14:99268444-99269140		ENSG00000127152_BCL11B,3057			0.0427386	0.345291	Diagnosis	Immature
chr14:99270447-99271263	ENSG00000127152_BCL11B,934	ENSG00000127152_BCL11B,934			0.0836148	0.38817	Diagnosis	Immature
chr14:99271825-99272706	ENSG00000127152_BCL11B,0	ENSG00000127152_BCL11B,0			0.00350674	0.206832	Diagnosis	Immature
chr14:104795247-104796119	ENSG00000142208_AKT1,0	ENSG00000142208_AKT1,0			0.151099	0.426567	Diagnosis	Immature
chr15:25345719-25346606	ENSG00000261529_AC100774.1,629	ENSG00000261529_AC100774.1,629;ENSG00000114062_UBE3A,92445;ENSG00000224078_SNHG14,367136			0.383344	0.545654	Diagnosis	Immature
chr15:25402090-25402925		ENSG00000114062_UBE3A,36126;ENSG00000224078_SNHG14,423507			0.557125	0.667487	Diagnosis	Immature
chr15:25407988-25408944		ENSG00000114062_UBE3A,30107;ENSG00000224078_SNHG14,429405			0.0879294	0.390891	Diagnosis	Immature
chr15:25416405-25417296		ENSG00000114062_UBE3A,21755;ENSG00000224078_SNHG14,437822			0.246295	0.472395	Diagnosis	Immature
chr15:25438661-25439473	ENSG00000114062_UBE3A,0	ENSG00000114062_UBE3A,0			0.0717758	0.379074	Diagnosis	Immature
chr15:31953187-31953993		ENSG00000175344_CHRNA7,29749			0.142186	0.422295	Diagnosis	Immature
chr15:31974878-31975255		ENSG00000175344_CHRNA7,51440			0.363754	0.534469	Diagnosis	Immature
chr15:31975344-31975795		ENSG00000175344_CHRNA7,51906			0.290631	0.495407	Diagnosis	Immature
chr15:31977512-31978393		ENSG00000175344_CHRNA7,54074			0.208615	0.453667	Diagnosis	Immature
chr15:32029063-32029655		ENSG00000175344_CHRNA7,105625			0.309379	0.505339	Diagnosis	Immature
chr15:32030004-32030926		ENSG00000175344_CHRNA7,106566			0.188968	0.444045	Diagnosis	Immature
chr15:32096580-32097479		ENSG00000175344_CHRNA7,173142			0.296653	0.498563	Diagnosis	Immature
chr15:67065087-67066021	ENSG00000259347_AC087482.1,0;ENSG00000166949_SMAD3,1324	ENSG00000259347_AC087482.1,0;ENSG00000166949_SMAD3,1324			0.00882216	0.248249	Diagnosis	Immature
chr15:67074104-67075036		ENSG00000166949_SMAD3,10341			0.364874	0.535001	Diagnosis	Immature
chr15:67080717-67081533		ENSG00000166949_SMAD3,16954			0.769071	0.84057	Diagnosis	Immature
chr15:67085601-67086491		ENSG00000166949_SMAD3,21838			0.140073	0.420815	Diagnosis	Immature
chr15:67089289-67090191		ENSG00000166949_SMAD3,25526			0.107606	0.402839	Diagnosis	Immature
chr15:67093302-67094149		ENSG00000166949_SMAD3,29539			0.922804	0.950032	Diagnosis	Immature
chr15:67098199-67099080		ENSG00000166949_SMAD3,34436			0.453663	0.589892	Diagnosis	Immature
chr15:67109479-67110280		ENSG00000166949_SMAD3,45716			0.606983	0.70836	Diagnosis	Immature
chr15:67120887-67121751		ENSG00000166949_SMAD3,57124			0.0919588	0.393301	Diagnosis	Immature
chr15:67137977-67138892		ENSG00000166949_SMAD3,74214			0.233714	0.466018	Diagnosis	Immature
chr15:67146695-67147451	ENSG00000259202_AC012568.1,0	ENSG00000259202_AC012568.1,0;ENSG00000166949_SMAD3,82932			0.942264	0.962853	Diagnosis	Immature
chr15:67161374-67161921		ENSG00000166949_SMAD3,97611			0.344854	0.524504	Diagnosis	Immature
chr15:67165380-67166239		ENSG00000166949_SMAD3,101617			0.804545	0.867265	Diagnosis	Immature
chr15:67167842-67168785		ENSG00000166949_SMAD3,104079			0.819423	0.878146	Diagnosis	Immature
chr15:67542323-67543170	ENSG00000270964_AC016355.1,0;ENSG00000137764_MAP2K5,0	ENSG00000270964_AC016355.1,0;ENSG00000137764_MAP2K5,0			0.0201577	0.299099	Diagnosis	Immature
chr15:67548584-67549441		ENSG00000137764_MAP2K5,5881			0.135921	0.418724	Diagnosis	Immature
chr15:67564247-67565172		ENSG00000137764_MAP2K5,21544			0.0900389	0.39221	Diagnosis	Immature
chr15:67760574-67761392		ENSG00000137764_MAP2K5,217871			0.25595	0.477303	Diagnosis	Immature
chr15:78970266-78971012		ENSG00000058335_RASGRF1,119761			0.235975	0.466939	Diagnosis	Immature
chr15:78979353-78980178	ENSG00000177699_AC011944.1,464	ENSG00000177699_AC011944.1,464;ENSG00000058335_RASGRF1,110595			0.130749	0.41556	Diagnosis	Immature
chr15:78988242-78989164		ENSG00000058335_RASGRF1,101609			0.0606159	0.367386	Diagnosis	Immature
chr15:79028140-79029009		ENSG00000058335_RASGRF1,61764			0.0486278	0.353704	Diagnosis	Immature
chr15:79050667-79051509		ENSG00000058335_RASGRF1,39264			0.179581	0.439808	Diagnosis	Immature
chr15:79051920-79052828		ENSG00000058335_RASGRF1,37945			0.272597	0.485556	Diagnosis	Immature
chr15:79064240-79065066		ENSG00000058335_RASGRF1,25707			0.088075	0.390891	Diagnosis	Immature
chr15:79076364-79077258		ENSG00000058335_RASGRF1,13515			0.343412	0.523896	Diagnosis	Immature
chr15:79082860-79083716		ENSG00000058335_RASGRF1,7057			0.0253724	0.314989	Diagnosis	Immature
chr15:79089072-79089937	ENSG00000058335_RASGRF1,836	ENSG00000058335_RASGRF1,836			0.0412114	0.343848	Diagnosis	Immature
chr15:79091279-79092085	ENSG00000058335_RASGRF1,-506				0.0309732	0.328121	Diagnosis	Immature
chr15:92393444-92394311	ENSG00000140557_ST8SIA2,0	ENSG00000140557_ST8SIA2,0			0.996494	0.997811	Diagnosis	Immature
chr15:92400982-92401933		ENSG00000140557_ST8SIA2,7101			0.207006	0.453036	Diagnosis	Immature
chr15:92429281-92430158		ENSG00000140557_ST8SIA2,35400			0.102287	0.399689	Diagnosis	Immature
chr15:92432958-92433851		ENSG00000140557_ST8SIA2,39077			0.176122	0.437665	Diagnosis	Immature
chr15:92459979-92460789		ENSG00000140557_ST8SIA2,66098			0.230572	0.464258	Diagnosis	Immature
chr16:3734536-3735355		ENSG00000005339_CREBBP,145371			0.654182	0.748468	Diagnosis	Immature
chr16:3761548-3762343		ENSG00000005339_CREBBP,118383			0.0828207	0.387532	Diagnosis	Immature
chr16:3772074-3772989		ENSG00000005339_CREBBP,107737			0.694479	0.781974	Diagnosis	Immature
chr16:3774017-3774840		ENSG00000005339_CREBBP,105886			0.990504	0.994267	Diagnosis	Immature
chr16:3792930-3793843		ENSG00000005339_CREBBP,86883			0.952289	0.969672	Diagnosis	Immature
chr16:3824244-3825150		ENSG00000005339_CREBBP,55576			0.775867	0.845908	Diagnosis	Immature
chr16:3850271-3851068		ENSG00000005339_CREBBP,29658			0.128727	0.414567	Diagnosis	Immature
chr16:3856347-3857016		ENSG00000005339_CREBBP,23710			0.419273	0.567707	Diagnosis	Immature
chr16:3857159-3857984		ENSG00000005339_CREBBP,22742			0.30965	0.505459	Diagnosis	Immature
chr16:3870886-3871659		ENSG00000005339_CREBBP,9067			0.468503	0.600041	Diagnosis	Immature
chr16:3872244-3873118		ENSG00000005339_CREBBP,7608			0.609972	0.710833	Diagnosis	Immature
chr16:3879833-3880360	ENSG00000005339_CREBBP,366	ENSG00000005339_CREBBP,366			0.255529	0.477057	Diagnosis	Immature
chr16:3880476-3881180	ENSG00000005339_CREBBP,0	ENSG00000005339_CREBBP,0			0.0317592	0.330391	Diagnosis	Immature
chr16:9761681-9762568		ENSG00000183454_GRIN2A,420186			0.240385	0.469535	Diagnosis	Immature
chr16:9791226-9792134		ENSG00000183454_GRIN2A,390620			0.0524383	0.358777	Diagnosis	Immature
chr16:9820911-9821685		ENSG00000183454_GRIN2A,361069			0.241871	0.470379	Diagnosis	Immature
chr16:9849451-9850373		ENSG00000183454_GRIN2A,332381			0.611463	0.712003	Diagnosis	Immature
chr16:9850707-9851527		ENSG00000183454_GRIN2A,331227			0.59763	0.700366	Diagnosis	Immature
chr16:9854340-9855218		ENSG00000183454_GRIN2A,327536			0.207961	0.453414	Diagnosis	Immature
chr16:9859412-9860256		ENSG00000183454_GRIN2A,322498			0.158866	0.430079	Diagnosis	Immature
chr16:9876365-9877107		ENSG00000183454_GRIN2A,305647			0.58954	0.693736	Diagnosis	Immature
chr16:9885170-9886122		ENSG00000183454_GRIN2A,296632			0.916267	0.945659	Diagnosis	Immature
chr16:9908506-9909303		ENSG00000183454_GRIN2A,273451			0.187504	0.443472	Diagnosis	Immature
chr16:9914074-9914856		ENSG00000183454_GRIN2A,267898			0.0424246	0.344839	Diagnosis	Immature
chr16:9929599-9930481		ENSG00000183454_GRIN2A,252273			0.413407	0.563943	Diagnosis	Immature
chr16:9942847-9943757		ENSG00000183454_GRIN2A,238997			0.0495869	0.355183	Diagnosis	Immature
chr16:9969306-9970165		ENSG00000183454_GRIN2A,212589			0.108078	0.40312	Diagnosis	Immature
chr16:9970636-9971505		ENSG00000183454_GRIN2A,211249			0.0406281	0.343002	Diagnosis	Immature
chr16:9976414-9977236		ENSG00000183454_GRIN2A,205518			0.44431	0.583562	Diagnosis	Immature
chr16:9977369-9977905		ENSG00000183454_GRIN2A,204849			0.112779	0.405955	Diagnosis	Immature
chr16:10003214-10004082		ENSG00000183454_GRIN2A,178672			0.704265	0.789871	Diagnosis	Immature
chr16:10009428-10010346		ENSG00000183454_GRIN2A,172408			0.0880961	0.390891	Diagnosis	Immature
chr16:10013128-10013998		ENSG00000183454_GRIN2A,168756			0.714883	0.798596	Diagnosis	Immature
chr16:10027452-10028241		ENSG00000183454_GRIN2A,154513			0.14183	0.422004	Diagnosis	Immature
chr16:10033435-10034287	ENSG00000261810_AC133565.1,0	ENSG00000261810_AC133565.1,0;ENSG00000183454_GRIN2A,148467			0.255939	0.477296	Diagnosis	Immature
chr16:10039100-10039967		ENSG00000183454_GRIN2A,142787			0.051911	0.35812	Diagnosis	Immature
chr16:10040573-10041315		ENSG00000183454_GRIN2A,141439			0.154931	0.42836	Diagnosis	Immature
chr16:10045158-10046052		ENSG00000183454_GRIN2A,136702			0.0840654	0.388396	Diagnosis	Immature
chr16:10055481-10056338		ENSG00000183454_GRIN2A,126416			0.218985	0.458751	Diagnosis	Immature
chr16:10067307-10068210		ENSG00000183454_GRIN2A,114544			0.0831553	0.387755	Diagnosis	Immature
chr16:10069118-10070019		ENSG00000183454_GRIN2A,112735			0.252523	0.475415	Diagnosis	Immature
chr16:10080172-10081026		ENSG00000183454_GRIN2A,101728			0.0703416	0.377699	Diagnosis	Immature
chr16:10086265-10087151		ENSG00000183454_GRIN2A,95603			0.639322	0.735734	Diagnosis	Immature
chr16:10088127-10089009		ENSG00000183454_GRIN2A,93745			0.258974	0.478773	Diagnosis	Immature
chr16:10093092-10093874		ENSG00000183454_GRIN2A,88880			0.461275	0.595274	Diagnosis	Immature
chr16:10099196-10099977		ENSG00000183454_GRIN2A,82777			0.351158	0.527735	Diagnosis	Immature
chr16:10114057-10114914		ENSG00000183454_GRIN2A,67840			0.0822073	0.386923	Diagnosis	Immature
chr16:10126567-10127469		ENSG00000183454_GRIN2A,55285			0.088162	0.390891	Diagnosis	Immature
chr16:10130336-10131204		ENSG00000183454_GRIN2A,51550			0.121676	0.41075	Diagnosis	Immature
chr16:10138723-10139559		ENSG00000183454_GRIN2A,43195			0.477082	0.606116	Diagnosis	Immature
chr16:10153884-10154695		ENSG00000183454_GRIN2A,28059			0.0104045	0.258631	Diagnosis	Immature
chr16:10160155-10161006		ENSG00000183454_GRIN2A,21748			0.248046	0.473277	Diagnosis	Immature
chr16:10167967-10168837		ENSG00000183454_GRIN2A,13917			0.189083	0.444084	Diagnosis	Immature
chr16:10172768-10173632		ENSG00000183454_GRIN2A,9122			0.770639	0.841707	Diagnosis	Immature
chr16:10178192-10179003		ENSG00000183454_GRIN2A,3751			0.973747	0.983759	Diagnosis	Immature
chr16:10180391-10181086	ENSG00000183454_GRIN2A,1668	ENSG00000183454_GRIN2A,1668			0.466751	0.598886	Diagnosis	Immature
chr16:15642731-15643649	ENSG00000166783_MARF1,0;ENSG00000072864_NDE1,0	ENSG00000166783_MARF1,0;ENSG00000072864_NDE1,0			0.538898	0.65307	Diagnosis	Immature
chr16:15649761-15650639		ENSG00000072864_NDE1,6494			0.0969935	0.39607	Diagnosis	Immature
chr16:15672393-15673271		ENSG00000072864_NDE1,29126			0.016658	0.287888	Diagnosis	Immature
chr16:15681971-15682754	ENSG00000262380_AC026401.2,-536	ENSG00000072864_NDE1,38704			0.366611	0.535974	Diagnosis	Immature
chr16:15704370-15705182		ENSG00000072864_NDE1,61103;ENSG00000133392_MYH11,151846			0.366613	0.535974	Diagnosis	Immature
chr16:30183027-30183906	ENSG00000102879_CORO1A,200;ENSG00000261416_AC012645.3,1051	ENSG00000102879_CORO1A,200;ENSG00000261416_AC012645.3,1051			0.0414091	0.344061	Diagnosis	Immature
chr16:30185518-30186420	ENSG00000261416_AC012645.3,-561	ENSG00000102879_CORO1A,2691			0.0727415	0.379674	Diagnosis	Immature
chr16:30187996-30188753		ENSG00000102879_CORO1A,5169			0.296383	0.498406	Diagnosis	Immature
chr16:31259455-31260379	ENSG00000169896_ITGAM,0	ENSG00000169896_ITGAM,0			0.230048	0.464007	Diagnosis	Immature
chr16:31301729-31302582		ENSG00000169896_ITGAM,41762			0.51939	0.638028	Diagnosis	Immature
chr16:31331730-31332474		ENSG00000169896_ITGAM,71763			0.117137	0.408271	Diagnosis	Immature
chr16:55393681-55394585		ENSG00000087245_MMP2,3981			0.848476	0.899167	Diagnosis	Immature
chr16:55444545-55445422		ENSG00000260135_MMP2-AS1,16875;ENSG00000087245_MMP2,54845			0.367518	0.536514	Diagnosis	Immature
chr16:55464829-55465744		ENSG00000087245_MMP2,75129			0.847351	0.8984	Diagnosis	Immature
chr16:55470296-55471203		ENSG00000087245_MMP2,80596			0.89916	0.934368	Diagnosis	Immature
chr16:55478817-55479650		ENSG00000087245_MMP2,89117			0.273187	0.485895	Diagnosis	Immature
chr16:55480152-55481014		ENSG00000087245_MMP2,90452			0.772678	0.843389	Diagnosis	Immature
chr16:55494832-55495676		ENSG00000087245_MMP2,105132			0.0423808	0.3448	Diagnosis	Immature
chr16:55500309-55501034		ENSG00000087245_MMP2,110609			0.169784	0.434992	Diagnosis	Immature
chr16:55502613-55503516		ENSG00000087245_MMP2,112913			0.00971236	0.253735	Diagnosis	Immature
chr16:66830425-66831331		ENSG00000159593_NAE1,41925			0.0609014	0.367439	Diagnosis	Immature
chr16:66844234-66845021	ENSG00000168748_CA7,0	ENSG00000168748_CA7,0;ENSG00000258122_AC044802.2,8427;ENSG00000159593_NAE1,28235			0.55246	0.663794	Diagnosis	Immature
chr16:66867548-66868465		ENSG00000159593_NAE1,4791			0.514647	0.634286	Diagnosis	Immature
chr16:66872812-66873726	ENSG00000159593_NAE1,0	ENSG00000159593_NAE1,0			0.165255	0.433351	Diagnosis	Immature
chr16:71358249-71359143	ENSG00000172137_CALB2,0	ENSG00000172137_CALB2,0			0.130016	0.415111	Diagnosis	Immature
chr17:1762532-1763381	ENSG00000132386_SERPINF1,503	ENSG00000132386_SERPINF1,503			0.0729088	0.379737	Diagnosis	Immature
chr17:1766564-1767414		ENSG00000132386_SERPINF1,4535			0.329509	0.516053	Diagnosis	Immature
chr17:1771239-1772168		ENSG00000132386_SERPINF1,9210			0.350154	0.52719	Diagnosis	Immature
chr17:2303326-2304221	ENSG00000167720_SRR,0;ENSG00000070366_SMG6,0	ENSG00000070366_SMG6,0;ENSG00000167720_SRR,0			0.0640922	0.371349	Diagnosis	Immature
chr17:2593204-2594041	ENSG00000007168_PAFAH1B1,0	ENSG00000007168_PAFAH1B1,0			0.0540679	0.36055	Diagnosis	Immature
chr17:2613241-2614046		ENSG00000007168_PAFAH1B1,20031			0.807605	0.869365	Diagnosis	Immature
chr17:2630975-2631906		ENSG00000007168_PAFAH1B1,37765			0.311884	0.506687	Diagnosis	Immature
chr17:2675015-2675944		ENSG00000007168_PAFAH1B1,81805			0.950069	0.968177	Diagnosis	Immature
chr17:2682314-2683219	ENSG00000272770_AC005696.2,1869	ENSG00000007168_PAFAH1B1,89104			0.225683	0.461889	Diagnosis	Immature
chr17:2685493-2686322	ENSG00000272770_AC005696.2,-405	ENSG00000007168_PAFAH1B1,92283			0.363011	0.53402	Diagnosis	Immature
chr17:7614617-7615488	ENSG00000129245_FXR2,0;ENSG00000129214_SHBG,671	ENSG00000129245_FXR2,0;ENSG00000129214_SHBG,671			0.0130604	0.270561	Diagnosis	Immature
chr17:7667531-7668432		ENSG00000141510_TP53,19118			0.184477	0.442026	Diagnosis	Immature
chr17:7685834-7686766	ENSG00000141499_WRAP53,0;ENSG00000141510_TP53,784	ENSG00000141499_WRAP53,0;ENSG00000141510_TP53,784			0.00730047	0.239533	Diagnosis	Immature
chr17:7687851-7688715	ENSG00000141510_TP53,-301;ENSG00000141499_WRAP53,1780	ENSG00000141499_WRAP53,1780			0.020082	0.298824	Diagnosis	Immature
chr17:7703286-7704203	ENSG00000108947_EFNB3,-999	ENSG00000141499_WRAP53,17215			0.149208	0.425771	Diagnosis	Immature
chr17:7707240-7708089		ENSG00000108947_EFNB3,2038			0.0259427	0.316657	Diagnosis	Immature
chr17:8435483-8436353		ENSG00000166579_NDEL1,22352			0.000267482	0.171004	Diagnosis	Immature
chr17:8470308-8471132		ENSG00000166579_NDEL1,57177			0.693785	0.781431	Diagnosis	Immature
chr17:8479179-8480052		ENSG00000166579_NDEL1,66048;ENSG00000133026_MYH10,150709			0.376318	0.541545	Diagnosis	Immature
chr17:8482224-8483118		ENSG00000166579_NDEL1,69093;ENSG00000133026_MYH10,147643			0.0736717	0.380531	Diagnosis	Immature
chr17:19377841-19378687	ENSG00000108641_B9D1,0;ENSG00000166484_MAPK7,120	ENSG00000108641_B9D1,0;ENSG00000166484_MAPK7,120			0.00634332	0.23336	Diagnosis	Immature
chr17:27756446-27757367		ENSG00000007171_NOS2,43162			0.152132	0.427114	Diagnosis	Immature
chr17:27762280-27763222		ENSG00000007171_NOS2,37307			0.293607	0.496904	Diagnosis	Immature
chr17:27764422-27765213		ENSG00000007171_NOS2,35316			0.0849673	0.388698	Diagnosis	Immature
chr17:27778093-27778941		ENSG00000007171_NOS2,21588			0.930177	0.954763	Diagnosis	Immature
chr17:27793342-27794232		ENSG00000007171_NOS2,6297			0.672904	0.764315	Diagnosis	Immature
chr17:31094492-31095338	ENSG00000196712_NF1,0;ENSG00000264107_AC138207.2,112	ENSG00000196712_NF1,0;ENSG00000264107_AC138207.2,112			0.023316	0.309161	Diagnosis	Immature
chr17:31235230-31236088		ENSG00000196712_NF1,140303			0.726163	0.807433	Diagnosis	Immature
chr17:31249540-31250432		ENSG00000196712_NF1,154613			0.141704	0.421834	Diagnosis	Immature
chr17:31295860-31296622	ENSG00000126861_OMG,917	ENSG00000126861_OMG,917;ENSG00000196712_NF1,200933			0.363387	0.534254	Diagnosis	Immature
chr17:31296891-31297757	ENSG00000126861_OMG,0	ENSG00000126861_OMG,0;ENSG00000196712_NF1,201964			0.0253519	0.314978	Diagnosis	Immature
chr17:31318092-31318928		ENSG00000126860_EVI2A,2956;ENSG00000196712_NF1,223165			0.474156	0.604172	Diagnosis	Immature
chr17:31321425-31322251	ENSG00000126860_EVI2A,0	ENSG00000126860_EVI2A,0;ENSG00000196712_NF1,226498			0.559083	0.668992	Diagnosis	Immature
chr17:31339948-31340805		ENSG00000196712_NF1,245021			0.124453	0.412565	Diagnosis	Immature
chr17:31372856-31373757		ENSG00000196712_NF1,277929			0.626404	0.724464	Diagnosis	Immature
chr17:32486254-32487069	ENSG00000176749_CDK5R1,0	ENSG00000176749_CDK5R1,0			0.00937519	0.25144	Diagnosis	Immature
chr17:39611176-39612031	ENSG00000171532_NEUROD2,-1399				0.214182	0.456326	Diagnosis	Immature
chr17:40013411-40014290	ENSG00000108342_CSF3,-1071;ENSG00000265799_AC090844.3,415	ENSG00000265799_AC090844.3,415			0.0428163	0.345507	Diagnosis	Immature
chr17:40056316-40057141	ENSG00000126351_THRA,-1149	ENSG00000008838_MED24,4074			0.645459	0.740977	Diagnosis	Immature
chr17:40057902-40058772	ENSG00000126351_THRA,0	ENSG00000126351_THRA,0;ENSG00000008838_MED24,2443			0.105043	0.401201	Diagnosis	Immature
chr17:40062534-40063354	ENSG00000008838_MED24,-1319	ENSG00000126351_THRA,4244			0.374875	0.540673	Diagnosis	Immature
chr17:40068658-40069554		ENSG00000126351_THRA,10368			0.00538055	0.223983	Diagnosis	Immature
chr17:40071927-40072825		ENSG00000126351_THRA,13637			0.00486938	0.220175	Diagnosis	Immature
chr17:40074996-40075859		ENSG00000126351_THRA,16706			0.168489	0.43449	Diagnosis	Immature
chr17:40086257-40087128		ENSG00000126351_THRA,27967			0.166944	0.434023	Diagnosis	Immature
chr17:40098839-40099718	ENSG00000126368_NR1D1,871	ENSG00000126368_NR1D1,871			0.298919	0.499648	Diagnosis	Immature
chr17:40100311-40101166	ENSG00000126368_NR1D1,0	ENSG00000126368_NR1D1,0			0.00247728	0.193871	Diagnosis	Immature
chr17:40121486-40122376	ENSG00000188895_MSL1,0	ENSG00000188895_MSL1,0			0.095644	0.395142	Diagnosis	Immature
chr17:40124116-40124987		ENSG00000188895_MSL1,2145			0.167795	0.434265	Diagnosis	Immature
chr17:40308847-40309722	ENSG00000131759_RARA,0	ENSG00000131759_RARA,0			0.4967	0.620578	Diagnosis	Immature
chr17:40311863-40312701		ENSG00000131759_RARA,2683			0.184055	0.441921	Diagnosis	Immature
chr17:40317804-40318658	ENSG00000287644_AC080112.4,18	ENSG00000287644_AC080112.4,18;ENSG00000131759_RARA,8624			0.125937	0.413127	Diagnosis	Immature
chr17:40331823-40332746		ENSG00000131759_RARA,22643			0.055052	0.361522	Diagnosis	Immature
chr17:40341138-40341653	ENSG00000265666_RARA-AS1,1483	ENSG00000265666_RARA-AS1,1483;ENSG00000131759_RARA,31958			0.101017	0.398626	Diagnosis	Immature
chr17:40341766-40342391	ENSG00000265666_RARA-AS1,745	ENSG00000265666_RARA-AS1,745;ENSG00000131759_RARA,32586			0.0456977	0.349818	Diagnosis	Immature
chr17:40345023-40345853	ENSG00000265666_RARA-AS1,-1887	ENSG00000131759_RARA,35843			0.30824	0.504716	Diagnosis	Immature
chr17:40348356-40349244		ENSG00000131759_RARA,39176			0.0299425	0.326097	Diagnosis	Immature
chr17:40354732-40355617		ENSG00000131759_RARA,45552			0.0311516	0.328729	Diagnosis	Immature
chr17:41717178-41717861		ENSG00000173805_HAP1,16783			0.880405	0.921884	Diagnosis	Immature
chr17:41717992-41718749		ENSG00000173805_HAP1,15895			0.740523	0.818843	Diagnosis	Immature
chr17:41734225-41735124	ENSG00000173805_HAP1,0	ENSG00000173805_HAP1,0			0.304495	0.502578	Diagnosis	Immature
chr17:42315304-42316230		ENSG00000168610_STAT3,72338			0.538066	0.652541	Diagnosis	Immature
chr17:42322556-42323433		ENSG00000168610_STAT3,65135			0.121963	0.410937	Diagnosis	Immature
chr17:42329074-42329992		ENSG00000168610_STAT3,58576			0.468426	0.599989	Diagnosis	Immature
chr17:42378828-42379746		ENSG00000168610_STAT3,8822			0.461214	0.595237	Diagnosis	Immature
chr17:42388155-42389085	ENSG00000168610_STAT3,0	ENSG00000168610_STAT3,0			0.0131754	0.270658	Diagnosis	Immature
chr17:44344815-44345647	ENSG00000030582_GRN,0	ENSG00000030582_GRN,0			0.0148569	0.279943	Diagnosis	Immature
chr17:44347971-44348819		ENSG00000030582_GRN,2725			0.156046	0.428758	Diagnosis	Immature
chr17:44350480-44351384		ENSG00000030582_GRN,5234			0.0456583	0.349651	Diagnosis	Immature
chr17:44911207-44912064		ENSG00000131095_GFAP,4873			0.0579054	0.364572	Diagnosis	Immature
chr17:44915032-44915833	ENSG00000131095_GFAP,1104	ENSG00000131095_GFAP,1104			0.955061	0.971653	Diagnosis	Immature
chr17:44916515-44917438	ENSG00000131095_GFAP,0	ENSG00000131095_GFAP,0			0.217486	0.458103	Diagnosis	Immature
chr17:45783045-45783802	ENSG00000120088_CRHR1,-478				0.0202461	0.299313	Diagnosis	Immature
chr17:45784840-45785645	ENSG00000120088_CRHR1,560	ENSG00000120088_CRHR1,560			0.589703	0.693813	Diagnosis	Immature
chr17:45786791-45787704		ENSG00000120088_CRHR1,2511			0.0826225	0.387385	Diagnosis	Immature
chr17:45796020-45796801		ENSG00000120088_CRHR1,11740			0.0847184	0.388616	Diagnosis	Immature
chr17:45801115-45802009		ENSG00000120088_CRHR1,16835;ENSG00000264589_MAPT-AS1,93671			0.282687	0.491078	Diagnosis	Immature
chr17:45813156-45814058		ENSG00000120088_CRHR1,28876;ENSG00000264589_MAPT-AS1,81622			0.0884938	0.391152	Diagnosis	Immature
chr17:45814605-45815496		ENSG00000120088_CRHR1,30325;ENSG00000264589_MAPT-AS1,80184			0.21526	0.457038	Diagnosis	Immature
chr17:45825554-45826416		ENSG00000120088_CRHR1,41274;ENSG00000264589_MAPT-AS1,69264			0.0565611	0.36247	Diagnosis	Immature
chr17:45831888-45832769		ENSG00000120088_CRHR1,47608;ENSG00000264589_MAPT-AS1,62911			0.0983735	0.396966	Diagnosis	Immature
chr17:45893959-45894881	ENSG00000279685_MAPT-IT1,-902;ENSG00000186868_MAPT,0;ENSG00000264589_MAPT-AS1,799	ENSG00000186868_MAPT,0;ENSG00000264589_MAPT-AS1,799			0.0157235	0.283768	Diagnosis	Immature
chr17:45896889-45897705	ENSG00000264589_MAPT-AS1,-1209;ENSG00000279685_MAPT-IT1,1106	ENSG00000279685_MAPT-IT1,1106;ENSG00000186868_MAPT,2507			0.0297484	0.325729	Diagnosis	Immature
chr17:45940472-45941261		ENSG00000186868_MAPT,46090			0.101248	0.398705	Diagnosis	Immature
chr17:45942124-45942951		ENSG00000186868_MAPT,47742			0.0141704	0.276348	Diagnosis	Immature
chr17:45946617-45947551		ENSG00000186868_MAPT,52235			0.0733266	0.38015	Diagnosis	Immature
chr17:45948815-45949714		ENSG00000186868_MAPT,54433			0.490036	0.615825	Diagnosis	Immature
chr17:45954879-45955784		ENSG00000186868_MAPT,60497			0.539645	0.653679	Diagnosis	Immature
chr17:45965516-45966439		ENSG00000186868_MAPT,71134			0.207131	0.453117	Diagnosis	Immature
chr17:45976553-45977454		ENSG00000186868_MAPT,82171			0.622531	0.721273	Diagnosis	Immature
chr17:46000236-46001065	ENSG00000256762_STH,986	ENSG00000186868_MAPT,105854			0.18587	0.442684	Diagnosis	Immature
chr17:46002173-46002985		ENSG00000186868_MAPT,107791			0.0610525	0.367467	Diagnosis	Immature
chr17:46003793-46004637		ENSG00000186868_MAPT,109411			0.0692294	0.376552	Diagnosis	Immature
chr17:46019853-46020761		ENSG00000186868_MAPT,125471			0.114514	0.407122	Diagnosis	Immature
chr17:46023482-46024273		ENSG00000186868_MAPT,129100			0.337065	0.520165	Diagnosis	Immature
chr17:49494804-49495658	ENSG00000064300_NGFR,0	ENSG00000064300_NGFR,0			0.0381549	0.340835	Diagnosis	Immature
chr17:49496207-49497031	ENSG00000064300_NGFR,914	ENSG00000064300_NGFR,914			0.553057	0.664249	Diagnosis	Immature
chr17:49497536-49498262		ENSG00000064300_NGFR,2243			0.635221	0.732129	Diagnosis	Immature
chr17:56592364-56593092	ENSG00000183691_NOG,-607				0.688041	0.776796	Diagnosis	Immature
chr17:56593397-56594268	ENSG00000183691_NOG,0	ENSG00000183691_NOG,0			0.0930244	0.394033	Diagnosis	Immature
chr17:63911371-63912268		ENSG00000204414_CSHL1,6570			0.61546	0.715306	Diagnosis	Immature
chr17:63918968-63919845	ENSG00000204414_CSHL1,-130;ENSG00000259384_GH1,-129				0.115126	0.407504	Diagnosis	Immature
chr17:78213768-78214687	ENSG00000089685_BIRC5,0	ENSG00000089685_BIRC5,0			0.511108	0.631701	Diagnosis	Immature
chr17:78224347-78225119		ENSG00000089685_BIRC5,10161			0.499145	0.622413	Diagnosis	Immature
chr18:26861808-26862487		ENSG00000171885_AQP4,3284;ENSG00000260372_AQP4-AS1,206071			0.318607	0.510128	Diagnosis	Immature
chr18:26862970-26863812	ENSG00000171885_AQP4,1959	ENSG00000171885_AQP4,1959;ENSG00000260372_AQP4-AS1,207233			0.0490369	0.354251	Diagnosis	Immature
chr18:26865191-26866013	ENSG00000171885_AQP4,0	ENSG00000171885_AQP4,0;ENSG00000260372_AQP4-AS1,209454			0.110179	0.404245	Diagnosis	Immature
chr18:26867267-26868119	ENSG00000171885_AQP4,-1496	ENSG00000260372_AQP4-AS1,211530			0.088384	0.390962	Diagnosis	Immature
chr18:47912222-47913093		ENSG00000175387_SMAD2,18053			0.68631	0.775382	Diagnosis	Immature
chr18:47930636-47931420	ENSG00000175387_SMAD2,0	ENSG00000175387_SMAD2,0			0.0272133	0.320409	Diagnosis	Immature
chr18:48920400-48921238		ENSG00000101665_SMAD7,30814			0.200415	0.449369	Diagnosis	Immature
chr18:48928576-48929468		ENSG00000101665_SMAD7,22584			0.282707	0.491102	Diagnosis	Immature
chr18:48933480-48934411		ENSG00000101665_SMAD7,17641			0.84661	0.897941	Diagnosis	Immature
chr18:48935099-48935856		ENSG00000101665_SMAD7,16196			0.256893	0.477805	Diagnosis	Immature
chr18:48939095-48939905		ENSG00000101665_SMAD7,12147			0.633375	0.730449	Diagnosis	Immature
chr18:48948347-48949256		ENSG00000101665_SMAD7,2796			0.0474679	0.352818	Diagnosis	Immature
chr18:48949839-48950715	ENSG00000101665_SMAD7,1337	ENSG00000101665_SMAD7,1337			0.106268	0.40183	Diagnosis	Immature
chr18:48951455-48952323	ENSG00000101665_SMAD7,0	ENSG00000101665_SMAD7,0			0.0429472	0.345695	Diagnosis	Immature
chr18:48952475-48953206	ENSG00000101665_SMAD7,-423				0.00967441	0.25371	Diagnosis	Immature
chr18:49559025-49559952	ENSG00000101670_LIPG,-747				0.571964	0.679255	Diagnosis	Immature
chr18:49561484-49562108	ENSG00000101670_LIPG,785	ENSG00000101670_LIPG,785			0.249966	0.473908	Diagnosis	Immature
chr18:49565415-49566296		ENSG00000101670_LIPG,4716			0.108132	0.40312	Diagnosis	Immature
chr18:49572651-49573544		ENSG00000101670_LIPG,11952			0.262063	0.480413	Diagnosis	Immature
chr18:49584114-49584997		ENSG00000101670_LIPG,23415			0.530711	0.646786	Diagnosis	Immature
chr18:50266060-50266957	ENSG00000172361_CFAP53,0	ENSG00000172361_CFAP53,0;ENSG00000141644_MBD1,14817			0.137491	0.419022	Diagnosis	Immature
chr18:50268066-50268963	ENSG00000172361_CFAP53,-1571	ENSG00000141644_MBD1,12811			0.139496	0.420294	Diagnosis	Immature
chr18:50281211-50282132	ENSG00000141644_MBD1,0	ENSG00000141644_MBD1,0			0.0135904	0.273077	Diagnosis	Immature
chr18:52339660-52340537	ENSG00000266335_AC016383.1,-635;ENSG00000187323_DCC,0	ENSG00000187323_DCC,0			0.589702	0.693813	Diagnosis	Immature
chr18:52341735-52342598	ENSG00000187323_DCC,1538	ENSG00000187323_DCC,1538			0.253891	0.476137	Diagnosis	Immature
chr18:52349019-52349872		ENSG00000187323_DCC,8822			0.550144	0.661806	Diagnosis	Immature
chr18:52353342-52354235		ENSG00000187323_DCC,13145			0.495104	0.619398	Diagnosis	Immature
chr18:52391710-52392620		ENSG00000187323_DCC,51513			0.177466	0.438363	Diagnosis	Immature
chr18:52394857-52395765		ENSG00000187323_DCC,54660			0.035218	0.336309	Diagnosis	Immature
chr18:52408789-52409554		ENSG00000187323_DCC,68592			0.504916	0.626834	Diagnosis	Immature
chr18:52422893-52423822		ENSG00000187323_DCC,82696			0.201219	0.450047	Diagnosis	Immature
chr18:52425782-52426621		ENSG00000187323_DCC,85585			0.0608051	0.367386	Diagnosis	Immature
chr18:52570843-52571739		ENSG00000187323_DCC,230646			0.161663	0.431051	Diagnosis	Immature
chr18:52571990-52572880		ENSG00000187323_DCC,231793			0.642905	0.738778	Diagnosis	Immature
chr18:52577603-52578455		ENSG00000187323_DCC,237406			0.21634	0.457574	Diagnosis	Immature
chr18:52583848-52584638		ENSG00000187323_DCC,243651			0.199135	0.448952	Diagnosis	Immature
chr18:52656922-52657778		ENSG00000187323_DCC,316725			0.155855	0.42875	Diagnosis	Immature
chr18:52670832-52671608		ENSG00000187323_DCC,330635			0.325623	0.514149	Diagnosis	Immature
chr18:52716725-52717617		ENSG00000187323_DCC,376528			0.163231	0.432025	Diagnosis	Immature
chr18:52813445-52814291		ENSG00000187323_DCC,473248			0.691306	0.779437	Diagnosis	Immature
chr18:52903559-52904423		ENSG00000187323_DCC,563362			0.881747	0.922757	Diagnosis	Immature
chr18:52907319-52908227		ENSG00000187323_DCC,567122			0.168	0.434298	Diagnosis	Immature
chr18:52953138-52954066		ENSG00000187323_DCC,612941			0.0340674	0.334431	Diagnosis	Immature
chr18:53093412-53094309		ENSG00000187323_DCC,753215			0.229269	0.463682	Diagnosis	Immature
chr18:53219603-53220509		ENSG00000187323_DCC,879406			0.0905492	0.392704	Diagnosis	Immature
chr18:53379919-53380726		ENSG00000187323_DCC,1039722			0.194501	0.446443	Diagnosis	Immature
chr18:53411289-53412189		ENSG00000187323_DCC,1071092			0.279204	0.489214	Diagnosis	Immature
chr18:53426661-53427427		ENSG00000187323_DCC,1086464			0.405825	0.559318	Diagnosis	Immature
chr18:53441713-53442586		ENSG00000187323_DCC,1101516			0.449241	0.586959	Diagnosis	Immature
chr18:53458665-53459545		ENSG00000187323_DCC,1118468			0.178839	0.439433	Diagnosis	Immature
chr18:53526088-53527005		ENSG00000260433_LINC01917,54102;ENSG00000187323_DCC,1185891			0.335784	0.519451	Diagnosis	Immature
chr18:53534473-53535379		ENSG00000260433_LINC01917,45728;ENSG00000187323_DCC,1194276			0.116975	0.408185	Diagnosis	Immature
chr18:63131164-63131825		ENSG00000171791_BCL2,188303			0.229429	0.463768	Diagnosis	Immature
chr18:63155391-63156152		ENSG00000171791_BCL2,163976			0.150915	0.42643	Diagnosis	Immature
chr18:63161540-63162388		ENSG00000171791_BCL2,157740			0.0256929	0.315997	Diagnosis	Immature
chr18:63175599-63176431		ENSG00000171791_BCL2,143697			0.212525	0.455598	Diagnosis	Immature
chr18:63177706-63178556		ENSG00000171791_BCL2,141572			0.210601	0.454626	Diagnosis	Immature
chr18:63180103-63181001		ENSG00000171791_BCL2,139127			0.0550648	0.361522	Diagnosis	Immature
chr18:63197127-63197886		ENSG00000171791_BCL2,122242			0.471349	0.60209	Diagnosis	Immature
chr18:63202574-63203440		ENSG00000171791_BCL2,116688			0.486435	0.613171	Diagnosis	Immature
chr18:63216456-63217317		ENSG00000171791_BCL2,102811			0.0880337	0.390891	Diagnosis	Immature
chr18:63236277-63237084		ENSG00000171791_BCL2,83044			0.323328	0.512845	Diagnosis	Immature
chr18:63237743-63238599		ENSG00000171791_BCL2,81529			0.134887	0.418009	Diagnosis	Immature
chr18:63249479-63250375		ENSG00000171791_BCL2,69753			0.463037	0.596369	Diagnosis	Immature
chr18:63252756-63253572		ENSG00000171791_BCL2,66556			0.779664	0.848764	Diagnosis	Immature
chr18:63258796-63259723		ENSG00000171791_BCL2,60405			0.156811	0.429007	Diagnosis	Immature
chr18:63262269-63263097		ENSG00000171791_BCL2,57031			0.0397332	0.342503	Diagnosis	Immature
chr18:63271605-63272478		ENSG00000171791_BCL2,47650			0.168983	0.434818	Diagnosis	Immature
chr18:63284795-63285593		ENSG00000171791_BCL2,34535			0.0898577	0.392164	Diagnosis	Immature
chr18:63290392-63291289		ENSG00000171791_BCL2,28839			0.835512	0.889866	Diagnosis	Immature
chr18:63293708-63294620		ENSG00000171791_BCL2,25508			0.360137	0.53261	Diagnosis	Immature
chr18:63297468-63298400		ENSG00000171791_BCL2,21728			0.251079	0.474555	Diagnosis	Immature
chr18:63307393-63308228		ENSG00000171791_BCL2,11900			0.174733	0.437017	Diagnosis	Immature
chr18:63314966-63315864		ENSG00000171791_BCL2,4264			0.167874	0.434265	Diagnosis	Immature
chr18:63317842-63318682	ENSG00000171791_BCL2,1446	ENSG00000171791_BCL2,1446			0.124651	0.412732	Diagnosis	Immature
chr18:63319754-63320670	ENSG00000171791_BCL2,0	ENSG00000171791_BCL2,0			0.050401	0.356146	Diagnosis	Immature
chr19:2427293-2428212	ENSG00000099800_TIMM13,0	ENSG00000099800_TIMM13,0;ENSG00000176619_LMNB2,28747			0.109653	0.404234	Diagnosis	Immature
chr19:2456544-2457429	ENSG00000176619_LMNB2,0	ENSG00000176619_LMNB2,0			0.107966	0.403077	Diagnosis	Immature
chr19:2474320-2475193	ENSG00000099860_GADD45B,-929				0.144477	0.423498	Diagnosis	Immature
chr19:2475673-2476522	ENSG00000099860_GADD45B,0	ENSG00000099860_GADD45B,0			0.0181407	0.292669	Diagnosis	Immature
chr19:10137740-10138664		ENSG00000130816_DNMT1,92622			0.223545	0.461041	Diagnosis	Immature
chr19:10139105-10139864		ENSG00000130816_DNMT1,91422			0.36531	0.53525	Diagnosis	Immature
chr19:10194479-10195347		ENSG00000130816_DNMT1,35939			0.00188053	0.184273	Diagnosis	Immature
chr19:10209057-10209918		ENSG00000130816_DNMT1,21368			0.0701332	0.377589	Diagnosis	Immature
chr19:10226995-10227858		ENSG00000130816_DNMT1,3428;ENSG00000267534_S1PR2,3473			0.00464488	0.217535	Diagnosis	Immature
chr19:10230038-10230608	ENSG00000130816_DNMT1,678;ENSG00000267534_S1PR2,723	ENSG00000130816_DNMT1,678;ENSG00000267534_S1PR2,723			0.455518	0.591272	Diagnosis	Immature
chr19:10230829-10231650	ENSG00000130816_DNMT1,0;ENSG00000267534_S1PR2,0	ENSG00000130816_DNMT1,0;ENSG00000267534_S1PR2,0			0.0371718	0.339345	Diagnosis	Immature
chr19:11380769-11381693		ENSG00000187266_EPOR,2649			0.0726757	0.379674	Diagnosis	Immature
chr19:11383860-11384687	ENSG00000187266_EPOR,0	ENSG00000187266_EPOR,0;ENSG00000205517_RGL3,34655			0.187209	0.443308	Diagnosis	Immature
chr19:15177242-15178165		ENSG00000074181_NOTCH3,22830			0.0882054	0.390891	Diagnosis	Immature
chr19:15195223-15196006		ENSG00000074181_NOTCH3,4989			0.465629	0.598178	Diagnosis	Immature
chr19:35352488-35353392	ENSG00000126266_FFAR1,936	ENSG00000126266_FFAR1,936			0.0765753	0.382691	Diagnosis	Immature
chr19:41308233-41309056	ENSG00000142039_CCDC97,-1116;ENSG00000286177_AC011462.5,1356	ENSG00000286177_AC011462.5,1356;ENSG00000105329_TGFB1,44866			0.0493327	0.354801	Diagnosis	Immature
chr19:41309742-41310685	ENSG00000142039_CCDC97,0;ENSG00000286177_AC011462.5,0	ENSG00000286177_AC011462.5,0;ENSG00000142039_CCDC97,0;ENSG00000105329_TGFB1,43237			0.041845	0.344411	Diagnosis	Immature
chr19:41324960-41325619		ENSG00000105329_TGFB1,28303			0.106758	0.402146	Diagnosis	Immature
chr19:41325770-41326606		ENSG00000105329_TGFB1,27316			0.0439327	0.347324	Diagnosis	Immature
chr19:41328509-41329395		ENSG00000105329_TGFB1,24527			0.0653636	0.372623	Diagnosis	Immature
chr19:41351117-41351989	ENSG00000142046_TMEM91,206;ENSG00000105329_TGFB1,1933	ENSG00000142046_TMEM91,206;ENSG00000105329_TGFB1,1933			0.0946587	0.394757	Diagnosis	Immature
chr19:41353513-41354447	ENSG00000105329_TGFB1,0	ENSG00000105329_TGFB1,0;ENSG00000142046_TMEM91,2602;ENSG00000123810_B9D2,9718			0.38195	0.544879	Diagnosis	Immature
chr19:44903422-44904300	ENSG00000130203_APOE,-1491	ENSG00000130204_TOMM40,12853			0.00931036	0.25144	Diagnosis	Immature
chr19:44905316-44906174	ENSG00000130203_APOE,0	ENSG00000130203_APOE,0			0.0320848	0.330901	Diagnosis	Immature
chr19:45467306-45468217	ENSG00000125740_FOSB,0	ENSG00000125740_FOSB,0;ENSG00000012061_ERCC1,10611			0.00092996	0.176098	Diagnosis	Immature
chr19:45469040-45469831	ENSG00000125740_FOSB,1045	ENSG00000125740_FOSB,1045;ENSG00000012061_ERCC1,8997			0.00320256	0.201981	Diagnosis	Immature
chr19:47225807-47226705		ENSG00000105327_BBC3,6061			0.0480993	0.353428	Diagnosis	Immature
chr19:47230868-47231742	ENSG00000105327_BBC3,1024	ENSG00000105327_BBC3,1024			0.429966	0.574313	Diagnosis	Immature
chr19:48954402-48955330	ENSG00000087088_BAX,0	ENSG00000087088_BAX,0			0.00290528	0.197595	Diagnosis	Immature
chr19:49017589-49018484	ENSG00000104826_LHB,-499	ENSG00000268655_AC008687.4,2039			0.69185	0.779884	Diagnosis	Immature
chr19:49055845-49056739		ENSG00000196337_CGB7,2121			0.404366	0.558602	Diagnosis	Immature
chr2:1459324-1460261		ENSG00000115705_TPO,85258;ENSG00000231482_AC105450.1,120486			0.122526	0.411429	Diagnosis	Immature
chr2:5691793-5692647	ENSG00000230090_AC108025.1,-675;ENSG00000224128_LINC01248,-305;ENSG00000176887_SOX11,0	ENSG00000176887_SOX11,0			0.349508	0.526825	Diagnosis	Immature
chr2:5696550-5697308	ENSG00000242540_AC010729.2,330	ENSG00000242540_AC010729.2,330;ENSG00000176887_SOX11,4166			0.713152	0.797091	Diagnosis	Immature
chr2:10448001-10448850	ENSG00000115758_ODC1,0;ENSG00000257135_ODC1-DT,0	ENSG00000115758_ODC1,0;ENSG00000257135_ODC1-DT,0			0.0424024	0.344839	Diagnosis	Immature
chr2:15939712-15940242	ENSG00000134323_MYCN,-308	ENSG00000233718_MYCNOS,2007			0.0863159	0.389588	Diagnosis	Immature
chr2:27262668-27263508		ENSG00000115194_SLC30A3,12309			0.0248451	0.313087	Diagnosis	Immature
chr2:29196623-29197473		ENSG00000171094_ALK,724113			0.234316	0.466232	Diagnosis	Immature
chr2:29245970-29246891		ENSG00000171094_ALK,674695			0.623765	0.722336	Diagnosis	Immature
chr2:29254765-29255676		ENSG00000171094_ALK,665910			0.0673002	0.374628	Diagnosis	Immature
chr2:29281278-29282174		ENSG00000171094_ALK,639412			0.0830134	0.387532	Diagnosis	Immature
chr2:29295572-29296461		ENSG00000171094_ALK,625125			0.482015	0.609914	Diagnosis	Immature
chr2:29308853-29309768		ENSG00000171094_ALK,611818			0.893774	0.930905	Diagnosis	Immature
chr2:29314556-29315464		ENSG00000171094_ALK,606122			0.315355	0.508274	Diagnosis	Immature
chr2:29326617-29327433		ENSG00000286963_AC074096.1,7063;ENSG00000171094_ALK,594153			0.0117486	0.265698	Diagnosis	Immature
chr2:29361043-29361837		ENSG00000171094_ALK,559749			0.715302	0.798853	Diagnosis	Immature
chr2:29455101-29456035		ENSG00000171094_ALK,465551			0.877696	0.920046	Diagnosis	Immature
chr2:29528776-29529607		ENSG00000171094_ALK,391979			0.189097	0.444084	Diagnosis	Immature
chr2:29657447-29658381		ENSG00000171094_ALK,263205			0.157842	0.429814	Diagnosis	Immature
chr2:29737462-29738109		ENSG00000171094_ALK,183477			0.097246	0.396252	Diagnosis	Immature
chr2:29742384-29743269		ENSG00000171094_ALK,178317			0.260899	0.479728	Diagnosis	Immature
chr2:29755634-29756543		ENSG00000171094_ALK,165043			0.46379	0.59691	Diagnosis	Immature
chr2:29802765-29803674		ENSG00000171094_ALK,117912			0.305317	0.503082	Diagnosis	Immature
chr2:29818038-29818850		ENSG00000171094_ALK,102736			0.311837	0.506659	Diagnosis	Immature
chr2:29829564-29830480		ENSG00000171094_ALK,91106			0.362796	0.533945	Diagnosis	Immature
chr2:29841143-29842040		ENSG00000171094_ALK,79546;ENSG00000233862_AC016907.2,301764			0.643901	0.739647	Diagnosis	Immature
chr2:29919872-29920722	ENSG00000171094_ALK,864	ENSG00000171094_ALK,864;ENSG00000233862_AC016907.2,223082			0.0644081	0.37153	Diagnosis	Immature
chr2:29921236-29922122	ENSG00000171094_ALK,0	ENSG00000171094_ALK,0;ENSG00000233862_AC016907.2,221682			0.0162779	0.286013	Diagnosis	Immature
chr2:29922940-29923799	ENSG00000171094_ALK,-1354	ENSG00000233862_AC016907.2,220005			0.211518	0.455068	Diagnosis	Immature
chr2:46908728-46909445		ENSG00000180398_MCFD2,32410			0.108103	0.40312	Diagnosis	Immature
chr2:46915542-46916422	ENSG00000068724_TTC7A,0	ENSG00000068724_TTC7A,0;ENSG00000180398_MCFD2,25433			0.00817161	0.243792	Diagnosis	Immature
chr2:46918624-46919525		ENSG00000068724_TTC7A,2467;ENSG00000180398_MCFD2,22330			0.207239	0.453201	Diagnosis	Immature
chr2:46940681-46941607	ENSG00000180398_MCFD2,248	ENSG00000180398_MCFD2,248;ENSG00000068724_TTC7A,24524			0.0788298	0.384825	Diagnosis	Immature
chr2:48694199-48695108		ENSG00000138039_LHCGR,60622;ENSG00000242441_GTF2A1L,76401;ENSG00000068781_STON1-GTF2A1L,164274			0.178831	0.439433	Diagnosis	Immature
chr2:48695724-48696579		ENSG00000138039_LHCGR,59151;ENSG00000242441_GTF2A1L,77926;ENSG00000068781_STON1-GTF2A1L,165799			0.29015	0.495067	Diagnosis	Immature
chr2:48713280-48714176		ENSG00000138039_LHCGR,41554;ENSG00000242441_GTF2A1L,95482;ENSG00000068781_STON1-GTF2A1L,183355			0.162071	0.431384	Diagnosis	Immature
chr2:48719504-48720367		ENSG00000138039_LHCGR,35363;ENSG00000242441_GTF2A1L,101706;ENSG00000068781_STON1-GTF2A1L,189579			0.362598	0.533845	Diagnosis	Immature
chr2:48725460-48726369		ENSG00000138039_LHCGR,29361;ENSG00000242441_GTF2A1L,107662;ENSG00000068781_STON1-GTF2A1L,195535			0.772203	0.84298	Diagnosis	Immature
chr2:48728628-48729523		ENSG00000138039_LHCGR,26207;ENSG00000242441_GTF2A1L,110830;ENSG00000068781_STON1-GTF2A1L,198703			0.0460194	0.350586	Diagnosis	Immature
chr2:48732851-48733732		ENSG00000138039_LHCGR,21998;ENSG00000242441_GTF2A1L,115053;ENSG00000068781_STON1-GTF2A1L,202926			0.164264	0.432729	Diagnosis	Immature
chr2:48748850-48749763		ENSG00000138039_LHCGR,5967;ENSG00000068781_STON1-GTF2A1L,218925			0.0407095	0.343002	Diagnosis	Immature
chr2:48755169-48755985	ENSG00000138039_LHCGR,0	ENSG00000138039_LHCGR,0;ENSG00000068781_STON1-GTF2A1L,225244			0.106099	0.401801	Diagnosis	Immature
chr2:55294796-55295690		ENSG00000240401_AC012358.3,12446;ENSG00000115355_CCDC88A,124205			0.528298	0.644978	Diagnosis	Immature
chr2:55364020-55364889		ENSG00000115355_CCDC88A,55006			0.0702621	0.377699	Diagnosis	Immature
chr2:55403375-55404231		ENSG00000115355_CCDC88A,15664			0.392801	0.551391	Diagnosis	Immature
chr2:55408914-55409695		ENSG00000115355_CCDC88A,10200			0.510531	0.631329	Diagnosis	Immature
chr2:55419506-55420407	ENSG00000115355_CCDC88A,0	ENSG00000115355_CCDC88A,0			0.0354703	0.336486	Diagnosis	Immature
chr2:72915771-72916568	ENSG00000135638_EMX1,0	ENSG00000135638_EMX1,0			0.0575089	0.364142	Diagnosis	Immature
chr2:72917226-72918034	ENSG00000135638_EMX1,966	ENSG00000135638_EMX1,966			0.778242	0.847714	Diagnosis	Immature
chr2:72918327-72918980		ENSG00000135638_EMX1,2067			0.0836218	0.38817	Diagnosis	Immature
chr2:72920097-72921039		ENSG00000135638_EMX1,3837			0.715975	0.799403	Diagnosis	Immature
chr2:75199343-75199938	ENSG00000115353_TACR1,0	ENSG00000115353_TACR1,0			0.466986	0.598985	Diagnosis	Immature
chr2:75200075-75200989	ENSG00000115353_TACR1,-555				0.616302	0.716035	Diagnosis	Immature
chr2:111116862-111117624	ENSG00000153094_BCL2L11,-1754;ENSG00000204581_ACOXL-AS1,-455	ENSG00000153093_ACOXL,384289;ENSG00000172965_MIR4435-2HG,405752			0.150487	0.426247	Diagnosis	Immature
chr2:111120335-111121242	ENSG00000153094_BCL2L11,957	ENSG00000153094_BCL2L11,957;ENSG00000172965_MIR4435-2HG,402134			0.124526	0.412611	Diagnosis	Immature
chr2:111122203-111123007		ENSG00000153094_BCL2L11,2825;ENSG00000172965_MIR4435-2HG,400369			0.100504	0.398056	Diagnosis	Immature
chr2:111155243-111156114		ENSG00000153094_BCL2L11,35865;ENSG00000172965_MIR4435-2HG,367262			0.307827	0.504416	Diagnosis	Immature
chr2:111161676-111162586		ENSG00000153094_BCL2L11,42298;ENSG00000172965_MIR4435-2HG,360790			0.574269	0.681148	Diagnosis	Immature
chr2:119366562-119367379	ENSG00000186132_C2orf76,0;ENSG00000155368_DBI,0	ENSG00000186132_C2orf76,0;ENSG00000155368_DBI,0			0.00155238	0.182746	Diagnosis	Immature
chr2:119370893-119371773		ENSG00000155368_DBI,3972			0.0115084	0.264205	Diagnosis	Immature
chr2:120735497-120736403	ENSG00000074047_GLI2,0	ENSG00000074047_GLI2,0			0.0969672	0.39607	Diagnosis	Immature
chr2:120736959-120737813	ENSG00000074047_GLI2,1336	ENSG00000074047_GLI2,1336			0.911564	0.942486	Diagnosis	Immature
chr2:120741422-120742310		ENSG00000074047_GLI2,5799			0.403157	0.557968	Diagnosis	Immature
chr2:120750279-120751140		ENSG00000074047_GLI2,14656			0.0910683	0.392919	Diagnosis	Immature
chr2:120757924-120758837		ENSG00000074047_GLI2,22301			0.158351	0.429833	Diagnosis	Immature
chr2:120761396-120762318		ENSG00000074047_GLI2,25773			0.118213	0.409038	Diagnosis	Immature
chr2:120780226-120781051		ENSG00000074047_GLI2,44603			0.775952	0.84595	Diagnosis	Immature
chr2:120797330-120798186		ENSG00000074047_GLI2,61707			0.0843478	0.388497	Diagnosis	Immature
chr2:120825568-120826487		ENSG00000074047_GLI2,89945			0.0409706	0.343227	Diagnosis	Immature
chr2:120858075-120858990		ENSG00000074047_GLI2,122452			0.296494	0.498496	Diagnosis	Immature
chr2:120867136-120867997	ENSG00000271709_AC017033.1,0	ENSG00000271709_AC017033.1,0;ENSG00000074047_GLI2,131513			0.135905	0.418719	Diagnosis	Immature
chr2:120879262-120880052		ENSG00000074047_GLI2,143639			0.294407	0.49741	Diagnosis	Immature
chr2:120912095-120912911		ENSG00000074047_GLI2,176472			0.457644	0.592633	Diagnosis	Immature
chr2:120914544-120915454		ENSG00000074047_GLI2,178921			0.713577	0.797463	Diagnosis	Immature
chr2:136118993-136119818	ENSG00000121966_CXCR4,-828				0.187423	0.443439	Diagnosis	Immature
chr2:161414158-161415078	ENSG00000136535_TBR1,-1219				0.21616	0.457454	Diagnosis	Immature
chr2:161418461-161419311		ENSG00000136535_TBR1,2164			0.849998	0.900323	Diagnosis	Immature
chr2:161423263-161424132	ENSG00000144290_SLC4A10,-200;ENSG00000224076_AC009487.1,0;ENSG00000251621_AC009487.3,0	ENSG00000224076_AC009487.1,0;ENSG00000251621_AC009487.3,0;ENSG00000136535_TBR1,6966			0.151353	0.426687	Diagnosis	Immature
chr2:169131651-169132534		ENSG00000081479_LRP2,230000			0.403094	0.557914	Diagnosis	Immature
chr2:169221498-169222357		ENSG00000081479_LRP2,140177			0.044956	0.348857	Diagnosis	Immature
chr2:169246482-169247268		ENSG00000081479_LRP2,115266			0.0295209	0.325688	Diagnosis	Immature
chr2:169247425-169248049		ENSG00000081479_LRP2,114485			0.721157	0.803421	Diagnosis	Immature
chr2:169345407-169346343		ENSG00000081479_LRP2,16191			0.923686	0.950573	Diagnosis	Immature
chr2:169348153-169349024		ENSG00000081479_LRP2,13510			0.0206548	0.30055	Diagnosis	Immature
chr2:169362049-169362695	ENSG00000081479_LRP2,0	ENSG00000081479_LRP2,0			0.68422	0.773599	Diagnosis	Immature
chr2:169364128-169364873	ENSG00000081479_LRP2,-1594				0.772843	0.843488	Diagnosis	Immature
chr2:170812511-170813369	ENSG00000128683_GAD1,0;ENSG00000234350_AC007405.1,301	ENSG00000128683_GAD1,0;ENSG00000234350_AC007405.1,301			0.877882	0.92016	Diagnosis	Immature
chr2:170815436-170816239	ENSG00000234350_AC007405.1,-1766;ENSG00000235934_AC007405.2,1798	ENSG00000235934_AC007405.2,1798;ENSG00000128683_GAD1,2223			0.0738076	0.380735	Diagnosis	Immature
chr2:170817893-170818775	ENSG00000235934_AC007405.2,0	ENSG00000235934_AC007405.2,0;ENSG00000128683_GAD1,4680			0.0378774	0.34044	Diagnosis	Immature
chr2:170823149-170824087	ENSG00000286611_AC007405.4,-1854	ENSG00000128683_GAD1,9936			0.977463	0.986101	Diagnosis	Immature
chr2:170828780-170829595		ENSG00000128683_GAD1,15567			0.451883	0.588639	Diagnosis	Immature
chr2:170851433-170852318		ENSG00000128683_GAD1,38220			0.0545734	0.361163	Diagnosis	Immature
chr2:175146446-175147315		ENSG00000115966_ATF2,21067			0.245658	0.472114	Diagnosis	Immature
chr2:175167936-175168789	ENSG00000115966_ATF2,0;ENSG00000229750_AC096649.1,32	ENSG00000115966_ATF2,0;ENSG00000229750_AC096649.1,32			0.0485973	0.353704	Diagnosis	Immature
chr2:181672885-181673709		ENSG00000188452_CERKL,6956;ENSG00000162992_NEUROD1,7167			0.379815	0.543662	Diagnosis	Immature
chr2:181674574-181675060		ENSG00000188452_CERKL,5605;ENSG00000162992_NEUROD1,5816			0.600163	0.702565	Diagnosis	Immature
chr2:181677789-181678645		ENSG00000188452_CERKL,2020;ENSG00000162992_NEUROD1,2231			0.0660718	0.373369	Diagnosis	Immature
chr2:181680277-181681142	ENSG00000234595_AC013733.2,-1971;ENSG00000188452_CERKL,0;ENSG00000162992_NEUROD1,0	ENSG00000188452_CERKL,0;ENSG00000162992_NEUROD1,0			0.797587	0.862182	Diagnosis	Immature
chr2:182866171-182866701	ENSG00000162998_FRZB,0	ENSG00000162998_FRZB,0			0.0658666	0.373185	Diagnosis	Immature
chr2:182866822-182867495	ENSG00000162998_FRZB,-185				0.104169	0.400456	Diagnosis	Immature
chr2:207529504-207530396	ENSG00000118260_CREB1,0;ENSG00000223725_AC009226.1,0	ENSG00000223725_AC009226.1,0;ENSG00000118260_CREB1,0			0.0143675	0.277264	Diagnosis	Immature
chr2:207577063-207577925		ENSG00000118260_CREB1,47326			0.768171	0.839843	Diagnosis	Immature
chr2:207578352-207579138		ENSG00000118260_CREB1,48615			0.0665078	0.373892	Diagnosis	Immature
chr2:209423483-209424396	ENSG00000078018_MAP2,0	ENSG00000078018_MAP2,0			0.025229	0.314294	Diagnosis	Immature
chr2:209426418-209427117		ENSG00000078018_MAP2,2360			0.565578	0.674187	Diagnosis	Immature
chr2:209441303-209442166		ENSG00000078018_MAP2,17245			0.7795	0.848645	Diagnosis	Immature
chr2:209451176-209452037		ENSG00000078018_MAP2,27118			0.241813	0.470334	Diagnosis	Immature
chr2:209457702-209458624		ENSG00000078018_MAP2,33644			0.644278	0.739952	Diagnosis	Immature
chr2:209472213-209473014		ENSG00000078018_MAP2,48155			0.463193	0.59648	Diagnosis	Immature
chr2:209476535-209477315		ENSG00000078018_MAP2,52477			0.295599	0.497958	Diagnosis	Immature
chr2:209557338-209558199		ENSG00000078018_MAP2,133280			0.0976926	0.39642	Diagnosis	Immature
chr2:209565861-209566790		ENSG00000078018_MAP2,141803			0.468142	0.599752	Diagnosis	Immature
chr2:209577179-209577985		ENSG00000078018_MAP2,153121			0.249912	0.473908	Diagnosis	Immature
chr2:209579094-209580012		ENSG00000078018_MAP2,155036			0.0307398	0.327704	Diagnosis	Immature
chr2:209584551-209585465		ENSG00000078018_MAP2,160493			0.252508	0.475415	Diagnosis	Immature
chr2:209619525-209620412		ENSG00000078018_MAP2,195467			0.211442	0.455068	Diagnosis	Immature
chr2:209629423-209630261		ENSG00000078018_MAP2,205365			0.482642	0.610414	Diagnosis	Immature
chr2:209635795-209636685		ENSG00000078018_MAP2,211737			0.190072	0.444306	Diagnosis	Immature
chr2:209661047-209661930		ENSG00000078018_MAP2,236989			0.956302	0.972498	Diagnosis	Immature
chr2:209662940-209663791		ENSG00000078018_MAP2,238882			0.146022	0.42412	Diagnosis	Immature
chr2:209671093-209671970		ENSG00000078018_MAP2,247035			0.153179	0.42759	Diagnosis	Immature
chr2:209687464-209688266		ENSG00000078018_MAP2,263406			0.205602	0.45237	Diagnosis	Immature
chr2:209690457-209691223		ENSG00000078018_MAP2,266399			0.269839	0.484245	Diagnosis	Immature
chr2:221426569-221427413		ENSG00000116106_EPHA4,146789			0.207314	0.453221	Diagnosis	Immature
chr2:221484807-221485749		ENSG00000116106_EPHA4,88453			0.879555	0.921322	Diagnosis	Immature
chr2:221530260-221531108		ENSG00000116106_EPHA4,43094			0.0110963	0.2629	Diagnosis	Immature
chr2:221541055-221541877		ENSG00000116106_EPHA4,32325			0.996031	0.997531	Diagnosis	Immature
chr2:221554912-221555848		ENSG00000116106_EPHA4,18354			0.204897	0.452022	Diagnosis	Immature
chr2:221569185-221569940		ENSG00000116106_EPHA4,4262			0.229907	0.463932	Diagnosis	Immature
chr2:221571931-221572765	ENSG00000272944_AC079834.2,0;ENSG00000116106_EPHA4,1437	ENSG00000272944_AC079834.2,0;ENSG00000116106_EPHA4,1437			0.143112	0.422842	Diagnosis	Immature
chr2:221573213-221574082	ENSG00000116106_EPHA4,120;ENSG00000272944_AC079834.2,707	ENSG00000116106_EPHA4,120;ENSG00000272944_AC079834.2,707			0.0194391	0.2971	Diagnosis	Immature
chr2:223993428-223994343		ENSG00000135919_SERPINE2,44975			0.622647	0.721373	Diagnosis	Immature
chr2:224039023-224039904	ENSG00000135919_SERPINE2,0	ENSG00000135919_SERPINE2,0			0.246025	0.472236	Diagnosis	Immature
chr2:236569390-236570263	ENSG00000144476_ACKR3,1603	ENSG00000144476_ACKR3,1603			0.0540272	0.360447	Diagnosis	Immature
chr2:236577319-236578172		ENSG00000144476_ACKR3,9532			0.489584	0.615551	Diagnosis	Immature
chr2:236579565-236580457		ENSG00000144476_ACKR3,11778			0.770776	0.841811	Diagnosis	Immature
chr2:238251077-238251920		ENSG00000225057_AC012485.1,19393;ENSG00000132326_PER2,38182			0.46777	0.599504	Diagnosis	Immature
chr2:238263174-238264069		ENSG00000132326_PER2,26033			0.270416	0.484592	Diagnosis	Immature
chr2:238287385-238287936	ENSG00000283635_AC012485.3,-1191	ENSG00000132326_PER2,2166			0.0565578	0.36247	Diagnosis	Immature
chr2:238288442-238289362	ENSG00000283635_AC012485.3,0;ENSG00000132326_PER2,740	ENSG00000283635_AC012485.3,0;ENSG00000132326_PER2,740			0.0358876	0.337096	Diagnosis	Immature
chr20:4686178-4686821	ENSG00000171867_PRNP,0	ENSG00000171867_PRNP,0			0.00279557	0.196728	Diagnosis	Immature
chr20:4686937-4687446	ENSG00000171867_PRNP,587	ENSG00000171867_PRNP,587			0.0115185	0.264205	Diagnosis	Immature
chr20:4697272-4698197		ENSG00000171867_PRNP,10922			0.982518	0.989261	Diagnosis	Immature
chr20:4699111-4699958		ENSG00000171867_PRNP,12761			0.491142	0.616573	Diagnosis	Immature
chr20:8094118-8095042		ENSG00000182621_PLCB1,16867			0.402664	0.557617	Diagnosis	Immature
chr20:8131783-8132642		ENSG00000182621_PLCB1,54532			0.0488128	0.354011	Diagnosis	Immature
chr20:8168027-8168902		ENSG00000182621_PLCB1,90776			0.303857	0.502164	Diagnosis	Immature
chr20:8175982-8176819		ENSG00000182621_PLCB1,98731			0.173569	0.436418	Diagnosis	Immature
chr20:8275033-8275922		ENSG00000182621_PLCB1,197782			0.3123	0.506873	Diagnosis	Immature
chr20:8303554-8304332		ENSG00000182621_PLCB1,226303			0.213439	0.456054	Diagnosis	Immature
chr20:8309278-8310131		ENSG00000182621_PLCB1,232027			0.0504332	0.356181	Diagnosis	Immature
chr20:8343887-8344790		ENSG00000182621_PLCB1,266636			0.177114	0.43835	Diagnosis	Immature
chr20:8360936-8361817		ENSG00000182621_PLCB1,283685			0.468619	0.600101	Diagnosis	Immature
chr20:8385039-8385906		ENSG00000182621_PLCB1,307788			0.267307	0.482884	Diagnosis	Immature
chr20:8389345-8390048		ENSG00000182621_PLCB1,312094			0.244588	0.471848	Diagnosis	Immature
chr20:8432051-8432738		ENSG00000182621_PLCB1,354800			0.26733	0.482884	Diagnosis	Immature
chr20:8448943-8449866		ENSG00000182621_PLCB1,371692			0.19552	0.447066	Diagnosis	Immature
chr20:8454023-8454876		ENSG00000182621_PLCB1,376772			0.194025	0.446136	Diagnosis	Immature
chr20:8529495-8530237		ENSG00000182621_PLCB1,452244			0.347098	0.525615	Diagnosis	Immature
chr20:8534053-8535017		ENSG00000182621_PLCB1,456802			0.247004	0.472752	Diagnosis	Immature
chr20:8562071-8562947		ENSG00000182621_PLCB1,484820			0.182146	0.441147	Diagnosis	Immature
chr20:8601202-8602101		ENSG00000182621_PLCB1,523951			0.195386	0.447001	Diagnosis	Immature
chr20:8616523-8617389		ENSG00000182621_PLCB1,539272			0.214914	0.456861	Diagnosis	Immature
chr20:8623283-8624157		ENSG00000182621_PLCB1,546032			0.257006	0.477841	Diagnosis	Immature
chr20:8627411-8628078		ENSG00000182621_PLCB1,550160			0.227458	0.462672	Diagnosis	Immature
chr20:8647626-8648532		ENSG00000182621_PLCB1,570375			0.212039	0.455369	Diagnosis	Immature
chr20:8719784-8720532		ENSG00000182621_PLCB1,642533			0.38868	0.548814	Diagnosis	Immature
chr20:8720851-8721704		ENSG00000182621_PLCB1,643600			0.219445	0.459051	Diagnosis	Immature
chr20:8722146-8722985		ENSG00000182621_PLCB1,644895			0.163018	0.431895	Diagnosis	Immature
chr20:8756322-8757004		ENSG00000182621_PLCB1,679071			0.110347	0.404336	Diagnosis	Immature
chr20:8764226-8765080		ENSG00000182621_PLCB1,686975			0.131549	0.416053	Diagnosis	Immature
chr20:8790146-8791015		ENSG00000182621_PLCB1,712895			0.317364	0.509487	Diagnosis	Immature
chr20:8853520-8854405		ENSG00000182621_PLCB1,776269			0.0517522	0.357918	Diagnosis	Immature
chr20:8912434-8913288		ENSG00000182621_PLCB1,835183			0.154397	0.427975	Diagnosis	Immature
chr20:8931941-8932788		ENSG00000182621_PLCB1,854690			0.596674	0.699535	Diagnosis	Immature
chr20:10217273-10218101	ENSG00000132639_SNAP25,-729	ENSG00000227906_SNAP25-AS1,150675			0.343256	0.523827	Diagnosis	Immature
chr20:10219259-10220008	ENSG00000132639_SNAP25,429	ENSG00000132639_SNAP25,429;ENSG00000227906_SNAP25-AS1,148768			0.23155	0.464892	Diagnosis	Immature
chr20:10253494-10254297		ENSG00000132639_SNAP25,34664;ENSG00000227906_SNAP25-AS1,114479			0.740695	0.818935	Diagnosis	Immature
chr20:10263668-10264595		ENSG00000132639_SNAP25,44838;ENSG00000227906_SNAP25-AS1,104181			0.066954	0.374392	Diagnosis	Immature
chr20:10271310-10272172		ENSG00000132639_SNAP25,52480;ENSG00000227906_SNAP25-AS1,96604			0.244123	0.47156	Diagnosis	Immature
chr20:10278497-10279441		ENSG00000132639_SNAP25,59667;ENSG00000227906_SNAP25-AS1,89335			0.0355929	0.336656	Diagnosis	Immature
chr20:10639413-10640263		ENSG00000101384_JAG1,33736			0.268002	0.483235	Diagnosis	Immature
chr20:10650946-10651821		ENSG00000101384_JAG1,22178			0.186376	0.44292	Diagnosis	Immature
chr20:10653328-10654107		ENSG00000101384_JAG1,19892			0.187894	0.443605	Diagnosis	Immature
chr20:10666711-10667582		ENSG00000101384_JAG1,6417			0.265539	0.481868	Diagnosis	Immature
chr20:10673734-10674582	ENSG00000101384_JAG1,0;ENSG00000270792_AL050403.2,1039	ENSG00000101384_JAG1,0;ENSG00000270792_AL050403.2,1039			0.359364	0.532139	Diagnosis	Immature
chr20:20369119-20370043	ENSG00000173404_INSM1,1015	ENSG00000173404_INSM1,1015			0.0255724	0.31554	Diagnosis	Immature
chr20:23635988-23636810	ENSG00000101439_CST3,1663	ENSG00000101439_CST3,1663			0.185257	0.442365	Diagnosis	Immature
chr20:23637522-23638381	ENSG00000101439_CST3,92	ENSG00000101439_CST3,92			0.0616278	0.3685	Diagnosis	Immature
chr20:23823248-23824065		ENSG00000170369_CST2,2664			0.330295	0.516528	Diagnosis	Immature
chr20:31603856-31604630	ENSG00000125968_ID1,-653				0.0657181	0.373091	Diagnosis	Immature
chr20:31604897-31605709	ENSG00000125968_ID1,0	ENSG00000125968_ID1,0			0.0701787	0.377669	Diagnosis	Immature
chr20:31664207-31665004		ENSG00000171552_BCL2L1,58985			0.186795	0.443184	Diagnosis	Immature
chr20:31666317-31667201		ENSG00000171552_BCL2L1,56788			0.76189	0.835073	Diagnosis	Immature
chr20:31670185-31671098		ENSG00000171552_BCL2L1,52891			0.0073383	0.239832	Diagnosis	Immature
chr20:31674661-31675529		ENSG00000171552_BCL2L1,48460			0.0878907	0.390891	Diagnosis	Immature
chr20:31675735-31676484		ENSG00000171552_BCL2L1,47505			0.145566	0.424077	Diagnosis	Immature
chr20:31684084-31684998	ENSG00000236559_AL117381.1,-1218	ENSG00000171552_BCL2L1,38991			0.443056	0.582738	Diagnosis	Immature
chr20:31698905-31699827		ENSG00000236559_AL117381.1,12689;ENSG00000171552_BCL2L1,24162			0.0633928	0.369932	Diagnosis	Immature
chr20:31705645-31706574		ENSG00000171552_BCL2L1,17415;ENSG00000236559_AL117381.1,19429			0.130562	0.415513	Diagnosis	Immature
chr20:31708082-31708931		ENSG00000171552_BCL2L1,15058;ENSG00000236559_AL117381.1,21866			0.234922	0.46641	Diagnosis	Immature
chr20:31712344-31713263		ENSG00000171552_BCL2L1,10726;ENSG00000236559_AL117381.1,26128			0.267186	0.482826	Diagnosis	Immature
chr20:31723226-31724124	ENSG00000171552_BCL2L1,0;ENSG00000281376_ABALON,1719	ENSG00000171552_BCL2L1,0;ENSG00000281376_ABALON,1719			0.0168255	0.288198	Diagnosis	Immature
chr20:33686080-33686980	ENSG00000101412_E2F1,0	ENSG00000101412_E2F1,0			0.161955	0.431259	Diagnosis	Immature
chr20:41136744-41137615	ENSG00000124181_PLCG1,0;ENSG00000226648_PLCG1-AS1,388	ENSG00000124181_PLCG1,0;ENSG00000226648_PLCG1-AS1,388			0.00589435	0.229495	Diagnosis	Immature
chr20:41145612-41146495		ENSG00000124181_PLCG1,8652			0.0430898	0.346011	Diagnosis	Immature
chr20:41147541-41148435		ENSG00000124181_PLCG1,10581			0.966587	0.979078	Diagnosis	Immature
chr20:41150414-41151323		ENSG00000124181_PLCG1,13454			0.165228	0.433315	Diagnosis	Immature
chr20:41161644-41162526		ENSG00000124181_PLCG1,24684			0.530791	0.646862	Diagnosis	Immature
chr20:41172852-41173731		ENSG00000124181_PLCG1,35892			0.122859	0.41147	Diagnosis	Immature
chr20:41177371-41178236		ENSG00000124181_PLCG1,40411			0.121826	0.410837	Diagnosis	Immature
chr20:41178772-41179676		ENSG00000124181_PLCG1,41812;ENSG00000174306_ZHX3,137996			0.151501	0.426739	Diagnosis	Immature
chr20:41184758-41185635		ENSG00000124181_PLCG1,47798;ENSG00000174306_ZHX3,132037			0.326709	0.514663	Diagnosis	Immature
chr20:46013785-46014662		ENSG00000100985_MMP9,4877;ENSG00000204044_SLC12A5-AS1,7411			0.242613	0.470714	Diagnosis	Immature
chr20:46021398-46022326	ENSG00000124140_SLC12A5,0;ENSG00000204044_SLC12A5-AS1,0	ENSG00000204044_SLC12A5-AS1,0;ENSG00000124140_SLC12A5,0			0.0802098	0.385898	Diagnosis	Immature
chr20:46022629-46023470	ENSG00000204044_SLC12A5-AS1,-556;ENSG00000124140_SLC12A5,939	ENSG00000124140_SLC12A5,939			0.85311	0.902611	Diagnosis	Immature
chr20:46025158-46026043		ENSG00000124140_SLC12A5,3468			0.390276	0.549884	Diagnosis	Immature
chr20:46028739-46029654		ENSG00000124140_SLC12A5,7049			0.935331	0.958264	Diagnosis	Immature
chr20:46031547-46032498		ENSG00000124140_SLC12A5,9857			0.249165	0.473625	Diagnosis	Immature
chr20:46051533-46052374		ENSG00000124140_SLC12A5,29843			0.286741	0.493338	Diagnosis	Immature
chr21:25881474-25882331		ENSG00000142192_APP,288797			0.711115	0.795456	Diagnosis	Immature
chr21:25895543-25896385		ENSG00000142192_APP,274743			0.111784	0.405165	Diagnosis	Immature
chr21:25907748-25908578		ENSG00000142192_APP,262550			0.550096	0.66179	Diagnosis	Immature
chr21:25911836-25912710		ENSG00000142192_APP,258418			0.070856	0.378089	Diagnosis	Immature
chr21:25924800-25925700		ENSG00000142192_APP,245428			0.14526	0.423907	Diagnosis	Immature
chr21:25925906-25926694		ENSG00000142192_APP,244434			0.156776	0.428991	Diagnosis	Immature
chr21:25929723-25930637	ENSG00000233783_AP001442.1,969	ENSG00000233783_AP001442.1,969;ENSG00000142192_APP,240491			0.34745	0.525817	Diagnosis	Immature
chr21:25944440-25945350		ENSG00000233783_AP001442.1,15686;ENSG00000142192_APP,225778			0.072495	0.379608	Diagnosis	Immature
chr21:25967464-25968290		ENSG00000142192_APP,202838			0.136928	0.418886	Diagnosis	Immature
chr21:25970206-25971105		ENSG00000142192_APP,200023			0.00493713	0.220482	Diagnosis	Immature
chr21:25979844-25980671		ENSG00000142192_APP,190457			0.161131	0.430856	Diagnosis	Immature
chr21:25983530-25984420		ENSG00000142192_APP,186708			0.104682	0.400934	Diagnosis	Immature
chr21:25994898-25995640		ENSG00000142192_APP,175488			0.315403	0.508311	Diagnosis	Immature
chr21:25997837-25998747		ENSG00000142192_APP,172381			0.304735	0.502734	Diagnosis	Immature
chr21:26007862-26008715		ENSG00000142192_APP,162413			0.350665	0.527453	Diagnosis	Immature
chr21:26011054-26011932		ENSG00000142192_APP,159196			0.153654	0.427631	Diagnosis	Immature
chr21:26019092-26019945		ENSG00000142192_APP,151183			0.359647	0.532301	Diagnosis	Immature
chr21:26033272-26034184		ENSG00000142192_APP,136944			0.0847403	0.388656	Diagnosis	Immature
chr21:26041365-26042246		ENSG00000142192_APP,128882			0.276875	0.488077	Diagnosis	Immature
chr21:26057353-26058160		ENSG00000142192_APP,112968			0.244246	0.471686	Diagnosis	Immature
chr21:26072769-26073731		ENSG00000142192_APP,97397			0.195379	0.447001	Diagnosis	Immature
chr21:26077227-26077943		ENSG00000142192_APP,93185			0.438081	0.579481	Diagnosis	Immature
chr21:26089525-26090445		ENSG00000142192_APP,80683			0.166198	0.433831	Diagnosis	Immature
chr21:26099418-26100276		ENSG00000142192_APP,70852			0.893756	0.930903	Diagnosis	Immature
chr21:26115917-26116597		ENSG00000142192_APP,54531			0.182887	0.441556	Diagnosis	Immature
chr21:26127645-26128490		ENSG00000142192_APP,42638			0.183966	0.441888	Diagnosis	Immature
chr21:26139955-26140856		ENSG00000142192_APP,30272			0.409566	0.561644	Diagnosis	Immature
chr21:26147811-26148624		ENSG00000142192_APP,22504			0.361589	0.53334	Diagnosis	Immature
chr21:26157765-26158609	ENSG00000224541_AP001439.1,0	ENSG00000224541_AP001439.1,0;ENSG00000142192_APP,12519			0.176912	0.43818	Diagnosis	Immature
chr21:26166142-26166905		ENSG00000142192_APP,4223;ENSG00000224541_AP001439.1,8051			0.320864	0.511378	Diagnosis	Immature
chr21:26169084-26169955	ENSG00000273492_AP000229.1,-916;ENSG00000142192_APP,1173	ENSG00000142192_APP,1173;ENSG00000224541_AP001439.1,10993			0.315885	0.508621	Diagnosis	Immature
chr21:26170355-26171235	ENSG00000273492_AP000229.1,0;ENSG00000142192_APP,0	ENSG00000142192_APP,0;ENSG00000273492_AP000229.1,0;ENSG00000224541_AP001439.1,12264			0.00256018	0.195293	Diagnosis	Immature
chr21:33023483-33023997	ENSG00000205927_OLIG2,-1938	ENSG00000227757_AP000282.1,47107			0.337263	0.520245	Diagnosis	Immature
chr21:33025307-33026184	ENSG00000205927_OLIG2,0	ENSG00000205927_OLIG2,0;ENSG00000227757_AP000282.1,44920			0.00247618	0.193871	Diagnosis	Immature
chr21:33229599-33230391	ENSG00000159110_IFNAR2,0	ENSG00000159110_IFNAR2,0			0.00128093	0.180403	Diagnosis	Immature
chr21:33324377-33325312	ENSG00000142166_IFNAR1,0	ENSG00000142166_IFNAR1,0			0.0121973	0.268413	Diagnosis	Immature
chr21:37366073-37367003	ENSG00000273210_AP001437.1,-141;ENSG00000287637_AP001437.2,0;ENSG00000157540_DYRK1A,500	ENSG00000287637_AP001437.2,0;ENSG00000157540_DYRK1A,500			0.0142971	0.27686	Diagnosis	Immature
chr21:37367708-37368426	ENSG00000273210_AP001437.1,-1776;ENSG00000287637_AP001437.2,-850	ENSG00000157540_DYRK1A,2135			0.167705	0.434265	Diagnosis	Immature
chr21:37386410-37387237		ENSG00000157540_DYRK1A,20837			0.876813	0.919448	Diagnosis	Immature
chr21:37434845-37435737		ENSG00000157540_DYRK1A,69272			0.396875	0.553662	Diagnosis	Immature
chr21:37445052-37445982		ENSG00000157540_DYRK1A,79479			0.688253	0.776965	Diagnosis	Immature
chr21:37452088-37453018		ENSG00000157540_DYRK1A,86515			0.0963334	0.395592	Diagnosis	Immature
chr21:37462989-37463888		ENSG00000157540_DYRK1A,97416			0.21669	0.457734	Diagnosis	Immature
chr21:46604781-46605651	ENSG00000160307_S100B,0	ENSG00000160307_S100B,0			0.0367159	0.33845	Diagnosis	Immature
chr21:46606110-46606833	ENSG00000160307_S100B,-902				0.396642	0.553489	Diagnosis	Immature
chr22:20079697-20080594	ENSG00000128191_DGCR8,0	ENSG00000128191_DGCR8,0			0.0271138	0.31982	Diagnosis	Immature
chr22:20090148-20091059		ENSG00000128191_DGCR8,9916			0.2497	0.473834	Diagnosis	Immature
chr22:20093173-20094005		ENSG00000128191_DGCR8,12941			0.16588	0.433692	Diagnosis	Immature
chr22:20094270-20095044		ENSG00000128191_DGCR8,14038			0.122092	0.411032	Diagnosis	Immature
chr22:20106174-20107060		ENSG00000128191_DGCR8,25942			0.120587	0.410225	Diagnosis	Immature
chr22:20111661-20112582	ENSG00000243762_AC006547.2,0	ENSG00000243762_AC006547.2,0;ENSG00000099899_TRMT2A,4810;ENSG00000128191_DGCR8,31429			0.131696	0.41626	Diagnosis	Immature
chr22:21754746-21755566		ENSG00000100030_MAPK1,112114			0.0320885	0.330908	Diagnosis	Immature
chr22:21762717-21763620		ENSG00000100030_MAPK1,104060			0.104063	0.400357	Diagnosis	Immature
chr22:21772481-21773263		ENSG00000100030_MAPK1,94417			0.382405	0.545162	Diagnosis	Immature
chr22:21774744-21775684		ENSG00000100030_MAPK1,91996			0.910438	0.941766	Diagnosis	Immature
chr22:21791440-21792288		ENSG00000100030_MAPK1,75392			0.437803	0.579273	Diagnosis	Immature
chr22:21796621-21797459		ENSG00000100030_MAPK1,70221			0.216074	0.457374	Diagnosis	Immature
chr22:21803581-21804496		ENSG00000100030_MAPK1,63184			0.217428	0.458103	Diagnosis	Immature
chr22:21816659-21817394		ENSG00000100030_MAPK1,50286			0.183292	0.441682	Diagnosis	Immature
chr22:21832258-21833113		ENSG00000100030_MAPK1,34567			0.199751	0.449184	Diagnosis	Immature
chr22:21837265-21838121		ENSG00000100030_MAPK1,29559			0.301641	0.501017	Diagnosis	Immature
chr22:21867259-21868152	ENSG00000100030_MAPK1,0	ENSG00000100030_MAPK1,0			0.21297	0.455876	Diagnosis	Immature
chr22:23893918-23894769	ENSG00000240972_MIF,0	ENSG00000240972_MIF,0;ENSG00000218537_MIF-AS1,4161			0.0117151	0.265482	Diagnosis	Immature
chr22:29480612-29481431	ENSG00000225465_RFPL1S,-1744;ENSG00000282816_AC000035.1,0;ENSG00000100285_NEFH,394	ENSG00000282816_AC000035.1,0;ENSG00000100285_NEFH,394			0.371401	0.538749	Diagnosis	Immature
chr22:30246074-30246904	ENSG00000268812_AC004264.1,0;ENSG00000128342_LIF,0	ENSG00000128342_LIF,0;ENSG00000268812_AC004264.1,0			0.848603	0.899255	Diagnosis	Immature
chr22:32520912-32521723		ENSG00000185666_SYN3,536649			0.0110296	0.262281	Diagnosis	Immature
chr22:32528322-32528589		ENSG00000185666_SYN3,529783			0.290785	0.495501	Diagnosis	Immature
chr22:32528717-32529452		ENSG00000185666_SYN3,528920			0.455995	0.591595	Diagnosis	Immature
chr22:32531967-32532849		ENSG00000185666_SYN3,525523			0.950256	0.968241	Diagnosis	Immature
chr22:32582913-32583686	ENSG00000236054_Z82246.1,0	ENSG00000236054_Z82246.1,0;ENSG00000185666_SYN3,474686			0.634277	0.7312	Diagnosis	Immature
chr22:32618040-32618907		ENSG00000185666_SYN3,439465			0.0754658	0.382052	Diagnosis	Immature
chr22:32634034-32634882		ENSG00000185666_SYN3,423490			0.298747	0.499527	Diagnosis	Immature
chr22:32636667-32637549		ENSG00000185666_SYN3,420823			0.271752	0.485134	Diagnosis	Immature
chr22:32657202-32658027		ENSG00000185666_SYN3,400345			0.10533	0.401342	Diagnosis	Immature
chr22:32696189-32697074		ENSG00000185666_SYN3,361298			0.0306527	0.327563	Diagnosis	Immature
chr22:32707725-32708440		ENSG00000185666_SYN3,349932			0.001308	0.181017	Diagnosis	Immature
chr22:32708569-32709302		ENSG00000185666_SYN3,349070			0.223475	0.461041	Diagnosis	Immature
chr22:32723340-32724232		ENSG00000185666_SYN3,334140			0.93671	0.959092	Diagnosis	Immature
chr22:32764267-32765113		ENSG00000185666_SYN3,293259			0.78474	0.852635	Diagnosis	Immature
chr22:32794583-32795448		ENSG00000185666_SYN3,262924			0.833355	0.888302	Diagnosis	Immature
chr22:32796650-32797526		ENSG00000185666_SYN3,260846			0.825663	0.882771	Diagnosis	Immature
chr22:32801233-32802132	ENSG00000100234_TIMP3,0	ENSG00000100234_TIMP3,0;ENSG00000185666_SYN3,256240			0.0771766	0.383174	Diagnosis	Immature
chr22:32804608-32805360		ENSG00000100234_TIMP3,2907;ENSG00000185666_SYN3,253012			0.121298	0.410463	Diagnosis	Immature
chr22:32829275-32830175		ENSG00000100234_TIMP3,27574;ENSG00000185666_SYN3,228197			0.830389	0.886109	Diagnosis	Immature
chr22:32846772-32847692		ENSG00000100234_TIMP3,45071;ENSG00000185666_SYN3,210680			0.957308	0.973056	Diagnosis	Immature
chr22:32850593-32851519		ENSG00000100234_TIMP3,48892;ENSG00000185666_SYN3,206853			0.385739	0.547016	Diagnosis	Immature
chr22:32854224-32855079		ENSG00000100234_TIMP3,52523;ENSG00000185666_SYN3,203293			0.486964	0.613574	Diagnosis	Immature
chr22:32880665-32881590		ENSG00000185666_SYN3,176782			0.118623	0.409337	Diagnosis	Immature
chr22:32900720-32901557		ENSG00000185666_SYN3,156815			0.390117	0.549756	Diagnosis	Immature
chr22:32903810-32904525		ENSG00000185666_SYN3,153847			0.186094	0.442773	Diagnosis	Immature
chr22:32905302-32906126		ENSG00000185666_SYN3,152246			0.54376	0.656844	Diagnosis	Immature
chr22:32909310-32910190		ENSG00000185666_SYN3,148182			0.452592	0.589094	Diagnosis	Immature
chr22:32917402-32918328		ENSG00000185666_SYN3,140044			0.469471	0.600708	Diagnosis	Immature
chr22:32951574-32952470		ENSG00000185666_SYN3,105902			0.243597	0.471279	Diagnosis	Immature
chr22:32985798-32986687		ENSG00000185666_SYN3,71685			0.10324	0.399884	Diagnosis	Immature
chr22:32987057-32987878		ENSG00000185666_SYN3,70494			0.0813671	0.386424	Diagnosis	Immature
chr22:32991344-32992275		ENSG00000185666_SYN3,66097			0.757523	0.831753	Diagnosis	Immature
chr22:32994005-32994707		ENSG00000185666_SYN3,63665			0.267827	0.483166	Diagnosis	Immature
chr22:33000394-33001274		ENSG00000185666_SYN3,57098			0.187088	0.443272	Diagnosis	Immature
chr22:33018026-33018901		ENSG00000185666_SYN3,39471			0.551203	0.662649	Diagnosis	Immature
chr22:33027861-33028764		ENSG00000185666_SYN3,29608			0.365716	0.535439	Diagnosis	Immature
chr22:33038047-33038813		ENSG00000185666_SYN3,19559			0.815554	0.875342	Diagnosis	Immature
chr22:33043838-33044719		ENSG00000185666_SYN3,13653			0.604193	0.705928	Diagnosis	Immature
chr22:33049025-33049858		ENSG00000185666_SYN3,8514			0.0804223	0.38615	Diagnosis	Immature
chr22:33052152-33052917		ENSG00000185666_SYN3,5455			0.394328	0.552265	Diagnosis	Immature
chr22:33057834-33058691	ENSG00000185666_SYN3,0	ENSG00000185666_SYN3,0			0.112457	0.405695	Diagnosis	Immature
chr22:37674846-37675735	ENSG00000100097_LGALS1,0	ENSG00000100097_LGALS1,0			0.193015	0.44568	Diagnosis	Immature
chr22:46149957-46150845	ENSG00000186951_PPARA,0	ENSG00000186951_PPARA,0			0.071621	0.37888	Diagnosis	Immature
chr22:46230055-46230879		ENSG00000186951_PPARA,79534			0.115017	0.40746	Diagnosis	Immature
chr22:46233018-46233929		ENSG00000186951_PPARA,82497			0.809488	0.870835	Diagnosis	Immature
chr22:46238246-46239149		ENSG00000186951_PPARA,87725			0.694251	0.781829	Diagnosis	Immature
chr3:10286702-10287553	ENSG00000240288_GHRLOS,948	ENSG00000240288_GHRLOS,948;ENSG00000157017_GHRL,5394			0.219335	0.458949	Diagnosis	Immature
chr3:13822777-13823615		ENSG00000154764_WNT7A,56456			0.0318905	0.330488	Diagnosis	Immature
chr3:13839400-13840234		ENSG00000154764_WNT7A,39837			0.598693	0.70125	Diagnosis	Immature
chr3:13867436-13868376		ENSG00000154764_WNT7A,11695			0.0906597	0.392816	Diagnosis	Immature
chr3:13872219-13873104		ENSG00000154764_WNT7A,6967			0.499822	0.622936	Diagnosis	Immature
chr3:13874605-13875519		ENSG00000154764_WNT7A,4552			0.373711	0.540137	Diagnosis	Immature
chr3:13880031-13880751	ENSG00000154764_WNT7A,0	ENSG00000154764_WNT7A,0			0.417649	0.566541	Diagnosis	Immature
chr3:24145834-24146750		ENSG00000151090_THRB,349006			0.171638	0.43597	Diagnosis	Immature
chr3:24185617-24186547		ENSG00000151090_THRB,309209			0.500157	0.623199	Diagnosis	Immature
chr3:24212576-24213495		ENSG00000151090_THRB,282261			0.371769	0.539021	Diagnosis	Immature
chr3:24220657-24221523		ENSG00000151090_THRB,274233			0.164594	0.432868	Diagnosis	Immature
chr3:24237765-24238668		ENSG00000151090_THRB,257088			0.140957	0.421311	Diagnosis	Immature
chr3:24241848-24242773		ENSG00000151090_THRB,252983			0.644919	0.740525	Diagnosis	Immature
chr3:24257596-24258417		ENSG00000151090_THRB,237339			0.826821	0.883584	Diagnosis	Immature
chr3:24258833-24259648		ENSG00000151090_THRB,236108			0.080007	0.385489	Diagnosis	Immature
chr3:24264546-24265410		ENSG00000151090_THRB,230346			0.598056	0.700703	Diagnosis	Immature
chr3:24287616-24288390		ENSG00000151090_THRB,207366			0.458914	0.593627	Diagnosis	Immature
chr3:24288590-24289413		ENSG00000151090_THRB,206343			0.0401609	0.342585	Diagnosis	Immature
chr3:24305896-24306837		ENSG00000151090_THRB,188919			0.254489	0.476412	Diagnosis	Immature
chr3:24335844-24336766		ENSG00000151090_THRB,158990			0.986733	0.99198	Diagnosis	Immature
chr3:24351805-24352576		ENSG00000151090_THRB,143180			0.529075	0.645572	Diagnosis	Immature
chr3:24362937-24363823		ENSG00000151090_THRB,131933			0.453192	0.589578	Diagnosis	Immature
chr3:24364853-24365753		ENSG00000151090_THRB,130003			0.218452	0.45852	Diagnosis	Immature
chr3:24494625-24495450	ENSG00000151090_THRB,306;ENSG00000228791_THRB-AS1,538	ENSG00000151090_THRB,306;ENSG00000228791_THRB-AS1,538			0.127161	0.41378	Diagnosis	Immature
chr3:24496476-24497172	ENSG00000151090_THRB,-720	ENSG00000228791_THRB-AS1,2389;ENSG00000272554_AC012087.2,2408			0.270604	0.484624	Diagnosis	Immature
chr3:27721461-27722405	ENSG00000163508_EOMES,306	ENSG00000163508_EOMES,306			0.86233	0.909257	Diagnosis	Immature
chr3:30606289-30607077	ENSG00000163513_TGFBR2,0	ENSG00000163513_TGFBR2,0			0.104663	0.400934	Diagnosis	Immature
chr3:30646242-30647090		ENSG00000163513_TGFBR2,39740			0.41765	0.566541	Diagnosis	Immature
chr3:30655135-30656073		ENSG00000163513_TGFBR2,48633			0.852386	0.902043	Diagnosis	Immature
chr3:30680535-30681412		ENSG00000163513_TGFBR2,74033			0.101875	0.39923	Diagnosis	Immature
chr3:30681809-30682528		ENSG00000163513_TGFBR2,75307			0.319458	0.510554	Diagnosis	Immature
chr3:30689014-30689877		ENSG00000163513_TGFBR2,82512			0.205027	0.45209	Diagnosis	Immature
chr3:30693241-30694116		ENSG00000163513_TGFBR2,86739			0.0221326	0.3052	Diagnosis	Immature
chr3:38136779-38137682	ENSG00000172936_MYD88,-796;ENSG00000060971_ACAA1,0	ENSG00000060971_ACAA1,0			0.0185086	0.293663	Diagnosis	Immature
chr3:38138392-38139197	ENSG00000060971_ACAA1,-1150;ENSG00000172936_MYD88,0	ENSG00000172936_MYD88,0			0.136913	0.418886	Diagnosis	Immature
chr3:41198928-41199855		ENSG00000168036_CTNNB1,4187			0.000931927	0.176098	Diagnosis	Immature
chr3:41202650-41203492		ENSG00000168036_CTNNB1,7909			0.798457	0.862814	Diagnosis	Immature
chr3:49377985-49378875		ENSG00000067560_RHOA,34123			0.658232	0.751924	Diagnosis	Immature
chr3:49411717-49412585	ENSG00000145022_TCTA,0;ENSG00000067560_RHOA,413	ENSG00000145022_TCTA,0;ENSG00000067560_RHOA,413			0.00177369	0.184273	Diagnosis	Immature
chr3:51706540-51707429	ENSG00000164082_GRM2,0	ENSG00000164082_GRM2,0			0.27153	0.485033	Diagnosis	Immature
chr3:51710565-51711368		ENSG00000164082_GRM2,3497			0.870855	0.915146	Diagnosis	Immature
chr3:53347146-53348071	ENSG00000272886_DCP1A,0	ENSG00000272886_DCP1A,0;ENSG00000157388_CACNA1D,18183			0.000587107	0.171004	Diagnosis	Immature
chr3:53374724-53375622		ENSG00000157388_CACNA1D,45761			0.288566	0.494244	Diagnosis	Immature
chr3:53482025-53482945		ENSG00000157388_CACNA1D,153062			0.432456	0.575786	Diagnosis	Immature
chr3:53494022-53494853		ENSG00000157388_CACNA1D,165059			0.0195412	0.297596	Diagnosis	Immature
chr3:53495464-53496309		ENSG00000157388_CACNA1D,166501			0.488502	0.614848	Diagnosis	Immature
chr3:53502596-53503426		ENSG00000157388_CACNA1D,173633			0.480998	0.60914	Diagnosis	Immature
chr3:53516097-53516996		ENSG00000157388_CACNA1D,187134			0.273939	0.486283	Diagnosis	Immature
chr3:53518001-53518827		ENSG00000157388_CACNA1D,189038			0.259907	0.479192	Diagnosis	Immature
chr3:53534162-53534751		ENSG00000157388_CACNA1D,205199			0.0629191	0.369217	Diagnosis	Immature
chr3:53534863-53535468		ENSG00000157388_CACNA1D,205900			0.302261	0.501304	Diagnosis	Immature
chr3:53545562-53546440		ENSG00000157388_CACNA1D,216599			0.164635	0.432868	Diagnosis	Immature
chr3:53597136-53597977		ENSG00000157388_CACNA1D,268173			0.865789	0.911579	Diagnosis	Immature
chr3:53614071-53614959		ENSG00000157388_CACNA1D,285108			0.108291	0.403207	Diagnosis	Immature
chr3:53616060-53616972		ENSG00000157388_CACNA1D,287097			0.333261	0.518101	Diagnosis	Immature
chr3:53675668-53676506		ENSG00000157388_CACNA1D,346705			0.0787272	0.384724	Diagnosis	Immature
chr3:53679801-53680701		ENSG00000157388_CACNA1D,350838			0.450736	0.587849	Diagnosis	Immature
chr3:53709855-53710686		ENSG00000157388_CACNA1D,380892			0.296499	0.498496	Diagnosis	Immature
chr3:53721066-53721940		ENSG00000157388_CACNA1D,392103			0.554362	0.665302	Diagnosis	Immature
chr3:53730262-53731180		ENSG00000157388_CACNA1D,401299			0.236865	0.467566	Diagnosis	Immature
chr3:53739616-53740452		ENSG00000157388_CACNA1D,410653			0.696799	0.783808	Diagnosis	Immature
chr3:53748518-53749413		ENSG00000157388_CACNA1D,419555			0.099474	0.397483	Diagnosis	Immature
chr3:53754035-53754876		ENSG00000157388_CACNA1D,425072			0.893544	0.930796	Diagnosis	Immature
chr3:53772698-53773309		ENSG00000157388_CACNA1D,443735			0.163826	0.432373	Diagnosis	Immature
chr3:53773471-53774300		ENSG00000157388_CACNA1D,444508			0.0794219	0.385033	Diagnosis	Immature
chr3:53780671-53781500		ENSG00000157388_CACNA1D,451708			0.0994469	0.397464	Diagnosis	Immature
chr3:53795877-53796739	ENSG00000271916_AC012467.1,1280	ENSG00000157388_CACNA1D,466914			0.0401143	0.342585	Diagnosis	Immature
chr3:53806326-53807052		ENSG00000157388_CACNA1D,477363			0.146359	0.424295	Diagnosis	Immature
chr3:53807179-53807752		ENSG00000157388_CACNA1D,478216			0.806987	0.868961	Diagnosis	Immature
chr3:53809644-53810397		ENSG00000157388_CACNA1D,480681			0.203606	0.451446	Diagnosis	Immature
chr3:114144689-114145588		ENSG00000151577_DRD3,53819			0.447988	0.586102	Diagnosis	Immature
chr3:114152309-114153232		ENSG00000151577_DRD3,46175			0.0876334	0.390704	Diagnosis	Immature
chr3:119829095-119830043		ENSG00000082701_GSK3B,264374			0.46936	0.600625	Diagnosis	Immature
chr3:119891740-119892635		ENSG00000082701_GSK3B,201782			0.316734	0.509078	Diagnosis	Immature
chr3:120094481-120095269	ENSG00000082701_GSK3B,-64;ENSG00000242622_AC092910.3,0	ENSG00000242622_AC092910.3,0			0.00387487	0.210077	Diagnosis	Immature
chr3:134598740-134599604	ENSG00000154928_EPHB1,939	ENSG00000154928_EPHB1,939			0.297742	0.499055	Diagnosis	Immature
chr3:134600570-134601450		ENSG00000154928_EPHB1,2769;ENSG00000174611_KY,50186			0.0555237	0.361963	Diagnosis	Immature
chr3:134601831-134602767		ENSG00000154928_EPHB1,4030;ENSG00000174611_KY,48869			0.431258	0.575073	Diagnosis	Immature
chr3:134644651-134645538		ENSG00000174611_KY,6098;ENSG00000154928_EPHB1,46850			0.738775	0.817423	Diagnosis	Immature
chr3:134650635-134651522	ENSG00000174611_KY,114	ENSG00000174611_KY,114;ENSG00000154928_EPHB1,52834			0.358563	0.53176	Diagnosis	Immature
chr3:134658317-134659200		ENSG00000154928_EPHB1,60516			0.042153	0.344575	Diagnosis	Immature
chr3:134663461-134664347		ENSG00000154928_EPHB1,65660			0.164022	0.432498	Diagnosis	Immature
chr3:134681135-134682003		ENSG00000154928_EPHB1,83334			0.0857071	0.389237	Diagnosis	Immature
chr3:134694098-134694963		ENSG00000154928_EPHB1,96297			0.366542	0.535959	Diagnosis	Immature
chr3:134697956-134698822		ENSG00000154928_EPHB1,100155			0.42476	0.570925	Diagnosis	Immature
chr3:134709702-134710592		ENSG00000154928_EPHB1,111901			0.102963	0.399769	Diagnosis	Immature
chr3:134794776-134795633	ENSG00000286982_AC016931.1,860	ENSG00000286982_AC016931.1,860;ENSG00000154928_EPHB1,196975			0.0960681	0.395509	Diagnosis	Immature
chr3:134796159-134797069	ENSG00000286982_AC016931.1,0	ENSG00000286982_AC016931.1,0;ENSG00000154928_EPHB1,198358			0.825148	0.882408	Diagnosis	Immature
chr3:134799180-134800062		ENSG00000154928_EPHB1,201379			0.749804	0.825923	Diagnosis	Immature
chr3:134852639-134853505		ENSG00000154928_EPHB1,254838			0.411721	0.562806	Diagnosis	Immature
chr3:134864404-134865186		ENSG00000154928_EPHB1,266603			0.302622	0.501476	Diagnosis	Immature
chr3:134874538-134875424		ENSG00000154928_EPHB1,276737			0.301157	0.500704	Diagnosis	Immature
chr3:134879919-134880669		ENSG00000154928_EPHB1,282118			0.2489	0.473484	Diagnosis	Immature
chr3:134880823-134881627		ENSG00000154928_EPHB1,283022			0.3226	0.512369	Diagnosis	Immature
chr3:134904100-134904815		ENSG00000154928_EPHB1,306299			0.198319	0.448454	Diagnosis	Immature
chr3:134937259-134938095		ENSG00000154928_EPHB1,339458			0.402893	0.557796	Diagnosis	Immature
chr3:134952120-134952999		ENSG00000154928_EPHB1,354319			0.46823	0.599838	Diagnosis	Immature
chr3:134953227-134954158		ENSG00000154928_EPHB1,355426			0.0459047	0.350357	Diagnosis	Immature
chr3:134965584-134966499		ENSG00000154928_EPHB1,367783			0.336998	0.520113	Diagnosis	Immature
chr3:134971102-134972028		ENSG00000154928_EPHB1,373301			0.12518	0.412883	Diagnosis	Immature
chr3:134988459-134989381		ENSG00000154928_EPHB1,390658			0.0184654	0.293446	Diagnosis	Immature
chr3:134992809-134993583		ENSG00000154928_EPHB1,395008			0.499304	0.62249	Diagnosis	Immature
chr3:135011897-135012809		ENSG00000154928_EPHB1,414096			0.975908	0.985016	Diagnosis	Immature
chr3:135056459-135057223		ENSG00000154928_EPHB1,458658			0.164672	0.432868	Diagnosis	Immature
chr3:135057773-135058617		ENSG00000154928_EPHB1,459972			0.510709	0.631491	Diagnosis	Immature
chr3:135081506-135082364		ENSG00000154928_EPHB1,483705			0.963464	0.977091	Diagnosis	Immature
chr3:135109329-135110168		ENSG00000154928_EPHB1,511528			0.418843	0.567381	Diagnosis	Immature
chr3:135134098-135135027		ENSG00000154928_EPHB1,536297			0.830899	0.886466	Diagnosis	Immature
chr3:135140888-135141807		ENSG00000240086_AC092969.1,298081;ENSG00000154928_EPHB1,543087			0.190639	0.444618	Diagnosis	Immature
chr3:135147225-135148024		ENSG00000240086_AC092969.1,291864;ENSG00000154928_EPHB1,549424			0.237331	0.467874	Diagnosis	Immature
chr3:135148289-135149182		ENSG00000240086_AC092969.1,290706;ENSG00000154928_EPHB1,550488			0.60263	0.704635	Diagnosis	Immature
chr3:135166106-135166953		ENSG00000240086_AC092969.1,272935;ENSG00000154928_EPHB1,568305			0.950656	0.968515	Diagnosis	Immature
chr3:135167794-135168684		ENSG00000240086_AC092969.1,271204;ENSG00000154928_EPHB1,569993			0.139731	0.420585	Diagnosis	Immature
chr3:135175674-135176533		ENSG00000240086_AC092969.1,263355;ENSG00000154928_EPHB1,577873			0.018167	0.292669	Diagnosis	Immature
chr3:135192666-135193546		ENSG00000240086_AC092969.1,246342;ENSG00000154928_EPHB1,594865			0.0292125	0.325178	Diagnosis	Immature
chr3:135238212-135239078		ENSG00000240086_AC092969.1,200810;ENSG00000154928_EPHB1,640411			0.192502	0.445463	Diagnosis	Immature
chr3:148697595-148698445	ENSG00000144891_AGTR1,0	ENSG00000144891_AGTR1,0			0.0889502	0.391455	Diagnosis	Immature
chr3:148727051-148727934		ENSG00000144891_AGTR1,29267			0.0928427	0.39398	Diagnosis	Immature
chr3:172444798-172445623		ENSG00000121853_GHSR,2833			0.0218954	0.304257	Diagnosis	Immature
chr3:181709257-181710068	ENSG00000181449_SOX2,-1857	ENSG00000242808_SOX2-OT,719495			0.248453	0.473382	Diagnosis	Immature
chr3:181710360-181711161	ENSG00000181449_SOX2,-764	ENSG00000242808_SOX2-OT,720598			0.146519	0.4244	Diagnosis	Immature
chr3:181711337-181712181	ENSG00000181449_SOX2,0	ENSG00000181449_SOX2,0;ENSG00000242808_SOX2-OT,721575			0.11554	0.407673	Diagnosis	Immature
chr3:181712734-181713529	ENSG00000181449_SOX2,809	ENSG00000181449_SOX2,809;ENSG00000242808_SOX2-OT,722972			0.067844	0.375143	Diagnosis	Immature
chr3:184561159-184562071	ENSG00000182580_EPHB3,0	ENSG00000182580_EPHB3,0			0.00459787	0.216661	Diagnosis	Immature
chr3:184568692-184569587		ENSG00000182580_EPHB3,6907			0.581686	0.687083	Diagnosis	Immature
chr4:1792771-1793686	ENSG00000068078_FGFR3,0	ENSG00000068078_FGFR3,0			0.640497	0.736768	Diagnosis	Immature
chr4:1797472-1798333		ENSG00000068078_FGFR3,4179			0.158176	0.429833	Diagnosis	Immature
chr4:3041356-3042248	ENSG00000197386_HTT,0	ENSG00000197386_HTT,0			0.12211	0.411032	Diagnosis	Immature
chr4:3045185-3046031		ENSG00000197386_HTT,3763			0.264987	0.481662	Diagnosis	Immature
chr4:3047250-3048088		ENSG00000197386_HTT,5828			0.208958	0.453915	Diagnosis	Immature
chr4:3058662-3059605		ENSG00000251075_HTT-AS,14933;ENSG00000197386_HTT,17240			0.220514	0.459741	Diagnosis	Immature
chr4:3067264-3068059		ENSG00000251075_HTT-AS,6479;ENSG00000197386_HTT,25842			0.858441	0.906429	Diagnosis	Immature
chr4:3073905-3074807	ENSG00000251075_HTT-AS,0	ENSG00000251075_HTT-AS,0;ENSG00000197386_HTT,32483			0.00267499	0.196147	Diagnosis	Immature
chr4:3106325-3107196		ENSG00000197386_HTT,64903			0.0628661	0.369172	Diagnosis	Immature
chr4:3121781-3122538		ENSG00000197386_HTT,80359			0.726401	0.807609	Diagnosis	Immature
chr4:3166260-3167165		ENSG00000197386_HTT,124838			0.200825	0.449668	Diagnosis	Immature
chr4:3172815-3173624		ENSG00000197386_HTT,131393			0.13227	0.416595	Diagnosis	Immature
chr4:3176290-3177137		ENSG00000197386_HTT,134868			0.0753437	0.381999	Diagnosis	Immature
chr4:3186342-3187237		ENSG00000197386_HTT,144920			0.228383	0.46313	Diagnosis	Immature
chr4:3190310-3191171		ENSG00000197386_HTT,148888			0.198421	0.448454	Diagnosis	Immature
chr4:3226308-3227136		ENSG00000197386_HTT,184886			0.477108	0.606134	Diagnosis	Immature
chr4:3227930-3228700		ENSG00000197386_HTT,186508			0.948309	0.966993	Diagnosis	Immature
chr4:3237409-3238257		ENSG00000197386_HTT,195987			0.299207	0.499767	Diagnosis	Immature
chr4:3765503-3766308	ENSG00000184160_ADRA2C,-40				0.0972512	0.396252	Diagnosis	Immature
chr4:15962901-15963754		ENSG00000137441_FGFBP2,5555;ENSG00000007062_PROM1,120624			0.0264397	0.317705	Diagnosis	Immature
chr4:15976596-15977494		ENSG00000007062_PROM1,106884			0.340169	0.522111	Diagnosis	Immature
chr4:15989005-15989813		ENSG00000007062_PROM1,94565			0.0512039	0.357151	Diagnosis	Immature
chr4:15990383-15991274		ENSG00000007062_PROM1,93104			0.0821979	0.386923	Diagnosis	Immature
chr4:16001105-16001969		ENSG00000007062_PROM1,82409			0.303428	0.501877	Diagnosis	Immature
chr4:16025867-16026727		ENSG00000007062_PROM1,57651			0.133529	0.417178	Diagnosis	Immature
chr4:16051757-16052640		ENSG00000007062_PROM1,31738			0.1465	0.424391	Diagnosis	Immature
chr4:16056563-16057422		ENSG00000007062_PROM1,26956			0.053195	0.359637	Diagnosis	Immature
chr4:16067216-16068116		ENSG00000007062_PROM1,16262			0.0799537	0.385411	Diagnosis	Immature
chr4:16082307-16083218	ENSG00000007062_PROM1,1160	ENSG00000007062_PROM1,1160			0.250638	0.474321	Diagnosis	Immature
chr4:16083486-16084296	ENSG00000007062_PROM1,82	ENSG00000007062_PROM1,82			0.385184	0.546693	Diagnosis	Immature
chr4:26171636-26172508		ENSG00000168214_RBPJ,8181			0.124319	0.412446	Diagnosis	Immature
chr4:26193325-26194215		ENSG00000168214_RBPJ,29870			0.442517	0.582346	Diagnosis	Immature
chr4:26204609-26205556		ENSG00000168214_RBPJ,41154			0.847827	0.898751	Diagnosis	Immature
chr4:26208019-26208943		ENSG00000168214_RBPJ,44564			0.335599	0.519354	Diagnosis	Immature
chr4:26217932-26218852		ENSG00000168214_RBPJ,54477			0.239647	0.469054	Diagnosis	Immature
chr4:26235299-26236192		ENSG00000168214_RBPJ,71844			0.945895	0.96531	Diagnosis	Immature
chr4:26239217-26239631		ENSG00000168214_RBPJ,75762			0.055236	0.361684	Diagnosis	Immature
chr4:26273270-26274063		ENSG00000168214_RBPJ,109815			0.159807	0.430541	Diagnosis	Immature
chr4:26319149-26320027		ENSG00000168214_RBPJ,155694			0.00308732	0.200127	Diagnosis	Immature
chr4:26320550-26321359		ENSG00000168214_RBPJ,157095			0.0221402	0.3052	Diagnosis	Immature
chr4:26329937-26330823		ENSG00000168214_RBPJ,166482			0.340962	0.522601	Diagnosis	Immature
chr4:26331096-26332041		ENSG00000168214_RBPJ,167641			0.207848	0.453362	Diagnosis	Immature
chr4:26342671-26343544		ENSG00000168214_RBPJ,179216			0.199274	0.449029	Diagnosis	Immature
chr4:26369379-26370138		ENSG00000168214_RBPJ,205924			0.206892	0.452978	Diagnosis	Immature
chr4:26372364-26373235		ENSG00000168214_RBPJ,208909			0.0773894	0.383418	Diagnosis	Immature
chr4:26375365-26376174		ENSG00000168214_RBPJ,211910			0.086566	0.389739	Diagnosis	Immature
chr4:26377738-26378553		ENSG00000168214_RBPJ,214283			0.344185	0.524285	Diagnosis	Immature
chr4:26410457-26411341		ENSG00000168214_RBPJ,247002			0.150316	0.42622	Diagnosis	Immature
chr4:26412500-26413379		ENSG00000168214_RBPJ,249045			0.281502	0.490311	Diagnosis	Immature
chr4:47971942-47972793		ENSG00000198515_CNGA1,43879;ENSG00000163293_NIPAL1,57800			0.556821	0.667294	Diagnosis	Immature
chr4:48016264-48017107	ENSG00000198515_CNGA1,0	ENSG00000198515_CNGA1,0;ENSG00000163293_NIPAL1,102122			0.0530713	0.359486	Diagnosis	Immature
chr4:55086634-55087211		ENSG00000250646_AC111194.2,33574;ENSG00000128052_KDR,38384			0.325409	0.513997	Diagnosis	Immature
chr4:55087342-55088093		ENSG00000250646_AC111194.2,34282;ENSG00000128052_KDR,37502			0.00274188	0.196728	Diagnosis	Immature
chr4:55125119-55126038	ENSG00000128052_KDR,0	ENSG00000128052_KDR,0			0.0576038	0.364207	Diagnosis	Immature
chr4:56655384-56656155		ENSG00000171476_HOPX,25744			0.0246043	0.312518	Diagnosis	Immature
chr4:56677649-56678499		ENSG00000171476_HOPX,3400			0.356815	0.530726	Diagnosis	Immature
chr4:56681191-56681917	ENSG00000171476_HOPX,0	ENSG00000171476_HOPX,0			0.111479	0.405165	Diagnosis	Immature
chr4:56907477-56908288	ENSG00000084093_REST,0	ENSG00000084093_REST,0			0.179265	0.439687	Diagnosis	Immature
chr4:56908500-56909391	ENSG00000084093_REST,624	ENSG00000084093_REST,624			0.203876	0.4516	Diagnosis	Immature
chr4:56953613-56954530		ENSG00000084093_REST,45737			0.277366	0.488254	Diagnosis	Immature
chr4:56957826-56958687		ENSG00000084093_REST,49950			0.194651	0.446443	Diagnosis	Immature
chr4:65367200-65368045		ENSG00000145242_EPHA5,302450			0.414592	0.564756	Diagnosis	Immature
chr4:65384317-65385121		ENSG00000145242_EPHA5,285374			0.215325	0.457062	Diagnosis	Immature
chr4:65398846-65399675		ENSG00000145242_EPHA5,270820			0.144099	0.42339	Diagnosis	Immature
chr4:65403904-65404814		ENSG00000145242_EPHA5,265681			0.879452	0.921267	Diagnosis	Immature
chr4:65416637-65417528		ENSG00000145242_EPHA5,252967			0.294382	0.49738	Diagnosis	Immature
chr4:65521501-65522335		ENSG00000145242_EPHA5,148160			0.215421	0.457126	Diagnosis	Immature
chr4:65546697-65547581		ENSG00000145242_EPHA5,122914			0.264109	0.481289	Diagnosis	Immature
chr4:65667235-65667869		ENSG00000145242_EPHA5,2626			0.218374	0.458516	Diagnosis	Immature
chr4:65667997-65668866	ENSG00000250846_EPHA5-AS1,-1095;ENSG00000145242_EPHA5,1629	ENSG00000145242_EPHA5,1629			0.0185054	0.293654	Diagnosis	Immature
chr4:65670148-65671027	ENSG00000145242_EPHA5,0;ENSG00000250846_EPHA5-AS1,187	ENSG00000145242_EPHA5,0;ENSG00000250846_EPHA5-AS1,187			0.00827579	0.244261	Diagnosis	Immature
chr4:74758362-74759223		ENSG00000174808_BTC,35300			0.134389	0.417488	Diagnosis	Immature
chr4:74793871-74794766	ENSG00000174808_BTC,0	ENSG00000174808_BTC,0			0.128531	0.41451	Diagnosis	Immature
chr4:87973260-87974147	ENSG00000118785_SPP1,-1503				0.0771666	0.383174	Diagnosis	Immature
chr4:87975252-87976049	ENSG00000118785_SPP1,0	ENSG00000118785_SPP1,0;ENSG00000286618_AC131944.1,32428			0.503579	0.625756	Diagnosis	Immature
chr4:87977245-87978099	ENSG00000118785_SPP1,1595	ENSG00000118785_SPP1,1595;ENSG00000286618_AC131944.1,30378			0.177498	0.438363	Diagnosis	Immature
chr4:87978409-87979229		ENSG00000118785_SPP1,2759;ENSG00000286618_AC131944.1,29248			0.162058	0.431384	Diagnosis	Immature
chr4:89753005-89753740		ENSG00000277695_AC097478.3,5203;ENSG00000145335_SNCA,84575			0.0429027	0.345695	Diagnosis	Immature
chr4:89757209-89758041		ENSG00000145335_SNCA,80274			0.0847063	0.388611	Diagnosis	Immature
chr4:89762139-89762898		ENSG00000145335_SNCA,75417			0.158621	0.429952	Diagnosis	Immature
chr4:89765670-89766555		ENSG00000145335_SNCA,71760			0.0488155	0.354011	Diagnosis	Immature
chr4:89771083-89771899		ENSG00000145335_SNCA,66416			0.484998	0.612239	Diagnosis	Immature
chr4:89773641-89774517		ENSG00000145335_SNCA,63798			0.180552	0.440377	Diagnosis	Immature
chr4:89800403-89801309		ENSG00000145335_SNCA,37006			0.0526485	0.359048	Diagnosis	Immature
chr4:89829287-89830178		ENSG00000145335_SNCA,8137			0.12008	0.410131	Diagnosis	Immature
chr4:89836918-89837743	ENSG00000247775_SNCA-AS1,510;ENSG00000145335_SNCA,572	ENSG00000247775_SNCA-AS1,510;ENSG00000145335_SNCA,572			0.0610597	0.367467	Diagnosis	Immature
chr4:94757725-94758639	ENSG00000249599_BMPR1B-DT,-44;ENSG00000138696_BMPR1B,0	ENSG00000138696_BMPR1B,0			0.0446366	0.348578	Diagnosis	Immature
chr4:94801921-94802736		ENSG00000138696_BMPR1B,43966			0.164748	0.432894	Diagnosis	Immature
chr4:94974512-94975446		ENSG00000138696_BMPR1B,216557			0.0911843	0.392919	Diagnosis	Immature
chr4:94995594-94996398		ENSG00000138696_BMPR1B,237639			0.17783	0.438607	Diagnosis	Immature
chr4:95044131-95045051		ENSG00000138696_BMPR1B,286176			0.162671	0.431673	Diagnosis	Immature
chr4:95049622-95050438		ENSG00000138696_BMPR1B,291667			0.959077	0.974195	Diagnosis	Immature
chr4:95051125-95052047		ENSG00000138696_BMPR1B,293170			0.857488	0.905766	Diagnosis	Immature
chr4:95073345-95074042		ENSG00000138696_BMPR1B,315390			0.522639	0.640473	Diagnosis	Immature
chr4:95090994-95091901		ENSG00000138696_BMPR1B,333039			0.467125	0.599043	Diagnosis	Immature
chr4:95124739-95125579		ENSG00000138696_BMPR1B,366784			0.0245826	0.312491	Diagnosis	Immature
chr4:95129628-95130450		ENSG00000138696_BMPR1B,371673			0.404161	0.558463	Diagnosis	Immature
chr4:95155998-95156899		ENSG00000138696_BMPR1B,398043			0.367451	0.536491	Diagnosis	Immature
chr4:102501159-102502060	ENSG00000260651_AF213884.3,0;ENSG00000109320_NFKB1,0	ENSG00000260651_AF213884.3,0;ENSG00000109320_NFKB1,0			0.192034	0.445213	Diagnosis	Immature
chr4:102518335-102519138		ENSG00000109320_NFKB1,17004			0.223326	0.460996	Diagnosis	Immature
chr4:102523072-102524016		ENSG00000109320_NFKB1,21741			0.380102	0.54384	Diagnosis	Immature
chr4:102524546-102525381		ENSG00000109320_NFKB1,23215			0.359572	0.532301	Diagnosis	Immature
chr4:102541457-102542379		ENSG00000109320_NFKB1,40126			0.150892	0.42643	Diagnosis	Immature
chr4:102554288-102555181		ENSG00000109320_NFKB1,52957			0.329566	0.516109	Diagnosis	Immature
chr4:108059889-108060713		ENSG00000138795_LEF1,108243			0.580351	0.686003	Diagnosis	Immature
chr4:108168566-108169359	ENSG00000138795_LEF1,0;ENSG00000232021_LEF1-AS1,1041	ENSG00000138795_LEF1,0;ENSG00000232021_LEF1-AS1,1041			0.0781101	0.383981	Diagnosis	Immature
chr4:109702976-109703839	ENSG00000138794_CASP6,0	ENSG00000138794_CASP6,0			0.0281538	0.322696	Diagnosis	Immature
chr4:109912554-109913364	ENSG00000138798_EGF,0	ENSG00000138798_EGF,0			0.244693	0.471869	Diagnosis	Immature
chr4:109921196-109922084		ENSG00000138798_EGF,8313			0.584861	0.689821	Diagnosis	Immature
chr4:109977555-109978401		ENSG00000138798_EGF,64672			0.524739	0.64208	Diagnosis	Immature
chr4:109990398-109991324		ENSG00000138798_EGF,77515			0.114151	0.407008	Diagnosis	Immature
chr4:109998517-109999418		ENSG00000138798_EGF,85634			0.312265	0.506837	Diagnosis	Immature
chr4:110005233-110006136		ENSG00000138798_EGF,92350			0.327538	0.515052	Diagnosis	Immature
chr4:112516450-112517161	ENSG00000178403_NEUROG2,-270;ENSG00000249509_AC023886.1,1065	ENSG00000249509_AC023886.1,1065			0.30989	0.50559	Diagnosis	Immature
chr4:122826484-122827263	ENSG00000138685_FGF2,0	ENSG00000138685_FGF2,0			0.0408589	0.343002	Diagnosis	Immature
chr4:122854483-122855419		ENSG00000138685_FGF2,27775			0.324442	0.51346	Diagnosis	Immature
chr4:138175204-138176118		ENSG00000151012_SLC7A11,66231;ENSG00000250033_SLC7A11-AS1,117740			0.176763	0.438056	Diagnosis	Immature
chr4:138181006-138181933		ENSG00000151012_SLC7A11,60416			0.0766566	0.382691	Diagnosis	Immature
chr4:138182700-138183588		ENSG00000151012_SLC7A11,58761			0.229937	0.463944	Diagnosis	Immature
chr4:138185922-138186804		ENSG00000151012_SLC7A11,55545			0.92617	0.952128	Diagnosis	Immature
chr4:138190604-138191497		ENSG00000151012_SLC7A11,50852			0.370568	0.538349	Diagnosis	Immature
chr4:138199356-138200278		ENSG00000151012_SLC7A11,42071			0.415277	0.565171	Diagnosis	Immature
chr4:138217292-138218195		ENSG00000151012_SLC7A11,24154			0.496397	0.620331	Diagnosis	Immature
chr4:138221670-138222573		ENSG00000151012_SLC7A11,19776			0.0387214	0.341401	Diagnosis	Immature
chr4:138241947-138242731	ENSG00000151012_SLC7A11,0	ENSG00000151012_SLC7A11,0			0.171523	0.435868	Diagnosis	Immature
chr4:148082395-148083249		ENSG00000151623_NR3C2,361449			0.21733	0.458085	Diagnosis	Immature
chr4:148094089-148094883		ENSG00000151623_NR3C2,349815			0.178033	0.438806	Diagnosis	Immature
chr4:148095130-148095993		ENSG00000151623_NR3C2,348705			0.076142	0.382525	Diagnosis	Immature
chr4:148100568-148101384		ENSG00000151623_NR3C2,343314			0.516802	0.635898	Diagnosis	Immature
chr4:148112028-148112910		ENSG00000151623_NR3C2,331788			0.234125	0.466135	Diagnosis	Immature
chr4:148165945-148166807		ENSG00000250354_AC069272.1,19474;ENSG00000151623_NR3C2,277891			0.446805	0.585277	Diagnosis	Immature
chr4:148203120-148204018		ENSG00000250354_AC069272.1,56649;ENSG00000151623_NR3C2,240680			0.122128	0.411032	Diagnosis	Immature
chr4:148214534-148215278		ENSG00000151623_NR3C2,229420			0.153877	0.427798	Diagnosis	Immature
chr4:148235582-148236467		ENSG00000151623_NR3C2,208231			0.858549	0.906492	Diagnosis	Immature
chr4:148435540-148436434		ENSG00000151623_NR3C2,8264			0.210855	0.454796	Diagnosis	Immature
chr4:148442115-148442996	ENSG00000151623_NR3C2,1702	ENSG00000151623_NR3C2,1702			0.0250673	0.313771	Diagnosis	Immature
chr4:148445108-148445945	ENSG00000151623_NR3C2,-410;ENSG00000287292_AC002460.2,0	ENSG00000287292_AC002460.2,0			0.144652	0.423498	Diagnosis	Immature
chr4:153683984-153684704	ENSG00000137462_TLR2,0	ENSG00000137462_TLR2,0			0.0622085	0.369031	Diagnosis	Immature
chr4:155854359-155855268	ENSG00000151790_TDO2,0	ENSG00000151790_TDO2,0;ENSG00000256394_ASIC5,11009			0.904271	0.937685	Diagnosis	Immature
chr4:157217405-157218351		ENSG00000120251_GRIA2,13223			0.996671	0.997893	Diagnosis	Immature
chr4:157220101-157220979		ENSG00000120251_GRIA2,15919			0.0791149	0.384958	Diagnosis	Immature
chr4:157221886-157222831		ENSG00000120251_GRIA2,17704			0.00930965	0.25144	Diagnosis	Immature
chr4:157246950-157247901		ENSG00000120251_GRIA2,42768			0.313098	0.507328	Diagnosis	Immature
chr4:157290773-157291579		ENSG00000120251_GRIA2,86591			0.152289	0.427164	Diagnosis	Immature
chr4:157318708-157319621		ENSG00000120251_GRIA2,114526			0.194667	0.446443	Diagnosis	Immature
chr4:157345184-157346113		ENSG00000120251_GRIA2,141002			0.180983	0.440649	Diagnosis	Immature
chr4:157347759-157348621		ENSG00000120251_GRIA2,143577			0.515672	0.635054	Diagnosis	Immature
chr4:163330578-163331334		ENSG00000164128_NPY1R,13498			0.130305	0.415273	Diagnosis	Immature
chr4:163331614-163332299		ENSG00000164128_NPY1R,12533			0.160829	0.430778	Diagnosis	Immature
chr4:163332431-163333294		ENSG00000164128_NPY1R,11538			0.0202264	0.299313	Diagnosis	Immature
chr4:163343684-163344561	ENSG00000164129_NPY5R,0;ENSG00000164128_NPY1R,271	ENSG00000164129_NPY5R,0;ENSG00000164128_NPY1R,271			0.0145329	0.278224	Diagnosis	Immature
chr4:173334077-173334986	ENSG00000164104_HMGB2,0	ENSG00000164104_HMGB2,0			0.00901235	0.249934	Diagnosis	Immature
chr4:184649104-184649977	ENSG00000164305_CASP3,0;ENSG00000164306_PRIMPOL,0	ENSG00000164305_CASP3,0;ENSG00000164306_PRIMPOL,0			0.00782618	0.242134	Diagnosis	Immature
chr4:186067813-186068618	ENSG00000164342_TLR3,-534				0.203489	0.451329	Diagnosis	Immature
chr4:186068824-186069561	ENSG00000164342_TLR3,0	ENSG00000164342_TLR3,0			0.805034	0.86759	Diagnosis	Immature
chr4:186072111-186073057		ENSG00000164342_TLR3,2959			0.147887	0.425173	Diagnosis	Immature
chr4:186073993-186074885		ENSG00000164342_TLR3,4841			0.0952938	0.39492	Diagnosis	Immature
chr5:35087616-35088489		ENSG00000113494_PRLR,141998			0.278611	0.489047	Diagnosis	Immature
chr5:35089424-35090290		ENSG00000113494_PRLR,140197			0.241993	0.470416	Diagnosis	Immature
chr5:35095923-35096841		ENSG00000113494_PRLR,133646			0.331479	0.51715	Diagnosis	Immature
chr5:35103489-35104342		ENSG00000113494_PRLR,126145			0.298483	0.499451	Diagnosis	Immature
chr5:35150919-35151837		ENSG00000113494_PRLR,78650			0.152041	0.427047	Diagnosis	Immature
chr5:35161348-35162246		ENSG00000113494_PRLR,68241			0.247288	0.472934	Diagnosis	Immature
chr5:35182933-35183757		ENSG00000113494_PRLR,46730			0.19852	0.448484	Diagnosis	Immature
chr5:35229914-35230760	ENSG00000113494_PRLR,0	ENSG00000113494_PRLR,0			0.136758	0.418822	Diagnosis	Immature
chr5:36606229-36607048	ENSG00000079215_SLC1A3,0	ENSG00000079215_SLC1A3,0			0.0229741	0.308238	Diagnosis	Immature
chr5:36607934-36608679	ENSG00000079215_SLC1A3,1579	ENSG00000079215_SLC1A3,1579			0.257856	0.478175	Diagnosis	Immature
chr5:36611449-36612313		ENSG00000079215_SLC1A3,5094			0.630196	0.727622	Diagnosis	Immature
chr5:36614297-36615159		ENSG00000079215_SLC1A3,7942			0.290037	0.49505	Diagnosis	Immature
chr5:36654926-36655732		ENSG00000079215_SLC1A3,48571			0.206928	0.452978	Diagnosis	Immature
chr5:36657409-36658286		ENSG00000079215_SLC1A3,51054			0.137469	0.419016	Diagnosis	Immature
chr5:36662011-36662945		ENSG00000079215_SLC1A3,55656			0.0594027	0.365936	Diagnosis	Immature
chr5:36664599-36665520		ENSG00000079215_SLC1A3,58244			0.32071	0.511279	Diagnosis	Immature
chr5:36665845-36666682		ENSG00000250155_AC008957.1,58513;ENSG00000079215_SLC1A3,59490			0.396706	0.553536	Diagnosis	Immature
chr5:36668672-36669561		ENSG00000250155_AC008957.1,55634;ENSG00000079215_SLC1A3,62317			0.0235041	0.30935	Diagnosis	Immature
chr5:36679817-36680689		ENSG00000250155_AC008957.1,44506;ENSG00000079215_SLC1A3,73462			0.199349	0.449033	Diagnosis	Immature
chr5:36683609-36684449		ENSG00000250155_AC008957.1,40746;ENSG00000079215_SLC1A3,77254			0.0124613	0.26846	Diagnosis	Immature
chr5:37816611-37817456		ENSG00000248587_GDNF-AS1,5022;ENSG00000168621_GDNF,22585			0.241372	0.470064	Diagnosis	Immature
chr5:37834218-37835116		ENSG00000168621_GDNF,4925;ENSG00000248587_GDNF-AS1,22629			0.106568	0.402033	Diagnosis	Immature
chr5:37837118-37837890		ENSG00000168621_GDNF,2151;ENSG00000248587_GDNF-AS1,25529			0.0408097	0.343002	Diagnosis	Immature
chr5:37839719-37840622	ENSG00000168621_GDNF,0	ENSG00000168621_GDNF,0;ENSG00000248587_GDNF-AS1,28130			0.567377	0.67557	Diagnosis	Immature
chr5:42423127-42424045	ENSG00000112964_GHR,0	ENSG00000112964_GHR,0			0.0102419	0.257819	Diagnosis	Immature
chr5:42424649-42425401	ENSG00000112964_GHR,1210	ENSG00000112964_GHR,1210			0.348941	0.526555	Diagnosis	Immature
chr5:42571109-42572060		ENSG00000112964_GHR,147670			0.704763	0.79027	Diagnosis	Immature
chr5:42583008-42583743		ENSG00000112964_GHR,159569			0.137745	0.419224	Diagnosis	Immature
chr5:42590644-42591568		ENSG00000112964_GHR,167205			0.153568	0.427631	Diagnosis	Immature
chr5:42612685-42613606		ENSG00000112964_GHR,189246			0.32299	0.512671	Diagnosis	Immature
chr5:42614331-42615187		ENSG00000112964_GHR,190892			0.20665	0.452868	Diagnosis	Immature
chr5:42620499-42621347		ENSG00000112964_GHR,197060			0.28674	0.493338	Diagnosis	Immature
chr5:42656335-42657230		ENSG00000112964_GHR,232896			0.647146	0.742407	Diagnosis	Immature
chr5:42691290-42692161		ENSG00000112964_GHR,267851			0.0945948	0.394757	Diagnosis	Immature
chr5:53478140-53479059	ENSG00000134363_FST,-1567				0.840553	0.89353	Diagnosis	Immature
chr5:53479645-53480318	ENSG00000134363_FST,-308				0.242831	0.470905	Diagnosis	Immature
chr5:53480440-53481032	ENSG00000134363_FST,0	ENSG00000134363_FST,0			0.238202	0.468266	Diagnosis	Immature
chr5:53481676-53482471	ENSG00000134363_FST,1050	ENSG00000134363_FST,1050			0.459758	0.5942	Diagnosis	Immature
chr5:53482761-53483521		ENSG00000134363_FST,2135			0.38769	0.548088	Diagnosis	Immature
chr5:63963929-63964527	ENSG00000178394_HTR1A,-1422	ENSG00000248285_AC122707.1,16516			0.336174	0.519701	Diagnosis	Immature
chr5:79464467-79465382		ENSG00000152413_HOMER1,48752			0.254392	0.476355	Diagnosis	Immature
chr5:79508101-79508958		ENSG00000152413_HOMER1,5176			0.794235	0.85984	Diagnosis	Immature
chr5:79513835-79514743	ENSG00000152413_HOMER1,0	ENSG00000152413_HOMER1,0			0.0128285	0.269794	Diagnosis	Immature
chr5:100900543-100901343	ENSG00000113532_ST8SIA4,1939	ENSG00000113532_ST8SIA4,1939			0.151219	0.426631	Diagnosis	Immature
chr5:100902877-100903780	ENSG00000113532_ST8SIA4,0	ENSG00000113532_ST8SIA4,0			0.0183789	0.29321	Diagnosis	Immature
chr5:100905072-100905946	ENSG00000113532_ST8SIA4,-1790				0.907867	0.940117	Diagnosis	Immature
chr5:112707117-112707975	ENSG00000134982_APC,0	ENSG00000134982_APC,0			0.0168975	0.288616	Diagnosis	Immature
chr5:112737452-112738283		ENSG00000134982_APC,29954			0.127983	0.414253	Diagnosis	Immature
chr5:112742256-112743156		ENSG00000134982_APC,34758			0.258714	0.478713	Diagnosis	Immature
chr5:112757277-112758160		ENSG00000134982_APC,49779			0.53792	0.652441	Diagnosis	Immature
chr5:112761919-112762787		ENSG00000134982_APC,54421			0.531942	0.647831	Diagnosis	Immature
chr5:112776033-112776908		ENSG00000134982_APC,68535			0.0426623	0.345101	Diagnosis	Immature
chr5:112800711-112801611		ENSG00000134982_APC,93213			0.463312	0.596563	Diagnosis	Immature
chr5:126776474-126777401	ENSG00000251072_LMNB1-DT,0;ENSG00000113368_LMNB1,0	ENSG00000251072_LMNB1-DT,0;ENSG00000113368_LMNB1,0			0.0980574	0.396814	Diagnosis	Immature
chr5:126777933-126778844	ENSG00000251072_LMNB1-DT,-1447;ENSG00000113368_LMNB1,1310	ENSG00000113368_LMNB1,1310			0.00379009	0.209409	Diagnosis	Immature
chr5:126779938-126780842		ENSG00000113368_LMNB1,3315			0.147238	0.424773	Diagnosis	Immature
chr5:126801678-126802454		ENSG00000113368_LMNB1,25055			0.386428	0.547315	Diagnosis	Immature
chr5:126804854-126805756		ENSG00000113368_LMNB1,28231			0.114787	0.407292	Diagnosis	Immature
chr5:126808417-126809187		ENSG00000113368_LMNB1,31794			0.906428	0.9391	Diagnosis	Immature
chr5:128083144-128083958	ENSG00000245937_LINC01184,0;ENSG00000064651_SLC12A2,0	ENSG00000245937_LINC01184,0;ENSG00000064651_SLC12A2,0			0.00376499	0.209409	Diagnosis	Immature
chr5:128100642-128101513		ENSG00000064651_SLC12A2,16876			0.147081	0.424611	Diagnosis	Immature
chr5:128106587-128107400		ENSG00000064651_SLC12A2,22821			0.500969	0.623776	Diagnosis	Immature
chr5:128174643-128175503		ENSG00000064651_SLC12A2,90877			0.0862209	0.389548	Diagnosis	Immature
chr5:132737017-132737912	ENSG00000131437_KIF3A,0	ENSG00000131437_KIF3A,0			0.00111281	0.17692	Diagnosis	Immature
chr5:138463678-138464411	ENSG00000120738_EGR1,-1068				0.00171608	0.184273	Diagnosis	Immature
chr5:138464754-138465684	ENSG00000120738_EGR1,0	ENSG00000120738_EGR1,0			0.00499593	0.221118	Diagnosis	Immature
chr5:140341326-140342254		ENSG00000113070_HBEGF,4349			0.590269	0.694246	Diagnosis	Immature
chr5:140346149-140346963	ENSG00000113070_HBEGF,0	ENSG00000113070_HBEGF,0			0.0342109	0.33487	Diagnosis	Immature
chr5:142597753-142598554		ENSG00000113578_FGF1,99516;ENSG00000231185_SPRY4-AS1,272460			0.160986	0.430806	Diagnosis	Immature
chr5:142600397-142601181		ENSG00000113578_FGF1,96889;ENSG00000231185_SPRY4-AS1,275104			0.534615	0.649932	Diagnosis	Immature
chr5:142610793-142611674		ENSG00000113578_FGF1,86396;ENSG00000231185_SPRY4-AS1,285500			0.195903	0.44726	Diagnosis	Immature
chr5:142627411-142628328		ENSG00000113578_FGF1,69742;ENSG00000231185_SPRY4-AS1,302118			0.376633	0.541771	Diagnosis	Immature
chr5:142642161-142643021		ENSG00000113578_FGF1,55049;ENSG00000231185_SPRY4-AS1,316868			0.430819	0.574854	Diagnosis	Immature
chr5:142644680-142645604		ENSG00000113578_FGF1,52466;ENSG00000231185_SPRY4-AS1,319387			0.0178556	0.292003	Diagnosis	Immature
chr5:142652359-142653149		ENSG00000113578_FGF1,44921;ENSG00000231185_SPRY4-AS1,327066			0.799464	0.863548	Diagnosis	Immature
chr5:142655408-142656311		ENSG00000113578_FGF1,41759;ENSG00000231185_SPRY4-AS1,330115			0.051875	0.358054	Diagnosis	Immature
chr5:142660194-142660993		ENSG00000113578_FGF1,37077;ENSG00000231185_SPRY4-AS1,334901			0.475016	0.604778	Diagnosis	Immature
chr5:142669336-142670281		ENSG00000113578_FGF1,27789;ENSG00000231185_SPRY4-AS1,344043			0.43672	0.578629	Diagnosis	Immature
chr5:142674347-142675197		ENSG00000113578_FGF1,22873			0.913388	0.943714	Diagnosis	Immature
chr5:142676938-142677769		ENSG00000113578_FGF1,20301			0.194284	0.44635	Diagnosis	Immature
chr5:142678461-142679336		ENSG00000113578_FGF1,18734			0.223118	0.460923	Diagnosis	Immature
chr5:142684416-142685339		ENSG00000113578_FGF1,12731			0.0211125	0.30192	Diagnosis	Immature
chr5:142685878-142686688		ENSG00000113578_FGF1,11382			0.935395	0.958303	Diagnosis	Immature
chr5:142697273-142698193	ENSG00000113578_FGF1,0	ENSG00000113578_FGF1,0			0.137674	0.419177	Diagnosis	Immature
chr5:142698781-142699678	ENSG00000113578_FGF1,-711				0.116562	0.408104	Diagnosis	Immature
chr5:143319320-143320223		ENSG00000113580_NR3C1,115289			0.34608	0.52509	Diagnosis	Immature
chr5:143350713-143351553		ENSG00000113580_NR3C1,83959			0.394551	0.552353	Diagnosis	Immature
chr5:143403423-143404278		ENSG00000113580_NR3C1,31234			0.0713463	0.378657	Diagnosis	Immature
chr5:143404976-143405857		ENSG00000113580_NR3C1,29655			0.0944205	0.394757	Diagnosis	Immature
chr5:143434839-143435704	ENSG00000113580_NR3C1,0	ENSG00000113580_NR3C1,0			0.247704	0.473183	Diagnosis	Immature
chr5:147395931-147396800		ENSG00000113657_DPYSL3,113268			0.28659	0.493301	Diagnosis	Immature
chr5:147403758-147404684	ENSG00000272239_AC011373.1,1998	ENSG00000113657_DPYSL3,105384			0.192136	0.445221	Diagnosis	Immature
chr5:147436866-147437753		ENSG00000113657_DPYSL3,72315			0.423864	0.570453	Diagnosis	Immature
chr5:147445878-147446673		ENSG00000113657_DPYSL3,63395			0.310965	0.506205	Diagnosis	Immature
chr5:147453592-147454391		ENSG00000113657_DPYSL3,55677			0.14669	0.424409	Diagnosis	Immature
chr5:147455927-147456843		ENSG00000113657_DPYSL3,53225			0.373517	0.540083	Diagnosis	Immature
chr5:147483792-147484721		ENSG00000113657_DPYSL3,25347			0.0298976	0.325927	Diagnosis	Immature
chr5:147509566-147510403	ENSG00000113657_DPYSL3,0	ENSG00000113657_DPYSL3,0			0.115548	0.407677	Diagnosis	Immature
chr5:150218953-150219687		ENSG00000011083_SLC6A7,28891;ENSG00000070808_CAMK2A,70604			0.601734	0.703876	Diagnosis	Immature
chr5:150230436-150231331		ENSG00000070808_CAMK2A,58960			0.116763	0.408185	Diagnosis	Immature
chr5:150257942-150258715		ENSG00000070808_CAMK2A,31576			0.235959	0.466939	Diagnosis	Immature
chr5:150272423-150273253		ENSG00000070808_CAMK2A,17038			0.076418	0.382545	Diagnosis	Immature
chr5:150289556-150290459	ENSG00000070808_CAMK2A,0	ENSG00000070808_CAMK2A,0			0.00183583	0.184273	Diagnosis	Immature
chr5:151663443-151664361		ENSG00000113140_SPARC,22614			0.0505818	0.356483	Diagnosis	Immature
chr5:151680770-151681666		ENSG00000249035_CLMAT3,3825;ENSG00000113140_SPARC,5309			0.989284	0.993525	Diagnosis	Immature
chr5:151682889-151683696		ENSG00000113140_SPARC,3279;ENSG00000249035_CLMAT3,5944			0.391599	0.550713	Diagnosis	Immature
chr5:151686528-151687455	ENSG00000113140_SPARC,0	ENSG00000113140_SPARC,0;ENSG00000249035_CLMAT3,9583			0.285352	0.492525	Diagnosis	Immature
chr5:153490079-153490926	ENSG00000155511_GRIA1,464	ENSG00000155511_GRIA1,464			0.394816	0.552481	Diagnosis	Immature
chr5:153496511-153497342		ENSG00000155511_GRIA1,6896			0.157235	0.429233	Diagnosis	Immature
chr5:153499462-153500376		ENSG00000155511_GRIA1,9847			0.939092	0.960691	Diagnosis	Immature
chr5:153504472-153505357		ENSG00000155511_GRIA1,14857			0.429579	0.57404	Diagnosis	Immature
chr5:153511345-153512204		ENSG00000155511_GRIA1,21730			0.233443	0.465995	Diagnosis	Immature
chr5:153512975-153513833		ENSG00000155511_GRIA1,23360			0.231399	0.464756	Diagnosis	Immature
chr5:153516396-153517257		ENSG00000155511_GRIA1,26781			0.815065	0.874945	Diagnosis	Immature
chr5:153536969-153537854		ENSG00000155511_GRIA1,47354			0.429779	0.574197	Diagnosis	Immature
chr5:153539617-153540548		ENSG00000155511_GRIA1,50002			0.383132	0.54563	Diagnosis	Immature
chr5:153551484-153552387		ENSG00000155511_GRIA1,61869			0.965179	0.978188	Diagnosis	Immature
chr5:153558719-153559634		ENSG00000155511_GRIA1,69104			0.125703	0.41305	Diagnosis	Immature
chr5:153572419-153573271		ENSG00000155511_GRIA1,82804			0.886651	0.926144	Diagnosis	Immature
chr5:153595980-153596642		ENSG00000155511_GRIA1,106365			0.412806	0.563594	Diagnosis	Immature
chr5:153605007-153605895		ENSG00000155511_GRIA1,115392			0.292485	0.496312	Diagnosis	Immature
chr5:153628781-153629657		ENSG00000155511_GRIA1,139166			0.0900931	0.392228	Diagnosis	Immature
chr5:153641126-153641974		ENSG00000155511_GRIA1,151511			0.851284	0.901246	Diagnosis	Immature
chr5:153707468-153708404		ENSG00000155511_GRIA1,217853			0.122362	0.411211	Diagnosis	Immature
chr5:153714815-153715594		ENSG00000155511_GRIA1,225200			0.76886	0.840417	Diagnosis	Immature
chr5:153745958-153746757		ENSG00000155511_GRIA1,256343			0.156036	0.428758	Diagnosis	Immature
chr5:153797263-153798037		ENSG00000155511_GRIA1,307648			0.0115157	0.264205	Diagnosis	Immature
chr5:159877790-159878579		ENSG00000170214_ADRA1B,12710;ENSG00000253311_LINC01847,59187			0.197679	0.448227	Diagnosis	Immature
chr5:159878849-159879739		ENSG00000170214_ADRA1B,13769;ENSG00000253311_LINC01847,58027			0.139156	0.420229	Diagnosis	Immature
chr5:159884509-159885407		ENSG00000170214_ADRA1B,19429;ENSG00000253311_LINC01847,52359			0.342605	0.523372	Diagnosis	Immature
chr5:159897655-159898532		ENSG00000170214_ADRA1B,32575;ENSG00000253311_LINC01847,39234			0.153835	0.427748	Diagnosis	Immature
chr5:159902546-159903415		ENSG00000253311_LINC01847,34351;ENSG00000170214_ADRA1B,37466			0.0406333	0.343002	Diagnosis	Immature
chr5:159916019-159916929		ENSG00000253311_LINC01847,20837;ENSG00000170214_ADRA1B,50939			0.193934	0.446136	Diagnosis	Immature
chr5:159928194-159929020		ENSG00000253311_LINC01847,8746;ENSG00000170214_ADRA1B,63114			0.157857	0.429816	Diagnosis	Immature
chr5:159971718-159972571		ENSG00000170214_ADRA1B,106638			0.143956	0.423315	Diagnosis	Immature
chr5:161846585-161847384	ENSG00000022355_GABRA1,0	ENSG00000022355_GABRA1,0			0.0455516	0.349444	Diagnosis	Immature
chr5:161847798-161848653	ENSG00000022355_GABRA1,735	ENSG00000022355_GABRA1,735			0.0373229	0.339773	Diagnosis	Immature
chr5:161850396-161850932		ENSG00000022355_GABRA1,3333			0.245702	0.472138	Diagnosis	Immature
chr5:161876125-161876890		ENSG00000022355_GABRA1,29062			0.0894633	0.391804	Diagnosis	Immature
chr5:177456074-177456818		ENSG00000131188_PRR7,9629;ENSG00000113758_DBN1,17583			0.0226729	0.307325	Diagnosis	Immature
chr5:177457346-177458229		ENSG00000113758_DBN1,16172			0.00443113	0.213788	Diagnosis	Immature
chr5:177459929-177460745		ENSG00000113758_DBN1,13656			0.0734675	0.380388	Diagnosis	Immature
chr5:177461843-177462734		ENSG00000113758_DBN1,11667			0.065772	0.373185	Diagnosis	Immature
chr5:177468794-177469704		ENSG00000113758_DBN1,4697			0.060783	0.367386	Diagnosis	Immature
chr5:177473218-177473955	ENSG00000113758_DBN1,446	ENSG00000113758_DBN1,446			0.350294	0.527305	Diagnosis	Immature
chr6:7542551-7543317	ENSG00000261189_AL031058.1,-1213;ENSG00000096696_DSP,934	ENSG00000096696_DSP,934			0.141586	0.421777	Diagnosis	Immature
chr6:7553416-7554260		ENSG00000096696_DSP,11799			0.570224	0.677921	Diagnosis	Immature
chr6:20401201-20402110	ENSG00000112242_E2F3,0	ENSG00000112242_E2F3,0			8.18227e-05	0.171004	Diagnosis	Immature
chr6:20403087-20403999	ENSG00000112242_E2F3,1208	ENSG00000112242_E2F3,1208			0.064559	0.371789	Diagnosis	Immature
chr6:20404510-20405121		ENSG00000112242_E2F3,2631			0.308489	0.504878	Diagnosis	Immature
chr6:20479284-20480195		ENSG00000112242_E2F3,77405			0.781782	0.850419	Diagnosis	Immature
chr6:20482658-20483486		ENSG00000112242_E2F3,80779			0.221102	0.459954	Diagnosis	Immature
chr6:20484053-20484915		ENSG00000112242_E2F3,82174			0.199058	0.448897	Diagnosis	Immature
chr6:21593286-21594114	ENSG00000124766_SOX4,0;ENSG00000283480_AL512380.2,1479	ENSG00000124766_SOX4,0;ENSG00000283480_AL512380.2,1479			0.0254583	0.315064	Diagnosis	Immature
chr6:21594434-21595167	ENSG00000283480_AL512380.2,426;ENSG00000124766_SOX4,683	ENSG00000283480_AL512380.2,426;ENSG00000124766_SOX4,683			0.390458	0.550026	Diagnosis	Immature
chr6:21596478-21597406	ENSG00000283480_AL512380.2,-885	ENSG00000124766_SOX4,2727			0.0578781	0.364514	Diagnosis	Immature
chr6:24774752-24775600	ENSG00000112312_GMNN,0	ENSG00000112312_GMNN,0			0.00221694	0.191381	Diagnosis	Immature
chr6:31575098-31575997	ENSG00000232810_TNF,0	ENSG00000232810_TNF,0			0.874655	0.917808	Diagnosis	Immature
chr6:32853552-32854381	ENSG00000168394_TAP1,0	ENSG00000168394_TAP1,0;ENSG00000240065_PSMB9,9416			0.0139336	0.275359	Diagnosis	Immature
chr6:36675877-36676744	ENSG00000281450_PANDAR,-751;ENSG00000124762_CDKN1A,0;ENSG00000285244_DINOL,1815	ENSG00000124762_CDKN1A,0			0.999851	0.999901	Diagnosis	Immature
chr6:36678270-36679107	ENSG00000285244_DINOL,0;ENSG00000124762_CDKN1A,1810	ENSG00000285244_DINOL,0;ENSG00000124762_CDKN1A,1810			0.00894022	0.24967	Diagnosis	Immature
chr6:36680065-36680957	ENSG00000285244_DINOL,-1506	ENSG00000124762_CDKN1A,3605			0.00441327	0.213543	Diagnosis	Immature
chr6:39082222-39082985		ENSG00000112164_GLP1R,33441			0.0267246	0.318541	Diagnosis	Immature
chr6:39084457-39085243		ENSG00000112164_GLP1R,35676			0.169567	0.434908	Diagnosis	Immature
chr6:39088082-39089007		ENSG00000112164_GLP1R,39301			0.264949	0.481637	Diagnosis	Immature
chr6:41936072-41936963		ENSG00000112576_CCND3,113394			0.0630802	0.369525	Diagnosis	Immature
chr6:41938860-41939806		ENSG00000112576_CCND3,110551			0.167746	0.434265	Diagnosis	Immature
chr6:41941377-41942237		ENSG00000112576_CCND3,108120			0.00147493	0.182371	Diagnosis	Immature
chr6:41970278-41971189		ENSG00000112576_CCND3,79168			0.655793	0.749801	Diagnosis	Immature
chr6:42007216-42008017		ENSG00000112576_CCND3,42340			0.602933	0.704871	Diagnosis	Immature
chr6:42041272-42042191		ENSG00000112576_CCND3,8166			0.106149	0.401801	Diagnosis	Immature
chr6:42043903-42044771		ENSG00000112576_CCND3,5586			0.0360415	0.337312	Diagnosis	Immature
chr6:42045534-42046364		ENSG00000112576_CCND3,3993			0.0460726	0.350694	Diagnosis	Immature
chr6:42048254-42049111	ENSG00000137413_TAF8,-1402;ENSG00000112576_CCND3,1246	ENSG00000112576_CCND3,1246			0.0817236	0.386463	Diagnosis	Immature
chr6:42050134-42051058	ENSG00000112576_CCND3,0;ENSG00000137413_TAF8,0	ENSG00000112576_CCND3,0;ENSG00000137413_TAF8,0			0.146205	0.424171	Diagnosis	Immature
chr6:43769546-43770357	ENSG00000112715_VEGFA,0;ENSG00000272114_AL136131.3,259	ENSG00000112715_VEGFA,0			0.331837	0.517346	Diagnosis	Immature
chr6:43774526-43775441		ENSG00000112715_VEGFA,4342			0.205711	0.452421	Diagnosis	Immature
chr6:77463852-77464670	ENSG00000135312_HTR1B,-79				0.115501	0.407639	Diagnosis	Immature
chr6:88143693-88144493		ENSG00000118432_CNR1,21866			0.540231	0.654081	Diagnosis	Immature
chr6:88165738-88166651	ENSG00000118432_CNR1,0	ENSG00000118432_CNR1,0			0.0912465	0.392974	Diagnosis	Immature
chr6:88166922-88167802	ENSG00000118432_CNR1,-563				0.0140207	0.27561	Diagnosis	Immature
chr6:106972196-106972849		ENSG00000272398_CD24,2778			0.12163	0.410711	Diagnosis	Immature
chr6:106973523-106974223	ENSG00000272398_CD24,1404	ENSG00000272398_CD24,1404			0.00863673	0.246165	Diagnosis	Immature
chr6:108165571-108166333	ENSG00000081087_OSTM1,0;ENSG00000112333_NR2E1,0	ENSG00000081087_OSTM1,0;ENSG00000112333_NR2E1,0			0.639159	0.735615	Diagnosis	Immature
chr6:108168203-108169033		ENSG00000112333_NR2E1,2145			0.378677	0.543018	Diagnosis	Immature
chr6:122779052-122779966	ENSG00000164434_FABP7,0	ENSG00000164434_FABP7,0			0.82344	0.881227	Diagnosis	Immature
chr6:146027432-146028048	ENSG00000152822_GRM1,0	ENSG00000152822_GRM1,0			0.860911	0.90825	Diagnosis	Immature
chr6:146028153-146028571	ENSG00000152822_GRM1,507	ENSG00000152822_GRM1,507			0.803679	0.866634	Diagnosis	Immature
chr6:146032094-146032944		ENSG00000152822_GRM1,4448			0.290418	0.495225	Diagnosis	Immature
chr6:146047188-146048060		ENSG00000152822_GRM1,19542			0.339872	0.521879	Diagnosis	Immature
chr6:146080519-146081357		ENSG00000152822_GRM1,52873			0.525063	0.642314	Diagnosis	Immature
chr6:146100667-146101499		ENSG00000152822_GRM1,73021			0.132788	0.416766	Diagnosis	Immature
chr6:146111690-146112586		ENSG00000152822_GRM1,84044			0.838642	0.89208	Diagnosis	Immature
chr6:146123247-146124027		ENSG00000152822_GRM1,95601			0.689614	0.778058	Diagnosis	Immature
chr6:146145235-146146129		ENSG00000152822_GRM1,117589			0.752492	0.828114	Diagnosis	Immature
chr6:146199831-146200742		ENSG00000152822_GRM1,172185			0.124782	0.412747	Diagnosis	Immature
chr6:146224672-146225501		ENSG00000152822_GRM1,197026			0.260971	0.479816	Diagnosis	Immature
chr6:146240089-146240933		ENSG00000152822_GRM1,212443			0.638187	0.73474	Diagnosis	Immature
chr6:146260658-146261593		ENSG00000152822_GRM1,233012			0.452965	0.589405	Diagnosis	Immature
chr6:146271012-146271869		ENSG00000152822_GRM1,243366			0.581263	0.686745	Diagnosis	Immature
chr6:146274753-146275626		ENSG00000152822_GRM1,247107			0.356985	0.530842	Diagnosis	Immature
chr6:146312340-146313154		ENSG00000152822_GRM1,284694			0.169641	0.434948	Diagnosis	Immature
chr6:146358972-146359867		ENSG00000152822_GRM1,331326			0.0325485	0.331557	Diagnosis	Immature
chr6:146361161-146361913		ENSG00000152822_GRM1,333515			0.457477	0.592548	Diagnosis	Immature
chr6:146365052-146366012		ENSG00000152822_GRM1,337406			0.363697	0.534469	Diagnosis	Immature
chr6:146389465-146390305		ENSG00000152822_GRM1,361819			0.380812	0.544233	Diagnosis	Immature
chr6:146425982-146426812		ENSG00000152822_GRM1,398336			0.153474	0.427631	Diagnosis	Immature
chr6:146429504-146430370		ENSG00000152822_GRM1,401858			0.0154759	0.282997	Diagnosis	Immature
chr6:146434049-146434978		ENSG00000152822_GRM1,406403			0.550254	0.661902	Diagnosis	Immature
chr6:149749333-149750165	ENSG00000120265_PCMT1,0;ENSG00000120253_NUP43,0	ENSG00000120253_NUP43,0;ENSG00000120265_PCMT1,0			0.0139575	0.275396	Diagnosis	Immature
chr6:151687031-151687841		ENSG00000091831_ESR1,30340			0.284394	0.491953	Diagnosis	Immature
chr6:151690205-151690859		ENSG00000091831_ESR1,33514			0.301536	0.500909	Diagnosis	Immature
chr6:151694627-151695514		ENSG00000091831_ESR1,37936			0.347919	0.526075	Diagnosis	Immature
chr6:151763821-151764726		ENSG00000091831_ESR1,107130			0.42165	0.569036	Diagnosis	Immature
chr6:151765373-151766140		ENSG00000091831_ESR1,108682			0.122611	0.41147	Diagnosis	Immature
chr6:151805167-151806041		ENSG00000091831_ESR1,148476			0.119845	0.410023	Diagnosis	Immature
chr6:151807550-151808443		ENSG00000091831_ESR1,150859			0.968606	0.980435	Diagnosis	Immature
chr6:151809068-151809879		ENSG00000091831_ESR1,152377			0.531013	0.647047	Diagnosis	Immature
chr6:152110963-152111869	ENSG00000284615_AL078582.1,-890	ENSG00000091831_ESR1,454272			0.658245	0.751932	Diagnosis	Immature
chr6:152116966-152117768		ENSG00000284615_AL078582.1,4207;ENSG00000091831_ESR1,460275			0.560093	0.669747	Diagnosis	Immature
chr6:152121916-152122754		ENSG00000091831_ESR1,465225;ENSG00000131018_SYNE1,515047			0.767877	0.839603	Diagnosis	Immature
chr6:152124173-152125098		ENSG00000091831_ESR1,467482;ENSG00000131018_SYNE1,512703			0.310266	0.505818	Diagnosis	Immature
chr6:154039044-154039914		ENSG00000112038_OPRM1,28548			0.282073	0.490709	Diagnosis	Immature
chr6:154139670-154140545		ENSG00000112038_OPRM1,129174			0.305175	0.503013	Diagnosis	Immature
chr6:154154237-154155130		ENSG00000112038_OPRM1,143741;ENSG00000074706_IPCEF1,201662			0.293357	0.496809	Diagnosis	Immature
chr6:154155949-154156731		ENSG00000112038_OPRM1,145453;ENSG00000074706_IPCEF1,200061			0.378262	0.542684	Diagnosis	Immature
chr6:154164118-154165010		ENSG00000112038_OPRM1,153622;ENSG00000074706_IPCEF1,191782			0.184443	0.442026	Diagnosis	Immature
chr6:154169217-154170085		ENSG00000112038_OPRM1,158721;ENSG00000074706_IPCEF1,186707			0.70846	0.793333	Diagnosis	Immature
chr6:154197028-154197954		ENSG00000074706_IPCEF1,158838;ENSG00000112038_OPRM1,186532			0.284525	0.491997	Diagnosis	Immature
chr6:154206091-154206742		ENSG00000074706_IPCEF1,150050;ENSG00000112038_OPRM1,195595			0.105302	0.401308	Diagnosis	Immature
chr6:154213553-154214411		ENSG00000074706_IPCEF1,142381;ENSG00000112038_OPRM1,203057			0.863589	0.910078	Diagnosis	Immature
chr6:158644281-158645154	ENSG00000146425_DYNLT1,0	ENSG00000146425_DYNLT1,0			0.0406517	0.343002	Diagnosis	Immature
chr7:6374067-6374913	ENSG00000136238_RAC1,0	ENSG00000136238_RAC1,0			0.143073	0.422808	Diagnosis	Immature
chr7:6393009-6393844		ENSG00000136238_RAC1,18482			0.273257	0.485957	Diagnosis	Immature
chr7:6395851-6396740		ENSG00000136238_RAC1,21324			0.478222	0.607078	Diagnosis	Immature
chr7:6402634-6403216		ENSG00000136238_RAC1,28107			0.958611	0.973891	Diagnosis	Immature
chr7:16921191-16922128		ENSG00000106546_AHR,4832			0.0918688	0.393301	Diagnosis	Immature
chr7:16926004-16926846		ENSG00000106546_AHR,9645			0.245586	0.472108	Diagnosis	Immature
chr7:16960153-16960943		ENSG00000106546_AHR,43794			0.266824	0.482584	Diagnosis	Immature
chr7:16961455-16962310		ENSG00000106546_AHR,45096			0.137433	0.419016	Diagnosis	Immature
chr7:16982406-16983272		ENSG00000106546_AHR,66047;ENSG00000237773_AC073332.1,316096			0.236964	0.467634	Diagnosis	Immature
chr7:16984108-16985017		ENSG00000106546_AHR,67749;ENSG00000237773_AC073332.1,314351			0.982106	0.988998	Diagnosis	Immature
chr7:16989674-16990570		ENSG00000106546_AHR,73315;ENSG00000237773_AC073332.1,308798			0.0408589	0.343002	Diagnosis	Immature
chr7:17041199-17042068		ENSG00000106546_AHR,124840;ENSG00000237773_AC073332.1,257300			0.257069	0.477841	Diagnosis	Immature
chr7:17075601-17076465		ENSG00000106546_AHR,159242;ENSG00000237773_AC073332.1,222903			0.0745717	0.381408	Diagnosis	Immature
chr7:17127422-17128321		ENSG00000237773_AC073332.1,171047;ENSG00000106546_AHR,211063			0.382615	0.545268	Diagnosis	Immature
chr7:17146792-17147697		ENSG00000237773_AC073332.1,151671;ENSG00000106546_AHR,230433			0.271528	0.485033	Diagnosis	Immature
chr7:17234146-17234957		ENSG00000237773_AC073332.1,64411;ENSG00000106546_AHR,317787			0.0726283	0.379674	Diagnosis	Immature
chr7:17298269-17299075	ENSG00000237773_AC073332.1,293	ENSG00000237773_AC073332.1,293;ENSG00000106546_AHR,381910			0.497293	0.620986	Diagnosis	Immature
chr7:17335851-17336760		ENSG00000106546_AHR,419492			0.322109	0.51209	Diagnosis	Immature
chr7:22726128-22726827	ENSG00000136244_IL6,244;ENSG00000105889_STEAP1B,786;ENSG00000179428_AC073072.1,793	ENSG00000136244_IL6,244;ENSG00000105889_STEAP1B,786;ENSG00000179428_AC073072.1,793			0.337204	0.520235	Diagnosis	Immature
chr7:22726988-22727784	ENSG00000105889_STEAP1B,0;ENSG00000179428_AC073072.1,0;ENSG00000136244_IL6,1104	ENSG00000105889_STEAP1B,0;ENSG00000179428_AC073072.1,0;ENSG00000136244_IL6,1104			0.306378	0.503637	Diagnosis	Immature
chr7:24290037-24290923		ENSG00000122585_NPY,5849			0.4256	0.571369	Diagnosis	Immature
chr7:31338199-31339126	ENSG00000164600_NEUROD6,1600	ENSG00000164600_NEUROD6,1600			0.263374	0.480863	Diagnosis	Immature
chr7:31340317-31341174	ENSG00000164600_NEUROD6,0	ENSG00000164600_NEUROD6,0			0.348519	0.526294	Diagnosis	Immature
chr7:41693116-41694020	ENSG00000224116_INHBA-AS1,0	ENSG00000224116_INHBA-AS1,0;ENSG00000122641_INHBA,11814			0.415016	0.565051	Diagnosis	Immature
chr7:41696081-41696963		ENSG00000224116_INHBA-AS1,2197;ENSG00000122641_INHBA,8871			0.22331	0.460996	Diagnosis	Immature
chr7:41704996-41705839	ENSG00000122641_INHBA,0	ENSG00000122641_INHBA,0;ENSG00000224116_INHBA-AS1,11112			0.00959452	0.253293	Diagnosis	Immature
chr7:41964537-41965443		ENSG00000106571_GLI3,272427			0.769771	0.841061	Diagnosis	Immature
chr7:41966949-41967804		ENSG00000106571_GLI3,270066			0.624001	0.72252	Diagnosis	Immature
chr7:41976870-41977714		ENSG00000106571_GLI3,260156			0.151559	0.426759	Diagnosis	Immature
chr7:41978138-41978874		ENSG00000106571_GLI3,258996			0.158824	0.430079	Diagnosis	Immature
chr7:41979638-41980493		ENSG00000106571_GLI3,257377			0.384992	0.546583	Diagnosis	Immature
chr7:41983791-41984716		ENSG00000106571_GLI3,253154			0.577081	0.683384	Diagnosis	Immature
chr7:42065751-42066619		ENSG00000106571_GLI3,171251			0.992554	0.995341	Diagnosis	Immature
chr7:42068611-42069409		ENSG00000106571_GLI3,168461			0.345255	0.524682	Diagnosis	Immature
chr7:42071605-42072483		ENSG00000106571_GLI3,165387			0.142894	0.422613	Diagnosis	Immature
chr7:42151027-42151827		ENSG00000106571_GLI3,86043			0.397001	0.553746	Diagnosis	Immature
chr7:42152497-42153252		ENSG00000106571_GLI3,84618			0.7288	0.809496	Diagnosis	Immature
chr7:42176116-42177051		ENSG00000106571_GLI3,60819			0.544148	0.657127	Diagnosis	Immature
chr7:42227806-42228720		ENSG00000106571_GLI3,9150			0.296056	0.498189	Diagnosis	Immature
chr7:42236361-42236804	ENSG00000106571_GLI3,1066	ENSG00000106571_GLI3,1066			0.403311	0.557968	Diagnosis	Immature
chr7:42237668-42238195	ENSG00000106571_GLI3,0	ENSG00000106571_GLI3,0			0.145192	0.423855	Diagnosis	Immature
chr7:45888375-45889302	ENSG00000146678_IGFBP1,15	ENSG00000146678_IGFBP1,15			0.831288	0.886745	Diagnosis	Immature
chr7:91264015-91264885	ENSG00000157240_FZD1,0	ENSG00000157240_FZD1,0			0.00598021	0.230265	Diagnosis	Immature
chr7:92608392-92609279		ENSG00000105810_CDK6,227315			0.482449	0.610261	Diagnosis	Immature
chr7:92609799-92610580		ENSG00000105810_CDK6,226014			0.350522	0.527385	Diagnosis	Immature
chr7:92611879-92612798		ENSG00000105810_CDK6,223796			0.433592	0.576434	Diagnosis	Immature
chr7:92614507-92615382		ENSG00000105810_CDK6,221212			0.0412226	0.343848	Diagnosis	Immature
chr7:92620859-92621699		ENSG00000105810_CDK6,214895			0.717905	0.800817	Diagnosis	Immature
chr7:92633062-92633952		ENSG00000105810_CDK6,202642			0.515253	0.634766	Diagnosis	Immature
chr7:92634788-92635632		ENSG00000105810_CDK6,200962			0.762256	0.835367	Diagnosis	Immature
chr7:92644588-92645253		ENSG00000105810_CDK6,191341			0.314713	0.508005	Diagnosis	Immature
chr7:92645369-92646018	ENSG00000286742_AC000065.1,-1888	ENSG00000105810_CDK6,190576			0.293938	0.497059	Diagnosis	Immature
chr7:92647478-92648366	ENSG00000286742_AC000065.1,0	ENSG00000286742_AC000065.1,0;ENSG00000105810_CDK6,188228			0.16586	0.433686	Diagnosis	Immature
chr7:92691252-92692096		ENSG00000105810_CDK6,144498			0.34964	0.52692	Diagnosis	Immature
chr7:92695411-92696307		ENSG00000105810_CDK6,140287			0.145614	0.424077	Diagnosis	Immature
chr7:92698192-92699073		ENSG00000105810_CDK6,137521			0.17625	0.437751	Diagnosis	Immature
chr7:92717865-92718717		ENSG00000105810_CDK6,117877			0.0126906	0.269025	Diagnosis	Immature
chr7:92746918-92747810		ENSG00000105810_CDK6,88784			0.37314	0.539905	Diagnosis	Immature
chr7:92755021-92755925		ENSG00000105810_CDK6,80669			0.156666	0.428951	Diagnosis	Immature
chr7:92761186-92762061		ENSG00000105810_CDK6,74533			0.127957	0.414246	Diagnosis	Immature
chr7:92766263-92767098		ENSG00000105810_CDK6,69496			0.10436	0.400731	Diagnosis	Immature
chr7:92768494-92769388		ENSG00000105810_CDK6,67206			0.144314	0.423485	Diagnosis	Immature
chr7:92780896-92781790		ENSG00000105810_CDK6,54804			0.124964	0.412747	Diagnosis	Immature
chr7:92790907-92791738		ENSG00000105810_CDK6,44856			0.0911943	0.392919	Diagnosis	Immature
chr7:92794082-92794865		ENSG00000105810_CDK6,41729			0.322973	0.512657	Diagnosis	Immature
chr7:92809371-92810276		ENSG00000105810_CDK6,26318			0.208157	0.453495	Diagnosis	Immature
chr7:92813132-92814022		ENSG00000105810_CDK6,22572			0.0760599	0.382525	Diagnosis	Immature
chr7:92832941-92833616		ENSG00000105810_CDK6,2978			0.305681	0.503283	Diagnosis	Immature
chr7:92833730-92834180		ENSG00000105810_CDK6,2414			0.159939	0.430544	Diagnosis	Immature
chr7:92836315-92837200	ENSG00000237819_AC002454.1,0;ENSG00000105810_CDK6,0	ENSG00000105810_CDK6,0;ENSG00000237819_AC002454.1,0			0.311887	0.506687	Diagnosis	Immature
chr7:100803239-100804169		ENSG00000196411_EPHB4,23354			0.688384	0.777049	Diagnosis	Immature
chr7:100827027-100827975	ENSG00000196411_EPHB4,0;ENSG00000146828_SLC12A9,207	ENSG00000196411_EPHB4,0;ENSG00000146828_SLC12A9,207			0.228585	0.463297	Diagnosis	Immature
chr7:100889349-100890273	ENSG00000176125_UFSP1,0	ENSG00000176125_UFSP1,0;ENSG00000087085_ACHE,6701			0.00957849	0.253093	Diagnosis	Immature
chr7:100894586-100895391	ENSG00000087085_ACHE,1583	ENSG00000087085_ACHE,1583			0.0702571	0.377699	Diagnosis	Immature
chr7:100896708-100897587	ENSG00000087085_ACHE,0	ENSG00000087085_ACHE,0			0.266248	0.482242	Diagnosis	Immature
chr7:101165172-101166082	ENSG00000128564_VGF,0	ENSG00000128564_VGF,0			0.00217672	0.191381	Diagnosis	Immature
chr7:103523958-103524878		ENSG00000189056_RELN,464780			0.0539196	0.360417	Diagnosis	Immature
chr7:103532681-103533545		ENSG00000189056_RELN,456113			0.504139	0.626211	Diagnosis	Immature
chr7:103538860-103539791		ENSG00000189056_RELN,449867			0.159818	0.430541	Diagnosis	Immature
chr7:103540686-103541583		ENSG00000189056_RELN,448075			0.016309	0.286062	Diagnosis	Immature
chr7:103547333-103548241		ENSG00000189056_RELN,441417			0.907826	0.940101	Diagnosis	Immature
chr7:103573271-103574152		ENSG00000189056_RELN,415506			0.153214	0.42759	Diagnosis	Immature
chr7:103751138-103752050		ENSG00000189056_RELN,237608			0.618811	0.718255	Diagnosis	Immature
chr7:103989073-103989869	ENSG00000189056_RELN,0	ENSG00000189056_RELN,0			0.947929	0.966722	Diagnosis	Immature
chr7:106284669-106285558	ENSG00000273320_AC007032.1,0;ENSG00000105835_NAMPT,768	ENSG00000273320_AC007032.1,0;ENSG00000105835_NAMPT,768			0.00547154	0.224691	Diagnosis	Immature
chr7:107890753-107891687	ENSG00000091140_DLD,0	ENSG00000091140_DLD,0			0.0717554	0.379074	Diagnosis	Immature
chr7:107917573-107918488		ENSG00000091140_DLD,26411			0.369969	0.538102	Diagnosis	Immature
chr7:107932008-107932911		ENSG00000091136_LAMB1,70276			0.522396	0.640304	Diagnosis	Immature
chr7:107934835-107935772		ENSG00000091136_LAMB1,67415			0.329332	0.515971	Diagnosis	Immature
[truncated: 30,754 more rows]
