# Supplementary material for: A roadmap to human hippocampal neurogenesis in adulthood, aging and AD.
Source: Research Square preprint supplement (doi:10.21203/rs.3.rs-4469965/v1), 2024-05-30
Supplement: Supplementary file 15 [file e793ba7e4804959494d125c8.xlsx]

## Sheet: Readme
Read me
Diagnosis
AD	Alzheimer's disease
MCI	Mild cognitive impairements
NCI	No cognitive impairements
APOE_genotype	22	E2E2
	23	E2E3
	24	E2E4
	33	E3E3
	34	E3E4
	44	E4E4
Cogdx	1 NCI: No cognitive impairment (No impaired domains)
	2 MCI: Mild cognitive impairment (One impaired domain) and NO other cause of CI
	3 MCI: Mild cognitive impairment (One impaired domain) AND another cause of CI
	4 AD: Alzheimer’s dementia and NO other cause of CI (NINCDS PROB AD)
	5 AD: Alzheimer’s dementia AND another cause of CI (NINCDS POSS AD)
	6 Other dementia: Other primary cause of dementia
Age_death	Age at death
msex	1 = Male
	0 = Female
braaksc	Braak stages I and II indicate NFTs confined mainly to the entorhinal region of the brain
	Braak stages III and IV indicate involvement of limbic regions such as the hippocampus
	Braak stages V and VI indicate moderate to severe neocortical involvement.
niareagansc	Value	Likelihood of AD
	1	High
	2	Intermediate
	3	Low
	4	No AD
PMI	Post mortum interval

## Sheet: Cases
ID	Diagnosis	Study	apoe_genotype	cogdx	age_death	msex	braaksc	niareagansc	PMI
1	NCI	MAP	33	1	90+	1	4	3	6.66667
2	NCI	MAP	33	1	87.3429	0	3	3	6.26667
3	NCI	MAP	23	1	87.321	0	3	3	11.7333
4	NCI	MAP	33	1	87.6057	0	3	2	7.5
5	NCI	MAP	33	1	84.4764	0	3	3	10.2833
6	NCI	MAP	33	1	82.5435	1	3	3	7.1
7	NCI	MAP	33	1	90+	1	3	3	5.91667
8	NCI	MAP	23	1	88.6379	0	2	3	18.1667
9	NCI	MAP	33	1	87.4196	0	4	2	5.58333
10	NCI	MAP	34	1	90+	0	2	3	7.68333
11	NCI	MAP	33	1	90+	0	3	3	5.91667
12	NCI	MAP	34	1	90+	1	1	3	8.13333
13	NCI	MAP	34	1	90+	1	4	2	11.0333
14	NCI	MAP	34	1	90+	0	2	3	7.5
15	MCI	MAP	33	2	90+	0	4	2	6.01667
16	MCI	MAP	33	2	90+	0	3	3	6.55
17	MCI	MAP	33	2	90+	1	2	3	6.86667
18	MCI	MAP	34	2	90+	0	4	2	7.91667
19	MCI	MAP	33	2	90+	0	5	1	6.08333
20	MCI	MAP	33	2	90+	0	5	2	7.91667
21	MCI	MAP	24	2	86.9733	1	4	2	8.41667
22	MCI	MAP	33	2	85.6947	1	5	2	5.83333
23	MCI	MAP	33	2	90+	0	5	1	8
24	MCI	MAP	33	2	79.499	1	1	2	9.65
25	MCI	MAP	23	2	90+	0	3	2	17.9667
26	MCI	MAP	33	2	90+	1	4	2	6
27	MCI	MAP	34	2	90+	0	5	1	16
28	MCI	MAP	33	2	90+	1	3	3	6.8
29	AD	MAP	33	4	90+	0	5	2	6.25
30	AD	MAP	33	4	90+	0	4	2	4.86667
31	AD	MAP	24	4	87.1294	1	5	1	9.5
32	AD	MAP	33	4	89.2567	1	4	2	17.25
33	AD	MAP	33	4	90+	0	5	2	20.8333
34	AD	MAP	34	4	90+	0	5	1	8.58333
35	AD	MAP	33	4	90+	0	5	1	7.25
36	AD	MAP	34	4	90+	0	5	1	5
37	AD	MAP	34	4	85.2786	0	5	1	6.95
38	AD	MAP	33	4	90+	0	3	2	6.6
39	AD	MAP	33	4	84.6352	0	4	2	15.6333
40	AD	MAP	33	4	85.0185	0	4	2	8.33333
41	AD	MAP	33	4	90+	0	6	1	8.5
42	AD	MAP	33	4	89.1389	1	3	3	6.05
