# Supplementary material for: A roadmap to human hippocampal neurogenesis in adulthood, aging and AD.
Source: Research Square preprint supplement (doi:10.21203/rs.3.rs-4469965/v1), 2024-05-30
Supplement: Supplementary file 16 [file f8fa44e6e8ac8f6b9550e45d.xlsx]

## Sheet: README
CODE	Acronym in manuscript
HA	NCI
YC	YA
MCI	MCI
AD	AD

## Sheet: pseudobulk-RNA_signif_GOBP
Contrast	Cluster	Direction	Pathway ID	Pathway Name	Pathway Description	Log2 Fold Enrichment	p-value	q-value	Genes in intersection
Diagnosis	Immature	Up	GO BP	GOBP_COTRANSLATIONAL_PROTEIN_TARGETING_TO_MEMBRANE	GOBP_COTRANSLATIONAL_PROTEIN_TARGETING_TO_MEMBRANE	3.8739	7.83067e-09	4.2638e-05	RPL26,RPS27A,RPL23,RPS3,RPL12,RPL32,RPS3A,RPS4X,RPS18,SRPRA
Diagnosis	Immature	Up	GO BP	GOBP_PROTEIN_LOCALIZATION_TO_ENDOPLASMIC_RETICULUM	GOBP_PROTEIN_LOCALIZATION_TO_ENDOPLASMIC_RETICULUM	3.50884	1.67278e-08	4.55414e-05	RPL26,RPS27A,RPL23,RPS3,RPL12,RPL32,RPS3A,RPS4X,RPS18,GABARAPL2,SRPRA
Diagnosis	Immature	Up	GO BP	GOBP_ESTABLISHMENT_OF_PROTEIN_LOCALIZATION_TO_ENDOPLASMIC_RETICULUM	GOBP_ESTABLISHMENT_OF_PROTEIN_LOCALIZATION_TO_ENDOPLASMIC_RETICULUM	3.67227	2.66843e-08	4.8432e-05	RPL26,RPS27A,RPL23,RPS3,RPL12,RPL32,RPS3A,RPS4X,RPS18,SRPRA
Diagnosis	Immature	Up	GO BP	GOBP_PROTEIN_TARGETING_TO_MEMBRANE	GOBP_PROTEIN_TARGETING_TO_MEMBRANE	3.12273	6.27212e-08	8.53793e-05	RPL26,RPS27A,RPL23,RPS3,RPL12,RPL32,RPS3A,RPS4X,RPS18,RTP5,NACA,SRPRA
Diagnosis	Immature	Up	GO BP	GOBP_NUCLEAR_TRANSCRIBED_MRNA_CATABOLIC_PROCESS_NONSENSE_MEDIATED_DECAY	GOBP_NUCLEAR_TRANSCRIBED_MRNA_CATABOLIC_PROCESS_NONSENSE_MEDIATED_DECAY	3.46862	3.89582e-07	0.000424255	RPL26,RPS27A,RPL23,RPS3,RPL12,RPL32,RPS3A,RPS4X,RPS18
Diagnosis	Immature	Up	GO BP	GOBP_PROTEIN_LOCALIZATION_TO_MEMBRANE	GOBP_PROTEIN_LOCALIZATION_TO_MEMBRANE	2.02371	2.80467e-06	0.00254524	RPL26,RPS27A,RPL23,RPS3,TPBG,RPL12,RPL32,RPS3A,RPS4X,RPS18,EPHA3,PPP2R5A,CACNG5,RTP5,NACA,SRPRA,GRIN2C,ANK1
Diagnosis	Immature	Up	GO BP	GOBP_POSITIVE_REGULATION_OF_SIGNALING	GOBP_POSITIVE_REGULATION_OF_SIGNALING	1.5177	4.30552e-06	0.00334908	CRH,CTNNA1,IGF1,MT3,RPL26,RPS27A,RPL23,ERBB4,FLT3,HTR2A,RPS3,TPBG,LAMA2,RELN,LGR6,CCN4,IL6ST,NMU,ANO1,NKD1,TXK,PLA2R1,P2RX2,GPR17,NNAT,CACNG5,ADAMTS20,GRIN2C,FRMD7,C18ORF32,GPR137C
Diagnosis	Immature	Up	GO BP	GOBP_ESTABLISHMENT_OF_PROTEIN_LOCALIZATION_TO_MEMBRANE	GOBP_ESTABLISHMENT_OF_PROTEIN_LOCALIZATION_TO_MEMBRANE	2.31153	1.61064e-05	0.0106931	RPL26,RPS27A,RPL23,RPS3,RPL12,RPL32,RPS3A,RPS4X,RPS18,RTP5,NACA,SRPRA
Diagnosis	Immature	Up	GO BP	GOBP_CATION_TRANSPORT	GOBP_CATION_TRANSPORT	1.58563	1.93337e-05	0.0106931	CRH,TRPC3,VIP,FTH1,MT3,TMEM165,HTR2A,RELN,CXCL12,SLC22A3,ANO1,P2RX2,NETO2,CACNG5,RYR3,SLC6A1,TRPM6,SLC5A8,SLC13A5,GRIN2C,ASIC4,SCNN1G,KCNQ4
Diagnosis	Immature	Up	GO BP	GOBP_TRANSLATIONAL_INITIATION	GOBP_TRANSLATIONAL_INITIATION	2.7331	1.96383e-05	0.0106931	RPL26,RPS27A,RPL23,RPS3,RPL12,RPL32,RPS3A,RPS4X,RPS18
Diagnosis	Immature	Up	GO BP	GOBP_VIRAL_GENE_EXPRESSION	GOBP_VIRAL_GENE_EXPRESSION	2.69398	2.40479e-05	0.0119037	RPL26,RPS27A,RPL23,RPS3,RPL12,RPL32,RPS3A,RPS4X,RPS18
Diagnosis	Immature	Up	GO BP	GOBP_PROTEIN_TARGETING	GOBP_PROTEIN_TARGETING	2.10115	3.22027e-05	0.0132691	RPL26,RPS27A,RPL23,RPS3,RPL12,RPL32,RPS3A,RPS4X,RPS18,TOMM7,RTP5,NACA,SRPRA
Diagnosis	Immature	Up	GO BP	GOBP_SYNAPTIC_SIGNALING	GOBP_SYNAPTIC_SIGNALING	1.80076	3.24498e-05	0.0132691	UNC13B,CRH,HTR2A,TPBG,LAMA2,RELN,NMU,P2RX2,CHRM2,CACNG5,SLC6A1,PLCB4,PDE7B,GRIN2C,SV2C,GRIK1,GRID2IP
Diagnosis	Immature	Up	GO BP	GOBP_NUCLEAR_TRANSCRIBED_MRNA_CATABOLIC_PROCESS	GOBP_NUCLEAR_TRANSCRIBED_MRNA_CATABOLIC_PROCESS	2.62609	3.41172e-05	0.0132691	RPL26,RPS27A,RPL23,RPS3,RPL12,RPL32,RPS3A,RPS4X,RPS18
Diagnosis	Immature	Up	GO BP	GOBP_REGENERATION	GOBP_REGENERATION	2.61598	9.42719e-05	0.0342207	CTNNA1,IGF1,ERBB4,FLT3,LGR6,CXCL12,TEC,TXK
Diagnosis	Immature	Up	GO BP	GOBP_SENSORY_PERCEPTION_OF_PAIN	GOBP_SENSORY_PERCEPTION_OF_PAIN	3.12022	0.000114092	0.038827	VIP,HTR2A,CXCL12,NMU,ANO1,TAFA4
Diagnosis	Immature	Up	GO BP	GOBP_REGULATION_OF_SYSTEM_PROCESS	GOBP_REGULATION_OF_SYSTEM_PROCESS	1.81456	0.000127931	0.0409755	UNC13B,CRH,IGF1,TRPC3,VIP,MLIP,HTR2A,RELN,IL6ST,NMU,CHRM2,CACNG5,RYR3,TAFA4
Diagnosis	Immature	Up	GO BP	GOBP_TISSUE_REGENERATION	GOBP_TISSUE_REGENERATION	3.37123	0.000196601	0.0594717	IGF1,ERBB4,LGR6,TEC,TXK
Diagnosis	Immature	Up	GO BP	GOBP_EXTERNAL_ENCAPSULATING_STRUCTURE_ORGANIZATION	GOBP_EXTERNAL_ENCAPSULATING_STRUCTURE_ORGANIZATION	1.97568	0.000245819	0.0704466	PHLDB1,LAMA2,NTN4,COL6A1,HAPLN1,FBN2,SMOC1,NDNF,ADAMTS17,ADAMTS20,COL5A3
Diagnosis	Immature	Up	GO BP	GOBP_DETECTION_OF_TEMPERATURE_STIMULUS_INVOLVED_IN_SENSORY_PERCEPTION	GOBP_DETECTION_OF_TEMPERATURE_STIMULUS_INVOLVED_IN_SENSORY_PERCEPTION	4.80603	0.000286737	0.078064	HTR2A,CXCL12,ANO1
Diagnosis	Immature	Up	GO BP	GOBP_MONOAMINE_TRANSPORT	GOBP_MONOAMINE_TRANSPORT	3.16112	0.00037064	0.0961018	CRH,VIP,HTR2A,CXCL12,SLC22A3
Diagnosis	Immature	Up	GO BP	GOBP_ORGANIC_CYCLIC_COMPOUND_CATABOLIC_PROCESS	GOBP_ORGANIC_CYCLIC_COMPOUND_CATABOLIC_PROCESS	1.64804	0.000389401	0.0963768	VIP,MT3,RPL26,RPS27A,RPL23,RPS3,RPL12,RPL32,RPS3A,RPS4X,RPS18,PDE10A,PDE7B,ENTPD3
Diagnosis	Immature	Up	GO BP	GOBP_POSITIVE_REGULATION_OF_SECRETION	GOBP_POSITIVE_REGULATION_OF_SECRETION	2.0929	0.000481116	0.113899	UNC13B,CRH,IGF1,VIP,CXCL12,NMU,ANO1,PLA2R1,NNAT
Diagnosis	Immature	Up	GO BP	GOBP_CELL_CELL_SIGNALING	GOBP_CELL_CELL_SIGNALING	1.20421	0.000510018	0.114815	UNC13B,CRH,VIP,RPS27A,HTR2A,TPBG,LAMA2,RELN,LGR6,CXCL12,CCN4,ENPEP,NMU,ANO1,NKD1,P2RX2,NNAT,CHRM2,CACNG5,SLC6A1,PLCB4,PDE7B,GRIN2C,SV2C,GRIK1,GRID2IP
Diagnosis	Immature	Up	GO BP	GOBP_POSITIVE_REGULATION_OF_INTRACELLULAR_SIGNAL_TRANSDUCTION	GOBP_POSITIVE_REGULATION_OF_INTRACELLULAR_SIGNAL_TRANSDUCTION	1.39421	0.000541117	0.114815	CRH,IGF1,MT3,RPL26,RPS27A,RPL23,ERBB4,FLT3,HTR2A,RPS3,TPBG,RELN,PLA2R1,P2RX2,GPR17,FRMD7,C18ORF32,GPR137C
Diagnosis	Immature	Up	GO BP	GOBP_DETECTION_OF_TEMPERATURE_STIMULUS	GOBP_DETECTION_OF_TEMPERATURE_STIMULUS	4.44523	0.000548243	0.114815	HTR2A,CXCL12,ANO1
Diagnosis	Immature	Up	GO BP	GOBP_POSITIVE_REGULATION_OF_SIGNAL_TRANSDUCTION_BY_P53_CLASS_MEDIATOR	GOBP_POSITIVE_REGULATION_OF_SIGNAL_TRANSDUCTION_BY_P53_CLASS_MEDIATOR	4.3666	0.000631221	0.116936	RPL26,RPL23,PLA2R1
Diagnosis	Immature	Up	GO BP	GOBP_SYNAPTIC_TRANSMISSION_GLUTAMATERGIC	GOBP_SYNAPTIC_TRANSMISSION_GLUTAMATERGIC	2.97746	0.000641779	0.116936	UNC13B,HTR2A,RELN,CACNG5,GRIK1
Diagnosis	Immature	Up	GO BP	GOBP_REGULATION_OF_NERVOUS_SYSTEM_PROCESS	GOBP_REGULATION_OF_NERVOUS_SYSTEM_PROCESS	2.62946	0.000644931	0.116936	UNC13B,VIP,RELN,NMU,CACNG5,TAFA4
Diagnosis	Immature	Up	GO BP	GOBP_TRANSMEMBRANE_TRANSPORT	GOBP_TRANSMEMBRANE_TRANSPORT	1.20883	0.000685697	0.116936	CRH,IGF1,TRPC3,TMEM165,RPS27A,HTR2A,TOMM7,RELN,SLC22A3,ANO1,P2RX2,NETO2,AQP3,CACNG5,RYR3,SLC6A1,TRPM6,SLC5A8,SLC13A5,GRIN2C,ASIC4,SCNN1G,KCNQ4,SV2C,GRIK1
Diagnosis	Immature	Up	GO BP	GOBP_POSITIVE_REGULATION_OF_PEPTIDYL_TYROSINE_PHOSPHORYLATION	GOBP_POSITIVE_REGULATION_OF_PEPTIDYL_TYROSINE_PHOSPHORYLATION	2.35434	0.000705288	0.116936	IGF1,ERBB4,FLT3,HTR2A,RELN,IL6ST,TEC
Diagnosis	Immature	Up	GO BP	GOBP_SENSORY_PERCEPTION_OF_TEMPERATURE_STIMULUS	GOBP_SENSORY_PERCEPTION_OF_TEMPERATURE_STIMULUS	4.29211	0.000721803	0.116936	HTR2A,CXCL12,ANO1
Diagnosis	Immature	Up	GO BP	GOBP_REGULATION_OF_INTRACELLULAR_SIGNAL_TRANSDUCTION	GOBP_REGULATION_OF_INTRACELLULAR_SIGNAL_TRANSDUCTION	1.14523	0.000724793	0.116936	CRH,IGF1,MT3,RPL26,RPS27A,RPL23,ERBB4,FLT3,PHLPP1,HTR2A,RPS3,TPBG,SPRY4,RELN,CXCL12,VAV2,PLA2R1,ARHGAP6,P2RX2,GPR17,PDE10A,TRIM67,FRMD7,C18ORF32,SYDE2,GPR137C
Diagnosis	Immature	Up	GO BP	GOBP_CIRCULATORY_SYSTEM_PROCESS	GOBP_CIRCULATORY_SYSTEM_PROCESS	1.61598	0.000730181	0.116936	CRH,TAC3,HTR2A,CXCL12,SLC22A3,ENPEP,NMU,P2RX2,CHRM2,SGCZ,CACNG5,RYR3,SLC6A1
Diagnosis	Immature	Up	GO BP	GOBP_CATECHOLAMINE_SECRETION	GOBP_CATECHOLAMINE_SECRETION	3.42391	0.000755252	0.117496	CRH,VIP,HTR2A,CXCL12
Diagnosis	Immature	Up	GO BP	GOBP_DETECTION_OF_STIMULUS_INVOLVED_IN_SENSORY_PERCEPTION_OF_PAIN	GOBP_DETECTION_OF_STIMULUS_INVOLVED_IN_SENSORY_PERCEPTION_OF_PAIN	4.22119	0.00082026	0.121267	HTR2A,CXCL12,ANO1
Diagnosis	Immature	Up	GO BP	GOBP_REGULATION_OF_SMALL_GTPASE_MEDIATED_SIGNAL_TRANSDUCTION	GOBP_REGULATION_OF_SMALL_GTPASE_MEDIATED_SIGNAL_TRANSDUCTION	1.97901	0.000824037	0.121267	IGF1,SPRY4,RELN,VAV2,ARHGAP6,GPR17,TRIM67,FRMD7,SYDE2
Diagnosis	Immature	Up	GO BP	GOBP_POSITIVE_REGULATION_OF_SYNAPTIC_TRANSMISSION	GOBP_POSITIVE_REGULATION_OF_SYNAPTIC_TRANSMISSION	2.54198	0.0008719	0.124934	CRH,LAMA2,RELN,NMU,CACNG5,GRIN2C
Diagnosis	Immature	Up	GO BP	GOBP_REGULATION_OF_MUSCLE_HYPERTROPHY	GOBP_REGULATION_OF_MUSCLE_HYPERTROPHY	3.33832	0.000930495	0.129911	IGF1,TRPC3,MLIP,IL6ST
Diagnosis	Immature	Up	GO BP	GOBP_POSITIVE_REGULATION_OF_OSTEOBLAST_DIFFERENTIATION	GOBP_POSITIVE_REGULATION_OF_OSTEOBLAST_DIFFERENTIATION	3.28343	0.0010621	0.13783	IGF1,FBN2,CCN4,IL6ST
Diagnosis	Immature	Up	GO BP	GOBP_POSITIVE_REGULATION_OF_PEPTIDE_SECRETION	GOBP_POSITIVE_REGULATION_OF_PEPTIDE_SECRETION	2.46949	0.0011171	0.13783	UNC13B,CRH,IGF1,NMU,ANO1,NNAT
Diagnosis	Immature	Up	GO BP	GOBP_CALCIUM_ION_TRANSPORT	GOBP_CALCIUM_ION_TRANSPORT	1.79528	0.00112483	0.13783	CRH,TRPC3,TMEM165,HTR2A,CXCL12,P2RX2,CACNG5,RYR3,TRPM6,GRIN2C
Diagnosis	Immature	Up	GO BP	GOBP_RESPONSE_TO_WOUNDING	GOBP_RESPONSE_TO_WOUNDING	1.54319	0.00112813	0.13783	CTNNA1,IGF1,TRPC3,CARMIL1,CCN4,ACTG1,NDNF,TEC,TXK,VAV2,P2RX2,GRIN2C,DCBLD2
Diagnosis	Immature	Up	GO BP	GOBP_PHOSPHOLIPASE_C_ACTIVATING_G_PROTEIN_COUPLED_RECEPTOR_SIGNALING_PATHWAY	GOBP_PHOSPHOLIPASE_C_ACTIVATING_G_PROTEIN_COUPLED_RECEPTOR_SIGNALING_PATHWAY	2.78358	0.00113746	0.13783	VIP,HTR2A,ANO1,GPR17,CHRM2
Diagnosis	Immature	Up	GO BP	GOBP_CATION_TRANSMEMBRANE_TRANSPORT	GOBP_CATION_TRANSMEMBRANE_TRANSPORT	1.37538	0.00114433	0.13783	CRH,TRPC3,TMEM165,HTR2A,RELN,ANO1,P2RX2,NETO2,CACNG5,RYR3,SLC6A1,TRPM6,GRIN2C,ASIC4,SCNN1G,KCNQ4
Diagnosis	Immature	Up	GO BP	GOBP_RESPONSE_TO_PAIN	GOBP_RESPONSE_TO_PAIN	4.02927	0.00116545	0.13783	CRH,RELN,P2RX2
Diagnosis	Immature	Up	GO BP	GOBP_REGULATION_OF_TRANS_SYNAPTIC_SIGNALING	GOBP_REGULATION_OF_TRANS_SYNAPTIC_SIGNALING	1.78395	0.00118972	0.13783	CRH,HTR2A,LAMA2,RELN,NMU,CACNG5,PLCB4,GRIN2C,GRIK1,GRID2IP
Diagnosis	Immature	Up	GO BP	GOBP_METAL_ION_TRANSPORT	GOBP_METAL_ION_TRANSPORT	1.68133	0.00122725	0.139216	CRH,TRPC3,MT3,TMEM165,HTR2A,CXCL12,P2RX2,CACNG5,RYR3,TRPM6,GRIN2C
Diagnosis	Immature	Up	GO BP	GOBP_POSITIVE_REGULATION_OF_MUSCLE_HYPERTROPHY	GOBP_POSITIVE_REGULATION_OF_MUSCLE_HYPERTROPHY	3.97039	0.00129794	0.144231	IGF1,TRPC3,IL6ST
Diagnosis	Immature	Up	GO BP	GOBP_METAL_ION_HOMEOSTASIS	GOBP_METAL_ION_HOMEOSTASIS	1.50683	0.00139679	0.15163	TRPC3,FTH1,MT3,TMEM165,HTR2A,NUBP1,CXCL12,NMU,P2RX2,GPR17,RYR3,GRIN2C,SCNN1G
Diagnosis	Immature	Up	GO BP	GOBP_RNA_CATABOLIC_PROCESS	GOBP_RNA_CATABOLIC_PROCESS	1.7468	0.00142851	0.15163	VIP,RPL26,RPS27A,RPL23,RPS3,RPL12,RPL32,RPS3A,RPS4X,RPS18
Diagnosis	Immature	Up	GO BP	GOBP_REGULATION_OF_BODY_FLUID_LEVELS	GOBP_REGULATION_OF_BODY_FLUID_LEVELS	1.6498	0.00144808	0.15163	TRPC3,VIP,ERBB4,CARMIL1,ACTG1,TEC,TXK,VAV2,P2RX2,AQP3,SCNN1G
Diagnosis	Immature	Up	GO BP	GOBP_ESTABLISHMENT_OF_PROTEIN_LOCALIZATION_TO_ORGANELLE	GOBP_ESTABLISHMENT_OF_PROTEIN_LOCALIZATION_TO_ORGANELLE	1.55633	0.00155909	0.160174	RPL26,RPS27A,RPL23,RPS3,RPL12,RPL32,RPS3A,RPS4X,RPS18,TOMM7,CACNG5,SRPRA
Diagnosis	Immature	Up	GO BP	GOBP_POSITIVE_REGULATION_OF_ION_TRANSPORT	GOBP_POSITIVE_REGULATION_OF_ION_TRANSPORT	1.47364	0.00169377	0.167264	UNC13B,CRH,IGF1,TRPC3,VIP,TOMM7,RELN,CXCL12,NMU,ANO1,PLA2R1,P2RX2,NNAT
Diagnosis	Immature	Up	GO BP	GOBP_POSITIVE_REGULATION_OF_TYROSINE_PHOSPHORYLATION_OF_STAT_PROTEIN	GOBP_POSITIVE_REGULATION_OF_TYROSINE_PHOSPHORYLATION_OF_STAT_PROTEIN	3.08384	0.00172021	0.167264	IGF1,ERBB4,FLT3,IL6ST
Diagnosis	Immature	Up	GO BP	GOBP_SLEEP	GOBP_SLEEP	3.80714	0.00175097	0.167264	CRH,HTR2A,NMU
Diagnosis	Immature	Up	GO BP	GOBP_RESPONSE_TO_ATP	GOBP_RESPONSE_TO_ATP	3.80714	0.00175097	0.167264	TRPC3,P2RX2,RYR3
Diagnosis	Immature	Up	GO BP	GOBP_MULTICELLULAR_ORGANISMAL_RESPONSE_TO_STRESS	GOBP_MULTICELLULAR_ORGANISMAL_RESPONSE_TO_STRESS	3.06053	0.00181857	0.170726	CRH,RELN,P2RX2,ASIC4
Diagnosis	Immature	Up	GO BP	GOBP_REGULATION_OF_SYNAPTIC_TRANSMISSION_GLUTAMATERGIC	GOBP_REGULATION_OF_SYNAPTIC_TRANSMISSION_GLUTAMATERGIC	3.03789	0.00192076	0.173727	HTR2A,RELN,CACNG5,GRIK1
Diagnosis	Immature	Up	GO BP	GOBP_ACTIVATION_OF_PHOSPHOLIPASE_C_ACTIVITY	GOBP_ACTIVATION_OF_PHOSPHOLIPASE_C_ACTIVITY	3.75544	0.00192123	0.173727	HTR2A,TXK,ARHGAP6
Diagnosis	Immature	Up	GO BP	GOBP_REGULATION_OF_OSTEOBLAST_DIFFERENTIATION	GOBP_REGULATION_OF_OSTEOBLAST_DIFFERENTIATION	2.59948	0.00194625	0.173727	IGF1,FBN2,CCN4,IL6ST,SMOC1
Diagnosis	Immature	Up	GO BP	GOBP_WOUND_HEALING	GOBP_WOUND_HEALING	1.58263	0.0020501	0.17663	IGF1,TRPC3,CARMIL1,CCN4,ACTG1,NDNF,TEC,TXK,VAV2,P2RX2,DCBLD2
Diagnosis	Immature	Up	GO BP	GOBP_PEPTIDYL_TYROSINE_MODIFICATION	GOBP_PEPTIDYL_TYROSINE_MODIFICATION	1.77824	0.00206412	0.17663	IGF1,ERBB4,FLT3,HTR2A,EPHA3,RELN,IL6ST,TEC,TXK
Diagnosis	Immature	Up	GO BP	GOBP_REGULATION_OF_CARDIAC_MUSCLE_ADAPTATION	GOBP_REGULATION_OF_CARDIAC_MUSCLE_ADAPTATION	5.21065	0.00207609	0.17663	TRPC3,MLIP
Diagnosis	Immature	Up	GO BP	GOBP_REGULATION_OF_PHOSPHOLIPASE_ACTIVITY	GOBP_REGULATION_OF_PHOSPHOLIPASE_ACTIVITY	2.99335	0.00213695	0.179011	HTR2A,TXK,PLA2R1,ARHGAP6
Diagnosis	Immature	Up	GO BP	GOBP_TONIC_SMOOTH_MUSCLE_CONTRACTION	GOBP_TONIC_SMOOTH_MUSCLE_CONTRACTION	5.01835	0.00258195	0.213011	HTR2A,NMU
Diagnosis	Immature	Up	GO BP	GOBP_CELLULAR_HOMEOSTASIS	GOBP_CELLULAR_HOMEOSTASIS	1.28532	0.00269198	0.213375	UNC13B,CRH,TRPC3,FTH1,MT3,TMEM165,HTR2A,NUBP1,CXCL12,NMU,ANO1,P2RX2,GPR17,SGCZ,RYR3,GRIN2C
Diagnosis	Immature	Up	GO BP	GOBP_REGULATION_OF_SENSORY_PERCEPTION	GOBP_REGULATION_OF_SENSORY_PERCEPTION	3.56932	0.00270392	0.213375	VIP,NMU,TAFA4
Diagnosis	Immature	Up	GO BP	GOBP_REGULATION_OF_INTRINSIC_APOPTOTIC_SIGNALING_PATHWAY_IN_RESPONSE_TO_DNA_DAMAGE	GOBP_REGULATION_OF_INTRINSIC_APOPTOTIC_SIGNALING_PATHWAY_IN_RESPONSE_TO_DNA_DAMAGE	3.56932	0.00270392	0.213375	RPL26,RPS3,CXCL12
Diagnosis	Immature	Up	GO BP	GOBP_ION_HOMEOSTASIS	GOBP_ION_HOMEOSTASIS	1.33021	0.0028014	0.217909	CRH,TRPC3,FTH1,MT3,TMEM165,HTR2A,NUBP1,CXCL12,NMU,P2RX2,GPR17,RYR3,GRIN2C,SCNN1G
Diagnosis	Immature	Up	GO BP	GOBP_POSITIVE_REGULATION_OF_SMALL_GTPASE_MEDIATED_SIGNAL_TRANSDUCTION	GOBP_POSITIVE_REGULATION_OF_SMALL_GTPASE_MEDIATED_SIGNAL_TRANSDUCTION	2.86748	0.00288537	0.221279	IGF1,RELN,GPR17,FRMD7
1.YC/0.HA	Immature	Up	GO BP	GOBP_CELL_CELL_SIGNALING	GOBP_CELL_CELL_SIGNALING	1.16095	1.10046e-09	3.73874e-06	MERTK,UNC13B,CORT,CRH,EGFR,ROR2,PNOC,CHD7,STK3,TAC1,VIP,WNT7A,FZD4,LGR5,SOX4,YAP1,CUX2,MITF,WWOX,REST,SOX2,SOX10,SREBF1,TCF7L2,NR2E1,SOX13,ADRA1D,ADRA2A,FGF2,GRM4,IGFBP4,NTRK2,TPBG,NGF,EXT1,LRP5,CSPG5,ARC,BAMBI,LAMA2,RELN,LGR6,SST,TRPM4,NOS1,SLC32A1,SYT9,RPH3A,GAD2,KMO,NMU,ANO1,GPC6,FZD6,NKD1,TMEM131L,RAPGEF3,SLC12A2,STAB1,TSPAN12,NPY,RBMS3,GIPR,KCNS3,CACNA1A,CHRM2,CACNG5,SLC1A2,SLC6A1,SLC17A8,PL…
1.YC/0.HA	Immature	Up	GO BP	GOBP_SYNAPTIC_SIGNALING	GOBP_SYNAPTIC_SIGNALING	1.53152	1.37327e-09	3.73874e-06	UNC13B,CORT,CRH,EGFR,ROR2,PNOC,TAC1,WNT7A,CUX2,NR2E1,ADRA2A,GRM4,NTRK2,TPBG,NGF,EXT1,CSPG5,ARC,LAMA2,RELN,SST,NOS1,SLC32A1,SYT9,RPH3A,GAD2,KMO,NMU,SLC12A2,NPY,CACNA1A,CHRM2,CACNG5,SLC1A2,SLC6A1,SLC17A8,PLCB4,PDE7B,SLC12A7,GRIN2C,SHISA8,SV2C,CALB2,FCHSD2,PXK,GRIK1,CHRNA2,GRID2IP,CHRNA6
1.YC/0.HA	Immature	Up	GO BP	GOBP_SENSORY_ORGAN_DEVELOPMENT	GOBP_SENSORY_ORGAN_DEVELOPMENT	1.54887	5.41092e-08	8.90252e-05	MERTK,EGFR,NECTIN3,SOX8,ROR2,CHD7,TGFB2,WNT7A,FZD4,LGR5,NECTIN1,DLX1,HIPK2,MITF,PRRX1,SOX2,NR2E1,SPRED1,SPRED2,FGF2,SPRED3,NTRK2,LRP5,PTPRM,DCHS1,NTN1,COL5A2,FBN2,SH3PXD2B,CHRDL1,PROM1,MAN2A1,FZD6,NKD1,TSPAN12,SLC17A8,VSX1,KCNQ4
1.YC/0.HA	Immature	Up	GO BP	GOBP_RETINA_DEVELOPMENT_IN_CAMERA_TYPE_EYE	GOBP_RETINA_DEVELOPMENT_IN_CAMERA_TYPE_EYE	2.39797	7.5415e-08	8.90252e-05	MERTK,NECTIN3,SOX8,CHD7,TGFB2,FZD4,NECTIN1,DLX1,HIPK2,NR2E1,NTRK2,LRP5,PTPRM,PROM1,MAN2A1,TSPAN12,SLC17A8,VSX1
1.YC/0.HA	Immature	Up	GO BP	GOBP_SENSORY_SYSTEM_DEVELOPMENT	GOBP_SENSORY_SYSTEM_DEVELOPMENT	1.74468	8.17495e-08	8.90252e-05	MERTK,NECTIN3,SOX8,CHD7,TGFB2,WNT7A,FZD4,NECTIN1,DLX1,HIPK2,MITF,SOX2,NR2E1,SPRED1,SPRED2,FGF2,SPRED3,NTRK2,LRP5,PTPRM,COL5A2,FBN2,SH3PXD2B,CHRDL1,PROM1,MAN2A1,NKD1,TSPAN12,SLC17A8,VSX1
1.YC/0.HA	Immature	Up	GO BP	GOBP_POSITIVE_REGULATION_OF_DEVELOPMENTAL_PROCESS	GOBP_POSITIVE_REGULATION_OF_DEVELOPMENTAL_PROCESS	1.14529	1.00837e-07	8.92424e-05	ETV5,SOX8,IGF1,ROR2,CHD7,BCL6,STK3,TGFB2,WNT7A,FZD4,SOX4,OLIG2,YAP1,ARX,DLX1,DNMT3B,FOXO3,CUX2,HIPK2,NFATC2,PAWR,REST,SOX2,SOX10,TCF7L2,NR2E1,SOX13,TRIB1,DUSP10,PIK3R6,ERBB4,FGF2,NPNT,NTRK2,PLA2G5,TPBG,NGF,PHLDB1,PHLDB2,LRP5,NFE2L2,COBL,PDPN,CSPG5,GRIP1,BAMBI,EEF2K,NEDD9,RELN,NTN1,FBN2,SOX6,TRPM4,PROM1,NAPEPLD,MAN2A1,F3,RAB7B,RAPGEF3,VEZF1,FAXDC2,EFEMP2,OLFM2,ADAMTS20,WIF1
1.YC/0.HA	Immature	Up	GO BP	GOBP_REGULATION_OF_CELL_DIFFERENTIATION	GOBP_REGULATION_OF_CELL_DIFFERENTIATION	1.0513	1.27393e-07	8.92424e-05	EGFR,ETV5,SOX8,IGF1,ROR2,CHD7,BCL6,STK3,TGFB2,WNT7A,HDAC4,SOX4,OLIG2,YAP1,DLX1,DNMT3B,FOXO3,CUX2,MITF,NFATC2,REST,SOX2,SOX10,TCF7L2,NR2E1,TRPS1,SOX13,ZNF536,TRIB1,DUSP10,PIK3R6,SPRED1,SPRED2,FGF2,NPNT,SPRED3,NTRK2,PLA2G5,SEMA6A,SH3RF1,SPRY4,NGF,PHLDB1,KAT2B,PHLDB2,LRP5,NFE2L2,PDPN,CSPG5,BAMBI,EEF2K,OSTN,NEDD9,PRKCQ,RELN,NTN1,COL5A2,FBN2,SOX6,ADAMTS12,TRPM4,PROM1,NAPEPLD,MAN2A1,TMEM131L,TNFRSF21,T…
1.YC/0.HA	Immature	Up	GO BP	GOBP_NEGATIVE_REGULATION_OF_SIGNALING	GOBP_NEGATIVE_REGULATION_OF_SIGNALING	1.10163	1.31118e-07	8.92424e-05	CRH,EGFR,IGF1,ROR2,BCL6,STK3,TGFB2,FZD4,YAP1,DLX1,HIPK2,PAWR,WWOX,OTUD7B,REST,SOX2,SOX10,SREBF1,TCF7L2,SOX13,ZNF536,TRIB1,DUSP10,ADRA2A,CNKSR3,SPRED1,SPRED2,FGF2,PHLPP1,IGFBP4,FAS,SPRED3,SEMA6A,SH3RF1,SPRY4,RFFL,BID,NFE2L2,ARC,BAMBI,PRKCQ,HEG1,NTN1,FBN2,ADAMTS12,CHRDL1,PRR5L,FZD6,NKD1,TMEM131L,CD14,PDE4B,RAB7B,LTBP1,CADM4,PID1,DEPTOR,RBMS3,GIPR,GPR161,PDE10A,TRIM67,TRIM59,CTNND1,RGS5,RGS6,WIF1,GR…
1.YC/0.HA	Immature	Up	GO BP	GOBP_POSITIVE_REGULATION_OF_CELL_DIFFERENTIATION	GOBP_POSITIVE_REGULATION_OF_CELL_DIFFERENTIATION	1.28837	2.61023e-07	0.000145824	ETV5,SOX8,IGF1,ROR2,BCL6,STK3,TGFB2,SOX4,OLIG2,YAP1,DLX1,DNMT3B,FOXO3,CUX2,REST,SOX2,SOX10,TCF7L2,SOX13,TRIB1,DUSP10,PIK3R6,FGF2,NPNT,NTRK2,PLA2G5,NGF,LRP5,PDPN,CSPG5,BAMBI,EEF2K,NEDD9,RELN,NTN1,FBN2,SOX6,TRPM4,PROM1,NAPEPLD,MAN2A1,RAB7B,VEZF1,FAXDC2,EFEMP2,OLFM2,ADAMTS20,WIF1
1.YC/0.HA	Immature	Up	GO BP	GOBP_TUBE_MORPHOGENESIS	GOBP_TUBE_MORPHOGENESIS	1.28637	2.67812e-07	0.000145824	SOX8,HPGD,MFGE8,CHD7,STK3,TGFB2,WNT7A,CCDC134,FZD4,LGR5,QKI,SOX4,YAP1,HIPK2,PRRX1,SOX10,NR2E1,PIK3R6,SPRED1,FGF2,NPNT,NTRK2,SEMA6A,EXT1,LRP5,NFE2L2,COBL,PDPN,HEG1,SHROOM3,PTPRM,DCHS1,NTN1,FMN1,ADAMTS12,MTSS1,FZD6,NDNF,VAV3,VAV2,F3,RAPGEF3,VEZF1,SLC12A2,STAB1,TSPAN12,EFEMP2,MYLK
1.YC/0.HA	Immature	Up	GO BP	GOBP_NEUROGENESIS	GOBP_NEUROGENESIS	0.996891	5.30703e-07	0.000247059	EGFR,ETV5,ETV6,SOX8,ROR2,CHD7,BCL6,TGFB2,WNT7A,FZD4,NECTIN1,SOX4,OLIG2,YAP1,ARX,DLX1,DNMT3B,CUX2,HIPK2,PRRX1,REST,SOX2,SOX10,NR2E1,SOX13,ZNF536,DUSP10,ERBB4,NTRK2,SEMA6A,SH3RF1,TPBG,NGF,MYLIP,EXT1,NFE2L2,COBL,CSPG5,ARC,GRIP1,CNTN6,FRYL,EEF2K,OSTN,LAMA2,PRKCQ,RELN,DPYSL5,ZSWIM6,PTPRM,NTN4,LGR6,SGK1,DCHS1,CDHR1,NTN1,GAB2,SOX6,PROM1,MAN2A1,ASTN2,NKD1,LHX6,NDNF,TNFRSF21,NPY,GPR17,VSX1,NRBP2,TRIM67,MB…
1.YC/0.HA	Immature	Up	GO BP	GOBP_CELL_MIGRATION	GOBP_CELL_MIGRATION	1.01809	5.44482e-07	0.000247059	MERTK,EGFR,PATZ1,SOX8,IGF1,ROR2,TAC1,TGFB2,WNT7A,HDAC4,NOX4,ARX,FOXO3,MITF,NFATC2,SOX10,NR2E1,TRIB1,DUSP10,ADRA2A,SPRED1,ERBB4,FGF2,NTRK2,SEMA6A,SH3RF1,TPBG,RFFL,PHLDB2,EXT1,EPS8,LRP5,NFE2L2,PDPN,ARC,BAMBI,LAMA2,NEDD9,PRKCQ,RELN,PTPRM,NTN4,LGR6,SGK1,DCHS1,NTN1,SST,ADAMTS12,ITGA11,TRPM4,FSTL1,PRR5L,FUT8,GPC6,ASTN2,NKD1,LHX6,NDNF,VAV3,BIN2,VAV2,PDE4B,F3,SLC12A2,MYLK,MYO1C,SLC7A8,SLC7A10,PIK3C2G,TAF…
1.YC/0.HA	Immature	Up	GO BP	GOBP_TUBE_DEVELOPMENT	GOBP_TUBE_DEVELOPMENT	1.15462	7.88122e-07	0.000330102	EGFR,SOX8,HPGD,MFGE8,CHD7,STK3,TGFB2,WNT7A,CCDC134,FZD4,LGR5,QKI,SOX4,YAP1,HIPK2,PRRX1,SOX10,SREBF1,NR2E1,PIK3R6,SPRED1,FGF2,NPNT,NTRK2,SEMA6A,EXT1,LRP5,NFE2L2,COBL,PDPN,HEG1,SHROOM3,PTPRM,DCHS1,NTN1,FMN1,ADAMTS12,PROM1,MTSS1,MAN2A1,FZD6,NDNF,VAV3,VAV2,F3,RAPGEF3,VEZF1,SLC12A2,STAB1,TSPAN12,EFEMP2,MYLK,NPY,GPR161
1.YC/0.HA	Immature	Up	GO BP	GOBP_CAMERA_TYPE_EYE_DEVELOPMENT	GOBP_CAMERA_TYPE_EYE_DEVELOPMENT	1.71533	1.22037e-06	0.000474635	MERTK,NECTIN3,SOX8,CHD7,TGFB2,WNT7A,FZD4,NECTIN1,DLX1,HIPK2,MITF,NR2E1,SPRED1,SPRED2,FGF2,SPRED3,NTRK2,LRP5,PTPRM,FBN2,PROM1,MAN2A1,TSPAN12,SLC17A8,VSX1
1.YC/0.HA	Immature	Up	GO BP	GOBP_RETINA_MORPHOGENESIS_IN_CAMERA_TYPE_EYE	GOBP_RETINA_MORPHOGENESIS_IN_CAMERA_TYPE_EYE	2.93424	3.08639e-06	0.00105539	NECTIN3,SOX8,HIPK2,NTRK2,LRP5,PTPRM,PROM1,MAN2A1,TSPAN12,VSX1
1.YC/0.HA	Immature	Up	GO BP	GOBP_EXTERNAL_ENCAPSULATING_STRUCTURE_ORGANIZATION	GOBP_EXTERNAL_ENCAPSULATING_STRUCTURE_ORGANIZATION	1.5249	3.25881e-06	0.00105539	COL9A3,COL16A1,TGFB2,NR2E1,FGF2,NPNT,PHLDB1,PHLDB2,EXT1,PDPN,LAMA2,NTN4,COL5A2,COL6A1,HAPLN1,NCAN,FBN2,SH3PXD2B,ADAMTS12,ITGA11,NDNF,EFEMP2,ADAMTS17,TLL2,ADAMTS20,PAPLN,COL5A3,COL9A1
1.YC/0.HA	Immature	Up	GO BP	GOBP_REGULATION_OF_MULTICELLULAR_ORGANISMAL_DEVELOPMENT	GOBP_REGULATION_OF_MULTICELLULAR_ORGANISMAL_DEVELOPMENT	1.00569	3.48653e-06	0.00105539	ETV5,SOX8,IGF1,ROR2,CHD7,BCL6,TGFB2,WNT7A,SEPTIN7,SOX4,OLIG2,YAP1,DLX1,FOXO3,CUX2,HIPK2,MITF,NFATC2,REST,SOX10,NR2E1,TRPS1,SOX13,TRIB1,DUSP10,PIK3R6,SPRED1,SPRED2,ERBB4,FGF2,SPRED3,NTRK2,SEMA6A,SH3RF1,TPBG,NGF,PHLDB1,KAT2B,PHLDB2,NFE2L2,EEF2K,LAMA2,PRKCQ,RELN,PTPRM,NTN1,FBN2,SOX6,ADAMTS12,TRPM4,PROM1,MAN2A1,TMEM131L,TNFRSF21,F3,RAB7B,RAPGEF3,VEZF1,SLC12A2,FAXDC2,STAB1,TSPAN12,PRTG
1.YC/0.HA	Immature	Up	GO BP	GOBP_CIRCULATORY_SYSTEM_DEVELOPMENT	GOBP_CIRCULATORY_SYSTEM_DEVELOPMENT	1.08883	3.48889e-06	0.00105539	EGFR,HPGD,IGF1,MFGE8,CHD7,STK3,TGFB2,WNT7A,CCDC134,FZD4,QKI,SOX4,YAP1,HIPK2,NFATC2,PRRX1,REST,TCF7L2,NR2E1,PIK3R6,SPRED1,ERBB4,FGF2,NTRK2,PLCE1,SEMA6A,KAT2B,EXT1,LRP5,NFE2L2,PDPN,HEG1,PTPRM,DCHS1,SH3PXD2B,SOX6,NDNF,VAV3,VAV2,F3,RAPGEF3,VEZF1,SLC12A2,DIPK2A,STAB1,TSPAN12,EFEMP2,MYLK,SGCZ,TMEM65,SGCD,JPH2,LDB3,ADAP2
1.YC/0.HA	Immature	Up	GO BP	GOBP_INOSITOL_LIPID_MEDIATED_SIGNALING	GOBP_INOSITOL_LIPID_MEDIATED_SIGNALING	1.96497	3.88963e-06	0.00109405	EGFR,IGF1,ROR2,TGFB2,ERBB4,FGF2,FLT3,NTRK2,PLCE1,NGF,GAB2,NPR3,PRR5L,DIPK2A,PRR5,PLCB4,PIK3C2G,ADAP2
1.YC/0.HA	Immature	Up	GO BP	GOBP_CIRCULATORY_SYSTEM_PROCESS	GOBP_CIRCULATORY_SYSTEM_PROCESS	1.28247	6.94101e-06	0.00164321	CRH,EGFR,CHD7,TAC1,TAC3,TGFB2,HDAC4,NOX4,YAP1,SREBF1,ADRA1D,ADRA2A,EXT1,LRP5,HEG1,SGK1,NPR3,TRPM4,NOS1,NMU,SLC27A1,CYP2J2,SLC2A5,PDE4B,SLC12A2,NPY,SLC15A2,CHRM2,SGCZ,TMEM65,SLC7A8,CACNG5,KCNIP1,SGCD,SLC1A2,SLC6A1
1.YC/0.HA	Immature	Up	GO BP	GOBP_CANONICAL_WNT_SIGNALING_PATHWAY	GOBP_CANONICAL_WNT_SIGNALING_PATHWAY	1.56789	9.541e-06	0.00216461	EGFR,ROR2,STK3,WNT7A,FZD4,LGR5,SOX4,YAP1,MITF,SOX2,SOX10,TCF7L2,SOX13,IGFBP4,EXT1,LRP5,BAMBI,LGR6,TRPM4,FZD6,NKD1,TMEM131L,RBMS3,CTNND1
1.YC/0.HA	Immature	Up	GO BP	GOBP_SENSORY_ORGAN_MORPHOGENESIS	GOBP_SENSORY_ORGAN_MORPHOGENESIS	1.7294	1.11992e-05	0.00243918	NECTIN3,SOX8,ROR2,CHD7,NECTIN1,HIPK2,PRRX1,NTRK2,LRP5,PTPRM,NTN1,COL5A2,FBN2,PROM1,MAN2A1,FZD6,NKD1,TSPAN12,VSX1,KCNQ4
1.YC/0.HA	Immature	Up	GO BP	GOBP_LOCOMOTION	GOBP_LOCOMOTION	0.834416	1.28612e-05	0.0026048	MERTK,EGFR,PATZ1,SOX8,IGF1,ROR2,TAC1,TGFB2,WNT7A,FZD4,HDAC4,NECTIN1,NOX4,ARX,FOXO3,MITF,NFATC2,SOX10,NR2E1,TRIB1,DUSP10,ADRA2A,SPRED1,ERBB4,FGF2,NTRK2,SEMA6A,SH3RF1,TPBG,RFFL,PHLDB2,EXT1,EPS8,LRP5,NFE2L2,PDPN,ARC,BAMBI,CNTN6,LAMA2,NEDD9,PRKCQ,RELN,DPYSL5,ZSWIM6,PTPRM,NTN4,LGR6,SGK1,DCHS1,NTN1,GAB2,SST,ADAMTS12,ITGA11,TRPM4,FSTL1,PRR5L,FUT8,GPC6,ASTN2,NKD1,LHX6,NDNF,VAV3,BIN2,VAV2,PDE4B,F3,SLC12A2…
1.YC/0.HA	Immature	Up	GO BP	GOBP_GLIAL_CELL_DIFFERENTIATION	GOBP_GLIAL_CELL_DIFFERENTIATION	1.82664	1.29164e-05	0.0026048	EGFR,SOX8,ROR2,SOX4,OLIG2,DLX1,SOX2,SOX10,NR2E1,SOX13,DUSP10,NTRK2,CSPG5,LAMA2,RELN,SOX6,TNFRSF21,GPR17
1.YC/0.HA	Immature	Up	GO BP	GOBP_REGULATION_OF_TRANS_SYNAPTIC_SIGNALING	GOBP_REGULATION_OF_TRANS_SYNAPTIC_SIGNALING	1.42516	1.49551e-05	0.00274869	CRH,EGFR,ROR2,TAC1,WNT7A,CUX2,NR2E1,ADRA2A,GRM4,NTRK2,NGF,CSPG5,ARC,LAMA2,RELN,KMO,NMU,SLC12A2,CACNA1A,CACNG5,PLCB4,GRIN2C,SHISA8,CALB2,PXK,GRIK1,GRID2IP
1.YC/0.HA	Immature	Up	GO BP	GOBP_NEURON_DIFFERENTIATION	GOBP_NEURON_DIFFERENTIATION	0.921777	1.49799e-05	0.00274869	EGFR,ETV5,SOX8,ROR2,BCL6,TGFB2,WNT7A,FZD4,NECTIN1,SOX4,OLIG2,ARX,DLX1,DNMT3B,CUX2,HIPK2,PRRX1,REST,SOX2,NR2E1,ZNF536,ERBB4,NTRK2,SEMA6A,TPBG,NGF,MYLIP,EXT1,NFE2L2,COBL,ARC,GRIP1,CNTN6,FRYL,EEF2K,OSTN,LAMA2,PRKCQ,RELN,DPYSL5,ZSWIM6,PTPRM,NTN4,LGR6,SGK1,CDHR1,NTN1,GAB2,PROM1,NKD1,LHX6,NDNF,TNFRSF21,NPY,VSX1,NRBP2,TRIM67,MBOAT1,ANKS1A,ASAP1,CLMN,C1QL1,DENND5A
1.YC/0.HA	Immature	Up	GO BP	GOBP_TISSUE_REGENERATION	GOBP_TISSUE_REGENERATION	2.6354	1.54261e-05	0.00274869	IGF1,WNT7A,YAP1,SOX2,DUSP10,ERBB4,LGR6,TEC,TXK,NINJ2
1.YC/0.HA	Immature	Up	GO BP	GOBP_OSSIFICATION	GOBP_OSSIFICATION	1.45211	1.56491e-05	0.00274869	EGFR,SOX8,IGF1,ROR2,TAC1,TGFB2,HDAC4,YAP1,WWOX,REST,SOX2,NPNT,EXT1,LRP5,BAMBI,OSTN,DCHS1,COL5A2,COL6A1,FBN2,ITGA11,OSTF1,MN1,TRPM4,CHRDL1,MRC2
1.YC/0.HA	Immature	Up	GO BP	GOBP_NEGATIVE_REGULATION_OF_CELL_DIFFERENTIATION	GOBP_NEGATIVE_REGULATION_OF_CELL_DIFFERENTIATION	1.24029	1.71708e-05	0.00289886	EGFR,SOX8,IGF1,BCL6,TGFB2,WNT7A,HDAC4,OLIG2,YAP1,DLX1,NFATC2,REST,SOX2,SOX10,NR2E1,ZNF536,TRIB1,DUSP10,SPRED1,SPRED2,SPRED3,SEMA6A,SPRY4,LRP5,NFE2L2,BAMBI,OSTN,NTN1,COL5A2,SOX6,ADAMTS12,TRPM4,TMEM131L,TRIB2,ABCG1,PRTG
1.YC/0.HA	Immature	Up	GO BP	GOBP_NEURAL_RETINA_DEVELOPMENT	GOBP_NEURAL_RETINA_DEVELOPMENT	2.61107	1.75688e-05	0.00289886	SOX8,TGFB2,DLX1,HIPK2,NTRK2,PTPRM,PROM1,TSPAN12,SLC17A8,VSX1
1.YC/0.HA	Immature	Up	GO BP	GOBP_RESPONSE_TO_GROWTH_FACTOR	GOBP_RESPONSE_TO_GROWTH_FACTOR	1.17098	1.8977e-05	0.00303911	EGFR,HPGD,ROR2,TAC1,TGFB2,WNT7A,FZD4,NOX4,DLX1,HIPK2,HIVEP1,WWOX,SOX2,SPRED1,SPRED2,ERBB4,FGF2,FLT3,SPRED3,NTRK2,SEMA6A,SPRY4,NGF,EXT1,BAMBI,EEF2K,FBN2,SOX6,ADAMTS12,CHRDL1,NOS1,FSTL1,FUT8,NDNF,LTBP1,CADM4,TSPAN12,MYO1C,FGFRL1
1.YC/0.HA	Immature	Up	GO BP	GOBP_NEGATIVE_REGULATION_OF_DEVELOPMENTAL_PROCESS	GOBP_NEGATIVE_REGULATION_OF_DEVELOPMENTAL_PROCESS	1.08549	2.22025e-05	0.00341508	EGFR,SOX8,IGF1,BCL6,STK3,TGFB2,WNT7A,HDAC4,OLIG2,YAP1,DLX1,NFATC2,REST,SOX2,SOX10,NR2E1,ZNF536,TRIB1,DUSP10,SPRED1,SPRED2,SPRED3,SEMA6A,SPRY4,LRP5,NFE2L2,BAMBI,OSTN,PTPRM,NTN1,COL5A2,SOX6,ADAMTS12,TRPM4,NKD1,TMEM131L,TRIB2,RAPGEF3,SLC12A2,STAB1,ABCG1,TLL2,ASAP1,PRTG
1.YC/0.HA	Immature	Up	GO BP	GOBP_REGULATION_OF_PEPTIDE_SECRETION	GOBP_REGULATION_OF_PEPTIDE_SECRETION	1.56249	2.2579e-05	0.00341508	UNC13B,CRH,EGFR,IGF1,CHD7,TGFB2,SOX4,REST,SREBF1,TCF7L2,ADRA2A,LRP5,TRPM4,SYT9,NMU,ANO1,RAPGEF3,SLC12A2,GIPR,KCNS3,CACNA1A,ABCG1
1.YC/0.HA	Immature	Up	GO BP	GOBP_BIOLOGICAL_ADHESION	GOBP_BIOLOGICAL_ADHESION	0.880821	2.72907e-05	0.00393473	TESK2,MERTK,COL16A1,EGFR,NECTIN3,IGF1,MFGE8,BCL6,TGFB2,FZD4,NECTIN1,SOX4,PAWR,SOX2,SOX13,DUSP10,PIK3R6,NPNT,IRAK1,SEMA6A,TPBG,SPRY4,PHLDB2,EXT1,PDPN,CSPG5,CNTN6,LAMA2,NEDD9,PRKCQ,RELN,PTPRM,NTN4,DCHS1,CDHR1,NTN1,COL6A1,HAPLN1,NCAN,FMN1,HAPLN4,ADAMTS12,ITGA11,MTSS1,GPC6,ASTN2,NDNF,VAV3,FGL1,TMEM131L,TNFRSF21,CADM4,STAB1,EFEMP2,SIGLEC10,PIEZO1,FAT1,CTNND1,PCDH18,NINJ2,CERCAM,COL5A3,FGFRL1,CNTNAP3,P…
1.YC/0.HA	Immature	Up	GO BP	GOBP_MUSCLE_CELL_PROLIFERATION	GOBP_MUSCLE_CELL_PROLIFERATION	1.86698	2.746e-05	0.00393473	EGFR,HPGD,IGF1,TGFB2,VIP,HDAC4,YAP1,TCF7L2,TRIB1,ERBB4,FGF2,IRAK1,P2RY6,NPR3,DIPK2A,EFEMP2
1.YC/0.HA	Immature	Up	GO BP	GOBP_EYE_MORPHOGENESIS	GOBP_EYE_MORPHOGENESIS	1.99939	3.3788e-05	0.00438037	NECTIN3,SOX8,NECTIN1,HIPK2,NTRK2,LRP5,PTPRM,COL5A2,FBN2,PROM1,MAN2A1,NKD1,TSPAN12,VSX1
1.YC/0.HA	Immature	Up	GO BP	GOBP_POSITIVE_REGULATION_OF_SYNAPTIC_TRANSMISSION	GOBP_POSITIVE_REGULATION_OF_SYNAPTIC_TRANSMISSION	1.99939	3.3788e-05	0.00438037	CRH,EGFR,ROR2,TAC1,NR2E1,NTRK2,ARC,LAMA2,RELN,KMO,NMU,CACNG5,GRIN2C,CALB2
1.YC/0.HA	Immature	Up	GO BP	GOBP_POSITIVE_REGULATION_OF_SIGNALING	GOBP_POSITIVE_REGULATION_OF_SIGNALING	0.820354	4.37381e-05	0.00551702	CRH,EGFR,IGF1,ROR2,STK3,TAC1,TGFB2,WNT7A,FZD4,LGR5,SOX4,YAP1,CUX2,HIPK2,WWOX,PRRX1,SOX2,TCF7L2,NR2E1,ADORA2B,ADRA1D,PIK3R6,ADRA2A,SPRED1,SPRED2,ERBB4,FGF2,FLT3,NPNT,GRM4,IGFBP4,FAS,IRAK1,SPRED3,NTRK2,P2RY6,PLCE1,PLA2G5,SH3RF1,TPBG,NGF,KAT2B,BID,AFAP1L2,ARC,BAMBI,CNTN6,LAMA2,RELN,LGR6,EVC,MN1,TRPM4,KMO,NMU,PRR5L,ANO1,NKD1,TXK,CD14,F3,PLA2R1,PRR5,MYO1C,GPR17,GIPR,CACNG5,HIP1,ADAMTS20,GRIN2C,CALB2,N…
1.YC/0.HA	Immature	Up	GO BP	GOBP_POSITIVE_REGULATION_OF_MULTICELLULAR_ORGANISMAL_PROCESS	GOBP_POSITIVE_REGULATION_OF_MULTICELLULAR_ORGANISMAL_PROCESS	0.879883	4.4582e-05	0.00551702	UNC13B,CRH,EGFR,ETV5,SOX8,IGF1,ROR2,CHD7,BCL6,TAC1,TGFB2,TRPC3,VIP,WNT7A,HDAC4,ELOVL6,SOX4,OLIG2,YAP1,ARX,FOXO3,CUX2,HIPK2,REST,SOX10,TCF7L2,NR2E1,SOX13,TRIB1,DUSP10,ADRA1D,PIK3R6,ADRA2A,ERBB4,FGF2,IRAK1,NTRK2,TPBG,NGF,AFAP1L2,NFE2L2,PDPN,BAMBI,EEF2K,PRKCQ,RELN,HEG1,NTN1,FBN2,SOX6,TRPM4,NMU,SLC27A1,MAN2A1,POU2AF1,TXK,CD14,PDE4B,F3,RAB7B,RAPGEF3
1.YC/0.HA	Immature	Up	GO BP	GOBP_CELL_POPULATION_PROLIFERATION	GOBP_CELL_POPULATION_PROLIFERATION	0.788367	4.57882e-05	0.00554037	CRH,EGFR,ETV5,ETV6,SOX8,HPGD,IGF1,ROR2,BCL6,STK3,TAC1,TGFB2,VIP,WNT7A,LGR5,HDAC4,PEX2,SOX4,NOX4,YAP1,ARX,HIPK2,MITF,NFATC2,PAWR,PRRX1,REST,SOX2,SOX10,TCF7L2,NR2E1,TRIB1,DUSP10,ADRA1D,ADRA2A,ERBB4,FGF2,FLT3,IGFBP4,IRAK1,NTRK2,P2RY6,SH3RF1,TPBG,NGF,POC1B,KAT2B,EXT1,LRP5,BID,PDPN,BAMBI,PRKCQ,PTPRM,SGK1,DCHS1,NTN1,GAB2,SST,NPR3,MN1,TRPM4,MTSS1,TET1,FZD6,VAV3,FGL1,TMEM131L,TNFRSF21,F3,CADM4,DIPK2A,PID…
1.YC/0.HA	Immature	Up	GO BP	GOBP_CELL_SURFACE_RECEPTOR_SIGNALING_PATHWAY_INVOLVED_IN_CELL_CELL_SIGNALING	GOBP_CELL_SURFACE_RECEPTOR_SIGNALING_PATHWAY_INVOLVED_IN_CELL_CELL_SIGNALING	1.16391	5.46727e-05	0.00645833	UNC13B,EGFR,ROR2,STK3,WNT7A,FZD4,LGR5,SOX4,YAP1,CUX2,MITF,WWOX,SOX2,SOX10,TCF7L2,SOX13,IGFBP4,EXT1,LRP5,BAMBI,RELN,LGR6,TRPM4,GPC6,FZD6,NKD1,TMEM131L,TSPAN12,RBMS3,GRIN2C,CTNND1,WIF1,CHRNA2,CHRNA6
1.YC/0.HA	Immature	Up	GO BP	GOBP_REGULATION_OF_PEPTIDE_HORMONE_SECRETION	GOBP_REGULATION_OF_PEPTIDE_HORMONE_SECRETION	1.71012	5.57468e-05	0.00645833	CRH,EGFR,CHD7,SOX4,REST,SREBF1,TCF7L2,ADRA2A,LRP5,TRPM4,SYT9,NMU,ANO1,RAPGEF3,GIPR,KCNS3,CACNA1A
1.YC/0.HA	Immature	Up	GO BP	GOBP_RESPONSE_TO_ENDOGENOUS_STIMULUS	GOBP_RESPONSE_TO_ENDOGENOUS_STIMULUS	0.817149	5.77398e-05	0.00654985	ADCY7,COL16A1,CRH,EGFR,HPGD,IGF1,ROR2,PAPPA,TAC1,TGFB2,WNT7A,LGR5,HDAC4,BLM,NOX4,YAP1,DLX1,DNMT3B,HIPK2,HIVEP1,WWOX,REST,SOX10,SREBF1,NR2E1,ADRA2A,SPRED1,SPRED2,ERBB4,FGF2,FLT3,SPRED3,NTRK2,P2RY6,SPRY4,NGF,KAT2B,EXT1,LRP5,NFE2L2,BAMBI,EEF2K,OSTN,PRKCQ,SGK1,COL5A2,COL6A1,SST,FBN2,SOX6,ADAMTS12,TRPM4,CHRDL1,NOS1,SLC27A1,FSTL1,ANO1,FUT8,NDNF,PDE4B,LTBP1,RAPGEF3,PID1,MYO1C,CACNA1A,CHRM2,NPC1,RXRG,FGF…
1.YC/0.HA	Immature	Up	GO BP	GOBP_GLIOGENESIS	GOBP_GLIOGENESIS	1.5396	6.22453e-05	0.00691685	EGFR,ETV5,SOX8,ROR2,TGFB2,SOX4,OLIG2,DLX1,SOX2,SOX10,NR2E1,SOX13,DUSP10,NTRK2,CSPG5,LAMA2,RELN,SOX6,TNFRSF21,GPR17
1.YC/0.HA	Immature	Up	GO BP	GOBP_REGULATION_OF_ANATOMICAL_STRUCTURE_MORPHOGENESIS	GOBP_REGULATION_OF_ANATOMICAL_STRUCTURE_MORPHOGENESIS	0.981727	6.58091e-05	0.00708735	SOX8,ROR2,BCL6,TGFB2,WNT7A,FZD4,SEPTIN7,CUX2,HIPK2,NR2E1,PIK3R6,SPRED1,FGF2,NTRK2,SEMA6A,SPRY4,NGF,PHLDB1,PHLDB2,EPS8,NFE2L2,PDPN,CSPG5,FGD5,ARC,GRIP1,BAMBI,EEF2K,OSTN,MYO10,NEDD9,RELN,SHROOM3,PTPRM,NTN4,NTN1,ADAMTS12,GPC6,FZD6,NKD1,F3,RAPGEF3,SLC12A2,PID1,STAB1,TSPAN12
1.YC/0.HA	Immature	Up	GO BP	GOBP_BLOOD_VESSEL_MORPHOGENESIS	GOBP_BLOOD_VESSEL_MORPHOGENESIS	1.17347	6.63829e-05	0.00708735	HPGD,MFGE8,CHD7,TGFB2,WNT7A,CCDC134,FZD4,QKI,SOX4,YAP1,HIPK2,PRRX1,NR2E1,PIK3R6,SPRED1,FGF2,NTRK2,SEMA6A,LRP5,NFE2L2,HEG1,PTPRM,NDNF,VAV3,VAV2,F3,RAPGEF3,VEZF1,SLC12A2,STAB1,TSPAN12,EFEMP2,MYLK
1.YC/0.HA	Immature	Up	GO BP	GOBP_MULTICELLULAR_ORGANISMAL_RESPONSE_TO_STRESS	GOBP_MULTICELLULAR_ORGANISMAL_RESPONSE_TO_STRESS	2.50509	7.59305e-05	0.00780078	CRH,MORC1,TAC1,NR2E1,ADRA2A,EXT1,RELN,NOS1,ASIC4
1.YC/0.HA	Immature	Up	GO BP	GOBP_NEGATIVE_REGULATION_OF_RESPONSE_TO_STIMULUS	GOBP_NEGATIVE_REGULATION_OF_RESPONSE_TO_STIMULUS	0.799665	0.000107432	0.0108327	EGFR,IGF1,ROR2,BCL6,STK3,TGFB2,FZD4,YAP1,DLX1,HIPK2,PAWR,WWOX,OTUD7B,SOX2,SOX10,TCF7L2,SOX13,ZNF536,TRIB1,DUSP10,ADRA2A,CNKSR3,SPRED1,SPRED2,FGF2,PHLPP1,IGFBP4,FAS,SPRED3,SEMA6A,SH3RF1,SPRY4,RFFL,PHLDB2,BID,NFE2L2,BAMBI,PRKCQ,HEG1,NTN1,FBN2,ADAMTS12,CHRDL1,PRR5L,FZD6,NKD1,TMEM131L,CD14,PDE4B,RAB7B,LTBP1,SLC12A2,CADM4,PID1,DEPTOR,SIGLEC10,RBMS3,GPR17,GIPR,GPR161,PDE10A,TRIM67,TRIM59,CTNND1,RGS5,RG…
1.YC/0.HA	Immature	Up	GO BP	GOBP_CELL_MORPHOGENESIS	GOBP_CELL_MORPHOGENESIS	0.933651	0.000112479	0.0111354	MERTK,EGFR,BCL6,TGFB2,WNT7A,FZD4,SEPTIN7,NECTIN1,NOX4,YAP1,ARX,CUX2,NR2E1,NTRK2,SEMA6A,TPBG,SPRY4,NGF,EXT1,EPS8,COBL,PDPN,CSPG5,FGD5,ARC,GRIP1,BAMBI,CNTN6,FRYL,EEF2K,OSTN,LAMA2,MYO10,NEDD9,PRKCQ,RELN,DPYSL5,HEG1,SHROOM3,ZSWIM6,PTPRM,NTN4,LGR6,SGK1,DCHS1,CDHR1,NTN1,GAB2
1.YC/0.HA	Immature	Up	GO BP	GOBP_HORMONE_TRANSPORT	GOBP_HORMONE_TRANSPORT	1.41952	0.000123867	0.0119165	CRH,EGFR,CHD7,TAC1,VIP,FZD4,SOX4,REST,SREBF1,TCF7L2,ADRA2A,LRP5,TRPM4,SYT9,NMU,ANO1,RAPGEF3,GIPR,KCNS3,CACNA1A,SLC7A8
1.YC/0.HA	Immature	Up	GO BP	GOBP_SIGNAL_RELEASE	GOBP_SIGNAL_RELEASE	1.22833	0.000124745	0.0119165	UNC13B,CRH,EGFR,CHD7,TAC1,VIP,WNT7A,FZD4,SOX4,REST,SREBF1,TCF7L2,ADRA2A,GRM4,LRP5,CSPG5,TRPM4,SLC32A1,SYT9,RPH3A,GAD2,KMO,NMU,ANO1,RAPGEF3,GIPR,KCNS3,CACNA1A
1.YC/0.HA	Immature	Up	GO BP	GOBP_CELL_FATE_COMMITMENT	GOBP_CELL_FATE_COMMITMENT	1.54477	0.00013307	0.0123546	SOX8,ROR2,WNT7A,OLIG2,ARX,DLX1,MITF,PRRX1,SOX2,TCF7L2,NR2E1,SOX13,ERBB4,FGF2,EXT1,PDPN,SOX6,MIAT
1.YC/0.HA	Immature	Up	GO BP	GOBP_REGULATION_OF_MAPK_CASCADE	GOBP_REGULATION_OF_MAPK_CASCADE	1.07743	0.000133869	0.0123546	EGFR,IGF1,ROR2,STK3,TGFB2,WNT7A,FZD4,HIPK2,SOX2,DUSP10,ADORA2B,ADRA1D,PIK3R6,ADRA2A,CNKSR3,SPRED1,SPRED2,ERBB4,FGF2,FLT3,PHLPP1,NPNT,GRM4,IGFBP4,FAS,IRAK1,SPRED3,NTRK2,P2RY6,PLCE1,PLA2G5,SEMA6A,SH3RF1,TPBG,LBH,SPRY4
1.YC/0.HA	Immature	Up	GO BP	GOBP_PEPTIDE_HORMONE_SECRETION	GOBP_PEPTIDE_HORMONE_SECRETION	1.53837	0.000140028	0.0125265	CRH,EGFR,CHD7,VIP,SOX4,REST,SREBF1,TCF7L2,ADRA2A,LRP5,TRPM4,SYT9,NMU,ANO1,RAPGEF3,GIPR,KCNS3,CACNA1A
1.YC/0.HA	Immature	Up	GO BP	GOBP_ENZYME_LINKED_RECEPTOR_PROTEIN_SIGNALING_PATHWAY	GOBP_ENZYME_LINKED_RECEPTOR_PROTEIN_SIGNALING_PATHWAY	0.914778	0.000142444	0.0125265	MERTK,EGFR,HPGD,IGF1,ROR2,TGFB2,FZD4,DLX1,HIPK2,HIVEP1,SREBF1,ADRA2A,SPRED1,SPRED2,ERBB4,FGF2,FLT3,IGFBP4,SPRED3,NTRK2,PLCE1,SEMA6A,SPRY4,NGF,EXT1,AFAP1L2,BAMBI,NEDD9,PRKCQ,GAB2,FBN2,ADAMTS12,CHRDL1,MTSS1,FSTL1,FUT8,VAV3,BLNK,VAV2,F3,LTBP1,CADM4,PID1,TSPAN12,MYO1C,HIP1,ANKS1A,LIFR,FGFRL1
1.YC/0.HA	Immature	Up	GO BP	GOBP_SYNAPTIC_TRANSMISSION_GLUTAMATERGIC	GOBP_SYNAPTIC_TRANSMISSION_GLUTAMATERGIC	2.21242	0.000142634	0.0125265	UNC13B,EGFR,ROR2,GRM4,EXT1,RELN,KMO,CACNG5,SLC17A8,GRIK1
1.YC/0.HA	Immature	Up	GO BP	GOBP_OSTEOBLAST_DIFFERENTIATION	GOBP_OSTEOBLAST_DIFFERENTIATION	1.6423	0.000148638	0.0128465	SOX8,IGF1,HDAC4,YAP1,WWOX,REST,SOX2,NPNT,LRP5,BAMBI,OSTN,COL6A1,FBN2,ITGA11,TRPM4,MRC2
1.YC/0.HA	Immature	Up	GO BP	GOBP_VASCULATURE_DEVELOPMENT	GOBP_VASCULATURE_DEVELOPMENT	1.05409	0.000155342	0.0132162	HPGD,MFGE8,CHD7,TGFB2,WNT7A,CCDC134,FZD4,QKI,SOX4,YAP1,HIPK2,NFATC2,PRRX1,TCF7L2,NR2E1,PIK3R6,SPRED1,FGF2,NTRK2,SEMA6A,LRP5,NFE2L2,PDPN,HEG1,PTPRM,NDNF,VAV3,VAV2,F3,RAPGEF3,VEZF1,SLC12A2,STAB1,TSPAN12,EFEMP2,MYLK
1.YC/0.HA	Immature	Up	GO BP	GOBP_SMOOTH_MUSCLE_CELL_PROLIFERATION	GOBP_SMOOTH_MUSCLE_CELL_PROLIFERATION	1.9374	0.00017092	0.0143179	EGFR,HPGD,IGF1,VIP,HDAC4,TCF7L2,TRIB1,FGF2,IRAK1,P2RY6,NPR3,EFEMP2
1.YC/0.HA	Immature	Up	GO BP	GOBP_REGULATION_OF_SYSTEM_PROCESS	GOBP_REGULATION_OF_SYSTEM_PROCESS	1.11476	0.000185751	0.0152963	UNC13B,CRH,EGFR,IGF1,TAC1,TGFB2,TRPC3,VIP,WNT7A,HDAC4,FOXO3,CUX2,SOX10,SREBF1,ADRA1D,ADRA2A,PLCE1,RELN,SGK1,TRPM4,NOS1,NMU,CYP2J2,TNFRSF21,PDE4B,CHRM2,TMEM65,CACNG5,KCNIP1,TAFA4,ABCG8
1.YC/0.HA	Immature	Up	GO BP	GOBP_OLIGODENDROCYTE_DIFFERENTIATION	GOBP_OLIGODENDROCYTE_DIFFERENTIATION	2.15853	0.000188219	0.0152963	SOX8,OLIG2,DLX1,SOX10,SOX13,DUSP10,NTRK2,SOX6,TNFRSF21,GPR17
1.YC/0.HA	Immature	Up	GO BP	GOBP_PEPTIDE_SECRETION	GOBP_PEPTIDE_SECRETION	1.28072	0.0001915	0.0153341	UNC13B,CRH,EGFR,IGF1,CHD7,TGFB2,VIP,SOX4,REST,SREBF1,TCF7L2,ADRA2A,LRP5,TRPM4,SYT9,NMU,ANO1,RAPGEF3,SLC12A2,GIPR,KCNS3,CACNA1A,OLFM2,ABCG1
1.YC/0.HA	Immature	Up	GO BP	GOBP_TISSUE_MORPHOGENESIS	GOBP_TISSUE_MORPHOGENESIS	1.06314	0.00022583	0.0178209	SOX8,ROR2,CHD7,STK3,TGFB2,WNT7A,FZD4,LGR5,SOX4,YAP1,SOX10,FGF2,NPNT,PHLDB2,EXT1,LRP5,COBL,PDPN,HEG1,SHROOM3,NTN4,DCHS1,NTN1,FMN1,ADAMTS12,FRAS1,MTSS1,GPC6,ASTN2,FZD6,NKD1,EFEMP2,MYLK
1.YC/0.HA	Immature	Up	GO BP	GOBP_HEART_PROCESS	GOBP_HEART_PROCESS	1.42807	0.000232323	0.0180714	TAC1,TGFB2,HDAC4,NOX4,YAP1,SREBF1,ADRA1D,EXT1,TRPM4,NOS1,NMU,CYP2J2,PDE4B,CHRM2,SGCZ,TMEM65,CACNG5,KCNIP1,SGCD
1.YC/0.HA	Immature	Up	GO BP	GOBP_APPENDAGE_MORPHOGENESIS	GOBP_APPENDAGE_MORPHOGENESIS	1.87534	0.000245746	0.0188463	ROR2,CHD7,TGFB2,WNT7A,SOX4,PRRX1,EXT1,LRP5,FBN2,FMN1,FRAS1,FZD6
1.YC/0.HA	Immature	Up	GO BP	GOBP_REGULATION_OF_CELLULAR_RESPONSE_TO_VASCULAR_ENDOTHELIAL_GROWTH_FACTOR_STIMULUS	GOBP_REGULATION_OF_CELLULAR_RESPONSE_TO_VASCULAR_ENDOTHELIAL_GROWTH_FACTOR_STIMULUS	3.41756	0.000254445	0.0192424	SEMA6A,ADAMTS12,CADM4,TSPAN12,MYO1C
1.YC/0.HA	Immature	Up	GO BP	GOBP_REGULATION_OF_HORMONE_SECRETION	GOBP_REGULATION_OF_HORMONE_SECRETION	1.45754	0.000264203	0.0196674	CRH,EGFR,CHD7,TAC1,SOX4,REST,SREBF1,TCF7L2,ADRA2A,LRP5,TRPM4,SYT9,NMU,ANO1,RAPGEF3,GIPR,KCNS3,CACNA1A
1.YC/0.HA	Immature	Up	GO BP	GOBP_VERY_LONG_CHAIN_FATTY_ACID_METABOLIC_PROCESS	GOBP_VERY_LONG_CHAIN_FATTY_ACID_METABOLIC_PROCESS	2.96345	0.000267288	0.0196674	ABCD2,SLC27A6,ELOVL2,PEX2,ELOVL5,ELOVL6
1.YC/0.HA	Immature	Up	GO BP	GOBP_CAMERA_TYPE_EYE_MORPHOGENESIS	GOBP_CAMERA_TYPE_EYE_MORPHOGENESIS	1.95457	0.000284438	0.0206502	NECTIN3,SOX8,NECTIN1,HIPK2,NTRK2,LRP5,PTPRM,PROM1,MAN2A1,TSPAN12,VSX1
1.YC/0.HA	Immature	Up	GO BP	GOBP_MORPHOGENESIS_OF_AN_EPITHELIUM	GOBP_MORPHOGENESIS_OF_AN_EPITHELIUM	1.11247	0.000315023	0.0225526	SOX8,ROR2,STK3,TGFB2,WNT7A,FZD4,LGR5,SOX4,YAP1,SOX10,FGF2,NPNT,PHLDB2,EXT1,LRP5,COBL,PDPN,SHROOM3,NTN4,DCHS1,NTN1,FMN1,ADAMTS12,FRAS1,MTSS1,GPC6,ASTN2,FZD6,NKD1
1.YC/0.HA	Immature	Up	GO BP	GOBP_POSITIVE_REGULATION_OF_CELLULAR_COMPONENT_ORGANIZATION	GOBP_POSITIVE_REGULATION_OF_CELLULAR_COMPONENT_ORGANIZATION	0.855032	0.000318926	0.0225526	UNC13B,COL16A1,IGF1,ROR2,BCL6,TAC1,TGFB2,WNT7A,FZD4,HDAC4,SEPTIN7,NOX4,DNMT3B,CUX2,NFATC2,SREBF1,GPSM2,NTRK2,PLCE1,PLA2G5,TPBG,NGF,PHLDB1,PHLDB2,EPS8,LRP5,BID,NFE2L2,COBL,PDPN,GRIP1,EEF2K,PRKCQ,RELN,NTN1,FMN1,NOS1,SYT9,TET1,NDNF,CD14,RAPGEF3,EFEMP2,MYO1C,HIP1,TRIM67,PIEZO1,ANK1,FCHSD2,ASAP1
1.YC/0.HA	Immature	Up	GO BP	GOBP_TRANSMEMBRANE_RECEPTOR_PROTEIN_TYROSINE_KINASE_SIGNALING_PATHWAY	GOBP_TRANSMEMBRANE_RECEPTOR_PROTEIN_TYROSINE_KINASE_SIGNALING_PATHWAY	0.997409	0.000326528	0.0227942	MERTK,EGFR,IGF1,ROR2,FZD4,SREBF1,ADRA2A,SPRED1,SPRED2,ERBB4,FGF2,FLT3,IGFBP4,NTRK2,PLCE1,SEMA6A,SPRY4,NGF,EXT1,AFAP1L2,NEDD9,PRKCQ,GAB2,ADAMTS12,MTSS1,VAV3,BLNK,VAV2,F3,CADM4,PID1,TSPAN12,MYO1C,HIP1,ANKS1A,FGFRL1
1.YC/0.HA	Immature	Up	GO BP	GOBP_POSITIVE_REGULATION_OF_TRANSPORT	GOBP_POSITIVE_REGULATION_OF_TRANSPORT	0.92866	0.0003411	0.02351	MERTK,UNC13B,AZIN2,CRH,EGFR,IGF1,MFGE8,TAC1,TGFB2,TRPC3,VIP,SOX4,TCF7L2,ADRA2A,CNKSR3,P2RY6,PLA2G5,MTCL1,BID,NFE2L2,ARC,EEF2K,RELN,SGK1,GAB2,TRPM4,NOS1,SYT9,KMO,NMU,PRR5L,ANO1,CD14,PLA2R1,RAPGEF3,SLC12A2,MYLK,MYO1C,GIPR,ABCG1,HIP1,JPH2
1.YC/0.HA	Immature	Up	GO BP	GOBP_REGULATION_OF_WNT_SIGNALING_PATHWAY	GOBP_REGULATION_OF_WNT_SIGNALING_PATHWAY	1.28292	0.000351652	0.0237056	EGFR,ROR2,STK3,FZD4,LGR5,SOX4,YAP1,WWOX,SOX2,SOX10,TCF7L2,SOX13,IGFBP4,BAMBI,LGR6,TRPM4,FZD6,NKD1,TMEM131L,RBMS3,CTNND1,WIF1
1.YC/0.HA	Immature	Up	GO BP	GOBP_ANATOMICAL_STRUCTURE_FORMATION_INVOLVED_IN_MORPHOGENESIS	GOBP_ANATOMICAL_STRUCTURE_FORMATION_INVOLVED_IN_MORPHOGENESIS	0.858099	0.000352645	0.0237056	SOX8,MFGE8,ROR2,BCL6,STK3,TGFB2,WNT7A,CCDC134,NECTIN1,SOX4,YAP1,HIPK2,NFATC2,SOX2,NR2E1,PIK3R6,SPRED1,FGF2,SEMA6A,PHLDB1,PHLDB2,EXT1,NFE2L2,COBL,PDPN,SHROOM3,PTPRM,DCHS1,COL5A2,COL6A1,FBN2,FMN1,NOS1,PROM1,TET1,WDR74,FZD6,NKD1,NDNF,VAV3,VAV2,F3,RAPGEF3,VEZF1,SLC12A2,STAB1,TSPAN12,LDB3
1.YC/0.HA	Immature	Up	GO BP	GOBP_CELL_CELL_SIGNALING_BY_WNT	GOBP_CELL_CELL_SIGNALING_BY_WNT	1.12543	0.000379381	0.0251268	EGFR,ROR2,STK3,WNT7A,FZD4,LGR5,SOX4,YAP1,MITF,WWOX,SOX2,SOX10,TCF7L2,SOX13,IGFBP4,EXT1,LRP5,BAMBI,LGR6,TRPM4,GPC6,FZD6,NKD1,TMEM131L,TSPAN12,RBMS3,CTNND1,WIF1
1.YC/0.HA	Immature	Up	GO BP	GOBP_GLYCOPROTEIN_BIOSYNTHETIC_PROCESS	GOBP_GLYCOPROTEIN_BIOSYNTHETIC_PROCESS	1.32651	0.000383016	0.0251268	IGF1,GAL3ST1,TMEM165,PAWR,TCF7L2,EXT1,CSPG5,NCAN,ST8SIA6,TET1,FUT8,MAN2A1,MAGT1,GBGT1,GALNT7,HS3ST5,NPC1,POGLUT3,TMTC2,GALNT10,GALNT4
1.YC/0.HA	Immature	Up	GO BP	GOBP_WOUND_HEALING	GOBP_WOUND_HEALING	1.1162	0.000401695	0.0260385	MERTK,EGFR,IGF1,TGFB2,TRPC3,WNT7A,YAP1,DUSP10,PIK3R6,ADRA2A,FGF2,PHLDB2,EXT1,NFE2L2,PDPN,PRKCQ,FZD6,NDNF,VAV3,TEC,TXK,VAV2,F3,SLC12A2,CADM4,MYLK,DOCK6,DCBLD2
1.YC/0.HA	Immature	Up	GO BP	GOBP_TRANSMEMBRANE_TRANSPORT	GOBP_TRANSMEMBRANE_TRANSPORT	0.737374	0.000415441	0.0263797	AZIN2,CRH,IGF1,CHD7,TRPC3,ABCD2,PEX2,SLC39A11,TMEM165,TCN2,ADRA2A,FGF2,P2RY6,NFE2L2,PDPN,ARC,OSTN,RELN,SGK1,TRPM4,NOS1,SLC32A1,SLC27A1,ANO1,SLC2A5,MAGT1,PDE4B,SLC12A2,PID1,NETO2,SLC15A2,KCNS3,CACNA1A,ABCG1,SLC7A8,CACNG5,KCNIP1,SLC1A2,SLC6A1,SLC38A11,SLC17A8,SLC7A10,SLC37A4,TRPM6,SLC12A7,SLC5A8,KCNH4,SLC13A5,GRIN2C,KCNJ16,SHISA8,KCNK9,ASIC4,JPH2,KCNQ4,PIEZO1,ANO4,ANO8,SV2C,GRIK1,CHRNA2,CHRNA6,ABCG…
1.YC/0.HA	Immature	Up	GO BP	GOBP_REGULATION_OF_CELLULAR_RESPONSE_TO_GROWTH_FACTOR_STIMULUS	GOBP_REGULATION_OF_CELLULAR_RESPONSE_TO_GROWTH_FACTOR_STIMULUS	1.39822	0.000416648	0.0263797	FZD4,DLX1,HIPK2,SPRED1,SPRED2,FGF2,SPRED3,SEMA6A,SPRY4,BAMBI,FBN2,ADAMTS12,CHRDL1,FSTL1,LTBP1,CADM4,TSPAN12,MYO1C
1.YC/0.HA	Immature	Up	GO BP	GOBP_POSITIVE_REGULATION_OF_SECRETION	GOBP_POSITIVE_REGULATION_OF_SECRETION	1.35151	0.000428225	0.0266962	UNC13B,CRH,EGFR,IGF1,TAC1,TGFB2,VIP,SOX4,TCF7L2,GAB2,TRPM4,SYT9,KMO,NMU,ANO1,PLA2R1,SLC12A2,GIPR,ABCG1
1.YC/0.HA	Immature	Up	GO BP	GOBP_FEAR_RESPONSE	GOBP_FEAR_RESPONSE	2.81608	0.000431454	0.0266962	CRH,MORC1,NR2E1,ADRA2A,EXT1,ASIC4
1.YC/0.HA	Immature	Up	GO BP	GOBP_SKELETAL_SYSTEM_DEVELOPMENT	GOBP_SKELETAL_SYSTEM_DEVELOPMENT	1.14934	0.000457128	0.027967	IGF1,ROR2,CHD7,TGFB2,WNT7A,HDAC4,SOX4,DLX1,WWOX,PRRX1,TRPS1,FGF2,EXT1,LRP5,DCHS1,COL5A2,HAPLN1,NCAN,EVC,FBN2,SH3PXD2B,FMN1,HAPLN4,NPR3,SOX6,ADAMTS12,PAPSS2
1.YC/0.HA	Immature	Up	GO BP	GOBP_REGULATION_OF_PHOSPHATIDYLINOSITOL_3_KINASE_SIGNALING	GOBP_REGULATION_OF_PHOSPHATIDYLINOSITOL_3_KINASE_SIGNALING	1.85982	0.000473955	0.0286743	EGFR,IGF1,ROR2,TGFB2,ERBB4,FGF2,FLT3,NTRK2,PRR5L,DIPK2A,PRR5
1.YC/0.HA	Immature	Up	GO BP	GOBP_REGULATION_OF_INTRACELLULAR_SIGNAL_TRANSDUCTION	GOBP_REGULATION_OF_INTRACELLULAR_SIGNAL_TRANSDUCTION	0.702792	0.000503911	0.0300892	CRH,EGFR,IGF1,ROR2,BCL6,STK3,TGFB2,WNT7A,FZD4,BLM,HIPK2,OTUD7B,SOX2,TCF7L2,DUSP10,ADORA2B,ADRA1D,PIK3R6,ADRA2A,CNKSR3,SPRED1,SPRED2,ERBB4,FGF2,FLT3,PHLPP1,NPNT,GRM4,IGFBP4,FAS,IRAK1,SPRED3,NTRK2,P2RY6,PLCE1,PLA2G5,SEMA6A,SH3RF1,TPBG,LBH,SPRY4,NGF,RFFL,EPS8,BID,NFE2L2,RELN,HEG1,PRR5L,VAV3,VAV2,CD14,F3,PLA2R1,CADM4,DIPK2A,PRR5,DEPTOR,SLC15A2,GPR17,GIPR,PDE10A,HIP1,TRIM67,TRIM59,CYTH4,ARHGAP31,EPM2A…
1.YC/0.HA	Immature	Up	GO BP	GOBP_EMBRYO_DEVELOPMENT	GOBP_EMBRYO_DEVELOPMENT	0.855602	0.000508395	0.0300892	SOX8,IGF1,ROR2,CHD7,STK3,TGFB2,WNT7A,TFEB,CCDC134,SEPTIN7,SOX4,YAP1,DLX1,HIPK2,PRRX1,OTUD7B,SOX2,SOX10,ERBB4,FGF2,PHLDB1,PHLDB2,EXT1,LRP5,NFE2L2,COBL,LAMA2,HEG1,SHROOM3,DCHS1,NTN1,COL5A2,COL6A1,FBN2,ST8SIA6,FRAS1,TET1,PLPP4,FUT8,MAN2A1,WDR74,FZD6,NKD1,GPR161,KCNQ4
1.YC/0.HA	Immature	Up	GO BP	MANGO	MANGO neurogenesis	1.18708	0.000539992	0.0316156	IGF1,CHD7,TAC1,WNT7A,SOX4,OLIG2,REST,SOX2,NR2E1,ADRA2A,FGF2,FAS,NTRK2,NGF,ARC,RELN,NOS1,PROM1,TET1,SLC12A2,NPY,SLC1A2,CALB2,NPAS3
1.YC/0.HA	Immature	Up	GO BP	GOBP_REGULATION_OF_TRANSFERASE_ACTIVITY	GOBP_REGULATION_OF_TRANSFERASE_ACTIVITY	0.845839	0.000546111	0.0316338	MERTK,ADCY7,EGFR,IGF1,ROR2,STK3,TGFB2,FZD4,BLM,USP44,CDC14B,NOX4,TRIB1,DUSP10,ADORA2B,PIK3R6,ADRA2A,SPRED1,SPRED2,ERBB4,FGF2,FLT3,GRM4,IRAK1,SPRED3,NTRK2,PLCE1,SPRY4,NGF,KAT2B,LRP5,AFAP1L2,NEDD9,PRKCQ,RELN,HEG1,SLC27A1,VAV3,VAV2,TRIB2,DIPK2A,PPP2R5A,PRR5,DEPTOR,SERINC5
1.YC/0.HA	Immature	Up	GO BP	GOBP_APPENDAGE_DEVELOPMENT	GOBP_APPENDAGE_DEVELOPMENT	1.65038	0.00055656	0.0318932	ROR2,CHD7,TGFB2,WNT7A,SOX4,PRRX1,KAT2B,EXT1,LRP5,FBN2,FMN1,FRAS1,FZD6
1.YC/0.HA	Immature	Up	GO BP	GOBP_RESPONSE_TO_WOUNDING	GOBP_RESPONSE_TO_WOUNDING	1.01276	0.000562897	0.0318932	MERTK,EGFR,IGF1,TGFB2,TRPC3,WNT7A,YAP1,SOX2,DUSP10,PIK3R6,ADRA2A,FGF2,PHLDB2,EXT1,NFE2L2,PDPN,PRKCQ,FZD6,NDNF,VAV3,TEC,TXK,VAV2,F3,SLC12A2,CADM4,MYLK,SIGLEC10,GIPR,GRIN2C,DOCK6,DCBLD2
1.YC/0.HA	Immature	Up	GO BP	GOBP_POSITIVE_REGULATION_OF_DNA_DAMAGE_RESPONSE_SIGNAL_TRANSDUCTION_BY_P53_CLASS_MEDIATOR	GOBP_POSITIVE_REGULATION_OF_DNA_DAMAGE_RESPONSE_SIGNAL_TRANSDUCTION_BY_P53_CLASS_MEDIATOR	3.72086	0.000568162	0.0318932	SPRED1,SPRED2,SPRED3,PLA2R1
1.YC/0.HA	Immature	Up	GO BP	GOBP_NEGATIVE_REGULATION_OF_WNT_SIGNALING_PATHWAY	GOBP_NEGATIVE_REGULATION_OF_WNT_SIGNALING_PATHWAY	1.50774	0.000579961	0.0321251	ROR2,STK3,FZD4,WWOX,SOX2,SOX10,TCF7L2,SOX13,IGFBP4,FZD6,NKD1,TMEM131L,RBMS3,CTNND1,WIF1
1.YC/0.HA	Immature	Up	GO BP	GOBP_SOMATIC_STEM_CELL_POPULATION_MAINTENANCE	GOBP_SOMATIC_STEM_CELL_POPULATION_MAINTENANCE	2.23526	0.000584093	0.0321251	WNT7A,SOX4,YAP1,REST,SOX2,NR2E1,FGF2,LRP5
1.YC/0.HA	Immature	Up	GO BP	GOBP_POSITIVE_REGULATION_OF_PHOSPHATIDYLINOSITOL_3_KINASE_SIGNALING	GOBP_POSITIVE_REGULATION_OF_PHOSPHATIDYLINOSITOL_3_KINASE_SIGNALING	2.0573	0.000615907	0.0335362	IGF1,ROR2,TGFB2,ERBB4,FGF2,FLT3,NTRK2,PRR5L,PRR5
1.YC/0.HA	Immature	Up	GO BP	GOBP_NEGATIVE_REGULATION_OF_MULTICELLULAR_ORGANISMAL_PROCESS	GOBP_NEGATIVE_REGULATION_OF_MULTICELLULAR_ORGANISMAL_PROCESS	0.854293	0.00063602	0.0342636	MERTK,ADCY7,CRH,EGFR,PATZ1,SOX8,IGF1,BCL6,STK3,TAC1,TGFB2,WNT7A,ABCD2,DLX1,OTUD7B,REST,SOX10,NR2E1,TRIB1,DUSP10,SPRED1,SPRED2,FGF2,SPRED3,SEMA6A,MYLIP,PTPRM,NTN1,NPR3,SOX6,ADAMTS12,TRPM4,NMU,TMEM131L,TNFRSF21,PDE4B,TRIB2,LAPTM4B,CARD18,SLC12A2,STAB1,HS3ST5,ABCG8,PRTG
1.YC/0.HA	Immature	Up	GO BP	GOBP_SULFUR_COMPOUND_BIOSYNTHETIC_PROCESS	GOBP_SULFUR_COMPOUND_BIOSYNTHETIC_PROCESS	1.55528	0.000641853	0.0342636	ELOVL2,ELOVL5,ELOVL6,BHMT2,MTAP,EXT1,NFE2L2,CSPG5,NCAN,PAPSS2,ACSS1,GCDH,SCD5,GSTM5
1.YC/0.HA	Immature	Up	GO BP	GOBP_RENAL_TUBULE_DEVELOPMENT	GOBP_RENAL_TUBULE_DEVELOPMENT	2.02107	0.000726094	0.037758	SOX8,LGR5,YAP1,FGF2,NPNT,DCHS1,FMN1,PROM1,MTSS1
1.YC/0.HA	Immature	Up	GO BP	GOBP_PHOSPHATIDYLINOSITOL_3_KINASE_SIGNALING	GOBP_PHOSPHATIDYLINOSITOL_3_KINASE_SIGNALING	1.68283	0.000740324	0.037758	EGFR,IGF1,ROR2,TGFB2,ERBB4,FGF2,FLT3,NTRK2,PRR5L,DIPK2A,PRR5,PIK3C2G
1.YC/0.HA	Immature	Up	GO BP	GOBP_ORGAN_GROWTH	GOBP_ORGAN_GROWTH	1.68283	0.000740324	0.037758	IGF1,STK3,TGFB2,YAP1,ARX,ERBB4,FGF2,EXT1,OSTN,HEG1,EVC,DIPK2A
1.YC/0.HA	Immature	Up	GO BP	GOBP_POSITIVE_REGULATION_OF_ION_TRANSPORT	GOBP_POSITIVE_REGULATION_OF_ION_TRANSPORT	0.991362	0.000742423	0.037758	UNC13B,AZIN2,CRH,EGFR,IGF1,TAC1,TGFB2,TRPC3,VIP,SOX4,TCF7L2,ADRA2A,CNKSR3,P2RY6,MTCL1,BID,NFE2L2,ARC,RELN,TRPM4,NOS1,KMO,NMU,PRR5L,ANO1,PLA2R1,RAPGEF3,SLC12A2,MYLK,MYO1C,GIPR,ABCG1,JPH2
1.YC/0.HA	Immature	Up	GO BP	GOBP_FOREBRAIN_GENERATION_OF_NEURONS	GOBP_FOREBRAIN_GENERATION_OF_NEURONS	2.37983	0.000745024	0.037758	ARX,DLX1,NR2E1,ERBB4,ZSWIM6,LHX6,NDNF
1.YC/0.HA	Immature	Up	GO BP	GOBP_REGULATION_OF_CELL_DEVELOPMENT	GOBP_REGULATION_OF_CELL_DEVELOPMENT	1.10453	0.000748919	0.037758	ETV5,SOX8,IGF1,CHD7,WNT7A,HDAC4,OLIG2,YAP1,DLX1,CUX2,REST,SOX10,NR2E1,TRIB1,DUSP10,NTRK2,SEMA6A,SPRY4,NGF,CSPG5,EEF2K,NEDD9,RELN,NTN1,MAN2A1,PRTG
1.YC/0.HA	Immature	Up	GO BP	GOBP_CARBOHYDRATE_DERIVATIVE_BIOSYNTHETIC_PROCESS	GOBP_CARBOHYDRATE_DERIVATIVE_BIOSYNTHETIC_PROCESS	0.981713	0.000767667	0.0380218	ADCY7,IGF1,GAL3ST1,ELOVL2,ELOVL5,ELOVL6,TMEM165,MTAP,PAWR,TCF7L2,EXT1,CSPG5,NCAN,PAPSS2,ST8SIA6,TET1,FUT8,MAN2A1,GPC6,MAGT1,PID1,GBGT1,GALNT7,HS3ST5,NPC1,ACSS1,GCDH,CTPS2,SCD5,POGLUT3,TMTC2,GALNT10,GALNT4
1.YC/0.HA	Immature	Up	GO BP	GOBP_REGULATION_OF_PROTEIN_SERINE_THREONINE_KINASE_ACTIVITY	GOBP_REGULATION_OF_PROTEIN_SERINE_THREONINE_KINASE_ACTIVITY	1.09795	0.000775451	0.0380218	EGFR,IGF1,ROR2,STK3,FZD4,BLM,TRIB1,DUSP10,ADORA2B,PIK3R6,ADRA2A,SPRED1,SPRED2,FGF2,FLT3,GRM4,IRAK1,SPRED3,PLCE1,SPRY4,KAT2B,LRP5,HEG1,SLC27A1,TRIB2,DIPK2A
1.YC/0.HA	Immature	Up	GO BP	GOBP_POSITIVE_REGULATION_OF_PEPTIDE_SECRETION	GOBP_POSITIVE_REGULATION_OF_PEPTIDE_SECRETION	1.67225	0.000785495	0.0380218	UNC13B,CRH,EGFR,IGF1,TGFB2,SOX4,TCF7L2,TRPM4,NMU,ANO1,GIPR,ABCG1
1.YC/0.HA	Immature	Up	GO BP	GOBP_AMINO_ACID_TRANSPORT	GOBP_AMINO_ACID_TRANSPORT	1.67225	0.000785495	0.0380218	UNC13B,NTRK2,PDPN,SLC32A1,KMO,SLC12A2,SLC7A8,SLC1A2,SLC6A1,SLC38A11,SLC17A8,SLC7A10
1.YC/0.HA	Immature	Up	GO BP	GOBP_GLYCOPROTEIN_METABOLIC_PROCESS	GOBP_GLYCOPROTEIN_METABOLIC_PROCESS	1.1724	0.000789065	0.0380218	IGF1,GAL3ST1,TMEM165,PAWR,TCF7L2,EXT1,CSPG5,NCAN,ADAMTS12,ST8SIA6,TET1,FUT8,MAN2A1,NDNF,MAGT1,GBGT1,GALNT7,HS3ST5,NPC1,POGLUT3,TMTC2,GALNT10,GALNT4
1.YC/0.HA	Immature	Up	GO BP	GOBP_OLFACTORY_LOBE_DEVELOPMENT	GOBP_OLFACTORY_LOBE_DEVELOPMENT	2.98135	0.000830871	0.039685	CHD7,ARX,NR2E1,ERBB4,EXT1
1.YC/0.HA	Immature	Up	GO BP	GOBP_REGULATION_OF_EPITHELIAL_TO_MESENCHYMAL_TRANSITION	GOBP_REGULATION_OF_EPITHELIAL_TO_MESENCHYMAL_TRANSITION	1.98572	0.000851848	0.0403332	TGFB2,TCF7L2,SPRED1,SPRED2,SPRED3,PHLDB1,PHLDB2,PDPN,BAMBI
1.YC/0.HA	Immature	Up	GO BP	GOBP_REGULATION_OF_MAP_KINASE_ACTIVITY	GOBP_REGULATION_OF_MAP_KINASE_ACTIVITY	1.29901	0.000866451	0.0406709	EGFR,IGF1,ROR2,FZD4,TRIB1,DUSP10,ADORA2B,PIK3R6,ADRA2A,SPRED1,SPRED2,FGF2,FLT3,GRM4,IRAK1,SPRED3,PLCE1,SPRY4,TRIB2
1.YC/0.HA	Immature	Up	GO BP	GOBP_POSITIVE_REGULATION_OF_CELL_POPULATION_PROLIFERATION	GOBP_POSITIVE_REGULATION_OF_CELL_POPULATION_PROLIFERATION	0.859426	0.000875654	0.0407516	CRH,EGFR,ETV5,SOX8,HPGD,IGF1,BCL6,TAC1,TGFB2,VIP,WNT7A,HDAC4,SOX4,YAP1,HIPK2,NFATC2,PRRX1,SOX10,TCF7L2,NR2E1,ADRA1D,ADRA2A,ERBB4,FGF2,FLT3,IRAK1,NTRK2,P2RY6,LRP5,BAMBI,PRKCQ,NTN1,GAB2,TRPM4,TET1,VAV3,F3,PID1,ACER3,LIFR,CDCA7L
1.YC/0.HA	Immature	Up	GO BP	GOBP_AORTA_MORPHOGENESIS	GOBP_AORTA_MORPHOGENESIS	2.91999	0.000981919	0.0447794	CHD7,TGFB2,SOX4,EFEMP2,MYLK
1.YC/0.HA	Immature	Up	GO BP	GOBP_LIPID_LOCALIZATION	GOBP_LIPID_LOCALIZATION	1.05906	0.000988419	0.0447794	UNC13B,CRH,TAC1,FZD4,ABCD2,SLC27A6,SREBF1,NTRK2,PLA2G5,KMO,SLC27A1,PLA2R1,SLC12A2,ABCG1,SLC1A2,SLC17A8,LCAT,NPC1,OSBPL3,LIPC,GLTP,SLC5A8,ANO4,ABCG8,PLIN3,PITPNC1
1.YC/0.HA	Immature	Up	GO BP	GOBP_NEURON_DEVELOPMENT	GOBP_NEURON_DEVELOPMENT	0.78155	0.000995097	0.0447794	EGFR,ROR2,TGFB2,WNT7A,FZD4,NECTIN1,ARX,CUX2,PRRX1,NR2E1,NTRK2,SEMA6A,TPBG,NGF,MYLIP,EXT1,NFE2L2,COBL,ARC,GRIP1,CNTN6,FRYL,EEF2K,OSTN,LAMA2,PRKCQ,RELN,DPYSL5,ZSWIM6,PTPRM,NTN4,LGR6,SGK1,CDHR1,NTN1,GAB2,LHX6,NDNF,TNFRSF21,NPY,VSX1,TRIM67,MBOAT1,ANKS1A,ASAP1,CLMN,C1QL1,DENND5A
1.YC/0.HA	Immature	Up	GO BP	GOBP_NEGATIVE_REGULATION_OF_CANONICAL_WNT_SIGNALING_PATHWAY	GOBP_NEGATIVE_REGULATION_OF_CANONICAL_WNT_SIGNALING_PATHWAY	1.5486	0.00101733	0.0452162	ROR2,STK3,FZD4,SOX2,SOX10,TCF7L2,SOX13,IGFBP4,FZD6,NKD1,TMEM131L,RBMS3,CTNND1
1.YC/0.HA	Immature	Up	GO BP	GOBP_PROTEIN_PHOSPHORYLATION	GOBP_PROTEIN_PHOSPHORYLATION	0.687514	0.00102141	0.0452162	TESK2,MERTK,ADCY7,CRH,EGFR,IGF1,ROR2,STK3,TGFB2,FZD4,BLM,STK33,NOX4,HIPK2,TRIB1,DUSP10,ADORA2B,PIK3R6,ADRA2A,CNKSR3,SPRED1,SPRED2,ERBB4,FGF2,FLT3,GRM4,FAS,IRAK1,SPRED3,NTRK2,PLCE1,MAPK4,SPRY4,NGF,KAT2B,LRP5,AFAP1L2,EEF2K,NEDD9,PRKCQ,RELN,HEG1,SGK1,NOS1,SLC27A1,PRR5L,TEC,TXK,TRIB2,RAPGEF3,FAXDC2,CADM4,DIPK2A,PID1,PPP2R5A,PRR5,DEPTOR,MYLK,TRPM6,STK32A,ERG,NRBP2,STK32B,PRKG2
1.YC/0.HA	Immature	Up	GO BP	GOBP_REGULATION_OF_OSTEOBLAST_DIFFERENTIATION	GOBP_REGULATION_OF_OSTEOBLAST_DIFFERENTIATION	1.81373	0.00104987	0.0461013	IGF1,HDAC4,YAP1,REST,NPNT,LRP5,BAMBI,OSTN,FBN2,TRPM4
1.YC/0.HA	Immature	Up	GO BP	GOBP_REGULATION_OF_NEUROGENESIS	GOBP_REGULATION_OF_NEUROGENESIS	1.20614	0.00107738	0.0469307	ETV5,SOX8,CHD7,WNT7A,OLIG2,YAP1,DLX1,CUX2,REST,SOX10,NR2E1,DUSP10,NTRK2,SEMA6A,NGF,EEF2K,RELN,NTN1,MAN2A1,PRTG
1.YC/0.HA	Immature	Up	GO BP	GOBP_LENS_DEVELOPMENT_IN_CAMERA_TYPE_EYE	GOBP_LENS_DEVELOPMENT_IN_CAMERA_TYPE_EYE	2.08023	0.00110488	0.0475924	NECTIN3,WNT7A,NECTIN1,HIPK2,SPRED1,SPRED2,FGF2,SPRED3
1.YC/0.HA	Immature	Up	GO BP	GOBP_REGULATION_OF_ION_TRANSPORT	GOBP_REGULATION_OF_ION_TRANSPORT	0.744671	0.00111005	0.0475924	UNC13B,AZIN2,CRH,EGFR,IGF1,CHD7,TAC1,TGFB2,TRPC3,VIP,SOX4,REST,SREBF1,TCF7L2,ADRA2A,CNKSR3,P2RY6,MTCL1,LRP5,BID,NFE2L2,ARC,OSTN,RELN,TRPM4,NOS1,SYT9,KMO,NMU,PRR5L,ANO1,PLPP4,PDE4B,PLA2R1,RAPGEF3,SLC12A2,PID1,MYLK,NETO2,MYO1C,GIPR,KCNS3,CACNA1A,ABCG1,CACNG5,KCNIP1,PRKG2,KCNH4,KCNJ16,SHISA8,JPH2,KCNQ4,PXK,ABCG8
1.YC/0.HA	Immature	Up	GO BP	GOBP_FATTY_ACID_DERIVATIVE_BIOSYNTHETIC_PROCESS	GOBP_FATTY_ACID_DERIVATIVE_BIOSYNTHETIC_PROCESS	2.26636	0.00113103	0.0481129	HPGD,ELOVL2,ELOVL5,ELOVL6,LTC4S,GCDH,SCD5
1.YC/0.HA	Immature	Up	GO BP	GOBP_POSITIVE_REGULATION_OF_SYNAPTIC_TRANSMISSION_GLUTAMATERGIC	GOBP_POSITIVE_REGULATION_OF_SYNAPTIC_TRANSMISSION_GLUTAMATERGIC	2.86052	0.00115244	0.0484403	EGFR,ROR2,RELN,KMO,CACNG5
1.YC/0.HA	Immature	Up	GO BP	GOBP_NEGATIVE_REGULATION_OF_CELLULAR_RESPONSE_TO_GROWTH_FACTOR_STIMULUS	GOBP_NEGATIVE_REGULATION_OF_CELLULAR_RESPONSE_TO_GROWTH_FACTOR_STIMULUS	1.91754	0.00115652	0.0484403	DLX1,HIPK2,FGF2,SEMA6A,SPRY4,BAMBI,ADAMTS12,CHRDL1,CADM4
1.YC/0.HA	Immature	Up	GO BP	GOBP_CATION_TRANSPORT	GOBP_CATION_TRANSPORT	0.764339	0.00117634	0.0488946	CRH,CHD7,TRPC3,VIP,SLC39A11,TMEM165,NECTIN1,TCN2,ADRA2A,CNKSR3,FGF2,P2RY6,ARC,RELN,SGK1,TRPM4,NOS1,SLC32A1,SYT9,ANO1,PLPP4,MAGT1,PDE4B,SLC12A2,MYLK,NETO2,SLC15A2,KCNS3,CACNA1A,SLC7A8,CACNG5,KCNIP1,SLC6A1,SLC38A11,SLC17A8,SLC7A10,TRPM6,SLC12A7,SLC5A8,KCNH4,SLC13A5,GRIN2C,KCNJ16,SHISA8,KCNK9,ASIC4,JPH2,KCNQ4,PIEZO1
1.YC/0.HA	Immature	Up	GO BP	GOBP_REGULATION_OF_ANION_TRANSPORT	GOBP_REGULATION_OF_ANION_TRANSPORT	0.866169	0.00119953	0.0491178	UNC13B,AZIN2,CRH,EGFR,IGF1,CHD7,TAC1,TGFB2,VIP,SOX4,REST,SREBF1,TCF7L2,ADRA2A,MTCL1,LRP5,BID,NFE2L2,ARC,OSTN,TRPM4,NOS1,SYT9,KMO,NMU,PRR5L,ANO1,PLA2R1,RAPGEF3,SLC12A2,PID1,MYO1C,GIPR,KCNS3,CACNA1A,ABCG1,PRKG2,ABCG8
1.YC/0.HA	Immature	Up	GO BP	GOBP_LONG_CHAIN_FATTY_ACID_METABOLIC_PROCESS	GOBP_LONG_CHAIN_FATTY_ACID_METABOLIC_PROCESS	1.78607	0.00119975	0.0491178	HPGD,QKI,SLC27A6,ELOVL2,ELOVL5,ELOVL6,SLC27A1,CYP2J2,LTC4S,FADS2
1.YC/0.HA	Immature	Up	GO BP	GOBP_REGULATION_OF_SECRETION	GOBP_REGULATION_OF_SECRETION	0.964159	0.00123001	0.0498804	UNC13B,CRH,EGFR,IGF1,CHD7,TAC1,TGFB2,VIP,WNT7A,SOX4,REST,SREBF1,TCF7L2,ADRA2A,LRP5,CSPG5,SGK1,GAB2,TRPM4,SYT9,KMO,NMU,ANO1,PLA2R1,RAPGEF3,SLC12A2,GIPR,KCNS3,CACNA1A,ABCG1
1.YC/0.HA	Immature	Up	GO BP	GOBP_FATTY_ACID_BIOSYNTHETIC_PROCESS	GOBP_FATTY_ACID_BIOSYNTHETIC_PROCESS	1.59024	0.0012367	0.0498804	HPGD,QKI,ABCD2,ELOVL2,ELOVL5,ELOVL6,LTC4S,FADS2,ACSS1,LIPC,SCD5,LPGAT1
1.YC/0.HA	Immature	Up	GO BP	GOBP_ARTERY_MORPHOGENESIS	GOBP_ARTERY_MORPHOGENESIS	2.23927	0.00124846	0.0499842	HPGD,CHD7,TGFB2,SOX4,PRRX1,EFEMP2,MYLK
1.YC/0.HA	Immature	Up	GO BP	GOBP_GROWTH	GOBP_GROWTH	0.832917	0.00126345	0.0501906	EGFR,IGF1,CHD7,BCL6,STK3,TGFB2,WNT7A,YAP1,ARX,SOX2,SOX10,DUSP10,ERBB4,FGF2,IGFBP4,PLCE1,SEMA6A,NGF,EXT1,COBL,CSPG5,OSTN,NEDD9,PRKCQ,HEG1,LGR6,SGK1,NTN1,EVC,FMN1,NKD1,TEC,TXK,DIPK2A,TLL2,IL17RB,NINJ2,GNG4,RASGRP2,DCBLD2
1.YC/0.HA	Immature	Up	GO BP	GOBP_FATTY_ACYL_COA_BIOSYNTHETIC_PROCESS	GOBP_FATTY_ACYL_COA_BIOSYNTHETIC_PROCESS	2.80402	0.00134393	0.051533	ELOVL2,ELOVL5,ELOVL6,GCDH,SCD5
1.YC/0.HA	Immature	Up	GO BP	GOBP_LENS_FIBER_CELL_DIFFERENTIATION	GOBP_LENS_FIBER_CELL_DIFFERENTIATION	2.80402	0.00134393	0.051533	WNT7A,SPRED1,SPRED2,FGF2,SPRED3
1.YC/0.HA	Immature	Up	GO BP	GOBP_ORGANIC_ACID_TRANSPORT	GOBP_ORGANIC_ACID_TRANSPORT	1.21392	0.00136712	0.0520556	UNC13B,ABCD2,SLC27A6,NTRK2,PLA2G5,PDPN,SLC32A1,KMO,SLC27A1,PLA2R1,SLC12A2,SLC7A8,SLC1A2,SLC6A1,SLC38A11,SLC17A8,SLC7A10,SLC5A8,SLC13A5
1.YC/0.HA	Immature	Up	GO BP	GOBP_REGULATION_OF_PROTEIN_KINASE_ACTIVITY	GOBP_REGULATION_OF_PROTEIN_KINASE_ACTIVITY	0.866975	0.0013802	0.0521889	ADCY7,EGFR,IGF1,ROR2,STK3,TGFB2,FZD4,BLM,NOX4,TRIB1,DUSP10,ADORA2B,PIK3R6,ADRA2A,SPRED1,SPRED2,FGF2,FLT3,GRM4,IRAK1,SPRED3,NTRK2,PLCE1,SPRY4,NGF,KAT2B,LRP5,AFAP1L2,NEDD9,RELN,HEG1,SLC27A1,TRIB2,DIPK2A,PRR5,DEPTOR
1.YC/0.HA	Immature	Up	GO BP	GOBP_REGULATION_OF_PROTEIN_PHOSPHORYLATION	GOBP_REGULATION_OF_PROTEIN_PHOSPHORYLATION	0.745262	0.00139889	0.0525308	ADCY7,CRH,EGFR,IGF1,ROR2,STK3,TGFB2,FZD4,BLM,NOX4,HIPK2,TRIB1,DUSP10,ADORA2B,PIK3R6,ADRA2A,CNKSR3,SPRED1,SPRED2,ERBB4,FGF2,FLT3,GRM4,FAS,IRAK1,SPRED3,NTRK2,PLCE1,SPRY4,NGF,KAT2B,LRP5,AFAP1L2,EEF2K,NEDD9,RELN,HEG1,NOS1,SLC27A1,PRR5L,TEC,TRIB2,RAPGEF3,FAXDC2,CADM4,DIPK2A,PID1,PPP2R5A,PRR5,DEPTOR
1.YC/0.HA	Immature	Up	GO BP	GOBP_NEGATIVE_REGULATION_OF_PEPTIDYL_THREONINE_PHOSPHORYLATION	GOBP_NEGATIVE_REGULATION_OF_PEPTIDYL_THREONINE_PHOSPHORYLATION	3.27294	0.00148077	0.0548489	SPRED1,SPRED2,SPRED3,CADM4
1.YC/0.HA	Immature	Up	GO BP	GOBP_NEGATIVE_REGULATION_OF_NEURON_DIFFERENTIATION	GOBP_NEGATIVE_REGULATION_OF_NEURON_DIFFERENTIATION	2.18657	0.00151182	0.0554006	SOX8,OLIG2,DLX1,REST,SOX2,NR2E1,ZNF536
1.YC/0.HA	Immature	Up	GO BP	GOBP_REGENERATION	GOBP_REGENERATION	1.47877	0.00152417	0.0554006	EGFR,IGF1,WNT7A,YAP1,PRRX1,SOX2,DUSP10,ERBB4,FLT3,LGR6,TEC,TXK,NINJ2
1.YC/0.HA	Immature	Up	GO BP	GOBP_POSITIVE_REGULATION_OF_INTRACELLULAR_SIGNAL_TRANSDUCTION	GOBP_POSITIVE_REGULATION_OF_INTRACELLULAR_SIGNAL_TRANSDUCTION	0.787789	0.00153071	0.0554006	CRH,EGFR,IGF1,ROR2,STK3,TGFB2,WNT7A,FZD4,HIPK2,SOX2,TCF7L2,ADORA2B,ADRA1D,PIK3R6,ADRA2A,SPRED1,SPRED2,ERBB4,FGF2,FLT3,NPNT,GRM4,IGFBP4,IRAK1,SPRED3,NTRK2,P2RY6,PLCE1,PLA2G5,SH3RF1,TPBG,NGF,BID,RELN,PRR5L,CD14,F3,PLA2R1,PRR5,GPR17,GIPR,HIP1,GPR137C
1.YC/0.HA	Immature	Up	GO BP	GOBP_LIPID_EXPORT_FROM_CELL	GOBP_LIPID_EXPORT_FROM_CELL	1.9986	0.00153801	0.0554006	UNC13B,CRH,TAC1,FZD4,NTRK2,KMO,SLC12A2,SLC1A2
1.YC/0.HA	Immature	Up	GO BP	GOBP_INSULIN_SECRETION	GOBP_INSULIN_SECRETION	1.41236	0.00154654	0.0554006	CRH,SOX4,REST,SREBF1,TCF7L2,ADRA2A,LRP5,TRPM4,SYT9,ANO1,RAPGEF3,GIPR,KCNS3,CACNA1A
1.YC/0.HA	Immature	Up	GO BP	GOBP_UNSATURATED_FATTY_ACID_BIOSYNTHETIC_PROCESS	GOBP_UNSATURATED_FATTY_ACID_BIOSYNTHETIC_PROCESS	2.412	0.00158736	0.0564913	ABCD2,ELOVL2,ELOVL5,ELOVL6,FADS2,SCD5
1.YC/0.HA	Immature	Up	GO BP	GOBP_NEUROTRANSMITTER_TRANSPORT	GOBP_NEUROTRANSMITTER_TRANSPORT	1.40479	0.00161833	0.0572196	UNC13B,WNT7A,ADRA2A,GRM4,CSPG5,NOS1,SLC32A1,SYT9,RPH3A,GAD2,KMO,SLC6A1,SLC17A8,SV2C
1.YC/0.HA	Immature	Up	GO BP	GOBP_PHOSPHOLIPASE_C_ACTIVATING_G_PROTEIN_COUPLED_RECEPTOR_SIGNALING_PATHWAY	GOBP_PHOSPHOLIPASE_C_ACTIVATING_G_PROTEIN_COUPLED_RECEPTOR_SIGNALING_PATHWAY	1.83634	0.00165523	0.0581466	VIP,ADRA1D,ADRA2A,P2RY6,PLCE1,NPR3,ANO1,GPR17,CHRM2
1.YC/0.HA	Immature	Up	GO BP	GOBP_CEREBRAL_CORTEX_NEURON_DIFFERENTIATION	GOBP_CEREBRAL_CORTEX_NEURON_DIFFERENTIATION	3.18011	0.0018118	0.0632389	ARX,DLX1,NR2E1,LHX6
1.YC/0.HA	Immature	Up	GO BP	GOBP_POSITIVE_REGULATION_OF_MAPK_CASCADE	GOBP_POSITIVE_REGULATION_OF_MAPK_CASCADE	0.99924	0.00191785	0.0665139	EGFR,IGF1,ROR2,STK3,TGFB2,WNT7A,FZD4,HIPK2,SOX2,ADORA2B,ADRA1D,PIK3R6,ADRA2A,ERBB4,FGF2,FLT3,NPNT,GRM4,IGFBP4,IRAK1,NTRK2,P2RY6,PLCE1,PLA2G5,SH3RF1,TPBG
1.YC/0.HA	Immature	Up	GO BP	GOBP_EPITHELIAL_TUBE_MORPHOGENESIS	GOBP_EPITHELIAL_TUBE_MORPHOGENESIS	1.2023	0.00196235	0.0672014	SOX8,STK3,TGFB2,LGR5,SOX4,YAP1,FGF2,NPNT,EXT1,LRP5,COBL,SHROOM3,DCHS1,NTN1,FMN1,ADAMTS12,MTSS1,FZD6
1.YC/0.HA	Immature	Up	GO BP	GOBP_REGULATION_OF_HORMONE_LEVELS	GOBP_REGULATION_OF_HORMONE_LEVELS	0.993082	0.00198073	0.0674068	CRH,EGFR,SOX8,CHD7,TAC1,VIP,FZD4,SOX4,REST,SREBF1,TCF7L2,ADRA2A,NGF,LRP5,TRPM4,SYT9,NMU,ANO1,RAPGEF3,GIPR,KCNS3,CACNA1A,SLC7A8,HSD17B7,HSD17B6,PCSK1
1.YC/0.HA	Immature	Up	GO BP	GOBP_MONOCARBOXYLIC_ACID_BIOSYNTHETIC_PROCESS	GOBP_MONOCARBOXYLIC_ACID_BIOSYNTHETIC_PROCESS	1.36772	0.00202027	0.0683252	HPGD,QKI,ABCD2,ELOVL2,ELOVL5,ELOVL6,KMO,LTC4S,FADS2,ACSS1,OSBPL3,LIPC,SCD5,LPGAT1
1.YC/0.HA	Immature	Up	GO BP	GOBP_CEREBRAL_CORTEX_GABAERGIC_INTERNEURON_DIFFERENTIATION	GOBP_CEREBRAL_CORTEX_GABAERGIC_INTERNEURON_DIFFERENTIATION	3.95451	0.00204555	0.0687533	ARX,DLX1,LHX6
1.YC/0.HA	Immature	Up	GO BP	GOBP_SMALL_MOLECULE_BIOSYNTHETIC_PROCESS	GOBP_SMALL_MOLECULE_BIOSYNTHETIC_PROCESS	0.898209	0.00210014	0.0701549	HPGD,QKI,ABCD2,ELOVL2,ELOVL5,ELOVL6,BHMT2,MTAP,REST,SREBF1,FGF2,P2RY6,PLA2G5,KAT2B,KMO,LTC4S,FADS2,PDE4B,SERINC5,ABCG1,SLC37A4,HSD17B7,ACER3,ACSS1,SPTLC2,OSBPL3,LIPC,SCD5,LPGAT1,PDE10A,PDE7B,ENTPD3
1.YC/0.HA	Immature	Up	GO BP	GOBP_ACIDIC_AMINO_ACID_TRANSPORT	GOBP_ACIDIC_AMINO_ACID_TRANSPORT	2.08674	0.00216693	0.0710502	UNC13B,NTRK2,KMO,SLC12A2,SLC1A2,SLC6A1,SLC17A8
1.YC/0.HA	Immature	Up	GO BP	GOBP_NUCLEOSIDE_BISPHOSPHATE_BIOSYNTHETIC_PROCESS	GOBP_NUCLEOSIDE_BISPHOSPHATE_BIOSYNTHETIC_PROCESS	2.08674	0.00216693	0.0710502	ELOVL2,ELOVL5,ELOVL6,PAPSS2,ACSS1,GCDH,SCD5
1.YC/0.HA	Immature	Up	GO BP	GOBP_LINOLEIC_ACID_METABOLIC_PROCESS	GOBP_LINOLEIC_ACID_METABOLIC_PROCESS	3.09262	0.0021908	0.0710502	ELOVL2,ELOVL5,CYP2J2,FADS2
1.YC/0.HA	Immature	Up	GO BP	GOBP_MAINTENANCE_OF_CELL_NUMBER	GOBP_MAINTENANCE_OF_CELL_NUMBER	1.56466	0.00219218	0.0710502	IGF1,WNT7A,SOX4,YAP1,PRRX1,REST,SOX2,NR2E1,FGF2,LRP5,TET1
1.YC/0.HA	Immature	Up	GO BP	GOBP_PROTEOGLYCAN_METABOLIC_PROCESS	GOBP_PROTEOGLYCAN_METABOLIC_PROCESS	1.9027	0.00225753	0.0724045	IGF1,TCF7L2,EXT1,CSPG5,NCAN,ADAMTS12,NDNF,HS3ST5
1.YC/0.HA	Immature	Up	GO BP	GOBP_CELL_PART_MORPHOGENESIS	GOBP_CELL_PART_MORPHOGENESIS	0.881856	0.00226056	0.0724045	EGFR,WNT7A,FZD4,NECTIN1,ARX,CUX2,NR2E1,NTRK2,SEMA6A,TPBG,NGF,EXT1,COBL,PDPN,CSPG5,ARC,GRIP1,CNTN6,EEF2K,OSTN,LAMA2,PRKCQ,RELN,DPYSL5,ZSWIM6,PTPRM,NTN4,LGR6,SGK1,NTN1,GAB2,PID1
1.YC/0.HA	Immature	Up	GO BP	GOBP_NEPHRON_EPITHELIUM_DEVELOPMENT	GOBP_NEPHRON_EPITHELIUM_DEVELOPMENT	1.75959	0.00231324	0.0736586	SOX8,YAP1,FGF2,NPNT,EXT1,DCHS1,FMN1,PROM1,MTSS1
1.YC/0.HA	Immature	Up	GO BP	GOBP_REGULATION_OF_SYNAPTIC_TRANSMISSION_GLUTAMATERGIC	GOBP_REGULATION_OF_SYNAPTIC_TRANSMISSION_GLUTAMATERGIC	2.06281	0.00236058	0.0742969	EGFR,ROR2,GRM4,RELN,KMO,CACNG5,GRIK1
1.YC/0.HA	Immature	Up	GO BP	GOBP_FATTY_ACID_TRANSPORT	GOBP_FATTY_ACID_TRANSPORT	1.54342	0.0024375	0.076277	UNC13B,ABCD2,SLC27A6,NTRK2,PLA2G5,KMO,SLC27A1,PLA2R1,SLC1A2,SLC17A8,SLC5A8
1.YC/0.HA	Immature	Up	GO BP	GOBP_NEGATIVE_REGULATION_OF_ERK1_AND_ERK2_CASCADE	GOBP_NEGATIVE_REGULATION_OF_ERK1_AND_ERK2_CASCADE	2.03927	0.0025673	0.0798798	DUSP10,CNKSR3,SPRED1,SPRED2,SPRED3,SEMA6A,SPRY4
1.YC/0.HA	Immature	Up	GO BP	GOBP_CAMP_METABOLIC_PROCESS	GOBP_CAMP_METABOLIC_PROCESS	3.01019	0.0026211	0.0804041	ADCY7,PDE4B,PDE10A,PDE7B
1.YC/0.HA	Immature	Up	GO BP	GOBP_POSITIVE_REGULATION_OF_SIGNAL_TRANSDUCTION_BY_P53_CLASS_MEDIATOR	GOBP_POSITIVE_REGULATION_OF_SIGNAL_TRANSDUCTION_BY_P53_CLASS_MEDIATOR	3.01019	0.0026211	0.0804041	SPRED1,SPRED2,SPRED3,PLA2R1
1.YC/0.HA	Immature	Up	GO BP	GOBP_PROTEIN_LOCALIZATION_TO_CELL_JUNCTION	GOBP_PROTEIN_LOCALIZATION_TO_CELL_JUNCTION	1.72997	0.00262845	0.0804041	NECTIN3,WNT7A,NECTIN1,GRIP1,HEG1,GPC6,CACNG5,GRIN2C,GRIP2
1.YC/0.HA	Immature	Up	GO BP	GOBP_SIGNAL_TRANSDUCTION_IN_RESPONSE_TO_DNA_DAMAGE	GOBP_SIGNAL_TRANSDUCTION_IN_RESPONSE_TO_DNA_DAMAGE	1.61802	0.00265463	0.0807513	PCBP4,STK33,SOX4,CDC14B,HIPK2,SPRED1,SPRED2,SPRED3,BID,PLA2R1
1.YC/0.HA	Immature	Up	GO BP	GOBP_CELLULAR_COMPONENT_MORPHOGENESIS	GOBP_CELLULAR_COMPONENT_MORPHOGENESIS	0.83937	0.00268959	0.08136	EGFR,WNT7A,FZD4,NECTIN1,ARX,CUX2,NR2E1,NTRK2,SEMA6A,TPBG,NGF,PHLDB1,PHLDB2,EXT1,COBL,PDPN,CSPG5,ARC,GRIP1,CNTN6,EEF2K,OSTN,LAMA2,PRKCQ,RELN,DPYSL5,ZSWIM6,PTPRM,NTN4,LGR6,SGK1,NTN1,GAB2,PID1,LDB3
1.YC/0.HA	Immature	Up	GO BP	GOBP_REGULATION_OF_BLOOD_PRESSURE	GOBP_REGULATION_OF_BLOOD_PRESSURE	1.43872	0.00278713	0.0834	CRH,TAC1,TAC3,ADRA1D,EXT1,LRP5,SGK1,NPR3,NOS1,NMU,SLC2A5,NPY
1.YC/0.HA	Immature	Up	GO BP	GOBP_REGULATION_OF_PHOSPHOLIPASE_ACTIVITY	GOBP_REGULATION_OF_PHOSPHOLIPASE_ACTIVITY	2.01611	0.00278766	0.0834	EGFR,FGF2,NTRK2,P2RY6,PLA2G5,TXK,PLA2R1
1.YC/0.HA	Immature	Up	GO BP	GOBP_LIPID_BIOSYNTHETIC_PROCESS	GOBP_LIPID_BIOSYNTHETIC_PROCESS	0.854652	0.00283219	0.0842691	HPGD,QKI,GAL3ST1,ABCD2,ELOVL2,ELOVL5,ELOVL6,REST,SREBF1,PIK3R6,FGF2,PLCE1,PLA2G5,ST8SIA6,SLC27A1,LTC4S,FADS2,FAXDC2,SERINC5,ABCG1,GBGT1,LCAT,HSD17B7,ACER3,ACSS1,SPTLC2,OSBPL3,LIPC,SCD5,LPGAT1,HSD17B6,MBOAT1,PIK3C2G
1.YC/0.HA	Immature	Up	GO BP	GOBP_REGULATION_OF_NERVOUS_SYSTEM_DEVELOPMENT	GOBP_REGULATION_OF_NERVOUS_SYSTEM_DEVELOPMENT	1.05488	0.00288996	0.0855207	ETV5,SOX8,CHD7,WNT7A,OLIG2,YAP1,DLX1,CUX2,REST,SOX10,NR2E1,DUSP10,NTRK2,SEMA6A,TPBG,NGF,EEF2K,RELN,NTN1,MAN2A1,TNFRSF21,PRTG
1.YC/0.HA	Immature	Up	GO BP	GOBP_RAS_PROTEIN_SIGNAL_TRANSDUCTION	GOBP_RAS_PROTEIN_SIGNAL_TRANSDUCTION	1.15198	0.00294444	0.0862656	IGF1,BCL6,TGFB2,GPSM2,ADRA2A,FGF2,PLCE1,SPRY4,NGF,EPS8,PDPN,HEG1,NTN1,RAPGEF3,CADM4,GPR17,TRIM67,RASGRP2,CYTH4
1.YC/0.HA	Immature	Up	GO BP	GOBP_MESENCHYMAL_CELL_DIFFERENTIATION	GOBP_MESENCHYMAL_CELL_DIFFERENTIATION	1.30304	0.00295153	0.0862656	SOX8,TGFB2,SOX10,TCF7L2,SPRED1,SPRED2,ERBB4,SPRED3,SEMA6A,PHLDB1,PHLDB2,EXT1,PDPN,BAMBI
1.YC/0.HA	Immature	Up	GO BP	GOBP_THIOESTER_BIOSYNTHETIC_PROCESS	GOBP_THIOESTER_BIOSYNTHETIC_PROCESS	2.21435	0.00296266	0.0862656	ELOVL2,ELOVL5,ELOVL6,ACSS1,GCDH,SCD5
1.YC/0.HA	Immature	Up	GO BP	GOBP_ORGANIC_ACID_TRANSMEMBRANE_TRANSPORT	GOBP_ORGANIC_ACID_TRANSMEMBRANE_TRANSPORT	1.50184	0.00299479	0.0867375	ABCD2,PDPN,SLC32A1,SLC27A1,SLC7A8,SLC1A2,SLC38A11,SLC17A8,SLC7A10,SLC5A8,SLC13A5
1.YC/0.HA	Immature	Up	GO BP	GOBP_POSITIVE_REGULATION_OF_EXTRACELLULAR_MATRIX_ORGANIZATION	GOBP_POSITIVE_REGULATION_OF_EXTRACELLULAR_MATRIX_ORGANIZATION	2.93226	0.00310598	0.0894817	PHLDB1,PHLDB2,PDPN,EFEMP2
1.YC/0.HA	Immature	Up	GO BP	GOBP_EMBRYONIC_APPENDAGE_MORPHOGENESIS	GOBP_EMBRYONIC_APPENDAGE_MORPHOGENESIS	1.68663	0.00316406	0.0906752	ROR2,CHD7,TGFB2,WNT7A,PRRX1,LRP5,FBN2,FRAS1,FZD6
1.YC/0.HA	Immature	Up	GO BP	GOBP_REGULATION_OF_PROTEIN_LOCALIZATION	GOBP_REGULATION_OF_PROTEIN_LOCALIZATION	0.794015	0.00319192	0.0909949	UNC13B,CRH,EGFR,IGF1,TGFB2,VIP,WNT7A,SOX4,YAP1,OTUD7B,REST,SREBF1,TCF7L2,GPSM2,ADRA2A,ERBB4,MTCL1,SNX33,LRP5,BID,ARC,TRPM4,SYT9,NMU,PRR5L,ANO1,GPC6,ASTN2,RAPGEF3,SLC12A2,PID1,PPP2R5A,MYO1C,GIPR,KCNS3,CACNA1A,ABCG1,TRIM67
1.YC/0.HA	Immature	Up	GO BP	GOBP_REGULATION_OF_TRANSPORT	GOBP_REGULATION_OF_TRANSPORT	0.605358	0.00322449	0.0914445	MERTK,UNC13B,AZIN2,CRH,EGFR,IGF1,MFGE8,CHD7,TAC1,TGFB2,TRPC3,VIP,WNT7A,SOX4,REST,SREBF1,TCF7L2,ADRA2A,CNKSR3,P2RY6,PLA2G5,MTCL1,SNX33,LRP5,BID,NFE2L2,CSPG5,ARC,EEF2K,OSTN,RELN,SGK1,GAB2,TRPM4,NOS1,SYT9,KMO,NMU,PRR5L,ANO1,PLPP4,CD14,PDE4B,PLA2R1,RAPGEF3,SLC12A2,PID1,MYLK,NETO2,MYO1C,GIPR,KCNS3,CACNA1A,ABCG1,CACNG5,KCNIP1,PRKG2,HIP1,KCNH4,KCNJ16,SHISA8,JPH2,KCNQ4,PXK,ABCG8
1.YC/0.HA	Immature	Up	GO BP	GOBP_CENTRAL_NERVOUS_SYSTEM_NEURON_DIFFERENTIATION	GOBP_CENTRAL_NERVOUS_SYSTEM_NEURON_DIFFERENTIATION	1.40315	0.00335534	0.0946623	WNT7A,SOX4,OLIG2,ARX,DLX1,NR2E1,ERBB4,NTRK2,ZSWIM6,LHX6,NDNF,NPY
1.YC/0.HA	Immature	Up	GO BP	GOBP_ADIPOSE_TISSUE_DEVELOPMENT	GOBP_ADIPOSE_TISSUE_DEVELOPMENT	2.45948	0.00340077	0.0952613	SOX8,LRP5,SH3PXD2B,TRPM4,SPTLC2
1.YC/0.HA	Immature	Up	GO BP	GOBP_POSITIVE_REGULATION_OF_TRANSFERASE_ACTIVITY	GOBP_POSITIVE_REGULATION_OF_TRANSFERASE_ACTIVITY	0.844153	0.0034338	0.0953932	MERTK,ADCY7,EGFR,IGF1,ROR2,STK3,TGFB2,FZD4,CDC14B,NOX4,ADORA2B,PIK3R6,ADRA2A,ERBB4,FGF2,FLT3,GRM4,IRAK1,NTRK2,PLCE1,NGF,AFAP1L2,NEDD9,PRKCQ,RELN,SLC27A1,VAV3,VAV2,DIPK2A,PRR5,SERINC5
1.YC/0.HA	Immature	Up	GO BP	GOBP_POSITIVE_REGULATION_OF_SMALL_MOLECULE_METABOLIC_PROCESS	GOBP_POSITIVE_REGULATION_OF_SMALL_MOLECULE_METABOLIC_PROCESS	1.5582	0.00349592	0.096237	IGF1,ABCD2,ELOVL5,SREBF1,P2RY6,KAT2B,NOS1,PID1,ABCG1,LPGAT1
1.YC/0.HA	Immature	Up	GO BP	GOBP_POSITIVE_REGULATION_OF_ANION_TRANSPORT	GOBP_POSITIVE_REGULATION_OF_ANION_TRANSPORT	0.978984	0.00349953	0.096237	UNC13B,AZIN2,CRH,EGFR,IGF1,TAC1,TGFB2,VIP,SOX4,TCF7L2,MTCL1,BID,NFE2L2,TRPM4,KMO,NMU,PRR5L,ANO1,PLA2R1,RAPGEF3,SLC12A2,MYO1C,GIPR,ABCG1
1.YC/0.HA	Immature	Up	GO BP	GOBP_ANIMAL_ORGAN_MORPHOGENESIS	GOBP_ANIMAL_ORGAN_MORPHOGENESIS	0.726625	0.00354751	0.0970664	NECTIN3,SOX8,ROR2,CHD7,TGFB2,WNT7A,FZD4,NECTIN1,SOX4,YAP1,DLX1,HIPK2,WWOX,PRRX1,FGF2,NPNT,NTRK2,SEMA6A,EXT1,LRP5,LAMA2,HEG1,PTPRM,NTN4,DCHS1,NTN1,COL5A2,FBN2,FMN1,SOX6,FRAS1,PROM1,MAN2A1,GPC6,FZD6,NKD1,FGL1,TSPAN12,EFEMP2,MYLK,VSX1,KCNQ4,COL9A1
1.YC/0.HA	Immature	Up	GO BP	GOBP_TRYPTOPHAN_METABOLIC_PROCESS	GOBP_TRYPTOPHAN_METABOLIC_PROCESS	3.59234	0.00360207	0.0974319	KMO,AFMID,GCDH
1.YC/0.HA	Immature	Up	GO BP	GOBP_GABAERGIC_NEURON_DIFFERENTIATION	GOBP_GABAERGIC_NEURON_DIFFERENTIATION	3.59234	0.00360207	0.0974319	ARX,DLX1,LHX6
1.YC/0.HA	Immature	Up	GO BP	GOBP_STEM_CELL_DIVISION	GOBP_STEM_CELL_DIVISION	2.85771	0.00364862	0.0974319	ETV5,TGFB2,WNT7A,EXT1
1.YC/0.HA	Immature	Up	GO BP	GOBP_REGULATION_OF_OSTEOBLAST_PROLIFERATION	GOBP_REGULATION_OF_OSTEOBLAST_PROLIFERATION	2.85771	0.00364862	0.0974319	SOX8,LRP5,NPR3,MN1
1.YC/0.HA	Immature	Up	GO BP	GOBP_PLATELET_ACTIVATION	GOBP_PLATELET_ACTIVATION	1.46141	0.00365034	0.0974319	MERTK,TRPC3,PIK3R6,ADRA2A,PDPN,PRKCQ,FZD6,VAV3,TEC,TXK,VAV2
1.YC/0.HA	Immature	Up	GO BP	GOBP_REGULATION_OF_NERVOUS_SYSTEM_PROCESS	GOBP_REGULATION_OF_NERVOUS_SYSTEM_PROCESS	1.54652	0.00368712	0.0979335	UNC13B,VIP,WNT7A,CUX2,SOX10,RELN,NMU,TNFRSF21,CACNG5,TAFA4
1.YC/0.HA	Immature	Up	GO BP	GOBP_DEVELOPMENTAL_GROWTH	GOBP_DEVELOPMENTAL_GROWTH	0.902854	0.00375165	0.0991417	IGF1,CHD7,STK3,TGFB2,WNT7A,YAP1,ARX,SOX2,SOX10,DUSP10,ERBB4,FGF2,SEMA6A,NGF,EXT1,COBL,OSTN,HEG1,LGR6,NTN1,EVC,FMN1,NKD1,TEC,TXK,DIPK2A,TLL2,NINJ2
1.YC/0.HA	Immature	Up	GO BP	GOBP_REGULATION_OF_DIGESTIVE_SYSTEM_PROCESS	GOBP_REGULATION_OF_DIGESTIVE_SYSTEM_PROCESS	2.4164	0.00381581	0.0998898	CRH,TAC1,SGK1,NMU,ABCG8
1.YC/0.HA	Immature	Up	GO BP	GOBP_DIGESTION	GOBP_DIGESTION	1.53494	0.00388651	0.101254	CRH,TAC1,ARX,ADRA2A,SGK1,SST,NPR3,NMU,SLC2A5,ABCG8
1.YC/0.HA	Immature	Up	GO BP	GOBP_REGULATION_OF_SYNAPSE_ASSEMBLY	GOBP_REGULATION_OF_SYNAPSE_ASSEMBLY	1.76101	0.00393064	0.101916	WNT7A,NECTIN1,CUX2,NTRK2,TPBG,EEF2K,NTN1,GPC6
1.YC/0.HA	Immature	Up	GO BP	GOBP_RESPONSE_TO_TRANSFORMING_GROWTH_FACTOR_BETA	GOBP_RESPONSE_TO_TRANSFORMING_GROWTH_FACTOR_BETA	1.25891	0.00397412	0.102555	HPGD,TGFB2,WNT7A,NOX4,DLX1,HIPK2,WWOX,SPRED1,SPRED2,SPRED3,BAMBI,FBN2,SOX6,FUT8,LTBP1
1.YC/0.HA	Immature	Up	GO BP	GOBP_NEPHRON_DEVELOPMENT	GOBP_NEPHRON_DEVELOPMENT	1.52344	0.00409435	0.104493	SOX8,YAP1,FGF2,NPNT,PLCE1,EXT1,DCHS1,FMN1,PROM1,MTSS1
1.YC/0.HA	Immature	Up	GO BP	GOBP_CENTRAL_NERVOUS_SYSTEM_DEVELOPMENT	GOBP_CENTRAL_NERVOUS_SYSTEM_DEVELOPMENT	0.720157	0.00416449	0.104493	CRH,EGFR,SOX8,ROR2,CHD7,STK3,WNT7A,CCDC134,FZD4,SOX4,OLIG2,ARX,DLX1,SOX2,SOX10,NR2E1,SOX13,DUSP10,ERBB4,NTRK2,EXT1,CNTN6,RELN,ZSWIM6,HAPLN1,NCAN,HAPLN4,SOX6,SLC32A1,FZD6,LHX6,NDNF,TNFRSF21,NPY,GPR17,SLC17A8,GRIN2C,CTNND1,PCDH18,GRIK1,NOTCH2NLC
1.YC/0.HA	Immature	Up	GO BP	GOBP_REGULATION_OF_LIPASE_ACTIVITY	GOBP_REGULATION_OF_LIPASE_ACTIVITY	1.74424	0.00419339	0.104493	EGFR,FGF2,NTRK2,P2RY6,PLA2G5,TXK,PLA2R1,LIPC
1.YC/0.HA	Immature	Up	GO BP	GOBP_POSITIVE_REGULATION_OF_PEPTIDE_HORMONE_SECRETION	GOBP_POSITIVE_REGULATION_OF_PEPTIDE_HORMONE_SECRETION	1.74424	0.00419339	0.104493	CRH,EGFR,SOX4,TCF7L2,TRPM4,NMU,ANO1,GIPR
1.YC/0.HA	Immature	Up	GO BP	GOBP_IMPORT_ACROSS_PLASMA_MEMBRANE	GOBP_IMPORT_ACROSS_PLASMA_MEMBRANE	1.43173	0.00421358	0.104493	TRPM4,SLC27A1,SLC2A5,SLC12A2,SLC15A2,SLC7A8,SLC1A2,SLC6A1,SLC12A7,KCNJ16,KCNK9
1.YC/0.HA	Immature	Up	GO BP	GOBP_ORGANIC_ACID_BIOSYNTHETIC_PROCESS	GOBP_ORGANIC_ACID_BIOSYNTHETIC_PROCESS	1.13746	0.00421761	0.104493	HPGD,QKI,ABCD2,ELOVL2,ELOVL5,ELOVL6,BHMT2,MTAP,PLA2G5,KMO,LTC4S,FADS2,SERINC5,ACSS1,OSBPL3,LIPC,SCD5,LPGAT1
1.YC/0.HA	Immature	Up	GO BP	GOBP_REGULATION_OF_PROTEIN_MODIFICATION_PROCESS	GOBP_REGULATION_OF_PROTEIN_MODIFICATION_PROCESS	0.598566	0.00423358	0.104493	ADCY7,CRH,EGFR,IGF1,ROR2,BCL6,STK3,TGFB2,FZD4,HDAC4,BLM,USP44,SOX4,CDC14B,NOX4,DNMT3B,HIPK2,SREBF1,TRIB1,DUSP10,ADORA2B,PIK3R6,ADRA2A,CNKSR3,SPRED1,SPRED2,ERBB4,FGF2,FLT3,GRM4,FAS,IRAK1,SPRED3,NTRK2,PLCE1,SPRY4,NGF,SPSB4,KAT2B,LRP5,AFAP1L2,EEF2K,NEDD9,RELN,HEG1,NOS1,SLC27A1,PRR5L,TET1,TEC,TRIB2,RAPGEF3,FAXDC2,CADM4,DIPK2A,PID1,PPP2R5A,PRR5,DEPTOR,RCAN2,ELFN1
1.YC/0.HA	Immature	Up	GO BP	GOBP_INACTIVATION_OF_MAPK_ACTIVITY	GOBP_INACTIVATION_OF_MAPK_ACTIVITY	2.78745	0.00425214	0.104493	DUSP10,SPRED1,SPRED2,SPRED3
1.YC/0.HA	Immature	Up	GO BP	GOBP_RETINA_LAYER_FORMATION	GOBP_RETINA_LAYER_FORMATION	2.78745	0.00425214	0.104493	HIPK2,PTPRM,PROM1,TSPAN12
1.YC/0.HA	Immature	Up	GO BP	GOBP_ANION_TRANSMEMBRANE_TRANSPORT	GOBP_ANION_TRANSMEMBRANE_TRANSPORT	0.903582	0.00427258	0.104493	AZIN2,IGF1,ABCD2,PEX2,NFE2L2,PDPN,OSTN,SLC32A1,SLC27A1,ANO1,SLC2A5,SLC12A2,PID1,SLC15A2,SLC7A8,SLC1A2,SLC6A1,SLC38A11,SLC17A8,SLC7A10,SLC37A4,SLC12A7,SLC5A8,SLC13A5,ANO4,ANO8
1.YC/0.HA	Immature	Up	GO BP	GOBP_MESENCHYME_DEVELOPMENT	GOBP_MESENCHYME_DEVELOPMENT	1.16461	0.0042795	0.104493	SOX8,TGFB2,YAP1,SOX10,TCF7L2,SPRED1,SPRED2,ERBB4,SPRED3,SEMA6A,PHLDB1,PHLDB2,EXT1,PDPN,BAMBI,DCHS1
1.YC/0.HA	Immature	Up	GO BP	GOBP_RESPONSE_TO_DRUG	GOBP_RESPONSE_TO_DRUG	1.05263	0.00449555	0.108651	CRH,EGFR,TGFB2,HDAC4,DNMT3B,NFATC2,REST,SOX10,SREBF1,NFE2L2,PTPRM,SST,NOS1,GAD2,CYP2J2,VAV3,PDE4B,NPC1,ABCG8
1.YC/0.HA	Immature	Up	GO BP	GOBP_VENTRICULAR_TRABECULA_MYOCARDIUM_MORPHOGENESIS	GOBP_VENTRICULAR_TRABECULA_MYOCARDIUM_MORPHOGENESIS	3.44016	0.00458949	0.108651	CHD7,TGFB2,HEG1
1.YC/0.HA	Immature	Up	GO BP	GOBP_NEURON_REMODELING	GOBP_NEURON_REMODELING	3.44016	0.00458949	0.108651	NTN4,ANKS1A,C1QL1
1.YC/0.HA	Immature	Up	GO BP	GOBP_FATTY_ACID_ELONGATION	GOBP_FATTY_ACID_ELONGATION	3.44016	0.00458949	0.108651	ELOVL2,ELOVL5,ELOVL6
1.YC/0.HA	Immature	Up	GO BP	GOBP_ALPHA_LINOLENIC_ACID_METABOLIC_PROCESS	GOBP_ALPHA_LINOLENIC_ACID_METABOLIC_PROCESS	3.44016	0.00458949	0.108651	ELOVL2,ELOVL5,FADS2
1.YC/0.HA	Immature	Up	GO BP	GOBP_NEGATIVE_REGULATION_OF_CELLULAR_RESPONSE_TO_VASCULAR_ENDOTHELIAL_GROWTH_FACTOR_STIMULUS	GOBP_NEGATIVE_REGULATION_OF_CELLULAR_RESPONSE_TO_VASCULAR_ENDOTHELIAL_GROWTH_FACTOR_STIMULUS	3.44016	0.00458949	0.108651	SEMA6A,ADAMTS12,CADM4
1.YC/0.HA	Immature	Up	GO BP	GOBP_CARBOXYLIC_ACID_TRANSPORT	GOBP_CARBOXYLIC_ACID_TRANSPORT	1.14788	0.00465884	0.109342	UNC13B,NTRK2,PLA2G5,SLC32A1,KMO,SLC27A1,PLA2R1,SLC12A2,SLC7A8,SLC1A2,SLC6A1,SLC17A8,SLC7A10,SLC5A8,SLC13A5,SLC16A6
1.YC/0.HA	Immature	Up	GO BP	GOBP_REGULATION_OF_BLOOD_CIRCULATION	GOBP_REGULATION_OF_BLOOD_CIRCULATION	1.14788	0.00465884	0.109342	EGFR,TAC1,TGFB2,HDAC4,SREBF1,ADRA1D,ADRA2A,TRPM4,NOS1,NMU,CYP2J2,PDE4B,CHRM2,TMEM65,CACNG5,KCNIP1
1.YC/0.HA	Immature	Up	GO BP	GOBP_VASCULAR_ENDOTHELIAL_GROWTH_FACTOR_SIGNALING_PATHWAY	GOBP_VASCULAR_ENDOTHELIAL_GROWTH_FACTOR_SIGNALING_PATHWAY	2.3337	0.00475256	0.110797	FLT3,SEMA6A,CADM4,TSPAN12,MYO1C
1.YC/0.HA	Immature	Up	GO BP	GOBP_VASCULOGENESIS	GOBP_VASCULOGENESIS	1.86338	0.00476154	0.110797	WNT7A,FZD4,QKI,YAP1,SPRED1,NTRK2,HEG1
1.YC/0.HA	Immature	Up	GO BP	GOBP_REGULATION_OF_AMPA_RECEPTOR_ACTIVITY	GOBP_REGULATION_OF_AMPA_RECEPTOR_ACTIVITY	2.72027	0.00491954	0.113987	ARC,RELN,CACNG5,SHISA8
1.YC/0.HA	Immature	Up	GO BP	GOBP_REGULATION_OF_PEPTIDE_TRANSPORT	GOBP_REGULATION_OF_PEPTIDE_TRANSPORT	0.893413	0.00497412	0.114763	UNC13B,CRH,EGFR,IGF1,CHD7,TGFB2,SOX4,REST,SREBF1,TCF7L2,ADRA2A,MTCL1,LRP5,BID,ARC,TRPM4,SYT9,NMU,PRR5L,ANO1,RAPGEF3,SLC12A2,MYO1C,GIPR,KCNS3,CACNA1A,ABCG1
1.YC/0.HA	Immature	Up	GO BP	GOBP_DIGESTIVE_SYSTEM_PROCESS	GOBP_DIGESTIVE_SYSTEM_PROCESS	1.69506	0.00506335	0.115695	CRH,TAC1,ADRA2A,SGK1,NPR3,NMU,SLC2A5,ABCG8
1.YC/0.HA	Immature	Up	GO BP	GOBP_REGULATION_OF_POSTSYNAPTIC_MEMBRANE_NEUROTRANSMITTER_RECEPTOR_LEVELS	GOBP_REGULATION_OF_POSTSYNAPTIC_MEMBRANE_NEUROTRANSMITTER_RECEPTOR_LEVELS	2.04068	0.00507824	0.115695	ARC,GRIP1,GPC6,CACNG5,GRIP2,CTNND1
1.YC/0.HA	Immature	Up	GO BP	GOBP_MAPK_CASCADE	GOBP_MAPK_CASCADE	0.750022	0.00510922	0.115915	EGFR,IGF1,ROR2,STK3,TGFB2,WNT7A,FZD4,HIPK2,SOX2,TRIB1,DUSP10,ADORA2B,ADRA1D,PIK3R6,ADRA2A,CNKSR3,SPRED1,SPRED2,ERBB4,FGF2,FLT3,PHLPP1,NPNT,GRM4,IGFBP4,FAS,IRAK1,SPRED3,NTRK2,P2RY6,PLCE1,PLA2G5,MAPK4,SEMA6A,SH3RF1,TPBG,LBH,SPRY4
1.YC/0.HA	Immature	Up	GO BP	GOBP_FATTY_ACYL_COA_METABOLIC_PROCESS	GOBP_FATTY_ACYL_COA_METABOLIC_PROCESS	2.29434	0.0052774	0.118253	ELOVL2,ELOVL5,ELOVL6,GCDH,SCD5
1.YC/0.HA	Immature	Up	GO BP	GOBP_REGULATION_OF_PROTEIN_DEACETYLATION	GOBP_REGULATION_OF_PROTEIN_DEACETYLATION	2.29434	0.0052774	0.118253	BCL6,SREBF1,SPRED1,SPRED2,SPRED3
1.YC/0.HA	Immature	Up	GO BP	GOBP_FATTY_ACID_METABOLIC_PROCESS	GOBP_FATTY_ACID_METABOLIC_PROCESS	1.04078	0.00538326	0.119678	HPGD,QKI,ABCD2,SLC27A6,ELOVL2,PEX2,ELOVL5,ELOVL6,SREBF1,PLA2G5,SLC27A1,CYP2J2,LTC4S,FADS2,ACSS1,GCDH,LIPC,PON3,SCD5,LPGAT1
1.YC/0.HA	Immature	Up	GO BP	GOBP_REGULATION_OF_RAS_PROTEIN_SIGNAL_TRANSDUCTION	GOBP_REGULATION_OF_RAS_PROTEIN_SIGNAL_TRANSDUCTION	1.30962	0.00541277	0.119678	IGF1,BCL6,TGFB2,PLCE1,SPRY4,NGF,EPS8,HEG1,CADM4,GPR17,TRIM67,CYTH4
1.YC/0.HA	Immature	Up	GO BP	GOBP_CELLULAR_RESPONSE_TO_VASCULAR_ENDOTHELIAL_GROWTH_FACTOR_STIMULUS	GOBP_CELLULAR_RESPONSE_TO_VASCULAR_ENDOTHELIAL_GROWTH_FACTOR_STIMULUS	2.01364	0.00551681	0.119678	FLT3,SEMA6A,ADAMTS12,CADM4,TSPAN12,MYO1C
1.YC/0.HA	Immature	Up	GO BP	GOBP_PHOTORECEPTOR_CELL_DIFFERENTIATION	GOBP_PHOTORECEPTOR_CELL_DIFFERENTIATION	2.01364	0.00551681	0.119678	SOX8,DLX1,NTRK2,CDHR1,PROM1,NKD1
1.YC/0.HA	Immature	Up	GO BP	GOBP_POSITIVE_REGULATION_OF_PROTEIN_TYROSINE_KINASE_ACTIVITY	GOBP_POSITIVE_REGULATION_OF_PROTEIN_TYROSINE_KINASE_ACTIVITY	2.01364	0.00551681	0.119678	NOX4,ADRA2A,NTRK2,AFAP1L2,NEDD9,RELN
1.YC/0.HA	Immature	Up	GO BP	GOBP_CELLULAR_RESPONSE_TO_CORTICOSTEROID_STIMULUS	GOBP_CELLULAR_RESPONSE_TO_CORTICOSTEROID_STIMULUS	2.01364	0.00551681	0.119678	CRH,EGFR,DNMT3B,REST,FLT3,SGK1
1.YC/0.HA	Immature	Up	GO BP	GOBP_IMPORT_INTO_CELL	GOBP_IMPORT_INTO_CELL	1.26151	0.00559565	0.120497	ARC,TRPM4,NOS1,SLC27A1,SLC2A5,SLC12A2,SLC15A2,SLC7A8,CACNG5,SLC1A2,SLC6A1,SLC12A7,KCNJ16,KCNK9
1.YC/0.HA	Immature	Up	GO BP	GOBP_CARDIAC_MUSCLE_TISSUE_DEVELOPMENT	GOBP_CARDIAC_MUSCLE_TISSUE_DEVELOPMENT	1.30142	0.00564091	0.120497	IGF1,CHD7,TGFB2,YAP1,ERBB4,FGF2,HEG1,SOX6,DIPK2A,SGCZ,SGCD,JPH2
1.YC/0.HA	Immature	Up	GO BP	GOBP_POSITIVE_REGULATION_OF_PROTEIN_METABOLIC_PROCESS	GOBP_POSITIVE_REGULATION_OF_PROTEIN_METABOLIC_PROCESS	0.599436	0.00564313	0.120497	ADCY7,CRH,EGFR,IGF1,ROR2,BCL6,STK3,TGFB2,VIP,WNT7A,FZD4,HDAC4,SOX4,CDC14B,NOX4,DNMT3B,HIPK2,PAWR,REST,SREBF1,TCF7L2,TRIB1,ADORA2B,PIK3R6,ADRA2A,ERBB4,FGF2,FLT3,GRM4,FAS,IRAK1,NTRK2,PLCE1,NGF,MYLIP,SPSB4,SNX33,BID,AFAP1L2,NFE2L2,NEDD9,RELN,NOS1,SLC27A1,PRR5L,TET1,NKD1,TEC,F3,TRIB2,RAPGEF3,FAXDC2,DIPK2A,PPP2R5A,PRR5,ABCG1,HIP1,TRIM67
1.YC/0.HA	Immature	Up	GO BP	GOBP_CYCLIC_NUCLEOTIDE_CATABOLIC_PROCESS	GOBP_CYCLIC_NUCLEOTIDE_CATABOLIC_PROCESS	3.30276	0.00572507	0.12177	PDE4B,PDE10A,PDE7B
1.YC/0.HA	Immature	Up	GO BP	GOBP_GLYCOSYLATION	GOBP_GLYCOSYLATION	1.16051	0.00581696	0.123243	GAL3ST1,TMEM165,EXT1,ST8SIA6,TET1,FUT8,MAN2A1,MAGT1,GBGT1,GALNT7,NPC1,POGLUT3,TMTC2,GALNT10,GALNT4
1.YC/0.HA	Immature	Up	GO BP	GOBP_PROTEIN_LOCALIZATION_TO_POSTSYNAPSE	GOBP_PROTEIN_LOCALIZATION_TO_POSTSYNAPSE	2.2557	0.00584193	0.123292	GRIP1,GPC6,CACNG5,GRIN2C,GRIP2
1.YC/0.HA	Immature	Up	GO BP	GOBP_FATTY_ACID_DERIVATIVE_METABOLIC_PROCESS	GOBP_FATTY_ACID_DERIVATIVE_METABOLIC_PROCESS	1.80268	0.00587202	0.123443	HPGD,ELOVL2,ELOVL5,ELOVL6,LTC4S,GCDH,SCD5
1.YC/0.HA	Immature	Up	GO BP	GOBP_REGULATION_OF_CELL_MORPHOGENESIS	GOBP_REGULATION_OF_CELL_MORPHOGENESIS	1.13189	0.00589444	0.123443	FZD4,SEPTIN7,CUX2,SPRY4,EPS8,PDPN,CSPG5,FGD5,ARC,GRIP1,BAMBI,EEF2K,OSTN,MYO10,NEDD9,RELN,SHROOM3
1.YC/0.HA	Immature	Up	GO BP	GOBP_NEGATIVE_REGULATION_OF_CELL_DEVELOPMENT	GOBP_NEGATIVE_REGULATION_OF_CELL_DEVELOPMENT	1.35564	0.00605851	0.126393	IGF1,WNT7A,DLX1,REST,SOX10,NR2E1,DUSP10,SEMA6A,SPRY4,NTN1,PRTG
1.YC/0.HA	Immature	Up	GO BP	GOBP_NEURON_MIGRATION	GOBP_NEURON_MIGRATION	1.43454	0.00609074	0.126574	ARX,ERBB4,NTRK2,SEMA6A,SH3RF1,RELN,NTN1,ASTN2,LHX6,NDNF
1.YC/0.HA	Immature	Up	GO BP	GOBP_REGULATION_OF_CELL_JUNCTION_ASSEMBLY	GOBP_REGULATION_OF_CELL_JUNCTION_ASSEMBLY	1.28514	0.00612007	0.126574	COL16A1,WNT7A,NECTIN1,CUX2,NTRK2,TPBG,PHLDB2,EEF2K,NTN1,FMN1,GPC6,MYO1C
1.YC/0.HA	Immature	Up	GO BP	GOBP_POSITIVE_REGULATION_OF_SMOOTH_MUSCLE_CELL_PROLIFERATION	GOBP_POSITIVE_REGULATION_OF_SMOOTH_MUSCLE_CELL_PROLIFERATION	1.78297	0.00628199	0.128565	EGFR,HPGD,IGF1,HDAC4,FGF2,IRAK1,P2RY6
1.YC/0.HA	Immature	Up	GO BP	GOBP_STEROL_HOMEOSTASIS	GOBP_STEROL_HOMEOSTASIS	1.78297	0.00628199	0.128565	MYLIP,LRP5,ABCG1,LCAT,NPC1,LIPC,ABCG8
1.YC/0.HA	Immature	Up	GO BP	GOBP_CELL_PROJECTION_ORGANIZATION	GOBP_CELL_PROJECTION_ORGANIZATION	0.583292	0.00630428	0.128565	EGFR,ROR2,SPATA6,WNT7A,FZD4,HDAC4,SEPTIN7,ABCD2,NECTIN1,CDC14B,YAP1,ARX,CUX2,PRRX1,NR2E1,NTRK2,PLCE1,SEMA6A,TPBG,NGF,MYLIP,POC1B,EXT1,EPS8,NFE2L2,COBL,PDPN,CSPG5,FGD5,ARC,GRIP1,CNTN6,FRYL,EEF2K,OSTN,LAMA2,MYO10,PRKCQ,RELN,DPYSL5,ZSWIM6,PTPRM,NTN4,LGR6,SGK1,NTN1,GAB2,MTSS1,NDNF,VAV3,TNFRSF21,VAV2,MYLK,NPY,TRIM67,MBOAT1,ASAP1,CLMN,DENND5A
1.YC/0.HA	Immature	Up	GO BP	GOBP_POSITIVE_REGULATION_OF_LIPID_METABOLIC_PROCESS	GOBP_POSITIVE_REGULATION_OF_LIPID_METABOLIC_PROCESS	1.42381	0.00638585	0.129742	ABCD2,ELOVL5,SREBF1,FGF2,FLT3,SLC27A1,VAV3,VAV2,ABCG1,LPGAT1
1.YC/0.HA	Immature	Up	GO BP	GOBP_SYNAPTIC_TRANSMISSION_CHOLINERGIC	GOBP_SYNAPTIC_TRANSMISSION_CHOLINERGIC	2.5946	0.00645756	0.13059	TAC1,LAMA2,CHRNA2,CHRNA6
1.YC/0.HA	Immature	Up	GO BP	GOBP_PROTEOGLYCAN_BIOSYNTHETIC_PROCESS	GOBP_PROTEOGLYCAN_BIOSYNTHETIC_PROCESS	1.96103	0.00647609	0.13059	IGF1,TCF7L2,EXT1,CSPG5,NCAN,HS3ST5
1.YC/0.HA	Immature	Up	GO BP	GOBP_CELL_MORPHOGENESIS_INVOLVED_IN_DIFFERENTIATION	GOBP_CELL_MORPHOGENESIS_INVOLVED_IN_DIFFERENTIATION	0.780422	0.00652196	0.13059	MERTK,WNT7A,FZD4,NECTIN1,ARX,CUX2,NR2E1,NTRK2,SEMA6A,TPBG,SPRY4,NGF,EXT1,COBL,PDPN,CSPG5,ARC,CNTN6,EEF2K,LAMA2,NEDD9,PRKCQ,RELN,DPYSL5,HEG1,ZSWIM6,PTPRM,NTN4,LGR6,CDHR1,NTN1,GAB2
1.YC/0.HA	Immature	Up	GO BP	GOBP_NEGATIVE_REGULATION_OF_CELL_POPULATION_PROLIFERATION	GOBP_NEGATIVE_REGULATION_OF_CELL_POPULATION_PROLIFERATION	0.814652	0.00654074	0.13059	ROR2,BCL6,STK3,TGFB2,VIP,HDAC4,PEX2,SOX4,NOX4,PAWR,REST,SOX2,SOX10,NR2E1,TRIB1,DUSP10,ERBB4,TPBG,NGF,KAT2B,PDPN,PTPRM,SST,NPR3,MN1,MTSS1,TMEM131L,TNFRSF21,EFEMP2,CLMN
1.YC/0.HA	Immature	Up	GO BP	GOBP_POSITIVE_REGULATION_OF_HORMONE_SECRETION	GOBP_POSITIVE_REGULATION_OF_HORMONE_SECRETION	1.51242	0.00654749	0.13059	CRH,EGFR,TAC1,SOX4,TCF7L2,TRPM4,NMU,ANO1,GIPR
1.YC/0.HA	Immature	Up	GO BP	GOBP_MUSCLE_ORGAN_DEVELOPMENT	GOBP_MUSCLE_ORGAN_DEVELOPMENT	1.08617	0.00668496	0.132434	SOX8,IGF1,CHD7,TGFB2,HDAC4,LAMA2,HEG1,EVC,SOX6,ITGA11,EFEMP2,MYLK,SGCD,TLL2,JPH2,MKX,FOXN2
1.YC/0.HA	Immature	Up	GO BP	GOBP_REGULATION_OF_HEART_CONTRACTION	GOBP_REGULATION_OF_HEART_CONTRACTION	1.20127	0.00670473	0.132434	TAC1,TGFB2,HDAC4,SREBF1,ADRA1D,TRPM4,NOS1,NMU,CYP2J2,PDE4B,CHRM2,TMEM65,CACNG5,KCNIP1
1.YC/0.HA	Immature	Up	GO BP	GOBP_LONG_TERM_SYNAPTIC_POTENTIATION	GOBP_LONG_TERM_SYNAPTIC_POTENTIATION	1.76351	0.00671292	0.132434	CRH,NR2E1,NTRK2,ARC,RELN,GRIN2C,CALB2
1.YC/0.HA	Immature	Up	GO BP	GOBP_SMALL_GTPASE_MEDIATED_SIGNAL_TRANSDUCTION	GOBP_SMALL_GTPASE_MEDIATED_SIGNAL_TRANSDUCTION	0.908122	0.0067427	0.132542	IGF1,BCL6,TGFB2,GPSM2,ADRA2A,FGF2,PLCE1,SPRY4,NGF,EPS8,PDPN,RELN,HEG1,NTN1,VAV3,VAV2,RAPGEF3,CADM4,GPR17,TRIM67,RASGRP2,CYTH4,ARHGAP31,DOCK6
1.YC/0.HA	Immature	Up	GO BP	GOBP_ENSHEATHMENT_OF_NEURONS	GOBP_ENSHEATHMENT_OF_NEURONS	1.49984	0.00689211	0.134629	QKI,GAL3ST1,ABCD2,OLIG2,SOX10,NTRK2,TNFRSF21,SERINC5,ACER3
1.YC/0.HA	Immature	Up	GO BP	GOBP_LIPOXYGENASE_PATHWAY	GOBP_LIPOXYGENASE_PATHWAY	3.17721	0.0070143	0.134629	HPGD,LTC4S,PON3
1.YC/0.HA	Immature	Up	GO BP	GOBP_ENTERIC_NERVOUS_SYSTEM_DEVELOPMENT	GOBP_ENTERIC_NERVOUS_SYSTEM_DEVELOPMENT	3.17721	0.0070143	0.134629	SOX8,ARX,SOX10
1.YC/0.HA	Immature	Up	GO BP	GOBP_BASEMENT_MEMBRANE_ASSEMBLY	GOBP_BASEMENT_MEMBRANE_ASSEMBLY	3.17721	0.0070143	0.134629	PHLDB1,PHLDB2,NTN4
1.YC/0.HA	Immature	Up	GO BP	GOBP_NEPHRON_TUBULE_EPITHELIAL_CELL_DIFFERENTIATION	GOBP_NEPHRON_TUBULE_EPITHELIAL_CELL_DIFFERENTIATION	3.17721	0.0070143	0.134629	YAP1,PROM1,MTSS1
1.YC/0.HA	Immature	Up	GO BP	GOBP_CONNECTIVE_TISSUE_DEVELOPMENT	GOBP_CONNECTIVE_TISSUE_DEVELOPMENT	1.18815	0.00702371	0.134629	SOX8,ROR2,WNT7A,PRRX1,TRPS1,FGF2,EXT1,LRP5,EVC,SH3PXD2B,SOX6,ADAMTS12,TRPM4,SPTLC2
1.YC/0.HA	Immature	Up	GO BP	GOBP_NEGATIVE_REGULATION_OF_OSTEOBLAST_DIFFERENTIATION	GOBP_NEGATIVE_REGULATION_OF_OSTEOBLAST_DIFFERENTIATION	2.18146	0.00709614	0.134629	HDAC4,LRP5,BAMBI,OSTN,TRPM4
1.YC/0.HA	Immature	Up	GO BP	GOBP_POSITIVE_REGULATION_OF_ORGAN_GROWTH	GOBP_POSITIVE_REGULATION_OF_ORGAN_GROWTH	2.18146	0.00709614	0.134629	IGF1,YAP1,ARX,ERBB4,FGF2
1.YC/0.HA	Immature	Up	GO BP	GOBP_NEUROTRANSMITTER_RECEPTOR_TRANSPORT	GOBP_NEUROTRANSMITTER_RECEPTOR_TRANSPORT	2.18146	0.00709614	0.134629	ARC,GRIP1,CACNG5,HIP1,GRIP2
1.YC/0.HA	Immature	Up	GO BP	GOBP_HEART_GROWTH	GOBP_HEART_GROWTH	1.74431	0.00716543	0.135007	IGF1,TGFB2,YAP1,ERBB4,FGF2,HEG1,DIPK2A
1.YC/0.HA	Immature	Up	GO BP	GOBP_LIPID_METABOLIC_PROCESS	GOBP_LIPID_METABOLIC_PROCESS	0.593976	0.00730944	0.135823	CRH,EGFR,HPGD,QKI,GAL3ST1,ABCD2,SLC27A6,ELOVL2,PEX2,ELOVL5,ELOVL6,REST,SREBF1,PIK3R6,ADRA2A,FGF2,FLT3,PLCE1,PLA2G5,LRP5,ST8SIA6,NAPEPLD,SLC27A1,CYP2J2,LTC4S,FADS2,PLPP4,GPC6,VAV3,TNFRSF21,VAV2,FAXDC2,PPP2R5A,SERINC5,ABCG1,GBGT1,RUBCNL,LCAT,NPC1,HSD17B7,PLCB4,ACER3,ACSS1,SPTLC2,OSBPL3,GCDH,LIPC,PON3,SCD5,LPGAT1,HSD17B6,MBOAT1,GLTP,PIK3C2G
1.YC/0.HA	Immature	Up	GO BP	GOBP_REGULATION_OF_CELL_PROJECTION_ORGANIZATION	GOBP_REGULATION_OF_CELL_PROJECTION_ORGANIZATION	0.816417	0.00732224	0.135823	ROR2,WNT7A,FZD4,HDAC4,SEPTIN7,YAP1,CUX2,PRRX1,NR2E1,NTRK2,PLCE1,SEMA6A,NGF,MYLIP,EPS8,NFE2L2,COBL,PDPN,ARC,GRIP1,EEF2K,MYO10,RELN,NTN1,NDNF,TRIM67,MBOAT1,DENND5A
1.YC/0.HA	Immature	Up	GO BP	GOBP_OSTEOBLAST_PROLIFERATION	GOBP_OSTEOBLAST_PROLIFERATION	2.53564	0.00733367	0.135823	SOX8,LRP5,NPR3,MN1
1.YC/0.HA	Immature	Up	GO BP	GOBP_SUPEROXIDE_METABOLIC_PROCESS	GOBP_SUPEROXIDE_METABOLIC_PROCESS	1.9103	0.00755104	0.137963	EGFR,NOX4,NFE2L2,SH3PXD2B,PON3,TAFA4
1.YC/0.HA	Immature	Up	GO BP	GOBP_POSITIVE_REGULATION_OF_FAT_CELL_DIFFERENTIATION	GOBP_POSITIVE_REGULATION_OF_FAT_CELL_DIFFERENTIATION	1.9103	0.00755104	0.137963	STK3,SOX13,LRP5,TRPM4,NAPEPLD,WIF1
1.YC/0.HA	Immature	Up	GO BP	GOBP_REGULATION_OF_FAT_CELL_DIFFERENTIATION	GOBP_REGULATION_OF_FAT_CELL_DIFFERENTIATION	1.475	0.00762291	0.137963	STK3,YAP1,SOX13,DUSP10,LRP5,TRPM4,NAPEPLD,TRIB2,WIF1
1.YC/0.HA	Immature	Up	GO BP	GOBP_NEGATIVE_REGULATION_OF_TRANSMEMBRANE_RECEPTOR_PROTEIN_SERINE_THREONINE_KINASE_SIGNALING_PATHWAY	GOBP_NEGATIVE_REGULATION_OF_TRANSMEMBRANE_RECEPTOR_PROTEIN_SERINE_THREONINE_KINASE_SIGNALING_PATHWAY	1.475	0.00762291	0.137963	DLX1,HIPK2,SPRED1,SPRED2,SPRED3,BAMBI,FBN2,CHRDL1,LTBP1
1.YC/0.HA	Immature	Up	GO BP	GOBP_REGULATION_OF_NOTCH_SIGNALING_PATHWAY	GOBP_REGULATION_OF_NOTCH_SIGNALING_PATHWAY	1.58639	0.00762662	0.137963	EGFR,BCL6,TGFB2,YAP1,DLX1,KAT2B,CNTN6,NOTCH2NLC
1.YC/0.HA	Immature	Up	GO BP	GOBP_REGULATION_OF_EXTRINSIC_APOPTOTIC_SIGNALING_PATHWAY	GOBP_REGULATION_OF_EXTRINSIC_APOPTOTIC_SIGNALING_PATHWAY	1.3817	0.00767895	0.13845	IGF1,STK3,YAP1,WWOX,TCF7L2,FAS,SH3RF1,RFFL,BID,DEPTOR
1.YC/0.HA	Immature	Up	GO BP	GOBP_REGULATION_OF_PHOSPHOLIPASE_C_ACTIVITY	GOBP_REGULATION_OF_PHOSPHOLIPASE_C_ACTIVITY	2.14561	0.00778877	0.139967	EGFR,FGF2,NTRK2,P2RY6,TXK
1.YC/0.HA	Immature	Up	GO BP	GOBP_BASEMENT_MEMBRANE_ORGANIZATION	GOBP_BASEMENT_MEMBRANE_ORGANIZATION	2.4788	0.00828463	0.147901	PHLDB1,PHLDB2,EXT1,NTN4
1.YC/0.HA	Immature	Up	GO BP	GOBP_NEGATIVE_REGULATION_OF_BEHAVIOR	GOBP_NEGATIVE_REGULATION_OF_BEHAVIOR	3.06175	0.00846188	0.149594	CRH,NMU,NAPEPLD
1.YC/0.HA	Immature	Up	GO BP	GOBP_PODOSOME_ASSEMBLY	GOBP_PODOSOME_ASSEMBLY	3.06175	0.00846188	0.149594	SH3PXD2B,BIN2,ASAP1
1.YC/0.HA	Immature	Up	GO BP	GOBP_CARDIAC_MUSCLE_CELL_PROLIFERATION	GOBP_CARDIAC_MUSCLE_CELL_PROLIFERATION	2.11087	0.00852704	0.150258	TGFB2,YAP1,ERBB4,FGF2,DIPK2A
1.YC/0.HA	Immature	Up	GO BP	GOBP_REGULATION_OF_GLIOGENESIS	GOBP_REGULATION_OF_GLIOGENESIS	1.68819	0.00865874	0.151598	ETV5,SOX8,OLIG2,DLX1,SOX10,NR2E1,DUSP10
1.YC/0.HA	Immature	Up	GO BP	GOBP_ARTERY_DEVELOPMENT	GOBP_ARTERY_DEVELOPMENT	1.68819	0.00865874	0.151598	HPGD,CHD7,TGFB2,SOX4,PRRX1,EFEMP2,MYLK
1.YC/0.HA	Immature	Up	GO BP	GOBP_POSITIVE_REGULATION_OF_ESTABLISHMENT_OF_PROTEIN_LOCALIZATION	GOBP_POSITIVE_REGULATION_OF_ESTABLISHMENT_OF_PROTEIN_LOCALIZATION	1.01781	0.0087563	0.152814	UNC13B,CRH,EGFR,IGF1,TGFB2,SOX4,TCF7L2,MTCL1,BID,TRPM4,NMU,PRR5L,ANO1,RAPGEF3,MYO1C,GIPR,ABCG1
1.YC/0.HA	Immature	Up	GO BP	GOBP_HEART_DEVELOPMENT	GOBP_HEART_DEVELOPMENT	0.86993	0.00882051	0.153227	EGFR,IGF1,CHD7,STK3,TGFB2,SOX4,YAP1,REST,SPRED1,ERBB4,FGF2,PLCE1,KAT2B,EXT1,HEG1,DCHS1,SH3PXD2B,SOX6,DIPK2A,SGCZ,TMEM65,SGCD,JPH2,LDB3,ADAP2
1.YC/0.HA	Immature	Up	GO BP	GOBP_MONOCARBOXYLIC_ACID_TRANSPORT	GOBP_MONOCARBOXYLIC_ACID_TRANSPORT	1.27439	0.00883626	0.153227	UNC13B,NTRK2,PLA2G5,KMO,SLC27A1,PLA2R1,SLC12A2,SLC1A2,SLC17A8,SLC5A8,SLC16A6
1.YC/0.HA	Immature	Up	GO BP	GOBP_UNSATURATED_FATTY_ACID_METABOLIC_PROCESS	GOBP_UNSATURATED_FATTY_ACID_METABOLIC_PROCESS	1.54218	0.00898308	0.154402	HPGD,ABCD2,ELOVL2,ELOVL5,ELOVL6,CYP2J2,FADS2,SCD5
1.YC/0.HA	Immature	Up	GO BP	GOBP_EMBRYO_DEVELOPMENT_ENDING_IN_BIRTH_OR_EGG_HATCHING	GOBP_EMBRYO_DEVELOPMENT_ENDING_IN_BIRTH_OR_EGG_HATCHING	0.822861	0.00898905	0.154402	SOX8,IGF1,ROR2,CHD7,STK3,TGFB2,TFEB,SOX4,YAP1,DLX1,PRRX1,OTUD7B,SOX10,EXT1,COBL,HEG1,SHROOM3,DCHS1,ST8SIA6,TET1,PLPP4,FUT8,MAN2A1,WDR74,FZD6,NKD1,GPR161
1.YC/0.HA	Immature	Up	GO BP	GOBP_NEUROTRANSMITTER_SECRETION	GOBP_NEUROTRANSMITTER_SECRETION	1.34075	0.00916532	0.156935	UNC13B,WNT7A,ADRA2A,GRM4,CSPG5,SLC32A1,SYT9,RPH3A,GAD2,KMO
1.YC/0.HA	Immature	Up	GO BP	GOBP_CELL_CELL_ADHESION	GOBP_CELL_CELL_ADHESION	0.696003	0.00923509	0.157571	EGFR,NECTIN3,IGF1,BCL6,TGFB2,NECTIN1,SOX4,PAWR,SOX2,SOX13,DUSP10,PIK3R6,NPNT,IRAK1,EXT1,PDPN,CNTN6,PRKCQ,PTPRM,DCHS1,CDHR1,NTN1,GPC6,ASTN2,FGL1,TMEM131L,TNFRSF21,PIEZO1,FAT1,CTNND1,PCDH18,NINJ2,CERCAM,FGFRL1,PLEKHA7,LPP
1.YC/0.HA	Immature	Up	GO BP	GOBP_KIDNEY_EPITHELIUM_DEVELOPMENT	GOBP_KIDNEY_EPITHELIUM_DEVELOPMENT	1.42649	0.00926039	0.157571	SOX8,YAP1,FGF2,NPNT,EXT1,DCHS1,FMN1,PROM1,MTSS1
1.YC/0.HA	Immature	Up	GO BP	GOBP_BEHAVIOR	GOBP_BEHAVIOR	0.846393	0.00935272	0.158276	CRH,EGFR,MORC1,CHD7,TAC1,VIP,FZD4,HDAC4,CUX2,HIPK2,NR2E1,NTRK2,TPBG,NGF,EXT1,ARC,RELN,SGK1,NMU,NAPEPLD,NPY,SLC6A1,NPC1,ASIC4,C1QL1
1.YC/0.HA	Immature	Up	GO BP	GOBP_NEGATIVE_REGULATION_OF_TRANSCRIPTION_BY_RNA_POLYMERASE_II	GOBP_NEGATIVE_REGULATION_OF_TRANSCRIPTION_BY_RNA_POLYMERASE_II	0.690482	0.00944814	0.159273	ETV5,ETV6,PATZ1,SOX8,BCL6,HDAC4,PEX2,BACH1,OLIG2,YAP1,GLIS3,ARX,DLX1,DNMT3B,FOXO3,CUX2,HIPK2,HIVEP1,MITF,MXI1,NFATC2,PAWR,WWOX,PRRX1,OTUD7B,REST,RFX5,ZNF487,SOX2,SOX10,SREBF1,TCF7L2,NR2E1,TRPS1,SOX13,ZNF536
1.YC/0.HA	Immature	Up	GO BP	GOBP_POSITIVE_REGULATION_OF_PROTEIN_MODIFICATION_PROCESS	GOBP_POSITIVE_REGULATION_OF_PROTEIN_MODIFICATION_PROCESS	0.659355	0.00954855	0.160469	ADCY7,CRH,EGFR,IGF1,ROR2,BCL6,STK3,TGFB2,FZD4,HDAC4,SOX4,CDC14B,NOX4,DNMT3B,HIPK2,SREBF1,ADORA2B,PIK3R6,ADRA2A,ERBB4,FGF2,FLT3,GRM4,FAS,IRAK1,NTRK2,PLCE1,NGF,SPSB4,AFAP1L2,NEDD9,RELN,NOS1,SLC27A1,PRR5L,TET1,TEC,RAPGEF3,FAXDC2,DIPK2A,PPP2R5A,PRR5
1.YC/0.HA	Immature	Up	GO BP	GOBP_KIDNEY_MORPHOGENESIS	GOBP_KIDNEY_MORPHOGENESIS	1.65195	0.00977369	0.163747	SOX8,SOX4,FGF2,NPNT,DCHS1,FMN1,FRAS1
1.YC/0.HA	Immature	Up	GO BP	GOBP_INDOLALKYLAMINE_METABOLIC_PROCESS	GOBP_INDOLALKYLAMINE_METABOLIC_PROCESS	2.95493	0.0100718	0.166782	KMO,AFMID,GCDH
1.YC/0.HA	Immature	Up	GO BP	GOBP_LOW_DENSITY_LIPOPROTEIN_PARTICLE_REMODELING	GOBP_LOW_DENSITY_LIPOPROTEIN_PARTICLE_REMODELING	2.95493	0.0100718	0.166782	PLA2G5,ABCG1,LIPC
1.YC/0.HA	Immature	Up	GO BP	GOBP_REVERSE_CHOLESTEROL_TRANSPORT	GOBP_REVERSE_CHOLESTEROL_TRANSPORT	2.95493	0.0100718	0.166782	ABCG1,LCAT,LIPC
1.YC/0.HA	Immature	Up	GO BP	GOBP_REGULATION_OF_LIPID_KINASE_ACTIVITY	GOBP_REGULATION_OF_LIPID_KINASE_ACTIVITY	1.81363	0.0100774	0.166782	PIK3R6,FGF2,FLT3,VAV3,VAV2,PPP2R5A
1.YC/0.HA	Immature	Up	GO BP	GOBP_NEURON_APOPTOTIC_PROCESS	GOBP_NEURON_APOPTOTIC_PROCESS	1.17201	0.0101719	0.167341	TGFB2,HDAC4,DLX1,FOXO3,HIPK2,GRM4,FAS,NTRK2,NGF,BID,NDNF,TNFRSF21,NRBP2
1.YC/0.HA	Immature	Up	GO BP	GOBP_NEGATIVE_REGULATION_OF_NERVOUS_SYSTEM_DEVELOPMENT	GOBP_NEGATIVE_REGULATION_OF_NERVOUS_SYSTEM_DEVELOPMENT	1.40284	0.0101726	0.167341	WNT7A,DLX1,REST,SOX10,NR2E1,DUSP10,SEMA6A,NTN1,PRTG
1.YC/0.HA	Immature	Up	GO BP	GOBP_ACTIVATION_OF_PHOSPHOLIPASE_C_ACTIVITY	GOBP_ACTIVATION_OF_PHOSPHOLIPASE_C_ACTIVITY	2.3719	0.0104207	0.169376	EGFR,NTRK2,P2RY6,TXK
1.YC/0.HA	Immature	Up	GO BP	GOBP_LONG_CHAIN_FATTY_ACID_BIOSYNTHETIC_PROCESS	GOBP_LONG_CHAIN_FATTY_ACID_BIOSYNTHETIC_PROCESS	2.3719	0.0104207	0.169376	HPGD,QKI,ELOVL6,LTC4S
1.YC/0.HA	Immature	Up	GO BP	GOBP_POSITIVE_REGULATION_OF_VASCULAR_ASSOCIATED_SMOOTH_MUSCLE_CELL_PROLIFERATION	GOBP_POSITIVE_REGULATION_OF_VASCULAR_ASSOCIATED_SMOOTH_MUSCLE_CELL_PROLIFERATION	2.3719	0.0104207	0.169376	HPGD,IGF1,FGF2,P2RY6
1.YC/0.HA	Immature	Up	GO BP	GOBP_MUSCLE_TISSUE_DEVELOPMENT	GOBP_MUSCLE_TISSUE_DEVELOPMENT	0.993191	0.0108294	0.174456	SOX8,IGF1,CHD7,TGFB2,HDAC4,YAP1,ERBB4,FGF2,HEG1,SOX6,DIPK2A,EFEMP2,MYLK,SGCZ,SGCD,TLL2,JPH2,FOXN2
1.YC/0.HA	Immature	Up	GO BP	GOBP_CELL_SUBSTRATE_ADHESION	GOBP_CELL_SUBSTRATE_ADHESION	0.988761	0.0109507	0.175372	TESK2,MERTK,COL16A1,BCL6,FZD4,NPNT,SPRY4,PHLDB2,PDPN,CSPG5,NEDD9,NTN4,FMN1,ADAMTS12,ITGA11,NDNF,EFEMP2,COL5A3
1.YC/0.HA	Immature	Up	GO BP	GOBP_REGULATION_OF_VASCULAR_ASSOCIATED_SMOOTH_MUSCLE_CELL_PROLIFERATION	GOBP_REGULATION_OF_VASCULAR_ASSOCIATED_SMOOTH_MUSCLE_CELL_PROLIFERATION	2.01117	0.0110295	0.176117	HPGD,IGF1,FGF2,P2RY6,EFEMP2
1.YC/0.HA	Immature	Up	GO BP	GOBP_REGULATION_OF_CELLULAR_COMPONENT_MOVEMENT	GOBP_REGULATION_OF_CELLULAR_COMPONENT_MOVEMENT	0.641886	0.0113102	0.179546	EGFR,PATZ1,IGF1,ROR2,BCL6,TAC1,TGFB2,WNT7A,HDAC4,NOX4,FOXO3,MITF,NR2E1,TRIB1,DUSP10,ADRA2A,SPRED1,ERBB4,FGF2,SEMA6A,RFFL,PHLDB2,NFE2L2,PDPN,LAMA2,NEDD9,ZSWIM6,PTPRM,LGR6,SGK1,NTN1,SST,TRPM4,PRR5L,NKD1,PDE4B,F3,CADM4,MYLK,MYO1C
1.YC/0.HA	Immature	Up	GO BP	GOBP_CELL_JUNCTION_ORGANIZATION	GOBP_CELL_JUNCTION_ORGANIZATION	0.742666	0.0113534	0.179708	TESK2,UNC13B,COL16A1,NECTIN3,TGFB2,WNT7A,NECTIN1,CUX2,REST,ERBB4,NTRK2,TPBG,PHLDB2,EXT1,ARC,EEF2K,RELN,HEG1,DCHS1,NTN1,FMN1,GPC6,MYO1C,SLC6A1,ELFN1,FRMPD2,CTNND1,LGI2,C1QL1,PLEKHA7
1.YC/0.HA	Immature	Up	GO BP	GOBP_NEGATIVE_REGULATION_OF_GLIOGENESIS	GOBP_NEGATIVE_REGULATION_OF_GLIOGENESIS	2.32101	0.0116104	0.181598	DLX1,SOX10,NR2E1,DUSP10
1.YC/0.HA	Immature	Up	GO BP	GOBP_REGULATION_OF_DNA_DAMAGE_RESPONSE_SIGNAL_TRANSDUCTION_BY_P53_CLASS_MEDIATOR	GOBP_REGULATION_OF_DNA_DAMAGE_RESPONSE_SIGNAL_TRANSDUCTION_BY_P53_CLASS_MEDIATOR	2.32101	0.0116104	0.181598	SPRED1,SPRED2,SPRED3,PLA2R1
1.YC/0.HA	Immature	Up	GO BP	GOBP_FOREBRAIN_DEVELOPMENT	GOBP_FOREBRAIN_DEVELOPMENT	0.966806	0.0116558	0.181598	CRH,CHD7,WNT7A,OLIG2,ARX,DLX1,SOX2,NR2E1,ERBB4,NTRK2,EXT1,RELN,ZSWIM6,SLC32A1,LHX6,NDNF,NPY,NOTCH2NLC
1.YC/0.HA	Immature	Up	GO BP	GOBP_MUSCLE_STRUCTURE_DEVELOPMENT	GOBP_MUSCLE_STRUCTURE_DEVELOPMENT	0.813445	0.0117052	0.181598	SOX8,IGF1,CHD7,TGFB2,QKI,HDAC4,NFATC2,REST,TCF7L2,LAMA2,HEG1,EVC,SOX6,ITGA11,NOS1,NKD1,EFEMP2,MYLK,OLFM2,SGCZ,SGCD,TLL2,JPH2,LDB3,MKX,FOXN2
1.YC/0.HA	Immature	Up	GO BP	GOBP_TELENCEPHALON_DEVELOPMENT	GOBP_TELENCEPHALON_DEVELOPMENT	1.13095	0.0117397	0.181598	CHD7,ARX,DLX1,NR2E1,ERBB4,NTRK2,EXT1,RELN,ZSWIM6,SLC32A1,LHX6,NPY,NOTCH2NLC
1.YC/0.HA	Immature	Up	GO BP	GOBP_HIGH_DENSITY_LIPOPROTEIN_PARTICLE_REMODELING	GOBP_HIGH_DENSITY_LIPOPROTEIN_PARTICLE_REMODELING	2.85491	0.0118473	0.182743	ABCG1,LCAT,LIPC
1.YC/0.HA	Immature	Up	GO BP	GOBP_AORTA_DEVELOPMENT	GOBP_AORTA_DEVELOPMENT	1.9794	0.0119641	0.184024	CHD7,TGFB2,SOX4,EFEMP2,MYLK
1.YC/0.HA	Immature	Up	GO BP	GOBP_POSITIVE_REGULATION_OF_CELLULAR_COMPONENT_BIOGENESIS	GOBP_POSITIVE_REGULATION_OF_CELLULAR_COMPONENT_BIOGENESIS	0.834298	0.0123004	0.188581	UNC13B,COL16A1,TAC1,WNT7A,HDAC4,SEPTIN7,NOX4,CUX2,GPSM2,NTRK2,PLCE1,TPBG,PHLDB1,PHLDB2,EPS8,BID,COBL,EEF2K,FMN1,RAPGEF3,MYO1C,PIEZO1,FCHSD2,ASAP1
1.YC/0.HA	Immature	Up	GO BP	GOBP_POSITIVE_REGULATION_OF_INSULIN_SECRETION	GOBP_POSITIVE_REGULATION_OF_INSULIN_SECRETION	1.74519	0.0123296	0.188581	CRH,SOX4,TCF7L2,TRPM4,ANO1,GIPR
1.YC/0.HA	Immature	Up	GO BP	GOBP_POSITIVE_REGULATION_OF_PROTEIN_KINASE_ACTIVITY	GOBP_POSITIVE_REGULATION_OF_PROTEIN_KINASE_ACTIVITY	0.831306	0.012396	0.189065	ADCY7,EGFR,IGF1,ROR2,STK3,TGFB2,FZD4,NOX4,ADORA2B,PIK3R6,ADRA2A,FGF2,FLT3,GRM4,IRAK1,NTRK2,PLCE1,NGF,AFAP1L2,NEDD9,RELN,SLC27A1,DIPK2A,PRR5
1.YC/0.HA	Immature	Up	GO BP	GOBP_RESPONSE_TO_BMP	GOBP_RESPONSE_TO_BMP	1.26197	0.0127883	0.193962	ROR2,TGFB2,DLX1,HIPK2,HIVEP1,EXT1,BAMBI,ADAMTS12,CHRDL1,FSTL1
1.YC/0.HA	Immature	Up	GO BP	GOBP_CATION_TRANSMEMBRANE_TRANSPORT	GOBP_CATION_TRANSMEMBRANE_TRANSPORT	0.679497	0.0128679	0.194328	CRH,CHD7,TRPC3,SLC39A11,TMEM165,TCN2,ADRA2A,FGF2,P2RY6,ARC,RELN,TRPM4,NOS1,ANO1,MAGT1,PDE4B,SLC12A2,NETO2,SLC15A2,KCNS3,CACNA1A,SLC7A8,CACNG5,KCNIP1,SLC6A1,TRPM6,SLC12A7,KCNH4,GRIN2C,KCNJ16,SHISA8,KCNK9,ASIC4,JPH2,KCNQ4,PIEZO1
1.YC/0.HA	Immature	Up	GO BP	GOBP_REGULATION_OF_PLATELET_ACTIVATION	GOBP_REGULATION_OF_PLATELET_ACTIVATION	2.27229	0.0128838	0.194328	PDPN,PRKCQ,TEC,TXK
1.YC/0.HA	Immature	Up	GO BP	GOBP_COLLAGEN_FIBRIL_ORGANIZATION	GOBP_COLLAGEN_FIBRIL_ORGANIZATION	1.94832	0.012951	0.194388	TGFB2,EXT1,COL5A2,EFEMP2,COL5A3
1.YC/0.HA	Immature	Up	GO BP	GOBP_NEURON_PROJECTION_GUIDANCE	GOBP_NEURON_PROJECTION_GUIDANCE	1.06251	0.0129592	0.194388	NECTIN1,ARX,SEMA6A,EXT1,CNTN6,LAMA2,PRKCQ,RELN,DPYSL5,ZSWIM6,PTPRM,NTN4,LGR6,NTN1,GAB2
1.YC/0.HA	Immature	Up	GO BP	GOBP_DICARBOXYLIC_ACID_TRANSPORT	GOBP_DICARBOXYLIC_ACID_TRANSPORT	1.5651	0.013015	0.194689	UNC13B,NTRK2,KMO,SLC12A2,SLC1A2,SLC17A8,SLC13A5
1.YC/0.HA	Immature	Up	GO BP	GOBP_CELL_ADHESION_MEDIATED_BY_INTEGRIN	GOBP_CELL_ADHESION_MEDIATED_BY_INTEGRIN	1.72308	0.0131531	0.195679	COL16A1,TGFB2,NPNT,EXT1,ITGA11,PIEZO1
1.YC/0.HA	Immature	Up	GO BP	GOBP_POSITIVE_REGULATION_OF_LIPASE_ACTIVITY	GOBP_POSITIVE_REGULATION_OF_LIPASE_ACTIVITY	1.72308	0.0131531	0.195679	EGFR,FGF2,NTRK2,P2RY6,PLA2G5,TXK
1.YC/0.HA	Immature	Up	GO BP	GOBP_POSITIVE_REGULATION_OF_CELL_ADHESION	GOBP_POSITIVE_REGULATION_OF_CELL_ADHESION	0.888075	0.0132503	0.196588	COL16A1,IGF1,BCL6,TGFB2,SOX4,SOX2,SOX13,DUSP10,PIK3R6,NPNT,IRAK1,PDPN,CSPG5,NEDD9,PRKCQ,FMN1,NDNF,VAV3,EFEMP2,PIEZO1
1.YC/0.HA	Immature	Up	GO BP	GOBP_POSITIVE_REGULATION_OF_PHOSPHORUS_METABOLIC_PROCESS	GOBP_POSITIVE_REGULATION_OF_PHOSPHORUS_METABOLIC_PROCESS	0.64255	0.0136156	0.198132	MERTK,ADCY7,CRH,EGFR,IGF1,ROR2,STK3,TGFB2,FZD4,NOX4,HIPK2,ADORA2B,PIK3R6,ADRA2A,ERBB4,FGF2,FLT3,GRM4,FAS,IRAK1,NTRK2,P2RY6,PLCE1,NGF,AFAP1L2,NEDD9,RELN,NOS1,SLC27A1,PRR5L,VAV3,TEC,VAV2,RAPGEF3,FAXDC2,DIPK2A,PID1,PPP2R5A,PRR5
1.YC/0.HA	Immature	Up	GO BP	GOBP_AMINO_ACID_TRANSMEMBRANE_TRANSPORT	GOBP_AMINO_ACID_TRANSMEMBRANE_TRANSPORT	1.54833	0.0137459	0.198132	PDPN,SLC32A1,SLC7A8,SLC1A2,SLC38A11,SLC17A8,SLC7A10
1.YC/0.HA	Immature	Up	GO BP	GOBP_REGULATION_OF_CELL_MORPHOGENESIS_INVOLVED_IN_DIFFERENTIATION	GOBP_REGULATION_OF_CELL_MORPHOGENESIS_INVOLVED_IN_DIFFERENTIATION	1.54833	0.0137459	0.198132	CUX2,SPRY4,PDPN,CSPG5,EEF2K,NEDD9,RELN
1.YC/0.HA	Immature	Up	GO BP	GOBP_LENS_MORPHOGENESIS_IN_CAMERA_TYPE_EYE	GOBP_LENS_MORPHOGENESIS_IN_CAMERA_TYPE_EYE	2.76193	0.013791	0.198132	NECTIN3,NECTIN1,HIPK2
1.YC/0.HA	Immature	Up	GO BP	GOBP_N_GLYCAN_PROCESSING	GOBP_N_GLYCAN_PROCESSING	2.76193	0.013791	0.198132	ST8SIA6,FUT8,MAN2A1
1.YC/0.HA	Immature	Up	GO BP	GOBP_LONG_CHAIN_FATTY_ACYL_COA_BIOSYNTHETIC_PROCESS	GOBP_LONG_CHAIN_FATTY_ACYL_COA_BIOSYNTHETIC_PROCESS	2.76193	0.013791	0.198132	ELOVL2,ELOVL5,ELOVL6
1.YC/0.HA	Immature	Up	GO BP	GOBP_POSITIVE_REGULATION_OF_DENDRITIC_SPINE_MORPHOGENESIS	GOBP_POSITIVE_REGULATION_OF_DENDRITIC_SPINE_MORPHOGENESIS	2.76193	0.013791	0.198132	CUX2,EEF2K,RELN
1.YC/0.HA	Immature	Up	GO BP	GOBP_NEURONAL_STEM_CELL_POPULATION_MAINTENANCE	GOBP_NEURONAL_STEM_CELL_POPULATION_MAINTENANCE	2.76193	0.013791	0.198132	PRRX1,REST,SOX2
1.YC/0.HA	Immature	Up	GO BP	GOBP_SODIUM_ION_IMPORT_ACROSS_PLASMA_MEMBRANE	GOBP_SODIUM_ION_IMPORT_ACROSS_PLASMA_MEMBRANE	2.76193	0.013791	0.198132	TRPM4,SLC12A2,SLC6A1
1.YC/0.HA	Immature	Up	GO BP	GOBP_POSITIVE_REGULATION_OF_MUSCLE_ADAPTATION	GOBP_POSITIVE_REGULATION_OF_MUSCLE_ADAPTATION	3.85217	0.014002	0.200107	TRPC3,FOXO3
1.YC/0.HA	Immature	Up	GO BP	GOBP_NEGATIVE_REGULATION_OF_SMOOTH_MUSCLE_CELL_APOPTOTIC_PROCESS	GOBP_NEGATIVE_REGULATION_OF_SMOOTH_MUSCLE_CELL_APOPTOTIC_PROCESS	3.85217	0.014002	0.200107	IGF1,DIPK2A
1.YC/0.HA	Immature	Up	GO BP	GOBP_NEGATIVE_REGULATION_OF_EPITHELIAL_TO_MESENCHYMAL_TRANSITION	GOBP_NEGATIVE_REGULATION_OF_EPITHELIAL_TO_MESENCHYMAL_TRANSITION	2.22502	0.014243	0.201437	TGFB2,SPRED1,SPRED2,SPRED3
1.YC/0.HA	Immature	Up	GO BP	GOBP_PROTEIN_CONTAINING_COMPLEX_REMODELING	GOBP_PROTEIN_CONTAINING_COMPLEX_REMODELING	2.22502	0.014243	0.201437	PLA2G5,ABCG1,LCAT,LIPC
1.YC/0.HA	Immature	Up	GO BP	GOBP_SUPEROXIDE_ANION_GENERATION	GOBP_SUPEROXIDE_ANION_GENERATION	2.22502	0.014243	0.201437	EGFR,NOX4,PON3,TAFA4
1.YC/0.HA	Immature	Up	GO BP	GOBP_POSITIVE_REGULATION_OF_HEART_GROWTH	GOBP_POSITIVE_REGULATION_OF_HEART_GROWTH	2.22502	0.014243	0.201437	IGF1,YAP1,ERBB4,FGF2
1.YC/0.HA	Immature	Up	GO BP	GOBP_POSITIVE_REGULATION_OF_CELL_JUNCTION_ASSEMBLY	GOBP_POSITIVE_REGULATION_OF_CELL_JUNCTION_ASSEMBLY	1.51537	0.0152952	0.2152	COL16A1,WNT7A,CUX2,NTRK2,TPBG,EEF2K,FMN1
1.YC/0.HA	Immature	Up	GO BP	GOBP_REGULATION_OF_CELL_SUBSTRATE_ADHESION	GOBP_REGULATION_OF_CELL_SUBSTRATE_ADHESION	1.13872	0.0154176	0.215807	COL16A1,BCL6,FZD4,NPNT,SPRY4,PHLDB2,PDPN,CSPG5,NEDD9,FMN1,NDNF,EFEMP2
1.YC/0.HA	Immature	Up	GO BP	GOBP_FAT_CELL_DIFFERENTIATION	GOBP_FAT_CELL_DIFFERENTIATION	1.13872	0.0154176	0.215807	SOX8,STK3,YAP1,SREBF1,TCF7L2,SOX13,DUSP10,LRP5,TRPM4,NAPEPLD,TRIB2,WIF1
1.YC/0.HA	Immature	Up	GO BP	GOBP_POSITIVE_REGULATION_OF_CELL_PROJECTION_ORGANIZATION	GOBP_POSITIVE_REGULATION_OF_CELL_PROJECTION_ORGANIZATION	0.95699	0.0156545	0.217594	ROR2,FZD4,HDAC4,SEPTIN7,CUX2,NTRK2,PLCE1,NGF,EPS8,NFE2L2,COBL,GRIP1,EEF2K,RELN,NTN1,NDNF,TRIM67
1.YC/0.HA	Immature	Up	GO BP	GOBP_REGULATION_OF_GROWTH	GOBP_REGULATION_OF_GROWTH	0.745299	0.0156926	0.217594	EGFR,IGF1,CHD7,BCL6,STK3,TGFB2,YAP1,ARX,DUSP10,ERBB4,FGF2,IGFBP4,PLCE1,SEMA6A,NGF,CSPG5,OSTN,NEDD9,PRKCQ,SGK1,NTN1,NKD1,TLL2,IL17RB,GNG4,RASGRP2,DCBLD2
1.YC/0.HA	Immature	Up	GO BP	GOBP_CARBOHYDRATE_DERIVATIVE_METABOLIC_PROCESS	GOBP_CARBOHYDRATE_DERIVATIVE_METABOLIC_PROCESS	0.593149	0.0158281	0.217594	ADCY7,IGF1,GAL3ST1,HDAC4,ELOVL2,ELOVL5,ELOVL6,TMEM165,MTAP,PAWR,TCF7L2,FGF2,EXT1,CSPG5,NCAN,ADAMTS12,PAPSS2,ST8SIA6,TET1,FUT8,MAN2A1,GPC6,NDNF,MAGT1,PDE4B,PID1,DHTKD1,GBGT1,GALNT7,HS3ST5,ITIH5,NPC1,ACSS1,GCDH,CTPS2,SCD5,PDE10A,PDE7B,POGLUT3,TMTC2,GALNT10,GALNT4,GLTP
1.YC/0.HA	Immature	Up	GO BP	GOBP_EMBRYONIC_MORPHOGENESIS	GOBP_EMBRYONIC_MORPHOGENESIS	0.783818	0.0158815	0.217594	SOX8,ROR2,CHD7,STK3,TGFB2,WNT7A,SOX4,YAP1,HIPK2,PRRX1,SOX2,FGF2,PHLDB1,PHLDB2,EXT1,LRP5,COBL,SHROOM3,NTN1,COL5A2,COL6A1,FBN2,FRAS1,FZD6,KCNQ4
1.YC/0.HA	Immature	Up	GO BP	GOBP_CARDIAC_RIGHT_VENTRICLE_MORPHOGENESIS	GOBP_CARDIAC_RIGHT_VENTRICLE_MORPHOGENESIS	2.67441	0.015905	0.217594	CHD7,TGFB2,SOX4
1.YC/0.HA	Immature	Up	GO BP	GOBP_NEGATIVE_REGULATION_OF_GLIAL_CELL_DIFFERENTIATION	GOBP_NEGATIVE_REGULATION_OF_GLIAL_CELL_DIFFERENTIATION	2.67441	0.015905	0.217594	DLX1,NR2E1,DUSP10
1.YC/0.HA	Immature	Up	GO BP	GOBP_PLASMA_MEMBRANE_TUBULATION	GOBP_PLASMA_MEMBRANE_TUBULATION	2.67441	0.015905	0.217594	SNX33,BIN2,ASAP1
1.YC/0.HA	Immature	Up	GO BP	GOBP_NEGATIVE_REGULATION_OF_STEM_CELL_DIFFERENTIATION	GOBP_NEGATIVE_REGULATION_OF_STEM_CELL_DIFFERENTIATION	2.67441	0.015905	0.217594	YAP1,REST,NFE2L2
1.YC/0.HA	Immature	Up	GO BP	GOBP_EXTRINSIC_APOPTOTIC_SIGNALING_PATHWAY	GOBP_EXTRINSIC_APOPTOTIC_SIGNALING_PATHWAY	1.1241	0.0161421	0.219734	IGF1,STK3,TGFB2,YAP1,WWOX,TCF7L2,FAS,SH3RF1,NGF,RFFL,BID,DEPTOR
1.YC/0.HA	Immature	Up	GO BP	GOBP_POSITIVE_REGULATION_OF_NOTCH_SIGNALING_PATHWAY	GOBP_POSITIVE_REGULATION_OF_NOTCH_SIGNALING_PATHWAY	1.85864	0.0162377	0.219936	TGFB2,YAP1,KAT2B,CNTN6,NOTCH2NLC
1.YC/0.HA	Immature	Up	GO BP	GOBP_NEGATIVE_REGULATION_OF_SMALL_GTPASE_MEDIATED_SIGNAL_TRANSDUCTION	GOBP_NEGATIVE_REGULATION_OF_SMALL_GTPASE_MEDIATED_SIGNAL_TRANSDUCTION	1.85864	0.0162377	0.219936	BCL6,TGFB2,SPRY4,HEG1,TRIM67
1.YC/0.HA	Immature	Up	GO BP	GOBP_EPITHELIAL_TO_MESENCHYMAL_TRANSITION	GOBP_EPITHELIAL_TO_MESENCHYMAL_TRANSITION	1.26857	0.0171306	0.23045	TGFB2,TCF7L2,SPRED1,SPRED2,SPRED3,PHLDB1,PHLDB2,PDPN,BAMBI
1.YC/0.HA	Immature	Up	GO BP	GOBP_PHOSPHATIDYLSERINE_METABOLIC_PROCESS	GOBP_PHOSPHATIDYLSERINE_METABOLIC_PROCESS	2.13444	0.0172255	0.23045	PLA2G5,SLC27A1,SERINC5,MBOAT1
1.YC/0.HA	Immature	Up	GO BP	GOBP_REGULATION_OF_OLIGODENDROCYTE_DIFFERENTIATION	GOBP_REGULATION_OF_OLIGODENDROCYTE_DIFFERENTIATION	2.13444	0.0172255	0.23045	OLIG2,DLX1,DUSP10,TNFRSF21
1.YC/0.HA	Immature	Up	GO BP	GOBP_POSITIVE_REGULATION_OF_LIPID_KINASE_ACTIVITY	GOBP_POSITIVE_REGULATION_OF_LIPID_KINASE_ACTIVITY	2.13444	0.0172255	0.23045	FGF2,FLT3,VAV3,VAV2
1.YC/0.HA	Immature	Up	GO BP	GOBP_NUCLEOSIDE_PHOSPHATE_BIOSYNTHETIC_PROCESS	GOBP_NUCLEOSIDE_PHOSPHATE_BIOSYNTHETIC_PROCESS	1.06954	0.0173985	0.231625	ADCY7,ELOVL2,ELOVL5,ELOVL6,PAPSS2,NOS1,KMO,PID1,ACSS1,AFMID,GCDH,CTPS2,SCD5,SLC5A8
1.YC/0.HA	Immature	Up	GO BP	GOBP_REGULATION_OF_PHOSPHATIDYLINOSITOL_3_KINASE_ACTIVITY	GOBP_REGULATION_OF_PHOSPHATIDYLINOSITOL_3_KINASE_ACTIVITY	1.83007	0.0174458	0.231688	PIK3R6,FGF2,FLT3,VAV3,VAV2
1.YC/0.HA	Immature	Up	GO BP	GOBP_REGULATION_OF_CELL_DEATH	GOBP_REGULATION_OF_CELL_DEATH	0.512524	0.0176259	0.233511	MERTK,UNC13B,CRH,EGFR,SOX8,HPGD,IGF1,BCL6,STK3,TGFB2,VIP,WNT7A,HDAC4,SOX4,NOX4,YAP1,DLX1,FOXO3,HIPK2,MITF,PAWR,WWOX,REST,SOX10,TCF7L2,NR2E1,FGF2,FLT3,PHLPP1,GRM4,FAS,IRAK1,NTRK2,SH3RF1,NGF,RFFL,LRP5,BID,NFE2L2,PDPN,EEF2K,PRKCQ,SGK1,KMO,FSTL1,NDNF,VAV3,VAV2,PLA2R1,CARD18,DIPK2A,DEPTOR,NPC1,ACER3,NRBP2,HIP1,ADAMTS20,TNFRSF10D
1.YC/0.HA	Immature	Up	GO BP	GOBP_ALPHA_AMINO_ACID_METABOLIC_PROCESS	GOBP_ALPHA_AMINO_ACID_METABOLIC_PROCESS	1.2142	0.0178733	0.236214	AZIN2,BHMT2,MTAP,NOX4,NOS1,GAD2,KMO,SERINC5,AFMID,GCDH,CTPS2
1.YC/0.HA	Immature	Up	GO BP	GOBP_AMEBOIDAL_TYPE_CELL_MIGRATION	GOBP_AMEBOIDAL_TYPE_CELL_MIGRATION	0.863811	0.0181616	0.237525	PATZ1,SOX8,TAC1,TGFB2,WNT7A,SOX10,NR2E1,DUSP10,SPRED1,ERBB4,FGF2,SEMA6A,TPBG,RFFL,LRP5,NFE2L2,PTPRM,FSTL1,PRR5L
1.YC/0.HA	Immature	Up	GO BP	GOBP_STEROID_HORMONE_SECRETION	GOBP_STEROID_HORMONE_SECRETION	2.59188	0.0181906	0.237525	CRH,TAC1,FZD4
1.YC/0.HA	Immature	Up	GO BP	GOBP_PEPTIDYL_TYROSINE_AUTOPHOSPHORYLATION	GOBP_PEPTIDYL_TYROSINE_AUTOPHOSPHORYLATION	2.59188	0.0181906	0.237525	EGFR,TEC,TXK
1.YC/0.HA	Immature	Up	GO BP	GOBP_POSITIVE_REGULATION_OF_FATTY_ACID_BIOSYNTHETIC_PROCESS	GOBP_POSITIVE_REGULATION_OF_FATTY_ACID_BIOSYNTHETIC_PROCESS	2.59188	0.0181906	0.237525	ABCD2,ELOVL5,LPGAT1
1.YC/0.HA	Immature	Up	GO BP	GOBP_POSITIVE_REGULATION_OF_ALCOHOL_BIOSYNTHETIC_PROCESS	GOBP_POSITIVE_REGULATION_OF_ALCOHOL_BIOSYNTHETIC_PROCESS	2.59188	0.0181906	0.237525	SREBF1,P2RY6,ABCG1
1.YC/0.HA	Immature	Up	GO BP	GOBP_ORGANOPHOSPHATE_BIOSYNTHETIC_PROCESS	GOBP_ORGANOPHOSPHATE_BIOSYNTHETIC_PROCESS	0.739817	0.0182796	0.238116	ADCY7,ELOVL2,ELOVL5,ELOVL6,PIK3R6,FGF2,P2RY6,PLA2G5,PAPSS2,NOS1,KMO,SLC27A1,PID1,SERINC5,LCAT,ACSS1,SPTLC2,AFMID,GCDH,CTPS2,SCD5,LPGAT1,MBOAT1,PIK3C2G,SLC5A8
1.YC/0.HA	Immature	Up	GO BP	GOBP_POSITIVE_REGULATION_OF_CHOLESTEROL_METABOLIC_PROCESS	GOBP_POSITIVE_REGULATION_OF_CHOLESTEROL_METABOLIC_PROCESS	3.58936	0.018338	0.238306	SREBF1,ABCG1
1.YC/0.HA	Immature	Up	GO BP	GOBP_ERK1_AND_ERK2_CASCADE	GOBP_ERK1_AND_ERK2_CASCADE	0.954962	0.0184415	0.239081	EGFR,IGF1,DUSP10,CNKSR3,SPRED1,SPRED2,ERBB4,FGF2,NPNT,SPRED3,P2RY6,PLA2G5,SEMA6A,TPBG,SPRY4
1.YC/0.HA	Immature	Up	GO BP	GOBP_REGULATION_OF_WOUND_HEALING	GOBP_REGULATION_OF_WOUND_HEALING	1.33928	0.018596	0.239941	ADRA2A,FGF2,PHLDB2,NFE2L2,F3,SLC12A2,CADM4,MYLK
1.YC/0.HA	Immature	Up	GO BP	GOBP_REGULATION_OF_CELLULAR_RESPONSE_TO_TRANSFORMING_GROWTH_FACTOR_BETA_STIMULUS	GOBP_REGULATION_OF_CELLULAR_RESPONSE_TO_TRANSFORMING_GROWTH_FACTOR_BETA_STIMULUS	1.33928	0.018596	0.239941	DLX1,HIPK2,SPRED1,SPRED2,SPRED3,BAMBI,FBN2,LTBP1
1.YC/0.HA	Immature	Up	GO BP	GOBP_REGULATION_OF_NEURON_DIFFERENTIATION	GOBP_REGULATION_OF_NEURON_DIFFERENTIATION	1.18906	0.0187465	0.241311	ETV5,SOX8,BCL6,OLIG2,DLX1,DNMT3B,REST,SOX2,NR2E1,ZNF536,NGF
1.YC/0.HA	Immature	Up	GO BP	GOBP_WNT_SIGNALING_PATHWAY_CALCIUM_MODULATING_PATHWAY	GOBP_WNT_SIGNALING_PATHWAY_CALCIUM_MODULATING_PATHWAY	2.09133	0.018852	0.242097	ROR2,FZD4,TCF7L2,FZD6
1.YC/0.HA	Immature	Up	GO BP	GOBP_JNK_CASCADE	GOBP_JNK_CASCADE	1.18077	0.0190729	0.244357	EGFR,ROR2,STK3,WNT7A,HIPK2,TRIB1,DUSP10,ADORA2B,PHLPP1,IRAK1,SH3RF1
1.YC/0.HA	Immature	Up	GO BP	GOBP_POSITIVE_REGULATION_OF_PROTEIN_PHOSPHORYLATION	GOBP_POSITIVE_REGULATION_OF_PROTEIN_PHOSPHORYLATION	0.649025	0.0191363	0.244594	ADCY7,CRH,EGFR,IGF1,ROR2,STK3,TGFB2,FZD4,NOX4,HIPK2,ADORA2B,PIK3R6,ADRA2A,ERBB4,FGF2,FLT3,GRM4,FAS,IRAK1,NTRK2,PLCE1,NGF,AFAP1L2,NEDD9,RELN,NOS1,SLC27A1,PRR5L,TEC,RAPGEF3,FAXDC2,DIPK2A,PRR5
1.YC/0.HA	Immature	Up	GO BP	GOBP_POSITIVE_REGULATION_OF_NEURON_PROJECTION_DEVELOPMENT	GOBP_POSITIVE_REGULATION_OF_NEURON_PROJECTION_DEVELOPMENT	1.23684	0.0193114	0.246254	ROR2,CUX2,NTRK2,NFE2L2,COBL,EEF2K,RELN,NDNF,TRIM67
1.YC/0.HA	Immature	Down	GO BP	GOBP_REGULATION_OF_SYNAPSE_STRUCTURE_OR_ACTIVITY	GOBP_REGULATION_OF_SYNAPSE_STRUCTURE_OR_ACTIVITY	2.59586	9.10459e-07	0.00495745	DCTN1,EPHA7,SYNGAP1,SLITRK3,FLRT3,BDNF,SLIT1,PPFIA2,GPC4,CAMK1,SLC17A7,NEUROD2,C1QL3
1.YC/0.HA	Immature	Down	GO BP	GOBP_SYNAPTIC_SIGNALING	GOBP_SYNAPTIC_SIGNALING	1.68147	5.24655e-06	0.0142837	ADRA1A,SYNGAP1,RPL22,NPTX1,BDNF,PPFIA2,CPNE6,CPLX2,NCS1,CALB1,PRR7,NCDN,P2RX2,CACNA1E,SLC17A7,SNCB,KCNC4,JPH4,NEUROD2,HTR4,PDYN,NPTXR,NPTX2
1.YC/0.HA	Immature	Down	GO BP	GOBP_CELL_PROJECTION_ORGANIZATION	GOBP_CELL_PROJECTION_ORGANIZATION	1.22924	3.53171e-05	0.0641005	MNS1,SLIT3,CFAP43,DCTN1,EPHA7,SYNGAP1,DNAAF1,DEUP1,NUBP1,HYDIN,PARD3,JHY,TPM1,POSTN,SLITRK3,FLRT3,NPTX1,SS18L2,BDNF,CXCL12,BCL11B,SLIT1,THY1,PPFIA2,CPNE6,PLPPR4,FAT4,NCS1,TEKT1,EHD3,LCA5,NCDN,CAMK1,DNAH9,FRMD7,GPRIN1
1.YC/0.HA	Immature	Down	GO BP	GOBP_EAR_DEVELOPMENT	GOBP_EAR_DEVELOPMENT	2.24508	0.000104839	0.126264	GSDME,USH2A,PLPPR4,FAT4,JAG1,CALB1,NEUROD1,SLC4A7,TSHZ1,MYO3B
1.YC/0.HA	Immature	Down	GO BP	GOBP_NEURON_DIFFERENTIATION	GOBP_NEURON_DIFFERENTIATION	1.18084	0.000130896	0.126264	CHD5,SLIT3,GSDME,EPHA7,SYNGAP1,PARD3,POSTN,SLITRK3,FLRT3,NPTX1,SS18L2,BDNF,CXCL12,BCL11B,SLIT1,THY1,USH2A,PPFIA2,CPNE6,PLPPR4,FAT4,JAG1,NCS1,NEUROD1,CNGB1,NCDN,CAMK1,SLC4A7,NEUROD2,FRMD7,GPRIN1
1.YC/0.HA	Immature	Down	GO BP	GOBP_NEURON_DEVELOPMENT	GOBP_NEURON_DEVELOPMENT	1.26033	0.000152691	0.126264	SLIT3,EPHA7,SYNGAP1,PARD3,POSTN,SLITRK3,FLRT3,NPTX1,SS18L2,BDNF,CXCL12,BCL11B,SLIT1,THY1,PPFIA2,CPNE6,PLPPR4,FAT4,NCS1,NEUROD1,CNGB1,NCDN,CAMK1,SLC4A7,NEUROD2,FRMD7,GPRIN1
1.YC/0.HA	Immature	Down	GO BP	GOBP_NEGATIVE_REGULATION_OF_SYNAPSE_ORGANIZATION	GOBP_NEGATIVE_REGULATION_OF_SYNAPSE_ORGANIZATION	5.24435	0.000162323	0.126264	EPHA7,SLIT1,NEUROD2
1.YC/0.HA	Immature	Down	GO BP	GOBP_REGULATION_OF_TRANS_SYNAPTIC_SIGNALING	GOBP_REGULATION_OF_TRANS_SYNAPTIC_SIGNALING	1.72718	0.000208556	0.141948	ADRA1A,SYNGAP1,RPL22,NPTX1,BDNF,PPFIA2,CPLX2,NCS1,CALB1,NCDN,JPH4,NEUROD2,NPTXR,NPTX2
1.YC/0.HA	Immature	Down	GO BP	GOBP_SYNAPSE_ORGANIZATION	GOBP_SYNAPSE_ORGANIZATION	1.70456	0.000242607	0.146777	DCTN1,EPHA7,SYNGAP1,SLITRK3,FLRT3,BDNF,SLIT1,PPFIA2,GPC4,CAMK1,P2RX2,SNCB,NEUROD2,C1QL3
3.AD/0.HA	Immature	Down	GO BP	GOBP_COTRANSLATIONAL_PROTEIN_TARGETING_TO_MEMBRANE	GOBP_COTRANSLATIONAL_PROTEIN_TARGETING_TO_MEMBRANE	6.74502	8.65146e-89	4.71072e-85	RPL29,RPL3,RPL5,RPL6,RPL10,RPL11,RPL23A,RPL24,RPL38,RPLP0,RPSA,RPS10,RPS14,RPS15,RPS19,RPS27,RPL26,RPS27A,RPL23,RPS3,RPL35,RPL13A,RPL10A,RPL7,RPL7A,RPL8,RPL9,RPL12,RPL13,RPL15,RPL17,RPL18A,RPL19,RPL21,RPL22,RPL27,RPL30,RPL28,RPL31,RPL32,RPL34,RPL35A,RPL37,RPL37A,RPL39,RPL41,RPL36A,RPLP1,RPS2,RPS3A,RPS4X,RPS7,RPS8,RPS11,RPS12,RPS13,RPS16,RPS18,RPS21,RPS23,RPS24,RPS25,RPS26,RPS29,RPL14,SRPRA,SEC62
3.AD/0.HA	Immature	Down	GO BP	GOBP_ESTABLISHMENT_OF_PROTEIN_LOCALIZATION_TO_ENDOPLASMIC_RETICULUM	GOBP_ESTABLISHMENT_OF_PROTEIN_LOCALIZATION_TO_ENDOPLASMIC_RETICULUM	6.28369	2.77431e-83	7.55307e-80	RPL29,RPL3,RPL5,RPL6,RPL10,RPL11,RPL23A,RPL24,RPL38,RPLP0,RPSA,RPS10,RPS14,RPS15,RPS19,RPS27,RPL26,RPS27A,RPL23,RPS3,RPL35,RPL13A,RPL10A,RPL7,RPL7A,RPL8,RPL9,RPL12,RPL13,RPL15,RPL17,RPL18A,RPL19,RPL21,RPL22,RPL27,RPL30,RPL28,RPL31,RPL32,RPL34,RPL35A,RPL37,RPL37A,RPL39,RPL41,RPL36A,RPLP1,RPS2,RPS3A,RPS4X,RPS7,RPS8,RPS11,RPS12,RPS13,RPS16,RPS18,RPS21,RPS23,RPS24,RPS25,RPS26,RPS29,RPL14,SRPRA,SEC62
3.AD/0.HA	Immature	Down	GO BP	GOBP_NUCLEAR_TRANSCRIBED_MRNA_CATABOLIC_PROCESS_NONSENSE_MEDIATED_DECAY	GOBP_NUCLEAR_TRANSCRIBED_MRNA_CATABOLIC_PROCESS_NONSENSE_MEDIATED_DECAY	6.1203	7.23829e-79	1.31375e-75	RPL29,RPL3,RPL5,RPL6,RPL10,RPL11,RPL23A,RPL24,RPL38,RPLP0,RPSA,RPS10,RPS14,RPS15,RPS19,RPS27,RPL26,RPS27A,RPL23,RPS3,RPL35,RPL13A,RPL10A,RPL7,RPL7A,RPL8,RPL9,RPL12,RPL13,RPL15,RPL17,RPL18A,RPL19,RPL21,RPL22,RPL27,RPL30,RPL28,RPL31,RPL32,RPL34,RPL35A,RPL37,RPL37A,RPL39,RPL41,RPL36A,RPLP1,RPS2,RPS3A,RPS4X,RPS7,RPS8,RPS11,RPS12,RPS13,RPS16,RPS18,RPS21,RPS23,RPS24,RPS25,RPS26,RPS29,RPL14
3.AD/0.HA	Immature	Down	GO BP	GOBP_PROTEIN_LOCALIZATION_TO_ENDOPLASMIC_RETICULUM	GOBP_PROTEIN_LOCALIZATION_TO_ENDOPLASMIC_RETICULUM	5.71552	8.09074e-77	1.10135e-73	RPL29,RPL3,RPL5,RPL6,RPL10,RPL11,RPL23A,RPL24,RPL38,RPLP0,RPSA,RPS10,RPS14,RPS15,RPS19,RPS27,RPL26,RPS27A,RPL23,RPS3,RPL35,RPL13A,RPL10A,RPL7,RPL7A,RPL8,RPL9,RPL12,RPL13,RPL15,RPL17,RPL18A,RPL19,RPL21,RPL22,RPL27,RPL30,RPL28,RPL31,RPL32,RPL34,RPL35A,RPL37,RPL37A,RPL39,RPL41,RPL36A,RPLP1,RPS2,RPS3A,RPS4X,RPS7,RPS8,RPS11,RPS12,RPS13,RPS16,RPS18,RPS21,RPS23,RPS24,RPS25,RPS26,RPS29,RPL14,GABARAPL2,SR…
3.AD/0.HA	Immature	Down	GO BP	GOBP_PROTEIN_TARGETING_TO_MEMBRANE	GOBP_PROTEIN_TARGETING_TO_MEMBRANE	4.96327	2.15439e-67	2.34613e-64	RPL29,RPL3,RPL5,RPL6,RPL10,RPL11,RPL23A,RPL24,RPL38,RPLP0,RPSA,RPS10,RPS14,RPS15,RPS19,RPS27,RPL26,RPS27A,RPL23,RPS3,RPL35,RPL13A,RPL10A,RPL7,RPL7A,RPL8,RPL9,RPL12,RPL13,RPL15,RPL17,RPL18A,RPL19,RPL21,RPL22,RPL27,RPL30,RPL28,RPL31,RPL32,RPL34,RPL35A,RPL37,RPL37A,RPL39,RPL41,RPL36A,RPLP1,RPS2,RPS3A,RPS4X,RPS7,RPS8,RPS11,RPS12,RPS13,RPS16,RPS18,RPS21,RPS23,RPS24,RPS25,RPS26,RPS29,RPL14,ZDHHC15,PRNP…
3.AD/0.HA	Immature	Down	GO BP	GOBP_VIRAL_GENE_EXPRESSION	GOBP_VIRAL_GENE_EXPRESSION	4.99243	5.93806e-67	5.38879e-64	RPL29,RPL3,RPL5,RPL6,RPL10,RPL11,RPL23A,RPL24,RPL38,RPLP0,RPSA,RPS10,RPS14,RPS15,RPS19,RPS27,RPL26,RPS27A,RPL23,PSMC3,RPS3,RPL35,RPL13A,RPL10A,RPL7,RPL7A,RPL8,RPL9,RPL12,RPL13,RPL15,RPL17,RPL18A,RPL19,RPL21,RPL22,RPL27,RPL30,RPL28,RPL31,RPL32,RPL34,RPL35A,RPL37,RPL37A,RPL39,RPL41,RPL36A,RPLP1,RPS2,RPS3A,RPS4X,RPS7,RPS8,RPS11,RPS12,RPS13,RPS16,RPS18,RPS21,RPS23,RPS24,RPS25,RPS26,RPS29,RPL14,POLR2I…
3.AD/0.HA	Immature	Down	GO BP	GOBP_TRANSLATIONAL_INITIATION	GOBP_TRANSLATIONAL_INITIATION	4.89635	7.27249e-62	5.65696e-59	RPL29,RPL3,RPL5,RPL6,RPL10,RPL11,RPL23A,RPL24,RPL38,RPLP0,RPSA,RPS10,RPS14,RPS15,RPS19,RPS27,RPL26,RPS27A,RPL23,RPS3,RPL35,RPL13A,RPL10A,RPL7,RPL7A,RPL8,RPL9,RPL12,RPL13,RPL15,RPL17,RPL18A,RPL19,RPL21,RPL22,RPL27,RPL30,RPL28,RPL31,RPL32,RPL34,RPL35A,RPL37,RPL37A,RPL39,RPL41,RPL36A,RPLP1,RPS2,RPS3A,RPS4X,RPS7,RPS8,RPS11,RPS12,RPS13,RPS16,RPS18,RPS21,RPS23,RPS24,RPS25,RPS26,RPS29,RPL14
3.AD/0.HA	Immature	Down	GO BP	GOBP_NUCLEAR_TRANSCRIBED_MRNA_CATABOLIC_PROCESS	GOBP_NUCLEAR_TRANSCRIBED_MRNA_CATABOLIC_PROCESS	4.78407	5.11076e-61	3.47851e-58	RPL29,RPL3,RPL5,RPL6,RPL10,RPL11,RPL23A,RPL24,RPL38,RPLP0,RPSA,RPS10,RPS14,RPS15,RPS19,RPS27,RPL26,RPS27A,RPL23,RPS3,RPL35,RPL13A,RPL10A,RPL7,RPL7A,RPL8,RPL9,RPL12,RPL13,RPL15,RPL17,RPL18A,RPL19,RPL21,RPL22,RPL27,RPL30,RPL28,RPL31,RPL32,RPL34,RPL35A,RPL37,RPL37A,RPL39,RPL41,RPL36A,RPLP1,RPS2,RPS3A,RPS4X,RPS7,RPS8,RPS11,RPS12,RPS13,RPS16,RPS18,RPS21,RPS23,RPS24,RPS25,RPS26,RPS29,RPL14,WDR61
3.AD/0.HA	Immature	Down	GO BP	GOBP_ESTABLISHMENT_OF_PROTEIN_LOCALIZATION_TO_MEMBRANE	GOBP_ESTABLISHMENT_OF_PROTEIN_LOCALIZATION_TO_MEMBRANE	4.15157	1.77957e-59	1.07664e-56	RPL29,RPL3,RPL5,RPL6,RPL10,RPL11,RPL23A,RPL24,RPL38,RPLP0,RPSA,RPS10,RPS14,RPS15,RPS19,RPS27,RPL26,RPS27A,RPL23,RPS3,YWHAB,RPL35,RPL13A,RPL10A,RPL7,RPL7A,RPL8,RPL9,RPL12,RPL13,RPL15,RPL17,RPL18A,RPL19,RPL21,RPL22,RPL27,RPL30,RPL28,RPL31,RPL32,RPL34,RPL35A,RPL37,RPL37A,RPL39,RPL41,RPL36A,RPLP1,RPS2,RPS3A,RPS4X,RPS7,RPS8,RPS11,RPS12,RPS13,RPS16,RPS18,RPS21,RPS23,RPS24,RPS25,RPS26,RPS29,RPL14,RACK1,…
3.AD/0.HA	Immature	Down	GO BP	GOBP_PROTEIN_TARGETING	GOBP_PROTEIN_TARGETING	3.84911	3.48682e-56	1.89857e-53	DNAJC19,RPL29,UBB,RPL3,RPL5,RPL6,RPL10,RPL11,RPL23A,RPL24,RPL38,RPLP0,RPSA,RPS10,RPS14,RPS15,RPS19,RPS27,RPL26,RPS27A,UBC,RPL23,RPS3,YWHAB,RPL35,RPL13A,RPL10A,RPL7,RPL7A,RPL8,RPL9,RPL12,RPL13,RPL15,RPL17,RPL18A,RPL19,RPL21,RPL22,RPL27,RPL30,RPL28,RPL31,RPL32,RPL34,RPL35A,RPL37,RPL37A,RPL39,RPL41,RPL36A,RPLP1,RPS2,RPS3A,RPS4X,RPS7,RPS8,RPS11,RPS12,RPS13,RPS16,RPS18,RPS21,RPS23,RPS24,RPS25,RPS26,RP…
3.AD/0.HA	Immature	Down	GO BP	GOBP_ESTABLISHMENT_OF_PROTEIN_LOCALIZATION_TO_ORGANELLE	GOBP_ESTABLISHMENT_OF_PROTEIN_LOCALIZATION_TO_ORGANELLE	3.42	1.31106e-48	6.48973e-46	DNAJC19,HSP90AB1,RPL29,UBB,RPL3,RPL5,RPL6,RPL10,RPL11,RPL23A,RPL24,RPL38,RPLP0,RPSA,RPS10,RPS14,RPS15,RPS19,RPS27,RPL26,RPS27A,UBC,RPL23,RPS3,YWHAB,RPL35,RPL13A,RPL10A,RPL7,RPL7A,RPL8,RPL9,RPL12,RPL13,RPL15,RPL17,RPL18A,RPL19,RPL21,RPL22,RPL27,RPL30,RPL28,RPL31,RPL32,RPL34,RPL35A,RPL37,RPL37A,RPL39,RPL41,RPL36A,RPLP1,RPS2,RPS3A,RPS4X,RPS7,RPS8,RPS11,RPS12,RPS13,RPS16,RPS18,RPS21,RPS23,RPS24,RPS25…
3.AD/0.HA	Immature	Down	GO BP	GOBP_RNA_CATABOLIC_PROCESS	GOBP_RNA_CATABOLIC_PROCESS	3.67879	1.41005e-47	6.39809e-45	RPL29,UBB,RPL3,RPL5,RPL6,RPL10,RPL11,RPL23A,RPL24,RPL38,RPLP0,RPSA,RPS10,RPS14,RPS15,RPS19,RPS27,RPL26,RPS27A,UBC,RPL23,PSMB6,PSMC3,RPS3,YWHAB,RPL35,RPL13A,RPL10A,RPL7,RPL7A,RPL8,RPL9,RPL12,RPL13,RPL15,RPL17,RPL18A,RPL19,RPL21,RPL22,RPL27,RPL30,RPL28,RPL31,RPL32,RPL34,RPL35A,RPL37,RPL37A,RPL39,RPL41,RPL36A,RPLP1,RPS2,RPS3A,RPS4X,RPS7,RPS8,RPS11,RPS12,RPS13,RPS16,RPS18,RPS21,RPS23,RPS24,RPS25,RPS2…
3.AD/0.HA	Immature	Down	GO BP	GOBP_PROTEIN_LOCALIZATION_TO_MEMBRANE	GOBP_PROTEIN_LOCALIZATION_TO_MEMBRANE	3.2347	9.06952e-46	3.79873e-43	PTN,RPL29,RPL3,RPL5,RPL6,RPL10,RPL11,RPL23A,RPL24,RPL38,RPLP0,RPSA,RPS10,RPS14,RPS15,RPS19,RPS27,RPL26,RPS27A,RPL23,RPS3,YWHAB,RPL35,RPL13A,RPL10A,RPL7,RPL7A,RPL8,RPL9,RPL12,RPL13,RPL15,RPL17,RPL18A,RPL19,RPL21,RPL22,RPL27,RPL30,RPL28,RPL31,RPL32,RPL34,RPL35A,RPL37,RPL37A,RPL39,RPL41,RPL36A,RPLP1,RPS2,RPS3A,RPS4X,RPS7,RPS8,RPS11,RPS12,RPS13,RPS16,RPS18,RPS21,RPS23,RPS24,RPS25,RPS26,RPS29,RPL14,SS…
3.AD/0.HA	Immature	Down	GO BP	GOBP_PEPTIDE_BIOSYNTHETIC_PROCESS	GOBP_PEPTIDE_BIOSYNTHETIC_PROCESS	3.14399	1.0574e-41	4.11253e-39	RPL29,RPL3,RPL5,RPL6,RPL10,RPL11,RPL23A,RPL24,RPL38,RPLP0,RPSA,RPS27L,MRPS7,RPS10,RPS14,RPS15,RPS19,RPS27,RPL26,RPS27A,PER2,RPL23,RPS3,RPL35,RPL13A,RPL10A,RPL7,RPL7A,RPL8,RPL9,RPL12,RPL13,RPL15,RPL17,RPL18A,RPL19,RPL21,RPL22,RPL27,RPL30,RPL28,RPL31,RPL32,RPL34,RPL35A,RPL37,RPL37A,RPL39,RPL41,RPL36A,RPLP1,RPS2,RPS3A,RPS4X,RPS7,RPS8,RPS11,RPS12,RPS13,RPS16,RPS18,RPS21,RPS23,RPS24,RPS25,RPS26,RPS29,…
3.AD/0.HA	Immature	Down	GO BP	GOBP_ORGANIC_CYCLIC_COMPOUND_CATABOLIC_PROCESS	GOBP_ORGANIC_CYCLIC_COMPOUND_CATABOLIC_PROCESS	3.10755	4.00279e-40	1.45301e-37	RPL29,UBB,RPL3,RPL5,RPL6,RPL10,RPL11,RPL23A,RPL24,RPL38,RPLP0,RPSA,RPS10,RPS14,RPS15,RPS19,RPS27,MT3,RPL26,RPS27A,UBC,RPL23,PSMB6,PSMC3,RPS3,YWHAB,RPL35,RPL13A,RPL10A,RPL7,RPL7A,RPL8,RPL9,RPL12,RPL13,RPL15,RPL17,RPL18A,RPL19,RPL21,RPL22,RPL27,RPL30,RPL28,RPL31,RPL32,RPL34,RPL35A,RPL37,RPL37A,RPL39,RPL41,RPL36A,RPLP1,RPS2,RPS3A,RPS4X,RPS7,RPS8,RPS11,RPS12,RPS13,RPS16,RPS18,RPS21,RPS23,RPS24,RPS25,…
3.AD/0.HA	Immature	Down	GO BP	GOBP_PEPTIDE_METABOLIC_PROCESS	GOBP_PEPTIDE_METABOLIC_PROCESS	2.93579	4.79828e-40	1.63291e-37	RPL29,SOD1,RPL3,RPL5,RPL6,RPL10,RPL11,RPL23A,RPL24,RPL38,RPLP0,RPSA,RPS27L,MRPS7,RPS10,RPS14,RPS15,RPS19,RPS27,RPL26,RPS27A,PER2,RPL23,ATP6AP2,CTSH,GSTP1,RPS3,RPL35,RPL13A,RPL10A,RPL7,RPL7A,RPL8,RPL9,RPL12,RPL13,RPL15,RPL17,RPL18A,RPL19,RPL21,RPL22,RPL27,RPL30,RPL28,RPL31,RPL32,RPL34,RPL35A,RPL37,RPL37A,RPL39,RPL41,RPL36A,RPLP1,RPS2,RPS3A,RPS4X,RPS7,RPS8,RPS11,RPS12,RPS13,RPS16,RPS18,RPS21,RPS23,…
3.AD/0.HA	Immature	Down	GO BP	GOBP_BIOLOGICAL_PROCESS_INVOLVED_IN_SYMBIOTIC_INTERACTION	GOBP_BIOLOGICAL_PROCESS_INVOLVED_IN_SYMBIOTIC_INTERACTION	2.7169	5.71773e-38	1.83135e-35	HSP90AB1,RPL29,UBB,DYNLL1,RPL3,RPL5,RPL6,RPL10,RPL11,RPL23A,RPL24,RPL38,RPLP0,RPSA,RPS10,RPS14,RPS15,RPS19,RPS27,ATP6V0C,B2M,RPL26,RPS27A,STAT1,UBC,RPL23,HTR2A,PPIA,PSMB6,PSMC3,RPS3,YWHAB,RPL35,RPL13A,RPL10A,RPL7,RPL7A,RPL8,RPL9,RPL12,RPL13,RPL15,RPL17,RPL18A,RPL19,RPL21,RPL22,RPL27,RPL30,RPL28,RPL31,RPL32,RPL34,RPL35A,RPL37,RPL37A,RPL39,RPL41,RPL36A,RPLP1,RPS2,RPS3A,RPS4X,RPS7,RPS8,RPS11,RPS12,R…
3.AD/0.HA	Immature	Down	GO BP	GOBP_AMIDE_BIOSYNTHETIC_PROCESS	GOBP_AMIDE_BIOSYNTHETIC_PROCESS	2.83922	3.05422e-36	9.23902e-34	RPL29,RPL3,RPL5,RPL6,RPL10,RPL11,RPL23A,RPL24,RPL38,RPLP0,RPSA,RPS27L,MRPS7,RPS10,RPS14,RPS15,RPS19,RPS27,TECR,RPL26,RPS27A,PER2,RPL23,RPS3,RPL35,RPL13A,RPL10A,RPL7,RPL7A,RPL8,RPL9,RPL12,RPL13,RPL15,RPL17,RPL18A,RPL19,RPL21,RPL22,RPL27,RPL30,RPL28,RPL31,RPL32,RPL34,RPL35A,RPL37,RPL37A,RPL39,RPL41,RPL36A,RPLP1,RPS2,RPS3A,RPS4X,RPS7,RPS8,RPS11,RPS12,RPS13,RPS16,RPS18,RPS21,RPS23,RPS24,RPS25,RPS26,R…
3.AD/0.HA	Immature	Down	GO BP	GOBP_INTRACELLULAR_PROTEIN_TRANSPORT	GOBP_INTRACELLULAR_PROTEIN_TRANSPORT	2.55564	1.02797e-35	2.94594e-33	IFT27,DNAJC19,HSP90AB1,RPL29,UBB,DYNLL1,RPL3,RPL5,RPL6,RPL10,RPL11,RPL23A,RPL24,RPL38,RPLP0,RPSA,RPS10,RPS14,RPS15,RPS19,RPS27,RPL26,RPS27A,UBC,RPL23,ERP29,RPS3,YWHAB,RPL35,RPL13A,RPL10A,RPL7,RPL7A,RPL8,RPL9,RPL12,RPL13,RPL15,RPL17,RPL18A,RPL19,RPL21,RPL22,RPL27,RPL30,RPL28,RPL31,RPL32,RPL34,RPL35A,RPL37,RPL37A,RPL39,RPL41,RPL36A,RPLP1,RPS2,RPS3A,RPS4X,RPS7,RPS8,RPS11,RPS12,RPS13,RPS16,RPS18,RPS2…
3.AD/0.HA	Immature	Down	GO BP	GOBP_PROTEIN_LOCALIZATION_TO_ORGANELLE	GOBP_PROTEIN_LOCALIZATION_TO_ORGANELLE	2.64741	1.53929e-35	4.19073e-33	DNAJC19,CTNNA1,HSP90AB1,RPL29,UBB,TERF2IP,RPL3,RPL5,RPL6,RPL10,RPL11,RPL23A,RPL24,RPL38,RPLP0,RPSA,RPS10,RPS14,RPS15,RPS19,RPS27,ATP6V1D,RPL26,CTCF,RPS27A,UBC,RPL23,HTR2A,RPS3,YWHAB,RPL35,RPL13A,RPL10A,RPL7,RPL7A,RPL8,RPL9,RPL12,RPL13,RPL15,RPL17,RPL18A,RPL19,RPL21,RPL22,RPL27,RPL30,RPL28,RPL31,RPL32,RPL34,RPL35A,RPL37,RPL37A,RPL39,RPL41,RPL36A,RPLP1,RPS2,RPS3A,RPS4X,RPS7,RPS8,RPS11,RPS12,RPS13,R…
3.AD/0.HA	Immature	Down	GO BP	GOBP_CELLULAR_AMIDE_METABOLIC_PROCESS	GOBP_CELLULAR_AMIDE_METABOLIC_PROCESS	2.49502	3.8172e-32	9.89747e-30	GNPDA1,RPL29,SOD1,RPL3,RPL5,RPL6,RPL10,RPL11,RPL23A,RPL24,RPL38,RPLP0,RPSA,RPS27L,MRPS7,RPS10,RPS14,RPS15,RPS19,RPS27,TECR,RPL26,RPS27A,PER2,RPL23,ATP6AP2,CTSH,GSTP1,RPS3,RPL35,RPL13A,RPL10A,RPL7,RPL7A,RPL8,RPL9,RPL12,RPL13,RPL15,RPL17,RPL18A,RPL19,RPL21,RPL22,RPL27,RPL30,RPL28,RPL31,RPL32,RPL34,RPL35A,RPL37,RPL37A,RPL39,RPL41,RPL36A,RPLP1,RPS2,RPS3A,RPS4X,RPS7,RPS8,RPS11,RPS12,RPS13,RPS16,RPS18,…
3.AD/0.HA	Immature	Down	GO BP	GOBP_MRNA_METABOLIC_PROCESS	GOBP_MRNA_METABOLIC_PROCESS	2.63873	8.42886e-32	2.08614e-29	RPL29,UBB,RPL3,RPL5,RPL6,RPL10,RPL11,RPL23A,RPL24,RPL38,RPLP0,RPSA,RPS10,RPS14,RPS15,RPS19,RPS27,SYF2,RPL26,RPS27A,UBC,RPL23,PSMB6,PSMC3,RPS3,YWHAB,RPL35,RPL13A,RPL10A,RPL7,RPL7A,RPL8,RPL9,RPL12,RPL13,RPL15,RPL17,RPL18A,RPL19,RPL21,RPL22,RPL27,RPL30,RPL28,RPL31,RPL32,RPL34,RPL35A,RPL37,RPL37A,RPL39,RPL41,RPL36A,RPLP1,RPS2,RPS3A,RPS4X,RPS7,RPS8,RPS11,RPS12,RPS13,RPS16,RPS18,RPS21,RPS23,RPS24,RPS25…
3.AD/0.HA	Immature	Down	GO BP	GOBP_INTRACELLULAR_TRANSPORT	GOBP_INTRACELLULAR_TRANSPORT	2.1976	2.71378e-31	6.42459e-29	IFT27,DNAJC19,HSP90AB1,RPL29,SOD1,UBB,DYNLL1,RPL3,RPL5,RPL6,RPL10,RPL11,RPL23A,RPL24,RPL38,RPLP0,RPSA,RPS10,RPS14,RPS15,RPS19,RPS27,RPL26,RPS27A,UBC,RPL23,ERP29,NEFL,RPS3,YWHAB,RPL35,RPL13A,RPL10A,RPL7,RPL7A,RPL8,RPL9,RPL12,RPL13,RPL15,RPL17,RPL18A,RPL19,RPL21,RPL22,RPL27,RPL30,RPL28,RPL31,RPL32,RPL34,RPL35A,RPL37,RPL37A,RPL39,RPL41,RPL36A,RPLP1,RPS2,RPS3A,RPS4X,RPS7,RPS8,RPS11,RPS12,RPS13,RPS16,…
3.AD/0.HA	Immature	Down	GO BP	GOBP_NEGATIVE_REGULATION_OF_GENE_EXPRESSION	GOBP_NEGATIVE_REGULATION_OF_GENE_EXPRESSION	2.38914	1.59806e-29	3.62559e-27	HSP90AB1,PLAG1,RPL29,UBB,RPL3,RPL5,RPL6,RPL10,RPL11,RPL23A,RPL24,RPL38,RPLP0,RPSA,RPS10,RPS14,RPS15,RPS19,RPS27,RPL26,RPS27A,UBC,RPL23,ERP29,GSTP1,HGF,MIF,PSMB6,PSMC3,RPS3,YWHAB,RPL35,RPL13A,RPL10A,RPL7,RPL7A,RPL8,RPL9,RPL12,RPL13,RPL15,RPL17,RPL18A,RPL19,RPL21,RPL22,RPL27,RPL30,RPL28,RPL31,RPL32,RPL34,RPL35A,RPL37,RPL37A,RPL39,RPL41,RPL36A,RPLP1,RPS2,RPS3A,RPS4X,RPS7,RPS8,RPS11,RPS12,RPS13,RPS16…
3.AD/0.HA	Immature	Down	GO BP	GOBP_CELLULAR_MACROMOLECULE_LOCALIZATION	GOBP_CELLULAR_MACROMOLECULE_LOCALIZATION	2.02061	8.50837e-28	1.85312e-25	IFT27,DNAJC19,CTNNA1,HSP90AB1,PTN,RPL29,UBB,DYNLL1,TERF2IP,RPL3,RPL5,RPL6,RPL10,RPL11,RPL23A,RPL24,RPL38,RPLP0,RPSA,RPS10,RPS14,RPS15,RPS19,RPS27,ATP6V1D,RPL26,CTCF,RPS27A,UBC,RPL23,ERP29,ERBB4,HTR2A,RPS3,YWHAB,RPL35,RPL13A,RPL10A,RPL7,RPL7A,RPL8,RPL9,RPL12,RPL13,RPL15,RPL17,RPL18A,RPL19,RPL21,RPL22,RPL27,RPL30,RPL28,RPL31,RPL32,RPL34,RPL35A,RPL37,RPL37A,RPL39,RPL41,RPL36A,RPLP1,RPS2,RPS3A,RPS4X,…
3.AD/0.HA	Immature	Down	GO BP	GOBP_ORGANONITROGEN_COMPOUND_BIOSYNTHETIC_PROCESS	GOBP_ORGANONITROGEN_COMPOUND_BIOSYNTHETIC_PROCESS	2.09465	1.19356e-27	2.49959e-25	RPL29,RPL3,RPL5,RPL6,RPL10,RPL11,RPL23A,RPL24,RPL38,RPLP0,RPSA,RPS27L,MRPS7,RPS10,RPS14,RPS15,RPS19,RPS27,HACD4,TECR,MT3,ATP6V0C,RPL26,MTAP,RPS27A,PER2,RPL23,GSTP1,RPS3,RPL35,RPL13A,RPL10A,RPL7,RPL7A,RPL8,RPL9,RPL12,RPL13,RPL15,RPL17,RPL18A,RPL19,RPL21,RPL22,RPL27,RPL30,RPL28,RPL31,RPL32,RPL34,RPL35A,RPL37,RPL37A,RPL39,RPL41,RPL36A,RPLP1,RPS2,RPS3A,RPS4X,RPS7,RPS8,RPS11,RPS12,RPS13,RPS16,RPS18,RP…
3.AD/0.HA	Immature	Down	GO BP	GOBP_ESTABLISHMENT_OF_PROTEIN_LOCALIZATION	GOBP_ESTABLISHMENT_OF_PROTEIN_LOCALIZATION	2.00873	2.29367e-27	4.62557e-25	UNC13B,IFT27,DNAJC19,HSP90AB1,RPL29,UBB,DYNLL1,RPL3,RPL5,RPL6,RPL10,RPL11,RPL23A,RPL24,RPL38,RPLP0,RPSA,RPS10,RPS14,RPS15,RPS19,RPS27,ATP6V1D,ATP6V0C,ATP6V0B,ATP6AP1,ATP6V1F,RPL26,RPS27A,UBC,PER2,RPL23,ERP29,PPIA,RPS3,YWHAB,RPL35,RPL13A,RPL10A,RPL7,RPL7A,RPL8,RPL9,RPL12,RPL13,RPL15,RPL17,RPL18A,RPL19,RPL21,RPL22,RPL27,RPL30,RPL28,RPL31,RPL32,RPL34,RPL35A,RPL37,RPL37A,RPL39,RPL41,RPL36A,RPLP1,RPS2…
3.AD/0.HA	Immature	Down	GO BP	GOBP_CYTOPLASMIC_TRANSLATION	GOBP_CYTOPLASMIC_TRANSLATION	4.40803	1.0942e-25	2.12784e-23	RPL29,RPL6,RPL11,RPL24,RPL38,RPLP0,RPSA,RPL26,RPL13A,RPL10A,RPL8,RPL9,RPL15,RPL17,RPL18A,RPL19,RPL22,RPL30,RPL31,RPL32,RPL35A,RPL39,RPL41,RPL36A,RPLP1,RPS21,RPS23,RPS26,RPS29
3.AD/0.HA	Immature	Down	GO BP	GOBP_CELLULAR_MACROMOLECULE_CATABOLIC_PROCESS	GOBP_CELLULAR_MACROMOLECULE_CATABOLIC_PROCESS	2.17526	1.37176e-24	2.5756e-22	HSP90AB1,RPL29,UBB,RPL3,RPL5,RPL6,RPL10,RPL11,RPL23A,RPL24,RPL38,RPLP0,RPSA,RPS10,RPS14,RPS15,RPS19,RPS27,RPL26,RPS27A,UBC,RPL23,CTSH,PSMB6,PSMC3,RPS3,YWHAB,RPL35,RPL13A,RPL10A,RPL7,RPL7A,RPL8,RPL9,RPL12,RPL13,RPL15,RPL17,RPL18A,RPL19,RPL21,RPL22,RPL27,RPL30,RPL28,RPL31,RPL32,RPL34,RPL35A,RPL37,RPL37A,RPL39,RPL41,RPL36A,RPLP1,RPS2,RPS3A,RPS4X,RPS7,RPS8,RPS11,RPS12,RPS13,RPS16,RPS18,RPS21,RPS23,RP…
3.AD/0.HA	Immature	Down	GO BP	GOBP_MACROMOLECULE_CATABOLIC_PROCESS	GOBP_MACROMOLECULE_CATABOLIC_PROCESS	2.02321	3.75528e-23	6.81583e-21	HSP90AB1,RPL29,UBB,RPL3,RPL5,RPL6,RPL10,RPL11,RPL23A,RPL24,RPL38,RPLP0,RPSA,RPS10,RPS14,RPS15,RPS19,RPS27,RPL26,RPS27A,UBC,RPL23,CTSH,PSMB6,PSMC3,RPS3,TIMP3,YWHAB,RPL35,RPL13A,RPL10A,RPL7,RPL7A,RPL8,RPL9,RPL12,RPL13,RPL15,RPL17,RPL18A,RPL19,RPL21,RPL22,RPL27,RPL30,RPL28,RPL31,RPL32,RPL34,RPL35A,RPL37,RPL37A,RPL39,RPL41,RPL36A,RPLP1,RPS2,RPS3A,RPS4X,RPS7,RPS8,RPS11,RPS12,RPS13,RPS16,RPS18,RPS21,RP…
3.AD/0.HA	Immature	Down	GO BP	GOBP_OXIDATIVE_PHOSPHORYLATION	GOBP_OXIDATIVE_PHOSPHORYLATION	3.43982	1.51697e-16	2.60054e-14	NDUFC2,UQCR11,NDUFA11,COX4I1,COX5B,COX6A1,COX6B1,COX6C,COX7B,COX7C,COX8A,NDUFA3,NDUFA4,NDUFA5,NDUFB4,NDUFB8,NDUFS6,ATP5F1C,NDUFA13,ATP5F1D,ATP5F1E,ATP5MC1,ATP5ME,NDUFB11,UQCRB
3.AD/0.HA	Immature	Down	GO BP	GOBP_RIBOSOME_ASSEMBLY	GOBP_RIBOSOME_ASSEMBLY	4.39652	1.52833e-16	2.60054e-14	RPL3,RPL5,RPL6,RPL10,RPL11,RPL23A,RPL24,RPL38,RPLP0,RPSA,RPS27L,MRPS7,RPS10,RPS14,RPS15,RPS19,RPS27,SBDS
3.AD/0.HA	Immature	Down	GO BP	GOBP_RIBOSOME_BIOGENESIS	GOBP_RIBOSOME_BIOGENESIS	2.73398	5.1548e-16	8.50542e-14	RPL3,RPL5,RPL6,RPL10,RPL11,RPL23A,RPL24,RPL38,RPLP0,RPSA,RPS27L,MRPS7,RPS10,RPS14,RPS15,RPS19,RPS27,RPL26,RPL35,RPL10A,RPL7,RPL7A,RPL27,RPL35A,RPS2,RPS7,RPS8,RPS16,RPS21,RPS24,RPS25,RPL14,SBDS,RPL7L1
3.AD/0.HA	Immature	Down	GO BP	GOBP_ATP_SYNTHESIS_COUPLED_ELECTRON_TRANSPORT	GOBP_ATP_SYNTHESIS_COUPLED_ELECTRON_TRANSPORT	3.73264	5.13355e-15	8.22124e-13	NDUFC2,UQCR11,NDUFA11,COX4I1,COX5B,COX6A1,COX6B1,COX6C,COX7B,COX7C,COX8A,NDUFA3,NDUFA4,NDUFA5,NDUFB4,NDUFB8,NDUFS6,NDUFA13,NDUFB11,UQCRB
3.AD/0.HA	Immature	Down	GO BP	GOBP_ATP_METABOLIC_PROCESS	GOBP_ATP_METABOLIC_PROCESS	2.59921	3.49595e-14	5.4387e-12	ATP6V0C,HTR2A,GAPDH,ATP1B1,TMSB4X,NDUFC2,PGAM1,ENO2,UQCR11,NDUFA11,COX4I1,COX5B,COX6A1,COX6B1,COX6C,COX7B,COX7C,COX8A,NDUFA3,NDUFA4,NDUFA5,NDUFB4,NDUFB8,NDUFS6,ATP5F1C,NDUFA13,ATP5F1D,ATP5F1E,ATP5MC1,ATP5ME,NDUFB11,UQCRB
3.AD/0.HA	Immature	Down	GO BP	GOBP_RIBOSOMAL_LARGE_SUBUNIT_BIOGENESIS	GOBP_RIBOSOMAL_LARGE_SUBUNIT_BIOGENESIS	3.98031	5.04862e-14	7.63604e-12	RPL3,RPL5,RPL6,RPL10,RPL11,RPL23A,RPL24,RPL38,RPLP0,RPL26,RPL35,RPL10A,RPL7,RPL7A,RPL35A,RPL14,RPL7L1
3.AD/0.HA	Immature	Down	GO BP	GOBP_RESPIRATORY_ELECTRON_TRANSPORT_CHAIN	GOBP_RESPIRATORY_ELECTRON_TRANSPORT_CHAIN	3.44074	1.37285e-13	2.02031e-11	NDUFC2,UQCR11,NDUFA11,COX4I1,COX5B,COX6A1,COX6B1,COX6C,COX7B,COX7C,COX8A,NDUFA3,NDUFA4,NDUFA5,NDUFB4,NDUFB8,NDUFS6,NDUFA13,NDUFB11,UQCRB
3.AD/0.HA	Immature	Down	GO BP	GOBP_RIBONUCLEOPROTEIN_COMPLEX_BIOGENESIS	GOBP_RIBONUCLEOPROTEIN_COMPLEX_BIOGENESIS	2.27159	2.61369e-13	3.74515e-11	HSP90AB1,RPL3,RPL5,RPL6,RPL10,RPL11,RPL23A,RPL24,RPL38,RPLP0,RPSA,RPS27L,MRPS7,RPS10,RPS14,RPS15,RPS19,RPS27,RPL26,RPL35,RPL13A,RPL10A,RPL7,RPL7A,RPL27,RPL35A,RPS2,RPS7,RPS8,RPS16,RPS21,RPS24,RPS25,RPL14,SBDS,RPL7L1,TAF9
3.AD/0.HA	Immature	Down	GO BP	GOBP_PROTON_TRANSMEMBRANE_TRANSPORT	GOBP_PROTON_TRANSMEMBRANE_TRANSPORT	3.00698	5.69543e-12	7.95169e-10	SLC9B1,COX17,ATP6V1D,ATP6V0C,ATP6V0B,ATP6AP1,ATP6V1F,TMSB4X,COX4I1,COX6A1,COX6B1,COX6C,COX7B,COX7C,COX8A,NDUFA4,ATP5F1C,ATP5F1D,ATP5F1E,ATP5MC1,ATP5ME
3.AD/0.HA	Immature	Down	GO BP	GOBP_RIBOSOMAL_SMALL_SUBUNIT_BIOGENESIS	GOBP_RIBOSOMAL_SMALL_SUBUNIT_BIOGENESIS	3.6869	1.72125e-11	2.34306e-09	RPL38,RPSA,RPS27L,MRPS7,RPS10,RPS14,RPS15,RPS19,RPS27,RPS7,RPS8,RPS16,RPS21,RPS24,RPS25
3.AD/0.HA	Immature	Down	GO BP	GOBP_CELLULAR_PROTEIN_CONTAINING_COMPLEX_ASSEMBLY	GOBP_CELLULAR_PROTEIN_CONTAINING_COMPLEX_ASSEMBLY	1.62656	3.694e-11	4.90581e-09	UNC13B,GPX4,HSP90AB1,UBB,RPL3,RPL5,RPL6,RPL10,RPL11,RPL23A,RPL24,RPL38,RPLP0,RPSA,RPS27L,MRPS7,RPS10,RPS14,RPS15,RPS19,RPS27,COX17,RPS27A,UBC,NEFL,PSMC3,RPS3,RPL13A,STMN2,STMN1,ARF1,TAF9,SVIL,VAMP2,TMSB4X,AP2M1,IQGAP2,NDUFC2,NDUFA11,NDUFA3,NDUFA5,NDUFB4,NDUFB8,NDUFS6,NDUFA13,ATP5F1D,NDUFB11,ITGB3BP,NAP1L5,HIGD2A,NDUFAF8,ARPC5L,TMSB10,VMA21
3.AD/0.HA	Immature	Down	GO BP	GOBP_RIBOSOMAL_SMALL_SUBUNIT_ASSEMBLY	GOBP_RIBOSOMAL_SMALL_SUBUNIT_ASSEMBLY	5.46291	4.42331e-11	5.7345e-09	RPL38,RPSA,RPS27L,MRPS7,RPS10,RPS14,RPS15,RPS19,RPS27
3.AD/0.HA	Immature	Down	GO BP	GOBP_ELECTRON_TRANSPORT_CHAIN	GOBP_ELECTRON_TRANSPORT_CHAIN	2.81105	5.51816e-11	6.98753e-09	NDUFC2,UQCR11,FDX2,NDUFA11,COX4I1,COX5B,COX6A1,COX6B1,COX6C,COX7B,COX7C,COX8A,NDUFA3,NDUFA4,NDUFA5,NDUFB4,NDUFB8,NDUFS6,NDUFA13,NDUFB11,UQCRB
3.AD/0.HA	Immature	Down	GO BP	GOBP_MITOCHONDRIAL_ELECTRON_TRANSPORT_CYTOCHROME_C_TO_OXYGEN	GOBP_MITOCHONDRIAL_ELECTRON_TRANSPORT_CYTOCHROME_C_TO_OXYGEN	5.32539	7.8981e-11	9.7739e-09	COX4I1,COX5B,COX6A1,COX6B1,COX6C,COX7B,COX7C,COX8A,NDUFA4
3.AD/0.HA	Immature	Down	GO BP	GOBP_MITOCHONDRION_ORGANIZATION	GOBP_MITOCHONDRION_ORGANIZATION	1.95019	9.68057e-11	1.17135e-08	DNAJC19,COX17,ERBB4,HGF,YWHAB,GABARAP,SOD2,UBL5,GABARAPL2,TOMM7,TSC2,YWHAH,FEZ1,TOMM20,HEBP2,NDUFC2,GGCT,PDCD5,NDUFA11,NDUFA3,NDUFA5,NDUFB4,NDUFB8,NDUFS6,ATP5F1C,NDUFA13,ATP5F1D,ATP5F1E,ATP5MC1,ATP5ME,NDUFB11,TIMM17A,RCC1L,TIMM8B,HIGD2A,MICOS13,NDUFAF8
3.AD/0.HA	Immature	Down	GO BP	GOBP_GENERATION_OF_PRECURSOR_METABOLITES_AND_ENERGY	GOBP_GENERATION_OF_PRECURSOR_METABOLITES_AND_ENERGY	1.95754	1.46347e-10	1.73231e-08	GNPDA1,COX17,MT3,PER2,HTR2A,GAPDH,IL6ST,NDUFC2,PGAM1,ENO2,UQCR11,FDX2,NDUFA11,COX4I1,COX5B,COX6A1,COX6B1,COX6C,COX7B,COX7C,COX8A,NDUFA3,NDUFA4,NDUFA5,NDUFB4,NDUFB8,NDUFS6,ATP5F1C,NDUFA13,ATP5F1D,ATP5F1E,ATP5MC1,ATP5ME,NDUFB11,UQCRB,ACSS3
3.AD/0.HA	Immature	Down	GO BP	GOBP_CELLULAR_RESPIRATION	GOBP_CELLULAR_RESPIRATION	2.70885	1.79048e-10	2.07429e-08	NDUFC2,UQCR11,NDUFA11,COX4I1,COX5B,COX6A1,COX6B1,COX6C,COX7B,COX7C,COX8A,NDUFA3,NDUFA4,NDUFA5,NDUFB4,NDUFB8,NDUFS6,NDUFA13,ATP5F1D,NDUFB11,UQCRB
3.AD/0.HA	Immature	Down	GO BP	GOBP_RRNA_METABOLIC_PROCESS	GOBP_RRNA_METABOLIC_PROCESS	2.46372	5.44896e-10	6.18117e-08	RPL5,RPL11,RPS14,RPS15,RPS19,RPS27,RPL26,RPL35,RPL10A,RPL7,RPL7A,RPL27,RPL35A,RPS2,RPS7,RPS8,RPS16,RPS21,RPS24,RPS25,RPL14,SBDS,RPL7L1
3.AD/0.HA	Immature	Down	GO BP	GOBP_PROTEIN_CONTAINING_COMPLEX_SUBUNIT_ORGANIZATION	GOBP_PROTEIN_CONTAINING_COMPLEX_SUBUNIT_ORGANIZATION	1.27526	6.75904e-10	7.51082e-08	UNC13B,GPX4,HSP90AB1,UBB,RPL3,RPL5,RPL6,RPL10,RPL11,RPL23A,RPL24,RPL38,RPLP0,RPSA,RPS27L,MRPS7,RPS10,RPS14,RPS15,RPS19,RPS27,COX17,B2M,CTCF,RPS27A,UBC,RPL23,MIF,NEFL,PSMC3,RPS3,AIDA,RPL13A,CFL1,STMN2,GABARAP,STMN1,STMN3,ARF1,RACK1,SOD2,GABARAPL2,TAF9,CXCL12,SVIL,VAMP2,P2RY12,TMSB4X,AP2M1,IQGAP2,NDUFC2,PRNP,SHFL,RYR3,NDUFA11,NDUFA3,NDUFA5,NDUFB4,NDUFB8,NDUFS6,NDUFA13,ATP5F1D,NDUFB11,ITGB3BP,NAP1L5…
3.AD/0.HA	Immature	Down	GO BP	GOBP_RIBOSOMAL_LARGE_SUBUNIT_ASSEMBLY	GOBP_RIBOSOMAL_LARGE_SUBUNIT_ASSEMBLY	4.61396	1.94176e-09	2.11457e-07	RPL3,RPL5,RPL6,RPL10,RPL11,RPL23A,RPL24,RPL38,RPLP0
3.AD/0.HA	Immature	Down	GO BP	GOBP_ENERGY_DERIVATION_BY_OXIDATION_OF_ORGANIC_COMPOUNDS	GOBP_ENERGY_DERIVATION_BY_OXIDATION_OF_ORGANIC_COMPOUNDS	2.2872	2.19857e-09	2.34729e-07	MT3,PER2,IL6ST,NDUFC2,UQCR11,NDUFA11,COX4I1,COX5B,COX6A1,COX6B1,COX6C,COX7B,COX7C,COX8A,NDUFA3,NDUFA4,NDUFA5,NDUFB4,NDUFB8,NDUFS6,NDUFA13,ATP5F1D,NDUFB11,UQCRB
3.AD/0.HA	Immature	Down	GO BP	GOBP_RIBONUCLEOPROTEIN_COMPLEX_SUBUNIT_ORGANIZATION	GOBP_RIBONUCLEOPROTEIN_COMPLEX_SUBUNIT_ORGANIZATION	2.48849	5.08776e-09	5.32747e-07	HSP90AB1,RPL3,RPL5,RPL6,RPL10,RPL11,RPL23A,RPL24,RPL38,RPLP0,RPSA,RPS27L,MRPS7,RPS10,RPS14,RPS15,RPS19,RPS27,RPL13A,TAF9
3.AD/0.HA	Immature	Down	GO BP	GOBP_REGULATION_OF_INTRINSIC_APOPTOTIC_SIGNALING_PATHWAY	GOBP_REGULATION_OF_INTRINSIC_APOPTOTIC_SIGNALING_PATHWAY	2.54874	9.34908e-08	9.60485e-06	SOD1,UBB,RPL11,RPL26,ERP29,MIF,PPIA,RPS3,RPS7,CDKN2D,RACK1,SOD2,TAF9,CXCL12,NDUFA13,TPT1
3.AD/0.HA	Immature	Down	GO BP	GOBP_MITOCHONDRIAL_ELECTRON_TRANSPORT_NADH_TO_UBIQUINONE	GOBP_MITOCHONDRIAL_ELECTRON_TRANSPORT_NADH_TO_UBIQUINONE	3.51283	1.02054e-07	1.02904e-05	NDUFC2,NDUFA11,NDUFA3,NDUFA4,NDUFA5,NDUFB4,NDUFB8,NDUFS6,NDUFA13,NDUFB11
3.AD/0.HA	Immature	Down	GO BP	GOBP_NADH_DEHYDROGENASE_COMPLEX_ASSEMBLY	GOBP_NADH_DEHYDROGENASE_COMPLEX_ASSEMBLY	3.1572	7.53473e-07	7.45939e-05	NDUFC2,NDUFA11,NDUFA3,NDUFA5,NDUFB4,NDUFB8,NDUFS6,NDUFA13,NDUFB11,NDUFAF8
3.AD/0.HA	Immature	Down	GO BP	GOBP_AEROBIC_RESPIRATION	GOBP_AEROBIC_RESPIRATION	2.86973	1.25562e-06	0.000122086	COX4I1,COX5B,COX6A1,COX6B1,COX6C,COX7B,COX7C,COX8A,NDUFA4,ATP5F1D,UQCRB
3.AD/0.HA	Immature	Down	GO BP	GOBP_APOPTOTIC_SIGNALING_PATHWAY	GOBP_APOPTOTIC_SIGNALING_PATHWAY	1.45688	5.33271e-06	0.000509414	CTNNA1,SOD1,UBB,RPL11,RPS27L,RPL26,ERP29,GSTP1,HGF,MIF,PPIA,RPS3,TIMP3,YWHAB,RPS7,GABARAP,CDKN2D,RACK1,SOD2,TAF9,CXCL12,YWHAH,IL6R,GGCT,PDCD5,NDUFA13,TPT1,HINT1,IFI27L2
3.AD/0.HA	Immature	Down	GO BP	GOBP_MITOCHONDRIAL_MEMBRANE_ORGANIZATION	GOBP_MITOCHONDRIAL_MEMBRANE_ORGANIZATION	2.34691	5.71423e-06	0.000536448	YWHAB,YWHAH,HEBP2,PDCD5,ATP5F1C,NDUFA13,ATP5F1D,ATP5F1E,ATP5MC1,ATP5ME,RCC1L,TIMM8B,MICOS13
3.AD/0.HA	Immature	Down	GO BP	GOBP_NCRNA_PROCESSING	GOBP_NCRNA_PROCESSING	1.65107	5.99223e-06	0.000553011	RPL5,RPL11,RPS14,RPS15,RPS19,RPS27,RPL26,RPL35,RPL10A,RPL7,RPL7A,RPL27,RPL35A,RPS2,RPS7,RPS8,RPS16,RPS21,RPS24,RPS25,RPL14,SBDS,RPL7L1
3.AD/0.HA	Immature	Down	GO BP	GOBP_MITOCHONDRIAL_RESPIRATORY_CHAIN_COMPLEX_ASSEMBLY	GOBP_MITOCHONDRIAL_RESPIRATORY_CHAIN_COMPLEX_ASSEMBLY	2.58567	6.98859e-06	0.000634214	COX17,NDUFC2,NDUFA11,NDUFA3,NDUFA5,NDUFB4,NDUFB8,NDUFS6,NDUFA13,NDUFB11,NDUFAF8
3.AD/0.HA	Immature	Down	GO BP	GOBP_REGULATION_OF_INTRINSIC_APOPTOTIC_SIGNALING_PATHWAY_IN_RESPONSE_TO_DNA_DAMAGE	GOBP_REGULATION_OF_INTRINSIC_APOPTOTIC_SIGNALING_PATHWAY_IN_RESPONSE_TO_DNA_DAMAGE	3.555	7.14179e-06	0.000637492	RPL26,MIF,RPS3,CDKN2D,TAF9,CXCL12,TPT1
3.AD/0.HA	Immature	Down	GO BP	GOBP_RESPONSE_TO_INTERLEUKIN_12	GOBP_RESPONSE_TO_INTERLEUKIN_12	3.21667	7.26181e-06	0.000637751	SOD1,RPLP0,MTAP,MIF,PPIA,CFL1,ARF1,SOD2
3.AD/0.HA	Immature	Down	GO BP	GOBP_CATION_TRANSPORT	GOBP_CATION_TRANSPORT	1.12236	9.86088e-06	0.000852262	SLC9B1,COX17,FTH1,FTL,MT3,ATP6V1D,ATP6V0C,ATP6V0B,ATP6AP1,B2M,ATP6V1F,HTR2A,NEFL,HECW1,ARF1,CACNG7,CXCL12,YWHAH,CALM2,VAMP2,ATP1B1,P2RY12,TMSB4X,COMMD3,PRNP,CD63,CALCRL,FXYD6,RYR3,COX4I1,COX6A1,COX6B1,COX6C,COX7B,COX7C,COX8A,NDUFA4,ATP5F1C,ATP5F1D,ATP5F1E,ATP5MC1,ATP5ME,KCNK13,TPT1,NIPAL2,ATP13A4
3.AD/0.HA	Immature	Down	GO BP	GOBP_ATP_SYNTHESIS_COUPLED_PROTON_TRANSPORT	GOBP_ATP_SYNTHESIS_COUPLED_PROTON_TRANSPORT	3.86558	1.15376e-05	0.000966494	ATP6V0C,ATP5F1C,ATP5F1D,ATP5F1E,ATP5MC1,ATP5ME
3.AD/0.HA	Immature	Down	GO BP	GOBP_REGULATION_OF_INTRINSIC_APOPTOTIC_SIGNALING_PATHWAY_BY_P53_CLASS_MEDIATOR	GOBP_REGULATION_OF_INTRINSIC_APOPTOTIC_SIGNALING_PATHWAY_BY_P53_CLASS_MEDIATOR	3.86558	1.15376e-05	0.000966494	UBB,RPL11,RPL26,MIF,RPS7,TAF9
3.AD/0.HA	Immature	Down	GO BP	GOBP_INNER_MITOCHONDRIAL_MEMBRANE_ORGANIZATION	GOBP_INNER_MITOCHONDRIAL_MEMBRANE_ORGANIZATION	3.05406	1.50661e-05	0.00124295	ATP5F1C,NDUFA13,ATP5F1D,ATP5F1E,ATP5MC1,ATP5ME,TIMM8B,MICOS13
3.AD/0.HA	Immature	Down	GO BP	GOBP_INTRINSIC_APOPTOTIC_SIGNALING_PATHWAY	GOBP_INTRINSIC_APOPTOTIC_SIGNALING_PATHWAY	1.79872	1.57051e-05	0.00127633	SOD1,UBB,RPL11,RPS27L,RPL26,ERP29,MIF,PPIA,RPS3,RPS7,CDKN2D,RACK1,SOD2,TAF9,CXCL12,NDUFA13,TPT1,HINT1
3.AD/0.HA	Immature	Down	GO BP	GOBP_REGULATION_OF_APOPTOTIC_SIGNALING_PATHWAY	GOBP_REGULATION_OF_APOPTOTIC_SIGNALING_PATHWAY	1.6703	1.87751e-05	0.00150339	CTNNA1,SOD1,UBB,RPL11,RPL26,ERP29,GSTP1,HGF,MIF,PPIA,RPS3,TIMP3,RPS7,CDKN2D,RACK1,SOD2,TAF9,CXCL12,NDUFA13,TPT1
3.AD/0.HA	Immature	Down	GO BP	GOBP_TRANSMEMBRANE_TRANSPORT	GOBP_TRANSMEMBRANE_TRANSPORT	0.962564	2.19908e-05	0.00173536	DNAJC19,SLC9B1,UBB,COX17,ATP6V1D,ATP6V0C,ATP6V0B,ATP6AP1,ATP6V1F,RPS27A,UBC,PER2,HTR2A,NEFL,PSMB6,PSMC3,HECW1,ARF1,TOMM7,CACNG7,ACTB,S100A6,YWHAH,CALM2,TOMM20,VAMP2,ATP1B1,FABP5,P2RY12,TMSB4X,PRNP,CD63,FXYD6,CHRM3,RYR3,COX4I1,COX6A1,COX6B1,COX6C,COX7B,COX7C,COX8A,NDUFA4,ATP5F1C,ATP5F1D,ATP5F1E,ATP5MC1,ATP5ME,TIMM17A,SEC62,KCNK13,NIPAL2,ATP13A4,SLC46A3,TMEM150C,SLC35B1,SLC2A12
3.AD/0.HA	Immature	Down	GO BP	GOBP_REGULATION_OF_DEFENSE_RESPONSE_TO_VIRUS_BY_VIRUS	GOBP_REGULATION_OF_DEFENSE_RESPONSE_TO_VIRUS_BY_VIRUS	3.66298	2.26015e-05	0.00175807	B2M,ARF1,AP2M1,DOCK2,AP1S1,AP1S2
3.AD/0.HA	Immature	Down	GO BP	GOBP_INORGANIC_ION_TRANSMEMBRANE_TRANSPORT	GOBP_INORGANIC_ION_TRANSMEMBRANE_TRANSPORT	1.17888	2.91506e-05	0.00223556	SLC9B1,COX17,ATP6V1D,ATP6V0C,ATP6V0B,ATP6AP1,ATP6V1F,HTR2A,HECW1,ARF1,CACNG7,YWHAH,CALM2,VAMP2,ATP1B1,P2RY12,TMSB4X,PRNP,CD63,FXYD6,RYR3,COX4I1,COX6A1,COX6B1,COX6C,COX7B,COX7C,COX8A,NDUFA4,ATP5F1C,ATP5F1D,ATP5F1E,ATP5MC1,ATP5ME,KCNK13,NIPAL2
3.AD/0.HA	Immature	Down	GO BP	GOBP_CATION_TRANSMEMBRANE_TRANSPORT	GOBP_CATION_TRANSMEMBRANE_TRANSPORT	1.17688	3.38616e-05	0.00256078	SLC9B1,COX17,ATP6V1D,ATP6V0C,ATP6V0B,ATP6AP1,ATP6V1F,HTR2A,NEFL,HECW1,ARF1,CACNG7,YWHAH,CALM2,VAMP2,ATP1B1,P2RY12,TMSB4X,PRNP,CD63,FXYD6,RYR3,COX4I1,COX6A1,COX6B1,COX6C,COX7B,COX7C,COX8A,NDUFA4,ATP5F1C,ATP5F1D,ATP5F1E,ATP5MC1,ATP5ME,KCNK13,NIPAL2
3.AD/0.HA	Immature	Down	GO BP	GOBP_MITOCHONDRIAL_ATP_SYNTHESIS_COUPLED_PROTON_TRANSPORT	GOBP_MITOCHONDRIAL_ATP_SYNTHESIS_COUPLED_PROTON_TRANSPORT	3.83294	6.93575e-05	0.0050552	ATP5F1C,ATP5F1D,ATP5F1E,ATP5MC1,ATP5ME
3.AD/0.HA	Immature	Down	GO BP	GOBP_POSITIVE_REGULATION_OF_SIGNAL_TRANSDUCTION_BY_P53_CLASS_MEDIATOR	GOBP_POSITIVE_REGULATION_OF_SIGNAL_TRANSDUCTION_BY_P53_CLASS_MEDIATOR	3.83294	6.93575e-05	0.0050552	UBB,RPL11,RPL26,RPL23,RPS7
3.AD/0.HA	Immature	Down	GO BP	GOBP_CRISTAE_FORMATION	GOBP_CRISTAE_FORMATION	3.32825	6.96308e-05	0.0050552	ATP5F1C,ATP5F1D,ATP5F1E,ATP5MC1,ATP5ME,MICOS13
3.AD/0.HA	Immature	Down	GO BP	GOBP_MYELOID_LEUKOCYTE_MEDIATED_IMMUNITY	GOBP_MYELOID_LEUKOCYTE_MEDIATED_IMMUNITY	1.32784	7.09091e-05	0.00508027	HSP90AB1,DYNLL1,FTH1,FTL,ATP6V1D,ATP6V0C,B2M,ATP6AP2,CTSH,GSTP1,MIF,PPIA,PSMC3,TUBB4B,VAMP2,FABP5,DOCK2,IQGAP2,PDAP1,CST3,EEF1A1,COMMD3,HEBP2,NDUFC2,PGAM1,CD63
3.AD/0.HA	Immature	Down	GO BP	GOBP_POSTSYNAPTIC_CYTOSKELETON_ORGANIZATION	GOBP_POSTSYNAPTIC_CYTOSKELETON_ORGANIZATION	4.59357	7.53115e-05	0.00532448	NEFL,ARF1,ACTB,ACTG1
3.AD/0.HA	Immature	Down	GO BP	GOBP_EXOCYTOSIS	GOBP_EXOCYTOSIS	1.1072	7.62736e-05	0.00532448	UNC13B,HSP90AB1,SOD1,DYNLL1,FTH1,FTL,ATP6V1D,ATP6V0C,ATP6AP1,B2M,ATP6AP2,CTSH,GSTP1,HGF,HTR2A,MIF,PPIA,PSMC3,TIMP3,TUBB4B,TUBA4A,ARF1,VAMP2,FABP5,TMSB4X,DOCK2,IQGAP2,PDAP1,CST3,EEF1A1,COMMD3,HEBP2,NDUFC2,PGAM1,CD63,PCDH7
3.AD/0.HA	Immature	Down	GO BP	GOBP_ATP_BIOSYNTHETIC_PROCESS	GOBP_ATP_BIOSYNTHETIC_PROCESS	2.88848	9.78408e-05	0.00665929	ATP6V0C,TMSB4X,ATP5F1C,ATP5F1D,ATP5F1E,ATP5MC1,ATP5ME
3.AD/0.HA	Immature	Down	GO BP	GOBP_REGULATION_OF_TRANSFERASE_ACTIVITY	GOBP_REGULATION_OF_TRANSFERASE_ACTIVITY	1.0634	0.000101629	0.00683172	FGFR2,HSP90AB1,SOD1,UBB,RPL5,RPL11,MT3,ETAA1,RPS27A,UBC,CCND3,RPL23,ERP29,ERBB4,ALK,GNG3,GSTP1,HGF,HTR2A,PPIA,RPS3,AIDA,YWHAB,RPLP1,RPS2,RPS7,CDKN2D,JTB,CCND2,RACK1,TSC2,ACTB,CALM2,IL6R,P2RY12,EEF1A1,PRNP,PPP2R5A,DUSP12
3.AD/0.HA	Immature	Down	GO BP	GOBP_APOPTOTIC_PROCESS	GOBP_APOPTOTIC_PROCESS	0.846511	0.000113287	0.00752251	UNC13B,CTNNA1,FGFR2,HSP90AB1,PTN,SOD1,UBB,DYNLL1,RPL10,RPL11,RPS27L,MT3,RPL26,RPS27A,STAT1,UBC,ERP29,CTSH,ERBB4,ALK,GSTP1,HGF,MIF,NEFL,PPIA,RPS3,TIMP3,YWHAB,RPS3A,RPS7,CFL1,GABARAP,GAPDH,CDKN2D,JTB,PRMT2,BTG1,CCND2,RACK1,SOD2,SAP18,TSC2,TAF9,OLFM1,DOCK1,CXCL12,YWHAH,IL6R,IL6ST,PRNP,GGCT,PDCD5,NDUFA13,ITGB3BP,MTCH1,BEX3,TPT1,HIGD2A,TOX3,HINT1,IFI27L2,BEX2
3.AD/0.HA	Immature	Down	GO BP	GOBP_INTRINSIC_APOPTOTIC_SIGNALING_PATHWAY_BY_P53_CLASS_MEDIATOR	GOBP_INTRINSIC_APOPTOTIC_SIGNALING_PATHWAY_BY_P53_CLASS_MEDIATOR	2.58479	0.00012082	0.00792606	UBB,RPL11,RPS27L,RPL26,MIF,RPS7,TAF9,HINT1
3.AD/0.HA	Immature	Down	GO BP	GOBP_MITOCHONDRIAL_TRANSPORT	GOBP_MITOCHONDRIAL_TRANSPORT	1.65445	0.000131435	0.00851978	DNAJC19,YWHAB,UBL5,TOMM7,YWHAH,TOMM20,HEBP2,PDCD5,ATP5F1C,NDUFA13,ATP5F1D,ATP5F1E,ATP5MC1,ATP5ME,TIMM17A,TIMM8B
3.AD/0.HA	Immature	Down	GO BP	GOBP_NCRNA_METABOLIC_PROCESS	GOBP_NCRNA_METABOLIC_PROCESS	1.37599	0.000151924	0.00973209	RPL5,RPL11,RPS14,RPS15,RPS19,RPS27,RPL26,RPL35,RPL10A,RPL7,RPL7A,RPL27,RPL35A,RPS2,RPS7,RPS8,RPS16,RPS21,RPS24,RPS25,RPL14,SBDS,RPL7L1
3.AD/0.HA	Immature	Down	GO BP	GOBP_POSITIVE_REGULATION_OF_INTRINSIC_APOPTOTIC_SIGNALING_PATHWAY	GOBP_POSITIVE_REGULATION_OF_INTRINSIC_APOPTOTIC_SIGNALING_PATHWAY	2.76757	0.000156465	0.00990643	SOD1,UBB,RPL11,RPL26,RPS3,RPS7,RACK1
3.AD/0.HA	Immature	Down	GO BP	GOBP_IRON_ION_TRANSPORT	GOBP_IRON_ION_TRANSPORT	2.4983	0.00017619	0.0110271	FTH1,FTL,ATP6V1D,ATP6V0C,ATP6V0B,ATP6AP1,B2M,ATP6V1F
3.AD/0.HA	Immature	Down	GO BP	GOBP_POSTTRANSCRIPTIONAL_REGULATION_OF_GENE_EXPRESSION	GOBP_POSTTRANSCRIPTIONAL_REGULATION_OF_GENE_EXPRESSION	1.21841	0.00018247	0.0112903	UBB,RPL5,RPL10,RPL38,RPS27L,RPS14,RPL26,RPS27A,UBC,PER2,PSMB6,PSMC3,RPS3,YWHAB,RPL13A,RPL22,RPL30,RPS4X,GAPDH,RACK1,CIRBP,POLR2I,POLR2K,CACNG7,NIBAN1,SHFL,RCC1L
3.AD/0.HA	Immature	Down	GO BP	GOBP_SUBSTANTIA_NIGRA_DEVELOPMENT	GOBP_SUBSTANTIA_NIGRA_DEVELOPMENT	3.016	0.000199476	0.0122039	DYNLL1,ACTB,YWHAH,CALM2,CKB,COX6B1
3.AD/0.HA	Immature	Down	GO BP	GOBP_MATURATION_OF_LSU_RRNA	GOBP_MATURATION_OF_LSU_RRNA	3.39617	0.000233996	0.0141567	RPL35,RPL10A,RPL7,RPL7A,RPL7L1
3.AD/0.HA	Immature	Down	GO BP	GOBP_TRANSITION_METAL_ION_TRANSPORT	GOBP_TRANSITION_METAL_ION_TRANSPORT	2.08801	0.000252446	0.0151052	COX17,FTH1,FTL,MT3,ATP6V1D,ATP6V0C,ATP6V0B,ATP6AP1,B2M,ATP6V1F
3.AD/0.HA	Immature	Down	GO BP	GOBP_NEGATIVE_REGULATION_OF_UBIQUITIN_PROTEIN_TRANSFERASE_ACTIVITY	GOBP_NEGATIVE_REGULATION_OF_UBIQUITIN_PROTEIN_TRANSFERASE_ACTIVITY	4.00922	0.000259491	0.0153579	RPL5,RPL11,RPL23,RPS7
3.AD/0.HA	Immature	Down	GO BP	GOBP_NEGATIVE_REGULATION_OF_PROTEOLYSIS_INVOLVED_IN_CELLULAR_PROTEIN_CATABOLIC_PROCESS	GOBP_NEGATIVE_REGULATION_OF_PROTEOLYSIS_INVOLVED_IN_CELLULAR_PROTEIN_CATABOLIC_PROCESS	2.62967	0.000266682	0.0156138	HSP90AB1,RPL5,RPL11,RPL23,RPS7,GABARAPL2,TAF9
3.AD/0.HA	Immature	Down	GO BP	GOBP_NEGATIVE_REGULATION_OF_INTRINSIC_APOPTOTIC_SIGNALING_PATHWAY_IN_RESPONSE_TO_DNA_DAMAGE	GOBP_NEGATIVE_REGULATION_OF_INTRINSIC_APOPTOTIC_SIGNALING_PATHWAY_IN_RESPONSE_TO_DNA_DAMAGE	3.33431	0.000278036	0.0161054	MIF,CDKN2D,TAF9,CXCL12,TPT1
3.AD/0.HA	Immature	Down	GO BP	GOBP_TRANSLATIONAL_ELONGATION	GOBP_TRANSLATIONAL_ELONGATION	2.00216	0.000391626	0.0223614	MRPS7,RPL30,RPLP1,RACK1,EEF1A1,SHFL,CHCHD1,MRPS16,MRPL51,MRPL57
3.AD/0.HA	Immature	Down	GO BP	GOBP_NEGATIVE_REGULATION_OF_PROTEOLYSIS	GOBP_NEGATIVE_REGULATION_OF_PROTEOLYSIS	1.4508	0.000394251	0.0223614	HSP90AB1,RPL5,RPL11,MT3,RPL23,HGF,PEBP1,TIMP3,RPS7,GAPDH,CDKN2D,GABARAPL2,TAF9,CST3,PRNP,PCSK1N,BEX3
3.AD/0.HA	Immature	Down	GO BP	GOBP_MITOCHONDRIAL_TRANSMEMBRANE_TRANSPORT	GOBP_MITOCHONDRIAL_TRANSMEMBRANE_TRANSPORT	2.13457	0.000404828	0.0227246	DNAJC19,TOMM7,TOMM20,ATP5F1C,ATP5F1D,ATP5F1E,ATP5MC1,ATP5ME,TIMM17A
3.AD/0.HA	Immature	Down	GO BP	GOBP_NEGATIVE_REGULATION_OF_UBIQUITIN_DEPENDENT_PROTEIN_CATABOLIC_PROCESS	GOBP_NEGATIVE_REGULATION_OF_UBIQUITIN_DEPENDENT_PROTEIN_CATABOLIC_PROCESS	2.79302	0.000420924	0.0232306	HSP90AB1,RPL5,RPL11,RPL23,RPS7,TAF9
3.AD/0.HA	Immature	Down	GO BP	GOBP_PROTEIN_NEDDYLATION	GOBP_PROTEIN_NEDDYLATION	3.78709	0.000422375	0.0232306	RPL5,RPL11,RNF7,COPS9
3.AD/0.HA	Immature	Down	GO BP	GOBP_NEGATIVE_REGULATION_OF_PROTEIN_MODIFICATION_BY_SMALL_PROTEIN_CONJUGATION_OR_REMOVAL	GOBP_NEGATIVE_REGULATION_OF_PROTEIN_MODIFICATION_BY_SMALL_PROTEIN_CONJUGATION_OR_REMOVAL	2.28385	0.000443057	0.0241244	RPL5,RPL11,PER2,RPL23,PPIA,RPS3,RPS7,COPS9
3.AD/0.HA	Immature	Down	GO BP	GOBP_NEGATIVE_REGULATION_OF_INTRINSIC_APOPTOTIC_SIGNALING_PATHWAY	GOBP_NEGATIVE_REGULATION_OF_INTRINSIC_APOPTOTIC_SIGNALING_PATHWAY	2.2483	0.000515769	0.0272387	MIF,PPIA,CDKN2D,SOD2,TAF9,CXCL12,NDUFA13,TPT1
3.AD/0.HA	Immature	Down	GO BP	GOBP_RIBONUCLEOSIDE_TRIPHOSPHATE_BIOSYNTHETIC_PROCESS	GOBP_RIBONUCLEOSIDE_TRIPHOSPHATE_BIOSYNTHETIC_PROCESS	2.45634	0.000517752	0.0272387	ATP6V0C,TMSB4X,ATP5F1C,ATP5F1D,ATP5F1E,ATP5MC1,ATP5ME
3.AD/0.HA	Immature	Down	GO BP	GOBP_REGULATION_OF_CELLULAR_AMIDE_METABOLIC_PROCESS	GOBP_REGULATION_OF_CELLULAR_AMIDE_METABOLIC_PROCESS	1.33851	0.000520261	0.0272387	RPL5,RPL10,RPL38,RPS27L,RPS14,RPL26,PER2,RPS3,RPL13A,RPL22,RPL30,RPS4X,GAPDH,RACK1,CIRBP,PGAM1,PRNP,NIBAN1,SHFL,RCC1L
3.AD/0.HA	Immature	Down	GO BP	GOBP_NEGATIVE_REGULATION_OF_CELLULAR_CATABOLIC_PROCESS	GOBP_NEGATIVE_REGULATION_OF_CELLULAR_CATABOLIC_PROCESS	1.55561	0.000621877	0.0320717	HSP90AB1,RPL5,RPL11,MT3,RPL23,HGF,TIMP3,RPS7,CIRBP,GABARAPL2,TSC2,TAF9,FEZ1,CST3
3.AD/0.HA	Immature	Down	GO BP	GOBP_POSITIVE_REGULATION_OF_PROTEIN_SERINE_THREONINE_KINASE_ACTIVITY	GOBP_POSITIVE_REGULATION_OF_PROTEIN_SERINE_THREONINE_KINASE_ACTIVITY	1.43753	0.000624352	0.0320717	HSP90AB1,SOD1,UBB,ETAA1,RPS27A,UBC,CCND3,ERP29,ALK,GNG3,HGF,HTR2A,PPIA,RPS3,CCND2,CALM2
3.AD/0.HA	Immature	Down	GO BP	GOBP_PROTEIN_IMPORT_INTO_MITOCHONDRIAL_MATRIX	GOBP_PROTEIN_IMPORT_INTO_MITOCHONDRIAL_MATRIX	3.59372	0.000647464	0.0329481	DNAJC19,TOMM7,TOMM20,TIMM17A
3.AD/0.HA	Immature	Down	GO BP	GOBP_NEGATIVE_REGULATION_OF_PROTEIN_CATABOLIC_PROCESS	GOBP_NEGATIVE_REGULATION_OF_PROTEIN_CATABOLIC_PROCESS	2.00948	0.000723173	0.03646	HSP90AB1,RPL5,RPL11,RPL23,TIMP3,RPS7,GABARAPL2,TAF9,CST3
3.AD/0.HA	Immature	Down	GO BP	GOBP_POSITIVE_REGULATION_OF_APOPTOTIC_SIGNALING_PATHWAY	GOBP_POSITIVE_REGULATION_OF_APOPTOTIC_SIGNALING_PATHWAY	1.99622	0.000768539	0.0383917	CTNNA1,SOD1,UBB,RPL11,RPL26,RPS3,TIMP3,RPS7,RACK1
3.AD/0.HA	Immature	Down	GO BP	GOBP_TRANSFERRIN_TRANSPORT	GOBP_TRANSFERRIN_TRANSPORT	2.96489	0.000784926	0.0388286	ATP6V1D,ATP6V0C,ATP6V0B,ATP6AP1,ATP6V1F
3.AD/0.HA	Immature	Down	GO BP	GOBP_NEGATIVE_REGULATION_OF_CELLULAR_PROTEIN_CATABOLIC_PROCESS	GOBP_NEGATIVE_REGULATION_OF_CELLULAR_PROTEIN_CATABOLIC_PROCESS	2.34392	0.000791547	0.0388286	HSP90AB1,RPL5,RPL11,RPL23,RPS7,GABARAPL2,TAF9
3.AD/0.HA	Immature	Down	GO BP	GOBP_PROTEIN_LOCALIZATION_TO_MITOCHONDRION	GOBP_PROTEIN_LOCALIZATION_TO_MITOCHONDRION	1.85479	0.00081919	0.0398258	DNAJC19,YWHAB,UBL5,TOMM7,YWHAH,TOMM20,PDCD5,NDUFA13,TIMM17A,TIMM8B
3.AD/0.HA	Immature	Down	GO BP	GOBP_REGULATION_OF_PROTEIN_STABILITY	GOBP_REGULATION_OF_PROTEIN_STABILITY	1.44449	0.000859136	0.0413982	HSP90AB1,RPL5,RPL11,MT3,RPL23,CTSH,RPS7,GAPDH,PPIB,TOMM7,TAF9,ADGRV1,ATP1B1,PRNP,SERF2
3.AD/0.HA	Immature	Down	GO BP	GOBP_MATURATION_OF_SSU_RRNA_FROM_TRICISTRONIC_RRNA_TRANSCRIPT_SSU_RRNA_5_8S_RRNA_LSU_RRNA	GOBP_MATURATION_OF_SSU_RRNA_FROM_TRICISTRONIC_RRNA_TRANSCRIPT_SSU_RRNA_5_8S_RRNA_LSU_RRNA	2.9191	0.000892516	0.0426294	RPS14,RPS19,RPS8,RPS16,RPS21
3.AD/0.HA	Immature	Down	GO BP	GOBP_POSTSYNAPTIC_ACTIN_CYTOSKELETON_ORGANIZATION	GOBP_POSTSYNAPTIC_ACTIN_CYTOSKELETON_ORGANIZATION	4.36744	0.000919836	0.0431768	ARF1,ACTB,ACTG1
3.AD/0.HA	Immature	Down	GO BP	GOBP_REGULATION_OF_PROTEIN_NEDDYLATION	GOBP_REGULATION_OF_PROTEIN_NEDDYLATION	4.36744	0.000919836	0.0431768	RPL5,RPL11,COPS9
3.AD/0.HA	Immature	Down	GO BP	GOBP_INTRINSIC_APOPTOTIC_SIGNALING_PATHWAY_IN_RESPONSE_TO_DNA_DAMAGE	GOBP_INTRINSIC_APOPTOTIC_SIGNALING_PATHWAY_IN_RESPONSE_TO_DNA_DAMAGE	2.09715	0.000971956	0.0452333	RPS27L,RPL26,MIF,RPS3,CDKN2D,TAF9,CXCL12,TPT1
3.AD/0.HA	Immature	Down	GO BP	GOBP_MYELOID_LEUKOCYTE_ACTIVATION	GOBP_MYELOID_LEUKOCYTE_ACTIVATION	1.05964	0.000997969	0.0460504	HSP90AB1,DYNLL1,FTH1,FTL,ATP6V1D,ATP6V0C,B2M,ATP6AP2,CTSH,GSTP1,MIF,PPIA,PSMC3,TUBB4B,VAMP2,FABP5,DOCK2,IQGAP2,PDAP1,CST3,EEF1A1,COMMD3,HEBP2,NDUFC2,PGAM1,CD63
3.AD/0.HA	Immature	Down	GO BP	GOBP_REGULATION_OF_CELL_DEATH	GOBP_REGULATION_OF_CELL_DEATH	0.765332	0.00102292	0.0468052	UNC13B,CTNNA1,FGFR2,GPX4,HSP90AB1,PTN,SOD1,UBB,RPL10,RPL11,MT3,RPL26,RPS27A,STAT1,UBC,ERP29,CTSH,ALK,GSTP1,HGF,MIF,NEFL,PPIA,RPS3,TIMP3,RPS3A,RPS7,CFL1,CDKN2D,PRMT2,BTG1,CCND2,RACK1,SOD2,SAP18,TAF9,OLFM1,CXCL12,IL6ST,HEBP2,PRNP,PDCD5,INPP5A,NDUFA13,ITGB3BP,MTCH1,BEX3,TPT1,HIGD2A,TOX3,BEX2
3.AD/0.HA	Immature	Down	GO BP	GOBP_PROTEIN_TARGETING_TO_MITOCHONDRION	GOBP_PROTEIN_TARGETING_TO_MITOCHONDRION	2.08126	0.00103803	0.0471006	DNAJC19,UBL5,TOMM7,TOMM20,PDCD5,NDUFA13,TIMM17A,TIMM8B
3.AD/0.HA	Immature	Down	GO BP	GOBP_ORGANELLE_ASSEMBLY	GOBP_ORGANELLE_ASSEMBLY	0.965754	0.00106452	0.0479035	IFT27,DYNLL1,RPL3,RPL5,RPL6,RPL10,RPL11,RPL23A,RPL24,RPL38,RPLP0,RPSA,RPS27L,MRPS7,RPS10,RPS14,RPS15,RPS19,RPS27,ATP6V1D,RPS3,RPS23,TUBB4B,GABARAP,SBDS,TUBA4A,SSNA1,CIRBP,GABARAPL2,FEZ1,CFL2,LRRTM1
3.AD/0.HA	Immature	Down	GO BP	GOBP_REGULATION_OF_UBIQUITIN_PROTEIN_LIGASE_ACTIVITY	GOBP_REGULATION_OF_UBIQUITIN_PROTEIN_LIGASE_ACTIVITY	3.34548	0.00112736	0.0503156	RPL5,RPL11,RPL23,RPS7
3.AD/0.HA	Immature	Down	GO BP	GOBP_POSITIVE_REGULATION_OF_OSTEOBLAST_DIFFERENTIATION	GOBP_POSITIVE_REGULATION_OF_OSTEOBLAST_DIFFERENTIATION	2.48416	0.00116977	0.0513662	ATP6AP1,ACVR2B,HGF,RUNX2,IL6R,IL6ST
3.AD/0.HA	Immature	Down	GO BP	GOBP_PH_REDUCTION	GOBP_PH_REDUCTION	2.48416	0.00116977	0.0513662	ATP6V1D,ATP6V0C,ATP6V0B,ATP6AP1,ATP6V1F,ATP6AP2
3.AD/0.HA	Immature	Down	GO BP	GOBP_NUCLEOSIDE_TRIPHOSPHATE_BIOSYNTHETIC_PROCESS	GOBP_NUCLEOSIDE_TRIPHOSPHATE_BIOSYNTHETIC_PROCESS	2.21976	0.0012588	0.0543983	ATP6V0C,TMSB4X,ATP5F1C,ATP5F1D,ATP5F1E,ATP5MC1,ATP5ME
3.AD/0.HA	Immature	Down	GO BP	GOBP_NEURAL_NUCLEUS_DEVELOPMENT	GOBP_NEURAL_NUCLEUS_DEVELOPMENT	2.45667	0.00128013	0.0548842	DYNLL1,ACTB,YWHAH,CALM2,CKB,COX6B1
3.AD/0.HA	Immature	Down	GO BP	GOBP_RIBONUCLEOSIDE_TRIPHOSPHATE_METABOLIC_PROCESS	GOBP_RIBONUCLEOSIDE_TRIPHOSPHATE_METABOLIC_PROCESS	2.16126	0.0015617	0.0664331	ATP6V0C,TMSB4X,ATP5F1C,ATP5F1D,ATP5F1E,ATP5MC1,ATP5ME
3.AD/0.HA	Immature	Down	GO BP	GOBP_NEGATIVE_REGULATION_OF_CATABOLIC_PROCESS	GOBP_NEGATIVE_REGULATION_OF_CATABOLIC_PROCESS	1.34502	0.00163036	0.0688162	HSP90AB1,RPL5,RPL11,MT3,RPL23,ALK,HGF,TIMP3,RPS7,CIRBP,GABARAPL2,TSC2,TAF9,FEZ1,CST3
3.AD/0.HA	Immature	Down	GO BP	GOBP_REGULATION_OF_PROTEOLYSIS	GOBP_REGULATION_OF_PROTEOLYSIS	0.986736	0.00164699	0.0689834	HSP90AB1,UBB,RPL5,RPL11,RPS27L,MT3,RPL23,CTSH,HGF,PEBP1,PSMC3,RPS3,TIMP3,RPS7,GAPDH,CDKN2D,RACK1,GABARAPL2,TAF9,CST3,PRNP,PDCD5,PCSK1N,NDUFA13,TIMM17A,MTCH1,BEX3
3.AD/0.HA	Immature	Down	GO BP	GOBP_MIDBRAIN_DEVELOPMENT	GOBP_MIDBRAIN_DEVELOPMENT	2.1237	0.00179322	0.0745351	FGFR2,DYNLL1,ACTB,YWHAH,CALM2,CKB,COX6B1
3.AD/0.HA	Immature	Down	GO BP	GOBP_POSITIVE_REGULATION_OF_TRANSFERASE_ACTIVITY	GOBP_POSITIVE_REGULATION_OF_TRANSFERASE_ACTIVITY	1.00038	0.00191947	0.079178	FGFR2,HSP90AB1,SOD1,UBB,MT3,ETAA1,RPS27A,UBC,CCND3,ERP29,ERBB4,ALK,GNG3,HGF,HTR2A,PPIA,RPS3,RPLP1,RPS2,JTB,CCND2,CALM2,IL6R,P2RY12,PRNP,DUSP12
3.AD/0.HA	Immature	Down	GO BP	GOBP_POSITIVE_REGULATION_OF_CATALYTIC_ACTIVITY	GOBP_POSITIVE_REGULATION_OF_CATALYTIC_ACTIVITY	0.76849	0.00194542	0.0796452	DNAJC19,FGFR2,HSP90AB1,SOD1,UBB,DYNLL1,RPS27L,COX17,MT3,ETAA1,RPS27A,UBC,CCND3,ERP29,CTSH,ERBB4,ALK,GNG3,HGF,HTR2A,PPIA,RPS3,YWHAB,RPLP1,RPS2,JTB,CCND2,RACK1,GABARAPL2,TSC2,DOCK1,CALM2,IL6R,ATP1B1,P2RY12,TMSB4X,DOCK2,IQGAP2,PRNP,PDCD5,ARHGAP42,DUSP12,NDUFA13,MTCH1,BEX3
3.AD/0.HA	Immature	Down	GO BP	GOBP_TRANSITION_METAL_ION_HOMEOSTASIS	GOBP_TRANSITION_METAL_ION_HOMEOSTASIS	1.7874	0.00196615	0.0798932	SOD1,FTH1,FTL,MT3,ATP6AP1,B2M,NUBP1,ARF1,PRNP
3.AD/0.HA	Immature	Down	GO BP	GOBP_CELLULAR_PROTEIN_COMPLEX_DISASSEMBLY	GOBP_CELLULAR_PROTEIN_COMPLEX_DISASSEMBLY	1.49663	0.00199655	0.0805276	MRPS7,CFL1,STMN2,STMN1,STMN3,SVIL,SHFL,CHCHD1,MRPS16,MRPL51,MRPL57,CFL2
3.AD/0.HA	Immature	Down	GO BP	GOBP_POSITIVE_REGULATION_OF_CELL_DEATH	GOBP_POSITIVE_REGULATION_OF_CELL_DEATH	1.02444	0.00202794	0.0811921	UNC13B,CTNNA1,PTN,SOD1,UBB,RPL11,MT3,RPL26,RPS27A,UBC,RPS3,TIMP3,RPS7,PRMT2,BTG1,RACK1,SOD2,SAP18,OLFM1,HEBP2,PRNP,PDCD5,ITGB3BP,MTCH1
3.AD/0.HA	Immature	Down	GO BP	GOBP_REGULATION_OF_PROTEIN_LOCALIZATION_TO_MEMBRANE	GOBP_REGULATION_OF_PROTEIN_LOCALIZATION_TO_MEMBRANE	1.5697	0.00207144	0.0823286	PTN,YWHAB,RACK1,ACTB,YWHAH,GPC6,AP2M1,PRNP,PDCD5,PPP2R5A,GPC5
3.AD/0.HA	Immature	Down	GO BP	GOBP_NEGATIVE_REGULATION_OF_SMOOTH_MUSCLE_CONTRACTION	GOBP_NEGATIVE_REGULATION_OF_SMOOTH_MUSCLE_CONTRACTION	3.85349	0.00209436	0.0826362	SOD1,CALCRL,ARHGAP42
3.AD/0.HA	Immature	Down	GO BP	GOBP_CELLULAR_MONOVALENT_INORGANIC_CATION_HOMEOSTASIS	GOBP_CELLULAR_MONOVALENT_INORGANIC_CATION_HOMEOSTASIS	1.87587	0.0024002	0.0935385	SLC9B1,ATP6V1D,ATP6V0C,ATP6V0B,ATP6AP1,ATP6V1F,ATP6AP2,ATP1B1
3.AD/0.HA	Immature	Down	GO BP	GOBP_PHAGOSOME_ACIDIFICATION	GOBP_PHAGOSOME_ACIDIFICATION	3.00842	0.00240503	0.0935385	ATP6V1D,ATP6V0C,ATP6V0B,ATP6V1F
3.AD/0.HA	Immature	Down	GO BP	GOBP_NEGATIVE_REGULATION_OF_PROTEIN_METABOLIC_PROCESS	GOBP_NEGATIVE_REGULATION_OF_PROTEIN_METABOLIC_PROCESS	0.859279	0.00250148	0.0964809	HSP90AB1,PTN,TERF2IP,RPL5,RPL11,MT3,PER2,RPL23,GSTP1,HGF,PEBP1,PPIA,RPS3,AIDA,TIMP3,YWHAB,RPL13A,RPS7,GAPDH,CDKN2D,RACK1,CIRBP,GABARAPL2,TSC2,TAF9,CALM2,CST3,PRNP,NIBAN1,PCSK1N,SHFL,PFDN5,BEX3,BEX4,COPS9
3.AD/0.HA	Immature	Down	GO BP	GOBP_CELLULAR_TRANSITION_METAL_ION_HOMEOSTASIS	GOBP_CELLULAR_TRANSITION_METAL_ION_HOMEOSTASIS	1.86195	0.00253479	0.0964809	SOD1,FTH1,FTL,MT3,ATP6AP1,NUBP1,ARF1,PRNP
3.AD/0.HA	Immature	Down	GO BP	GOBP_REGULATION_OF_PROTEIN_SERINE_THREONINE_KINASE_ACTIVITY	GOBP_REGULATION_OF_PROTEIN_SERINE_THREONINE_KINASE_ACTIVITY	1.1112	0.00256226	0.0964809	HSP90AB1,SOD1,UBB,ETAA1,RPS27A,UBC,CCND3,ERP29,ALK,GNG3,GSTP1,HGF,HTR2A,PPIA,RPS3,AIDA,CDKN2D,CCND2,ACTB,CALM2
3.AD/0.HA	Immature	Down	GO BP	GOBP_NEGATIVE_REGULATION_OF_INTRACELLULAR_SIGNAL_TRANSDUCTION	GOBP_NEGATIVE_REGULATION_OF_INTRACELLULAR_SIGNAL_TRANSDUCTION	1.1112	0.00256226	0.0964809	STAT1,GSTP1,MIF,PEBP1,PPIA,AIDA,TIMP3,STMN1,STMN3,CDKN2D,RACK1,SOD2,TSC2,TAF9,CXCL12,TMSB4X,PRNP,ARHGAP42,NDUFA13,TPT1
3.AD/0.HA	Immature	Down	GO BP	GOBP_CELL_ACTIVATION_INVOLVED_IN_IMMUNE_RESPONSE	GOBP_CELL_ACTIVATION_INVOLVED_IN_IMMUNE_RESPONSE	0.964688	0.00256928	0.0964809	HSP90AB1,DYNLL1,FTH1,FTL,ATP6V1D,ATP6V0C,B2M,ATP6AP2,CTSH,GSTP1,MIF,PPIA,PSMC3,TUBB4B,IL6R,VAMP2,FABP5,DOCK2,IQGAP2,PDAP1,CST3,EEF1A1,COMMD3,HEBP2,NDUFC2,PGAM1,CD63
3.AD/0.HA	Immature	Down	GO BP	GOBP_MEMBRANE_ORGANIZATION	GOBP_MEMBRANE_ORGANIZATION	0.871422	0.00265055	0.098851	PTN,SOD1,UBB,MT3,RPS27A,UBC,PPIA,YWHAB,ARF1,DOCK1,ACTB,YWHAH,VAMP2,ATP1B1,AP2M1,ACTG1,DOCK2,HEBP2,PDCD5,ARV1,ATP5F1C,NDUFA13,ATP5F1D,ATP5F1E,ATP5MC1,ATP5ME,MTCH1,RCC1L,TIMM8B,TMED9,TRAPPC5,TRAPPC4,MICOS13
3.AD/0.HA	Immature	Down	GO BP	GOBP_RNA_PROCESSING	GOBP_RNA_PROCESSING	0.844594	0.00296693	0.109897	RPL5,RPL11,RPS14,RPS15,RPS19,RPS27,SYF2,RPL26,RPL35,RPL10A,RPL7,RPL7A,RPL27,RPL35A,RPS2,RPS7,RPS8,RPS13,RPS16,RPS21,RPS24,RPS25,RPS26,RPL14,SBDS,SAP18,WBP4,CIRBP,POLR2I,POLR2K,UBL5,RPL7L1,ADARB2
3.AD/0.HA	Immature	Down	GO BP	GOBP_MATURATION_OF_LSU_RRNA_FROM_TRICISTRONIC_RRNA_TRANSCRIPT_SSU_RRNA_5_8S_RRNA_LSU_RRNA	GOBP_MATURATION_OF_LSU_RRNA_FROM_TRICISTRONIC_RRNA_TRANSCRIPT_SSU_RRNA_5_8S_RRNA_LSU_RRNA	3.58977	0.00323223	0.118117	RPL35,RPL7,RPL7L1
3.AD/0.HA	Immature	Down	GO BP	GOBP_POSITIVE_REGULATION_OF_DENDRITE_DEVELOPMENT	GOBP_POSITIVE_REGULATION_OF_DENDRITE_DEVELOPMENT	3.58977	0.00323223	0.118117	PTN,ALK,ZDHHC15
3.AD/0.HA	Immature	Down	GO BP	GOBP_MATURATION_OF_SSU_RRNA	GOBP_MATURATION_OF_SSU_RRNA	2.4258	0.00349315	0.125133	RPS14,RPS19,RPS8,RPS16,RPS21
3.AD/0.HA	Immature	Down	GO BP	GOBP_REGULATION_OF_CELLULAR_CATABOLIC_PROCESS	GOBP_REGULATION_OF_CELLULAR_CATABOLIC_PROCESS	0.891323	0.00353121	0.125669	HSP90AB1,UBB,RPL5,RPL11,MT3,ATP6V1D,ATP6V0C,ATP6V0B,RPS27A,UBC,RPL23,HGF,HTR2A,PSMB6,PSMC3,TIMP3,YWHAB,RPS7,GAPDH,RACK1,CIRBP,GABARAPL2,TSC2,TAF9,CACNG7,FEZ1,CST3,EEF1A1,PGAM1,TMEM150C
3.AD/0.HA	Immature	Down	GO BP	GOBP_REGULATION_OF_PROTEIN_KINASE_ACTIVITY	GOBP_REGULATION_OF_PROTEIN_KINASE_ACTIVITY	0.901694	0.00376282	0.133043	HSP90AB1,SOD1,UBB,MT3,ETAA1,RPS27A,UBC,CCND3,ERP29,ALK,GNG3,GSTP1,HGF,HTR2A,PPIA,RPS3,AIDA,YWHAB,RPLP1,CDKN2D,JTB,CCND2,RACK1,TSC2,ACTB,CALM2,IL6R,PRNP
3.AD/0.HA	Immature	Down	GO BP	GOBP_POSITIVE_REGULATION_OF_PROTEIN_KINASE_ACTIVITY	GOBP_POSITIVE_REGULATION_OF_PROTEIN_KINASE_ACTIVITY	1.05242	0.00388426	0.135891	HSP90AB1,SOD1,UBB,MT3,ETAA1,RPS27A,UBC,CCND3,ERP29,ALK,GNG3,HGF,HTR2A,PPIA,RPS3,RPLP1,JTB,CCND2,CALM2,IL6R,PRNP
3.AD/0.HA	Immature	Down	GO BP	GOBP_ACTIN_FILAMENT_SEVERING	GOBP_ACTIN_FILAMENT_SEVERING	3.47461	0.00391825	0.135891	CFL1,SVIL,CFL2
3.AD/0.HA	Immature	Down	GO BP	GOBP_REGULATION_OF_INTRINSIC_APOPTOTIC_SIGNALING_PATHWAY_IN_RESPONSE_TO_DNA_DAMAGE_BY_P53_CLASS_MEDIATOR	GOBP_REGULATION_OF_INTRINSIC_APOPTOTIC_SIGNALING_PATHWAY_IN_RESPONSE_TO_DNA_DAMAGE_BY_P53_CLASS_MEDIATOR	3.47461	0.00391825	0.135891	RPL26,MIF,TAF9
3.AD/0.HA	Immature	Down	GO BP	GOBP_NEGATIVE_REGULATION_OF_PROTEIN_MODIFICATION_PROCESS	GOBP_NEGATIVE_REGULATION_OF_PROTEIN_MODIFICATION_PROCESS	1.03759	0.00407906	0.140573	PTN,TERF2IP,RPL5,RPL11,PER2,RPL23,GSTP1,HGF,PPIA,RPS3,AIDA,YWHAB,RPS7,CDKN2D,RACK1,TSC2,CALM2,PRNP,NIBAN1,BEX4,COPS9
3.AD/0.HA	Immature	Down	GO BP	GOBP_PROTEIN_CONTAINING_COMPLEX_DISASSEMBLY	GOBP_PROTEIN_CONTAINING_COMPLEX_DISASSEMBLY	1.24698	0.0041146	0.140906	MRPS7,RPL23,CFL1,STMN2,GABARAP,STMN1,STMN3,GABARAPL2,SVIL,SHFL,CHCHD1,MRPS16,MRPL51,MRPL57,CFL2
3.AD/0.HA	Immature	Down	GO BP	GOBP_REGULATION_OF_UBIQUITIN_PROTEIN_TRANSFERASE_ACTIVITY	GOBP_REGULATION_OF_UBIQUITIN_PROTEIN_TRANSFERASE_ACTIVITY	2.33264	0.00450139	0.15123	RPL5,RPL11,RPL23,RPS2,RPS7
3.AD/0.HA	Immature	Down	GO BP	GOBP_ESTABLISHMENT_OF_PROTEIN_LOCALIZATION_TO_MITOCHONDRIAL_MEMBRANE	GOBP_ESTABLISHMENT_OF_PROTEIN_LOCALIZATION_TO_MITOCHONDRIAL_MEMBRANE	2.33264	0.00450139	0.15123	YWHAB,YWHAH,PDCD5,NDUFA13,TIMM8B
3.AD/0.HA	Immature	Down	GO BP	GOBP_ACTIVATION_OF_MAPK_ACTIVITY	GOBP_ACTIVATION_OF_MAPK_ACTIVITY	1.59457	0.00451954	0.15123	SOD1,UBB,RPS27A,UBC,ERP29,ALK,GNG3,HGF,PPIA
3.AD/0.HA	Immature	Down	GO BP	GOBP_REGULATION_OF_TRANSPORTER_ACTIVITY	GOBP_REGULATION_OF_TRANSPORTER_ACTIVITY	1.27865	0.00455203	0.15123	COX17,NEFL,HECW1,CACNG7,ACTB,YWHAH,CALM2,VAMP2,ATP1B1,TMSB4X,PRNP,FXYD6,CHRM3
3.AD/0.HA	Immature	Down	GO BP	GOBP_PROTEIN_STABILIZATION	GOBP_PROTEIN_STABILIZATION	1.49374	0.00455495	0.15123	HSP90AB1,RPL5,RPL11,MT3,RPL23,RPS7,GAPDH,PPIB,TAF9,ATP1B1
3.AD/0.HA	Immature	Down	GO BP	GOBP_CELLULAR_RESPONSE_TO_ATP	GOBP_CELLULAR_RESPONSE_TO_ATP	3.36699	0.00468632	0.154649	SOD1,P2RY12,RYR3
3.AD/0.HA	Immature	Down	GO BP	GOBP_NEGATIVE_REGULATION_OF_APOPTOTIC_SIGNALING_PATHWAY	GOBP_NEGATIVE_REGULATION_OF_APOPTOTIC_SIGNALING_PATHWAY	1.39503	0.00491252	0.160172	CTNNA1,GSTP1,HGF,MIF,PPIA,CDKN2D,SOD2,TAF9,CXCL12,NDUFA13,TPT1
3.AD/0.HA	Immature	Down	GO BP	GOBP_REGULATION_OF_TRANSCRIPTION_FROM_RNA_POLYMERASE_II_PROMOTER_IN_RESPONSE_TO_HYPOXIA	GOBP_REGULATION_OF_TRANSCRIPTION_FROM_RNA_POLYMERASE_II_PROMOTER_IN_RESPONSE_TO_HYPOXIA	2.03326	0.00495787	0.160688	UBB,BACH1,RPS27A,UBC,PSMB6,PSMC3
3.AD/0.HA	Immature	Down	GO BP	GOBP_REGULATION_OF_PH	GOBP_REGULATION_OF_PH	1.8377	0.0049995	0.161079	SLC9B1,ATP6V1D,ATP6V0C,ATP6V0B,ATP6AP1,ATP6V1F,ATP6AP2
3.AD/0.HA	Immature	Down	GO BP	GOBP_POSITIVE_REGULATION_OF_TRANSLATION	GOBP_POSITIVE_REGULATION_OF_TRANSLATION	1.6715	0.00535306	0.171455	RPL5,RPS27L,RPL26,RPL30,RPS4X,CIRBP,NIBAN1,RCC1L
3.AD/0.HA	Immature	Down	GO BP	GOBP_POSITIVE_REGULATION_OF_CELLULAR_AMIDE_METABOLIC_PROCESS	GOBP_POSITIVE_REGULATION_OF_CELLULAR_AMIDE_METABOLIC_PROCESS	1.54522	0.00555865	0.17597	RPL5,RPS27L,RPL26,RPL30,RPS4X,RACK1,CIRBP,NIBAN1,RCC1L
3.AD/0.HA	Immature	Down	GO BP	GOBP_POSTSYNAPSE_ORGANIZATION	GOBP_POSTSYNAPSE_ORGANIZATION	1.54522	0.00555865	0.17597	PTN,NEFL,CFL1,ARF1,ZDHHC15,ACTB,ACTG1,PRNP,LRRTM1
3.AD/0.HA	Immature	Down	GO BP	GOBP_NUCLEOSIDE_TRIPHOSPHATE_METABOLIC_PROCESS	GOBP_NUCLEOSIDE_TRIPHOSPHATE_METABOLIC_PROCESS	1.79266	0.00585128	0.184163	ATP6V0C,TMSB4X,ATP5F1C,ATP5F1D,ATP5F1E,ATP5MC1,ATP5ME
3.AD/0.HA	Immature	Down	GO BP	GOBP_NEGATIVE_REGULATION_OF_RESPONSE_TO_DNA_DAMAGE_STIMULUS	GOBP_NEGATIVE_REGULATION_OF_RESPONSE_TO_DNA_DAMAGE_STIMULUS	1.97332	0.00597216	0.186888	MIF,RPS3,CDKN2D,TAF9,CXCL12,TPT1
3.AD/0.HA	Immature	Down	GO BP	GOBP_PROTEIN_TRANSMEMBRANE_IMPORT_INTO_INTRACELLULAR_ORGANELLE	GOBP_PROTEIN_TRANSMEMBRANE_IMPORT_INTO_INTRACELLULAR_ORGANELLE	2.59272	0.00608615	0.189366	DNAJC19,TOMM7,TOMM20,TIMM17A
3.AD/0.HA	Immature	Down	GO BP	GOBP_REGULATION_OF_OXIDATIVE_STRESS_INDUCED_CELL_DEATH	GOBP_REGULATION_OF_OXIDATIVE_STRESS_INDUCED_CELL_DEATH	2.18931	0.00661636	0.202977	SOD1,HGF,PPIA,RACK1,SOD2
3.AD/0.HA	Immature	Down	GO BP	GOBP_POSITIVE_REGULATION_OF_ESTABLISHMENT_OF_PROTEIN_LOCALIZATION_TO_MITOCHONDRION	GOBP_POSITIVE_REGULATION_OF_ESTABLISHMENT_OF_PROTEIN_LOCALIZATION_TO_MITOCHONDRION	2.18931	0.00661636	0.202977	YWHAB,UBL5,TOMM7,YWHAH,PDCD5
3.AD/0.HA	Immature	Down	GO BP	GOBP_REGULATION_OF_CYSTEINE_TYPE_ENDOPEPTIDASE_ACTIVITY	GOBP_REGULATION_OF_CYSTEINE_TYPE_ENDOPEPTIDASE_ACTIVITY	1.33199	0.00663544	0.202977	RPS27L,MT3,CTSH,HGF,RPS3,CDKN2D,RACK1,PDCD5,NDUFA13,MTCH1,BEX3
3.AD/0.HA	Immature	Down	GO BP	GOBP_POSITIVE_REGULATION_OF_MOLECULAR_FUNCTION	GOBP_POSITIVE_REGULATION_OF_MOLECULAR_FUNCTION	0.626998	0.00672922	0.204696	DNAJC19,FGFR2,HSP90AB1,SOD1,UBB,DYNLL1,TERF2IP,RPL11,RPS27L,COX17,MT3,B2M,ETAA1,RPS27A,UBC,CCND3,ERP29,CTSH,ERBB4,ALK,GNG3,HGF,HTR2A,PPIA,RPS3,YWHAB,RPLP1,RPS2,STMN1,JTB,CCND2,RACK1,GABARAPL2,TSC2,DOCK1,CALM2,IL6R,ATP1B1,P2RY12,TMSB4X,DOCK2,IQGAP2,PRNP,PDCD5,ARHGAP42,EDF1,DUSP12,NDUFA13,MTCH1,BEX3,BEX1
3.AD/0.HA	Immature	Down	GO BP	GOBP_CELLULAR_ION_HOMEOSTASIS	GOBP_CELLULAR_ION_HOMEOSTASIS	0.901545	0.00688635	0.207596	SLC9B1,SOD1,FTH1,FTL,MT3,ATP6V1D,ATP6V0C,ATP6V0B,ATP6AP1,ATP6V1F,ATP6AP2,GNG3,HTR2A,NUBP1,ARF1,CXCL12,CALM2,ATP1B1,LPAR6,PRNP,RYR3,CKB,TPT1,ATP13A4
3.AD/0.HA	Immature	Down	GO BP	GOBP_POSITIVE_REGULATION_OF_PHOSPHORUS_METABOLIC_PROCESS	GOBP_POSITIVE_REGULATION_OF_PHOSPHORUS_METABOLIC_PROCESS	0.767407	0.00690079	0.207596	FGFR2,HSP90AB1,SOD1,UBB,TERF2IP,MT3,ETAA1,RPS27A,UBC,CCND3,ERP29,ERBB4,ALK,GNG3,HGF,HTR2A,MIF,PPIA,RPS3,RPLP1,JTB,CCND2,RACK1,CALM2,IL6R,IL6ST,P2RY12,TMSB4X,PRNP,NIBAN1,PPP2R5A,DUSP12
3.AD/0.HA	Immature	Down	GO BP	GOBP_REGULATION_OF_CATABOLIC_PROCESS	GOBP_REGULATION_OF_CATABOLIC_PROCESS	0.777682	0.00730548	0.218562	HSP90AB1,UBB,RPL5,RPL11,MT3,ATP6V1D,ATP6V0C,ATP6V0B,RPS27A,UBC,RPL23,ALK,HGF,HTR2A,PSMB6,PSMC3,TIMP3,YWHAB,RPS7,HECW1,GAPDH,RACK1,CIRBP,GABARAPL2,TSC2,TAF9,CACNG7,FEZ1,CST3,EEF1A1,PGAM1,NDUFA13,TMEM150C
3.AD/0.HA	Immature	Down	GO BP	GOBP_NEGATIVE_REGULATION_OF_MUSCLE_CONTRACTION	GOBP_NEGATIVE_REGULATION_OF_MUSCLE_CONTRACTION	3.08711	0.00750809	0.223355	SOD1,CALCRL,ARHGAP42
3.AD/0.HA	Immature	Down	GO BP	GOBP_IRON_ION_HOMEOSTASIS	GOBP_IRON_ION_HOMEOSTASIS	1.89711	0.00754957	0.223355	SOD1,FTH1,FTL,ATP6AP1,B2M,NUBP1
3.AD/0.HA	Immature	Down	GO BP	GOBP_REGULATION_OF_ANATOMICAL_STRUCTURE_SIZE	GOBP_REGULATION_OF_ANATOMICAL_STRUCTURE_SIZE	1.01973	0.00760891	0.223355	HSP90AB1,SOD1,MT3,PER2,HTR2A,NEFL,ARF1,SOD2,OLFM1,CXCL12,SVIL,TMSB4X,AP2M1,IQGAP2,CHRM3,ARHGAP42,CFL2,ARPC5L,TMSB10
3.AD/0.HA	Immature	Down	GO BP	GOBP_PROTEIN_TRANSMEMBRANE_TRANSPORT	GOBP_PROTEIN_TRANSMEMBRANE_TRANSPORT	2.13567	0.00762975	0.223355	DNAJC19,TOMM7,TOMM20,TIMM17A,SEC62
3.AD/0.HA	Immature	Down	GO BP	GOBP_POSITIVE_REGULATION_OF_MAP_KINASE_ACTIVITY	GOBP_POSITIVE_REGULATION_OF_MAP_KINASE_ACTIVITY	1.29797	0.00777897	0.226505	SOD1,UBB,RPS27A,UBC,ERP29,ALK,GNG3,HGF,HTR2A,PPIA,RPS3
3.AD/0.HA	Immature	Down	GO BP	GOBP_DNA_DAMAGE_RESPONSE_DETECTION_OF_DNA_DAMAGE	GOBP_DNA_DAMAGE_RESPONSE_DETECTION_OF_DNA_DAMAGE	2.46323	0.00810077	0.234621	UBB,RPS27A,UBC,RPS3
3.AD/0.HA	Immature	Down	GO BP	GOBP_REGULATION_OF_PROTEIN_MODIFICATION_BY_SMALL_PROTEIN_CONJUGATION_OR_REMOVAL	GOBP_REGULATION_OF_PROTEIN_MODIFICATION_BY_SMALL_PROTEIN_CONJUGATION_OR_REMOVAL	1.27803	0.00853535	0.244077	HSP90AB1,UBB,RPL5,RPL11,PER2,RPL23,PPIA,RPS3,RPS2,RPS7,COPS9
3.AD/0.HA	Immature	Down	GO BP	GOBP_ERROR_PRONE_TRANSLESION_SYNTHESIS	GOBP_ERROR_PRONE_TRANSLESION_SYNTHESIS	3.00465	0.00862827	0.244077	UBB,RPS27A,UBC
3.AD/0.HA	Immature	Down	GO BP	GOBP_CELLULAR_RESPONSE_TO_OXYGEN_RADICAL	GOBP_CELLULAR_RESPONSE_TO_OXYGEN_RADICAL	3.00465	0.00862827	0.244077	SOD1,MT3,SOD2
3.AD/0.HA	Immature	Down	GO BP	GOBP_PURINE_CONTAINING_COMPOUND_BIOSYNTHETIC_PROCESS	GOBP_PURINE_CONTAINING_COMPOUND_BIOSYNTHETIC_PROCESS	1.34935	0.00864826	0.244077	TECR,ATP6V0C,MTAP,TMSB4X,ATP5F1C,ATP5F1D,ATP5F1E,ATP5MC1,ATP5ME,GUK1
3.AD/0.HA	Immature	Down	GO BP	GOBP_APOPTOTIC_MITOCHONDRIAL_CHANGES	GOBP_APOPTOTIC_MITOCHONDRIAL_CHANGES	1.67874	0.00865142	0.244077	ERBB4,HGF,YWHAB,SOD2,YWHAH,GGCT,PDCD5
3.AD/0.HA	Immature	Down	GO BP	GOBP_VIRION_ASSEMBLY	GOBP_VIRION_ASSEMBLY	2.4223	0.00885848	0.248631	UBB,RPS27A,UBC,PPIA
2.MCI/1.YC	Immature	Up	GO BP	GOBP_OXIDATIVE_PHOSPHORYLATION	GOBP_OXIDATIVE_PHOSPHORYLATION	8.08165	5.9272e-20	3.22736e-16	MT-ND5,MT-ND4,MT-ATP6,MT-ATP8,MT-CO2,MT-CO3,MT-CYB,MT-ND1,MT-ND2,MT-ND3,MT-ND4L
2.MCI/1.YC	Immature	Up	GO BP	GOBP_ATP_SYNTHESIS_COUPLED_ELECTRON_TRANSPORT	GOBP_ATP_SYNTHESIS_COUPLED_ELECTRON_TRANSPORT	7.90967	5.77766e-17	1.57297e-13	MT-ND5,MT-ND4,MT-CO2,MT-CO3,MT-CYB,MT-ND1,MT-ND2,MT-ND3,MT-ND4L
2.MCI/1.YC	Immature	Up	GO BP	GOBP_RESPIRATORY_ELECTRON_TRANSPORT_CHAIN	GOBP_RESPIRATORY_ELECTRON_TRANSPORT_CHAIN	7.65302	2.64306e-16	4.10604e-13	MT-ND5,MT-ND4,MT-CO2,MT-CO3,MT-CYB,MT-ND1,MT-ND2,MT-ND3,MT-ND4L
2.MCI/1.YC	Immature	Up	GO BP	GOBP_ATP_METABOLIC_PROCESS	GOBP_ATP_METABOLIC_PROCESS	6.91235	3.01637e-16	4.10604e-13	MT-ND5,MT-ND4,MT-ATP6,MT-ATP8,MT-CO2,MT-CO3,MT-CYB,MT-ND1,MT-ND2,MT-ND3,MT-ND4L
2.MCI/1.YC	Immature	Up	GO BP	GOBP_ELECTRON_TRANSPORT_CHAIN	GOBP_ELECTRON_TRANSPORT_CHAIN	7.0074	1.27006e-14	1.3831e-11	MT-ND5,MT-ND4,MT-CO2,MT-CO3,MT-CYB,MT-ND1,MT-ND2,MT-ND3,MT-ND4L
2.MCI/1.YC	Immature	Up	GO BP	GOBP_CELLULAR_RESPIRATION	GOBP_CELLULAR_RESPIRATION	6.90398	2.23837e-14	2.03132e-11	MT-ND5,MT-ND4,MT-CO2,MT-CO3,MT-CYB,MT-ND1,MT-ND2,MT-ND3,MT-ND4L
2.MCI/1.YC	Immature	Up	GO BP	GOBP_GENERATION_OF_PRECURSOR_METABOLITES_AND_ENERGY	GOBP_GENERATION_OF_PRECURSOR_METABOLITES_AND_ENERGY	6.11306	9.80272e-14	7.62511e-11	MT-ND5,MT-ND4,MT-ATP6,MT-ATP8,MT-CO2,MT-CO3,MT-CYB,MT-ND1,MT-ND2,MT-ND3,MT-ND4L
2.MCI/1.YC	Immature	Up	GO BP	GOBP_ENERGY_DERIVATION_BY_OXIDATION_OF_ORGANIC_COMPOUNDS	GOBP_ENERGY_DERIVATION_BY_OXIDATION_OF_ORGANIC_COMPOUNDS	6.2998	8.45555e-13	5.75506e-10	MT-ND5,MT-ND4,MT-CO2,MT-CO3,MT-CYB,MT-ND1,MT-ND2,MT-ND3,MT-ND4L
2.MCI/1.YC	Immature	Up	GO BP	GOBP_MITOCHONDRIAL_ELECTRON_TRANSPORT_NADH_TO_UBIQUINONE	GOBP_MITOCHONDRIAL_ELECTRON_TRANSPORT_NADH_TO_UBIQUINONE	7.69469	6.42322e-12	3.88605e-09	MT-ND5,MT-ND4,MT-ND1,MT-ND2,MT-ND3,MT-ND4L
2.MCI/1.YC	Immature	Up	GO BP	GOBP_PROTON_TRANSMEMBRANE_TRANSPORT	GOBP_PROTON_TRANSMEMBRANE_TRANSPORT	6.43883	5.49354e-11	2.99123e-08	MT-ND5,MT-ND4,MT-ATP6,MT-ATP8,MT-CO2,MT-CO3,MT-CYB
2.MCI/1.YC	Immature	Up	GO BP	GOBP_NADH_DEHYDROGENASE_COMPLEX_ASSEMBLY	GOBP_NADH_DEHYDROGENASE_COMPLEX_ASSEMBLY	6.95445	3.43318e-09	1.69942e-06	MT-ND5,MT-ND4,MT-ND1,MT-ND2,MT-ND3
2.MCI/1.YC	Immature	Up	GO BP	GOBP_MITOCHONDRIAL_RESPIRATORY_CHAIN_COMPLEX_ASSEMBLY	GOBP_MITOCHONDRIAL_RESPIRATORY_CHAIN_COMPLEX_ASSEMBLY	6.27286	3.22683e-08	1.46418e-05	MT-ND5,MT-ND4,MT-ND1,MT-ND2,MT-ND3
2.MCI/1.YC	Immature	Up	GO BP	GOBP_MITOCHONDRION_ORGANIZATION	GOBP_MITOCHONDRION_ORGANIZATION	4.5531	3.22349e-07	0.000135015	MT-ND5,MT-ND4,MT-ATP6,MT-ATP8,MT-ND1,MT-ND2,MT-ND3
2.MCI/1.YC	Immature	Up	GO BP	GOBP_AEROBIC_RESPIRATION	GOBP_AEROBIC_RESPIRATION	6.0722	1.14055e-06	0.000443591	MT-ND4,MT-CO2,MT-CO3,MT-ND1
2.MCI/1.YC	Immature	Up	GO BP	GOBP_INORGANIC_ION_TRANSMEMBRANE_TRANSPORT	GOBP_INORGANIC_ION_TRANSMEMBRANE_TRANSPORT	3.86057	6.82872e-06	0.00247883	MT-ND5,MT-ND4,MT-ATP6,MT-ATP8,MT-CO2,MT-CO3,MT-CYB
2.MCI/1.YC	Immature	Up	GO BP	GOBP_CATION_TRANSMEMBRANE_TRANSPORT	GOBP_CATION_TRANSMEMBRANE_TRANSPORT	3.81355	8.34235e-06	0.00283901	MT-ND5,MT-ND4,MT-ATP6,MT-ATP8,MT-CO2,MT-CO3,MT-CYB
2.MCI/1.YC	Immature	Up	GO BP	GOBP_ATP_BIOSYNTHETIC_PROCESS	GOBP_ATP_BIOSYNTHETIC_PROCESS	6.23819	1.70362e-05	0.00545658	MT-ATP6,MT-ATP8,MT-CO2
2.MCI/1.YC	Immature	Up	GO BP	GOBP_RIBONUCLEOSIDE_TRIPHOSPHATE_BIOSYNTHETIC_PROCESS	GOBP_RIBONUCLEOSIDE_TRIPHOSPHATE_BIOSYNTHETIC_PROCESS	5.83777	3.77436e-05	0.0114174	MT-ATP6,MT-ATP8,MT-CO2
2.MCI/1.YC	Immature	Up	GO BP	GOBP_CATION_TRANSPORT	GOBP_CATION_TRANSPORT	3.40191	4.75272e-05	0.0136203	MT-ND5,MT-ND4,MT-ATP6,MT-ATP8,MT-CO2,MT-CO3,MT-CYB
2.MCI/1.YC	Immature	Up	GO BP	GOBP_NUCLEOSIDE_TRIPHOSPHATE_BIOSYNTHETIC_PROCESS	GOBP_NUCLEOSIDE_TRIPHOSPHATE_BIOSYNTHETIC_PROCESS	5.61415	5.88024e-05	0.0160089	MT-ATP6,MT-ATP8,MT-CO2
2.MCI/1.YC	Immature	Up	GO BP	GOBP_RIBONUCLEOSIDE_TRIPHOSPHATE_METABOLIC_PROCESS	GOBP_RIBONUCLEOSIDE_TRIPHOSPHATE_METABOLIC_PROCESS	5.56156	6.56431e-05	0.0170203	MT-ATP6,MT-ATP8,MT-CO2
2.MCI/1.YC	Immature	Up	GO BP	GOBP_NUCLEOSIDE_TRIPHOSPHATE_METABOLIC_PROCESS	GOBP_NUCLEOSIDE_TRIPHOSPHATE_METABOLIC_PROCESS	5.20957	0.000132195	0.0327184	MT-ATP6,MT-ATP8,MT-CO2
2.MCI/1.YC	Immature	Up	GO BP	GOBP_MITOCHONDRIAL_ELECTRON_TRANSPORT_CYTOCHROME_C_TO_OXYGEN	GOBP_MITOCHONDRIAL_ELECTRON_TRANSPORT_CYTOCHROME_C_TO_OXYGEN	7.02252	0.000165946	0.039286	MT-CO2,MT-CO3
2.MCI/1.YC	Immature	Up	GO BP	GOBP_MITOCHONDRIAL_ATP_SYNTHESIS_COUPLED_PROTON_TRANSPORT	GOBP_MITOCHONDRIAL_ATP_SYNTHESIS_COUPLED_PROTON_TRANSPORT	6.86919	0.000201527	0.0438927	MT-ATP6,MT-ATP8
2.MCI/1.YC	Immature	Up	GO BP	GOBP_RESPONSE_TO_HYPEROXIA	GOBP_RESPONSE_TO_HYPEROXIA	6.86919	0.000201527	0.0438927	MT-ATP6,MT-CYB
2.MCI/1.YC	Immature	Up	GO BP	GOBP_CELLULAR_PROTEIN_CONTAINING_COMPLEX_ASSEMBLY	GOBP_CELLULAR_PROTEIN_CONTAINING_COMPLEX_ASSEMBLY	3.2379	0.000220214	0.0461179	MT-ND5,MT-ND4,MT-CO3,MT-ND1,MT-ND2,MT-ND3
2.MCI/1.YC	Immature	Up	GO BP	GOBP_ATP_SYNTHESIS_COUPLED_PROTON_TRANSPORT	GOBP_ATP_SYNTHESIS_COUPLED_PROTON_TRANSPORT	6.60604	0.000282893	0.0570501	MT-ATP6,MT-ATP8
2.MCI/1.YC	Immature	Up	GO BP	GOBP_RESPONSE_TO_INCREASED_OXYGEN_LEVELS	GOBP_RESPONSE_TO_INCREASED_OXYGEN_LEVELS	6.43834	0.0003528	0.0686069	MT-ATP6,MT-CYB
2.MCI/1.YC	Immature	Up	GO BP	GOBP_TRANSMEMBRANE_TRANSPORT	GOBP_TRANSMEMBRANE_TRANSPORT	2.88096	0.000383713	0.0699489	MT-ND5,MT-ND4,MT-ATP6,MT-ATP8,MT-CO2,MT-CO3,MT-CYB
2.MCI/1.YC	Immature	Up	GO BP	GOBP_RESPONSE_TO_OXYGEN_LEVELS	GOBP_RESPONSE_TO_OXYGEN_LEVELS	3.85362	0.000385393	0.0699489	MT-ND5,MT-ND4,MT-ATP6,MT-CYB
2.MCI/1.YC	Immature	Up	GO BP	GOBP_CRISTAE_FORMATION	GOBP_CRISTAE_FORMATION	6.14765	0.000515282	0.0905068	MT-ATP6,MT-ATP8
2.MCI/1.YC	Immature	Up	GO BP	GOBP_RESPONSE_TO_ABIOTIC_STIMULUS	GOBP_RESPONSE_TO_ABIOTIC_STIMULUS	2.94985	0.000602023	0.102438	MT-ND5,MT-ND4,MT-ATP6,MT-CO2,MT-CYB,MT-ND3
2.MCI/1.YC	Immature	Up	GO BP	GOBP_RIBOSE_PHOSPHATE_BIOSYNTHETIC_PROCESS	GOBP_RIBOSE_PHOSPHATE_BIOSYNTHETIC_PROCESS	4.33643	0.000743046	0.122603	MT-ATP6,MT-ATP8,MT-CO2
2.MCI/1.YC	Immature	Up	GO BP	GOBP_PURINE_CONTAINING_COMPOUND_BIOSYNTHETIC_PROCESS	GOBP_PURINE_CONTAINING_COMPOUND_BIOSYNTHETIC_PROCESS	4.24404	0.000888274	0.142254	MT-ATP6,MT-ATP8,MT-CO2
2.MCI/1.YC	Immature	Up	GO BP	GOBP_INNER_MITOCHONDRIAL_MEMBRANE_ORGANIZATION	GOBP_INNER_MITOCHONDRIAL_MEMBRANE_ORGANIZATION	5.46314	0.00127158	0.197821	MT-ATP6,MT-ATP8
2.MCI/1.YC	Immature	Down	GO BP	GOBP_BIOLOGICAL_ADHESION	GOBP_BIOLOGICAL_ADHESION	1.4105	8.36217e-09	4.5532e-05	NECTIN3,CLDN11,LEF1,PDGFRA,PTN,VEGFA,JCAD,TPBG,SPRY4,EFNA5,EPHA3,PHLDB2,FAP,CDH6,CDH7,CDH12,CNTN4,NTNG1,PLXND1,CNTN6,RHOH,MAG,PTPRD,NTN4,CNTN2,DCHS1,COL6A1,HAPLN1,FMN1,ITGA11,CTNNA3,DCHS2,MTSS1,EPB41L4B,ADAMTS9,ADTRP,COL12A1,GPC6,ASTN2,NDNF,VAV3,ADAMTS18,TESPA1,CDH23,PTPRT,MMRN1,MYBPC1,NT5E,FRMD5,PCDH11X,PCDH11Y,NINJ2,CERCAM,VWC2,PDZD2
2.MCI/1.YC	Immature	Down	GO BP	GOBP_SYNAPTIC_SIGNALING	GOBP_SYNAPTIC_SIGNALING	1.60248	2.8399e-07	0.000773163	ADCYAP1,EDN1,PTN,CUX2,MEF2C,HTR2A,TPBG,CNTN4,NTNG1,PTPRD,RIMS2,GLRA2,SLC29A1,KMO,RIMS3,CHRM2,CACNG5,CACNG4,SLC6A1,SLC17A6,PLCB4,PDE7B,GABRG1,SV2C,HCRTR2,GRIK3,GRM8,HTR1F,HTR3B,GRIK1,GRID2IP,PMP22
2.MCI/1.YC	Immature	Down	GO BP	GOBP_BLOOD_VESSEL_MORPHOGENESIS	GOBP_BLOOD_VESSEL_MORPHOGENESIS	1.68022	5.11821e-07	0.000837784	DCN,EDN1,EPAS1,FGF10,SULF1,LRP2,LEF1,PDGFRA,PDGFRB,SERPINF1,PTN,VEGFA,BMPER,FLT1,JCAD,FAP,PLXND1,MEIS1,EDNRA,ENPEP,NR4A1,ADAMTS9,ADTRP,NDNF,VAV3,ADGRF5,CALCRL,PLXDC1
2.MCI/1.YC	Immature	Down	GO BP	GOBP_CELL_CELL_ADHESION_VIA_PLASMA_MEMBRANE_ADHESION_MOLECULES	GOBP_CELL_CELL_ADHESION_VIA_PLASMA_MEMBRANE_ADHESION_MOLECULES	2.14356	7.11558e-07	0.000837784	NECTIN3,CLDN11,CDH6,CDH7,CDH12,CNTN4,NTNG1,CNTN6,MAG,PTPRD,CNTN2,DCHS1,DCHS2,GPC6,CDH23,PTPRT,PCDH11X,PCDH11Y
2.MCI/1.YC	Immature	Down	GO BP	GOBP_EXTERNAL_ENCAPSULATING_STRUCTURE_ORGANIZATION	GOBP_EXTERNAL_ENCAPSULATING_STRUCTURE_ORGANIZATION	1.89297	7.69315e-07	0.000837784	DCN,SULF1,PDGFRA,PHLDB2,FAP,NTNG1,NTN4,COL6A1,HAPLN1,COL27A1,ADAMTS4,ITGA11,SMOC1,ADAMTS9,ADTRP,COL12A1,NDNF,ADAMTS18,MYH11,ADAMTS20,PXDN,COL9A1
2.MCI/1.YC	Immature	Down	GO BP	GOBP_VASCULATURE_DEVELOPMENT	GOBP_VASCULATURE_DEVELOPMENT	1.53599	1.48498e-06	0.00124057	DCN,EDN1,EPAS1,FGF10,SULF1,LRP2,LEF1,PDGFRA,PDGFRB,SERPINF1,PTN,VEGFA,MEF2C,BMPER,FLT1,JCAD,PDGFD,FAP,PLXND1,MEIS1,EDNRA,ENPEP,NR4A1,ADAMTS9,ADTRP,NDNF,VAV3,ADGRF5,CALCRL,PLXDC1
2.MCI/1.YC	Immature	Down	GO BP	GOBP_CELL_JUNCTION_ORGANIZATION	GOBP_CELL_JUNCTION_ORGANIZATION	1.52232	1.77308e-06	0.00124057	NECTIN3,CLDN11,PTN,VEGFA,CUX2,MEF2C,ERBB4,TPBG,EFNA5,EPHA3,PHLDB2,CDH6,CDH7,CDH12,NTNG1,PLXND1,WHRN,PTPRD,CNTN2,UGT8,DCHS1,FMN1,GJB6,GPC6,PTPRT,SLC6A1,LRRTM3,IL1RAPL2,PDZRN3,C1QL1
2.MCI/1.YC	Immature	Down	GO BP	GOBP_REGULATION_OF_SYNAPTIC_TRANSMISSION_GLUTAMATERGIC	GOBP_REGULATION_OF_SYNAPTIC_TRANSMISSION_GLUTAMATERGIC	3.21181	1.82269e-06	0.00124057	ADCYAP1,MEF2C,HTR2A,KMO,CACNG5,CACNG4,GRIK3,GRM8,GRIK1
2.MCI/1.YC	Immature	Down	GO BP	GOBP_SYNAPTIC_TRANSMISSION_GLUTAMATERGIC	GOBP_SYNAPTIC_TRANSMISSION_GLUTAMATERGIC	2.94616	2.25041e-06	0.00124336	ADCYAP1,MEF2C,HTR2A,KMO,CACNG5,CACNG4,SLC17A6,GRIK3,GRM8,GRIK1
2.MCI/1.YC	Immature	Down	GO BP	GOBP_ANATOMICAL_STRUCTURE_FORMATION_INVOLVED_IN_MORPHOGENESIS	GOBP_ANATOMICAL_STRUCTURE_FORMATION_INVOLVED_IN_MORPHOGENESIS	1.31504	2.28349e-06	0.00124336	DCN,EDN1,EPAS1,FGF10,SULF1,LRP2,LEF1,PDGFRA,PDGFRB,SERPINF1,PTN,VEGFA,MEF2C,BMPER,FLT1,JCAD,PHLDB2,FAP,PLXND1,WHRN,UGT8,DCHS1,COL6A1,FMN1,MEIS1,EDNRA,ENPEP,NR4A1,ADAMTS9,ADTRP,COL12A1,NKD1,NDNF,VAV3,CALCRL,PLXDC1,MYH11,PMP22,MOBP
2.MCI/1.YC	Immature	Down	GO BP	GOBP_HOMOPHILIC_CELL_ADHESION_VIA_PLASMA_MEMBRANE_ADHESION_MOLECULES	GOBP_HOMOPHILIC_CELL_ADHESION_VIA_PLASMA_MEMBRANE_ADHESION_MOLECULES	2.38079	4.31577e-06	0.00213631	NECTIN3,CDH6,CDH7,CDH12,CNTN4,CNTN6,CNTN2,DCHS1,DCHS2,CDH23,PTPRT,PCDH11X,PCDH11Y
2.MCI/1.YC	Immature	Down	GO BP	GOBP_TUBE_MORPHOGENESIS	GOBP_TUBE_MORPHOGENESIS	1.39744	5.59399e-06	0.00253827	DCN,EDN1,EPAS1,FGF10,SULF1,LRP2,LEF1,PDGFRA,PDGFRB,SERPINF1,PTN,VEGFA,MEF2C,BMPER,FLT1,JCAD,FAP,PLXND1,DCHS1,FMN1,MEIS1,EDNRA,ENPEP,MTSS1,NR4A1,ADAMTS9,ADTRP,NDNF,VAV3,ADGRF5,CALCRL,PLXDC1
2.MCI/1.YC	Immature	Down	GO BP	GOBP_NEUROGENESIS	GOBP_NEUROGENESIS	1.11247	6.8733e-06	0.00278283	SEMA3A,ADCYAP1,FGF10,LRP2,LEF1,SERPINF1,PTN,THRB,VEGFA,DNMT3B,CUX2,MEF2C,ERBB4,DOK5,TPBG,MYLIP,EFNA5,EPHA3,BRINP3,BRINP2,CPNE9,CNTN4,NTNG1,FSTL4,PLXND1,WHRN,CNTN6,RHOH,MAG,DPYSL5,PTPRD,NTN4,CNTN2,UGT8,DCHS1,RIMS2,MEIS1,SOX6,MAN2A1,ASTN2,NKD1,NDNF,TOX,CDH23,GPR17,KLK6,KLHL1,VWC2,VWC2L,MOBP,C1QL1
2.MCI/1.YC	Immature	Down	GO BP	GOBP_UROGENITAL_SYSTEM_DEVELOPMENT	GOBP_UROGENITAL_SYSTEM_DEVELOPMENT	1.88883	7.15512e-06	0.00278283	DCN,FGF10,SULF1,LRP2,PDGFRA,PDGFRB,SERPINF1,VEGFA,MEF2C,BMPER,PDGFD,PLXND1,DCHS1,FMN1,ENPEP,DCHS2,FRAS1,MTSS1
2.MCI/1.YC	Immature	Down	GO BP	GOBP_CELL_JUNCTION_ASSEMBLY	GOBP_CELL_JUNCTION_ASSEMBLY	1.70886	8.37166e-06	0.00300994	CLDN11,VEGFA,CUX2,MEF2C,ERBB4,TPBG,EFNA5,EPHA3,PHLDB2,CDH6,CDH7,CDH12,PLXND1,PTPRD,UGT8,DCHS1,FMN1,GJB6,GPC6,LRRTM3,IL1RAPL2
2.MCI/1.YC	Immature	Down	GO BP	GOBP_REGULATION_OF_MEMBRANE_POTENTIAL	GOBP_REGULATION_OF_MEMBRANE_POTENTIAL	1.69781	9.32629e-06	0.00300994	ADCYAP1,DCN,EDN1,PTN,CUX2,MEF2C,KCNH5,RIMS2,GLRA2,SLC29A1,RIMS3,CTNNA3,ADRB1,CACNG4,TAFA4,PIEZO2,KCNH7,GABRG1,GRIK3,HTR3B,GRIK1
2.MCI/1.YC	Immature	Down	GO BP	GOBP_CELL_MIGRATION	GOBP_CELL_MIGRATION	1.11873	9.39742e-06	0.00300994	SEMA3A,DCN,EDN1,FGF10,SULF1,LEF1,PDGFRA,PDGFRB,SERPINF1,PTN,VEGFA,NOX4,MEF2C,NDE1,SH3RF2,BMPER,ERBB4,FLT1,JCAD,TPBG,PDGFD,EPHA3,PHLDB2,FAP,ANLN,NTNG1,PLXND1,RHOH,MAG,NTN4,DCHS1,ITGA11,CTNNA3,ENPEP,NR4A1,EPB41L4B,ADAMTS9,PRR5L,ADTRP,GPC6,ASTN2,NKD1,NDNF,VAV3,PTPRT,DAPK2,TAFA4,FRMD5
2.MCI/1.YC	Immature	Down	GO BP	GOBP_SENSORY_ORGAN_DEVELOPMENT	GOBP_SENSORY_ORGAN_DEVELOPMENT	1.56103	1.06077e-05	0.00306731	EDN1,FGF10,NECTIN3,LEF1,PDGFRA,PDGFRB,SERPINF1,PTN,THRB,VEGFA,BMPER,FLT1,WHRN,DCHS1,MEIS1,SMOC1,GJB6,MAN2A1,NKD1,ADAMTS18,CDH23,NHS,SLC17A6,KCNQ4
2.MCI/1.YC	Immature	Down	GO BP	GOBP_TISSUE_MIGRATION	GOBP_TISSUE_MIGRATION	1.90697	1.07032e-05	0.00306731	SEMA3A,DCN,EDN1,FGF10,SERPINF1,PTN,VEGFA,MEF2C,BMPER,JCAD,FAP,ANLN,PLXND1,NR4A1,EPB41L4B,ADAMTS9,ADTRP
2.MCI/1.YC	Immature	Down	GO BP	GOBP_LOCOMOTION	GOBP_LOCOMOTION	1.0334	1.13408e-05	0.00308753	SEMA3A,CCNYL1,DCN,EDN1,FGF10,SULF1,LEF1,PDGFRA,PDGFRB,SERPINF1,PTN,VEGFA,TF,NOX4,MEF2C,NDE1,SH3RF2,BMPER,ERBB4,FLT1,DOK5,JCAD,TPBG,PDGFD,EFNA5,EPHA3,PHLDB2,FAP,ANLN,CNTN4,NTNG1,PLXND1,CNTN6,RHOH,MAG,DPYSL5,NTN4,CNTN2,DCHS1,ITGA11,CTNNA3,ENPEP,NR4A1,EPB41L4B,ADAMTS9,PRR5L,ADTRP,GPC6,ASTN2,NKD1,NDNF,VAV3,PTPRT,DAPK2,TAFA4,FRMD5
2.MCI/1.YC	Immature	Down	GO BP	GOBP_CELLULAR_COMPONENT_MORPHOGENESIS	GOBP_CELLULAR_COMPONENT_MORPHOGENESIS	1.36891	1.41449e-05	0.00354568	SEMA3A,EDN1,LRP2,PDGFRA,PDGFRB,PTN,VEGFA,CUX2,DOK5,TPBG,EFNA5,EPHA3,PHLDB2,CPNE9,CNTN4,NTNG1,FSTL4,PLXND1,CNTN6,RHOH,MAG,DPYSL5,PTPRD,NTN4,CNTN2,UGT8,RIMS2,MYH11,PMP22,MOBP
2.MCI/1.YC	Immature	Down	GO BP	GOBP_AMEBOIDAL_TYPE_CELL_MIGRATION	GOBP_AMEBOIDAL_TYPE_CELL_MIGRATION	1.70087	1.4326e-05	0.00354568	SEMA3A,DCN,EDN1,FGF10,SERPINF1,PTN,VEGFA,MEF2C,BMPER,ERBB4,JCAD,TPBG,FAP,ANLN,PLXND1,NR4A1,EPB41L4B,ADAMTS9,PRR5L,ADTRP
2.MCI/1.YC	Immature	Down	GO BP	GOBP_CARDIAC_MUSCLE_TISSUE_DEVELOPMENT	GOBP_CARDIAC_MUSCLE_TISSUE_DEVELOPMENT	2.16862	1.8637e-05	0.0042557	EDN1,LRP2,PDGFRA,PDGFRB,VEGFA,MEF2C,ERBB4,MEIS1,SOX6,ADAMTS9,PI16,MYH11,SGCZ
2.MCI/1.YC	Immature	Down	GO BP	GOBP_NEPHRON_DEVELOPMENT	GOBP_NEPHRON_DEVELOPMENT	2.41164	1.87579e-05	0.0042557	SULF1,PDGFRA,PDGFRB,VEGFA,MEF2C,PDGFD,DCHS1,FMN1,ENPEP,DCHS2,MTSS1
2.MCI/1.YC	Immature	Down	GO BP	GOBP_CIRCULATORY_SYSTEM_DEVELOPMENT	GOBP_CIRCULATORY_SYSTEM_DEVELOPMENT	1.20591	2.36045e-05	0.00514105	DCN,EDN1,EPAS1,FGF10,SULF1,LRP2,LEF1,PDGFRA,PDGFRB,SERPINF1,PTN,VEGFA,MEF2C,BMPER,ERBB4,FLT1,JCAD,PDGFD,FAP,PLXND1,DCHS1,MEIS1,SOX6,EDNRA,ENPEP,NR4A1,ADAMTS9,ADTRP,NDNF,VAV3,ADGRF5,CALCRL,PLXDC1,PI16,MYH11,SGCZ
2.MCI/1.YC	Immature	Down	GO BP	GOBP_NEURON_DIFFERENTIATION	GOBP_NEURON_DIFFERENTIATION	1.08625	3.13277e-05	0.00617869	SEMA3A,ADCYAP1,LRP2,SERPINF1,PTN,THRB,VEGFA,DNMT3B,CUX2,MEF2C,ERBB4,DOK5,TPBG,MYLIP,EFNA5,EPHA3,BRINP3,BRINP2,CPNE9,CNTN4,NTNG1,FSTL4,PLXND1,WHRN,CNTN6,RHOH,MAG,DPYSL5,PTPRD,NTN4,CNTN2,UGT8,RIMS2,MEIS1,NKD1,NDNF,TOX,CDH23,KLK6,KLHL1,VWC2,VWC2L,C1QL1
2.MCI/1.YC	Immature	Down	GO BP	GOBP_CELL_MORPHOGENESIS	GOBP_CELL_MORPHOGENESIS	1.20312	3.17729e-05	0.00617869	SEMA3A,LRP2,LEF1,PTN,VEGFA,NOX4,CUX2,MEF2C,DOK5,TPBG,SPRY4,EFNA5,EPHA3,CDH6,CDH7,CDH12,SHROOM1,CPNE9,CNTN4,SH3D19,NTNG1,FSTL4,PLXND1,WHRN,CNTN6,RHOH,MAG,DPYSL5,ERMN,PTPRD,NTN4,CNTN2,UGT8,DCHS1,RIMS2
2.MCI/1.YC	Immature	Down	GO BP	GOBP_REGULATION_OF_TRANS_SYNAPTIC_SIGNALING	GOBP_REGULATION_OF_TRANS_SYNAPTIC_SIGNALING	1.61352	4.89216e-05	0.00887928	ADCYAP1,EDN1,PTN,CUX2,MEF2C,HTR2A,CNTN4,NTNG1,PTPRD,RIMS2,KMO,RIMS3,CACNG5,CACNG4,PLCB4,GRIK3,GRM8,GRIK1,GRID2IP
2.MCI/1.YC	Immature	Down	GO BP	GOBP_CELL_CELL_ADHESION	GOBP_CELL_CELL_ADHESION	1.23599	5.18494e-05	0.00897376	NECTIN3,CLDN11,LEF1,PDGFRA,VEGFA,EFNA5,CDH6,CDH7,CDH12,CNTN4,NTNG1,CNTN6,RHOH,MAG,PTPRD,CNTN2,DCHS1,CTNNA3,DCHS2,ADTRP,GPC6,ASTN2,ADAMTS18,TESPA1,CDH23,PTPRT,NT5E,PCDH11X,PCDH11Y,NINJ2,CERCAM
2.MCI/1.YC	Immature	Down	GO BP	GOBP_TUBE_DEVELOPMENT	GOBP_TUBE_DEVELOPMENT	1.17277	5.53585e-05	0.00897376	DCN,EDN1,EPAS1,FGF10,SULF1,LRP2,LEF1,PDGFRA,PDGFRB,SERPINF1,PTN,THRB,VEGFA,MEF2C,BMPER,FLT1,JCAD,FAP,PLXND1,DCHS1,FMN1,MEIS1,EDNRA,ENPEP,MTSS1,NR4A1,ADAMTS9,ADTRP,MAN2A1,NDNF,VAV3,ADGRF5,CALCRL,PLXDC1
2.MCI/1.YC	Immature	Down	GO BP	GOBP_ENDOTHELIAL_CELL_MIGRATION	GOBP_ENDOTHELIAL_CELL_MIGRATION	2.00501	5.57277e-05	0.00897376	DCN,EDN1,SERPINF1,PTN,VEGFA,MEF2C,BMPER,JCAD,FAP,PLXND1,NR4A1,ADAMTS9,ADTRP
2.MCI/1.YC	Immature	Down	GO BP	GOBP_VASCULAR_ENDOTHELIAL_GROWTH_FACTOR_SIGNALING_PATHWAY	GOBP_VASCULAR_ENDOTHELIAL_GROWTH_FACTOR_SIGNALING_PATHWAY	3.36585	5.60345e-05	0.00897376	DCN,PDGFRA,PDGFRB,VEGFA,FLT1,JCAD
2.MCI/1.YC	Immature	Down	GO BP	GOBP_CELLULAR_RESPONSE_TO_VASCULAR_ENDOTHELIAL_GROWTH_FACTOR_STIMULUS	GOBP_CELLULAR_RESPONSE_TO_VASCULAR_ENDOTHELIAL_GROWTH_FACTOR_STIMULUS	2.99345	6.02596e-05	0.00911717	DCN,PDGFRA,PDGFRB,VEGFA,FLT1,JCAD,NR4A1
2.MCI/1.YC	Immature	Down	GO BP	GOBP_NEUROPEPTIDE_SIGNALING_PATHWAY	GOBP_NEUROPEPTIDE_SIGNALING_PATHWAY	2.52124	6.02788e-05	0.00911717	ADCYAP1,GPR149,TAC3,GLRA2,GALR1,HCRTR2,SORCS1,QRFPR,MCHR2
2.MCI/1.YC	Immature	Down	GO BP	GOBP_GLOMERULUS_DEVELOPMENT	GOBP_GLOMERULUS_DEVELOPMENT	2.96643	6.71127e-05	0.00987644	SULF1,PDGFRA,PDGFRB,MEF2C,PDGFD,ENPEP,MTSS1
2.MCI/1.YC	Immature	Down	GO BP	GOBP_TAXIS	GOBP_TAXIS	1.36256	7.94648e-05	0.0113865	SEMA3A,EDN1,FGF10,LEF1,PDGFRA,PDGFRB,PTN,VEGFA,FLT1,DOK5,TPBG,PDGFD,EFNA5,EPHA3,CNTN4,PLXND1,CNTN6,RHOH,DPYSL5,NTN4,CNTN2,NR4A1,VAV3,DAPK2,TAFA4
2.MCI/1.YC	Immature	Down	GO BP	GOBP_REGULATION_OF_POSTSYNAPTIC_MEMBRANE_POTENTIAL	GOBP_REGULATION_OF_POSTSYNAPTIC_MEMBRANE_POTENTIAL	2.28012	8.90534e-05	0.0118592	ADCYAP1,CUX2,MEF2C,RIMS2,GLRA2,SLC29A1,ADRB1,GABRG1,GRIK3,GRIK1
2.MCI/1.YC	Immature	Down	GO BP	GOBP_NEURON_PROJECTION_ARBORIZATION	GOBP_NEURON_PROJECTION_ARBORIZATION	3.70431	8.91869e-05	0.0118592	SEMA3A,LRP2,PTN,TPBG,NTNG1
2.MCI/1.YC	Immature	Down	GO BP	GOBP_BASEMENT_MEMBRANE_ASSEMBLY	GOBP_BASEMENT_MEMBRANE_ASSEMBLY	4.44132	8.92978e-05	0.0118592	PHLDB2,NTNG1,NTN4,PXDN
2.MCI/1.YC	Immature	Down	GO BP	GOBP_REGULATION_OF_CELL_JUNCTION_ASSEMBLY	GOBP_REGULATION_OF_CELL_JUNCTION_ASSEMBLY	2.02315	9.37504e-05	0.0121541	VEGFA,CUX2,MEF2C,TPBG,EFNA5,EPHA3,PHLDB2,PTPRD,FMN1,GPC6,LRRTM3,IL1RAPL2
2.MCI/1.YC	Immature	Down	GO BP	GOBP_REGULATION_OF_PHOSPHOLIPASE_C_ACTIVITY	GOBP_REGULATION_OF_PHOSPHOLIPASE_C_ACTIVITY	3.1727	0.000108867	0.0137856	PDGFRA,PDGFRB,FLT1,HTR2A,EDNRA,TXK
2.MCI/1.YC	Immature	Down	GO BP	GOBP_SENSORY_SYSTEM_DEVELOPMENT	GOBP_SENSORY_SYSTEM_DEVELOPMENT	1.57447	0.000155937	0.0188065	SEMA3A,FGF10,NECTIN3,PDGFRA,PDGFRB,SERPINF1,PTN,THRB,VEGFA,FLT1,MEIS1,SMOC1,MAN2A1,NKD1,ADAMTS18,NHS,SLC17A6
2.MCI/1.YC	Immature	Down	GO BP	GOBP_REGULATION_OF_CELLULAR_COMPONENT_MOVEMENT	GOBP_REGULATION_OF_CELLULAR_COMPONENT_MOVEMENT	1.11582	0.00015888	0.0188065	SEMA3A,DCN,EDN1,FGF10,SULF1,LEF1,PDGFRA,PDGFRB,SERPINF1,PTN,VEGFA,TF,NOX4,MEF2C,SH3RF2,BMPER,ERBB4,FLT1,JCAD,PDGFD,PHLDB2,NTNG1,PLXND1,RHOH,CTNNA3,EPB41L4B,ADAMTS9,PRR5L,ADTRP,NKD1,PTPRT,DAPK2,FRMD5
2.MCI/1.YC	Immature	Down	GO BP	GOBP_REGULATION_OF_PHOSPHOLIPASE_ACTIVITY	GOBP_REGULATION_OF_PHOSPHOLIPASE_ACTIVITY	2.74322	0.00016234	0.0188072	PDGFRA,PDGFRB,FLT1,HTR2A,EDNRA,TXK,PLA2R1
2.MCI/1.YC	Immature	Down	GO BP	GOBP_DEVELOPMENTAL_GROWTH	GOBP_DEVELOPMENTAL_GROWTH	1.35138	0.00016985	0.0192303	SEMA3A,EDN1,FGF10,GPR149,PDGFRB,PTN,VEGFA,MEF2C,ERBB4,GHR,CPNE9,FSTL4,MAG,RIMS2,FMN1,MEIS1,COL27A1,ADRB1,NKD1,TXK,PI16,KLK6,NINJ2
2.MCI/1.YC	Immature	Down	GO BP	GOBP_BRANCHING_INVOLVED_IN_BLOOD_VESSEL_MORPHOGENESIS	GOBP_BRANCHING_INVOLVED_IN_BLOOD_VESSEL_MORPHOGENESIS	3.47236	0.000173055	0.0192303	EDN1,LEF1,VEGFA,PLXND1,EDNRA
2.MCI/1.YC	Immature	Down	GO BP	GOBP_REGULATION_OF_LIPASE_ACTIVITY	GOBP_REGULATION_OF_LIPASE_ACTIVITY	2.47354	0.000187322	0.0203994	PDGFRA,PDGFRB,FLT1,HTR2A,EDNRA,TXK,PLA2R1,LIPC
2.MCI/1.YC	Immature	Down	GO BP	GOBP_NEGATIVE_REGULATION_OF_COAGULATION	GOBP_NEGATIVE_REGULATION_OF_COAGULATION	3.00245	0.000195236	0.0208443	EDN1,PDGFRA,FAP,ADTRP,ADAMTS18,HS3ST5
2.MCI/1.YC	Immature	Down	GO BP	GOBP_NEURON_DEVELOPMENT	GOBP_NEURON_DEVELOPMENT	1.05298	0.000213289	0.0223338	SEMA3A,ADCYAP1,LRP2,SERPINF1,PTN,THRB,VEGFA,CUX2,MEF2C,DOK5,TPBG,MYLIP,EFNA5,EPHA3,CPNE9,CNTN4,NTNG1,FSTL4,PLXND1,WHRN,CNTN6,RHOH,MAG,DPYSL5,PTPRD,NTN4,CNTN2,UGT8,RIMS2,NDNF,TOX,CDH23,KLK6,KLHL1,C1QL1
2.MCI/1.YC	Immature	Down	GO BP	GOBP_CELLULAR_COMPONENT_ASSEMBLY_INVOLVED_IN_MORPHOGENESIS	GOBP_CELLULAR_COMPONENT_ASSEMBLY_INVOLVED_IN_MORPHOGENESIS	2.40853	0.000249162	0.0255979	EDN1,PDGFRA,PDGFRB,PHLDB2,UGT8,MYH11,PMP22,MOBP
2.MCI/1.YC	Immature	Down	GO BP	GOBP_CARDIAC_MUSCLE_CELL_DIFFERENTIATION	GOBP_CARDIAC_MUSCLE_CELL_DIFFERENTIATION	2.3923	0.000266983	0.026648	EDN1,PDGFRA,PDGFRB,VEGFA,MEF2C,SOX6,PI16,MYH11
2.MCI/1.YC	Immature	Down	GO BP	GOBP_MORPHOGENESIS_OF_A_BRANCHING_STRUCTURE	GOBP_MORPHOGENESIS_OF_A_BRANCHING_STRUCTURE	1.95003	0.000269171	0.026648	SEMA3A,EDN1,FGF10,SULF1,LEF1,VEGFA,PLXND1,ERMN,NTN4,DCHS1,EDNRA
2.MCI/1.YC	Immature	Down	GO BP	GOBP_BRANCHING_INVOLVED_IN_SALIVARY_GLAND_MORPHOGENESIS	GOBP_BRANCHING_INVOLVED_IN_SALIVARY_GLAND_MORPHOGENESIS	3.90116	0.000296794	0.0288212	SEMA3A,FGF10,PLXND1,NTN4
2.MCI/1.YC	Immature	Down	GO BP	GOBP_INOSITOL_LIPID_MEDIATED_SIGNALING	GOBP_INOSITOL_LIPID_MEDIATED_SIGNALING	1.90853	0.000338819	0.031808	DCN,EDN1,PDGFRA,PDGFRB,ERBB4,FLT1,HTR2A,PDGFD,PRR5L,PLCH1,PLCB4
2.MCI/1.YC	Immature	Down	GO BP	GOBP_ADENYLATE_CYCLASE_MODULATING_G_PROTEIN_COUPLED_RECEPTOR_SIGNALING_PATHWAY	GOBP_ADENYLATE_CYCLASE_MODULATING_G_PROTEIN_COUPLED_RECEPTOR_SIGNALING_PATHWAY	1.7637	0.000442011	0.0382024	ADCYAP1,EDN1,VIP,EDNRA,ADRB1,CALCRL,CHRM2,GALR1,GRIK3,GRM8,HTR1F,RXFP1
2.MCI/1.YC	Immature	Down	GO BP	GOBP_REGULATION_OF_EPITHELIAL_CELL_MIGRATION	GOBP_REGULATION_OF_EPITHELIAL_CELL_MIGRATION	1.7637	0.000442011	0.0382024	SEMA3A,DCN,EDN1,FGF10,SERPINF1,PTN,VEGFA,MEF2C,BMPER,JCAD,EPB41L4B,ADAMTS9
2.MCI/1.YC	Immature	Down	GO BP	GOBP_SENSORY_PERCEPTION_OF_MECHANICAL_STIMULUS	GOBP_SENSORY_PERCEPTION_OF_MECHANICAL_STIMULUS	1.95782	0.000478574	0.0407162	LRP2,THRB,HTR2A,WHRN,GJB6,CDH23,OTOGL,PIEZO2,KCNQ4,LHFPL3
2.MCI/1.YC	Immature	Down	GO BP	GOBP_REGULATION_OF_ANATOMICAL_STRUCTURE_MORPHOGENESIS	GOBP_REGULATION_OF_ANATOMICAL_STRUCTURE_MORPHOGENESIS	1.06102	0.000503384	0.0416206	SEMA3A,DCN,EDN1,FGF10,SULF1,SERPINF1,PTN,VEGFA,CUX2,MEF2C,BMPER,FLT1,JCAD,SPRY4,EFNA5,PHLDB2,CPNE9,SH3D19,NTNG1,FSTL4,PLXND1,RHOH,MAG,ERMN,PTPRD,NTN4,RIMS2,ADAMTS9,GPC6,NKD1
2.MCI/1.YC	Immature	Down	GO BP	GOBP_TONIC_SMOOTH_MUSCLE_CONTRACTION	GOBP_TONIC_SMOOTH_MUSCLE_CONTRACTION	4.67265	0.000504492	0.0416206	EDN1,HTR2A,EDNRA
2.MCI/1.YC	Immature	Down	GO BP	GOBP_REGULATION_OF_DEVELOPMENTAL_GROWTH	GOBP_REGULATION_OF_DEVELOPMENTAL_GROWTH	1.56371	0.000588236	0.0471021	SEMA3A,EDN1,VEGFA,MEF2C,ERBB4,GHR,CPNE9,FSTL4,MAG,RIMS2,MEIS1,ADRB1,NKD1,PI16
2.MCI/1.YC	Immature	Down	GO BP	GOBP_REGULATION_OF_SYSTEM_PROCESS	GOBP_REGULATION_OF_SYSTEM_PROCESS	1.24939	0.000611087	0.0482228	SEMA3A,EDN1,EPAS1,FGF10,THRB,TRPC3,VIP,CUX2,MLIP,HTR2A,MAG,RIMS2,CTNNA3,ADRB1,CALCRL,CHRM2,PI16,CACNG5,CACNG4,TAFA4,GALR1
2.MCI/1.YC	Immature	Down	GO BP	GOBP_POSITIVE_REGULATION_OF_PHOSPHATIDYLINOSITOL_3_KINASE_SIGNALING	GOBP_POSITIVE_REGULATION_OF_PHOSPHATIDYLINOSITOL_3_KINASE_SIGNALING	2.37901	0.000666742	0.0501044	DCN,PDGFRA,PDGFRB,ERBB4,FLT1,PDGFD,PRR5L
2.MCI/1.YC	Immature	Down	GO BP	GOBP_POSITIVE_REGULATION_OF_DEVELOPMENTAL_PROCESS	GOBP_POSITIVE_REGULATION_OF_DEVELOPMENTAL_PROCESS	0.943414	0.000667024	0.0501044	SEMA3A,DCN,EDN1,FGF10,LRP2,LEF1,SERPINF1,PTN,VEGFA,DNMT3B,CUX2,MEF2C,BMPER,ERBB4,FLT1,GHR,HTR2A,JCAD,TPBG,PHLDB2,BRINP3,BRINP2,CPNE9,PLXND1,RHOH,MAG,PTPRD,RIMS2,SOX6,MAN2A1,TOX,TESPA1,ADAMTS20,LRRTM3,VWC2,VWC2L
2.MCI/1.YC	Immature	Down	GO BP	GOBP_SURFACTANT_HOMEOSTASIS	GOBP_SURFACTANT_HOMEOSTASIS	4.48012	0.000685142	0.0501044	EPAS1,VEGFA,ADGRF5
2.MCI/1.YC	Immature	Down	GO BP	GOBP_REGULATION_OF_PHOSPHATASE_ACTIVITY	GOBP_REGULATION_OF_PHOSPHATASE_ACTIVITY	1.88505	0.000691202	0.0501044	PDGFRB,PTN,MEF2C,SH3RF2,RCAN2,RCAN3,SYTL2,PCDH11X,TMEM132D,SH2D4A
2.MCI/1.YC	Immature	Down	GO BP	GOBP_RESPONSE_TO_GROWTH_FACTOR	GOBP_RESPONSE_TO_GROWTH_FACTOR	1.14977	0.000699346	0.0501044	DCN,EDN1,FGF10,SULF1,LRP2,LEF1,PDGFRA,PDGFRB,PTN,VEGFA,NOX4,MEF2C,BMPER,ERBB4,FLT1,DOK5,JCAD,PDGFD,SPRY4,SOX6,NR4A1,NDNF,VWC2,VWC2L
2.MCI/1.YC	Immature	Down	GO BP	GOBP_CALCIUM_DEPENDENT_CELL_CELL_ADHESION_VIA_PLASMA_MEMBRANE_CELL_ADHESION_MOLECULES	GOBP_CALCIUM_DEPENDENT_CELL_CELL_ADHESION_VIA_PLASMA_MEMBRANE_CELL_ADHESION_MOLECULES	2.97865	0.00071244	0.0503797	CDH6,CDH7,CDH12,DCHS1,CDH23
2.MCI/1.YC	Immature	Down	GO BP	GOBP_NEUROTRANSMITTER_TRANSPORT	GOBP_NEUROTRANSMITTER_TRANSPORT	1.76046	0.00075716	0.0528556	MEF2C,HTR2A,RIMS2,SLC29A1,SLC6A11,SLC22A3,KMO,RIMS3,SLC6A1,SLC17A6,SV2C
2.MCI/1.YC	Immature	Down	GO BP	GOBP_CELL_MORPHOGENESIS_INVOLVED_IN_NEURON_DIFFERENTIATION	GOBP_CELL_MORPHOGENESIS_INVOLVED_IN_NEURON_DIFFERENTIATION	1.21415	0.000784293	0.0537608	SEMA3A,PTN,VEGFA,CUX2,MEF2C,DOK5,TPBG,EFNA5,EPHA3,CNTN4,NTNG1,FSTL4,PLXND1,WHRN,CNTN6,RHOH,MAG,DPYSL5,PTPRD,NTN4,CNTN2
2.MCI/1.YC	Immature	Down	GO BP	GOBP_EXTRACELLULAR_MATRIX_ASSEMBLY	GOBP_EXTRACELLULAR_MATRIX_ASSEMBLY	2.94115	0.000792963	0.0537608	PHLDB2,NTNG1,NTN4,MYH11,PXDN
2.MCI/1.YC	Immature	Down	GO BP	GOBP_ADHERENS_JUNCTION_ORGANIZATION	GOBP_ADHERENS_JUNCTION_ORGANIZATION	2.58616	0.000799748	0.0537608	NECTIN3,VEGFA,CDH6,CDH7,CDH12,DCHS1
2.MCI/1.YC	Immature	Down	GO BP	GOBP_MUSCLE_TISSUE_DEVELOPMENT	GOBP_MUSCLE_TISSUE_DEVELOPMENT	1.45155	0.000821315	0.0545373	DCN,EDN1,LRP2,LEF1,PDGFRA,PDGFRB,VEGFA,MEF2C,ERBB4,MEIS1,SOX6,ADAMTS9,PI16,MYH11,SGCZ
2.MCI/1.YC	Immature	Down	GO BP	GOBP_SENSORY_ORGAN_MORPHOGENESIS	GOBP_SENSORY_ORGAN_MORPHOGENESIS	1.65239	0.000837056	0.0549129	EDN1,FGF10,NECTIN3,PTN,THRB,VEGFA,WHRN,MEIS1,GJB6,MAN2A1,NKD1,KCNQ4
2.MCI/1.YC	Immature	Down	GO BP	GOBP_PHOSPHATIDYLINOSITOL_3_KINASE_SIGNALING	GOBP_PHOSPHATIDYLINOSITOL_3_KINASE_SIGNALING	1.95794	0.000893747	0.057934	DCN,EDN1,PDGFRA,PDGFRB,ERBB4,FLT1,HTR2A,PDGFD,PRR5L
2.MCI/1.YC	Immature	Down	GO BP	GOBP_NEURON_RECOGNITION	GOBP_NEURON_RECOGNITION	2.86901	0.000974135	0.0619278	SEMA3A,EPHA3,CNTN4,CNTN6,CNTN2
2.MCI/1.YC	Immature	Down	GO BP	GOBP_REGULATION_OF_SYNAPSE_ASSEMBLY	GOBP_REGULATION_OF_SYNAPSE_ASSEMBLY	2.27555	0.000987937	0.0619278	CUX2,MEF2C,TPBG,PTPRD,GPC6,LRRTM3,IL1RAPL2
2.MCI/1.YC	Immature	Down	GO BP	GOBP_TISSUE_REGENERATION	GOBP_TISSUE_REGENERATION	2.51553	0.00101223	0.0619278	FGF10,PTN,ERBB4,TXK,KLK6,NINJ2
2.MCI/1.YC	Immature	Down	GO BP	GOBP_NEGATIVE_REGULATION_OF_WOUND_HEALING	GOBP_NEGATIVE_REGULATION_OF_WOUND_HEALING	2.51553	0.00101223	0.0619278	EDN1,PDGFRA,PHLDB2,FAP,ADTRP,ADAMTS18
2.MCI/1.YC	Immature	Down	GO BP	GOBP_CELL_CELL_SIGNALING	GOBP_CELL_CELL_SIGNALING	0.82693	0.00108854	0.0653343	ADCYAP1,EDN1,FGF10,SULF1,LEF1,PTN,VIP,CUX2,MEF2C,HTR2A,TPBG,EFNA5,CNTN4,NTNG1,PTPRD,RIMS2,GLRA2,SLC29A1,KMO,RIMS3,ENPEP,GJB6,GPC6,NKD1,SLC16A10,CHRM2,CACNG5,CACNG4,SLC6A1,SLC17A6,PLCB4,PDE7B,TRABD2A,GABRG1,SV2C,GALR1,HCRTR2,GRIK3,GRM8,HTR1F,HTR3B,GRIK1,GRID2IP,PMP22,RNF220
2.MCI/1.YC	Immature	Down	GO BP	GOBP_REGULATION_OF_COAGULATION	GOBP_REGULATION_OF_COAGULATION	2.49273	0.0010919	0.0653343	EDN1,PDGFRA,FAP,ADTRP,ADAMTS18,HS3ST5
2.MCI/1.YC	Immature	Down	GO BP	GOBP_SMOOTH_MUSCLE_CONTRACTION	GOBP_SMOOTH_MUSCLE_CONTRACTION	2.2428	0.00111849	0.0654858	EDN1,SULF1,HTR2A,EDNRA,CALCRL,CHRM2,MYH11
2.MCI/1.YC	Immature	Down	GO BP	GOBP_NEGATIVE_REGULATION_OF_CELLULAR_RESPONSE_TO_GROWTH_FACTOR_STIMULUS	GOBP_NEGATIVE_REGULATION_OF_CELLULAR_RESPONSE_TO_GROWTH_FACTOR_STIMULUS	2.2428	0.00111849	0.0654858	DCN,SULF1,LRP2,BMPER,SPRY4,VWC2,VWC2L
2.MCI/1.YC	Immature	Down	GO BP	GOBP_CELL_PART_MORPHOGENESIS	GOBP_CELL_PART_MORPHOGENESIS	1.11663	0.00113971	0.0660184	SEMA3A,LRP2,PTN,VEGFA,CUX2,DOK5,TPBG,EFNA5,EPHA3,CPNE9,CNTN4,NTNG1,FSTL4,PLXND1,CNTN6,RHOH,MAG,DPYSL5,PTPRD,NTN4,CNTN2,UGT8,RIMS2
2.MCI/1.YC	Immature	Down	GO BP	GOBP_CHEMICAL_HOMEOSTASIS_WITHIN_A_TISSUE	GOBP_CHEMICAL_HOMEOSTASIS_WITHIN_A_TISSUE	4.1589	0.00115857	0.0664046	EPAS1,VEGFA,ADGRF5
2.MCI/1.YC	Immature	Down	GO BP	GOBP_ENSHEATHMENT_OF_NEURONS	GOBP_ENSHEATHMENT_OF_NEURONS	2.04355	0.00118126	0.0669997	CLDN11,PTN,MAG,UGT8,KLK6,PMP22,MOBP,BCAS1
2.MCI/1.YC	Immature	Down	GO BP	GOBP_REGULATION_OF_NEURON_DIFFERENTIATION	GOBP_REGULATION_OF_NEURON_DIFFERENTIATION	1.77375	0.00119913	0.0673122	THRB,DNMT3B,MEF2C,BRINP3,BRINP2,CNTN4,MAG,MEIS1,VWC2,VWC2L
2.MCI/1.YC	Immature	Down	GO BP	GOBP_CARDIOCYTE_DIFFERENTIATION	GOBP_CARDIOCYTE_DIFFERENTIATION	2.03118	0.00124352	0.0690918	EDN1,PDGFRA,PDGFRB,VEGFA,MEF2C,SOX6,PI16,MYH11
2.MCI/1.YC	Immature	Down	GO BP	GOBP_POSITIVE_REGULATION_OF_LIPASE_ACTIVITY	GOBP_POSITIVE_REGULATION_OF_LIPASE_ACTIVITY	2.44817	0.00126561	0.0696087	PDGFRA,PDGFRB,FLT1,HTR2A,EDNRA,TXK
2.MCI/1.YC	Immature	Down	GO BP	GOBP_ANIMAL_ORGAN_MORPHOGENESIS	GOBP_ANIMAL_ORGAN_MORPHOGENESIS	0.975885	0.001326	0.0722005	SEMA3A,DCN,EDN1,FGF10,SULF1,NECTIN3,LRP2,LEF1,PDGFRA,PDGFRB,PTN,THRB,VEGFA,MEF2C,NTNG1,PLXND1,WHRN,NTN4,DCHS1,FMN1,MEIS1,SOX6,COL27A1,FRAS1,GJB6,MAN2A1,GPC6,NKD1,ASXL3,KCNQ4,COL9A1
2.MCI/1.YC	Immature	Down	GO BP	GOBP_ACTIN_FILAMENT_BASED_PROCESS	GOBP_ACTIN_FILAMENT_BASED_PROCESS	1.05237	0.0013643	0.072887	EDN1,FGF10,PDGFRA,PDGFRB,TF,NOX4,EFNA5,EPHA3,PHLDB2,ANLN,SHROOM1,RHOH,ERMN,FMN1,CTNNA3,MTSS1,EPB41L4B,MYBPC1,MYH11,MYO1B,KANK4,SHROOM4,KLHL1,AIF1L,FRMD5
2.MCI/1.YC	Immature	Down	GO BP	GOBP_CELL_CHEMOTAXIS	GOBP_CELL_CHEMOTAXIS	1.49252	0.00136538	0.072887	EDN1,LEF1,PDGFRA,PDGFRB,PTN,VEGFA,FLT1,TPBG,PDGFD,NR4A1,VAV3,DAPK2,TAFA4
2.MCI/1.YC	Immature	Down	GO BP	GOBP_SYNAPSE_ORGANIZATION	GOBP_SYNAPSE_ORGANIZATION	1.3145	0.00144963	0.0735701	PTN,CUX2,MEF2C,ERBB4,TPBG,NTNG1,PLXND1,PTPRD,CNTN2,GPC6,PTPRT,SLC6A1,LRRTM3,IL1RAPL2,PDZRN3,C1QL1
2.MCI/1.YC	Immature	Down	GO BP	GOBP_HISTAMINE_TRANSPORT	GOBP_HISTAMINE_TRANSPORT	4.02155	0.00145645	0.0735701	ADCYAP1,EDN1,SLC22A3
2.MCI/1.YC	Immature	Down	GO BP	GOBP_CARDIAC_CELL_DEVELOPMENT	GOBP_CARDIAC_CELL_DEVELOPMENT	2.40513	0.00145969	0.0735701	EDN1,PDGFRA,PDGFRB,VEGFA,PI16,MYH11
2.MCI/1.YC	Immature	Down	GO BP	GOBP_CIRCULATORY_SYSTEM_PROCESS	GOBP_CIRCULATORY_SYSTEM_PROCESS	1.17198	0.00146667	0.0735701	SEMA3A,EDN1,EPAS1,LRP2,TAC3,THRB,VEGFA,NOX4,HTR2A,SLC29A1,SLC22A3,CTNNA3,EDNRA,ENPEP,ADRB1,CHRM2,SGCZ,CACNG5,CACNG4,SLC6A1,ABCG2
2.MCI/1.YC	Immature	Down	GO BP	GOBP_POSITIVE_REGULATION_OF_SYNAPTIC_TRANSMISSION_GLUTAMATERGIC	GOBP_POSITIVE_REGULATION_OF_SYNAPTIC_TRANSMISSION_GLUTAMATERGIC	3.19964	0.00147275	0.0735701	ADCYAP1,KMO,CACNG5,CACNG4
2.MCI/1.YC	Immature	Down	GO BP	GOBP_BASEMENT_MEMBRANE_ORGANIZATION	GOBP_BASEMENT_MEMBRANE_ORGANIZATION	3.19964	0.00147275	0.0735701	PHLDB2,NTNG1,NTN4,PXDN
2.MCI/1.YC	Immature	Down	GO BP	GOBP_NEGATIVE_REGULATION_OF_DEVELOPMENTAL_GROWTH	GOBP_NEGATIVE_REGULATION_OF_DEVELOPMENTAL_GROWTH	2.16333	0.00150446	0.074471	SEMA3A,FSTL4,MAG,MEIS1,ADRB1,NKD1,PI16
2.MCI/1.YC	Immature	Down	GO BP	GOBP_MORPHOGENESIS_OF_AN_EPITHELIUM	GOBP_MORPHOGENESIS_OF_AN_EPITHELIUM	1.19258	0.00157928	0.0774702	SEMA3A,EDN1,FGF10,SULF1,LRP2,LEF1,VEGFA,MEF2C,PHLDB2,PLXND1,NTN4,DCHS1,FMN1,EDNRA,FRAS1,MTSS1,GPC6,ASTN2,NKD1
2.MCI/1.YC	Immature	Down	GO BP	GOBP_METANEPHROS_MORPHOGENESIS	GOBP_METANEPHROS_MORPHOGENESIS	3.14562	0.00166901	0.0797172	FGF10,PDGFRB,FMN1,FRAS1
2.MCI/1.YC	Immature	Down	GO BP	GOBP_SALIVARY_GLAND_DEVELOPMENT	GOBP_SALIVARY_GLAND_DEVELOPMENT	3.14562	0.00166901	0.0797172	SEMA3A,FGF10,PLXND1,NTN4
2.MCI/1.YC	Immature	Down	GO BP	GOBP_SLEEP	GOBP_SLEEP	3.14562	0.00166901	0.0797172	HTR2A,SLC29A1,ADRB1,PTGDS
2.MCI/1.YC	Immature	Down	GO BP	GOBP_REGULATION_OF_CELL_MORPHOGENESIS	GOBP_REGULATION_OF_CELL_MORPHOGENESIS	1.45131	0.00173382	0.0820924	PTN,VEGFA,CUX2,SPRY4,EFNA5,CPNE9,SH3D19,NTNG1,PLXND1,RHOH,ERMN,PTPRD,RIMS2
2.MCI/1.YC	Immature	Down	GO BP	GOBP_CORONARY_VASCULATURE_MORPHOGENESIS	GOBP_CORONARY_VASCULATURE_MORPHOGENESIS	3.89622	0.00179824	0.0836874	LRP2,PDGFRB,VEGFA
2.MCI/1.YC	Immature	Down	GO BP	GOBP_REGULATION_OF_ENDOTHELIAL_CELL_MIGRATION	GOBP_REGULATION_OF_ENDOTHELIAL_CELL_MIGRATION	1.79109	0.00189957	0.087654	DCN,EDN1,SERPINF1,PTN,VEGFA,MEF2C,BMPER,JCAD,ADAMTS9
2.MCI/1.YC	Immature	Down	GO BP	GOBP_REGULATION_OF_NERVOUS_SYSTEM_PROCESS	GOBP_REGULATION_OF_NERVOUS_SYSTEM_PROCESS	1.9244	0.00192968	0.0882952	EDN1,VIP,CUX2,MAG,RIMS2,CACNG5,CACNG4,TAFA4
2.MCI/1.YC	Immature	Down	GO BP	GOBP_NEGATIVE_REGULATION_OF_CELL_DEVELOPMENT	GOBP_NEGATIVE_REGULATION_OF_CELL_DEVELOPMENT	1.77265	0.00206146	0.093539	SEMA3A,ADCYAP1,PTN,THRB,VEGFA,SPRY4,EFNA5,FSTL4,MAG
2.MCI/1.YC	Immature	Down	GO BP	GOBP_CAMERA_TYPE_EYE_DEVELOPMENT	GOBP_CAMERA_TYPE_EYE_DEVELOPMENT	1.41114	0.00218103	0.0981462	FGF10,NECTIN3,PDGFRA,PDGFRB,SERPINF1,PTN,THRB,VEGFA,FLT1,MEIS1,MAN2A1,NHS,SLC17A6
2.MCI/1.YC	Immature	Down	GO BP	GOBP_POSITIVE_REGULATION_OF_CHEMOTAXIS	GOBP_POSITIVE_REGULATION_OF_CHEMOTAXIS	1.87938	0.00231719	0.102796	EDN1,FGF10,PDGFRB,PTN,VEGFA,TPBG,PDGFD,DAPK2
2.MCI/1.YC	Immature	Down	GO BP	GOBP_POSITIVE_REGULATION_OF_MAPK_CASCADE	GOBP_POSITIVE_REGULATION_OF_MAPK_CASCADE	1.16866	0.00241227	0.103679	SEMA3A,ADCYAP1,EDN1,FGF10,PDGFRA,PDGFRB,VEGFA,TF,SH3RF2,BMPER,ERBB4,FLT1,GHR,HTR2A,DOK5,JCAD,TPBG,PDGFD
2.MCI/1.YC	Immature	Down	GO BP	GOBP_SYNAPSE_ASSEMBLY	GOBP_SYNAPSE_ASSEMBLY	1.73645	0.00241823	0.103679	CUX2,MEF2C,ERBB4,TPBG,PLXND1,PTPRD,GPC6,LRRTM3,IL1RAPL2
2.MCI/1.YC	Immature	Down	GO BP	GOBP_CELL_CELL_JUNCTION_ORGANIZATION	GOBP_CELL_CELL_JUNCTION_ORGANIZATION	1.62494	0.00245391	0.104387	NECTIN3,CLDN11,VEGFA,CDH6,CDH7,CDH12,WHRN,UGT8,DCHS1,GJB6
2.MCI/1.YC	Immature	Down	GO BP	GOBP_NEURON_PROJECTION_GUIDANCE	GOBP_NEURON_PROJECTION_GUIDANCE	1.45206	0.00252149	0.106431	SEMA3A,VEGFA,DOK5,EFNA5,EPHA3,CNTN4,PLXND1,CNTN6,RHOH,DPYSL5,NTN4,CNTN2
2.MCI/1.YC	Immature	Down	GO BP	GOBP_NEURON_CELL_CELL_ADHESION	GOBP_NEURON_CELL_CELL_ADHESION	3.67374	0.00262206	0.106936	CNTN4,ASTN2,NINJ2
2.MCI/1.YC	Immature	Down	GO BP	GOBP_ANATOMICAL_STRUCTURE_REGRESSION	GOBP_ANATOMICAL_STRUCTURE_REGRESSION	3.67374	0.00262206	0.106936	LEF1,FLT1,SLC17A6
2.MCI/1.YC	Immature	Down	GO BP	GOBP_DENDRITE_SELF_AVOIDANCE	GOBP_DENDRITE_SELF_AVOIDANCE	3.67374	0.00262206	0.106936	CNTN4,CNTN6,CNTN2
2.MCI/1.YC	Immature	Down	GO BP	GOBP_ADENYLATE_CYCLASE_INHIBITING_G_PROTEIN_COUPLED_RECEPTOR_SIGNALING_PATHWAY	GOBP_ADENYLATE_CYCLASE_INHIBITING_G_PROTEIN_COUPLED_RECEPTOR_SIGNALING_PATHWAY	2.22498	0.00262667	0.106936	EDN1,EDNRA,CHRM2,GRIK3,GRM8,HTR1F
2.MCI/1.YC	Immature	Down	GO BP	GOBP_REGULATION_OF_DEPHOSPHORYLATION	GOBP_REGULATION_OF_DEPHOSPHORYLATION	1.61012	0.00263166	0.106936	PDGFRB,PTN,MEF2C,SH3RF2,RCAN2,RCAN3,SYTL2,PCDH11X,TMEM132D,SH2D4A
2.MCI/1.YC	Immature	Down	GO BP	GOBP_NEGATIVE_REGULATION_OF_VASCULAR_ENDOTHELIAL_CELL_PROLIFERATION	GOBP_NEGATIVE_REGULATION_OF_VASCULAR_ENDOTHELIAL_CELL_PROLIFERATION	5.30538	0.00267961	0.108077	MEF2C,FLT1
2.MCI/1.YC	Immature	Down	GO BP	GOBP_REGULATION_OF_NEURON_PROJECTION_DEVELOPMENT	GOBP_REGULATION_OF_NEURON_PROJECTION_DEVELOPMENT	1.27009	0.00271299	0.108619	SEMA3A,ADCYAP1,SERPINF1,PTN,VEGFA,CUX2,MYLIP,EPHA3,NTNG1,FSTL4,PLXND1,MAG,PTPRD,NDNF,TOX,KLK6
2.MCI/1.YC	Immature	Down	GO BP	GOBP_CELL_MORPHOGENESIS_INVOLVED_IN_DIFFERENTIATION	GOBP_CELL_MORPHOGENESIS_INVOLVED_IN_DIFFERENTIATION	1.01664	0.00273394	0.108659	SEMA3A,LEF1,PTN,VEGFA,CUX2,MEF2C,DOK5,TPBG,SPRY4,EFNA5,EPHA3,CNTN4,NTNG1,FSTL4,PLXND1,WHRN,CNTN6,RHOH,MAG,DPYSL5,PTPRD,NTN4,CNTN2
2.MCI/1.YC	Immature	Down	GO BP	GOBP_REGULATION_OF_HYDROLASE_ACTIVITY	GOBP_REGULATION_OF_HYDROLASE_ACTIVITY	0.831944	0.00277081	0.109327	ADCYAP1,FGF10,PDGFRA,PDGFRB,SERPINF1,PTN,VEGFA,MEF2C,NDE1,SH3RF2,FLT1,HTR2A,EFNA5,EPHA3,MTCL1,PLXND1,RHOH,EDNRA,ADRB1,VAV3,TXK,PLA2R1,CARD18,PI16,LIPC,RCAN2,RCAN3,CHML,SYTL2,PCDH11X,RGS5,RGS6,ARHGAP29,TMEM132D,SH2D4A
2.MCI/1.YC	Immature	Down	GO BP	GOBP_BODY_FLUID_SECRETION	GOBP_BODY_FLUID_SECRETION	2.18773	0.00296084	0.115155	EDN1,FGF10,VEGFA,VIP,ERBB4,SLC29A1
2.MCI/1.YC	Immature	Down	GO BP	GOBP_NEGATIVE_REGULATION_OF_RESPONSE_TO_WOUNDING	GOBP_NEGATIVE_REGULATION_OF_RESPONSE_TO_WOUNDING	2.18773	0.00296084	0.115155	EDN1,PDGFRA,PHLDB2,FAP,ADTRP,ADAMTS18
2.MCI/1.YC	Immature	Down	GO BP	GOBP_ENDOTHELIAL_CELL_PROLIFERATION	GOBP_ENDOTHELIAL_CELL_PROLIFERATION	1.81409	0.00301012	0.115729	SULF1,VEGFA,VIP,MEF2C,BMPER,FLT1,JCAD,NR4A1
2.MCI/1.YC	Immature	Down	GO BP	GOBP_REGULATION_OF_SYNAPSE_STRUCTURE_OR_ACTIVITY	GOBP_REGULATION_OF_SYNAPSE_STRUCTURE_OR_ACTIVITY	1.58091	0.00301808	0.115729	PTN,CUX2,MEF2C,TPBG,PTPRD,GPC6,PTPRT,SLC17A6,LRRTM3,IL1RAPL2
2.MCI/1.YC	Immature	Down	GO BP	GOBP_RESPONSE_TO_PLATELET_DERIVED_GROWTH_FACTOR	GOBP_RESPONSE_TO_PLATELET_DERIVED_GROWTH_FACTOR	3.57357	0.00310798	0.116828	PDGFRB,PTN,PDGFD
2.MCI/1.YC	Immature	Down	GO BP	GOBP_PEPTIDYL_TYROSINE_MODIFICATION	GOBP_PEPTIDYL_TYROSINE_MODIFICATION	1.29033	0.00313309	0.116828	FGF10,PDGFRA,PDGFRB,VEGFA,NOX4,ERBB4,FLT1,GHR,HTR2A,PDGFD,EFNA5,EPHA3,AFAP1L2,TXK
2.MCI/1.YC	Immature	Down	GO BP	GOBP_ARTERY_DEVELOPMENT	GOBP_ARTERY_DEVELOPMENT	2.16948	0.00313936	0.116828	LRP2,PDGFRB,VEGFA,PLXND1,ADAMTS9,ADGRF5
2.MCI/1.YC	Immature	Down	GO BP	GOBP_CELL_PROJECTION_ORGANIZATION	GOBP_CELL_PROJECTION_ORGANIZATION	0.781672	0.00318076	0.116828	SEMA3A,ADCYAP1,LRP2,SERPINF1,SPATA6,PTN,VEGFA,CUX2,MEF2C,NDE1,DOK5,TPBG,MYLIP,EFNA5,EPHA3,ANLN,CPNE9,CNTN4,NTNG1,FSTL4,PLXND1,WHRN,CNTN6,RHOH,MAG,DPYSL5,ERMN,PTPRD,NTN4,CNTN2,UGT8,RIMS2,MTSS1,NDNF,VAV3,TOX,CDH23,KLK6,KLHL1,AIF1L,PMP22
2.MCI/1.YC	Immature	Down	GO BP	GOBP_REGULATION_OF_MORPHOGENESIS_OF_AN_EPITHELIUM	GOBP_REGULATION_OF_MORPHOGENESIS_OF_AN_EPITHELIUM	2.4438	0.00321305	0.116828	FGF10,SULF1,VEGFA,NTN4,NKD1
2.MCI/1.YC	Immature	Down	GO BP	GOBP_SEROTONIN_RECEPTOR_SIGNALING_PATHWAY	GOBP_SEROTONIN_RECEPTOR_SIGNALING_PATHWAY	2.85503	0.00323986	0.116828	HTR2A,CHRM2,HTR1F,HTR3B
2.MCI/1.YC	Immature	Down	GO BP	GOBP_FEAR_RESPONSE	GOBP_FEAR_RESPONSE	2.85503	0.00323986	0.116828	ADCYAP1,MEF2C,ADRB1,ASIC4
2.MCI/1.YC	Immature	Down	GO BP	GOBP_POSITIVE_REGULATION_OF_LIPID_KINASE_ACTIVITY	GOBP_POSITIVE_REGULATION_OF_LIPID_KINASE_ACTIVITY	2.85503	0.00323986	0.116828	PDGFRA,PDGFRB,FLT1,VAV3
2.MCI/1.YC	Immature	Down	GO BP	GOBP_REGULATION_OF_SPROUTING_ANGIOGENESIS	GOBP_REGULATION_OF_SPROUTING_ANGIOGENESIS	2.85503	0.00323986	0.116828	VEGFA,BMPER,JCAD,ADAMTS9
2.MCI/1.YC	Immature	Down	GO BP	GOBP_REGULATION_OF_CHEMOTAXIS	GOBP_REGULATION_OF_CHEMOTAXIS	1.55938	0.0033366	0.119525	SEMA3A,EDN1,FGF10,PDGFRA,PDGFRB,PTN,VEGFA,TPBG,PDGFD,DAPK2
2.MCI/1.YC	Immature	Down	GO BP	GOBP_ARTERY_MORPHOGENESIS	GOBP_ARTERY_MORPHOGENESIS	2.41782	0.00345316	0.122564	LRP2,PDGFRB,VEGFA,ADAMTS9,ADGRF5
2.MCI/1.YC	Immature	Down	GO BP	GOBP_RESPONSE_TO_ACID_CHEMICAL	GOBP_RESPONSE_TO_ACID_CHEMICAL	1.9352	0.00346645	0.122564	EDN1,PDGFRA,PTN,VEGFA,PDGFD,COL6A1,GLRA2
2.MCI/1.YC	Immature	Down	GO BP	GOBP_ENZYME_LINKED_RECEPTOR_PROTEIN_SIGNALING_PATHWAY	GOBP_ENZYME_LINKED_RECEPTOR_PROTEIN_SIGNALING_PATHWAY	0.89014	0.00350354	0.122874	DCN,FGF10,SULF1,LRP2,LEF1,PDGFRA,PDGFRB,PTN,VEGFA,TF,BMPER,ERBB4,FLT1,GHR,DOK5,JCAD,PDGFD,SPRY4,EFNA5,EPHA3,AFAP1L2,FSTL4,PTPRD,MTSS1,VAV3,PTPRT,STYK1,BTBD11,VWC2,VWC2L
2.MCI/1.YC	Immature	Down	GO BP	GOBP_KIDNEY_MORPHOGENESIS	GOBP_KIDNEY_MORPHOGENESIS	2.1336	0.00352037	0.122874	FGF10,PDGFRB,VEGFA,DCHS1,FMN1,FRAS1
2.MCI/1.YC	Immature	Down	GO BP	GOBP_ORGAN_GROWTH	GOBP_ORGAN_GROWTH	1.77226	0.00355508	0.123176	EDN1,FGF10,PDGFRB,MEF2C,ERBB4,MEIS1,COL27A1,PI16
2.MCI/1.YC	Immature	Down	GO BP	GOBP_MESENCHYMAL_CELL_PROLIFERATION	GOBP_MESENCHYMAL_CELL_PROLIFERATION	2.81203	0.00357424	0.123176	PTN,VEGFA,DCHS1,DCHS2
2.MCI/1.YC	Immature	Down	GO BP	GOBP_POSITIVE_REGULATION_OF_MULTICELLULAR_ORGANISMAL_PROCESS	GOBP_POSITIVE_REGULATION_OF_MULTICELLULAR_ORGANISMAL_PROCESS	0.793088	0.00360473	0.123294	SEMA3A,ADCYAP1,EDN1,EPAS1,FGF10,SULF1,LRP2,LEF1,SERPINF1,PTN,TRPC3,VEGFA,VIP,CUX2,MEF2C,BMPER,ERBB4,FLT1,GHR,HTR2A,JCAD,TPBG,AFAP1L2,PLXND1,RHOH,MAG,PTPRD,RIMS2,SOX6,ADRB1,MAN2A1,TXK,TOX,TESPA1,LRRTM3,GALR1
2.MCI/1.YC	Immature	Down	GO BP	GOBP_AXONAL_FASCICULATION	GOBP_AXONAL_FASCICULATION	3.4806	0.00364562	0.123294	SEMA3A,EPHA3,CNTN4
2.MCI/1.YC	Immature	Down	GO BP	GOBP_MYELIN_ASSEMBLY	GOBP_MYELIN_ASSEMBLY	3.4806	0.00364562	0.123294	UGT8,PMP22,MOBP
2.MCI/1.YC	Immature	Down	GO BP	GOBP_ACTOMYOSIN_STRUCTURE_ORGANIZATION	GOBP_ACTOMYOSIN_STRUCTURE_ORGANIZATION	1.62458	0.00392745	0.131325	EDN1,PDGFRA,PDGFRB,NOX4,PHLDB2,ANLN,EPB41L4B,MYH11,FRMD5
2.MCI/1.YC	Immature	Down	GO BP	GOBP_ACTIVATION_OF_ADENYLATE_CYCLASE_ACTIVITY	GOBP_ACTIVATION_OF_ADENYLATE_CYCLASE_ACTIVITY	2.77029	0.00393131	0.131325	ADCYAP1,EDNRA,ADRB1,RXFP1
2.MCI/1.YC	Immature	Down	GO BP	GOBP_REGULATION_OF_HEART_GROWTH	GOBP_REGULATION_OF_HEART_GROWTH	2.36682	0.00397163	0.131863	EDN1,MEF2C,ERBB4,MEIS1,PI16
2.MCI/1.YC	Immature	Down	GO BP	GOBP_POSITIVE_REGULATION_OF_NEURON_DIFFERENTIATION	GOBP_POSITIVE_REGULATION_OF_NEURON_DIFFERENTIATION	2.08154	0.00415495	0.137113	DNMT3B,MEF2C,BRINP3,BRINP2,VWC2,VWC2L
2.MCI/1.YC	Immature	Down	GO BP	GOBP_AROMATIC_AMINO_ACID_FAMILY_CATABOLIC_PROCESS	GOBP_AROMATIC_AMINO_ACID_FAMILY_CATABOLIC_PROCESS	3.39336	0.00423659	0.138544	PAH,KMO,AADAT
2.MCI/1.YC	Immature	Down	GO BP	GOBP_POSITIVE_REGULATION_OF_NERVOUS_SYSTEM_DEVELOPMENT	GOBP_POSITIVE_REGULATION_OF_NERVOUS_SYSTEM_DEVELOPMENT	1.42371	0.00424919	0.138544	LRP2,SERPINF1,PTN,VEGFA,CUX2,TPBG,PLXND1,MAG,PTPRD,MAN2A1,LRRTM3
2.MCI/1.YC	Immature	Down	GO BP	GOBP_RESPIRATORY_SYSTEM_DEVELOPMENT	GOBP_RESPIRATORY_SYSTEM_DEVELOPMENT	1.59993	0.00436278	0.139833	EPAS1,FGF10,LEF1,PDGFRA,PDGFRB,PTN,THRB,VEGFA,MAN2A1
2.MCI/1.YC	Immature	Down	GO BP	GOBP_SPROUTING_ANGIOGENESIS	GOBP_SPROUTING_ANGIOGENESIS	1.87072	0.00436576	0.139833	LEF1,VEGFA,BMPER,JCAD,NR4A1,ADAMTS9,ADTRP
2.MCI/1.YC	Immature	Down	GO BP	GOBP_REGULATION_OF_PHOSPHATIDYLINOSITOL_3_KINASE_SIGNALING	GOBP_REGULATION_OF_PHOSPHATIDYLINOSITOL_3_KINASE_SIGNALING	1.87072	0.00436576	0.139833	DCN,PDGFRA,PDGFRB,ERBB4,FLT1,PDGFD,PRR5L
2.MCI/1.YC	Immature	Down	GO BP	GOBP_POSITIVE_REGULATION_OF_SIGNALING	GOBP_POSITIVE_REGULATION_OF_SIGNALING	0.729078	0.00451891	0.142228	SEMA3A,ADCYAP1,DCN,EDN1,FGF10,SULF1,LRP2,PDGFRA,PDGFRB,SEPTIN4,PTN,VEGFA,TF,CUX2,SH3RF2,BMPER,ERBB4,FLT1,GHR,HTR2A,DOK5,JCAD,TPBG,PDGFD,AFAP1L2,CNTN6,RIMS2,KMO,RIMS3,PRR5L,NKD1,TXK,TESPA1,PLA2R1,GPR17,CACNG5,CACNG4,KLK6,ADAMTS20,GALR1,LURAP1L,RNF220,GPR137C
2.MCI/1.YC	Immature	Down	GO BP	GOBP_HEART_DEVELOPMENT	GOBP_HEART_DEVELOPMENT	1.10318	0.0047119	0.146744	EDN1,LRP2,PDGFRA,PDGFRB,PTN,VEGFA,MEF2C,ERBB4,PLXND1,DCHS1,MEIS1,SOX6,EDNRA,ADAMTS9,CALCRL,PI16,MYH11,SGCZ
2.MCI/1.YC	Immature	Down	GO BP	GOBP_EXOCRINE_SYSTEM_DEVELOPMENT	GOBP_EXOCRINE_SYSTEM_DEVELOPMENT	2.68996	0.00471629	0.146744	SEMA3A,FGF10,PLXND1,NTN4
2.MCI/1.YC	Immature	Down	GO BP	GOBP_REGULATION_OF_CIRCADIAN_SLEEP_WAKE_CYCLE	GOBP_REGULATION_OF_CIRCADIAN_SLEEP_WAKE_CYCLE	3.31021	0.00488238	0.149351	ADRB1,PTGDS,HCRTR2
2.MCI/1.YC	Immature	Down	GO BP	GOBP_NEUROTRANSMITTER_RECEPTOR_LOCALIZATION_TO_POSTSYNAPTIC_SPECIALIZATION_MEMBRANE	GOBP_NEUROTRANSMITTER_RECEPTOR_LOCALIZATION_TO_POSTSYNAPTIC_SPECIALIZATION_MEMBRANE	3.31021	0.00488238	0.149351	GPC6,CACNG5,CACNG4
2.MCI/1.YC	Immature	Down	GO BP	GOBP_POSITIVE_REGULATION_OF_SPROUTING_ANGIOGENESIS	GOBP_POSITIVE_REGULATION_OF_SPROUTING_ANGIOGENESIS	3.31021	0.00488238	0.149351	VEGFA,BMPER,JCAD
2.MCI/1.YC	Immature	Down	GO BP	GOBP_NEGATIVE_REGULATION_OF_LOCOMOTION	GOBP_NEGATIVE_REGULATION_OF_LOCOMOTION	1.32025	0.00502353	0.152811	SEMA3A,DCN,SULF1,SERPINF1,PTN,MEF2C,ERBB4,PHLDB2,ADAMTS9,ADTRP,PTPRT,FRMD5
2.MCI/1.YC	Immature	Down	GO BP	GOBP_CORONARY_VASCULATURE_DEVELOPMENT	GOBP_CORONARY_VASCULATURE_DEVELOPMENT	2.65141	0.00514557	0.154724	LRP2,PDGFRB,VEGFA,PLXND1
2.MCI/1.YC	Immature	Down	GO BP	GOBP_BEHAVIOR	GOBP_BEHAVIOR	1.08012	0.00516249	0.154724	ADCYAP1,SERPINF1,PTN,THRB,VIP,CUX2,MEF2C,HTR2A,TPBG,MEIS1,ADRB1,PTGDS,CDH23,SLC6A1,ASIC4,HCRTR2,KLHL1,C1QL1
2.MCI/1.YC	Immature	Down	GO BP	GOBP_CELLULAR_RESPONSE_TO_ACID_CHEMICAL	GOBP_CELLULAR_RESPONSE_TO_ACID_CHEMICAL	2.27038	0.00517166	0.154724	PDGFRA,VEGFA,PDGFD,COL6A1,GLRA2
2.MCI/1.YC	Immature	Down	GO BP	GOBP_POSITIVE_REGULATION_OF_CELL_JUNCTION_ASSEMBLY	GOBP_POSITIVE_REGULATION_OF_CELL_JUNCTION_ASSEMBLY	1.99868	0.00539511	0.160086	VEGFA,CUX2,TPBG,PTPRD,FMN1,LRRTM3
2.MCI/1.YC	Immature	Down	GO BP	GOBP_EYE_PHOTORECEPTOR_CELL_DIFFERENTIATION	GOBP_EYE_PHOTORECEPTOR_CELL_DIFFERENTIATION	2.61386	0.00560025	0.163943	PTN,THRB,VEGFA,NKD1
2.MCI/1.YC	Immature	Down	GO BP	GOBP_RESPONSE_TO_WOUNDING	GOBP_RESPONSE_TO_WOUNDING	1.01964	0.00574239	0.167205	DCN,EDN1,FGF10,PDGFRA,PDGFRB,PTN,TRPC3,VEGFA,PHLDB2,FAP,MAG,EPB41L4B,ADTRP,NDNF,VAV3,ADAMTS18,TXK,MMRN1,KLK6,DOCK6
2.MCI/1.YC	Immature	Down	GO BP	GOBP_ORGANIC_ANION_TRANSPORT	GOBP_ORGANIC_ANION_TRANSPORT	1.24861	0.00577682	0.167313	EDN1,LRP2,SLC6A11,SLC22A3,KMO,PLA2R1,SLC6A1,ABCG2,SLC17A6,SLC35D2,SLC22A24,CA13,CA1,SLC22A10
2.MCI/1.YC	Immature	Down	GO BP	GOBP_REGULATION_OF_CELL_SUBSTRATE_JUNCTION_ORGANIZATION	GOBP_REGULATION_OF_CELL_SUBSTRATE_JUNCTION_ORGANIZATION	2.22454	0.00585895	0.168793	VEGFA,EFNA5,EPHA3,PHLDB2,FMN1
2.MCI/1.YC	Immature	Down	GO BP	GOBP_POSITIVE_REGULATION_OF_ERK1_AND_ERK2_CASCADE	GOBP_POSITIVE_REGULATION_OF_ERK1_AND_ERK2_CASCADE	1.52837	0.0058976	0.169013	ADCYAP1,FGF10,PDGFRA,PDGFRB,BMPER,ERBB4,HTR2A,TPBG,PDGFD
2.MCI/1.YC	Immature	Down	GO BP	GOBP_REGULATION_OF_CELL_DIFFERENTIATION	GOBP_REGULATION_OF_CELL_DIFFERENTIATION	0.714285	0.00621551	0.175665	SEMA3A,ADCYAP1,EDN1,FGF10,LRP2,LEF1,PDGFRA,SERPINF1,PTN,THRB,VEGFA,DNMT3B,CUX2,MEF2C,HTR2A,SPRY4,EFNA5,EPHA3,PHLDB2,BRINP3,BRINP2,CNTN4,FSTL4,PLXND1,RHOH,MAG,PTPRD,MEIS1,SOX6,SMOC1,MAN2A1,TOX,TESPA1,TRIB2,PI16,KLK6,ADAMTS20,VWC2,VWC2L
2.MCI/1.YC	Immature	Down	GO BP	GOBP_NEGATIVE_REGULATION_OF_EPITHELIAL_CELL_MIGRATION	GOBP_NEGATIVE_REGULATION_OF_EPITHELIAL_CELL_MIGRATION	2.20203	0.00622564	0.175665	SEMA3A,DCN,SERPINF1,MEF2C,ADAMTS9
2.MCI/1.YC	Immature	Down	GO BP	GOBP_BLOOD_VESSEL_ENDOTHELIAL_CELL_PROLIFERATION_INVOLVED_IN_SPROUTING_ANGIOGENESIS	GOBP_BLOOD_VESSEL_ENDOTHELIAL_CELL_PROLIFERATION_INVOLVED_IN_SPROUTING_ANGIOGENESIS	3.15831	0.00634379	0.177138	VEGFA,BMPER,JCAD
2.MCI/1.YC	Immature	Down	GO BP	GOBP_VASCULAR_ASSOCIATED_SMOOTH_MUSCLE_CONTRACTION	GOBP_VASCULAR_ASSOCIATED_SMOOTH_MUSCLE_CONTRACTION	3.15831	0.00634379	0.177138	EDN1,HTR2A,EDNRA
2.MCI/1.YC	Immature	Down	GO BP	GOBP_POSITIVE_REGULATION_OF_FIBROBLAST_PROLIFERATION	GOBP_POSITIVE_REGULATION_OF_FIBROBLAST_PROLIFERATION	2.54156	0.00658838	0.182647	FGF10,PDGFRA,PDGFRB,PDGFD
2.MCI/1.YC	Immature	Down	GO BP	GOBP_DIENCEPHALON_DEVELOPMENT	GOBP_DIENCEPHALON_DEVELOPMENT	2.17988	0.00660817	0.182647	SEMA3A,ADCYAP1,FGF10,PTN,NDNF
2.MCI/1.YC	Immature	Down	GO BP	GOBP_PHOSPHOLIPASE_C_ACTIVATING_G_PROTEIN_COUPLED_RECEPTOR_SIGNALING_PATHWAY	GOBP_PHOSPHOLIPASE_C_ACTIVATING_G_PROTEIN_COUPLED_RECEPTOR_SIGNALING_PATHWAY	1.9203	0.00688676	0.189174	EDN1,VIP,HTR2A,GPR17,CHRM2,HCRTR2
2.MCI/1.YC	Immature	Down	GO BP	GOBP_EAR_DEVELOPMENT	GOBP_EAR_DEVELOPMENT	1.49006	0.00691379	0.189174	EDN1,FGF10,PDGFRB,BMPER,WHRN,DCHS1,GJB6,CDH23,KCNQ4
2.MCI/1.YC	Immature	Down	GO BP	GOBP_WOUND_HEALING	GOBP_WOUND_HEALING	1.07449	0.00697471	0.189886	DCN,EDN1,FGF10,PDGFRA,PDGFRB,TRPC3,VEGFA,PHLDB2,FAP,EPB41L4B,ADTRP,NDNF,VAV3,ADAMTS18,TXK,MMRN1,DOCK6
2.MCI/1.YC	Immature	Down	GO BP	GOBP_TRANSMEMBRANE_TRANSPORT	GOBP_TRANSMEMBRANE_TRANSPORT	0.698005	0.00703126	0.190474	EDN1,LRP2,OCA2,TRPC3,TMEM165,MEF2C,HTR2A,KCNH5,CLTCL1,GLRA2,SLC29A1,SLC6A11,SLC22A3,EDNRA,GJB6,TMC6,SLC16A10,CACNG5,CACNG4,SLC6A1,ABCG2,SLC17A6,SLC35D2,OPN3,TRPM6,ABCA8,SLC22A24,SLC5A11,SLC25A48,ASIC4,PIEZO2,KCNH7,KCNQ4,GABRG1,SV2C,GRIK3,HTR3B,GRIK1,TMEM144,SLC22A10
2.MCI/1.YC	Immature	Down	GO BP	GOBP_MESENCHYME_DEVELOPMENT	GOBP_MESENCHYME_DEVELOPMENT	1.3156	0.00713862	0.191157	SEMA3A,EDN1,FGF10,LEF1,PDGFRB,MEF2C,ERBB4,EPHA3,PHLDB2,DCHS1,EDNRA
2.MCI/1.YC	Immature	Down	GO BP	GOBP_VASCULAR_PROCESS_IN_CIRCULATORY_SYSTEM	GOBP_VASCULAR_PROCESS_IN_CIRCULATORY_SYSTEM	1.3911	0.0071551	0.191157	EDN1,LRP2,VEGFA,HTR2A,SLC29A1,SLC22A3,EDNRA,ADRB1,SLC6A1,ABCG2
2.MCI/1.YC	Immature	Down	GO BP	GOBP_MELANOCYTE_DIFFERENTIATION	GOBP_MELANOCYTE_DIFFERENTIATION	3.08805	0.00716181	0.191157	OCA2,MEF2C,ADAMTS20
2.MCI/1.YC	Immature	Down	GO BP	GOBP_HEART_PROCESS	GOBP_HEART_PROCESS	1.3047	0.00751525	0.198643	SEMA3A,EDN1,EPAS1,THRB,NOX4,CTNNA3,ADRB1,CHRM2,SGCZ,CACNG5,CACNG4
2.MCI/1.YC	Immature	Down	GO BP	GOBP_RENAL_SYSTEM_VASCULATURE_DEVELOPMENT	GOBP_RENAL_SYSTEM_VASCULATURE_DEVELOPMENT	3.0209	0.00803945	0.208452	PDGFRA,PDGFRB,PDGFD
2.MCI/1.YC	Immature	Down	GO BP	GOBP_SYNAPTIC_MEMBRANE_ADHESION	GOBP_SYNAPTIC_MEMBRANE_ADHESION	3.0209	0.00803945	0.208452	NTNG1,PTPRD,GPC6
2.MCI/1.YC	Immature	Down	GO BP	GOBP_REGULATION_OF_MORPHOGENESIS_OF_A_BRANCHING_STRUCTURE	GOBP_REGULATION_OF_MORPHOGENESIS_OF_A_BRANCHING_STRUCTURE	2.43945	0.00827666	0.212577	FGF10,SULF1,VEGFA,NTN4
2.MCI/1.YC	Immature	Down	GO BP	GOBP_REGULATION_OF_NEUROTRANSMITTER_LEVELS	GOBP_REGULATION_OF_NEUROTRANSMITTER_LEVELS	1.43798	0.00855578	0.218715	MEF2C,HTR2A,RIMS2,SLC29A1,SLC6A11,SLC22A3,PAH,KMO,RIMS3
2.MCI/1.YC	Immature	Down	GO BP	GOBP_NEGATIVE_REGULATION_OF_MULTICELLULAR_ORGANISMAL_PROCESS	GOBP_NEGATIVE_REGULATION_OF_MULTICELLULAR_ORGANISMAL_PROCESS	0.83472	0.00860972	0.219065	SEMA3A,ADCYAP1,DCN,EDN1,SULF1,GPR149,LEF1,PDGFRA,SERPINF1,PTN,MEF2C,MLIP,MYLIP,FAP,FSTL4,MAG,MEIS1,SOX6,ADRB1,ADAMTS9,ADTRP,ADAMTS18,TRIB2,CARD18,CALCRL,PI16,HS3ST5
2.MCI/1.YC	Immature	Down	GO BP	GOBP_CELL_SUBSTRATE_ADHESION	GOBP_CELL_SUBSTRATE_ADHESION	1.22094	0.00876804	0.222056	PTN,VEGFA,SPRY4,EFNA5,EPHA3,PHLDB2,NTNG1,NTN4,FMN1,ITGA11,ADAMTS9,NDNF,VWC2
2.MCI/1.YC	Immature	Down	GO BP	GOBP_NEGATIVE_REGULATION_OF_BMP_SIGNALING_PATHWAY	GOBP_NEGATIVE_REGULATION_OF_BMP_SIGNALING_PATHWAY	2.40712	0.0088967	0.223212	LRP2,BMPER,VWC2,VWC2L
2.MCI/1.YC	Immature	Down	GO BP	GOBP_PRESYNAPSE_ORGANIZATION	GOBP_PRESYNAPSE_ORGANIZATION	2.40712	0.0088967	0.223212	PTPRD,GPC6,LRRTM3,IL1RAPL2
2.MCI/1.YC	Immature	Down	GO BP	GOBP_CIRCADIAN_SLEEP_WAKE_CYCLE	GOBP_CIRCADIAN_SLEEP_WAKE_CYCLE	2.95678	0.00897766	0.223212	ADRB1,PTGDS,HCRTR2
2.MCI/1.YC	Immature	Down	GO BP	GOBP_REGULATION_OF_AMPA_RECEPTOR_ACTIVITY	GOBP_REGULATION_OF_AMPA_RECEPTOR_ACTIVITY	2.95678	0.00897766	0.223212	MEF2C,CACNG5,CACNG4
2.MCI/1.YC	Immature	Down	GO BP	GOBP_CENTRAL_NERVOUS_SYSTEM_DEVELOPMENT	GOBP_CENTRAL_NERVOUS_SYSTEM_DEVELOPMENT	0.818396	0.0090628	0.223597	SEMA3A,ADCYAP1,FGF10,LRP2,LEF1,PTN,NDE1,ERBB4,CNTN4,WHRN,CNTN6,MAG,UGT8,HAPLN1,MEIS1,SOX6,SLC6A11,NDNF,TOX,PLXDC1,GPR17,KLK6,SHROOM4,KLHL1,GRIK1,MOBP,IL1RAPL2
2.MCI/1.YC	Immature	Down	GO BP	GOBP_REGULATION_OF_CELL_SUBSTRATE_ADHESION	GOBP_REGULATION_OF_CELL_SUBSTRATE_ADHESION	1.42345	0.00907528	0.223597	PTN,VEGFA,SPRY4,EFNA5,EPHA3,PHLDB2,FMN1,NDNF,VWC2
2.MCI/1.YC	Immature	Down	GO BP	GOBP_REGULATION_OF_CARDIAC_MUSCLE_ADAPTATION	GOBP_REGULATION_OF_CARDIAC_MUSCLE_ADAPTATION	4.0836	0.00923024	0.224182	TRPC3,MLIP
2.MCI/1.YC	Immature	Down	GO BP	GOBP_SMOOTH_MUSCLE_CELL_CHEMOTAXIS	GOBP_SMOOTH_MUSCLE_CELL_CHEMOTAXIS	4.0836	0.00923024	0.224182	PDGFRB,PDGFD
2.MCI/1.YC	Immature	Down	GO BP	GOBP_POSITIVE_REGULATION_OF_BLOOD_VESSEL_ENDOTHELIAL_CELL_PROLIFERATION_INVOLVED_IN_SPROUTING_ANGIOGENESIS	GOBP_POSITIVE_REGULATION_OF_BLOOD_VESSEL_ENDOTHELIAL_CELL_PROLIFERATION_INVOLVED_IN_SPROUTING_ANGIOGENESIS	4.0836	0.00923024	0.224182	VEGFA,JCAD
2.MCI/1.YC	Immature	Down	GO BP	GOBP_REPRODUCTIVE_SYSTEM_DEVELOPMENT	GOBP_REPRODUCTIVE_SYSTEM_DEVELOPMENT	1.11844	0.00926373	0.224182	SEMA3A,ADCYAP1,DCN,EPAS1,FGF10,SULF1,GPR149,LRP2,LEF1,PDGFRA,PDGFRB,SERPINF1,PTN,VEGFA
2.MCI/1.YC	Immature	Down	GO BP	GOBP_POSITIVE_REGULATION_OF_LIPID_LOCALIZATION	GOBP_POSITIVE_REGULATION_OF_LIPID_LOCALIZATION	1.81703	0.00944848	0.226714	EDN1,KMO,PLA2R1,ABCA8,GALR1,PLIN3
2.MCI/1.YC	Immature	Down	GO BP	GOBP_BRANCHING_MORPHOGENESIS_OF_AN_EPITHELIAL_TUBE	GOBP_BRANCHING_MORPHOGENESIS_OF_AN_EPITHELIAL_TUBE	1.64832	0.00945162	0.226714	EDN1,FGF10,LEF1,VEGFA,PLXND1,DCHS1,EDNRA
2.MCI/1.YC	Immature	Down	GO BP	GOBP_POSITIVE_REGULATION_OF_NEUROGENESIS	GOBP_POSITIVE_REGULATION_OF_NEUROGENESIS	1.40907	0.00961835	0.229701	LRP2,SERPINF1,PTN,VEGFA,CUX2,PLXND1,MAG,PTPRD,MAN2A1
2.MCI/1.YC	Immature	Down	GO BP	GOBP_NEGATIVE_REGULATION_OF_DEPHOSPHORYLATION	GOBP_NEGATIVE_REGULATION_OF_DEPHOSPHORYLATION	1.80291	0.00986318	0.232489	PTN,SH3RF2,SYTL2,PCDH11X,TMEM132D,SH2D4A
2.MCI/1.YC	Immature	Down	GO BP	GOBP_GLAND_DEVELOPMENT	GOBP_GLAND_DEVELOPMENT	1.09964	0.010061	0.234938	SEMA3A,ADCYAP1,FGF10,SULF1,LEF1,PDGFRA,SERPINF1,PTN,VEGFA,ERBB4,PLXND1,NTN4,SLC29A1,MAN2A1
2.MCI/1.YC	Immature	Down	GO BP	GOBP_MUSCLE_CELL_PROLIFERATION	GOBP_MUSCLE_CELL_PROLIFERATION	1.49985	0.0101078	0.234938	EDN1,PDGFRB,VIP,MEF2C,ERBB4,PDGFD,MEIS1,CALCRL
2.MCI/1.YC	Immature	Down	GO BP	GOBP_EYE_MORPHOGENESIS	GOBP_EYE_MORPHOGENESIS	1.62676	0.0101669	0.234938	NECTIN3,PTN,THRB,VEGFA,MEIS1,MAN2A1,NKD1
2.MCI/1.YC	Immature	Down	GO BP	GOBP_POSITIVE_REGULATION_OF_SYNAPTIC_TRANSMISSION	GOBP_POSITIVE_REGULATION_OF_SYNAPTIC_TRANSMISSION	1.62676	0.0101669	0.234938	ADCYAP1,PTN,RIMS2,KMO,RIMS3,CACNG5,CACNG4
2.MCI/1.YC	Immature	Down	GO BP	GOBP_AORTA_DEVELOPMENT	GOBP_AORTA_DEVELOPMENT	2.34399	0.010226	0.234938	LRP2,PDGFRB,PLXND1,ADAMTS9
2.MCI/1.YC	Immature	Down	GO BP	GOBP_TISSUE_MORPHOGENESIS	GOBP_TISSUE_MORPHOGENESIS	0.937538	0.0102817	0.235226	SEMA3A,EDN1,FGF10,SULF1,LRP2,LEF1,VEGFA,MEF2C,PHLDB2,PLXND1,NTN4,DCHS1,FMN1,EDNRA,FRAS1,MTSS1,GPC6,ASTN2,NKD1
2.MCI/1.YC	Immature	Down	GO BP	GOBP_TRANSMEMBRANE_RECEPTOR_PROTEIN_TYROSINE_KINASE_SIGNALING_PATHWAY	GOBP_TRANSMEMBRANE_RECEPTOR_PROTEIN_TYROSINE_KINASE_SIGNALING_PATHWAY	0.893572	0.0104049	0.237048	DCN,FGF10,SULF1,PDGFRA,PDGFRB,VEGFA,ERBB4,FLT1,GHR,DOK5,JCAD,PDGFD,SPRY4,EFNA5,EPHA3,AFAP1L2,FSTL4,MTSS1,VAV3,PTPRT,STYK1
2.MCI/1.YC	Immature	Down	GO BP	GOBP_POSITIVE_REGULATION_OF_CELL_DIFFERENTIATION	GOBP_POSITIVE_REGULATION_OF_CELL_DIFFERENTIATION	0.853052	0.0105055	0.237991	EDN1,LRP2,LEF1,SERPINF1,PTN,VEGFA,DNMT3B,CUX2,MEF2C,HTR2A,BRINP3,BRINP2,PLXND1,RHOH,MAG,PTPRD,SOX6,MAN2A1,TOX,TESPA1,ADAMTS20,VWC2,VWC2L
2.MCI/1.YC	Immature	Down	GO BP	GOBP_CELL_CELL_JUNCTION_ASSEMBLY	GOBP_CELL_CELL_JUNCTION_ASSEMBLY	1.61611	0.010539	0.237991	CLDN11,CDH6,CDH7,CDH12,UGT8,DCHS1,GJB6
2.MCI/1.YC	Immature	Down	GO BP	GOBP_REGULATION_OF_NERVOUS_SYSTEM_DEVELOPMENT	GOBP_REGULATION_OF_NERVOUS_SYSTEM_DEVELOPMENT	1.08843	0.0105774	0.237991	SEMA3A,ADCYAP1,LRP2,SERPINF1,PTN,VEGFA,CUX2,TPBG,FSTL4,PLXND1,MAG,PTPRD,MAN2A1,LRRTM3
2.MCI/1.YC	Immature	Down	GO BP	GOBP_GLAND_MORPHOGENESIS	GOBP_GLAND_MORPHOGENESIS	1.77498	0.0107312	0.239472	SEMA3A,FGF10,SULF1,PTN,PLXND1,NTN4
2.MCI/1.YC	Immature	Down	GO BP	GOBP_FEMALE_SEX_DIFFERENTIATION	GOBP_FEMALE_SEX_DIFFERENTIATION	1.77498	0.0107312	0.239472	ADCYAP1,FGF10,GPR149,LRP2,PDGFRA,VEGFA
2.MCI/1.YC	Immature	Down	GO BP	GOBP_NEURON_MIGRATION	GOBP_NEURON_MIGRATION	1.60553	0.0109209	0.239776	SEMA3A,VEGFA,MEF2C,ERBB4,NTNG1,ASTN2,NDNF
2.MCI/1.YC	Immature	Down	GO BP	GOBP_CARBOHYDRATE_TRANSPORT	GOBP_CARBOHYDRATE_TRANSPORT	1.60553	0.0109209	0.239776	EDN1,CLTCL1,EDNRA,SLC35D2,OPN3,SLC5A11,TMEM144
2.MCI/1.YC	Immature	Down	GO BP	GOBP_RETINA_DEVELOPMENT_IN_CAMERA_TYPE_EYE	GOBP_RETINA_DEVELOPMENT_IN_CAMERA_TYPE_EYE	1.60553	0.0109209	0.239776	NECTIN3,PDGFRA,PDGFRB,SERPINF1,PTN,THRB,MAN2A1
2.MCI/1.YC	Immature	Down	GO BP	GOBP_CARBOHYDRATE_TRANSMEMBRANE_TRANSPORT	GOBP_CARBOHYDRATE_TRANSMEMBRANE_TRANSPORT	1.76122	0.0111849	0.243673	EDN1,CLTCL1,EDNRA,OPN3,SLC5A11,TMEM144
2.MCI/1.YC	Immature	Down	GO BP	GOBP_REGULATION_OF_NEURAL_PRECURSOR_CELL_PROLIFERATION	GOBP_REGULATION_OF_NEURAL_PRECURSOR_CELL_PROLIFERATION	1.97549	0.0113775	0.243673	ADCYAP1,LRP2,PTN,VEGFA,TOX
2.MCI/1.YC	Immature	Down	GO BP	GOBP_TRYPTOPHAN_CATABOLIC_PROCESS	GOBP_TRYPTOPHAN_CATABOLIC_PROCESS	3.8913	0.0114117	0.243673	KMO,AADAT
2.MCI/1.YC	Immature	Down	GO BP	GOBP_BLEB_ASSEMBLY	GOBP_BLEB_ASSEMBLY	3.8913	0.0114117	0.243673	ANLN,PMP22
2.MCI/1.YC	Immature	Down	GO BP	GOBP_PROSTATIC_BUD_FORMATION	GOBP_PROSTATIC_BUD_FORMATION	3.8913	0.0114117	0.243673	FGF10,SULF1
2.MCI/1.YC	Immature	Down	GO BP	GOBP_POSITIVE_REGULATION_OF_PHOSPHOLIPID_BIOSYNTHETIC_PROCESS	GOBP_POSITIVE_REGULATION_OF_PHOSPHOLIPID_BIOSYNTHETIC_PROCESS	3.8913	0.0114117	0.243673	HTR2A,ADGRF5
2.MCI/1.YC	Immature	Down	GO BP	GOBP_GLOMERULAR_MESANGIAL_CELL_PROLIFERATION	GOBP_GLOMERULAR_MESANGIAL_CELL_PROLIFERATION	3.8913	0.0114117	0.243673	PDGFRB,PDGFD
2.MCI/1.YC	Immature	Down	GO BP	GOBP_CELL_MIGRATION_INVOLVED_IN_SPROUTING_ANGIOGENESIS	GOBP_CELL_MIGRATION_INVOLVED_IN_SPROUTING_ANGIOGENESIS	2.28376	0.0116775	0.247217	VEGFA,JCAD,NR4A1,ADTRP
3.AD/1.YC	Immature	Up	GO BP	GOBP_SYNAPTIC_SIGNALING	GOBP_SYNAPTIC_SIGNALING	2.04647	2.79848e-09	1.52377e-05	PTK2B,SHISA6,ADRA1A,GRM1,CDH8,PPFIA2,RAB3B,NAAA,PCLO,UNC13C,CACNB2,MCTP1,OTOF,CHRNA1,SLC8A2,CALB1,DGKB,IL1RAP,P2RX2,NPY2R,CACNA1E,CNIH3,GRIA1,SYT10,SHISA9,GABRQ,CLSTN2,HTR4,NPTXR
3.AD/1.YC	Immature	Up	GO BP	GOBP_CATION_TRANSPORT	GOBP_CATION_TRANSPORT	1.73258	8.13603e-09	2.21503e-05	PTK2B,SHISA6,NOX5,ATP6V1H,ADRA1A,LRRC7,SLC24A3,RAB3B,MAOB,CACNB2,CHRNA1,KCNJ3,SLC8A2,PLCG2,MT-ND4,CNGB1,OPRD1,P2RX2,NKAIN3,SLC4A7,NPY2R,CACNA1E,KCNK1,SLC47A1,MT-ATP6,MT-ATP8,MT-CYB,DAPK1,TMC2,CNIH3,SLC9C2,GRIA1,SYT10,KCNJ6,MCOLN3,JPH1,SHISA9
3.AD/1.YC	Immature	Up	GO BP	GOBP_CATION_TRANSMEMBRANE_TRANSPORT	GOBP_CATION_TRANSMEMBRANE_TRANSPORT	1.71833	2.63908e-07	0.000400573	PTK2B,SHISA6,NOX5,ATP6V1H,LRRC7,SLC24A3,CACNB2,KCNJ3,SLC8A2,PLCG2,MT-ND4,CNGB1,P2RX2,SLC4A7,CACNA1E,KCNK1,SLC47A1,MT-ATP6,MT-ATP8,MT-CYB,DAPK1,TMC2,CNIH3,SLC9C2,GRIA1,KCNJ6,MCOLN3,JPH1,SHISA9
3.AD/1.YC	Immature	Up	GO BP	GOBP_SYNAPSE_ORGANIZATION	GOBP_SYNAPSE_ORGANIZATION	2.17184	2.94268e-07	0.000400573	SHISA6,EPHA7,TIAM1,CDH8,FLRT3,PPFIA2,NRP2,PCLO,UNC13C,CACNB2,CHRNA1,SLC8A2,DGKB,IL1RAP,P2RX2,SDK1,CLSTN2,CNKSR2,C1QL3
3.AD/1.YC	Immature	Up	GO BP	GOBP_REGULATION_OF_NEUROTRANSMITTER_RECEPTOR_ACTIVITY	GOBP_REGULATION_OF_NEUROTRANSMITTER_RECEPTOR_ACTIVITY	3.47756	3.94636e-07	0.000429758	PTK2B,SHISA6,LRRC7,DAPK1,CNIH3,GRIA1,SHISA9,NPTXR,LYPD6B
3.AD/1.YC	Immature	Up	GO BP	GOBP_CARDIAC_SEPTUM_MORPHOGENESIS	GOBP_CARDIAC_SEPTUM_MORPHOGENESIS	3.68994	6.27674e-07	0.000569614	ZFPM2,SLIT3,ACVR1,PROX1,NRP1,SEMA3C,NRP2,JAG1
3.AD/1.YC	Immature	Up	GO BP	GOBP_NEGATIVE_CHEMOTAXIS	GOBP_NEGATIVE_CHEMOTAXIS	3.98675	9.14236e-07	0.000711145	SLIT3,EPHA7,SEMA3C,FLRT3,NRP2,SEMA5A,PLXNA4
3.AD/1.YC	Immature	Up	GO BP	GOBP_CARDIAC_SEPTUM_DEVELOPMENT	GOBP_CARDIAC_SEPTUM_DEVELOPMENT	3.22009	1.54637e-06	0.000886711	ZFPM2,SLIT3,ACVR1,PROX1,NRP1,SEMA3C,NRP2,JAG1,ADAMTS6
3.AD/1.YC	Immature	Up	GO BP	GOBP_REGULATION_OF_SIGNALING_RECEPTOR_ACTIVITY	GOBP_REGULATION_OF_SIGNALING_RECEPTOR_ACTIVITY	2.65191	1.5836e-06	0.000886711	PTK2B,SHISA6,PPARG,LRRC7,NRP1,DAPK1,CNIH3,GRIA1,SHISA9,MTRNR2L12,NPTXR,LYPD6B
3.AD/1.YC	Immature	Up	GO BP	GOBP_CELL_JUNCTION_ORGANIZATION	GOBP_CELL_JUNCTION_ORGANIZATION	1.74751	1.62849e-06	0.000886711	PTK2B,SHISA6,EPHA7,TIAM1,NRP1,PARD3,CDH8,FLRT3,PTPRO,PPFIA2,NRP2,PCLO,UNC13C,CACNB2,CHRNA1,SLC8A2,DGKB,IL1RAP,ARHGAP6,P2RX2,SDK1,CLSTN2,CNKSR2,C1QL3
3.AD/1.YC	Immature	Up	GO BP	GOBP_CELL_CELL_SIGNALING	GOBP_CELL_CELL_SIGNALING	1.31355	2.42147e-06	0.00119863	PTK2B,SHISA6,PCSK5,ADRA1A,GRM1,TIAM1,NRP1,CDH8,PTPRO,PPFIA2,SEMA5A,CCN4,RAB3B,NAAA,PCLO,MAOB,UNC13C,CACNB2,MCTP1,OTOF,CHRNA1,KCNJ3,SLC8A2,RFX3,CALB1,BICC1,PLCG2,MLLT3,DGKB,IL1RAP,P2RX2,NPY2R,CACNA1E,CNIH3,GRIA1,SYT10,SHISA9,GABRQ,CLSTN2,HTR4,NPTXR
3.AD/1.YC	Immature	Up	GO BP	GOBP_NEURON_PROJECTION_EXTENSION_INVOLVED_IN_NEURON_PROJECTION_GUIDANCE	GOBP_NEURON_PROJECTION_EXTENSION_INVOLVED_IN_NEURON_PROJECTION_GUIDANCE	4.08827	3.84527e-06	0.00174479	SLIT3,NRP1,SEMA3C,NRP2,SEMA5A,PLXNA4
3.AD/1.YC	Immature	Up	GO BP	GOBP_REGULATION_OF_POSTSYNAPTIC_CYTOSOLIC_CALCIUM_ION_CONCENTRATION	GOBP_REGULATION_OF_POSTSYNAPTIC_CYTOSOLIC_CALCIUM_ION_CONCENTRATION	5.63527	5.39759e-06	0.00226076	GRM1,SLC8A2,CALB1,GRIA1
3.AD/1.YC	Immature	Up	GO BP	GOBP_CARDIAC_CHAMBER_MORPHOGENESIS	GOBP_CARDIAC_CHAMBER_MORPHOGENESIS	2.93088	7.06319e-06	0.00274708	ZFPM2,SLIT3,ACVR1,PROX1,NRP1,SEMA3C,NRP2,JAG1,NPY2R
3.AD/1.YC	Immature	Up	GO BP	GOBP_CELLULAR_HOMEOSTASIS	GOBP_CELLULAR_HOMEOSTASIS	1.50274	8.15358e-06	0.00295975	PTK2B,PTGFR,NOX5,STC2,ATP6V1H,ZBTB20,CD36,ADRA1A,GRM1,TIAM1,POLE,RFC3,SLC24A3,CACNB2,CHRNA1,SLC8A2,CALB1,PLCG2,CNGB1,P2RX2,SLC4A7,NPY2R,SLC9C2,GRIA1,MCOLN3,JPH1,NELL2
3.AD/1.YC	Immature	Up	GO BP	GOBP_REGULATION_OF_MEMBRANE_POTENTIAL	GOBP_REGULATION_OF_MEMBRANE_POTENTIAL	1.93176	9.16466e-06	0.00299063	PTK2B,CD36,ADRA1A,GRM1,CACNB2,CHRNA1,KCNJ3,SLC8A2,GNA14,OPRD1,P2RX2,NPY2R,CACNA1E,KCNK1,CNIH3,GRIA1,GABRQ
3.AD/1.YC	Immature	Up	GO BP	GOBP_CARDIAC_CHAMBER_DEVELOPMENT	GOBP_CARDIAC_CHAMBER_DEVELOPMENT	2.67267	9.86212e-06	0.00299063	ZFPM2,SLIT3,ACVR1,PROX1,NRP1,SEMA3C,NRP2,JAG1,ADAMTS6,NPY2R
3.AD/1.YC	Immature	Up	GO BP	GOBP_REGULATION_OF_CYTOSOLIC_CALCIUM_ION_CONCENTRATION	GOBP_REGULATION_OF_CYTOSOLIC_CALCIUM_ION_CONCENTRATION	2.071	9.88639e-06	0.00299063	PTK2B,PTGFR,CD36,ADRA1A,GRM1,CACNB2,SLC8A2,CALB1,PLCG2,CNGB1,P2RX2,NPY2R,GRIA1,MCOLN3,JPH1
3.AD/1.YC	Immature	Up	GO BP	GOBP_HEART_DEVELOPMENT	GOBP_HEART_DEVELOPMENT	1.7711	1.31802e-05	0.00377717	ZFPM2,PCSK5,PPARG,SLIT3,ACVR1,PROX1,ADRA1A,NRP1,DAW1,SEMA3C,FLRT3,NRP2,FAT4,JAG1,ADAMTS6,BICC1,ALDH1A2,NPY2R,RBM20
3.AD/1.YC	Immature	Up	GO BP	GOBP_REGULATION_OF_TRANS_SYNAPTIC_SIGNALING	GOBP_REGULATION_OF_TRANS_SYNAPTIC_SIGNALING	1.91056	1.91339e-05	0.0052092	PTK2B,SHISA6,ADRA1A,GRM1,PPFIA2,UNC13C,CACNB2,MCTP1,SLC8A2,CALB1,DGKB,NPY2R,GRIA1,SHISA9,CLSTN2,NPTXR
3.AD/1.YC	Immature	Up	GO BP	GOBP_CELLULAR_ION_HOMEOSTASIS	GOBP_CELLULAR_ION_HOMEOSTASIS	1.60051	2.65987e-05	0.0068442	PTK2B,PTGFR,NOX5,STC2,ATP6V1H,CD36,ADRA1A,GRM1,SLC24A3,CACNB2,SLC8A2,CALB1,PLCG2,CNGB1,P2RX2,SLC4A7,NPY2R,SLC9C2,GRIA1,MCOLN3,JPH1
3.AD/1.YC	Immature	Up	GO BP	GOBP_REGULATION_OF_NERVOUS_SYSTEM_PROCESS	GOBP_REGULATION_OF_NERVOUS_SYSTEM_PROCESS	2.66597	2.76533e-05	0.0068442	PTK2B,SHISA6,GRM1,PARD3,SLC8A2,OPRD1,NPY2R,SHISA9,NPTXR
3.AD/1.YC	Immature	Up	GO BP	GOBP_REGULATION_OF_CATION_CHANNEL_ACTIVITY	GOBP_REGULATION_OF_CATION_CHANNEL_ACTIVITY	2.46022	3.23903e-05	0.00766804	PTK2B,SHISA6,LRRC7,CACNB2,PLCG2,DAPK1,CNIH3,GRIA1,JPH1,SHISA9
3.AD/1.YC	Immature	Up	GO BP	GOBP_NEURON_CELLULAR_HOMEOSTASIS	GOBP_NEURON_CELLULAR_HOMEOSTASIS	3.9648	3.60471e-05	0.00785105	CACNB2,CHRNA1,SLC8A2,CALB1,NELL2
3.AD/1.YC	Immature	Up	GO BP	GOBP_DIVALENT_INORGANIC_CATION_HOMEOSTASIS	GOBP_DIVALENT_INORGANIC_CATION_HOMEOSTASIS	1.69952	6.20397e-05	0.0129926	PTK2B,PTGFR,STC2,CD36,ADRA1A,GRM1,SLC24A3,CACNB2,SLC8A2,CALB1,PLCG2,CNGB1,P2RX2,NPY2R,GRIA1,MCOLN3,JPH1
3.AD/1.YC	Immature	Up	GO BP	GOBP_BIOLOGICAL_ADHESION	GOBP_BIOLOGICAL_ADHESION	1.18791	8.08087e-05	0.016162	PTK2B,ACVR1,CD36,EPHA7,LRRC7,TIAM1,NRP1,PARD3,CDH8,DAB1,FLRT3,ITGA7,PTPRO,PPFIA2,ITGA8,NRP2,SEMA5A,PLXNA4,COL19A1,FAT4,CCN4,JAG1,IL1RAP,ARHGAP6,PLEKHA2,NPY2R,SDK1,SPON1,STXBP6,PCDH19,CLSTN2,PCDH20,NCAM2,EDIL3
3.AD/1.YC	Immature	Up	GO BP	GOBP_NEURAL_CREST_CELL_DIFFERENTIATION	GOBP_NEURAL_CREST_CELL_DIFFERENTIATION	2.89378	8.31105e-05	0.016162	ACVR1,NRP1,SEMA3C,NRP2,SEMA5A,JAG1,ALDH1A2
3.AD/1.YC	Immature	Up	GO BP	GOBP_CILIUM_MOVEMENT	GOBP_CILIUM_MOVEMENT	2.43209	8.99687e-05	0.0164386	CFAP54,CFAP44,CFAP43,NEK10,DAW1,HYDIN,RFX3,TEKT1,DNAH9
3.AD/1.YC	Immature	Up	GO BP	GOBP_HEART_MORPHOGENESIS	GOBP_HEART_MORPHOGENESIS	2.1393	9.11671e-05	0.0164386	ZFPM2,SLIT3,ACVR1,PROX1,NRP1,SEMA3C,NRP2,FAT4,JAG1,ALDH1A2,NPY2R
3.AD/1.YC	Immature	Up	GO BP	GOBP_SEMAPHORIN_PLEXIN_SIGNALING_PATHWAY	GOBP_SEMAPHORIN_PLEXIN_SIGNALING_PATHWAY	3.64228	9.35896e-05	0.0164386	NRP1,SEMA3C,NRP2,SEMA5A,PLXNA4
3.AD/1.YC	Immature	Up	GO BP	GOBP_NEUROTRANSMITTER_TRANSPORT	GOBP_NEUROTRANSMITTER_TRANSPORT	2.16761	0.000158655	0.0269961	ADRA1A,PPFIA2,RAB3B,NAAA,PCLO,UNC13C,CACNB2,MCTP1,OTOF,GABRQ
3.AD/1.YC	Immature	Up	GO BP	GOBP_REGULATION_OF_NEUROTRANSMITTER_LEVELS	GOBP_REGULATION_OF_NEUROTRANSMITTER_LEVELS	2.16025	0.000164978	0.0272214	ADRA1A,PPFIA2,RAB3B,NAAA,PCLO,MAOB,UNC13C,CACNB2,MCTP1,OTOF
3.AD/1.YC	Immature	Up	GO BP	GOBP_OUTFLOW_TRACT_MORPHOGENESIS	GOBP_OUTFLOW_TRACT_MORPHOGENESIS	3.01766	0.000170973	0.0272601	ZFPM2,NRP1,SEMA3C,NRP2,JAG1,NPY2R
3.AD/1.YC	Immature	Up	GO BP	GOBP_OUTFLOW_TRACT_SEPTUM_MORPHOGENESIS	GOBP_OUTFLOW_TRACT_SEPTUM_MORPHOGENESIS	4.05062	0.000182228	0.0272601	ZFPM2,NRP1,SEMA3C,NRP2
3.AD/1.YC	Immature	Up	GO BP	GOBP_REGULATION_OF_SYNAPSE_STRUCTURE_OR_ACTIVITY	GOBP_REGULATION_OF_SYNAPSE_STRUCTURE_OR_ACTIVITY	2.13838	0.000185239	0.0272601	EPHA7,TIAM1,CDH8,FLRT3,PPFIA2,NRP2,DGKB,IL1RAP,CLSTN2,C1QL3
3.AD/1.YC	Immature	Up	GO BP	GOBP_DEVELOPMENTAL_CELL_GROWTH	GOBP_DEVELOPMENTAL_CELL_GROWTH	2.13116	0.000192441	0.0275747	SLIT3,ADRA1A,EPHA7,TIAM1,NRP1,SEMA3C,FLRT3,NRP2,SEMA5A,PLXNA4
3.AD/1.YC	Immature	Up	GO BP	GOBP_CELL_PROJECTION_ORGANIZATION	GOBP_CELL_PROJECTION_ORGANIZATION	1.08811	0.000231363	0.0317478	CFAP54,ADAMTS16,PTK2B,CFAP44,SLIT3,CFAP43,EPHA7,LRRC7,TIAM1,NRP1,DAW1,HYDIN,PARD3,SEMA3C,DAB1,FLRT3,PTPRO,BCL11B,PPFIA2,NRP2,SEMA5A,PLXNA4,PLPPR4,FAT4,RFX3,TEKT1,DGKG,DNAH9,SDK1,NCAM2,TTC39C,CSMD3,SPATA13,GPRIN3
3.AD/1.YC	Immature	Up	GO BP	GOBP_CELL_SUBSTRATE_ADHESION	GOBP_CELL_SUBSTRATE_ADHESION	1.78616	0.000233225	0.0317478	PTK2B,CD36,TIAM1,NRP1,ITGA7,PTPRO,PPFIA2,ITGA8,JAG1,ARHGAP6,PLEKHA2,NPY2R,EDIL3
3.AD/1.YC	Immature	Up	GO BP	GOBP_CELL_MATRIX_ADHESION	GOBP_CELL_MATRIX_ADHESION	2.05405	0.000288497	0.0383138	PTK2B,CD36,TIAM1,NRP1,ITGA7,PPFIA2,ITGA8,JAG1,ARHGAP6,PLEKHA2
3.AD/1.YC	Immature	Up	GO BP	GOBP_IMPORT_INTO_CELL	GOBP_IMPORT_INTO_CELL	2.02699	0.000332144	0.042044	NOX5,SLC27A2,CD36,GRM1,RAB3B,KCNJ3,SLC8A2,SLC47A1,SLC9C2,KCNJ6
3.AD/1.YC	Immature	Up	GO BP	GOBP_CARDIAC_VENTRICLE_DEVELOPMENT	GOBP_CARDIAC_VENTRICLE_DEVELOPMENT	2.53882	0.000343664	0.042044	ZFPM2,SLIT3,ACVR1,PROX1,SEMA3C,JAG1,NPY2R
3.AD/1.YC	Immature	Up	GO BP	GOBP_UROGENITAL_SYSTEM_DEVELOPMENT	GOBP_UROGENITAL_SYSTEM_DEVELOPMENT	1.80417	0.000352438	0.042044	ADAMTS16,PCSK5,PROX1,EPHA7,PTPRO,ITGA8,FAT4,JAG1,ADAMTS6,CALB1,BICC1,ALDH1A2
3.AD/1.YC	Immature	Up	GO BP	GOBP_ION_HOMEOSTASIS	GOBP_ION_HOMEOSTASIS	1.34678	0.000360373	0.042044	PTK2B,PTGFR,NOX5,STC2,ATP6V1H,CD36,ADRA1A,GRM1,SLC24A3,CACNB2,SLC8A2,CALB1,PLCG2,CNGB1,P2RX2,SLC4A7,NPY2R,SLC9C2,GRIA1,MCOLN3,JPH1
3.AD/1.YC	Immature	Up	GO BP	GOBP_REGULATION_OF_TRANSPORTER_ACTIVITY	GOBP_REGULATION_OF_TRANSPORTER_ACTIVITY	1.89225	0.000370636	0.042044	PTK2B,SHISA6,PPARG,LRRC7,CACNB2,PLCG2,DAPK1,CNIH3,GRIA1,JPH1,SHISA9
3.AD/1.YC	Immature	Up	GO BP	GOBP_REGULATION_OF_SHORT_TERM_NEURONAL_SYNAPTIC_PLASTICITY	GOBP_REGULATION_OF_SHORT_TERM_NEURONAL_SYNAPTIC_PLASTICITY	4.69855	0.000401411	0.0429903	SHISA6,SLC8A2,SHISA9
3.AD/1.YC	Immature	Up	GO BP	GOBP_SEMAPHORIN_PLEXIN_SIGNALING_PATHWAY_INVOLVED_IN_NEURON_PROJECTION_GUIDANCE	GOBP_SEMAPHORIN_PLEXIN_SIGNALING_PATHWAY_INVOLVED_IN_NEURON_PROJECTION_GUIDANCE	4.69855	0.000401411	0.0429903	NRP1,NRP2,PLXNA4
3.AD/1.YC	Immature	Up	GO BP	GOBP_NEURON_PROJECTION_GUIDANCE	GOBP_NEURON_PROJECTION_GUIDANCE	1.87571	0.000406204	0.0429903	SLIT3,EPHA7,NRP1,SEMA3C,DAB1,FLRT3,PTPRO,BCL11B,NRP2,SEMA5A,PLXNA4
3.AD/1.YC	Immature	Up	GO BP	GOBP_SIGNAL_RELEASE	GOBP_SIGNAL_RELEASE	1.5565	0.00042338	0.0429903	PCSK5,ADRA1A,TIAM1,PPFIA2,NAAA,PCLO,MAOB,UNC13C,CACNB2,MCTP1,OTOF,RFX3,NPY2R,CACNA1E,SYT10
3.AD/1.YC	Immature	Up	GO BP	GOBP_NEURAL_CREST_CELL_MIGRATION	GOBP_NEURAL_CREST_CELL_MIGRATION	3.12662	0.000430023	0.0429903	ACVR1,NRP1,SEMA3C,NRP2,SEMA5A
3.AD/1.YC	Immature	Up	GO BP	GOBP_NEUROTRANSMITTER_SECRETION	GOBP_NEUROTRANSMITTER_SECRETION	2.27392	0.000431947	0.0429903	ADRA1A,PPFIA2,NAAA,PCLO,UNC13C,CACNB2,MCTP1,OTOF
3.AD/1.YC	Immature	Up	GO BP	GOBP_TRANSMEMBRANE_TRANSPORT	GOBP_TRANSMEMBRANE_TRANSPORT	1.04745	0.000434245	0.0429903	PTK2B,SHISA6,NOX5,ATP6V1H,CD36,GRM1,LRRC7,SLC24A3,CACNB2,CHRNA1,KCNJ3,SLC8A2,PLCG2,MT-ND4,CNGB1,P2RX2,SLC4A7,CACNA1E,KCNK1,SLC47A1,MT-ATP6,MT-ATP8,MT-CYB,DAPK1,TMC2,CNIH3,SLC9C2,GRIA1,KCNJ6,MCOLN3,JPH1,SHISA9,GABRQ,GPR155
3.AD/1.YC	Immature	Up	GO BP	GOBP_NEURON_DIFFERENTIATION	GOBP_NEURON_DIFFERENTIATION	1.08646	0.000458706	0.0441701	PTK2B,SLIT3,PROX1,EPHA7,LRRC7,TIAM1,NRP1,PARD3,SEMA3C,DAB1,FLRT3,PTPRO,BCL11B,PPFIA2,NRP2,SEMA5A,PLXNA4,PLPPR4,FAT4,JAG1,ALDH1A2,DGKG,CNGB1,SLC4A7,SDK1,MCOLN3,NCAM2,CSMD3,BHLHE22,GPRIN3
3.AD/1.YC	Immature	Up	GO BP	GOBP_METAL_ION_HOMEOSTASIS	GOBP_METAL_ION_HOMEOSTASIS	1.39345	0.000462386	0.0441701	PTK2B,PTGFR,NOX5,STC2,CD36,ADRA1A,GRM1,SLC24A3,CACNB2,SLC8A2,CALB1,PLCG2,CNGB1,P2RX2,NPY2R,GRIA1,MCOLN3,JPH1
3.AD/1.YC	Immature	Up	GO BP	GOBP_CHEMICAL_HOMEOSTASIS	GOBP_CHEMICAL_HOMEOSTASIS	1.14699	0.00047765	0.0448414	PTK2B,LEPR,PPARG,PTGFR,NOX5,STC2,ATP6V1H,ZBTB20,CD36,ADRA1A,GRM1,TIAM1,CCN4,SLC24A3,CACNB2,SLC8A2,CALB1,PLCG2,CNGB1,P2RX2,SLC4A7,NPY2R,MYO5B,SLC9C2,GRIA1,MCOLN3,JPH1
3.AD/1.YC	Immature	Up	GO BP	GOBP_REGULATION_OF_POSTSYNAPSE_ORGANIZATION	GOBP_REGULATION_OF_POSTSYNAPSE_ORGANIZATION	2.71685	0.000486361	0.0448854	EPHA7,TIAM1,PPFIA2,NRP2,DGKB,IL1RAP
3.AD/1.YC	Immature	Up	GO BP	GOBP_POSTSYNAPSE_ORGANIZATION	GOBP_POSTSYNAPSE_ORGANIZATION	2.22481	0.000534265	0.0484846	SHISA6,EPHA7,TIAM1,PPFIA2,NRP2,DGKB,IL1RAP,CNKSR2
3.AD/1.YC	Immature	Up	GO BP	GOBP_SYNAPTIC_TRANSMISSION_GLUTAMATERGIC	GOBP_SYNAPTIC_TRANSMISSION_GLUTAMATERGIC	2.66349	0.000584189	0.052146	PTK2B,GRM1,CDH8,UNC13C,NPY2R,CNIH3
3.AD/1.YC	Immature	Up	GO BP	GOBP_EXTRACELLULAR_TRANSPORT	GOBP_EXTRACELLULAR_TRANSPORT	3.53573	0.000615884	0.0527365	CFAP43,NEK10,DAW1,RFX3
3.AD/1.YC	Immature	Up	GO BP	GOBP_ANATOMICAL_STRUCTURE_ARRANGEMENT	GOBP_ANATOMICAL_STRUCTURE_ARRANGEMENT	4.43523	0.000627795	0.0527365	DAB1,NRP2,PLXNA4
3.AD/1.YC	Immature	Up	GO BP	GOBP_EPITHELIAL_CELL_FATE_COMMITMENT	GOBP_EPITHELIAL_CELL_FATE_COMMITMENT	4.43523	0.000627795	0.0527365	ACVR1,PROX1,NRP1
3.AD/1.YC	Immature	Up	GO BP	GOBP_NEURON_PROJECTION_EXTENSION	GOBP_NEURON_PROJECTION_EXTENSION	2.18696	0.000629545	0.0527365	SLIT3,TIAM1,NRP1,SEMA3C,FLRT3,NRP2,SEMA5A,PLXNA4
3.AD/1.YC	Immature	Up	GO BP	GOBP_REGULATION_OF_POSTSYNAPTIC_NEUROTRANSMITTER_RECEPTOR_ACTIVITY	GOBP_REGULATION_OF_POSTSYNAPTIC_NEUROTRANSMITTER_RECEPTOR_ACTIVITY	4.31964	0.000766106	0.0615197	SHISA6,SHISA9,NPTXR
3.AD/1.YC	Immature	Up	GO BP	GOBP_VENTRICULAR_SEPTUM_MORPHOGENESIS	GOBP_VENTRICULAR_SEPTUM_MORPHOGENESIS	3.44214	0.00076829	0.0615197	ZFPM2,SLIT3,ACVR1,PROX1
3.AD/1.YC	Immature	Up	GO BP	GOBP_REGULATION_OF_NMDA_RECEPTOR_ACTIVITY	GOBP_REGULATION_OF_NMDA_RECEPTOR_ACTIVITY	3.44214	0.00076829	0.0615197	PTK2B,LRRC7,DAPK1,GRIA1
3.AD/1.YC	Immature	Up	GO BP	GOBP_AXON_DEVELOPMENT	GOBP_AXON_DEVELOPMENT	1.46548	0.000780472	0.0615894	SLIT3,EPHA7,TIAM1,NRP1,PARD3,SEMA3C,DAB1,FLRT3,PTPRO,BCL11B,NRP2,SEMA5A,PLXNA4,PLPPR4,NCAM2
3.AD/1.YC	Immature	Up	GO BP	GOBP_REGULATION_OF_CELL_SUBSTRATE_ADHESION	GOBP_REGULATION_OF_CELL_SUBSTRATE_ADHESION	1.97846	0.00080216	0.0623966	PTK2B,CD36,NRP1,PTPRO,JAG1,ARHGAP6,PLEKHA2,NPY2R,EDIL3
3.AD/1.YC	Immature	Up	GO BP	GOBP_ACTION_POTENTIAL	GOBP_ACTION_POTENTIAL	2.31095	0.000834333	0.0639851	CD36,ADRA1A,CACNB2,CHRNA1,KCNJ3,SLC8A2,GNA14
3.AD/1.YC	Immature	Up	GO BP	GOBP_REGULATION_OF_POSTSYNAPTIC_MEMBRANE_POTENTIAL	GOBP_REGULATION_OF_POSTSYNAPTIC_MEMBRANE_POTENTIAL	2.26485	0.000995694	0.0736108	PTK2B,GRM1,CHRNA1,SLC8A2,P2RX2,NPY2R,GRIA1
3.AD/1.YC	Immature	Up	GO BP	GOBP_NEGATIVE_REGULATION_OF_AXONOGENESIS	GOBP_NEGATIVE_REGULATION_OF_AXONOGENESIS	2.83917	0.000997059	0.0736108	EPHA7,NRP1,SEMA3C,DAB1,SEMA5A
3.AD/1.YC	Immature	Up	GO BP	GOBP_REGULATION_OF_SYNAPTIC_PLASTICITY	GOBP_REGULATION_OF_SYNAPTIC_PLASTICITY	2.07823	0.0010004	0.0736108	PTK2B,SHISA6,UNC13C,MCTP1,SLC8A2,CALB1,GRIA1,SHISA9
3.AD/1.YC	Immature	Up	GO BP	GOBP_POSITIVE_REGULATION_OF_JUN_KINASE_ACTIVITY	GOBP_POSITIVE_REGULATION_OF_JUN_KINASE_ACTIVITY	2.81509	0.00106748	0.0774994	PTK2B,MAP3K20,DUSP19,MAP3K4,TIAM1
3.AD/1.YC	Immature	Up	GO BP	GOBP_NEURON_DEVELOPMENT	GOBP_NEURON_DEVELOPMENT	1.0929	0.0011239	0.0805215	PTK2B,SLIT3,EPHA7,LRRC7,TIAM1,NRP1,PARD3,SEMA3C,DAB1,FLRT3,PTPRO,BCL11B,PPFIA2,NRP2,SEMA5A,PLXNA4,PLPPR4,FAT4,DGKG,CNGB1,SLC4A7,SDK1,NCAM2,CSMD3,GPRIN3
3.AD/1.YC	Immature	Up	GO BP	GOBP_DEVELOPMENTAL_GROWTH_INVOLVED_IN_MORPHOGENESIS	GOBP_DEVELOPMENTAL_GROWTH_INVOLVED_IN_MORPHOGENESIS	1.8942	0.0011837	0.0837018	SLIT3,EPHA7,TIAM1,NRP1,SEMA3C,FLRT3,NRP2,SEMA5A,PLXNA4
3.AD/1.YC	Immature	Up	GO BP	GOBP_CARDIAC_VENTRICLE_MORPHOGENESIS	GOBP_CARDIAC_VENTRICLE_MORPHOGENESIS	2.7693	0.00121932	0.0837018	ZFPM2,PROX1,SEMA3C,JAG1,NPY2R
3.AD/1.YC	Immature	Up	GO BP	GOBP_CIRCULATORY_SYSTEM_DEVELOPMENT	GOBP_CIRCULATORY_SYSTEM_DEVELOPMENT	1.12761	0.0012431	0.0837018	PTK2B,ZFPM2,LEPR,PCSK5,PPARG,SLIT3,NOX5,ACVR1,PROX1,ADRA1A,NRP1,DAW1,SEMA3C,FLRT3,NRP2,SEMA5A,FAT4,JAG1,ADAMTS6,BICC1,ALDH1A2,CEMIP2,NPY2R,RBM20
3.AD/1.YC	Immature	Up	GO BP	GOBP_SYNAPTIC_VESICLE_EXOCYTOSIS	GOBP_SYNAPTIC_VESICLE_EXOCYTOSIS	2.43763	0.0012581	0.0837018	ADRA1A,PPFIA2,PCLO,UNC13C,CACNB2,OTOF
3.AD/1.YC	Immature	Up	GO BP	GOBP_CELL_CELL_ADHESION_VIA_PLASMA_MEMBRANE_ADHESION_MOLECULES	GOBP_CELL_CELL_ADHESION_VIA_PLASMA_MEMBRANE_ADHESION_MOLECULES	1.76345	0.00126013	0.0837018	ACVR1,CDH8,DAB1,FLRT3,FAT4,IL1RAP,SDK1,PCDH19,CLSTN2,PCDH20
3.AD/1.YC	Immature	Up	GO BP	GOBP_INORGANIC_ION_TRANSMEMBRANE_TRANSPORT	GOBP_INORGANIC_ION_TRANSMEMBRANE_TRANSPORT	1.21615	0.00126845	0.0837018	PTK2B,NOX5,ATP6V1H,SLC24A3,CACNB2,KCNJ3,SLC8A2,PLCG2,MT-ND4,SLC4A7,CACNA1E,KCNK1,MT-ATP6,MT-ATP8,MT-CYB,TMC2,SLC9C2,KCNJ6,MCOLN3,JPH1,GABRQ
3.AD/1.YC	Immature	Up	GO BP	GOBP_REGULATION_OF_NEURON_PROJECTION_DEVELOPMENT	GOBP_REGULATION_OF_NEURON_PROJECTION_DEVELOPMENT	1.50831	0.00127589	0.0837018	PTK2B,EPHA7,LRRC7,TIAM1,NRP1,SEMA3C,DAB1,PTPRO,PPFIA2,SEMA5A,PLXNA4,DGKG,CSMD3
3.AD/1.YC	Immature	Up	GO BP	GOBP_RETINAL_GANGLION_CELL_AXON_GUIDANCE	GOBP_RETINAL_GANGLION_CELL_AXON_GUIDANCE	4.0207	0.00129217	0.0837605	EPHA7,NRP1,PTPRO
3.AD/1.YC	Immature	Up	GO BP	GOBP_ADENYLATE_CYCLASE_MODULATING_G_PROTEIN_COUPLED_RECEPTOR_SIGNALING_PATHWAY	GOBP_ADENYLATE_CYCLASE_MODULATING_G_PROTEIN_COUPLED_RECEPTOR_SIGNALING_PATHWAY	1.86718	0.00133938	0.0857991	ADGRG2,PTGFR,ADRA1A,GNA14,PTH2R,OPRD1,NPY2R,GNAL,HTR4
3.AD/1.YC	Immature	Up	GO BP	GOBP_CARDIAC_RIGHT_VENTRICLE_MORPHOGENESIS	GOBP_CARDIAC_RIGHT_VENTRICLE_MORPHOGENESIS	3.93336	0.00150732	0.0943493	ZFPM2,SEMA3C,JAG1
3.AD/1.YC	Immature	Up	GO BP	GOBP_ENDOTHELIAL_CELL_PROLIFERATION	GOBP_ENDOTHELIAL_CELL_PROLIFERATION	2.15551	0.00150751	0.0943493	PPARG,NOX5,PROX1,NRP1,NRP2,SEMA5A,ALDH1A2
3.AD/1.YC	Immature	Up	GO BP	GOBP_REGULATION_OF_NEURONAL_SYNAPTIC_PLASTICITY	GOBP_REGULATION_OF_NEURONAL_SYNAPTIC_PLASTICITY	3.11979	0.00164756	0.100797	SHISA6,MCTP1,SLC8A2,SHISA9
3.AD/1.YC	Immature	Up	GO BP	GOBP_REGULATION_OF_CATION_TRANSMEMBRANE_TRANSPORT	GOBP_REGULATION_OF_CATION_TRANSMEMBRANE_TRANSPORT	1.60962	0.00168726	0.102079	PTK2B,SHISA6,LRRC7,CACNB2,PLCG2,DAPK1,TMC2,CNIH3,GRIA1,JPH1,SHISA9
3.AD/1.YC	Immature	Up	GO BP	GOBP_SYMPATHETIC_NERVOUS_SYSTEM_DEVELOPMENT	GOBP_SYMPATHETIC_NERVOUS_SYSTEM_DEVELOPMENT	3.85106	0.00174364	0.104331	NRP1,NRP2,PLXNA4
3.AD/1.YC	Immature	Up	GO BP	GOBP_CALCIUM_ION_TRANSPORT_INTO_CYTOSOL	GOBP_CALCIUM_ION_TRANSPORT_INTO_CYTOSOL	2.1037	0.00183042	0.108333	PTK2B,ADRA1A,SLC8A2,PLCG2,P2RX2,MCOLN3,JPH1
3.AD/1.YC	Immature	Up	GO BP	GOBP_REGULATION_OF_AXONOGENESIS	GOBP_REGULATION_OF_AXONOGENESIS	2.09353	0.00190099	0.110836	EPHA7,TIAM1,NRP1,SEMA3C,DAB1,SEMA5A,PLXNA4
3.AD/1.YC	Immature	Up	GO BP	GOBP_NEUROGENESIS	GOBP_NEUROGENESIS	0.923349	0.00191342	0.110836	PTK2B,LEPR,PPARG,SLIT3,PROX1,EPHA7,LRRC7,TIAM1,NRP1,PARD3,SEMA3C,DAB1,FLRT3,PTPRO,BCL11B,PPFIA2,NRP2,SEMA5A,PLXNA4,PLPPR4,FAT4,JAG1,ALDH1A2,DGKG,CNGB1,SLC4A7,SDK1,MCOLN3,NCAM2,CSMD3,BHLHE22,GPRIN3
3.AD/1.YC	Immature	Up	GO BP	GOBP_RESPONSE_TO_HYPEROXIA	GOBP_RESPONSE_TO_HYPEROXIA	3.77202	0.00200185	0.114738	PPARG,MT-ATP6,MT-CYB
3.AD/1.YC	Immature	Up	GO BP	GOBP_PROTON_TRANSMEMBRANE_TRANSPORT	GOBP_PROTON_TRANSMEMBRANE_TRANSPORT	2.07355	0.00204846	0.115753	NOX5,ATP6V1H,MT-ND4,MT-ATP6,MT-ATP8,MT-CYB,SLC9C2
3.AD/1.YC	Immature	Up	GO BP	GOBP_CELL_MORPHOGENESIS_INVOLVED_IN_DIFFERENTIATION	GOBP_CELL_MORPHOGENESIS_INVOLVED_IN_DIFFERENTIATION	1.20275	0.00206209	0.115753	SLIT3,PROX1,EPHA7,TIAM1,NRP1,PARD3,SEMA3C,DAB1,SIPA1L3,FLRT3,PTPRO,BCL11B,PPFIA2,ITGA8,NRP2,SEMA5A,PLXNA4,PLPPR4
3.AD/1.YC	Immature	Up	GO BP	GOBP_NEUROMUSCULAR_JUNCTION_DEVELOPMENT	GOBP_NEUROMUSCULAR_JUNCTION_DEVELOPMENT	3.01524	0.00210719	0.116264	UNC13C,CACNB2,CHRNA1,P2RX2
3.AD/1.YC	Immature	Up	GO BP	GOBP_AXON_EXTENSION	GOBP_AXON_EXTENSION	2.28152	0.00211389	0.116264	SLIT3,NRP1,SEMA3C,NRP2,SEMA5A,PLXNA4
3.AD/1.YC	Immature	Up	GO BP	GOBP_ACTIVATION_OF_GTPASE_ACTIVITY	GOBP_ACTIVATION_OF_GTPASE_ACTIVITY	2.26815	0.0022092	0.120291	PTK2B,TIAM1,SIPA1L3,TBC1D1,TBC1D26,SYDE2
3.AD/1.YC	Immature	Up	GO BP	GOBP_CALCIUM_ION_TRANSPORT	GOBP_CALCIUM_ION_TRANSPORT	1.45909	0.0024735	0.130938	PTK2B,ADRA1A,SLC24A3,CACNB2,SLC8A2,PLCG2,OPRD1,P2RX2,CACNA1E,TMC2,MCOLN3,JPH1
3.AD/1.YC	Immature	Up	GO BP	GOBP_EAR_DEVELOPMENT	GOBP_EAR_DEVELOPMENT	1.85978	0.00247688	0.130938	PROX1,PLPPR4,FAT4,JAG1,CALB1,SLC4A7,MCOLN3,TTC39C
3.AD/1.YC	Immature	Up	GO BP	GOBP_REGULATION_OF_JUN_KINASE_ACTIVITY	GOBP_REGULATION_OF_JUN_KINASE_ACTIVITY	2.50152	0.00262369	0.136664	PTK2B,MAP3K20,DUSP19,MAP3K4,TIAM1
3.AD/1.YC	Immature	Up	GO BP	GOBP_IMPORT_ACROSS_PLASMA_MEMBRANE	GOBP_IMPORT_ACROSS_PLASMA_MEMBRANE	2.00531	0.00263539	0.136664	CD36,GRM1,KCNJ3,SLC8A2,SLC47A1,SLC9C2,KCNJ6
3.AD/1.YC	Immature	Up	GO BP	GOBP_REGULATION_OF_CELL_MATRIX_ADHESION	GOBP_REGULATION_OF_CELL_MATRIX_ADHESION	2.2032	0.00273522	0.13919	PTK2B,CD36,NRP1,JAG1,ARHGAP6,PLEKHA2
3.AD/1.YC	Immature	Up	GO BP	GOBP_POSITIVE_REGULATION_OF_CELL_SUBSTRATE_ADHESION	GOBP_POSITIVE_REGULATION_OF_CELL_SUBSTRATE_ADHESION	2.2032	0.00273522	0.13919	PTK2B,CD36,NRP1,PLEKHA2,NPY2R,EDIL3
3.AD/1.YC	Immature	Up	GO BP	GOBP_CILIUM_OR_FLAGELLUM_DEPENDENT_CELL_MOTILITY	GOBP_CILIUM_OR_FLAGELLUM_DEPENDENT_CELL_MOTILITY	2.16535	0.00309289	0.154502	CFAP54,CFAP44,CFAP43,DNAH6,RFX3,TEKT1
3.AD/1.YC	Immature	Up	GO BP	GOBP_REGULATION_OF_NERVOUS_SYSTEM_DEVELOPMENT	GOBP_REGULATION_OF_NERVOUS_SYSTEM_DEVELOPMENT	1.41031	0.00320624	0.156576	PPARG,EPHA7,TIAM1,NRP1,PARD3,SEMA3C,DAB1,FLRT3,SEMA5A,PLXNA4,IL1RAP,CLSTN2
3.AD/1.YC	Immature	Up	GO BP	GOBP_NEGATIVE_REGULATION_OF_AXON_EXTENSION_INVOLVED_IN_AXON_GUIDANCE	GOBP_NEGATIVE_REGULATION_OF_AXON_EXTENSION_INVOLVED_IN_AXON_GUIDANCE	3.49634	0.00326687	0.156576	NRP1,SEMA3C,SEMA5A
3.AD/1.YC	Immature	Up	GO BP	GOBP_REGULATION_OF_AMPA_RECEPTOR_ACTIVITY	GOBP_REGULATION_OF_AMPA_RECEPTOR_ACTIVITY	3.49634	0.00326687	0.156576	SHISA6,CNIH3,SHISA9
3.AD/1.YC	Immature	Up	GO BP	GOBP_POSITIVE_REGULATION_OF_CELL_MATRIX_ADHESION	GOBP_POSITIVE_REGULATION_OF_CELL_MATRIX_ADHESION	2.82603	0.00327818	0.156576	PTK2B,CD36,NRP1,PLEKHA2
3.AD/1.YC	Immature	Up	GO BP	GOBP_GLUTAMATE_RECEPTOR_SIGNALING_PATHWAY	GOBP_GLUTAMATE_RECEPTOR_SIGNALING_PATHWAY	2.82603	0.00327818	0.156576	PTK2B,GRM1,TIAM1,GRIA1
3.AD/1.YC	Immature	Up	GO BP	GOBP_CELL_MORPHOGENESIS	GOBP_CELL_MORPHOGENESIS	1.02672	0.00342871	0.162158	PTK2B,SLIT3,PROX1,EPHA7,TIAM1,NRP1,PARD3,CDH8,SEMA3C,DAB1,SIPA1L3,FLRT3,ITGA7,PTPRO,ARHGEF28,BCL11B,PPFIA2,ITGA8,NRP2,SEMA5A,PLXNA4,PLPPR4
3.AD/1.YC	Immature	Up	GO BP	GOBP_POSITIVE_REGULATION_OF_PROTEIN_PHOSPHORYLATION	GOBP_POSITIVE_REGULATION_OF_PROTEIN_PHOSPHORYLATION	1.11311	0.00347768	0.162158	PTK2B,LEPR,ACVR1,ACVR2A,MAP3K20,PROX1,CD36,DUSP19,ADRA1A,NEK10,EPHA7,GRM1,MAP3K4,BANK1,TIAM1,NRP1,DAB1,SLC8A2,OPRD1
3.AD/1.YC	Immature	Up	GO BP	GOBP_SPECIFICATION_OF_SYMMETRY	GOBP_SPECIFICATION_OF_SYMMETRY	2.12852	0.00348439	0.162158	ACVR1,ACVR2A,DAW1,RFX3,BICC1,ALDH1A2
3.AD/1.YC	Immature	Up	GO BP	GOBP_IONOTROPIC_GLUTAMATE_RECEPTOR_SIGNALING_PATHWAY	GOBP_IONOTROPIC_GLUTAMATE_RECEPTOR_SIGNALING_PATHWAY	3.43518	0.00364419	0.168158	PTK2B,TIAM1,GRIA1
3.AD/1.YC	Immature	Up	GO BP	GOBP_HOMEOSTATIC_PROCESS	GOBP_HOMEOSTATIC_PROCESS	0.83161	0.00372793	0.168334	PTK2B,LEPR,PPARG,PTGFR,NOX5,STC2,ACVR2A,ATP6V1H,ZBTB20,CD36,ADRA1A,GRM1,MAP3K4,TIAM1,POLE,RFC3,CCN4,SLC24A3,CACNB2,CHRNA1,SLC8A2,CALB1,PTH2R,PLCG2,CNGB1,P2RX2,SLC4A7,DYRK3,NPY2R,MYO5B,SLC9C2,GRIA1,MCOLN3,JPH1,NELL2
3.AD/1.YC	Immature	Up	GO BP	GOBP_CELL_JUNCTION_ASSEMBLY	GOBP_CELL_JUNCTION_ASSEMBLY	1.38116	0.00373853	0.168334	PTK2B,EPHA7,NRP1,PARD3,CDH8,FLRT3,PTPRO,PCLO,IL1RAP,ARHGAP6,SDK1,CLSTN2
3.AD/1.YC	Immature	Up	GO BP	GOBP_REGULATION_OF_SYSTEMIC_ARTERIAL_BLOOD_PRESSURE	GOBP_REGULATION_OF_SYSTEMIC_ARTERIAL_BLOOD_PRESSURE	2.3755	0.00374075	0.168334	ADAMTS16,PCSK5,ADRA1A,PTPRO,P2RX2
3.AD/1.YC	Immature	Up	GO BP	GOBP_CYTOSOLIC_CALCIUM_ION_TRANSPORT	GOBP_CYTOSOLIC_CALCIUM_ION_TRANSPORT	1.90424	0.0038091	0.170004	PTK2B,ADRA1A,SLC8A2,PLCG2,P2RX2,MCOLN3,JPH1
3.AD/1.YC	Immature	Up	GO BP	GOBP_PROTEIN_KINASE_C_ACTIVATING_G_PROTEIN_COUPLED_RECEPTOR_SIGNALING_PATHWAY	GOBP_PROTEIN_KINASE_C_ACTIVATING_G_PROTEIN_COUPLED_RECEPTOR_SIGNALING_PATHWAY	3.37631	0.00404705	0.178294	PARD3,DGKB,DGKG
3.AD/1.YC	Immature	Up	GO BP	GOBP_NEGATIVE_REGULATION_OF_NEURON_PROJECTION_DEVELOPMENT	GOBP_NEGATIVE_REGULATION_OF_NEURON_PROJECTION_DEVELOPMENT	2.08085	0.00406231	0.178294	EPHA7,NRP1,SEMA3C,DAB1,PTPRO,SEMA5A
3.AD/1.YC	Immature	Up	GO BP	GOBP_CELL_MORPHOGENESIS_INVOLVED_IN_NEURON_DIFFERENTIATION	GOBP_CELL_MORPHOGENESIS_INVOLVED_IN_NEURON_DIFFERENTIATION	1.24975	0.00412581	0.178294	SLIT3,EPHA7,TIAM1,NRP1,PARD3,SEMA3C,DAB1,FLRT3,PTPRO,BCL11B,PPFIA2,NRP2,SEMA5A,PLXNA4,PLPPR4
3.AD/1.YC	Immature	Up	GO BP	GOBP_KIDNEY_EPITHELIUM_DEVELOPMENT	GOBP_KIDNEY_EPITHELIUM_DEVELOPMENT	2.06936	0.00421726	0.180811	ADAMTS16,EPHA7,PTPRO,FAT4,JAG1,CALB1
3.AD/1.YC	Immature	Up	GO BP	GOBP_NEGATIVE_REGULATION_OF_CHEMOTAXIS	GOBP_NEGATIVE_REGULATION_OF_CHEMOTAXIS	2.71278	0.0042666	0.181497	NRP1,SEMA3C,PTPRO,SEMA5A
3.AD/1.YC	Immature	Up	GO BP	GOBP_MESENCHYMAL_CELL_DIFFERENTIATION	GOBP_MESENCHYMAL_CELL_DIFFERENTIATION	1.71633	0.00439583	0.185545	ACVR1,TIAM1,NRP1,SEMA3C,NRP2,SEMA5A,JAG1,ALDH1A2
3.AD/1.YC	Immature	Up	GO BP	GOBP_RESPONSE_TO_INCREASED_OXYGEN_LEVELS	GOBP_RESPONSE_TO_INCREASED_OXYGEN_LEVELS	3.31999	0.00447594	0.187473	PPARG,MT-ATP6,MT-CYB
3.AD/1.YC	Immature	Up	GO BP	GOBP_POSITIVE_REGULATION_OF_OSTEOBLAST_DIFFERENTIATION	GOBP_POSITIVE_REGULATION_OF_OSTEOBLAST_DIFFERENTIATION	2.68573	0.00454185	0.187797	ACVR1,ACVR2A,CCN4,JAG1
3.AD/1.YC	Immature	Up	GO BP	GOBP_CEREBROSPINAL_FLUID_CIRCULATION	GOBP_CEREBROSPINAL_FLUID_CIRCULATION	4.62188	0.00455265	0.187797	CFAP43,DAW1
3.AD/1.YC	Immature	Up	GO BP	GOBP_MESENCHYME_DEVELOPMENT	GOBP_MESENCHYME_DEVELOPMENT	1.55924	0.00518406	0.212235	ZFPM2,ACVR1,TIAM1,NRP1,SEMA3C,NRP2,SEMA5A,JAG1,ALDH1A2
3.AD/1.YC	Immature	Up	GO BP	GOBP_REGULATION_OF_TRANSPORT	GOBP_REGULATION_OF_TRANSPORT	0.836639	0.0052314	0.212574	PTK2B,SHISA6,LEPR,PPARG,CD36,ADRA1A,LRRC7,TIAM1,NRP1,PPFIA2,RAB3B,PCLO,MAOB,CACNB2,MCTP1,KCNJ3,RFX3,PLCG2,OPRD1,P2RX2,NKAIN3,NPY2R,CACNA1E,DAPK1,TMC2,CNIH3,GRIA1,SYT10,KCNJ6,JPH1,SHISA9,STXBP6
3.AD/1.YC	Immature	Up	GO BP	GOBP_NERVOUS_SYSTEM_PROCESS	GOBP_NERVOUS_SYSTEM_PROCESS	0.879397	0.00536187	0.216262	PTK2B,SHISA6,CFAP43,CD36,ADRA1A,GRM1,DAW1,PARD3,CACNB2,OTOF,CHRNA1,SLC8A2,CALB1,CNGB1,OPRD1,P2RX2,NPY2R,EYA4,TMC2,GRIA1,SYT10,SHISA9,GABRQ,NCAM2,GNAL,NPTXR,GPR155
3.AD/1.YC	Immature	Up	GO BP	GOBP_REGULATION_OF_NEUROTRANSMITTER_TRANSPORT	GOBP_REGULATION_OF_NEUROTRANSMITTER_TRANSPORT	2.22773	0.0056319	0.221951	ADRA1A,PPFIA2,RAB3B,CACNB2,MCTP1
3.AD/1.YC	Immature	Up	GO BP	GOBP_FACIAL_NERVE_MORPHOGENESIS	GOBP_FACIAL_NERVE_MORPHOGENESIS	4.428	0.00564761	0.221951	NRP2,PLXNA4
3.AD/1.YC	Immature	Up	GO BP	GOBP_POSITIVE_REGULATION_OF_CELL_CYCLE_CHECKPOINT	GOBP_POSITIVE_REGULATION_OF_CELL_CYCLE_CHECKPOINT	4.428	0.00564761	0.221951	MAP3K20,PROX1
3.AD/1.YC	Immature	Up	GO BP	GOBP_MORPHOGENESIS_OF_A_BRANCHING_STRUCTURE	GOBP_MORPHOGENESIS_OF_A_BRANCHING_STRUCTURE	1.79297	0.00566598	0.221951	ADAMTS16,ACVR1,PROX1,EPHA7,NRP1,SEMA3C,FAT4
3.AD/1.YC	Immature	Up	GO BP	GOBP_MECHANORECEPTOR_DIFFERENTIATION	GOBP_MECHANORECEPTOR_DIFFERENTIATION	2.58232	0.00576214	0.224106	FAT4,JAG1,SLC4A7,MCOLN3
3.AD/1.YC	Immature	Up	GO BP	GOBP_VENTRICULAR_SEPTUM_DEVELOPMENT	GOBP_VENTRICULAR_SEPTUM_DEVELOPMENT	2.55758	0.00609813	0.235492	ZFPM2,SLIT3,ACVR1,PROX1
3.AD/1.YC	Immature	Up	GO BP	GOBP_PHOSPHOLIPASE_C_ACTIVATING_G_PROTEIN_COUPLED_RECEPTOR_SIGNALING_PATHWAY	GOBP_PHOSPHOLIPASE_C_ACTIVATING_G_PROTEIN_COUPLED_RECEPTOR_SIGNALING_PATHWAY	2.18184	0.00638956	0.240958	ADRA1A,GRM1,GNA14,OPRD1,TRHR
3.AD/1.YC	Immature	Up	GO BP	GOBP_OXIDATIVE_PHOSPHORYLATION	GOBP_OXIDATIVE_PHOSPHORYLATION	1.93592	0.00643457	0.240958	MT-ND4,MT-ATP6,MT-ATP8,MT-CYB,MT-ND3,MT-ND4L
3.AD/1.YC	Immature	Up	GO BP	GOBP_POSITIVE_REGULATION_OF_SYNAPTIC_TRANSMISSION	GOBP_POSITIVE_REGULATION_OF_SYNAPTIC_TRANSMISSION	1.93592	0.00643457	0.240958	PTK2B,ADRA1A,CACNB2,SLC8A2,CALB1,CLSTN2
3.AD/1.YC	Immature	Up	GO BP	GOBP_REGULATION_OF_TRANSMEMBRANE_TRANSPORT	GOBP_REGULATION_OF_TRANSMEMBRANE_TRANSPORT	1.21528	0.00644432	0.240958	PTK2B,SHISA6,LRRC7,CACNB2,KCNJ3,PLCG2,CACNA1E,DAPK1,TMC2,CNIH3,GRIA1,KCNJ6,JPH1,SHISA9
3.AD/1.YC	Immature	Up	GO BP	GOBP_LIPID_IMPORT_INTO_CELL	GOBP_LIPID_IMPORT_INTO_CELL	3.11295	0.00646094	0.240958	SLC27A2,CD36,GRM1
3.AD/1.YC	Immature	Up	GO BP	GOBP_TISSUE_MORPHOGENESIS	GOBP_TISSUE_MORPHOGENESIS	1.1349	0.00671521	0.247019	ADAMTS16,ZFPM2,ACVR1,PROX1,EPHA7,TIAM1,NRP1,SEMA3C,FLRT3,ITGA8,NRP2,FAT4,JAG1,ALDH1A2,MLLT3
3.AD/1.YC	Immature	Up	GO BP	GOBP_CELL_GROWTH	GOBP_CELL_GROWTH	1.26621	0.00673561	0.247019	PTK2B,PPARG,SLIT3,ADRA1A,EPHA7,TIAM1,NRP1,SEMA3C,FLRT3,NRP2,SEMA5A,PLXNA4
3.AD/1.YC	Immature	Up	GO BP	GOBP_ENDOCARDIUM_DEVELOPMENT	GOBP_ENDOCARDIUM_DEVELOPMENT	4.2584	0.00685029	0.247019	ACVR1,PROX1
3.AD/1.YC	Immature	Up	GO BP	GOBP_INOSITOL_TRISPHOSPHATE_METABOLIC_PROCESS	GOBP_INOSITOL_TRISPHOSPHATE_METABOLIC_PROCESS	4.2584	0.00685029	0.247019	PTK2B,PLCG2
3.AD/1.YC	Immature	Up	GO BP	GOBP_CARDIAC_NEURAL_CREST_CELL_DIFFERENTIATION_INVOLVED_IN_HEART_DEVELOPMENT	GOBP_CARDIAC_NEURAL_CREST_CELL_DIFFERENTIATION_INVOLVED_IN_HEART_DEVELOPMENT	4.2584	0.00685029	0.247019	SEMA3C,JAG1
3.AD/1.YC	Immature	Down	GO BP	GOBP_COTRANSLATIONAL_PROTEIN_TARGETING_TO_MEMBRANE	GOBP_COTRANSLATIONAL_PROTEIN_TARGETING_TO_MEMBRANE	4.29414	9.81588e-46	5.34475e-42	RPL29,RPS6,RPL3,RPL5,RPL6,RPL10,RPL11,RPL23A,RPL24,RPL38,RPSA,RPS10,RPS14,RPS15,RPS19,RPS27,RPL26,RPS27A,UBA52,RPL23,RPS3,RPL35,RPL13A,RPL10A,RPL7,RPL7A,RPL8,RPL9,RPL12,RPL13,RPL15,RPL17,RPL18A,RPL19,RPL21,RPL27,RPL30,RPL27A,RPL28,RPL31,RPL32,RPL34,RPL35A,RPL37,RPL41,RPL36A,RPLP2,RPS2,RPS3A,RPS4X,RPS7,RPS9,RPS11,RPS12,RPS13,RPS16,RPS17,RPS18,RPS20,RPS21,RPS23,RPS24,RPS25,RPS26,RPS29,RPL14,SRP14,B…
3.AD/1.YC	Immature	Down	GO BP	GOBP_ESTABLISHMENT_OF_PROTEIN_LOCALIZATION_TO_ENDOPLASMIC_RETICULUM	GOBP_ESTABLISHMENT_OF_PROTEIN_LOCALIZATION_TO_ENDOPLASMIC_RETICULUM	3.89969	1.29812e-42	3.53412e-39	HSPA5,RPL29,RPS6,RPL3,RPL5,RPL6,RPL10,RPL11,RPL23A,RPL24,RPL38,RPSA,RPS10,RPS14,RPS15,RPS19,RPS27,RPL26,RPS27A,UBA52,RPL23,RPS3,RPL35,RPL13A,RPL10A,RPL7,RPL7A,RPL8,RPL9,RPL12,RPL13,RPL15,RPL17,RPL18A,RPL19,RPL21,RPL27,RPL30,RPL27A,RPL28,RPL31,RPL32,RPL34,RPL35A,RPL37,RPL41,RPL36A,RPLP2,RPS2,RPS3A,RPS4X,RPS7,RPS9,RPS11,RPS12,RPS13,RPS16,RPS17,RPS18,RPS20,RPS21,RPS23,RPS24,RPS25,RPS26,RPS29,RPL14,S…
3.AD/1.YC	Immature	Down	GO BP	GOBP_PROTEIN_LOCALIZATION_TO_ENDOPLASMIC_RETICULUM	GOBP_PROTEIN_LOCALIZATION_TO_ENDOPLASMIC_RETICULUM	3.43498	1.83975e-39	3.33914e-36	LRRK2,GJA1,HSPA5,RPL29,RPS6,RPL3,RPL5,RPL6,RPL10,RPL11,RPL23A,RPL24,RPL38,RPSA,RPS10,RPS14,RPS15,RPS19,RPS27,RPL26,RPS27A,UBA52,RPL23,RPS3,RPL35,RPL13A,RPL10A,RPL7,RPL7A,RPL8,RPL9,RPL12,RPL13,RPL15,RPL17,RPL18A,RPL19,RPL21,RPL27,RPL30,RPL27A,RPL28,RPL31,RPL32,RPL34,RPL35A,RPL37,RPL41,RPL36A,RPLP2,RPS2,RPS3A,RPS4X,RPS7,RPS9,RPS11,RPS12,RPS13,RPS16,RPS17,RPS18,RPS20,RPS21,RPS23,RPS24,RPS25,RPS26,RP…
3.AD/1.YC	Immature	Down	GO BP	GOBP_NUCLEAR_TRANSCRIBED_MRNA_CATABOLIC_PROCESS_NONSENSE_MEDIATED_DECAY	GOBP_NUCLEAR_TRANSCRIBED_MRNA_CATABOLIC_PROCESS_NONSENSE_MEDIATED_DECAY	3.53631	3.07963e-35	4.19215e-32	RPL29,RPS6,RPL3,RPL5,RPL6,RPL10,RPL11,RPL23A,RPL24,RPL38,RPSA,RPS10,RPS14,RPS15,RPS19,RPS27,RPL26,RPS27A,UBA52,RPL23,RPS3,RPL35,RPL13A,RPL10A,RPL7,RPL7A,RPL8,RPL9,RPL12,RPL13,RPL15,RPL17,RPL18A,RPL19,RPL21,RPL27,RPL30,RPL27A,RPL28,RPL31,RPL32,RPL34,RPL35A,RPL37,RPL41,RPL36A,RPLP2,RPS2,RPS3A,RPS4X,RPS7,RPS9,RPS11,RPS12,RPS13,RPS16,RPS17,RPS18,RPS20,RPS21,RPS23,RPS24,RPS25,RPS26,RPS29,RPL14
3.AD/1.YC	Immature	Down	GO BP	GOBP_PROTEIN_TARGETING_TO_MEMBRANE	GOBP_PROTEIN_TARGETING_TO_MEMBRANE	2.68197	8.8379e-31	9.62447e-28	HSPA5,RPL29,RPS6,RPL3,RPL5,RPL6,RPL10,RPL11,RPL23A,RPL24,RPL38,RPSA,RPS10,RPS14,RPS15,RPS19,RPS27,RPL26,RPS27A,UBA52,RPL23,HRAS,PAK1,RPS3,ITGB1BP1,RPL35,RPL13A,RPL10A,RPL7,RPL7A,RPL8,RPL9,RPL12,RPL13,RPL15,RPL17,RPL18A,RPL19,RPL21,RPL27,RPL30,RPL27A,RPL28,RPL31,RPL32,RPL34,RPL35A,RPL37,RPL41,RPL36A,RPLP2,RPS2,RPS3A,RPS4X,RPS7,RPS9,RPS11,RPS12,RPS13,RPS16,RPS17,RPS18,RPS20,RPS21,RPS23,RPS24,RPS25,…
3.AD/1.YC	Immature	Down	GO BP	GOBP_ESTABLISHMENT_OF_PROTEIN_LOCALIZATION_TO_MEMBRANE	GOBP_ESTABLISHMENT_OF_PROTEIN_LOCALIZATION_TO_MEMBRANE	2.06669	5.55732e-27	5.04327e-24	EGFR,NECTIN3,HSPA5,RPL29,RPS6,RPL3,RPL5,RPL6,RPL10,RPL11,RPL23A,RPL24,RPL38,RPSA,RPS10,RPS14,RPS15,RPS19,RPS27,RPL26,RPS27A,UBA52,RPL23,HRAS,PAK1,RPS3,YWHAB,ITGB1BP1,RPL35,RPL13A,RPL10A,RPL7,RPL7A,RPL8,RPL9,RPL12,RPL13,RPL15,RPL17,RPL18A,RPL19,RPL21,RPL27,RPL30,RPL27A,RPL28,RPL31,RPL32,RPL34,RPL35A,RPL37,RPL41,RPL36A,RPLP2,RPS2,RPS3A,RPS4X,RPS7,RPS9,RPS11,RPS12,RPS13,RPS16,RPS17,RPS18,RPS20,RPS21…
3.AD/1.YC	Immature	Down	GO BP	GOBP_VIRAL_GENE_EXPRESSION	GOBP_VIRAL_GENE_EXPRESSION	2.53488	2.71549e-26	2.11226e-23	RPL29,RPS6,RPL3,RPL5,RPL6,RPL10,RPL11,RPL23A,RPL24,RPL38,RPSA,RPS10,RPS14,RPS15,RPS19,RPS27,RPL26,REST,RPS27A,UBA52,RPL23,MDFIC,PSMC3,RPS3,RPL35,RPL13A,RPL10A,RPL7,RPL7A,RPL8,RPL9,RPL12,RPL13,RPL15,RPL17,RPL18A,RPL19,RPL21,RPL27,RPL30,RPL27A,RPL28,RPL31,RPL32,RPL34,RPL35A,RPL37,RPL41,RPL36A,RPLP2,RPS2,RPS3A,RPS4X,RPS7,RPS9,RPS11,RPS12,RPS13,RPS16,RPS17,RPS18,RPS20,RPS21,RPS23,RPS24,RPS25,RPS26,RP…
3.AD/1.YC	Immature	Down	GO BP	GOBP_TRANSLATIONAL_INITIATION	GOBP_TRANSLATIONAL_INITIATION	2.52994	1.40868e-25	9.58785e-23	RPL29,RPS6,EIF2B2,RPL3,RPL5,RPL6,RPL10,RPL11,RPL23A,RPL24,RPL38,RPSA,RPS10,RPS14,RPS15,RPS19,RPS27,RPL26,RPS27A,UBA52,RPL23,RPS3,RPL35,RPL13A,RPL10A,RPL7,RPL7A,RPL8,RPL9,RPL12,RPL13,RPL15,RPL17,RPL18A,RPL19,RPL21,RPL27,RPL30,RPL27A,RPL28,RPL31,RPL32,RPL34,RPL35A,RPL37,RPL41,RPL36A,RPLP2,RPS2,RPS3A,RPS4X,RPS7,RPS9,RPS11,RPS12,RPS13,RPS16,RPS17,RPS18,RPS20,RPS21,RPS23,RPS24,RPS25,RPS26,RPS29,RPL14,…
3.AD/1.YC	Immature	Down	GO BP	GOBP_PROTEIN_TARGETING	GOBP_PROTEIN_TARGETING	1.7816	2.16171e-23	1.30783e-20	LRRK2,DNAJC19,HSPA5,RPL29,RPS6,UBB,RPL3,RPL5,RPL6,RPL10,RPL11,RPL23A,RPL24,RPL38,RPSA,RPS10,RPS14,RPS15,RPS19,RPS27,PEX2,RPL26,RPS27A,SREBF1,UBA52,UBC,RPL23,BAG3,HRAS,PAK1,RPS3,PINK1,YWHAB,ITGB1BP1,RPL35,RPL13A,RPL10A,RPL7,RPL7A,RPL8,RPL9,RPL12,RPL13,RPL15,RPL17,RPL18A,RPL19,RPL21,RPL27,RPL30,RPL27A,RPL28,RPL31,RPL32,RPL34,RPL35A,RPL37,RPL41,RPL36A,RPLP2,RPS2,RPS3A,RPS4X,RPS7,RPS9,RPS11,RPS12,RPS…
3.AD/1.YC	Immature	Down	GO BP	GOBP_NUCLEAR_TRANSCRIBED_MRNA_CATABOLIC_PROCESS	GOBP_NUCLEAR_TRANSCRIBED_MRNA_CATABOLIC_PROCESS	2.27387	2.58483e-21	1.27949e-18	RPL29,RPS6,ZFP36L1,RPL3,RPL5,RPL6,RPL10,RPL11,RPL23A,RPL24,RPL38,RPSA,RPS10,RPS14,RPS15,RPS19,RPS27,RPL26,RPS27A,UBA52,RPL23,RPS3,ZFP36L2,RPL35,RPL13A,RPL10A,RPL7,RPL7A,RPL8,RPL9,RPL12,RPL13,RPL15,RPL17,RPL18A,RPL19,RPL21,RPL27,RPL30,RPL27A,RPL28,RPL31,RPL32,RPL34,RPL35A,RPL37,RPL41,RPL36A,RPLP2,RPS2,RPS3A,RPS4X,RPS7,RPS9,RPS11,RPS12,RPS13,RPS16,RPS17,RPS18,RPS20,RPS21,RPS23,RPS24,RPS25,RPS26,RPS…
3.AD/1.YC	Immature	Down	GO BP	GOBP_PROTEIN_LOCALIZATION_TO_MEMBRANE	GOBP_PROTEIN_LOCALIZATION_TO_MEMBRANE	1.4183	8.31272e-20	3.7719e-17	DLG1,EGFR,FLNA,NECTIN3,HSPA5,TESC,PTN,RPL29,RPS6,TGFB1,RPL3,RPL5,RPL6,RPL10,RPL11,RPL23A,RPL24,RPL38,RPSA,RPS10,RPS14,RPS15,RPS19,RPS27,BCL2L1,RPL26,RPS27A,UBA52,EZR,RPL23,FERMT2,HRAS,APOE,PAK1,RPS3,TPBG,YWHAB,ITGB1BP1,SLC9A3R1,RPL35,RPL13A,RPL10A,RPL7,RPL7A,RPL8,RPL9,RPL12,RPL13,RPL15,RPL17,RPL18A,RPL19,RPL21,RPL27,RPL30,RPL27A,RPL28,RPL31,RPL32,RPL34,RPL35A,RPL37,RPL41,RPL36A,RPLP2,RPS2,RPS3A,R…
3.AD/1.YC	Immature	Down	GO BP	GOBP_ORGANONITROGEN_COMPOUND_BIOSYNTHETIC_PROCESS	GOBP_ORGANONITROGEN_COMPOUND_BIOSYNTHETIC_PROCESS	0.971005	9.60269e-19	3.73476e-16	ADCY7,PARK7,AZIN2,DCN,EGFR,DDX25,IGF1,INHBA,ITGA2,PDGFRB,RPL29,RPS6,BMPR1B,ZFP36L1,TGFB2,CALR,EIF2B2,QKI,TGFB1,RPL3,RPL5,RPL6,RPL10,RPL11,RPL23A,RPL24,RPL38,RPSA,RPS27L,MRPS7,RPS10,RPS14,RPS15,RPS19,RPS27,ACSBG1,HACD4,ELOVL6,TECR,MT3,ATP6V0C,TMEM165,CPS1,ASS1,RPL26,SOX4,MTAP,MTRR,AASS,FOXO3,PAWR,PPM1A,RPS27A,TCF7L2,UBA52,PARP9,PER2,IL33,RPL23,PPM1L,EGF,GCNT2,ANGPT1,GPR37,GSTP1,APOE,RPS3,PINK1,ZFP…
3.AD/1.YC	Immature	Down	GO BP	GOBP_NEUROGENESIS	GOBP_NEUROGENESIS	0.939057	5.24846e-17	1.78612e-14	MEF2A,SEMA3A,IFT27,ADCYAP1,LRRK2,CNR1,CTNNA1,EDNRB,EGFR,ETV5,ETV6,FGFR2,FLNA,GJA1,GLI3,HEXB,SOX8,HSPA5,HSP90AB1,TNC,INHBA,KIT,LRP2,NOTCH1,SERPINE2,PLAG1,CHD7,PTN,ROBO2,BMP7,BMPR1B,SOD1,SOX9,SPP1,NR2F2,TGFB2,TGFBR1,THRB,C3,UBB,VEGFA,WNT3,DDR1,CALR,EIF2B2,CD9,ADGRG1,CD38,TGFB1,RPL24,SLC39A12,MT3,B2M,SOX4,ID2,HDAC5,OLIG2,YAP1,CUX1,SATB2,CUX2,HIPK2,ZFHX3,PRRX1,RARB,REST,SOX2,SOX10,EZR,NKX6-2,BHLHE40,…
3.AD/1.YC	Immature	Down	GO BP	GOBP_REGULATION_OF_CELLULAR_COMPONENT_MOVEMENT	GOBP_REGULATION_OF_CELLULAR_COMPONENT_MOVEMENT	1.11636	6.92491e-17	2.21801e-14	SEMA3A,CTNNA1,DCN,DLG1,EGFR,ETS1,FLNA,SULF1,CLIC4,GJA1,HSPA5,IGF1,ITGA2,KIT,KITLG,NOTCH1,PDGFRA,PDGFRB,SERPINE2,PTN,BMP7,SOX9,TAC1,NR2F2,TGFB2,TGFBR1,TGFBR2,VEGFA,CALR,ADAM15,CD9,ADGRG1,HDAC4,PTPRC,TGFB1,RPS19,TF,GADD45A,RGCC,NOX4,HDAC5,FOXO3,MITF,SP100,IL33,FERMT2,DUSP10,CSF1R,CTSH,SH3RF2,DDT,BMPER,AGT,LPAR1,EGF,ERBB3,ERBB4,FGF1,FGF2,FLT1,SASH1,GCNT2,ANGPT1,GSTP1,HRAS,APOE,LYN,MAP3K3,MET,MIF,PAK…
3.AD/1.YC	Immature	Down	GO BP	GOBP_CELL_MIGRATION	GOBP_CELL_MIGRATION	0.960606	7.73385e-17	2.33949e-14	SEMA3A,MERTK,LRRK2,CTNNA1,DCN,EDNRB,EGFR,ETS1,FLNA,SULF1,CLIC4,GJA1,GLI3,HEXB,SOX8,HSPA5,IGF1,ITGA2,KIT,KITLG,NOTCH1,PDGFRA,PDGFRB,SERPINE2,PTN,BMP7,SOX9,TAC1,NR2F2,TGFB2,TGFBR1,TGFBR2,VEGFA,DDR1,CALR,ARID5B,ADAM15,CD9,ADGRG1,HDAC4,PTPRC,TGFB1,RPS19,TRPM2,GADD45A,RGCC,NOX4,HDAC5,FOXO3,SATB2,MITF,SOX10,SP100,PARP9,IL33,NDE1,FERMT2,DUSP10,CSF1R,CTSH,SH3RF2,DDT,BMPER,AGT,LPAR1,EGF,EPHB1,ERBB4,FGF1,F…
3.AD/1.YC	Immature	Down	GO BP	GOBP_ESTABLISHMENT_OF_PROTEIN_LOCALIZATION_TO_ORGANELLE	GOBP_ESTABLISHMENT_OF_PROTEIN_LOCALIZATION_TO_ORGANELLE	1.37485	1.78088e-16	5.10362e-14	LRRK2,DNAJC19,CCT5,FLNA,GLI3,HSPA5,HSP90AB1,RPL29,RPS6,UBB,TGFB1,RPL3,RPL5,RPL6,RPL10,RPL11,RPL23A,RPL24,RPL38,RPSA,RPS10,RPS14,RPS15,RPS19,RPS27,PEX2,RPL26,TXNIP,RPS27A,SREBF1,UBA52,UBC,RPL23,BAG3,ANGPT1,MDFIC,RPS3,PINK1,SYK,YWHAB,RPL35,RPL13A,RPL10A,RPL7,RPL7A,RPL8,RPL9,RPL12,RPL13,RPL15,RPL17,RPL18A,RPL19,RPL21,RPL27,RPL30,RPL27A,RPL28,RPL31,RPL32,RPL34,RPL35A,RPL37,RPL41,RPL36A,RPLP2,RPS2,RPS…
3.AD/1.YC	Immature	Down	GO BP	GOBP_BIOLOGICAL_ADHESION	GOBP_BIOLOGICAL_ADHESION	0.908976	7.86075e-15	2.14009e-12	TESK2,MERTK,COL16A1,CTNNA1,DLG1,EGFR,ETS1,FLNA,NECTIN3,GLI3,HSP90AB1,TNC,IGF1,IGFBP7,ITGA2,KIT,MFGE8,KITLG,NOTCH1,CLDN11,PDGFRA,SERPINE2,TESC,PTN,ROBO2,BMP7,SOX9,SPP1,ZFP36L1,TGFB2,TGFBR2,VEGFA,DDR1,CALR,ADAM19,ADAM15,CD9,ADGRG1,PTPRC,TGFB1,RPSA,TTYH1,ASS1,RGCC,SOX4,ZFHX3,PAWR,SOX2,EZR,SOX13,SH2B3,FERMT2,DUSP10,MAP3K8,EPHB1,ERBB3,NPNT,GCNT2,ANGPT1,RELL2,IL18,ITPKB,LYN,MBP,PAK1,PPIA,SEMA6A,JCAD,RP…
3.AD/1.YC	Immature	Down	GO BP	GOBP_LOCOMOTION	GOBP_LOCOMOTION	0.82427	1.40885e-14	3.65294e-12	SEMA3A,MERTK,LRRK2,CTNNA1,SLC9B1,DCN,EDNRB,EGFR,ETS1,FLNA,SULF1,CLIC4,GJA1,GLI3,HEXB,SOX8,HSPA5,IGF1,ITGA2,KIT,KITLG,NOTCH1,PDGFRA,PDGFRB,SERPINE2,TTC12,PTN,ROBO2,BMP7,BMPR1B,SOX9,TAC1,NR2F2,TGFB2,TGFBR1,TGFBR2,VEGFA,WNT3,DDR1,CALR,ARID5B,ADAM15,CD9,ADGRG1,IGSF8,HDAC4,PTPRC,TGFB1,RPL24,RPS19,TF,TRPM2,GADD45A,RGCC,NOX4,HDAC5,FOXO3,SATB2,MITF,SOX10,SP100,EZR,PARP9,KLF7,IL33,NDE1,FERMT2,DUSP10,CSF1R…
3.AD/1.YC	Immature	Down	GO BP	GOBP_NEGATIVE_REGULATION_OF_RESPONSE_TO_STIMULUS	GOBP_NEGATIVE_REGULATION_OF_RESPONSE_TO_STIMULUS	0.86545	2.60454e-14	6.44624e-12	SEMA3A,PARK7,ADCYAP1,LRRK2,CRHBP,CTNNA1,DCN,DLG1,EGFR,PSME4,SULF1,GJA1,GLI3,HSPA5,IGF1,LRP2,NOTCH1,PDGFRA,SERPINE2,HTRA1,PLEKHA1,ROBO2,BMP7,SOD1,SOX9,SPP1,STK3,TGFB2,TGFBR1,TGFBR2,UBB,WNT3,CALR,CD9,PTPRC,TGFB1,HELB,RPS19,DDAH1,BCL2L1,YAP1,WWP2,EID2,HIPK2,PAWR,WWOX,PPM1A,HIF1AN,PSMD10,RBL1,RPS27A,PRDM16,SOX2,SOX10,STAT1,TCF7L2,UBA52,UBC,EZR,KLF7,MLIP,IL33,SOX13,NR1D2,SH2B3,IRAK3,DUSP10,SH3RF2,CNKS…
3.AD/1.YC	Immature	Down	GO BP	GOBP_OXIDATIVE_PHOSPHORYLATION	GOBP_OXIDATIVE_PHOSPHORYLATION	2.14817	1.46427e-13	3.46651e-11	PARK7,PINK1,BID,ATP5F1B,ATP5F1A,NDUFA2,NDUFC2,GHITM,COX7A1,TAZ,NDUFAB1,ATP5MG,UQCR11,NDUFA11,COX4I1,COX5B,COX6A1,COX6B1,COX6C,COX7B,COX7C,COX8A,UQCR10,NDUFS7,NDUFA3,NDUFA4,NDUFA5,NDUFB3,NDUFB4,NDUFB7,NDUFB8,NDUFB9,NDUFS5,NDUFS6,ATP5F1C,NDUFA13,ATP5F1D,ATP5F1E,ATP5MC1,ATP5MC3,ATP5ME,ATP5PF,NDUFB11,UQCRB,UQCRH,COX5A
3.AD/1.YC	Immature	Down	GO BP	GOBP_CENTRAL_NERVOUS_SYSTEM_DEVELOPMENT	GOBP_CENTRAL_NERVOUS_SYSTEM_DEVELOPMENT	0.991789	6.70714e-13	1.52168e-10	SEMA3A,ADCYAP1,LRRK2,CRH,SPATA5,EGFR,ETS1,FGFR2,FLNA,GLI3,SOX8,HMGCS1,HSPA5,HSP90AB1,INHBA,LRP2,NOTCH1,SERPINE2,CHD7,PTN,ROBO2,SLC2A1,BMP7,SOX9,STK3,NR2F2,TGFBR2,C3,UBB,WNT3,KDM2B,DYNLL1,EIF2B2,ADGRG1,TGFB1,MT3,B2M,SOX4,OLIG2,SATB2,JARID2,MEIS2,ZFHX3,RARB,SOX2,SOX10,NKX6-2,FOXP2,BAG3,SOX13,NDE1,ATP6AP2,DUSP10,CSF1R,LPAR1,EGF,EPHB1,ERBB4,ALK,GSTP1,LYN,MBP,NEFL,NTRK2,PAK1,SHC3,SEMA4C,NDRG2,RGS4,TIM…
3.AD/1.YC	Immature	Down	GO BP	GOBP_GLIOGENESIS	GOBP_GLIOGENESIS	1.62782	8.30338e-13	1.80848e-10	ADCYAP1,EGFR,ETV5,GLI3,HEXB,SOX8,LRP2,NOTCH1,SERPINE2,PLAG1,PTN,SOD1,SOX9,TGFB2,EIF2B2,CD9,ADGRG1,TGFB1,MT3,SOX4,OLIG2,SOX2,SOX10,NKX6-2,IL33,SOX13,DUSP10,CSF1R,LPAR1,ERBB3,GSTP1,LYN,NTRK2,TLR4,GPR37L1,CNP,SYNE2,SRGAP2,CSPG5,CLU,GAP43,LAMA2,MAG,POU3F2,RELN,SOX6,IL6ST,KCNJ10,GRN,P2RY12,PLP1,GSN,IFNGR1,NDRG1,BACE2,CX3CR1,ATP1B2,VIM,GPR17,IDH2,ASPA,FA2H,MYRF,SH3TC2,DAAM2,MOBP,OLIG1,OPALIN
3.AD/1.YC	Immature	Down	GO BP	GOBP_ATP_SYNTHESIS_COUPLED_ELECTRON_TRANSPORT	GOBP_ATP_SYNTHESIS_COUPLED_ELECTRON_TRANSPORT	2.41646	2.01281e-12	4.21529e-10	PARK7,PINK1,BID,NDUFA2,NDUFC2,GHITM,TAZ,NDUFAB1,UQCR11,NDUFA11,COX4I1,COX5B,COX6A1,COX6B1,COX6C,COX7B,COX7C,COX8A,UQCR10,NDUFS7,NDUFA3,NDUFA4,NDUFA5,NDUFB3,NDUFB4,NDUFB7,NDUFB8,NDUFB9,NDUFS5,NDUFS6,NDUFA13,NDUFB11,UQCRB,UQCRH,COX5A
3.AD/1.YC	Immature	Down	GO BP	GOBP_RNA_CATABOLIC_PROCESS	GOBP_RNA_CATABOLIC_PROCESS	1.35612	2.15265e-12	4.34118e-10	PSME4,RPL29,RPS6,ZFP36L1,UBB,VIP,RPL3,RPL5,RPL6,RPL10,RPL11,RPL23A,RPL24,RPL38,RPSA,RPS10,RPS14,RPS15,RPS19,RPS27,RPL26,PSMD10,RPS27A,UBA52,UBC,RPL23,PSMB6,PSMC3,PSMC5,RPS3,ZFP36L2,YWHAB,RPL35,RPL13A,RPL10A,RPL7,RPL7A,RPL8,RPL9,RPL12,RPL13,RPL15,RPL17,RPL18A,RPL19,RPL21,RPL27,RPL30,RPL27A,RPL28,RPL31,RPL32,RPL34,RPL35A,RPL37,RPL41,RPL36A,RPLP2,RPS2,RPS3A,RPS4X,RPS7,RPS9,RPS11,RPS12,RPS13,RPS16,RP…
3.AD/1.YC	Immature	Down	GO BP	GOBP_NEGATIVE_REGULATION_OF_SIGNALING	GOBP_NEGATIVE_REGULATION_OF_SIGNALING	0.854763	2.47387e-12	4.81079e-10	PARK7,LRRK2,CRH,CRHBP,CTNNA1,DCN,DLG1,EGFR,PSME4,SULF1,GJA1,GLI3,HSPA5,IGF1,INHBA,LRP2,NOTCH1,SERPINE2,HTRA1,PLEKHA1,BMP7,SOX9,STK3,TGFB2,TGFBR1,TGFBR2,UBB,CALR,CD38,PTPRC,TGFB1,BCL2L1,YAP1,WWP2,EID2,HIPK2,PAWR,WWOX,PPM1A,HIF1AN,PSMD10,REST,RPS27A,PRDM16,SOX2,SOX10,SREBF1,STAT1,TCF7L2,UBA52,UBC,EZR,KLF7,SOX13,SH2B3,IRAK3,DUSP10,SH3RF2,CNKSR3,BMPER,AGT,DUSP6,LPAR1,EGF,SPRED2,ERBB3,FGF2,PHLPP1,GSTP…
3.AD/1.YC	Immature	Down	GO BP	GOBP_CELLULAR_AMIDE_METABOLIC_PROCESS	GOBP_CELLULAR_AMIDE_METABOLIC_PROCESS	0.928949	3.21259e-12	6.03192e-10	GNPDA1,PARK7,EGFR,DDX25,HEXB,HMGCS1,IGF1,ITGA2,RPL29,RPS6,SOD1,ZFP36L1,CALR,EIF2B2,QKI,RPL3,RPL5,RPL6,RPL10,RPL11,RPL23A,RPL24,RPL38,RPSA,RPS27L,MRPS7,RPS10,RPS14,RPS15,RPS19,RPS27,ACSBG1,ELOVL6,TECR,CPS1,ASS1,RPL26,SOX4,MTRR,AASS,FOXO3,RPS27A,UBA52,PER2,RPL23,ATP6AP2,CTSH,GSTP1,APOE,NTRK2,RPS3,PINK1,ZFP36L2,RPL35,RPL13A,RPL10A,RPL7,RPL7A,RPL8,RPL9,RPL12,RPL13,RPL15,RPL17,RPL18A,RPL19,RPL21,RPL27…
3.AD/1.YC	Immature	Down	GO BP	GOBP_ENZYME_LINKED_RECEPTOR_PROTEIN_SIGNALING_PATHWAY	GOBP_ENZYME_LINKED_RECEPTOR_PROTEIN_SIGNALING_PATHWAY	0.940752	3.37909e-12	6.13305e-10	MERTK,DCN,EGFR,FGFR2,SULF1,FOS,HSPA5,HSP90AB1,IGF1,INHBA,KIT,LRP2,NOTCH1,PDGFRA,PDGFRB,HTRA1,PTN,PLEKHA1,BMP7,BMPR1B,SOX9,TGFB2,TGFBR1,TGFBR2,UBB,VEGFA,DDR1,ARID5B,TGFB1,MT3,ATP6V1D,ATP6V0C,ATP6V0B,ATP6AP1,TF,ATP6V1F,TXNIP,EID2,FRK,HIPK2,HIVEP1,PPM1A,RPS27A,PRDM16,SREBF1,UBA52,UBC,CCND3,ACVR2B,SH2B3,FERMT2,CSF1R,PPM1L,BMPER,AGT,EGF,SPRED2,EPHB1,ERBB3,ERBB4,FGF1,FGF2,FGFR3,FLT1,ALK,GCNT2,GFRA1,ANG…
3.AD/1.YC	Immature	Down	GO BP	GOBP_RESPIRATORY_ELECTRON_TRANSPORT_CHAIN	GOBP_RESPIRATORY_ELECTRON_TRANSPORT_CHAIN	2.23844	4.1284e-12	7.25134e-10	PARK7,PINK1,BID,NDUFA2,NDUFC2,GHITM,TAZ,SLC25A13,SLC25A18,ETFB,NDUFAB1,UQCR11,NDUFA11,COX4I1,COX5B,COX6A1,COX6B1,COX6C,COX7B,COX7C,COX8A,UQCR10,NDUFS7,NDUFA3,NDUFA4,NDUFA5,NDUFB3,NDUFB4,NDUFB7,NDUFB8,NDUFB9,NDUFS5,NDUFS6,NDUFA13,NDUFB11,UQCRB,UQCRH,COX5A
3.AD/1.YC	Immature	Down	GO BP	GOBP_ORGANIC_CYCLIC_COMPOUND_CATABOLIC_PROCESS	GOBP_ORGANIC_CYCLIC_COMPOUND_CATABOLIC_PROCESS	1.13054	4.87202e-12	8.29004e-10	PSME4,RPL29,RPS6,SPP1,ZFP36L1,UBB,VIP,RPL3,RPL5,RPL6,RPL10,RPL11,RPL23A,RPL24,RPL38,RPSA,RPS10,RPS14,RPS15,RPS19,RPS27,MT3,RPL26,PSMD10,RPS27A,UBA52,UBC,RPL23,APOE,PDE8A,PSMB6,PSMC3,PSMC5,RPS3,ZFP36L2,YWHAB,RPL35,RPL13A,RPL10A,RPL7,RPL7A,RPL8,RPL9,RPL12,RPL13,RPL15,RPL17,RPL18A,RPL19,RPL21,RPL27,RPL30,RPL27A,RPL28,RPL31,RPL32,RPL34,RPL35A,RPL37,RPL41,RPL36A,RPLP2,RPS2,RPS3A,RPS4X,RPS7,RPS9,RPS11,…
3.AD/1.YC	Immature	Down	GO BP	GOBP_NEURON_DIFFERENTIATION	GOBP_NEURON_DIFFERENTIATION	0.834037	8.7426e-12	1.44253e-09	MEF2A,SEMA3A,IFT27,ADCYAP1,LRRK2,CNR1,CTNNA1,EDNRB,EGFR,ETV5,FGFR2,FLNA,GJA1,GLI3,SOX8,HSPA5,HSP90AB1,TNC,INHBA,LRP2,NOTCH1,PTN,ROBO2,BMP7,BMPR1B,SOD1,SOX9,SPP1,TGFB2,TGFBR1,THRB,C3,UBB,VEGFA,WNT3,DDR1,CALR,CD38,RPL24,SLC39A12,MT3,B2M,SOX4,ID2,HDAC5,OLIG2,CUX1,SATB2,CUX2,HIPK2,ZFHX3,PRRX1,RARB,REST,SOX2,EZR,KLF7,CSF1R,LPAR1,EPHB1,ERBB4,ALK,GFRA1,APOE,LYN,MET,NEFL,NTRK2,PAK1,SHC3,SEMA4C,DOK5,SEMA6…
3.AD/1.YC	Immature	Down	GO BP	GOBP_AMIDE_BIOSYNTHETIC_PROCESS	GOBP_AMIDE_BIOSYNTHETIC_PROCESS	1.02543	1.45068e-11	2.32322e-09	EGFR,DDX25,ITGA2,RPL29,RPS6,ZFP36L1,CALR,EIF2B2,QKI,RPL3,RPL5,RPL6,RPL10,RPL11,RPL23A,RPL24,RPL38,RPSA,RPS27L,MRPS7,RPS10,RPS14,RPS15,RPS19,RPS27,ACSBG1,ELOVL6,TECR,CPS1,ASS1,RPL26,SOX4,FOXO3,RPS27A,UBA52,PER2,RPL23,RPS3,PINK1,ZFP36L2,RPL35,RPL13A,RPL10A,RPL7,RPL7A,RPL8,RPL9,RPL12,RPL13,RPL15,RPL17,RPL18A,RPL19,RPL21,RPL27,RPL30,RPL27A,RPL28,RPL31,RPL32,RPL34,RPL35A,RPL37,RPL41,RPL36A,RPLP2,RPS2,…
3.AD/1.YC	Immature	Down	GO BP	GOBP_POSITIVE_REGULATION_OF_MULTICELLULAR_ORGANISMAL_PROCESS	GOBP_POSITIVE_REGULATION_OF_MULTICELLULAR_ORGANISMAL_PROCESS	0.822565	1.99075e-11	3.09703e-09	MEF2A,SEMA3A,UNC13B,PARK7,ADCYAP1,CNR1,CRH,EDNRB,EGFR,EPAS1,ETS1,ETV5,FGFR2,SULF1,FOS,GJA1,GLI3,SOX8,IGF1,INHBA,ITGA2,KIT,LRP2,KITLG,NOTCH1,SERPINE2,PLAG1,TESC,CHD7,PTN,ROBO2,BMP7,BMPR1B,SOD1,SOX9,ZFP36L1,TAC1,TGFB2,TGFBR1,TGFBR2,C3,TRPC3,VEGFA,VIP,WNT3,KDM2B,CD38,HDAC4,PTPRC,TGFB1,RPS19,ELOVL6,SLC39A12,ATP6AP1,B2M,DDAH1,RGCC,SOX4,OLIG2,YAP1,CUX1,FOXO3,CUX2,HIPK2,REST,PRDM16,SOX10,STAT1,TCF7L2,EZ…
3.AD/1.YC	Immature	Down	GO BP	GOBP_AMEBOIDAL_TYPE_CELL_MIGRATION	GOBP_AMEBOIDAL_TYPE_CELL_MIGRATION	1.31737	2.34663e-11	3.54928e-09	SEMA3A,DCN,EDNRB,ETS1,GJA1,SOX8,ITGA2,KIT,KITLG,NOTCH1,PTN,BMP7,SOX9,TAC1,NR2F2,TGFB2,TGFBR1,TGFBR2,VEGFA,CALR,ARID5B,TGFB1,GADD45A,RGCC,HDAC5,SOX10,SP100,DUSP10,CTSH,BMPER,AGT,EGF,ERBB4,FGF1,FGF2,SASH1,ANGPT1,LAMTOR2,APOE,MAP3K3,MET,PAK1,SEMA4C,SEMA6A,JCAD,TPBG,SCG2,ITGB1BP1,RFFL,SRGAP2,RAC1,FAP,RHOB,ANLN,DOCK1,SEMA3D,PLXND1,KANK1,MACF1,ENPP2,RHOJ,SPARC,SEMA3B,DOCK5,SEMA6D,SEMA3E,DDR2,ATP5F1B,GL…
3.AD/1.YC	Immature	Down	GO BP	GOBP_POSITIVE_REGULATION_OF_DEVELOPMENTAL_PROCESS	GOBP_POSITIVE_REGULATION_OF_DEVELOPMENTAL_PROCESS	0.848864	2.88218e-11	4.12986e-09	MEF2A,SEMA3A,CTNNA1,DCN,ETS1,ETV5,FGFR2,FLNA,FOS,GJA1,GLI3,SOX8,HSP90AB1,IGF1,INHBA,KIT,LRP2,KITLG,NOTCH1,SERPINE2,PLAG1,TESC,CHD7,PTN,ROBO2,BMP7,BMPR1B,SOX9,ZFP36L1,STK3,TGFB2,TGFBR1,TGFBR2,C3,VEGFA,WNT3,CALR,KDM2B,PTPRC,TGFB1,SLC39A12,ATP6AP1,B2M,DDAH1,RGCC,SOX4,OLIG2,YAP1,CUX1,FOXO3,CUX2,HIPK2,PAWR,HIF1AN,RARB,REST,SOX2,SOX10,STAT1,TCF7L2,EZR,NKX6-2,ACVR2B,SOX13,FERMT2,DUSP10,CTSH,BMPER,AGT,LP…
3.AD/1.YC	Immature	Down	GO BP	GOBP_BIOLOGICAL_PROCESS_INVOLVED_IN_SYMBIOTIC_INTERACTION	GOBP_BIOLOGICAL_PROCESS_INVOLVED_IN_SYMBIOTIC_INTERACTION	0.911499	3.9165e-11	5.46803e-09	DLG1,EGFR,SEPTIN6,HSP90AB1,ITGA2,NOTCH1,PCNA,PDGFRA,RPL29,RPS6,UBB,DYNLL1,PTPRC,RPL3,RPL5,RPL6,RPL10,RPL11,RPL23A,RPL24,RPL38,RPSA,RPS10,RPS14,RPS15,RPS19,RPS27,ATP6V0C,B2M,BCL2L1,RPL26,WWP2,HIPK2,RBL1,REST,RPS27A,SP100,STAT1,UBA52,UBC,RPL23,CSF1R,MDFIC,HTR2A,APOE,LYN,MET,PPIA,PSMB6,PSMC3,SH3RF1,RPS3,SYK,VRK2,YWHAB,IQGAP1,RBX1,CDC42,RPL35,RPL13A,RPL10A,RPL7,RPL7A,RPL8,RPL9,RPL12,RPL13,RPL15,RPL17…
3.AD/1.YC	Immature	Down	GO BP	GOBP_REGULATION_OF_CELL_PROJECTION_ORGANIZATION	GOBP_REGULATION_OF_CELL_PROJECTION_ORGANIZATION	1.09265	5.1966e-11	7.07387e-09	SEMA3A,ADCYAP1,LRRK2,CNR1,FLNA,HSPA5,ITGA2,KIT,PTN,ROBO2,BMP7,SPP1,TGFBR1,VEGFA,WNT3,DYNLL1,CD38,HDAC4,SEPTIN7,SLC39A12,MT3,B2M,TRPM2,YAP1,CUX1,CUX2,PRRX1,EZR,LPAR1,ALK,HRAS,APOE,LYN,NEFL,NTRK2,PAK1,PLCE1,SEMA4C,SEMA6A,IQGAP1,CDC42,HECW1,MYLIP,CFL1,STMN2,DVL1,EPHA3,SYNE2,RAC1,FUT9,LZTS1,EPS8,ANLN,COBL,CTNNA2,ZDHHC15,SEMA3D,NTNG1,FSTL4,PLXND1,KANK1,GRIP1,RHOQ,MACF1,PLXNB2,GAP43,LRP4,MAG,MYO10,OMG,…
3.AD/1.YC	Immature	Down	GO BP	GOBP_TUBE_MORPHOGENESIS	GOBP_TUBE_MORPHOGENESIS	0.983635	5.33169e-11	7.08074e-09	DCN,DLG1,EPAS1,ETS1,FGFR2,FLNA,SULF1,CLIC4,GLI3,SOX8,TNC,LRP2,MFGE8,NOTCH1,PDGFRA,PDGFRB,CHD7,PTN,BMP7,SOX9,ZFP36L1,STK3,NR2F2,TGFB2,TGFBR1,TGFBR2,C3,VEGFA,DDR1,KDM2B,LGR5,ADAM15,ADGRG1,QKI,TGFB1,SLC39A12,DDAH1,GADD45A,RGCC,SOX4,ID2,HDAC5,YAP1,HIPK2,PRRX1,HIF1AN,SOX10,SP100,STAT1,CSF1R,CTSH,BMPER,AGT,EGF,EPHB1,FGF1,FGF2,FLT1,SASH1,NPNT,ANGPT1,APOE,IL18,MAP3K3,MET,NTRK2,PAK1,SEMA4C,SEMA6A,JCAD,SYK…
3.AD/1.YC	Immature	Down	GO BP	GOBP_REGULATION_OF_ION_TRANSPORT	GOBP_REGULATION_OF_ION_TRANSPORT	0.81138	8.19882e-11	1.06292e-08	MEF2A,UNC13B,CFTR,PARK7,AZIN2,ADCYAP1,LRRK2,CNR1,CRH,CRHBP,DLG1,EGFR,FLNA,CLIC4,GJA1,GLI3,HSPA2,HSP90AB1,IGF1,PDGFRB,SERPINE2,TESC,CHD7,MAP2K6,SLC2A1,SPP1,TAC1,TGFB2,C3,TRPC3,VIP,DYNLL1,CD38,TGFB1,COX17,B2M,TF,SOX4,WWP2,PPM1A,REST,SP100,SREBF1,TCF7L2,EZR,KLF7,PER2,BAG3,ERP29,CNKSR3,AGT,EGF,ANGPT1,MDFIC,HRAS,HTR2A,HTR2C,APOE,LYN,NEFL,PAK1,PPIA,RASGRF1,RGS4,PINK1,SYK,TLR4,YWHAB,TNFRSF11A,ITGB1BP1,S…
3.AD/1.YC	Immature	Down	GO BP	GOBP_REGULATION_OF_MULTICELLULAR_ORGANISMAL_DEVELOPMENT	GOBP_REGULATION_OF_MULTICELLULAR_ORGANISMAL_DEVELOPMENT	0.81396	8.42834e-11	1.06726e-08	SEMA3A,ADCYAP1,CTNNA1,DCN,DLG1,ETS1,ETV5,FGFR2,SULF1,FOS,GJA1,GLI3,SOX8,IGF1,INHBA,KIT,LRP2,KITLG,NOTCH1,SERPINE2,PLAG1,TESC,CHD7,PTN,ROBO2,BMP7,BMPR1B,SOD1,SOX9,SPP1,ZFP36L1,TGFB2,TGFBR1,TGFBR2,C3,VEGFA,WNT3,SEPTIN7,PTPRC,TGFB1,SLC39A12,MT3,ATP6AP1,B2M,DDAH1,GADD45A,RGCC,SOX4,OLIG2,YAP1,CUX1,FOXO3,CUX2,HIPK2,JARID2,MAF,MEIS2,MITF,BCOR,RARB,REST,PRDM1,SOX10,SP100,STAT1,TRPS1,NKX6-2,BHLHE40,KLF7,P…
3.AD/1.YC	Immature	Down	GO BP	GOBP_ESTABLISHMENT_OF_PROTEIN_LOCALIZATION	GOBP_ESTABLISHMENT_OF_PROTEIN_LOCALIZATION	0.68813	1.05017e-10	1.27489e-08	UNC13B,CFTR,IFT27,PARK7,ADCYAP1,LRRK2,CNR1,DNAJC19,CRH,EGFR,CCT5,FLNA,NECTIN3,GJA1,GLI3,DDX25,HSPA5,HSP90AB1,IGF1,ITGA2,LRP2,TESC,PLEKHA1,RPL29,RPS6,SLC2A1,TGFB2,UBB,VGF,VIP,CALR,SPIRE2,DYNLL1,CD38,TGFB1,RPL3,RPL5,RPL6,RPL10,RPL11,RPL23A,RPL24,RPL38,RPSA,RPS10,RPS14,RPS15,RPS19,RPS27,PEX2,ARHGAP1,ATP6V1D,ATP6V0C,ATP6V0B,ATP6AP1,TF,ATP6V1F,RPL26,SOX4,TXNIP,WWP2,PPM1A,REST,RPS27A,SP100,SREBF1,TCF7L…
3.AD/1.YC	Immature	Down	GO BP	GOBP_REGULATION_OF_ANATOMICAL_STRUCTURE_MORPHOGENESIS	GOBP_REGULATION_OF_ANATOMICAL_STRUCTURE_MORPHOGENESIS	0.915407	1.05362e-10	1.27489e-08	SEMA3A,LRRK2,DCN,DLG1,ETS1,FGFR2,FLNA,PSME4,SULF1,GJA1,HEXB,SOX8,KIT,NOTCH1,PTN,ROBO2,BMP7,SOX9,SPP1,TGFB2,TGFBR2,C3,VEGFA,WNT3,CALR,SEPTIN7,TGFB1,SLC39A12,MT3,DDAH1,GADD45A,RGCC,CUX1,CUX2,HIPK2,PSMD10,SP100,STAT1,EZR,FERMT2,CSF1R,CTSH,BMPER,AGT,LPAR1,EGF,FGD2,FGF1,FGF2,FLT1,SASH1,NEFL,NTRK2,PAK1,SEMA4C,PSMB6,PSMC3,PSMC5,SEMA6A,JCAD,PINK1,C5,SPRY4,ITGB1BP1,SLC9A3R1,CDC42,HECW1,CFL1,DVL1,PHLDB1,SP…
3.AD/1.YC	Immature	Down	GO BP	GOBP_CELL_MORPHOGENESIS	GOBP_CELL_MORPHOGENESIS	0.887656	1.10058e-10	1.30276e-08	MEF2A,SEMA3A,MERTK,LRRK2,DLG1,EGFR,FGFR2,FLNA,CLIC4,GJA1,GLI3,HEXB,HSP90AB1,KIT,LRP2,NOTCH1,PTN,ROBO2,BMP7,BMPR1B,SOD1,SPP1,TGFB2,UBB,VEGFA,WNT3,DDR1,CALR,SEPTIN7,RPL24,MT3,NOX4,YAP1,CUX1,CUX2,EZR,KLF7,FERMT2,CSF1R,LPAR1,EPHB1,FGD2,GFRA1,APOE,MET,NEFL,NTRK2,PAK1,SHC3,SEMA4C,DOK5,SEMA6A,TPBG,SPRY4,IQGAP1,ITGB1BP1,SLC9A3R1,CDC42,HECW1,TUBB3,CFL1,CNP,DVL1,EPHA3,SRGAP2,TUBB2B,STMN1,NEFH,RAC1,EXT1,LZT…
3.AD/1.YC	Immature	Down	GO BP	GOBP_TRANSMEMBRANE_RECEPTOR_PROTEIN_TYROSINE_KINASE_SIGNALING_PATHWAY	GOBP_TRANSMEMBRANE_RECEPTOR_PROTEIN_TYROSINE_KINASE_SIGNALING_PATHWAY	1.0185	1.18839e-10	1.37676e-08	MERTK,DCN,EGFR,FGFR2,SULF1,IGF1,KIT,PDGFRA,PDGFRB,PLEKHA1,SOX9,VEGFA,DDR1,ARID5B,TGFB1,MT3,ATP6V1D,ATP6V0C,ATP6V0B,ATP6AP1,ATP6V1F,TXNIP,FRK,SREBF1,CCND3,SH2B3,CSF1R,AGT,EGF,SPRED2,EPHB1,ERBB3,ERBB4,FGF1,FGF2,FGFR3,FLT1,ALK,GFRA1,ANGPT1,HRAS,LYN,MET,NTRK2,PAK1,PLCE1,SHC3,DOK5,MAPK11,SEMA6A,JCAD,SYK,SPRY4,BCAR3,IQGAP1,SLC9A3R1,RASSF2,CDC42,STUB1,RNF126,EPHA3,STMN1,RAC1,EXT1,HSP90AA1,PRKCB,APOD,HNR…
3.AD/1.YC	Immature	Down	GO BP	GOBP_GLIAL_CELL_DIFFERENTIATION	GOBP_GLIAL_CELL_DIFFERENTIATION	1.65818	1.2679e-10	1.43827e-08	EGFR,GLI3,SOX8,NOTCH1,SERPINE2,PTN,SOD1,SOX9,EIF2B2,TGFB1,MT3,SOX4,OLIG2,SOX2,SOX10,NKX6-2,SOX13,DUSP10,LPAR1,ERBB3,GSTP1,LYN,NTRK2,TLR4,GPR37L1,CNP,CSPG5,CLU,GAP43,LAMA2,MAG,POU3F2,RELN,SOX6,IL6ST,KCNJ10,GRN,PLP1,GSN,IFNGR1,NDRG1,BACE2,VIM,GPR17,ASPA,FA2H,MYRF,SH3TC2,DAAM2,MOBP,OLIG1,OPALIN
3.AD/1.YC	Immature	Down	GO BP	GOBP_TUBE_DEVELOPMENT	GOBP_TUBE_DEVELOPMENT	0.886094	1.76012e-10	1.92628e-08	DCN,DLG1,EDNRB,EGFR,EPAS1,ETS1,FGFR2,FLNA,SULF1,CLIC4,GJA1,GLI3,SOX8,TNC,KIT,LRP2,MFGE8,NOTCH1,PDGFRA,PDGFRB,SERPINE2,CHD7,PTN,ROBO2,BMP7,SOX9,ZFP36L1,STK3,NR2F2,TGFB2,TGFBR1,TGFBR2,THRB,C3,UBB,VEGFA,DDR1,KDM2B,LGR5,ADAM15,ADGRG1,QKI,TGFB1,SLC39A12,CPS1,ASS1,DDAH1,GADD45A,RGCC,SOX4,ID2,HDAC5,YAP1,HIPK2,PRRX1,HIF1AN,RARB,SOX10,SP100,SREBF1,STAT1,ATP6AP2,CSF1R,CTSH,BMPER,AGT,EGF,EPHB1,FGF1,FGF2,FLT…
3.AD/1.YC	Immature	Down	GO BP	GOBP_REGULATION_OF_ANION_TRANSPORT	GOBP_REGULATION_OF_ANION_TRANSPORT	0.952217	1.77771e-10	1.92628e-08	MEF2A,UNC13B,CFTR,PARK7,AZIN2,ADCYAP1,LRRK2,CNR1,CRH,CRHBP,EGFR,FLNA,GJA1,GLI3,HSP90AB1,IGF1,CHD7,MAP2K6,SLC2A1,SPP1,TAC1,TGFB2,C3,VIP,DYNLL1,CD38,TGFB1,SOX4,WWP2,PPM1A,REST,SP100,SREBF1,TCF7L2,EZR,KLF7,PER2,BAG3,ERP29,AGT,EGF,ANGPT1,MDFIC,HRAS,HTR2A,HTR2C,APOE,PAK1,PPIA,RGS4,PINK1,SYK,TLR4,YWHAB,TNFRSF11A,ITGB1BP1,CDC42,CARTPT,ARIH2,BARD1,MTCL1,RAC1,C11ORF65,FIS1,ARPP19,PRKCB,BID,RACK1,APOD,HSPA…
3.AD/1.YC	Immature	Down	GO BP	GOBP_PEPTIDE_METABOLIC_PROCESS	GOBP_PEPTIDE_METABOLIC_PROCESS	0.967095	1.80423e-10	1.92628e-08	PARK7,EGFR,DDX25,IGF1,ITGA2,RPL29,RPS6,SOD1,ZFP36L1,CALR,EIF2B2,QKI,RPL3,RPL5,RPL6,RPL10,RPL11,RPL23A,RPL24,RPL38,RPSA,RPS27L,MRPS7,RPS10,RPS14,RPS15,RPS19,RPS27,RPL26,SOX4,FOXO3,RPS27A,UBA52,PER2,RPL23,ATP6AP2,CTSH,GSTP1,APOE,NTRK2,RPS3,PINK1,ZFP36L2,RPL35,RPL13A,RPL10A,RPL7,RPL7A,RPL8,RPL9,RPL12,RPL13,RPL15,RPL17,RPL18A,RPL19,RPL21,RPL27,RPL30,RPL27A,RPL28,RPL31,RPL32,RPL34,RPL35A,RPL37,RPL41,R…
3.AD/1.YC	Immature	Down	GO BP	GOBP_INTRACELLULAR_PROTEIN_TRANSPORT	GOBP_INTRACELLULAR_PROTEIN_TRANSPORT	0.828717	2.0824e-10	2.18051e-08	IFT27,PARK7,LRRK2,DNAJC19,FLNA,GLI3,DDX25,HSPA5,HSP90AB1,RPL29,RPS6,UBB,CALR,DYNLL1,TGFB1,RPL3,RPL5,RPL6,RPL10,RPL11,RPL23A,RPL24,RPL38,RPSA,RPS10,RPS14,RPS15,RPS19,RPS27,PEX2,RPL26,TXNIP,PPM1A,RPS27A,SP100,SREBF1,TCF7L2,UBA52,UBC,RPL23,BAG3,ERP29,ANGPT1,MDFIC,HRAS,PAK1,RPS3,PINK1,SYK,YWHAB,ITGB1BP1,CDC42,RPL35,RPL13A,RPL10A,RPL7,RPL7A,RPL8,RPL9,RPL12,RPL13,RPL15,RPL17,RPL18A,RPL19,RPL21,RPL27,RP…
3.AD/1.YC	Immature	Down	GO BP	GOBP_NEURON_DEVELOPMENT	GOBP_NEURON_DEVELOPMENT	0.840232	2.50458e-10	2.5731e-08	MEF2A,SEMA3A,IFT27,ADCYAP1,LRRK2,CNR1,CTNNA1,EDNRB,EGFR,FGFR2,FLNA,GJA1,GLI3,HSPA5,HSP90AB1,TNC,LRP2,NOTCH1,PTN,ROBO2,BMP7,BMPR1B,SOD1,SPP1,TGFB2,THRB,C3,UBB,VEGFA,WNT3,DDR1,CD38,RPL24,SLC39A12,MT3,B2M,CUX1,CUX2,PRRX1,EZR,KLF7,CSF1R,LPAR1,EPHB1,ALK,GFRA1,APOE,LYN,NEFL,NTRK2,PAK1,SHC3,SEMA4C,DOK5,SEMA6A,RASGRF1,TPBG,IQGAP1,SLC9A3R1,CDC42,HECW1,MYLIP,TUBB3,CFL1,STMN2,CNP,DCX,DVL1,EPHA3,SRGAP2,TUBB2…
3.AD/1.YC	Immature	Down	GO BP	GOBP_MAPK_CASCADE	GOBP_MAPK_CASCADE	0.912622	3.48417e-10	3.5132e-08	MEF2A,SEMA3A,ADCYAP1,LRRK2,DLG1,EGFR,FGFR2,PSME4,IGF1,KIT,KITLG,NOTCH1,PDGFRA,PDGFRB,MAP2K6,BMP7,SOD1,SOX9,ZFP36L1,STK3,TGFB2,UBB,VEGFA,PTPRC,TGFB1,MT3,ATP6AP1,TF,GADD45A,HIPK2,PSMD10,RPS27A,SOX2,UBA52,UBC,EZR,SH2B3,ATP6AP2,CAMKK2,ERP29,FERMT2,IRAK3,DUSP10,MAP3K8,CRYAB,CSF1R,CSF2RA,CTSH,PPM1L,SH3RF2,CNKSR3,DDT,BMPER,AGT,DUSP6,LPAR1,EGF,SPRED2,EPHB1,ERBB3,ERBB4,FGD2,MTURN,FGF1,FGF2,FGFR3,FLT1,PHLP…
3.AD/1.YC	Immature	Down	GO BP	GOBP_PEPTIDE_BIOSYNTHETIC_PROCESS	GOBP_PEPTIDE_BIOSYNTHETIC_PROCESS	1.03154	4.32909e-10	4.2858e-08	EGFR,DDX25,ITGA2,RPL29,RPS6,ZFP36L1,CALR,EIF2B2,QKI,RPL3,RPL5,RPL6,RPL10,RPL11,RPL23A,RPL24,RPL38,RPSA,RPS27L,MRPS7,RPS10,RPS14,RPS15,RPS19,RPS27,RPL26,SOX4,FOXO3,RPS27A,UBA52,PER2,RPL23,RPS3,PINK1,ZFP36L2,RPL35,RPL13A,RPL10A,RPL7,RPL7A,RPL8,RPL9,RPL12,RPL13,RPL15,RPL17,RPL18A,RPL19,RPL21,RPL27,RPL30,RPL27A,RPL28,RPL31,RPL32,RPL34,RPL35A,RPL37,RPL41,RPL36A,RPLP2,RPS2,RPS3A,RPS4X,RPS7,RPS9,RPS11,R…
3.AD/1.YC	Immature	Down	GO BP	GOBP_INTRACELLULAR_TRANSPORT	GOBP_INTRACELLULAR_TRANSPORT	0.693805	7.26981e-10	7.06859e-08	IFT27,PARK7,LRRK2,DNAJC19,FLNA,GLI3,DDX25,HSPA5,HSP90AB1,RPL29,RPS6,SOD1,UBB,CALR,SPIRE2,DYNLL1,TGFB1,RPL3,RPL5,RPL6,RPL10,RPL11,RPL23A,RPL24,RPL38,RPSA,RPS10,RPS14,RPS15,RPS19,RPS27,ABCD2,PEX2,ARHGAP1,RPL26,TXNIP,PPM1A,BACH2,RPS27A,SP100,SREBF1,TCF7L2,UBA52,UBC,EZR,UXT,RPL23,BAG3,NDE1,ERP29,CRYAB,ANGPT1,MDFIC,HRAS,APOE,NEFL,PAK1,RPS3,PINK1,SYK,YWHAB,ITGB1BP1,SLC9A3R1,CDC42,RPL35,RPL13A,RPL10A,RP…
3.AD/1.YC	Immature	Down	GO BP	GOBP_CELL_PROJECTION_ORGANIZATION	GOBP_CELL_PROJECTION_ORGANIZATION	0.716996	8.6125e-10	8.22721e-08	MEF2A,SEMA3A,IFT27,ADCYAP1,LRRK2,CNR1,CTNNA1,EGFR,FGFR2,SEPTIN6,FLNA,GJA1,GLI3,HSPA5,HSP90AB1,TNC,ITGA2,KIT,LRP2,NOTCH1,SPATA6,TTC12,PTN,PLEKHA1,ROBO2,BMP7,BMPR1B,SOD1,SPP1,TGFBR1,UBB,VEGFA,WNT3,DDR1,DYNLL1,CD38,HDAC4,SEPTIN7,RPL24,ABCD2,SLC39A12,MT3,ATP6V1D,B2M,TTYH1,TRPM2,CDC14B,YAP1,CUX1,CUX2,PRRX1,EZR,KLF7,NDE1,CSF1R,LPAR1,EPHB1,FGD2,ALK,GFRA1,HRAS,APOE,LYN,NEFL,NTRK2,PAK1,PLCE1,SHC3,SEMA4C,D…
3.AD/1.YC	Immature	Down	GO BP	GOBP_CELL_CELL_SIGNALING	GOBP_CELL_CELL_SIGNALING	0.693305	1.00961e-09	9.4781e-08	MERTK,UNC13B,CFTR,PARK7,ADCYAP1,LRRK2,CNR1,CRH,CRHBP,DLG1,EGFR,FGFR2,FLNA,PSME4,SULF1,GJA1,GLI3,TNC,INHBA,KIT,NDP,NOTCH1,SERPINE2,CHD7,MAP2K6,PTN,SLC2A1,SOX9,SPP1,STK3,TAC1,C3,UBB,VGF,VIP,WNT3,LGR5,DYNLL1,ADGRG1,CD38,TGFB1,ATP6V0C,SOX4,YAP1,CUX2,MITF,WWOX,PPM1A,PSMD10,REST,RPS27A,SOX2,SOX10,SREBF1,TCF7L2,UBA52,UBC,KLF7,PER2,SOX13,ATP6AP2,FERMT2,AGT,EGF,FGF2,FGFR3,MDFIC,HRAS,HTR2A,HTR2C,APOE,IL18,…
3.AD/1.YC	Immature	Down	GO BP	GOBP_POSITIVE_REGULATION_OF_LOCOMOTION	GOBP_POSITIVE_REGULATION_OF_LOCOMOTION	1.08117	1.0684e-09	9.72856e-08	SEMA3A,EGFR,ETS1,FLNA,HSPA5,IGF1,ITGA2,KIT,KITLG,NOTCH1,PDGFRA,PDGFRB,PTN,BMP7,SOX9,TAC1,TGFB2,TGFBR1,TGFBR2,VEGFA,CALR,HDAC4,PTPRC,TGFB1,TF,NOX4,FERMT2,CSF1R,CTSH,SH3RF2,AGT,LPAR1,EGF,FGF1,FGF2,FLT1,SASH1,GCNT2,ANGPT1,HRAS,LYN,MAP3K3,MET,PAK1,SEMA4C,SEMA6A,JCAD,TPBG,SCG2,IQGAP1,ITGB1BP1,SYNE2,RAC1,RHOB,RACK1,SOD2,DOCK1,SEMA3D,GAB1,ENPP2,PIK3R1,CARMIL1,RHOJ,PREX1,SPARC,SEMA3B,DOCK5,SEMA6D,SEMA3E,…
3.AD/1.YC	Immature	Down	GO BP	GOBP_REGULATION_OF_INTRACELLULAR_SIGNAL_TRANSDUCTION	GOBP_REGULATION_OF_INTRACELLULAR_SIGNAL_TRANSDUCTION	0.682901	1.08457e-09	9.72856e-08	SEMA3A,PARK7,ADCYAP1,LRRK2,CRH,DCN,DLG1,EGFR,FGFR2,FLNA,GJA1,HSP90AB1,IGF1,KIT,LRP2,KITLG,NOTCH1,PDGFRA,PDGFRB,SERPINE2,SEPTIN4,MAP2K6,PLEKHA1,BMP7,SOD1,SOX9,STK3,TGFB2,TGFBR1,UBB,VEGFA,CALR,ADGRG1,PTPRC,TGFB1,RPL5,RPL11,ARHGAP1,MT3,ATP6AP1,TF,GADD45A,BCL2L1,RPL26,NACC2,HIPK2,PPM1A,PSMD10,RPS27A,SOX2,STAT1,TCF7L2,UBA52,UBC,EZR,RPL23,SH2B3,ATP6AP2,ERP29,FERMT2,IRAK3,DUSP10,CSF1R,SH3RF2,CNKSR3,DDT,…
3.AD/1.YC	Immature	Down	GO BP	GOBP_NEGATIVE_REGULATION_OF_GENE_EXPRESSION	GOBP_NEGATIVE_REGULATION_OF_GENE_EXPRESSION	0.809928	1.08988e-09	9.72856e-08	MERTK,ADCY7,PARK7,LRRK2,CRH,EGFR,PSME4,HSP90AB1,IGF1,INHBA,NOTCH1,SERPINE2,PLAG1,RPL29,RPS6,ZFP36L1,TGFB2,UBB,VEGFA,VIP,CALR,PTPRC,TGFB1,RPL3,RPL5,RPL6,RPL10,RPL11,RPL23A,RPL24,RPL38,RPSA,RPS10,RPS14,RPS15,RPS19,RPS27,ABCD2,RGCC,RPL26,ID2,HDAC5,YAP1,WWP2,JARID2,PSMD10,RBL1,REST,RPS27A,UBA52,UBC,EZR,PARP9,IL33,RPL23,ERP29,IRAK3,FGF2,ANGPT1,GSTP1,HRAS,APOE,MIF,PSMB6,PSMC3,PSMC5,NDRG2,RPS3,PINK1,ZFP…
3.AD/1.YC	Immature	Down	GO BP	GOBP_POSITIVE_REGULATION_OF_INTRACELLULAR_SIGNAL_TRANSDUCTION	GOBP_POSITIVE_REGULATION_OF_INTRACELLULAR_SIGNAL_TRANSDUCTION	0.848219	1.25462e-09	1.10184e-07	SEMA3A,PARK7,ADCYAP1,LRRK2,CRH,DCN,EGFR,FGFR2,FLNA,GJA1,HSP90AB1,IGF1,KIT,LRP2,KITLG,NOTCH1,PDGFRA,PDGFRB,SEPTIN4,MAP2K6,SOD1,SOX9,STK3,TGFB2,TGFBR1,UBB,VEGFA,CALR,ADGRG1,PTPRC,TGFB1,RPL11,MT3,ATP6AP1,TF,GADD45A,BCL2L1,RPL26,NACC2,HIPK2,PPM1A,RPS27A,SOX2,TCF7L2,UBA52,UBC,RPL23,ERP29,FERMT2,CSF1R,SH3RF2,DDT,BMPER,AGT,DUSP6,LPAR1,EGF,SPRED2,ERBB3,ERBB4,FGD2,MTURN,FGF1,FGF2,FGFR3,FLT1,SASH1,PIK3R5,A…
3.AD/1.YC	Immature	Down	GO BP	GOBP_REGULATION_OF_TRANSPORT	GOBP_REGULATION_OF_TRANSPORT	0.687798	1.29274e-09	1.11729e-07	MEF2A,MERTK,UNC13B,CFTR,PARK7,AZIN2,ADCYAP1,LRRK2,CNR1,CRH,CRHBP,DLG1,EDNRB,EGFR,FLNA,CLIC4,GJA1,GLI3,HSPA2,HSP90AB1,IGF1,INHBA,ITGA2,MFGE8,NOTCH1,PDGFRB,SERPINE2,SEPTIN4,TESC,CHD7,MAP2K6,SLC2A1,SOD1,SPP1,TAC1,TGFB2,C3,TRPC3,VEGFA,VIP,CALR,DYNLL1,CD38,PTPRC,TGFB1,COX17,ARHGAP1,ATP6AP1,B2M,TF,RGCC,SOX4,WWP2,PPM1A,REST,SP100,SREBF1,TCF7L2,EZR,KLF7,PER2,BAG3,ERP29,CRYAB,CNKSR3,AGT,EGF,ERBB3,ANGPT1,M…
3.AD/1.YC	Immature	Down	GO BP	GOBP_PROTEIN_LOCALIZATION_TO_ORGANELLE	GOBP_PROTEIN_LOCALIZATION_TO_ORGANELLE	0.840017	1.54587e-09	1.3152e-07	PARK7,LRRK2,DNAJC19,CTNNA1,DLG1,CCT5,FLNA,GJA1,GLI3,HSPA5,HSP90AB1,RPL29,RPS6,BMP7,SOX9,UBB,CALR,TGFB1,RPL3,RPL5,RPL6,RPL10,RPL11,RPL23A,RPL24,RPL38,RPSA,RPS10,RPS14,RPS15,RPS19,RPS27,PEX2,ATP6V1D,RPL26,YAP1,TXNIP,CTCF,RPS27A,SP100,SREBF1,UBA52,UBC,EZR,PARP9,RPL23,BAG3,FERMT2,EGF,ANGPT1,MDFIC,HRAS,HTR2A,RPS3,PINK1,SYK,YWHAB,RPL35,RPL13A,RPL10A,RPL7,RPL7A,RPL8,RPL9,RPL12,RPL13,RPL15,RPL17,RPL18A,R…
3.AD/1.YC	Immature	Down	GO BP	GOBP_EXTERNAL_ENCAPSULATING_STRUCTURE_ORGANIZATION	GOBP_EXTERNAL_ENCAPSULATING_STRUCTURE_ORGANIZATION	1.21882	1.651e-09	1.38303e-07	CRTAP,COL9A3,COL16A1,DCN,ETS1,SULF1,TNC,ITGA2,NOTCH1,PDGFRA,HTRA1,SOX9,SPP1,TGFB2,TGFBR1,DDR1,ADAM19,ADAM15,TGFB1,RGCC,AGT,FGF2,NPNT,TIMP2,PHLDB1,PHLDB2,EXT1,CSGALNACT1,FAP,NTNG1,FLRT2,LAMA1,LAMA2,NTN4,SPARC,COL6A1,COL9A2,HAPLN1,SH3PXD2B,SULF2,HAPLN2,BCAN,COL27A1,ADAMTS4,DDR2,SMOC1,MYO1E,COL4A3,COL4A4,LAMA4,DPP4,ADAMTS9,ADAMTS3,COL5A1,COL12A1,CST3,CTSL,ADAMTS18,ITGAX,A2M,TNFRSF1A,ADAM12,ELN,AGRN,…
3.AD/1.YC	Immature	Down	GO BP	GOBP_OLIGODENDROCYTE_DIFFERENTIATION	GOBP_OLIGODENDROCYTE_DIFFERENTIATION	2.16608	1.71906e-09	1.41823e-07	GLI3,SOX8,NOTCH1,PTN,SOX9,EIF2B2,OLIG2,SOX10,NKX6-2,SOX13,DUSP10,LPAR1,GSTP1,LYN,NTRK2,CNP,CLU,MAG,SOX6,KCNJ10,PLP1,GSN,GPR17,ASPA,FA2H,MYRF,DAAM2,MOBP,OLIG1,OPALIN
3.AD/1.YC	Immature	Down	GO BP	GOBP_ENSHEATHMENT_OF_NEURONS	GOBP_ENSHEATHMENT_OF_NEURONS	1.91028	1.99948e-09	1.62495e-07	DLG1,HEXB,CLDN11,PTN,SOD1,EIF2B2,CD9,QKI,ABCD2,ACSBG1,OLIG2,RARB,SOX10,NKX6-2,LPAR1,MBP,NTRK2,CLU,MAG,POU3F2,UGT8,KCNJ10,PLP1,NDRG1,ITGAX,SERINC5,ACER3,ASPA,FA2H,MYRF,SH3TC2,MAL,PMP22,MOBP,PLLP,BCAS1
3.AD/1.YC	Immature	Down	GO BP	GOBP_ELECTRON_TRANSPORT_CHAIN	GOBP_ELECTRON_TRANSPORT_CHAIN	1.67913	2.12923e-09	1.70495e-07	PARK7,NOX4,PINK1,BID,GLRX2,CYBB,NDUFA2,NDUFC2,GHITM,COX7A1,TAZ,SLC25A13,SLC25A18,ETFB,GLDC,NDUFAB1,UQCR11,FDX2,NDUFA11,COX4I1,COX5B,COX6A1,COX6B1,COX6C,COX7B,COX7C,COX8A,UQCR10,NDUFS7,NDUFA3,NDUFA4,NDUFA5,NDUFB3,NDUFB4,NDUFB7,NDUFB8,NDUFB9,NDUFS5,NDUFS6,NDUFA13,NDUFB11,UQCRB,UQCRH,COX5A
3.AD/1.YC	Immature	Down	GO BP	GOBP_REGULATION_OF_CELL_DIFFERENTIATION	GOBP_REGULATION_OF_CELL_DIFFERENTIATION	0.703799	2.19406e-09	1.7314e-07	MEF2A,SEMA3A,ADCYAP1,LRRK2,CTNNA1,EDNRB,EGFR,ETS1,ETV5,FGFR2,FLNA,PSME4,FOS,GJA1,GLI3,SOX8,HSP90AB1,IGF1,INHBA,KIT,LRP2,KITLG,NOTCH1,PDGFRA,SERPINE2,PLAG1,TESC,CHD7,PTN,ROBO2,BMP7,BMPR1B,SOD1,SOX9,SPP1,ZFP36L1,STK3,TGFB2,TGFBR1,TGFBR2,THRB,VEGFA,WNT3,CALR,HDAC4,PTPRC,TGFB1,RPS19,MT3,ATP6AP1,B2M,RGCC,SOX4,ID2,HDAC5,OLIG2,YAP1,CUX1,FOXO3,CUX2,MAF,MEIS2,MITF,ZFHX3,HIF1AN,PSMD10,RARB,REST,PRDM1,SOX2,…
3.AD/1.YC	Immature	Down	GO BP	GOBP_POSITIVE_REGULATION_OF_CATALYTIC_ACTIVITY	GOBP_POSITIVE_REGULATION_OF_CATALYTIC_ACTIVITY	0.729166	2.36275e-09	1.83788e-07	MERTK,ADCY7,PARK7,AZIN2,ADCYAP1,LRRK2,DNAJC19,DLG1,EGFR,FGFR2,PSME4,HSPA2,HSP90AB1,IGF1,ITGA2,KIT,KITLG,PCNA,PDGFRA,PDGFRB,MAP2K6,SOD1,STK3,TGFB2,TGFBR1,TGFBR2,UBB,VEGFA,DDR1,DYNLL1,PTPRC,TGFB1,RPS27L,COX17,ARHGAP1,MT3,TF,GADD45A,RGCC,ETAA1,CDC14B,NOX4,PSMD10,REST,RPS27A,UBA52,UBC,CCND3,ERP29,FERMT2,MAP3K8,CSF1R,CTSH,AGT,DUSP6,LPAR1,EGF,EPHB1,ERBB3,ERBB4,FGD2,FGF1,FGF2,FGFR3,FLT1,SASH1,PIK3R5,ALK…
3.AD/1.YC	Immature	Down	GO BP	GOBP_ATP_METABOLIC_PROCESS	GOBP_ATP_METABOLIC_PROCESS	1.33736	2.47905e-09	1.90119e-07	PARK7,ADCYAP1,IGF1,HDAC4,TGFB1,ATP6V0C,HTR2A,PINK1,GAPDH,FIS1,BID,HSPA8,TIGAR,ATP5F1B,ATP1A2,ATP5F1A,TMSB4X,NDUFA2,ALDOC,NDUFC2,PFKL,PGAM1,GHITM,PID1,COX7A1,TAZ,SLC25A13,ENO2,NDUFAB1,ATP5MG,UQCR11,NDUFA11,COX4I1,COX5B,COX6A1,COX6B1,COX6C,COX7B,COX7C,COX8A,UQCR10,NDUFS7,NDUFA3,NDUFA4,NDUFA5,NDUFB3,NDUFB4,NDUFB7,NDUFB8,NDUFB9,NDUFS5,NDUFS6,ATP5F1C,NDUFA13,ATP5F1D,ATP5F1E,ATP5MC1,ATP5MC3,ATP5ME,ATP5…
3.AD/1.YC	Immature	Down	GO BP	GOBP_REGULATION_OF_PEPTIDE_TRANSPORT	GOBP_REGULATION_OF_PEPTIDE_TRANSPORT	1.03964	2.52444e-09	1.90911e-07	UNC13B,CFTR,PARK7,ADCYAP1,LRRK2,CNR1,CRH,CRHBP,EGFR,FLNA,GJA1,GLI3,HSP90AB1,IGF1,CHD7,SLC2A1,TGFB2,DYNLL1,CD38,TGFB1,SOX4,WWP2,PPM1A,REST,SP100,SREBF1,TCF7L2,EZR,KLF7,PER2,BAG3,ERP29,ANGPT1,MDFIC,HRAS,HTR2C,APOE,PAK1,PPIA,PINK1,TLR4,YWHAB,ITGB1BP1,CDC42,CARTPT,ARIH2,BARD1,MTCL1,RAC1,C11ORF65,FIS1,BID,RACK1,APOD,HSPA8,UBL5,TOMM7,PIK3R1,RHOU,PKDCC,STXBP5,SYT9,VAMP2,CACNB3,CA2,DPP4,PRR5L,ACSL3,ADCY5…
3.AD/1.YC	Immature	Down	GO BP	GOBP_SECRETION	GOBP_SECRETION	0.712275	2.85446e-09	2.12912e-07	MERTK,UNC13B,CFTR,MAGED2,PARK7,ADCYAP1,LRRK2,CNR1,CRH,CRHBP,EDNRB,EGFR,FLNA,GJA1,HEXB,HSP90AB1,IGF1,INHBA,KIT,NOTCH1,SERPINE2,SEPTIN4,CHD7,MAP2K6,SLC2A1,SOD1,SPP1,TAC1,TGFB2,C3,VEGFA,VGF,VIP,DDR1,DYNLL1,CD9,CD38,PTPRC,TGFB1,FTH1,FTL,ATP6V1D,ATP6V0C,ATP6AP1,B2M,TF,TRPM2,RGCC,SOX4,FRK,REST,SREBF1,TCF7L2,EZR,KLF7,PER2,ATP6AP2,ERP29,CTSH,AGT,EGF,ERBB3,ERBB4,LAMTOR2,GSTP1,HTR2A,HTR2C,APOE,LYN,MIF,NTRK…
3.AD/1.YC	Immature	Down	GO BP	GOBP_BLOOD_VESSEL_MORPHOGENESIS	GOBP_BLOOD_VESSEL_MORPHOGENESIS	1.02243	2.89731e-09	2.13187e-07	DCN,EPAS1,ETS1,FGFR2,FLNA,SULF1,CLIC4,LRP2,MFGE8,NOTCH1,PDGFRA,PDGFRB,CHD7,PTN,ZFP36L1,NR2F2,TGFB2,TGFBR1,TGFBR2,C3,VEGFA,ADAM15,ADGRG1,QKI,TGFB1,SLC39A12,DDAH1,GADD45A,RGCC,SOX4,HDAC5,YAP1,HIPK2,PRRX1,HIF1AN,SP100,STAT1,CTSH,BMPER,EGF,EPHB1,FGF1,FGF2,FLT1,SASH1,ANGPT1,APOE,IL18,MAP3K3,NTRK2,SEMA6A,JCAD,SYK,C5,SCG2,ITGB1BP1,CDC42,FAP,RHOB,PRKCB,APOD,PLXND1,GAB1,LAMA1,ENPP2,RHOJ,SPARC,SEMA3E,CYBB,…
3.AD/1.YC	Immature	Down	GO BP	GOBP_ACTIN_FILAMENT_BASED_PROCESS	GOBP_ACTIN_FILAMENT_BASED_PROCESS	0.918532	2.94673e-09	2.13933e-07	MEF2A,TESK2,CTNNA1,DLG1,FLNA,GJA1,KIT,PDGFRA,PDGFRB,TAC1,TGFBR1,CALR,SPIRE2,TF,TRPM2,RGCC,NOX4,PAWR,EZR,FERMT2,CSF1R,LPAR1,FGD2,HRAS,MET,PAK1,RGS4,IQGAP1,ITGB1BP1,SLC9A3R1,CDC42,CFL1,EPHA3,SYNE2,SRGAP2,STMN1,RAC1,PHLDB2,INF2,EPS8,RHOB,ANLN,COBL,DLC1,FMNL2,SHROOM1,CTNNA2,PALLD,KANK1,RHOQ,GAB1,RND3,PIK3R1,CARMIL1,RHOJ,ERMN,PREX1,SHROOM3,ACTB,SCN1B,SEMA3E,RHOBTB1,SVIL,FMN1,PLS3,ATP1A2,CTNNA3,KCNN2,K…
3.AD/1.YC	Immature	Down	GO BP	GOBP_REGULATION_OF_TRANSFERASE_ACTIVITY	GOBP_REGULATION_OF_TRANSFERASE_ACTIVITY	0.827941	3.01352e-09	2.15903e-07	MERTK,CCNI,ADCY7,PARK7,ADCYAP1,LRRK2,DLG1,EGFR,FGFR2,HSP90AB1,IGF1,KIT,KITLG,PCNA,PDGFRA,PDGFRB,TESC,MAP2K6,BMP7,SOD1,STK3,NR2F2,TGFB2,TGFBR1,TGFBR2,UBB,VEGFA,DDR1,PTPRC,TGFB1,RPL5,RPL11,MT3,TF,GADD45A,RGCC,ETAA1,CDC14B,NOX4,PSMD10,RBL1,RPS27A,UBA52,UBC,CCND3,RPL23,SH2B3,CAMKK2,ERP29,FERMT2,IRAK3,DUSP10,MAP3K8,CSF1R,AGT,DUSP6,LPAR1,EGF,SPRED2,EPHB1,ERBB3,ERBB4,FGD2,FGF1,FGF2,FGFR3,FLT1,SASH1,PIK3…
3.AD/1.YC	Immature	Down	GO BP	GOBP_CELL_PART_MORPHOGENESIS	GOBP_CELL_PART_MORPHOGENESIS	0.951306	4.97415e-09	3.51743e-07	MEF2A,SEMA3A,LRRK2,EGFR,FGFR2,GJA1,GLI3,HSP90AB1,LRP2,NOTCH1,PTN,ROBO2,BMP7,BMPR1B,SPP1,UBB,VEGFA,WNT3,DDR1,RPL24,MT3,CUX1,CUX2,EZR,KLF7,CSF1R,EPHB1,GFRA1,APOE,NEFL,NTRK2,PAK1,SHC3,SEMA4C,DOK5,SEMA6A,TPBG,IQGAP1,CDC42,HECW1,TUBB3,CFL1,CNP,DVL1,EPHA3,SRGAP2,TUBB2B,STMN1,NEFH,RAC1,FIS1,EXT1,LZTS1,MYO16,HSP90AA1,COBL,FARP1,CSPG5,C12ORF57,SYT2,CTNNA2,CPNE9,ZDHHC15,ALCAM,SEMA3D,NTNG1,PALLD,FSTL4,PLXND…
3.AD/1.YC	Immature	Down	GO BP	GOBP_CELLULAR_COMPONENT_MORPHOGENESIS	GOBP_CELLULAR_COMPONENT_MORPHOGENESIS	0.905669	5.45884e-09	3.81069e-07	MEF2A,SEMA3A,LRRK2,EGFR,FGFR2,GJA1,GLI3,HSP90AB1,LRP2,NOTCH1,PDGFRA,PDGFRB,PTN,ROBO2,BMP7,BMPR1B,SPP1,UBB,VEGFA,WNT3,DDR1,CD9,RPL24,MT3,CUX1,CUX2,EZR,KLF7,CSF1R,EPHB1,GFRA1,APOE,NEFL,NTRK2,PAK1,SHC3,SEMA4C,DOK5,SEMA6A,TPBG,IQGAP1,CDC42,HECW1,TUBB3,CFL1,CNP,DVL1,EPHA3,PHLDB1,SRGAP2,TUBB2B,STMN1,NEFH,RAC1,PHLDB2,FIS1,EXT1,LZTS1,MYO16,HSP90AA1,COBL,FARP1,CSPG5,C12ORF57,SYT2,CTNNA2,CPNE9,ZDHHC15,ALCA…
3.AD/1.YC	Immature	Down	GO BP	GOBP_CIRCULATORY_SYSTEM_PROCESS	GOBP_CIRCULATORY_SYSTEM_PROCESS	1.00042	6.13986e-09	4.23184e-07	MEF2A,SEMA3A,CNR1,CRH,DLG1,EDNRB,EGFR,EPAS1,FLNA,GJA1,LRP2,CHD7,MAP2K6,SLC2A1,SOD1,TAC1,TAC3,NR2F2,TGFB2,THRB,VEGFA,CD38,HDAC4,TGFB1,CPS1,DDAH1,ID2,NOX4,YAP1,SREBF1,STAT1,PER2,ATP6AP2,FERMT2,AGT,ANGPT1,HTR2A,APOE,RGS4,ITGB1BP1,GPR37L1,SLC9A3R1,CDC42,CARTPT,EXT1,HBB,SOD2,CACNG7,SCN1B,SGK1,DOCK5,CALM2,FLI1,SLC29A1,ATP1A2,SLC1A3,SLC22A3,SLC38A1,CTNNA3,KCNN2,KCNQ1,SCN4B,CACNB3,CACNA1G,COL4A3,ADRB1,SL…
3.AD/1.YC	Immature	Down	GO BP	GOBP_POSITIVE_REGULATION_OF_SIGNALING	GOBP_POSITIVE_REGULATION_OF_SIGNALING	0.656666	7.72295e-09	5.25644e-07	SEMA3A,CFTR,PARK7,ADCYAP1,LRRK2,CNR1,CRH,CTNNA1,DCN,EGFR,FGFR2,FLNA,PSME4,SULF1,GJA1,HSP90AB1,IGF1,INHBA,ITGA2,KIT,LRP2,KITLG,NOTCH1,PDGFRA,PDGFRB,SERPINE2,SEPTIN4,MAP2K6,PTN,ROBO2,BMP7,BMPR1B,SOD1,SOX9,SPP1,STK3,TAC1,TGFB2,TGFBR1,C3,UBB,VEGFA,WNT3,CALR,LGR5,DYNLL1,ADGRG1,CD38,PTPRC,TGFB1,RPL11,MT3,ATP6V0C,ATP6AP1,TF,GADD45A,BCL2L1,RPL26,SOX4,YAP1,NACC2,CUX2,HIPK2,WWOX,PRRX1,PPM1A,PSMD10,RPS27A,S…
3.AD/1.YC	Immature	Down	GO BP	GOBP_RESPONSE_TO_OXYGEN_CONTAINING_COMPOUND	GOBP_RESPONSE_TO_OXYGEN_CONTAINING_COMPOUND	0.662843	9.26159e-09	6.22585e-07	UNC13B,CFTR,ADCY7,PARK7,ADCYAP1,LRRK2,CNR1,COL16A1,CRH,CRHBP,CTNNA1,DCN,EDNRB,EGFR,ETS1,FGFR2,FLNA,FOS,GJA1,HMGCS1,HSPA5,HSP90AB1,TNC,IGF1,IGFBP7,INHBA,ITGA2,NOTCH1,PCNA,PDGFRA,PDGFRB,TESC,MAP2K6,PTN,CATSPERG,PLEKHA1,SLC2A1,BMP7,SOD1,SOX9,SPP1,ZFP36L1,TAC1,NR2F2,TGFB2,TGFBR1,TGFBR2,TRPC3,VGF,WNT3,CALR,DYNLL1,ADAM15,EIF2B2,CD38,TGFB1,MT3,ATP6V1D,ATP6V0C,ATP6V0B,ATP6AP1,TRPM2,ATP6V1F,CPS1,ASS1,SOX4…
3.AD/1.YC	Immature	Down	GO BP	GOBP_RESPONSE_TO_WOUNDING	GOBP_RESPONSE_TO_WOUNDING	0.967258	9.41253e-09	6.25015e-07	MERTK,CTNNA1,DCN,EGFR,ETS1,FGFR2,FLNA,GJA1,GLI3,TNC,IGF1,ITGA2,PDGFRA,PDGFRB,SERPINE2,PTN,RAD51B,SOD1,SPP1,ZFP36L1,TGFB2,TGFBR1,TGFBR2,TRPC3,VEGFA,DDR1,CD9,TGFB1,YAP1,SOX2,SH2B3,FERMT2,DUSP10,ERBB3,FGF1,FGF2,PIK3R5,HRAS,APOE,LYN,NEFL,PAK1,PPIA,ZFP36L2,SYK,TLR4,CDC42,RAC1,PHLDB2,EXT1,FAP,PRKCB,HBB,APOD,DOCK1,KANK1,MACF1,GAP43,MAG,PIK3R1,CARMIL1,PRKCQ,ACTB,SPARC,GNA11,SULF2,LNPK,WNT5B,GRN,EPB41L4B,…
3.AD/1.YC	Immature	Down	GO BP	GOBP_REGULATION_OF_MAPK_CASCADE	GOBP_REGULATION_OF_MAPK_CASCADE	0.937762	1.06834e-08	7.00855e-07	SEMA3A,ADCYAP1,LRRK2,DLG1,EGFR,FGFR2,IGF1,KIT,KITLG,NOTCH1,PDGFRA,PDGFRB,MAP2K6,BMP7,SOD1,STK3,TGFB2,UBB,VEGFA,PTPRC,TGFB1,MT3,ATP6AP1,TF,GADD45A,HIPK2,PSMD10,RPS27A,SOX2,UBA52,UBC,EZR,SH2B3,ATP6AP2,ERP29,FERMT2,IRAK3,DUSP10,CSF1R,SH3RF2,CNKSR3,DDT,BMPER,AGT,DUSP6,LPAR1,EGF,SPRED2,EPHB1,ERBB4,FGD2,MTURN,FGF1,FGF2,FGFR3,FLT1,PHLPP1,SASH1,PIK3R5,ALK,NPNT,GCNT2,GNG3,ANGPT1,RELL2,GPR37,GSTP1,NENF,MDF…
3.AD/1.YC	Immature	Down	GO BP	GOBP_REGULATION_OF_EPITHELIAL_CELL_MIGRATION	GOBP_REGULATION_OF_EPITHELIAL_CELL_MIGRATION	1.43438	1.54129e-08	9.8733e-07	SEMA3A,DCN,ETS1,ITGA2,NOTCH1,PTN,SOX9,TAC1,NR2F2,TGFB2,TGFBR2,VEGFA,CALR,TGFB1,GADD45A,RGCC,HDAC5,SP100,DUSP10,CTSH,BMPER,AGT,EGF,FGF1,FGF2,SASH1,ANGPT1,APOE,MAP3K3,MET,JCAD,ITGB1BP1,RAC1,RHOB,DOCK1,MACF1,ENPP2,RHOJ,SPARC,DOCK5,ATP5F1B,GLUL,ADIPOR1,GRN,ATP5F1A,PFN1,EPB41L4B,ADAMTS9,PTPRG,TMSB4X,PLPP3
3.AD/1.YC	Immature	Down	GO BP	GOBP_CELL_JUNCTION_ORGANIZATION	GOBP_CELL_JUNCTION_ORGANIZATION	0.911892	1.6563e-08	1.03661e-06	TESK2,UNC13B,LRRK2,COL16A1,CTNNA1,DLG1,FLNA,NECTIN3,GJA1,TNC,ITGA2,CLDN11,PTN,ROBO2,TGFB2,TGFBR1,C3,VEGFA,CD9,TGFB1,CUX2,REST,FERMT2,CSF1R,AGT,EPHB1,ERBB4,LAMTOR2,APOE,NEFL,NTRK2,TPBG,IQGAP1,ITGB1BP1,CDC42,CFL1,DVL1,TUBB,EPHA3,NEFH,RAC1,TUBA1A,PHLDB2,EXT1,APOD,HSPA8,CDH6,CDH7,FARP1,DLC1,CTNNA2,ZDHHC15,NTNG1,PLXND1,MACF1,PLXNB2,FLRT2,WHRN,GAP43,CDH20,LIMS1,LRP4,PIK3R1,PLXNB1,RELN,PTPRD,ACTB,SPARC,…
3.AD/1.YC	Immature	Down	GO BP	GOBP_SUPRAMOLECULAR_FIBER_ORGANIZATION	GOBP_SUPRAMOLECULAR_FIBER_ORGANIZATION	0.911892	1.6563e-08	1.03661e-06	MEF2A,CRTAP,PARK7,TUBGCP5,CTNNA1,DLG1,FLNA,HSP90AB1,PDGFRA,PDGFRB,TAC1,TGFB2,TGFBR1,SPIRE2,SLC39A12,B2M,TF,RGCC,NOX4,PAWR,EZR,NDE1,FERMT2,CRYAB,LPAR1,APOE,MET,NEFL,PAK1,RGS4,RPS3,ITGB1BP1,CDC42,CFL1,STMN2,DVL1,SPEF1,NCKAP5,STMN1,NEFH,STMN3,MID1IP1,RAC1,PHLDB2,EXT1,EPS8,RHOB,HSPA8,COBL,DLC1,CLU,SHROOM1,CTNNA2,KANK1,RND3,PIK3R1,CARMIL1,ERMN,PREX1,SHROOM3,RHOBTB1,SVIL,FMN1,PLS3,DDR2,CTNNA3,MYO1E,PFN…
3.AD/1.YC	Immature	Down	GO BP	GOBP_REGULATION_OF_NEURON_PROJECTION_DEVELOPMENT	GOBP_REGULATION_OF_NEURON_PROJECTION_DEVELOPMENT	1.11683	1.75092e-08	1.08338e-06	SEMA3A,ADCYAP1,LRRK2,CNR1,FLNA,HSPA5,PTN,ROBO2,BMP7,SPP1,VEGFA,WNT3,CD38,SLC39A12,MT3,B2M,CUX1,CUX2,PRRX1,LPAR1,ALK,APOE,LYN,NEFL,NTRK2,PAK1,SEMA4C,SEMA6A,IQGAP1,HECW1,MYLIP,CFL1,STMN2,DVL1,EPHA3,FUT9,LZTS1,COBL,CTNNA2,ZDHHC15,SEMA3D,NTNG1,FSTL4,PLXND1,KANK1,MACF1,PLXNB2,LRP4,MAG,OMG,PLXNB1,POU3F2,RELN,PREX1,DIP2B,PTPRD,SCN1B,SDC2,CDKL5,SEMA3B,SEMA6D,FEZ1,SEMA3E,GRN,PTPRG,LGALS1,NME2,TOX,ATP1B2,G…
3.AD/1.YC	Immature	Down	GO BP	GOBP_AXON_DEVELOPMENT	GOBP_AXON_DEVELOPMENT	1.036	1.95865e-08	1.1983e-06	SEMA3A,CNR1,CTNNA1,FGFR2,FLNA,GLI3,HSP90AB1,TNC,NOTCH1,PTN,ROBO2,BMP7,BMPR1B,SPP1,VEGFA,WNT3,DDR1,RPL24,MT3,EZR,KLF7,CSF1R,EPHB1,GFRA1,APOE,NEFL,NTRK2,PAK1,SHC3,SEMA4C,DOK5,SEMA6A,TUBB3,CNP,DVL1,EPHA3,TUBB2B,STMN1,NEFH,RAC1,EXT1,HSP90AA1,APOD,COBL,C12ORF57,CTNNA2,ALCAM,SEMA3D,NTNG1,PALLD,FSTL4,PLXND1,MACF1,PLXNB2,FLRT2,GAB1,GAP43,LAMA1,ANOS1,LAMA2,LRP4,MAG,OMG,PIK3R1,PLXNB1,POU3F2,PRKCQ,RELN,DPYS…
3.AD/1.YC	Immature	Down	GO BP	GOBP_CELLULAR_RESPIRATION	GOBP_CELLULAR_RESPIRATION	1.55905	2.14243e-08	1.29617e-06	PARK7,PRDM16,PINK1,BID,NDUFA2,NDUFC2,GHITM,TAZ,IDH2,SLC25A13,SLC25A18,ETFB,NDUFAB1,SUCLG2,SUCLA2,UQCR11,NDUFA11,COX4I1,COX5B,COX6A1,COX6B1,COX6C,COX7B,COX7C,COX8A,OPN3,UQCR10,NDUFS7,NDUFA3,NDUFA4,NDUFA5,NDUFB3,NDUFB4,NDUFB7,NDUFB8,NDUFB9,NDUFS5,NDUFS6,NDUFA13,ATP5F1D,NDUFB11,UQCRB,UQCRH,COX5A
3.AD/1.YC	Immature	Down	GO BP	GOBP_CELLULAR_MACROMOLECULE_LOCALIZATION	GOBP_CELLULAR_MACROMOLECULE_LOCALIZATION	0.598431	2.87151e-08	1.71817e-06	IFT27,PARK7,LRRK2,DNAJC19,CTNNA1,DLG1,EGFR,CCT5,SEPTIN6,FLNA,NECTIN3,GJA1,GLI3,DDX25,HSPA5,HSP90AB1,SEPTIN4,TESC,PTN,RPL29,RPS6,BMP7,SOX9,ZFP36L1,UBB,CALR,DYNLL1,SEPTIN7,TGFB1,RPL3,RPL5,RPL6,RPL10,RPL11,RPL23A,RPL24,RPL38,RPSA,RPS10,RPS14,RPS15,RPS19,RPS27,PEX2,ATP6V1D,BCL2L1,RPL26,YAP1,TXNIP,CTCF,NACC2,PPM1A,RPS27A,SP100,SREBF1,TCF7L2,UBA52,UBC,EZR,PARP9,RPL23,BAG3,GPSM2,ERP29,FERMT2,EGF,ERBB4,A…
3.AD/1.YC	Immature	Down	GO BP	GOBP_TISSUE_MIGRATION	GOBP_TISSUE_MIGRATION	1.27288	3.22058e-08	1.90609e-06	SEMA3A,DCN,ETS1,ITGA2,KIT,NOTCH1,PTN,SOX9,TAC1,NR2F2,TGFB2,TGFBR1,TGFBR2,VEGFA,CALR,TGFB1,GADD45A,RGCC,HDAC5,SP100,DUSP10,CTSH,BMPER,AGT,EGF,FGF1,FGF2,SASH1,ANGPT1,APOE,MAP3K3,MET,JCAD,SCG2,ITGB1BP1,RAC1,FAP,RHOB,ANLN,DOCK1,PLXND1,KANK1,MACF1,ENPP2,RHOJ,SPARC,DOCK5,ATP5F1B,GLUL,AMOT,ADIPOR1,FSTL1,DPP4,GRN,ATP5F1A,PFN1,EPB41L4B,ADAMTS9,PTPRG,TMSB4X,PLPP3
3.AD/1.YC	Immature	Down	GO BP	GOBP_RESPONSE_TO_ENDOGENOUS_STIMULUS	GOBP_RESPONSE_TO_ENDOGENOUS_STIMULUS	0.645863	3.27452e-08	1.91718e-06	CFTR,ADCY7,PARK7,ADCYAP1,LRRK2,COL16A1,CRH,CRHBP,CTNNA1,EDNRB,EGFR,FGFR2,FLNA,SULF1,FOS,GJA1,GLI3,HMGCS1,HSPA5,HSP90AB1,TNC,IGF1,IGFBP7,INHBA,ITGA2,KIT,LRP2,NOTCH1,PCNA,PDGFRA,PDGFRB,HTRA1,PTN,CATSPERG,ROBO2,SLC2A1,BMP7,BMPR1B,SOD1,SOX9,SPP1,ZFP36L1,TAC1,TGFB2,TGFBR1,TGFBR2,THRB,UBB,VGF,CALR,PAQR8,LGR5,EIF2B2,CD9,CD38,HDAC4,TGFB1,ACSBG1,MT3,ATP6V1D,ATP6V0C,ATP6V0B,ATP6AP1,TRPM2,ATP6V1F,CPS1,ASS1,…
3.AD/1.YC	Immature	Down	GO BP	MANGO	MANGO neurogenesis	1.09535	4.02186e-08	2.32968e-06	ADCYAP1,LRRK2,CNR1,FGFR2,FOS,GLI3,IGF1,INHBA,LRP2,NOTCH1,SERPINE2,CHD7,PTN,BMPR1B,SPP1,TAC1,TGFBR2,THRB,VEGFA,VGF,TGFB1,BCL2L1,SOX4,OLIG2,REST,SOX2,PER2,CCND3,NDE1,ATP6AP2,LPAR1,EGF,EPHB1,FGF1,FGF2,FGFR3,FLT1,ALK,HRAS,HTR2A,HTR2C,APOE,MIF,NTRK2,NDRG2,RASGRF1,TLR4,CDC42,DCX,LMNA,NEFH,RAC1,TUBA1A,CCND2,RELN,S100B,SPARC,SLC1A3,GRN,FAAH,LGALS1,GSN,CST3,PRNP,TNFRSF1A,SLC12A2,HOMER1,VEGFB,NPY,SLC1A2,AQ…
3.AD/1.YC	Immature	Down	GO BP	GOBP_VASCULATURE_DEVELOPMENT	GOBP_VASCULATURE_DEVELOPMENT	0.89495	4.35553e-08	2.4964e-06	DCN,EPAS1,ETS1,FGFR2,FLNA,SULF1,CLIC4,GLI3,KIT,LRP2,MFGE8,NDP,NOTCH1,PDGFRA,PDGFRB,CHD7,PTN,ROBO2,BMP7,ZFP36L1,NR2F2,TGFB2,TGFBR1,TGFBR2,C3,VEGFA,ADAM15,ADGRG1,QKI,TGFB1,SLC39A12,DDAH1,GADD45A,RGCC,SOX4,HDAC5,YAP1,HIPK2,PRRX1,HIF1AN,SP100,STAT1,TCF7L2,ACVR2B,CTSH,BMPER,EGF,EPHB1,FGF1,FGF2,FLT1,SASH1,ANGPT1,APOE,IL18,MAP3K3,NTRK2,SEMA6A,JCAD,SYK,C5,SCG2,ITGB1BP1,CDC42,FAP,RHOB,PRKCB,APOD,SOD2,PLXN…
3.AD/1.YC	Immature	Down	GO BP	GOBP_POSITIVE_REGULATION_OF_TRANSFERASE_ACTIVITY	GOBP_POSITIVE_REGULATION_OF_TRANSFERASE_ACTIVITY	0.901799	4.54846e-08	2.5708e-06	MERTK,ADCY7,PARK7,ADCYAP1,LRRK2,DLG1,EGFR,FGFR2,HSP90AB1,IGF1,KIT,KITLG,PCNA,PDGFRA,PDGFRB,MAP2K6,SOD1,STK3,TGFB2,TGFBR1,TGFBR2,UBB,VEGFA,DDR1,PTPRC,TGFB1,MT3,TF,GADD45A,RGCC,ETAA1,CDC14B,NOX4,PSMD10,RPS27A,UBA52,UBC,CCND3,ERP29,FERMT2,MAP3K8,CSF1R,AGT,DUSP6,LPAR1,EGF,EPHB1,ERBB3,ERBB4,FGD2,FGF1,FGF2,FGFR3,FLT1,SASH1,PIK3R5,ALK,GNG3,ANGPT1,LAMTOR2,MDFIC,HRAS,HTR2A,IL18,LYN,MAP3K3,MET,MAP3K11,NTRK…
3.AD/1.YC	Immature	Down	GO BP	GOBP_INOSITOL_LIPID_MEDIATED_SIGNALING	GOBP_INOSITOL_LIPID_MEDIATED_SIGNALING	1.49753	4.82729e-08	2.6821e-06	DCN,EGFR,IGF1,KIT,PDGFRA,PDGFRB,SERPINE2,PLEKHA1,SOX9,ZFP36L1,TGFB2,EZR,CSF1R,AGT,EGF,ERBB3,ERBB4,FGF2,FLT1,PIK3R5,ANGPT1,HTR2A,IL18,LYN,NTRK2,PLCE1,SLC9A3R1,STAMBP,MYO16,TSC2,GAB1,PIK3R1,PLXNB1,PREX2,GAB2,PIP4K2A,PRR5L,GSN,PLCH1,PLCB4,PLCH2,PIK3IP1,PIP4K2C,ADAP2
3.AD/1.YC	Immature	Down	GO BP	GOBP_CELL_MORPHOGENESIS_INVOLVED_IN_DIFFERENTIATION	GOBP_CELL_MORPHOGENESIS_INVOLVED_IN_DIFFERENTIATION	0.867489	6.48883e-08	3.56885e-06	MEF2A,SEMA3A,MERTK,LRRK2,FGFR2,FLNA,CLIC4,GLI3,HSP90AB1,NOTCH1,PTN,ROBO2,BMP7,BMPR1B,SOD1,SPP1,VEGFA,WNT3,CALR,RPL24,MT3,CUX1,CUX2,EZR,KLF7,FERMT2,CSF1R,EPHB1,GFRA1,APOE,MET,NEFL,NTRK2,PAK1,SHC3,SEMA4C,DOK5,SEMA6A,TPBG,SPRY4,ITGB1BP1,SLC9A3R1,CDC42,HECW1,TUBB3,CFL1,CNP,DVL1,EPHA3,SRGAP2,TUBB2B,STMN1,NEFH,RAC1,EXT1,LZTS1,HSP90AA1,COBL,FARP1,CSPG5,C12ORF57,CTNNA2,ZDHHC15,DOCK1,ALCAM,SEMA3D,NTNG1,PA…
3.AD/1.YC	Immature	Down	GO BP	GOBP_CELL_POPULATION_PROLIFERATION	GOBP_CELL_POPULATION_PROLIFERATION	0.593729	7.54274e-08	4.0987e-06	ADCYAP1,LRRK2,CRH,CTNNA1,DLG1,EDNRB,EGFR,ETS1,ETV5,ETV6,FGFR2,FLNA,SULF1,GJA1,GLI3,SOX8,TNC,IGF1,IGFBP7,INHBA,ITGA2,KIT,LRP2,KITLG,NOTCH1,OCA2,PDGFRA,PDGFRB,SERPINE2,PLAG1,TESC,HTRA1,PTN,RPS6,BMP7,BMPR1B,SOX9,ZFP36L1,STK3,TAC1,NR2F2,TGFB2,TGFBR1,TGFBR2,VEGFA,VIP,WNT3,DDR1,CALR,KDM2B,LGR5,ADGRG1,CD38,HDAC4,PTPRC,TGFB1,PEX2,COX17,FTH1,B2M,DDAH1,SYF2,RGCC,SOX4,ID2,NOX4,YAP1,TXNIP,CTCF,NACC2,EID2,FRK…
3.AD/1.YC	Immature	Down	GO BP	GOBP_CELL_MORPHOGENESIS_INVOLVED_IN_NEURON_DIFFERENTIATION	GOBP_CELL_MORPHOGENESIS_INVOLVED_IN_NEURON_DIFFERENTIATION	0.939741	7.7842e-08	4.13702e-06	MEF2A,SEMA3A,LRRK2,FGFR2,GLI3,HSP90AB1,NOTCH1,PTN,ROBO2,BMP7,BMPR1B,SOD1,SPP1,VEGFA,WNT3,RPL24,MT3,CUX1,CUX2,EZR,KLF7,CSF1R,EPHB1,GFRA1,APOE,NEFL,NTRK2,PAK1,SHC3,SEMA4C,DOK5,SEMA6A,TPBG,SLC9A3R1,CDC42,HECW1,TUBB3,CFL1,CNP,DVL1,EPHA3,TUBB2B,STMN1,NEFH,RAC1,EXT1,LZTS1,HSP90AA1,COBL,FARP1,C12ORF57,CTNNA2,ZDHHC15,ALCAM,SEMA3D,NTNG1,PALLD,FSTL4,PLXND1,MACF1,PLXNB2,FLRT2,GAB1,WHRN,GAP43,LAMA1,ANOS1,LAM…
3.AD/1.YC	Immature	Down	GO BP	GOBP_POSITIVE_REGULATION_OF_TRANSPORT	GOBP_POSITIVE_REGULATION_OF_TRANSPORT	0.793585	9.08216e-08	4.75503e-06	MEF2A,MERTK,UNC13B,CFTR,PARK7,AZIN2,ADCYAP1,LRRK2,CNR1,CRH,DLG1,EDNRB,EGFR,FLNA,GJA1,GLI3,HSPA2,HSP90AB1,IGF1,INHBA,ITGA2,MFGE8,PDGFRB,TESC,MAP2K6,SOD1,SPP1,TAC1,TGFB2,C3,TRPC3,VEGFA,VIP,CALR,DYNLL1,CD38,PTPRC,TGFB1,COX17,ATP6AP1,B2M,TF,RGCC,SOX4,PPM1A,TCF7L2,EZR,BAG3,CNKSR3,EGF,ANGPT1,HRAS,APOE,PAK1,PPIA,PINK1,SYK,TLR4,YWHAB,TNFRSF11A,ITGB1BP1,SLC9A3R1,CDC42,CARTPT,ARIH2,MTCL1,RAC1,FIS1,ARPP19,B…
3.AD/1.YC	Immature	Down	GO BP	GOBP_REGULATION_OF_CELL_ADHESION	GOBP_REGULATION_OF_CELL_ADHESION	0.864831	9.35656e-08	4.85205e-06	COL16A1,DLG1,ETS1,FLNA,GLI3,TNC,IGF1,ITGA2,NOTCH1,SERPINE2,TESC,PTN,BMP7,SOX9,TGFB2,TGFBR2,VEGFA,DDR1,CALR,ADAM19,ADAM15,CD9,ADGRG1,PTPRC,TGFB1,ASS1,RGCC,SOX4,ZFHX3,PAWR,SOX2,SOX13,SH2B3,FERMT2,DUSP10,MAP3K8,ERBB3,NPNT,GCNT2,ANGPT1,RELL2,IL18,ITPKB,LYN,MBP,PAK1,SEMA6A,RPS3,SYK,SPRY4,RIPK2,IQGAP1,ITGB1BP1,CDC42,EPHA3,RAC1,PHLDB2,FUT9,APOD,DLC1,CSPG5,DOCK1,PLXND1,KANK1,MACF1,PLXNB2,LAMA1,LAMA2,LIMS…
3.AD/1.YC	Immature	Down	GO BP	GOBP_CIRCULATORY_SYSTEM_DEVELOPMENT	GOBP_CIRCULATORY_SYSTEM_DEVELOPMENT	0.740592	1.03588e-07	5.3211e-06	MEF2A,DCN,EGFR,EPAS1,ETS1,FGFR2,FLNA,SULF1,CLIC4,GJA1,GLI3,IGF1,KIT,LRP2,MFGE8,NDP,NOTCH1,PCNA,PDGFRA,PDGFRB,CHD7,PTN,ROBO2,BMP7,SOX9,ZFP36L1,STK3,NR2F2,TGFB2,TGFBR1,TGFBR2,C3,VEGFA,CALR,ADAM15,ADGRG1,QKI,TGFB1,SLC39A12,DDAH1,GADD45A,RGCC,SOX4,HDAC5,YAP1,HIPK2,JARID2,PRRX1,BCOR,HIF1AN,RARB,REST,SP100,STAT1,TCF7L2,ACVR2B,CTSH,BMPER,DUSP6,EGF,EPHB1,ERBB3,ERBB4,FGF1,FGF2,FLT1,SASH1,ANGPT1,APOE,IL18,…
3.AD/1.YC	Immature	Down	GO BP	GOBP_GLIAL_CELL_DEVELOPMENT	GOBP_GLIAL_CELL_DEVELOPMENT	1.8333	1.06141e-07	5.39767e-06	EGFR,SOD1,EIF2B2,MT3,SOX4,SOX10,NKX6-2,LPAR1,GSTP1,LYN,NTRK2,TLR4,CSPG5,CLU,MAG,POU3F2,KCNJ10,GRN,PLP1,GSN,IFNGR1,NDRG1,BACE2,VIM,ASPA,FA2H,MYRF,SH3TC2,MOBP,OLIG1
3.AD/1.YC	Immature	Down	GO BP	GOBP_SYNAPSE_ORGANIZATION	GOBP_SYNAPSE_ORGANIZATION	1.07309	1.2563e-07	6.27573e-06	UNC13B,LRRK2,DLG1,FLNA,TNC,PTN,ROBO2,C3,CUX2,REST,EPHB1,ERBB4,APOE,NEFL,NTRK2,TPBG,CDC42,CFL1,DVL1,TUBB,NEFH,TUBA1A,HSPA8,FARP1,CTNNA2,ZDHHC15,NTNG1,PLXND1,PLXNB2,FLRT2,GAP43,LRP4,PLXNB1,RELN,PTPRD,ACTB,SPARC,CDKL5,CNTN2,SLITRK2,SEMA3E,BCAN,SRGN,SNCG,CACNB3,GPC6,ACTG1,MDGA1,NDRG1,PRNP,CX3CR1,HOMER1,PTPRT,RER1,ARHGAP22,UTRN,GRID2,ABHD17B,C1QB,CBLN4,SLC6A1,CACNB4,AGRN,ELFN1,PTPRF,LRRTM3,SYNDIG1,CDH…
3.AD/1.YC	Immature	Down	GO BP	GOBP_REGULATION_OF_HYDROLASE_ACTIVITY	GOBP_REGULATION_OF_HYDROLASE_ACTIVITY	0.674266	1.31669e-07	6.45889e-06	PARK7,ADCYAP1,LRRK2,DNAJC19,EGFR,FGFR2,PSME4,HSPA2,HSP90AB1,ITGA2,KIT,PCNA,PDGFRA,PDGFRB,SERPINE2,PTN,SOD1,TGFB2,C3,VEGFA,DYNLL1,PTPRC,RPS27L,ARHGAP1,MT3,REST,SOX2,NDE1,FERMT2,CRYAB,CTSH,SH3RF2,AGT,LPAR1,FGD2,FGF2,FGFR3,FLT1,HRAS,HTR2A,LYN,MBP,MET,NTRK2,PEBP1,SH3RF1,RASGRF1,RGS3,RGS4,RPS3,MAPK12,PINK1,SYK,TIMP2,TIMP3,TRAF2,C5,BCAR3,RIPK2,IQGAP1,ITGB1BP1,RFFL,EPHA3,MTCL1,SRGAP2,GAPDH,STMN1,STMN3,F…
3.AD/1.YC	Immature	Down	GO BP	GOBP_POSITIVE_REGULATION_OF_MAPK_CASCADE	GOBP_POSITIVE_REGULATION_OF_MAPK_CASCADE	0.976779	1.33823e-07	6.50597e-06	SEMA3A,ADCYAP1,LRRK2,EGFR,FGFR2,IGF1,KIT,KITLG,NOTCH1,PDGFRA,PDGFRB,MAP2K6,SOD1,STK3,TGFB2,UBB,VEGFA,PTPRC,TGFB1,MT3,ATP6AP1,TF,GADD45A,HIPK2,RPS27A,SOX2,UBA52,UBC,ERP29,FERMT2,CSF1R,SH3RF2,DDT,BMPER,AGT,DUSP6,LPAR1,EGF,ERBB4,FGD2,MTURN,FGF1,FGF2,FGFR3,FLT1,SASH1,PIK3R5,ALK,NPNT,GCNT2,GNG3,ANGPT1,RELL2,GPR37,NENF,MDFIC,HRAS,HTR2A,HTR2C,APOE,MAP3K3,MIF,MAP3K11,NTRK2,PAK1,PLCE1,PDE8A,PPIA,SEMA4C,DO…
3.AD/1.YC	Immature	Down	GO BP	GOBP_REGULATION_OF_PROTEIN_LOCALIZATION	GOBP_REGULATION_OF_PROTEIN_LOCALIZATION	0.787324	1.36237e-07	6.56469e-06	UNC13B,CFTR,PARK7,ADCYAP1,LRRK2,CNR1,CRH,CTNNA1,DLG1,EGFR,CCT5,FLNA,GJA1,GLI3,HSP90AB1,IGF1,PTN,SLC2A1,TGFB2,VIP,DYNLL1,CD38,TGFB1,BCL2L1,SOX4,YAP1,WWP2,PPM1A,REST,SP100,SREBF1,TCF7L2,EZR,PARP9,KLF7,PER2,BAG3,GPSM2,ERP29,FERMT2,EGF,ERBB4,ANGPT1,MDFIC,HRAS,APOE,PAK1,PPIA,PINK1,TLR4,YWHAB,IQGAP1,ITGB1BP1,CDC42,CARTPT,ARIH2,BARD1,DVL1,EPHA3,MTCL1,GNAI1,RAC1,C11ORF65,FIS1,LATS2,HSP90AA1,BID,RACK1,APO…
3.AD/1.YC	Immature	Down	GO BP	GOBP_WOUND_HEALING	GOBP_WOUND_HEALING	0.97325	1.40324e-07	6.70231e-06	MERTK,DCN,EGFR,ETS1,FGFR2,FLNA,GJA1,GLI3,TNC,IGF1,ITGA2,PDGFRA,PDGFRB,SERPINE2,RAD51B,TGFB2,TGFBR1,TGFBR2,TRPC3,VEGFA,DDR1,CD9,TGFB1,YAP1,SH2B3,FERMT2,DUSP10,ERBB3,FGF1,FGF2,PIK3R5,HRAS,APOE,LYN,PAK1,PPIA,SYK,TLR4,CDC42,RAC1,PHLDB2,EXT1,FAP,PRKCB,HBB,DOCK1,KANK1,MACF1,PIK3R1,CARMIL1,PRKCQ,ACTB,SPARC,GNA11,LNPK,WNT5B,EPB41L4B,P2RY12,PLPP3,PLA2G4A,COL5A1,ACTG1,FZD6,GSN,DOCK8,CSRP1,DGKA,ADAMTS18,ENP…
3.AD/1.YC	Immature	Down	GO BP	GOBP_NEGATIVE_REGULATION_OF_LOCOMOTION	GOBP_NEGATIVE_REGULATION_OF_LOCOMOTION	1.20515	1.44859e-07	6.85878e-06	SEMA3A,CTNNA1,DCN,SULF1,CLIC4,GJA1,NOTCH1,PTN,ROBO2,NR2F2,WNT3,CALR,ADAM15,ADGRG1,TGFB1,GADD45A,RGCC,HDAC5,FOXO3,MITF,SP100,IL33,DUSP10,DDT,ERBB4,FGF2,GSTP1,APOE,MIF,SEMA4C,SEMA6A,C5,ITGB1BP1,SLC9A3R1,SRGAP2,RAC1,PHLDB2,RHOB,APOD,DLC1,SEMA3D,KANK1,SEMA3B,SEMA6D,SEMA3E,ADIPOR1,DPP4,ADAMTS9,PTPRG,PADI2,CX3CR1,ATP1B2,PTPRT,RIN3,IDH2,PTPRU,CDH1,DPYSL3,FRMD5,SRGAP1
3.AD/1.YC	Immature	Down	GO BP	GOBP_REGULATION_OF_CELLULAR_COMPONENT_BIOGENESIS	GOBP_REGULATION_OF_CELLULAR_COMPONENT_BIOGENESIS	0.756662	1.66783e-07	7.82871e-06	UNC13B,PARK7,LRRK2,COL16A1,DLG1,FLNA,GJA1,HSPA2,HSPA5,KIT,NOTCH1,ROBO2,BMP7,SOX9,TAC1,TGFBR1,VEGFA,SPIRE2,DYNLL1,HDAC4,SEPTIN7,TGFB1,SLC39A12,TRPM2,RGCC,NOX4,YAP1,CUX2,PPM1A,REST,EZR,GPSM2,FERMT2,CRYAB,AGT,LPAR1,EPHB1,HRAS,APOE,MET,NTRK2,PAK1,PLCE1,PSMC3,PSMC5,RPS3,AIDA,PINK1,SYK,TLR4,TPBG,TRAF2,IQGAP1,ITGB1BP1,RBX1,CDC42,PHF8,RPL13A,STUB1,C10ORF90,STMN2,EPHA3,PHLDB1,SYNE2,STMN1,MDM1,RAC1,KAT2B,P…
3.AD/1.YC	Immature	Down	GO BP	GOBP_APOPTOTIC_PROCESS	GOBP_APOPTOTIC_PROCESS	0.577285	1.75428e-07	8.16414e-06	MEF2A,SEMA3A,MERTK,UNC13B,PARK7,ADCYAP1,LRRK2,CNR1,CRH,CTNNA1,EDNRB,EGFR,ETV6,FGFR2,FLNA,SULF1,GJA1,GLI3,SOX8,HSPA5,HSP90AB1,IGF1,INHBA,LRP2,KITLG,NOTCH1,PDGFRB,SEPTIN4,MAP2K6,PTN,ROBO2,RPS6,BMP7,BMPR1B,SOD1,SOX9,ZFP36L1,STK3,TGFB2,TGFBR1,TGFBR2,THRB,UBB,VEGFA,VIP,CALR,KDM2B,DYNLL1,CD38,HDAC4,PTPRC,TGFB1,RPL10,RPL11,RPS27L,MT3,GADD45A,RGCC,BCL2L1,RPL26,SOX4,NOX4,YAP1,TXNIP,NACC2,FOXO3,HIPK2,MITF,…
3.AD/1.YC	Immature	Down	GO BP	GOBP_CELLULAR_RESPONSE_TO_OXYGEN_CONTAINING_COMPOUND	GOBP_CELLULAR_RESPONSE_TO_OXYGEN_CONTAINING_COMPOUND	0.692777	1.85584e-07	8.56358e-06	UNC13B,CFTR,ADCY7,PARK7,LRRK2,COL16A1,CRH,CRHBP,CTNNA1,EDNRB,EGFR,ETS1,FGFR2,FLNA,FOS,GJA1,HMGCS1,HSPA5,TNC,IGF1,INHBA,ITGA2,PCNA,PDGFRA,TESC,MAP2K6,PTN,PLEKHA1,BMP7,SOD1,SOX9,SPP1,ZFP36L1,WNT3,DYNLL1,ADAM15,TGFB1,MT3,ATP6V1D,ATP6V0C,ATP6V0B,ATP6AP1,TRPM2,ATP6V1F,CPS1,ASS1,SOX4,NOX4,HDAC5,YAP1,PAWR,SOX10,SREBF1,EZR,KLF7,CCND3,RPL23,CAMKK2,LPAR1,SASH1,ALK,GPR37,LAMTOR2,GSTP1,HTR2A,HTR2C,IL18,LYN,M…
3.AD/1.YC	Immature	Down	GO BP	GOBP_REGULATION_OF_CELL_DEATH	GOBP_REGULATION_OF_CELL_DEATH	0.609579	1.91208e-07	8.67607e-06	MERTK,UNC13B,PARK7,ADCYAP1,LRRK2,CNR1,CRH,CTNNA1,EDNRB,EGFR,FGFR2,FLNA,FOS,GJA1,GLI3,GPX4,SOX8,HSPA5,HSP90AB1,IGF1,INHBA,KIT,LRP2,KITLG,NOTCH1,PDGFRB,SEPTIN4,MAP2K6,PTN,RPS6,BMP7,BMPR1B,SOD1,SOX9,ZFP36L1,STK3,TGFB2,TGFBR1,UBB,VEGFA,VIP,CALR,KDM2B,CD38,HDAC4,PTPRC,RPL10,RPL11,MT3,GADD45A,RGCC,BCL2L1,RPL26,SOX4,NOX4,YAP1,TXNIP,NACC2,FOXO3,HIPK2,MITF,PAWR,WWOX,PSMD10,RARB,REST,RPS27A,SOX10,SP100,STA…
3.AD/1.YC	Immature	Down	GO BP	GOBP_TRANSMEMBRANE_TRANSPORT	GOBP_TRANSMEMBRANE_TRANSPORT	0.609579	1.91208e-07	8.67607e-06	MEF2A,CFTR,PARK7,AZIN2,DNAJC19,CRH,CRHBP,SLC9B1,DLG1,FLNA,PSME4,CLIC4,GJA1,HSPA2,HSPA5,IGF1,LRP2,OCA2,TESC,CHD7,SLC2A1,C3,TRPC3,UBB,PTPRC,ABCD2,PEX2,COX17,SLC39A11,SLC39A12,ATP6V1D,ATP6V0C,ATP6V0B,ATP6AP1,TMEM165,TTYH1,TRPM2,SLC30A4,ATP6V1F,WWP2,PSMD10,RPS27A,UBA52,UBC,PER2,FGF2,HTR2A,HTR2C,LYN,NEFL,PSMB6,PSMC3,PSMC5,RASGRF1,RGS4,PINK1,SLC9A3R1,HECW1,MID1IP1,ARPP19,KCNH5,PRKCB,HSPA8,TOMM7,CLU,RHO…
3.AD/1.YC	Immature	Down	GO BP	GOBP_REGULATION_OF_CELL_DEVELOPMENT	GOBP_REGULATION_OF_CELL_DEVELOPMENT	0.990026	1.93365e-07	8.70144e-06	SEMA3A,ADCYAP1,LRRK2,CTNNA1,EDNRB,ETV5,FLNA,GLI3,SOX8,IGF1,KIT,LRP2,NOTCH1,SERPINE2,PLAG1,CHD7,PTN,ROBO2,BMP7,SPP1,THRB,VEGFA,WNT3,CALR,HDAC4,TGFB1,RPS19,MT3,ATP6AP1,B2M,OLIG2,YAP1,CUX1,CUX2,REST,SOX10,NKX6-2,BHLHE40,PER2,FERMT2,DUSP10,LYN,NEFL,NTRK2,PAK1,SEMA4C,SEMA6A,SPRY4,ITGB1BP1,GPR37L1,CDC42,RAC1,CSPG5,DOCK1,SEMA3D,FSTL4,PLXND1,KANK1,MACF1,PLXNB2,LIMS1,LRP4,MAG,OMG,PLXNB1,CARMIL1,RELN,PREX1…
3.AD/1.YC	Immature	Down	GO BP	GOBP_REGULATION_OF_WNT_SIGNALING_PATHWAY	GOBP_REGULATION_OF_WNT_SIGNALING_PATHWAY	1.11109	2.09324e-07	9.34238e-06	LRRK2,EGFR,FGFR2,PSME4,SULF1,GLI3,NOTCH1,SOX9,STK3,WNT3,LGR5,TGFB1,ATP6V0C,SOX4,YAP1,WWOX,PPM1A,PSMD10,SOX2,SOX10,TCF7L2,SOX13,ATP6AP2,EGF,MDFIC,APOE,PSMB6,PSMC3,PSMC5,SLC9A3R1,RBX1,HECW1,DVL1,SPEF1,PPP1CA,LATS2,RACK1,TSC2,CXXC4,KANK1,MACF1,LRP4,LIMD1,SULF2,LRRK1,WNT5B,PLPP3,NXN,FZD6,ZNRF3,NKD1,TMEM131L,OTULIN,RBMS3,WLS,GPC5,PFDN5,PTPRU,TRABD2A,SNX3,DAAM2,CTNND1,EDA,WIF1,APCDD1,RNF220,JRK
3.AD/1.YC	Immature	Down	GO BP	GOBP_NEGATIVE_REGULATION_OF_MULTICELLULAR_ORGANISMAL_PROCESS	GOBP_NEGATIVE_REGULATION_OF_MULTICELLULAR_ORGANISMAL_PROCESS	0.742498	2.44074e-07	1.08047e-05	SEMA3A,MERTK,ADCY7,ADCYAP1,CRH,CRHBP,CTNNA1,DCN,EGFR,SULF1,GJA1,GLI3,SOX8,HSP90AB1,GPR149,IGF1,INHBA,NOTCH1,PDGFRA,SERPINE2,MAP2K6,PTN,ROBO2,BMP7,SOD1,SOX9,SPP1,STK3,TAC1,NR2F2,TGFB2,TGFBR1,TGFBR2,WNT3,CALR,CD9,CD38,PTPRC,TGFB1,RPS19,ABCD2,MT3,B2M,GADD45A,RGCC,HDAC5,JARID2,BCOR,RARB,REST,SOX10,SP100,STAT1,EZR,NKX6-2,KLF7,MLIP,IL33,ACVR2B,SH2B3,IRAK3,DUSP10,SPRED2,FGF2,ANGPT1,GSTP1,APOE,LYN,PAK1,S…
3.AD/1.YC	Immature	Down	GO BP	GOBP_REGULATION_OF_CELL_MORPHOGENESIS	GOBP_REGULATION_OF_CELL_MORPHOGENESIS	1.1799	2.62386e-07	1.14295e-05	DLG1,FLNA,HEXB,KIT,PTN,VEGFA,CALR,SEPTIN7,CUX1,CUX2,EZR,FERMT2,CSF1R,LPAR1,FGD2,SPRY4,ITGB1BP1,SLC9A3R1,CDC42,CFL1,DVL1,RAC1,EPS8,RHOB,DLC1,CSPG5,FMNL2,SYT2,CPNE9,DOCK1,NTNG1,PLXND1,KANK1,GRIP1,RHOQ,MACF1,PLXNB2,RND3,LIMS1,MSN,MYO10,ENPP2,PLXNB1,CARMIL1,RELN,RHOJ,ERMN,PREX1,SHROOM3,PTPRD,RHOU,CACNG7,SPARC,CDKL5,DOCK5,LIMD1,RIMS2,SEMA3E,RHOBTB1
3.AD/1.YC	Immature	Down	GO BP	GOBP_TAXIS	GOBP_TAXIS	0.874116	2.66808e-07	1.15299e-05	SEMA3A,EDNRB,GLI3,ITGA2,KIT,NOTCH1,PDGFRA,PDGFRB,PTN,ROBO2,BMP7,BMPR1B,TGFB2,VEGFA,WNT3,CALR,TGFB1,RPL24,RPS19,TRPM2,EZR,KLF7,CSF1R,DDT,LPAR1,EPHB1,FGF1,FGF2,FLT1,GFRA1,ANGPT1,GSTP1,HRAS,LYN,MET,MIF,SHC3,PPIA,SEMA4C,DOK5,SEMA6A,SYK,TPBG,C5,SCG2,TNFRSF11A,TUBB3,DVL1,EPHA3,TUBB2B,SBDS,RAC1,EXT1,PPIB,TSC2,ALCAM,SEMA3D,PALLD,PLXND1,PLXNB2,FLRT2,GAB1,GAP43,LAMA1,ANOS1,LAMA2,ENPP2,PIK3R1,PLXNB1,PRKCQ,R…
3.AD/1.YC	Immature	Down	GO BP	GOBP_POSITIVE_REGULATION_OF_CELL_PROJECTION_ORGANIZATION	GOBP_POSITIVE_REGULATION_OF_CELL_PROJECTION_ORGANIZATION	1.12569	2.71659e-07	1.16471e-05	ADCYAP1,CNR1,FLNA,HSPA5,ITGA2,KIT,PTN,ROBO2,BMP7,TGFBR1,VEGFA,WNT3,DYNLL1,HDAC4,SEPTIN7,CUX1,CUX2,ALK,HRAS,APOE,LYN,NEFL,NTRK2,PAK1,PLCE1,IQGAP1,CDC42,STMN2,DVL1,EPHA3,RAC1,FUT9,EPS8,ANLN,COBL,ZDHHC15,PLXND1,GRIP1,RHOQ,MACF1,PLXNB2,ENPP2,PIK3R1,PLXNB1,CARMIL1,RELN,PTPRD,SCN1B,CDKL5,FEZ1,SEPTIN9,GRN,PFN1,P2RY12,NME2,TOX,ATP1B2,AGRN,SERPINI1,SNX3,FNBP1L,ITGA6,MIEN1,DPYSL3
3.AD/1.YC	Immature	Down	GO BP	GOBP_REGULATION_OF_SECRETION	GOBP_REGULATION_OF_SECRETION	0.888493	2.93314e-07	1.24773e-05	UNC13B,CFTR,ADCYAP1,LRRK2,CNR1,CRH,CRHBP,EDNRB,EGFR,GJA1,IGF1,INHBA,NOTCH1,SEPTIN4,CHD7,MAP2K6,SLC2A1,SPP1,TAC1,TGFB2,VIP,DYNLL1,CD38,TGFB1,ATP6AP1,RGCC,SOX4,REST,SREBF1,TCF7L2,EZR,KLF7,PER2,ERP29,AGT,EGF,ERBB3,HTR2A,HTR2C,APOE,LYN,PPIA,PINK1,SYK,TLR4,TNFRSF11A,SLC9A3R1,CARTPT,DVL1,RAC1,PRKCB,CSPG5,SYT2,SGK1,CCK,RIMS2,GAB2,CPLX1,STXBP5,SYT9,MCTP2,SNCG,VAMP2,KMO,SYT12,CADPS2,RIMS3,KCNA2,KCNQ1,CACN…
3.AD/1.YC	Immature	Down	GO BP	GOBP_MITOCHONDRIAL_ELECTRON_TRANSPORT_NADH_TO_UBIQUINONE	GOBP_MITOCHONDRIAL_ELECTRON_TRANSPORT_NADH_TO_UBIQUINONE	2.36658	3.06584e-07	1.29407e-05	PARK7,PINK1,NDUFA2,NDUFC2,NDUFAB1,NDUFA11,NDUFS7,NDUFA3,NDUFA4,NDUFA5,NDUFB3,NDUFB4,NDUFB7,NDUFB8,NDUFB9,NDUFS5,NDUFS6,NDUFA13,NDUFB11
3.AD/1.YC	Immature	Down	GO BP	GOBP_CARBOHYDRATE_DERIVATIVE_BIOSYNTHETIC_PROCESS	GOBP_CARBOHYDRATE_DERIVATIVE_BIOSYNTHETIC_PROCESS	0.857405	3.09616e-07	1.29682e-05	GNPDA1,ADCY7,DCN,IGF1,PDGFRB,BMPR1B,TGFB1,ACSBG1,ELOVL6,TECR,MT3,ATP6V0C,TMEM165,MTAP,PAWR,TCF7L2,IL33,EGF,GCNT2,ANGPT1,PINK1,FUT9,EXT1,CSGALNACT1,NDST4,CSPG5,SDC2,UGT8,BCAN,XYLT1,PAPSS2,FASN,ATP5F1B,GCNT4,SCD,ATP5F1A,TMSB4X,ACSL3,ADCY5,ADCY8,NME2,FUT8,MAN2A1,GPC6,DDOST,BACE2,PDK4,ADCY2,PID1,VEGFB,SLC25A13,B3GAT2,B3GLCT,ST8SIA5,ACACB,MAN1A1,AMDHD2,GALNT7,CHST8,ST6GAL2,B4GAT1,SLC35D2,HS3ST5,GPC5,A…
3.AD/1.YC	Immature	Down	GO BP	GOBP_POSITIVE_REGULATION_OF_CELL_DIFFERENTIATION	GOBP_POSITIVE_REGULATION_OF_CELL_DIFFERENTIATION	0.786583	3.95214e-07	1.6427e-05	MEF2A,CTNNA1,ETS1,ETV5,FLNA,FOS,GJA1,GLI3,SOX8,HSP90AB1,IGF1,INHBA,KIT,LRP2,KITLG,NOTCH1,SERPINE2,PLAG1,TESC,PTN,ROBO2,BMP7,BMPR1B,SOX9,ZFP36L1,STK3,TGFB2,TGFBR1,TGFBR2,VEGFA,WNT3,CALR,PTPRC,TGFB1,ATP6AP1,RGCC,SOX4,OLIG2,YAP1,CUX1,FOXO3,CUX2,HIF1AN,RARB,REST,SOX2,SOX10,STAT1,TCF7L2,NKX6-2,ACVR2B,SOX13,FERMT2,DUSP10,AGT,MTURN,FGF2,NPNT,GCNT2,HTR2A,HTR2C,IL18,ITPKB,LYN,NEFL,NTRK2,PAK1,MAPK11,MAPK12…
3.AD/1.YC	Immature	Down	GO BP	GOBP_MITOCHONDRION_ORGANIZATION	GOBP_MITOCHONDRION_ORGANIZATION	0.925203	4.09934e-07	1.69098e-05	MEF2A,MGME1,PARK7,LRRK2,DNAJC19,DCN,EPAS1,IGF1,COX17,BCL2L1,PSMD10,SREBF1,BAG3,CAMKK2,ERBB4,PINK1,YWHAB,ARIH2,GABARAP,CNP,C11ORF65,FIS1,INF2,HSP90AA1,BID,SOD2,UBL5,GABARAPL2,ATG2A,CISD2,TOMM7,TIGAR,TSC2,USP30,CLU,RHOU,CCK,FEZ1,TOMM20,ATP5F1B,ATP5F1A,HIP1R,MAN2A1,NDUFA2,EYA2,NDUFC2,MLLT11,GHITM,MOAP1,PDCD5,PID1,COX7A1,TAZ,SLC25A5,NDUFAB1,ATP5MG,NDUFA11,NDUFS7,NDUFA3,NDUFA5,NDUFB3,NDUFB4,NDUFB7,NDU…
3.AD/1.YC	Immature	Down	GO BP	GOBP_POSITIVE_REGULATION_OF_PROTEIN_KINASE_ACTIVITY	GOBP_POSITIVE_REGULATION_OF_PROTEIN_KINASE_ACTIVITY	0.931537	4.34966e-07	1.78074e-05	ADCY7,PARK7,ADCYAP1,LRRK2,DLG1,EGFR,HSP90AB1,IGF1,KIT,KITLG,PDGFRB,MAP2K6,SOD1,STK3,TGFB2,TGFBR1,TGFBR2,UBB,VEGFA,PTPRC,TGFB1,MT3,TF,GADD45A,RGCC,ETAA1,NOX4,PSMD10,RPS27A,UBA52,UBC,CCND3,ERP29,FERMT2,MAP3K8,CSF1R,AGT,DUSP6,LPAR1,EGF,ERBB3,FGD2,FGF1,FGF2,FLT1,SASH1,PIK3R5,ALK,GNG3,ANGPT1,LAMTOR2,MDFIC,HRAS,HTR2A,IL18,MAP3K3,MAP3K11,NTRK2,PAK1,PLCE1,PPIA,MAPK11,RPS3,PINK1,SYK,TLR4,TRAF2,C5,RIPK2,TN…
3.AD/1.YC	Immature	Down	GO BP	GOBP_REGULATION_OF_PROTEIN_KINASE_ACTIVITY	GOBP_REGULATION_OF_PROTEIN_KINASE_ACTIVITY	0.794409	4.64632e-07	1.888e-05	CCNI,ADCY7,PARK7,ADCYAP1,LRRK2,DLG1,EGFR,HSP90AB1,IGF1,KIT,KITLG,PDGFRB,TESC,MAP2K6,BMP7,SOD1,STK3,NR2F2,TGFB2,TGFBR1,TGFBR2,UBB,VEGFA,PTPRC,TGFB1,MT3,TF,GADD45A,RGCC,ETAA1,NOX4,PSMD10,RPS27A,UBA52,UBC,CCND3,SH2B3,CAMKK2,ERP29,FERMT2,IRAK3,DUSP10,MAP3K8,CSF1R,AGT,DUSP6,LPAR1,EGF,SPRED2,ERBB3,FGD2,FGF1,FGF2,FLT1,SASH1,PIK3R5,ALK,GNG3,ANGPT1,LAMTOR2,GSTP1,MDFIC,HRAS,HTR2A,APOE,IL18,LYN,MAP3K3,MAP3K…
3.AD/1.YC	Immature	Down	GO BP	GOBP_POSITIVE_REGULATION_OF_PHOSPHORUS_METABOLIC_PROCESS	GOBP_POSITIVE_REGULATION_OF_PHOSPHORUS_METABOLIC_PROCESS	0.716575	5.07121e-07	2.04539e-05	MERTK,ADCY7,PARK7,ADCYAP1,LRRK2,CRH,DLG1,EDNRB,EGFR,FGFR2,HSPA2,HSP90AB1,IGF1,INHBA,ITGA2,KIT,KITLG,PDGFRA,PDGFRB,MAP2K6,BMP7,SOD1,SOX9,STK3,TGFB2,TGFBR1,TGFBR2,C3,UBB,VEGFA,DDR1,PTPRC,TGFB1,MT3,TF,GADD45A,RGCC,ETAA1,NOX4,HIPK2,PSMD10,RPS27A,UBA52,UBC,PARP9,CCND3,CAMKK2,ERP29,FERMT2,MAP3K8,CSF1R,AGT,DUSP6,LPAR1,EGF,EPHB1,ERBB3,ERBB4,FGD2,FGF1,FGF2,FGFR3,FLT1,SASH1,PIK3R5,ALK,GNG3,ANGPT1,LAMTOR2,M…
3.AD/1.YC	Immature	Down	GO BP	GOBP_ACTIN_FILAMENT_BUNDLE_ORGANIZATION	GOBP_ACTIN_FILAMENT_BUNDLE_ORGANIZATION	1.51302	6.83374e-07	2.73601e-05	FLNA,TAC1,TGFBR1,SPIRE2,RGCC,NOX4,PAWR,EZR,FERMT2,LPAR1,MET,PAK1,ITGB1BP1,CDC42,STMN1,RAC1,PHLDB2,EPS8,DLC1,SHROOM1,PIK3R1,CARMIL1,PLS3,PFN1,ACTG1,RAPGEF3,CALD1,ELN,MYO1B,ZYX,SYNPO2,DPYSL3,MARCKS,ASAP3,AIF1L,CGNL1
3.AD/1.YC	Immature	Down	GO BP	GOBP_PROTEIN_KINASE_B_SIGNALING	GOBP_PROTEIN_KINASE_B_SIGNALING	1.24019	7.68285e-07	3.04342e-05	MERTK,PARK7,DLG1,EGFR,FGFR2,HSP90AB1,IGF1,KIT,LRP2,KITLG,PDGFRA,PDGFRB,PLEKHA1,SOX9,ZFP36L1,STK3,TGFBR1,TGFB1,MT3,TCF7L2,SH2B3,FERMT2,EGF,ERBB3,ERBB4,FGF1,FGF2,FGFR3,PHLPP1,PIK3R5,GCNT2,ANGPT1,IL18,MET,NTRK2,PINK1,TPBG,ITGB1BP1,SLC9A3R1,RAC1,HSP90AA1,RACK1,TSC2,GAB1,PIK3R1,P2RY12,CD86,CX3CR1,F3,HIP1
3.AD/1.YC	Immature	Down	GO BP	GOBP_ACTIN_FILAMENT_ORGANIZATION	GOBP_ACTIN_FILAMENT_ORGANIZATION	0.996443	7.71334e-07	3.04342e-05	CTNNA1,DLG1,FLNA,TAC1,TGFBR1,SPIRE2,TF,RGCC,NOX4,PAWR,EZR,FERMT2,LPAR1,MET,PAK1,RGS4,ITGB1BP1,CDC42,CFL1,STMN1,RAC1,PHLDB2,EPS8,RHOB,COBL,DLC1,SHROOM1,CTNNA2,KANK1,RND3,PIK3R1,CARMIL1,ERMN,PREX1,SHROOM3,RHOBTB1,SVIL,FMN1,PLS3,CTNNA3,MYO1E,PFN1,TMSB4X,HIP1R,ACTG1,GSN,ARPC5,IQGAP2,RAPGEF3,CALD1,WIPF1,ELMO1,ELN,HIP1,ARFIP2,MYO1B,FCHSD2,ARHGAP25,ZYX,EFS,CFL2,PLEKHH2,SYNPO2,DPYSL3,FAT1,MARCKS,MYO1F,AS…
3.AD/1.YC	Immature	Down	GO BP	GOBP_REGULATION_OF_MAP_KINASE_ACTIVITY	GOBP_REGULATION_OF_MAP_KINASE_ACTIVITY	1.13646	8.06812e-07	3.1605e-05	LRRK2,EGFR,IGF1,KIT,KITLG,PDGFRB,MAP2K6,BMP7,SOD1,UBB,VEGFA,PTPRC,TGFB1,TF,GADD45A,RPS27A,UBA52,UBC,SH2B3,ERP29,IRAK3,DUSP10,AGT,DUSP6,LPAR1,EGF,SPRED2,FGD2,FGF1,FGF2,FLT1,SASH1,PIK3R5,ALK,GNG3,GSTP1,MDFIC,HRAS,HTR2A,APOE,LYN,MAP3K11,PAK1,PLCE1,PPIA,MAPK11,RGS3,RGS4,RPS3,AIDA,SYK,TLR4,TRAF2,C5,SPRY4,RIPK2,TNFRSF11A,IQGAP1
3.AD/1.YC	Immature	Down	GO BP	GOBP_CYTOPLASMIC_TRANSLATION	GOBP_CYTOPLASMIC_TRANSLATION	1.77466	8.42325e-07	3.27604e-05	RPL29,RPL6,RPL11,RPL24,RPL38,RPSA,RPL26,RPL13A,RPL10A,RPL8,RPL9,RPL15,RPL17,RPL18A,RPL19,RPL30,RPL31,RPL32,RPL35A,RPL41,RPL36A,RPLP2,RPS21,RPS23,RPS26,RPS29,CPEB2
3.AD/1.YC	Immature	Down	GO BP	GOBP_POSITIVE_REGULATION_OF_CELL_DEATH	GOBP_POSITIVE_REGULATION_OF_CELL_DEATH	0.849391	1.01926e-06	3.89238e-05	UNC13B,PARK7,LRRK2,CNR1,CRH,CTNNA1,FOS,INHBA,NOTCH1,PDGFRB,SEPTIN4,MAP2K6,PTN,RPS6,BMP7,BMPR1B,SOD1,STK3,TGFB2,TGFBR1,UBB,HDAC4,PTPRC,RPL11,MT3,GADD45A,RGCC,BCL2L1,RPL26,SOX4,NOX4,TXNIP,NACC2,FOXO3,PAWR,WWOX,RARB,REST,RPS27A,UBA52,UBC,AGT,DUSP6,LPAR1,FGD2,LYN,MAP3K11,RPS3,SYK,TIMP3,TLR4,TRAF2,RIPK2,ZNF622,SLC9A3R1,RASSF2,CDC42,RPS7,BARD1,FIS1,PPP1CA,FAP,LATS2,PRMT2,RHOB,BID,RACK1,HBB,SOD2,SAP18,T…
3.AD/1.YC	Immature	Down	GO BP	GOBP_OLIGODENDROCYTE_DEVELOPMENT	GOBP_OLIGODENDROCYTE_DEVELOPMENT	2.50388	1.02074e-06	3.89238e-05	EIF2B2,SOX10,NKX6-2,LPAR1,GSTP1,LYN,CLU,MAG,KCNJ10,PLP1,GSN,ASPA,FA2H,MYRF,MOBP,OLIG1
3.AD/1.YC	Immature	Down	GO BP	GOBP_PHOSPHATIDYLINOSITOL_3_KINASE_SIGNALING	GOBP_PHOSPHATIDYLINOSITOL_3_KINASE_SIGNALING	1.50924	1.02224e-06	3.89238e-05	DCN,EGFR,IGF1,KIT,PDGFRA,PDGFRB,SERPINE2,PLEKHA1,SOX9,ZFP36L1,TGFB2,AGT,EGF,ERBB3,ERBB4,FGF2,FLT1,PIK3R5,ANGPT1,HTR2A,IL18,LYN,NTRK2,SLC9A3R1,STAMBP,MYO16,TSC2,GAB1,PIK3R1,PLXNB1,PREX2,PIP4K2A,PRR5L,PIK3IP1,PIP4K2C
3.AD/1.YC	Immature	Down	GO BP	GOBP_REGULATION_OF_SYSTEM_PROCESS	GOBP_REGULATION_OF_SYSTEM_PROCESS	0.864717	1.28395e-06	4.85493e-05	MEF2A,SEMA3A,UNC13B,LRRK2,CRH,CRHBP,DLG1,EDNRB,EGFR,EPAS1,FLNA,GJA1,IGF1,INHBA,ITGA2,KIT,NOTCH1,SOD1,TAC1,TGFB2,THRB,TRPC3,VIP,CD38,HDAC4,FOXO3,CUX2,JARID2,SOX10,SREBF1,PER2,MLIP,AGT,HTR2A,HTR2C,APOE,PAK1,PLCE1,RGS4,SLC9A3R1,CARTPT,DVL1,LMNA,C12ORF57,MAG,RELN,CACNG7,SCN1B,SGK1,DOCK5,CCK,RIMS2,CALM2,IL6ST,ATP1A2,CTNNA3,KCNN2,KCNQ1,SCN4B,CACNB3,CACNA1G,ADRB1,MGLL,CYP2J2,HRH2,HIP1R,ITGAX,ITPR1,ITPR2…
3.AD/1.YC	Immature	Down	GO BP	GOBP_POSITIVE_REGULATION_OF_CELLULAR_COMPONENT_BIOGENESIS	GOBP_POSITIVE_REGULATION_OF_CELLULAR_COMPONENT_BIOGENESIS	0.892945	1.41198e-06	5.30224e-05	UNC13B,PARK7,COL16A1,DLG1,FLNA,KIT,BMP7,SOX9,TAC1,TGFBR1,VEGFA,SPIRE2,DYNLL1,HDAC4,SEPTIN7,TGFB1,RGCC,NOX4,CUX2,GPSM2,FERMT2,AGT,LPAR1,EPHB1,HRAS,MET,NTRK2,PAK1,PLCE1,PSMC3,PSMC5,RPS3,PINK1,SYK,TLR4,TPBG,IQGAP1,ITGB1BP1,RBX1,CDC42,STUB1,PHLDB1,RAC1,PHLDB2,EPS8,HSP90AA1,ANLN,BID,RACK1,COBL,CLU,CTNNA2,RHOQ,FLRT2,LIMS1,MSN,PIK3R1,CARMIL1,PTPRD,SLITRK2,CCK,SEPTIN9,FMN1,PIP4K2A,PFN1,P2RY12,HIP1R,GSN,A…
3.AD/1.YC	Immature	Down	GO BP	GOBP_REGULATION_OF_NERVOUS_SYSTEM_DEVELOPMENT	GOBP_REGULATION_OF_NERVOUS_SYSTEM_DEVELOPMENT	0.980825	1.46809e-06	5.47516e-05	SEMA3A,ADCYAP1,CTNNA1,DLG1,ETV5,GLI3,SOX8,KIT,LRP2,NOTCH1,SERPINE2,PLAG1,CHD7,PTN,ROBO2,BMP7,SPP1,VEGFA,WNT3,TGFB1,MT3,B2M,OLIG2,YAP1,CUX1,CUX2,RARB,REST,SOX10,NKX6-2,BHLHE40,PER2,DUSP10,EPHB1,LYN,NEFL,NTRK2,PAK1,SEMA4C,SEMA6A,TPBG,GPR37L1,SEMA3D,FSTL4,PLXND1,MACF1,PLXNB2,FLRT2,LRP4,MAG,OMG,PLXNB1,RELN,DIP2B,PTPRD,CDKL5,SEMA3B,SEMA6D,SLITRK2,SEMA3E,IL6ST,MAN2A1,ITGAX,CX3CR1,GRID2,IDH2,AGRN,ASPA,M…
3.AD/1.YC	Immature	Down	GO BP	GOBP_POSITIVE_REGULATION_OF_ANION_TRANSPORT	GOBP_POSITIVE_REGULATION_OF_ANION_TRANSPORT	0.926619	1.4849e-06	5.50019e-05	MEF2A,UNC13B,CFTR,AZIN2,ADCYAP1,CRH,EGFR,FLNA,GJA1,GLI3,HSP90AB1,IGF1,MAP2K6,SPP1,TAC1,TGFB2,C3,VIP,DYNLL1,CD38,TGFB1,SOX4,PPM1A,TCF7L2,EZR,BAG3,HRAS,APOE,PAK1,PPIA,PINK1,TLR4,YWHAB,TNFRSF11A,ITGB1BP1,CDC42,CARTPT,ARIH2,MTCL1,RAC1,FIS1,ARPP19,BID,RACK1,UBL5,TOMM7,RHOQ,PIK3R1,RHOU,ACTB,CCK,VAMP2,KMO,CACNB3,CA2,PRR5L,ACSL3,PLA2G4A,ADCY8,PHPT1,VSNL1,MYO18A,PRNP,SYTL4,PLA2R1,PDCD5,RAPGEF3,SLC12A2,ABC…
3.AD/1.YC	Immature	Down	GO BP	GOBP_CELL_CELL_SIGNALING_BY_WNT	GOBP_CELL_CELL_SIGNALING_BY_WNT	0.89877	1.53227e-06	5.63729e-05	LRRK2,EGFR,FGFR2,PSME4,SULF1,GLI3,NDP,NOTCH1,SOX9,STK3,UBB,WNT3,LGR5,TGFB1,ATP6V0C,SOX4,YAP1,MITF,WWOX,PPM1A,PSMD10,RPS27A,SOX2,SOX10,TCF7L2,UBA52,UBC,SOX13,ATP6AP2,FERMT2,EGF,MDFIC,APOE,PSMB6,PSMC3,PSMC5,NDRG2,SLC9A3R1,RBX1,CDC42,HECW1,DVL1,SPEF1,RAC1,EXT1,PPP1CA,LATS2,WDR61,RACK1,TSC2,CXXC4,KANK1,MACF1,LRP4,LIMD1,SULF2,LRRK1,WNT5B,AMOTL1,PFN1,PLPP3,NXN,GPC6,AP2M1,FZD6,ZNRF3,NKD1,TMEM131L,OTULIN…
3.AD/1.YC	Immature	Down	GO BP	GOBP_POSITIVE_REGULATION_OF_EPITHELIAL_CELL_MIGRATION	GOBP_POSITIVE_REGULATION_OF_EPITHELIAL_CELL_MIGRATION	1.49225	1.73107e-06	6.32597e-05	ETS1,ITGA2,SOX9,TAC1,TGFB2,TGFBR2,VEGFA,CALR,TGFB1,CTSH,AGT,EGF,FGF1,FGF2,SASH1,ANGPT1,MAP3K3,MET,JCAD,ITGB1BP1,RAC1,RHOB,DOCK1,ENPP2,RHOJ,SPARC,DOCK5,ATP5F1B,GRN,ATP5F1A,PFN1,EPB41L4B,TMSB4X,PLPP3
3.AD/1.YC	Immature	Down	GO BP	GOBP_CARBOHYDRATE_DERIVATIVE_METABOLIC_PROCESS	GOBP_CARBOHYDRATE_DERIVATIVE_METABOLIC_PROCESS	0.653228	1.76501e-06	6.40698e-05	GNPDA1,ADCY7,PARK7,LRRK2,DCN,DLG1,SULF1,HEXB,HMGCS1,IGF1,KIT,PDGFRB,BMPR1B,HDAC4,TGFB1,ACSBG1,ELOVL6,TECR,MT3,ATP6V0C,TMEM165,MTAP,AASS,PAWR,TCF7L2,IL33,EGF,FGF2,GCNT2,ANGPT1,HTR2A,PDE8A,PINK1,GAPDH,FUT9,EXT1,CSGALNACT1,NDST4,AOAH,TIGAR,CSPG5,RHOQ,SDC2,UGT8,PEMT,SULF2,BCAN,XYLT1,PAPSS2,FASN,ATP5F1B,GCNT4,ALDH1A1,SCD,ATP5F1A,ADAMTS9,TMSB4X,ACSL3,ADCY5,ADCY8,NME2,FUT8,MAN2A1,GPC6,HGSNAT,CST3,CTSL,D…
3.AD/1.YC	Immature	Down	GO BP	GOBP_REGULATION_OF_PHOSPHATIDYLINOSITOL_3_KINASE_SIGNALING	GOBP_REGULATION_OF_PHOSPHATIDYLINOSITOL_3_KINASE_SIGNALING	1.59374	1.83313e-06	6.61019e-05	DCN,EGFR,IGF1,KIT,PDGFRA,PDGFRB,SERPINE2,SOX9,TGFB2,AGT,EGF,ERBB3,ERBB4,FGF2,FLT1,PIK3R5,ANGPT1,IL18,LYN,NTRK2,SLC9A3R1,STAMBP,TSC2,GAB1,PIK3R1,PLXNB1,PIP4K2A,PRR5L,PIK3IP1,PIP4K2C
3.AD/1.YC	Immature	Down	GO BP	GOBP_POSITIVE_REGULATION_OF_PROTEIN_KINASE_B_SIGNALING	GOBP_POSITIVE_REGULATION_OF_PROTEIN_KINASE_B_SIGNALING	1.43419	1.8974e-06	6.76521e-05	PARK7,EGFR,FGFR2,HSP90AB1,KIT,LRP2,KITLG,PDGFRA,PDGFRB,STK3,TGFBR1,TGFB1,TCF7L2,FERMT2,EGF,ERBB3,ERBB4,FGF1,FGF2,FGFR3,PIK3R5,GCNT2,ANGPT1,IL18,MET,PINK1,TPBG,ITGB1BP1,RAC1,HSP90AA1,GAB1,PIK3R1,P2RY12,CD86,CX3CR1,F3,HIP1
3.AD/1.YC	Immature	Down	GO BP	GOBP_NEGATIVE_REGULATION_OF_ANION_TRANSPORT	GOBP_NEGATIVE_REGULATION_OF_ANION_TRANSPORT	1.33386	1.96278e-06	6.93981e-05	PARK7,LRRK2,CNR1,CRH,CRHBP,WWP2,REST,SP100,SREBF1,KLF7,BAG3,ERP29,EGF,ANGPT1,MDFIC,APOE,RGS4,ITGB1BP1,CARTPT,BARD1,C11ORF65,FIS1,PRKCB,APOD,PKDCC,P2RY12,VSNL1,JAGN1,SVIP,PFKL,SYTL4,PLA2R1,PID1,CYP51A1,IDH2,ENHO,MIDN,OAZ1,YOD1,SNX3,CABP1
3.AD/1.YC	Immature	Down	GO BP	GOBP_POSITIVE_REGULATION_OF_MOLECULAR_FUNCTION	GOBP_POSITIVE_REGULATION_OF_MOLECULAR_FUNCTION	0.541623	1.98052e-06	6.95737e-05	MERTK,CFTR,ADCY7,PARK7,AZIN2,ADCYAP1,LRRK2,DNAJC19,DLG1,EGFR,FGFR2,PSME4,HSPA2,HSP90AB1,IGF1,ITGA2,KIT,KITLG,NDP,PCNA,PDGFRA,PDGFRB,TESC,MAP2K6,SOD1,STK3,TGFB2,TGFBR1,TGFBR2,UBB,VEGFA,DDR1,ARID5B,DYNLL1,HDAC4,PTPRC,TGFB1,RPL11,RPS27L,COX17,ARHGAP1,MT3,B2M,TF,GADD45A,RGCC,ETAA1,CDC14B,NOX4,HDAC5,HIPK2,PSMD10,REST,RPS27A,TCF7L2,UBA52,UBC,PARP9,CCND3,ERP29,FERMT2,IRAK3,MAP3K8,CSF1R,CTSH,AGT,DUSP6,LP…
3.AD/1.YC	Immature	Down	GO BP	GOBP_PURINE_CONTAINING_COMPOUND_BIOSYNTHETIC_PROCESS	GOBP_PURINE_CONTAINING_COMPOUND_BIOSYNTHETIC_PROCESS	1.2943	2.2149e-06	7.73087e-05	ADCY7,TGFB1,ACSBG1,ELOVL6,TECR,ATP6V0C,MTAP,PINK1,PAPSS2,FASN,ATP5F1B,SCD,ATP5F1A,TMSB4X,ACSL3,ADCY5,ADCY8,NME2,PDK4,ADCY2,PID1,SLC25A13,ACACB,ACSS2,ACSS1,ACAT1,HSD17B12,PDP1,SHMT1,SCD5,ATP5MG,ATP5F1C,ATP5F1D,ATP5F1E,ATP5MC1,ATP5MC3,ATP5ME,ATP5PF,PRPS2,AK2,NT5E,GUK1
3.AD/1.YC	Immature	Down	GO BP	GOBP_NEGATIVE_REGULATION_OF_ESTABLISHMENT_OF_PROTEIN_LOCALIZATION	GOBP_NEGATIVE_REGULATION_OF_ESTABLISHMENT_OF_PROTEIN_LOCALIZATION	1.60843	2.27923e-06	7.90472e-05	PARK7,LRRK2,WWP2,REST,SP100,SREBF1,KLF7,BAG3,ERP29,ANGPT1,MDFIC,APOE,ITGB1BP1,BARD1,C11ORF65,APOD,PKDCC,VSNL1,JAGN1,SVIP,PFKL,SYTL4,CYP51A1,IDH2,ENHO,MIDN,YOD1,SNX3,CABP1
3.AD/1.YC	Immature	Down	GO BP	GOBP_EXOCYTOSIS	GOBP_EXOCYTOSIS	0.70375	2.3537e-06	8.09583e-05	UNC13B,CFTR,MAGED2,LRRK2,CNR1,CRHBP,FLNA,HEXB,HSP90AB1,IGF1,KIT,NOTCH1,SEPTIN4,SOD1,TGFB2,C3,VEGFA,DYNLL1,CD9,PTPRC,TGFB1,FTH1,FTL,ATP6V1D,ATP6V0C,ATP6AP1,B2M,TF,TRPM2,FRK,REST,ATP6AP2,CTSH,EGF,LAMTOR2,GSTP1,HTR2A,LYN,MIF,PAK1,PPIA,PSMC3,SYK,TIMP2,TIMP3,IQGAP1,TUBB4B,DVL1,TUBB,RAC1,TUBA4A,HSP90AA1,PRKCB,HBB,HSPA8,CSPG5,CLU,SYT2,SPARC,RIMS2,GAB2,CYBB,OSTF1,SRGN,CPLX1,STXBP5,SYT9,VAMP2,SYT12,CADPS2…
3.AD/1.YC	Immature	Down	GO BP	GOBP_POSITIVE_REGULATION_OF_ION_TRANSPORT	GOBP_POSITIVE_REGULATION_OF_ION_TRANSPORT	0.798149	2.36407e-06	8.09583e-05	MEF2A,UNC13B,CFTR,AZIN2,ADCYAP1,CRH,DLG1,EGFR,FLNA,GJA1,GLI3,HSPA2,HSP90AB1,IGF1,PDGFRB,TESC,MAP2K6,SPP1,TAC1,TGFB2,C3,TRPC3,VIP,DYNLL1,CD38,TGFB1,COX17,SOX4,PPM1A,TCF7L2,EZR,BAG3,CNKSR3,HRAS,APOE,PAK1,PPIA,PINK1,TLR4,YWHAB,TNFRSF11A,ITGB1BP1,SLC9A3R1,CDC42,CARTPT,ARIH2,MTCL1,RAC1,FIS1,ARPP19,BID,RACK1,UBL5,TOMM7,RHOQ,PIK3R1,RELN,RHOU,ACTB,SCN1B,CCK,CALM2,VAMP2,KMO,KCNQ1,SCN4B,CACNB3,CA2,P2RY12,T…
3.AD/1.YC	Immature	Down	GO BP	GOBP_CATION_TRANSPORT	GOBP_CATION_TRANSPORT	0.635332	2.46017e-06	8.37226e-05	MAGED2,PARK7,ADCYAP1,CNR1,CRH,CRHBP,SLC9B1,DLG1,FLNA,GJA1,HSPA2,LRP2,PDGFRB,SERPINE2,TESC,CHD7,TRPC3,VIP,PTPRC,COX17,SLC39A11,SLC39A12,FTH1,FTL,ARHGAP1,MT3,ATOX1,ATP6V1D,ATP6V0C,ATP6V0B,ATP6AP1,SLC48A1,TMEM165,B2M,TTYH1,TF,TRPM2,SLC30A4,ATP6V1F,HEPH,WWP2,CNKSR3,EGF,FGF2,HTR2A,HTR2C,LYN,NEFL,RASGRF1,RGS4,PINK1,SYK,SLC9A3R1,HECW1,KCNH5,PRKCB,SYT2,RELN,CACNG7,SCN1B,SGK1,CALM2,ATP5F1B,KCNJ10,ATP1A2,S…
3.AD/1.YC	Immature	Down	GO BP	GOBP_REGULATION_OF_CHEMOTAXIS	GOBP_REGULATION_OF_CHEMOTAXIS	1.25701	2.52414e-06	8.49418e-05	SEMA3A,ITGA2,NOTCH1,PDGFRA,PDGFRB,PTN,ROBO2,VEGFA,WNT3,CALR,TGFB1,CSF1R,DDT,LPAR1,FGF1,FGF2,GSTP1,LYN,MET,MIF,SEMA4C,SEMA6A,TPBG,C5,SCG2,TUBB2B,RAC1,SEMA3D,ZSWIM6,SEMA3B,SEMA6D,SEMA3E,IL6R,DPP4,P2RY12,TMSB4X,PADI2,MOSPD2,F3,VEGFB,RIN3,DAPK2,MTUS1,CXCL14
3.AD/1.YC	Immature	Down	GO BP	GOBP_POSITIVE_REGULATION_OF_PROTEIN_SERINE_THREONINE_KINASE_ACTIVITY	GOBP_POSITIVE_REGULATION_OF_PROTEIN_SERINE_THREONINE_KINASE_ACTIVITY	1.08675	2.53053e-06	8.49418e-05	LRRK2,EGFR,HSP90AB1,IGF1,KIT,KITLG,PDGFRB,MAP2K6,SOD1,STK3,UBB,VEGFA,PTPRC,TGFB1,TF,GADD45A,RGCC,ETAA1,PSMD10,RPS27A,UBA52,UBC,CCND3,ERP29,FERMT2,CSF1R,AGT,DUSP6,LPAR1,EGF,FGD2,FGF1,FGF2,FLT1,SASH1,PIK3R5,ALK,GNG3,MDFIC,HRAS,HTR2A,MAP3K11,PAK1,PLCE1,PPIA,MAPK11,RPS3,SYK,TLR4,TRAF2,C5,RIPK2,TNFRSF11A,IQGAP1,CCND2,CALM2,SLC27A1
3.AD/1.YC	Immature	Down	GO BP	GOBP_MEMBRANE_ORGANIZATION	GOBP_MEMBRANE_ORGANIZATION	0.684389	2.54279e-06	8.49418e-05	CFTR,AZIN2,DLG1,EGFR,ITGA2,LRP2,MFGE8,PTN,SOD1,TGFB2,C3,UBB,CALR,SPIRE2,CD9,PTPRC,ABCD2,MT3,TF,BCL2L1,RPS27A,UBA52,UBC,EGF,APOE,MBP,PPIA,PINK1,YWHAB,SLC9A3R1,CDC42,CNP,DVL1,LMNA,RAC1,HSP90AA1,PRKCB,BID,HSPA8,CLU,SYT2,DOCK1,LRP4,PTPRD,ACTB,CNTN2,RHOBTB1,SEPTIN8,PIP4K2A,ATP5F1B,CPLX1,SYT9,VAMP2,MTSS1,ATP5F1A,HIP1R,SEC24D,COL5A1,EYA2,AP2M1,ACTG1,RFTN1,DOCK2,GSN,ARPC5,NDRG1,RAB31,CTSL,MYO18A,PLSCR1,T…
3.AD/1.YC	Immature	Down	GO BP	GOBP_DEVELOPMENTAL_GROWTH	GOBP_DEVELOPMENTAL_GROWTH	0.83179	2.6105e-06	8.66718e-05	SEMA3A,FGFR2,CLIC4,GJA1,GLI3,HSP90AB1,TNC,GPR149,IGF1,NOTCH1,PDGFRB,PLAG1,CHD7,PTN,PLEKHA1,BMPR1B,SOD1,SOX9,SPP1,ZFP36L1,STK3,TGFB2,TGFBR1,TGFBR2,VEGFA,WNT3,DDR1,ARID5B,ADAM15,CD9,MT3,YAP1,JARID2,RARB,SOX2,SOX10,EZR,DUSP10,DUSP6,ERBB4,FGF1,FGF2,FGFR3,APOE,PAK1,SEMA4C,MAPK11,SEMA6A,RGS4,IQGAP1,ARIH2,DVL1,SBDS,EXT1,LATS2,PRMT2,HSP90AA1,APOD,PPIB,COBL,SYT2,CPNE9,ALCAM,SEMA3D,FSTL4,MACF1,GAP43,LRP4,M…
3.AD/1.YC	Immature	Down	GO BP	GOBP_REGULATION_OF_PHOSPHORUS_METABOLIC_PROCESS	GOBP_REGULATION_OF_PHOSPHORUS_METABOLIC_PROCESS	0.555399	2.71826e-06	8.97027e-05	MERTK,CCNI,ADCY7,PARK7,ADCYAP1,LRRK2,DNAJC19,CRH,DLG1,EDNRB,EGFR,FGFR2,HSPA2,HSP90AB1,IGF1,INHBA,ITGA2,KIT,KITLG,PDGFRA,PDGFRB,TESC,MAP2K6,PTN,BMP7,SOD1,SOX9,STK3,NR2F2,TGFB2,TGFBR1,TGFBR2,C3,UBB,VEGFA,DDR1,DYNLL1,HDAC4,PTPRC,TGFB1,MT3,TF,GADD45A,RGCC,ETAA1,NOX4,HIPK2,PSMD10,RBL1,RPS27A,UBA52,UBC,PARP9,CCND3,SH2B3,CAMKK2,ERP29,FERMT2,IRAK3,DUSP10,MAP3K8,CSF1R,SH3RF2,CNKSR3,BMPER,AGT,DUSP6,LPAR1,E…
3.AD/1.YC	Immature	Down	GO BP	GOBP_INNER_MITOCHONDRIAL_MEMBRANE_ORGANIZATION	GOBP_INNER_MITOCHONDRIAL_MEMBRANE_ORGANIZATION	2.16549	2.87743e-06	9.43833e-05	PINK1,ATP5F1B,ATP5F1A,GHITM,TAZ,ATP5MG,ATP5F1C,NDUFA13,ATP5F1D,ATP5F1E,ATP5MC1,ATP5MC3,ATP5ME,ATP5PF,TIMM13,TIMM8B,MICOS13,MICOS10
3.AD/1.YC	Immature	Down	GO BP	GOBP_POSITIVE_REGULATION_OF_MAP_KINASE_ACTIVITY	GOBP_POSITIVE_REGULATION_OF_MAP_KINASE_ACTIVITY	1.22399	2.90859e-06	9.48339e-05	LRRK2,EGFR,IGF1,KIT,KITLG,PDGFRB,MAP2K6,SOD1,UBB,VEGFA,PTPRC,TGFB1,TF,GADD45A,RPS27A,UBA52,UBC,ERP29,AGT,DUSP6,LPAR1,EGF,FGD2,FGF1,FGF2,FLT1,SASH1,PIK3R5,ALK,GNG3,MDFIC,HRAS,HTR2A,MAP3K11,PAK1,PLCE1,PPIA,MAPK11,RPS3,SYK,TLR4,TRAF2,C5,RIPK2,TNFRSF11A,IQGAP1
3.AD/1.YC	Immature	Down	GO BP	GOBP_ENERGY_DERIVATION_BY_OXIDATION_OF_ORGANIC_COMPOUNDS	GOBP_ENERGY_DERIVATION_BY_OXIDATION_OF_ORGANIC_COMPOUNDS	1.13044	2.99167e-06	9.6962e-05	PARK7,IGF1,MT3,PRDM16,PER2,PINK1,PPP1CA,BID,TIGAR,IL6ST,NDUFA2,ADGRF5,NDUFC2,GHITM,PID1,TAZ,IDH2,SLC25A13,SLC25A18,ETFB,NDUFAB1,SUCLG2,SUCLA2,UQCR11,NDUFA11,COX4I1,COX5B,COX6A1,COX6B1,COX6C,COX7B,COX7C,COX8A,OPN3,UQCR10,NDUFS7,NDUFA3,NDUFA4,NDUFA5,NDUFB3,NDUFB4,NDUFB7,NDUFB8,NDUFB9,NDUFS5,NDUFS6,NDUFA13,ATP5F1D,NDUFB11,UQCRB,UQCRH,COX5A
3.AD/1.YC	Immature	Down	GO BP	GOBP_APOPTOTIC_SIGNALING_PATHWAY	GOBP_APOPTOTIC_SIGNALING_PATHWAY	0.83431	3.55482e-06	0.000114532	PARK7,LRRK2,CRH,CTNNA1,IGF1,INHBA,KITLG,SEPTIN4,BMPR1B,SOD1,STK3,TGFB2,TGFBR1,UBB,CD38,PTPRC,TGFB1,RPL11,RPS27L,BCL2L1,RPL26,YAP1,NACC2,HIPK2,PAWR,WWOX,PSMD10,SP100,TCF7L2,IL33,BAG3,ERP29,AGT,ERBB3,FGFR3,GSTP1,HRAS,MIF,PPIA,SH3RF1,RPS3,PINK1,TIMP3,TLR4,TRAF2,YWHAB,SCG2,ZNF622,SLC9A3R1,RRP8,RPS7,RFFL,GABARAP,FIS1,PPP1CA,CDKN2D,BID,RACK1,SOD2,TAF9,CLU,PIK3R1,CCK,SST,IL6R,HIP1R,EYA2,ITPR1,SELENOK,TM…
3.AD/1.YC	Immature	Down	GO BP	GOBP_NEGATIVE_REGULATION_OF_INTRACELLULAR_SIGNAL_TRANSDUCTION	GOBP_NEGATIVE_REGULATION_OF_INTRACELLULAR_SIGNAL_TRANSDUCTION	0.892442	3.58066e-06	0.000114687	PARK7,LRRK2,DLG1,SERPINE2,PLEKHA1,BMP7,TGFB2,PTPRC,BCL2L1,PPM1A,PSMD10,STAT1,EZR,SH2B3,IRAK3,DUSP10,SH3RF2,CNKSR3,AGT,DUSP6,LPAR1,SPRED2,PHLPP1,GSTP1,APOE,LYN,MET,MIF,PEBP1,PPIA,NDRG2,SEMA6A,RGS3,RGS4,AIDA,PINK1,TIMP2,TIMP3,TLR4,SPRY4,ITGB1BP1,SLC9A3R1,RASSF2,RFFL,RNF152,RNF125,STMN1,STMN3,CDKN2D,STAMBP,BID,RACK1,SOD2,TSC2,TAF9,DLC1,CLU,KANK1,LIMD1,ADIPOR1,TMSB4X,ITPR1,PRNP,RORA,CD22,CARD8,PDE4D,…
3.AD/1.YC	Immature	Down	GO BP	GOBP_NEGATIVE_REGULATION_OF_NEURON_PROJECTION_DEVELOPMENT	GOBP_NEGATIVE_REGULATION_OF_NEURON_PROJECTION_DEVELOPMENT	1.53552	3.80842e-06	0.000121268	SEMA3A,LRRK2,FLNA,SPP1,WNT3,CD38,MT3,B2M,LPAR1,APOE,SEMA4C,SEMA6A,MYLIP,STMN2,SEMA3D,FSTL4,KANK1,LRP4,MAG,OMG,DIP2B,SEMA3B,SEMA6D,SEMA3E,PTPRG,LGALS1,VIM,PTPN9,ITM2C,DPYSL3,DENND5A
3.AD/1.YC	Immature	Down	GO BP	GOBP_NUCLEOBASE_CONTAINING_SMALL_MOLECULE_METABOLIC_PROCESS	GOBP_NUCLEOBASE_CONTAINING_SMALL_MOLECULE_METABOLIC_PROCESS	0.80758	3.86001e-06	0.000122196	GNPDA1,ADCY7,PARK7,LRRK2,DLG1,HMGCS1,IGF1,HDAC4,TGFB1,ACSBG1,ELOVL6,TECR,ATP6V0C,CPS1,MTAP,AASS,PARP9,HTR2A,PDE8A,PINK1,CNP,GAPDH,CSGALNACT1,TIGAR,RHOQ,PEMT,PAPSS2,FASN,ATP5F1B,KMO,SCD,ATP5F1A,TMSB4X,ACSL3,ADCY5,ADCY8,NME2,FUT8,ENPP4,ALDOC,DERA,PFKL,PGAM1,RORA,PDE4B,PDE4D,TJP2,PDK4,ADCY2,PID1,IDH2,SLC25A13,ENO2,ACACB,AMDHD2,EXTL2,MVK,ACSS2,ACSS1,AFMID,DPYS,ACAT1,ALDH6A1,HSD17B12,AADAT,PDP1,SHMT1,…
3.AD/1.YC	Immature	Down	GO BP	GOBP_MITOCHONDRIAL_MEMBRANE_ORGANIZATION	GOBP_MITOCHONDRIAL_MEMBRANE_ORGANIZATION	1.46936	4.39722e-06	0.000138398	BCL2L1,PINK1,YWHAB,CNP,HSP90AA1,BID,ATP5F1B,ATP5F1A,HIP1R,EYA2,GHITM,MOAP1,PDCD5,TAZ,SLC25A5,ATP5MG,ATP5F1C,NDUFA13,ATP5F1D,ATP5F1E,ATP5MC1,ATP5MC3,ATP5ME,ATP5PF,RCC1L,TIMM13,TIMM8B,TMEM14A,RHOT2,STPG1,MICOS13,MICOS10
3.AD/1.YC	Immature	Down	GO BP	GOBP_HEAD_DEVELOPMENT	GOBP_HEAD_DEVELOPMENT	0.736521	5.15988e-06	0.000161469	SEMA3A,ADCYAP1,LRRK2,CRH,SPATA5,ETS1,FGFR2,FLNA,GLI3,HMGCS1,HSPA5,INHBA,LRP2,NOTCH1,PDGFRA,SERPINE2,CHD7,PTN,PLEKHA1,ROBO2,SLC2A1,BMP7,SOX9,NR2F2,TGFBR2,UBB,WNT3,ARID5B,KDM2B,DYNLL1,ADGRG1,B2M,OLIG2,SATB2,MEIS2,ZFHX3,RARB,SOX2,FOXP2,BAG3,NDE1,ATP6AP2,CSF1R,LPAR1,EGF,ERBB4,ALK,MBP,NEFL,NTRK2,PAK1,SEMA4C,NDRG2,RGS4,GPR37L1,CDC42,PHF8,CNP,SYNE2,SRGAP2,STMN1,EXT1,MYO16,APOD,DLC1,C12ORF57,CTNNA2,PLXNB…
3.AD/1.YC	Immature	Down	GO BP	GOBP_POSITIVE_REGULATION_OF_PROTEIN_METABOLIC_PROCESS	GOBP_POSITIVE_REGULATION_OF_PROTEIN_METABOLIC_PROCESS	0.550791	5.21281e-06	0.000162193	ADCY7,PARK7,ADCYAP1,LRRK2,CRH,DLG1,EDNRB,EGFR,PSME4,GJA1,HSPA2,HSPA5,HSP90AB1,IGF1,INHBA,ITGA2,KIT,LRP2,KITLG,PDGFRB,SEPTIN4,MAP2K6,BMP7,SOD1,SOX9,STK3,TGFB2,TGFBR1,TGFBR2,C3,UBB,VEGFA,VIP,HDAC4,PTPRC,TGFB1,RPL5,RPS27L,MT3,TF,GADD45A,RGCC,ETAA1,RPL26,SOX4,CDC14B,NOX4,WWP2,HIPK2,JARID2,PAWR,PSMD10,REST,RPS27A,SREBF1,TCF7L2,UBA52,UBC,EZR,PARP9,CCND3,IL33,CAMKK2,ERP29,FERMT2,MAP3K8,CSF1R,CTSH,SH3RF2…
3.AD/1.YC	Immature	Down	GO BP	GOBP_POSITIVE_REGULATION_OF_PROTEIN_PHOSPHORYLATION	GOBP_POSITIVE_REGULATION_OF_PROTEIN_PHOSPHORYLATION	0.708949	5.24605e-06	0.0001623	ADCY7,PARK7,ADCYAP1,LRRK2,CRH,DLG1,EDNRB,EGFR,HSPA2,HSP90AB1,IGF1,INHBA,KIT,KITLG,PDGFRB,MAP2K6,BMP7,SOD1,SOX9,STK3,TGFB2,TGFBR1,TGFBR2,C3,UBB,VEGFA,PTPRC,TGFB1,MT3,TF,GADD45A,RGCC,ETAA1,NOX4,HIPK2,PSMD10,RPS27A,UBA52,UBC,PARP9,CCND3,CAMKK2,ERP29,FERMT2,MAP3K8,CSF1R,AGT,DUSP6,LPAR1,EGF,ERBB3,ERBB4,FGD2,FGF1,FGF2,FGFR3,FLT1,SASH1,PIK3R5,ALK,GNG3,ANGPT1,LAMTOR2,MDFIC,HRAS,HTR2A,IL18,LYN,MAP3K3,MIF,…
3.AD/1.YC	Immature	Down	GO BP	GOBP_CELL_CELL_ADHESION	GOBP_CELL_CELL_ADHESION	0.691555	5.5078e-06	0.000169435	CTNNA1,DLG1,EGFR,ETS1,FLNA,NECTIN3,GLI3,IGF1,KIT,NOTCH1,CLDN11,PDGFRA,SERPINE2,ROBO2,BMP7,SOX9,ZFP36L1,TGFB2,TGFBR2,VEGFA,ADAM19,CD9,PTPRC,TGFB1,TTYH1,ASS1,RGCC,SOX4,PAWR,SOX2,EZR,SOX13,SH2B3,DUSP10,MAP3K8,NPNT,GCNT2,IL18,ITPKB,LYN,MBP,PAK1,PPIA,RPS3,SYK,RIPK2,CDC42,RAC1,FUT9,EXT1,PPP1CA,HBB,CDH6,CDH7,CTNNA2,ALCAM,NTNG1,PALLD,PLXNB2,CDH20,LIMS1,MAG,MSN,PIK3R1,PRKCQ,PTPRD,ACTB,CNTN2,SLITRK2,NRXN3,…
3.AD/1.YC	Immature	Down	GO BP	GOBP_PURINE_CONTAINING_COMPOUND_METABOLIC_PROCESS	GOBP_PURINE_CONTAINING_COMPOUND_METABOLIC_PROCESS	0.905859	5.62812e-06	0.000172164	ADCY7,LRRK2,DLG1,HMGCS1,IGF1,HDAC4,TGFB1,ACSBG1,ELOVL6,TECR,ATP6V0C,MTAP,AASS,HTR2A,PDE8A,PINK1,GAPDH,TIGAR,RHOQ,PEMT,PAPSS2,FASN,ATP5F1B,SCD,ATP5F1A,TMSB4X,ACSL3,ADCY5,ADCY8,NME2,ENPP4,ALDOC,PFKL,PGAM1,RORA,PDE4B,PDE4D,TJP2,PDK4,ADCY2,PID1,SLC25A13,ENO2,ACACB,MVK,ACSS2,ACSS1,ACAT1,HSD17B12,AADAT,PDP1,SHMT1,SCD5,SUCLG2,SUCLA2,ATP5MG,ATP5F1C,ATP5F1D,ATP5F1E,ATP5MC1,ATP5MC3,ATP5ME,ATP5PF,PRPS2,AK2,…
3.AD/1.YC	Immature	Down	GO BP	GOBP_PLATELET_DEGRANULATION	GOBP_PLATELET_DEGRANULATION	1.532	5.72186e-06	0.000174053	MAGED2,FLNA,IGF1,SOD1,TGFB2,VEGFA,CD9,TGFB1,TF,EGF,LYN,SYK,TIMP3,TUBA4A,CLU,SPARC,SRGN,TMSB4X,LAMP2,CD63,SYTL4,A2M,SELENOP,VEGFB,ABCC4,ENDOD1,ANXA5,LGALS3BP,PCDH7,TEX264
3.AD/1.YC	Immature	Down	GO BP	GOBP_NEGATIVE_REGULATION_OF_CELLULAR_COMPONENT_ORGANIZATION	GOBP_NEGATIVE_REGULATION_OF_CELLULAR_COMPONENT_ORGANIZATION	0.755569	5.81708e-06	0.000175967	SEMA3A,PARK7,LRRK2,FLNA,HSPA2,HSPA5,IGF1,NOTCH1,PTN,ROBO2,BMP7,SOX9,SPP1,VEGFA,WNT3,CD38,TGFB1,MT3,B2M,BCL2L1,AASS,YAP1,JARID2,BCOR,PPM1A,PSMD10,IRAK3,CRYAB,LPAR1,APOE,MET,SEMA4C,SEMA6A,AIDA,PINK1,ITGB1BP1,CDC42,PHF8,RPL13A,MYLIP,STMN2,EPHA3,SPEF1,STMN1,MDM1,MID1IP1,RAC1,KAT2B,PHLDB2,C11ORF65,EPS8,FAP,MTBP,AURKAIP1,APOD,HSPA8,TIGAR,TSC2,USP30,DLC1,CLU,CTNNA2,SEMA3D,FSTL4,KANK1,LRP4,MAG,OMG,PIK3R1…
3.AD/1.YC	Immature	Down	GO BP	GOBP_MITOCHONDRIAL_ELECTRON_TRANSPORT_CYTOCHROME_C_TO_OXYGEN	GOBP_MITOCHONDRIAL_ELECTRON_TRANSPORT_CYTOCHROME_C_TO_OXYGEN	3.20025	6.16648e-06	0.000184486	COX4I1,COX5B,COX6A1,COX6B1,COX6C,COX7B,COX7C,COX8A,NDUFA4,COX5A
3.AD/1.YC	Immature	Down	GO BP	GOBP_AXON_ENSHEATHMENT_IN_CENTRAL_NERVOUS_SYSTEM	GOBP_AXON_ENSHEATHMENT_IN_CENTRAL_NERVOUS_SYSTEM	3.20025	6.16648e-06	0.000184486	SOX10,NKX6-2,CLU,MAG,KCNJ10,PLP1,ASPA,FA2H,MYRF,MOBP
3.AD/1.YC	Immature	Down	GO BP	GOBP_POSITIVE_REGULATION_OF_HYDROLASE_ACTIVITY	GOBP_POSITIVE_REGULATION_OF_HYDROLASE_ACTIVITY	0.71727	6.58647e-06	0.000195975	ADCYAP1,LRRK2,DNAJC19,EGFR,FGFR2,PSME4,HSPA2,HSP90AB1,ITGA2,KIT,PCNA,PDGFRA,PDGFRB,VEGFA,DYNLL1,PTPRC,RPS27L,ARHGAP1,REST,FERMT2,CTSH,LPAR1,FGF2,FGFR3,FLT1,HRAS,HTR2A,LYN,MBP,NTRK2,RASGRF1,RGS3,RGS4,RPS3,MAPK12,PINK1,SYK,TRAF2,BCAR3,RIPK2,IQGAP1,MTCL1,SRGAP2,FIS1,BID,RACK1,GABARAPL2,TSC2,DLC1,DOCK1,LIMS1,PLXNB1,PREX1,CDKL5,DOCK5,PREX2,CCK,CALM2,RANBP3L,STXBP5,COL4A3,ADRB1,ALDH1A1,GRN,PFN1,P2RY12,…
3.AD/1.YC	Immature	Down	GO BP	GOBP_PROTON_TRANSMEMBRANE_TRANSPORT	GOBP_PROTON_TRANSMEMBRANE_TRANSPORT	1.40413	6.63289e-06	0.000196283	PARK7,SLC9B1,TESC,COX17,ATP6V1D,ATP6V0C,ATP6V0B,ATP6AP1,ATP6V1F,SLC9A3R1,ATP5F1B,ATP1A2,ATP5F1A,TMSB4X,COX7A1,SLC36A1,ATP5MG,COX4I1,COX6A1,COX6B1,COX6C,COX7B,COX7C,COX8A,NDUFS7,NDUFA4,ATP5F1C,ATP5F1D,ATP5F1E,ATP5MC1,ATP5MC3,ATP5ME,ATP5PF,COX5A
3.AD/1.YC	Immature	Down	GO BP	GOBP_NEGATIVE_REGULATION_OF_CELL_POPULATION_PROLIFERATION	GOBP_NEGATIVE_REGULATION_OF_CELL_POPULATION_PROLIFERATION	0.756034	7.41957e-06	0.000217666	ADCYAP1,CTNNA1,DLG1,ETS1,FGFR2,SULF1,GJA1,GLI3,IGFBP7,INHBA,NOTCH1,SERPINE2,TESC,PTN,BMP7,BMPR1B,SOX9,STK3,NR2F2,TGFB2,TGFBR1,TGFBR2,VIP,DDR1,KDM2B,ADGRG1,HDAC4,TGFB1,PEX2,FTH1,B2M,DDAH1,RGCC,SOX4,NOX4,CTCF,NACC2,FRK,JARID2,PAWR,RARB,REST,SOX2,SOX10,STAT1,PER2,IL33,SH2B3,DUSP10,CSF1R,EPHB1,ERBB4,FLT1,GSTP1,HRAS,APOE,LYN,PAK1,MAPK11,NDRG2,TIMP2,TPBG,SCG2,ITGB1BP1,SLC9A3R1,LMNA,KAT2B,CDKN1C,CDKN2D,…
3.AD/1.YC	Immature	Down	GO BP	GOBP_CELL_SURFACE_RECEPTOR_SIGNALING_PATHWAY_INVOLVED_IN_CELL_CELL_SIGNALING	GOBP_CELL_SURFACE_RECEPTOR_SIGNALING_PATHWAY_INVOLVED_IN_CELL_CELL_SIGNALING	0.78844	7.43541e-06	0.000217666	UNC13B,LRRK2,EGFR,FGFR2,PSME4,SULF1,GLI3,NDP,NOTCH1,SOX9,STK3,C3,UBB,WNT3,LGR5,TGFB1,ATP6V0C,SOX4,YAP1,CUX2,MITF,WWOX,PPM1A,PSMD10,RPS27A,SOX2,SOX10,TCF7L2,UBA52,UBC,SOX13,ATP6AP2,FERMT2,EGF,MDFIC,APOE,PSMB6,PSMC3,PSMC5,NDRG2,RGS4,SLC9A3R1,RBX1,CDC42,HECW1,DVL1,SPEF1,RAC1,EXT1,PPP1CA,LATS2,WDR61,RACK1,TSC2,CXXC4,KANK1,MACF1,LRP4,RELN,LIMD1,RIMS2,SULF2,LRRK1,WNT5B,SLC29A1,CACNB3,AMOTL1,PFN1,PLPP3,…
3.AD/1.YC	Immature	Down	GO BP	GOBP_REGULATION_OF_NEUROGENESIS	GOBP_REGULATION_OF_NEUROGENESIS	0.997076	7.98014e-06	0.000232363	SEMA3A,ADCYAP1,CTNNA1,ETV5,GLI3,SOX8,KIT,LRP2,NOTCH1,SERPINE2,PLAG1,CHD7,PTN,ROBO2,BMP7,SPP1,VEGFA,WNT3,TGFB1,MT3,B2M,OLIG2,YAP1,CUX1,CUX2,REST,SOX10,NKX6-2,BHLHE40,PER2,DUSP10,LYN,NEFL,NTRK2,PAK1,SEMA4C,SEMA6A,GPR37L1,SEMA3D,FSTL4,PLXND1,MACF1,PLXNB2,LRP4,MAG,OMG,PLXNB1,RELN,DIP2B,PTPRD,CDKL5,SEMA3B,SEMA6D,SEMA3E,IL6ST,MAN2A1,CX3CR1,IDH2,ASPA,DAAM2
3.AD/1.YC	Immature	Down	GO BP	GOBP_GENERATION_OF_PRECURSOR_METABOLITES_AND_ENERGY	GOBP_GENERATION_OF_PRECURSOR_METABOLITES_AND_ENERGY	0.838985	8.24012e-06	0.000238657	GNPDA1,PARK7,IGF1,VGF,HDAC4,COX17,MT3,NOX4,PRDM16,PER2,HTR2A,PINK1,GAPDH,PPP1CA,BID,GLRX2,TIGAR,CYBB,IL6ST,ATP5F1B,ALDH1A1,ATP5F1A,NDUFA2,ADGRF5,ALDOC,NDUFC2,DERA,PFKL,PGAM1,GHITM,PID1,COX7A1,TAZ,IDH2,SLC25A13,SLC25A18,ENO2,ACSS2,ACSS1,ETFB,GLDC,ACAT1,NDUFAB1,SUCLG2,SUCLA2,ATP5MG,UQCR11,FDX2,NDUFA11,COX4I1,COX5B,COX6A1,COX6B1,COX6C,COX7B,COX7C,COX8A,OPN3,UQCR10,NDUFS7,NDUFA3,NDUFA4,NDUFA5,NDUFB3,…
3.AD/1.YC	Immature	Down	GO BP	GOBP_CYTOSKELETON_ORGANIZATION	GOBP_CYTOSKELETON_ORGANIZATION	0.558502	9.17031e-06	0.000264192	MEF2A,TESK2,TUBGCP5,CTNNA1,DLG1,FLNA,CLIC4,GJA1,KIT,PDGFRA,PDGFRB,TTC12,TRIM36,SOD1,SOX9,TAC1,TGFBR1,CALR,SPIRE2,SLC39A12,TF,TRPM2,GADD45A,RGCC,CDC14B,NOX4,PAWR,EZR,UXT,GPSM2,NDE1,FERMT2,CRYAB,CSF1R,LPAR1,FGD2,HRAS,APOE,MET,NEFL,PAK1,PLCE1,SEMA6A,RGS4,RPS3,IQGAP1,ITGB1BP1,SLC9A3R1,CDC42,C10ORF90,TUBA1B,TUBB3,TUBB4B,CFL1,STMN2,GABARAP,CNP,DCX,DVL1,TUBB,EPHA3,PHLDB1,SYNE2,MTCL1,SRGAP2,SPEF1,GAPDH,T…
3.AD/1.YC	Immature	Down	GO BP	GOBP_NEGATIVE_REGULATION_OF_DEVELOPMENTAL_PROCESS	GOBP_NEGATIVE_REGULATION_OF_DEVELOPMENTAL_PROCESS	0.680813	9.22774e-06	0.000264448	SEMA3A,ADCYAP1,CTNNA1,DCN,EDNRB,EGFR,SULF1,GJA1,GLI3,SOX8,IGF1,INHBA,NOTCH1,PTN,ROBO2,BMP7,SOX9,SPP1,ZFP36L1,STK3,TGFB2,TGFBR1,TGFBR2,THRB,VEGFA,WNT3,CALR,HDAC4,TGFB1,MT3,B2M,GADD45A,RGCC,ID2,HDAC5,OLIG2,YAP1,JARID2,MEIS2,BCOR,RARB,RBL1,REST,SOX2,SOX10,STAT1,NKX6-2,KLF7,FERMT2,DUSP10,SPRED2,EPHB1,FGFR3,IL18,ITPKB,LYN,MAP3K3,MIF,PAK1,SEMA4C,MAPK11,SEMA6A,RGS4,PINK1,ZFP36L2,TLR4,SPRY4,ITGB1BP1,GPR3…
3.AD/1.YC	Immature	Down	GO BP	GOBP_RESPONSE_TO_INORGANIC_SUBSTANCE	GOBP_RESPONSE_TO_INORGANIC_SUBSTANCE	0.826687	1.00123e-05	0.000285429	MEF2A,ADCY7,PARK7,LRRK2,CRHBP,EGFR,ETS1,FOS,CLIC4,HMGCS1,HSPA5,KIT,PCNA,RTF2,PDGFRB,PLEKHA1,BMP7,SOD1,TRPC3,CALR,MT3,B2M,TF,TRPM2,SLC30A4,CPS1,ASS1,TXNIP,PAWR,CRYAB,GPR37,ITPKB,MET,NEFL,PDE8A,MAPK13,RPS3,PINK1,TRAF2,IQGAP1,GPR37L1,PPP1CA,RHOB,RACK1,HBB,PRDX1,GLRX2,SOD2,TIGAR,SYT2,CPNE9,SPARC,CALM2,CYBB,ADGRV1,SYT9,SYT12,CACNA1G,CA2,ADCY8,GSN,NDRG1,PLSCR1,PRNP,SLC12A2,HOMER1,AHCYL1,RYR3,SLC6A1,SLC…
3.AD/1.YC	Immature	Down	GO BP	GOBP_ENDOTHELIAL_CELL_MIGRATION	GOBP_ENDOTHELIAL_CELL_MIGRATION	1.20531	1.11691e-05	0.000316748	DCN,ETS1,NOTCH1,PTN,NR2F2,TGFBR1,VEGFA,CALR,TGFB1,GADD45A,RGCC,HDAC5,SP100,BMPER,AGT,EGF,FGF1,FGF2,SASH1,ANGPT1,APOE,MAP3K3,MET,JCAD,SCG2,ITGB1BP1,RAC1,FAP,RHOB,PLXND1,RHOJ,SPARC,ATP5F1B,GLUL,AMOT,FSTL1,DPP4,GRN,ATP5F1A,ADAMTS9,TMSB4X,PLPP3
3.AD/1.YC	Immature	Down	GO BP	GOBP_NEGATIVE_REGULATION_OF_DEVELOPMENTAL_GROWTH	GOBP_NEGATIVE_REGULATION_OF_DEVELOPMENTAL_GROWTH	1.60338	1.14343e-05	0.00032259	SEMA3A,GJA1,SPP1,STK3,TGFBR2,WNT3,MT3,JARID2,DUSP10,FGFR3,PAK1,SEMA4C,MAPK11,SEMA6A,RGS4,SEMA3D,FSTL4,MAG,DIP2B,SEMA3B,SEMA6D,SEMA3E,MEIS1,ADRB1,NKD1
3.AD/1.YC	Immature	Down	GO BP	GOBP_ERK1_AND_ERK2_CASCADE	GOBP_ERK1_AND_ERK2_CASCADE	1.04164	1.19971e-05	0.000336722	ADCYAP1,DLG1,EGFR,FGFR2,IGF1,NOTCH1,PDGFRA,PDGFRB,SOX9,ZFP36L1,PTPRC,TGFB1,MT3,ATP6AP1,TF,EZR,FERMT2,DUSP10,CSF1R,CTSH,CNKSR3,DDT,BMPER,DUSP6,EGF,SPRED2,EPHB1,ERBB4,MTURN,FGF2,FGFR3,NPNT,GCNT2,ANGPT1,GSTP1,HRAS,HTR2A,HTR2C,APOE,LYN,MIF,PDE8A,NDRG2,SEMA6A,ZFP36L2,SYK,TIMP3,TLR4,TPBG,SPRY4,RIPK2,TNFRSF11A,ITGB1BP1,SLC9A3R1
3.AD/1.YC	Immature	Down	GO BP	GOBP_EXTRINSIC_APOPTOTIC_SIGNALING_PATHWAY	GOBP_EXTRINSIC_APOPTOTIC_SIGNALING_PATHWAY	1.18819	1.25756e-05	0.000350372	PARK7,CTNNA1,IGF1,INHBA,KITLG,BMPR1B,STK3,TGFB2,TGFBR1,PTPRC,TGFB1,BCL2L1,YAP1,WWOX,SP100,TCF7L2,IL33,BAG3,AGT,ERBB3,FGFR3,GSTP1,SH3RF1,TIMP3,TRAF2,SCG2,RFFL,GABARAP,PPP1CA,BID,PIK3R1,IL6R,EYA2,TMBIM1,MLLT11,MOAP1,TNFRSF1A,PDIA3,EYA1,PPP2R1B,ITGA6,ITM2C
3.AD/1.YC	Immature	Down	GO BP	GOBP_POSITIVE_REGULATION_OF_CELLULAR_COMPONENT_ORGANIZATION	GOBP_POSITIVE_REGULATION_OF_CELLULAR_COMPONENT_ORGANIZATION	0.603268	1.26121e-05	0.000350372	UNC13B,PARK7,ADCYAP1,LRRK2,CNR1,COL16A1,DCN,DLG1,CCT5,FLNA,HSPA5,IGF1,ITGA2,KIT,PDGFRB,PTN,ROBO2,BMP7,SOX9,TAC1,TGFB2,TGFBR1,C3,VEGFA,WNT3,SPIRE2,DYNLL1,HDAC4,SEPTIN7,TGFB1,B2M,TF,RGCC,NOX4,CUX1,CUX2,JARID2,SREBF1,GPSM2,CAMKK2,FERMT2,AGT,LPAR1,EGF,EPHB1,ALK,ANGPT1,HRAS,APOE,LYN,MET,NEFL,NTRK2,PAK1,PLCE1,PSMC3,PSMC5,RPS3,PINK1,SYK,TLR4,TPBG,YWHAB,IQGAP1,ITGB1BP1,RBX1,CDC42,STUB1,STMN2,DVL1,EPHA3,P…
3.AD/1.YC	Immature	Down	GO BP	GOBP_POSITIVE_REGULATION_OF_APOPTOTIC_SIGNALING_PATHWAY	GOBP_POSITIVE_REGULATION_OF_APOPTOTIC_SIGNALING_PATHWAY	1.50833	1.40219e-05	0.000387559	PARK7,CTNNA1,INHBA,SEPTIN4,BMPR1B,SOD1,STK3,TGFBR1,UBB,PTPRC,RPL11,BCL2L1,RPL26,NACC2,WWOX,AGT,RPS3,TIMP3,TRAF2,SLC9A3R1,RPS7,FIS1,PPP1CA,BID,RACK1,PDIA3,PPP2R1B,ITM2C
3.AD/1.YC	Immature	Down	GO BP	GOBP_CRISTAE_FORMATION	GOBP_CRISTAE_FORMATION	2.4429	1.46099e-05	0.000401772	PINK1,ATP5F1B,ATP5F1A,TAZ,ATP5MG,ATP5F1C,ATP5F1D,ATP5F1E,ATP5MC1,ATP5MC3,ATP5ME,ATP5PF,MICOS13
3.AD/1.YC	Immature	Down	GO BP	GOBP_NEGATIVE_REGULATION_OF_ION_TRANSPORT	GOBP_NEGATIVE_REGULATION_OF_ION_TRANSPORT	1.03424	1.49063e-05	0.000407045	PARK7,ADCYAP1,LRRK2,CNR1,CRH,CRHBP,SERPINE2,VIP,WWP2,REST,SP100,SREBF1,KLF7,BAG3,ERP29,EGF,ANGPT1,MDFIC,HTR2A,APOE,RGS4,ITGB1BP1,SLC9A3R1,CARTPT,HECW1,BARD1,C11ORF65,FIS1,PRKCB,APOD,CALM2,PKDCC,ATP1A2,CACNB3,P2RY12,VSNL1,JAGN1,SVIP,PFKL,SYTL4,PLA2R1,PID1,CYP51A1,IDH2,ENHO,MIDN,OAZ1,YOD1,SNX3,KCNAB1,CABP1,PXK
3.AD/1.YC	Immature	Down	GO BP	GOBP_REGULATION_OF_SMALL_GTPASE_MEDIATED_SIGNAL_TRANSDUCTION	GOBP_REGULATION_OF_SMALL_GTPASE_MEDIATED_SIGNAL_TRANSDUCTION	0.997115	1.49512e-05	0.000407045	IGF1,KITLG,NOTCH1,PDGFRB,TGFB2,ADGRG1,ARHGAP1,LPAR1,FGD2,HRAS,APOE,ITPKB,LYN,MET,PLCE1,RASGRF1,TIMP2,SPRY4,CDC42,SRGAP2,STMN1,STMN3,RAC1,STAMBP,EPS8,RHOB,TSC2,DLC1,KANK1,RHOQ,RELN,RHOJ,PREX1,RHOU,RHOBTB1,AMOT,LPAR6,VAV2,ERBIN,A2M,CADM4,ARHGAP22,ARHGAP24,GPR17,ABCA1,ARHGAP42,RHOT2,ARHGAP25,ARHGEF1,ARHGAP26,CGNL1,DENND3,FAM13A,ARHGAP31,SRGAP1,ARHGAP29
3.AD/1.YC	Immature	Down	GO BP	GOBP_NEURON_PROJECTION_GUIDANCE	GOBP_NEURON_PROJECTION_GUIDANCE	1.06229	1.51086e-05	0.000409285	SEMA3A,GLI3,NOTCH1,ROBO2,BMP7,BMPR1B,VEGFA,WNT3,RPL24,EZR,KLF7,CSF1R,EPHB1,GFRA1,SHC3,SEMA4C,DOK5,SEMA6A,TUBB3,DVL1,EPHA3,TUBB2B,RAC1,EXT1,ALCAM,SEMA3D,PALLD,PLXND1,PLXNB2,FLRT2,GAB1,GAP43,LAMA1,ANOS1,LAMA2,PIK3R1,PLXNB1,PRKCQ,RELN,DPYSL5,ZSWIM6,NTN4,SCN1B,CNTN2,SEMA3B,SEMA6D,UNC5C,NRXN3,FEZ1,SEMA3E,GAB2
3.AD/1.YC	Immature	Down	GO BP	GOBP_REGULATION_OF_PROTEIN_SERINE_THREONINE_KINASE_ACTIVITY	GOBP_REGULATION_OF_PROTEIN_SERINE_THREONINE_KINASE_ACTIVITY	0.846222	1.53567e-05	0.000413945	CCNI,LRRK2,EGFR,HSP90AB1,IGF1,KIT,KITLG,PDGFRB,MAP2K6,BMP7,SOD1,STK3,NR2F2,UBB,VEGFA,PTPRC,TGFB1,TF,GADD45A,RGCC,ETAA1,PSMD10,RPS27A,UBA52,UBC,CCND3,SH2B3,ERP29,FERMT2,IRAK3,DUSP10,CSF1R,AGT,DUSP6,LPAR1,EGF,SPRED2,FGD2,FGF1,FGF2,FLT1,SASH1,PIK3R5,ALK,GNG3,GSTP1,MDFIC,HRAS,HTR2A,APOE,LYN,MAP3K11,PAK1,PLCE1,PPIA,MAPK11,RGS3,RGS4,RPS3,AIDA,SYK,TLR4,TRAF2,C5,SPRY4,RIPK2,TNFRSF11A,IQGAP1,KAT2B,CDKN1C,…
3.AD/1.YC	Immature	Down	GO BP	GOBP_ATP_SYNTHESIS_COUPLED_PROTON_TRANSPORT	GOBP_ATP_SYNTHESIS_COUPLED_PROTON_TRANSPORT	2.75324	1.57277e-05	0.00042186	ATP6V0C,ATP5F1B,ATP5F1A,ATP5MG,ATP5F1C,ATP5F1D,ATP5F1E,ATP5MC1,ATP5MC3,ATP5ME,ATP5PF
3.AD/1.YC	Immature	Down	GO BP	GOBP_HEART_PROCESS	GOBP_HEART_PROCESS	1.04944	1.64472e-05	0.000438994	MEF2A,SEMA3A,DLG1,EPAS1,FLNA,GJA1,MAP2K6,SOD1,TAC1,TGFB2,THRB,HDAC4,NOX4,YAP1,SREBF1,AGT,RGS4,CDC42,EXT1,CACNG7,SCN1B,CALM2,ATP1A2,CTNNA3,KCNN2,KCNQ1,SCN4B,CACNB3,CACNA1G,ADRB1,CYP2J2,GSN,ITPR1,ITPR2,PDE4B,PDE4D,ATP1B2,VEGFB,AHCYL1,FXYD1,FXYD6,ABCC9,TAZ,CACNA2D2,CHRM2,SGCZ,TMEM65,CACNG4,KCNIP1,RYR3,CACNB4
3.AD/1.YC	Immature	Down	GO BP	GOBP_NEGATIVE_REGULATION_OF_RESPONSE_TO_EXTERNAL_STIMULUS	GOBP_NEGATIVE_REGULATION_OF_RESPONSE_TO_EXTERNAL_STIMULUS	0.950574	1.69258e-05	0.000444033	SEMA3A,ADCYAP1,GJA1,IGF1,NOTCH1,PDGFRA,SERPINE2,HTRA1,ROBO2,SOD1,SPP1,WNT3,CD9,PTPRC,RPS19,NR1D2,SH2B3,IRAK3,DUSP10,DDT,FGF2,GSTP1,NENF,APOE,MIF,SEMA4C,SEMA6A,C5,CARTPT,RNF125,DVL1,PHLDB2,AOAH,FAP,CTNNA2,SEMA3D,SEMA3B,SEMA6D,CCK,SEMA3E,CACNB3,DPP4,GRN,PADI2,ADAMTS18,RORA,UBASH3B,CARD8,A2M,TNFRSF1A,SLC12A2,SERPINB9,PARP14,CALCRL,OTULIN,GRID2,RIN3,GPR17,MVK,NT5E
3.AD/1.YC	Immature	Down	GO BP	GOBP_REGULATION_OF_ENDOTHELIAL_CELL_MIGRATION	GOBP_REGULATION_OF_ENDOTHELIAL_CELL_MIGRATION	1.30709	1.69381e-05	0.000444033	DCN,ETS1,NOTCH1,PTN,NR2F2,VEGFA,CALR,TGFB1,GADD45A,RGCC,HDAC5,SP100,BMPER,AGT,EGF,FGF1,FGF2,SASH1,ANGPT1,APOE,MAP3K3,MET,JCAD,ITGB1BP1,RAC1,RHOB,RHOJ,SPARC,ATP5F1B,GLUL,GRN,ATP5F1A,ADAMTS9,TMSB4X,PLPP3
3.AD/1.YC	Immature	Down	GO BP	GOBP_SENSORY_PERCEPTION_OF_MECHANICAL_STIMULUS	GOBP_SENSORY_PERCEPTION_OF_MECHANICAL_STIMULUS	1.30709	1.69381e-05	0.000444033	HEXB,ITGA2,KIT,LRP2,SERPINE2,CHD7,SOD1,THRB,RPL38,HTR2A,MBP,SLC9A3R1,CDC14A,CDKN2D,SRRM4,WHRN,ADGRV1,KCNQ1,CACNB3,COL4A3,GJB6,SERPINB6,HOMER2,CDH23,OTOGL,ALDH7A1,NDUFB9,EYA1,TMTC4,TIMM13,TIMM8B,KCNK4,PIEZO2,CCDC50,LHFPL3
3.AD/1.YC	Immature	Down	GO BP	GOBP_HOMOTYPIC_CELL_CELL_ADHESION	GOBP_HOMOTYPIC_CELL_CELL_ADHESION	1.68825	1.77812e-05	0.000462875	FLNA,PDGFRA,SERPINE2,CD9,SH2B3,LYN,PPIA,SYK,HBB,PRKCQ,ACTB,CTNNA3,P2RY12,PLPP3,LGALS1,ACTG1,CSRP1,ADAMTS18,MEGF10,UBASH3B,TJP2,PTPRU
3.AD/1.YC	Immature	Down	GO BP	GOBP_MITOCHONDRIAL_ATP_SYNTHESIS_COUPLED_PROTON_TRANSPORT	GOBP_MITOCHONDRIAL_ATP_SYNTHESIS_COUPLED_PROTON_TRANSPORT	2.9368	1.79369e-05	0.000462875	ATP5F1B,ATP5F1A,ATP5MG,ATP5F1C,ATP5F1D,ATP5F1E,ATP5MC1,ATP5MC3,ATP5ME,ATP5PF
3.AD/1.YC	Immature	Down	GO BP	GOBP_CAMP_METABOLIC_PROCESS	GOBP_CAMP_METABOLIC_PROCESS	2.9368	1.79369e-05	0.000462875	ADCY7,PDE8A,ADCY5,ADCY8,PDE4B,PDE4D,ADCY2,PDE10A,PDE7B,PDE7A
3.AD/1.YC	Immature	Down	GO BP	GOBP_NEGATIVE_REGULATION_OF_CELL_DEVELOPMENT	GOBP_NEGATIVE_REGULATION_OF_CELL_DEVELOPMENT	1.2851	1.95407e-05	0.000501883	SEMA3A,ADCYAP1,CTNNA1,EDNRB,IGF1,NOTCH1,PTN,BMP7,SPP1,THRB,VEGFA,WNT3,MT3,B2M,REST,SOX10,NKX6-2,DUSP10,SEMA4C,SEMA6A,SPRY4,ITGB1BP1,GPR37L1,SEMA3D,FSTL4,KANK1,LRP4,MAG,OMG,DIP2B,SEMA3B,SEMA6D,SEMA3E,IDH2,DAAM2
3.AD/1.YC	Immature	Down	GO BP	GOBP_RIBOSE_PHOSPHATE_BIOSYNTHETIC_PROCESS	GOBP_RIBOSE_PHOSPHATE_BIOSYNTHETIC_PROCESS	1.22151	2.0105e-05	0.000513951	ADCY7,TGFB1,ACSBG1,ELOVL6,TECR,ATP6V0C,PINK1,PAPSS2,FASN,ATP5F1B,SCD,ATP5F1A,TMSB4X,ACSL3,ADCY5,ADCY8,NME2,PDK4,ADCY2,PID1,SLC25A13,ACACB,ACSS2,ACSS1,ACAT1,HSD17B12,PDP1,SCD5,ATP5MG,ATP5F1C,ATP5F1D,ATP5F1E,ATP5MC1,ATP5MC3,ATP5ME,ATP5PF,PRPS2,AK2
3.AD/1.YC	Immature	Down	GO BP	GOBP_MORPHOGENESIS_OF_AN_EPITHELIUM	GOBP_MORPHOGENESIS_OF_AN_EPITHELIUM	0.798439	2.07313e-05	0.000527486	SEMA3A,DLG1,FGFR2,FLNA,PSME4,SULF1,CLIC4,GJA1,GLI3,SOX8,TNC,LRP2,NOTCH1,BMP7,SOX9,STK3,TGFB2,TGFBR2,VEGFA,DDR1,KDM2B,LGR5,TGFB1,SOX4,YAP1,PSMD10,SOX10,STAT1,FERMT2,CSF1R,CTSH,AGT,EGF,FGF1,FGF2,NPNT,MET,PAK1,SEMA4C,PSMB6,PSMC3,PSMC5,SLC9A3R1,CDC42,RPS7,DVL1,SPEF1,RAC1,PHLDB2,EXT1,PPP1CA,RHOB,TSC2,COBL,DLC1,PLXND1,PLXNB2,LAMA1,MSN,SHROOM3,NTN4,ACTB,SEMA3E,FMN1,HHIP,TULP3,WNT5B,FREM2,KIF26B,FRAS1,MT…
3.AD/1.YC	Immature	Down	GO BP	GOBP_REGULATION_OF_PEPTIDE_SECRETION	GOBP_REGULATION_OF_PEPTIDE_SECRETION	1.0018	2.15132e-05	0.000542312	UNC13B,CFTR,ADCYAP1,CNR1,CRH,CRHBP,EGFR,GJA1,IGF1,CHD7,SLC2A1,TGFB2,DYNLL1,CD38,TGFB1,SOX4,REST,SREBF1,TCF7L2,EZR,KLF7,PER2,ERP29,HTR2C,APOE,PPIA,TLR4,CARTPT,RAC1,STXBP5,SYT9,DPP4,ADCY5,ADCY8,PHPT1,VSNL1,JAGN1,ITPR1,ITPR2,MYO18A,PFKL,SYTL4,RAPGEF3,SLC12A2,CYP51A1,SLC25A5,IDH2,ENHO,DNAJC1,WLS,MIDN,CACNA2D2,ABCG1
3.AD/1.YC	Immature	Down	GO BP	GOBP_NEGATIVE_REGULATION_OF_CHEMOTAXIS	GOBP_NEGATIVE_REGULATION_OF_CHEMOTAXIS	1.96919	2.17019e-05	0.000544547	SEMA3A,NOTCH1,ROBO2,WNT3,DDT,GSTP1,MIF,SEMA4C,SEMA6A,C5,SEMA3D,SEMA3B,SEMA6D,SEMA3E,DPP4,PADI2,RIN3
3.AD/1.YC	Immature	Down	GO BP	GOBP_MULTICELLULAR_ORGANISMAL_HOMEOSTASIS	GOBP_MULTICELLULAR_ORGANISMAL_HOMEOSTASIS	0.805357	2.22071e-05	0.000554668	CFTR,ADCY7,ADCYAP1,CNR1,EDNRB,EGFR,EPAS1,GJA1,NOTCH1,MAP2K6,SLC2A1,SOD1,SOX9,SPP1,UBB,VEGFA,CD38,ELOVL6,ATP6AP1,B2M,TF,TRPM2,YAP1,PRDM16,PER2,ACVR2B,NR1D2,CSF1R,CTSH,ALK,GCNT2,ANGPT1,HTR2A,IL18,MBP,MET,SYK,TLR4,TNFRSF11A,CARTPT,BARD1,POC1B,STMN1,MDM1,RAC1,EXT1,PRDX1,WHRN,LAMA2,ACTB,PEMT,LRRK1,ADGRV1,TNS2,CA2,ADRB1,ALDH1A1,NAPEPLD,SLC27A1,LAMA4,ADIPOR1,SCD,STAT6,GJB6,ADCY5,ADCY8,ACTG1,ADGRF5,INPP5…
3.AD/1.YC	Immature	Down	GO BP	GOBP_POSITIVE_REGULATION_OF_CELL_ADHESION	GOBP_POSITIVE_REGULATION_OF_CELL_ADHESION	0.860374	2.8557e-05	0.000709979	COL16A1,ETS1,FLNA,GLI3,IGF1,ITGA2,PTN,BMP7,TGFB2,TGFBR2,VEGFA,CALR,ADAM19,ADGRG1,PTPRC,SOX4,ZFHX3,SOX2,SOX13,FERMT2,DUSP10,MAP3K8,NPNT,GCNT2,ANGPT1,RELL2,IL18,ITPKB,LYN,PAK1,RPS3,SYK,RIPK2,IQGAP1,CDC42,RAC1,CSPG5,DOCK1,LIMS1,PIK3R1,CARMIL1,PRKCQ,PREX1,DOCK5,FMN1,IL6ST,KIF26B,DPP4,EPB41L4B,P2RY12,PLPP3,LGALS1,DOCK8,CD55,HLA-DRA,APBB1IP,SELENOK,VSIR,CD276,MEGF10,CD86,TESPA1,UTRN,HSD17B12,PTPRU,ITGA…
3.AD/1.YC	Immature	Down	GO BP	GOBP_SUBSTANTIA_NIGRA_DEVELOPMENT	GOBP_SUBSTANTIA_NIGRA_DEVELOPMENT	2.20228	2.8686e-05	0.000709979	HSPA5,DYNLL1,MBP,NDRG2,CDC42,CNP,ACTB,CALM2,PADI2,PLP1,CKB,COX6B1,ATP5PF,GNB4
3.AD/1.YC	Immature	Down	GO BP	GOBP_ACTOMYOSIN_STRUCTURE_ORGANIZATION	GOBP_ACTOMYOSIN_STRUCTURE_ORGANIZATION	1.21138	2.91227e-05	0.000717526	MEF2A,PDGFRA,PDGFRB,TAC1,TGFBR1,RGCC,NOX4,FERMT2,LPAR1,MET,PAK1,ITGB1BP1,CDC42,STMN1,RAC1,PHLDB2,ANLN,DLC1,PIK3R1,CARMIL1,PFN1,EPB41L4B,ACTG1,CSRP1,MYO18A,LURAP1,RAPGEF3,ELN,PGM5,ZYX,CFL2,LDB3,FRMD6,CNN3,ASAP3,CGNL1,FRMD5
3.AD/1.YC	Immature	Down	GO BP	GOBP_RIBOSOMAL_SMALL_SUBUNIT_ASSEMBLY	GOBP_RIBOSOMAL_SMALL_SUBUNIT_ASSEMBLY	3.04757	3.17454e-05	0.000771237	RPL38,RPSA,RPS27L,MRPS7,RPS10,RPS14,RPS15,RPS19,RPS27
3.AD/1.YC	Immature	Down	GO BP	GOBP_ATP_BIOSYNTHETIC_PROCESS	GOBP_ATP_BIOSYNTHETIC_PROCESS	1.99357	3.1881e-05	0.000771237	TGFB1,ATP6V0C,PINK1,ATP5F1B,ATP5F1A,TMSB4X,PID1,SLC25A13,ATP5MG,ATP5F1C,ATP5F1D,ATP5F1E,ATP5MC1,ATP5MC3,ATP5ME,ATP5PF
3.AD/1.YC	Immature	Down	GO BP	GOBP_VASCULAR_TRANSPORT	GOBP_VASCULAR_TRANSPORT	1.62073	3.19262e-05	0.000771237	GJA1,LRP2,SLC2A1,APOE,SLC9A3R1,SLC29A1,ATP1A2,SLC1A3,SLC22A3,SLC38A1,SLC27A1,ATP1B2,SLC12A2,ABCC9,ABCC4,SLCO2B1,SLC44A1,SLCO1C1,SLC13A3,SLC1A2,SLC6A1,ABCG2
3.AD/1.YC	Immature	Down	GO BP	GOBP_POSITIVE_REGULATION_OF_PHOSPHATIDYLINOSITOL_3_KINASE_SIGNALING	GOBP_POSITIVE_REGULATION_OF_PHOSPHATIDYLINOSITOL_3_KINASE_SIGNALING	1.62073	3.19262e-05	0.000771237	DCN,IGF1,KIT,PDGFRA,PDGFRB,SOX9,TGFB2,AGT,EGF,ERBB3,ERBB4,FGF2,FLT1,PIK3R5,ANGPT1,IL18,LYN,NTRK2,GAB1,PIK3R1,PLXNB1,PRR5L
3.AD/1.YC	Immature	Down	GO BP	GOBP_REGULATION_OF_PROTEIN_STABILITY	GOBP_REGULATION_OF_PROTEIN_STABILITY	1.01155	3.20109e-05	0.000771237	CRTAP,PARK7,LRRK2,CCT5,FLNA,HSP90AB1,IGF1,TESC,STK3,CALR,RPL5,RPL11,PEX2,MT3,TF,SOX4,SREBF1,RPL23,BAG3,CRYAB,CTSH,PINK1,RASSF2,RPS7,STUB1,C10ORF90,MYLIP,DVL1,GAPDH,HSP90AA1,HSPA8,PPIB,TOMM7,TAF9,CLU,PIK3R1,ADGRV1,GRN,PFN1,PLPP3,HIP1R,GSN,DDOST,LAMP2,PRNP,ATP1B2,BAG1,HIP1,USP40,CTNND1,SERF2
3.AD/1.YC	Immature	Down	GO BP	GOBP_NADH_DEHYDROGENASE_COMPLEX_ASSEMBLY	GOBP_NADH_DEHYDROGENASE_COMPLEX_ASSEMBLY	1.81936	3.81666e-05	0.000915493	NDUFA2,NDUFC2,TAZ,NDUFAB1,NDUFA11,NDUFS7,NDUFA3,NDUFA5,NDUFB3,NDUFB4,NDUFB7,NDUFB8,NDUFB9,NDUFS5,NDUFS6,NDUFA13,NDUFB11,NDUFAF8
3.AD/1.YC	Immature	Down	GO BP	GOBP_SMALL_MOLECULE_BIOSYNTHETIC_PROCESS	GOBP_SMALL_MOLECULE_BIOSYNTHETIC_PROCESS	0.696167	3.85125e-05	0.000916229	CFTR,PARK7,GPX4,HMGCS1,SOD1,QKI,ABCD2,ACSBG1,HACD4,ELOVL6,TECR,CPS1,ASS1,MTAP,MTRR,AASS,REST,SREBF1,PER2,FGF1,FGF2,GSTP1,APOE,ITPKB,MIF,PDE8A,SYK,CNP,GAPDH,MID1IP1,KAT2B,ARPP19,FASN,GLUL,MOXD1,KMO,ADIPOR1,SCD,MGLL,ACSL3,PLA2G4A,PLP1,PTGDS,TBXAS1,FADS2,NME2,ALDOC,DERA,PGAM1,PDXK,PDE4B,PDE4D,PDK4,SERINC5,OSBPL1A,CYP51A1,ABCG1,SLC25A13,ENO2,ACACB,NLN,CYP27A1,FDPS,MVK,ACER3,ACSS2,ARV1,TM7SF2,PCBD2,AC…
3.AD/1.YC	Immature	Down	GO BP	GOBP_RESPONSE_TO_METAL_ION	GOBP_RESPONSE_TO_METAL_ION	0.915293	3.8664e-05	0.000916229	MEF2A,ADCY7,PARK7,LRRK2,CRHBP,EGFR,FOS,CLIC4,HSPA5,KIT,PCNA,SOD1,TRPC3,CALR,MT3,B2M,TF,TRPM2,SLC30A4,CPS1,ASS1,TXNIP,ITPKB,IQGAP1,PPP1CA,SOD2,TIGAR,SYT2,CPNE9,SPARC,CALM2,CYBB,ADGRV1,SYT9,SYT12,CACNA1G,CA2,ADCY8,GSN,NDRG1,PLSCR1,PRNP,SLC12A2,HOMER1,AHCYL1,RYR3,SLC25A13,NPC1,ATP5F1D,EIF2S1,SLC41A1,MT1E,MT1M,MT1X,MT2A,CYBRD1,CDH1,CPNE2,CUTA
3.AD/1.YC	Immature	Down	GO BP	GOBP_REGULATION_OF_CHOLESTEROL_BIOSYNTHETIC_PROCESS	GOBP_REGULATION_OF_CHOLESTEROL_BIOSYNTHETIC_PROCESS	2.15159	3.87021e-05	0.000916229	HMGCS1,SOD1,ELOVL6,SREBF1,FGF1,APOE,FASN,SCD,CYP51A1,ABCG1,ACACB,FDPS,MVK,TM7SF2
3.AD/1.YC	Immature	Down	GO BP	GOBP_RIBOSOMAL_LARGE_SUBUNIT_BIOGENESIS	GOBP_RIBOSOMAL_LARGE_SUBUNIT_BIOGENESIS	1.75194	3.95628e-05	0.000932552	RPL3,RPL5,RPL6,RPL10,RPL11,RPL23A,RPL24,RPL38,RPL26,NHP2,ZNF622,RPL35,RPL10A,RPL7,RPL7A,RPL35A,RPL14,RPL7L1,GTF3A
3.AD/1.YC	Immature	Down	GO BP	GOBP_MITOCHONDRIAL_TRANSPORT	GOBP_MITOCHONDRIAL_TRANSPORT	1.02464	4.25898e-05	0.000995285	LRRK2,DNAJC19,BCL2L1,SREBF1,BAG3,PINK1,YWHAB,ARIH2,CNP,MID1IP1,C11ORF65,FIS1,HSP90AA1,BID,UBL5,TOMM7,RHOU,TOMM20,ATP5F1B,ATP5F1A,HIP1R,EYA2,MOAP1,PDCD5,TMEM14C,SLC25A5,SLC25A13,SLC25A18,ACACB,SLC25A32,ATP5MG,ATP5F1C,NDUFA13,ATP5F1D,ATP5F1E,ATP5MC1,ATP5MC3,ATP5ME,ATP5PF,TIMM17A,TIMM13,TIMM8B,MCUB,MCUR1,TMEM14A,RHOT2,STPG1,SFXN5
3.AD/1.YC	Immature	Down	GO BP	GOBP_GROWTH	GOBP_GROWTH	0.621758	4.45346e-05	0.00103628	SEMA3A,EGFR,FGFR2,CLIC4,GJA1,GLI3,HSP90AB1,TNC,GPR149,IGF1,IGFBP7,INHBA,NOTCH1,PDGFRB,SERPINE2,PLAG1,CHD7,PTN,PLEKHA1,BMPR1B,SOD1,SOX9,SPP1,ZFP36L1,STK3,TGFB2,TGFBR1,TGFBR2,VEGFA,WNT3,DDR1,ARID5B,KDM2B,ADAM15,CD9,CD38,TGFB1,MT3,YAP1,JARID2,PSMD10,RARB,SOX2,SOX10,EZR,DUSP10,CRYAB,AGT,DUSP6,ERBB4,FGF1,FGF2,FGFR3,LAMTOR2,APOE,PAK1,PLCE1,SEMA4C,MAPK11,SEMA6A,RGS4,IQGAP1,CDC42,ARIH2,DVL1,SBDS,EXT1,CDK…
3.AD/1.YC	Immature	Down	GO BP	GOBP_ACTIVATION_OF_PROTEIN_KINASE_ACTIVITY	GOBP_ACTIVATION_OF_PROTEIN_KINASE_ACTIVITY	0.947351	4.47916e-05	0.00103783	ADCY7,PARK7,LRRK2,DLG1,EGFR,IGF1,KIT,MAP2K6,SOD1,STK3,TGFB2,TGFBR1,TGFBR2,UBB,VEGFA,PTPRC,MT3,TF,GADD45A,RGCC,RPS27A,UBA52,UBC,ERP29,MAP3K8,AGT,DUSP6,LPAR1,EGF,FGF1,FGF2,ALK,GNG3,ANGPT1,LAMTOR2,MDFIC,IL18,MAP3K3,MAP3K11,PAK1,PLCE1,PPIA,MAPK11,PINK1,SYK,TLR4,TRAF2,C5,RIPK2,ITGB1BP1,CARTPT,IL6R,ADCY5,ADCY8,CD86,ADCY2
3.AD/1.YC	Immature	Down	GO BP	GOBP_VASCULAR_PROCESS_IN_CIRCULATORY_SYSTEM	GOBP_VASCULAR_PROCESS_IN_CIRCULATORY_SYSTEM	1.05779	4.57114e-05	0.00105466	EDNRB,EGFR,GJA1,LRP2,SLC2A1,SOD1,VEGFA,CD38,TGFB1,CPS1,DDAH1,PER2,FERMT2,AGT,ANGPT1,HTR2A,APOE,ITGB1BP1,SLC9A3R1,EXT1,SOD2,DOCK5,SLC29A1,ATP1A2,SLC1A3,SLC22A3,SLC38A1,ADRB1,SLC27A1,HRH2,TJP2,ATP1B2,SLC12A2,ABCC9,ABCC4,CHRM3,ARHGAP42,SLCO2B1,SLC44A1,SLCO1C1,SLC13A3,SLC1A2,SLC6A1,ABCG2
3.AD/1.YC	Immature	Down	GO BP	GOBP_NEGATIVE_REGULATION_OF_NERVOUS_SYSTEM_DEVELOPMENT	GOBP_NEGATIVE_REGULATION_OF_NERVOUS_SYSTEM_DEVELOPMENT	1.36597	4.73085e-05	0.00108149	SEMA3A,ADCYAP1,CTNNA1,NOTCH1,PTN,ROBO2,BMP7,SPP1,WNT3,MT3,B2M,REST,SOX10,NKX6-2,DUSP10,SEMA4C,SEMA6A,GPR37L1,SEMA3D,FSTL4,LRP4,MAG,OMG,DIP2B,SEMA3B,SEMA6D,SEMA3E,IDH2,DAAM2
3.AD/1.YC	Immature	Down	GO BP	GOBP_PEPTIDE_SECRETION	GOBP_PEPTIDE_SECRETION	0.865326	4.74702e-05	0.00108149	UNC13B,CFTR,PARK7,ADCYAP1,CNR1,CRH,CRHBP,EGFR,GJA1,IGF1,CHD7,SLC2A1,TGFB2,VGF,VIP,DYNLL1,CD38,TGFB1,SOX4,REST,SREBF1,TCF7L2,EZR,KLF7,PER2,ERP29,HTR2C,APOE,PPIA,TLR4,SCG2,CARTPT,RAC1,RIMS2,CPLX1,STXBP5,SYT9,SNCG,DPP4,ADCY5,ADCY8,PHPT1,VSNL1,JAGN1,ITPR1,ITPR2,MYO18A,PFKL,SYTL4,RAPGEF3,SLC12A2,CBLN4,CYP51A1,ABCA1,SLC25A5,IDH2,ENHO,M6PR,DNAJC1,WLS,MIDN,CACNA2D2,OLFM2,ABCG1
3.AD/1.YC	Immature	Down	GO BP	GOBP_REGULATION_OF_CELLULAR_PROTEIN_LOCALIZATION	GOBP_REGULATION_OF_CELLULAR_PROTEIN_LOCALIZATION	0.762189	4.8275e-05	0.00109524	PARK7,LRRK2,CTNNA1,DLG1,EGFR,CCT5,FLNA,GLI3,HSP90AB1,PTN,TGFB1,BCL2L1,YAP1,PPM1A,SP100,SREBF1,TCF7L2,EZR,PARP9,BAG3,GPSM2,FERMT2,EGF,ERBB4,ANGPT1,MDFIC,HRAS,PAK1,PINK1,YWHAB,IQGAP1,ITGB1BP1,CDC42,ARIH2,BARD1,DVL1,EPHA3,MTCL1,GNAI1,C11ORF65,FIS1,LATS2,HSP90AA1,BID,RACK1,APOD,UBL5,TOMM7,RHOQ,LRP4,MSN,PIK3R1,RHOU,ACTB,PKDCC,GLUL,VAMP2,CACNB3,PRR5L,ACSL3,GPC6,AP2M1,ASTN2,GSN,SVIP,PRNP,TMBIM1,PDCD5,RA…
3.AD/1.YC	Immature	Down	GO BP	GOBP_PROTEIN_STABILIZATION	GOBP_PROTEIN_STABILIZATION	1.18076	4.9577e-05	0.00112011	CRTAP,PARK7,CCT5,FLNA,HSP90AB1,IGF1,TESC,STK3,CALR,RPL5,RPL11,MT3,SOX4,RPL23,BAG3,CRYAB,PINK1,RASSF2,RPS7,C10ORF90,DVL1,GAPDH,HSP90AA1,PPIB,TAF9,CLU,PIK3R1,GRN,PFN1,PLPP3,HIP1R,LAMP2,ATP1B2,BAG1,HIP1,CTNND1
3.AD/1.YC	Immature	Down	GO BP	GOBP_RESPONSE_TO_ORGANIC_CYCLIC_COMPOUND	GOBP_RESPONSE_TO_ORGANIC_CYCLIC_COMPOUND	0.61039	5.07115e-05	0.00114101	CFTR,PARK7,ADCYAP1,LRRK2,CNR1,CRH,CRHBP,CTNNA1,EDNRB,EGFR,ETS1,FLNA,FOS,GJA1,HMGCS1,HSPA5,HSP90AB1,TNC,IGFBP7,INHBA,ITGA2,NOTCH1,PCNA,PDGFRB,PTN,CATSPERG,BMP7,SOD1,SPP1,ZFP36L1,TAC1,NR2F2,TGFB2,TGFBR1,TGFBR2,TRPC3,VGF,CALR,PAQR8,CD38,TGFB1,ACSBG1,TRPM2,CPS1,ASS1,MTAP,NOX4,HDAC5,YAP1,TXNIP,REST,SOX10,SREBF1,STAT1,EZR,FOXP2,IRAK3,CRYAB,DUSP6,ALK,GSTP1,HTR2A,HTR2C,IL18,LYN,NEFL,PAK1,RGS4,ZFP36L2,RIP…
3.AD/1.YC	Immature	Down	GO BP	GOBP_REGULATION_OF_PROTEIN_MODIFICATION_PROCESS	GOBP_REGULATION_OF_PROTEIN_MODIFICATION_PROCESS	0.481716	5.24235e-05	0.00117467	CRTAP,CCNI,ADCY7,PARK7,ADCYAP1,LRRK2,CRH,DLG1,EDNRB,EGFR,EPAS1,HSPA2,HSPA5,HSP90AB1,IGF1,INHBA,KIT,KITLG,PDGFRB,SEPTIN4,TESC,MAP2K6,PTN,BMP7,SOD1,SOX9,STK3,NR2F2,TGFB2,TGFBR1,TGFBR2,C3,UBB,VEGFA,HDAC4,PTPRC,TGFB1,RPL5,RPL11,MT3,TF,GADD45A,RGCC,ETAA1,SOX4,CDC14B,NOX4,AASS,CTCF,HIPK2,JARID2,BCOR,PSMD10,RPS27A,SREBF1,UBA52,UBC,PARP9,PER2,CCND3,RPL23,SH2B3,CAMKK2,ERP29,FERMT2,IRAK3,DUSP10,MAP3K8,CSF1…
3.AD/1.YC	Immature	Down	GO BP	GOBP_NEGATIVE_REGULATION_OF_INTRACELLULAR_TRANSPORT	GOBP_NEGATIVE_REGULATION_OF_INTRACELLULAR_TRANSPORT	1.91753	5.28291e-05	0.00117891	PARK7,LRRK2,ARHGAP1,SP100,BAG3,CRYAB,ANGPT1,MDFIC,ITGB1BP1,BARD1,C11ORF65,APOD,SVIP,YOD1,SNX3,CABP1
3.AD/1.YC	Immature	Down	GO BP	GOBP_CHAPERONE_MEDIATED_AUTOPHAGY	GOBP_CHAPERONE_MEDIATED_AUTOPHAGY	3.19866	5.4651e-05	0.00120965	BAG3,STUB1,HSP90AA1,HSPA8,CLU,LAMP2,SYNPO2,GFAP
3.AD/1.YC	Immature	Down	GO BP	GOBP_NEGATIVE_REGULATION_OF_RESPONSE_TO_REACTIVE_OXYGEN_SPECIES	GOBP_NEGATIVE_REGULATION_OF_RESPONSE_TO_REACTIVE_OXYGEN_SPECIES	3.19866	5.4651e-05	0.00120965	PARK7,LRRK2,GPR37,MET,PDE8A,PINK1,GPR37L1,RACK1
3.AD/1.YC	Immature	Down	GO BP	GOBP_REGULATION_OF_PLATELET_ACTIVATION	GOBP_REGULATION_OF_PLATELET_ACTIVATION	2.32655	5.6179e-05	0.00123844	PDGFRA,SERPINE2,CD9,SH2B3,APOE,LYN,SYK,TLR4,PRKCQ,PLA2G4A,ADAMTS18,UBASH3B
3.AD/1.YC	Immature	Down	GO BP	GOBP_RIBOSOME_ASSEMBLY	GOBP_RIBOSOME_ASSEMBLY	1.83145	5.69685e-05	0.00125078	RPL3,RPL5,RPL6,RPL10,RPL11,RPL23A,RPL24,RPL38,RPSA,RPS27L,MRPS7,RPS10,RPS14,RPS15,RPS19,RPS27,SBDS
3.AD/1.YC	Immature	Down	GO BP	GOBP_REGULATION_OF_PROTEIN_PHOSPHORYLATION	GOBP_REGULATION_OF_PROTEIN_PHOSPHORYLATION	0.541455	5.73782e-05	0.00125472	CCNI,ADCY7,PARK7,ADCYAP1,LRRK2,CRH,DLG1,EDNRB,EGFR,HSPA2,HSP90AB1,IGF1,INHBA,KIT,KITLG,PDGFRB,TESC,MAP2K6,BMP7,SOD1,SOX9,STK3,NR2F2,TGFB2,TGFBR1,TGFBR2,C3,UBB,VEGFA,PTPRC,TGFB1,MT3,TF,GADD45A,RGCC,ETAA1,NOX4,HIPK2,PSMD10,RPS27A,UBA52,UBC,PARP9,CCND3,SH2B3,CAMKK2,ERP29,FERMT2,IRAK3,DUSP10,MAP3K8,CSF1R,CNKSR3,BMPER,AGT,DUSP6,LPAR1,EGF,SPRED2,ERBB3,ERBB4,FGD2,FGF1,FGF2,FGFR3,FLT1,SASH1,PIK3R5,ALK,GN…
3.AD/1.YC	Immature	Down	GO BP	GOBP_ACIDIC_AMINO_ACID_TRANSPORT	GOBP_ACIDIC_AMINO_ACID_TRANSPORT	1.75906	5.9273e-05	0.00128582	UNC13B,GJA1,PER2,NTRK2,SLC9A3R1,CCK,KCNJ10,ATP1A2,SLC1A3,CPLX1,VAMP2,KMO,SLC12A2,SLC1A2,SLC6A1,SLC25A13,SLC17A6,SLC25A18
3.AD/1.YC	Immature	Down	GO BP	GOBP_REGULATION_OF_LIPID_METABOLIC_PROCESS	GOBP_REGULATION_OF_LIPID_METABOLIC_PROCESS	0.859846	6.13359e-05	0.00132529	CNR1,DNAJC19,HMGCS1,IGFBP7,KIT,PDGFRA,PDGFRB,SOD1,SOX9,C3,TGFB1,ABCD2,ELOVL6,ID2,REST,SREBF1,NR1D2,AGT,FGF1,FGF2,FGFR3,FLT1,ALK,HTR2A,HTR2C,APOE,LYN,CDC42,STUB1,MID1IP1,RACK1,APOD,PIP4K2A,FASN,SLC27A1,ADIPOR1,SCD,P2RY12,ACSL3,GLIPR1,ADGRF5,RORA,VAV2,TNFRSF1A,PDK4,PPP2R5A,CYP51A1,ABCA1,ENHO,ABCG1,EDF1,ACACB,FDPS,LDLRAP1,MVK,ARV1,TM7SF2,STARD4,PLIN5,PDP1,PIK3IP1,PIP4K2C,OPA3
3.AD/1.YC	Immature	Down	GO BP	GOBP_PROTEIN_PHOSPHORYLATION	GOBP_PROTEIN_PHOSPHORYLATION	0.4782	6.17847e-05	0.00132851	TESK2,MERTK,CCNI,ADCY7,PARK7,ADCYAP1,LRRK2,CRH,DLG1,EDNRB,EGFR,FGFR2,HSPA2,HSP90AB1,IGF1,INHBA,KIT,KITLG,PDGFRA,PDGFRB,TESC,MAP2K6,BMP7,BMPR1B,SOD1,SOX9,STK3,NR2F2,TGFB2,TGFBR1,TGFBR2,C3,UBB,VEGFA,DDR1,PTPRC,TGFB1,MT3,TF,GADD45A,RGCC,ETAA1,STK33,CDK18,NOX4,FRK,HIPK2,PSMD10,RPS27A,UBA52,UBC,PARP9,CCND3,ACVR2B,SH2B3,CAMKK2,ERP29,FERMT2,IRAK3,DUSP10,MAP3K8,CSF1R,CNKSR3,BMPER,AGT,DUSP6,LPAR1,EGF,SPRE…
3.AD/1.YC	Immature	Down	GO BP	GOBP_SMALL_GTPASE_MEDIATED_SIGNAL_TRANSDUCTION	GOBP_SMALL_GTPASE_MEDIATED_SIGNAL_TRANSDUCTION	0.77738	6.19727e-05	0.00132851	PARK7,IGF1,KITLG,NOTCH1,PDGFRB,TGFB2,ADGRG1,ARHGAP1,GPSM2,LPAR1,FGD2,FGF2,HRAS,APOE,ITPKB,LYN,MET,PLCE1,SHC3,MAPK11,RASGRF1,TIMP2,SPRY4,BCAR3,CDC42,CFL1,SRGAP2,STMN1,STMN3,RAC1,STAMBP,EPS8,RHOB,TSC2,DLC1,DOCK1,KANK1,RHOQ,RND3,RELN,RHOJ,PREX1,RHOU,DOCK5,RHOBTB1,AMOT,LPAR6,DOCK2,DOCK8,VAV2,ERBIN,A2M,RAPGEF3,CADM4,ARHGAP22,ARHGAP24,ELMO1,GPR17,ABCA1,ARHGAP42,RHOT2,CHML,ARFIP2,RIPOR1,ARHGAP25,ARHGEF1…
3.AD/1.YC	Immature	Down	GO BP	GOBP_NEGATIVE_REGULATION_OF_TRANSPORT	GOBP_NEGATIVE_REGULATION_OF_TRANSPORT	0.839816	6.29746e-05	0.00134469	PARK7,ADCYAP1,LRRK2,CNR1,CRH,CRHBP,GJA1,INHBA,NOTCH1,SERPINE2,VIP,ARHGAP1,WWP2,REST,SP100,SREBF1,KLF7,BAG3,ERP29,CRYAB,EGF,ERBB3,ANGPT1,MDFIC,HTR2A,APOE,RGS4,ITGB1BP1,SLC9A3R1,CARTPT,HECW1,BARD1,EPHA3,RAC1,C11ORF65,FIS1,PRKCB,RACK1,APOD,CALM2,PKDCC,ATP1A2,CACNB3,P2RY12,VSNL1,JAGN1,SVIP,PFKL,PLSCR1,DYSF,SYTL4,PLA2R1,TNFRSF1A,PID1,RIN3,CYP51A1,IDH2,ENHO,MIDN,OAZ1,YOD1,SNX3,KCNAB1,CABP1,PXK
3.AD/1.YC	Immature	Down	GO BP	GOBP_REGULATION_OF_MEMBRANE_POTENTIAL	GOBP_REGULATION_OF_MEMBRANE_POTENTIAL	0.831045	6.47618e-05	0.00137745	UNC13B,CFTR,PARK7,ADCYAP1,LRRK2,CNR1,DCN,DLG1,FLNA,GJA1,PTN,SOD1,TAC1,UBB,BCL2L1,WWP2,CUX2,NTRK2,RGS4,PINK1,DVL1,KCNH5,BID,RACK1,SOD2,RELN,SCN1B,CCK,RIMS2,GNA11,SLC29A1,KCNJ10,ATP1A2,RIMS3,CTNNA3,KCNA2,KCNN2,KCNQ1,HCN2,SCN4B,SCN9A,CACNB3,CACNA1G,ADRB1,TUSC2,MLLT11,ATP1B2,PID1,GRID2,GRIN2D,FXYD1,CACNG4,CACNB4,PPA2,TAFA4,KCNH8,KCNK4,KCNK9,KCNK13,KCNK12,PIEZO2,KCNH7,GABRG1,GABRG3,PXK,GRIK3,HTR3B,GRI…
3.AD/1.YC	Immature	Down	GO BP	GOBP_MUSCLE_CELL_PROLIFERATION	GOBP_MUSCLE_CELL_PROLIFERATION	1.17941	6.58382e-05	0.0013949	EGFR,FGFR2,GJA1,IGF1,ITGA2,NOTCH1,PDGFRB,TGFB2,TGFBR1,TGFBR2,VIP,HDAC4,ID2,YAP1,JARID2,STAT1,TCF7L2,EPHB1,ERBB4,FGF2,ANGPT1,GSTP1,IL18,PAK1,MAPK11,NDRG2,APOD,SOD2,MEIS1,IL6R,MEGF10,CALCRL,ABCC4,ELN,LDLRAP1
3.AD/1.YC	Immature	Down	GO BP	GOBP_RESPONSE_TO_GROWTH_FACTOR	GOBP_RESPONSE_TO_GROWTH_FACTOR	0.672776	6.65348e-05	0.00140419	DCN,EGFR,FGFR2,SULF1,FOS,HSPA5,HSP90AB1,TNC,LRP2,NOTCH1,PDGFRA,PDGFRB,HTRA1,PTN,BMP7,BMPR1B,SOX9,ZFP36L1,TAC1,TGFB2,TGFBR1,TGFBR2,UBB,VEGFA,TGFB1,MT3,CPS1,NOX4,EID2,HIPK2,HIVEP1,MEIS2,ZFHX3,WWOX,PPM1A,RPS27A,PRDM16,SOX2,UBA52,UBC,ACVR2B,FERMT2,BMPER,AGT,DUSP6,SPRED2,ERBB4,FGF1,FGF2,FGFR3,FLT1,GCNT2,GSTP1,NTRK2,PDE8A,DOK5,SEMA6A,JCAD,ZFP36L2,SPRY4,IQGAP1,ITGB1BP1,RPL8,STUB1,STMN2,EXT1,CDKN1C,LATS2…
3.AD/1.YC	Immature	Down	GO BP	GOBP_POSITIVE_REGULATION_OF_ESTABLISHMENT_OF_PROTEIN_LOCALIZATION	GOBP_POSITIVE_REGULATION_OF_ESTABLISHMENT_OF_PROTEIN_LOCALIZATION	0.920464	6.68683e-05	0.00140578	UNC13B,CFTR,CRH,EGFR,CCT5,FLNA,GJA1,GLI3,HSP90AB1,IGF1,TGFB2,DYNLL1,CD38,TGFB1,SOX4,PPM1A,TCF7L2,EZR,BAG3,HRAS,PAK1,PPIA,PINK1,TLR4,YWHAB,ITGB1BP1,CDC42,ARIH2,MTCL1,RAC1,FIS1,BID,RACK1,UBL5,TOMM7,PIK3R1,RHOU,VAMP2,CACNB3,PRR5L,ACSL3,ADCY8,PHPT1,VSNL1,MYO18A,PRNP,SYTL4,PDCD5,RAPGEF3,WLS,ABCG1,OAZ1,ZIC1,RIPOR1,CDH1
3.AD/1.YC	Immature	Down	GO BP	GOBP_REGULATION_OF_CHOLESTEROL_METABOLIC_PROCESS	GOBP_REGULATION_OF_CHOLESTEROL_METABOLIC_PROCESS	1.88095	6.72587e-05	0.00140855	HMGCS1,SOD1,ELOVL6,SREBF1,FGF1,APOE,FASN,SCD,CYP51A1,ABCG1,ACACB,FDPS,LDLRAP1,MVK,ARV1,TM7SF2
3.AD/1.YC	Immature	Down	GO BP	GOBP_NEPHRON_DEVELOPMENT	GOBP_NEPHRON_DEVELOPMENT	1.31114	6.75875e-05	0.00141002	DLG1,SULF1,GLI3,SOX8,NOTCH1,PDGFRA,PDGFRB,BMP7,SOX9,VEGFA,YAP1,STAT1,AGT,FGF1,FGF2,NPNT,ANGPT1,PLCE1,IQGAP1,EXT1,FMN1,SULF2,IL6R,MYO1E,COL4A3,COL4A4,DCHS2,KIF26B,MTSS1
3.AD/1.YC	Immature	Down	GO BP	GOBP_REGULATION_OF_EXTRACELLULAR_MATRIX_ORGANIZATION	GOBP_REGULATION_OF_EXTRACELLULAR_MATRIX_ORGANIZATION	2.05526	6.82302e-05	0.00141799	ETS1,NOTCH1,SOX9,DDR1,TGFB1,RGCC,AGT,PHLDB1,PHLDB2,FAP,DDR2,DPP4,CST3,TNFRSF1A
3.AD/1.YC	Immature	Down	GO BP	GOBP_CANONICAL_WNT_SIGNALING_PATHWAY	GOBP_CANONICAL_WNT_SIGNALING_PATHWAY	0.915038	6.97236e-05	0.00144352	LRRK2,EGFR,FGFR2,PSME4,GLI3,NOTCH1,SOX9,STK3,WNT3,LGR5,TGFB1,SOX4,YAP1,MITF,PPM1A,PSMD10,SOX2,SOX10,TCF7L2,SOX13,ATP6AP2,EGF,APOE,PSMB6,PSMC3,PSMC5,SLC9A3R1,RBX1,HECW1,DVL1,EXT1,PPP1CA,LATS2,KANK1,LRP4,LIMD1,SULF2,LRRK1,WNT5B,PLPP3,FZD6,ZNRF3,NKD1,TMEM131L,OTULIN,RBMS3,WLS,GPC5,PFDN5,PTPRU,DAAM2,CTNND1,EDA,RNF220,JRK
3.AD/1.YC	Immature	Down	GO BP	GOBP_REGULATION_OF_BLOOD_CIRCULATION	GOBP_REGULATION_OF_BLOOD_CIRCULATION	0.970855	7.07067e-05	0.00145833	MEF2A,SEMA3A,DLG1,EGFR,EPAS1,FLNA,GJA1,TAC1,TGFB2,THRB,CD38,HDAC4,SREBF1,PER2,AGT,HTR2A,RGS4,CACNG7,SCN1B,DOCK5,CALM2,ATP1A2,CTNNA3,KCNN2,KCNQ1,SCN4B,CACNB3,CACNA1G,ADRB1,CYP2J2,HRH2,ITPR1,ITPR2,PDE4B,PDE4D,ATP1B2,AHCYL1,FXYD1,FXYD6,ABCC9,CACNA2D2,CHRM2,CHRM3,ARHGAP42,TMEM65,CACNG4,KCNIP1,RYR3,CACNB4
3.AD/1.YC	Immature	Down	GO BP	GOBP_GLAND_MORPHOGENESIS	GOBP_GLAND_MORPHOGENESIS	1.42417	7.27058e-05	0.00148828	SEMA3A,FGFR2,SULF1,GLI3,TNC,NOTCH1,PLAG1,PTN,BMP7,SOX9,TGFB2,TGFBR2,DDR1,TGFB1,CSF1R,FGF1,SLC9A3R1,CDC42,PLXND1,LAMA1,MSN,NTN4,SULF2,RPS6KA1,EDA
3.AD/1.YC	Immature	Down	GO BP	GOBP_NEGATIVE_REGULATION_OF_CELLULAR_PROTEIN_LOCALIZATION	GOBP_NEGATIVE_REGULATION_OF_CELLULAR_PROTEIN_LOCALIZATION	1.42417	7.27058e-05	0.00148828	PARK7,LRRK2,CTNNA1,TGFB1,BCL2L1,SP100,BAG3,ANGPT1,MDFIC,ITGB1BP1,BARD1,C11ORF65,LATS2,APOD,RHOQ,PKDCC,AP2M1,ASTN2,SVIP,TMBIM1,PID1,PPP2R5A,ABHD17B,YOD1,CABP1
3.AD/1.YC	Immature	Down	GO BP	GOBP_REGULATION_OF_CELL_SHAPE	GOBP_REGULATION_OF_CELL_SHAPE	1.28052	7.31328e-05	0.00148861	DLG1,HEXB,KIT,PTN,VEGFA,SEPTIN7,EZR,FERMT2,CSF1R,LPAR1,FGD2,SLC9A3R1,RAC1,EPS8,RHOB,DLC1,FMNL2,PLXND1,RHOQ,PLXNB2,RND3,MSN,MYO10,PLXNB1,RHOJ,ERMN,SHROOM3,RHOU,LIMD1,SEMA3E,RHOBTB1
3.AD/1.YC	Immature	Down	GO BP	GOBP_REGULATION_OF_LIPID_KINASE_ACTIVITY	GOBP_REGULATION_OF_LIPID_KINASE_ACTIVITY	1.72982	7.32687e-05	0.00148861	KIT,PDGFRA,PDGFRB,TGFB1,RBL1,FGF2,FGFR3,FLT1,PIK3R5,LYN,CDC42,PIK3R1,PIP4K2A,P2RY12,VAV2,PPP2R5A,PIK3IP1,PIP4K2C
3.AD/1.YC	Immature	Down	GO BP	GOBP_SEMAPHORIN_PLEXIN_SIGNALING_PATHWAY	GOBP_SEMAPHORIN_PLEXIN_SIGNALING_PATHWAY	2.14707	7.4425e-05	0.0015009	SEMA3A,FLNA,MET,SEMA4C,SEMA6A,RAC1,SEMA3D,PLXND1,PLXNB2,PLXNB1,SEMA3B,SEMA6D,SEMA3E
3.AD/1.YC	Immature	Down	GO BP	GOBP_TRANSEPITHELIAL_TRANSPORT	GOBP_TRANSEPITHELIAL_TRANSPORT	2.4119	7.66705e-05	0.00153661	CFTR,EDNRB,ACTB,SLC1A3,ACTG1,ITPR1,SLC12A2,AHCYL1,SLC1A2,ABCG2,BEST1
3.AD/1.YC	Immature	Down	GO BP	GOBP_SYNAPTIC_SIGNALING	GOBP_SYNAPTIC_SIGNALING	0.660308	7.67597e-05	0.00153661	UNC13B,PARK7,ADCYAP1,LRRK2,CNR1,CRH,CRHBP,DLG1,EGFR,KIT,SERPINE2,PTN,TAC1,VGF,CD38,CUX2,HRAS,HTR2A,HTR2C,APOE,MBP,NTRK2,PSMC5,RASGRF1,RGS4,PINK1,TPBG,CARTPT,GABARAP,CNP,DVL1,GNAI1,TUBB2B,EXT1,LZTS1,PRKCB,HSPA8,CSPG5,SYT2,NTNG1,LAMA2,RELN,PTPRD,CACNG7,RIMS2,SST,GNA11,SRGN,SLC29A1,KCNJ10,ATP1A2,SLC1A3,CPLX1,STXBP5,SYT9,GAD2,MCTP2,SNCG,VAMP2,KMO,SYT12,CADPS2,RIMS3,CACNB3,CACNA1G,PLP1,ADCY8,HRH2,SYNG…
3.AD/1.YC	Immature	Down	GO BP	GOBP_REGULATION_OF_INTRACELLULAR_PROTEIN_TRANSPORT	GOBP_REGULATION_OF_INTRACELLULAR_PROTEIN_TRANSPORT	1.02826	7.88731e-05	0.00157313	PARK7,LRRK2,FLNA,GLI3,HSP90AB1,TGFB1,PPM1A,SP100,SREBF1,TCF7L2,BAG3,ANGPT1,MDFIC,HRAS,PAK1,PINK1,YWHAB,ITGB1BP1,CDC42,ARIH2,BARD1,MTCL1,C11ORF65,FIS1,BID,APOD,UBL5,TOMM7,PIK3R1,RHOU,VAMP2,CACNB3,PRR5L,SVIP,PRNP,PDCD5,RAPGEF3,OAZ1,YOD1,ZIC1,RIPOR1,SH3TC2,CABP1,CDH1
3.AD/1.YC	Immature	Down	GO BP	GOBP_ORGANOPHOSPHATE_METABOLIC_PROCESS	GOBP_ORGANOPHOSPHATE_METABOLIC_PROCESS	0.56758	8.08112e-05	0.00160225	ADCY7,PARK7,LRRK2,DNAJC19,DLG1,GPX4,HEXB,HMGCS1,IGF1,PDGFRB,PLEKHA1,HDAC4,TGFB1,ACSBG1,ELOVL6,TECR,ATP6V0C,CPS1,AASS,PARP9,CSF1R,FGF2,PIK3R5,HTR2A,HTR2C,ITPKB,PLCE1,PDE8A,PINK1,CNP,GAPDH,TIGAR,RHOQ,ENPP2,PIK3R1,PEMT,PIP4K2A,PAPSS2,SGMS2,FASN,ATP5F1B,KMO,ALDH1A1,NAPEPLD,SLC27A1,SCD,ATP5F1A,TMSB4X,PLPP3,ACSL3,PLA2G4A,ADCY5,ADCY8,NME2,PLPP4,DGKA,ADGRF5,ALDOC,INPP5D,DERA,PFKL,PGAM1,PLSCR1,RORA,PDXK,P…
3.AD/1.YC	Immature	Down	GO BP	GOBP_REGULATION_OF_APOPTOTIC_SIGNALING_PATHWAY	GOBP_REGULATION_OF_APOPTOTIC_SIGNALING_PATHWAY	0.909606	8.09219e-05	0.00160225	PARK7,LRRK2,CTNNA1,IGF1,INHBA,SEPTIN4,BMPR1B,SOD1,STK3,TGFBR1,UBB,PTPRC,RPL11,BCL2L1,RPL26,YAP1,NACC2,WWOX,PSMD10,SP100,TCF7L2,ERP29,AGT,GSTP1,MIF,PPIA,SH3RF1,RPS3,PINK1,TIMP3,TRAF2,SCG2,SLC9A3R1,RPS7,RFFL,FIS1,PPP1CA,CDKN2D,BID,RACK1,SOD2,TAF9,CLU,EYA2,TMBIM1,CX3CR1,GHITM,PDIA3,DAPK2,SLC25A5,NDUFA13,EYA1,PPP2R1B,TMEM14A,ITGA6,ITM2C
3.AD/1.YC	Immature	Down	GO BP	GOBP_TISSUE_HOMEOSTASIS	GOBP_TISSUE_HOMEOSTASIS	1.00209	8.21924e-05	0.00162151	EGFR,EPAS1,GJA1,NOTCH1,SLC2A1,SOD1,SOX9,SPP1,VEGFA,CD38,ATP6AP1,B2M,TF,YAP1,CSF1R,CTSH,GCNT2,ANGPT1,MBP,SYK,TLR4,TNFRSF11A,CARTPT,BARD1,POC1B,MDM1,RAC1,PRDX1,WHRN,LAMA2,ACTB,LRRK1,ADGRV1,CA2,GJB6,ACTG1,ADGRF5,INPP5D,UBASH3B,HOMER2,TJP2,ATP1B2,PDK4,CDH23,SLC12A2,HOMER1
3.AD/1.YC	Immature	Down	GO BP	GOBP_CELL_SUBSTRATE_ADHESION	GOBP_CELL_SUBSTRATE_ADHESION	0.879515	8.5959e-05	0.0016897	TESK2,MERTK,COL16A1,FLNA,ITGA2,NOTCH1,PTN,VEGFA,DDR1,CALR,ADAM15,TTYH1,FERMT2,EPHB1,NPNT,GCNT2,ANGPT1,RELL2,SPRY4,IQGAP1,ITGB1BP1,CDC42,EPHA3,SRGAP2,RAC1,PHLDB2,APOD,DLC1,CSPG5,DOCK1,NTNG1,KANK1,MACF1,ATRNL1,LIMS1,PIK3R1,CARMIL1,AKIP1,PREX1,NTN4,PEAK1,DOCK5,SEMA3E,FREM1,FMN1,ADAMTS9,LGALS1,ACTG1,CD63,ATP1B2,UTRN,HSD17B12,ITGA6,ZYX,EDA,LYPD5,COL5A3,VWC2
3.AD/1.YC	Immature	Down	GO BP	GOBP_TISSUE_MORPHOGENESIS	GOBP_TISSUE_MORPHOGENESIS	0.692394	8.74073e-05	0.00171199	SEMA3A,DLG1,FGFR2,FLNA,PSME4,SULF1,CLIC4,GJA1,GLI3,SOX8,TNC,INHBA,ITGA2,LRP2,NOTCH1,CHD7,ROBO2,BMP7,SOX9,STK3,TGFB2,TGFBR1,TGFBR2,VEGFA,WNT3,DDR1,KDM2B,LGR5,TGFB1,SOX4,YAP1,PSMD10,SOX10,STAT1,FERMT2,CSF1R,CTSH,AGT,EGF,FGF1,FGF2,NPNT,MET,PAK1,SEMA4C,PSMB6,PSMC3,PSMC5,SLC9A3R1,CDC42,RPS7,DVL1,SPEF1,RAC1,PHLDB2,EXT1,PPP1CA,RHOB,TSC2,COBL,DLC1,PLXND1,PLXNB2,LAMA1,MSN,SHROOM3,NTN4,ACTB,SEMA3E,FMN1,HHI…
3.AD/1.YC	Immature	Down	GO BP	GOBP_SMALL_MOLECULE_METABOLIC_PROCESS	GOBP_SMALL_MOLECULE_METABOLIC_PROCESS	0.442754	8.97279e-05	0.00175114	GNPDA1,CFTR,ADCY7,PARK7,AZIN2,LRRK2,CNR1,DLG1,PSME4,GPX4,HMGCS1,IGF1,KIT,LRP2,SLC2A1,SOD1,SOX9,C3,QKI,HDAC4,TGFB1,ABCD2,ACSBG1,HACD4,PEX2,ELOVL6,TECR,MT3,ATP6V0C,CPS1,ASS1,DDAH1,MTAP,MTRR,NOX4,AASS,PSMD10,REST,SREBF1,PARP9,PER2,FGF1,FGF2,GSTP1,HTR2A,APOE,ITPKB,MIF,PLCE1,PDE8A,PSMB6,PSMC3,PSMC5,PINK1,SYK,CNP,GAPDH,MID1IP1,KAT2B,FUT9,PPP1CA,CSGALNACT1,AOAH,ARPP19,APOD,TIGAR,RHOQ,CARMIL1,PEMT,PAPSS2…
3.AD/1.YC	Immature	Down	GO BP	GOBP_NEGATIVE_REGULATION_OF_CATALYTIC_ACTIVITY	GOBP_NEGATIVE_REGULATION_OF_CATALYTIC_ACTIVITY	0.626831	9.15099e-05	0.00177954	PARK7,ADCYAP1,LRRK2,CNR1,EDNRB,NOTCH1,SERPINE2,TESC,PTN,BMP7,NR2F2,TGFB2,C3,VEGFA,DYNLL1,PTPRC,RPL5,RPL11,MT3,GADD45A,MTRR,TXNIP,PARP9,RPL23,SH2B3,IRAK3,DUSP10,CRYAB,SH3RF2,AGT,DUSP6,SPRED2,GSTP1,HRAS,APOE,LYN,PEBP1,PPIA,SH3RF1,RGS3,RGS4,AIDA,TIMP2,TIMP3,C5,YWHAB,SPRY4,IQGAP1,ITGB1BP1,RPS7,RFFL,DVL1,GAPDH,KAT2B,CDKN1C,CDKN2D,ARPP19,LATS2,RACK1,PRDX5,FKBP15,TSC2,FARP1,ANOS1,PIP4K2A,ADGRV1,AMOT,COL…
3.AD/1.YC	Immature	Down	GO BP	GOBP_NEGATIVE_REGULATION_OF_CELL_PROJECTION_ORGANIZATION	GOBP_NEGATIVE_REGULATION_OF_CELL_PROJECTION_ORGANIZATION	1.16763	9.49922e-05	0.00184069	SEMA3A,LRRK2,FLNA,SPP1,WNT3,CD38,MT3,B2M,YAP1,LPAR1,APOE,SEMA4C,SEMA6A,MYLIP,STMN2,SEMA3D,FSTL4,KANK1,LRP4,MAG,OMG,DIP2B,SEMA3B,SEMA6D,SEMA3E,PTPRG,LGALS1,PRNP,ARHGAP24,VIM,PTPN9,ITM2C,DPYSL3,DENND5A
3.AD/1.YC	Immature	Down	GO BP	GOBP_NEGATIVE_REGULATION_OF_INTRACELLULAR_PROTEIN_TRANSPORT	GOBP_NEGATIVE_REGULATION_OF_INTRACELLULAR_PROTEIN_TRANSPORT	2.09455	9.92207e-05	0.00189818	PARK7,LRRK2,SP100,BAG3,ANGPT1,MDFIC,ITGB1BP1,BARD1,C11ORF65,APOD,SVIP,YOD1,CABP1
3.AD/1.YC	Immature	Down	GO BP	GOBP_REGULATION_OF_ACTIN_FILAMENT_BUNDLE_ASSEMBLY	GOBP_REGULATION_OF_ACTIN_FILAMENT_BUNDLE_ASSEMBLY	1.50057	9.93998e-05	0.00189818	FLNA,TAC1,TGFBR1,RGCC,NOX4,FERMT2,LPAR1,MET,PAK1,ITGB1BP1,CDC42,STMN1,RAC1,PHLDB2,DLC1,PIK3R1,CARMIL1,PFN1,ACTG1,RAPGEF3,SYNPO2,ASAP3,CGNL1
3.AD/1.YC	Immature	Down	GO BP	GOBP_NEGATIVE_REGULATION_OF_CELL_DIFFERENTIATION	GOBP_NEGATIVE_REGULATION_OF_CELL_DIFFERENTIATION	0.690055	9.97021e-05	0.00189818	SEMA3A,ADCYAP1,CTNNA1,EDNRB,EGFR,GLI3,SOX8,IGF1,INHBA,NOTCH1,PTN,BMP7,SOX9,SPP1,ZFP36L1,TGFB2,TGFBR1,THRB,VEGFA,WNT3,CALR,HDAC4,TGFB1,MT3,B2M,ID2,HDAC5,OLIG2,YAP1,MEIS2,RARB,REST,SOX2,SOX10,STAT1,NKX6-2,FERMT2,DUSP10,SPRED2,EPHB1,IL18,ITPKB,LYN,PAK1,SEMA4C,SEMA6A,RGS4,ZFP36L2,TLR4,SPRY4,ITGB1BP1,GPR37L1,CARTPT,WDR61,MBNL3,SEMA3D,FSTL4,KANK1,LRP4,MAG,OMG,PIK3R1,DIP2B,SEMA3B,SEMA6D,LIMD1,SEMA3E,LRR…
3.AD/1.YC	Immature	Down	GO BP	GOBP_NEGATIVE_REGULATION_OF_GROWTH	GOBP_NEGATIVE_REGULATION_OF_GROWTH	1.03119	0.000100235	0.00190168	SEMA3A,GJA1,INHBA,NOTCH1,SERPINE2,SPP1,STK3,TGFB2,TGFBR2,WNT3,ADAM15,TGFB1,MT3,JARID2,DUSP10,CRYAB,FGFR3,PAK1,SEMA4C,MAPK11,SEMA6A,RGS4,CDKN2D,RACK1,SEMA3D,FSTL4,MAG,DIP2B,SEMA3B,SEMA6D,SEMA3E,MEIS1,ADRB1,ADIPOR1,NKD1,NDUFA13,MT1E,MT1M,MT1X,MT2A,GNG4,DCBLD2,CCDC85B
3.AD/1.YC	Immature	Down	GO BP	GOBP_REGULATION_OF_ACTIN_FILAMENT_BASED_PROCESS	GOBP_REGULATION_OF_ACTIN_FILAMENT_BASED_PROCESS	0.848446	0.000102617	0.0019334	DLG1,FLNA,PDGFRA,PDGFRB,TAC1,TGFBR1,SPIRE2,TRPM2,RGCC,NOX4,FERMT2,CSF1R,LPAR1,HRAS,MET,PAK1,RGS4,IQGAP1,ITGB1BP1,CDC42,EPHA3,STMN1,RAC1,PHLDB2,EPS8,RHOB,DLC1,CTNNA2,KANK1,RHOQ,RND3,PIK3R1,CARMIL1,PREX1,SEMA3E,RHOBTB1,SVIL,FMN1,ATP1A2,CTNNA3,PFN1,TMSB4X,PHPT1,HIP1R,ACTG1,GSN,ARPC5,IQGAP2,PDE4B,PDE4D,RAPGEF3,ELN,ARFIP2,FCHSD2,CFL2,PLEKHH2,SYNPO2,ASAP3,ARPC5L,CGNL1,TMSB10
3.AD/1.YC	Immature	Down	GO BP	GOBP_REGULATION_OF_CELL_SUBSTRATE_ADHESION	GOBP_REGULATION_OF_CELL_SUBSTRATE_ADHESION	1.07001	0.000104354	0.00195934	COL16A1,FLNA,NOTCH1,PTN,VEGFA,DDR1,CALR,ADAM15,FERMT2,NPNT,GCNT2,RELL2,SPRY4,IQGAP1,ITGB1BP1,CDC42,EPHA3,RAC1,PHLDB2,APOD,DLC1,CSPG5,DOCK1,KANK1,MACF1,LIMS1,PIK3R1,CARMIL1,PREX1,PEAK1,DOCK5,SEMA3E,FMN1,LGALS1,ACTG1,UTRN,HSD17B12,ITGA6,VWC2
3.AD/1.YC	Immature	Down	GO BP	GOBP_REGULATION_OF_OSTEOBLAST_DIFFERENTIATION	GOBP_REGULATION_OF_OSTEOBLAST_DIFFERENTIATION	1.37441	0.000107054	0.00200045	FGFR2,GLI3,IGF1,NOTCH1,BMP7,BMPR1B,SOX9,HDAC4,ATP6AP1,YAP1,REST,ACVR2B,FERMT2,NPNT,RASSF2,LIMD1,RANBP3L,RUNX2,IL6R,IL6ST,NELL1,DDR2,ATRAID,RORB,SMOC1
3.AD/1.YC	Immature	Down	GO BP	GOBP_ANATOMICAL_STRUCTURE_FORMATION_INVOLVED_IN_MORPHOGENESIS	GOBP_ANATOMICAL_STRUCTURE_FORMATION_INVOLVED_IN_MORPHOGENESIS	0.545621	0.000111985	0.00208109	MEF2A,DCN,EPAS1,ETS1,FGFR2,FLNA,SULF1,CLIC4,GJA1,GLI3,SOX8,INHBA,ITGA2,LRP2,MFGE8,NOTCH1,PDGFRA,PDGFRB,HTRA1,PTN,ROBO2,BMP7,SOX9,STK3,TGFB2,TGFBR1,TGFBR2,C3,VEGFA,WNT3,KDM2B,ADAM15,CD9,ADGRG1,TGFB1,SLC39A12,DDAH1,GADD45A,RGCC,SOX4,HDAC5,YAP1,HIPK2,SOX2,SP100,STAT1,ACVR2B,CTSH,BMPER,EGF,EPHB1,FGF1,FGF2,FLT1,SASH1,ANGPT1,IL18,MAP3K3,SEMA4C,SEMA6A,JCAD,SYK,C5,SCG2,ITGB1BP1,CDC42,RPS7,DVL1,PHLDB1,PHL…
3.AD/1.YC	Immature	Down	GO BP	GOBP_NEUROMUSCULAR_JUNCTION_DEVELOPMENT	GOBP_NEUROMUSCULAR_JUNCTION_DEVELOPMENT	1.96462	0.000115699	0.00213131	UNC13B,LRRK2,TNC,PTN,DVL1,LRP4,CACNB3,RER1,UTRN,CACNB4,AGRN,COL4A5,PDZRN3,PPFIBP2
3.AD/1.YC	Immature	Down	GO BP	GOBP_POSITIVE_REGULATION_OF_EXTRINSIC_APOPTOTIC_SIGNALING_PATHWAY	GOBP_POSITIVE_REGULATION_OF_EXTRINSIC_APOPTOTIC_SIGNALING_PATHWAY	1.96462	0.000115699	0.00213131	CTNNA1,INHBA,BMPR1B,STK3,PTPRC,WWOX,AGT,TIMP3,TRAF2,PPP1CA,BID,PDIA3,PPP2R1B,ITM2C
3.AD/1.YC	Immature	Down	GO BP	GOBP_SIGNAL_RELEASE	GOBP_SIGNAL_RELEASE	0.761842	0.000115862	0.00213131	UNC13B,CFTR,PARK7,ADCYAP1,LRRK2,CNR1,CRH,CRHBP,EGFR,GJA1,INHBA,CHD7,MAP2K6,SLC2A1,SPP1,TAC1,VGF,VIP,DYNLL1,CD38,SOX4,REST,SREBF1,TCF7L2,KLF7,PER2,AGT,HTR2A,HTR2C,LYN,PINK1,SYK,TNFRSF11A,CARTPT,DVL1,RAC1,PRKCB,HSPA8,CSPG5,SYT2,RIMS2,CPLX1,STXBP5,SYT9,GAD2,MCTP2,SNCG,VAMP2,KMO,SYT12,CADPS2,RIMS3,KCNA2,DPP4,P2RY12,PLA2G4A,ADCY5,ADCY8,PHPT1,VSNL1,JAGN1,ITPR1,ITPR2,PFKL,SYTL4,RAPGEF3,ABCC4,ABCA1,SLC25…
3.AD/1.YC	Immature	Down	GO BP	GOBP_STRESS_FIBER_ASSEMBLY	GOBP_STRESS_FIBER_ASSEMBLY	1.46242	0.000117043	0.00214578	TAC1,TGFBR1,RGCC,NOX4,FERMT2,LPAR1,MET,PAK1,ITGB1BP1,CDC42,STMN1,RAC1,PHLDB2,DLC1,PIK3R1,CARMIL1,PFN1,ACTG1,RAPGEF3,ELN,ZYX,ASAP3,CGNL1
3.AD/1.YC	Immature	Down	GO BP	GOBP_REGULATION_OF_RESPONSE_TO_EXTERNAL_STIMULUS	GOBP_REGULATION_OF_RESPONSE_TO_EXTERNAL_STIMULUS	0.561059	0.000123891	0.00225897	SEMA3A,PARK7,ADCYAP1,LRRK2,CNR1,EDNRB,EGFR,ETS1,FLNA,PSME4,GJA1,HSP90AB1,IGF1,ITGA2,NOTCH1,PDGFRA,PDGFRB,SERPINE2,HTRA1,PTN,ROBO2,SOD1,SPP1,TAC1,TGFBR2,C3,VEGFA,WNT3,CALR,CD9,PTPRC,TGFB1,RPS19,MT3,PSMD10,STAT1,PARP9,IL33,NR1D2,SH2B3,IRAK3,DUSP10,CSF1R,DDT,AGT,LPAR1,FGF1,FGF2,SASH1,GSTP1,NENF,HRAS,APOE,IL18,LYN,MET,MIF,PAK1,SEMA4C,MAPK13,PSMB6,PSMC3,PSMC5,SEMA6A,SYK,TLR4,TPBG,C5,SCG2,RIPK2,TNFRSF1…
3.AD/1.YC	Immature	Down	GO BP	GOBP_POSITIVE_REGULATION_OF_PROTEIN_MODIFICATION_PROCESS	GOBP_POSITIVE_REGULATION_OF_PROTEIN_MODIFICATION_PROCESS	0.546932	0.000124046	0.00225897	ADCY7,PARK7,ADCYAP1,LRRK2,CRH,DLG1,EDNRB,EGFR,HSPA2,HSPA5,HSP90AB1,IGF1,INHBA,KIT,KITLG,PDGFRB,SEPTIN4,MAP2K6,BMP7,SOD1,SOX9,STK3,TGFB2,TGFBR1,TGFBR2,C3,UBB,VEGFA,HDAC4,PTPRC,TGFB1,MT3,TF,GADD45A,RGCC,ETAA1,SOX4,CDC14B,NOX4,HIPK2,JARID2,PSMD10,RPS27A,SREBF1,UBA52,UBC,PARP9,CCND3,CAMKK2,ERP29,FERMT2,MAP3K8,CSF1R,AGT,DUSP6,LPAR1,EGF,ERBB3,ERBB4,FGD2,FGF1,FGF2,FGFR3,FLT1,SASH1,PIK3R5,ALK,GNG3,ANGPT1…
3.AD/1.YC	Immature	Down	GO BP	GOBP_MACROMOLECULE_CATABOLIC_PROCESS	GOBP_MACROMOLECULE_CATABOLIC_PROCESS	0.480144	0.000126434	0.00229478	PARK7,AZIN2,LRRK2,DCN,EGFR,FLNA,PSME4,GJA1,HEXB,HSPA5,HSP90AB1,LRP2,SERPINE2,RPL29,RPS6,SOX9,ZFP36L1,UBB,VIP,TGFB1,RPL3,RPL5,RPL6,RPL10,RPL11,RPL23A,RPL24,RPL38,RPSA,RPS10,RPS14,RPS15,RPS19,RPS27,RPL26,WWP2,HIPK2,PSMD10,RPS27A,UBA52,UBC,EZR,IL33,RPL23,BAG3,IRAK3,CTSH,SH3RF2,EGF,FGF2,APOE,PSMB6,PSMC3,PSMC5,RPS3,PINK1,ZFP36L2,TIMP2,TIMP3,TRAF2,YWHAB,RBX1,RPL35,RPL13A,RPL10A,RPL7,RPL7A,RPL8,RPL9,RPL…
3.AD/1.YC	Immature	Down	GO BP	GOBP_POSITIVE_REGULATION_OF_NEURON_PROJECTION_DEVELOPMENT	GOBP_POSITIVE_REGULATION_OF_NEURON_PROJECTION_DEVELOPMENT	1.2322	0.00012976	0.00234731	ADCYAP1,CNR1,FLNA,HSPA5,PTN,BMP7,CUX2,ALK,APOE,LYN,NTRK2,IQGAP1,STMN2,DVL1,EPHA3,FUT9,COBL,ZDHHC15,PLXNB2,RELN,SCN1B,FEZ1,GRN,NME2,TOX,ATP1B2,SERPINI1,SNX3,ITGA6,DPYSL3
3.AD/1.YC	Immature	Down	GO BP	GOBP_UROGENITAL_SYSTEM_DEVELOPMENT	GOBP_UROGENITAL_SYSTEM_DEVELOPMENT	0.886997	0.000134728	0.00242912	IFT27,LRRK2,DCN,DLG1,FGFR2,SULF1,GLI3,SOX8,TNC,LRP2,NOTCH1,PDGFRA,PDGFRB,PLAG1,ROBO2,BMP7,SOX9,TGFB2,TGFBR1,VEGFA,ARID5B,LGR5,ASS1,SOX4,YAP1,RARB,STAT1,CTSH,BMPER,AGT,FGF1,FGF2,NPNT,ANGPT1,PLCE1,IQGAP1,EXT1,PLXND1,LRP4,FMN1,SULF2,IL6R,MYO1E,COL4A3,COL4A4,TNS2,FREM2,GCNT4,DCHS2,KIF26B,CA2,FRAS1,MTSS1
3.AD/1.YC	Immature	Down	GO BP	GOBP_INORGANIC_ION_TRANSMEMBRANE_TRANSPORT	GOBP_INORGANIC_ION_TRANSMEMBRANE_TRANSPORT	0.592623	0.000140322	0.00252164	CFTR,PARK7,SLC9B1,DLG1,FLNA,CLIC4,HSPA2,TESC,CHD7,TRPC3,PTPRC,COX17,SLC39A11,SLC39A12,ATP6V1D,ATP6V0C,ATP6V0B,ATP6AP1,TMEM165,TTYH1,TRPM2,SLC30A4,ATP6V1F,WWP2,FGF2,HTR2A,HTR2C,LYN,RGS4,SLC9A3R1,HECW1,KCNH5,CACNG7,SCN1B,CALM2,ATP5F1B,KCNJ10,ATP1A2,SLC1A3,VAMP2,KCNA2,KCNN2,KCNQ1,HCN2,SCN4B,SCN9A,CACNB3,CACNA1G,ATP5F1A,P2RY12,TMSB4X,PLP1,ITPR1,ITPR2,PRNP,UBASH3B,CD63,PDE4B,PDE4D,ATP1B2,SLC12A2,UTRN,…
3.AD/1.YC	Immature	Down	GO BP	GOBP_POSITIVE_REGULATION_OF_GENE_EXPRESSION	GOBP_POSITIVE_REGULATION_OF_GENE_EXPRESSION	0.543081	0.000142617	0.00255445	PARK7,ADCYAP1,CRH,EGFR,ETS1,SULF1,GJA1,TNC,IGF1,INHBA,ITGA2,KIT,NOTCH1,TESC,BMP7,SOD1,SOX9,TGFBR1,C3,VEGFA,VIP,WNT3,CALR,ADAM19,QKI,PTPRC,TGFB1,RPL5,RPL11,RPS27L,MT3,B2M,RGCC,RPL26,SOX4,ID2,YAP1,CTCF,CUX2,MITF,PAWR,STAT1,EZR,IL33,RPL23,ATP6AP2,ERP29,CSF1R,CTSH,DDT,AGT,EGF,ERBB3,FGF1,FGF2,ANGPT1,HRAS,IL18,MBP,MIF,NTRK2,MAPK11,MAPK13,RPS3,PINK1,SYK,TLR4,TRAF2,C5,RIPK2,RPL30,RPS4X,RPS7,RPS9,GAPDH,KA…
3.AD/1.YC	Immature	Down	GO BP	GOBP_RESPONSE_TO_NITROGEN_COMPOUND	GOBP_RESPONSE_TO_NITROGEN_COMPOUND	0.530051	0.000146466	0.00261478	CFTR,ADCY7,LRRK2,CNR1,COL16A1,CRH,CRHBP,CTNNA1,EDNRB,EGFR,FLNA,FOS,GJA1,HMGCS1,HSPA5,HSP90AB1,IGF1,ITGA2,NOTCH1,PCNA,RTF2,PDGFRA,PTN,SLC2A1,BMP7,SOD1,SOX9,ZFP36L1,TAC1,TRPC3,VGF,EIF2B2,CD9,MT3,ATP6V1D,ATP6V0C,ATP6V0B,ATP6AP1,TRPM2,ATP6V1F,CPS1,ASS1,NOX4,HDAC5,SREBF1,STAT1,EZR,CCND3,RPL23,IRAK3,ALK,LAMTOR2,GSTP1,HTR2A,HTR2C,APOE,LYN,NEFL,NTRK2,PAK1,MAPK13,RGS4,SYK,TLR4,TRAF2,BCAR3,RIPK2,IQGAP1,SLC…
3.AD/1.YC	Immature	Down	GO BP	GOBP_SENSORY_ORGAN_DEVELOPMENT	GOBP_SENSORY_ORGAN_DEVELOPMENT	0.719361	0.000150946	0.00268595	MERTK,IFT27,DLG1,EGFR,FGFR2,CLIC4,NECTIN3,GLI3,SOX8,INHBA,KIT,NDP,NOTCH1,PDGFRA,PDGFRB,CHD7,PTN,BMP7,BMPR1B,SOD1,SOX9,TGFB2,TGFBR1,TGFBR2,THRB,VEGFA,DDR1,KDM2B,LGR5,RPL24,RPL38,HIPK2,MAF,MEIS2,MITF,PRRX1,RARB,SOX2,ACVR2B,CRYAB,BMPER,SPRED2,FGF2,FLT1,NTRK2,BCAR3,SLC9A3R1,DCX,DVL1,MDM1,C12ORF57,WHRN,LAMA1,RHOJ,SPARC,SH3PXD2B,MEIS1,TULP3,WNT5B,RORB,SMOC1,ADGRV1,CHRDL1,KCNQ1,FREM2,GJB6,MAN2A1,RCN1,CO…
3.AD/1.YC	Immature	Down	GO BP	GOBP_POSITIVE_REGULATION_OF_CELL_POPULATION_PROLIFERATION	GOBP_POSITIVE_REGULATION_OF_CELL_POPULATION_PROLIFERATION	0.576427	0.000161517	0.00286469	ADCYAP1,CRH,DLG1,EDNRB,EGFR,ETS1,ETV5,FGFR2,FLNA,GJA1,GLI3,SOX8,TNC,IGF1,ITGA2,KIT,LRP2,KITLG,NOTCH1,PDGFRA,PDGFRB,PLAG1,HTRA1,PTN,RPS6,SOX9,TAC1,TGFB2,TGFBR1,TGFBR2,VEGFA,VIP,CALR,ADGRG1,CD38,HDAC4,PTPRC,TGFB1,COX17,SYF2,SOX4,ID2,YAP1,HIPK2,MEIS2,PRRX1,SOX10,STAT1,TCF7L2,RPL23,FERMT2,CSF1R,CTSH,AGT,EGF,ERBB3,ERBB4,FGF1,FGF2,FGFR3,FLT1,GCNT2,HRAS,HTR2A,IL18,LYN,MAP3K3,MIF,NTRK2,PAK1,JCAD,RPS3,SYK…
3.AD/1.YC	Immature	Down	GO BP	GOBP_OSSIFICATION	GOBP_OSSIFICATION	0.825232	0.000162943	0.0028806	EGFR,FGFR2,GLI3,SOX8,TNC,IGF1,NOTCH1,PTN,BMP7,BMPR1B,SOX9,SPP1,TAC1,TGFB2,WNT3,HDAC4,TGFB1,RPL38,RPS15,ATP6AP1,YAP1,SATB2,WWOX,BCOR,REST,SOX2,ACVR2B,FERMT2,FGFR3,NPNT,TNFRSF11A,RASSF2,SBDS,EXT1,CSGALNACT1,LRP4,PLXNB1,SPARC,LIMD1,COL6A1,RANBP3L,XYLT1,RUNX2,PKDCC,SGMS2,FASN,ASF1A,OSTF1,IL6R,IL6ST,NELL1,DDR2,ATP5F1B,ATRAID,SRGN,BMP2K,RORB,CLEC11A,SMOC1,ADGRV1,CHRDL1
3.AD/1.YC	Immature	Down	GO BP	GOBP_CYCLIC_NUCLEOTIDE_CATABOLIC_PROCESS	GOBP_CYCLIC_NUCLEOTIDE_CATABOLIC_PROCESS	3.19786	0.000164194	0.00289333	PDE8A,CNP,PDE4B,PDE4D,PDE10A,PDE7B,PDE7A
3.AD/1.YC	Immature	Down	GO BP	GOBP_RESPONSE_TO_CADMIUM_ION	GOBP_RESPONSE_TO_CADMIUM_ION	1.74311	0.000165311	0.00290361	EGFR,FOS,KIT,PCNA,SOD1,MT3,B2M,SOD2,SPARC,CYBB,GSN,NPC1,MT1E,MT1M,MT1X,MT2A
3.AD/1.YC	Immature	Down	GO BP	GOBP_DEVELOPMENTAL_GROWTH_INVOLVED_IN_MORPHOGENESIS	GOBP_DEVELOPMENTAL_GROWTH_INVOLVED_IN_MORPHOGENESIS	1.01694	0.000166829	0.00292085	SEMA3A,FGFR2,HSP90AB1,TNC,NOTCH1,SOX9,SPP1,TGFBR2,VEGFA,WNT3,DDR1,MT3,YAP1,FGF1,APOE,PAK1,SEMA4C,SEMA6A,IQGAP1,DVL1,EXT1,HSP90AA1,COBL,SYT2,CPNE9,ALCAM,SEMA3D,FSTL4,MACF1,MAG,DIP2B,CACNG7,CDKL5,SEMA3B,SEMA6D,RIMS2,SEMA3E,FMN1,KIF26B,NKD1
3.AD/1.YC	Immature	Down	GO BP	GOBP_REGULATION_OF_ANATOMICAL_STRUCTURE_SIZE	GOBP_REGULATION_OF_ANATOMICAL_STRUCTURE_SIZE	0.739818	0.000175582	0.00306425	SEMA3A,LRRK2,DLG1,EDNRB,EGFR,GJA1,HSP90AB1,SOD1,SPP1,VEGFA,WNT3,SPIRE2,CD38,MT3,CPS1,EZR,PER2,AGT,HTR2A,APOE,NEFL,PAK1,SEMA4C,SEMA6A,ITGB1BP1,SLC9A3R1,RAC1,EXT1,PPP1CA,EPS8,SOD2,CTNNA2,SEMA3D,FSTL4,KANK1,MACF1,MAG,MSN,CARMIL1,PREX1,DIP2B,CDKL5,SEMA3B,DOCK5,SEMA6D,SEMA3E,SVIL,LAMTOR4,FMN1,ATP1A2,ADRB1,PFN1,TMSB4X,HRH2,HIP1R,AP2M1,GSN,ARPC5,IQGAP2,VAV2,SLC12A2,RIN3,ELN,CHRM3,ARHGAP42,AQP4,ARFIP2,FC…
3.AD/1.YC	Immature	Down	GO BP	GOBP_SENSORY_SYSTEM_DEVELOPMENT	GOBP_SENSORY_SYSTEM_DEVELOPMENT	0.826851	0.000181183	0.00315189	SEMA3A,MERTK,DLG1,CLIC4,NECTIN3,GLI3,SOX8,INHBA,NDP,PDGFRA,PDGFRB,CHD7,PTN,BMP7,BMPR1B,SOX9,TGFB2,TGFBR1,TGFBR2,THRB,C3,VEGFA,KDM2B,RPL24,HIPK2,MAF,MEIS2,MITF,RARB,SOX2,ACVR2B,CRYAB,SPRED2,FGF2,FLT1,NTRK2,BCAR3,DCX,MDM1,C12ORF57,LAMA1,RHOJ,SH3PXD2B,MEIS1,TULP3,WNT5B,RORB,SMOC1,CHRDL1,FREM2,P2RY12,MAN2A1,RCN1,COL5A1,NKD1,ADAMTS18,VIM,NHS,SLC17A6
3.AD/1.YC	Immature	Down	GO BP	GOBP_POSITIVE_REGULATION_OF_ENDOTHELIAL_CELL_MIGRATION	GOBP_POSITIVE_REGULATION_OF_ENDOTHELIAL_CELL_MIGRATION	1.38898	0.000183302	0.0031786	ETS1,VEGFA,CALR,TGFB1,AGT,EGF,FGF1,FGF2,SASH1,ANGPT1,MAP3K3,MET,JCAD,ITGB1BP1,RAC1,RHOB,RHOJ,SPARC,ATP5F1B,GRN,ATP5F1A,TMSB4X,PLPP3
3.AD/1.YC	Immature	Down	GO BP	GOBP_REGULATION_OF_TISSUE_REMODELING	GOBP_REGULATION_OF_TISSUE_REMODELING	1.59178	0.000196363	0.00338354	EGFR,SPP1,CD38,TGFB1,ATP6AP1,TF,CSF1R,IL18,SYK,TNFRSF11A,CARTPT,DDR2,CA2,CST3,INPP5D,TMBIM1,UBASH3B,PDK4
3.AD/1.YC	Immature	Down	GO BP	GOBP_RIBOSOMAL_SMALL_SUBUNIT_BIOGENESIS	GOBP_RIBOSOMAL_SMALL_SUBUNIT_BIOGENESIS	1.59178	0.000196363	0.00338354	RPS6,HELB,RPL38,RPSA,RPS27L,MRPS7,RPS10,RPS14,RPS15,RPS19,RPS27,TSR3,RPS7,RPS16,RPS17,RPS21,RPS24,RPS25
3.AD/1.YC	Immature	Down	GO BP	GOBP_EPITHELIAL_TUBE_MORPHOGENESIS	GOBP_EPITHELIAL_TUBE_MORPHOGENESIS	0.891678	0.000202291	0.0034529	DLG1,FGFR2,CLIC4,GLI3,SOX8,TNC,LRP2,NOTCH1,BMP7,SOX9,STK3,TGFB2,TGFBR2,VEGFA,DDR1,KDM2B,LGR5,TGFB1,SOX4,YAP1,CSF1R,CTSH,AGT,EGF,FGF1,FGF2,NPNT,MET,PAK1,SEMA4C,RPS7,DVL1,EXT1,PPP1CA,RHOB,TSC2,COBL,DLC1,PLXND1,PLXNB2,LAMA1,SHROOM3,SEMA3E,FMN1,HHIP,TULP3,KIF26B,MTSS1,LMO4,FZD6,ITGAX
3.AD/1.YC	Immature	Down	GO BP	GOBP_PLATELET_ACTIVATION	GOBP_PLATELET_ACTIVATION	1.18511	0.00020721	0.0035258	MERTK,FLNA,PDGFRA,SERPINE2,TRPC3,CD9,SH2B3,PIK3R5,APOE,LYN,PPIA,SYK,TLR4,PRKCB,HBB,PIK3R1,PRKCQ,ACTB,GNA11,P2RY12,PLA2G4A,ACTG1,FZD6,CSRP1,DGKA,ADAMTS18,ITPR1,ITPR2,PLSCR1,VAV2,UBASH3B
3.AD/1.YC	Immature	Down	GO BP	GOBP_REACTIVE_OXYGEN_SPECIES_METABOLIC_PROCESS	GOBP_REACTIVE_OXYGEN_SPECIES_METABOLIC_PROCESS	0.942276	0.000218891	0.00371296	PARK7,LRRK2,EGFR,HSP90AB1,PDGFRB,BMP7,SOD1,TGFBR2,DYNLL1,HDAC4,TGFB1,ABCD2,MT3,CPS1,ASS1,DDAH1,GADD45A,NOX4,CRYAB,AGT,GSTP1,PINK1,SYK,TLR4,RAC1,HSP90AA1,PRDX5,HBB,PRDX1,SOD2,TIGAR,CLU,PREX1,CYBB,SH3PXD2B,TUSC2,RORA,CX3CR1,PLA2R1,PDK4,PID1,PLIN5,NDUFA13,TAFA4,PXDN
3.AD/1.YC	Immature	Down	GO BP	GOBP_MYOBLAST_DIFFERENTIATION	GOBP_MYOBLAST_DIFFERENTIATION	1.52077	0.000223676	0.00378234	EPAS1,SOX8,IGF1,NOTCH1,SOX9,ZFP36L1,TGFB1,HIF1AN,REST,TCF7L2,IL18,MAPK12,MBNL3,RANBP3L,LGALS1,MEGF10,CXCL14,KCNAB1,CMTM5
3.AD/1.YC	Immature	Down	GO BP	GOBP_REGULATION_OF_PLATELET_AGGREGATION	GOBP_REGULATION_OF_PLATELET_AGGREGATION	2.73899	0.000244831	0.00412725	SERPINE2,CD9,SH2B3,LYN,SYK,PRKCQ,ADAMTS18,UBASH3B
3.AD/1.YC	Immature	Down	GO BP	GOBP_REGULATION_OF_TRANS_SYNAPTIC_SIGNALING	GOBP_REGULATION_OF_TRANS_SYNAPTIC_SIGNALING	0.784174	0.000247238	0.00415497	ADCYAP1,LRRK2,CNR1,CRH,EGFR,KIT,SERPINE2,PTN,TAC1,VGF,CD38,CUX2,HRAS,HTR2A,APOE,NTRK2,PSMC5,RASGRF1,RGS4,PINK1,DVL1,GNAI1,TUBB2B,LZTS1,PRKCB,CSPG5,NTNG1,LAMA2,RELN,PTPRD,CACNG7,RIMS2,SRGN,KCNJ10,ATP1A2,CPLX1,STXBP5,MCTP2,SNCG,VAMP2,KMO,SYT12,RIMS3,CACNB3,ADCY8,SYNGR1,CX3CR1,NSG1,SLC12A2,HOMER1,GRID2,GRIN2D,CACNG4,PLCB4,EIF4EBP2,CDH1,PXK,SORCS3,GRIK3,GRM8,GRIK1,NRGN,BCHE
3.AD/1.YC	Immature	Down	GO BP	GOBP_PLATELET_AGGREGATION	GOBP_PLATELET_AGGREGATION	1.67884	0.000249911	0.00418698	FLNA,PDGFRA,SERPINE2,CD9,SH2B3,LYN,PPIA,SYK,HBB,PRKCQ,ACTB,P2RY12,ACTG1,CSRP1,ADAMTS18,UBASH3B
3.AD/1.YC	Immature	Down	GO BP	GOBP_LIPID_EXPORT_FROM_CELL	GOBP_LIPID_EXPORT_FROM_CELL	1.49723	0.000265617	0.00442289	UNC13B,CRH,GJA1,INHBA,MAP2K6,SPP1,TAC1,AGT,NTRK2,TNFRSF11A,CCK,SLC1A3,CPLX1,VAMP2,KMO,PLA2G4A,SLC12A2,ABCC4,SLC1A2
3.AD/1.YC	Immature	Down	GO BP	GOBP_REGULATION_OF_VASCULATURE_DEVELOPMENT	GOBP_REGULATION_OF_VASCULATURE_DEVELOPMENT	0.928418	0.000268357	0.0044549	DCN,ETS1,SULF1,PTN,TGFB2,TGFBR2,C3,VEGFA,SLC39A12,DDAH1,GADD45A,RGCC,HIPK2,SP100,STAT1,CTSH,BMPER,FGF1,FGF2,FLT1,SASH1,SEMA6A,JCAD,C5,RHOB,PRKCB,PLXND1,GAB1,ENPP2,RHOJ,SPARC,SEMA3E,CYBB,GLUL,AMOT,COL4A3,GRN,ADAMTS9,ITGAX,CX3CR1,F3,RAPGEF3,SLC12A2,VEGFB,THBS2,ADAM12
3.AD/1.YC	Immature	Down	GO BP	GOBP_GLOMERULAR_BASEMENT_MEMBRANE_DEVELOPMENT	GOBP_GLOMERULAR_BASEMENT_MEMBRANE_DEVELOPMENT	3.46016	0.000271431	0.00447861	SULF1,EXT1,SULF2,MYO1E,COL4A3,COL4A4
3.AD/1.YC	Immature	Down	GO BP	GOBP_NEGATIVE_REGULATION_OF_EXTRACELLULAR_MATRIX_ORGANIZATION	GOBP_NEGATIVE_REGULATION_OF_EXTRACELLULAR_MATRIX_ORGANIZATION	3.46016	0.000271431	0.00447861	NOTCH1,TGFB1,FAP,DPP4,CST3,TNFRSF1A
3.AD/1.YC	Immature	Down	GO BP	GOBP_VASCULAR_ENDOTHELIAL_GROWTH_FACTOR_PRODUCTION	GOBP_VASCULAR_ENDOTHELIAL_GROWTH_FACTOR_PRODUCTION	2.136	0.000277211	0.00456016	SULF1,C3,ADGRG1,TGFB1,NDRG2,C5,SULF2,IL6R,IL6ST,ADAMTS3,RORA
3.AD/1.YC	Immature	Down	GO BP	GOBP_ORGANIC_ACID_BIOSYNTHETIC_PROCESS	GOBP_ORGANIC_ACID_BIOSYNTHETIC_PROCESS	0.853138	0.000280093	0.00458701	PARK7,GPX4,QKI,ABCD2,ACSBG1,HACD4,ELOVL6,TECR,CPS1,ASS1,MTAP,MTRR,AASS,PER2,GSTP1,MIF,SYK,MID1IP1,FASN,GLUL,KMO,ADIPOR1,SCD,MGLL,ACSL3,PLA2G4A,PLP1,PTGDS,TBXAS1,FADS2,PDK4,SERINC5,OSBPL1A,ACACB,CYP27A1,ACSS2,ACSS1,STARD4,FOLH1,PSAT1,NAT8L,LIPC,MGST3,ASPA,NDUFAB1,HSD17B12,CARNS1,SHMT1,FA2H,SCD5,GPT2,SUCLA2
3.AD/1.YC	Immature	Down	GO BP	GOBP_COLLAGEN_ACTIVATED_SIGNALING_PATHWAY	GOBP_COLLAGEN_ACTIVATED_SIGNALING_PATHWAY	3.00545	0.00028169	0.00458701	ITGA2,DDR1,SYK,DDR2,COL4A3,UBASH3B,COL4A5
3.AD/1.YC	Immature	Down	GO BP	GOBP_REGULATION_OF_EXTRACELLULAR_MATRIX_ASSEMBLY	GOBP_REGULATION_OF_EXTRACELLULAR_MATRIX_ASSEMBLY	3.00545	0.00028169	0.00458701	NOTCH1,SOX9,TGFB1,RGCC,AGT,PHLDB1,PHLDB2
3.AD/1.YC	Immature	Down	GO BP	GOBP_LOCALIZATION_WITHIN_MEMBRANE	GOBP_LOCALIZATION_WITHIN_MEMBRANE	1.5401	0.000282213	0.00458701	DLG1,FLNA,PTN,PTPRC,APOE,ITGB1BP1,DVL1,RAC1,SSNA1,LRP4,CACNG7,RFTN1,DOCK2,GSN,RER1,CACNG4,AGRN,MAL
3.AD/1.YC	Immature	Down	GO BP	GOBP_MELANOCYTE_DIFFERENTIATION	GOBP_MELANOCYTE_DIFFERENTIATION	2.46203	0.000284702	0.00458803	EDNRB,GLI3,KIT,KITLG,OCA2,MITF,SOX10,GNA11,LRMDA
3.AD/1.YC	Immature	Down	GO BP	GOBP_CELL_DEATH_IN_RESPONSE_TO_HYDROGEN_PEROXIDE	GOBP_CELL_DEATH_IN_RESPONSE_TO_HYDROGEN_PEROXIDE	2.46203	0.000284702	0.00458803	PARK7,LRRK2,PAWR,GPR37,MET,PDE8A,PINK1,GPR37L1,RACK1
3.AD/1.YC	Immature	Down	GO BP	GOBP_CELLULAR_RESPONSE_TO_NITROGEN_COMPOUND	GOBP_CELLULAR_RESPONSE_TO_NITROGEN_COMPOUND	0.617783	0.000287873	0.0046238	CFTR,ADCY7,LRRK2,COL16A1,CRH,CRHBP,CTNNA1,FLNA,GJA1,HSPA5,IGF1,RTF2,PDGFRA,SOD1,SOX9,ZFP36L1,MT3,ATP6V1D,ATP6V0C,ATP6V0B,ATP6AP1,TRPM2,ATP6V1F,CPS1,ASS1,NOX4,HDAC5,SREBF1,EZR,CCND3,RPL23,ALK,LAMTOR2,GSTP1,HTR2A,HTR2C,LYN,NTRK2,PAK1,MAPK13,RGS4,TLR4,TRAF2,BCAR3,RIPK2,SLC9A3R1,KAT2B,PRKCB,TSC2,KANK1,RHOQ,GAB1,PIK3R1,PRKCQ,ACTB,COL6A1,CYBB,LAMTOR4,GNA11,PIP4K2A,VAMP2,KCNQ1,HCN2,TNS2,CA2,SLC27A1,ADIP…
3.AD/1.YC	Immature	Down	GO BP	GOBP_REGULATION_OF_ACTOMYOSIN_STRUCTURE_ORGANIZATION	GOBP_REGULATION_OF_ACTOMYOSIN_STRUCTURE_ORGANIZATION	1.42673	0.000290589	0.00465369	TAC1,TGFBR1,RGCC,NOX4,FERMT2,LPAR1,MET,PAK1,ITGB1BP1,CDC42,STMN1,RAC1,PHLDB2,DLC1,PIK3R1,CARMIL1,PFN1,ACTG1,RAPGEF3,ASAP3,CGNL1
3.AD/1.YC	Immature	Down	GO BP	GOBP_REGULATION_OF_RESPONSE_TO_REACTIVE_OXYGEN_SPECIES	GOBP_REGULATION_OF_RESPONSE_TO_REACTIVE_OXYGEN_SPECIES	2.27355	0.000291567	0.00465567	PARK7,LRRK2,BMP7,PAWR,GPR37,MET,PDE8A,PINK1,GPR37L1,RACK1
3.AD/1.YC	Immature	Down	GO BP	GOBP_RIBONUCLEOSIDE_TRIPHOSPHATE_BIOSYNTHETIC_PROCESS	GOBP_RIBONUCLEOSIDE_TRIPHOSPHATE_BIOSYNTHETIC_PROCESS	1.58964	0.000295791	0.00466835	TGFB1,ATP6V0C,PINK1,ATP5F1B,ATP5F1A,TMSB4X,NME2,PID1,SLC25A13,ATP5MG,ATP5F1C,ATP5F1D,ATP5F1E,ATP5MC1,ATP5MC3,ATP5ME,ATP5PF
3.AD/1.YC	Immature	Down	GO BP	GOBP_ASTROCYTE_DIFFERENTIATION	GOBP_ASTROCYTE_DIFFERENTIATION	1.58964	0.000295791	0.00466835	EGFR,SOX8,NOTCH1,SERPINE2,SOX9,MT3,TLR4,GPR37L1,MAG,POU3F2,SOX6,IL6ST,GRN,PLP1,IFNGR1,BACE2,VIM
3.AD/1.YC	Immature	Down	GO BP	GOBP_REGULATION_OF_CELL_SUBSTRATE_JUNCTION_ORGANIZATION	GOBP_REGULATION_OF_CELL_SUBSTRATE_JUNCTION_ORGANIZATION	1.58964	0.000295791	0.00466835	COL16A1,VEGFA,FERMT2,LAMTOR2,IQGAP1,ITGB1BP1,EPHA3,RAC1,PHLDB2,APOD,DLC1,MACF1,LIMS1,PIK3R1,PEAK1,FMN1,ACTG1
3.AD/1.YC	Immature	Down	GO BP	GOBP_FILOPODIUM_ASSEMBLY	GOBP_FILOPODIUM_ASSEMBLY	1.6478	0.00030474	0.00478186	TGFBR1,TTYH1,TRPM2,EZR,FGD2,CDC42,SRGAP2,SPEF1,RHOQ,GAP43,MYO10,PIK3R1,AGRN,FNBP1L,MIEN1,DPYSL3
3.AD/1.YC	Immature	Down	GO BP	GOBP_REGULATION_OF_HEART_GROWTH	GOBP_REGULATION_OF_HEART_GROWTH	1.6478	0.00030474	0.00478186	FGFR2,GJA1,IGF1,NOTCH1,TGFBR1,TGFBR2,YAP1,JARID2,DUSP6,ERBB4,FGF2,PAK1,MAPK11,RGS4,MEIS1,ACACB
3.AD/1.YC	Immature	Down	GO BP	GOBP_CELLULAR_RESPONSE_TO_INORGANIC_SUBSTANCE	GOBP_CELLULAR_RESPONSE_TO_INORGANIC_SUBSTANCE	0.998088	0.000305953	0.00478711	MEF2A,ADCY7,LRRK2,CRHBP,EGFR,FOS,CLIC4,HSPA5,RTF2,SOD1,CALR,MT3,B2M,TF,TRPM2,ITPKB,TRAF2,IQGAP1,TIGAR,SYT2,CPNE9,CYBB,ADGRV1,SYT9,SYT12,ADCY8,GSN,PRNP,SLC12A2,RYR3,EIF2S1,SLC41A1,MT1E,MT1M,MT1X,MT2A,CDH1,CPNE2
3.AD/1.YC	Immature	Down	GO BP	GOBP_NEGATIVE_REGULATION_OF_ENDOTHELIAL_CELL_PROLIFERATION	GOBP_NEGATIVE_REGULATION_OF_ENDOTHELIAL_CELL_PROLIFERATION	1.97795	0.00032719	0.00509015	SULF1,GJA1,NR2F2,TGFBR1,RGCC,STAT1,FLT1,APOE,SCG2,SPARC,COL4A3,ATP5F1A
3.AD/1.YC	Immature	Down	GO BP	GOBP_CYCLIC_NUCLEOTIDE_METABOLIC_PROCESS	GOBP_CYCLIC_NUCLEOTIDE_METABOLIC_PROCESS	1.97795	0.00032719	0.00509015	ADCY7,PDE8A,CNP,ADCY5,ADCY8,RORA,PDE4B,PDE4D,ADCY2,PDE10A,PDE7B,PDE7A
3.AD/1.YC	Immature	Down	GO BP	GOBP_OSTEOBLAST_DIFFERENTIATION	GOBP_OSTEOBLAST_DIFFERENTIATION	1.02659	0.000330308	0.005124	FGFR2,GLI3,SOX8,TNC,IGF1,NOTCH1,BMP7,BMPR1B,SOX9,SPP1,WNT3,HDAC4,RPS15,ATP6AP1,YAP1,SATB2,WWOX,REST,SOX2,ACVR2B,FERMT2,NPNT,RASSF2,LIMD1,COL6A1,RANBP3L,RUNX2,FASN,ASF1A,IL6R,IL6ST,NELL1,DDR2,ATP5F1B,ATRAID,RORB,SMOC1
3.AD/1.YC	Immature	Down	GO BP	GOBP_REGULATION_OF_GLIOGENESIS	GOBP_REGULATION_OF_GLIOGENESIS	1.48154	0.000339228	0.00524744	ADCYAP1,ETV5,SOX8,LRP2,NOTCH1,SERPINE2,PLAG1,PTN,TGFB1,OLIG2,SOX10,NKX6-2,DUSP10,LYN,GPR37L1,MAG,IL6ST,IDH2,ASPA,DAAM2
3.AD/1.YC	Immature	Down	GO BP	GOBP_CELLULAR_RESPONSE_TO_OXYGEN_LEVELS	GOBP_CELLULAR_RESPONSE_TO_OXYGEN_LEVELS	0.987525	0.000357507	0.00551452	EPAS1,PSME4,NOTCH1,PTN,BMP7,ZFP36L1,UBB,VEGFA,MT3,ATP6AP1,DDAH1,RGCC,BACH1,HIPK2,HIF1AN,PSMD10,RPS27A,UBA52,UBC,LPAR1,PSMB6,PSMC3,PSMC5,PINK1,RBX1,STUB1,LMNA,TIGAR,LIMD1,CYBB,SLC29A1,CACNB3,NDRG1,RORA,HILPDA,HIF3A,CPEB2,EGLN3,CCDC115
3.AD/1.YC	Immature	Down	GO BP	GOBP_POSITIVE_REGULATION_OF_REACTIVE_OXYGEN_SPECIES_METABOLIC_PROCESS	GOBP_POSITIVE_REGULATION_OF_REACTIVE_OXYGEN_SPECIES_METABOLIC_PROCESS	1.38701	0.000362031	0.00556852	PARK7,EGFR,HSP90AB1,PDGFRB,SOD1,TGFBR2,HDAC4,TGFB1,ASS1,DDAH1,GADD45A,NOX4,AGT,GSTP1,SYK,TLR4,HSP90AA1,HBB,SOD2,CLU,PID1
3.AD/1.YC	Immature	Down	GO BP	GOBP_RESPONSE_TO_CYTOKINE	GOBP_RESPONSE_TO_CYTOKINE	0.489109	0.000367243	0.00563278	CRHBP,ETS1,PSME4,FOS,HSPA5,HSP90AB1,KIT,SOD1,SOX9,ZFP36L1,UBB,VEGFA,ARID5B,CD38,HDAC4,PTPRC,TGFB1,RPL3,MT3,B2M,ASS1,BCL2L1,MTAP,YAP1,PRDM5,FOXO3,JARID2,PSMD10,RPS27A,SOX2,SP100,STAT1,UBA52,UBC,PARP9,IL33,SH2B3,IRAK3,MAP3K8,CSF1R,CSF2RA,FGF2,NPNT,ANGPT1,GSTP1,IL18,MAP3K3,MIF,PPIA,MAPK11,MAPK13,PSMB6,PSMC3,PSMC5,RPS3,ZFP36L2,SYK,TIMP2,TIMP3,TLR4,TRAF2,VRK2,RIPK2,TNFRSF11A,RBX1,CDC42,RPL13A,RFFL,RNF…
3.AD/1.YC	Immature	Down	GO BP	GOBP_NEGATIVE_REGULATION_OF_RESPONSE_TO_OXIDATIVE_STRESS	GOBP_NEGATIVE_REGULATION_OF_RESPONSE_TO_OXIDATIVE_STRESS	2.6133	0.000372935	0.00568926	PARK7,LRRK2,GPR37,MET,PDE8A,PINK1,GPR37L1,RACK1
3.AD/1.YC	Immature	Down	GO BP	GOBP_RESPONSE_TO_LIPID	GOBP_RESPONSE_TO_LIPID	0.553371	0.000373015	0.00568926	CFTR,PARK7,ADCYAP1,CNR1,CRH,CRHBP,DCN,EDNRB,EGFR,ETS1,FGFR2,FOS,GJA1,HMGCS1,TNC,IGFBP7,INHBA,ITGA2,NOTCH1,PCNA,PDGFRB,TESC,PTN,CATSPERG,BMP7,SOX9,SPP1,ZFP36L1,TAC1,NR2F2,TGFB2,TGFBR1,TGFBR2,WNT3,CALR,PAQR8,ADAM15,CD38,TGFB1,ACSBG1,CPS1,ASS1,MTAP,HDAC5,YAP1,TXNIP,FOXO3,REST,SOX10,SREBF1,FOXP2,IRAK3,DUSP10,CRYAB,CTSH,LPAR1,SASH1,GSTP1,IL18,LYN,NEFL,PAK1,ZFP36L2,TLR4,RIPK2,TNFRSF11A,CNP,EPHA3,GNAI1,…
[truncated: 3,024 more rows]
