# Supplementary material for: A roadmap to human hippocampal neurogenesis in adulthood, aging and AD.
Source: Research Square preprint supplement (doi:10.21203/rs.3.rs-4469965/v1), 2024-05-30
Supplement: Supplementary file 17 [file ffc7f025b1f278b6d1209c84.xlsx]

## Sheet: motifs_comparison_GABA-Immature
Motif	Motif Name	Immature Log2 Odds Ratio	Immature QValue	GABA Log2 Odds Ratio	GABA QValue
MA0506.1	NRF1	0.470832	7.69693e-192	2.14147	1.21718e-182
MA0470.1	E2F4	0.463309	9.24646e-191	2.15771	3.94619e-186
MA1122.1	TFDP1	0.449728	2.83251e-182	1.98928	1.18257e-158
MA0732.1	EGR3	0.398494	9.40831e-164	1.85314	1.05712e-139
MA0162.3	EGR1	0.439177	9.96019e-162	1.89236	7.30843e-140
MA0131.2	HINFP	0.438889	2.06714e-140	1.86496	2.36672e-127
MA0632.1	Tcfl5	0.514518	2.49515e-136	2.11649	1.07027e-137
MA0527.1	ZBTB33	0.516981	2.42655e-133	2.14511	3.14614e-139
MA0740.1	KLF14	0.359111	2.95085e-133	1.75624	5.56171e-126
MA0733.1	EGR4	0.356633	6.78675e-133	1.68185	5.76166e-116
MA0472.2	EGR2	0.395799	4.28038e-132	1.6782	4.03796e-109
MA0685.1	SP4	0.334908	2.24349e-122	1.66288	5.46727e-112
MA0741.1	KLF16	0.309237	1.68833e-108	1.46161	1.0003e-80
MA0746.1	SP3	0.306355	2.1356e-106	1.48641	1.82856e-82
MA0747.1	SP8	0.286294	3.70909e-93	1.38174	7.63997e-75
MA0751.1	ZIC4	0.288658	2.6234e-88	1.01745	2.686e-43
MA1099.1	Hes1	0.379883	1.42805e-84	1.5687	1.4616e-75
MA0750.2	ZBTB7A	0.291034	5.03373e-84	1.45436	1.06387e-86
MA0003.3	TFAP2A	0.286738	2.08926e-83	1.01368	3.20392e-42
MA0516.1	SP2	0.280202	2.63254e-81	1.48731	5.19155e-66
MA0079.3	SP1	0.275618	7.29381e-79	1.48416	6.06277e-66
MA0599.1	KLF5	0.269724	9.71766e-79	1.34515	2.28586e-60
MA0815.1	TFAP2C	0.280338	5.94527e-75	1.01367	8.29031e-41
MA0742.1	Klf12	0.258296	1.84526e-68	1.09119	3.1854e-49
MA0062.2	Gabpa	0.293948	4.85304e-65	1.58539	1.07999e-91
MA0765.1	ETV5	0.389017	1.20455e-61	1.97402	2.01514e-100
MA0471.1	E2F6	0.23084	5.38269e-61	1.04114	1.46708e-44
MA0028.2	ELK1	0.362569	5.328e-58	1.97923	8.40222e-108
MA0493.1	Klf1	0.224183	4.74742e-57	1.03757	6.08529e-45
MA0735.1	GLIS1	0.289441	6.59131e-52	1.08216	2.31062e-34
MA0759.1	ELK3	0.339886	6.74718e-51	1.91643	1.28111e-99
MA0695.1	ZBTB7C	0.242829	2.5073e-49	1.0546	7.10478e-41
MA0761.1	ETV1	0.352742	1.20284e-48	1.97101	1.36582e-97
MA0076.2	ELK4	0.237809	1.20284e-48	1.29293	6.82023e-64
MA0764.1	ETV4	0.349302	4.5184e-48	1.94698	3.27799e-95
MA0156.2	FEV	0.305026	4.49032e-39	1.83011	4.0401e-86
MA0014.3	PAX5	0.226205	3.09417e-36	1.00781	6.85925e-33
MA0475.2	FLI1	0.265193	3.42986e-33	1.62999	4.7817e-71
MA0763.1	ETV3	0.280369	5.81173e-33	1.75231	1.80344e-77
MA0748.1	YY2	0.295081	1.17779e-31	1.75066	8.12853e-69
MA0473.2	ELF1	0.223832	3.03857e-30	1.38823	4.6969e-59
MA0645.1	ETV6	0.200992	1.05848e-29	1.24344	3.80211e-53
MA0474.2	ERG	0.243627	1.99252e-28	1.53541	1.92302e-62
MA0098.3	ETS1	0.225172	7.31227e-28	1.4391	1.19664e-59
MA0615.1	Gmeb1	0.371559	2.25348e-27	1.66136	2.55497e-35
MA0641.1	ELF4	0.200083	8.28132e-26	1.27181	9.33622e-51
MA0760.1	ERF	0.215058	6.20917e-23	1.37536	1.57558e-49
MA0024.3	E2F1	0.291984	1.53142e-19	1.27471	5.11753e-21
MA0686.1	SPDEF	0.215325	4.5103e-19	1.36706	9.1535e-42
MA0067.1	Pax2	0.239819	4.08784e-18	1.15717	2.31917e-22
MA0598.2	EHF	0.159605	2.70803e-16	1.11543	2.55106e-37
MA0604.1	Atf1	0.250951	4.35183e-16	1.70656	1.35475e-47
MA0609.1	Crem	0.292244	1.02937e-13	1.68758	2.84074e-30
MA0638.1	CREB3	0.192675	5.31685e-13	1.13038	5.37064e-23
MA0502.1	NFYB	0.146316	3.78724e-12	1.47579	3.08365e-63
MA0636.1	BHLHE41	0.196058	5.32997e-12	1.06509	5.46419e-18
MA1140.1	JUNB	0.192799	3.89552e-08	1.31891	1.41037e-20
MA0834.1	ATF7	0.159432	1.50538e-07	1.255	1.12389e-23
MA0060.3	NFYA	0.100023	1.31611e-06	1.24709	1.40169e-44
MA1136.1	FOSB::JUNB	0.148978	1.97444e-06	1.16112	7.01091e-19
MA1133.1	JUN::JUNB	0.114372	7.00096e-06	1.06541	2.58116e-22
MA1139.1	FOSL2::JUNB	0.139862	7.12371e-06	1.10052	7.10766e-17
MA1145.1	FOSL2::JUND	0.115765	7.54536e-06	1.05724	2.9219e-21
MA1143.1	FOSL1::JUND	0.11679	3.79015e-05	1.1743	4.4322e-23
MA1129.1	FOSL1::JUN	0.134855	4.21632e-05	1.12086	6.28456e-16
MA0840.1	Creb5	0.114941	0.000107882	1.09663	2.6727e-18
MA0656.1	JDP2	0.104189	0.000163707	1.03658	3.61053e-18
MA0749.1	ZBED1	0.158035	0.00426826	1.15012	5.48631e-07

## Sheet: Sheet1
Motif Name	Immature Log2 Odds Ratio	GABA Log2 Odds Ratio
NRF1	0.470832	2.14147
E2F4	0.463309	2.15771
TFDP1	0.449728	1.98928
EGR3	0.398494	1.85314
EGR1	0.439177	1.89236
HINFP	0.438889	1.86496
Tcfl5	0.514518	2.11649
ZBTB33	0.516981	2.14511
KLF14	0.359111	1.75624
EGR4	0.356633	1.68185
EGR2	0.395799	1.6782
SP4	0.334908	1.66288
KLF16	0.309237	1.46161
SP3	0.306355	1.48641
SP8	0.286294	1.38174
ZIC4	0.288658	1.01745
Hes1	0.379883	1.5687
ZBTB7A	0.291034	1.45436
TFAP2A	0.286738	1.01368
SP2	0.280202	1.48731
SP1	0.275618	1.48416
KLF5	0.269724	1.34515
TFAP2C	0.280338	1.01367
Klf12	0.258296	1.09119
Gabpa	0.293948	1.58539
ETV5	0.389017	1.97402
E2F6	0.23084	1.04114
ELK1	0.362569	1.97923
Klf1	0.224183	1.03757
GLIS1	0.289441	1.08216
ELK3	0.339886	1.91643
ZBTB7C	0.242829	1.0546
ETV1	0.352742	1.97101
ELK4	0.237809	1.29293
ETV4	0.349302	1.94698
FEV	0.305026	1.83011
PAX5	0.226205	1.00781
FLI1	0.265193	1.62999
ETV3	0.280369	1.75231
YY2	0.295081	1.75066
ELF1	0.223832	1.38823
ETV6	0.200992	1.24344
ERG	0.243627	1.53541
ETS1	0.225172	1.4391
Gmeb1	0.371559	1.66136
ELF4	0.200083	1.27181
ERF	0.215058	1.37536
E2F1	0.291984	1.27471
SPDEF	0.215325	1.36706
Pax2	0.239819	1.15717
EHF	0.159605	1.11543
Atf1	0.250951	1.70656
Crem	0.292244	1.68758
CREB3	0.192675	1.13038
NFYB	0.146316	1.47579
BHLHE41	0.196058	1.06509
JUNB	0.192799	1.31891
ATF7	0.159432	1.255
NFYA	0.100023	1.24709
FOSB::JUNB	0.148978	1.16112
JUN::JUNB	0.114372	1.06541
FOSL2::JUNB	0.139862	1.10052
FOSL2::JUND	0.115765	1.05724
FOSL1::JUND	0.11679	1.1743
FOSL1::JUN	0.134855	1.12086
Creb5	0.114941	1.09663
JDP2	0.104189	1.03658
ZBED1	0.158035	1.15012
